# Supplementary material for: Cytokines Interleukin-1β and Tumor Necrosis Factor-α Regulate Different Transcriptional and Alternative Splicing Networks in Primary β-Cells
Source: Oxford University Press journal article supplement (doi:10.2337/db09-1159), 2009-11-23
Supplement: db091159-sup-suppl_table_iii.xls [file db091159-sup-suppl_table_iii.xls]

## Sheet: Sheet2
Suppl. Table III: List of all transcripts detected as present by array analysis in FACS purified rat b-cells
				IL+IFN 6h		IL+IFN 24h		TNF+IFN 6h		TNF+IFN 24h
Probe Set ID	GeneBank	Gene Title	Gene Symbol	FC	Pval	FC	Pval	FC	Pval	FC	Pval
1371748_at	BI284306	1-acylglycerol-3-phosphate O-acyltransferase 1	Agpat1	0.986779	0.510589	0.798519	0.0538644	1.20012	0.162536	0.959009	0.553481
1374570_at	AI012474	1-acylglycerol-3-phosphate O-acyltransferase 2 (lysophosphatidic acid acyltransferase, beta) (predicted)	Agpat2_predicted	0.91249	0.76066	1.6056	0.0665725	0.686737	0.140088	1.19298	0.093355
1382041_at	BI290161	1-acylglycerol-3-phosphate O-acyltransferase 3 (predicted)	Agpat3_predicted	0.463088	0.030418	0.551557	0.424344	0.384926	0.122162	0.477944	0.188742
1380480_at	AI711263	1-acylglycerol-3-phosphate O-acyltransferase 3 (predicted)	Agpat3_predicted	0.998043	0.983977	0.966507	0.964582	0.999197	0.99537	0.998858	0.995323
1368194_at	NM_133406	1-acylglycerol-3-phosphate O-acyltransferase 4 (lysophosphatidic acid acyltransferase, delta)	Agpat4	1.33543	0.455747	2.21062	3.73406e-05	1.0628	0.258073	1.80276	0.00437099
1378284_at	BI292067	1-acylglycerol-3-phosphate O-acyltransferase 5 (lysophosphatidic acid acyltransferase, epsilon) (predicted)	Agpat5_predicted	0.975783	0.159454	0.344581	0.0231885	0.727896	0.0768346	0.494102	0.183119
1373169_at	AI175416	1-acylglycerol-3-phosphate O-acyltransferase 5 (lysophosphatidic acid acyltransferase, epsilon) (predicted)	Agpat5_predicted	1.03442	0.9168	0.880972	0.199335	0.877714	0.932939	0.970913	0.563833
1390966_at	BE111759	1-acylglycerol-3-phosphate O-acyltransferase 6 (lysophosphatidic acid acyltransferase, zeta)	Agpat6	1.12648	0.399496	0.440104	0.0124371	1.78017	0.347628	0.892712	0.378564
1384383_at	BF557230	1-acylglycerol-3-phosphate O-acyltransferase 6 (lysophosphatidic acid acyltransferase, zeta)	Agpat6	1.00341	0.874264	0.997184	0.992449	0.998391	0.882115	0.999085	0.992197
1391754_at	BM391818	2 ' -5 ' oligoadenylate synthetase 1I	Oas1i	5.63777	0.000252995	2.7844	0.00799577	7.75937	5.88706e-05	4.64447	0.00213077
1388544_at	BI294941	2,3-bisphosphoglycerate mutase	Bpgm	2.39357	0.0183283	1.41967	0.171836	3.09726	0.00419053	1.99671	0.00452308
1367777_at	NM_057197	2,4-dienoyl CoA reductase 1, mitochondrial	Decr1	0.451516	0.0126292	0.356899	0.000179273	0.404171	0.0273245	0.444661	0.00045134
1371152_a_at	Z18877	2',5'-oligoadenylate synthetase 1, 40/46kDa	Oas1	9.70128	0.0381422	6.20673	0.00102246	41.4252	0.000830357	13.2167	0.00222412
1372012_at	BF417479	24-dehydrocholesterol reductase	Dhcr24	0.277633	0.0482731	0.900116	0.0364267	0.470259	0.0849157	0.686558	0.013351
1370818_at	AF044574	2-4-dienoyl-Coenzyme A reductase 2, peroxisomal	Decr2	0.655106	0.00273517	0.786728	0.109251	0.777814	0.0726962	0.809477	0.253198
1388056_at	AF068268	2-5 oligoadenylate synthetase 1B	Oas1b	7.33136	0.00259734	2.0699	0.0392555	23.4742	7.58355e-06	6.53537	0.00972505
1377497_at	BF419319	2'-5' oligoadenylate synthetase-like 1	Oasl1	8.93829	0.0517552	1.95605	0.0341795	41.1806	2.95134e-05	17.6478	0.000177759
1391755_at	AI535177	3-hydroxy-3-methylglutaryl-Coenzyme A lyase	Hmgcl	1.0202	0.311477	0.998979	0.992899	1.00723	0.37269	1.00019	0.933438
1367767_at	NM_024386	3-hydroxy-3-methylglutaryl-Coenzyme A lyase	Hmgcl	1.24446	0.99617	1.32246	0.210325	0.401397	0.0218659	1.1414	0.220661
1375852_at	BM390399	3-hydroxy-3-methylglutaryl-Coenzyme A reductase	Hmgcr	0.684009	0.0570003	0.817931	0.0319617	0.778836	0.381691	0.67731	0.0100705
1387848_at	NM_013134	3-hydroxy-3-methylglutaryl-Coenzyme A reductase	Hmgcr	0.701888	0.132214	0.589941	0.0236532	0.589054	0.104598	0.809115	0.0560188
1367932_at	NM_017268	3-hydroxy-3-methylglutaryl-Coenzyme A synthase 1	Hmgcs1	0.851212	0.289394	0.572287	0.015489	0.879349	0.747163	0.581063	0.0478185
1382260_at	AW531471	3-hydroxybutyrate dehydrogenase, type 1	Bdh1	0.999171	0.725948	0.702011	0.140581	1.03596	0.848587	0.780781	0.317895
1388118_at	AI176586	3-hydroxyisobutyrate dehydrogenase	Hibadh	0.548222	0.0006928	0.897288	0.11747	0.47373	0.0438868	0.687253	0.0759667
1373564_at	AI410548	3-hydroxyisobutyryl-Coenzyme A hydrolase	Hibch	0.940378	0.761713	1.50249	0.171624	0.411006	0.0348675	1.15637	0.505278
1371850_at	AA892829	3'-phosphoadenosine 5'-phosphosulfate synthase 1 (predicted)	Papss1_predicted	0.466209	0.0197961	0.729351	0.000749996	0.583459	0.0631241	0.699484	0.0712289
1370052_at	NM_031081	3-phosphoinositide dependent protein kinase-1	Pdpk1	1.10824	0.885577	0.804567	0.912002	0.972458	0.146115	0.741618	0.2412
1369799_at	U29701	4-aminobutyrate aminotransferase	Abat	0.537997	0.0137106	0.630706	0.0183901	0.58969	0.0861816	0.511842	0.109383
1375321_at	BF393840	4-aminobutyrate aminotransferase	Abat	0.900976	0.0811769	0.986506	0.902182	0.899498	0.764782	0.889434	0.617282
1391365_at	BF416465	4-aminobutyrate aminotransferase	Abat	0.952746	0.757435	0.401195	0.00701217	1.80706	0.522292	0.428499	0.0637099
1388537_at	BF554891	4-nitrophenylphosphatase domain and non-neuronal SNAP25-like protein homolog 1 (C. elegans)	Nipsnap1	0.610657	0.257081	0.731623	0.0313916	0.827663	0.841034	0.687136	0.217
1390454_at	BI289807	4-nitrophenylphosphatase domain and non-neuronal SNAP25-like protein homolog 1 (C. elegans)	Nipsnap1	0.936132	0.977906	0.835245	0.0384728	0.826633	0.34364	0.832342	0.33385
1384112_at	BI289470	5' nucleotidase, ecto	Nt5e	1.71927	0.0532298	0.760112	0.198384	0.708303	0.316845	0.788049	0.703731
1369200_at	NM_021576	5' nucleotidase, ecto	Nt5e	0.963567	0.446086	1.11093	0.830047	0.972126	0.840431	0.939166	0.75943
1392719_at	AA957588	5,10-methenyltetrahydrofolate synthetase (5-formyltetrahydrofolate cyclo-ligase)	Mthfs	0.84814	0.792666	1.3486	0.0386222	0.701813	0.0827786	1.40856	0.132102
1384370_at	BF542664	5,10-methenyltetrahydrofolate synthetase (5-formyltetrahydrofolate cyclo-ligase)	Mthfs	1.00151	0.917747	1.49974	0.0333253	0.843209	0.172069	1.11785	0.0220121
1381768_at	AW535082	5,10-methenyltetrahydrofolate synthetase (5-formyltetrahydrofolate cyclo-ligase)	Mthfs	1.02405	0.945104	2.30314	0.00559221	0.844793	0.27008	2.03432	0.00867063
1385254_at	BE104427	5'-3' exoribonuclease 1 (predicted)	Xrn1_predicted	1.17788	0.0109606	1.01039	0.971206	0.996571	0.544995	0.998419	0.82898
1391107_at	BI275784	5'-3' exoribonuclease 1 (predicted)	Xrn1_predicted	4.01971	0.0189971	1.78901	0.0606554	3.50418	0.0303768	2.69237	0.0484116
1378759_at	BE102644	5'-3' exoribonuclease 1 (predicted)	Xrn1_predicted	2.00607	0.0197015	1.45788	0.0518824	1.63578	0.162675	1.19263	0.0699964
1391412_at	AA996841	5'-3' exoribonuclease 2 (predicted)	Xrn2_predicted	1.10301	0.710609	2.56439	0.00453052	1.37651	0.0247699	1.82806	0.00385555
1393702_at	BF397290	5'-3' exoribonuclease 2 (predicted)	Xrn2_predicted	0.911478	0.884306	1.34264	0.0685554	1.22254	0.16722	1.21446	0.107154
1369962_at	NM_031014	5-aminoimidazole-4-carboxamide ribonucleotide formyltransferase/IMP cyclohydrolase	Atic	0.499486	0.243209	1.61608	0.0105894	0.513459	0.00187242	1.67687	0.00352419
1388631_at	AI177093	5-azacytidine induced gene 2	Azi2	1.6188	0.107619	1.90486	0.0301965	2.26721	0.00180658	1.65388	0.0606388
1369456_at	NM_017250	5-hydroxytryptamine (serotonin) receptor 2B	Htr2b	0.990597	0.603847	0.99551	0.286221	1.45211	0.117959	1.01506	0.0427051
1388219_at	L10073	5-hydroxytryptamine (serotonin) receptor 5B	Htr5b	0.919001	0.550389	0.936011	0.387084	1.00142	0.221159	0.939841	0.342547
1387545_at	NM_030864	5-methyltetrahydrofolate-homocysteine methyltransferase	Mtr	1.12161	0.861501	2.14573	0.0146363	0.861408	0.613725	1.41729	0.871135
1398642_at	BI279274	5-methyltetrahydrofolate-homocysteine methyltransferase reductase	Mtrr	0.727754	0.059152	1.25031	0.274506	1.48068	0.66974	0.655547	0.0669883
1384423_at	AW140661	5'-nucleotidase, cytosolic II (predicted)	Nt5c2_predicted	0.398467	0.0872389	0.670687	0.0726998	0.507471	0.0855091	0.79137	0.0256585
1373412_at	AI409146	5'-nucleotidase, cytosolic III (predicted)	Nt5c3_predicted	1.08275	0.726119	0.493969	0.00736437	3.08245	0.000718486	1.22199	0.0483236
1389131_at	BF412799	5'-nucleotidase, cytosolic III-like	Nt5c3l	0.796523	0.178497	0.661571	0.36864	0.64156	0.725887	0.788376	0.289588
1391306_at	AI070952	5-oxoprolinase (ATP-hydrolysing)	Oplah	0.629612	0.394548	1.16937	0.436159	0.412125	0.0480117	0.973488	0.903576
1378976_x_at	AI070952	5-oxoprolinase (ATP-hydrolysing)	Oplah	0.713944	0.464587	1.13599	0.323822	0.425334	0.00924187	1.07771	0.191881
1388044_at	L27084	6-phosphofructo-2-kinase/fructose-2,6-biphosphatase 2	Pfkfb2	1.13108	0.142024	0.515852	0.000511292	0.959258	0.447827	0.489652	0.0229134
1382712_at	AI044245	6-phosphofructo-2-kinase/fructose-2,6-biphosphatase 2	Pfkfb2	0.789877	0.511747	0.510172	0.0124692	0.676465	0.170725	0.283016	0.00162419
1374523_at	AI231339	6-phosphogluconolactonase (predicted)	Pgls_predicted	0.644729	0.0972499	0.596961	0.248189	0.633447	0.351862	0.483527	0.016747
1369304_at	NM_017220	6-pyruvoyl-tetrahydropterin synthase	Pts	1.00005	0.626186	0.991582	0.8277	0.996625	0.98356	0.98126	0.645915
1368189_at	NM_022389	7-dehydrocholesterol reductase	Dhcr7	0.696955	0.0825989	0.955094	0.489896	0.486915	0.382795	0.79355	0.184951
1370040_at	NM_030870	8-oxoguanine DNA-glycosylase 1	Ogg1	0.947157	0.626975	0.997001	0.991497	0.673807	0.658821	0.998517	0.97971
1371420_at	AI412054	92Aa-Protein	LOC494529	0.633035	0.0484513	0.670031	0.246955	0.590473	0.208023	0.616168	0.234768
1387135_at	NM_020308	a disintegrin and metallopeptidase domain 15 (metargidin)	Adam15	0.780262	0.0787621	0.386607	0.0210943	0.640252	0.117898	0.24272	0.0414478
1387256_at	NM_020078	a disintegrin and metallopeptidase domain 1a	Adam1a	1.00071	0.433002	0.981263	0.589645	0.972259	0.606711	0.700453	0.133736
1388161_at	BI300565	a disintegrin and metalloprotease domain 10	Adam10	0.982521	0.249341	0.790824	0.0859218	1.04378	0.481271	0.847851	0.105305
1369833_at	NM_020077	a disintegrin and metalloprotease domain 2	Adam2	1.26095	0.872341	1.15446	0.241244	2.81615	0.0302608	1.01812	0.448306
1369832_at	NM_020302	a disintegrin and metalloprotease domain 3 (cyritestin)	Adam3	1.09879	0.820275	1.16745	0.942151	1.24733	0.277863	1.11244	0.97846
1394612_at	AW535206	A disintegrin and metalloprotease domain 4	Adam4	0.934458	0.53418	0.437548	0.0110384	1.22454	0.272304	0.753932	0.0411594
1390046_at	BI288110	a disintegrin and metalloprotease domain 8 (predicted)	Adam8_predicted	0.826342	0.7253	5.73908	0.000402399	1.16333	0.774934	1.25926	0.208456
1367922_at	NM_020306	a disintegrin and metalloproteinase domain 17 (tumor necrosis factor, alpha, converting enzyme)	Adam17	3.58566	3.94618e-05	2.03503	0.00395299	3.59838	0.00109796	2.08899	0.0223816
1375337_at	AI011712	a disintegrin and metalloproteinase domain 9 (meltrin gamma) (predicted)	Adam9_predicted	1.37632	0.44064	0.550753	0.0814388	1.49925	0.327069	0.57733	0.0613549
1394518_at	BF284436	A disintegrin-like and metalloprotease (reprolysin type) with thrombospondin type 1 motif, 9 (predicted)	Adamts9_predicted	0.796729	0.115061	0.953409	0.951908	1.33024	0.773791	1.00131	0.979071
1368869_at	BG663107	A kinase (PRKA) anchor protein (gravin) 12	Akap12	13.7253	0.000397122	3.96446	0.0156614	17.5296	0.000436032	3.45008	0.00755269
1368868_at	NM_057103	A kinase (PRKA) anchor protein (gravin) 12	Akap12	1.97983	0.00813321	0.991057	0.0772335	1.44464	0.344674	1.00189	0.155342
1383151_at	AI011474	A kinase (PRKA) anchor protein (yotiao) 9	Akap9	1.45231	0.223046	0.715808	0.105157	1.2658	0.896269	0.86621	0.140063
1384857_at	AI145240	A kinase (PRKA) anchor protein (yotiao) 9	Akap9	0.972737	0.971523	0.965651	0.43296	1.10171	0.595679	0.71492	0.231089
1383358_at	AI072577	A kinase (PRKA) anchor protein 1	Akap1	1.53331	0.339488	2.03707	0.00192144	1.23355	0.787847	1.57586	0.00402836
1395278_at	BI299865	A kinase (PRKA) anchor protein 10 (predicted)	Akap10_predicted	1.61391	0.975514	1.35005	0.0508767	1.01267	0.962872	1.53536	0.00773503
1368427_at	NM_012773	A kinase (PRKA) anchor protein 11	Akap11	1.20847	0.156946	1.20428	0.241951	1.11939	0.157365	1.22007	0.0707391
1390883_at	AI501759	A kinase (PRKA) anchor protein 11	Akap11	0.834084	0.273691	0.310741	0.00250516	0.863854	0.484672	0.591147	0.025684
1392049_at	BF411767	A kinase (PRKA) anchor protein 11	Akap11	0.920952	0.753435	0.684556	0.113156	1.23974	0.674126	0.617046	0.0493193
1381842_at	AI511309	A kinase (PRKA) anchor protein 13	Akap13	0.699319	0.320941	0.886691	0.940329	1.08423	0.252589	1.0978	0.144694
1382268_at	AW526712	A kinase (PRKA) anchor protein 13	Akap13	0.778399	0.524505	0.469625	0.0584363	0.747723	0.186911	0.580722	0.0106392
1386521_at	AI511291	A kinase (PRKA) anchor protein 2	Akap2	3.13798	0.0413988	1.98392	0.0581611	18.7756	2.54524e-05	10.1569	0.0119039
1382206_a_at	BF398063	A kinase (PRKA) anchor protein 2	Akap2	1.15072	0.180941	0.992823	0.881768	16.5862	2.372e-05	1.56026	0.354087
1391548_at	AA955786	A kinase (PRKA) anchor protein 5	Akap5	2.08883	0.00854863	0.932344	0.600481	1.77627	0.00113284	0.69822	0.236237
1380914_at	AI175405	A kinase (PRKA) anchor protein 5	Akap5	1.31225	0.151743	1.32813	0.0733912	1.82726	0.0504292	1.50804	0.127946
1378880_at	AW532591	A kinase (PRKA) anchor protein 5	Akap5	1.54155	0.397167	1.27691	0.0463682	1.81526	0.065197	1.63574	0.00275958
1381619_at	BE116003	A kinase (PRKA) anchor protein 5	Akap5	1.33784	0.706845	1.13321	0.855876	1.25688	0.242127	1.01887	0.376074
1389496_at	BI300893	A kinase (PRKA) anchor protein 7	Akap7	0.34728	0.0325664	0.719267	0.0148035	0.258684	0.0025691	0.579478	0.0737999
1392079_at	AW526264	A kinase (PRKA) anchor protein 7	Akap7	0.852351	0.0990392	0.842925	0.587729	0.84749	0.448435	0.661517	0.536442
1370911_at	U01914	A kinase (PRKA) anchor protein 8	Akap8	0.804036	0.046649	0.99192	0.666814	1.02433	0.181096	1.0178	0.448056
1385713_at	BF392577	A kinase (PRKA) anchor protein 8-like	Akap8l	0.520975	0.303176	0.58937	0.147943	1.00412	0.828856	0.583263	0.0154226
1375813_at	BE102687	A kinase (PRKA) anchor protein 8-like	Akap8l	1.02942	0.710906	1.85655	0.193529	1.02263	0.369163	0.943035	0.614381
1390375_at	BF414692	A kinase (PRKA) anchor protein 8-like	Akap8l	0.979785	0.80534	0.769389	0.0996866	0.985398	0.907397	0.654356	0.0510485
1376720_at	BG376414	aarF domain containing kinase 2 (predicted)	Adck2_predicted	0.770199	0.515346	0.816344	0.263397	0.789129	0.0376239	0.875996	0.149934
1389043_at	AI101347	aarF domain containing kinase 4	Adck4	1.64594	0.51857	3.26643	0.00420572	1.33907	0.450194	1.64495	0.0466443
1398194_at	BF405720	AarF domain containing kinase 4	Adck4	1.2167	0.768695	0.965868	0.354167	1.29461	0.187327	1.00258	0.99704
1374746_at	AA891922	Ab1-152	LOC500877	1.49577	0.00483945	1.51875	0.000679833	1.48548	0.00508377	1.99201	0.00963138
1385397_at	AA859085	Ab1-219	LOC499991	17.4237	0.000151627	2.44373	4.50303e-05	16.6798	0.000368226	1.47129	0.359448
1390662_at	AW435169	Ab2-427	LOC500084	2.37847	0.00343595	1.95672	0.00320398	2.50828	0.00131315	2.06888	0.00152241
1382981_at	AI138017	Abelson helper integration site 1	Ahi1	0.348988	0.0221865	0.529039	0.0762085	0.419734	0.111265	0.704586	0.260834
1379594_at	AW524408	Abelson helper integration site 1	Ahi1	0.936953	0.670591	0.994522	0.95624	1.00454	0.257994	1.01677	0.859704
1372976_at	BI294842	abhydrolase domain containing 14A	Abhd14a	0.995107	0.970287	0.955269	0.528355	0.737527	0.959569	0.957709	0.531743
1377900_at	BF409560	abhydrolase domain containing 14b	Abhd14b	0.939187	0.130376	0.464073	0.011594	0.622779	0.326209	0.364758	0.0212132
1388988_at	AI175070	abhydrolase domain containing 14b	Abhd14b	0.659963	0.800158	0.38884	0.00149004	0.556679	0.123889	0.419603	0.014687
1390455_at	AI013474	abhydrolase domain containing 2 (predicted)	Abhd2_predicted	6.33782	0.0245352	20.3768	1.81388e-05	1.15923	0.656331	7.09264	0.00086378
1382137_at	BG662490	abhydrolase domain containing 3 (predicted)	Abhd3_predicted	0.961764	0.825336	0.500338	0.000583571	0.899545	0.344906	0.571441	0.0364183
1393028_at	BM383152	Abhydrolase domain containing 4 (predicted)	Abhd4_predicted	0.669386	0.00953215	1.15207	0.517882	0.398251	0.00155997	1.63239	0.0978732
1399019_at	AI407868	abhydrolase domain containing 4 (predicted)	Abhd4_predicted	0.297495	0.166359	1.32805	0.112222	0.39737	0.0234843	1.67283	0.066843
1390155_at	AA924793	abhydrolase domain containing 6	Abhd6	1.31485	0.0616784	1.34353	0.0107466	0.875303	0.277437	1.21019	0.0131787
1380332_at	BF411794	Abhydrolase domain containing 6	Abhd6	1.93419	0.0839864	0.539182	0.105415	1.11023	0.701937	0.421798	0.0671666
1393197_at	BG376055	abhydrolase domain containing 8 (predicted)	Abhd8_predicted	0.969948	0.749377	0.553317	0.0309532	0.996652	0.926326	0.55395	0.014389
1367958_at	NM_024397	abl-interactor 1	Abi1	1.05379	0.498044	1.29151	0.228935	1.47852	0.0714721	1.55936	0.066355
1383147_at	AW526373	Abl-interactor 2	Abi2	0.582642	0.0392543	0.166943	1.84465e-05	0.770091	0.22377	0.352272	0.0295315
1393031_at	BI297075	ABO blood group (transferase A, alpha 1-3-N-acetylgalactosaminyltransferase; transferase B, alpha 1-3-galactosyltransferase)	Abo	0.753323	0.104691	0.89768	0.35273	0.753397	0.0966462	0.899185	0.358629
1375036_at	AI172146	Ac1158	LOC302898	0.72244	0.000483675	0.597341	0.0123797	0.779971	0.0438726	0.801881	0.322024
1394397_at	BF522734	Ac1158	LOC302898	0.72354	0.0433388	1.21467	0.43693	0.413463	0.00376309	1.17834	0.49773
1385212_at	AI603192	Ac1158	LOC302898	0.637409	0.567553	0.461597	0.0961343	0.945236	0.740126	0.987006	0.962406
1383607_at	BG377487	Ac1158	LOC302898	1.07566	0.656736	0.345783	0.000156838	1.13382	0.750979	0.766321	0.244611
1397100_at	BF403835	Ac1258	LOC361230	1.05496	0.257693	1.91762	0.0563371	1.00193	0.846343	1.00111	0.955183
1371405_at	BE109143	Ac2-193	---	0.442411	0.465893	0.617101	0.000135298	0.61881	0.112992	0.736413	0.0109932
1385889_at	AA893212	Ac2-193	---	0.987738	0.992226	0.460508	0.0911688	0.999937	0.999691	0.453443	0.0812495
1368126_at	NM_023104	acetoacetyl-CoA synthetase	Aacs	1.36225	0.334839	0.749749	0.0798876	1.38617	0.988367	0.573221	0.0257337
1367763_at	D13921	acetyl-coenzyme A acetyltransferase 1	Acat1	0.470561	0.0022744	0.303159	0.000704049	0.588617	0.0164772	0.2286	0.00132529
1383416_at	AA899304	Acetyl-coenzyme A acetyltransferase 1	Acat1	0.321935	0.00985988	0.357838	0.00591191	0.390387	0.116683	0.344585	0.00334306
1376226_at	BG377636	Acetyl-Coenzyme A acetyltransferase 2	Acat2	0.737598	0.243053	0.838876	0.94398	0.709665	0.09138	0.91266	0.196231
1372462_at	AI412322	acetyl-Coenzyme A acetyltransferase 2	Acat2	0.913146	0.741737	1.2025	0.177804	0.837877	0.191521	0.970276	0.63663
1387783_a_at	NM_012489	acetyl-Coenzyme A acyltransferase 1 /// similar to 3-ketoacyl-CoA thiolase B, peroxisomal precursor (Beta-ketothiolase B) (predicted)	Acaa1 /// RGD1562373_predicted	0.966787	0.883328	0.619569	0.0481828	0.971572	0.889855	0.853153	0.0587506
1386880_at	NM_130433	acetyl-Coenzyme A acyltransferase 2 (mitochondrial 3-oxoacyl-Coenzyme A thiolase)	Acaa2	0.609683	0.424461	0.422476	0.105312	0.551343	0.0284998	0.361551	0.0361507
1370893_at	BI296153	acetyl-coenzyme A carboxylase alpha	Acaca	0.62949	0.160889	1.00031	0.721069	1.16866	0.460889	0.998016	0.750024
1367735_at	NM_012819	acetyl-Coenzyme A dehydrogenase, long-chain	Acadl	0.907603	0.996701	1.55503	0.043702	0.630761	0.232109	1.40519	0.0566105
1367702_at	NM_016986	acetyl-Coenzyme A dehydrogenase, medium chain	Acadm	0.307192	0.011179	0.444313	0.0315189	0.865355	0.681154	0.521416	0.040928
1367828_at	NM_022512	acetyl-Coenzyme A dehydrogenase, short chain	Acads	0.466068	0.0532088	0.621165	0.197506	0.483387	0.0807213	0.695041	0.29115
1372228_at	BF420745	acetylserotonin O-methyltransferase-like (predicted)	Asmtl_predicted	0.562377	0.305147	0.719443	0.15139	0.952601	0.618725	0.571748	0.392097
1376037_at	BF283385	achalasia, adrenocortical insufficiency, alacrimia (Allgrove, triple-A) (predicted)	Aaas_predicted	0.919953	0.965467	1.00927	0.932638	1.00117	0.995372	1.5935	0.0258466
1398938_at	AI170780	acid phosphatase 1, soluble	Acp1	0.70262	0.0102842	1.51625	0.00135505	0.674133	0.0254466	1.55297	0.027169
1387840_at	NM_021262	acid phosphatase 1, soluble	Acp1	0.708459	0.634512	1.31004	0.0191563	0.603574	0.545227	1.08011	0.68547
1367906_at	NM_016988	acid phosphatase 2, lysosomal	Acp2	0.628775	0.0861029	0.916232	0.0521755	0.486381	0.0659228	0.754915	0.0467883
1373732_at	BM386224	acid phosphatase 6, lysophosphatidic	Acp6	0.927083	0.668235	0.730463	0.00950507	0.928405	0.746942	0.745323	0.000224354
1389229_at	AI113146	acid phosphatase-like 2	Acpl2	0.581783	0.247709	0.515847	0.0332418	0.655415	0.18131	0.702107	0.0344528
1369063_at	NM_012903	acidic (leucine-rich) nuclear phosphoprotein 32 family, member A	Anp32a	0.551433	0.211194	2.05037	0.272636	0.513824	0.0309273	1.71434	0.462138
1372620_at	AI008642	acidic (leucine-rich) nuclear phosphoprotein 32 family, member E	Anp32e	0.840649	0.140985	1.88276	0.00272674	0.912918	0.541456	1.66188	0.00450407
1371873_at	AA850735	Acidic (leucine-rich) nuclear phosphoprotein 32 family, member E	Anp32e	0.611879	0.413237	0.456723	0.00216082	0.66232	0.108701	0.580436	0.00974402
1386915_at	NM_131911	acidic nuclear phosphoprotein 32 family, member B	Anp32b	0.607223	0.611554	2.05758	0.00592942	0.596424	0.0217593	1.72996	0.000665329
1367560_at	NM_022402	acidic ribosomal phosphoprotein P0	Arbp	0.891707	0.57384	1.15071	0.073244	0.723924	0.053048	0.987339	0.879345
1389363_at	AA997430	acireductone dioxygenase 1	Adi1	0.510204	0.251303	0.541051	0.0126467	0.614376	0.0103219	0.562408	0.0109963
1372847_at	AW524458	ACN9 homolog (S. cerevisiae)	Acn9	0.558052	0.449356	1.51188	0.389802	0.679899	0.261696	1.29031	0.180321
1386916_at	NM_017321	aconitase 1	Aco1	0.22777	0.00874817	0.41314	6.46399e-05	0.377462	0.0186522	0.557832	0.0379976
1367589_at	NM_024398	aconitase 2, mitochondrial	Aco2	0.445691	0.0896995	0.613631	0.000632813	0.53248	0.00529413	0.565363	0.00416188
1378945_at	AI638990	Aconitase 2, mitochondrial	Aco2	1.47081	0.284842	1.31259	0.187844	1.10835	0.863032	1.49691	0.0600829
1396474_at	AW254078	Acrosin binding protein	Acrbp	0.943968	0.934157	0.823953	0.488358	1.00182	0.995074	0.774256	0.717118
1370856_at	AA800705	actin alpha cardiac 1	Actc1	1.0046	0.374759	1.01709	0.995189	1.00787	0.342689	0.998367	0.84591
1398779_at	NM_031146	actin related protein 2/3 complex, subunit 1A	Arpc1a	0.934531	0.965536	0.742675	0.0215168	0.886192	0.253687	0.787402	0.010942
1386925_at	NM_019289	actin related protein 2/3 complex, subunit 1B	Arpc1b	1.01436	0.399271	1.10988	0.374704	0.804492	0.0737686	1.01621	0.497657
1371511_at	AI009775	actin related protein 2/3 complex, subunit 2 (predicted)	Arpc2_predicted	0.998262	0.253548	1.18128	0.0138089	0.871509	0.835494	1.17354	0.075314
1371977_at	BG381477	actin related protein 2/3 complex, subunit 3 (predicted)	Arpc3_predicted	0.870838	0.946432	0.829266	0.193077	0.834403	0.0897411	0.769284	0.0176435
1372577_at	AI411582	actin related protein 2/3 complex, subunit 4 (predicted)	Arpc4_predicted	0.844713	0.782728	1.04266	0.121783	0.793489	0.0160763	0.977394	0.187093
1390022_at	AA946538	actin related protein 2/3 complex, subunit 5	Arpc5	1.70802	3.75603e-05	1.01309	0.354601	1.37301	0.0256589	0.982023	0.732638
1371457_at	BI291468	Actin related protein 2/3 complex, subunit 5-like	Arpc5l	0.53403	0.0923361	0.924252	0.65392	0.440001	0.0617296	1.35301	0.526913
1398835_at	NM_031144	actin, beta	Actb	1.38092	0.212843	1.95315	0.00634922	1.28184	0.953842	1.85705	0.0796896
1398836_s_at	NM_031144	actin, beta	Actb	1.42343	0.467786	2.06616	0.0183815	1.22315	0.317067	2.01991	0.219204
1371327_a_at	BG666668	actin, gamma, cytoplasmic 1 /// similar to Actin, cytoplasmic 2 (Gamma-actin)	Actg1 /// LOC295810	1.72548	0.0132779	4.40403	2.46495e-05	1.24668	0.0973195	3.07783	0.000194556
1384581_at	BI850151	actin, gamma, cytoplasmic 1 /// similar to Actin, cytoplasmic 2 (Gamma-actin) /// similar to put. type 5 nonmuscle actin (predicted)	Actg1 /// LOC295810 /// RGD1563410_predicted	1.32207	0.789799	2.52889	0.0125763	1.00044	0.993528	2.17833	0.000761832
1367962_at	NM_133424	actinin alpha 3	Actn3	0.953634	0.827263	0.918635	0.510331	0.955612	0.835646	0.943917	0.48395
1369942_at	NM_031675	actinin alpha 4	Actn4	1.21903	0.0791939	2.84896	5.01162e-05	0.566358	0.848249	2.41205	0.010449
1389189_at	BF555956	actinin, alpha 1	Actn1	2.57246	0.00487825	2.00355	0.00554157	2.19057	0.00153756	1.4401	0.00159007
1396539_at	BE119221	Actinin, alpha 1	Actn1	1.59265	0.0108821	1.26421	0.0522838	1.18226	0.120858	1.21274	0.0801343
1398294_at	NM_031005	actinin, alpha 1	Actn1	3.66784	0.0982759	5.42693	0.0119496	5.16448	0.309205	2.16655	0.0346011
1373849_at	AI102978	actin-like 6A	Actl6a	0.715759	0.389322	0.970873	0.641399	0.892299	0.428829	0.970162	0.258089
1379781_at	BE120508	Actin-like 6A	Actl6a	1.11074	0.63032	0.886494	0.843758	0.800824	0.370391	0.993825	0.969708
1382608_at	BI281712	actin-like 6B (predicted)	Actl6b_predicted	0.898168	0.61003	0.439296	0.0463891	0.923801	0.487422	0.495595	0.0496792
1382294_at	AI576111	Activated leukocyte cell adhesion molecule	Alcam	3.01462	0.0014569	0.884807	0.502403	3.06493	0.00113894	0.889938	0.132153
1370043_at	NM_031753	activated leukocyte cell adhesion molecule	Alcam	2.02884	0.00574006	0.947465	0.672824	2.54807	0.000618102	0.939166	0.125205
1375263_at	BI296498	Activated leukocyte cell adhesion molecule	Alcam	0.615381	0.724917	1.16581	0.684082	1.24546	0.126335	0.75386	0.00129286
1395981_at	AW919934	activating signal cointegrator 1 complex subunit 3 (predicted)	Ascc3_predicted	1.19673	0.110529	0.989561	0.760939	1.06506	0.265933	0.946089	0.967829
1388354_at	BE349703	activating signal cointegrator 1 complex subunit 3-like 1	Ascc3l1	0.950603	0.138791	1.36744	0.109319	0.931943	0.519635	1.40463	0.00782126
1389623_at	AA849092	activating transcription factor 1	Atf1	1.0203	0.336107	1.34681	0.0202166	0.966206	0.255917	1.44256	0.0007062
1369472_a_at	NM_031018	activating transcription factor 2	Atf2	0.994684	0.989544	3.24054	0.0336826	1.00635	0.704475	1.98347	0.131455
1369268_at	NM_012912	activating transcription factor 3	Atf3	15.7344	0.00344112	53.8906	0.0037014	23.2729	0.00258025	26.5928	0.00162677
1367624_at	NM_024403	activating transcription factor 4	Atf4	1.33196	0.0637336	2.32458	0.000313667	1.07245	0.410003	2.16046	0.00348026
1372601_at	BM391471	activating transcription factor 5	Atf5	0.69354	0.089047	1.11837	0.651957	0.69952	0.00581039	1.09091	0.381612
1384957_at	AI059385	activating transcription factor 6 (predicted)	Atf6_predicted	0.83394	0.975605	1.84575	0.226852	0.97849	0.998533	0.997745	0.990318
1384498_at	BI274185	Activating transcription factor 7 (predicted)	Atf7_predicted	1.14233	0.777789	0.90151	0.490753	0.720533	0.0505571	1.02655	0.848046
1382380_at	AI176317	Activating transcription factor 7 (predicted)	Atf7_predicted	1.00069	0.996187	0.940529	0.764718	0.99943	0.279105	0.957242	0.841329
1382070_at	AA819758	activating transcription factor 7 interacting protein (predicted)	Atf7ip_predicted	2.04096	0.00591091	1.56447	0.00731758	1.40637	0.0540721	1.16219	0.0276928
1388601_at	AI598410	activator of basal transcription 1	Abt1	0.36483	0.0105677	1.22156	0.208767	0.51768	0.184341	1.06038	0.668989
1373215_at	BI282699	active BCR-related gene (predicted)	Abr_predicted	0.740295	0.997551	0.667567	0.00635812	0.998906	0.99938	0.64618	0.0366277
1381220_at	BM383968	activin receptor IIA	Acvr2a	1.28023	0.109325	2.24851	0.0120277	0.582826	0.444558	2.1237	0.00818169
1376125_at	BI289112	Activity and neurotransmitter-induced early gene 11 (ania-11) mRNA, 3' UTR	---	1.65115	0.0566833	1.72948	0.0383441	2.00224	0.0257431	1.00792	0.963567
1383306_at	AI013468	Activity and neurotransmitter-induced early gene 2 (ania-2) mRNA, 3'UTR	---	0.731871	0.0656353	0.893873	0.793601	0.639391	0.0325888	0.902129	0.0663096
1389346_at	BI274136	activity-dependent neuroprotective protein	Adnp	0.46413	0.026145	0.235213	0.0155165	0.540301	0.0246646	0.394683	0.00450507
1389088_at	AI600029	activity-dependent neuroprotective protein	Adnp	0.988945	0.912526	0.888735	0.10271	0.8251	0.0780993	0.884521	0.19268
1397389_at	BF398664	Activity-dependent neuroprotective protein	Adnp	0.978584	0.934169	1.02342	0.0658953	0.674314	0.183591	0.840409	0.106317
1370939_at	D90109	acyl-CoA synthetase long-chain family member 1	Acsl1	0.779158	0.507753	0.613254	0.0017171	1.4507	0.00509508	1.22437	0.107799
1388153_at	BI277523	acyl-CoA synthetase long-chain family member 1	Acsl1	0.972018	0.85779	0.981123	0.392961	1.75302	0.264033	1.46219	0.68011
1368177_at	NM_057107	acyl-CoA synthetase long-chain family member 3	Acsl3	0.783542	0.10839	1.91668	0.00518621	0.509841	0.0378998	1.34071	0.127249
1387101_at	NM_053623	acyl-CoA synthetase long-chain family member 4	Acsl4	1.53805	0.275189	0.843968	0.163507	1.38824	0.339711	0.885426	0.202668
1386926_at	NM_053607	acyl-CoA synthetase long-chain family member 5	Acsl5	1.66873	0.010941	2.35407	0.000171763	1.41318	0.041802	2.16703	0.000241186
1368182_at	NM_130739	acyl-CoA synthetase long-chain family member 6	Acsl6	0.67873	0.176948	0.366699	0.0128075	1.0988	0.470935	0.49809	0.0397612
1370313_at	D88891	acyl-CoA thioesterase 7	Acot7	0.833733	0.333148	0.845891	0.734381	0.886938	0.0370733	0.89546	0.986814
1368206_at	NM_130756	acyl-CoA thioesterase 8	Acot8	0.742302	0.321424	1.20831	0.220555	0.50625	0.000254836	1.30632	0.0126557
1372552_at	AI102273	acyl-Coenzyme A binding domain containing 3	Acbd3	0.814049	0.0547847	0.961711	0.586794	0.834995	0.00565983	0.856327	0.0832031
1394734_at	BE120590	acyl-Coenzyme A binding domain containing 3	Acbd3	0.836445	0.276873	1.67499	0.0391731	0.781999	0.254979	1.75512	0.0617276
1373347_at	BF419134	acyl-Coenzyme A binding domain containing 3	Acbd3	0.944254	0.778464	0.913419	0.596706	1.1057	0.873322	1.35356	0.132746
1395913_at	AI136400	Acyl-Coenzyme A binding domain containing 4	Acbd4	1.23557	0.161931	1.06699	0.350265	1.25749	0.174589	1.21036	0.439259
1373507_at	AI232810	acyl-Coenzyme A binding domain containing 5	Acbd5	0.66178	0.0306887	0.369438	0.000457091	0.748711	0.227498	0.504981	0.00385404
1374555_at	AI501425	acyl-Coenzyme A binding domain containing 6	Acbd6	1.22178	0.513309	1.66646	0.01086	0.822994	0.416058	1.38437	0.217775
1390789_at	BI296347	acyl-Coenzyme A dehydrogenase family, member 11 (predicted)	Acad11_predicted	0.473645	0.231247	0.715318	0.0560341	0.373911	0.0181823	0.796902	0.589689
1373389_at	BM391807	acyl-Coenzyme A dehydrogenase family, member 9	Acad9	0.516092	0.00170334	0.639484	0.0049881	0.719123	0.103373	0.861195	0.229964
1367897_at	NM_012891	acyl-Coenzyme A dehydrogenase, very long chain	Acadvl	0.696149	0.54599	0.864646	0.298907	0.940649	0.207952	0.95784	0.723707
1367680_at	NM_017340	acyl-Coenzyme A oxidase 1, palmitoyl	Acox1	0.695568	0.149788	0.85196	0.0183391	0.629883	0.0028875	0.958653	0.181403
1377887_at	AI013044	Acyl-Coenzyme A oxidase 3, pristanoyl	Acox3	1.14896	0.40193	0.633735	0.0819166	1.31691	0.293989	0.783639	0.407277
1398815_at	NM_012500	acylpeptide hydrolase	Apeh	0.627958	0.450833	0.416466	0.00253641	0.639149	0.129889	0.487167	0.195821
1373448_at	AI413052	acylphosphatase 1, erythrocyte (common) type (predicted)	Acyp1_predicted	0.874101	0.450981	0.904844	0.266182	0.854392	0.305712	1.3957	0.034454
1371923_at	BG380281	acyltransferase like 2 (predicted)	Aytl2_predicted	0.705935	0.721581	0.118541	0.0059269	0.810925	0.898482	0.232447	0.00100344
1367872_at	NM_017277	adaptor protein complex AP-1, beta 1 subunit	Ap1b1	1.05157	0.99544	0.923207	0.146545	0.910408	0.630416	0.882986	0.112283
1374305_at	AI408613	adaptor protein complex AP-1, gamma 2 subunit (predicted)	Ap1g2_predicted	0.938895	0.880561	0.700952	0.336861	1.34333	0.364026	0.736173	0.842396
1371858_at	BM385719	adaptor protein complex AP-1, sigma 1 (predicted)	Ap1s1_predicted	0.57232	0.0198485	1.1189	0.320141	0.616401	0.00179314	0.824481	0.855386
1377769_at	AA955775	adaptor protein complex AP-1, sigma 1 (predicted)	Ap1s1_predicted	0.569536	0.98855	0.917518	0.840742	0.566516	0.0535811	0.768808	0.110404
1371493_at	BI285640	Adaptor protein complex AP-2, alpha 2 subunit	Ap2a2	0.650254	0.453823	0.509483	0.0585155	0.469167	0.0697355	0.452581	0.010519
1369982_at	NM_031008	adaptor protein complex AP-2, alpha 2 subunit	Ap2a2	0.709987	0.486708	1.09251	0.0308601	0.51338	0.0173536	0.893002	0.311967
1373816_at	BM383443	adaptor-related protein complex 1, gamma 1 subunit	Ap1g1	1.10164	0.637953	1.77942	0.00794574	1.3674	0.0663743	1.38406	0.0302863
1384187_at	BF551686	adaptor-related protein complex 1, sigma 2 subunit (predicted)	Ap1s2_predicted	0.600742	0.0503311	0.527999	0.01828	0.556692	0.00516796	0.640733	0.0711139
1398616_at	AI045228	adaptor-related protein complex 1, sigma 2 subunit (predicted)	Ap1s2_predicted	0.53937	0.0569697	0.579736	0.00773061	0.996021	0.724384	0.808729	0.122994
1396217_at	BF542447	Adaptor-related protein complex 1, sigma 2 subunit (predicted)	Ap1s2_predicted	0.517414	0.129257	0.312218	0.00798033	0.484961	0.0310724	0.201471	0.0598485
1384703_at	AI228602	Adaptor-related protein complex 1, sigma 2 subunit (predicted)	Ap1s2_predicted	0.933688	0.731635	1.0227	0.994823	0.607158	0.182999	0.800158	0.287547
1367704_at	NM_080583	adaptor-related protein complex 2, beta 1 subunit	Ap2b1	1.00616	0.128631	0.692205	0.00383988	1.04139	0.430952	0.663859	0.0511381
1398765_at	NM_053837	adaptor-related protein complex 2, mu 1 subunit	Ap2m1	1.07793	0.344566	1.05577	0.0517055	1.02516	0.663509	1.17591	0.0269203
1386877_at	NM_022952	adaptor-related protein complex 2, sigma 1 subunit	Ap2s1	0.581564	0.0859608	0.741158	0.252392	0.61601	0.0813825	0.949827	0.271006
1373888_at	BE113312	adaptor-related protein complex 3, beta 1 subunit (predicted)	Ap3b1_predicted	0.898904	0.726803	0.884474	0.0450498	1.21386	0.854054	0.834929	0.796667
1393359_at	AW534487	adaptor-related protein complex 3, beta 2 subunit (predicted)	Ap3b2_predicted	1.22433	0.0210412	0.53074	0.0191769	1.65352	0.0691126	0.769648	0.130678
1367549_a_at	BI282757	adaptor-related protein complex 3, delta 1 subunit	Ap3d1	0.732811	0.0124598	1.24739	0.140177	0.968926	0.210143	1.14564	0.00756915
1393562_at	BF564312	adaptor-related protein complex 3, mu 1 subunit	Ap3m1	0.554763	0.0290967	0.382366	0.0101657	0.658348	0.023625	0.473933	0.045842
1368062_at	NM_133593	adaptor-related protein complex 3, mu 1 subunit	Ap3m1	0.547047	0.181324	0.447421	0.0055923	0.622159	0.0027063	0.631554	0.101738
1368246_at	NM_133305	adaptor-related protein complex 3, mu 2 subunit	Ap3m2	2.1907	0.00901325	1.0032	0.986518	2.11318	0.00119363	1.01715	0.930074
1373024_at	BI296511	adaptor-related protein complex 3, sigma 1 subunit (predicted)	Ap3s1_predicted	0.731451	0.510358	0.672028	0.00757152	0.801263	0.964147	0.693909	0.137784
1372045_at	BE112941	adaptor-related protein complex AP-1, mu subunit 1	Ap1m1	0.806357	0.188247	1.31961	0.0228538	1.06494	0.324494	1.29953	0.00630151
1376874_a_at	BF560100	adaptor-related protein complex AP-4, beta 1 (predicted)	Ap4b1_predicted	0.94101	0.401096	1.57827	0.01503	1.14804	0.107877	1.1919	0.295476
1372628_at	AA800277	adaptor-related protein complex AP-4, sigma 1 (predicted)	Ap4s1_predicted	0.787233	0.274322	0.893173	0.155057	0.648503	0.0109476	0.843157	0.0167155
1396251_at	BF388318	Adaptor-related protein complex AP-4, sigma 1 (predicted)	Ap4s1_predicted	0.985212	0.995036	4.62054	0.0279151	1.00001	0.999976	4.03418	0.0477792
1388487_at	AI600061	adducin 1 (alpha)	Add1	0.692256	0.201824	0.897841	0.154071	0.584174	0.0181628	0.86598	0.384852
1394421_at	BF282980	Adducin 1 (alpha)	Add1	1.00038	0.983538	1.30014	0.0935389	1.00104	0.884931	1.34987	0.0347636
1371244_at	AI412934	adenine phosphoribosyl transferase (predicted)	Aprt_predicted	0.644925	0.452059	1.23505	0.941074	0.4982	0.0243638	1.01153	0.782834
1387837_at	NM_012499	adenomatosis polyposis coli	Apc	0.882693	0.794176	0.87	0.0381253	0.505176	0.0351299	0.579262	0.0663126
1387721_at	NM_017155	adenosine A1 receptor	Adora1	0.927733	0.811975	0.976338	0.905221	0.785845	0.741639	0.8374	0.507708
1387395_at	NM_017161	adenosine A2B receptor	Adora2b	1.02668	0.584188	1.56436	0.271064	1.05744	0.0509231	1.14938	0.326158
1368973_at	NM_031006	adenosine deaminase, RNA-specific	Adar	1.01753	0.0461756	1.07832	0.241995	1.02213	0.241951	1.43616	0.137638
1394528_at	BF405166	Adenosine deaminase, RNA-specific	Adar	0.804524	0.178222	1.0001	0.297756	1.3124	0.0968629	1.00231	0.972521
1369630_at	BF283118	adenosine kinase	Adk	0.878824	0.187442	0.785836	0.0144639	0.874155	0.0984103	0.743809	0.00298279
1369629_at	U90340	adenosine kinase	Adk	0.906948	0.928838	0.506273	0.0167622	0.99756	0.99414	0.508979	0.0362395
1398306_at	J02811	adenosine monophosphate deaminase 1 (isoform M)	Ampd1	2.09373	0.0710995	1.08217	0.0865073	3.01261	0.0492151	1.06899	0.208848
1368342_at	NM_031544	adenosine monophosphate deaminase 3	Ampd3	13.268	2.9498e-05	5.94929	0.00637138	10.0795	0.0328641	1.84066	0.144046
1376549_at	BF394116	Adenylate cyclase 10 (soluble)	Adcy10	0.641894	0.810493	1.16669	0.853067	1.24955	0.740007	0.915489	0.77824
1367644_at	L01115	adenylate cyclase 6	Adcy6	0.475115	0.0201669	0.548506	0.0114805	0.363113	0.127571	0.634535	0.177471
1368892_at	NM_016989	adenylate cyclase activating polypeptide 1	Adcyap1	1.15018	0.674886	1.63277	0.0832438	1.00323	0.832664	0.997466	0.885482
1386954_at	NM_030986	adenylate kinase 2	Ak2	0.880368	0.646234	0.996866	0.546966	0.508965	0.0356199	1.0448	0.684065
1398349_at	AI411497	adenylate kinase 2	Ak2	0.924963	0.88396	1.14523	0.0357474	0.877646	0.345835	1.22861	0.0551037
1368095_at	NM_013218	adenylate kinase 3	Ak3	1.15057	0.0656901	0.819001	0.117269	0.944673	0.180041	0.81371	0.0347654
1371824_at	AA891949	adenylate kinase 3-like 1	Ak3l1	0.470415	0.657318	34.0188	0.0055063	0.829767	0.631358	22.2203	0.00208399
1376091_at	AA963616	adenylosuccinate lyase (predicted)	Adsl_predicted	0.896404	0.226064	1.84897	0.00145119	0.852274	0.753691	1.40499	0.00862388
1399050_at	AI232106	adenylosuccinate synthetase, non muscle (predicted)	Adss_predicted	1.07669	0.420064	0.93566	0.132972	1.04049	0.582939	1.02907	0.150186
1375587_at	AI412674	Adenylosuccinate synthetase, non muscle (predicted)	Adss_predicted	1.08605	0.485576	1.00549	0.884865	1.20603	0.73703	1.00044	0.994351
1373345_at	AW523747	adhesion molecule with Ig like domain 2	Amigo2	0.910992	0.690753	0.558024	0.0235429	0.658416	0.0257424	0.417804	0.000500811
1367868_at	NM_031708	adhesion regulating molecule 1	Adrm1	0.698713	0.482225	1.3595	0.00515374	0.647685	0.0344433	1.34633	0.019425
1388373_at	BI289063	adiponectin receptor 1	Adipor1	0.936705	0.878742	0.821271	0.253744	0.861552	0.322637	0.662195	0.0128537
1371598_at	BI278598	Adiponectin receptor 2	Adipor2	0.919233	0.749717	1.00315	0.723247	0.646571	0.226019	0.890449	0.0191058
1390549_at	AA859796	adiponectin receptor 2	Adipor2	1.0684	0.87043	0.921412	0.38575	0.61144	0.0381866	0.97016	0.859641
1390383_at	BI285616	adipose differentiation related protein	Adfp	1.40105	0.122049	1.60964	0.0328429	0.756958	0.261195	1.22666	0.0897293
1390850_at	AA874941	Adipose differentiation related protein	Adfp	1.51962	0.220632	1.59781	0.00159733	0.814266	0.0394817	1.23288	0.0679638
1374958_at	AA819640	ADP-dependent glucokinase	Adpgk	0.400433	0.0182879	1.18934	0.641368	0.659826	0.0403675	0.775238	0.0423921
1377952_at	BE102146	ADP-dependent glucokinase	Adpgk	0.515071	0.0541438	1.70296	0.901402	0.408184	0.0672333	1.17624	0.909742
1395163_at	BI296281	ADP-dependent glucokinase	Adpgk	2.1374	0.329108	1.15407	0.10181	2.49681	0.0055997	0.613902	0.0756204
1370505_at	M86341	ADP-ribosylarginine hydrolase	Adprh	0.806627	0.926097	0.74156	0.0375399	0.355593	0.363403	0.524841	0.00569623
1395386_at	BF411881	ADP-ribosylation factor 1	Arf1	0.825011	0.255698	0.78771	0.768964	0.821892	0.223803	0.974059	0.822693
1395241_at	BF389686	ADP-ribosylation factor 1	Arf1	0.781441	0.304232	1.44016	0.193553	1.04238	0.295714	1.05279	0.825209
1367459_at	BE329198	ADP-ribosylation factor 1	Arf1	0.759866	0.641982	0.991596	0.452555	0.691303	0.285256	1.01327	0.568402
1398817_at	NM_022518	ADP-ribosylation factor 1	Arf1	0.686575	0.953179	0.733059	0.222163	0.467496	0.405026	0.542819	0.114105
1388813_at	BE112160	ADP-ribosylation factor 2	Arf2	1.20389	0.961056	2.58909	0.0485234	1.90278	0.280541	2.43699	1.22049e-05
1388997_at	BG380819	ADP-ribosylation factor 3	Arf3	1.10448	0.34534	0.915904	0.0259519	1.18685	0.0349932	1.00804	0.231432
1387447_at	NM_080904	ADP-ribosylation factor 3	Arf3	1.07482	0.754042	1.03638	0.220802	1.37906	0.069082	0.994645	0.83488
1395162_at	BI301804	ADP-ribosylation factor 3	Arf3	0.999691	0.96098	0.929864	0.750786	0.994126	0.307799	1.17656	0.806312
1398758_at	NM_024151	ADP-ribosylation factor 4	Arf4	0.78335	0.670787	0.937871	0.323137	0.853627	0.676551	0.957041	0.516319
1367748_at	NM_024149	ADP-ribosylation factor 5	Arf5	0.907617	0.0287086	0.73633	0.0249653	0.799511	0.0496602	0.811301	0.118753
1369998_at	NM_024152	ADP-ribosylation factor 6	Arf6	1.97555	0.117557	3.0368	0.000840498	1.27381	0.627649	1.92193	0.00721408
1376268_at	BM387435	ADP-ribosylation factor 6	Arf6	1.28426	0.202258	1.32837	0.143398	1.0551	0.265748	1.18902	0.238651
1389492_at	AA818820	ADP-ribosylation factor GTPase activating protein 1	Arfgap1	0.522563	0.00439053	0.734687	0.222793	0.753056	0.0372047	0.84414	0.240893
1376123_at	BM384190	ADP-ribosylation factor GTPase activating protein 1	Arfgap1	0.627311	0.14581	0.881233	0.424117	0.375424	0.0559051	0.944618	0.182111
1370364_at	U35776	ADP-ribosylation factor GTPase activating protein 1	Arfgap1	0.446506	0.168985	0.803695	0.18761	0.457511	0.00456275	0.476033	0.0299328
1372130_at	AI408249	ADP-ribosylation factor guanine nucleotide-exchange factor 1(brefeldin A-inhibited) (predicted)	Arfgef1_predicted	1.10253	0.164469	0.911848	0.563129	1.13857	0.112853	1.392	0.00258006
1373591_at	BG375435	ADP-ribosylation factor interacting protein 2	Arfip2	0.60795	0.0129802	1.19107	0.0400036	0.5776	0.0852024	0.65989	0.126082
1370223_at	AI170798	ADP-ribosylation factor related protein 1	Arfrp1	0.811708	0.705612	1.81641	0.00606785	0.859029	0.198274	1.59408	0.0458333
1371690_at	AA849825	ADP-ribosylation factor-like 1	Arl1	0.68224	0.384193	0.872078	0.0342012	0.682265	0.0121329	0.724523	0.00769153
1387358_at	NM_022385	ADP-ribosylation factor-like 1	Arl1	0.586399	0.70784	1.74677	0.13241	0.589146	0.197232	1.33522	0.396455
1368166_at	NM_031711	ADP-ribosylation factor-like 2	Arl2	1.39235	0.608478	0.943137	0.974384	1.10966	0.291205	1.78032	0.0414721
1383813_at	BF567478	ADP-ribosylation factor-like 2 binding protein	Arl2bp	0.811383	0.164215	1.06537	0.131409	0.802253	0.162569	0.993479	0.994113
1389941_at	BE109130	ADP-ribosylation factor-like 2 binding protein	Arl2bp	0.789299	0.17941	0.900019	0.714352	0.682777	0.0467006	0.848084	0.166374
1367747_at	NM_022700	ADP-ribosylation factor-like 3	Arl3	0.709299	0.62597	0.806897	0.149669	0.890828	0.667135	1.02617	0.831401
1367960_at	NM_019186	ADP-ribosylation factor-like 4A	Arl4a	3.23625	0.000951113	4.42854	0.000493147	2.03729	0.000717766	3.24662	0.0134084
1369729_at	NM_053979	ADP-ribosylation factor-like 5A	Arl5a	3.74662	0.0446583	1.00643	0.955059	3.46337	0.0368206	0.94949	0.75458
1372557_at	AI409182	ADP-ribosylation factor-like 6 (predicted)	Arl6_predicted	0.576249	0.236571	0.897464	0.0325016	0.687205	0.108435	0.727445	0.00455598
1389967_at	AA892386	ADP-ribosylation factor-like 6 interacting protein 1	Arl6ip1	0.743125	0.704822	1.26829	0.13575	0.753404	0.457895	1.41957	0.0496631
1372085_at	AI237657	ADP-ribosylation factor-like 6 interacting protein 2	Arl6ip2	0.783126	0.300866	1.05353	0.361814	0.89978	0.231338	0.895114	0.183576
1371907_at	BE101624	ADP-ribosylation factor-like 6 interacting protein 4	Arl6ip4	0.534416	0.252718	1.08975	0.374882	0.373139	0.00876747	0.987587	0.896449
1374387_at	BG662580	ADP-ribosylation factor-like 6 interacting protein 5	Arl6ip5	1.635	0.032221	1.30746	0.709364	1.81018	0.0634405	1.27333	0.63558
1369319_at	NM_023972	ADP-ribosylation factor-like 6 interacting protein 5	Arl6ip5	1.57138	0.525848	1.18543	0.312504	1.89864	0.710527	0.749431	0.370632
1372634_at	AI009334	ADP-ribosylhydrolase like 2 (predicted)	Adprhl2_predicted	0.822644	0.136721	2.12922	0.00505352	0.695125	0.0522354	2.46196	0.00548724
1376810_at	AI103325	ADP-ribosyltransferase (NAD+; poly (ADP-ribose) polymerase)-like 1	Adprtl1	5.01211	0.000667596	2.13329	0.00504113	5.33413	0.000883186	2.04407	0.0231244
1387429_at	NM_012776	adrenergic receptor kinase, beta 1	Adrbk1	1.02086	0.802156	1.74994	0.116606	0.927555	0.432727	1.06395	0.052968
1370568_at	M58316	adrenergic receptor, alpha 2c	Adra2c	0.962053	0.0770986	0.996037	0.952342	0.950679	0.644441	0.996237	0.9874
1368780_at	NM_013108	adrenergic receptor, beta 3	Adrb3	1.00029	0.999258	0.816523	0.0481873	1.00093	0.998671	0.827061	0.0472883
1387219_at	NM_012715	adrenomedullin	Adm	33.758	0.019032	28.6834	0.0211665	14.9254	0.0211254	19.0596	0.0314584
1371996_at	AI232384	AE binding protein 2 (predicted)	Aebp2_predicted	0.582749	0.0197834	1.06673	0.243254	0.731309	0.00635815	1.03495	0.529212
1385344_at	AW526794	AE binding protein 2 (predicted)	Aebp2_predicted	0.757272	0.0376049	1.26487	0.588865	0.687294	0.0379711	1.25244	0.195024
1381994_at	BM385862	AE binding protein 2 (predicted)	Aebp2_predicted	0.66239	0.174167	0.197282	0.00421973	0.651718	0.119669	0.311273	0.0150935
1385728_at	BE108006	AE binding protein 2 (predicted)	Aebp2_predicted	0.619076	0.187794	0.559617	0.895296	0.996679	0.274273	0.532147	0.454362
1374618_at	BI279751	AF4/FMR2 family, member 1 (predicted)	Aff1_predicted	1.53785	0.0444552	1.32217	0.000956451	1.41801	0.170857	1.363	0.0149638
1397154_at	BF403248	AF4/FMR2 family, member 1 (predicted)	Aff1_predicted	1.03356	0.741433	1.41172	0.0700893	1.83405	0.0443991	2.23747	0.0109189
1381810_at	BF408753	AF4/FMR2 family, member 1 (predicted)	Aff1_predicted	1.00088	0.985469	0.953362	0.713514	1.00485	0.994312	0.943807	0.938043
1397386_at	AI715727	AF4/FMR2 family, member 4 (predicted)	Aff4_predicted	1.67595	0.182038	2.00112	0.0320895	0.855085	0.714552	1.8613	0.0766853
1378170_at	AI556957	AF4/FMR2 family, member 4 (predicted)	Aff4_predicted	1.05763	0.252347	1.37065	0.325188	0.965371	0.554156	1.6448	0.0394399
1394682_at	BF290030	AF4/FMR2 family, member 4 (predicted)	Aff4_predicted	1.00162	0.74857	1.08206	0.548992	0.998247	0.991708	1.35752	0.630248
1387392_at	NM_013217	afadin	Af6	1.23442	0.56099	2.15842	0.0399083	1.26468	0.395503	1.91819	0.0674826
1371266_at	X76456	afamin	Afm	0.99702	0.96835	1.00219	0.447867	1.00734	0.924229	1.00389	0.999063
1373660_at	BI280384	AFG3(ATPase family gene 3)-like 1 (yeast) (predicted)	Afg3l1_predicted	0.629905	0.0297507	0.725281	0.506049	0.928229	0.0464365	1.0038	0.369677
1375022_at	AI548730	AFG3(ATPase family gene 3)-like 2 (yeast)	Afg3l2	0.963246	0.817586	1.24943	0.0942736	0.692766	0.0574061	1.13824	0.0721661
1383395_at	AI028979	agmatine ureohydrolase (agmatinase)	Agmat	1.27334	0.090077	1.00078	0.187477	2.42791	0.00666687	1.00178	0.316695
1370307_at	M64780	agrin	Agrn	13.9585	0.000830141	8.5085	0.000898138	20.7147	5.39791e-05	7.05376	0.000586081
1371703_at	AI407114	AHNAK nucleoprotein (desmoyokin)	Ahnak	42.9364	0.0106047	2.68983	0.0861048	42.6058	0.0086885	8.24972	0.000565421
1371982_at	AI411960	AIP1	Aip1	0.808877	0.355294	0.919777	0.38542	0.696349	0.515711	0.852316	0.271776
1373122_at	BI284400	ajuba homolog (Xenopus laevis)	Jub	1.2085	0.559971	1.44819	0.247952	1.08518	0.634406	1.1278	0.701746
1372879_at	BI283873	AKT1 substrate 1 (proline-rich) (predicted)	Akt1s1_predicted	0.621451	0.0166905	0.998818	0.628055	0.692725	3.87946e-05	0.993285	0.949684
1388394_at	BI282672	alanyl-tRNA synthetase	Aars	1.21837	0.549532	2.08734	0.00221083	0.954216	0.232257	1.79955	0.0118301
1378476_at	BM390047	Alanyl-tRNA synthetase like (predicted)	Aarsl_predicted	1.36479	0.0547634	0.983682	0.904837	0.965402	0.283413	0.888572	0.388002
1371470_at	AI411895	Alcohol dehydrogenase 4 (class II), pi polypeptide	Adh4	0.623156	0.291158	0.404013	0.022864	0.599661	0.113023	0.786471	0.305975
1389548_at	BF288683	alcohol dehydrogenase, iron containing, 1	Adhfe1	1.01167	0.808595	0.272298	0.0307244	1.00103	0.891743	0.272712	0.0309343
1396383_at	BF412690	aldehyde dehydrogenase 3 family, member B1	Aldh3b1	0.710955	0.0401728	0.997224	0.743056	0.821599	0.0832226	0.99705	0.725888
1368003_at	NM_053896	aldehyde dehydrogenase family 1, subfamily A2	Aldh1a2	1.01445	0.951117	1.00117	0.985083	1.01119	0.957956	1.04288	0.619617
1368365_at	NM_031731	aldehyde dehydrogenase family 3, subfamily A2	Aldh3a2	0.302435	0.0997875	0.227892	5.38069e-05	0.15162	0.0127103	0.427299	0.00855225
1387344_at	AI407458	aldehyde dehydrogenase family 6, subfamily A1	Aldh6a1	0.399079	0.0513197	0.505693	0.00705781	0.699702	0.06443	0.445868	0.00313431
1381411_at	AI548328	Aldehyde dehydrogenase family 6, subfamily A1	Aldh6a1	0.962963	0.897227	1.36652	0.978162	0.490402	0.394283	0.964021	0.87055
1371567_at	AI411279	aldehyde dehydrogenase family 7, member A1	Aldh7a1	0.404487	0.197394	0.257933	0.000542949	0.472832	0.0149368	0.329871	0.000121757
1387867_at	BG672075	aldehyde dehydrogenase family 9, subfamily A1	Aldh9a1	0.45844	0.00399113	0.605405	0.0337306	0.483875	0.000333569	0.783942	0.094438
1398753_at	NM_031000	aldo-keto reductase family 1, member A1	Akr1a1	1.03899	0.421278	1.35043	0.0115052	1.00829	0.221393	1.30781	0.0528453
1367734_at	NM_012498	aldo-keto reductase family 1, member B4 (aldose reductase)	Akr1b4	0.637034	0.139445	1.60603	0.0163476	0.562571	0.0489664	1.32551	0.0454503
1370902_at	AI233740	aldo-keto reductase family 1, member B8	Akr1b8	1.11062	0.462485	60.3739	0.000356247	0.582599	0.25069	16.1515	0.000915459
1398612_at	BM383010	aldo-keto reductase family 1, member C12 (predicted)	Akr1c12_predicted	0.587699	1.2813e-05	1.37182	0.117196	0.540898	0.000566026	1.35568	0.0242613
1371997_at	BM390833	aldo-keto reductase family 1, member E1	Akr1e1	0.324241	0.0228107	0.326462	0.0191144	0.403838	0.0525709	0.241763	0.0225122
1367843_at	NM_134407	aldo-keto reductase family 7, member A2 (aflatoxin aldehyde reductase)	Akr7a2	0.448746	0.014201	0.445884	0.252145	0.446524	0.0260252	0.60488	0.0803447
1367617_at	NM_012495	aldolase A	Aldoa	0.765495	0.222802	1.34936	0.00866085	0.663803	0.0107784	1.27176	0.037173
1386998_at	NM_012497	aldolase C	Aldoc	0.999973	0.754209	1.88636	0.166588	3.82121	0.0530333	3.83753	0.0195002
1380448_at	AI112926	AlkB, alkylation repair homolog (E. coli) (predicted)	Alkbh_predicted	2.53304	0.0900473	3.133	0.0451844	2.72475	0.810083	2.94315	0.108067
1371772_at	AI410425	alkB, alkylation repair homolog 3 (E. coli)	Alkbh3	0.947122	0.783814	2.21534	0.00827929	0.779401	0.245439	1.88495	0.00662969
1378726_at	AI556485	AlkB, alkylation repair homolog 4 (E. coli) (predicted)	Alkbh4_predicted	1.51691	0.00771926	1.39809	0.249051	1.00313	0.982788	1.14234	0.11033
1375948_at	AI144919	AlkB, alkylation repair homolog 5 (E. coli) (predicted)	Alkbh5_predicted	1.26012	0.448552	2.58328	0.0563672	0.693235	0.714705	1.82714	0.0369093
1397525_at	AA848370	AlkB, alkylation repair homolog 5 (E. coli) (predicted)	Alkbh5_predicted	0.899071	0.69858	0.552887	0.22522	1.03854	0.254549	0.513086	0.169827
1397658_at	BF414555	AlkB, alkylation repair homolog 5 (E. coli) (predicted)	Alkbh5_predicted	0.984899	0.781084	1.0027	0.958403	0.846386	0.166062	0.765392	0.0668543
1370806_at	AF465614	all-trans-13,14-dihydroretinol saturase	Retsat	0.484337	0.738788	0.698253	0.129552	0.401142	0.118423	0.720173	0.222239
1368686_at	NM_012901	alpha 1 microglobulin/bikunin	Ambp	0.776973	0.345897	1.03133	0.841018	1.03728	0.783171	0.963534	0.571253
1373366_at	BM389337	alpha glucosidase 2 alpha neutral subunit (predicted)	Ganab_predicted	0.681171	0.714743	0.429059	0.00288898	0.875165	0.195595	0.461095	0.000912294
1389989_at	BF397805	alpha thalassemia/mental retardation syndrome X-linked homolog (human)	Atrx	0.790969	0.321795	0.878946	0.468214	0.900361	0.411889	0.967971	0.600279
1393798_at	BF398451	alpha thalassemia/mental retardation syndrome X-linked homolog (human)	Atrx	0.835217	0.525648	0.774434	0.17176	0.824872	0.490916	0.807672	0.124515
1385006_at	BF393029	alpha thalassemia/mental retardation syndrome X-linked homolog (human)	Atrx	0.966719	0.859744	0.593067	0.047906	1.2052	0.547759	0.643854	0.0260442
1367794_at	NM_012488	alpha-2-macroglobulin	A2m	1.00529	0.942991	0.966718	0.803299	1.29936	0.150998	1.1148	0.994784
1372533_at	AI175790	Alpha-mannosidase-like protein mRNA, 3' UTR	---	1.34672	0.0174277	1.43701	0.00485892	2.05957	0.00573785	1.51381	0.0342901
1367775_at	NM_012816	alpha-methylacyl-CoA racemase	Amacr	0.38199	0.0640575	0.406237	0.00691636	0.418452	0.0612573	0.742921	0.265678
1370838_s_at	BM387423	alpha-spectrin 2	Spna2	0.752007	0.036926	0.774215	0.0836505	0.702466	0.0504709	0.878947	0.0322741
1397481_at	BE120751	Alstrom syndrome 1 (predicted)	Alms1_predicted	1.14444	0.715667	0.343103	0.0185802	0.899746	0.833589	0.646993	0.0617055
1369842_at	NM_022227	amiloride-sensitive cation channel 5, intestinal	Accn5	0.957612	0.900556	0.971573	0.853181	1.00652	0.752972	0.950551	0.79432
1372170_at	AI411530	aminoacylase 1	Acy1	0.922575	0.581047	1.65175	0.0901153	0.895582	0.595945	1.21156	0.122607
1387223_at	NM_017193	aminoadipate aminotransferase	Aadat	0.663516	0.210235	0.816397	0.834962	0.446109	0.155191	1.0275	0.34349
1379353_at	AI233726	aminoadipate-semialdehyde dehydrogenase-phosphopantetheinyl transferase (predicted)	Aasdhppt_predicted	0.623182	0.054127	1.22324	0.0653689	0.560157	0.0202021	1.13785	0.075448
1377375_at	AA944898	aminoadipate-semialdehyde synthase (predicted)	Aass_predicted	0.304448	0.0598529	0.213481	0.000361516	0.33022	0.00928942	0.201683	0.00717097
1367720_at	NM_012899	aminolevulinate, delta-, dehydratase	Alad	0.229955	0.000700338	0.965546	0.585765	0.106664	0.0277634	0.830561	0.0942199
1367982_at	NM_024484	aminolevulinic acid synthase 1	Alas1	1.17298	0.752917	2.48468	0.00102798	0.758119	0.931751	1.85701	0.0180743
1383920_at	BF408907	aminomethyltransferase (glycine cleavage system protein T)	Amt	0.712016	0.189738	0.833558	0.983322	0.779501	0.130642	0.826675	0.762545
1388360_at	BE110600	aminopeptidase puromycin sensitive	Npepps	1.25924	0.297717	1.72818	0.0685974	1.26038	0.242439	1.34197	0.104613
1373570_at	AI411240	aminopeptidase-like 1 (predicted)	Npepl1_predicted	0.296331	0.00638155	0.313651	0.00684807	0.293926	0.0033179	0.3456	0.00964932
1387861_at	BI274118	amino-terminal enhancer of split	Aes	0.65198	0.483102	0.623371	0.0162728	0.482572	0.0222784	0.542825	0.0289782
1369839_at	NM_022217	amphiphysin 1	Amph1	0.593687	0.0657243	0.67488	0.252332	0.810069	0.261684	0.669711	0.231422
1389660_at	BE096098	amphoterin induced gene and ORF 3	Amigo3	0.551697	0.141185	0.947605	0.797165	0.759928	0.474916	0.832169	0.520353
1373442_at	AI169058	amplified in osteosarcoma	Os-9	0.893409	0.625719	0.783289	0.30321	0.941225	0.804154	0.810049	0.0282629
1369502_a_at	NM_031502	amylase 1, salivary /// amylase 2, pancreatic /// similar to amylase 2, pancreatic	Amy1 /// Amy2 /// LOC499694	0.968859	0.856234	0.345245	0.00835463	1.43334	0.573487	0.593998	0.0535118
1369503_at	NM_031502	amylase 2, pancreatic	Amy2	1.43747	0.958878	0.355527	0.0220838	1.07323	0.993695	0.462245	0.0429463
1371571_at	BG671677	amyloid beta (A4) precursor protein	App	0.706137	0.139496	0.608946	0.0161478	0.972909	0.901187	0.620796	0.0165128
1371572_at	BM986220	amyloid beta (A4) precursor protein	App	0.786064	0.74425	0.583077	0.013566	0.772263	0.241584	0.684222	0.0331327
1395120_at	BF403704	Amyloid beta (A4) precursor protein	App	0.979653	0.949911	1.20177	0.208867	1.04912	0.742963	0.869087	0.562067
1396876_at	BF393522	Amyloid beta (A4) precursor protein-binding, family A, member 1	Apba1	0.977532	0.147585	1.06815	0.633101	1.07754	0.647726	1.29584	0.235765
1376413_at	BF410366	Amyloid beta (A4) precursor protein-binding, family A, member 1	Apba1	1.03218	0.698679	0.963234	0.875454	0.987636	0.87302	0.947095	0.870438
1367842_at	NM_080478	amyloid beta (A4) precursor protein-binding, family B, member 1	Apbb1	0.933867	0.400262	0.819955	0.119779	0.81779	0.404979	0.96069	0.129584
1387185_at	NM_053957	amyloid beta (A4) precursor protein-binding, family B, member 3	Apbb3	0.369547	0.408665	0.818677	0.419095	0.644858	0.353723	0.88733	0.334011
1388121_at	M31322	amyloid beta (A4) precursor-like protein 2	Aplp2	0.742409	0.0948465	0.390591	2.75165e-05	0.825782	0.253842	0.446251	0.00919364
1383096_at	AI235240	amyloid beta (A4) precursor-like protein 2	Aplp2	1.09941	0.776302	0.956881	0.70509	0.998216	0.982575	0.964537	0.592081
1380895_at	BE103215	Amyloid beta (A4) precursor-like protein 2	Aplp2	0.92493	0.887429	0.653559	0.238054	0.927431	0.969934	0.558794	0.10273
1378475_at	BF396428	amyloid beta precursor protein (cytoplasmic tail) binding protein 2	Appbp2	0.283292	0.0287776	0.388084	0.00325706	0.24954	0.00687746	0.270219	0.0330164
1383091_at	BE113611	amyloid beta precursor protein (cytoplasmic tail) binding protein 2	Appbp2	0.559666	0.17531	1.28075	0.203583	0.325657	0.000354486	0.855949	0.0484655
1387055_at	U90829	amyloid beta precursor protein binding protein 1	Appbp1	0.81584	0.0284937	0.912261	0.138208	0.534119	0.0187296	0.819368	0.140414
1383155_at	AA945854	Amyotrophic lateral sclerosis 2 (juvenile) chromosome region, candidate 13 (predicted)	Als2cr13_predicted	0.649087	0.368714	0.467144	0.0115799	0.918948	0.546229	0.640331	0.0171576
1377166_at	BI274184	amyotrophic lateral sclerosis 2 (juvenile) homolog (human)	Als2	0.782915	0.443257	1.23805	0.131703	0.706017	0.618439	1.16109	0.028744
1373744_at	BF548006	anaphase promoting complex subunit 1 (predicted)	Anapc1_predicted	0.673238	0.0712598	1.39735	0.0772722	0.757924	0.0518909	1.00302	0.947111
1383101_at	BF556463	anaphase promoting complex subunit 10 (predicted)	Anapc10_predicted	0.826091	0.324471	0.949505	0.106011	0.926132	0.985713	1.03184	0.82244
1389087_at	AI599023	anaphase promoting complex subunit 2	Anapc2	1.01928	0.598493	1.77636	0.0618781	0.785694	0.515727	1.59756	0.200758
1374163_at	BM389995	anaphase promoting complex subunit 4	Anapc4	0.734337	0.111245	0.66602	0.143119	0.852494	0.249257	0.691786	0.0581147
1388417_at	BI281876	anaphase-promoting complex subunit 5 (predicted)	Anapc5_predicted	0.715637	0.0579625	0.59735	0.00132825	0.64174	0.0582603	0.551108	0.00156956
1370512_at	AF275151	androgen receptor-related apoptosis-associated protein CBL27	Cbl27	0.997017	0.884953	1.00472	0.717696	0.998775	0.989395	1.01056	0.947117
1397029_at	BF399100	Androgen receptor-related apoptosis-associated protein CBL27	Cbl27	0.997583	0.983042	0.880315	0.226179	1.00021	0.984753	0.922521	0.211173
1392891_at	AW535812	androgen-induced proliferation inhibitor (predicted)	Aprin_predicted	0.241099	0.0319006	0.600543	0.859013	0.365798	0.0299957	0.601134	0.667783
1377100_at	AI172172	androgen-induced proliferation inhibitor (predicted)	Aprin_predicted	1.21015	0.668433	1.92908	0.00990088	1.08173	0.572624	1.06051	0.420787
1395053_at	BE104755	androgen-induced proliferation inhibitor (predicted)	Aprin_predicted	0.976002	0.87655	0.838345	0.894312	0.635917	0.629288	0.781481	0.777094
1393833_at	AI578461	angel homolog 1 (Drosophila) (predicted)	Angel1_predicted	0.755501	0.152061	0.824388	0.191299	0.683731	0.000222052	0.586341	0.0534403
1395884_at	BF414572	angel homolog 2 (Drosophila) (predicted)	Angel2_predicted	2.40247	0.0303402	2.36551	0.00350247	1.39093	0.142818	1.26818	0.767482
1398975_at	BI281948	angio-associated migratory protein (predicted)	Aamp_predicted	0.95243	0.927324	0.995417	0.657068	1.08166	0.180553	1.06891	0.0848171
1395346_at	H33829	angio-associated migratory protein (predicted)	Aamp_predicted	1.00032	0.994852	0.994639	0.593589	1.00049	0.992804	0.999229	0.904223
1396100_at	BF563171	angiogenic factor with G patch and FHA domains 1	Aggf1	0.879703	0.26704	0.843889	0.481469	0.876543	0.269834	0.853085	0.204895
1383018_at	BF420082	angiopoietin-like 6 (predicted)	Angptl6_predicted	3.80929	0.00257057	2.05599	0.00431542	3.71335	0.00108435	2.12526	0.00441576
1398734_at	BE120772	Ankyrin 3, epithelial	Ank3	1.6693	0.118691	0.779593	0.171008	1.25155	0.252117	0.662959	0.0506709
1370638_at	AF069525	ankyrin 3, epithelial	Ank3	0.760854	0.672851	0.583311	0.0144841	0.857773	0.13764	0.333067	0.0222423
1389493_at	AI411278	ankyrin repeat and BTB (POZ) domain containing 1	Abtb1	0.911965	0.638488	0.900616	0.493674	0.726466	0.175271	1.18834	0.370133
1368111_at	NM_134403	ankyrin repeat and BTB (POZ) domain containing 2	Abtb2	1.25351	0.6212	1.60537	0.837213	1.0455	0.434557	1.0031	0.990797
1373289_at	BI281935	ankyrin repeat and SOCS box-containing protein 8 (predicted)	Asb8_predicted	0.722246	0.00554524	0.462988	0.00395228	0.824582	0.0986818	0.670062	0.014167
1373619_at	AA894306	ankyrin repeat domain 10	Ankrd10	0.709813	0.0731793	0.801563	0.0506372	0.723829	0.220858	0.77176	0.0320471
1382620_at	BF523248	ankyrin repeat domain 11 (predicted)	Ankrd11_predicted	1.20985	0.272486	1.53652	0.0312866	1.07371	0.992041	0.908633	0.470015
1381809_at	BE097847	ankyrin repeat domain 11 (predicted)	Ankrd11_predicted	1.15976	0.320084	3.12271	0.0128595	0.50219	0.170718	3.372	0.172948
1377811_at	AI577496	ankyrin repeat domain 12 (predicted)	Ankrd12_predicted	1.759	0.00679578	1.44571	0.792674	2.09175	0.0104051	2.52148	0.229036
1386097_at	AW527230	ankyrin repeat domain 12 (predicted)	Ankrd12_predicted	2.02344	0.0406271	1.77297	0.15894	2.11725	0.0134924	1.41537	0.0919268
1377505_at	BI296695	Ankyrin repeat domain 12 (predicted)	Ankrd12_predicted	1.06503	0.361175	1.00996	0.904001	0.826326	0.180743	0.944702	0.853265
1396195_at	BF550130	ankyrin repeat domain 13	Ankrd13	0.82564	0.997104	1.47199	0.055742	0.999245	0.987086	1.17389	0.135934
1373059_at	AA944355	ankyrin repeat domain 13	Ankrd13	0.964163	0.998404	1.23612	0.0591438	0.877495	0.322296	1.49689	0.00284209
1393022_at	BG380737	ankyrin repeat domain 13 family, member D (predicted)	Ankrd13d_predicted	1.00358	0.581337	1.02728	0.974178	1.00894	0.975382	1.00122	0.128136
1372069_at	BF284716	ankyrin repeat domain 15	Ankrd15	1.134	0.457117	1.21542	0.376569	1.06076	0.779211	1.14726	0.532369
1371805_at	AI406508	ankyrin repeat domain 46	Ankrd46	0.422837	0.00390792	0.440515	0.028293	0.543668	0.00421712	0.469301	0.0110465
1375212_at	AA964250	ankyrin repeat domain 52 (predicted)	Ankrd52_predicted	0.951857	0.166738	0.802244	0.716124	0.97087	0.705807	0.816068	0.702045
1394451_at	AI236455	annexin A1	Anxa1	1.93914	0.28487	1.2072	0.448239	1.00022	0.21018	1.61915	0.218527
1388445_at	BF287964	annexin A11	Anxa11	2.09509	0.00220755	1.08183	0.110348	2.0253	0.00429254	0.862343	0.0315997
1367584_at	NM_019905	annexin A2	Anxa2	8.63862	0.00753019	44.5038	1.19734e-06	2.83518	0.0986937	17.5098	0.00512077
1367974_at	NM_012823	annexin A3	Anxa3	1.16832	0.501321	2.05029	0.028061	1.1467	0.0560735	1.35321	0.139789
1395784_at	BF287979	Annexin A4	Anxa4	0.821351	0.0743822	1.20025	0.61972	1.63963	0.0258957	1.42682	0.619834
1389305_at	BM385237	annexin A4	Anxa4	1.49762	0.0840903	1.00426	0.0445954	1.51585	0.0369689	1.10115	0.533279
1368908_at	NM_024155	annexin A4	Anxa4	1.28899	0.296829	1.74176	0.121927	1.1826	0.625217	2.01163	0.00515364
1386862_at	NM_013132	annexin A5	Anxa5	1.62	0.160838	1.62286	0.00141633	1.60917	0.0762327	1.22284	0.00828788
1387673_a_at	BI285568	annexin A6	Anxa6	0.819676	0.786107	0.625774	0.00570885	1.17313	0.280261	0.521068	0.00132236
1368143_at	AI013902	annexin A7	Anxa7	1.59005	0.0359418	2.03214	0.00130329	1.03513	0.836295	1.61431	0.00750261
1368142_at	NM_130416	annexin A7	Anxa7	2.59797	0.0594347	1.44251	0.140033	1.10704	0.770737	1.34046	0.598209
1389441_at	BF416508	annexin V-binding protein ABP-10	Abp10	0.625117	0.038955	1.69981	0.40654	0.655786	0.650286	1.01481	0.501221
1388885_at	BI275921	anterior pharynx defective 1a homolog (C. elegans)	Aph1a	0.928719	0.762158	1.15079	0.101713	0.840582	0.171548	0.988083	0.991566
1395521_at	BI299174	Anterior pharynx defective 1b homolog (C. elegans)	Aph1b	1.05048	0.799776	1.36805	0.131041	1.15316	0.461745	1.29061	0.167589
1388440_at	AI408482	anterior pharynx defective 1b homolog (C. elegans)	Aph1b	1.04531	0.810805	0.995795	0.984107	1.0575	0.572205	0.669272	0.685246
1374775_at	AI714002	antigen identified by monoclonal antibody Ki-67 (predicted) /// similar to Mki67 protein (predicted) /// similar to Ki-67 (predicted)	Mki67_predicted /// RGD1564824_predicted /// RGD1566252_predicted	1.0823	0.980171	1.08513	0.351407	1.4252	0.086814	0.87398	0.163694
1380270_at	BF417890	Antigen p97 (melanoma associated) identified by monoclonal antibodies 133.2 and 96.5 (predicted)	Mfi2_predicted	1.00034	0.227462	1.00067	0.991095	0.9965	0.986199	0.998658	0.983638
1368243_at	NM_030998	anti-Mullerian hormone type 2 receptor	Amhr2	0.686883	0.0758571	1.28063	0.14116	1.00872	0.0842278	1.01473	0.774644
1384675_at	AI029113	antisense paternally expressed gene 3	Apeg3	0.569539	0.0986571	0.41423	0.000946021	1.04211	0.819378	0.587866	0.0024809
1372025_at	BI296467	Antisense paternally expressed gene 3	Apeg3	1.18283	0.32565	0.496277	0.0155811	1.24144	0.371225	0.584964	0.176897
1370575_a_at	D50734	antizyme inhibitor 1	Azin1	1.04934	0.371631	2.23326	0.0243941	1.08768	0.810129	1.92972	0.0204935
1370191_at	AI411263	antizyme inhibitor 1	Azin1	0.651	0.597435	0.818183	0.159282	0.765676	0.15353	0.914728	0.228053
1388450_at	BI279570	AP1 gamma subunit binding protein 1	Ap1gbp1	1.00774	0.965846	0.753962	0.15285	1.47465	0.0194933	0.83728	0.587708
1367536_at	AI172106	APAF1 interacting protein (predicted)	Apip_predicted	0.622503	0.460451	1.60453	0.00305798	0.618622	0.0211735	1.09332	0.113743
1398805_at	NM_134394	APG3 autophagy 3-like (S. cerevisiae)	Apg3l	1.94284	0.0741874	2.47534	0.000344389	1.60269	0.048542	1.99952	0.0203258
1367520_at	AI231050	apolipoprotein A-I binding protein (predicted)	Apoa1bp_predicted	1.00089	0.942685	1.43428	0.785305	1.05102	0.149953	1.16225	0.322768
1390879_at	BE098355	Apolipoprotein B editing complex 2 (predicted)	Apobec2_predicted	0.870865	0.292313	0.594603	0.0549385	0.874619	0.335913	0.829492	0.112331
1396699_at	BF392736	Apolipoprotein B editing complex 3	Apobec3	1.18962	0.646158	0.963286	0.755433	1.29157	0.515112	0.926272	0.533582
1379604_at	BF284937	apolipoprotein L, 3 /// similar to RIKEN cDNA 2210421G13	Apol3 /// LOC500903	1.72361	0.22794	1.00326	0.959523	1.58868	0.234093	1.00067	0.994356
1368330_at	NM_053720	apoptosis antagonizing transcription factor	Aatf	1.17924	0.0825559	10.6052	0.000707437	1.20854	0.127224	6.27781	0.00374294
1392423_at	AI602137	Apoptosis antagonizing transcription factor	Aatf	1.21587	0.470658	1.22304	0.914121	1.33529	0.0765537	1.00321	0.792263
1367491_at	AI233249	apoptosis inhibitor 5 (predicted)	Api5_predicted	1.00497	0.208566	0.873161	0.0608752	1.05448	0.387979	1.04995	0.274584
1379484_at	AA899459	apoptosis, caspase activation inhibitor (predicted)	Aven_predicted	0.967482	0.366293	1.23514	0.469251	0.860766	0.243966	1.22646	0.0634328
1398944_at	BE116857	apoptotic chromatin condensation inducer 1	Acin1	1.05474	0.205083	1.079	0.871779	1.29938	0.0370504	1.01028	0.167807
1396098_at	BG380369	apoptotic chromatin condensation inducer 1	Acin1	0.983554	0.941432	0.8283	0.278383	1.30655	0.513482	0.842268	0.113871
1369197_at	NM_023979	apoptotic peptidase activating factor 1	Apaf1	2.15667	0.0608366	1.39837	0.0202354	3.75399	0.000609114	2.47666	0.0100978
1369198_at	AF218388	apoptotic peptidase activating factor 1	Apaf1	0.736744	0.130846	0.890076	0.98787	0.737326	0.125017	0.998742	0.88688
1376900_at	BM390531	aprataxin	Aptx	0.988859	0.822054	1.27634	0.370005	0.961103	0.724893	0.992712	0.412604
1386910_a_at	AF311054	apurinic/apyrimidinic endonuclease 1	Apex1	0.525746	0.0305662	1.91695	0.0240947	0.467486	0.0200056	1.29612	0.144696
1371217_at	AF311054	apurinic/apyrimidinic endonuclease 1	Apex1	0.912199	0.0863705	1.64501	0.0109484	0.392705	0.0217705	1.21227	0.257401
1380794_at	BE106342	Aquarius (predicted)	Aqr_predicted	1.59942	0.0776402	0.939594	0.187027	1.20605	0.125399	1.31847	0.294874
1373704_at	BI294892	aquarius (predicted)	Aqr_predicted	0.621502	0.211421	0.718086	0.688329	0.507741	0.024344	1.0357	0.774561
1385017_at	AW533683	aquarius (predicted)	Aqr_predicted	0.843862	0.884456	1.32185	0.161163	1.19032	0.375028	1.6294	0.141183
1392689_at	AI105029	arachidonate lipoxygenase 3 (predicted)	Aloxe3_predicted	7.43539	0.00926557	2.18943	0.0117973	2.01516	0.0120181	1.27436	0.282452
1391658_at	BF414061	archain 1	Arcn1	0.742435	0.706555	2.70914	0.0411802	0.812517	0.33296	1.10264	0.319106
1398896_at	AA892567	archain 1	Arcn1	0.750715	0.964963	1.63491	0.000327611	0.680694	0.252521	1.44613	0.0182388
1387018_at	NM_053770	Arg/Abl-interacting protein ArgBP2	Argbp2	0.219004	0.0061978	0.214717	0.0330941	0.265193	0.0325944	0.156628	0.029979
1368266_at	NM_017134	arginase 1	Arg1	0.645177	0.0173719	0.145056	0.00514074	0.762721	0.157658	0.275993	0.022993
1371265_at	X83264	arginine vasopressin receptor 2	Avpr2	1.00009	0.949697	0.998015	0.213466	1.00165	0.989295	0.999482	0.629938
1370252_at	BI282724	arginine vasopressin-induced 1	Avpi1	0.745334	0.0242808	2.00013	0.0271838	0.53732	0.0295933	1.8483	0.073395
1370251_at	AI010260	arginine vasopressin-induced 1	Avpi1	1.06856	0.234847	1.00258	0.974864	1.00401	0.945721	0.988302	0.906373
1389009_at	BF418778	arginine/serine-rich coiled-coil 1	Rsrc1	0.920437	0.0835384	1.92979	0.110514	0.763952	0.391138	1.5764	0.168884
1369049_at	NM_053885	arginine-glutamic acid dipeptide (RE) repeats	Rere	1.68155	0.00982224	3.80567	0.00166676	1.58374	0.0448869	4.25737	0.000757559
1379575_at	BF412271	Arginine-glutamic acid dipeptide (RE) repeats	Rere	1.26787	0.43145	1.29292	0.27086	1.09485	0.760448	1.25595	0.28007
1371890_at	AI172033	Arginine-glutamic acid dipeptide (RE) repeats	Rere	1.05905	0.656573	0.857102	0.0360752	1.04751	0.718903	0.976533	0.683999
1396047_at	AW920332	arginine-glutamic acid dipeptide (RE) repeats	Rere	0.99638	0.992091	1.00171	0.9286	1.00402	0.991527	1.15915	0.993693
1372352_at	AI170666	arginine-rich, mutated in early stage tumors (predicted)	Armet_predicted	0.752873	0.410711	1.76013	0.0368954	0.726037	0.0583913	1.37965	0.130042
1377963_at	AW526938	Arginine-tRNA-protein transferase 1 (predicted)	Ate1_predicted	0.54162	0.283315	0.377504	0.000611093	0.445346	0.021469	0.372822	0.0168617
1394118_at	AA894340	Arginine-tRNA-protein transferase 1 (predicted)	Ate1_predicted	0.939505	0.589813	1.2531	0.017084	0.789059	0.0546566	1.11137	0.220175
1377820_a_at	BI276525	Arginine-tRNA-protein transferase 1 (predicted)	Ate1_predicted	1.07287	0.864751	1.43838	0.0124959	0.871632	0.0110348	1.31487	0.0296255
1368916_at	NM_021577	argininosuccinate lyase	Asl	0.97386	0.65421	0.501314	0.00637905	0.917156	0.250527	0.502378	0.00106485
1370964_at	BF283456	argininosuccinate synthetase	Ass	5.93266	0.000391141	14.2148	0.00354549	0.75423	0.920399	1.72708	0.078235
1367987_at	NM_031097	arginyl aminopeptidase (aminopeptidase B)	Rnpep	0.68819	0.0805497	0.65702	0.00220045	0.770969	0.533007	0.674661	0.0442684
1372255_at	BF283284	arginyl-tRNA synthetase (predicted)	Rars_predicted	1.82372	0.0450689	2.45831	0.0013572	2.06831	0.00125487	2.68817	0.0161832
1377684_at	BE118562	arginyl-tRNA synthetase-like (predicted)	Rarsl_predicted	0.551902	0.0226137	0.368947	0.0900222	0.639507	0.0663816	1.02608	0.99178
1379303_at	AA964811	ariadne homolog 2 (Drosophila) (predicted)	Arih2_predicted	1.02471	0.472345	1.07795	0.0712862	1.0597	0.470962	1.04439	0.792169
1373141_at	AI236683	ariadne homolog 2 (Drosophila) (predicted)	Arih2_predicted	1.40401	0.475017	1.12343	0.353733	0.938011	0.68827	1.08044	0.887405
1375973_at	AI600108	ariadne ubiquitin-conjugating enzyme E2 binding protein homolog 1 (Drosophila)	Arih1	1.6845	0.0595974	4.5809	0.000537204	0.968667	0.67239	2.98689	0.00153148
1393118_at	BI295562	armadillo repeat containing 1 (predicted)	Armc1_predicted	0.81052	0.206239	1.67968	0.0378313	0.613924	0.0663519	1.63904	0.0147895
1392930_at	BI276980	armadillo repeat containing 1 (predicted)	Armc1_predicted	0.930931	0.714069	0.40212	0.00660215	0.791747	0.0245286	0.338867	0.00624645
1373716_at	BM390404	armadillo repeat containing 5	Armc5	0.75755	0.265513	0.630855	0.24926	1.05636	0.490626	0.845462	0.867971
1393233_at	BG381676	Armadillo repeat containing 6 (predicted)	Armc6_predicted	1.02722	0.471187	0.99848	0.927778	1.00064	0.545514	0.980364	0.984472
1393220_at	AI502723	Armadillo repeat containing 8 (predicted)	Armc8_predicted	1.23872	0.246903	1.21502	0.207616	1.12878	0.944383	0.883149	0.190295
1385862_at	BF552350	armadillo repeat containing 9 (predicted)	Armc9_predicted	0.538513	0.105128	0.947307	0.739349	0.690941	0.0763081	1.06644	0.975429
1397092_at	AI145850	armadillo repeat containing 9 (predicted)	Armc9_predicted	0.982977	0.85233	1.0111	0.0784249	0.964864	0.556134	0.912868	0.145049
1373156_at	AI385330	armadillo repeat containing, X-linked 2	Armcx2	0.465171	0.155962	0.903275	0.121071	0.482126	0.0123009	0.904658	0.215127
1371741_at	AI409891	ARP1 actin-related protein 1 homolog A (yeast) (predicted)	Actr1a_predicted	0.933336	0.563179	0.836398	0.33718	0.847379	0.27058	0.83706	0.0406554
1373048_at	AI177051	ARP10 actin-related protein 10 homolog (S. cerevisiae)	Actr10	0.69563	0.0870769	0.793997	0.00572532	0.644203	0.00857432	0.739409	0.0418961
1398626_s_at	AW920881	ARP2 actin-related protein 2 homolog (yeast)	Actr2	1.05734	0.551904	1.5859	0.0271318	0.868294	0.21133	1.14482	0.0802065
1375424_at	BE107525	ARP2 actin-related protein 2 homolog (yeast)	Actr2	0.742566	0.743314	1.79896	0.0117385	0.820124	0.348308	1.22669	0.0320714
1370890_at	AI012420	ARP3 actin-related protein 3 homolog (yeast)	Actr3	1.28464	0.085631	2.27769	0.00430757	1.04193	0.363226	1.78884	0.0363617
1388128_at	BI292004	ARP3 actin-related protein 3 homolog (yeast)	Actr3	1.33069	0.157697	0.95315	0.53406	1.17526	0.547172	1.13251	0.840728
1376353_at	BI289883	ARP5 actin-related protein 5 homolog (yeast) (predicted)	Actr5_predicted	0.686616	0.33898	0.837571	0.42358	0.834845	0.150148	1.29779	0.0111119
1373472_at	AI177008	ARP6 actin-related protein 6 homolog (yeast) (predicted)	Actr6_predicted	1.14594	0.332102	1.40464	0.00533724	1.44188	0.488988	1.99219	0.0055425
1373096_at	AI407406	ARP8 actin-related protein 8 homolog (S. cerevisiae) (predicted)	Actr8_predicted	0.623532	0.273731	0.819972	0.0908226	0.542641	0.0819552	0.998795	0.180831
1376297_at	BE112202	arrestin domain containing 1	Arrdc1	1.848	0.00864312	3.46643	0.00196284	2.26544	0.0602622	3.05045	0.00437138
1370265_at	BF285345	arrestin, beta 2	Arrb2	1.06381	0.472528	0.786458	0.0516466	1.16368	0.101699	1.34507	0.155581
1372142_at	AI406558	arsA arsenite transporter, ATP-binding, homolog 1 (bacterial)	Asna1	0.602601	0.767361	1.69764	0.146502	0.528722	0.0187311	1.70748	0.106886
1368244_at	NM_080890	arsenic (+3 oxidation state) methyltransferase	As3mt	0.818382	0.0914001	0.449502	0.0138206	0.3979	0.0647827	0.369827	0.0180054
1389057_at	AI007774	ARV1 homolog (yeast) (predicted)	Arv1_predicted	1.42993	0.129161	1.59475	0.00973956	1.56142	0.0432416	1.41356	0.0593276
1369244_at	NM_012780	aryl hydrocarbon receptor nuclear translocator	Arnt	0.940908	0.779411	2.21708	0.00811799	0.998935	0.286768	0.995212	0.254288
1370510_a_at	AB012600	aryl hydrocarbon receptor nuclear translocator-like	Arntl	1.00683	0.304215	1.06599	0.348895	1.13164	0.164194	1.01432	0.861634
1388922_at	BM388677	aryl-hydrocarbon receptor-interacting protein	Aip	0.806337	0.847703	1.84453	0.175019	0.667025	0.18748	1.04197	0.349331
1389339_at	BF284062	Arylsulfatase A	Arsa	0.637784	0.0152783	0.797871	0.154271	0.895789	0.294438	0.715735	0.0367921
1375412_at	AI101331	Arylsulfatase B	Arsb	0.599215	0.171777	0.32169	0.0156057	1.11495	0.285959	0.482749	0.0944879
1380525_at	AA849862	arylsulfatase E (chondrodysplasia punctata 1)	Arse	0.496701	0.125724	0.834852	0.20431	1.44947	0.337559	0.977488	0.898881
1383120_at	BE107993	arylsulfatase K	Arsk	1.04459	0.712505	0.859144	0.982742	0.742509	0.701604	1.18444	0.143748
1385616_a_at	AI137136	ASF1 anti-silencing function 1 homolog A (S. cerevisiae) (predicted)	Asf1a_predicted	0.848151	0.0901517	0.824323	0.606596	0.795997	0.0795271	0.687442	0.887926
1379192_at	AW528096	ASF1 anti-silencing function 1 homolog A (S. cerevisiae) (predicted)	Asf1a_predicted	1.00798	0.867369	0.914078	0.3483	0.985026	0.886076	0.912894	0.0582735
1382847_at	BG663056	ash1 (absent, small, or homeotic)-like (Drosophila) (predicted)	Ash1l_predicted	1.3721	0.0808845	1.97565	0.052683	2.04729	0.0435573	2.36855	0.0238098
1380497_at	AW521174	ash1 (absent, small, or homeotic)-like (Drosophila) (predicted)	Ash1l_predicted	1.2279	0.12528	0.543422	0.0662032	1.71835	0.0444592	0.281797	0.0427661
1382862_at	BE119506	Ash1 (absent, small, or homeotic)-like (Drosophila) (predicted)	Ash1l_predicted	1.66525	0.253634	1.09916	0.543164	1.23081	0.578186	1.29241	0.934035
1397969_at	BF401230	Ash1 (absent, small, or homeotic)-like (Drosophila) (predicted)	Ash1l_predicted	0.993451	0.931291	0.96258	0.551622	1.29757	0.232943	0.933106	0.0806992
1371458_at	BF392740	Ash1 (absent, small, or homeotic)-like (Drosophila) (predicted)	Ash1l_predicted	0.943977	0.943072	0.97427	0.9807	1.02578	0.489196	1.16358	0.992557
1388871_at	BG378089	ash2 (absent, small, or homeotic)-like (Drosophila) (predicted)	Ash2l_predicted	0.820737	0.471749	1.04813	0.378564	0.684955	0.0236866	0.779484	0.160951
1389719_at	BI287001	Ash2 (absent, small, or homeotic)-like (Drosophila) (predicted)	Ash2l_predicted	0.95162	0.626323	0.863197	0.17694	0.93348	0.662959	0.936073	0.2484
1393581_at	AW528001	asp (abnormal spindle)-like, microcephaly associated (Drosophila) (predicted)	Aspm_predicted	1.03919	0.357972	0.679667	0.926868	1.23026	0.669679	1.36621	0.145509
1374871_at	AI233343	asparaginase like 1	Asrgl1	0.833824	0.41133	0.744776	0.211126	0.686895	0.0912469	0.407406	0.137043
1387925_at	U07202	asparagine synthetase	Asns	1.14437	0.0686408	1.33999	0.0118465	0.910437	0.53611	1.23868	0.0194272
1373107_at	BF283792	asparagine-linked glycosylation 1 homolog (yeast, beta-1,4-mannosyltransferase) (predicted)	Alg1_predicted	0.554352	0.0880374	0.755921	0.190423	0.433992	0.0344814	0.403978	0.0752906
1372902_at	BI289064	asparagine-linked glycosylation 12 homolog (yeast, alpha-1,6-mannosyltransferase) (predicted)	Alg12_predicted	0.622356	0.267905	2.8628	0.016054	0.781996	0.0421933	1.45233	0.13482
1374459_at	AI178448	asparagine-linked glycosylation 2 homolog (yeast, alpha-1,3-mannosyltransferase)	Alg2	0.578	0.314293	0.551131	0.00149444	0.570042	0.0960687	0.632378	0.00939171
1379521_at	AW525817	asparagine-linked glycosylation 3 homolog (yeast, alpha-1,3-mannosyltransferase)	Alg3	0.721879	0.62665	1.44141	0.0112501	0.457748	0.00428757	1.13385	0.0448391
1382019_at	AA998062	asparagine-linked glycosylation 5 homolog (yeast, dolichyl-phosphate beta-glucosyltransferase)	Alg5	0.457426	0.000539294	0.478197	0.000318665	0.585473	0.00602314	0.554252	0.0013684
1375042_at	BI287504	asparagine-linked glycosylation 8 homolog (yeast, alpha-1,3-glucosyltransferase)	Alg8	0.860043	0.871874	0.75884	0.280421	1.64373	0.208235	1.02986	0.901183
1392422_at	AI236397	asparagine-linked glycosylation 9 homolog (yeast, alpha 1,2 mannosyltransferase) (predicted)	Alg9_predicted	0.638803	0.228075	1.2014	0.192858	0.52515	0.00859571	1.47869	0.0571645
1374437_at	BF419336	asparaginyl-tRNA synthetase	Nars	1.05441	0.551524	2.61097	0.000268874	0.784045	0.47753	2.34602	0.00323103
1393345_at	BF561145	Aspartate-beta-hydroxylase (predicted)	Asph_predicted	0.621134	0.346639	0.334915	0.000362153	0.906676	0.60514	0.529718	0.0135196
1398954_at	AI412298	aspartyl aminopeptidase	Dnpep	1.04066	0.797668	0.755889	0.127686	1.19686	0.426587	0.973169	0.767353
1372421_at	AA943766	aspartylglucosaminidase	Aga	0.587718	0.457704	0.327929	0.00494647	0.555067	0.0144989	0.394426	0.00690392
1398795_at	NM_053799	aspartyl-tRNA synthetase	Dars	0.788283	0.666935	1.02252	0.632862	0.700033	0.352509	1.16706	0.323133
1376135_at	BI294730	aspartyl-tRNA synthetase 2 (mitochondrial)	Dars2	1.00136	0.714529	0.99209	0.951502	1.06303	0.567844	0.767359	0.504781
1388963_at	AI102087	astrotactin 1	Astn1	0.687885	0.0870255	0.16778	0.0156393	0.690778	0.0078573	0.304232	0.0264051
1392502_at	BI275796	AT hook containing transcription factor 1 (predicted)	Ahctf1_predicted	1.2314	0.165624	1.71589	0.00541854	1.40937	0.201418	1.65735	0.0170425
1381611_at	BF396355	AT hook containing transcription factor 1 (predicted)	Ahctf1_predicted	0.978875	0.51715	1.13796	0.442474	1.07584	0.906978	1.3208	0.312595
1389850_at	AA900926	AT rich interactive domain 1A (Swi1 like) (predicted)	Arid1a_predicted	1.36188	0.138221	0.918794	0.241675	0.805683	0.958707	0.747001	0.000351756
1375524_at	AA956714	AT rich interactive domain 1A (Swi1 like) (predicted)	Arid1a_predicted	1.06287	0.185664	1.61679	0.0661988	1.33122	0.299995	1.16841	0.197093
1382441_at	AI556402	AT rich interactive domain 1B (Swi1 like)	Arid1b	0.985878	0.476082	0.774128	0.010262	0.943343	0.247889	0.817709	0.0108674
1381925_x_at	AI412401	AT rich interactive domain 1B (Swi1 like) /// hypothetical gene supported by NM_172157	Arid1b /// LOC497729	1.14409	0.0413979	0.808205	0.0202758	0.98147	0.81338	0.879425	0.0534858
1397667_at	BG667685	AT rich interactive domain 1B (Swi1 like) /// hypothetical gene supported by NM_172157	Arid1b /// LOC497729	0.994427	0.900085	0.505786	0.0512699	0.999126	0.917948	0.50297	0.0515322
1379188_at	BI289741	AT rich interactive domain 2 (Arid-rfx like) (predicted)	Arid2_predicted	0.922521	0.450282	0.861616	0.445664	1.22161	0.406162	0.99922	0.709217
1379112_at	AW528085	AT rich interactive domain 4A (Rbp1 like) (predicted)	Arid4a_predicted	0.915393	0.137914	1.02396	0.671618	0.64797	0.122966	0.966345	0.980509
1376523_at	BF391127	AT rich interactive domain 4A (Rbp1 like) (predicted)	Arid4a_predicted	0.529343	0.422376	0.874135	0.958571	0.770552	0.978521	0.89469	0.984411
1368837_at	NM_053421	AT rich interactive domain 4B (Rbp1 like)	Arid4b	1.21447	0.0956429	0.729599	0.0219426	1.02305	0.847862	0.75072	0.113017
1381151_at	BF386697	AT rich interactive domain 4B (Rbp1 like)	Arid4b	1.10333	0.173776	1.56501	0.464639	1.69598	0.173381	0.875889	0.333565
1379311_at	AI177813	AT rich interactive domain 5A (Mrf1 like)	Arid5a	2.26738	0.0258834	1.49937	0.0191413	4.70985	0.00158346	1.93393	0.000848649
1382312_at	AW530903	AT rich interactive domain 5B (Mrf1 like) (predicted)	Arid5b_predicted	2.87838	0.0404399	1.17612	0.491214	2.24272	0.0136558	0.835317	0.491797
1381944_at	BF387066	Ataxia, cerebellar, Cayman type (caytaxin) (predicted)	Atcay_predicted	1.45095	0.9306	1.08767	0.859845	1.48641	0.0512154	1.20006	0.950184
1369709_at	NM_012726	ataxin 1	Atxn1	1.22368	0.194417	1.94726	0.682099	1.00179	0.995092	0.916277	0.992155
1398874_at	BI274345	ataxin 10	Atxn10	0.44865	0.0889073	0.815654	0.0929005	0.562629	0.00102832	0.803801	0.094119
1377138_at	AI709547	Ataxin 10	Atxn10	1.13179	0.978152	1.14773	0.0269478	1.19051	0.980929	0.898782	0.920001
1391158_a_at	BE109041	ataxin 2 (predicted)	Atxn2_predicted	0.838616	0.142183	1.00009	0.848229	0.763296	0.0627606	0.878939	0.0109963
1388826_at	BE349657	ataxin 2-like (predicted)	Atxn2l_predicted	0.688917	0.0196814	1.63121	0.00519247	1.17614	0.441243	1.28715	0.00929162
1390294_at	BE100986	Ataxin 7-like 4 (predicted)	Atxn7l4_predicted	0.27694	0.0422865	0.813294	0.795749	0.277666	0.00735757	1.06955	0.661976
1372375_at	BF395615	ATG16 autophagy related 16-like 1 (S. cerevisiae) (predicted)	Atg16l1_predicted	0.674478	0.028772	1.44013	0.0819037	0.911673	0.608925	1.22998	0.0475397
1391064_at	BI295177	ATG16 autophagy related 16-like 2 (S. cerevisiae) (predicted)	Atg16l2_predicted	1.07583	0.982521	0.896927	0.0421524	1.24762	0.681388	0.884995	0.0123806
1374831_at	AI172579	ATH1, acid trehalase-like 1 (yeast) (predicted)	Athl1_predicted	0.768312	0.0582953	0.285214	0.0337411	1.44243	0.580047	0.382996	0.0158714
1374922_at	AI013096	ATP binding domain 1 family, member B (predicted)	Atpbd1b_predicted	1.07674	0.782733	1.84532	0.0372826	1.11015	0.26092	1.52607	0.00411537
1393604_at	BE106064	ATP binding domain 1 family, member C	Atpbd1c	0.850432	0.502925	0.742128	0.236641	0.831165	0.503031	0.740957	0.229965
1367854_at	NM_016987	ATP citrate lyase	Acly	0.608921	0.000901685	0.60946	6.35221e-06	0.664752	0.0012224	0.713925	0.030267
1371892_at	BI274263	ATP synthase mitochondrial F1 complex assembly factor 2 (predicted)	Atpaf2_predicted	1.36716	0.445789	0.794834	0.10182	1.63515	0.0434766	1.21017	0.0109188
1398855_at	AA893531	ATP synthase, H+ transporting, mitochondrial F0 complex, subunit b, isoform 1	Atp5f1	0.589248	0.384166	0.714249	0.0327522	0.559337	0.0953431	0.693518	0.00833302
1367620_at	NM_053756	ATP synthase, H+ transporting, mitochondrial F0 complex, subunit c (subunit 9) isoform 3	Atp5g3	0.834971	0.573914	0.869004	0.0237159	0.683769	0.058924	0.858733	0.0216483
1367599_at	NM_017311	ATP synthase, H+ transporting, mitochondrial F0 complex, subunit c (subunit 9), isoform 1	Atp5g1	0.617732	0.346424	0.745109	0.0418347	0.55972	0.00574626	0.681107	0.1085
1370207_at	AI170772	ATP synthase, H+ transporting, mitochondrial F0 complex, subunit c (subunit 9), isoform 2 /// similar to ATP synthase, H+ transporting, mitochondrial F0 complex, subunit c (subunit 9), isoform 2 (predicted)	Atp5g2 /// RGD1566212_predicted	0.663639	0.824327	1.02263	0.242869	0.496348	0.339712	0.923173	0.134872
1367622_at	NM_019383	ATP synthase, H+ transporting, mitochondrial F0 complex, subunit d	Atp5h	0.749309	0.208173	0.810448	0.0344521	0.629371	0.0230619	0.673459	0.0691736
1387019_at	NM_080481	ATP synthase, H+ transporting, mitochondrial F0 complex, subunit e	Atp5i	0.715635	0.93207	0.793833	0.0334154	1.20612	0.854892	0.857345	0.353516
1370230_at	BG666602	ATP synthase, H+ transporting, mitochondrial F0 complex, subunit F6	Atp5j	0.839591	0.444202	0.769937	0.0673001	0.957033	0.715204	0.855248	0.0355223
1370378_at	J05266	ATP synthase, H+ transporting, mitochondrial F1 complex, alpha subunit, isoform 1	Atp5a1	0.448923	0.2923	0.438399	0.000977088	0.527812	0.175166	0.539366	0.00435899
1370275_at	M19044	ATP synthase, H+ transporting, mitochondrial F1 complex, beta polypeptide	Atp5b	0.711122	0.22676	0.972289	0.295716	0.638016	0.0214683	0.917962	0.0227808
1380070_at	BG377244	ATP synthase, H+ transporting, mitochondrial F1 complex, beta polypeptide	Atp5b	0.786617	0.515302	0.785325	0.0646083	0.747547	0.133615	0.807102	0.264437
1370278_at	U00926	ATP synthase, H+ transporting, mitochondrial F1 complex, delta subunit	Atp5d	0.603155	0.42993	0.828363	0.301556	0.479142	0.000895782	0.85697	0.291383
1370284_at	AF010323	ATP synthase, H+ transporting, mitochondrial F1 complex, epsilon subunit	Atp5e	0.846728	0.789518	0.592911	0.00935827	0.790917	0.0105445	0.569897	0.201565
1370918_a_at	BI275939	ATP synthase, H+ transporting, mitochondrial F1 complex, gamma polypeptide 1	Atp5c1	0.533531	0.20577	0.692704	0.00326966	0.412048	0.0320851	0.672028	0.00301102
1370276_at	D13127	ATP synthase, H+ transporting, mitochondrial F1 complex, O subunit	Atp5o	0.606105	0.367899	0.609559	0.0481229	0.48525	0.0147881	0.664718	0.0267669
1380339_at	AW520369	ATP/GTP binding protein 1 (predicted)	Agtpbp1_predicted	1.0014	0.41535	1.53875	0.00870334	1.00112	0.57714	0.998048	0.984996
1391891_at	AI711114	ATP/GTP binding protein 1 (predicted)	Agtpbp1_predicted	0.953508	0.563918	1.57493	0.0280634	0.924143	0.457827	1.01875	0.532981
1373378_at	BF410522	ATP/GTP binding protein 1 (predicted)	Agtpbp1_predicted	0.858377	0.609594	1.52835	0.0142083	0.821503	0.271618	1.48412	0.0458843
1379561_at	AW433567	ATPase family, AAA domain containing 1	Atad1	3.04488	0.0109448	1.43129	0.029541	4.07217	0.00132779	2.12753	0.00664724
1376599_at	AW915567	ATPase family, AAA domain containing 2 (predicted)	Atad2_predicted	0.886466	0.246442	0.674579	0.0849089	0.631971	0.321124	0.673129	0.0885615
1369588_a_at	NM_012915	ATPase inhibitory factor 1	Atpif1	1.13479	0.441701	1.13566	0.90308	1.03135	0.644836	1.08644	0.901276
1371229_at	M35300	ATPase inhibitory factor 1	Atpif1	1.1045	0.95584	1.20931	0.0778516	0.8331	0.299142	1.12658	0.400263
1371925_at	AA893621	ATPase type 13A1 (predicted)	Atp13a1_predicted	1.74563	0.00462604	1.61294	0.00152499	2.43827	0.0212301	2.10082	0.0248096
1396884_at	BF404113	ATPase, aminophospholipid transporter (APLT), class I, type 8A, member 1 (predicted)	Atp8a1_predicted	4.19995	0.0206189	1.02185	0.57193	4.10603	0.218355	1.53382	0.88356
1398164_at	BF406182	ATPase, aminophospholipid transporter (APLT), class I, type 8A, member 1 (predicted)	Atp8a1_predicted	1.5081	0.0562034	1.00214	0.45104	0.96112	0.986718	0.962471	0.913596
1393515_at	AI145077	ATPase, aminophospholipid transporter (APLT), class I, type 8A, member 1 (predicted)	Atp8a1_predicted	1.49024	0.431896	0.773581	0.767211	1.00898	0.396711	1.0052	0.99813
1370426_a_at	AI175492	ATPase, Ca++ transporting, cardiac muscle, slow twitch 2	Atp2a2	0.514064	0.02584	0.62643	0.00218316	0.523202	0.0199317	0.649677	0.0061175
1398862_at	J04024	ATPase, Ca++ transporting, cardiac muscle, slow twitch 2	Atp2a2	0.410012	0.026225	0.507163	0.0399064	0.33599	0.0124394	0.517614	0.0181508
1369065_a_at	NM_017290	ATPase, Ca++ transporting, cardiac muscle, slow twitch 2	Atp2a2	0.396758	0.0453385	0.21358	0.00224361	0.453358	0.0227592	0.248069	0.0197078
1397224_at	AW534277	ATPase, Ca++ transporting, plasma membrane 1	Atp2b1	0.61335	0.00745585	0.525118	0.0040853	0.597622	0.00982701	0.499872	0.00750445
1370050_at	NM_053311	ATPase, Ca++ transporting, plasma membrane 1	Atp2b1	0.570691	0.0699037	0.777801	0.0625661	0.733754	0.190509	0.763854	0.0288898
1394714_at	BF386268	ATPase, Ca++ transporting, plasma membrane 1	Atp2b1	0.517174	0.122737	1.69439	0.510608	1.15935	0.607661	1.30915	0.32492
1386426_at	AI137869	ATPase, Ca++ transporting, plasma membrane 1	Atp2b1	0.568407	0.136328	1.04538	0.863338	0.661435	0.0759993	0.9148	0.934198
1380195_at	AI145357	ATPase, Ca++ transporting, plasma membrane 1	Atp2b1	0.787085	0.653847	2.36195	0.165488	0.976314	0.851263	1.03819	0.901492
1368698_at	J03754	ATPase, Ca++ transporting, plasma membrane 2	Atp2b2	0.164408	0.00899669	0.0755121	0.000137305	0.506058	0.0313259	0.0617541	0.0229719
1368477_at	NM_012914	ATPase, Ca++ transporting, ubiquitous	Atp2a3	1.29417	0.000712143	0.7478	0.0408772	1.2061	0.0168616	0.761605	0.191119
1371165_a_at	AF458230	ATPase, Ca++ transporting, ubiquitous	Atp2a3	2.11916	0.11479	0.360321	0.0912272	1.5364	0.997063	0.284541	0.0614426
1377386_at	AI029639	ATPase, Ca++-sequestering	Atp2c1	2.18286	0.0279324	1.53977	0.10095	1.25161	0.0520295	1.28031	0.848722
1387126_at	NM_131907	ATPase, Ca++-sequestering	Atp2c1	0.78359	0.359011	0.43995	0.0232901	0.867347	0.240305	0.6039	0.0023574
1391693_at	BM384161	ATPase, Class I, type 8B, member 1 (predicted)	Atp8b1_predicted	1.51577	0.34383	1.43757	0.280848	0.952526	0.996865	0.303155	0.04838
1398755_at	NM_130823	ATPase, H transporting, lysosomal V0 subunit c	Atp6v0c	0.995137	0.804857	1.48033	0.0945663	0.63495	0.0933105	1.27581	0.484493
1374431_at	BE120644	ATPase, H transporting, lysosomal V1 subunit A (predicted)	Atp6v1a1_predicted	0.867091	0.0718156	0.62988	0.00206174	0.791821	0.194611	0.886088	0.053913
1382048_at	BI289589	ATPase, H transporting, lysosomal V1 subunit A (predicted)	Atp6v1a1_predicted	0.815679	0.933689	0.653335	0.131955	0.839711	0.463906	0.798599	0.463465
1387664_at	NM_057213	ATPase, H transporting, lysosomal V1 subunit B2	Atp6v1b2	1.11752	0.634463	5.35858	0.00240837	1.03547	0.549416	4.36681	0.0019632
1371402_at	BM390600	ATPase, H transporting, lysosomal V1 subunit B2	Atp6v1b2	1.02552	0.724423	1.19047	0.0136634	1.00716	0.151705	1.20983	0.0568591
1398781_at	NM_053884	ATPase, H transporting, lysosomal V1 subunit F	Atp6v1f	0.975416	0.968251	1.57152	0.0285859	0.706981	0.0393275	1.39609	0.197614
1367873_at	NM_031785	ATPase, H+ transporting, lysosomal accessory protein 1	Atp6ap1	0.824901	0.0881517	0.742583	0.161605	0.67967	0.0135443	0.640074	0.0265396
1379255_at	AI012226	ATPase, H+ transporting, lysosomal accessory protein 2	Atp6ap2	1.08162	0.392872	1.57225	0.000604325	0.901822	0.491632	1.44596	0.000894791
1396279_at	BG663051	ATPase, H+ transporting, lysosomal accessory protein 2	Atp6ap2	0.672412	0.997429	1.23378	0.234951	1.11236	0.920595	1.25497	0.279013
1380730_at	BE110564	ATPase, H+ transporting, lysosomal V0 subunit a isoform 2 (predicted)	Atp6v0a2_predicted	0.751961	0.073416	1.35899	0.093742	1.35043	0.106932	0.785906	0.345002
1382576_at	BE349645	ATPase, H+ transporting, lysosomal V0 subunit a isoform 2 (predicted)	Atp6v0a2_predicted	0.635103	0.12982	0.939186	0.0200607	0.636115	0.111793	0.900507	0.0263626
1372648_at	BI291338	ATPase, H+ transporting, lysosomal V0 subunit a isoform 2 (predicted)	Atp6v0a2_predicted	1.02876	0.787932	0.774837	0.244329	0.80434	0.636761	0.677891	0.280443
1387045_at	NM_031604	ATPase, H+ transporting, lysosomal V0 subunit A1	Atp6v0a1	0.724787	0.040218	0.682103	0.0436849	0.948088	0.285562	0.897728	0.159603
1398930_at	BI278546	ATPase, H+ transporting, V0 subunit B (predicted)	Atp6v0b_predicted	0.983439	0.602309	1.74065	0.0029426	0.866037	0.0218809	1.62052	0.0153182
1388365_at	BI276424	ATPase, H+ transporting, V0 subunit D isoform 1	Atp6v0d1	0.658688	0.224773	0.632051	0.000414261	0.69867	0.0168968	0.762985	0.00166389
1367724_a_at	NM_053578	ATPase, H+ transporting, V0 subunit E isoform 1	Atp6v0e1	0.795833	0.761562	0.811861	0.0105842	0.730568	0.039044	0.812143	0.0828181
1372907_at	BI285242	ATPase, H+ transporting, V0 subunit E isoform 2	Atp6v0e2	0.506231	0.175595	0.91681	0.717796	0.594898	0.00438112	0.924412	0.126872
1374396_at	BI293306	ATPase, H+ transporting, V1 subunit C, isoform 1	Atp6v1c1	0.863795	0.174693	2.19482	0.000719669	0.65726	0.0713426	1.69106	0.0263318
1388325_at	BF281358	ATPase, H+ transporting, V1 subunit D	Atp6v1d	0.86311	0.123343	1.98027	0.000157947	0.755761	0.0075966	1.95098	0.00411423
1371564_at	AI169159	ATPase, H+ transporting, V1 subunit E isoform 1	Atp6v1e1	0.615015	0.212188	0.870204	0.0810042	0.626465	0.0308018	0.93546	0.440002
1367585_a_at	M28647	ATPase, Na+/K+ transporting, alpha 1 polypeptide	Atp1a1	0.552275	0.696848	0.506827	0.00360561	0.532047	0.132693	0.726403	0.0105532
1386911_at	NM_012505	ATPase, Na+/K+ transporting, alpha 2 polypeptide	Atp1a2	0.967272	0.0665049	1.00075	0.977087	0.968055	0.0696911	0.965381	0.973981
1367814_at	M14137	ATPase, Na+/K+ transporting, beta 1 polypeptide	Atp1b1	0.618946	0.275216	0.777353	0.00816785	0.657871	0.0595981	0.704554	0.0216578
1386937_at	AI232036	ATPase, Na+/K+ transporting, beta 1 polypeptide	Atp1b1	0.556234	0.279865	0.575536	0.000365219	0.588012	0.0773056	0.640336	0.00109096
1377195_at	BF406252	ATPase, Na+/K+ transporting, beta 3 polypeptide	Atp1b3	0.531587	0.0127833	1.36652	0.153035	0.915727	0.448319	1.52884	0.0682994
1398300_at	BI303655	ATPase, Na+/K+ transporting, beta 3 polypeptide	Atp1b3	0.515876	0.32698	0.611512	0.0149074	0.45103	0.0881584	0.621513	0.0303407
1394490_at	AI502114	ATP-binding cassette, sub-family A (ABC1), member 1	Abca1	1.01193	0.981384	0.378823	0.000137132	0.901985	0.509223	0.353119	0.0275177
1383355_at	AW918387	ATP-binding cassette, sub-family A (ABC1), member 1 /// hypothetical gene supported by NM_178095	Abca1 /// LOC497803	1.17985	0.39493	3.21598	0.0103322	0.753356	0.273275	2.26068	0.00359689
1384381_at	BF284523	ATP-binding cassette, sub-family A (ABC1), member 1 /// hypothetical gene supported by NM_178095	Abca1 /// LOC497803	1.84337	0.882088	3.30912	0.220056	0.710626	0.602322	1.31033	0.494425
1368081_at	NM_024396	ATP-binding cassette, sub-family A (ABC1), member 2	Abca2	0.825736	0.219249	0.753111	0.0690792	0.802506	0.0885036	0.788908	0.00506088
1384469_at	AI502224	ATP-binding cassette, sub-family A (ABC1), member 5	Abca5	0.880259	0.349767	0.988841	0.396512	0.985479	0.496869	1.01042	0.857938
1383229_at	BE103071	ATP-binding cassette, sub-family A (ABC1), member 7	Abca7	0.944797	0.808887	0.719395	0.324715	1.12842	0.617897	1.04665	0.275999
1370583_s_at	AY082609	ATP-binding cassette, sub-family B (MDR/TAP), member 1 /// ATP-binding cassette, sub-family B (MDR/TAP), member 1A	Abcb1 /// Abcb1a	10.5029	0.0174627	10.515	0.000915374	32.8007	0.0030227	23.1565	0.000951607
1390781_at	AA900411	ATP-binding cassette, sub-family B (MDR/TAP), member 10	Abcb10	0.660297	0.18523	0.58971	0.968171	0.680003	0.991146	1.15468	0.762921
1370465_at	AF257746	ATP-binding cassette, sub-family B (MDR/TAP), member 1A	Abcb1a	4.83223	0.0206579	17.2608	0.000585264	6.31353	0.00560191	14.1987	0.00469385
1370464_at	AF286167	ATP-binding cassette, sub-family B (MDR/TAP), member 1A	Abcb1a	1.37461	0.0273192	9.61976	0.00117679	1.91339	0.00860916	4.53762	0.00298944
1369161_at	NM_012690	ATP-binding cassette, sub-family B (MDR/TAP), member 4	Abcb4	2.63262	0.111739	1.34579	0.340157	2.21527	0.0354791	1.23275	0.321738
1368159_at	NM_080582	ATP-binding cassette, sub-family B (MDR/TAP), member 6	Abcb6	0.255395	0.0333244	1.08169	0.181822	0.323836	0.075325	0.942979	0.166407
1368484_at	NM_022238	ATP-binding cassette, sub-family B (MDR/TAP), member 9	Abcb9	0.806387	0.590738	0.519658	0.00472798	0.811005	0.630284	0.546691	0.00136048
1371005_at	AI059506	ATP-binding cassette, sub-family C (CFTR/MRP), member 1	Abcc1	1.87088	0.121699	2.60372	0.0456935	3.36689	0.0253845	2.60774	0.00173245
1381500_at	BF386748	ATP-binding cassette, sub-family C (CFTR/MRP), member 1	Abcc1	1.07744	0.381777	1.46497	0.136172	1.4975	0.15414	1.15767	0.523097
1369698_at	AF072816	ATP-binding cassette, sub-family C (CFTR/MRP), member 3	Abcc3	1.64907	0.04627	1.21416	0.0203689	1.3634	0.0405331	1.28654	0.0316096
1379402_at	BE100533	ATP-binding cassette, sub-family C (CFTR/MRP), member 4	Abcc4	0.415094	0.0530984	0.733175	0.138333	0.971759	0.851487	1.20328	0.366731
1387030_at	NM_053924	ATP-binding cassette, sub-family C (CFTR/MRP), member 5	Abcc5	1.95708	0.121219	1.23001	0.453465	3.26556	0.0221442	1.42345	0.475021
1389886_at	AI406942	ATP-binding cassette, sub-family C (CFTR/MRP), member 5	Abcc5	0.999794	0.846521	0.958431	0.706122	1.67629	0.0584106	0.955538	0.465079
1391178_at	BE110066	ATP-binding cassette, sub-family C (CFTR/MRP), member 8	Abcc8	0.797482	0.492242	0.795944	0.50892	1.67298	0.324973	1.2746	0.439486
1369632_a_at	AB052294	ATP-binding cassette, sub-family C (CFTR/MRP), member 8	Abcc8	1.03012	0.551462	0.647413	0.0729818	0.905174	0.544952	0.541326	0.0540557
1368561_at	NM_033352	ATP-binding cassette, sub-family D (ALD), member 2	Abcd2	1.32716	0.620711	0.277853	0.0548875	0.977189	0.916721	0.627326	0.14272
1368057_at	NM_012804	ATP-binding cassette, sub-family D (ALD), member 3	Abcd3	0.381936	0.00262452	0.201512	0.000835093	0.479141	0.00327334	0.261032	0.00781641
1392570_at	BI295850	ATP-binding cassette, sub-family D (ALD), member 4	Abcd4	0.98388	0.842697	1.00688	0.829785	1.00323	0.933157	1.0101	0.571769
1388810_at	BI278966	ATP-binding cassette, sub-family E (OABP), member 1	Abce1	0.660759	0.153392	0.862448	0.865809	0.732564	0.0816089	0.871417	0.805962
1398876_at	BG380494	ATP-binding cassette, sub-family F (GCN20), member 1	Abcf1	0.684453	0.147105	1.31394	0.0403256	0.898288	0.110485	1.36262	0.32328
1389608_at	AI235192	ATP-binding cassette, sub-family F (GCN20), member 2 (predicted)	Abcf2_predicted	0.899684	0.682404	1.2397	0.114285	0.7624	0.541315	1.21694	0.0146591
1371456_at	BI281218	ATP-binding cassette, sub-family F (GCN20), member 3	Abcf3	0.625599	0.196059	1.15892	0.101596	0.607425	0.0174011	0.986657	0.528795
1377280_at	BF390931	ATP-binding cassette, sub-family F (GCN20), member 3	Abcf3	0.996933	0.68926	0.969501	0.416048	0.998651	0.884511	0.966848	0.445933
1368103_at	NM_053502	ATP-binding cassette, sub-family G (WHITE), member 1	Abcg1	1.5916	0.0577917	1.11733	0.267508	1.93456	0.0174583	1.52974	0.0166355
1373995_at	AW523571	ATP-binding cassette, sub-family G (WHITE), member 1	Abcg1	1.76622	0.126609	0.276352	0.165825	2.59125	0.00106823	0.585443	0.638834
1380577_at	AI175616	ATP-binding cassette, sub-family G (WHITE), member 2	Abcg2	0.90716	0.540284	0.998814	0.907431	1.31826	0.00974363	1.00456	0.743712
1393217_at	BF282804	ATP-binding cassette, sub-family G (WHITE), member 3	Abcg3	8.22895	0.000144813	2.61365	0.00223069	14.3914	0.000173618	3.58316	0.00124685
1386972_at	NM_017228	atrophin 1	Atn1	1.3955	0.00350141	1.77099	0.0167456	0.910441	0.749071	1.28803	0.0430036
1387127_at	NM_031351	attractin	Atrn	0.575728	0.132465	0.388906	0.005828	0.528094	0.0347232	0.379911	0.0030482
1367945_at	NM_053359	ATX1 (antioxidant protein 1) homolog 1 (yeast)	Atox1	0.639217	0.825054	0.590574	0.0117448	0.739021	0.145217	0.496623	0.095294
1372149_at	BM389502	AU RNA binding protein/enoyl-coenzyme A hydratase (predicted)	Auh_predicted	0.768323	0.386919	0.483957	0.0323488	1.01412	0.967733	0.531469	0.0833317
1398916_at	AI104388	aurora kinase A interacting protein 1	Aurkaip1	0.661612	0.0640035	1.42966	0.00435466	0.610584	0.0228648	1.3779	0.00720817
1375008_at	BF410389	aurora kinase C (predicted)	Aurkc_predicted	0.698844	0.273733	1.14916	0.519692	0.872845	0.334129	1.03401	0.363311
1371614_at	AI169001	autophagy-related 12 (yeast)	Atg12	1.01329	0.706027	1.9662	0.000579768	0.729482	0.0714611	1.73375	0.00253775
1382735_at	BF563278	autophagy-related 12 (yeast)	Atg12	0.905995	0.846914	2.08496	0.0476592	0.840977	0.60759	1.76773	0.0787379
1399042_at	AI228455	autophagy-related 4B (yeast)	Atg4b	0.725209	0.0181129	1.78753	0.0140096	0.572746	0.0105388	1.20777	0.154366
1389273_at	BG374362	autophagy-related 4B (yeast)	Atg4b	0.554119	0.185789	0.497283	0.00149446	0.597933	0.236909	0.937083	0.0924417
1392744_at	AI179130	autophagy-related 7 (yeast)	Atg7	1.03219	0.139766	0.996304	0.0842183	1.16112	0.0689513	1.00924	0.931305
1387056_at	NM_024405	axin 1	Axin1	1.13569	0.432547	1.78971	0.0212961	1.09837	0.879284	1.38942	0.0710308
1368291_at	NM_021752	baculoviral IAP repeat-containing 2	Birc2	2.74417	0.142992	3.04913	0.000108648	3.16044	0.0210822	2.16039	0.017519
1370113_at	NM_023987	baculoviral IAP repeat-containing 3	Birc3	75.0864	0.00217946	52.503	0.000445865	75.272	0.00073765	52.9606	2.18405e-05
1369248_a_at	AF304333	baculoviral IAP repeat-containing 4	Birc4	0.998019	0.989078	1.01657	0.493457	1.55839	0.05835	0.999738	0.997575
1381871_at	BM383359	BAI1-associated protein 1 (predicted)	Baiap1_predicted	2.01368	0.0836087	1.04174	0.868685	0.926829	0.91343	0.999708	0.0651732
1375941_at	BI292120	BAI1-associated protein 2-like 1	Baiap2l1	3.09919	0.032176	2.44712	0.0021666	2.72435	0.0101565	2.11952	0.0102047
1368509_at	NM_053618	Bardet-Biedl syndrome 2 homolog (human)	Bbs2	0.497704	0.00691957	0.235899	0.000436058	0.56348	0.231748	0.52915	0.0061925
1378656_at	BE105572	Bardet-Biedl syndrome 5 homolog (human) (predicted)	Bbs5_predicted	1.00982	0.720501	1.10645	0.904062	0.73994	0.0457711	0.755193	0.103537
1380515_at	AI170730	Bardet-Biedl syndrome 7	Bbs7	1.14558	0.713501	1.19824	0.139069	0.736826	0.533321	1.2257	0.938963
1367820_at	NM_053631	barrier to autointegration factor 1	Banf1	1.03551	0.824225	1.71573	0.0104064	0.942347	0.69961	2.08275	0.00653933
1387212_at	NM_012863	basic helix-loop-helix domain containing, class B, 8	Bhlhb8	0.364697	0.0136349	0.818498	0.977829	0.363354	0.0161847	0.852296	0.144464
1381121_at	AW533010	Basic helix-loop-helix domain containing, class B2	Bhlhb2	2.52643	0.0120281	7.29282	0.000169017	1.92853	0.169101	2.22956	0.0521659
1379483_at	AI548256	Basic helix-loop-helix domain containing, class B2	Bhlhb2	4.06573	0.0807746	10.4006	0.0166224	2.27869	0.210317	9.22888	0.014435
1369415_at	NM_053328	basic helix-loop-helix domain containing, class B2	Bhlhb2	1.17711	0.680633	6.31662	0.0164993	1.06046	0.395633	3.69102	0.00369526
1368511_at	NM_133303	basic helix-loop-helix domain containing, class B3	Bhlhb3	1.13521	0.0328423	3.36968	0.000725588	0.721577	0.478847	2.83285	0.00509641
1388554_at	AI229287	basic leucine zipper and W2 domains 1	Bzw1	1.23431	0.259972	0.655095	0.0188556	1.22561	0.116389	0.770706	0.0338596
1371949_at	BM390332	basic leucine zipper and W2 domains 1	Bzw1	1.10036	0.39132	4.24639	0.000261396	0.977402	0.53028	3.21637	0.000503481
1370258_at	BI303268	basic leucine zipper and W2 domains 2	Bzw2	0.705014	0.335563	1.63716	0.055366	0.737009	0.189563	1.38208	0.0511381
1377329_at	BE113460	Basic leucine zipper and W2 domains 2	Bzw2	1.0072	0.990695	1.00369	0.936235	1.00851	0.994651	0.998932	0.982871
1371384_at	BG666659	basic transcription factor 3	Btf3	0.932185	0.711645	1.32095	0.361162	0.778097	0.37834	1.13639	0.919607
1381838_at	AI548281	Basic, immunoglobulin-like variable motif containing (predicted)	Bivm_predicted	0.94945	0.318185	0.791837	0.0574197	0.518551	0.317965	0.94146	0.883131
1367643_at	NM_012783	basigin	Bsg	0.82159	0.688729	0.624735	0.0196903	0.885599	0.398211	0.639429	0.00356282
1372588_at	AA944403	basophilic leukemia expressed protein BLES03	Bles03	1.26673	0.958285	1.20444	0.316751	2.49269	0.0186439	1.51528	0.0351321
1372956_at	BF420425	Bat4 gene	Bat4	1.11584	0.610301	1.00029	0.281103	0.822956	0.389612	0.930761	0.0956481
1387629_at	NM_022261	B-box and SPRY domain containing	Bspry	1.21719	0.54686	0.964505	0.590305	1.03569	0.278038	0.966091	0.525604
1368118_at	NM_031328	B-cell CLL/lymphoma 10	Bcl10	1.81647	0.208545	1.55538	0.0378594	1.84061	0.223396	1.7504	0.00243431
1391420_at	AA964818	B-cell CLL/lymphoma 11A (zinc finger protein)	Bcl11a	1.08489	0.331969	1.43897	0.871121	0.850754	0.220205	1.02482	0.997195
1383010_at	AW531880	B-cell CLL/lymphoma 11A (zinc finger protein)	Bcl11a	0.93288	0.882612	0.795903	0.108904	1.61646	0.122607	1.03099	0.103191
1392933_a_at	BF288704	B-cell CLL/lymphoma 7A (predicted)	Bcl7a_predicted	1.09881	0.265416	1.07871	0.562402	0.434227	0.116135	1.14116	0.342518
1391855_at	AW534002	B-cell CLL/lymphoma 7A (predicted)	Bcl7a_predicted	0.991121	0.904237	1.47633	0.012229	0.812456	0.0421919	1.27356	0.136104
1384335_at	BE111885	B-cell CLL/lymphoma 9-like (predicted)	Bcl9l_predicted	1.14772	0.0642836	0.881985	0.295455	1.98171	0.0503736	1.12758	0.0345043
1384944_at	BE116855	B-cell leukemia/lymphoma 11B (predicted)	Bcl11b_predicted	1.01293	0.17971	1.41487	0.557248	1.24969	0.580396	1.76828	0.576198
1398482_at	AI411774	B-cell leukemia/lymphoma 3 (predicted)	Bcl3_predicted	26.3838	0.00944498	15.9209	0.00229137	51.5933	0.00708044	15.3913	0.00563576
1379368_at	AI237606	B-cell leukemia/lymphoma 6 (predicted)	Bcl6_predicted	1.90207	0.105259	9.63455	0.0001597	2.23447	0.0979151	10.8622	0.00029069
1393641_at	AA925583	B-cell linker	Blnk	23.7671	0.000896773	12.632	7.77505e-05	11.6519	0.00187914	3.02919	0.0110131
1372709_at	AI172204	B-cell receptor-associated protein 29	Bcap29	0.86345	0.181762	3.46316	0.00846628	0.953149	0.0788673	2.9826	2.29151e-06
1367503_at	AI409930	B-cell receptor-associated protein 31	Bcap31	0.619862	0.663797	0.816376	0.131355	0.783533	0.10781	0.881084	0.173728
1367657_at	NM_017258	B-cell translocation gene 1, anti-proliferative	Btg1	1.41407	0.01925	1.47506	0.000587387	1.64879	0.0122534	1.73428	0.00155543
1386995_at	BI288701	B-cell translocation gene 2, anti-proliferative	Btg2	1.17448	0.780643	2.33161	0.00565995	0.756073	0.819147	1.5084	0.0421553
1386994_at	NM_017259	B-cell translocation gene 2, anti-proliferative	Btg2	0.867055	0.819544	0.6336	0.0128724	0.72898	0.0528137	0.648171	0.00070662
1368072_at	NM_019290	B-cell translocation gene 3	Btg3	0.641937	0.0741861	1.09992	0.136203	0.532273	0.0153229	0.918911	0.844801
1382993_at	AI236152	Bcl-2 binding component 3	Bbc3	2.39758	0.00844927	2.96042	0.00359189	2.68067	0.013901	1.96732	0.106795
1387805_at	NM_053420	BCL2/adenovirus E1B 19 kDa-interacting protein 3	Bnip3	0.533479	0.220391	1.65615	0.0161205	0.377155	0.0441241	1.68213	0.0122544
1386978_at	NM_080888	BCL2/adenovirus E1B 19 kDa-interacting protein 3-like	Bnip3l	0.587272	0.0766495	0.584434	0.000850195	0.532114	0.00447833	0.571909	0.018927
1367898_at	AF441118	BCL2/adenovirus E1B 19 kDa-interacting protein 3-like	Bnip3l	0.937688	0.420665	0.80882	0.0306998	0.66621	0.0027432	0.717829	0.0330498
1380092_at	AI146096	BCL2/adenovirus E1B 19kDa-interacting protein 1	Bnip1	1.03922	0.638263	0.782325	0.0746362	0.904526	0.0586821	1.08201	0.0843065
1367863_at	NM_080897	BCL2/adenovirus E1B 19kDa-interacting protein 1	Bnip1	0.91779	0.713868	0.951894	0.453728	0.720423	0.0483966	1.09947	0.577491
1377634_at	AI715220	BCL2/adenovirus E1B 19kDa-interacting protein 1, NIP2 (predicted)	Bnip2_predicted	2.45178	0.00964941	1.3997	0.00377543	1.5283	0.0921434	1.36467	0.0421549
1390133_at	AI178277	BCL2/adenovirus E1B 19kDa-interacting protein 1, NIP2 (predicted)	Bnip2_predicted	1.21156	0.167813	0.652103	0.0920845	2.1806	0.0294304	0.826157	0.11292
1368066_at	NM_053812	BCL2-antagonist/killer 1	Bak1	6.45409	0.0794851	3.83232	0.000309285	5.76569	0.000239495	6.807	0.0112861
1375550_at	BI280304	Bcl2-associated athanogene 1 (predicted)	Bag1_predicted	0.940755	0.789039	1.83918	0.00864562	0.985945	0.19514	1.21636	0.111353
1390026_at	AI231792	Bcl2-associated athanogene 3	Bag3	0.942997	0.70511	2.65398	0.0993364	0.69737	0.524974	1.54558	0.250646
1382376_at	BI297220	BCL2-associated athanogene 4	Bag4	1.12223	0.466012	1.07162	0.898357	0.979332	0.922968	1.48093	0.0341631
1376261_at	BI282898	BCL2-associated athanogene 5	Bag5	1.0344	0.0520387	1.5	0.0213681	0.481526	0.00900902	1.16489	0.0355461
1373868_at	AI717547	BCL2-associated transcription factor 1	Bclaf1	1.57917	0.00463743	2.62886	0.00167375	1.77111	0.00806587	2.29956	0.00368223
1391875_at	AI176106	BCL2-associated transcription factor 1	Bclaf1	1.4151	0.217119	2.74704	0.0826829	1.17782	0.0896251	1.97806	0.0228651
1388752_at	AI408078	BCL2-associated transcription factor 1	Bclaf1	0.946609	0.502491	0.819552	0.0127012	1.45346	0.0983383	1.0121	0.149126
1369122_at	AF235993	Bcl2-associated X protein	Bax	1.1652	0.0772864	2.33712	0.000115752	1.238	0.199935	2.31724	0.0017759
1372279_at	AA892271	BCL2-like 13 (apoptosis facilitator) (predicted)	Bcl2l13_predicted	0.883307	0.655862	2.70952	0.0963226	0.957189	0.512561	2.69656	0.00363324
1380540_at	AI547392	BCL2-like 13 (apoptosis facilitator) (predicted)	Bcl2l13_predicted	1.36416	0.735224	2.32581	0.685715	1.01568	0.624943	1.06918	0.852426
1376115_at	AA964244	BCL2-like 13 (apoptosis facilitator) (predicted)	Bcl2l13_predicted	0.843913	0.803474	1.59821	0.0306195	1.01257	0.167553	1.36099	0.0622867
1393707_at	AW527957	Bcl2-like 2	Bcl2l2	0.464488	0.0205623	0.492933	0.00148704	0.500001	0.0132995	0.565851	0.00116387
1385592_at	BI289386	Bcl6 interacting corepressor (predicted)	Bcor_predicted	1.34219	0.188102	2.48135	0.00622601	1.52591	0.133229	1.76363	0.000672407
1374886_at	BF402630	BCS1-like (yeast)	Bcs1l	0.318342	0.000336804	1.2839	0.0942819	0.496874	0.0780227	0.956879	0.402351
1377570_at	AI059563	Beaded filament structural protein 1	Bfsp1	1.00148	0.99406	0.998792	0.286812	1.00383	0.406903	1.00047	0.503755
1367457_at	NM_053739	beclin 1 (coiled-coil, myosin-like BCL2-interacting protein)	Becn1	0.836947	0.11063	0.907795	0.0134821	0.855671	0.142566	0.849163	0.0826937
1371811_at	BI278232	Bernardinelli-Seip congenital lipodystrophy 2 homolog (human)	Bscl2	0.351829	0.0353454	0.438756	0.0217214	0.256335	0.019485	0.437891	0.0144301
1370913_at	AI409634	Best5 protein	Best5	1019.52	0.0111886	107.26	0.0149493	1285.11	0.0103095	150.754	0.0105146
1371633_at	BI285669	beta catenin-like 1	Ctnnbl1	0.632323	0.0611999	0.640097	0.000806886	0.758379	0.108827	0.597823	0.0124067
1370907_at	M83143	beta galactoside alpha 2,6 sialyltransferase 1	St6gal1	0.225354	0.0388695	0.152654	8.9174e-05	0.255602	0.0612066	0.208476	0.016244
1385144_at	AW524749	Beta galactoside alpha 2,6 sialyltransferase 2	St6gal2	1.42273	0.0513889	0.56129	0.052145	1.2973	0.244298	0.338109	0.0234631
1373014_at	BE111966	beta-1,3-glucuronyltransferase 3 (glucuronosyltransferase I) (predicted)	B3gat3_predicted	0.455378	0.0327739	0.79476	0.0503505	0.495031	0.0392652	0.709307	0.028312
1371440_at	AW916647	Beta-2 microglobulin	B2m	7.03972	0.000104999	6.19477	0.000595857	9.63364	0.000109518	9.1108	0.0022099
1367595_s_at	NM_012512	beta-2 microglobulin	B2m	1.85115	0.00647723	1.61681	4.25292e-05	2.1314	0.00602375	1.80574	0.000616191
1373247_at	AW435407	Beta-site APP cleaving enzyme 1	Bace1	0.756774	0.155288	0.869919	0.0920017	0.934704	0.663318	0.88099	0.0463044
1377390_at	BG381587	beta-site APP-cleaving enzyme 2	Bace2	2.94684	0.0631202	2.96838	0.00429672	2.40521	0.0613175	3.04238	0.00282856
1374654_at	BE109603	beta-transducin repeat containing	Btrc	1.1913	0.202701	2.25973	0.0911852	0.580944	0.113197	1.61798	0.0231885
1392557_at	BF389151	Bicaudal C homolog 1 (Drosophila) (predicted)	Bicc1_predicted	0.747766	0.290709	0.726858	0.0866481	0.965177	0.866739	0.794868	0.0675202
1383822_at	AI029990	bicaudal D homolog 2 (Drosophila)	Bicd2	1.43394	0.165116	2.11137	0.00665224	0.735131	0.10199	1.44015	0.0341153
1388733_at	AI177631	bifunctional apoptosis regulator	Bfar	1.68922	0.00435089	1.21283	0.0312847	1.54728	0.000599627	1.20978	0.00362806
1395377_at	BE107113	bifunctional apoptosis regulator	Bfar	1.55039	0.0637693	1.23117	0.666903	1.93609	0.0227266	0.9993	0.995773
1368164_at	NM_053850	biliverdin reductase A	Blvra	0.560289	0.0214125	0.801786	0.900671	0.705486	0.0959603	1.00084	0.906017
1392539_at	AI009013	biliverdin reductase B (flavin reductase (NADPH)) (predicted)	Blvrb_predicted	1.21489	0.946127	0.769904	0.768359	0.702362	0.0682301	0.775712	0.397829
1372137_at	BI279854	biogenesis of lysosome-related organelles complex-1, subunit 1 (predicted)	Bloc1s1_predicted	0.871441	0.33235	0.846101	0.115441	0.677273	0.867987	0.911042	0.39352
1398473_at	BI290651	biogenesis of lysosome-related organelles complex-1, subunit 2	Bloc1s2	0.958289	0.990207	1.48387	0.0204919	0.976427	0.841695	1.20754	0.0101571
1386773_at	BF524794	biotinidase	Btd	0.753519	0.126565	0.3045	0.0108317	0.791366	0.130917	0.251481	0.00527203
1388617_at	AW914746	biphenyl hydrolase-like (serine hydrolase, breast epithelial mucin-associated antigen)	Bphl	0.391785	0.00728474	0.366727	0.000518034	0.386668	0.00077161	0.314554	0.000296867
1398317_at	BF283428	bisphosphate 3'-nucleotidase 1	Bpnt1	1.49589	0.26382	1.03533	0.102728	1.60725	0.0518104	1.62757	0.0183368
1372160_at	BM389738	bladder cancer associated protein homolog (human)	Blcap	0.817942	0.729339	0.734354	0.00709219	0.805505	0.234498	0.759197	0.00656697
1371808_at	AI012747	bleomycin hydrolase	Blmh	0.543681	0.03337	1.19889	0.062312	0.375551	0.00456332	1.03786	0.942041
1392910_at	AA859968	block of proliferation 1	Bop1	0.971392	0.995466	1.93568	0.00294672	0.621316	0.00221657	1.88207	0.00212647
1372710_at	AI175027	blocked early in transport 1 homolog (S. cerevisiae)	Bet1	0.613665	0.500462	0.532085	0.0182895	0.75518	0.389623	0.587728	0.00349835
1368881_at	NM_019251	blocked early in transport 1 homolog (S. cerevisiae)	Bet1	0.689047	0.914494	2.05938	0.158468	0.60858	0.157536	1.27658	0.21236
1372950_at	AI600006	blocked early in transport 1 homolog (S. cerevisiae) like	Bet1l	0.686179	0.0646367	0.685581	0.0614701	0.713766	0.0370303	0.828061	0.422149
1370823_at	AF387513	BMP and activin membrane-bound inhibitor, homolog (Xenopus laevis)	Bambi	0.567223	0.137435	0.739636	0.149659	0.288169	0.00981191	0.915746	0.486496
1379174_at	BE121123	BMP/retinoic acid-inducible neural-specific protein 2	Brinp2	1.09474	0.779087	0.883984	0.982084	1.01498	0.996879	0.998569	0.99257
1386774_at	BF551863	BMP/retinoic acid-inducible neural-specific protein 2	Brinp2	0.996728	0.94912	0.609689	0.0918867	0.996101	0.99456	1.00615	0.0885958
1392397_at	BF389365	BMP-2 inducible kinase	Bmp2k	0.323254	0.0110954	0.53398	0.476749	0.327417	0.0142831	0.889074	0.502364
1373768_at	AI406390	BMS1-like, ribosome assembly protein (yeast)	Bms1l	0.532185	0.0142878	1.06125	0.374457	0.640509	0.0566884	0.893424	0.892566
1383829_at	BF392234	bobby sox homolog (Drosophila) (predicted)	Bbx_predicted	1.59095	0.00741055	1.14317	0.0578705	2.86465	0.00783914	1.20893	0.312921
1385235_at	AA818804	bol, boule-like (Drosophila) (predicted)	Boll_predicted	1.22157	0.79123	2.5573	0.180563	0.937693	0.0927271	1.3295	0.338851
1372157_at	AI232807	bolA-like 1 (E. coli) (predicted)	Bola1_predicted	0.722444	0.0837727	0.937712	0.260425	0.789991	0.0752763	0.76467	0.270343
1390738_at	BM385476	bone marrow stromal cell antigen 2	Bst2	4.60416	0.00496133	6.59983	0.00109397	7.44735	0.00420126	11.3986	0.000993668
1371452_at	BE110662	bone marrow stromal cell-derived ubiquitin-like protein	Bmsc-UbP	0.851127	0.952349	0.990683	0.8634	0.858629	0.470371	1.17386	0.874718
1368945_at	NM_017178	bone morphogenetic protein 2	Bmp2	1.08069	0.93145	1.83598	0.0304777	1.58102	0.01473	2.27255	0.0054098
1369773_at	NM_017105	bone morphogenetic protein 3	Bmp3	1.00775	0.994253	0.698714	0.0584069	0.860968	0.277753	0.958919	0.0424336
1387232_at	NM_012827	bone morphogenetic protein 4	Bmp4	1.00106	0.996242	1.04349	0.115366	1.00062	0.899287	1.0439	0.357218
1388920_at	AI230985	bone morphogenetic protein 6	Bmp6	1.31649	0.205787	3.33375	0.0279648	1.00645	0.58887	1.00317	0.760743
1368899_at	NM_030849	bone morphogenetic protein receptor, type 1A	Bmpr1a	1.05848	0.666312	1.17171	0.0217183	1.15505	0.379007	1.14894	0.0468871
1376843_at	BE118651	bone morphogenic protein receptor, type II (serine/threonine kinase)	Bmpr2	0.548377	0.392832	0.972224	0.596769	0.961193	0.862908	1.18404	0.284393
1382728_at	AA924018	Bone morphogenic protein receptor, type II (serine/threonine kinase)	Bmpr2	0.96878	0.716029	0.86894	0.405201	1.12808	0.823693	1.00985	0.892262
1374313_at	BI294383	BPY2 interacting protein 1 (predicted)	Bpy2ip1_predicted	1.18815	0.930143	1.06846	0.345083	1.00352	0.968725	1.06634	0.978322
1398350_at	BG380454	brain abundant, membrane attached signal protein 1	Basp1	1.714	0.00798631	1.6676	0.00709612	1.65465	0.0100302	1.7433	0.0196893
1369310_at	NM_022300	brain abundant, membrane attached signal protein 1	Basp1	1.10418	0.0679474	2.47565	0.0743238	0.997083	0.933309	1.41772	0.282867
1398305_at	U30831	brain and kidney protein	Bk	0.521165	0.235336	0.492109	0.146186	0.353074	0.0366787	1.26456	0.903025
1370418_s_at	U30831	brain and kidney protein /// hypothetical gene supported by NM_138849	Bk /// LOC497736	0.123962	0.029383	0.467027	0.032017	0.363542	0.010995	0.667253	0.0516194
1390040_at	AA851481	brain and reproductive organ-expressed protein	Bre	0.877704	0.164848	0.694795	0.0215091	0.997016	0.946219	0.546811	0.0132107
1388723_at	AI171289	brain and reproductive organ-expressed protein	Bre	0.6216	0.498837	0.98163	0.200251	0.737327	0.105311	0.816538	0.33843
1388802_at	AI579422	brain expressed X-linked 1	Bex1	0.735145	0.58465	0.946146	0.407341	0.420628	0.00148504	0.761878	0.125329
1373458_at	BI289546	brain expressed X-linked 4	Bex4	0.695083	0.827153	1.35963	0.177553	0.617575	0.102062	1.3189	0.0697979
1388146_at	AW523578	Brain Ntab mRNA sequence	---	0.751642	0.023904	7.63901	0.000808962	0.609047	0.00491406	3.32476	0.00658133
1376519_at	BI280846	brain protein 16	Brp16	0.743984	0.215354	1.00791	0.987242	0.529495	0.048141	0.931693	0.207731
1386867_at	NM_133561	brain protein 44-like	Brp44l	0.968069	0.943077	1.21742	0.400149	1.17939	0.399634	1.53533	0.0663764
1371833_at	AI230753	brain protein I3	Bri3	1.13442	0.967016	2.04035	0.0100547	0.859424	0.487836	1.53202	0.034847
1373380_at	AI169085	brain zinc finger protein	LOC362154	1.24482	0.0927917	1.51309	0.000245316	1.25168	0.0606281	1.58053	0.048304
1385921_at	BF550329	brain zinc finger protein /// similar to brain Zn-finger protein (predicted)	LOC362154 /// RGD1562140_predicted	1.00813	0.952148	1.3089	0.0383332	1.02751	0.713678	1.34723	0.181231
1373081_at	AI105000	Brain-specific angiogenesis inhibitor 1-associated protein 2	Baiap2	0.779699	0.0268039	0.738998	0.199764	0.715567	0.0171427	0.781461	0.717707
1374117_at	BI279562	brain-specific angiogenesis inhibitor 1-associated protein 2	Baiap2	1.02085	0.287273	1.00188	0.913253	0.732192	0.0913937	0.98963	0.844701
1370869_at	AI102790	branched chain aminotransferase 1, cytosolic	Bcat1	2.43851	0.189838	18.5747	0.000260292	2.16635	0.385583	7.12947	0.00150791
1390726_at	BF393120	Branched chain aminotransferase 1, cytosolic	Bcat1	0.972047	0.514149	0.818912	0.0608799	1.04697	0.350163	0.569455	0.0804905
1369520_a_at	NM_017253	branched chain aminotransferase 1, cytosolic	Bcat1	1.06962	0.860267	1.56749	0.100655	1.24396	0.0464036	1.20021	0.13792
1370906_at	BM385109	branched chain keto acid dehydrogenase E1, beta polypeptide	Bckdhb	0.703087	0.266008	1.17531	0.0740545	1.26383	0.448242	1.3989	0.00813362
1370897_at	J02827	branched chain ketoacid dehydrogenase E1, alpha polypeptide	Bckdha	1.00357	0.751429	0.986251	0.89804	1.0029	0.0226594	0.996576	0.987209
1370842_at	BI277527	branched chain ketoacid dehydrogenase kinase	Bckdk	0.754554	0.113632	1.00023	0.998447	0.665666	0.0641789	0.994069	0.960288
1374323_at	BM389139	BRCA2 and CDKN1A interacting protein (predicted)	Bccip_predicted	0.782307	0.161368	0.837754	0.229817	0.704377	0.00567442	0.898701	0.240825
1381141_at	BF396613	Breast cancer 2	Brca2	1.18041	0.993615	1.20418	0.462543	1.18608	0.471563	1.08985	0.999074
1367752_at	NM_012931	breast cancer anti-estrogen resistance 1	Bcar1	1.20952	0.670025	1.78179	0.619759	1.21165	0.538496	1.03279	0.994764
1373428_at	AA851241	breast cancer metastasis-suppressor 1	Brms1	1.06244	0.644135	0.899534	0.827792	0.959963	0.807155	0.941188	0.153765
1373098_at	BF394321	breast carcinoma amplified sequence 1	Bcas1	0.997034	0.600578	1.22657	0.938803	0.969844	0.471715	1.22906	0.17705
1371868_at	AA851386	breast carcinoma amplified sequence 2 (predicted)	Bcas2_predicted	1.04563	0.822512	1.56434	0.081516	1.07413	0.745187	1.20025	0.698086
1379775_at	AI556888	BRF1 homolog, subunit of RNA polymerase III transcription initiation factor IIIB (S. cerevisiae) (predicted)	Brf1_predicted	0.701583	0.078515	1.25083	0.189233	0.777858	0.333145	0.934203	0.383613
1374891_at	BF406141	BRF2, subunit of RNA polymerase III transcription initiation factor, BRF1-like	Brf2	1.01404	0.909904	0.895857	0.300037	1.01456	0.472093	0.903569	0.357647
1379588_at	AA874805	Bridging integrator 1	Bin1	0.649537	0.0405296	0.312195	0.000629454	1.01588	0.232258	0.496719	0.0310001
1367779_at	NM_053959	bridging integrator 1	Bin1	1.06224	0.0980599	0.860656	0.0573098	1.31446	0.256185	0.711207	0.0308297
1396899_at	BE119227	Bridging integrator 1	Bin1	1.1348	0.86652	0.781594	0.612252	1.80611	0.251883	0.705669	0.0726858
1399105_at	AA926279	bridging integrator 3	Bin3	0.705301	0.636917	2.09031	0.0132441	0.967934	0.92847	1.68394	0.150534
1392514_at	BE095565	brix domain containing 1 (predicted)	Bxdc1_predicted	0.674806	0.0989472	2.69425	0.0148367	0.649612	0.0622416	1.64035	0.00407911
1389569_at	AW917092	brix domain containing 2	Bxdc2	0.844275	0.0814147	2.4491	0.00584845	0.76468	0.00685938	1.69559	0.00592544
1395479_at	BG373428	brix domain containing 2	Bxdc2	0.988061	0.318895	1.6452	0.264495	0.758764	0.48485	1.48867	0.28627
1396420_at	BF395914	Bromodomain adjacent to zinc finger domain protein 1B	Baz1b	1.1939	0.582537	0.90652	0.811227	1.32058	0.208789	1.03804	0.677789
1385853_at	BF560180	bromodomain adjacent to zinc finger domain, 1A (predicted)	Baz1a_predicted	1.65149	0.0994282	2.22648	0.00709847	0.962035	0.621675	1.02441	0.112012
1377727_at	BE109134	bromodomain adjacent to zinc finger domain, 1A (predicted)	Baz1a_predicted	1.42143	0.178145	2.34747	0.0441835	2.04859	0.0512187	1.8544	0.0293486
1376533_at	BF398368	bromodomain adjacent to zinc finger domain, 2B (predicted)	Baz2b_predicted	0.559144	0.00352415	0.851884	0.502239	0.823307	0.185067	0.912193	0.34239
1392421_at	AW526570	bromodomain adjacent to zinc finger domain, 2B (predicted)	Baz2b_predicted	0.975031	0.389415	1.17338	0.77414	1.00008	0.203848	0.833586	0.469588
1397486_x_at	BF404567	Bromodomain adjacent to zinc finger domain, 2B (predicted)	Baz2b_predicted	1.04907	0.7671	1.11292	0.700686	1.04996	0.334819	0.946484	0.464783
1373430_at	BG378867	bromodomain adjacent to zinc finger domain, 2B (predicted)	Baz2b_predicted	1.06299	0.961901	0.579482	0.0092923	1.21098	0.607226	0.778081	0.0389395
1380499_at	AI029043	Bromodomain and WD repeat domain containing 1 (predicted)	Brwd1_predicted	0.712285	0.408989	1.59635	0.0699075	1.00719	0.908608	1.19997	0.30449
1398654_at	AI501129	Bromodomain and WD repeat domain containing 1 (predicted)	Brwd1_predicted	1.19611	0.599075	1.435	0.0462233	0.85621	0.849521	1.04239	0.753195
1384024_at	BI301225	bromodomain containing 1 (predicted)	Brd1_predicted	1.28596	0.036263	1.04358	0.0376758	1.2637	0.0400226	1.162	0.0681953
1380145_at	AW529414	Bromodomain containing 1 (predicted)	Brd1_predicted	0.92148	0.862281	1.05597	0.914054	1.04637	0.466915	0.767452	0.0464209
1371719_at	AA946361	bromodomain containing 2	Brd2	1.192	0.596555	1.48756	0.241564	0.990123	0.79036	1.25965	0.0543254
1389029_at	BE108923	Bromodomain containing 3 (predicted)	Brd3_predicted	0.721421	0.0590973	0.42017	0.00275966	0.706623	0.0746417	0.501166	0.00205831
1372351_at	AI229448	bromodomain containing 4	Brd4	1.67095	0.00398423	1.53073	0.0143247	1.5583	0.031958	1.54811	0.00295349
1375650_at	BM389207	bromodomain containing 4	Brd4	1.28751	0.046986	2.31891	0.0116145	1.44671	0.0144431	2.7704	0.0570407
1395648_at	BF389377	Bromodomain containing 4	Brd4	1.37446	0.062312	0.884678	0.554028	1.79865	0.277808	0.830411	0.31509
1393567_at	BF389164	bromodomain containing 4	Brd4	1.00046	0.632466	1.18566	0.19977	1.00423	0.932692	1.00366	0.992542
1399055_at	BI275924	bromodomain containing 7 (predicted)	Brd7_predicted	0.622063	0.418788	0.971871	0.14716	0.858543	0.219822	1.01943	0.838557
1372207_at	AI549477	bromodomain containing 8	Brd8	1.5341	0.124299	0.824327	0.223769	1.40726	0.951795	1.13133	0.16189
1377777_at	BM391018	bromodomain containing 9 (predicted)	Brd9_predicted	1.25005	0.150189	0.69119	0.0995133	1.25886	0.12073	0.878655	0.417835
1381995_at	AW530502	bruno-like 4, RNA binding protein (Drosophila) (predicted)	Brunol4_predicted	3.14467	0.0435711	0.971874	0.711125	4.52227	0.0397076	1.06626	0.675571
1372720_at	AA848449	BTB (POZ) domain containing 1	Btbd1	0.494	0.0872326	0.214844	7.51983e-05	0.63719	0.0740435	0.355625	0.0158302
1376333_at	BI275800	BTB (POZ) domain containing 1	Btbd1	0.2013	0.117791	0.330709	0.0166099	0.611827	0.00589215	0.694225	0.0767405
1376274_at	AI233751	BTB (POZ) domain containing 10	Btbd10	1.01355	0.98104	1.38771	0.0160702	0.527826	0.07397	1.11794	0.502858
1380459_at	AI555023	BTB (POZ) domain containing 14A	Btbd14a	1.37259	0.272947	1.05941	0.42424	1.36198	0.0582666	1.10081	0.292135
1379439_at	AA850609	BTB (POZ) domain containing 15	Btbd15	1.31312	0.103762	1.65696	0.000268442	1.14948	0.498698	1.36537	0.0698872
1382478_at	AI230481	BTB (POZ) domain containing 3 (predicted)	Btbd3_predicted	0.996607	0.425697	0.79402	0.186673	1.00536	0.981595	0.737756	0.254731
1383083_at	AI575458	Btg3 associated nuclear protein (predicted)	Banp_predicted	1.95795	0.00983428	1.46311	0.0609614	2.89029	0.126817	1.38685	0.986046
1372052_at	BI275918	Budding uninhibited by benzimidazoles 3 homolog (S. cerevisiae)	Bub3	0.773123	0.449523	1.09753	0.0636219	0.618607	0.0659241	1.14907	0.234858
1392959_at	AA925983	Bwk1 leukemia-related gene	Bwk1	1.44004	0.0334384	1.03596	0.57576	1.33466	0.0687958	1.45403	0.0077108
1377638_at	AI549060	Bwk1 leukemia-related gene	Bwk1	1.73262	0.342253	0.898784	0.467317	0.636084	0.487258	1.10224	0.660668
1385184_at	AI145766	Bwk1 leukemia-related gene	Bwk1	0.994127	0.949953	0.874625	0.39464	1.00142	0.350657	0.986082	0.0184008
1389200_at	AA851296	bystin-like	Bysl	0.556012	0.24789	1.54657	0.0554192	0.405536	0.00504652	1.06607	0.450548
1388680_at	BM385686	C1GALT1-specific chaperone 1	C1galt1c1	0.651851	0.277073	0.279003	0.00536244	0.575329	0.0841512	0.378443	0.00563277
1390754_at	BF412921	Ca2+-dependent secretion activator	Cadps	3.34688	0.00241015	0.825941	0.00537489	5.07349	0.00957355	0.971239	0.541932
1368523_at	NM_013219	Ca2+-dependent secretion activator	Cadps	1.28247	0.0242356	0.424897	0.00204484	1.17236	0.136275	0.645733	0.182962
1379663_at	AI010254	Cache domain containing 1 (predicted)	Cachd1_predicted	2.50011	0.0108382	1.01949	0.193491	1.35429	0.180925	1.15242	0.34114
1386947_at	NM_031334	cadherin 1	Cdh1	2.90673	0.00186609	1.94755	0.00386833	2.5164	0.0143809	1.88583	0.00130956
1393066_at	AI070787	Cadherin 1	Cdh1	0.276954	0.00229878	0.205593	0.0059069	0.322356	0.0749995	0.185983	0.0229174
1392140_at	BF419584	Cadherin 11	Cdh11	1.70404	0.582343	0.925121	0.994988	1.70983	0.161195	0.943275	0.937777
1388936_at	BI296340	cadherin 11	Cdh11	1.00922	0.957569	0.637965	0.0983103	0.758676	0.231786	0.550415	0.0220267
1383985_at	AW523000	cadherin 15	Cdh15	1.00854	0.916226	1.03633	0.405535	1.74151	0.0523217	0.998044	0.934143
1368642_at	NM_031333	cadherin 2 /// hypothetical gene supported by NM_031333	Cdh2 /// LOC497718	1.2948	0.368411	0.40871	0.00236166	0.924675	0.666437	0.52739	0.0281768
1387259_at	AF097593	cadherin 2 /// hypothetical gene supported by NM_031333	Cdh2 /// LOC497718	0.754958	0.39447	0.878979	0.853067	0.912113	0.645174	1.01792	0.828345
1388045_a_at	D83348	cadherin 22	Cdh22	1.17434	0.0409561	0.422401	0.011861	1.94628	0.0228267	0.894328	0.581023
1378065_at	BI274450	Cadherin 22	Cdh22	1.36174	0.229007	0.605946	0.0652721	1.48013	0.529223	0.301265	0.0194535
1382089_at	AI070489	Cadherin 22	Cdh22	0.825006	0.442827	0.863466	0.506747	1.49203	0.964941	0.413099	0.0790881
1395335_at	BF544005	Cadherin 22	Cdh22	0.903989	0.520742	0.566379	0.0184431	0.907228	0.596859	0.552957	0.082586
1368887_at	NM_019161	cadherin 22	Cdh22	0.91156	0.590876	0.653316	0.174493	1.00427	0.968065	0.733293	0.172297
1392706_at	AI548870	Cadherin 23 (otocadherin)	Cdh23	0.97105	0.527474	0.972502	0.856301	0.777167	0.1978	0.8483	0.691331
1397177_at	BF409052	Cadherin 7, type 2	Cdh7	0.988794	0.391339	0.994828	0.180909	0.857658	0.238182	1.00983	0.772592
1375619_at	BF417982	Cadherin 8	Cdh8	1.4401	0.486264	0.922548	0.980067	1.78334	0.476487	1.19972	0.75432
1374910_at	BE103601	cadherin EGF LAG seven-pass G-type receptor 2	Celsr2	0.852589	0.787541	0.168757	0.00365638	0.397199	0.0974443	0.191501	0.0217452
1368472_at	NM_031320	cadherin EGF LAG seven-pass G-type receptor 3	Celsr3	1.10427	0.370717	1.38084	0.0193514	1.06075	0.518202	1.37529	0.0130612
1370201_at	X04280	calbindin 1	Calb1	1.00891	0.278179	1.04004	0.439905	1.06724	0.869576	1.43573	0.591471
1370368_at	AF061947	calcineurin binding protein 1	Cabin1	1.23616	0.0455054	0.74861	0.578287	1.65292	0.243028	0.893018	0.874169
1369994_at	NM_053670	calcitonin gene-related peptide-receptor component protein	Crcp	0.958606	0.677558	1.83261	0.160253	0.885841	0.579767	1.38312	0.173065
1370562_at	M11596	calcitonin-related polypeptide, beta	Calcb	13.0212	0.00168878	5.40334	0.000556097	7.95751	0.0119549	6.96892	0.000362755
1396446_at	BF522502	calcium activated nucleotidase 1	Cant1	0.486536	0.504851	0.621687	0.847429	0.331542	0.0907335	0.662938	0.126408
1389588_at	H35646	calcium activated nucleotidase 1	Cant1	0.673965	0.507041	0.944946	0.0536144	0.709709	0.0249927	1.06325	0.509224
1367675_at	NM_031145	calcium and integrin binding 1 (calmyrin)	Cib1	1.46638	0.227839	3.10495	0.00395309	1.29193	0.885313	1.61502	0.0368336
1370285_at	AY078385	calcium binding and coiled coil domain 1	Calcoco1	0.574601	0.211389	0.679094	0.0487307	1.01288	0.615739	0.757674	0.183732
1376715_at	AA901065	calcium binding atopy-related autoantigen 1	Cbara1	0.664535	0.502877	1.16828	0.10507	0.727669	0.15627	1.2177	0.111477
1396749_at	BF390144	calcium binding protein 1	Cabp1	0.219915	0.0159209	4.58098	0.0191564	0.548417	0.270154	3.6406	0.0326597
1372243_at	BE112280	calcium binding protein 39 (predicted)	Cab39_predicted	0.995466	0.401521	1.6868	0.0312484	0.800356	0.101942	1.53961	0.364339
1372244_at	BI285336	calcium binding protein 39 (predicted)	Cab39_predicted	0.844053	0.599037	1.02789	0.873372	0.602447	0.131574	0.911854	0.295474
1377391_at	BF390552	Calcium binding protein 39-like	Cab39l	1.02157	0.378561	1.02451	0.950959	1.0126	0.86846	0.953518	0.728382
1383341_at	BG662592	calcium binding protein 39-like	Cab39l	0.88506	0.996031	5.09158	0.0154094	1.19422	0.496682	4.32721	0.0320927
1371469_at	BM958511	calcium binding protein p22	Chp	0.828881	0.999278	0.71284	0.03341	0.852838	0.961285	0.704163	0.0417697
1387388_at	AB070350	calcium binding protein p22 /// similar to calcium binding protein P22 (predicted) /// similar to calcium binding protein P22 (predicted)	Chp /// RGD1565588_predicted /// RGD1564956_predicted	1.03044	0.898127	0.913437	0.723768	1.00037	0.975046	0.885608	0.773553
1397151_at	BE108017	Calcium channel, voltage-dependent, alpha 2/delta 3 subunit	Cacna2d3	0.899286	0.65278	1.48007	0.854482	0.90006	0.475981	1.11543	0.88264
1397823_at	BE117531	Calcium channel, voltage-dependent, alpha2/delta subunit 1	Cacna2d1	1.99007	0.0395095	1.36457	0.134189	1.29631	0.542257	1.21338	0.222218
1369649_at	AF400662	calcium channel, voltage-dependent, alpha2/delta subunit 1	Cacna2d1	0.834687	0.624785	0.476101	0.066287	0.860258	0.657395	0.669179	0.220894
1395263_at	AW529355	Calcium channel, voltage-dependent, beta 2 subunit	Cacnb2	1.2559	0.0561484	0.778518	0.0933048	1.14428	0.903138	0.783354	0.28324
1370178_at	BG373973	calcium channel, voltage-dependent, beta 2 subunit	Cacnb2	0.741558	0.122617	1.13849	0.158449	0.70143	0.00422142	1.09785	0.130691
1374717_at	BI295624	Calcium channel, voltage-dependent, beta 2 subunit	Cacnb2	0.950622	0.973463	0.826756	0.183053	0.9626	0.946612	0.949567	0.0939265
1387042_at	NM_012828	calcium channel, voltage-dependent, beta 3 subunit	Cacnb3	1.03106	0.192043	0.946513	0.393565	1.43419	0.204968	1.60458	0.00402159
1368759_at	NM_053351	calcium channel, voltage-dependent, gamma subunit 2	Cacng2	0.998748	0.995115	0.998765	0.150164	1.00144	0.331004	1.00139	0.763996
1378151_at	BE114019	Calcium channel, voltage-dependent, gamma subunit 8	Cacng8	1.28383	0.596738	0.949807	0.625303	0.711477	0.216394	1.19871	0.094923
1370452_at	M59786	calcium channel, voltage-dependent, L type, alpha 1C subunit	Cacna1c	0.884932	0.955092	0.732289	0.0794918	0.676492	0.115697	0.67334	0.0497985
1369086_a_at	NM_017298	calcium channel, voltage-dependent, L type, alpha 1D subunit	Cacna1d	0.843585	0.697067	0.950822	0.726549	1.14922	0.345241	0.748219	0.191481
1397008_at	BF404563	Calcium channel, voltage-dependent, P/Q type, alpha 1A subunit	Cacna1a	0.913647	0.151236	0.718106	0.347679	0.764356	0.203085	0.725453	0.519422
1368398_at	NM_031601	calcium channel, voltage-dependent, T type, alpha 1H subunit	Cacna1h	2.63972	0.177632	0.807258	0.630906	2.40843	0.068509	0.633824	0.0133458
1372705_at	BG376747	calcium homeostasis endoplasmic reticulum protein (predicted)	Cherp_predicted	0.7918	0.0977909	1.37087	0.329637	0.779353	0.0313559	0.942808	0.870238
1387086_at	NM_053334	calcium modulating ligand	Camlg	0.100207	0.0274666	0.1974	0.000222378	0.168292	0.00164453	0.185976	0.00407418
1388659_at	BI295783	calcium regulated heat stable protein 1	Carhsp1	2.10766	0.0131928	2.4793	0.00343201	2.41028	0.00615277	2.61727	0.00716063
1371536_at	AI233208	calcium regulated heat stable protein 1	Carhsp1	2.05373	0.124727	2.31258	0.0334879	1.37427	0.612965	1.8944	0.0237156
1367889_at	NM_134468	calcium/calmodulin-dependent protein kinase I	Camk1	0.450853	0.00719747	0.735725	0.0174625	0.42034	0.0103278	0.706353	0.232225
1391229_at	BG381458	calcium/calmodulin-dependent protein kinase I gamma	Camk1g	0.383185	0.00826369	0.36754	0.00337644	0.660293	0.129949	0.401045	0.00428658
1389876_at	BE111167	Calcium/calmodulin-dependent protein kinase II inhibitor 1	Camk2n1	0.961485	0.788814	0.639475	0.0395225	0.790371	0.130383	0.489071	0.0432209
1389824_at	BF404381	Calcium/calmodulin-dependent protein kinase II, alpha	Camk2a	1.03246	0.996274	1.08878	0.432698	1.00201	0.989329	1.08847	0.215768
1398251_a_at	NM_021739	calcium/calmodulin-dependent protein kinase II, beta	Camk2b	1.00286	0.96675	0.737589	0.294127	0.998426	0.833671	0.683955	0.236573
1368834_at	AA894330	calcium/calmodulin-dependent protein kinase II, delta	Camk2d	2.11057	0.00260548	2.45054	0.00049814	2.17899	0.00441459	2.0626	0.00278116
1391142_at	BF400657	Calcium/calmodulin-dependent protein kinase IV	Camk4	1.00048	0.621287	0.990441	0.928794	0.922279	0.43075	1.15019	0.331966
1368156_at	NM_031662	calcium/calmodulin-dependent protein kinase kinase 1, alpha	Camkk1	0.754005	0.0288673	0.852327	0.176586	0.953381	0.64573	1.01301	0.276392
1368955_at	NM_022184	calcium/calmodulin-dependent serine protein kinase (MAGUK family)	Cask	1.08745	0.673588	0.729499	0.237816	1.30635	0.295588	0.940564	0.692285
1369158_at	NM_016996	calcium-sensing receptor	Casr	0.983357	0.0294739	0.546769	0.0261698	0.616812	0.0432995	0.697082	0.024888
1392912_at	BG664561	calcyclin binding protein	Cacybp	0.905842	0.325701	2.21233	5.44876e-05	0.847312	0.203942	1.6405	0.0011937
1392979_at	AW918443	calcyclin binding protein	Cacybp	0.844623	0.900607	2.09776	0.0309762	0.75573	0.408258	1.28879	0.33966
1387772_at	NM_031969	calmodulin 1	Calm1	0.99088	0.349189	0.529247	1.32061e-05	1.07736	0.0617389	0.637104	6.27016e-05
1369936_at	X13933	calmodulin 1	Calm1	0.878338	0.752172	0.484072	0.00138776	0.945735	0.990309	0.675667	0.0114288
1369937_at	BI279113	calmodulin 1	Calm1	0.94362	0.824651	0.720018	0.135798	0.90087	0.168575	0.75471	0.282045
1370246_at	AA943837	calmodulin 2	Calm2	0.706526	0.578849	0.96473	0.360657	0.634126	0.173604	0.752075	0.0308063
1370873_at	AI411316	calmodulin 3	Calm3	0.769562	0.18135	0.322426	0.0140223	0.676485	0.127327	0.24954	0.0025511
1368101_at	NM_012518	calmodulin 3	Calm3	0.551145	0.313806	1.05635	0.880785	0.433709	0.00686157	0.871499	0.736714
1373317_at	BI278721	calmodulin 4 (predicted)	Calm4_predicted	1.06751	0.52645	0.999967	0.854289	1.00134	0.913063	1.00097	0.859431
1371687_at	BI297860	calnexin	Canx	0.773774	0.0739999	1.56472	0.70711	0.832998	0.2323	1.27922	0.460941
1371686_at	AA946205	calnexin	Canx	0.739624	0.190554	0.914075	0.100944	0.945456	0.506556	0.996847	0.932879
1388442_at	AA848326	calnexin	Canx	0.768232	0.97894	1.22158	0.921656	0.981699	0.498731	1.13358	0.578799
1387009_at	NM_019152	calpain 1	Capn1	0.460833	0.014838	0.314106	0.0683708	0.419614	0.0189378	0.693631	0.730964
1368904_at	NM_031673	calpain 10	Capn10	0.644017	0.103667	0.806743	0.878289	0.489654	0.0854899	0.741157	0.862518
1376287_at	BM389585	calpain 13	Capn13	1.70931	0.984308	1.29721	0.816805	1.18508	0.992286	0.892218	0.505176
1387860_at	BF281377	calpain 2	Capn2	1.5225	0.104792	1.3782	0.0180788	1.42898	0.100482	1.08502	0.479618
1373111_at	AI169441	calpain 7	Capn7	0.763155	0.0586712	1.35567	0.00734559	0.671929	0.0336346	1.28102	0.0304018
1392341_at	AW523444	Calpain, small subunit 1	Capns1	1.35608	0.286066	1.16018	0.251151	1.66988	0.15091	1.04573	0.236831
1367462_at	U10861	calpain, small subunit 1	Capns1	1.02632	0.962401	1.04653	0.885417	1.08647	0.408211	1.11264	0.575281
1373466_at	AA946474	calpastatin	Cast	0.483203	0.0169781	0.334104	0.00364676	0.46324	0.0085739	0.343727	0.0263515
1371173_a_at	Y13591	calpastatin	Cast	0.714271	0.240506	0.579236	0.337468	1.10882	0.994882	0.287886	0.00809944
1369754_a_at	NM_053295	calpastatin	Cast	0.879809	0.575833	0.742555	0.928035	0.928754	0.715824	0.664545	0.730886
1391481_at	BE104424	Calpastatin	Cast	0.893973	0.775569	1.1621	0.0770296	1.04589	0.150711	0.931909	0.0967731
1387856_at	BI274457	calponin 3, acidic	Cnn3	1.00791	0.259472	1.64327	0.000458106	1.66643	0.0401226	1.97559	0.00230442
1398750_at	NM_022399	calreticulin	Calr	0.87936	0.799965	0.880743	0.290291	1.1057	0.452587	0.824103	0.468916
1376732_at	BM388733	calreticulin 3	Calr3	1.13054	0.325834	0.789145	0.579605	1.12936	0.326027	0.995955	0.99174
1376225_at	BF411924	Calsenilin, presenilin binding protein, EF hand transcription factor	Csen	0.673262	0.145931	0.258893	0.00257517	0.560644	0.136997	0.328916	0.00923935
1388217_a_at	AJ001929	calumenin /// calumenin	Calu /// MGC124555	0.875415	0.461799	1.69049	0.0316432	0.81752	0.702548	1.41338	0.0644339
1368208_at	NM_133558	camello-like 1	Cml1	0.438971	0.00973476	0.197239	0.0257669	0.650005	0.142475	0.299703	0.0263858
1369708_a_at	NM_031017	cAMP responsive element binding protein 1	Creb1	1.45199	0.579406	1.29047	0.545943	1.15929	0.230051	1.43429	0.041195
1372990_at	AI179264	cAMP responsive element binding protein 3	Creb3	0.818841	0.580517	1.04979	0.418973	0.843252	0.496677	0.971672	0.248324
1374575_at	BI304123	cAMP responsive element binding protein 3-like 1	Creb3l1	3.48609	0.0348226	2.42762	0.00431796	1.73297	0.0186071	1.1622	0.0672103
1379565_at	AA956791	cAMP responsive element binding protein 3-like 2	Creb3l2	0.715693	0.115084	1.90729	0.0782846	0.58636	0.114161	1.54412	0.046534
1373429_at	BI295832	cAMP responsive element binding protein-like 1	Crebl1	0.795401	0.0299079	0.968129	0.229403	0.927361	0.134341	1.00018	0.99822
1373618_at	BE113210	cAMP responsive element binding protein-like 2	Crebl2	0.744077	0.677545	0.595393	0.0213958	0.688567	0.322253	0.747369	0.0169883
1393550_at	BF564195	CAMP responsive element modulator	Crem	0.234737	0.000191871	0.72764	0.187339	0.273297	0.0117158	0.829329	0.406702
1369737_at	NM_017334	cAMP responsive element modulator	Crem	0.445442	0.150365	0.74012	0.00951239	0.645714	0.00878121	0.684152	0.00574538
1369738_s_at	NM_017334	cAMP responsive element modulator	Crem	0.384237	0.427861	0.722691	0.0288153	0.49641	0.0622246	0.428389	0.0114378
1387714_at	AB031423	cAMP responsive element modulator	Crem	0.870687	0.945831	0.813467	0.353508	0.932121	0.407512	0.903009	0.710969
1393008_at	BI290317	CAMP-regulated phosphoprotein 19	Arpp19	0.841338	0.428648	1.15478	0.887759	0.403448	0.056901	0.693993	0.129845
1387077_at	NM_031660	cAMP-regulated phosphoprotein 19	Arpp19	1.14056	0.815973	3.04741	0.00328878	0.72615	0.0235661	2.46915	0.00198176
1376217_at	BM388768	cancer susceptibility candidate 1 (predicted)	Casc1_predicted	2.07144	0.151351	1.97536	0.0454254	3.03732	0.152875	1.91536	0.0533438
1397571_at	BF554256	Cancer susceptibility candidate 3	Casc3	1.66962	0.453563	0.918648	0.93629	0.90443	0.861648	0.860152	0.0602221
1368808_at	NM_022383	CAP, adenylate cyclase-associated protein 1 (yeast)	Cap1	1.78494	0.0391825	0.989897	0.364496	0.985206	0.71986	0.883401	0.197306
1368809_at	BG380723	CAP, adenylate cyclase-associated protein 1 (yeast)	Cap1	1.6366	0.0660208	1.18051	0.274044	1.42587	0.141353	1.37679	0.0610212
1382322_a_at	AI029769	capicua homolog (Drosophila) (predicted)	Cic_predicted	0.966885	0.824474	2.01736	0.0290988	1.22766	0.933056	1.60443	0.0330259
1399043_at	AI175266	capping protein (actin filament) muscle Z-line, alpha 2	Capza2	0.949722	0.426202	1.09223	0.130916	1.19901	0.362166	1.01627	0.0765679
1399091_at	AI232101	capping protein (actin filament) muscle Z-line, beta	Capzb	1.12328	0.557777	0.926923	0.443225	0.926875	0.842472	0.961105	0.359755
1374481_at	AA946502	cappuccino homolog (mouse)	Cno	0.769758	0.500672	1.15354	0.432518	0.912472	0.810952	1.12862	0.993359
1371797_at	BM391890	carbamyl phosphatate synthetase 2 (mapped)	Cad_mapped	0.665926	0.520075	1.66537	0.0177644	0.764038	0.823876	1.48247	0.0504262
1376697_at	BI275885	carbohydrate sulfotransferase 12	Chst12	0.868166	0.643183	0.670896	0.318748	0.925173	0.654312	0.609257	0.338193
1395684_at	AW534805	Carbonic anhydrase 14 (predicted)	Car14_predicted	0.954359	0.404012	0.54502	0.00131092	1.00625	0.984222	0.552907	0.00865382
1373790_at	AI045400	carbonic anhydrase 14 (predicted)	Car14_predicted	1.11281	0.559094	0.312792	0.000894398	1.0955	0.143512	0.282701	0.00220316
1386922_at	AI408948	carbonic anhydrase 2	Ca2	1.60828	0.0207568	1.02823	0.567569	1.74369	0.0418256	1.10472	0.786086
1367733_at	NM_019291	carbonic anhydrase 2	Ca2	3.63594	0.0460226	1.38667	0.107696	1.04754	0.838214	1.03171	0.849632
1398431_at	BI294910	carbonic anhydrase 8	Car8	1.1519	0.870863	1.8183	0.0247656	1.01598	0.101177	1.07159	0.55712
1390498_at	AI230554	Carbonic anhydrase VB, mitochondrial	Ca5b	0.991243	0.0380753	0.310488	0.0387623	0.65673	0.164327	0.305694	0.0381409
1377573_at	AI411132	carbonic anhydrase VB, mitochondrial	Ca5b	0.303337	0.0965199	0.540716	0.119186	0.519928	0.563225	0.575696	0.0689514
1390807_at	BG375352	carbonic anhydrase VB, mitochondrial	Ca5b	0.547953	0.910716	0.276531	0.0622869	0.853391	0.656493	0.191158	0.0426912
1375529_at	BF404908	carbonic reductase 4	Cbr4	0.834663	0.200002	0.505587	0.176282	0.747975	0.380248	0.72888	0.0846953
1368037_at	NM_019170	carbonyl reductase 1	Cbr1	0.433944	0.302806	0.743714	0.106069	0.219421	0.00444695	0.760011	0.395235
1397427_at	BI302102	Carboxylesterase 3	Ces3	1.01069	0.986801	1.07186	0.235974	1.13311	0.570311	1.21483	0.932016
1369657_at	NM_016998	carboxypeptidase A1	Cpa1	0.998576	0.954828	0.754564	0.4405	1.00005	0.632268	0.753798	0.440916
1393397_at	AI576488	carboxypeptidase A2 (pancreatic) (predicted)	Cpa2_predicted	0.353307	0.0236566	0.247702	0.00319813	0.466573	0.0734735	0.167998	0.0354607
1386921_at	NM_013128	carboxypeptidase E	Cpe	0.752158	0.0150006	0.847692	0.00732638	0.931856	0.16322	0.908034	0.0141956
1387503_at	NM_053526	carboxypeptidase N, polypeptide 1, 50kD	Cpn1	0.266322	0.000436452	0.405314	0.00760291	0.364448	0.00313586	0.496578	0.0324014
1374672_at	BI293060	cardiac ankyrin repeat kinase	Cark	1.75144	0.0582503	0.965061	0.263241	1.36264	0.128601	1.03707	0.325485
1374846_at	AI230884	cardiac lineage protein 1	Clp1	0.548949	0.00270037	0.815766	0.0886336	0.638686	0.0340525	1.05026	0.948089
1371886_at	AI411979	carnitine acetyltransferase	Crat	0.399252	0.00384049	0.813028	0.0633435	0.425192	0.0520633	1.30122	0.367208
1394038_at	BG371654	carnitine deficiency-associated gene expressed in ventricle 1	Cdv1	0.582543	0.0979365	0.614095	0.00768678	0.861391	0.0778261	0.650097	0.00384325
1395387_at	BI293317	carnitine deficiency-associated gene expressed in ventricle 1	Cdv1	0.584922	0.435768	0.938052	0.0553618	0.964253	0.435256	0.981589	0.932812
1368426_at	NM_031987	carnitine O-octanoyltransferase	Crot	4.31275	0.00174026	2.08063	0.0485074	7.45915	0.00143525	1.53417	0.024484
1386946_at	NM_031559	carnitine palmitoyltransferase 1a, liver	Cpt1a	2.0299	0.114091	0.802462	0.248673	1.68309	0.342042	0.650313	0.0778438
1367742_at	NM_013200	carnitine palmitoyltransferase 1b, muscle	Cpt1b	0.818088	0.723177	0.761849	0.159081	1.2959	0.161951	0.726591	0.0772482
1386927_at	NM_012930	carnitine palmitoyltransferase 2	Cpt2	0.294788	0.0419235	0.167212	0.00139105	0.307286	0.000203984	0.20927	0.022249
1390569_at	AI231438	carnosine dipeptidase 1 (metallopeptidase M20 family)	Cndp1	0.936387	0.550569	1.00516	0.927556	0.958016	0.557132	1.00148	0.940627
1377044_at	AW143175	Cartilage acidic protein 1	Crtac1	0.904507	0.59991	1.33217	0.195688	1.91408	0.0249876	1.00014	0.919837
1374646_at	BM387173	Casein kinase 1, alpha 1	Csnk1a1	0.825293	0.225627	0.748059	0.0247835	0.932943	0.383332	0.921868	0.166958
1369312_a_at	U77583	casein kinase 1, alpha 1	Csnk1a1	0.715063	0.363712	0.950164	0.777578	0.648364	0.31554	0.931067	0.938365
1394689_at	BE117217	Casein kinase 1, alpha 1	Csnk1a1	1.15167	0.673902	1.12477	0.963504	1.15378	0.638804	0.858395	0.197852
1389859_at	AI235291	Casein kinase 1, alpha 1	Csnk1a1	1.00614	0.953397	0.669807	0.131055	1.11881	0.473158	0.72269	0.210656
1370819_at	AB063114	casein kinase 1, delta	Csnk1d	1.29536	0.179096	3.34417	0.00380571	1.00339	0.747794	2.09807	0.0187814
1373332_at	AA946432	Casein kinase 1, delta	Csnk1d	0.898407	0.203682	0.694106	0.000608199	1.07559	0.551051	0.663345	0.0551554
1370527_a_at	L07578	casein kinase 1, delta	Csnk1d	1.1362	0.736674	7.92774	0.0313931	1.38633	0.0961301	3.66445	0.00200473
1387108_at	BF281311	casein kinase 2, beta subunit	Csnk2b	0.688761	0.884356	1.32283	0.141133	0.541316	0.144225	1.23794	0.203696
1375636_at	AI600042	Casein kinase II, alpha 1 polypeptide	Csnk2a1	0.56749	0.0193604	0.936437	0.2756	0.61983	0.000734714	0.933376	0.0709049
1376616_at	BF551036	Casein kinase II, alpha 1 polypeptide	Csnk2a1	0.365461	0.0414408	0.465068	0.000960021	0.408053	0.0377325	0.576009	0.0145579
1384339_s_at	BF288177	casein kinase II, alpha 1 polypeptide	Csnk2a1	0.95628	0.578074	0.389328	0.171338	0.948296	0.680864	0.769204	0.0954369
1382160_at	AI236331	Casein kinase II, alpha 2, polypeptide (predicted)	Csnk2a2_predicted	1.77271	0.0205413	3.05145	0.00379786	1.81484	0.0232948	2.53704	0.0147269
1371326_at	BI276957	casein kinase II, alpha 2, polypeptide (predicted)	Csnk2a2_predicted	1.31008	0.101017	1.57462	0.000630565	1.69937	0.00469023	1.69578	0.0238465
1378282_at	BI290750	casein kinase II, alpha 2, polypeptide (predicted)	Csnk2a2_predicted	0.956465	0.899976	1.76183	0.0201087	0.805231	0.889749	2.46995	0.0126034
1377192_a_at	BM384629	caseinolytic peptidase X (E.coli)	Clpx	1.36981	0.199345	2.43458	1.86375e-05	1.01034	0.905015	1.66901	0.0440151
1398698_at	BG371721	Caseinolytic peptidase X (E.coli)	Clpx	2.00088	0.440131	1.91728	0.121187	1.33903	0.522994	1.9467	0.999952
1371027_at	BF556820	Casitas B-lineage lymphoma b	Cblb	1.00032	0.114611	1.42264	0.105651	1.06904	0.699019	1.10731	0.297057
1392847_at	BE118227	Casitas B-lineage lymphoma-like 1 (predicted)	Cbll1_predicted	0.843641	0.156383	2.2513	0.00377177	1.21148	0.393552	1.71048	0.0114944
1372434_at	BE098114	CASK-interacting protein CIP98	Cip98	1.79718	0.00374011	4.24225	0.00110823	1.1167	0.681841	2.90277	0.00111493
1368545_at	NM_057138	CASP8 and FADD-like apoptosis regulator	Cflar	7.50331	0.000657208	4.48403	0.000433766	1.72351	0.581167	2.69683	0.00211919
1392386_at	AI578435	CASP8 and FADD-like apoptosis regulator	Cflar	2.26911	0.00667429	1.14626	0.796871	1.62448	0.045865	1.40934	0.0963644
1391811_at	AI556437	CASP8 and FADD-like apoptosis regulator	Cflar	1.39284	0.285406	0.822171	0.395407	1.73423	0.0938585	0.445048	0.474314
1379919_at	AI575276	CASP8 and FADD-like apoptosis regulator	Cflar	0.92924	0.332165	0.652498	0.135961	1.01484	0.726945	0.931402	0.472774
1387605_at	NM_130422	caspase 12	Casp12	1.50078	0.109773	1.02795	0.425859	3.64118	0.024726	1.09244	0.114802
1367890_at	NM_022522	caspase 2	Casp2	1.28078	0.427895	0.956504	0.414584	0.879406	0.662851	0.87795	0.00485604
1390386_at	BM387008	caspase 3, apoptosis related cysteine protease	Casp3	2.50844	0.0716419	0.688265	0.0901909	3.12739	0.0725791	1.73525	0.311265
1381173_at	BG375010	Caspase 4, apoptosis-related cysteine peptidase	Casp4	17.9719	0.00430451	5.70397	0.00114897	15.8906	0.00449703	17.306	0.00855366
1387818_at	NM_053736	caspase 4, apoptosis-related cysteine peptidase	Casp4	18.8909	0.00671697	41.2395	0.00527777	26.1322	0.00479459	65.6067	0.000920251
1389170_at	BF283754	caspase 7	Casp7	0.395958	0.454489	0.571277	0.00682621	0.306473	0.170142	0.720575	0.0607254
1369557_at	NM_022260	caspase 7	Casp7	0.922088	0.781114	0.63987	0.151604	1.00548	0.745386	0.638769	0.14842
1369262_at	NM_022277	caspase 8	Casp8	1.08394	0.826922	1.00209	0.978411	1.09019	0.0783548	1.01352	0.88024
1373194_at	BF282281	caspase 8 associated protein 2 (predicted)	Casp8ap2_predicted	0.437842	0.0566113	0.35177	0.0307966	0.535406	0.0110789	0.722562	0.113105
1382586_at	AW919926	Caspase 8 associated protein 2 (predicted)	Casp8ap2_predicted	1.02439	0.558221	0.717951	0.100818	1.10148	0.558872	1.02848	0.750538
1373440_at	AI175525	caspase 8 associated protein 2 (predicted)	Casp8ap2_predicted	0.517639	0.617762	1.073	0.609459	0.712668	0.540902	1.58007	0.0500009
1370962_at	AI136555	castration induced prostatic apoptosis-related protein 1	Cipar1	0.998448	0.874889	0.946884	0.197607	1.00097	0.987911	0.975082	0.291035
1367995_at	NM_012520	catalase	Cat	0.792917	0.526247	1.95724	0.00147748	0.721518	0.49313	2.1161	0.00435738
1376228_at	BF419434	Catalytic/ protein phosphatase type 2C	---	1.00451	0.900871	1.00194	0.960865	5.31272	0.0771462	1.05462	0.759378
1368826_at	NM_012531	catechol-O-methyltransferase	Comt	1.1827	0.215203	2.79903	0.00308395	1.92086	0.0391077	2.91364	0.000743098
1373150_at	AW251225	catechol-O-methyltransferase domain containing 1 (predicted)	Comtd1_predicted	1.00144	0.989539	1.29236	0.141092	0.998595	0.995919	2.00382	0.0349538
1398354_at	AI555457	catenin (cadherin associated protein), alpha-like 1 (predicted)	Ctnnal1_predicted	0.450621	0.00710913	0.416221	0.00617169	0.285807	0.0215375	0.369358	0.00540723
1369733_at	NM_053357	catenin (cadherin associated protein), beta 1	Ctnnb1	2.44746	0.33513	1.56664	0.0347376	0.926841	0.977387	0.859812	0.52048
1373067_at	AI102738	Catenin (cadherin associated protein), beta 1	Ctnnb1	1.149	0.425859	0.952126	0.553803	0.951847	0.563337	0.903406	0.437109
1388415_at	BE109560	catenin (cadherin associated protein), delta 1 (predicted)	Ctnnd1_predicted	1.52173	0.0147964	0.902481	0.9257	1.489	0.0480812	1.06897	0.277028
1371921_at	BM986272	catenin (cadherin-associated protein), alpha 1	Catna1	1.39056	0.000682171	1.66562	0.000331997	1.29102	0.0540454	1.48773	0.0177115
1390723_at	BF386742	Catenin (cadherin-associated protein), alpha 1	Catna1	1.63107	0.0393392	0.977363	0.370752	1.77296	0.0251241	1.10031	0.593404
1367646_at	NM_022597	cathepsin B	Ctsb	1.04787	0.606184	1.0488	0.140755	0.927044	0.646077	0.939659	0.150687
1367651_at	NM_134334	cathepsin D	Ctsd	0.737795	0.756948	0.835364	0.23739	0.797905	0.373049	0.949864	0.348873
1373258_at	AI169359	cathepsin F	Ctsf	0.563341	0.304414	0.440973	0.0245983	0.535235	0.000506225	0.36796	0.0251028
1370244_at	AI176595	cathepsin L	Ctsl	0.636925	0.48822	1.27412	0.0508375	0.497362	0.129646	1.15993	0.219239
1370245_at	AI232474	cathepsin L	Ctsl	0.782271	0.943907	2.80666	0.00337248	0.426951	0.149539	2.62406	0.00723644
1370885_at	AA849399	cathepsin Z	Ctsz	1.03283	0.815042	0.857036	0.0471206	0.975597	0.868512	0.805193	0.790343
1394735_at	BF409552	cation channel, sperm associated 2	Catsper2	0.996258	0.835123	0.949762	0.0949018	1.80346	0.0746021	0.907482	0.557294
1387726_at	NM_023963	caudal type homeo box 2	Cdx2	0.965181	0.843136	0.995653	0.796876	0.951256	0.402351	1.0723	0.349976
1385519_at	BE105678	CBFA2T1 identified gene homolog (human) (predicted)	Cbfa2t1_predicted	1.19865	0.293846	0.810026	0.404016	0.384728	0.0615153	1.30198	0.69666
1395076_at	BE117804	CBFA2T1 identified gene homolog (human) (predicted)	Cbfa2t1_predicted	1.43797	0.761815	0.619905	0.174512	0.906584	0.946924	0.760926	0.366755
1385215_at	BF388857	CBFA2T1 identified gene homolog (human) (predicted)	Cbfa2t1_predicted	0.855953	0.862284	0.792096	0.569999	0.978457	0.872068	1.04028	0.726702
1367602_at	AI013390	Cbp/p300-interacting transactivator, with Glu/Asp-rich carboxy-terminal domain, 2	Cited2	0.0741871	0.113561	0.694944	0.390665	0.463683	0.236604	0.83487	0.577723
1367601_at	NM_053698	Cbp/p300-interacting transactivator, with Glu/Asp-rich carboxy-terminal domain, 2	Cited2	0.234873	0.233824	2.66723	0.0792129	1.28639	0.951927	1.20062	0.330832
1384126_a_at	AW917217	CCAAT/enhancer binding protein (C/EBP), alpha	Cebpa	1.43954	0.141184	0.652791	0.122398	0.894622	0.58552	1.03554	0.89834
1398959_at	AA850070	CCAAT/enhancer binding protein (C/EBP), delta	Cebpd	0.721914	0.0100587	0.941592	0.579975	0.73384	0.144501	0.818552	0.0228741
1387343_at	NM_013154	CCAAT/enhancer binding protein (C/EBP), delta	Cebpd	2.34192	0.017148	10.822	0.00598107	1.11249	0.0448766	5.41906	0.0049917
1374842_at	BF287009	CCAAT/enhancer binding protein zeta (predicted)	Cebpz_predicted	0.742459	0.00179206	1.44209	0.0275401	0.722839	0.0272826	1.36887	0.0264266
1370337_at	AF133731	CCCTC-binding factor	Ctcf	0.985989	0.944595	1.4831	0.0492938	0.866877	0.15542	1.24191	0.152319
1372988_at	BF397012	CCR4-NOT transcription complex, subunit 10	Cnot10	0.614812	0.0507723	0.972129	0.391282	0.721592	0.0841418	1.14665	0.0660531
1376067_at	AA800637	CCR4-NOT transcription complex, subunit 2	Cnot2	0.896106	0.0870109	0.50958	0.0160167	0.878734	0.0917146	0.553536	0.0138136
1373190_at	AI101401	CCR4-NOT transcription complex, subunit 4	Cnot4	1.31446	0.30194	1.40115	0.661366	1.46845	0.151423	1.06014	0.697454
1393619_at	AI045762	CCR4-NOT transcription complex, subunit 6-like (predicted)	Cnot6l_predicted	1.0758	0.409086	0.672144	0.0250084	1.43599	0.0223313	1.1074	0.51171
1367515_at	BE111850	CCR4-NOT transcription complex, subunit 7 (predicted)	Cnot7_predicted	2.44963	0.00273699	1.47772	0.0270474	2.03989	0.0362291	1.5959	0.00373229
1379624_at	AA964442	CCR4-NOT transcription complex, subunit 8	Cnot8	0.989107	0.232383	0.998852	0.995015	0.992601	0.968496	1.00576	0.869115
1372253_at	AI408162	CCR4-NOT transcription complex, subunit 8	Cnot8	1.00416	0.98609	0.711653	0.0489193	1.00513	0.977648	0.921123	0.86843
1398827_at	NM_013087	CD 81 antigen	Cd81	1.02265	0.965558	0.969413	0.322706	1.02673	0.346126	1.10972	0.17591
1368490_at	NM_021744	CD14 antigen	Cd14	0.871533	0.924568	1.00148	0.482943	1.00061	0.992911	1.30233	0.39021
1367681_at	NM_022523	CD151 antigen	Cd151	0.745307	0.100538	0.703356	0.0485862	0.619716	0.0891262	0.422096	0.0268931
1379716_at	AA956555	CD163 antigen (predicted)	Cd163_predicted	1.16603	0.806392	0.867243	0.64007	1.06568	0.620398	0.858201	0.27393
1386886_at	NM_031812	CD164 antigen	Cd164	0.720169	0.063891	0.741768	0.00623781	0.758546	0.00288206	0.795701	0.0243503
1393863_at	AA999005	CD180 antigen (predicted)	Cd180_predicted	1.76253	0.271965	1.35522	0.371932	1.02235	0.370823	1.04396	0.08612
1368593_at	NM_017079	CD1d1 antigen	Cd1d1	0.496882	0.88915	1.50487	0.310633	0.699778	0.548273	1.57407	0.012469
1372036_at	BG378032	CD2 antigen (cytoplasmic tail) binding protein 2 (predicted)	Cd2bp2_predicted	1.04669	0.122751	0.764693	0.0317531	1.25293	0.0808796	0.791004	0.0848253
1385676_at	BG379822	CD2 antigen (cytoplasmic tail) binding protein 2 (predicted)	Cd2bp2_predicted	0.663896	0.329611	1.39437	0.0147475	1.01667	0.705785	1.00554	0.165365
1395530_at	AI555739	CD2 antigen (cytoplasmic tail) binding protein 2 (predicted)	Cd2bp2_predicted	1.13498	0.412771	0.827136	0.165826	1.01956	0.898367	0.740933	0.0126106
1380908_at	AA924563	Cd200 antigen	Cd200	1.57039	0.126269	0.725627	0.766327	1.30631	0.444614	0.998123	0.984133
1369670_at	NM_031518	Cd200 antigen	Cd200	1.00126	0.989414	1.04219	0.563568	0.688946	0.0309447	0.80562	0.0312922
1369953_a_at	BI285141	CD24 antigen	Cd24	0.255169	0.062341	0.334238	0.041409	0.237067	0.03231	0.245227	0.0110361
1383962_at	BI275530	Cd27 binding protein (Hindu God of destruction) (predicted)	Siva_predicted	0.442993	0.101436	0.935211	0.477285	0.332778	0.0139183	0.941577	0.678753
1374198_at	BF398424	CD276 antigen	Cd276	1.78197	0.133861	1.22027	0.0941987	1.32709	0.110869	1.09148	0.426925
1372071_at	AI102320	CD320 antigen	Cd320	0.640067	0.29726	0.833241	0.0742448	0.679829	0.00479793	0.568586	0.0110961
1368975_at	NM_013127	CD38 antigen	Cd38	1.4638	0.176311	1.71397	0.765099	1.69689	0.281596	2.33909	0.277611
1390325_at	BI289418	CD38 antigen	Cd38	1.19862	0.853113	0.901342	0.514163	1.19145	0.296649	0.992224	0.740439
1387952_a_at	AF065147	CD44 antigen	Cd44	9.39442	0.00129184	8.05891	0.00438359	4.65361	0.0644171	4.77431	0.0135281
1368921_a_at	NM_012924	CD44 antigen	Cd44	13.4542	0.00872163	11.3454	0.000576854	9.24601	0.0157845	8.39389	0.00159988
1369559_a_at	NM_019195	CD47 antigen (Rh-related antigen, integrin-associated signal transducer)	Cd47	3.42988	0.0926175	3.61364	0.00335968	3.31447	0.00753166	4.11098	0.0039242
1367929_at	NM_012925	CD59 antigen	Cd59	0.689976	0.00164982	0.222797	5.18268e-05	0.807136	0.00438472	0.345261	0.000896181
1367709_at	NM_017125	CD63 antigen	Cd63	0.926398	0.89714	1.17855	0.0104216	0.841235	0.00423753	1.13788	0.0308474
1384837_at	AI137672	CD69 antigen	Cd69	191.709	4.16731e-06	120.693	6.16638e-06	92.2142	0.0014918	87.1576	8.73311e-05
1367679_at	NM_013069	CD74 antigen (invariant polypeptide of major histocompatibility complex, class II antigen-associated)	Cd74	13.2112	0.0195536	17.9989	0.000863644	49.9171	0.000976882	73.8955	0.000446477
1386976_at	NM_031797	CD82 antigen	Cd82	3.40376	0.000508486	10.5164	3.67315e-05	5.88586	0.00114792	11.8918	2.67759e-05
1390529_at	AI412355	CD83 antigen (predicted)	Cd83_predicted	4.69166	0.000244174	1.56066	0.190326	12.9745	0.00371284	2.058	0.00924764
1381206_at	BE121026	CD96 antigen	Cd96	1.03042	0.0723915	1.76559	0.0198579	1.12855	0.0208043	2.44505	0.00570053
1382527_at	AI764706	CD96 antigen	Cd96	0.431157	0.224384	1.15348	0.107934	0.909234	0.453394	0.99471	0.661121
1399141_at	BF404428	CDC like kinase 4	Clk4	1.08738	0.579237	1.22403	0.0563843	1.16301	0.843815	0.991717	0.438065
1376544_at	BF414624	CDC14 cell division cycle 14 homolog A (S. cerevisiae) (predicted)	Cdc14a_predicted	2.08986	0.209625	1.29824	0.374225	0.895535	0.232325	1.18301	0.899221
1399074_at	BI279569	CDC16 cell division cycle 16 homolog (S. cerevisiae)	Cdc16	0.666571	0.202474	0.86211	0.0651236	0.603993	0.0796644	0.752988	0.0337397
1389646_at	BE100584	CDC23 (cell division cycle 23, yeast, homolog)	Cdc23	0.593204	0.0779064	0.571623	0.00272179	0.543506	0.120206	0.690594	0.216441
1373246_at	BF397920	CDC23 (cell division cycle 23, yeast, homolog)	Cdc23	0.929303	0.632991	0.585792	0.00400273	0.89113	0.382671	0.621346	0.0095193
1396320_at	BF396773	Cdc2-related kinase, arginine/serine-rich	Crkrs	1.11785	0.303551	0.937838	0.452676	1.04919	0.647025	1.15906	0.787541
1387546_at	NM_138916	Cdc2-related kinase, arginine/serine-rich	Crkrs	1.28763	0.387415	1.44784	0.0645151	1.39467	0.369342	1.01618	0.867826
1394887_x_at	AI407383	Cdc2-related kinase, arginine/serine-rich	Crkrs	1.29678	0.817144	0.784093	0.231771	0.93168	0.333524	0.90682	0.23322
1375910_at	AA874943	CDC42 effector protein (Rho GTPase binding) 3 (predicted)	Cdc42ep3_predicted	1.24846	0.0847545	1.35899	0.058018	1.10956	0.0304404	1.18431	0.229586
1388730_at	AI407903	CDC42 effector protein (Rho GTPase binding) 4 (predicted)	Cdc42ep4_predicted	1.13649	0.764245	1.60544	0.0648183	0.890983	0.694098	1.16105	0.534335
1397853_s_at	BG672534	Cdc42 guanine nucleotide exchange factor (GEF) 9	Arhgef9	2.62059	0.0211688	0.999354	0.99728	1.17175	0.603987	0.971873	0.998141
1388468_at	BI284508	CDC42 small effector 1	Cdc42se1	0.556595	0.0724168	1.2828	0.0412724	0.617524	0.0553118	1.02051	0.433165
1388530_at	BM389459	CDC42 small effector 1	Cdc42se1	1.50373	0.369404	5.41536	0.0153744	1.31311	0.547327	3.35041	0.0119763
1374357_at	AI713763	CDC91 cell division cycle 91-like 1 (S. cerevisiae)	Cdc91l1	1.25856	0.134812	0.909264	0.438222	1.01196	0.987454	0.889612	0.366149
1399022_at	AI177513	CDC-like kinase 1	Clk1	1.33077	0.0243623	0.941135	0.500159	1.81167	0.00628874	0.978935	0.55804
1368235_at	NM_134340	CDC-like kinase 3	Clk3	0.702096	0.0108533	1.51568	0.016279	1.01908	0.553333	1.59382	0.0583458
1398801_at	NM_134415	CDK105 protein	Cdk105	0.853637	0.579044	1.26748	0.288672	0.863729	0.305193	1.08877	0.607288
1388443_at	AI177871	CDK2 (cyclin-dependent kinase 2)-associated protein 1 (predicted)	Cdk2ap1_predicted	0.54226	0.250962	0.653842	0.00423121	0.324226	0.00201868	0.610159	0.0178522
1367879_at	NM_024488	CDK5 regulatory subunit associated protein 3	Cdk5rap3	0.961399	0.803819	1.11334	0.0608361	1.02513	0.742487	0.999082	0.964598
1390214_a_at	BI284812	CDKN1A interacting zinc finger protein 1 (predicted)	Ciz1_predicted	1.14728	0.114534	2.57028	0.0284792	0.862605	0.364968	1.71064	0.0378389
1392991_at	AA859535	CDNA clone IMAGE:7130415	---	0.739814	0.0292452	1.14397	0.811573	0.696504	0.0381825	0.985046	0.439845
1385965_at	AI045533	CDNA clone IMAGE:7131734	---	0.810001	0.257939	1.05423	0.0533544	0.716419	0.0225929	1.06165	0.335562
1394041_at	BI293870	CDNA clone IMAGE:7131734	---	0.775516	0.277489	1.17374	0.00883949	0.793178	0.140804	1.04649	0.0902349
1389287_at	BI279573	CDNA clone IMAGE:7193711	---	2.47889	0.00310418	2.02199	0.0114135	2.02079	0.00383395	1.84683	0.00246586
1373808_at	BF417211	CDNA clone IMAGE:7193711	---	1.7373	0.468685	2.39524	0.00030925	1.26978	0.728335	2.4344	0.00920964
1390227_at	AI101017	CDNA clone IMAGE:7300848	---	0.990557	0.651203	0.744075	0.490612	0.959524	0.802181	0.951976	0.803081
1390912_at	BE101168	CDNA clone IMAGE:7300848	---	0.998858	0.733024	0.659797	0.037293	1.00181	0.993525	0.658987	0.0393
1396091_at	BI296193	CDNA clone IMAGE:7301487	---	0.623995	0.132159	1.74831	0.011712	0.473463	0.301993	1.52145	0.0337479
1375895_at	BI275908	CDNA clone IMAGE:7302535, with apparent retained intron	---	0.909607	0.139074	1.93812	0.000391636	1.03921	0.459238	1.83291	0.000116469
1393109_at	BI274436	CDNA clone IMAGE:7302574	---	0.223349	0.100955	0.093172	0.00021216	0.184391	0.0106541	0.129584	0.00618518
1384453_at	AI045824	CDNA clone IMAGE:7303447	---	1.16954	0.187639	1.00022	0.802394	0.873075	0.28503	0.793647	0.70372
1371448_at	AI599295	CDNA clone IMAGE:7303896	---	0.614525	0.158861	0.598151	0.0364956	0.620559	0.029085	0.971592	0.353594
1383349_at	BE115594	CDNA clone IMAGE:7304849	---	2.71895	0.00270484	1.11287	0.234347	5.91307	7.72666e-05	1.81578	0.00571307
1389545_at	BF281994	CDNA clone IMAGE:7307013	---	1.68644	0.101036	1.66204	0.00240305	1.18084	0.3092	1.80984	0.0052443
1389601_at	BI293610	CDNA clone IMAGE:7308494	---	1.25959	0.774453	1.45113	0.726033	1.62759	0.145144	1.22047	0.161168
1390449_at	BI289132	CDNA clone IMAGE:7309127	---	1.08471	0.0280751	1.23334	0.310861	2.61378	0.0126721	2.21422	0.0264577
1377922_at	BE111094	CDNA clone IMAGE:7312313	---	1.25879	0.219936	0.808114	0.0211203	1.12981	0.40431	0.944714	0.844378
1389331_at	AI104371	CDNA clone IMAGE:7313169	---	1.12831	0.208199	1.42685	0.00828641	1.55204	0.0128739	1.67289	0.00230513
1391639_at	AI170084	CDNA clone IMAGE:7313169	---	0.844425	0.58475	0.924103	0.809698	1.88345	0.192655	1.3911	0.20049
1376892_at	AI102061	CDNA clone IMAGE:7313785	---	0.62374	0.153944	0.147955	0.00452392	0.771229	0.3889	0.200336	0.00155255
1374161_at	AI104686	CDNA clone IMAGE:7316678	---	0.450268	0.0519895	0.683163	0.0151078	0.619967	0.0814443	0.742092	0.00920702
1383705_at	BG670702	CDNA clone IMAGE:7317308	---	0.560915	0.690075	1.88567	0.27039	0.595861	0.189913	1.12063	0.618464
1399062_at	BI301008	CDNA clone IMAGE:7317308	---	0.961933	0.932997	1.47963	0.182041	0.636383	0.573345	1.33582	0.117463
1388700_at	AW253004	CDNA clone IMAGE:7317367	---	1.23903	0.00721683	1.07425	0.811793	0.952518	0.315778	0.963816	0.485777
1376764_at	AI406412	CDNA clone IMAGE:7319904	---	0.671988	0.2242	0.152633	3.17412e-05	0.719491	0.0153573	0.119512	0.016272
1383127_at	BI295823	CDNA clone IMAGE:7320912	---	0.744122	0.0491539	0.436354	0.0027146	0.695189	0.00615769	0.65599	0.029229
1372760_at	AI176579	CDNA clone IMAGE:7321089	---	1.01981	0.815394	1.42797	0.0480405	0.961131	0.743867	1.19901	0.083466
1389986_at	AI008409	CDNA clone IMAGE:7321089	---	1.17837	0.875362	1.13086	0.12451	1.15632	0.146465	1.06713	0.102981
1392904_at	BF544602	CDNA clone IMAGE:7321811	---	1.16244	0.466987	1.18123	0.148937	1.06045	0.762628	1.17065	0.17573
1379341_at	BG378132	CDNA clone IMAGE:7322363	---	1.2202	0.297831	2.83339	0.0244103	1.27211	0.11614	2.33958	0.00126087
1383400_at	BI293535	CDNA clone IMAGE:7324288	---	1.15211	0.0878032	1.03704	0.170327	0.709241	0.0523042	0.992998	0.407753
1374509_at	BI275722	CDNA clone IMAGE:7324860	---	0.569794	0.0168885	0.492949	0.001838	0.499158	0.0613852	0.568738	0.00517236
1388710_at	BI281986	CDNA clone IMAGE:7365357	---	1.03641	0.959808	1.48115	0.000985974	0.642569	0.0225096	1.15928	0.492785
1373943_at	AI237047	CDNA clone IMAGE:7365681	---	0.788543	0.035761	0.582582	0.000770228	0.747749	0.03484	0.690006	0.000171621
1372308_at	BM386869	CDNA clone IMAGE:7366335	---	0.812228	0.385706	0.747192	0.244238	0.363884	0.0325372	0.610007	0.018373
1373520_at	BI285960	CDNA clone IMAGE:7367270	---	1.6326	0.0469787	1.40962	0.0385393	1.19997	0.0852103	0.780643	0.528414
1399028_at	AI171954	CDNA clone IMAGE:7367808	---	1.32965	0.0942148	1.11634	0.223666	1.28901	0.00364145	1.12342	0.077249
1395584_at	C06826	CDNA clone IMAGE:7367808	---	1.39773	0.15384	1.02425	0.889045	1.30558	0.127305	1.01211	0.681652
1390621_at	BG376889	CDNA clone IMAGE:7367808	---	1.29437	0.392441	0.776575	0.506135	0.756377	0.274014	0.773758	0.149829
1373405_at	AI410762	CDNA clone IMAGE:7373898	---	2.14768	0.129845	1.08837	0.27562	2.58613	0.0773845	1.46774	0.035428
1379597_at	AI011037	CDNA clone IMAGE:7375470	---	0.357976	0.00390507	0.833387	0.361118	0.849063	0.0707768	0.624249	0.75927
1372624_at	BF551377	CDNA clone IMAGE:7375734	---	1.35957	0.0171458	0.597491	0.00875116	1.15152	0.0417241	0.830471	0.136616
1385667_x_at	AI029796	CDNA clone IMAGE:7379585	---	0.726437	0.000147953	0.476221	0.00392094	0.737251	0.038297	0.528061	0.00924178
1383194_a_at	AI030349	CDNA clone IMAGE:7379585	---	0.558256	0.0175681	0.489518	0.000888169	0.57986	0.00199992	0.538574	0.0587751
1385540_at	AI044916	CDNA clone IMAGE:7379764	---	1.60389	0.0459572	0.462678	0.00548614	1.20418	0.302868	0.483922	0.0196958
1386258_at	AA945099	CDNA clone IMAGE:7386859	---	0.683092	0.0673122	0.970337	0.297942	0.946818	0.81734	1.14103	0.758291
1383629_a_at	BI289966	CDNA clone IMAGE:7386859	---	0.734519	0.0750203	0.977335	0.0367144	0.766603	0.424337	1.09914	0.747297
1374368_at	BI291066	CDNA clone IMAGE:7389555	---	0.885589	0.118632	1.43764	0.0210042	0.711355	0.09689	1.47133	0.004655
1393704_at	AI136988	CDNA clone IMAGE:7442534	---	1.12299	0.338622	1.37888	0.0425339	1.01834	0.972984	1.63719	0.189677
1376014_at	AI045725	CDNA clone IMAGE:7453109	---	1.0089	0.989808	0.908232	0.250041	1.02226	0.920745	0.680261	0.186862
1389142_at	AI013361	CDNA clone IMAGE:7455024	---	0.679915	0.588366	0.424927	0.00190025	0.61216	0.17317	0.442042	0.00274525
1378446_at	BI283723	CDNA clone IMAGE:7457557	---	0.928498	0.837468	0.653487	0.0904684	1.05076	0.963723	0.885615	0.0738091
1379558_at	AA957033	CDNA clone IMAGE:7930522	---	1.28617	0.118794	0.346268	0.00141271	6.1885	0.000410188	1.14993	0.922144
1371721_at	BI281103	CDNA clone IMAGE:7932112	---	0.839124	0.280114	1.32358	0.26012	1.44819	0.291857	1.64766	0.0643686
1374635_at	AW527151	CDNA clone IMAGE:7932607	---	1.28463	0.785047	0.639697	0.24166	1.00162	0.988882	1.00153	0.998122
1383896_at	BM387943	CDNA clone MGC:105591 IMAGE:7313723	---	0.685109	0.0782339	1.70194	0.00436963	0.998783	0.463497	1.5791	0.103748
1371460_at	AA859261	CDNA clone MGC:105597 IMAGE:7314502	---	0.681648	0.582366	0.895181	0.773566	0.509792	0.0518944	1.08259	0.733851
1394388_at	AA858844	CDNA clone MGC:105701 IMAGE:7309421	---	0.6349	0.191361	1.01633	0.63716	0.649679	0.0185727	1.08345	0.168872
1383912_at	BM390524	CDNA clone MGC:109201 IMAGE:7306744	---	1.8227	0.0351861	2.29362	0.00642217	2.05786	0.00734423	2.49329	0.000628165
1371401_at	BI278836	CDNA clone MGC:109637 IMAGE:7367801	---	0.592494	0.984447	0.669954	0.0907035	0.659841	0.904435	0.766105	0.10735
1399007_at	BF557930	CDNA clone MGC:109642 IMAGE:7368024	---	0.644913	0.361582	0.744845	0.623577	0.692976	0.0207664	0.900366	0.310562
1371434_at	AI172362	CDNA clone MGC:112638 IMAGE:7376647	---	1.4025	0.103669	1.83815	0.00331993	1.39896	0.00740641	2.15883	0.000380934
1388572_at	BM389961	CDNA clone MGC:112923 IMAGE:7380411	---	0.72614	0.00849212	0.701418	0.408357	0.768555	0.289524	1.12792	0.256686
1391997_at	AW523656	CDNA clone MGC:112923 IMAGE:7380411	---	1.00432	0.952066	1.0007	0.189416	0.991104	0.989488	0.938577	0.0665765
1398006_at	AI454795	CDNA clone MGC:116179 IMAGE:7455942	---	0.998668	0.993056	1.02034	0.1743	1.51902	0.209401	1.00292	0.940803
1375296_at	AI407178	CDNA clone MGC:125029 IMAGE:7458016	---	0.693869	0.00429303	1.43337	0.00516883	0.78573	0.00436158	1.25586	0.0252762
1371956_at	BG372686	CDNA clone MGC:93760 IMAGE:7108525	---	0.508964	0.152441	0.427114	0.000674664	0.462718	0.0107606	0.488807	0.00184118
1398360_at	AI009805	CDNA clone MGC:93791 IMAGE:7109632	---	0.907571	0.884895	1.49122	0.0389192	0.702113	0.0144568	1.3787	0.00464507
1371856_at	AI408941	CDNA clone MGC:93828 IMAGE:7110880	---	1.09545	0.127763	1.0836	0.747306	1.36143	0.00819028	1.03261	0.334153
1397313_at	AI716841	CDNA clone MGC:93828 IMAGE:7110880	---	1.01853	0.996529	0.879121	0.589135	1.06399	0.991705	0.396512	0.0906621
1389387_at	BF561377	CDNA clone MGC:93913 IMAGE:7112877	---	2.31409	0.115788	2.18943	0.0255329	3.2053	0.00243067	3.65283	0.00655852
1367490_at	AI102046	CDNA clone MGC:94668 IMAGE:7192222	---	0.59396	0.022056	0.601497	0.0360796	0.496221	0.0246813	0.801261	0.318288
1372340_at	BM386355	CDNA clone MGC:94725 IMAGE:7193416	---	0.778092	0.65623	1.12801	0.2522	0.809543	0.492188	1.06345	0.102592
1398942_at	BI278885	CDNA clone MGC:95041 IMAGE:7123253	---	0.554279	0.0780794	0.556383	3.15717e-05	0.696732	0.0073178	0.789301	0.00789879
1384256_at	BI293599	CDNA clone MGC:95252 IMAGE:7133376	---	0.663555	0.0503204	0.938269	0.990982	0.592037	0.00721417	0.940727	0.905776
1368248_at	NM_031242	CDP-diacylglycerol synthase 1	Cds1	0.847818	0.745413	1.86213	0.00153071	1.73298	0.0309188	2.0191	0.00115779
1387900_at	D82928	CDP-diacylglycerol--inositol 3-phosphatidyltransferase (phosphatidylinositol synthase)	Cdipt	0.804746	0.335355	0.940229	0.173839	0.80989	0.0394146	0.930382	0.32698
1368480_at	NM_053492	CDW92 antigen	Cdw92	2.75289	0.000664074	1.1508	0.250169	2.39949	0.0020959	1.26051	0.156338
1379130_at	BF396303	CDW92 antigen	Cdw92	1.15536	0.0695242	1.06443	0.0862498	1.12897	0.495492	0.977678	0.675026
1372651_at	AI144726	CDW92 antigen	Cdw92	1.18859	0.370024	0.193966	0.000146785	1.68796	0.21156	0.297775	0.082254
1370935_at	AI105205	CDW92 antigen	Cdw92	1.26348	0.384493	0.640432	0.111202	1.26809	0.332775	0.568481	0.0929275
1381870_at	BG377539	CDW92 antigen	Cdw92	0.930948	0.677481	0.752646	0.258351	1.09467	0.0823214	0.733983	0.178349
1373054_at	AA801076	CDW92 antigen	Cdw92	0.901548	0.722638	0.585039	0.063971	1.08431	0.895392	0.659129	0.167593
1374620_at	BM392373	CEA-related cell adhesion molecule 1	Ceacam1	1.03315	0.770532	0.542555	0.0125733	1.39073	0.218176	0.622524	0.0100457
1385767_at	BF411017	cell adhesion molecule JCAM	LOC304000	0.777027	0.165883	0.67733	0.035279	1.38945	0.471426	0.828881	0.699758
1396317_at	AI764350	cell cycle progression 1 (predicted)	Ccpg1_predicted	0.535526	0.0829283	0.213814	0.000121579	0.777784	0.0243472	0.358281	0.0061051
1375027_at	AI407365	Cell cycle progression 1 (predicted)	Ccpg1_predicted	0.576579	0.369987	0.679029	0.00997547	0.620478	0.063453	0.659683	0.00574139
1376199_at	BF419187	cell cycle related kinase	Ccrk	0.801824	0.306198	0.965755	0.803322	0.766984	0.240164	0.686007	0.714651
1387371_at	NM_133571	cell division cycle 25 homolog A (S. cerevisiae)	Cdc25a	1.10088	0.202371	1.53106	0.00188954	0.959144	0.501929	1.46068	0.00329821
1377558_at	BF393165	Cell division cycle 25 homolog A (S. cerevisiae)	Cdc25a	1.25821	0.787415	1.50733	0.61963	1.09416	0.280238	1.05107	0.239549
1370034_at	NM_133572	cell division cycle 25 homolog B (S. cerevisiae)	Cdc25b	0.986116	0.618303	0.256799	0.00452985	0.995995	0.9583	0.21933	0.00157296
1388727_at	BM387151	cell division cycle 26	Cdc26	0.608897	0.0698955	0.339315	0.00270637	0.347826	0.0108408	0.437488	0.0213835
1372339_at	AA866438	cell division cycle 26	Cdc26	1.1381	0.140606	1.03819	0.463655	0.798762	0.122436	0.732484	0.106265
1388534_at	AA851369	Cell division cycle 26	Cdc26	0.471036	0.634559	1.2671	0.0376912	0.424775	0.100326	0.936062	0.0723839
1382664_at	AW525662	cell division cycle 27 homolog (S. cerevisiae)	Cdc27	1.3765	0.111732	2.10656	0.00145938	0.987083	0.360559	1.35429	0.00713168
1393534_at	AI059500	Cell division cycle 2-like 5 (cholinesterase-related cell division controller)	Cdc2l5	1.68687	0.0744257	1.05491	0.822914	1.00816	0.435674	0.851034	0.921788
1386164_at	AI170800	Cell division cycle 2-like 5 (cholinesterase-related cell division controller)	Cdc2l5	1.00037	0.73402	1.48961	0.018268	0.998842	0.108754	0.827524	0.837157
1398574_a_at	AI170800	cell division cycle 2-like 5 (cholinesterase-related cell division controller)	Cdc2l5	0.985966	0.760824	1.13493	0.804961	0.796569	0.133479	1.05354	0.343026
1388286_a_at	L38482	cell division cycle 34 homolog (S. cerevisiae) (predicted)	Cdc34_predicted	0.788948	0.424541	2.56758	0.00853335	0.969261	0.438945	2.39335	0.000654053
1388400_at	BG375350	cell division cycle 34 homolog (S. cerevisiae) (predicted)	Cdc34_predicted	1.19927	0.799463	1.92919	0.00161633	0.965465	0.867293	2.31384	0.0077722
1367453_at	NM_053743	cell division cycle 37 homolog (S. cerevisiae)	Cdc37	0.931708	0.971379	1.81927	0.0165189	0.792008	0.0729246	1.46021	0.0338101
1374074_at	BF285292	cell division cycle 37 homolog (S. cerevisiae)-like 1	Cdc37l1	0.628984	0.137107	0.611048	0.0256704	0.700963	0.0737242	0.646508	0.015501
1392673_at	BF552510	cell division cycle 37 homolog (S. cerevisiae)-like 1	Cdc37l1	1.04483	0.615399	1.85265	0.265212	0.881167	0.769264	2.138	0.167747
1388724_at	BF284434	cell division cycle 40 homolog (yeast) (predicted)	Cdc40_predicted	0.909056	0.896238	1.41956	0.0946728	0.715474	0.128916	1.52718	0.106375
1370825_a_at	AA925473	cell division cycle 42 homolog (S. cerevisiae)	Cdc42	0.913014	0.939425	1.38722	0.00640315	0.837303	0.248268	1.28385	0.031055
1398793_at	NM_053527	cell division cycle 5-like (S. pombe)	Cdc5l	0.697376	0.412117	0.933096	0.764825	0.652863	0.362243	1.05142	0.366497
1379346_at	BI290578	cell division cycle 73, Paf1/RNA polymerase II complex component, homolog (S. cerevisiae)	Cdc73	0.82821	0.578455	1.45399	0.063466	0.924322	0.750039	1.17644	0.129655
1383940_at	BG375704	cell division cycle associated 1	Cdca1	1.00263	0.987248	0.634615	0.100788	1.34371	0.219243	0.636683	0.094636
1374739_at	AI236771	cell division cycle associated 4	Cdca4	0.926651	0.629358	1.35454	0.624364	1.20553	0.850733	1.25325	0.315005
1387244_at	NM_053899	cell growth regulator with ring finger domain 1	Cgrrf1	1.3806	0.233382	1.91535	0.0112861	1.22492	0.260386	2.23266	8.87835e-05
1368141_at	AF242550	cellular nucleic acid binding protein 1	Cnbp1	0.956924	0.823723	1.18866	0.0694938	0.838326	0.379827	1.28824	0.00114952
1381968_at	AI029175	cellular repressor of E1A-stimulated genes (predicted)	Creg_predicted	0.832838	0.295157	7.04051	0.000701298	0.774148	0.188278	4.65694	0.00105185
1375428_at	BE099979	cellular repressor of E1A-stimulated genes (predicted)	Creg_predicted	0.955187	0.452303	2.80987	0.00743506	1.03423	0.829477	1.35975	0.0995281
1369725_at	NM_020101	centaurin, alpha 2	Centa2	1.47481	0.797016	0.888856	0.505976	1.26445	0.278898	0.878772	0.298831
1392815_at	BE114489	Centaurin, delta 1 (predicted)	Centd1_predicted	3.36624	0.00190796	1.33182	0.00504033	1.98478	0.0216451	1.11304	0.0572943
1388511_at	AI412079	centaurin, delta 2	Centd2	1.89001	6.06018e-05	1.35845	0.936329	1.76015	0.0415423	1.17347	0.639391
1377926_at	AA924061	Centaurin, gamma 2 (predicted)	Centg2_predicted	1.16564	0.628548	1.02774	0.0628554	0.727542	0.273411	1.534	0.8113
1383834_at	BI285391	centaurin, gamma 3 (predicted)	Centg3_predicted	0.856363	0.380079	0.907195	0.305883	0.671983	0.12623	0.762427	0.131445
1375977_at	AA958015	centrin 2	Cetn2	0.607933	0.508334	0.481792	0.00037985	0.700018	0.0703947	0.794583	0.0207934
1388141_at	BI293883	centrin 3	Cetn3	0.974731	0.324798	1.51184	0.0650224	0.604024	0.0434437	1.24898	0.343078
1385349_at	BF389818	centrin 4 (predicted)	Cetn4_predicted	1.56074	0.0633798	0.605541	0.161541	1.43868	0.176017	0.746829	0.167625
1372883_at	BE109061	centromere autoantigen B (predicted)	Cenpb_predicted	0.744356	0.00736958	0.909596	0.739039	0.650262	0.0100069	1	0.894077
1379538_at	BE104961	centromere protein J (predicted)	Cenpj_predicted	5.32224	0.00855853	2.69979	0.0422876	11.6637	0.0167339	2.7275	0.0015281
1382613_at	AW144049	Centrosomal protein 152 (predicted)	Cep152_predicted	1.76642	0.220644	4.40085	0.000143811	0.835602	0.414945	3.78541	0.0403542
1382765_at	AA996645	centrosomal protein 27 (predicted)	Cep27_predicted	0.651753	0.125498	1.58949	0.063201	0.640108	0.202378	1.58809	0.0575505
1377829_at	BI291153	centrosomal protein 57	Cep57	0.576966	0.0270584	0.623761	0.0177725	0.482296	0.0300507	0.63852	0.0105546
1378274_at	BF389658	Centrosomal protein 76	Cep76	0.66478	0.183641	1.22196	0.0228164	0.935449	0.752683	1.15139	0.146967
1385824_at	BF388819	centrosome-associated protein 350	Cap350	1.25233	0.4091	2.26176	0.0755974	2.1839	0.0352373	3.10724	0.134613
1375987_at	AW525194	ceramide kinase (predicted)	Cerk_predicted	0.794316	0.192185	0.4442	0.00323725	0.661631	0.00421916	0.541792	0.0153939
1374139_at	BG671589	cerebellar degeneration-related 2	Cdr2	0.658977	0.887936	2.4656	0.00106508	0.95739	0.91211	2.2501	0.00332285
1381972_at	BG673626	cereblon	Crbn	0.688722	0.114803	0.836976	0.127036	0.830948	0.142659	0.956996	0.279364
1377047_at	AI710879	Cereblon	Crbn	0.788679	0.555321	0.312481	0.00274053	0.75711	0.0589256	0.400832	0.00620185
1383177_at	AI232085	Cereblon	Crbn	0.665518	0.64371	0.648078	0.0809155	0.729307	0.270436	0.634941	0.0321907
1378479_at	BI285912	ceroid lipofuscinosis, neuronal 3, juvenile (Batten, Spielmeyer-Vogt disease)	Cln3	1.13754	0.385225	1.7807	0.158945	6.79115	0.0148279	1.43436	0.30974
1389598_at	BI280367	ceroid-lipofuscinosis, neuronal 6 (predicted)	Cln6_predicted	0.356976	0.000918062	0.977385	0.623246	0.351732	0.00712817	0.917369	0.047301
1375026_at	AI105369	ceroid-lipofuscinosis, neuronal 6 (predicted)	Cln6_predicted	0.771133	0.293516	1.01799	0.986989	0.579394	0.0238369	0.569427	0.365134
1389791_at	AI179775	ceroid-lipofuscinosis, neuronal 8	Cln8	0.198118	0.119203	0.387645	0.000217912	0.301931	0.000349574	0.48319	0.00136357
1368419_at	AF202115	ceruloplasmin	Cp	65.8754	7.47546e-06	38.543	0.000153038	145.013	0.000198236	41.9804	9.84931e-05
1368418_a_at	AF202115	ceruloplasmin	Cp	38.3197	0.00176831	41.9739	0.000239822	52.4719	0.000428143	60.2542	0.00150895
1368420_at	NM_012532	ceruloplasmin	Cp	57.8696	0.0022667	40.2263	0.00170033	121.71	5.66601e-06	55.0327	0.0046459
1374557_at	BF394235	CG6210-like	LOC362065	0.498356	0.376075	0.998682	0.990013	0.507966	0.31625	1.10946	0.799119
1382427_at	BG373237	CGG triplet repeat binding protein 1 (predicted)	Cggbp1_predicted	2.50793	0.0796115	10.2311	0.0159498	1.41347	0.0206071	4.33858	0.074482
1375280_at	AW913871	CGI-146 protein	PNAS-4	0.664088	0.668707	1.77151	0.0545342	0.773961	0.292161	1.72928	0.330918
1376312_a_at	BI284236	CGI-146 protein	PNAS-4	0.988756	0.9645	1.27614	0.97249	1.20156	0.898077	1.58884	0.0902269
1380665_at	BF418059	CGI-58-like protein	LOC316122	1.40111	0.0284424	1.35024	0.0462106	1.11184	0.0882367	1.22761	0.0625236
1389573_at	AI170665	ChaC, cation transport regulator-like 1 (E. coli) (predicted)	Chac1_predicted	2.18154	0.0854256	1.48535	0.062681	1.23707	0.900145	1.05437	0.0606321
1372536_at	AI105042	chaperone, ABC1 activity of bc1 complex like (S. pombe)	Cabc1	0.313534	0.00267293	0.0840186	0.000558433	0.315963	0.000751955	0.119781	0.0174757
1371418_at	BG665035	chaperonin containing TCP1, subunit 2 (beta)	Cct2	0.499143	0.12034	1.03206	0.49551	0.476933	0.0557011	0.88858	0.336708
1371403_at	AA799545	chaperonin subunit 3 (gamma)	Cct3	0.787106	0.120368	1.68356	0.00104167	0.58826	0.00305875	1.40696	0.00209533
1390261_at	AI059850	Chaperonin subunit 3 (gamma)	Cct3	1.38132	0.163999	1.90413	0.00273484	1.2077	0.881707	1.48162	0.00855432
1371656_at	BI283657	chaperonin subunit 4 (delta)	Cct4	0.830195	0.276968	1.74666	6.97336e-06	0.721826	0.0141391	1.53848	0.00553772
1376570_at	BF417274	chaperonin subunit 5 (epsilon)	Cct5	0.838638	0.534958	1.81343	0.0057251	0.667858	0.0135776	1.79311	0.00537118
1395508_at	BG665309	chaperonin subunit 5 (epsilon)	Cct5	0.545379	0.904393	0.998409	0.994653	0.786909	0.146463	1.42985	0.351736
1398960_at	AI172328	chaperonin subunit 6a (zeta)	Cct6a	0.894558	0.148766	1.10829	0.293565	0.764951	0.0116142	1.12558	0.282066
1377006_at	AA875047	Chaperonin subunit 6a (zeta)	Cct6a	0.997985	0.989669	1.11579	0.321335	0.790631	0.488677	0.898706	0.137649
1371641_at	BM388827	chaperonin subunit 7 (eta) (predicted)	Cct7_predicted	0.793447	0.325782	1.73071	0.00330292	0.817024	0.0606002	1.59153	0.00344317
1392918_at	BE115650	chaperonin subunit 8 (theta) (predicted)	Cct8_predicted	0.737353	0.257454	1.34302	0.000456461	0.626212	0.0494423	1.18836	0.00144957
1373784_at	BF409759	chaperonin subunit 8 (theta) (predicted)	Cct8_predicted	0.990544	0.979467	0.770871	0.592011	1.06477	0.203181	1.07151	0.797708
1372787_at	BE106508	charged amino acid rich leucine zipper 1	Crlz1	0.994451	0.887667	2.18382	0.00599873	0.969469	0.992582	1.87689	0.00788513
1387062_a_at	NM_080400	checkpoint kinase 1 homolog (S. pombe)	Chek1	1.45861	0.0611243	2.02879	0.063543	1.97682	0.00200666	0.989373	0.233698
1384728_at	BE112826	checkpoint suppressor 1 (predicted)	Ches1_predicted	1.12505	0.295892	1.0025	0.981248	1.08475	0.323503	1.15365	0.163976
1377713_at	AI639381	checkpoint suppressor 1 (predicted)	Ches1_predicted	1.4033	0.406107	0.869998	0.5093	0.760044	0.557207	0.851757	0.0810703
1383313_at	BE120149	checkpoint with forkhead and ring finger domains	Chfr	0.911306	0.583351	0.558882	0.000554913	0.875744	0.154578	0.59708	0.00504663
1367973_at	NM_031530	chemokine (C-C motif) ligand 2	Ccl2	962.723	0.00502874	511.882	0.00354573	987.11	0.00422946	124.055	0.00210128
1369814_at	AF053312	chemokine (C-C motif) ligand 20	Ccl20	168.86	7.0195e-05	139.685	4.02753e-06	62.2052	0.00632272	14.8625	0.00417352
1376850_a_at	AI058901	chemokine (C-C motif) ligand 27 (predicted)	Ccl27_predicted	1.01217	0.0963631	0.976395	0.602227	1.00155	0.5575	1.0002	0.995664
1369983_at	NM_031116	chemokine (C-C motif) ligand 5	Ccl5	0.596785	0.316587	4.41815	0.00885814	77.4316	4.09179e-05	182.099	0.000153217
1379935_at	BF419899	chemokine (C-C motif) ligand 7	Ccl7	131.265	0.000642521	59.2962	0.000212105	128.02	0.000658532	7.41366	0.000583876
1392737_at	AI044644	Chemokine (C-C motif) receptor 5	Ccr5	0.740953	0.395855	0.993752	0.782188	0.912875	0.217809	1.04853	0.322559
1398591_at	AI707080	chemokine (C-C motif) receptor-like 2 (predicted)	Ccrl2_predicted	1.0059	0.988058	1.00153	0.976992	2.96182	0.037321	0.997486	0.983434
1368200_at	NM_134455	chemokine (C-X3-C motif) ligand 1	Cx3cl1	13.0409	0.0134073	1.00479	0.825523	13.3287	0.00738857	1.00325	0.321021
1387316_at	NM_030845	chemokine (C-X-C motif) ligand 1	Cxcl1	392.45	0.000270495	189.826	0.000537365	36.359	0.0238969	6.64114	0.00225324
1387969_at	U22520	chemokine (C-X-C motif) ligand 10	Cxcl10	262.954	0.0153555	80.6684	0.0193811	332.406	0.0143625	188.777	0.0124468
1379365_at	BF281987	chemokine (C-X-C motif) ligand 11	Cxcl11	79.7321	0.00497891	128.18	0.0101225	93.6889	0.00514685	151.358	0.00884089
1369633_at	AI171777	chemokine (C-X-C motif) ligand 12	Cxcl12	1.4998	0.0322739	1.18142	0.195684	1.48609	0.169417	1.0641	0.0832006
1368760_at	NM_053647	chemokine (C-X-C motif) ligand 2	Cxcl2	282.144	0.000788685	47.3359	0.00146174	15.91	0.056092	1.53525	0.332231
1382454_at	AI044222	chemokine (C-X-C motif) ligand 9	Cxcl9	290.483	6.98342e-05	197.18	0.00499363	913.843	0.000728087	334.675	0.00385857
1373544_at	AI170387	chemokine (C-X-C motif) ligand 9	Cxcl9	238.152	0.00055777	199.846	0.00275642	587.954	0.00188745	287.997	0.00152212
1387984_at	AF253065	chemokine-like factor	Cklf	6.66879	0.0394444	2.30894	0.123046	4.57639	0.0282984	2.63829	0.0387497
1387956_s_at	AF253064	chemokine-like factor	Cklf	2.13774	0.335665	1.92003	0.126161	3.28307	0.294463	2.76049	0.0617868
1381009_at	BF403637	Chemokine-like receptor 1	Cmklr1	1.04885	0.910638	0.997149	0.248529	0.995861	0.982712	0.999012	0.543704
1368287_at	NM_032083	chimerin (chimaerin) 1	Chn1	1.07171	0.208161	0.754157	0.0250414	1.46078	0.250337	1.09109	0.551398
1391386_at	AI412693	Chimerin (chimaerin) 1	Chn1	1.00029	0.630418	1.18851	0.896142	0.882988	0.592326	0.950081	0.562424
1368331_at	NM_031023	chitobiase, di-N-acetyl-	Ctbs	0.955483	0.377428	1.07996	0.520533	1.10446	0.778727	1.22197	0.405464
1369010_at	NM_053677	CHK2 checkpoint homolog (S. pombe)	Chek2	1.19121	0.61266	0.622139	0.168129	0.959734	0.6983	0.673342	0.16745
1392453_at	AI763523	chloride channel 3	Clcn3	0.766593	0.254088	0.852926	0.119225	0.549597	0.068156	1.01685	0.135442
1380547_at	BI288519	chloride channel 3	Clcn3	0.578452	0.277329	0.649251	0.171234	0.398875	0.22228	0.643869	0.152437
1367893_a_at	NM_133414	chloride channel CLIC-like 1	Clcc1	0.824979	0.628934	1.36324	0.125227	0.733084	0.105377	0.849786	0.18471
1367772_at	NM_031719	chloride channel, nucleotide-sensitive, 1A	Clns1a	0.807387	0.0636749	0.927611	0.18635	0.871635	0.086837	1.17054	0.15862
1375633_at	AI012221	chloride intracellular channel 1	Clic1	1.6577	0.0361459	1.41643	0.0566829	1.31552	0.0395488	1.1363	0.00395504
1381993_at	BI293548	chloride intracellular channel 2	Clic2	2.53989	0.78226	1.01229	0.810316	2.74795	0.230931	0.984962	0.922341
1377765_at	AA848723	chloride intracellular channel 4	Clic4	5.62347	0.0706293	6.05435	0.0252312	7.15842	0.000668769	6.35197	0.00232058
1387420_at	NM_031818	chloride intracellular channel 4	Clic4	1.3956	0.11712	1.37454	0.164231	1.72944	0.196116	1.37654	0.0525722
1387032_at	NM_012829	cholecystokinin	Cck	0.987284	0.924524	1.10533	0.803059	0.988634	0.895994	1.10888	0.925648
1369787_at	NM_012688	cholecystokinin A receptor	Cckar	0.229015	0.00268347	0.0552591	0.000843275	0.253177	0.0174514	0.106393	0.0362187
1380063_at	AI169398	cholesterol 25-hydroxylase	Ch25h	2.24109	0.162816	0.982561	0.73423	4.34025	0.0504241	0.989283	0.777354
1368692_a_at	AW140851	choline kinase alpha	Chka	1.36941	0.29898	2.11253	0.00122555	1.03667	0.699044	1.45015	0.00490987
1367718_at	NM_017177	choline kinase beta	Chkb	0.947782	0.803451	0.991548	0.24616	0.934738	0.385572	0.784204	0.026821
1379770_at	BF282951	choline phosphotransferase 1	Chpt1	0.724102	0.120611	0.840059	0.204769	0.724546	0.119866	0.845585	0.250399
1388977_at	BM390401	choline/ethanolamine phosphotransferase 1	Cept1	1.2817	0.379342	1.90862	0.00338744	1.88385	0.0505275	2.15522	0.00641904
1387462_at	NM_012527	cholinergic receptor, muscarinic 3	Chrm3	0.935444	0.940231	1.05796	0.830232	0.917393	0.674811	0.765508	0.797789
1395429_at	BF281401	Cholinergic receptor, nicotinic, alpha polypeptide 7	Chrna7	1.42835	0.258684	1.59722	0.308458	1.86394	0.133852	1.93168	0.123744
1369091_at	NM_012528	cholinergic receptor, nicotinic, beta polypeptide 1 (muscle)	Chrnb1	0.97568	0.317557	0.677832	0.367022	1.02084	0.113232	0.907136	0.431108
1373561_at	AI012498	chondroitin polymerizing factor	D1bwg1363e	0.559862	0.113272	0.517362	0.00300674	0.555722	0.0304813	0.410168	0.00963997
1390072_at	BF401531	Chondroitin sulfate proteoglycan 4	Cspg4	0.998773	0.830969	1.09393	0.512078	0.99821	0.995387	1.00697	0.509316
1387080_at	NM_031583	chondroitin sulfate proteoglycan 6	Cspg6	0.757281	0.329928	1.01684	0.541434	0.693416	0.00346701	0.899751	0.307549
1390668_at	BG378312	chondroitin sulfate proteoglycan 6	Cspg6	0.891134	0.771008	1.57117	0.727212	1.26791	0.502813	2.37103	0.294869
1388943_at	BI279670	chromatin accessibility complex 1 (predicted)	Chrac1_predicted	0.913707	0.498416	0.653855	0.0783297	0.9768	0.884261	0.826	0.198661
1367512_at	AA998435	chromatin modifying protein 5	Chmp5	1.14133	0.128243	1.17511	0.026881	1.45443	0.00949106	1.32286	0.0179748
1388510_at	BI289511	chromatin modifying protein 6 (predicted)	Chmp6_predicted	0.685266	0.215857	1.39367	0.0218781	0.48674	0.0489021	1.06937	0.0200102
1374695_at	BF564593	Chromobox homolog 1 (Drosophila HP1 beta) (predicted)	Cbx1_predicted	1.61032	0.0131928	1.77738	0.0038026	2.00262	0.000438968	1.65805	0.00311928
1385157_at	BF389675	chromobox homolog 1 (Drosophila HP1 beta) (predicted)	Cbx1_predicted	1.32656	0.11635	2.64824	0.0161933	2.95304	0.00175064	1.63041	0.0253182
1371395_at	AA851329	chromobox homolog 3 (HP1 gamma homolog, Drosophila)	Cbx3	0.651205	0.00206393	0.803822	0.0154185	0.515076	0.0141401	0.802929	0.00236893
1373885_at	BF398015	chromobox homolog 5 (Drosophila HP1a) (predicted)	Cbx5_predicted	0.97164	0.575468	1.5444	0.110171	1.412	0.396352	1.37655	0.214664
1375307_at	BI275772	chromobox homolog 6	Cbx6	0.64637	0.135374	0.490721	0.0528276	0.546213	0.219044	0.624456	0.0297309
1371672_at	AI406275	chromobox homolog 7	Cbx7	0.256737	0.0195118	0.347046	0.0077822	0.577339	0.0636164	0.464851	0.0223026
1376008_at	BI275819	chromobox homolog 8 (Drosophila, Pc class)	Cbx8	0.908652	0.574861	0.910323	0.0872654	0.892388	0.309318	0.501448	0.0770615
1389469_at	AA858645	chromodomain helicase DNA binding protein 1-like (predicted)	Chd1l_predicted	1.58491	0.0603097	0.771274	0.4168	1.24459	0.363698	0.72719	0.0620022
1379830_at	BF396633	Chromodomain helicase DNA binding protein 2 (predicted)	Chd2_predicted	1.53304	0.0225492	1.3445	0.0131304	1.40333	0.0773537	1.42624	0.00128061
1397779_at	BF562254	Chromodomain helicase DNA binding protein 2 (predicted)	Chd2_predicted	0.975647	0.0625645	0.983991	0.123212	1.04889	0.734332	1.45858	0.0543856
1381683_at	BE118824	chromodomain helicase DNA binding protein 2 (predicted)	Chd2_predicted	1.10143	0.965512	1.32405	0.385808	1.00254	0.471205	1.57894	0.56798
1397200_at	BF412612	chromodomain helicase DNA binding protein 4	Chd4	0.768329	0.0914358	0.743646	0.29267	0.667341	0.0280576	0.704194	0.120456
1385779_at	BF413917	chromodomain helicase DNA binding protein 4	Chd4	0.873082	0.107028	0.996339	0.347755	0.874048	0.425048	0.986562	0.801455
1372441_at	BE107091	chromodomain helicase DNA binding protein 4	Chd4	0.684075	0.419904	0.88901	0.987608	0.979284	0.465935	1.11546	0.291847
1379580_at	BF398050	chromodomain helicase DNA binding protein 6 (predicted)	Chd6_predicted	0.536048	0.0423321	0.405189	0.00187959	0.711152	0.322855	0.674755	0.144918
1378361_at	BF523068	chromodomain helicase DNA binding protein 7 (predicted)	Chd7_predicted	1.01244	0.0877369	1.39001	0.106603	0.789314	0.990502	1.21948	0.298776
1382504_at	AI599104	chromodomain helicase DNA binding protein 7 (predicted)	Chd7_predicted	0.979707	0.998957	1.00125	0.992146	0.98083	0.696389	0.999172	0.992691
1375527_at	BF282681	chromodomain helicase DNA binding protein 8	Chd8	0.580978	0.31171	1.14854	0.284433	1.03919	0.806002	1.12455	0.557681
1387235_at	NM_021655	chromogranin A	Chga	0.639448	0.42467	0.298518	0.000677178	0.648892	0.0131154	0.266219	0.00733086
1368034_at	NM_012526	chromogranin B	Chgb	0.793396	0.267438	0.298462	0.000197324	0.66378	0.0028721	0.345748	0.00430139
1398974_at	AI171615	chromosome segregation 1-like (S. cerevisiae) (predicted)	Cse1l_predicted	0.677418	0.468217	1.21577	0.0080335	0.705208	0.0149899	1.00426	0.204073
1399094_at	AA859919	churchill domain containing 1 (predicted)	Churc1_predicted	0.79971	0.461102	0.931646	0.450739	0.891582	0.599231	0.759077	0.844944
1370107_at	NM_054009	chymotrypsin-like	Ctrl	1.00076	0.998247	1.25483	0.328349	5.24762	0.10002	2.72115	0.0286828
1369951_at	NM_012536	Chymotrypsinogen B	Ctrb	0.919718	0.121588	0.22615	0.111431	1.40027	0.0846568	0.256496	0.0288799
1389577_at	AI101160	cirrhosis, autosomal recessive 1A (human)	Cirh1a	0.363676	0.0117016	1.04986	0.581982	0.363525	0.00462361	1.37676	0.0889199
1386942_at	NM_022596	cis-Golgi matrix protein GM130	Golga2	0.820995	0.965152	1.1817	0.02267	0.705222	0.40227	0.860804	0.519396
1374190_at	BG380750	citrate lyase beta like	Clybl	0.661858	0.227077	0.117086	0.000244801	0.642804	0.213718	0.111812	0.0158627
1369967_at	NM_130755	citrate synthase	Cs	0.754755	0.292723	3.23305	0.0116259	0.581782	0.281495	2.75612	0.00250933
1375295_at	AI009657	Citrate synthase	Cs	0.732199	0.450876	1.42104	0.0062668	0.601962	0.00433827	1.31114	0.023369
1389137_at	AA957183	Citron	Cit	0.801913	0.280943	1.08795	0.564837	0.675278	0.119629	0.800096	0.225969
1372056_at	AI406687	CKLF-like MARVEL transmembrane domain containing 6	Cmtm6	2.34594	0.00395341	1.06837	0.370178	4.07726	0.00124461	1.89849	0.0255146
1398842_at	BM386513	clathrin, heavy polypeptide (Hc)	Cltc	0.601461	0.00141196	0.635695	0.0039072	0.729525	0.00140646	0.75142	0.0436309
1386875_a_at	M19261	clathrin, light polypeptide (Lca)	Clta	1.164	0.588972	2.03451	0.00324872	0.984979	0.936021	1.86572	0.00685828
1375324_at	BE095893	Clathrin, light polypeptide (Lcb)	Cltb	0.401504	0.48475	0.901423	0.73044	0.46841	0.0841596	0.782013	0.217547
1367907_a_at	M19262	clathrin, light polypeptide (Lcb)	Cltb	0.687096	0.548399	1.20784	0.914394	0.53806	0.00449919	0.8512	0.25465
1376711_at	BG673439	claudin 11	Cldn11	0.651903	0.0193849	1.58054	0.0971404	1.78462	0.00226022	1.50655	0.211045
1369184_at	NM_131905	claudin 16	Cldn16	1.01342	0.972272	0.997615	0.956264	1.00601	0.938642	1.00017	0.982616
1388547_at	BE328951	claudin 4	Cldn4	9.73668	0.00106054	4.20573	0.00360659	3.53329	0.153586	2.27928	0.0161942
1370894_at	AJ011811	claudin 7	Cldn7	1.23551	0.472636	1.33589	0.940682	0.859369	0.27559	0.999804	0.999333
1390407_at	AA955196	claudin domain containing 1	Cldnd1	0.712739	0.360903	1.00615	0.0906085	0.662599	0.013463	0.888908	0.164797
1377935_at	AI231223	Claudin domain containing 1	Cldnd1	0.6403	0.42304	0.963035	0.0577573	0.796438	0.227727	0.686433	0.0814872
1377670_at	AW915580	cleavage and polyadenylation factor subunit homolog (S. cerevisiae) (predicted)	Pcf11_predicted	1.15032	0.0542763	0.765048	0.0318262	1.24553	0.0142042	0.866871	0.0674593
1374666_at	BI298206	Cleavage and polyadenylation factor subunit homolog (S. cerevisiae) (predicted)	Pcf11_predicted	0.657914	0.0578704	0.952629	0.797706	0.923526	0.0731062	0.905477	0.590392
1393692_at	AA965160	cleavage and polyadenylation factor subunit homolog (S. cerevisiae) (predicted)	Pcf11_predicted	0.798949	0.465963	1.27703	0.686207	0.749456	0.354104	0.652185	0.241419
1376004_at	BF285297	Cleavage and polyadenylation specific factor 5	Cpsf5	0.806667	0.268783	0.722138	0.113661	0.689265	0.186967	0.66411	0.0100589
1397288_at	BM390376	Cleavage and polyadenylation specific factor 5	Cpsf5	3.15585	0.357801	0.455698	0.0407716	0.581943	0.395452	0.331156	0.0196154
1398356_at	BF420718	cleavage and polyadenylation specific factor 5	Cpsf5	1.11745	0.72793	1.72456	0.0448661	0.667383	0.322698	1.54956	0.0326101
1376811_a_at	BE108383	cleavage and polyadenylation specific factor 6, 68kDa (predicted)	Cpsf6_predicted	0.678097	0.085798	2.63963	0.000609309	0.890549	0.390365	2.14037	0.00782557
1379729_at	AI071906	Cleavage and polyadenylation specific factor 6, 68kDa (predicted)	Cpsf6_predicted	0.800559	0.919529	1.30694	0.294663	0.635037	0.267769	1.12397	0.13201
1374711_at	BF283512	cleavage and polyadenylation specificity factor 3	Cpsf3	0.642228	0.483655	0.589094	0.128451	0.406481	0.0191832	1.00194	0.912902
1383115_at	AW522557	Cleavage stimulation factor, 3' pre-RNA subunit 2, tau (predicted)	Cstf2t_predicted	1.05319	0.708769	0.738202	0.224604	1.25744	0.0469481	1.11786	0.0500712
1389348_at	BF282442	cleavage stimulation factor, 3' pre-RNA, subunit 1	Cstf1	0.898886	0.0319689	2.00315	0.0595612	0.926242	0.0856954	0.999214	0.998065
1384935_at	AI070621	Cleavage stimulation factor, 3' pre-RNA, subunit 3 (predicted)	Cstf3_predicted	1.29904	0.0799363	1.54627	0.0457948	1.49	0.0125715	1.12257	0.131994
1396900_at	BE106436	Cleavage stimulation factor, 3' pre-RNA, subunit 3 (predicted)	Cstf3_predicted	1.20213	0.2109	1.065	0.796756	0.999107	0.987219	0.998429	0.762356
1371473_at	BI284472	cleft lip and palate associated transmembrane protein 1 (predicted)	Clptm1_predicted	0.587104	0.849176	0.731356	0.193791	0.687078	0.618161	0.85145	0.118451
1368099_at	NM_053722	CLIP associating protein 2	Clasp2	0.765222	0.551815	0.589352	0.00919886	1.7206	0.106514	0.712394	0.0289111
1392560_at	BG153281	Clone UI-R-FJ0-cpu-i-10-0-UI unknown mRNA	---	1.31615	0.124519	1.06078	0.813829	1.23043	0.451225	0.880452	0.149442
1371579_at	AI012456	Clone UI-R-FJ0-cpu-m-15-0-UI unknown mRNA	---	0.648495	0.0213802	0.614345	0.0125992	0.748698	0.0236501	0.753433	0.0370254
1367997_at	NM_022947	ClpB caseinolytic peptidase B homolog (E. coli)	Clpb	0.708404	0.0962165	1.23926	0.0323774	0.49443	0.293072	1.02974	0.780709
1367784_a_at	AF314657	clusterin	Clu	0.946625	0.686784	0.872604	0.0928693	0.905414	0.741165	1.32419	0.117948
1388246_at	AF314657	clusterin	Clu	0.89206	0.784934	0.861914	0.0304225	0.939641	0.538547	1.35809	0.236587
1379829_at	BF418799	c-myc binding protein (predicted)	Mycbp_predicted	0.789594	0.341128	0.448852	0.0353564	1.08006	0.863682	0.617754	0.0285799
1372132_at	BI279729	CNDP dipeptidase 2 (metallopeptidase M20 family)	Cndp2	0.855099	0.0945603	1.05191	0.149535	1.50821	0.0215269	1.70853	0.0305893
1389368_at	AW253242	Cnksr family member 3	Cnksr3	21.8481	0.00627312	17.0391	0.00882211	21.0406	0.00396927	14.0974	0.00230768
1388596_at	AI411057	coactosin-like 1 (Dictyostelium) (predicted)	Cotl1_predicted	0.869558	0.0928259	0.729708	0.028535	0.661398	0.0365686	0.516955	0.0255065
1369182_at	NM_013057	coagulation factor III	F3	8.65838	0.00519773	5.66262	7.48434e-05	1.01664	0.915678	2.9232	0.000905061
1388377_at	AW142717	coatomer protein complex subunit alpha	Copa	0.791773	0.349835	0.954844	0.262097	0.822847	0.348223	0.896963	0.0671166
1367461_at	NM_080781	coatomer protein complex, subunit beta 1	Copb1	0.778811	0.241374	0.913879	0.786991	0.800369	0.0990505	0.922841	0.968872
1367454_at	NM_021765	coatomer protein complex, subunit beta 2 (beta prime)	Copb2	0.796953	0.469767	1.00259	0.204254	0.823204	0.146543	0.961172	0.405626
1371802_at	AA891472	coatomer protein complex, subunit epsilon (predicted)	Cope_predicted	0.597537	0.137463	0.72488	0.0649186	0.621853	0.0309684	0.652467	0.0687392
1372464_at	BE109050	coatomer protein complex, subunit gamma	Copg	0.630667	0.316091	0.859338	0.135486	0.731111	0.12931	0.784733	0.0197166
1380430_at	BF386177	Coatomer protein complex, subunit gamma	Copg	0.792577	0.442786	1.18423	0.972866	1.23635	0.270306	0.940683	0.531304
1371810_at	BF284093	Coatomer protein complex, subunit gamma	Copg	0.685154	0.939717	0.386325	2.01413e-05	0.699719	0.30887	0.404774	0.00815908
1396754_at	BF403379	Coatomer protein complex, subunit zeta 1 (predicted)	Copz1_predicted	1.53275	0.00989089	0.993919	0.324051	2.20418	0.00225589	1.93189	0.14525
1375520_at	AI007763	Coatomer protein complex, subunit zeta 1 (predicted)	Copz1_predicted	0.699094	0.0965191	0.783341	0.0661141	0.728234	0.184609	0.831407	0.102208
1394565_at	BF406339	coatomer protein complex, subunit zeta 1 (predicted)	Copz1_predicted	0.450877	0.534293	0.864945	0.41136	0.310342	0.0924537	0.552656	0.0171182
1372305_at	AA893634	coatomer protein complex, subunit zeta 2 (predicted)	Copz2_predicted	0.552144	0.00238895	0.953575	0.998506	0.617517	0.0208254	0.921024	0.797802
1368585_at	NM_017110	cocaine and amphetamine regulated transcript	Cart	0.593242	0.55039	0.149219	0.0081628	0.650323	0.106734	0.119517	0.00540354
1373304_at	BM392002	Coenzyme A synthase	Coasy	0.458502	0.0330183	0.393646	0.00655688	0.412517	0.00145841	0.559118	0.00719466
1390281_a_at	AI407062	coenzyme Q10 homolog A (yeast) (predicted)	Coq10a_predicted	0.388828	0.0202233	0.519041	0.00095457	0.588579	0.0969452	0.478565	0.0191266
1372753_at	BI285643	coenzyme Q6 homolog (yeast)	Coq6	0.688631	0.394832	2.15444	0.00319811	0.318365	0.027039	1.32055	0.089321
1371909_at	AA850406	cofactor required for Sp1 transcriptional activation, subunit 3	Crsp3	1.18081	0.10304	0.835544	0.0663627	1.18441	0.101394	1.16954	0.663748
1398344_at	BI287962	cofactor required for Sp1 transcriptional activation, subunit 6	Crsp6	2.99945	0.00568344	1.56183	0.0486917	3.77074	0.000366179	1.08367	0.339299
1377263_at	BF399036	cofactor required for Sp1 transcriptional activation, subunit 9 (predicted)	Crsp9_predicted	0.770683	0.299114	0.934631	0.974356	1.28421	0.0210427	1.20104	0.23584
1370184_at	BG666614	cofilin 1, non-muscle	Cfl1	1.01579	0.41644	1.55801	0.0283318	0.813081	0.26794	1.17098	0.0725579
1387871_at	BM389673	cofilin 1, non-muscle	Cfl1	1.08943	0.471873	1.13018	0.0622286	0.853314	0.222276	1.09821	0.00512939
1388928_at	BF399310	cofilin 2, muscle (predicted)	Cfl2_predicted	0.877206	0.31988	0.989064	0.83295	0.639702	0.209592	0.819412	0.385653
1388483_at	BI296011	cofilin 2, muscle (predicted)	Cfl2_predicted	1.04793	0.860657	2.05018	0.00656626	0.976733	0.328837	1.83207	0.016802
1377254_a_at	BI295640	Cohen syndrome homolog 1 (predicted)	Cohh1_predicted	0.966665	0.379401	0.780185	0.0027088	1.04067	0.754539	0.795581	0.0476925
1375864_at	BI274151	coiled-coil and C2 domain containing 1B	Cc2d1b	0.85646	0.525015	1.33449	0.958881	1.62873	0.0548183	1.01115	0.699449
1375938_at	BF411424	coiled-coil domain containing 12 (predicted)	Ccdc12_predicted	1.36815	0.664286	0.779703	0.66862	0.755955	0.507334	1.15266	0.516248
1373171_at	BI294854	coiled-coil domain containing 21	Ccdc21	0.98247	0.726668	1.44301	0.0339222	0.872652	0.121578	1.23256	0.159653
1372361_at	AW529931	coiled-coil domain containing 22 (predicted)	Ccdc22_predicted	0.643107	0.0940658	1.40647	0.0113416	0.755618	0.965688	1.27974	0.0862224
1378406_at	BF394636	Coiled-coil domain containing 39 (predicted)	Ccdc39_predicted	0.692418	0.712623	0.915601	0.975465	0.864717	0.820463	1.15848	0.534248
1397358_at	AI105407	coiled-coil domain containing 39 (predicted)	Ccdc39_predicted	1.00706	0.973699	0.998082	0.674198	0.999222	0.313532	1.00075	0.0933902
1388736_at	AI175383	coiled-coil domain containing 43	Ccdc43	0.77585	0.718996	1.31099	0.0415099	0.988105	0.488402	1.32499	0.0553224
1387944_at	AF092207	coiled-coil domain containing 5	Ccdc5	1.14953	0.592468	0.74328	0.0245924	1.89106	0.0819206	0.535461	0.0136659
1374005_at	AI233232	coiled-coil domain containing 51	Ccdc51	0.948709	0.147174	0.881795	0.131374	0.996832	0.659381	0.903277	0.160558
1375634_at	AA799472	coiled-coil domain containing 53 (predicted)	Ccdc53_predicted	0.51785	0.373752	0.371631	0.00460866	0.344529	0.00371583	0.405976	0.0151689
1373475_at	BM390469	coiled-coil domain containing 58 (predicted)	Ccdc58_predicted	0.70528	0.344558	2.67837	0.00663088	0.991606	0.932148	2.1004	0.0246908
1383271_at	BM391624	coiled-coil domain containing 59 (predicted)	Ccdc59_predicted	1.00426	0.987441	1.18961	0.149296	1.0103	0.959694	1.26974	0.652724
1389126_at	BG373580	coiled-coil-helix-coiled-coil-helix domain containing 1 (predicted)	Chchd1_predicted	0.631142	0.170482	1.57411	0.0160125	0.828573	0.173925	1.30701	0.0418958
1371312_at	AA799736	coiled-coil-helix-coiled-coil-helix domain containing 2	Chchd2	0.881425	0.440978	1.3694	0.00803715	0.893574	0.481849	1.02219	0.906744
1389291_at	AA850511	coiled-coil-helix-coiled-coil-helix domain containing 3 (predicted)	Chchd3_predicted	0.844258	0.701267	1.37452	0.0474308	0.739671	0.275646	1.38536	0.0230283
1373001_at	AA817990	coiled-coil-helix-coiled-coil-helix domain containing 4	Chchd4	1.19846	0.545903	3.98849	0.00272996	0.894614	0.454903	2.64326	0.00304673
1389625_at	BI299402	coiled-coil-helix-coiled-coil-helix domain containing 4	Chchd4	0.998663	0.925176	1.50437	0.439327	1.00068	0.985359	3.24485	0.0550467
1372134_at	AW918650	coiled-coil-helix-coiled-coil-helix domain containing 6 (predicted)	Chchd6_predicted	0.582791	0.911744	1.66141	0.008566	0.441358	0.0496371	1.65293	0.0627866
1374731_at	BI275929	Coilin	Coil	3.6993	0.0025511	0.918829	0.704468	4.91127	5.94705e-05	1.50359	0.0302629
1376302_at	AA955175	Coilin	Coil	0.447459	0.026509	0.316323	0.00655847	0.904343	0.0635088	0.325484	0.0197453
1393523_at	AI059075	Coilin	Coil	1.70219	0.143807	1.15818	0.709407	0.510546	0.433468	1.80209	0.357545
1393623_at	AI502247	Coilin	Coil	0.925507	0.57542	0.415752	5.01613e-05	0.717991	0.425027	0.438498	4.87381e-05
1385904_at	BG153342	cold inducible RNA binding protein	Cirbp	0.379409	0.0014227	0.223009	0.00533329	0.42297	0.00443555	0.197414	0.0238388
1369083_at	NM_031147	cold inducible RNA binding protein	Cirbp	1.00172	0.976154	1.00281	0.461925	1.08093	0.545698	0.994867	0.996374
1370376_a_at	AA866458	cold shock domain protein A	Csda	0.594865	0.022229	2.44359	0.00937002	0.513428	0.00465321	1.96597	0.0508682
1387899_at	U52102	collapsin response mediator protein 1	Crmp1	1.36341	0.134255	0.892363	0.241586	0.952381	0.382794	0.615594	0.0489493
1379631_at	AI071665	colony stimulating factor 1 (macrophage)	Csf1	12.6923	0.00267472	3.31637	0.0869974	4.15314	0.0626326	1.32795	0.22367
1380582_at	AW535553	colony stimulating factor 1 (macrophage)	Csf1	1.00396	0.892701	0.999269	0.996779	1.00165	0.979376	1.00061	0.998917
1372801_at	AI171256	COMM domain containing 10	Commd10	0.554397	0.292917	1.31178	0.0619618	0.492721	0.0638946	1.35846	0.0765977
1372148_at	BI281210	COMM domain containing 2 (predicted)	Commd2_predicted	0.584034	0.131186	1.12224	0.0174988	0.51582	0.0604317	1.08156	0.140639
1398894_at	AI178763	COMM domain containing 3	Commd3	0.936627	0.791258	1.45957	0.0147572	1.23729	0.297251	1.50944	0.00320058
1372304_at	BG378042	COMM domain containing 4 (predicted)	Commd4_predicted	0.488923	0.0419679	1.1198	0.60374	0.813443	0.193133	0.930828	0.321751
1370327_at	AF290194	COMM domain containing 5	Commd5	0.924194	0.813967	1.20015	0.111799	0.793619	0.321784	1.07521	0.737806
1376493_at	AI408996	COMM domain containing 7	Commd7	0.835175	0.509169	1.22929	0.628952	0.747878	0.0388706	0.962143	0.223502
1373294_at	AI234292	COMM domain containing 8 (predicted)	Commd8_predicted	1.27387	0.488054	1.38987	0.0101394	1.20027	0.604561	1.23147	0.02836
1398334_a_at	BF417278	COMM domain containing 9	Commd9	0.82758	0.956806	1.43122	0.0133345	0.696472	0.0279865	1.28702	0.240591
1367968_at	NM_133622	common salivary protein 1	LOC171161	1.00676	0.99332	0.897059	0.496442	1.07118	0.863887	1.00736	0.515862
1398784_at	NM_019259	complement component 1, q subcomponent binding protein	C1qbp	0.701683	0.724226	2.54906	0.00184229	0.613749	0.0215959	2.05961	0.0031082
1376652_at	BF418957	complement component 1, q subcomponent, alpha polypeptide	C1qa	0.670488	0.0344187	0.561068	0.0524098	0.544782	0.0741201	0.797805	0.383282
1383241_at	BI292425	complement component 1, r subcomponent	C1r	126.901	3.05405e-05	146.089	2.80047e-05	129.915	7.06678e-05	153.914	7.18617e-05
1387893_at	D88250	complement component 1, s subcomponent /// similar to complement component 1, s subcomponent (predicted)	C1s /// RGD1561715_predicted	35.7926	0.00630329	34.4742	1.48913e-05	51.4905	0.00578731	59.1531	0.000513088
1383391_a_at	AI716125	complement component 2	C2	2.56083	0.187788	1.04446	0.0586119	3.79443	0.120492	4.22815	0.0450021
1368000_at	NM_016994	complement component 3	C3	46.8691	0.00107713	96.7777	5.20095e-05	11.8045	0.00776606	15.8363	0.00410007
1369764_at	NM_012516	complement component 4 binding protein, alpha	C4bpa	9.63242	0.00186221	43.1783	2.80779e-05	6.1204	0.00685551	7.86627	0.0213619
1368695_at	NM_016995	complement component 4 binding protein, beta	C4bpb	17.7156	0.0147966	15.0799	0.000768441	10.1899	0.00159373	1.32534	0.243324
1393123_at	BM392153	complement component 8, gamma polypeptide (predicted)	C8g_predicted	0.704227	0.262585	0.398206	0.0126777	1.10765	0.656763	0.606328	0.0827987
1368741_at	NM_057146	complement component 9	C9	1.96612	0.0602295	3.89387	0.027729	1.21533	0.304898	1.00794	0.97082
1389470_at	AI639117	complement factor B	Cfb	6.62136	0.06395	25.8515	9.37509e-05	28.5337	9.04494e-05	58.3575	0.00160606
1387798_a_at	D42115	complement receptor related protein	Crry	1.96861	0.123287	0.873463	0.227442	1.80804	0.0988785	1.09966	0.127208
1394096_at	AI555027	complement receptor related protein	Crry	2.61789	0.860381	1.30678	0.0161976	2.33505	0.200776	1.57612	0.0517237
1385238_at	AA926087	Complexin 4 (predicted)	Cplx4_predicted	0.600012	0.159438	0.621111	0.0141091	0.671201	0.171437	0.617519	0.0153551
1374301_at	BI294695	component of oligomeric golgi complex 1 (predicted)	Cog1_predicted	0.535941	0.411413	0.663758	0.0107076	0.667529	0.0219567	0.695603	0.159332
1383206_at	AA955098	component of oligomeric golgi complex 3	Cog3	0.983033	0.683863	1.17149	0.00122252	1.16535	0.288228	1.02709	0.238548
1396663_at	BI300284	Component of oligomeric golgi complex 4 (predicted)	Cog4_predicted	1.41288	0.231383	1.62258	0.229039	1.15074	0.86153	0.944478	0.79756
1372819_at	BM382870	component of oligomeric golgi complex 4 (predicted)	Cog4_predicted	0.903345	0.817687	1.00234	0.768112	0.919555	0.353954	0.892513	0.708764
1398471_at	BF288063	component of oligomeric golgi complex 6	Cog6	0.463834	0.040605	0.610491	0.00199929	0.508011	0.131967	0.737457	0.0193075
1379876_at	AI407943	component of oligomeric golgi complex 7	Cog7	0.590468	0.522077	0.600863	0.00238266	0.563054	0.0685223	0.493698	0.128372
1374045_at	AI598851	Component of oligomeric golgi complex 8 (predicted)	Cog8_predicted	0.445135	0.00862283	0.298839	0.0180908	0.654891	0.23918	0.454323	0.00998095
1390794_at	BI289098	component of oligomeric golgi complex 8 (predicted)	Cog8_predicted	0.351773	0.12189	0.426481	0.00187613	0.28026	0.010995	0.430812	0.0203439
1395117_at	BE106475	congenital dyserythropoietic anemia, type I (predicted)	Cdan1_predicted	0.99983	0.938782	0.994303	0.972202	0.982597	0.878018	0.999923	0.99832
1393740_at	BI294230	connector enhancer of kinase suppressor of Ras 1	Cnksr1	3.10445	0.00661162	3.70449	0.00193351	7.16311	0.00110383	7.41605	0.00132882
1391455_at	AI228280	conserved nuclear protein Nhn1	Nhn1	0.99554	0.301787	0.946819	0.25621	0.783198	0.267177	0.502323	0.0714578
1369351_at	NM_019329	contactin 3	Cntn3	0.917646	0.791679	1.27569	0.205548	0.930622	0.46713	1.35926	0.587138
1373029_at	AI169377	COP9 (constitutive photomorphogenic) homolog, subunit 2 (Arabidopsis thaliana)	Cops2	0.976596	0.927621	1.68276	0.00325423	0.820023	0.033488	1.59251	0.0627119
1398972_at	AW916366	COP9 (constitutive photomorphogenic) homolog, subunit 3 (Arabidopsis thaliana)	Cops3	0.612096	0.0683108	0.614738	0.00403863	0.648542	0.00974674	0.727212	0.0123578
1395352_at	BF282468	COP9 (constitutive photomorphogenic) homolog, subunit 3 (Arabidopsis thaliana)	Cops3	0.913422	0.993463	0.556985	0.0726771	0.761624	0.0893046	0.740868	0.0506937
1371476_at	AI411531	COP9 (constitutive photomorphogenic) homolog, subunit 4 (Arabidopsis thaliana)	Cops4	0.932041	0.123042	1.44816	0.0247021	0.926051	0.300775	1.32281	0.026673
1395565_at	BG669198	COP9 (constitutive photomorphogenic) homolog, subunit 4 (Arabidopsis thaliana)	Cops4	0.654923	0.829579	1.39216	0.145565	0.899597	0.767508	0.897635	0.331274
1395618_at	BG673431	COP9 (constitutive photomorphogenic) homolog, subunit 4 (Arabidopsis thaliana)	Cops4	0.791384	0.882771	1.36461	0.10899	0.71126	0.269274	1.0223	0.938206
1372209_at	AI105072	COP9 (constitutive photomorphogenic) homolog, subunit 5 (Arabidopsis thaliana)	Cops5	0.706245	0.581867	1.34995	0.067408	0.522004	0.0232828	1.09759	0.163643
1399011_at	AI409481	COP9 (constitutive photomorphogenic) homolog, subunit 6 (Arabidopsis thaliana) (predicted)	Cops6_predicted	0.85522	0.621255	0.965549	0.368609	0.961192	0.208791	0.874282	0.583995
1374460_at	BM386508	COP9 (constitutive photomorphogenic) homolog, subunit 7a (Arabidopsis thaliana) (predicted)	Cops7a_predicted	0.750867	0.310216	2.72154	0.101292	0.580547	0.0379841	2.84344	0.147244
1389897_at	BE110772	COP9 (constitutive photomorphogenic) homolog, subunit 7a (Arabidopsis thaliana) (predicted)	Cops7a_predicted	0.99805	0.983371	1.64462	0.133601	0.998369	0.965321	0.998638	0.99406
1398955_at	BG378922	COP9 (constitutive photomorphogenic) homolog, subunit 8 (Arabidopsis thaliana)	Cops8	0.834164	0.405925	1.79989	0.00746758	0.842135	0.0913309	1.36713	0.00479822
1378519_at	BF398120	Copine I (predicted)	Cpne1_predicted	0.656945	0.599335	0.992586	0.971198	0.526344	0.201101	0.999266	0.991912
1392984_at	BG671686	copine III (predicted)	Cpne3_predicted	1.18002	0.238482	2.14675	0.383645	2.63255	0.100994	1.89744	0.637716
1371993_at	AI237636	Copine III (predicted)	Cpne3_predicted	1.78176	0.246583	0.695184	0.00377104	2.59984	0.00368368	0.990937	0.573184
1387038_at	NM_053425	copper chaperone for superoxide dismutase	Ccs	0.348237	0.0800479	0.756481	0.0506124	0.254003	0.00264704	0.718439	0.0645493
1377998_at	BI288705	coproporphyrinogen oxidase	Cpox	0.774943	0.301092	0.825915	0.182835	0.711917	0.029537	1.18631	0.112958
1387446_at	NM_022950	core 1 UDP-galactose:N-acetylgalactosamine-alpha-R beta 1,3-galactosyltransferase	C1galt1	1.28755	0.0478162	5.44673	0.000386077	1.29344	0.00426046	2.13729	0.000930117
1399033_at	AA945869	core binding factor beta	Cbfb	0.587248	0.45006	0.387086	0.0121419	0.888727	0.460304	0.475444	9.78535e-05
1395821_at	BF524120	core binding factor beta	Cbfb	1.03347	0.993546	0.945764	0.200006	0.70447	0.555273	0.758385	0.026451
1390762_at	BE103006	core-binding factor, runt domain, alpha subunit 2; translocated to, 2 (predicted)	Cbfa2t2_predicted	1.0239	0.433926	2.10958	0.06404	1.02222	0.653226	1.37373	0.10975
1379674_at	BE115481	core-binding factor, runt domain, alpha subunit 2; translocated to, 3 (predicted)	Cbfa2t3_predicted	0.7404	0.0339495	0.573647	0.00367304	0.553396	0.0351972	0.506902	0.022795
1388682_at	AI598397	cornichon homolog (Drosophila) (predicted)	Cnih_predicted	0.510955	0.115983	0.583669	0.00165001	0.520637	0.0057266	0.619919	0.0245928
1373747_at	BG381691	cornichon homolog 2 (Drosophila)	Cnih2	1.12445	0.692149	1.45071	0.157096	3.232	0.0343048	2.66406	0.0187369
1388151_at	AI008369	coronin 7	Coro7	1.00351	0.998928	0.943834	0.99206	0.878253	0.344634	1.00176	0.992619
1379656_a_at	AW529016	coronin, actin binding protein 2A	Coro2a	1.3105	0.961902	1.91992	0.0574795	0.912391	0.578689	1.18828	0.297867
1370390_at	AF140359	coronin, actin binding protein 6	Coro6	0.997439	0.877409	0.851127	0.351204	1.10037	0.192814	0.638444	0.368716
1398769_at	NM_019222	coronin, actin-binding protein, 1B	Coro1b	1.20441	0.500039	1.4344	0.025997	0.932205	0.34162	1.27206	0.0827254
1370123_a_at	AF054618	cortactin	Cttn	1.19574	0.334288	2.25013	0.0227058	1.23198	0.103439	1.86799	0.0762013
1371465_at	BM390681	cortactin	Cttn	0.711537	0.547996	0.501487	0.00577209	0.6644	0.0358276	0.584355	0.00802075
1397902_at	BF548780	COX15 homolog, cytochrome c oxidase assembly protein (yeast)	Cox15	1.35046	0.50954	0.678305	0.0776361	1.22451	0.221958	0.670332	0.212494
1375922_at	BI296988	COX15 homolog, cytochrome c oxidase assembly protein (yeast)	Cox15	0.940893	0.919324	0.720444	0.00826327	0.920426	0.613763	0.792712	0.0153245
1371658_at	BM389065	COX4 neighbor	Cox4nb	0.699914	0.901851	1.2151	0.0151435	0.399148	0.0629393	1.02532	0.535501
1374273_at	BG665433	Coxsackie virus and adenovirus receptor	Cxadr	0.471247	0.00614072	0.360368	0.00157118	0.639081	0.0586299	0.448193	0.0179281
1384816_at	AI137518	coxsackie virus and adenovirus receptor	Cxadr	0.72872	0.359613	0.738546	0.0491772	1.02773	0.724945	0.905627	0.292809
1370264_at	BI288556	CPG2 protein	CPG2	0.689213	0.15578	0.261778	0.00656792	0.872496	0.483653	0.485352	0.0065855
1378886_x_at	BE102928	CPG2 protein	CPG2	0.97094	0.864875	0.743811	0.0544084	1.02185	0.982611	0.80114	0.0525161
1398263_at	NM_019355	CPG2 protein	CPG2	1.31327	0.987997	1.54199	0.451786	1.0064	0.924762	1.6444	0.172612
1384718_at	AI030198	Craniofacial development protein 1	Cfdp1	1.71581	0.00782029	1.94912	0.0257389	1.73067	0.181299	1.29474	0.0467968
1373824_at	AW433973	craniofacial development protein 1	Cfdp1	1.48882	0.332747	1.85085	0.0156055	2.12645	0.0252677	1.61745	0.0759398
1395825_at	BF284859	Craniofacial development protein 1	Cfdp1	0.843188	0.968951	1.90506	0.736012	0.816695	0.488774	1.23397	0.835104
1387830_at	NM_017096	C-reactive protein, pentraxin-related	Crp	1.00105	0.544627	0.455778	0.0455705	1.00298	0.642963	0.456668	0.0455565
1367740_at	M14400	creatine kinase, brain	Ckb	0.194565	0.0445529	0.123209	0.000643239	0.146358	0.0130313	0.0902567	0.00621067
1390566_a_at	BI301453	creatine kinase, mitochondrial 1, ubiquitous	Ckmt1	6.59516	0.000684757	6.07152	0.00242811	5.45907	0.00460556	3.81593	0.00327781
1373828_at	AI412614	CREB regulated transcription coactivator 2	Crtc2	2.33306	0.0203948	2.12243	0.00463801	2.21666	0.0300193	1.4895	0.155685
1387300_at	NM_053797	Crn, crooked neck-like 1 (Drosophila)	Crnkl1	1.49589	0.121401	0.811905	0.152147	1.52686	0.194868	0.998568	0.992433
1383648_x_at	BI283883	crumbs homolog 3 (Drosophila)	Crb3	2.2516	0.000710636	1.84744	0.00610536	1.95884	0.0036087	1.6358	0.0024219
1383647_a_at	BI283883	crumbs homolog 3 (Drosophila)	Crb3	1.82981	0.0379747	2.03101	0.015753	1.94396	0.00270732	1.6107	0.000751353
1384397_x_at	AI072527	crumbs homolog 3 (Drosophila)	Crb3	1.73141	0.0847486	1.61883	0.132309	1.00688	0.532988	1.63056	0.154144
1392640_at	AI412155	cryptochrome 1 (photolyase-like)	Cry1	1.83009	0.116608	2.38339	0.0158967	1.26526	0.782587	2.41103	0.0375114
1388385_at	BG371710	crystallin, beta A2	Cryba2	0.358081	0.0116274	0.208704	0.00112174	0.344619	0.0016486	0.282794	0.007695
1382349_at	AI408238	crystallin, gamma S	Crygs	0.572712	0.174168	0.748654	0.764602	0.854841	0.426898	0.773889	0.685666
1376051_at	BI293393	crystallin, lamda 1	Cryl1	0.75846	0.062245	0.610309	0.0110853	0.740047	0.0613889	0.528082	0.0142497
1374628_at	AI232098	crystallin, zeta	Cryz	1.09026	0.729365	0.994274	0.970242	1.00158	0.963351	1.02458	0.808115
1392506_at	AI575645	crystallin, zeta (quinone reductase)-like 1	Cryzl1	0.545754	0.00288212	0.788448	0.170555	0.823234	0.258459	0.85367	0.0524768
1371592_at	AI600236	c-src tyrosine kinase	Csk	1.16988	0.0905862	1.02573	0.90552	0.728392	0.0439177	0.764271	0.127814
1390535_at	BE098745	CTD (carboxy-terminal domain, RNA polymerase II, polypeptide A) phosphatase, subunit 1 (predicted)	Ctdp1_predicted	1.62009	0.0940155	2.55269	0.000586968	1.21994	0.840684	1.67443	0.0426372
1388533_at	BM390302	CTD (carboxy-terminal domain, RNA polymerase II, polypeptide A) small phosphatase 1	Ctdsp1	0.616081	0.446196	0.606677	0.0045485	0.49746	0.0102274	0.515073	0.00368061
1391635_at	AI044500	CTD (carboxy-terminal domain, RNA polymerase II, polypeptide A) small phosphatase-like (predicted)	Ctdspl_predicted	0.971634	0.936645	0.622943	0.0447437	0.65902	0.344862	0.764469	0.281371
1387978_at	U49057	CTD-binding SR-like protein rA9	LOC245925	0.675276	0.0209906	0.76346	0.0860601	0.69815	0.167439	0.998378	0.99331
1397102_at	AI502196	CTD-binding SR-like protein rA9	LOC245925	1.10909	0.423576	1.23033	0.0565848	1.47869	0.379957	0.954133	0.0894966
1367984_at	NM_019384	CTD-binding SR-like rA1	LOC56081	0.847427	0.111946	0.731246	0.600211	0.736529	0.00862428	1.03623	0.704357
1370029_at	NM_019201	C-terminal binding protein 1	Ctbp1	0.948949	0.517132	1.12343	0.412329	0.865049	0.425912	1.00814	0.927398
1387113_at	NM_053335	C-terminal binding protein 2	Ctbp2	2.36984	0.00678537	1.54026	0.0664282	2.39832	0.0059715	1.34264	0.611872
1392299_at	BE113875	C-terminal PDZ domain ligand of neuronal nitric oxide synthase	Capon	2.15212	0.162497	0.861011	0.035302	1.15235	0.881943	0.907805	0.0544191
1379450_at	BM383195	CTTNBP2 N-terminal like (predicted)	Cttnbp2nl_predicted	7.38079	0.00732121	1.94014	0.0449598	13.9204	9.52987e-05	5.80082	0.0221819
1382873_at	BF414250	CTTNBP2 N-terminal like (predicted)	Cttnbp2nl_predicted	1.19148	0.5206	1.64114	0.118472	2.13054	0.104484	2.95266	0.0611751
1390782_at	BI295930	C-type lectin domain family 14, member a	Clec14a	1.01559	0.362296	0.964742	0.296545	0.940122	0.791622	1.00946	0.977728
1376368_at	BE095878	CUE domain containing 2 (predicted)	Cuedc2_predicted	0.568842	0.047836	0.996104	0.759874	0.563518	0.0317815	0.974987	0.95938
1393029_at	BF410771	CUG triplet repeat, RNA binding protein 1	Cugbp1	1.15079	0.110852	0.95116	0.903707	0.978322	0.618354	0.959616	0.337682
1393568_at	BF404793	CUG triplet repeat, RNA binding protein 1	Cugbp1	1.08606	0.383031	1.37244	0.028646	1.24984	0.145874	1.0626	0.332553
1388704_at	AA892394	CUG triplet repeat, RNA binding protein 1	Cugbp1	1.02357	0.604174	0.516279	0.0128119	0.857929	0.309839	0.681659	0.15131
1393257_at	BI293905	CUG triplet repeat, RNA binding protein 1	Cugbp1	0.934228	0.825348	1.12505	0.157865	0.886757	0.416361	1.17092	0.337744
1371900_at	BF408840	CUG triplet repeat, RNA binding protein 1	Cugbp1	1.13775	0.962592	0.571489	0.0487425	0.967773	0.402004	0.66632	0.110642
1397217_at	BF408757	CUG triplet repeat, RNA binding protein 2	Cugbp2	1.56403	0.150968	1.28857	0.255532	1.64746	0.143936	1.29805	0.245549
1397673_at	AW523660	CUG triplet repeat, RNA binding protein 2	Cugbp2	1.01449	0.565823	0.796626	0.0801768	1.72471	0.0495544	1.09914	0.458773
1396654_at	BF403645	CUG triplet repeat, RNA binding protein 2	Cugbp2	0.598517	0.62975	1.74598	0.999911	0.374773	0.438319	1.14714	0.978945
1380670_at	BE095613	CUG triplet repeat, RNA binding protein 2	Cugbp2	1.08895	0.848	0.607807	0.148246	2.84578	0.00393811	0.954164	0.830908
1388195_at	AW140475	CUG triplet repeat, RNA binding protein 2	Cugbp2	1.12164	0.850853	0.743406	0.0614987	1.01714	0.890004	0.860026	0.0869525
1388855_at	BI284428	cullin 1 (predicted)	Cul1_predicted	1.19018	0.18511	1.57136	0.0115689	1.35089	0.0139502	1.60123	0.00717846
1383106_at	BI295890	cullin 2 (predicted)	Cul2_predicted	1.45197	0.0756624	1.33327	0.108474	1.66513	0.0147075	1.3278	0.121329
1378127_at	BF420355	cullin 2 (predicted)	Cul2_predicted	1.64678	0.20963	1.28298	0.964521	1.36559	0.0744208	0.853543	0.362901
1393343_at	BE115856	cullin 3 (predicted)	Cul3_predicted	0.500634	0.00160127	0.598988	0.10693	0.413137	0.0387496	0.81396	0.130015
1399132_at	BI285751	cullin 3 (predicted)	Cul3_predicted	0.651879	0.120895	0.808957	0.0108429	0.704936	0.0676653	0.903729	0.0277194
1369068_at	NM_022683	cullin 5	Cul5	1.16532	0.0443999	1.98343	0.0835046	1.00231	0.519716	1.00458	0.990404
1393306_at	BF551475	Cullin 5	Cul5	1.03607	0.425178	0.766234	0.142755	0.883733	0.755078	0.756258	0.13655
1367972_at	NM_054004	cullin associated and neddylation disassociated 1	Cand1	0.691369	0.151612	1.17832	0.0621582	0.635108	0.00829067	1.18984	0.0781484
1370421_a_at	AB029342	cullin-associated and neddylation-dissociated 2 (putative)	Cand2	0.549974	0.0137301	0.565553	0.0146188	0.50713	0.0504052	0.641361	0.107715
1377406_at	BI275251	Cullin-associated and neddylation-dissociated 2 (putative)	Cand2	0.873822	0.586095	0.660175	0.0114504	0.740488	0.0611337	0.660762	0.0216144
1385024_at	AW535558	cutC copper transporter homolog (E.coli) (predicted)	Cutc_predicted	0.395257	0.0144604	0.79824	0.132419	0.429125	0.0101375	0.729599	0.0926978
1385888_at	AA963272	Cut-like 1 (Drosophila)	Cutl1	1.00461	0.370705	0.619879	0.0315735	1.56053	0.0681072	0.752739	0.00572962
1385887_at	BE107316	Cut-like 1 (Drosophila)	Cutl1	0.94046	0.634416	0.813693	0.298961	1.35853	0.115979	0.777464	0.0107668
1371024_at	AW527515	cut-like 1 (Drosophila)	Cutl1	1.02798	0.868741	1.00182	0.789289	1.00422	0.981193	0.973061	0.214515
1391079_at	BI295875	Cut-like 1 (Drosophila)	Cutl1	0.994885	0.909362	0.956356	0.601868	1.00523	0.969085	0.9542	0.614175
1372138_at	BM390477	Cut-like 1 (Drosophila)	Cutl1	0.91141	0.929777	0.720153	0.635145	1.55248	0.264909	0.848279	0.533202
1395105_at	AW527267	CWF19-like 2, cell cycle control (S. pombe) (predicted)	Cwf19l2_predicted	1.22204	0.139977	1.23893	0.0330414	1.0751	0.233225	1.03842	0.652405
1388875_at	AI410353	CXXC finger 1 (PHD domain)	Cxxc1	1.22977	0.986354	2.29199	0.0127395	0.939337	0.798354	2.23294	0.00116899
1368801_at	NM_053342	CXXC finger 4	Cxxc4	0.415694	0.0081344	0.193252	0.00123161	0.484693	0.011236	0.225767	0.0110666
1394284_at	AW143904	CXXC finger 4	Cxxc4	0.254272	0.0565045	0.371145	0.10606	0.950159	0.544847	1.08916	0.508735
1371629_at	AI105444	CXXC finger 5	Cxxc5	1.28368	0.178095	1.36721	0.168188	1.36167	0.195934	1.13435	0.140428
1375231_a_at	BI281838	CXXC finger 5	Cxxc5	1.00444	0.374699	1.53666	0.0056199	1.38466	0.158142	1.40861	0.0838057
1387897_at	L16532	cyclic nucleotide phosphodiesterase 1	Cnp1	3.56196	0.0756088	1.83805	0.013789	3.60002	0.00270404	2.4956	0.00783813
1370693_a_at	M18630	cyclic nucleotide phosphodiesterase 1	Cnp1	2.52907	0.0908505	1.62882	0.172506	4.33177	0.0536022	1.93388	0.0115164
1389566_at	AW253821	cyclin B2	Ccnb2	0.640027	0.393933	0.65772	0.246133	0.605093	0.169956	0.672722	0.20336
1390343_at	AA998893	Cyclin C	Ccnc	0.610815	0.295071	0.476027	0.000575138	0.590834	0.0428755	0.677848	0.000457199
1375666_at	BE098802	cyclin D binding myb-like transcription factor 1	Dmtf1	1.25218	0.0672625	1.38147	0.00227946	1.28073	0.222362	1.16812	0.0361126
1383075_at	BI295861	cyclin D1	Ccnd1	0.665	0.10762	0.541074	0.0517299	0.7574	0.115962	0.649806	0.0169889
1371643_at	AW143798	cyclin D1	Ccnd1	0.477543	0.118279	0.427612	0.00464622	0.689162	0.162511	0.547727	0.0120292
1371150_at	X75207	cyclin D1	Ccnd1	0.857896	0.982608	1.04809	0.83309	0.830665	0.865736	0.999461	0.782368
1370810_at	L09752	cyclin D2	Ccnd2	1.15068	0.639958	0.637878	0.0685011	1.22329	0.279839	0.53364	0.0668883
1369935_at	NM_012766	cyclin D3	Ccnd3	0.381027	0.0879953	0.619285	0.0192386	0.516218	6.10466e-06	0.615519	0.0210185
1398340_at	AI317832	cyclin D-type binding-protein 1	Ccndbp1	0.588292	0.091565	0.31981	0.00034992	0.666524	0.0244155	0.375015	0.000285844
1391681_at	AI409729	Cyclin E2 (predicted)	Ccne2_predicted	1.35435	0.600171	0.947013	0.958665	1.17012	0.305269	0.689234	0.721723
1367875_at	NM_031030	cyclin G associated kinase	Gak	0.998962	0.983334	1.34172	0.00632032	0.857647	0.136204	1.36457	0.0547344
1367764_at	NM_012923	cyclin G1	Ccng1	0.822443	0.880511	1.36986	0.011863	0.782423	0.860777	1.61143	0.0246969
1371953_at	AI408309	Cyclin G2 (predicted)	Ccng2_predicted	4.58898	0.0121519	2.44791	0.0027088	4.50798	0.00673075	2.53861	0.00420523
1368083_at	NM_052981	cyclin H	Ccnh	0.922057	0.752271	1.48037	0.0885841	1.03573	0.322862	1.28883	0.119497
1388370_at	AA945706	cyclin I (predicted)	Ccni_predicted	0.93177	0.146266	0.741145	7.9406e-05	1.0489	0.917442	0.87703	0.0145026
1392937_at	BF557327	cyclin I (predicted)	Ccni_predicted	0.91132	0.869933	0.628009	0.357592	0.908365	0.564143	0.81571	0.429968
1368050_at	NM_053662	cyclin L1	Ccnl1	1.61134	0.0291442	2.75689	0.00378499	1.95526	0.00472805	1.79799	0.0114342
1382164_at	AI236548	Cyclin L2	Ccnl2	1.04079	0.652423	1.84951	0.12175	1.03042	0.179188	1.46274	0.0918622
1381294_at	BF409260	Cyclin M1 (predicted)	Cnnm1_predicted	1.26948	0.0819833	0.971313	0.908459	0.834699	0.253187	0.74887	0.617378
1376142_at	BE120410	Cyclin M1 (predicted)	Cnnm1_predicted	1.00131	0.988182	0.848685	0.10259	1.06205	0.55627	0.854992	0.107889
1382269_at	BM388183	cyclin M2	Cnnm2	0.519597	0.00250635	1.58594	0.086953	0.779451	0.321203	1.37765	0.0329673
1380970_at	BI281399	Cyclin M2	Cnnm2	1.00324	0.519675	1.16637	0.339225	0.99957	0.995569	0.992369	0.988761
1391270_at	BE112177	Cyclin M3 (predicted)	Cnnm3_predicted	0.371862	0.0122991	0.191902	0.00394363	0.334683	0.000373784	0.373525	0.00567207
1382124_at	BE105042	Cyclin M3 (predicted)	Cnnm3_predicted	0.796831	0.117082	0.706755	0.361717	0.617082	0.0182187	0.860828	0.434159
1369950_at	NM_053593	cyclin-dependent kinase 4	Cdk4	0.712016	0.204493	1.05605	0.553732	0.486119	0.00528167	0.806878	0.0535743
1368088_at	NM_080885	cyclin-dependent kinase 5	Cdk5	0.533885	0.0802372	0.166933	0.0246001	0.263438	0.00952066	0.419177	0.0039673
1397324_at	BE117105	Cyclin-dependent kinase 7 (homolog of Xenopus MO15 cdk-activating kinase)	Cdk7	1.84796	0.108093	1.04286	0.907212	1.70869	0.381265	0.758938	0.330489
1388171_at	AW916118	cyclin-dependent kinase 7 (homolog of Xenopus MO15 cdk-activating kinase)	Cdk7	0.483733	0.117292	0.93047	0.566846	0.606364	0.00999455	1.17144	0.580153
1372759_at	H31766	cyclin-dependent kinase 9 (CDC2-related kinase)	Cdk9	0.921942	0.693645	1.62702	0.00550446	0.875471	0.553378	1.25437	0.04504
1388674_at	AI010427	cyclin-dependent kinase inhibitor 1A	Cdkn1a	2.98904	0.0367976	20.3091	0.00194578	3.69841	0.00413797	21.0627	0.00105184
1373812_at	BE110915	cyclin-dependent kinase inhibitor 1B	Cdkn1b	1.14386	0.103225	0.796904	0.00651936	1.29786	0.239463	0.765342	0.0300843
1369192_at	NM_031762	cyclin-dependent kinase inhibitor 1B	Cdkn1b	0.890565	0.553311	0.878611	0.293144	0.846218	0.597356	0.661078	0.187483
1372299_at	AI013919	cyclin-dependent kinase inhibitor 1C (P57)	Cdkn1c	1.1293	0.630513	1.56913	0.104372	1.03637	0.884291	1.0689	0.771171
1370054_at	NM_131902	cyclin-dependent kinase inhibitor 2C (p18, inhibits CDK4)	Cdkn2c	0.577871	0.0279749	0.32459	0.00322804	0.491111	0.00983771	0.449469	0.0184917
1370226_at	AI409867	cystatin B	Cstb	1.16029	0.331858	1.79003	0.0395701	0.738664	0.514062	1.92981	0.00284754
1370855_at	BG666933	cystatin C	Cst3	0.876162	0.921299	0.626626	0.016528	0.858484	0.376791	0.712394	0.00803335
1368162_at	NM_133566	cystatin E/M	Cst6	0.795994	0.86983	0.805464	0.0733153	0.644327	0.103228	0.56692	0.249465
1370057_at	NM_017148	cysteine and glycine-rich protein 1	Csrp1	1.82905	0.494309	4.10294	0.0220091	1.49922	0.260855	2.37064	0.0435779
1370282_at	U44948	cysteine and glycine-rich protein 2	Csrp2	0.17774	0.0472552	0.0935169	0.00397914	0.123838	0.00146882	0.120813	0.0233179
1376797_at	AA997458	cysteine and glycine-rich protein 2 binding protein (predicted)	Csrp2bp_predicted	0.675133	0.236886	1.83189	0.0394651	0.775554	0.900176	1.80457	0.0281729
1377738_a_at	AI176855	cysteine and histidine rich 1	Cyhr1	0.650581	0.130567	0.305118	0.0126929	0.719948	0.187061	0.465052	0.0478117
1383160_at	AA892238	cysteine and histidine-rich domain (CHORD)-containing, zinc-binding protein 1 (predicted)	Chordc1_predicted	1.06986	0.669714	1.86641	0.0235769	1.03297	0.305619	1.83598	0.0226748
1367755_at	NM_052809	cysteine dioxygenase 1, cytosolic	Cdo1	0.126029	0.00291753	0.337684	0.00199241	0.120224	0.0128583	0.312819	0.00134324
1368290_at	NM_031327	cysteine rich protein 61	Cyr61	1.00354	0.995796	0.986735	0.970391	1.00474	0.995693	0.995431	0.989191
1398286_at	M64755	cysteine sulfinic acid decarboxylase	Csad	1.77437	0.967173	0.877204	0.991434	0.999905	0.999746	0.810531	0.892431
1382037_at	AI600057	cysteine-rich motor neuron 1 (predicted)	Crim1_predicted	1.03734	0.551224	1.53063	0.0449619	1.20413	0.220429	1.28959	0.141807
1368633_at	NM_022859	cysteine-rich secretory protein 1	Crisp1	1.84436	0.028357	1.01024	0.965462	1.09011	0.661676	0.969828	0.948584
1388594_at	BG371453	cysteine-rich with EGF-like domains 1	Creld1	0.430425	0.00836953	0.940383	0.197382	0.541421	0.0203395	0.806986	0.0303908
1377016_at	BE106888	cysteine-rich with EGF-like domains 2	Creld2	0.873579	0.92697	2.14027	0.0486585	1.30587	0.11189	1.989	0.0502651
1374034_at	BG379410	cysteinyl-tRNA synthetase (predicted)	Cars_predicted	1.19225	0.12289	1.10408	0.884575	1.35597	0.178016	0.740624	0.877609
1376754_at	AI176610	cysteinyl-tRNA synthetase (predicted)	Cars_predicted	1.39182	0.485262	1.35043	0.0527705	1.46434	0.30081	1.28385	0.554295
1394970_at	BI279660	cysteinyl-tRNA synthetase (predicted)	Cars_predicted	1.10429	0.637519	1.00492	0.727386	1.12396	0.197409	0.955512	0.772151
1391572_at	BE109168	cysteinyl-tRNA synthetase (predicted)	Cars_predicted	1.00557	0.968238	0.877824	0.818013	0.998885	0.232012	0.861467	0.626172
1390692_at	BE105721	cytidine 5'-triphosphate synthase (predicted)	Ctps_predicted	0.699931	0.200997	1.45838	0.0361641	0.429611	0.00440086	1.29451	0.0551604
1394431_at	AI704014	cytidine and dCMP deaminase domain containing 1	Cdadc1	1.00757	0.242775	0.588683	0.00387336	0.850605	0.874838	0.66104	0.00380732
1385329_at	BF401322	cytidine and dCMP deaminase domain containing 1	Cdadc1	1.00991	0.726526	0.600679	0.0523174	1.3177	0.0540431	1.10764	0.422175
1371804_at	AI172266	cytidine and dCMP deaminase domain containing 1	Cdadc1	0.897331	0.953875	1.97031	0.0115063	1.09105	0.758953	1.99513	0.0271839
1373650_at	AI172078	cytidine monophospho-N-acetylneuraminic acid synthetase	Cmas	0.518237	0.0809492	0.754231	0.00064056	0.410961	0.0114117	0.643378	0.0216011
1389135_at	AW140637	cytidine triphosphate synthase II	Ctps2	1.18531	0.751804	1.61515	0.00800053	1.07105	0.336765	2.31971	0.0108343
1373365_at	AI100861	cytidylate kinase	Cmpk	1.08651	0.474036	0.804827	0.116703	1.20963	0.922371	0.829968	0.0337388
1372846_at	AI179227	cytochrome b, ascorbate dependent 3	Cybasc3	0.857326	0.490431	0.97107	0.740922	1.61692	0.633668	1.07823	0.12605
1379344_at	AI176057	Cytochrome b-245, beta polypeptide	Cybb	1.82226	0.0230818	5.07998	0.00352892	1.58792	0.0265975	2.52938	0.00928267
1386904_a_at	AF007107	cytochrome b-5	Cyb5	0.374416	0.236488	0.404696	0.0186078	0.466441	0.0308525	0.57508	0.0392625
1370808_at	J03867	cytochrome b5 reductase 3	Cyb5r3	0.228225	0.00680533	0.104691	0.00163241	0.18137	0.0128539	0.0576129	0.016301
1370827_at	AF307840	cytochrome b5 reductase 4	Cyb5r4	1.12976	0.183843	1.6168	0.00136585	1.10477	0.224355	1.55106	0.0180235
1370005_at	NM_030586	cytochrome b5 type B	Cyb5b	0.870065	0.0370971	2.37754	0.124336	0.91925	0.111062	1.52677	0.109601
1398383_at	BI282164	cytochrome b-561 (predicted)	Cyb561_predicted	0.651994	0.297826	0.506752	0.0284638	0.491099	0.0109939	0.535758	0.0470033
1399111_at	AI102191	cytochrome b-561 domain containing 2	Cyb561d2	0.408681	0.111711	0.891913	0.234057	0.458408	0.0164846	0.625169	0.345207
1367607_at	NM_017202	cytochrome c oxidase subunit IV isoform 1	Cox4i1	0.976982	0.887396	1.06962	0.0869647	0.802053	0.0178924	0.834475	0.79759
1386887_at	NM_053586	cytochrome c oxidase subunit Vb	Cox5b	0.797859	0.70149	0.968109	0.343532	0.648312	0.0245582	1.01658	0.428811
1371337_at	BG378939	cytochrome c oxidase subunit VIIa polypeptide 2 like (predicted)	Cox7a2l_predicted	0.985791	0.930698	1.61452	0.0102171	0.803768	0.012601	1.18471	0.119116
1371387_at	AA866477	cytochrome c oxidase subunit VIIb	Cox7b	0.739975	0.715123	0.849403	0.176733	0.961003	0.256172	0.926737	0.246562
1370888_at	X15030	cytochrome c oxidase, subunit Va	Cox5a	0.894734	0.892865	1.37099	0.0613793	0.806801	0.379644	1.30954	0.0336046
1370861_at	BI282326	cytochrome c oxidase, subunit VIa, polypeptide 1	Cox6a1	0.885573	0.984093	0.999029	0.80008	0.6508	0.052698	0.987145	0.963081
1367757_at	NM_019360	cytochrome c oxidase, subunit VIc	Cox6c	0.767905	0.839735	0.905434	0.188925	0.574553	0.0635039	0.781122	0.18974
1367629_at	NM_022503	cytochrome c oxidase, subunit VIIa 2	Cox7a2	0.970027	0.882364	0.783198	0.119042	0.925979	0.44373	0.825999	0.180792
1388113_at	BG673321	cytochrome c oxidase, subunit VIIIa	Cox8a	0.854262	0.683525	0.833822	0.0615387	0.785692	0.143842	0.990308	0.144802
1394658_at	AI176811	Cytochrome c oxidase, subunit XVII assembly protein homolog (yeast)	Cox17	0.884392	0.342934	1.20935	0.880984	1.00452	0.67341	1.01637	0.88012
1369984_at	NM_053540	cytochrome c oxidase, subunit XVII assembly protein homolog (yeast)	Cox17	0.68511	0.616602	1.53517	0.05087	0.69545	0.274329	0.760354	0.394025
1387773_at	NM_012839	cytochrome c, somatic	Cycs	0.850732	0.31527	1.50169	0.0882967	0.989156	0.466277	1.41565	0.0255639
1369939_at	AI104240	cytochrome c, somatic	Cycs	0.900636	0.922308	1.06859	0.0255522	0.94686	0.339131	1.21607	0.0209354
1369321_s_at	NM_012840	cytochrome c, testis /// phosphodiesterase 11A	Cyct /// Pde11a	0.653644	0.72497	1.96298	0.290091	1.92344	0.974538	1.86217	0.857513
1371342_at	BI277021	cytochrome c-1 (predicted)	Cyc1_predicted	0.45007	0.104717	1.22264	0.849869	0.64007	0.0210212	1.06194	0.555953
1387916_at	U39208	cytochrome P450 4F6	Cyp4f6	0.957914	0.56301	0.938156	0.0741336	0.775498	0.369279	0.836922	0.109658
1368990_at	NM_012940	cytochrome P450, family 1, subfamily b, polypeptide 1	Cyp1b1	1.00038	0.994319	0.600464	0.0782708	0.996772	0.956784	0.729403	0.102156
1378551_at	BE118606	cytochrome P450, family 20, subfamily A, polypeptide 1	Cyp20a1	0.981709	0.278469	1.36762	0.00709448	0.883446	0.473078	1.26217	0.0179722
1387583_at	NM_130408	cytochrome P450, family 26, subfamily A, polypeptide 1	Cyp26a1	1.00331	0.995105	0.891837	0.149331	1.8836	0.069703	0.891818	0.589237
1387914_at	M73231	cytochrome P450, family 27, subfamily a, polypeptide 1	Cyp27a1	4.77934	0.0205066	6.50406	0.000267754	36.6404	0.00135728	31.4964	0.00560101
1368636_at	NM_053763	cytochrome P450, family 27, subfamily b, polypeptide 1	Cyp27b1	1.27126	0.313638	0.964686	0.797586	1.6305	0.115666	0.861141	0.498677
1367979_s_at	NM_012941	cytochrome P450, subfamily 51	Cyp51	0.554125	0.0861769	1.03678	0.525963	0.479024	0.107132	0.866276	0.0528546
1387020_at	BG664123	cytochrome P450, subfamily 51	Cyp51	0.486403	0.133529	0.95417	0.636351	0.413115	0.0292551	0.87234	0.069761
1370475_at	M20406	cytochrome P450IIB3	Cyp2b3	0.996209	0.983863	1.00201	0.917178	1.0044	0.180036	1.00462	0.873555
1385334_at	AA818166	Cytochrome P450-like protein	Loc266761	0.650125	0.00214632	0.370649	0.000328162	0.576202	0.035777	0.640399	0.0902388
1388127_at	AI170346	cytochrome P450-like protein	Loc266761	0.772977	0.658342	1.12004	0.70822	0.725708	0.22511	1.74078	0.10321
1372498_at	BF285068	cytokine induced apoptosis inhibitor 1	Ciapin1	0.476821	0.0430635	1.39306	0.040416	0.346125	0.0201935	1.65324	0.00156959
1378586_at	BI291842	Cytokine inducible SH2-containing protein	Cish	2.02881	0.154109	0.970959	0.74706	2.08863	0.140069	1.00096	0.988938
1389294_at	AI103084	cytoplasmic FMR1 interacting protein 1 (predicted)	Cyfip1_predicted	1.55495	0.0427965	1.05494	0.963172	1.36784	0.0567383	0.908064	0.0513212
1379150_at	BF404462	Cytoplasmic FMR1 interacting protein 2 (predicted)	Cyfip2_predicted	0.763104	0.229201	0.95817	0.71156	1.5417	0.180795	1.54932	0.163577
1398533_at	BE105837	cytoplasmic FMR1 interacting protein 2 (predicted)	Cyfip2_predicted	1.03124	0.536935	1.34535	0.320143	0.813238	0.98963	1.37455	0.999892
1368571_at	NM_021997	cytoplasmic linker 2	Cyln2	2.46316	0.0201047	2.61361	0.000447636	3.0405	0.00421606	2.14914	0.00059685
1377589_at	BF386215	Cytoplasmic linker 2	Cyln2	1.6138	0.984218	1.57981	0.03917	1.58922	0.281738	1.28096	0.491622
1375685_at	BI282257	cytoplasmic linker associated protein 1	Clasp1	2.75076	0.00022672	1.02965	0.458426	3.03022	0.000946231	1.09103	0.390785
1384015_at	AI044920	cytoplasmic linker associated protein 1	Clasp1	1.42601	0.208682	2.58054	0.062647	1.36193	0.0410482	1.21255	0.389749
1392996_at	BG668435	cytoplasmic polyadenylation element binding protein 1 (predicted)	Cpeb1_predicted	1.37194	0.388352	1.6379	0.0107114	1.11649	0.431438	1.81895	0.0123823
1390628_at	AI010275	cytoplasmic polyadenylation element binding protein 2 (predicted)	Cpeb2_predicted	1.49849	0.00465895	1.42563	0.052119	1.41858	0.00499475	1.21911	0.0232006
1396225_at	BG666316	cytoplasmic polyadenylation element binding protein 2 (predicted)	Cpeb2_predicted	1.16812	0.336747	1.8723	0.0201713	0.969754	0.765371	2.27166	0.112818
1372223_at	BG374299	cytoplasmic polyadenylation element binding protein 4 (predicted)	Cpeb4_predicted	1.47417	0.00714818	0.731205	0.0360041	1.21608	0.441908	0.745473	0.0354314
1393294_at	BG671389	cytoplasmic polyadenylation element binding protein 4 (predicted)	Cpeb4_predicted	1.80347	0.0470323	2.02901	0.0128851	1.29544	0.538071	1.46033	0.0214459
1388405_at	BI294780	cytoskeleton associated protein 5	Ckap5	1.11655	0.980214	1.11184	0.123442	0.952975	0.829405	1.15198	0.243895
1371885_at	BI282366	cytoskeleton-associated protein 1 (predicted)	Ckap1_predicted	0.927193	0.951985	2.75709	0.00176522	0.671313	0.518579	2.1046	0.00826352
1375654_at	BI278813	cytoskeleton-associated protein 4 (predicted)	Ckap4_predicted	1.51515	0.022478	1.11423	0.772262	0.809628	0.194628	1.5876	0.828654
1375643_at	BM384259	cytoskeleton-associated protein 4 (predicted)	Ckap4_predicted	0.828505	0.452915	0.696701	0.0364625	0.73186	0.712248	0.796496	0.00583219
1384198_at	BF288648	cytosolic ovarian carcinoma antigen 1 (predicted)	Cova1_predicted	0.771084	0.322577	0.712406	0.0981107	1.1185	0.179654	0.77809	0.211729
1397692_at	BE104820	cytotoxic granule-associated RNA binding protein 1	Tia1	1.25052	0.0243082	0.947238	0.657407	1.47838	0.0451823	0.853564	0.542756
1374786_at	BI298817	Cytotoxic granule-associated RNA binding protein 1	Tia1	1.19139	0.740401	0.454012	0.0163122	0.783745	0.224129	0.768299	0.134221
1387874_at	AI230048	D site albumin promoter binding protein	Dbp	1.15955	0.434679	5.77258	0.00955368	1.00594	0.920733	7.0616	0.0145033
1388105_at	BE113021	D123 gene product	D123	0.443394	0.199182	0.65275	0.0155855	0.547028	0.0215941	0.81357	0.0184872
1372166_at	AI169146	D4, zinc and double PHD fingers family 2 (predicted)	Dpf2_predicted	1.29031	0.124045	1.52151	0.0318422	1.64635	0.00292511	1.61668	0.0117363
1399162_a_at	AJ277077	damage-specific DNA binding protein 1	Ddb1	0.333611	0.351135	0.408724	0.00602828	0.534723	0.0100242	0.596355	0.0831775
1383205_at	BI288833	dapper homolog 2, antagonist of beta-catenin (xenopus) (predicted)	Dact2_predicted	1.05798	0.801628	2.21308	0.0130051	0.95695	0.388154	1.15994	0.566322
1373046_at	AW918273	DAZ associated protein 1	Dazap1	1.46238	0.256332	2.82204	0.00306651	1.67674	0.155944	2.40873	0.00911543
1372511_at	AI102612	DAZ associated protein 2	Dazap2	0.844031	0.246584	1.65613	0.104904	1.12339	0.0740727	1.4837	0.154601
1382281_at	BI296136	DAZ associated protein 2	Dazap2	1.0022	0.284401	0.994328	0.659608	0.939615	0.830496	0.744597	0.637619
1367532_at	AA893186	DAZ associated protein 2	Dazap2	0.962115	0.339767	0.924176	0.541347	0.786573	0.830729	1.02379	0.771989
1385369_at	BI290883	DAZ interacting protein 1-like	Dzip1l	3.52078	0.00921797	5.07301	0.022562	3.32018	0.00915641	4.07381	0.0693963
1372999_at	AI171216	DCN1, defective in cullin neddylation 1, domain containing 5 (S. cerevisiae)	Dcun1d5	1.02917	0.675898	0.965366	0.837092	1.05166	0.931527	1.07409	0.180169
1375432_at	AI171599	DD6A4-12(7)-2 mRNA, partial sequence	---	0.981106	0.227929	1.1062	0.906025	1.35689	0.170723	1.12483	0.241367
1394597_at	AI101356	DDHD domain containing 1	Ddhd1	0.783377	0.558136	1.59264	0.612593	1.138	0.740941	1.07603	0.0874936
1392072_at	BE108176	D-dopachrome tautomerase	Ddt	0.788453	0.00392468	0.938997	0.324079	0.815222	0.347269	0.800391	0.0978465
1367793_at	NM_024131	D-dopachrome tautomerase	Ddt	0.484734	0.514239	1.84539	0.111592	0.304048	0.00132217	1.33176	0.0598715
1371837_at	AA851926	ddx5 gene	Ddx5	0.576116	0.00995953	0.334826	2.91642e-05	0.703496	0.0231554	0.42794	0.00241371
1373319_at	BF419628	DEAD (Asp-Glu-Ala-Asp) box polypeptide 1	Ddx1	0.721984	0.20944	1.24572	0.0141503	0.686824	0.00977713	1.23043	0.391579
1397529_at	BI296754	DEAD (Asp-Glu-Ala-Asp) box polypeptide 17	Ddx17	0.813636	0.532381	0.382393	0.00282141	0.727933	0.347843	0.394767	0.00531605
1397405_at	BM385221	DEAD (Asp-Glu-Ala-Asp) box polypeptide 17	Ddx17	0.927378	0.857043	0.23095	0.00258585	0.883164	0.868327	0.237995	0.00222297
1377945_at	AI111512	DEAD (Asp-Glu-Ala-Asp) box polypeptide 18	Ddx18	0.76919	0.00335325	1.51316	0.0262947	0.96479	0.699139	1.25124	0.0651719
1397508_at	BE106682	DEAD (Asp-Glu-Ala-Asp) box polypeptide 18	Ddx18	0.730638	0.0151825	1.34097	0.131649	0.761215	0.427641	1.02866	0.208778
1383559_at	AI144819	DEAD (Asp-Glu-Ala-Asp) box polypeptide 19	Ddx19	1.11231	0.21321	1.57519	0.0715557	0.998698	0.443347	1.02948	0.0852186
1380012_at	BF399592	DEAD (Asp-Glu-Ala-Asp) box polypeptide 19	Ddx19	1.09641	0.599158	1.00565	0.452216	1.00088	0.536184	0.846644	0.350593
1388814_at	AI408110	DEAD (Asp-Glu-Ala-Asp) box polypeptide 19	Ddx19	0.788792	0.625819	0.820551	0.246949	0.42005	0.0460121	0.743178	0.00792519
1388843_at	BI296771	DEAD (Asp-Glu-Ala-Asp) box polypeptide 19	Ddx19	0.782258	0.690554	0.916703	0.681922	0.99867	0.683245	1.03962	0.502468
1375901_at	AI178527	DEAD (Asp-Glu-Ala-Asp) box polypeptide 21a	Ddx21a	0.954844	0.0297159	1.60345	0.0263708	0.850031	0.116379	1.60991	0.0149739
1396187_at	AI136551	DEAD (Asp-Glu-Ala-Asp) box polypeptide 21a	Ddx21a	1.01853	0.739761	1.02288	0.923712	0.556039	0.044596	1.09501	0.104223
1373809_at	BI296325	DEAD (Asp-Glu-Ala-Asp) box polypeptide 21b /// hypothetical protein LOC606294	Ddx21b /// LOC606294	0.643173	0.142834	0.375265	0.0125753	0.486578	0.0388092	0.262538	0.00553426
1376739_at	AW252511	DEAD (Asp-Glu-Ala-Asp) box polypeptide 24	Ddx24	0.80023	0.0379056	1.72175	0.0111706	0.719494	0.288538	1.53812	0.0191248
1376116_at	BM389678	DEAD (Asp-Glu-Ala-Asp) box polypeptide 24	Ddx24	0.887657	0.550112	1.00702	0.593534	0.808324	0.100159	1.10434	0.455039
1368619_at	NM_031630	DEAD (Asp-Glu-Ala-Asp) box polypeptide 25	Ddx25	0.70245	0.0871624	0.412428	0.00774579	0.902007	0.265286	0.310638	0.0106708
1397551_at	BG373974	DEAD (Asp-Glu-Ala-Asp) box polypeptide 27	Ddx27	0.977964	0.446582	1.59092	0.066753	0.898872	0.790411	1.14271	0.485904
1384377_at	BI284877	DEAD (Asp-Glu-Ala-Asp) box polypeptide 28 (predicted)	Ddx28_predicted	0.647593	0.0584242	1.05865	0.0466402	0.483607	0.029732	1.11227	0.402661
1387048_at	NM_053563	DEAD (Asp-Glu-Ala-Asp) box polypeptide 39	Ddx39	0.912138	0.64887	2.96199	0.000398185	0.921105	0.81394	2.39388	0.000782142
1372377_at	BM389310	DEAD (Asp-Glu-Ala-Asp) box polypeptide 41 (predicted)	Ddx41_predicted	0.872116	0.200167	0.686123	0.0278936	0.694156	0.122907	0.775968	0.0349807
1376596_at	BI295847	DEAD (Asp-Glu-Ala-Asp) box polypeptide 42 (predicted)	Ddx42_predicted	1.1229	0.288887	1.04688	0.45075	1.02294	0.7904	1.07302	0.623057
1379896_at	BM390256	DEAD (Asp-Glu-Ala-Asp) box polypeptide 42 (predicted)	Ddx42_predicted	1.25024	0.39611	2.22993	0.00654092	1.21789	0.114068	1.46562	0.0496255
1387912_at	U25746	DEAD (Asp-Glu-Ala-Asp) box polypeptide 46	Ddx46	0.419437	0.0572379	0.341111	0.000161613	0.507611	0.0222644	0.311732	0.0281211
1375554_at	BM390927	DEAD (Asp-Glu-Ala-Asp) box polypeptide 47	Ddx47	0.971505	0.718342	1.44388	0.00785372	0.72153	0.171824	1.19631	0.420703
1374332_at	AI171365	DEAD (Asp-Glu-Ala-Asp) box polypeptide 49 (predicted)	Ddx49_predicted	0.673301	0.353156	2.13875	0.0273459	0.493486	0.0262906	2.40139	0.038926
1390688_at	AA799576	DEAD (Asp-Glu-Ala-Asp) box polypeptide 50	Ddx50	0.930419	0.374244	2.12153	0.000390823	1.26765	0.268658	1.53886	0.0135226
1373682_at	BI290764	DEAD (Asp-Glu-Ala-Asp) box polypeptide 51 (predicted)	Ddx51_predicted	0.774734	0.287127	1.29859	0.471071	0.555265	0.0561121	1.16373	0.939626
1368588_at	NM_053525	DEAD (Asp-Glu-Ala-Asp) box polypeptide 52	Ddx52	1.33679	0.348752	2.25795	0.0549997	3.41878	0.0589616	2.25139	0.0401715
1391889_at	BG671963	DEAD (Asp-Glu-Ala-Asp) box polypeptide 52	Ddx52	1.04889	0.501081	1.40085	0.110925	1.02214	0.932497	1.05014	0.0376884
1378497_at	BF400776	DEAD (Asp-Glu-Ala-Asp) box polypeptide 55 (predicted)	Ddx55_predicted	0.822466	0.0584933	1.08741	0.0878879	0.620056	0.034312	0.876236	0.20286
1383635_at	BM385099	DEAD (Asp-Glu-Ala-Asp) box polypeptide 59	Ddx59	0.4722	0.00881342	0.710431	0.943682	0.579034	0.00339994	1.42448	0.24939
1376468_at	AI411501	dead end homolog 1 (zebrafish)	Dnd1	0.787648	0.617783	1.16283	0.26427	0.610816	0.0605115	1.00109	0.294826
1395533_at	BF552813	dead end homolog 1 (zebrafish)	Dnd1	0.544484	0.991455	0.71009	0.0518244	0.332604	0.0719911	0.204721	0.000441663
1391118_at	BI280337	DEAD/H (Asp-Glu-Ala-Asp/His) box polypeptide 11 (CHL1-like helicase homolog, S. cerevisiae) (predicted)	Ddx11_predicted	0.905807	0.99236	0.998827	0.309428	1.00369	0.985781	1.01036	0.467824
1370979_at	BF282783	DEAD/H (Asp-Glu-Ala-Asp/His) box polypeptide 20, 103kD	Ddx20	1.08773	0.697975	1.18682	0.0538858	1.21378	0.110825	1.36363	0.0241067
1399123_at	BI302415	DEAD/H (Asp-Glu-Ala-Asp/His) box polypeptide 26	Ddx26	1.30986	0.135238	0.610843	0.00209072	0.889366	0.434913	0.554741	0.00522259
1380464_at	AI145031	DEAD/H (Asp-Glu-Ala-Asp/His) box polypeptide 26	Ddx26	0.926075	0.595536	0.992306	0.983785	1.76076	0.514127	0.957627	0.897297
1385482_at	BI293434	DEAD/H (Asp-Glu-Ala-Asp/His) box polypeptide 26	Ddx26	1.1331	0.742968	0.617958	0.276522	1.29565	0.746064	1.55746	0.456384
1372242_at	AI169598	DEAD/H (Asp-Glu-Ala-Asp/His) box polypeptide 3, X-linked	Ddx3x	1.04464	0.491674	0.745553	0.00293786	1.01048	0.192009	0.945816	0.411115
1386535_at	BG667163	DEAD/H (Asp-Glu-Ala-Asp/His) box polypeptide 3, X-linked	Ddx3x	1.06959	0.715652	0.895395	0.0309253	1.47749	0.229019	0.68255	0.0614772
1385214_at	BF391513	DEAD/H (Asp-Glu-Ala-Asp/His) box polypeptide 3, X-linked	Ddx3x	0.880108	0.888105	2.35108	0.012813	1.66284	0.806571	1.41748	0.132513
1374506_at	BI296403	DEAD/H (Asp-Glu-Ala-Asp/His) box polypeptide 31 (predicted)	Ddx31_predicted	0.694009	0.0308964	0.551702	0.0513718	0.479187	0.0228653	0.513361	0.0354823
1374470_at	AI102264	DEAH (Asp-Glu-Ala-Asp/His) box polypeptide 57	Dhx57	1.04347	0.981999	0.566978	0.0308233	1.17844	0.417041	0.721123	0.093275
1398937_at	BI279381	DEAH (Asp-Glu-Ala-His) box polypeptide 15 (predicted)	Dhx15_predicted	0.852215	0.433655	1.26874	0.011491	0.851	0.103727	0.998678	0.240035
1399084_at	BF405883	DEAH (Asp-Glu-Ala-His) box polypeptide 16	Dhx16	0.961656	0.536961	0.969328	0.659255	1.11459	0.402486	0.96886	0.166734
1374858_at	BF420262	DEAH (Asp-Glu-Ala-His) box polypeptide 29 (predicted)	Dhx29_predicted	0.761999	0.00822072	1.05715	0.580845	0.804408	0.389188	1.20502	0.0748383
1388595_at	AI102995	DEAH (Asp-Glu-Ala-His) box polypeptide 30	Dhx30	0.627335	0.0530656	1.02726	0.717958	0.735068	0.048138	1.05095	0.617422
1395579_at	BG666347	DEAH (Asp-Glu-Ala-His) box polypeptide 32 (predicted)	Dhx32_predicted	0.490519	0.305288	0.582802	0.167262	0.217541	0.0639623	0.590248	0.152679
1377763_at	BF283765	DEAH (Asp-Glu-Ala-His) box polypeptide 33 (predicted)	Dhx33_predicted	0.866658	0.873783	0.447239	0.0626617	1.12641	0.725811	0.550553	0.016188
1376437_at	BM383834	DEAH (Asp-Glu-Ala-His) box polypeptide 33 (predicted)	Dhx33_predicted	0.726055	0.902234	1.25899	0.48211	0.869588	0.528762	0.997791	0.414848
1385871_at	AA859982	DEAH (Asp-Glu-Ala-His) box polypeptide 36 (predicted)	Dhx36_predicted	1.48955	0.0623596	1.29581	0.105637	0.774365	0.108688	1.14581	0.0639979
1385872_at	AI237532	DEAH (Asp-Glu-Ala-His) box polypeptide 36 (predicted)	Dhx36_predicted	1.29261	0.0685571	1.43049	0.0101809	0.793136	0.157985	1.18353	0.128424
1377906_at	BF404389	DEAH (Asp-Glu-Ala-His) box polypeptide 36 (predicted)	Dhx36_predicted	0.987289	0.951698	0.99443	0.938135	0.538213	0.980344	0.996501	0.983867
1377785_at	BI275330	DEAH (Asp-Glu-Ala-His) box polypeptide 40	Dhx40	0.565637	0.885308	2.01138	0.000968306	0.70282	0.475495	1.60197	0.0286839
1374299_at	BF398414	DEAH (Asp-Glu-Ala-His) box polypeptide 9 (predicted)	Dhx9_predicted	0.704227	0.0508927	0.609762	0.0196248	0.776897	0.855354	0.575164	0.00597703
1389535_at	BI285645	death associated protein 3	Dap3	0.989489	0.399959	1.00649	0.956872	1.10909	0.30598	0.970955	0.684001
1376788_at	AA818353	death associated protein kinase 1 (predicted)	Dapk1_predicted	1.42696	0.162894	1.58794	0.000932792	1.58455	0.0882314	1.90558	0.00149562
1379911_at	BI281823	death associated protein kinase 1 (predicted)	Dapk1_predicted	1.00324	0.964937	1.00245	0.787176	0.958675	0.612221	1.40776	0.694313
1398434_at	BE107465	Death associated transcription factor 1 (predicted)	Datf1_predicted	1.45714	0.124118	0.85991	0.108622	1.47109	0.0984144	0.991762	0.491059
1393698_at	BE106785	Death associated transcription factor 1 (predicted)	Datf1_predicted	1.16517	0.63203	0.994922	0.98169	1.00061	0.313715	1.00349	0.623113
1382326_at	AI555347	Death effector domain-containing	Dedd	1.32272	0.0333517	1.05048	0.981454	1.44687	0.0874336	1.03372	0.310184
1369941_at	NM_022526	death-associated protein	Dap	1.37963	0.218336	1.60388	0.0206779	0.967092	0.364448	1.28627	0.80816
1392216_at	BF403731	Death-associated protein kinase 3	Dapk3	1.71574	0.235386	5.89608	0.030668	1.47237	0.338821	3.196	0.00910328
1367621_at	NM_022546	death-associated protein kinase 3	Dapk3	0.999493	0.935914	1.24182	0.32585	1.00067	0.700938	0.998703	0.872822
1390185_at	BE109709	decapping enzyme, scavenger	Dcps	0.792846	0.547738	2.04686	0.223413	1.46907	0.217955	1.43729	0.490307
1387951_at	AB032395	decay accelarating factor 1	Daf1	2.37725	0.109384	2.84596	0.00971932	1.79296	0.690938	2.56993	0.0174704
1380352_at	AA956439	Dedicator of cyto-kinesis 1 (predicted)	Dock1_predicted	1.24427	0.714562	1.14903	0.773768	0.965367	0.0907829	1.00299	0.635635
1384525_at	AI549335	dedicator of cytokinesis 11	Dock11	1.74083	0.058951	0.716945	0.0458754	1.41592	0.627397	0.911137	0.969106
1370905_at	BI291229	dedicator of cytokinesis 9	Dock9	0.751664	0.355915	0.97156	0.822234	1.17124	0.247802	1.31704	0.0218035
1367465_at	AI013627	defender against cell death 1	Dad1	0.731542	0.243208	0.870291	0.111756	0.705219	0.0141923	0.818573	0.0255985
1369660_at	AF068860	defensin beta 1	Defb1	3.20365	0.0428717	1.91405	0.0488061	1.75218	0.114604	1.10128	0.951122
1386988_at	NM_031801	deformed epidermal autoregulatory factor 1 (Drosophila)	Deaf1	0.647234	0.0141619	0.275258	0.011524	0.653439	0.536379	0.473833	0.0042127
1367770_at	NM_053323	degenerative spermatocyte homolog 1 (Drosophila)	Degs1	0.604968	0.993752	0.796426	0.13421	0.681671	0.0965396	0.974718	0.441703
1388687_at	BI274588	dehydrodolichyl diphosphate synthase	Dhdds	0.420107	0.224502	0.742601	0.181842	0.329435	0.0146521	0.625504	0.183311
1390172_at	AI409946	dehydrogenase E1 and transketolase domain containing 1	Dhtkd1	0.382615	0.0286121	0.446186	0.00439777	0.712562	0.691351	0.537724	0.0159546
1389407_at	BE099453	dehydrogenase/reductase (SDR family) member 1	Dhrs1	0.294507	0.000398126	0.25128	0.00328894	0.39303	0.0161488	0.299306	0.0267368
1391259_at	BE104618	Dehydrogenase/reductase (SDR family) member 1	Dhrs1	0.340335	0.00569455	0.461811	0.00447054	0.270565	0.00340119	0.321748	0.013058
1373240_at	BI276935	dehydrogenase/reductase (SDR family) member 3	Dhrs3	0.861599	0.321056	0.481863	0.0091036	0.997718	0.986769	0.344525	0.00292353
1370814_at	AB062758	dehydrogenase/reductase (SDR family) member 4	Dhrs4	0.304932	0.00411678	0.0690162	0.00331253	0.442365	0.0388878	0.110104	0.0127223
1374617_at	AI408791	dehydrogenase/reductase (SDR family) member 7B	Dhrs7b	0.781344	0.268058	1.13284	0.707575	1.01881	0.866806	1.08294	0.599437
1374440_at	BE098506	dehydrogenase/reductase (SDR family) member 8	Dhrs8	1.14184	0.406846	1.94786	0.131161	1.19149	0.348245	1.53637	0.0614556
1388832_at	AI104245	dehydrogenase/reductase (SDR family) X chromosome (predicted)	Dhrsx_predicted	0.749784	0.692346	1.09126	0.0652466	1.13196	0.706509	0.999048	0.983339
1387103_s_at	NM_031720	deiodinase, iodothyronine, type II /// solute carrier family 25 (mitochondrial carrier, brain), member 14	Dio2 /// Slc25a14	0.468312	0.130188	0.690259	0.00954908	0.591457	0.322869	0.619065	0.0148851
1372259_at	BI295054	DEK oncogene (DNA binding)	Dek	1.11469	0.612897	0.846568	0.0303781	2.1718	0.011831	0.934806	0.102181
1374564_at	BE099401	deltex 2 homolog (Drosophila)	Dtx2	1.33639	0.00144888	0.671649	0.0896912	2.53414	0.00748634	0.928236	0.460039
1370506_at	U46149	demethyl-Q 7	Coq7	0.54683	0.0970612	1.00423	0.997664	0.283499	0.103501	0.507516	0.13427
1380021_at	AI059486	DENN/MADD domain containing 2D (predicted)	Dennd2d_predicted	8.53882	0.00700267	13.2399	0.000990616	13.3887	9.08608e-05	13.4757	0.000246958
1387626_at	NM_024158	deoxycytidine kinase	Dck	0.783618	0.883438	1.00398	0.999407	1.0077	0.914523	1.74835	0.442542
1372799_at	BF285179	deoxyguanosine kinase (predicted)	Dguok_predicted	1.13621	0.808504	0.373826	0.0212321	0.921655	0.535502	0.457698	0.000601256
1379435_at	AI599463	deoxyguanosine kinase (predicted)	Dguok_predicted	1.43499	0.99353	0.354683	0.0412281	0.613035	0.384301	0.397065	0.166185
1388803_at	AA892493	deoxyhypusine synthase	Dhps	0.530331	0.754706	0.710254	0.682793	0.692361	0.269224	1.04072	0.819663
1370914_at	BM384112	deoxynucleotidyltransferase, terminal, interacting protein 1	Dnttip1	0.71548	0.16845	0.898417	0.700392	0.479529	0.269454	0.883204	0.437275
1370915_s_at	BM384112	deoxynucleotidyltransferase, terminal, interacting protein 1	Dnttip1	0.551484	0.214489	0.865083	0.54131	0.581529	0.0668178	0.575584	0.592652
1383256_at	BF410997	deoxynucleotidyltransferase, terminal, interacting protein 2 (predicted)	Dnttip2_predicted	0.627326	0.0278621	1.13345	0.111469	0.647923	0.00428372	1.07237	0.827106
1382119_at	BI303937	deoxynucleotidyltransferase, terminal, interacting protein 2 (predicted)	Dnttip2_predicted	0.981809	0.795001	0.952974	0.098302	0.894354	0.85066	0.964323	0.0327572
1379676_a_at	AW527320	deoxyribonuclease 1-like 1	Dnase1l1	1.35439	0.00764931	0.98412	0.462821	1.81958	0.0839917	2.48476	0.0255028
1368294_at	NM_053907	deoxyribonuclease I-like 3	Dnase1l3	1.21151	0.208187	0.828831	0.985854	2.44558	0.0119691	1.09198	0.356089
1383067_a_at	AW141143	deoxythymidylate kinase (predicted)	Dtymk_predicted	0.989786	0.618512	1.43643	0.167426	1.49626	0.12654	1.15427	0.346857
1383068_at	BI290898	deoxythymidylate kinase (predicted)	Dtymk_predicted	0.906803	0.818573	1.17406	0.0382678	1.14782	0.330326	1.07901	0.355689
1387865_at	AI411157	deoxyuridine triphosphatase	Dut	0.278998	0.0017874	0.302568	0.0225996	0.271454	0.00299078	0.384033	5.18431e-05
1376914_at	AW253690	DEP domain containing 1a (predicted)	Depdc1a_predicted	1.79845	0.24361	0.739362	0.0557242	1.36352	0.147915	0.796735	0.288535
1380817_at	BF394055	DEP domain containing 2 (predicted)	Depdc2_predicted	1.17925	0.666798	0.890995	0.171799	0.880275	0.998218	1.0332	0.599953
1373752_at	BE108494	DEP domain containing 5 (predicted)	Depdc5_predicted	1.04655	0.085286	0.520989	0.0460534	1.72662	0.957869	0.916196	0.217783
1395562_at	AW524172	Dephospho-CoA kinase domain containing	Dcakd	0.791165	0.771852	0.996525	0.922802	1.02468	0.285627	0.995425	0.680121
1373461_at	AI412649	dermal papilla derived protein 6	DERP6	1.10925	0.546945	1.431	0.023911	1.45044	0.0243722	1.37593	0.117708
1373947_at	BI278545	dermatopontin (predicted)	Dpt_predicted	1.00024	0.731107	0.60943	0.059186	0.998133	0.307418	0.597803	0.0378498
1375936_at	BI279663	desmocollin 2	Dsc2	0.497568	0.131781	1.03792	0.764023	0.519504	0.055974	0.842223	0.300355
1388506_at	AW144509	desmoplakin	Dsp	1.51583	0.00519357	1.85499	0.0747256	1.29166	0.0349604	2.48255	0.209957
1371375_at	BI285599	destrin	Dstn	1.35396	0.106943	1.53712	0.0101404	0.878461	0.601578	1.05682	0.351569
1375881_at	AI170442	destrin	Dstn	1.81466	0.132223	1.25894	0.228406	0.867975	0.897215	0.906146	0.153757
1380545_at	BF419027	development and differentiation enhancing (predicted)	Ddef1_predicted	0.427393	0.00659351	1.08084	0.360099	0.948176	0.244354	0.782358	0.905197
1390441_at	AW527409	Development and differentiation enhancing (predicted)	Ddef1_predicted	0.76843	0.259904	0.389208	0.00273645	0.616039	0.0257909	0.616889	0.0207328
1385228_x_at	AI059117	development and differentiation enhancing (predicted)	Ddef1_predicted	0.892604	0.361742	1.58978	0.0102148	1.09552	0.738369	1.59265	0.0130423
1384717_at	AA894199	Development and differentiation enhancing (predicted)	Ddef1_predicted	0.881724	0.617828	0.886212	0.872329	1.22826	0.125834	0.902764	0.121539
1381018_a_at	BG378709	development and differentiation enhancing (predicted)	Ddef1_predicted	1.03232	0.925219	1.24033	0.0250712	0.845969	0.0255593	1.1443	0.165626
1381019_x_at	BG378709	development and differentiation enhancing (predicted)	Ddef1_predicted	1.01896	0.936674	1.34672	0.312863	1.02042	0.0942499	1.21708	0.150541
1391602_at	AW527113	developmentally regulated GTP binding protein 1	Drg1	3.13998	0.0908741	0.73971	0.514428	0.570563	0.412502	0.92272	0.146217
1386979_at	NM_133395	developmentally regulated protein TPO1	Tpo1	1.38741	0.196968	1.046	0.926472	2.18634	0.0636975	1.18234	0.102999
1376307_a_at	BI289591	developmentally regulated RNA-binding protein 1	Drb1	0.584864	0.00705403	0.635002	0.00319747	0.674726	0.0864073	0.886257	0.758412
1372017_at	BE110572	diablo homolog (Drosophila)	Diablo	0.583519	0.0119552	0.796552	0.00800665	0.530573	0.0611429	0.762708	0.0902398
1367745_at	NM_031143	diacylglycerol kinase zeta	Dgkz	0.82784	0.0748469	1.96354	0.242418	0.672508	0.102443	1.73508	0.233487
1387190_at	NM_080787	diacylglycerol kinase, alpha	Dgka	0.987786	0.895873	1.2256	0.0409087	2.17127	0.0341419	1.11645	0.185956
1397303_at	AI178467	Diacylglycerol kinase, alpha	Dgka	1.03478	0.915553	1.01029	0.966896	0.789977	0.248734	1.09623	0.99704
1381486_at	BF386108	Diacylglycerol kinase, beta	Dgkb	1.21134	0.92666	0.763093	0.478634	0.916649	0.824056	1.02608	0.104053
1374109_at	AI230466	diacylglycerol kinase, theta (predicted)	Dgkq_predicted	0.807631	0.141348	0.645617	0.114041	0.86367	0.287967	0.987043	0.277851
1367915_at	NM_053437	diacylglycerol O-acyltransferase 1	Dgat1	0.75363	0.494574	0.902002	0.689995	0.635106	0.0273871	0.736528	0.0853299
1389371_at	AI104077	Diaphanous homolog 2 (Drosophila) (predicted)	Diap2_predicted	1.82074	0.513745	1.833	0.0101521	1.14705	0.534415	1.50308	0.00389226
1370235_at	AI175009	diazepam binding inhibitor	Dbi	0.887843	0.671174	0.688636	0.187968	0.906909	0.452654	0.784046	0.0546847
1367909_at	NM_134387	dicarbonyl L-xylulose reductase	Dcxr	0.240406	0.00804608	0.887983	0.718765	0.264326	0.00837425	0.570065	0.250678
1398643_at	BF388566	Dicer1, Dcr-1 homolog (Drosophila)	Dicer1	1.63463	0.485721	0.716612	0.671054	0.603766	0.0231192	0.895864	0.801207
1388685_at	AI011749	DiGeorge syndrome critical region gene 2	Dgcr2	0.708858	0.0227984	0.69648	0.0186635	0.582248	0.0496109	0.575369	0.0144488
1373424_at	BF284776	DiGeorge syndrome critical region gene 6 (predicted)	Dgcr6_predicted	0.934127	0.691888	0.863397	0.574094	1.00368	0.978016	0.621837	0.185559
1370075_at	NM_130400	dihydrofolate reductase	Dhfr	1.02478	0.149649	1.18238	0.506031	1.19856	0.24912	1.44685	0.0156258
1373201_at	AI412898	Dihydrolipoamide branched chain transacylase E2	Dbt	0.362694	0.0516782	0.606468	0.0164614	0.486625	0.000731388	0.532839	0.00629605
1373016_at	AI410493	dihydrolipoamide dehydrogenase	Dld	0.350404	0.48271	0.941888	0.317754	0.750063	0.666507	0.79324	0.0199644
1388194_at	BI295900	dihydrolipoamide S-acetyltransferase (E2 component of pyruvate dehydrogenase complex)	Dlat	0.579566	0.0909854	0.583303	0.150002	0.571645	0.0327522	0.722243	0.430713
1370879_at	D90401	dihydrolipoamide S-succinyltransferase (E2 component of 2-oxo-glutarate complex)	Dlst	0.894959	0.657613	0.831126	0.117383	1.18875	0.808809	0.898142	0.132241
1382348_at	AI230216	dihydroorotate dehydrogenase	Dhodh	0.531816	0.0185872	1.63357	0.0214611	0.544576	0.0100892	1.45409	0.0693652
1380728_at	BE118404	Dihydropyrimidinase-like 2	Dpysl2	0.98276	0.972303	0.602162	0.448566	0.915204	0.772114	0.583724	0.612798
1388479_at	BI294841	Dihydropyrimidinase-like 3	Dpysl3	4.09081	0.00244871	1.91206	0.105308	5.80426	0.000415044	1.66353	0.0731396
1387141_at	NM_023023	dihydropyrimidinase-like 5	Dpysl5	0.602032	0.962097	0.44966	0.000991285	1.30162	0.226786	0.516054	0.008677
1389595_at	BM386615	dihydrouridine synthase 2-like, SMM1 homolog (S. cerevisiae) (predicted)	Dus2l_predicted	1.79958	0.110812	1.27745	0.0740265	0.680051	0.559139	2.09567	0.0268482
1374979_at	AI102764	dihydrouridine synthase 3-like (S. cerevisiae)	Dus3l	1.11633	0.697844	2.2542	0.0166991	1.07893	0.714695	2.36369	0.0469082
1367966_at	NM_053748	dipeptidylpeptidase 3	Dpp3	1.06883	0.865777	1.17255	0.0182884	1.11024	0.659225	0.979821	0.754681
1367722_at	NM_031973	dipeptidylpeptidase 7	Dpp7	1.10534	0.339348	2.3102	0.00497604	0.834565	0.108006	1.82143	0.0062941
1382213_at	AI535527	dipeptidylpeptidase 8 (predicted)	Dpp8_predicted	1.52396	0.0528551	1.37147	0.0193069	1.51931	0.103804	1.32909	0.0928135
1374964_at	AI175505	dipeptidylpeptidase 8 (predicted)	Dpp8_predicted	1.32565	0.282477	0.973294	0.813538	1.24503	0.278831	0.911192	0.363393
1370053_at	BE116953	Discs, large (Drosophila) homolog-associated protein 1	Dlgap1	0.679266	0.20257	1.2493	0.678982	1.65037	0.784401	1.11002	0.853689
1394485_at	AW532781	Discs, large (Drosophila) homolog-associated protein 1	Dlgap1	1.17592	0.243826	0.99965	0.998138	1.00611	0.933646	1.0032	0.983277
1384197_at	AW521536	Discs, large (Drosophila) homolog-associated protein 1	Dlgap1	1.49491	0.575657	1.56446	0.10988	1.77555	0.0377491	0.898903	0.917389
1380807_at	AW529655	Discs, large homolog 1 (Drosophila)	Dlgh1	0.662232	0.503493	0.464671	0.188734	1.83577	0.328261	0.642808	0.134588
1388816_at	AI413060	Discs, large homolog 1 (Drosophila)	Dlgh1	1.07862	0.529765	0.79587	0.100962	1.15197	0.968954	0.906781	0.467326
1398276_at	NM_022282	discs, large homolog 2 (Drosophila)	Dlgh2	0.50876	0.0543993	1.96998	0.034061	0.164593	0.00236981	1.04299	0.268579
1387210_at	NM_019621	discs, large homolog 4 (Drosophila) /// hypothetical gene supported by NM_019621	Dlgh4 /// LOC497670	1.01366	0.864385	0.980342	0.753675	1.3972	0.1065	0.917031	0.217643
1377121_at	AW520410	Discs, large homolog 5 (Drosophila) (predicted)	Dlg5_predicted	0.820624	0.783063	0.877833	0.183039	0.74112	0.0338912	0.907043	0.0693379
1367618_a_at	NM_130734	discs, large homolog 5 (Drosophila) (predicted)	Dlg5_predicted	0.973439	0.982122	1.19377	0.0156972	0.750464	0.0672685	1.14411	0.0851644
1376684_at	AA874827	discs, large homolog 7 (Drosophila) (predicted)	Dlg7_predicted	1.00098	0.995979	0.993258	0.993328	1.33948	0.456396	0.994906	0.984698
1370507_at	U67140	discs, large homolog-associated protein 4 (Drosophila)	Dlgap4	1.47379	0.0779304	2.389	0.0275356	1.66096	0.0761308	2.17611	0.0162611
1398184_at	BI294805	Dishevelled associated activator of morphogenesis 1 (predicted)	Daam1_predicted	1.338	0.0554798	1.17067	0.510743	1.28708	0.970756	1.05057	0.307495
1369997_at	NM_031820	dishevelled, dsh homolog 1 (Drosophila)	Dvl1	1.02093	0.417594	2.23915	0.00465182	0.512453	0.0183821	1.67593	0.0151765
1375433_at	AI412473	Dispatched homolog 2 (Drosophila) (predicted)	Disp2_predicted	0.875448	0.141927	0.383378	0.00109157	0.686457	0.070443	0.435639	0.00499026
1390102_at	AI168996	disrupted in renal carcinoma 2 homolog (human)	Dirc2	1.17019	0.137785	0.752068	0.329957	1.01027	0.991179	0.799799	0.0373458
1380558_at	BM391243	distal-less homeobox 3 (predicted)	Dlx3_predicted	1.0996	0.735969	1.18691	0.916819	1.26759	0.2454	1.15183	0.672772
1367516_at	BG375549	distrobrevin binding protein 1	Dtnbp1	1.8963	0.0340908	3.95944	0.000123053	1.5155	0.0204483	3.48913	0.0139082
1397473_at	AI029288	distrobrevin binding protein 1	Dtnbp1	1.72242	0.153641	1.56506	0.0139661	1.5952	0.600866	1.84407	0.0849906
1398928_at	BG378296	divalent cation tolerant protein CUTA	Cuta	0.55103	0.164469	1.54942	0.00585486	0.569248	0.00042919	1.28871	0.0172348
1396056_at	AW527531	Dmx-like 1 (predicted)	Dmxl1_predicted	1.29606	0.0553791	0.802433	0.769229	0.999169	0.787511	0.968153	0.909742
1373772_at	AI179516	DNA (cytosine-5-)-methyltransferase 1	Dnmt1	0.82793	0.133586	0.870203	0.519417	0.998872	0.451003	0.998233	0.987328
1369438_at	NM_022857	DNA binding protein N5	N5	1.19534	0.812754	1.08393	0.381934	1.46929	0.525727	1.00384	0.842393
1383495_at	AI556858	DNA cross-link repair 1A, PSO2 homolog (S. cerevisiae) (predicted)	Dclre1a_predicted	1.71317	0.11934	0.786694	0.305135	0.934675	0.963334	0.565937	0.012622
1388591_at	BM383669	DNA cross-link repair 1B, PSO2 homolog (S. cerevisiae)	Dclre1b	0.842683	0.202206	0.817459	0.233616	1.00785	0.68402	1.09245	0.164569
1389195_at	AI236726	DNA fragmentation factor, alpha subunit	Dffa	0.903332	0.838486	0.876719	0.168144	1.24695	0.341288	1.28791	0.035994
1387604_at	NM_053362	DNA fragmentation factor, beta subunit	Dffb	0.999208	0.894125	0.826967	0.23383	0.998872	0.958336	0.73578	0.238733
1392678_a_at	AA956455	DNA methyltransferase 3A	Dnmt3a	2.81493	0.0164503	1.45711	0.0121014	1.71272	0.00791585	1.47065	0.0309548
1384804_at	AI029751	DNA methyltransferase 3A	Dnmt3a	1.48131	0.820665	1.38618	0.102266	0.8137	0.204724	1.44473	0.055756
1388182_at	BE108911	DNA primase, p49 subunit	Prim1	0.562509	0.0838967	0.790973	0.784691	0.522303	0.0388813	0.843374	0.321362
1384368_at	AA900084	DNA2 DNA replication helicase 2-like (yeast) (predicted)	Dna2l_predicted	0.482565	0.0936102	0.538555	0.0604936	0.533811	0.00969978	0.540238	0.00118505
1375758_at	BF404935	DNA2 DNA replication helicase 2-like (yeast) (predicted)	Dna2l_predicted	1.02989	0.234676	0.940413	0.931156	1.00296	0.970842	1.23476	0.450797
1376178_at	BF403703	DNA-damage inducible transcript 3	Ddit3	1.81022	0.0230412	1.95421	0.0810292	1.41692	0.082151	1.6711	0.0173787
1369590_a_at	NM_024134	DNA-damage inducible transcript 3	Ddit3	1.6577	0.0516174	7.85981	0.000593943	1.18888	0.131137	7.10355	0.000395377
1368025_at	NM_080906	DNA-damage-inducible transcript 4	Ddit4	1.56786	0.210489	3.35591	0.000346282	1.63207	0.0650175	3.06025	0.00594844
1398819_at	NM_022934	DnaJ (Hsp40) homolog, subfamily A, member 1	Dnaja1	0.976514	0.892758	1.3612	0.00382522	1.05707	0.368267	1.11943	0.121602
1387780_at	NM_032079	DnaJ (Hsp40) homolog, subfamily A, member 2	Dnaja2	0.78851	0.455693	1.71247	0.0080065	0.795075	0.335194	1.67433	0.00358005
1378392_at	BG377107	DnaJ (Hsp40) homolog, subfamily A, member 3	Dnaja3	0.749458	0.346605	1.41121	0.0404857	0.716963	0.0707349	1.37824	0.0831896
1389845_at	BI282224	DnaJ (Hsp40) homolog, subfamily A, member 3	Dnaja3	0.760836	0.491988	1.40079	0.00323387	0.62086	0.0161106	1.23249	0.0162799
1372103_at	BM386931	DnaJ (Hsp40) homolog, subfamily A, member 4	Dnaja4	0.525831	0.061034	0.254754	0.00494187	0.519607	0.0231604	0.296307	0.00229696
1398343_at	AI104324	DnaJ (Hsp40) homolog, subfamily A, member 4	Dnaja4	0.872847	0.274056	1.01877	0.870938	0.88418	0.474213	0.919261	0.483551
1395572_at	BF565278	DnaJ (Hsp40) homolog, subfamily A, member 4	Dnaja4	1.0415	0.642533	1.01666	0.92379	1.01747	0.656216	0.669459	0.0393434
1388722_at	AA945704	DnaJ (Hsp40) homolog, subfamily B, member 1 (predicted)	Dnajb1_predicted	0.613952	0.0752666	2.57974	0.016982	0.682227	0.10633	1.70567	0.119296
1383302_at	BM384926	DnaJ (Hsp40) homolog, subfamily B, member 1 (predicted)	Dnajb1_predicted	0.745068	0.0924993	19.6881	0.000760464	0.88614	0.176186	2.9106	0.0552326
1389308_at	BI295873	DnaJ (Hsp40) homolog, subfamily B, member 11	Dnajb11	0.603043	0.145491	1.35341	0.0321715	0.833797	0.483355	1.2929	0.0562507
1372722_at	AI175031	DnaJ (Hsp40) homolog, subfamily B, member 4	Dnajb4	0.388618	0.0545726	0.545357	0.00991737	0.429232	0.000788459	0.650148	0.0326214
1378843_at	AW528827	DnaJ (Hsp40) homolog, subfamily B, member 6	Dnajb6	1.38622	0.162351	1.21486	0.534499	1.0526	0.566707	1.54639	0.0964637
1391422_at	BE100486	DnaJ (Hsp40) homolog, subfamily B, member 6	Dnajb6	1.22975	0.412101	2.03395	0.0580179	1.33932	0.00811904	1.82028	0.173698
1382024_at	BM383877	DnaJ (Hsp40) homolog, subfamily B, member 6 /// similar to mDj4 (predicted) /// similar to DnaJ homolog subfamily B member 6 (Heat shock protein J2) (predicted)	Dnajb6 /// RGD1562684_predicted /// RGD1565241_predicted	1.02254	0.620256	1.15885	0.246509	1.06433	0.372126	1.00374	0.956078
1387116_at	NM_012699	DnaJ (Hsp40) homolog, subfamily B, member 9	Dnajb9	1.05387	0.632463	1.25643	0.0832778	0.830165	0.644603	1.16814	0.0222954
1392388_at	BE112281	DnaJ (Hsp40) homolog, subfamily C, member 1 (predicted)	Dnajc1_predicted	1.05468	0.0877416	0.824533	0.0851289	0.576488	0.0116552	0.961582	0.40261
1376079_at	BI295806	DnaJ (Hsp40) homolog, subfamily C, member 1 (predicted)	Dnajc1_predicted	0.606062	0.329532	0.620793	0.00368998	0.476895	0.0353665	0.599748	0.0167238
1389290_at	AI172034	DnaJ (Hsp40) homolog, subfamily C, member 10	Dnajc10	0.801208	0.0352973	0.562301	0.0283458	0.948017	0.517454	0.699962	0.0453769
1373813_at	BM388610	DnaJ (Hsp40) homolog, subfamily C, member 10	Dnajc10	0.775748	0.928576	0.488263	0.00132745	1.08421	0.672063	0.993398	0.777478
1372189_at	AI411144	DnaJ (Hsp40) homolog, subfamily C, member 13 (predicted)	Dnajc13_predicted	1.24993	0.0385552	0.849545	0.0310373	1.52698	0.146817	1.00449	0.957022
1369714_at	NM_053690	DnaJ (Hsp40) homolog, subfamily C, member 14	Dnajc14	1.75505	0.0531492	1.69961	0.805004	1.73032	0.107656	1.48238	0.511126
1373064_at	BM390416	DnaJ (Hsp40) homolog, subfamily C, member 15 (predicted)	Dnajc15_predicted	0.586084	0.218643	1.16988	0.371645	0.4315	0.00756798	1.22764	0.169112
1373004_at	AA964764	DnaJ (Hsp40) homolog, subfamily C, member 2	Dnajc2	0.99303	0.982707	1.56721	0.104493	0.692745	0.0589078	1.02386	0.880141
1370073_at	NM_022232	DnaJ (Hsp40) homolog, subfamily C, member 3	Dnajc3	0.844283	0.248277	0.881536	0.214041	0.778431	0.11055	0.878082	0.195542
1372428_at	BG380252	DnaJ (Hsp40) homolog, subfamily C, member 4	Dnajc4	1.02933	0.552396	1.85924	0.0926226	0.984775	0.757492	1.03537	0.294241
1369813_at	U39320	DnaJ (Hsp40) homolog, subfamily C, member 5	Dnajc5	0.876165	0.790545	24.5021	0.000767045	0.264991	0.0356581	15.7091	0.00215619
1377125_at	AW523481	DnaJ (Hsp40) homolog, subfamily C, member 6 (predicted)	Dnajc6_predicted	0.58741	0.000706226	0.45553	0.000686529	0.587146	0.00067373	0.5906	0.00363763
1386648_at	AW914996	DnaJ (Hsp40) homolog, subfamily C, member 6 (predicted)	Dnajc6_predicted	0.623736	0.00778875	0.355997	0.00370807	0.637516	0.00435563	0.484615	0.00164638
1374744_at	BF392285	DnaJ (Hsp40) homolog, subfamily C, member 7	Dnajc7	0.937965	0.129042	1.05526	0.351049	0.522716	0.151576	0.91604	0.386459
1371784_at	BI285682	DnaJ (Hsp40) homolog, subfamily C, member 7	Dnajc7	1.00675	0.542952	1.01593	0.499917	1.40642	0.00569421	0.813238	0.555364
1378781_at	AI712400	DnaJ (Hsp40) homolog, subfamily C, member 8	Dnajc8	1.65521	0.1046	1.09079	0.0468906	1.13173	0.422677	1.07335	0.813937
1367492_at	AI227785	DnaJ (Hsp40) homolog, subfamily C, member 8	Dnajc8	0.967162	0.476778	1.25938	0.0305906	1.16262	0.381175	1.30569	0.0709462
1383181_at	AI704947	DnaJ (Hsp40) homolog, subfamily C, member 9 (predicted)	Dnajc9_predicted	0.457993	0.0130309	0.783499	0.0610206	0.279367	0.0104061	0.920193	0.0544979
1368664_at	AI138041	dnaj-like protein	LOC56764	1.54873	0.416305	0.988141	0.970616	1.06048	0.995632	0.949712	0.989029
1383630_at	BG377464	docking protein 3 (predicted)	Dok3_predicted	1.00182	0.28318	1.00515	0.933045	0.766602	0.206471	1.06037	0.770578
1372300_at	BI288838	docking protein 4 (predicted)	Dok4_predicted	0.906424	0.392003	0.986781	0.900142	0.970051	0.330932	0.989223	0.893474
1380004_at	BG373440	Dodecenoyl-coenzyme A delta isomerase	Dci	1.2284	0.250476	0.505672	0.127595	1.30098	0.243333	1.18916	0.746783
1367659_s_at	NM_017306	dodecenoyl-coenzyme A delta isomerase	Dci	1.26639	0.941876	0.858241	0.262395	1.58076	0.0837583	0.940041	0.878017
1377593_at	BI284172	dolichol-phosphate (beta-D) mannosyltransferase 1 (predicted)	Dpm1_predicted	0.510584	0.128076	0.647752	0.00533988	0.510425	0.0072325	0.681203	0.0182921
1391372_at	BF405555	Dolichol-phosphate (beta-D) mannosyltransferase 1 (predicted)	Dpm1_predicted	0.797689	0.35533	1.47494	0.121526	1.08703	0.741451	1.05953	0.222588
1367751_at	NM_019252	dolichol-phosphate (beta-D) mannosyltransferase 2	Dpm2	0.530993	0.332721	0.671121	0.0132933	0.457664	0.0449525	0.890074	0.200865
1372247_at	BF282907	dolichyl-di-phosphooligosaccharide-protein glycotransferase (predicted)	Ddost_predicted	0.749058	0.477319	0.71864	0.00409339	0.785721	0.26937	0.692845	0.00694392
1372270_at	BM391270	dolichyl-phosphate (UDP-N-acetylglucosamine) N-acetylglucosaminephosphotransferase 1 (GlcNAc-1-P transferase)	H2afx	1.06859	0.530288	1.19997	0.0245364	1.30704	0.483895	1.19845	0.0105444
1368064_a_at	U31884	dopa decarboxylase	Ddc	0.835929	0.141817	0.165693	0.00138683	0.652223	0.0498742	0.139355	0.00816368
1368479_at	M35077	dopamine receptor D1A	Drd1a	1.03326	0.927883	1.10105	0.16973	1.72018	0.0697327	1.14021	0.0673769
1374651_at	BM386987	dopey family member 2 (predicted)	Dopey2_predicted	0.754886	0.186254	0.401744	0.000927018	0.585164	0.0146274	0.311861	0.0116126
1388589_at	BG381046	DOT1-like, histone H3 methyltransferase (S. cerevisiae) (predicted)	Dot1l_predicted	1.28936	0.0758555	1.67197	0.167346	1.04082	0.683891	1.45656	0.194259
1369686_at	U78857	double cortin and calcium/calmodulin-dependent protein kinase-like 1	Dcamkl1	0.310012	0.00504398	0.212326	0.000585876	0.360539	0.0210606	0.147858	0.000105943
1374966_at	BE109057	doublecortin	Dcx	0.687965	0.531707	0.114755	5.39683e-05	0.980356	0.345825	0.111941	0.0155109
1389066_at	BI274408	Down syndrome critical region gene 1-like 1	Dscr1l1	0.0841065	0.00121843	0.092492	0.0201542	0.157123	0.0365678	0.142664	0.00164509
1396528_at	BF404786	Down syndrome critical region gene 1-like 1	Dscr1l1	0.7264	0.214202	0.148214	0.00339656	0.523025	0.0642426	0.241576	0.007359
1374235_at	AI138048	Down syndrome critical region gene 1-like 1	Dscr1l1	0.765605	0.261264	0.675995	0.0766379	0.454082	0.0171086	0.657784	9.84904e-05
1398560_at	AW530670	Down syndrome critical region gene 1-like 1	Dscr1l1	0.996211	0.911812	0.55303	0.0658161	1.32433	0.213423	0.572087	0.101693
1396706_at	BF398967	Down syndrome critical region gene 1-like 1	Dscr1l1	1.03002	0.96323	0.590088	0.154343	1.061	0.561867	0.876567	0.417257
1388686_at	AI170193	Down syndrome critical region homolog 1 (human)	Dscr1	0.999378	0.990717	1.14065	0.695463	1.0155	0.361576	1.67458	0.0034409
1371385_at	BF407158	Down syndrome critical region homolog 2 (human) (predicted)	Dscr2_predicted	0.710113	0.156903	0.922646	0.0143994	0.555266	0.0212082	0.923786	0.07249
1391648_at	BF545697	Down syndrome critical region homolog 6 (human) (predicted)	Dscr6_predicted	0.173634	0.00541266	0.0887294	0.00985958	0.240881	0.0947868	0.190318	0.0559958
1372453_at	AI012637	down-regulator of transcription 1	Dr1	0.655227	0.00948314	0.602322	0.00889795	0.726095	0.0529056	0.604652	0.0434923
1384005_at	BG662895	down-regulator of transcription 1	Dr1	0.897428	0.202018	0.99018	0.130713	0.999148	0.969091	0.85778	0.341591
1376026_at	AI178243	downstream neighbor of SON	Donson	7.9958	0.0067243	3.97228	0.00545031	33.4247	0.000107282	14.9006	0.00357116
1390272_at	BM386608	DPH5 homolog (S. cerevisiae)	Dph5	0.860829	0.603385	2.21875	0.0152721	0.86193	0.348653	2.21754	0.0294914
1389483_at	AI408686	Dpy-19-like 1 (C. elegans) (predicted)	Dpy19l1_predicted	0.518802	0.000318068	0.617445	0.00208457	0.586533	0.00438394	0.666425	0.0875632
1375174_at	BI296653	Dpy-19-like 1 (C. elegans) (predicted)	Dpy19l1_predicted	0.728303	0.973582	0.970808	0.860355	0.989708	0.973405	0.908221	0.402394
1371383_at	BI296428	Dr1 associated protein 1 (negative cofactor 2 alpha) (predicted)	Drap1_predicted	1.0313	0.906113	1.25034	0.401143	1.24875	0.0175712	1.17315	0.0673046
1368274_at	NM_031352	drebrin-like	Dbnl	3.24919	0.00616007	1.64571	0.0993813	4.08205	0.000164966	1.98542	0.0290247
1373460_at	AI178790	D-serine modulator-1	Dsm-1	1.27067	0.451522	0.717424	0.123578	1.33213	0.328247	0.33827	0.0678501
1378377_at	BF552453	dual adaptor for phosphotyrosine and 3-phosphoinositides 1 (predicted)	Dapp1_predicted	1.00108	0.954417	2.49659	0.0318679	1.33289	0.16493	1.36648	0.448398
1387414_at	NM_024141	dual oxidase 2	Duox2	1.35031	0.189698	2.1011	0.186399	1.00167	0.974478	0.996997	0.977988
1368146_at	U02553	dual specificity phosphatase 1	Dusp1	4.53931	0.000608664	7.22782	9.61811e-05	2.85207	0.0274256	4.75687	0.000383783
1394028_at	AW916472	dual specificity phosphatase 10 (predicted)	Dusp10_predicted	2.2746	0.0570005	0.459388	0.00325551	1.23685	0.421135	0.441179	0.0428789
1376576_at	BM387750	dual specificity phosphatase 11 (RNA/RNP complex 1-interacting)	Dusp11	1.05285	0.713083	1.80292	0.0415497	1.36946	0.0331082	1.3839	0.0338088
1387457_at	NM_022248	dual specificity phosphatase 12	Dusp12	1.00187	0.949425	1.21778	0.252849	1.05302	0.702992	0.998282	0.777586
1375967_a_at	AI172067	dual specificity phosphatase 22 (predicted)	Dusp22_predicted	0.766888	0.158915	0.934499	0.439019	0.979941	0.389321	0.96355	0.669749
1374379_at	BF396810	Dual specificity phosphatase 23 (predicted)	Dusp23_predicted	0.31891	0.255176	0.492366	0.00824394	0.341938	0.122657	0.533311	0.087006
1375475_at	BE111304	Dual specificity phosphatase 5	Dusp5	0.216154	0.0414031	0.980185	0.878445	0.15923	0.0345976	0.979151	0.890599
1368124_at	NM_133578	dual specificity phosphatase 5	Dusp5	0.462158	0.136478	0.285013	0.000550674	0.224806	0.00418528	0.327454	0.0319692
1382778_at	AI231350	Dual specificity phosphatase 6	Dusp6	0.736152	0.289385	1.08108	0.595167	1.41552	0.642506	1.07402	0.522533
1377064_at	AI602811	dual specificity phosphatase 6	Dusp6	0.687573	0.566204	1.00077	0.678038	1.26469	0.552605	0.998272	0.441334
1377992_at	AI111775	Dual specificity phosphatase 7	Dusp7	0.445558	0.284805	0.913122	0.869312	0.401811	0.0353768	0.577606	0.0271334
1386396_at	AW528387	dual specificity phosphatase 8 (predicted)	Dusp8_predicted	1.57584	0.0012389	1.48479	0.0546953	1.65032	0.00942631	1.4076	0.457715
1373340_at	AI179321	dual specificity phosphatase 9	Dusp9	0.998601	0.966303	1.36962	0.058307	0.999161	0.998206	1.23871	0.0538077
1370183_at	BI303285	dual-specificity tyrosine-(Y)-phosphorylation regulated kinase 1A	Dyrk1a	1.28426	0.375218	2.16022	0.00526339	1.14138	0.576468	2.01276	0.0484217
1383601_at	BI295614	DUF729 domain containing 1 (predicted)	Dufd1_predicted	1.5606	0.178659	1.90073	0.0722876	2.25903	0.0603755	1.01736	0.823176
1381555_at	BI288686	DUF729 domain containing 1 (predicted)	Dufd1_predicted	1.71628	0.283446	1.43481	0.260233	2.34213	0.0514499	1.03512	0.925276
1375299_at	AI103331	Dullard homolog (Xenopus laevis)	Dullard	0.902556	0.513932	0.978137	0.25819	0.922333	0.0754646	0.972989	0.456032
1373502_at	BM389188	Dymeclin (predicted)	Dym_predicted	0.326837	0.163941	1.04773	0.622408	0.202699	0.0101757	0.843621	0.195234
1380042_at	AA964012	Dynactin 1	Dctn1	0.317518	0.00784557	0.980296	0.788783	0.706163	0.104889	0.739202	0.603864
1367848_at	NM_024130	dynactin 1	Dctn1	0.459241	0.0326557	0.714041	0.0254925	0.35614	0.02258	0.779198	0.0380305
1371834_at	BF283695	dynactin 2	Dctn2	0.781076	0.0310313	1.07112	0.223327	0.930826	0.82591	0.896776	0.220492
1398900_at	AA893211	dynactin 3 (predicted)	Dctn3_predicted	0.813985	0.363063	0.779635	0.0835997	0.542104	0.00954107	0.761498	0.357208
[truncated: 13,777 more rows]
