# Supplementary material for: Cytokines Interleukin-1β and Tumor Necrosis Factor-α Regulate Different Transcriptional and Alternative Splicing Networks in Primary β-Cells
Source: PubMed Central journal article supplement — Diabetes. 2009 Nov 23;59(2):358–74. doi: 10.2337/db09-1159 (PMC2809955; doi:10.2337/db09-1159), 2009-11-23
Supplement: supp_db09-1159_db09-1159_Suppl_Table_III.pdf [file supp_db09-1159_db09-1159_Suppl_Table_III.pdf]

**Suppl. Table III: List of all transcripts detected as present by array analysis in FACS purified rat  $\beta$ -cells**

| Probe Set ID | GeneBank  | Gene Title                                                                                                  | Gene Symbol      | IL+IFN 6h |       | IL+IFN 24h |       | TNF+IFN 6h |       | TNF+IFN 24h |       |
|--------------|-----------|-------------------------------------------------------------------------------------------------------------|------------------|-----------|-------|------------|-------|------------|-------|-------------|-------|
|              |           |                                                                                                             |                  | FC        | Pval  | FC         | Pval  | FC         | Pval  | FC          | Pval  |
| 1371748_at   | BI284306  | 1-acylglycerol-3-phosphate O-acyltransferase 1                                                              | Agpat1           | 0.987     | 0.511 | 0.799      | 0.054 | 1.200      | 0.163 | 0.959       | 0.553 |
| 1374570_at   | AI012474  | 1-acylglycerol-3-phosphate O-acyltransferase 2 (lysophosphatidic acid acyltransferase, beta) (predicted)    | Agpat2_predicted | 0.912     | 0.761 | 1.606      | 0.067 | 0.687      | 0.140 | 1.193       | 0.093 |
| 1382041_at   | BI290161  | 1-acylglycerol-3-phosphate O-acyltransferase 3 (predicted)                                                  | Agpat3_predicted | 0.463     | 0.030 | 0.552      | 0.424 | 0.385      | 0.122 | 0.478       | 0.189 |
| 1380480_at   | AI711263  | 1-acylglycerol-3-phosphate O-acyltransferase 3 (predicted)                                                  | Agpat3_predicted | 0.998     | 0.984 | 0.967      | 0.965 | 0.999      | 0.995 | 0.999       | 0.995 |
| 1368194_at   | NM_133406 | 1-acylglycerol-3-phosphate O-acyltransferase 4 (lysophosphatidic acid acyltransferase, delta)               | Agpat4           | 1.335     | 0.456 | 2.211      | 0.000 | 1.063      | 0.258 | 1.803       | 0.004 |
| 1378284_at   | BI292067  | 1-acylglycerol-3-phosphate O-acyltransferase 5 (lysophosphatidic acid acyltransferase, epsilon) (predicted) | Agpat5_predicted | 0.976     | 0.159 | 0.345      | 0.023 | 0.728      | 0.077 | 0.494       | 0.183 |
| 1373169_at   | AI175416  | 1-acylglycerol-3-phosphate O-acyltransferase 5 (lysophosphatidic acid acyltransferase, epsilon) (predicted) | Agpat5_predicted | 1.034     | 0.917 | 0.881      | 0.199 | 0.878      | 0.933 | 0.971       | 0.564 |
| 1390966_at   | BE111759  | 1-acylglycerol-3-phosphate O-acyltransferase 6 (lysophosphatidic acid acyltransferase, zeta)                | Agpat6           | 1.126     | 0.399 | 0.440      | 0.012 | 1.780      | 0.348 | 0.893       | 0.379 |
| 1384383_at   | BF557230  | 1-acylglycerol-3-phosphate O-acyltransferase 6 (lysophosphatidic acid acyltransferase, zeta)                | Agpat6           | 1.003     | 0.874 | 0.997      | 0.992 | 0.998      | 0.882 | 0.999       | 0.992 |
| 1391754_at   | BM391818  | 2'-5' oligoadenylate synthetase 1I                                                                          | Oas1i            | 5.638     | 0.000 | 2.784      | 0.008 | 7.759      | 0.000 | 4.644       | 0.002 |
| 1388544_at   | BI294941  | 2,3-bisphosphoglycerate mutase                                                                              | Bpgm             | 2.394     | 0.018 | 1.420      | 0.172 | 3.097      | 0.004 | 1.997       | 0.005 |
| 1367777_at   | NM_057197 | 2,4-dienoyl CoA reductase 1, mitochondrial                                                                  | Decr1            | 0.452     | 0.013 | 0.357      | 0.000 | 0.404      | 0.027 | 0.445       | 0.000 |
| 1371152_a_at | Z18877    | 2',5'-oligoadenylate synthetase 1, 40/46kDa                                                                 | Oas1             | 9.701     | 0.038 | 6.207      | 0.001 | 41.425     | 0.001 | 13.217      | 0.002 |
| 1372012_at   | BF417479  | 24-dehydrocholesterol reductase                                                                             | Dhcr24           | 0.278     | 0.048 | 0.900      | 0.036 | 0.470      | 0.085 | 0.687       | 0.013 |
| 1370818_at   | AF044574  | 2-4-dienoyl-Coenzyme A reductase 2, peroxisomal                                                             | Decr2            | 0.655     | 0.003 | 0.787      | 0.109 | 0.778      | 0.073 | 0.809       | 0.253 |
| 1388056_at   | AF068268  | 2-5 oligoadenylate synthetase 1B                                                                            | Oas1b            | 7.331     | 0.003 | 2.070      | 0.039 | 23.474     | 0.000 | 6.535       | 0.010 |
| 1377497_at   | BF419319  | 2'-5' oligoadenylate synthetase-like 1                                                                      | Oas1l            | 8.938     | 0.052 | 1.956      | 0.034 | 41.181     | 0.000 | 17.648      | 0.000 |
| 1391755_at   | AI535177  | 3-hydroxy-3-methylglutaryl-Coenzyme A lyase                                                                 | Hmgcl            | 1.020     | 0.311 | 0.999      | 0.993 | 1.007      | 0.373 | 1.000       | 0.933 |
| 1367767_at   | NM_024386 | 3-hydroxy-3-methylglutaryl-Coenzyme A lyase                                                                 | Hmgcl            | 1.244     | 0.996 | 1.322      | 0.210 | 0.401      | 0.022 | 1.141       | 0.221 |
| 1375852_at   | BM390399  | 3-hydroxy-3-methylglutaryl-Coenzyme A reductase                                                             | Hmgcr            | 0.684     | 0.057 | 0.818      | 0.032 | 0.779      | 0.382 | 0.677       | 0.010 |
| 1387848_at   | NM_013134 | 3-hydroxy-3-methylglutaryl-Coenzyme A reductase                                                             | Hmgcr            | 0.702     | 0.132 | 0.590      | 0.024 | 0.589      | 0.105 | 0.809       | 0.056 |
| 1367932_at   | NM_017268 | 3-hydroxy-3-methylglutaryl-Coenzyme A synthase 1                                                            | Hmgcs1           | 0.851     | 0.289 | 0.572      | 0.015 | 0.879      | 0.747 | 0.581       | 0.048 |
| 1382260_at   | AW531471  | 3-hydroxybutyrate dehydrogenase, type 1                                                                     | Bdh1             | 0.999     | 0.726 | 0.702      | 0.141 | 1.036      | 0.849 | 0.781       | 0.318 |
| 1388118_at   | AI176586  | 3-hydroxyisobutyrate dehydrogenase                                                                          | Hibadh           | 0.548     | 0.001 | 0.897      | 0.117 | 0.474      | 0.044 | 0.687       | 0.076 |
| 1373564_at   | AI410548  | 3-hydroxyisobutyryl-Coenzyme A hydrolase                                                                    | Hibch            | 0.940     | 0.762 | 1.502      | 0.172 | 0.411      | 0.035 | 1.156       | 0.505 |
| 1371850_at   | AA892829  | 3'-phosphoadenosine 5'-phosphosulfate synthase 1 (predicted)                                                | Papss1_predicted | 0.466     | 0.020 | 0.729      | 0.001 | 0.583      | 0.063 | 0.699       | 0.071 |
| 1370052_at   | NM_031081 | 3-phosphoinositide dependent protein kinase-1                                                               | Pdpk1            | 1.108     | 0.886 | 0.805      | 0.912 | 0.972      | 0.146 | 0.742       | 0.241 |
| 1369799_at   | U29701    | 4-aminobutyrate aminotransferase                                                                            | Abat             | 0.538     | 0.014 | 0.631      | 0.018 | 0.590      | 0.086 | 0.512       | 0.109 |
| 1375321_at   | BF393840  | 4-aminobutyrate aminotransferase                                                                            | Abat             | 0.901     | 0.081 | 0.987      | 0.902 | 0.899      | 0.765 | 0.889       | 0.617 |
| 1391365_at   | BF416465  | 4-aminobutyrate aminotransferase                                                                            | Abat             | 0.953     | 0.757 | 0.401      | 0.007 | 1.807      | 0.522 | 0.428       | 0.064 |
| 1388537_at   | BF554891  | 4-nitrophenylphosphatase domain and non-neuronal SNAP25-like protein homolog 1 (C. elegans)                 | Nipsnap1         | 0.611     | 0.257 | 0.732      | 0.031 | 0.828      | 0.841 | 0.687       | 0.217 |
| 1390454_at   | BI289807  | 4-nitrophenylphosphatase domain and non-neuronal SNAP25-like protein homolog 1 (C. elegans)                 | Nipsnap1         | 0.936     | 0.978 | 0.835      | 0.038 | 0.827      | 0.344 | 0.832       | 0.334 |
| 1384112_at   | BI289470  | 5' nucleotidase, ecto                                                                                       | Nt5e             | 1.719     | 0.053 | 0.760      | 0.198 | 0.708      | 0.317 | 0.788       | 0.704 |
| 1369200_at   | NM_021576 | 5' nucleotidase, ecto                                                                                       | Nt5e             | 0.964     | 0.446 | 1.111      | 0.830 | 0.972      | 0.840 | 0.939       | 0.759 |
| 1392719_at   | AA957588  | 5,10-methenyltetrahydrofolate synthetase (5-formyltetrahydrofolate cyclo-ligase)                            | Mthfs            | 0.848     | 0.793 | 1.349      | 0.039 | 0.702      | 0.083 | 1.409       | 0.132 |
| 1384370_at   | BF542664  | 5,10-methenyltetrahydrofolate synthetase (5-formyltetrahydrofolate cyclo-ligase)                            | Mthfs            | 1.002     | 0.918 | 1.500      | 0.033 | 0.843      | 0.172 | 1.118       | 0.022 |
| 1381768_at   | AW535082  | 5,10-methenyltetrahydrofolate synthetase (5-formyltetrahydrofolate cyclo-ligase)                            | Mthfs            | 1.024     | 0.945 | 2.303      | 0.006 | 0.845      | 0.270 | 2.034       | 0.009 |
| 1385254_at   | BE104427  | 5'-3' exoribonuclease 1 (predicted)                                                                         | Xrm1_predicted   | 1.178     | 0.011 | 1.010      | 0.971 | 0.997      | 0.545 | 0.998       | 0.829 |
| 1391107_at   | BI275784  | 5'-3' exoribonuclease 1 (predicted)                                                                         | Xrm1_predicted   | 4.020     | 0.019 | 1.789      | 0.061 | 3.504      | 0.030 | 2.692       | 0.048 |
| 1378759_at   | BE102644  | 5'-3' exoribonuclease 1 (predicted)                                                                         | Xrm1_predicted   | 2.006     | 0.020 | 1.458      | 0.052 | 1.636      | 0.163 | 1.193       | 0.070 |
| 1391412_at   | AA996841  | 5'-3' exoribonuclease 2 (predicted)                                                                         | Xrm2_predicted   | 1.103     | 0.711 | 2.564      | 0.005 | 1.377      | 0.025 | 1.828       | 0.004 |
| 1393702_at   | BF397290  | 5'-3' exoribonuclease 2 (predicted)                                                                         | Xrm2_predicted   | 0.911     | 0.884 | 1.343      | 0.069 | 1.223      | 0.167 | 1.214       | 0.107 |
| 1369962_at   | NM_031014 | 5-aminoimidazole-4-carboxamide ribonucleotide formyltransferase/IMP cyclohydrolase                          | Atic             | 0.499     | 0.243 | 1.616      | 0.011 | 0.513      | 0.002 | 1.677       | 0.004 |
| 1388631_at   | AI177093  | 5-azacytidine induced gene 2                                                                                | Azi2             | 1.619     | 0.108 | 1.905      | 0.030 | 2.267      | 0.002 | 1.654       | 0.061 |
| 1369456_at   | NM_017250 | 5-hydroxytryptamine (serotonin) receptor 2B                                                                 | Htr2b            | 0.991     | 0.604 | 0.996      | 0.286 | 1.452      | 0.118 | 1.015       | 0.043 |
| 1388219_at   | L10073    | 5-hydroxytryptamine (serotonin) receptor 5B                                                                 | Htr5b            | 0.919     | 0.550 | 0.936      | 0.387 | 1.001      | 0.221 | 0.940       | 0.343 |
| 1387545_at   | NM_030864 | 5-methyltetrahydrofolate-homocysteine methyltransferase                                                     | Mtr              | 1.122     | 0.862 | 2.146      | 0.015 | 0.861      | 0.614 | 1.417       | 0.871 |
| 1398642_at   | BI279274  | 5-methyltetrahydrofolate-homocysteine methyltransferase reductase                                           | Mtrr             | 0.728     | 0.059 | 1.250      | 0.275 | 1.481      | 0.670 | 0.656       | 0.067 |
| 1384423_at   | AW140661  | 5'-nucleotidase, cytosolic II (predicted)                                                                   | Nt5c2_predicted  | 0.398     | 0.087 | 0.671      | 0.073 | 0.507      | 0.086 | 0.791       | 0.026 |
| 1373412_at   | AI409146  | 5'-nucleotidase, cytosolic III (predicted)                                                                  | Nt5c3_predicted  | 1.083     | 0.726 | 0.494      | 0.007 | 3.082      | 0.001 | 1.222       | 0.048 |
| 1389131_at   | BF412799  | 5'-nucleotidase, cytosolic III-like                                                                         | Nt5c3l           | 0.797     | 0.178 | 0.662      | 0.369 | 0.642      | 0.726 | 0.788       | 0.290 |
| 1391306_at   | AI070952  | 5-oxoprolinase (ATP-hydrolysing)                                                                            | Oplah            | 0.630     | 0.395 | 1.169      | 0.436 | 0.412      | 0.048 | 0.973       | 0.904 |
| 1378976_x_at | AI070952  | 5-oxoprolinase (ATP-hydrolysing)                                                                            | Oplah            | 0.714     | 0.465 | 1.136      | 0.324 | 0.425      | 0.009 | 1.078       | 0.192 |
| 1388044_at   | L27084    | 6-phosphofructo-2-kinase/fructose-2,6-biphosphatase 2                                                       | Pfkfb2           | 1.131     | 0.142 | 0.516      | 0.001 | 0.959      | 0.448 | 0.490       | 0.023 |
| 1382712_at   | AI044245  | 6-phosphofructo-2-kinase/fructose-2,6-biphosphatase 2                                                       | Pfkfb2           | 0.790     | 0.512 | 0.510      | 0.012 | 0.676      | 0.171 | 0.283       | 0.002 |
| 1374523_at   | AI231339  | 6-phosphogluconolactonase (predicted)                                                                       | Pgls_predicted   | 0.645     | 0.097 | 0.597      | 0.248 | 0.633      | 0.352 | 0.484       | 0.017 |
| 1369304_at   | NM_017220 | 6-pyruvoyl-tetrahydropterin synthase                                                                        | Pts              | 1.000     | 0.626 | 0.992      | 0.828 | 0.997      | 0.984 | 0.981       | 0.646 |

|              |           |                                                                                                                              |                  |        |       |        |       |        |       |        |       |
|--------------|-----------|------------------------------------------------------------------------------------------------------------------------------|------------------|--------|-------|--------|-------|--------|-------|--------|-------|
| 1368189_at   | NM_022389 | 7-dehydrocholesterol reductase                                                                                               | Dhcr7            | 0.697  | 0.083 | 0.955  | 0.490 | 0.487  | 0.383 | 0.794  | 0.185 |
| 1370040_at   | NM_030870 | 8-oxoguanine DNA-glycosylase 1                                                                                               | Ogg1             | 0.947  | 0.627 | 0.997  | 0.991 | 0.674  | 0.659 | 0.999  | 0.980 |
| 1371420_at   | AI412054  | 92Aa-Protein                                                                                                                 | LOC494529        | 0.633  | 0.048 | 0.670  | 0.247 | 0.590  | 0.208 | 0.616  | 0.235 |
| 1387135_at   | NM_020308 | a disintegrin and metallopeptidase domain 15 (metargidin)                                                                    | Adam15           | 0.780  | 0.079 | 0.387  | 0.021 | 0.640  | 0.118 | 0.243  | 0.041 |
| 1387256_at   | NM_020078 | a disintegrin and metallopeptidase domain 1a                                                                                 | Adam1a           | 1.001  | 0.433 | 0.981  | 0.590 | 0.972  | 0.607 | 0.700  | 0.134 |
| 1388161_at   | BI300565  | a disintegrin and metalloprotease domain 10                                                                                  | Adam10           | 0.983  | 0.249 | 0.791  | 0.086 | 1.044  | 0.481 | 0.848  | 0.105 |
| 1369833_at   | NM_020077 | a disintegrin and metalloprotease domain 2                                                                                   | Adam2            | 1.261  | 0.872 | 1.154  | 0.241 | 2.816  | 0.030 | 1.018  | 0.448 |
| 1369832_at   | NM_020302 | a disintegrin and metalloprotease domain 3 (cyritestin)                                                                      | Adam3            | 1.099  | 0.820 | 1.167  | 0.942 | 1.247  | 0.278 | 1.112  | 0.978 |
| 1394612_at   | AW535206  | A disintegrin and metalloprotease domain 4                                                                                   | Adam4            | 0.934  | 0.534 | 0.438  | 0.011 | 1.225  | 0.272 | 0.754  | 0.041 |
| 1390046_at   | BI288110  | a disintegrin and metalloprotease domain 8 (predicted)                                                                       | Adam8_predicted  | 0.826  | 0.725 | 5.739  | 0.000 | 1.163  | 0.775 | 1.259  | 0.208 |
| 1367922_at   | NM_020306 | a disintegrin and metalloproteinase domain 17 (tumor necrosis factor, alpha, converting enzyme)                              | Adam17           | 3.586  | 0.000 | 2.035  | 0.004 | 3.598  | 0.001 | 2.089  | 0.022 |
| 1375337_at   | AI011712  | a disintegrin and metalloproteinase domain 9 (meltrin gamma) (predicted)                                                     | Adam9_predicted  | 1.376  | 0.441 | 0.551  | 0.081 | 1.499  | 0.327 | 0.577  | 0.061 |
| 1394518_at   | BF284436  | A disintegrin-like and metalloprotease (reprolysin type) with thrombospondin type 1 motif, 9 (predicted)                     | Adamt9_predicted | 0.797  | 0.115 | 0.953  | 0.952 | 1.330  | 0.774 | 1.001  | 0.979 |
| 1368869_at   | BG663107  | A kinase (PRKA) anchor protein (gravin) 12                                                                                   | Akap12           | 13.725 | 0.000 | 3.964  | 0.016 | 17.530 | 0.000 | 3.450  | 0.008 |
| 1368868_at   | NM_057103 | A kinase (PRKA) anchor protein (gravin) 12                                                                                   | Akap12           | 1.980  | 0.008 | 0.991  | 0.077 | 1.445  | 0.345 | 1.002  | 0.155 |
| 1383151_at   | AI011474  | A kinase (PRKA) anchor protein (yotiao) 9                                                                                    | Akap9            | 1.452  | 0.223 | 0.716  | 0.105 | 1.266  | 0.896 | 0.866  | 0.140 |
| 1384857_at   | AI145240  | A kinase (PRKA) anchor protein (yotiao) 9                                                                                    | Akap9            | 0.973  | 0.972 | 0.966  | 0.433 | 1.102  | 0.596 | 0.715  | 0.231 |
| 1383358_at   | AI072577  | A kinase (PRKA) anchor protein 1                                                                                             | Akap1            | 1.533  | 0.339 | 2.037  | 0.002 | 1.234  | 0.788 | 1.576  | 0.004 |
| 1395278_at   | BI299865  | A kinase (PRKA) anchor protein 10 (predicted)                                                                                | Akap10_predicted | 1.614  | 0.976 | 1.350  | 0.051 | 1.013  | 0.963 | 1.535  | 0.008 |
| 1368427_at   | NM_012773 | A kinase (PRKA) anchor protein 11                                                                                            | Akap11           | 1.208  | 0.157 | 1.204  | 0.242 | 1.119  | 0.157 | 1.220  | 0.071 |
| 1390883_at   | AI501759  | A kinase (PRKA) anchor protein 11                                                                                            | Akap11           | 0.834  | 0.274 | 0.311  | 0.003 | 0.864  | 0.485 | 0.591  | 0.026 |
| 1392049_at   | BF411767  | A kinase (PRKA) anchor protein 11                                                                                            | Akap11           | 0.921  | 0.753 | 0.685  | 0.113 | 1.240  | 0.674 | 0.617  | 0.049 |
| 1381842_at   | AI511309  | A kinase (PRKA) anchor protein 13                                                                                            | Akap13           | 0.699  | 0.321 | 0.887  | 0.940 | 1.084  | 0.253 | 1.098  | 0.145 |
| 1382268_at   | AW526712  | A kinase (PRKA) anchor protein 13                                                                                            | Akap13           | 0.778  | 0.525 | 0.470  | 0.058 | 0.748  | 0.187 | 0.581  | 0.011 |
| 1386521_at   | AI511291  | A kinase (PRKA) anchor protein 2                                                                                             | Akap2            | 3.138  | 0.041 | 1.984  | 0.058 | 18.776 | 0.000 | 10.157 | 0.012 |
| 1382206_a_at | BF398063  | A kinase (PRKA) anchor protein 2                                                                                             | Akap2            | 1.151  | 0.181 | 0.993  | 0.882 | 16.586 | 0.000 | 1.560  | 0.354 |
| 1391548_at   | AA955786  | A kinase (PRKA) anchor protein 5                                                                                             | Akap5            | 2.089  | 0.009 | 0.932  | 0.600 | 1.776  | 0.001 | 0.698  | 0.236 |
| 1380914_at   | AI175405  | A kinase (PRKA) anchor protein 5                                                                                             | Akap5            | 1.312  | 0.152 | 1.328  | 0.073 | 1.827  | 0.050 | 1.508  | 0.128 |
| 1378880_at   | AW532591  | A kinase (PRKA) anchor protein 5                                                                                             | Akap5            | 1.542  | 0.397 | 1.277  | 0.046 | 1.815  | 0.065 | 1.636  | 0.003 |
| 1381619_at   | BE116003  | A kinase (PRKA) anchor protein 5                                                                                             | Akap5            | 1.338  | 0.707 | 1.133  | 0.856 | 1.257  | 0.242 | 1.019  | 0.376 |
| 1389496_at   | BI300893  | A kinase (PRKA) anchor protein 7                                                                                             | Akap7            | 0.347  | 0.033 | 0.719  | 0.015 | 0.259  | 0.003 | 0.579  | 0.074 |
| 1392079_at   | AW526264  | A kinase (PRKA) anchor protein 7                                                                                             | Akap7            | 0.852  | 0.099 | 0.843  | 0.588 | 0.847  | 0.448 | 0.662  | 0.536 |
| 1370911_at   | U01914    | A kinase (PRKA) anchor protein 8                                                                                             | Akap8            | 0.804  | 0.047 | 0.992  | 0.667 | 1.024  | 0.181 | 1.018  | 0.448 |
| 1385713_at   | BF392577  | A kinase (PRKA) anchor protein 8-like                                                                                        | Akap8l           | 0.521  | 0.303 | 0.589  | 0.148 | 1.004  | 0.829 | 0.583  | 0.015 |
| 1375813_at   | BE102687  | A kinase (PRKA) anchor protein 8-like                                                                                        | Akap8l           | 1.029  | 0.711 | 1.857  | 0.194 | 1.023  | 0.369 | 0.943  | 0.614 |
| 1390375_at   | BF414692  | A kinase (PRKA) anchor protein 8-like                                                                                        | Akap8l           | 0.980  | 0.805 | 0.769  | 0.100 | 0.985  | 0.907 | 0.654  | 0.051 |
| 1376720_at   | BG376414  | aarF domain containing kinase 2 (predicted)                                                                                  | Adck2_predicted  | 0.770  | 0.515 | 0.816  | 0.263 | 0.789  | 0.038 | 0.876  | 0.150 |
| 1389043_at   | AI101347  | aarF domain containing kinase 4                                                                                              | Adck4            | 1.646  | 0.519 | 3.266  | 0.004 | 1.339  | 0.450 | 1.645  | 0.047 |
| 1398194_at   | BF405720  | AarF domain containing kinase 4                                                                                              | Adck4            | 1.217  | 0.769 | 0.966  | 0.354 | 1.295  | 0.187 | 1.003  | 0.997 |
| 1374746_at   | AA891922  | Ab1-152                                                                                                                      | LOC500877        | 1.496  | 0.005 | 1.519  | 0.001 | 1.485  | 0.005 | 1.992  | 0.010 |
| 1385397_at   | AA859085  | Ab1-219                                                                                                                      | LOC499991        | 17.424 | 0.000 | 2.444  | 0.000 | 16.680 | 0.000 | 1.471  | 0.359 |
| 1390662_at   | AW435169  | Ab2-427                                                                                                                      | LOC500084        | 2.378  | 0.003 | 1.957  | 0.003 | 2.508  | 0.001 | 2.069  | 0.002 |
| 1382981_at   | AI138017  | Abelson helper integration site 1                                                                                            | Ahi1             | 0.349  | 0.022 | 0.529  | 0.076 | 0.420  | 0.111 | 0.705  | 0.261 |
| 1379594_at   | AW524408  | Abelson helper integration site 1                                                                                            | Ahi1             | 0.937  | 0.671 | 0.995  | 0.956 | 1.005  | 0.258 | 1.017  | 0.860 |
| 1372976_at   | BI294842  | abhydrolase domain containing 14A                                                                                            | Abhd14a          | 0.995  | 0.970 | 0.955  | 0.528 | 0.738  | 0.960 | 0.958  | 0.532 |
| 1377900_at   | BF409560  | abhydrolase domain containing 14b                                                                                            | Abhd14b          | 0.939  | 0.130 | 0.464  | 0.012 | 0.623  | 0.326 | 0.365  | 0.021 |
| 1388988_at   | AI175070  | abhydrolase domain containing 14b                                                                                            | Abhd14b          | 0.660  | 0.800 | 0.389  | 0.001 | 0.557  | 0.124 | 0.420  | 0.015 |
| 1390455_at   | AI013474  | abhydrolase domain containing 2 (predicted)                                                                                  | Abhd2_predicted  | 6.338  | 0.025 | 20.377 | 0.000 | 1.159  | 0.656 | 7.093  | 0.001 |
| 1382137_at   | BG662490  | abhydrolase domain containing 3 (predicted)                                                                                  | Abhd3_predicted  | 0.962  | 0.825 | 0.500  | 0.001 | 0.900  | 0.345 | 0.571  | 0.036 |
| 1393028_at   | BM383152  | Abhydrolase domain containing 4 (predicted)                                                                                  | Abhd4_predicted  | 0.669  | 0.010 | 1.152  | 0.518 | 0.398  | 0.002 | 1.632  | 0.098 |
| 1399019_at   | AI407868  | abhydrolase domain containing 4 (predicted)                                                                                  | Abhd4_predicted  | 0.297  | 0.166 | 1.328  | 0.112 | 0.397  | 0.023 | 1.673  | 0.067 |
| 1390155_at   | AA924793  | abhydrolase domain containing 6                                                                                              | Abhd6            | 1.315  | 0.062 | 1.344  | 0.011 | 0.875  | 0.277 | 1.210  | 0.013 |
| 1380332_at   | BF411794  | Abhydrolase domain containing 6                                                                                              | Abhd6            | 1.934  | 0.084 | 0.539  | 0.105 | 1.110  | 0.702 | 0.422  | 0.067 |
| 1393197_at   | BG376055  | abhydrolase domain containing 8 (predicted)                                                                                  | Abhd8_predicted  | 0.970  | 0.749 | 0.553  | 0.031 | 0.997  | 0.926 | 0.554  | 0.014 |
| 1367958_at   | NM_024397 | abl-interactor 1                                                                                                             | Abi1             | 1.054  | 0.498 | 1.292  | 0.229 | 1.479  | 0.071 | 1.559  | 0.066 |
| 1383147_at   | AW526373  | Abl-interactor 2                                                                                                             | Abi2             | 0.583  | 0.039 | 0.167  | 0.000 | 0.770  | 0.224 | 0.352  | 0.030 |
| 1393031_at   | BI297075  | ABO blood group (transferase A, alpha 1-3-N-acetylgalactosaminyltransferase; transferase B, alpha 1-3-galactosyltransferase) | Abo              | 0.753  | 0.105 | 0.898  | 0.353 | 0.753  | 0.097 | 0.899  | 0.359 |
| 1375036_at   | AI172146  | Ac1158                                                                                                                       | LOC302898        | 0.722  | 0.000 | 0.597  | 0.012 | 0.780  | 0.044 | 0.802  | 0.322 |
| 1394397_at   | BF522734  | Ac1158                                                                                                                       | LOC302898        | 0.724  | 0.043 | 1.215  | 0.437 | 0.413  | 0.004 | 1.178  | 0.498 |
| 1385212_at   | AI603192  | Ac1158                                                                                                                       | LOC302898        | 0.637  | 0.568 | 0.462  | 0.096 | 0.945  | 0.740 | 0.987  | 0.962 |

|              |           |                                                                                                                                       |                                                 |       |       |       |       |       |       |       |       |
|--------------|-----------|---------------------------------------------------------------------------------------------------------------------------------------|-------------------------------------------------|-------|-------|-------|-------|-------|-------|-------|-------|
| 1383607_at   | BG377487  | Ac1158                                                                                                                                | LOC302898                                       | 1.076 | 0.657 | 0.346 | 0.000 | 1.134 | 0.751 | 0.766 | 0.245 |
| 1397100_at   | BF403835  | Ac1258                                                                                                                                | LOC361230                                       | 1.055 | 0.258 | 1.918 | 0.056 | 1.002 | 0.846 | 1.001 | 0.955 |
| 1371405_at   | BE109143  | Ac2-193                                                                                                                               | ---                                             | 0.442 | 0.466 | 0.617 | 0.000 | 0.619 | 0.113 | 0.736 | 0.011 |
| 1385889_at   | AA893212  | Ac2-193                                                                                                                               | ---                                             | 0.988 | 0.992 | 0.461 | 0.091 | 1.000 | 1.000 | 0.453 | 0.081 |
| 1368126_at   | NM_023104 | acetoacetyl-CoA synthetase                                                                                                            | Aacs                                            | 1.362 | 0.335 | 0.750 | 0.080 | 1.386 | 0.988 | 0.573 | 0.026 |
| 1367763_at   | D13921    | acetyl-coenzyme A acetyltransferase 1                                                                                                 | Acat1                                           | 0.471 | 0.002 | 0.303 | 0.001 | 0.589 | 0.016 | 0.229 | 0.001 |
| 1383416_at   | AA899304  | Acetyl-coenzyme A acetyltransferase 1                                                                                                 | Acat1                                           | 0.322 | 0.010 | 0.358 | 0.006 | 0.390 | 0.117 | 0.345 | 0.003 |
| 1376226_at   | BG377636  | Acetyl-Coenzyme A acetyltransferase 2                                                                                                 | Acat2                                           | 0.738 | 0.243 | 0.839 | 0.944 | 0.710 | 0.091 | 0.913 | 0.196 |
| 1372462_at   | AI412322  | acetyl-Coenzyme A acetyltransferase 2                                                                                                 | Acat2                                           | 0.913 | 0.742 | 1.203 | 0.178 | 0.838 | 0.192 | 0.970 | 0.637 |
| 1387783_a_at | NM_012489 | acetyl-Coenzyme A acyltransferase 1 /// similar to 3-ketoacyl-CoA thiolase B, peroxisomal precursor (Beta-ketothiolase B) (predicted) | Acaa1 ///<br>RGD1562373_predicted               | 0.967 | 0.883 | 0.620 | 0.048 | 0.972 | 0.890 | 0.853 | 0.059 |
| 1386880_at   | NM_130433 | acetyl-Coenzyme A acyltransferase 2 (mitochondrial 3-oxoacyl-Coenzyme A thiolase)                                                     | Acaa2                                           | 0.610 | 0.424 | 0.422 | 0.105 | 0.551 | 0.028 | 0.362 | 0.036 |
| 1370893_at   | BI296153  | acetyl-coenzyme A carboxylase alpha                                                                                                   | Acaca                                           | 0.629 | 0.161 | 1.000 | 0.721 | 1.169 | 0.461 | 0.998 | 0.750 |
| 1367735_at   | NM_012819 | acetyl-Coenzyme A dehydrogenase, long-chain                                                                                           | Acadl                                           | 0.908 | 0.997 | 1.555 | 0.044 | 0.631 | 0.232 | 1.405 | 0.057 |
| 1367702_at   | NM_016986 | acetyl-Coenzyme A dehydrogenase, medium chain                                                                                         | Acadm                                           | 0.307 | 0.011 | 0.444 | 0.032 | 0.865 | 0.681 | 0.521 | 0.041 |
| 1367828_at   | NM_022512 | acetyl-Coenzyme A dehydrogenase, short chain                                                                                          | Acads                                           | 0.466 | 0.053 | 0.621 | 0.198 | 0.483 | 0.081 | 0.695 | 0.291 |
| 1372228_at   | BF420745  | acetylserotonin O-methyltransferase-like (predicted)                                                                                  | Asmtl_predicted                                 | 0.562 | 0.305 | 0.719 | 0.151 | 0.953 | 0.619 | 0.572 | 0.392 |
| 1376037_at   | BF283385  | achalasia, adrenocortical insufficiency, alacrimia (Allgrove, triple-A) (predicted)                                                   | Aaas_predicted                                  | 0.920 | 0.965 | 1.009 | 0.933 | 1.001 | 0.995 | 1.593 | 0.026 |
| 1398938_at   | AI170780  | acid phosphatase 1, soluble                                                                                                           | Acp1                                            | 0.703 | 0.010 | 1.516 | 0.001 | 0.674 | 0.025 | 1.553 | 0.027 |
| 1387840_at   | NM_021262 | acid phosphatase 1, soluble                                                                                                           | Acp1                                            | 0.708 | 0.635 | 1.310 | 0.019 | 0.604 | 0.545 | 1.080 | 0.685 |
| 1367906_at   | NM_016988 | acid phosphatase 2, lysosomal                                                                                                         | Acp2                                            | 0.629 | 0.086 | 0.916 | 0.052 | 0.486 | 0.066 | 0.755 | 0.047 |
| 1373732_at   | BM386224  | acid phosphatase 6, lysophosphatidic                                                                                                  | Acp6                                            | 0.927 | 0.668 | 0.730 | 0.010 | 0.928 | 0.747 | 0.745 | 0.000 |
| 1389229_at   | AI113146  | acid phosphatase-like 2                                                                                                               | Acpl2                                           | 0.582 | 0.248 | 0.516 | 0.033 | 0.655 | 0.181 | 0.702 | 0.034 |
| 1369063_at   | NM_012903 | acidic (leucine-rich) nuclear phosphoprotein 32 family, member A                                                                      | Anp32a                                          | 0.551 | 0.211 | 2.050 | 0.273 | 0.514 | 0.031 | 1.714 | 0.462 |
| 1372620_at   | AI008642  | acidic (leucine-rich) nuclear phosphoprotein 32 family, member E                                                                      | Anp32e                                          | 0.841 | 0.141 | 1.883 | 0.003 | 0.913 | 0.541 | 1.662 | 0.005 |
| 1371873_at   | AA850735  | Acidic (leucine-rich) nuclear phosphoprotein 32 family, member E                                                                      | Anp32e                                          | 0.612 | 0.413 | 0.457 | 0.002 | 0.662 | 0.109 | 0.580 | 0.010 |
| 1386915_at   | NM_131911 | acidic nuclear phosphoprotein 32 family, member B                                                                                     | Anp32b                                          | 0.607 | 0.612 | 2.058 | 0.006 | 0.596 | 0.022 | 1.730 | 0.001 |
| 1367560_at   | NM_022402 | acidic ribosomal phosphoprotein P0                                                                                                    | Arbp                                            | 0.892 | 0.574 | 1.151 | 0.073 | 0.724 | 0.053 | 0.987 | 0.879 |
| 1389363_at   | AA997430  | acireductone dioxygenase 1                                                                                                            | Adi1                                            | 0.510 | 0.251 | 0.541 | 0.013 | 0.614 | 0.010 | 0.562 | 0.011 |
| 1372847_at   | AW524458  | ACN9 homolog (S. cerevisiae)                                                                                                          | Acn9                                            | 0.558 | 0.449 | 1.512 | 0.390 | 0.680 | 0.262 | 1.290 | 0.180 |
| 1386916_at   | NM_017321 | aconitase 1                                                                                                                           | Aco1                                            | 0.228 | 0.009 | 0.413 | 0.000 | 0.377 | 0.019 | 0.558 | 0.038 |
| 1367589_at   | NM_024398 | aconitase 2, mitochondrial                                                                                                            | Aco2                                            | 0.446 | 0.090 | 0.614 | 0.001 | 0.532 | 0.005 | 0.565 | 0.004 |
| 1378945_at   | AI638990  | Aconitase 2, mitochondrial                                                                                                            | Aco2                                            | 1.471 | 0.285 | 1.313 | 0.188 | 1.108 | 0.863 | 1.497 | 0.060 |
| 1396474_at   | AW254078  | Acrosin binding protein                                                                                                               | Acrbp                                           | 0.944 | 0.934 | 0.824 | 0.488 | 1.002 | 0.995 | 0.774 | 0.717 |
| 1370856_at   | AA800705  | actin alpha cardiac 1                                                                                                                 | Actc1                                           | 1.005 | 0.375 | 1.017 | 0.995 | 1.008 | 0.343 | 0.998 | 0.846 |
| 1398779_at   | NM_031146 | actin related protein 2/3 complex, subunit 1A                                                                                         | Arpc1a                                          | 0.935 | 0.966 | 0.743 | 0.022 | 0.886 | 0.254 | 0.787 | 0.011 |
| 1386925_at   | NM_019289 | actin related protein 2/3 complex, subunit 1B                                                                                         | Arpc1b                                          | 1.014 | 0.399 | 1.110 | 0.375 | 0.804 | 0.074 | 1.016 | 0.498 |
| 1371511_at   | AI009775  | actin related protein 2/3 complex, subunit 2 (predicted)                                                                              | Arpc2_predicted                                 | 0.998 | 0.254 | 1.181 | 0.014 | 0.872 | 0.835 | 1.174 | 0.075 |
| 1371977_at   | BG381477  | actin related protein 2/3 complex, subunit 3 (predicted)                                                                              | Arpc3_predicted                                 | 0.871 | 0.946 | 0.829 | 0.193 | 0.834 | 0.090 | 0.769 | 0.018 |
| 1372577_at   | AI411582  | actin related protein 2/3 complex, subunit 4 (predicted)                                                                              | Arpc4_predicted                                 | 0.845 | 0.783 | 1.043 | 0.122 | 0.793 | 0.016 | 0.977 | 0.187 |
| 1390022_at   | AA946538  | actin related protein 2/3 complex, subunit 5                                                                                          | Arpc5                                           | 1.708 | 0.000 | 1.013 | 0.355 | 1.373 | 0.026 | 0.982 | 0.733 |
| 1371457_at   | BI291468  | Actin related protein 2/3 complex, subunit 5-like                                                                                     | Arpc5l                                          | 0.534 | 0.092 | 0.924 | 0.654 | 0.440 | 0.062 | 1.353 | 0.527 |
| 1398835_at   | NM_031144 | actin, beta                                                                                                                           | Actb                                            | 1.381 | 0.213 | 1.953 | 0.006 | 1.282 | 0.954 | 1.857 | 0.080 |
| 1398836_s_at | NM_031144 | actin, beta                                                                                                                           | Actb                                            | 1.423 | 0.468 | 2.066 | 0.018 | 1.223 | 0.317 | 2.020 | 0.219 |
| 1371327_a_at | BG666668  | actin, gamma, cytoplasmic 1 /// similar to Actin, cytoplasmic 2 (Gamma-actin)                                                         | Actg1 /// LOC295810                             | 1.725 | 0.013 | 4.404 | 0.000 | 1.247 | 0.097 | 3.078 | 0.000 |
| 1384581_at   | BI850151  | actin, gamma, cytoplasmic 1 /// similar to Actin, cytoplasmic 2 (Gamma-actin) /// similar to put. type 5 nonmuscle actin (predicted)  | Actg1 /// LOC295810 ///<br>RGD1563410_predicted | 1.322 | 0.790 | 2.529 | 0.013 | 1.000 | 0.994 | 2.178 | 0.001 |
| 1367962_at   | NM_133424 | actinin alpha 3                                                                                                                       | Actn3                                           | 0.954 | 0.827 | 0.919 | 0.510 | 0.956 | 0.836 | 0.944 | 0.484 |
| 1369942_at   | NM_031675 | actinin alpha 4                                                                                                                       | Actn4                                           | 1.219 | 0.079 | 2.849 | 0.000 | 0.566 | 0.848 | 2.412 | 0.010 |
| 1389189_at   | BF555956  | actinin, alpha 1                                                                                                                      | Actn1                                           | 2.572 | 0.005 | 2.004 | 0.006 | 2.191 | 0.002 | 1.440 | 0.002 |
| 1396539_at   | BE119221  | Actinin, alpha 1                                                                                                                      | Actn1                                           | 1.593 | 0.011 | 1.264 | 0.052 | 1.182 | 0.121 | 1.213 | 0.080 |
| 1398294_at   | NM_031005 | actinin, alpha 1                                                                                                                      | Actn1                                           | 3.668 | 0.098 | 5.427 | 0.012 | 5.164 | 0.309 | 2.167 | 0.035 |
| 1373849_at   | AI102978  | actin-like 6A                                                                                                                         | Actl6a                                          | 0.716 | 0.389 | 0.971 | 0.641 | 0.892 | 0.429 | 0.970 | 0.258 |
| 1379781_at   | BE120508  | Actin-like 6A                                                                                                                         | Actl6a                                          | 1.111 | 0.630 | 0.886 | 0.844 | 0.801 | 0.370 | 0.994 | 0.970 |
| 1382608_at   | BI281712  | actin-like 6B (predicted)                                                                                                             | Actl6b_predicted                                | 0.898 | 0.610 | 0.439 | 0.046 | 0.924 | 0.487 | 0.496 | 0.050 |
| 1382294_at   | AI576111  | Activated leukocyte cell adhesion molecule                                                                                            | Alcam                                           | 3.015 | 0.001 | 0.885 | 0.502 | 3.065 | 0.001 | 0.890 | 0.132 |
| 1370043_at   | NM_031753 | activated leukocyte cell adhesion molecule                                                                                            | Alcam                                           | 2.029 | 0.006 | 0.947 | 0.673 | 2.548 | 0.001 | 0.939 | 0.125 |
| 1375263_at   | BI296498  | Activated leukocyte cell adhesion molecule                                                                                            | Alcam                                           | 0.615 | 0.725 | 1.166 | 0.684 | 1.245 | 0.126 | 0.754 | 0.001 |
| 1395981_at   | AW919934  | activating signal cointegrator 1 complex subunit 3 (predicted)                                                                        | Ascc3_predicted                                 | 1.197 | 0.111 | 0.990 | 0.761 | 1.065 | 0.266 | 0.946 | 0.968 |
| 1388354_at   | BE349703  | activating signal cointegrator 1 complex subunit 3-like 1                                                                             | Ascc3l1                                         | 0.951 | 0.139 | 1.367 | 0.109 | 0.932 | 0.520 | 1.405 | 0.008 |
| 1389623_at   | AA849092  | activating transcription factor 1                                                                                                     | Atf1                                            | 1.020 | 0.336 | 1.347 | 0.020 | 0.966 | 0.256 | 1.443 | 0.001 |

|              |           |                                                                            |                  |        |       |        |       |        |       |        |       |
|--------------|-----------|----------------------------------------------------------------------------|------------------|--------|-------|--------|-------|--------|-------|--------|-------|
| 1369472_a_at | NM_031018 | activating transcription factor 2                                          | Atf2             | 0.995  | 0.990 | 3.241  | 0.034 | 1.006  | 0.704 | 1.983  | 0.131 |
| 1369268_at   | NM_012912 | activating transcription factor 3                                          | Atf3             | 15.734 | 0.003 | 53.891 | 0.004 | 23.273 | 0.003 | 26.593 | 0.002 |
| 1367624_at   | NM_024403 | activating transcription factor 4                                          | Atf4             | 1.332  | 0.064 | 2.325  | 0.000 | 1.072  | 0.410 | 2.160  | 0.003 |
| 1372601_at   | BM391471  | activating transcription factor 5                                          | Atf5             | 0.694  | 0.089 | 1.118  | 0.652 | 0.700  | 0.006 | 1.091  | 0.382 |
| 1384957_at   | AI059385  | activating transcription factor 6 (predicted)                              | Atf6_predicted   | 0.834  | 0.976 | 1.846  | 0.227 | 0.978  | 0.999 | 0.998  | 0.990 |
| 1384498_at   | BI274185  | Activating transcription factor 7 (predicted)                              | Atf7_predicted   | 1.142  | 0.778 | 0.902  | 0.491 | 0.721  | 0.051 | 1.027  | 0.848 |
| 1382380_at   | AI176317  | Activating transcription factor 7 (predicted)                              | Atf7_predicted   | 1.001  | 0.996 | 0.941  | 0.765 | 0.999  | 0.279 | 0.957  | 0.841 |
| 1382070_at   | AA819758  | activating transcription factor 7 interacting protein (predicted)          | Atf7ip_predicted | 2.041  | 0.006 | 1.564  | 0.007 | 1.406  | 0.054 | 1.162  | 0.028 |
| 1388601_at   | AI598410  | activator of basal transcription 1                                         | Abt1             | 0.365  | 0.011 | 1.222  | 0.209 | 0.518  | 0.184 | 1.060  | 0.669 |
| 1373215_at   | BI282699  | active BCR-related gene (predicted)                                        | Abr_predicted    | 0.740  | 0.998 | 0.668  | 0.006 | 0.999  | 0.999 | 0.646  | 0.037 |
| 1381220_at   | BM383968  | activin receptor IIA                                                       | Acvr2a           | 1.280  | 0.109 | 2.249  | 0.012 | 0.583  | 0.445 | 2.124  | 0.008 |
| 1376125_at   | BI289112  | Activity and neurotransmitter-induced early gene 11 (ania-11) mRNA, 3' UTR | ---              | 1.651  | 0.057 | 1.729  | 0.038 | 2.002  | 0.026 | 1.008  | 0.964 |
| 1383306_at   | AI013468  | Activity and neurotransmitter-induced early gene 2 (ania-2) mRNA, 3'UTR    | ---              | 0.732  | 0.066 | 0.894  | 0.794 | 0.639  | 0.033 | 0.902  | 0.066 |
| 1389346_at   | BI274136  | activity-dependent neuroprotective protein                                 | Adnp             | 0.464  | 0.026 | 0.235  | 0.016 | 0.540  | 0.025 | 0.395  | 0.005 |
| 1389088_at   | AI600029  | activity-dependent neuroprotective protein                                 | Adnp             | 0.989  | 0.913 | 0.889  | 0.103 | 0.825  | 0.078 | 0.885  | 0.193 |
| 1397389_at   | BF398664  | Activity-dependent neuroprotective protein                                 | Adnp             | 0.979  | 0.934 | 1.023  | 0.066 | 0.674  | 0.184 | 0.840  | 0.106 |
| 1370939_at   | D90109    | acyl-CoA synthetase long-chain family member 1                             | Acs11            | 0.779  | 0.508 | 0.613  | 0.002 | 1.451  | 0.005 | 1.224  | 0.108 |
| 1388153_at   | BI277523  | acyl-CoA synthetase long-chain family member 1                             | Acs11            | 0.972  | 0.858 | 0.981  | 0.393 | 1.753  | 0.264 | 1.462  | 0.680 |
| 1368177_at   | NM_057107 | acyl-CoA synthetase long-chain family member 3                             | Acs13            | 0.784  | 0.108 | 1.917  | 0.005 | 0.510  | 0.038 | 1.341  | 0.127 |
| 1387101_at   | NM_053623 | acyl-CoA synthetase long-chain family member 4                             | Acs14            | 1.538  | 0.275 | 0.844  | 0.164 | 1.388  | 0.340 | 0.885  | 0.203 |
| 1386926_at   | NM_053607 | acyl-CoA synthetase long-chain family member 5                             | Acs15            | 1.669  | 0.011 | 2.354  | 0.000 | 1.413  | 0.042 | 2.167  | 0.000 |
| 1368182_at   | NM_130739 | acyl-CoA synthetase long-chain family member 6                             | Acs16            | 0.679  | 0.177 | 0.367  | 0.013 | 1.099  | 0.471 | 0.498  | 0.040 |
| 1370313_at   | D88891    | acyl-CoA thioesterase 7                                                    | Acot7            | 0.834  | 0.333 | 0.846  | 0.734 | 0.887  | 0.037 | 0.895  | 0.987 |
| 1368206_at   | NM_130756 | acyl-CoA thioesterase 8                                                    | Acot8            | 0.742  | 0.321 | 1.208  | 0.221 | 0.506  | 0.000 | 1.306  | 0.013 |
| 1372552_at   | AI102273  | acyl-Coenzyme A binding domain containing 3                                | Acbd3            | 0.814  | 0.055 | 0.962  | 0.587 | 0.835  | 0.006 | 0.856  | 0.083 |
| 1394734_at   | BE120590  | acyl-Coenzyme A binding domain containing 3                                | Acbd3            | 0.836  | 0.277 | 1.675  | 0.039 | 0.782  | 0.255 | 1.755  | 0.062 |
| 1373347_at   | BF419134  | acyl-Coenzyme A binding domain containing 3                                | Acbd3            | 0.944  | 0.778 | 0.913  | 0.597 | 1.106  | 0.873 | 1.354  | 0.133 |
| 1395913_at   | AI136400  | Acyl-Coenzyme A binding domain containing 4                                | Acbd4            | 1.236  | 0.162 | 1.067  | 0.350 | 1.257  | 0.175 | 1.210  | 0.439 |
| 1373507_at   | AI232810  | acyl-Coenzyme A binding domain containing 5                                | Acbd5            | 0.662  | 0.031 | 0.369  | 0.000 | 0.749  | 0.227 | 0.505  | 0.004 |
| 1374555_at   | AI501425  | acyl-Coenzyme A binding domain containing 6                                | Acbd6            | 1.222  | 0.513 | 1.666  | 0.011 | 0.823  | 0.416 | 1.384  | 0.218 |
| 1390789_at   | BI296347  | acyl-Coenzyme A dehydrogenase family, member 11 (predicted)                | Acad11_predicted | 0.474  | 0.231 | 0.715  | 0.056 | 0.374  | 0.018 | 0.797  | 0.590 |
| 1373389_at   | BM391807  | acyl-Coenzyme A dehydrogenase family, member 9                             | Acad9            | 0.516  | 0.002 | 0.639  | 0.005 | 0.719  | 0.103 | 0.861  | 0.230 |
| 1367897_at   | NM_012891 | acyl-Coenzyme A dehydrogenase, very long chain                             | Acadv1           | 0.696  | 0.546 | 0.865  | 0.299 | 0.941  | 0.208 | 0.958  | 0.724 |
| 1367680_at   | NM_017340 | acyl-Coenzyme A oxidase 1, palmitoyl                                       | Acox1            | 0.696  | 0.150 | 0.852  | 0.018 | 0.630  | 0.003 | 0.959  | 0.181 |
| 1377887_at   | AI013044  | Acyl-Coenzyme A oxidase 3, pristanoyl                                      | Acox3            | 1.149  | 0.402 | 0.634  | 0.082 | 1.317  | 0.294 | 0.784  | 0.407 |
| 1398815_at   | NM_012500 | acylpeptide hydrolase                                                      | Apeh             | 0.628  | 0.451 | 0.416  | 0.003 | 0.639  | 0.130 | 0.487  | 0.196 |
| 1373448_at   | AI413052  | acylphosphatase 1, erythrocyte (common) type (predicted)                   | Acyp1_predicted  | 0.874  | 0.451 | 0.905  | 0.266 | 0.854  | 0.306 | 1.396  | 0.034 |
| 1371923_at   | BG380281  | acyltransferase like 2 (predicted)                                         | Ayt12_predicted  | 0.706  | 0.722 | 0.119  | 0.006 | 0.811  | 0.898 | 0.232  | 0.001 |
| 1367872_at   | NM_017277 | adaptor protein complex AP-1, beta 1 subunit                               | Ap1b1            | 1.052  | 0.995 | 0.923  | 0.147 | 0.910  | 0.630 | 0.883  | 0.112 |
| 1374305_at   | AI408613  | adaptor protein complex AP-1, gamma 2 subunit (predicted)                  | Ap1g2_predicted  | 0.939  | 0.881 | 0.701  | 0.337 | 1.343  | 0.364 | 0.736  | 0.842 |
| 1371858_at   | BM385719  | adaptor protein complex AP-1, sigma 1 (predicted)                          | Ap1s1_predicted  | 0.572  | 0.020 | 1.119  | 0.320 | 0.616  | 0.002 | 0.824  | 0.855 |
| 1377769_at   | AA955775  | adaptor protein complex AP-1, sigma 1 (predicted)                          | Ap1s1_predicted  | 0.570  | 0.989 | 0.918  | 0.841 | 0.567  | 0.054 | 0.769  | 0.110 |
| 1371493_at   | BI285640  | Adaptor protein complex AP-2, alpha 2 subunit                              | Ap2a2            | 0.650  | 0.454 | 0.509  | 0.059 | 0.469  | 0.070 | 0.453  | 0.011 |
| 1369982_at   | NM_031008 | adaptor protein complex AP-2, alpha 2 subunit                              | Ap2a2            | 0.710  | 0.487 | 1.093  | 0.031 | 0.513  | 0.017 | 0.893  | 0.312 |
| 1373816_at   | BM383443  | adaptor-related protein complex 1, gamma 1 subunit                         | Ap1g1            | 1.102  | 0.638 | 1.779  | 0.008 | 1.367  | 0.066 | 1.384  | 0.030 |
| 1384187_at   | BF551686  | adaptor-related protein complex 1, sigma 2 subunit (predicted)             | Ap1s2_predicted  | 0.601  | 0.050 | 0.528  | 0.018 | 0.557  | 0.005 | 0.641  | 0.071 |
| 1398616_at   | AI045228  | adaptor-related protein complex 1, sigma 2 subunit (predicted)             | Ap1s2_predicted  | 0.539  | 0.057 | 0.580  | 0.008 | 0.996  | 0.724 | 0.809  | 0.123 |
| 1396217_at   | BF542447  | Adaptor-related protein complex 1, sigma 2 subunit (predicted)             | Ap1s2_predicted  | 0.517  | 0.129 | 0.312  | 0.008 | 0.485  | 0.031 | 0.201  | 0.060 |
| 1384703_at   | AI228602  | Adaptor-related protein complex 1, sigma 2 subunit (predicted)             | Ap1s2_predicted  | 0.934  | 0.732 | 1.023  | 0.995 | 0.607  | 0.183 | 0.800  | 0.288 |
| 1367704_at   | NM_080583 | adaptor-related protein complex 2, beta 1 subunit                          | Ap2b1            | 1.006  | 0.129 | 0.692  | 0.004 | 1.041  | 0.431 | 0.664  | 0.051 |
| 1398765_at   | NM_053837 | adaptor-related protein complex 2, mu 1 subunit                            | Ap2m1            | 1.078  | 0.345 | 1.056  | 0.052 | 1.025  | 0.664 | 1.176  | 0.027 |
| 1386877_at   | NM_022952 | adaptor-related protein complex 2, sigma 1 subunit                         | Ap2s1            | 0.582  | 0.086 | 0.741  | 0.252 | 0.616  | 0.081 | 0.950  | 0.271 |
| 1373888_at   | BE113312  | adaptor-related protein complex 3, beta 1 subunit (predicted)              | Ap3b1_predicted  | 0.899  | 0.727 | 0.884  | 0.045 | 1.214  | 0.854 | 0.835  | 0.797 |
| 1393359_at   | AW534487  | adaptor-related protein complex 3, beta 2 subunit (predicted)              | Ap3b2_predicted  | 1.224  | 0.021 | 0.531  | 0.019 | 1.654  | 0.069 | 0.770  | 0.131 |
| 1367549_a_at | BI282757  | adaptor-related protein complex 3, delta 1 subunit                         | Ap3d1            | 0.733  | 0.012 | 1.247  | 0.140 | 0.969  | 0.210 | 1.146  | 0.008 |
| 1393562_at   | BF564312  | adaptor-related protein complex 3, mu 1 subunit                            | Ap3m1            | 0.555  | 0.029 | 0.382  | 0.010 | 0.658  | 0.024 | 0.474  | 0.046 |
| 1368062_at   | NM_133593 | adaptor-related protein complex 3, mu 1 subunit                            | Ap3m1            | 0.547  | 0.181 | 0.447  | 0.006 | 0.622  | 0.003 | 0.632  | 0.102 |
| 1368246_at   | NM_133305 | adaptor-related protein complex 3, mu 2 subunit                            | Ap3m2            | 2.191  | 0.009 | 1.003  | 0.987 | 2.113  | 0.001 | 1.017  | 0.930 |
| 1373024_at   | BI296511  | adaptor-related protein complex 3, sigma 1 subunit (predicted)             | Ap3s1_predicted  | 0.731  | 0.510 | 0.672  | 0.008 | 0.801  | 0.964 | 0.694  | 0.138 |
| 1372045_at   | BE112941  | adaptor-related protein complex AP-1, mu subunit 1                         | Ap1m1            | 0.806  | 0.188 | 1.320  | 0.023 | 1.065  | 0.324 | 1.300  | 0.006 |
| 1376874_a_at | BF560100  | adaptor-related protein complex AP-4, beta 1 (predicted)                   | Ap4b1_predicted  | 0.941  | 0.401 | 1.578  | 0.015 | 1.148  | 0.108 | 1.192  | 0.295 |

|            |           |                                                                                                 |                   |        |       |        |       |        |       |        |       |
|------------|-----------|-------------------------------------------------------------------------------------------------|-------------------|--------|-------|--------|-------|--------|-------|--------|-------|
| 1372628_at | AA800277  | adaptor-related protein complex AP-4, sigma 1 (predicted)                                       | Ap4s1_predicted   | 0.787  | 0.274 | 0.893  | 0.155 | 0.649  | 0.011 | 0.843  | 0.017 |
| 1396251_at | BF388318  | Adaptor-related protein complex AP-4, sigma 1 (predicted)                                       | Ap4s1_predicted   | 0.985  | 0.995 | 4.621  | 0.028 | 1.000  | 1.000 | 4.034  | 0.048 |
| 1388487_at | AI600061  | adducin 1 (alpha)                                                                               | Add1              | 0.692  | 0.202 | 0.898  | 0.154 | 0.584  | 0.018 | 0.866  | 0.385 |
| 1394421_at | BF282980  | Adducin 1 (alpha)                                                                               | Add1              | 1.000  | 0.984 | 1.300  | 0.094 | 1.001  | 0.885 | 1.350  | 0.035 |
| 1371244_at | AI412934  | adenine phosphoribosyl transferase (predicted)                                                  | Aprt_predicted    | 0.645  | 0.452 | 1.235  | 0.941 | 0.498  | 0.024 | 1.012  | 0.783 |
| 1387837_at | NM_012499 | adenomatosis polyposis coli                                                                     | Apc               | 0.883  | 0.794 | 0.870  | 0.038 | 0.505  | 0.035 | 0.579  | 0.066 |
| 1387721_at | NM_017155 | adenosine A1 receptor                                                                           | Adora1            | 0.928  | 0.812 | 0.976  | 0.905 | 0.786  | 0.742 | 0.837  | 0.508 |
| 1387395_at | NM_017161 | adenosine A2B receptor                                                                          | Adora2b           | 1.027  | 0.584 | 1.564  | 0.271 | 1.057  | 0.051 | 1.149  | 0.326 |
| 1368973_at | NM_031006 | adenosine deaminase, RNA-specific                                                               | Adar              | 1.018  | 0.046 | 1.078  | 0.242 | 1.022  | 0.242 | 1.436  | 0.138 |
| 1394528_at | BF405166  | Adenosine deaminase, RNA-specific                                                               | Adar              | 0.805  | 0.178 | 1.000  | 0.298 | 1.312  | 0.097 | 1.002  | 0.973 |
| 1369630_at | BF283118  | adenosine kinase                                                                                | Adk               | 0.879  | 0.187 | 0.786  | 0.014 | 0.874  | 0.098 | 0.744  | 0.003 |
| 1369629_at | U90340    | adenosine kinase                                                                                | Adk               | 0.907  | 0.929 | 0.506  | 0.017 | 0.998  | 0.994 | 0.509  | 0.036 |
| 1398306_at | J02811    | adenosine monophosphate deaminase 1 (isoform M)                                                 | Ampd1             | 2.094  | 0.071 | 1.082  | 0.087 | 3.013  | 0.049 | 1.069  | 0.209 |
| 1368342_at | NM_031544 | adenosine monophosphate deaminase 3                                                             | Ampd3             | 13.268 | 0.000 | 5.949  | 0.006 | 10.080 | 0.033 | 1.841  | 0.144 |
| 1376549_at | BF394116  | Adenylate cyclase 10 (soluble)                                                                  | Adcy10            | 0.642  | 0.810 | 1.167  | 0.853 | 1.250  | 0.740 | 0.915  | 0.778 |
| 1367644_at | L01115    | adenylate cyclase 6                                                                             | Adcy6             | 0.475  | 0.020 | 0.549  | 0.011 | 0.363  | 0.128 | 0.635  | 0.177 |
| 1368892_at | NM_016989 | adenylate cyclase activating polypeptide 1                                                      | Adcyap1           | 1.150  | 0.675 | 1.633  | 0.083 | 1.003  | 0.833 | 0.997  | 0.885 |
| 1386954_at | NM_030986 | adenylate kinase 2                                                                              | Ak2               | 0.880  | 0.646 | 0.997  | 0.547 | 0.509  | 0.036 | 1.045  | 0.684 |
| 1398349_at | AI411497  | adenylate kinase 2                                                                              | Ak2               | 0.925  | 0.884 | 1.145  | 0.036 | 0.878  | 0.346 | 1.229  | 0.055 |
| 1368095_at | NM_013218 | adenylate kinase 3                                                                              | Ak3               | 1.151  | 0.066 | 0.819  | 0.117 | 0.945  | 0.180 | 0.814  | 0.035 |
| 1371824_at | AA891949  | adenylate kinase 3-like 1                                                                       | Ak3l1             | 0.470  | 0.657 | 34.019 | 0.006 | 0.830  | 0.631 | 22.220 | 0.002 |
| 1376091_at | AA963616  | adenylosuccinate lyase (predicted)                                                              | Adsl_predicted    | 0.896  | 0.226 | 1.849  | 0.001 | 0.852  | 0.754 | 1.405  | 0.009 |
| 1399050_at | AI232106  | adenylosuccinate synthetase, non muscle (predicted)                                             | Adss_predicted    | 1.077  | 0.420 | 0.936  | 0.133 | 1.040  | 0.583 | 1.029  | 0.150 |
| 1375587_at | AI412674  | Adenylosuccinate synthetase, non muscle (predicted)                                             | Adss_predicted    | 1.086  | 0.486 | 1.005  | 0.885 | 1.206  | 0.737 | 1.000  | 0.994 |
| 1373345_at | AW523747  | adhesion molecule with Ig like domain 2                                                         | Amigo2            | 0.911  | 0.691 | 0.558  | 0.024 | 0.658  | 0.026 | 0.418  | 0.001 |
| 1367868_at | NM_031708 | adhesion regulating molecule 1                                                                  | Adrm1             | 0.699  | 0.482 | 1.359  | 0.005 | 0.648  | 0.034 | 1.346  | 0.019 |
| 1388373_at | BI289063  | adiponectin receptor 1                                                                          | Adipor1           | 0.937  | 0.879 | 0.821  | 0.254 | 0.862  | 0.323 | 0.662  | 0.013 |
| 1371598_at | BI278598  | Adiponectin receptor 2                                                                          | Adipor2           | 0.919  | 0.750 | 1.003  | 0.723 | 0.647  | 0.226 | 0.890  | 0.019 |
| 1390549_at | AA859796  | adiponectin receptor 2                                                                          | Adipor2           | 1.068  | 0.870 | 0.921  | 0.386 | 0.611  | 0.038 | 0.970  | 0.860 |
| 1390383_at | BI285616  | adipose differentiation related protein                                                         | Adfp              | 1.401  | 0.122 | 1.610  | 0.033 | 0.757  | 0.261 | 1.227  | 0.090 |
| 1390850_at | AA874941  | Adipose differentiation related protein                                                         | Adfp              | 1.520  | 0.221 | 1.598  | 0.002 | 0.814  | 0.039 | 1.233  | 0.068 |
| 1374958_at | AA819640  | ADP-dependent glucokinase                                                                       | Adpgk             | 0.400  | 0.018 | 1.189  | 0.641 | 0.660  | 0.040 | 0.775  | 0.042 |
| 1377952_at | BE102146  | ADP-dependent glucokinase                                                                       | Adpgk             | 0.515  | 0.054 | 1.703  | 0.901 | 0.408  | 0.067 | 1.176  | 0.910 |
| 1395163_at | BI296281  | ADP-dependent glucokinase                                                                       | Adpgk             | 2.137  | 0.329 | 1.154  | 0.102 | 2.497  | 0.006 | 0.614  | 0.076 |
| 1370505_at | M86341    | ADP-ribosylarginine hydrolase                                                                   | Adprh             | 0.807  | 0.926 | 0.742  | 0.038 | 0.356  | 0.363 | 0.525  | 0.006 |
| 1395386_at | BF411881  | ADP-ribosylation factor 1                                                                       | Arf1              | 0.825  | 0.256 | 0.788  | 0.769 | 0.822  | 0.224 | 0.974  | 0.823 |
| 1395241_at | BF389686  | ADP-ribosylation factor 1                                                                       | Arf1              | 0.781  | 0.304 | 1.440  | 0.194 | 1.042  | 0.296 | 1.053  | 0.825 |
| 1367459_at | BE329198  | ADP-ribosylation factor 1                                                                       | Arf1              | 0.760  | 0.642 | 0.992  | 0.453 | 0.691  | 0.285 | 1.013  | 0.568 |
| 1398817_at | NM_022518 | ADP-ribosylation factor 1                                                                       | Arf1              | 0.687  | 0.953 | 0.733  | 0.222 | 0.467  | 0.405 | 0.543  | 0.114 |
| 1388813_at | BE112160  | ADP-ribosylation factor 2                                                                       | Arf2              | 1.204  | 0.961 | 2.589  | 0.049 | 1.903  | 0.281 | 2.437  | 0.000 |
| 1388997_at | BG380819  | ADP-ribosylation factor 3                                                                       | Arf3              | 1.104  | 0.345 | 0.916  | 0.026 | 1.187  | 0.035 | 1.008  | 0.231 |
| 1387447_at | NM_080904 | ADP-ribosylation factor 3                                                                       | Arf3              | 1.075  | 0.754 | 1.036  | 0.221 | 1.379  | 0.069 | 0.995  | 0.835 |
| 1395162_at | BI301804  | ADP-ribosylation factor 3                                                                       | Arf3              | 1.000  | 0.961 | 0.930  | 0.751 | 0.994  | 0.308 | 1.177  | 0.806 |
| 1398758_at | NM_024151 | ADP-ribosylation factor 4                                                                       | Arf4              | 0.783  | 0.671 | 0.938  | 0.323 | 0.854  | 0.677 | 0.957  | 0.516 |
| 1367748_at | NM_024149 | ADP-ribosylation factor 5                                                                       | Arf5              | 0.908  | 0.029 | 0.736  | 0.025 | 0.800  | 0.050 | 0.811  | 0.119 |
| 1369998_at | NM_024152 | ADP-ribosylation factor 6                                                                       | Arf6              | 1.976  | 0.118 | 3.037  | 0.001 | 1.274  | 0.628 | 1.922  | 0.007 |
| 1376268_at | BM387435  | ADP-ribosylation factor 6                                                                       | Arf6              | 1.284  | 0.202 | 1.328  | 0.143 | 1.055  | 0.266 | 1.189  | 0.239 |
| 1389492_at | AA818820  | ADP-ribosylation factor GTPase activating protein 1                                             | Arfgap1           | 0.523  | 0.004 | 0.735  | 0.223 | 0.753  | 0.037 | 0.844  | 0.241 |
| 1376123_at | BM384190  | ADP-ribosylation factor GTPase activating protein 1                                             | Arfgap1           | 0.627  | 0.146 | 0.881  | 0.424 | 0.375  | 0.056 | 0.945  | 0.182 |
| 1370364_at | U35776    | ADP-ribosylation factor GTPase activating protein 1                                             | Arfgap1           | 0.447  | 0.169 | 0.804  | 0.188 | 0.458  | 0.005 | 0.476  | 0.030 |
| 1372130_at | AI408249  | ADP-ribosylation factor guanine nucleotide-exchange factor 1(brefeldin A-inhibited) (predicted) | Arfgef1_predicted | 1.103  | 0.164 | 0.912  | 0.563 | 1.139  | 0.113 | 1.392  | 0.003 |
| 1373591_at | BG375435  | ADP-ribosylation factor interacting protein 2                                                   | Arfip2            | 0.608  | 0.013 | 1.191  | 0.040 | 0.578  | 0.085 | 0.660  | 0.126 |
| 1370223_at | AI170798  | ADP-ribosylation factor related protein 1                                                       | Arfrp1            | 0.812  | 0.706 | 1.816  | 0.006 | 0.859  | 0.198 | 1.594  | 0.046 |
| 1371690_at | AA849825  | ADP-ribosylation factor-like 1                                                                  | Arl1              | 0.682  | 0.384 | 0.872  | 0.034 | 0.682  | 0.012 | 0.725  | 0.008 |
| 1387358_at | NM_022385 | ADP-ribosylation factor-like 1                                                                  | Arl1              | 0.586  | 0.708 | 1.747  | 0.132 | 0.589  | 0.197 | 1.335  | 0.396 |
| 1368166_at | NM_031711 | ADP-ribosylation factor-like 2                                                                  | Arl2              | 1.392  | 0.608 | 0.943  | 0.974 | 1.110  | 0.291 | 1.780  | 0.041 |
| 1383813_at | BF567478  | ADP-ribosylation factor-like 2 binding protein                                                  | Arl2bp            | 0.811  | 0.164 | 1.065  | 0.131 | 0.802  | 0.163 | 0.993  | 0.994 |
| 1389941_at | BE109130  | ADP-ribosylation factor-like 2 binding protein                                                  | Arl2bp            | 0.789  | 0.179 | 0.900  | 0.714 | 0.683  | 0.047 | 0.848  | 0.166 |
| 1367747_at | NM_022700 | ADP-ribosylation factor-like 3                                                                  | Arl3              | 0.709  | 0.626 | 0.807  | 0.150 | 0.891  | 0.667 | 1.026  | 0.831 |
| 1367960_at | NM_019186 | ADP-ribosylation factor-like 4A                                                                 | Arl4a             | 3.236  | 0.001 | 4.429  | 0.000 | 2.037  | 0.001 | 3.247  | 0.013 |
| 1369729_at | NM_053979 | ADP-ribosylation factor-like 5A                                                                 | Arl5a             | 3.747  | 0.045 | 1.006  | 0.955 | 3.463  | 0.037 | 0.949  | 0.755 |

|            |           |                                                                        |                   |        |       |        |       |        |       |        |       |
|------------|-----------|------------------------------------------------------------------------|-------------------|--------|-------|--------|-------|--------|-------|--------|-------|
| 1372557_at | AI409182  | ADP-ribosylation factor-like 6 (predicted)                             | Arl6_predicted    | 0.576  | 0.237 | 0.897  | 0.033 | 0.687  | 0.108 | 0.727  | 0.005 |
| 1389967_at | AA892386  | ADP-ribosylation factor-like 6 interacting protein 1                   | Arl6ip1           | 0.743  | 0.705 | 1.268  | 0.136 | 0.753  | 0.458 | 1.420  | 0.050 |
| 1372085_at | AI237657  | ADP-ribosylation factor-like 6 interacting protein 2                   | Arl6ip2           | 0.783  | 0.301 | 1.054  | 0.362 | 0.900  | 0.231 | 0.895  | 0.184 |
| 1371907_at | BE101624  | ADP-ribosylation factor-like 6 interacting protein 4                   | Arl6ip4           | 0.534  | 0.253 | 1.090  | 0.375 | 0.373  | 0.009 | 0.988  | 0.896 |
| 1374387_at | BG662580  | ADP-ribosylation factor-like 6 interacting protein 5                   | Arl6ip5           | 1.635  | 0.032 | 1.307  | 0.709 | 1.810  | 0.063 | 1.273  | 0.636 |
| 1369319_at | NM_023972 | ADP-ribosylation factor-like 6 interacting protein 5                   | Arl6ip5           | 1.571  | 0.526 | 1.185  | 0.313 | 1.899  | 0.711 | 0.749  | 0.371 |
| 1372634_at | AI009334  | ADP-ribosylhydrolase like 2 (predicted)                                | Adprhl2_predicted | 0.823  | 0.137 | 2.129  | 0.005 | 0.695  | 0.052 | 2.462  | 0.005 |
| 1376810_at | AI103325  | ADP-ribosyltransferase (NAD+; poly (ADP-ribose) polymerase)-like 1     | Adprtl1           | 5.012  | 0.001 | 2.133  | 0.005 | 5.334  | 0.001 | 2.044  | 0.023 |
| 1387429_at | NM_012776 | adrenergic receptor kinase, beta 1                                     | Adrbk1            | 1.021  | 0.802 | 1.750  | 0.117 | 0.928  | 0.433 | 1.064  | 0.053 |
| 1370568_at | M58316    | adrenergic receptor, alpha 2c                                          | Adra2c            | 0.962  | 0.077 | 0.996  | 0.952 | 0.951  | 0.644 | 0.996  | 0.987 |
| 1368780_at | NM_013108 | adrenergic receptor, beta 3                                            | Adrb3             | 1.000  | 0.999 | 0.817  | 0.048 | 1.001  | 0.999 | 0.827  | 0.047 |
| 1387219_at | NM_012715 | adrenomedullin                                                         | Adm               | 33.758 | 0.019 | 28.683 | 0.021 | 14.925 | 0.021 | 19.060 | 0.031 |
| 1371996_at | AI232384  | AE binding protein 2 (predicted)                                       | Aebp2_predicted   | 0.583  | 0.020 | 1.067  | 0.243 | 0.731  | 0.006 | 1.035  | 0.529 |
| 1385344_at | AW526794  | AE binding protein 2 (predicted)                                       | Aebp2_predicted   | 0.757  | 0.038 | 1.265  | 0.589 | 0.687  | 0.038 | 1.252  | 0.195 |
| 1381994_at | BM385862  | AE binding protein 2 (predicted)                                       | Aebp2_predicted   | 0.662  | 0.174 | 0.197  | 0.004 | 0.652  | 0.120 | 0.311  | 0.015 |
| 1385728_at | BE108006  | AE binding protein 2 (predicted)                                       | Aebp2_predicted   | 0.619  | 0.188 | 0.560  | 0.895 | 0.997  | 0.274 | 0.532  | 0.454 |
| 1374618_at | BI279751  | AF4/FMR2 family, member 1 (predicted)                                  | Aff1_predicted    | 1.538  | 0.044 | 1.322  | 0.001 | 1.418  | 0.171 | 1.363  | 0.015 |
| 1397154_at | BF403248  | AF4/FMR2 family, member 1 (predicted)                                  | Aff1_predicted    | 1.034  | 0.741 | 1.412  | 0.070 | 1.834  | 0.044 | 2.237  | 0.011 |
| 1381810_at | BF408753  | AF4/FMR2 family, member 1 (predicted)                                  | Aff1_predicted    | 1.001  | 0.985 | 0.953  | 0.714 | 1.005  | 0.994 | 0.944  | 0.938 |
| 1397386_at | AI715727  | AF4/FMR2 family, member 4 (predicted)                                  | Aff4_predicted    | 1.676  | 0.182 | 2.001  | 0.032 | 0.855  | 0.715 | 1.861  | 0.077 |
| 1378170_at | AI556957  | AF4/FMR2 family, member 4 (predicted)                                  | Aff4_predicted    | 1.058  | 0.252 | 1.371  | 0.325 | 0.965  | 0.554 | 1.645  | 0.039 |
| 1394682_at | BF290030  | AF4/FMR2 family, member 4 (predicted)                                  | Aff4_predicted    | 1.002  | 0.749 | 1.082  | 0.549 | 0.998  | 0.992 | 1.358  | 0.630 |
| 1387392_at | NM_013217 | afadin                                                                 | Af6               | 1.234  | 0.561 | 2.158  | 0.040 | 1.265  | 0.396 | 1.918  | 0.067 |
| 1371266_at | X76456    | afamin                                                                 | Afm               | 0.997  | 0.968 | 1.002  | 0.448 | 1.007  | 0.924 | 1.004  | 0.999 |
| 1373660_at | BI280384  | AFG3(ATPase family gene 3)-like 1 (yeast) (predicted)                  | Afg3l1_predicted  | 0.630  | 0.030 | 0.725  | 0.506 | 0.928  | 0.046 | 1.004  | 0.370 |
| 1375022_at | AI548730  | AFG3(ATPase family gene 3)-like 2 (yeast)                              | Afg3l2            | 0.963  | 0.818 | 1.249  | 0.094 | 0.693  | 0.057 | 1.138  | 0.072 |
| 1383395_at | AI028979  | agmatine ureohydrolase (agmatinase)                                    | Agmat             | 1.273  | 0.090 | 1.001  | 0.187 | 2.428  | 0.007 | 1.002  | 0.317 |
| 1370307_at | M64780    | agrin                                                                  | Agrn              | 13.958 | 0.001 | 8.509  | 0.001 | 20.715 | 0.000 | 7.054  | 0.001 |
| 1371703_at | AI407114  | AHNAK nucleoprotein (desmoyokin)                                       | Ahnak             | 42.936 | 0.011 | 2.690  | 0.086 | 42.606 | 0.009 | 8.250  | 0.001 |
| 1371982_at | AI411960  | AIP1                                                                   | Aip1              | 0.809  | 0.355 | 0.920  | 0.385 | 0.696  | 0.516 | 0.852  | 0.272 |
| 1373122_at | BI284400  | ajuba homolog ( <i>Xenopus laevis</i> )                                | Jub               | 1.208  | 0.560 | 1.448  | 0.248 | 1.085  | 0.634 | 1.128  | 0.702 |
| 1372879_at | BI283873  | AKT1 substrate 1 (proline-rich) (predicted)                            | Akt1s1_predicted  | 0.621  | 0.017 | 0.999  | 0.628 | 0.693  | 0.000 | 0.993  | 0.950 |
| 1388394_at | BI282672  | alanyl-tRNA synthetase                                                 | Aars              | 1.218  | 0.550 | 2.087  | 0.002 | 0.954  | 0.232 | 1.800  | 0.012 |
| 1378476_at | BM390047  | Alanyl-tRNA synthetase like (predicted)                                | Aarsl_predicted   | 1.365  | 0.055 | 0.984  | 0.905 | 0.965  | 0.283 | 0.889  | 0.388 |
| 1371470_at | AI411895  | Alcohol dehydrogenase 4 (class II), pi polypeptide                     | Adh4              | 0.623  | 0.291 | 0.404  | 0.023 | 0.600  | 0.113 | 0.786  | 0.306 |
| 1389548_at | BF288683  | alcohol dehydrogenase, iron containing, 1                              | Adhfe1            | 1.012  | 0.809 | 0.272  | 0.031 | 1.001  | 0.892 | 0.273  | 0.031 |
| 1396383_at | BF412690  | aldehyde dehydrogenase 3 family, member B1                             | Aldh3b1           | 0.711  | 0.040 | 0.997  | 0.743 | 0.822  | 0.083 | 0.997  | 0.726 |
| 1368003_at | NM_053896 | aldehyde dehydrogenase family 1, subfamily A2                          | Aldh1a2           | 1.014  | 0.951 | 1.001  | 0.985 | 1.011  | 0.958 | 1.043  | 0.620 |
| 1368365_at | NM_031731 | aldehyde dehydrogenase family 3, subfamily A2                          | Aldh3a2           | 0.302  | 0.100 | 0.228  | 0.000 | 0.152  | 0.013 | 0.427  | 0.009 |
| 1387344_at | AI407458  | aldehyde dehydrogenase family 6, subfamily A1                          | Aldh6a1           | 0.399  | 0.051 | 0.506  | 0.007 | 0.700  | 0.064 | 0.446  | 0.003 |
| 1381411_at | AI548328  | Aldehyde dehydrogenase family 6, subfamily A1                          | Aldh6a1           | 0.963  | 0.897 | 1.367  | 0.978 | 0.490  | 0.394 | 0.964  | 0.871 |
| 1371567_at | AI411279  | aldehyde dehydrogenase family 7, member A1                             | Aldh7a1           | 0.404  | 0.197 | 0.258  | 0.001 | 0.473  | 0.015 | 0.330  | 0.000 |
| 1387867_at | BG672075  | aldehyde dehydrogenase family 9, subfamily A1                          | Aldh9a1           | 0.458  | 0.004 | 0.605  | 0.034 | 0.484  | 0.000 | 0.784  | 0.094 |
| 1398753_at | NM_031000 | aldo-keto reductase family 1, member A1                                | Akr1a1            | 1.039  | 0.421 | 1.350  | 0.012 | 1.008  | 0.221 | 1.308  | 0.053 |
| 1367734_at | NM_012498 | aldo-keto reductase family 1, member B4 (aldose reductase)             | Akr1b4            | 0.637  | 0.139 | 1.606  | 0.016 | 0.563  | 0.049 | 1.326  | 0.045 |
| 1370902_at | AI233740  | aldo-keto reductase family 1, member B8                                | Akr1b8            | 1.111  | 0.462 | 60.374 | 0.000 | 0.583  | 0.251 | 16.152 | 0.001 |
| 1398612_at | BM383010  | aldo-keto reductase family 1, member C12 (predicted)                   | Akr1c12_predicted | 0.588  | 0.000 | 1.372  | 0.117 | 0.541  | 0.001 | 1.356  | 0.024 |
| 1371997_at | BM390833  | aldo-keto reductase family 1, member E1                                | Akr1e1            | 0.324  | 0.023 | 0.326  | 0.019 | 0.404  | 0.053 | 0.242  | 0.023 |
| 1367843_at | NM_134407 | aldo-keto reductase family 7, member A2 (aflatoxin aldehyde reductase) | Akr7a2            | 0.449  | 0.014 | 0.446  | 0.252 | 0.447  | 0.026 | 0.605  | 0.080 |
| 1367617_at | NM_012495 | aldolase A                                                             | Aldoa             | 0.765  | 0.223 | 1.349  | 0.009 | 0.664  | 0.011 | 1.272  | 0.037 |
| 1386998_at | NM_012497 | aldolase C                                                             | Aldoc             | 1.000  | 0.754 | 1.886  | 0.167 | 3.821  | 0.053 | 3.838  | 0.020 |
| 1380448_at | AI112926  | AlkB, alkylation repair homolog ( <i>E. coli</i> ) (predicted)         | Alkbh_predicted   | 2.533  | 0.090 | 3.133  | 0.045 | 2.725  | 0.810 | 2.943  | 0.108 |
| 1371772_at | AI410425  | alkB, alkylation repair homolog 3 ( <i>E. coli</i> )                   | Alkbh3            | 0.947  | 0.784 | 2.215  | 0.008 | 0.779  | 0.245 | 1.885  | 0.007 |
| 1378726_at | AI556485  | AlkB, alkylation repair homolog 4 ( <i>E. coli</i> ) (predicted)       | Alkbh4_predicted  | 1.517  | 0.008 | 1.398  | 0.249 | 1.003  | 0.983 | 1.142  | 0.110 |
| 1375948_at | AI144919  | AlkB, alkylation repair homolog 5 ( <i>E. coli</i> ) (predicted)       | Alkbh5_predicted  | 1.260  | 0.449 | 2.583  | 0.056 | 0.693  | 0.715 | 1.827  | 0.037 |
| 1397525_at | AA848370  | AlkB, alkylation repair homolog 5 ( <i>E. coli</i> ) (predicted)       | Alkbh5_predicted  | 0.899  | 0.699 | 0.553  | 0.225 | 1.039  | 0.255 | 0.513  | 0.170 |
| 1397658_at | BF414555  | AlkB, alkylation repair homolog 5 ( <i>E. coli</i> ) (predicted)       | Alkbh5_predicted  | 0.985  | 0.781 | 1.003  | 0.958 | 0.846  | 0.166 | 0.765  | 0.067 |
| 1370806_at | AF465614  | all-trans-13,14-dihydroretinol saturase                                | Retsat            | 0.484  | 0.739 | 0.698  | 0.130 | 0.401  | 0.118 | 0.720  | 0.222 |
| 1368686_at | NM_012901 | alpha 1 microglobulin/bikunin                                          | Ambp              | 0.777  | 0.346 | 1.031  | 0.841 | 1.037  | 0.783 | 0.964  | 0.571 |
| 1373366_at | BM389337  | alpha glucosidase 2 alpha neutral subunit (predicted)                  | Ganab_predicted   | 0.681  | 0.715 | 0.429  | 0.003 | 0.875  | 0.196 | 0.461  | 0.001 |
| 1389989_at | BF397805  | alpha thalassemia/mental retardation syndrome X-linked homolog (human) | Atrx              | 0.791  | 0.322 | 0.879  | 0.468 | 0.900  | 0.412 | 0.968  | 0.600 |



|              |           |                                                                                        |                                |       |       |       |       |       |       |       |       |
|--------------|-----------|----------------------------------------------------------------------------------------|--------------------------------|-------|-------|-------|-------|-------|-------|-------|-------|
| 1393798_at   | BF398451  | alpha thalassemia/mental retardation syndrome X-linked homolog (human)                 | Atrx                           | 0.835 | 0.526 | 0.774 | 0.172 | 0.825 | 0.491 | 0.808 | 0.125 |
| 1385006_at   | BF393029  | alpha thalassemia/mental retardation syndrome X-linked homolog (human)                 | Atrx                           | 0.967 | 0.860 | 0.593 | 0.048 | 1.205 | 0.548 | 0.644 | 0.026 |
| 1367794_at   | NM_012488 | alpha-2-macroglobulin                                                                  | A2m                            | 1.005 | 0.943 | 0.967 | 0.803 | 1.299 | 0.151 | 1.115 | 0.995 |
| 1372533_at   | AI175790  | Alpha-mannosidase-like protein mRNA, 3' UTR                                            | ---                            | 1.347 | 0.017 | 1.437 | 0.005 | 2.060 | 0.006 | 1.514 | 0.034 |
| 1367775_at   | NM_012816 | alpha-methylacyl-CoA racemase                                                          | Amacr                          | 0.382 | 0.064 | 0.406 | 0.007 | 0.418 | 0.061 | 0.743 | 0.266 |
| 1370838_s_at | BM387423  | alpha-spectrin 2                                                                       | Spna2                          | 0.752 | 0.037 | 0.774 | 0.084 | 0.702 | 0.050 | 0.879 | 0.032 |
| 1397481_at   | BE120751  | Alstrom syndrome 1 (predicted)                                                         | Alms1_predicted                | 1.144 | 0.716 | 0.343 | 0.019 | 0.900 | 0.834 | 0.647 | 0.062 |
| 1369842_at   | NM_022227 | amiloride-sensitive cation channel 5, intestinal                                       | Accn5                          | 0.958 | 0.901 | 0.972 | 0.853 | 1.007 | 0.753 | 0.951 | 0.794 |
| 1372170_at   | AI411530  | aminoacylase 1                                                                         | Acy1                           | 0.923 | 0.581 | 1.652 | 0.090 | 0.896 | 0.596 | 1.212 | 0.123 |
| 1387223_at   | NM_017193 | aminoadipate aminotransferase                                                          | Aadat                          | 0.664 | 0.210 | 0.816 | 0.835 | 0.446 | 0.155 | 1.027 | 0.343 |
| 1379353_at   | AI233726  | aminoadipate-semialdehyde dehydrogenase-phosphopantetheinyl transferase (predicted)    | Aasdhppt_predicted             | 0.623 | 0.054 | 1.223 | 0.065 | 0.560 | 0.020 | 1.138 | 0.075 |
| 1377375_at   | AA944898  | aminoadipate-semialdehyde synthase (predicted)                                         | Aass_predicted                 | 0.304 | 0.060 | 0.213 | 0.000 | 0.330 | 0.009 | 0.202 | 0.007 |
| 1367720_at   | NM_012899 | aminolevulinate, delta-, dehydratase                                                   | Alad                           | 0.230 | 0.001 | 0.966 | 0.586 | 0.107 | 0.028 | 0.831 | 0.094 |
| 1367982_at   | NM_024484 | aminolevulinic acid synthase 1                                                         | Alas1                          | 1.173 | 0.753 | 2.485 | 0.001 | 0.758 | 0.932 | 1.857 | 0.018 |
| 1383920_at   | BF408907  | aminomethyltransferase (glycine cleavage system protein T)                             | Amt                            | 0.712 | 0.190 | 0.834 | 0.983 | 0.780 | 0.131 | 0.827 | 0.763 |
| 1388360_at   | BE110600  | aminopeptidase puromycin sensitive                                                     | Npepps                         | 1.259 | 0.298 | 1.728 | 0.069 | 1.260 | 0.242 | 1.342 | 0.105 |
| 1373570_at   | AI411240  | aminopeptidase-like 1 (predicted)                                                      | Npepl1_predicted               | 0.296 | 0.006 | 0.314 | 0.007 | 0.294 | 0.003 | 0.346 | 0.010 |
| 1387861_at   | BI274118  | amino-terminal enhancer of split                                                       | Aes                            | 0.652 | 0.483 | 0.623 | 0.016 | 0.483 | 0.022 | 0.543 | 0.029 |
| 1369839_at   | NM_022217 | amphiphysin 1                                                                          | Amph1                          | 0.594 | 0.066 | 0.675 | 0.252 | 0.810 | 0.262 | 0.670 | 0.231 |
| 1389660_at   | BE096098  | amphoterin induced gene and ORF 3                                                      | Amigo3                         | 0.552 | 0.141 | 0.948 | 0.797 | 0.760 | 0.475 | 0.832 | 0.520 |
| 1373442_at   | AI169058  | amplified in osteosarcoma                                                              | Os-9                           | 0.893 | 0.626 | 0.783 | 0.303 | 0.941 | 0.804 | 0.810 | 0.028 |
| 1369502_a_at | NM_031502 | amylase 1, salivary /// amylase 2, pancreatic /// similar to amylase 2, pancreatic     | Amy1 /// Amy2 ///<br>LOC499694 | 0.969 | 0.856 | 0.345 | 0.008 | 1.433 | 0.573 | 0.594 | 0.054 |
| 1369503_at   | NM_031502 | amylase 2, pancreatic                                                                  | Amy2                           | 1.437 | 0.959 | 0.356 | 0.022 | 1.073 | 0.994 | 0.462 | 0.043 |
| 1371571_at   | BG671677  | amyloid beta (A4) precursor protein                                                    | App                            | 0.706 | 0.139 | 0.609 | 0.016 | 0.973 | 0.901 | 0.621 | 0.017 |
| 1371572_at   | BM986220  | amyloid beta (A4) precursor protein                                                    | App                            | 0.786 | 0.744 | 0.583 | 0.014 | 0.772 | 0.242 | 0.684 | 0.033 |
| 1395120_at   | BF403704  | Amyloid beta (A4) precursor protein                                                    | App                            | 0.980 | 0.950 | 1.202 | 0.209 | 1.049 | 0.743 | 0.869 | 0.562 |
| 1396876_at   | BF393522  | Amyloid beta (A4) precursor protein-binding, family A, member 1                        | Apba1                          | 0.978 | 0.148 | 1.068 | 0.633 | 1.078 | 0.648 | 1.296 | 0.236 |
| 1376413_at   | BF410366  | Amyloid beta (A4) precursor protein-binding, family A, member 1                        | Apba1                          | 1.032 | 0.699 | 0.963 | 0.875 | 0.988 | 0.873 | 0.947 | 0.870 |
| 1367842_at   | NM_080478 | amyloid beta (A4) precursor protein-binding, family B, member 1                        | Apbb1                          | 0.934 | 0.400 | 0.820 | 0.120 | 0.818 | 0.405 | 0.961 | 0.130 |
| 1387185_at   | NM_053957 | amyloid beta (A4) precursor protein-binding, family B, member 3                        | Apbb3                          | 0.370 | 0.409 | 0.819 | 0.419 | 0.645 | 0.354 | 0.887 | 0.334 |
| 1388121_at   | M31322    | amyloid beta (A4) precursor-like protein 2                                             | Aplp2                          | 0.742 | 0.095 | 0.391 | 0.000 | 0.826 | 0.254 | 0.446 | 0.009 |
| 1383096_at   | AI235240  | amyloid beta (A4) precursor-like protein 2                                             | Aplp2                          | 1.099 | 0.776 | 0.957 | 0.705 | 0.998 | 0.983 | 0.965 | 0.592 |
| 1380895_at   | BE103215  | Amyloid beta (A4) precursor-like protein 2                                             | Aplp2                          | 0.925 | 0.887 | 0.654 | 0.238 | 0.927 | 0.970 | 0.559 | 0.103 |
| 1378475_at   | BF396428  | amyloid beta precursor protein (cytoplasmic tail) binding protein 2                    | Appbp2                         | 0.283 | 0.029 | 0.388 | 0.003 | 0.250 | 0.007 | 0.270 | 0.033 |
| 1383091_at   | BE113611  | amyloid beta precursor protein (cytoplasmic tail) binding protein 2                    | Appbp2                         | 0.560 | 0.175 | 1.281 | 0.204 | 0.326 | 0.000 | 0.856 | 0.048 |
| 1387055_at   | U90829    | amyloid beta precursor protein binding protein 1                                       | Appbp1                         | 0.816 | 0.028 | 0.912 | 0.138 | 0.534 | 0.019 | 0.819 | 0.140 |
| 1383155_at   | AA945854  | Amyotrophic lateral sclerosis 2 (juvenile) chromosome region, candidate 13 (predicted) | Als2cr13_predicted             | 0.649 | 0.369 | 0.467 | 0.012 | 0.919 | 0.546 | 0.640 | 0.017 |
| 1377166_at   | BI274184  | amyotrophic lateral sclerosis 2 (juvenile) homolog (human)                             | Als2                           | 0.783 | 0.443 | 1.238 | 0.132 | 0.706 | 0.618 | 1.161 | 0.029 |
| 1373744_at   | BF548006  | anaphase promoting complex subunit 1 (predicted)                                       | Anapc1_predicted               | 0.673 | 0.071 | 1.397 | 0.077 | 0.758 | 0.052 | 1.003 | 0.947 |
| 1383101_at   | BF556463  | anaphase promoting complex subunit 10 (predicted)                                      | Anapc10_predicted              | 0.826 | 0.324 | 0.950 | 0.106 | 0.926 | 0.986 | 1.032 | 0.822 |
| 1389087_at   | AI599023  | anaphase promoting complex subunit 2                                                   | Anapc2                         | 1.019 | 0.598 | 1.776 | 0.062 | 0.786 | 0.516 | 1.598 | 0.201 |
| 1374163_at   | BM389995  | anaphase promoting complex subunit 4                                                   | Anapc4                         | 0.734 | 0.111 | 0.666 | 0.143 | 0.852 | 0.249 | 0.692 | 0.058 |
| 1388417_at   | BI281876  | anaphase-promoting complex subunit 5 (predicted)                                       | Anapc5_predicted               | 0.716 | 0.058 | 0.597 | 0.001 | 0.642 | 0.058 | 0.551 | 0.002 |
| 1370512_at   | AF275151  | androgen receptor-related apoptosis-associated protein CBL27                           | Cbl27                          | 0.997 | 0.885 | 1.005 | 0.718 | 0.999 | 0.989 | 1.011 | 0.947 |
| 1397029_at   | BF399100  | Androgen receptor-related apoptosis-associated protein CBL27                           | Cbl27                          | 0.998 | 0.983 | 0.880 | 0.226 | 1.000 | 0.985 | 0.923 | 0.211 |
| 1392891_at   | AW535812  | androgen-induced proliferation inhibitor (predicted)                                   | Aprin_predicted                | 0.241 | 0.032 | 0.601 | 0.859 | 0.366 | 0.030 | 0.601 | 0.668 |
| 1377100_at   | AI172172  | androgen-induced proliferation inhibitor (predicted)                                   | Aprin_predicted                | 1.210 | 0.668 | 1.929 | 0.010 | 1.082 | 0.573 | 1.061 | 0.421 |
| 1395053_at   | BE104755  | androgen-induced proliferation inhibitor (predicted)                                   | Aprin_predicted                | 0.976 | 0.877 | 0.838 | 0.894 | 0.636 | 0.629 | 0.781 | 0.777 |
| 1393833_at   | AI578461  | angel homolog 1 (Drosophila) (predicted)                                               | Angel1_predicted               | 0.756 | 0.152 | 0.824 | 0.191 | 0.684 | 0.000 | 0.586 | 0.053 |
| 1395884_at   | BF414572  | angel homolog 2 (Drosophila) (predicted)                                               | Angel2_predicted               | 2.402 | 0.030 | 2.366 | 0.004 | 1.391 | 0.143 | 1.268 | 0.767 |
| 1398975_at   | BI281948  | angio-associated migratory protein (predicted)                                         | Aamp_predicted                 | 0.952 | 0.927 | 0.995 | 0.657 | 1.082 | 0.181 | 1.069 | 0.085 |
| 1395346_at   | H33829    | angio-associated migratory protein (predicted)                                         | Aamp_predicted                 | 1.000 | 0.995 | 0.995 | 0.594 | 1.000 | 0.993 | 0.999 | 0.904 |
| 1396100_at   | BF563171  | angiogenic factor with G patch and FHA domains 1                                       | Aggf1                          | 0.880 | 0.267 | 0.844 | 0.481 | 0.877 | 0.270 | 0.853 | 0.205 |
| 1383018_at   | BF420082  | angiopoietin-like 6 (predicted)                                                        | Angptl6_predicted              | 3.809 | 0.003 | 2.056 | 0.004 | 3.713 | 0.001 | 2.125 | 0.004 |
| 1398734_at   | BE120772  | Ankyrin 3, epithelial                                                                  | Ank3                           | 1.669 | 0.119 | 0.780 | 0.171 | 1.252 | 0.252 | 0.663 | 0.051 |
| 1370638_at   | AF069525  | ankyrin 3, epithelial                                                                  | Ank3                           | 0.761 | 0.673 | 0.583 | 0.014 | 0.858 | 0.138 | 0.333 | 0.022 |
| 1389493_at   | AI411278  | ankyrin repeat and BTB (POZ) domain containing 1                                       | Abtb1                          | 0.912 | 0.638 | 0.901 | 0.494 | 0.726 | 0.175 | 1.188 | 0.370 |
| 1368111_at   | NM_134403 | ankyrin repeat and BTB (POZ) domain containing 2                                       | Abtb2                          | 1.254 | 0.621 | 1.605 | 0.837 | 1.046 | 0.435 | 1.003 | 0.991 |
| 1373289_at   | BI281935  | ankyrin repeat and SOCS box-containing protein 8 (predicted)                           | Asb8_predicted                 | 0.722 | 0.006 | 0.463 | 0.004 | 0.825 | 0.099 | 0.670 | 0.014 |
| 1373619_at   | AA894306  | ankyrin repeat domain 10                                                               | Ankrd10                        | 0.710 | 0.073 | 0.802 | 0.051 | 0.724 | 0.221 | 0.772 | 0.032 |

|              |           |                                                                                                                                       |                                                                         |       |       |        |       |       |       |        |       |
|--------------|-----------|---------------------------------------------------------------------------------------------------------------------------------------|-------------------------------------------------------------------------|-------|-------|--------|-------|-------|-------|--------|-------|
| 1382620_at   | BF523248  | ankyrin repeat domain 11 (predicted)                                                                                                  | Ankrd11_predicted                                                       | 1.210 | 0.272 | 1.537  | 0.031 | 1.074 | 0.992 | 0.909  | 0.470 |
| 1381809_at   | BE097847  | ankyrin repeat domain 11 (predicted)                                                                                                  | Ankrd11_predicted                                                       | 1.160 | 0.320 | 3.123  | 0.013 | 0.502 | 0.171 | 3.372  | 0.173 |
| 1377811_at   | AI577496  | ankyrin repeat domain 12 (predicted)                                                                                                  | Ankrd12_predicted                                                       | 1.759 | 0.007 | 1.446  | 0.793 | 2.092 | 0.010 | 2.521  | 0.229 |
| 1386097_at   | AW527230  | ankyrin repeat domain 12 (predicted)                                                                                                  | Ankrd12_predicted                                                       | 2.023 | 0.041 | 1.773  | 0.159 | 2.117 | 0.013 | 1.415  | 0.092 |
| 1377505_at   | BI296695  | Ankyrin repeat domain 12 (predicted)                                                                                                  | Ankrd12_predicted                                                       | 1.065 | 0.361 | 1.010  | 0.904 | 0.826 | 0.181 | 0.945  | 0.853 |
| 1396195_at   | BF550130  | ankyrin repeat domain 13                                                                                                              | Ankrd13                                                                 | 0.826 | 0.997 | 1.472  | 0.056 | 0.999 | 0.987 | 1.174  | 0.136 |
| 1373059_at   | AA944355  | ankyrin repeat domain 13                                                                                                              | Ankrd13                                                                 | 0.964 | 0.998 | 1.236  | 0.059 | 0.877 | 0.322 | 1.497  | 0.003 |
| 1393022_at   | BG380737  | ankyrin repeat domain 13 family, member D (predicted)                                                                                 | Ankrd13d_predicted                                                      | 1.004 | 0.581 | 1.027  | 0.974 | 1.009 | 0.975 | 1.001  | 0.128 |
| 1372069_at   | BF284716  | ankyrin repeat domain 15                                                                                                              | Ankrd15                                                                 | 1.134 | 0.457 | 1.215  | 0.377 | 1.061 | 0.779 | 1.147  | 0.532 |
| 1371805_at   | AI406508  | ankyrin repeat domain 46                                                                                                              | Ankrd46                                                                 | 0.423 | 0.004 | 0.441  | 0.028 | 0.544 | 0.004 | 0.469  | 0.011 |
| 1375212_at   | AA964250  | ankyrin repeat domain 52 (predicted)                                                                                                  | Ankrd52_predicted                                                       | 0.952 | 0.167 | 0.802  | 0.716 | 0.971 | 0.706 | 0.816  | 0.702 |
| 1394451_at   | AI236455  | annexin A1                                                                                                                            | Anxa1                                                                   | 1.939 | 0.285 | 1.207  | 0.448 | 1.000 | 0.210 | 1.619  | 0.219 |
| 1388445_at   | BF287964  | annexin A11                                                                                                                           | Anxa11                                                                  | 2.095 | 0.002 | 1.082  | 0.110 | 2.025 | 0.004 | 0.862  | 0.032 |
| 1367584_at   | NM_019905 | annexin A2                                                                                                                            | Anxa2                                                                   | 8.639 | 0.008 | 44.504 | 0.000 | 2.835 | 0.099 | 17.510 | 0.005 |
| 1367974_at   | NM_012823 | annexin A3                                                                                                                            | Anxa3                                                                   | 1.168 | 0.501 | 2.050  | 0.028 | 1.147 | 0.056 | 1.353  | 0.140 |
| 1395784_at   | BF287979  | Annexin A4                                                                                                                            | Anxa4                                                                   | 0.821 | 0.074 | 1.200  | 0.620 | 1.640 | 0.026 | 1.427  | 0.620 |
| 1389305_at   | BM385237  | annexin A4                                                                                                                            | Anxa4                                                                   | 1.498 | 0.084 | 1.004  | 0.045 | 1.516 | 0.037 | 1.101  | 0.533 |
| 1368908_at   | NM_024155 | annexin A4                                                                                                                            | Anxa4                                                                   | 1.289 | 0.297 | 1.742  | 0.122 | 1.183 | 0.625 | 2.012  | 0.005 |
| 1386862_at   | NM_013132 | annexin A5                                                                                                                            | Anxa5                                                                   | 1.620 | 0.161 | 1.623  | 0.001 | 1.609 | 0.076 | 1.223  | 0.008 |
| 1387673_a_at | BI285568  | annexin A6                                                                                                                            | Anxa6                                                                   | 0.820 | 0.786 | 0.626  | 0.006 | 1.173 | 0.280 | 0.521  | 0.001 |
| 1368143_at   | AI013902  | annexin A7                                                                                                                            | Anxa7                                                                   | 1.590 | 0.036 | 2.032  | 0.001 | 1.035 | 0.836 | 1.614  | 0.008 |
| 1368142_at   | NM_130416 | annexin A7                                                                                                                            | Anxa7                                                                   | 2.598 | 0.059 | 1.443  | 0.140 | 1.107 | 0.771 | 1.340  | 0.598 |
| 1389441_at   | BF416508  | annexin V-binding protein ABP-10                                                                                                      | Abp10                                                                   | 0.625 | 0.039 | 1.700  | 0.407 | 0.656 | 0.650 | 1.015  | 0.501 |
| 1388885_at   | BI275921  | anterior pharynx defective 1a homolog (C. elegans)                                                                                    | Aph1a                                                                   | 0.929 | 0.762 | 1.151  | 0.102 | 0.841 | 0.172 | 0.988  | 0.992 |
| 1395521_at   | BI299174  | Anterior pharynx defective 1b homolog (C. elegans)                                                                                    | Aph1b                                                                   | 1.050 | 0.800 | 1.368  | 0.131 | 1.153 | 0.462 | 1.291  | 0.168 |
| 1388440_at   | AI408482  | anterior pharynx defective 1b homolog (C. elegans)                                                                                    | Aph1b                                                                   | 1.045 | 0.811 | 0.996  | 0.984 | 1.058 | 0.572 | 0.669  | 0.685 |
| 1374775_at   | AI714002  | antigen identified by monoclonal antibody Ki-67 (predicted) /// similar to Mki67 protein (predicted) /// similar to Ki-67 (predicted) | Mki67_predicted ///<br>RGD1564824_predicted ///<br>RGD1566252_predicted | 1.082 | 0.980 | 1.085  | 0.351 | 1.425 | 0.087 | 0.874  | 0.164 |
| 1380270_at   | BF417890  | Antigen p97 (melanoma associated) identified by monoclonal antibodies 133.2 and 96.5 (predicted)                                      | Mfi2_predicted                                                          | 1.000 | 0.227 | 1.001  | 0.991 | 0.997 | 0.986 | 0.999  | 0.984 |
| 1368243_at   | NM_030998 | anti-Mullerian hormone type 2 receptor                                                                                                | Amhr2                                                                   | 0.687 | 0.076 | 1.281  | 0.141 | 1.009 | 0.084 | 1.015  | 0.775 |
| 1384675_at   | AI029113  | antisense paternally expressed gene 3                                                                                                 | Apeg3                                                                   | 0.570 | 0.099 | 0.414  | 0.001 | 1.042 | 0.819 | 0.588  | 0.002 |
| 1372025_at   | BI296467  | Antisense paternally expressed gene 3                                                                                                 | Apeg3                                                                   | 1.183 | 0.326 | 0.496  | 0.016 | 1.241 | 0.371 | 0.585  | 0.177 |
| 1370575_a_at | D50734    | antizyme inhibitor 1                                                                                                                  | Azin1                                                                   | 1.049 | 0.372 | 2.233  | 0.024 | 1.088 | 0.810 | 1.930  | 0.020 |
| 1370191_at   | AI411263  | antizyme inhibitor 1                                                                                                                  | Azin1                                                                   | 0.651 | 0.597 | 0.818  | 0.159 | 0.766 | 0.154 | 0.915  | 0.228 |
| 1388450_at   | BI279570  | AP1 gamma subunit binding protein 1                                                                                                   | Ap1gbp1                                                                 | 1.008 | 0.966 | 0.754  | 0.153 | 1.475 | 0.019 | 0.837  | 0.588 |
| 1367536_at   | AI172106  | APAF1 interacting protein (predicted)                                                                                                 | Apip_predicted                                                          | 0.623 | 0.460 | 1.605  | 0.003 | 0.619 | 0.021 | 1.093  | 0.114 |
| 1398805_at   | NM_134394 | APG3 autophagy 3-like (S. cerevisiae)                                                                                                 | Apg3l                                                                   | 1.943 | 0.074 | 2.475  | 0.000 | 1.603 | 0.049 | 2.000  | 0.020 |
| 1367520_at   | AI231050  | apolipoprotein A-I binding protein (predicted)                                                                                        | Apoalbp_predicted                                                       | 1.001 | 0.943 | 1.434  | 0.785 | 1.051 | 0.150 | 1.162  | 0.323 |
| 1390879_at   | BE098355  | Apolipoprotein B editing complex 2 (predicted)                                                                                        | Apobec2_predicted                                                       | 0.871 | 0.292 | 0.595  | 0.055 | 0.875 | 0.336 | 0.829  | 0.112 |
| 1396699_at   | BF392736  | Apolipoprotein B editing complex 3                                                                                                    | Apobec3                                                                 | 1.190 | 0.646 | 0.963  | 0.755 | 1.292 | 0.515 | 0.926  | 0.534 |
| 1379604_at   | BF284937  | apolipoprotein L, 3 /// similar to RIKEN cDNA 2210421G13                                                                              | Apo13 /// LOC500903                                                     | 1.724 | 0.228 | 1.003  | 0.960 | 1.589 | 0.234 | 1.001  | 0.994 |
| 1368330_at   | NM_053720 | apoptosis antagonizing transcription factor                                                                                           | Aatf                                                                    | 1.179 | 0.083 | 10.605 | 0.001 | 1.209 | 0.127 | 6.278  | 0.004 |
| 1392423_at   | AI602137  | Apoptosis antagonizing transcription factor                                                                                           | Aatf                                                                    | 1.216 | 0.471 | 1.223  | 0.914 | 1.335 | 0.077 | 1.003  | 0.792 |
| 1367491_at   | AI233249  | apoptosis inhibitor 5 (predicted)                                                                                                     | Api5_predicted                                                          | 1.005 | 0.209 | 0.873  | 0.061 | 1.054 | 0.388 | 1.050  | 0.275 |
| 1379484_at   | AA899459  | apoptosis, caspase activation inhibitor (predicted)                                                                                   | Aven_predicted                                                          | 0.967 | 0.366 | 1.235  | 0.469 | 0.861 | 0.244 | 1.226  | 0.063 |
| 1398944_at   | BE116857  | apoptotic chromatin condensation inducer 1                                                                                            | Acin1                                                                   | 1.055 | 0.205 | 1.079  | 0.872 | 1.299 | 0.037 | 1.010  | 0.168 |
| 1396098_at   | BG380369  | apoptotic chromatin condensation inducer 1                                                                                            | Acin1                                                                   | 0.984 | 0.941 | 0.828  | 0.278 | 1.307 | 0.513 | 0.842  | 0.114 |
| 1369197_at   | NM_023979 | apoptotic peptidase activating factor 1                                                                                               | Apaf1                                                                   | 2.157 | 0.061 | 1.398  | 0.020 | 3.754 | 0.001 | 2.477  | 0.010 |
| 1369198_at   | AF218388  | apoptotic peptidase activating factor 1                                                                                               | Apaf1                                                                   | 0.737 | 0.131 | 0.890  | 0.988 | 0.737 | 0.125 | 0.999  | 0.887 |
| 1376900_at   | BM390531  | aprataxin                                                                                                                             | Aptx                                                                    | 0.989 | 0.822 | 1.276  | 0.370 | 0.961 | 0.725 | 0.993  | 0.413 |
| 1386910_a_at | AF311054  | apurinic/apyrimidinic endonuclease 1                                                                                                  | Apex1                                                                   | 0.526 | 0.031 | 1.917  | 0.024 | 0.467 | 0.020 | 1.296  | 0.145 |
| 1371217_at   | AF311054  | apurinic/apyrimidinic endonuclease 1                                                                                                  | Apex1                                                                   | 0.912 | 0.086 | 1.645  | 0.011 | 0.393 | 0.022 | 1.212  | 0.257 |
| 1380794_at   | BE106342  | Aquarius (predicted)                                                                                                                  | Aqr_predicted                                                           | 1.599 | 0.078 | 0.940  | 0.187 | 1.206 | 0.125 | 1.318  | 0.295 |
| 1373704_at   | BI294892  | aquarius (predicted)                                                                                                                  | Aqr_predicted                                                           | 0.622 | 0.211 | 0.718  | 0.688 | 0.508 | 0.024 | 1.036  | 0.775 |
| 1385017_at   | AW533683  | aquarius (predicted)                                                                                                                  | Aqr_predicted                                                           | 0.844 | 0.884 | 1.322  | 0.161 | 1.190 | 0.375 | 1.629  | 0.141 |
| 1392689_at   | AI105029  | arachidonate lipoxygenase 3 (predicted)                                                                                               | Aloxe3_predicted                                                        | 7.435 | 0.009 | 2.189  | 0.012 | 2.015 | 0.012 | 1.274  | 0.282 |
| 1391658_at   | BF414061  | archain 1                                                                                                                             | Arcn1                                                                   | 0.742 | 0.707 | 2.709  | 0.041 | 0.813 | 0.333 | 1.103  | 0.319 |
| 1398896_at   | AA892567  | archain 1                                                                                                                             | Arcn1                                                                   | 0.751 | 0.965 | 1.635  | 0.000 | 0.681 | 0.253 | 1.446  | 0.018 |
| 1387018_at   | NM_053770 | Arg/Abl-interacting protein ArgBP2                                                                                                    | Argbp2                                                                  | 0.219 | 0.006 | 0.215  | 0.033 | 0.265 | 0.033 | 0.157  | 0.030 |
| 1368266_at   | NM_017134 | arginase 1                                                                                                                            | Arg1                                                                    | 0.645 | 0.017 | 0.145  | 0.005 | 0.763 | 0.158 | 0.276  | 0.023 |



|              |           |                                                                                |                  |       |       |        |       |       |       |       |       |
|--------------|-----------|--------------------------------------------------------------------------------|------------------|-------|-------|--------|-------|-------|-------|-------|-------|
| 1371265_at   | X83264    | arginine vasopressin receptor 2                                                | Avpr2            | 1.000 | 0.950 | 0.998  | 0.213 | 1.002 | 0.989 | 0.999 | 0.630 |
| 1370252_at   | BI282724  | arginine vasopressin-induced 1                                                 | Avpi1            | 0.745 | 0.024 | 2.000  | 0.027 | 0.537 | 0.030 | 1.848 | 0.073 |
| 1370251_at   | AI010260  | arginine vasopressin-induced 1                                                 | Avpi1            | 1.069 | 0.235 | 1.003  | 0.975 | 1.004 | 0.946 | 0.988 | 0.906 |
| 1389009_at   | BF418778  | arginine/serine-rich coiled-coil 1                                             | Rsrc1            | 0.920 | 0.084 | 1.930  | 0.111 | 0.764 | 0.391 | 1.576 | 0.169 |
| 1369049_at   | NM_053885 | arginine-glutamic acid dipeptide (RE) repeats                                  | Rere             | 1.682 | 0.010 | 3.806  | 0.002 | 1.584 | 0.045 | 4.257 | 0.001 |
| 1379575_at   | BF412271  | Arginine-glutamic acid dipeptide (RE) repeats                                  | Rere             | 1.268 | 0.431 | 1.293  | 0.271 | 1.095 | 0.760 | 1.256 | 0.280 |
| 1371890_at   | AI172033  | Arginine-glutamic acid dipeptide (RE) repeats                                  | Rere             | 1.059 | 0.657 | 0.857  | 0.036 | 1.048 | 0.719 | 0.977 | 0.684 |
| 1396047_at   | AW920332  | arginine-glutamic acid dipeptide (RE) repeats                                  | Rere             | 0.996 | 0.992 | 1.002  | 0.929 | 1.004 | 0.992 | 1.159 | 0.994 |
| 1372352_at   | AI170666  | arginine-rich, mutated in early stage tumors (predicted)                       | Armet_predicted  | 0.753 | 0.411 | 1.760  | 0.037 | 0.726 | 0.058 | 1.380 | 0.130 |
| 1377963_at   | AW526938  | Arginine-tRNA-protein transferase 1 (predicted)                                | Ate1_predicted   | 0.542 | 0.283 | 0.378  | 0.001 | 0.445 | 0.021 | 0.373 | 0.017 |
| 1394118_at   | AA894340  | Arginine-tRNA-protein transferase 1 (predicted)                                | Ate1_predicted   | 0.940 | 0.590 | 1.253  | 0.017 | 0.789 | 0.055 | 1.111 | 0.220 |
| 1377820_a_at | BI276525  | Arginine-tRNA-protein transferase 1 (predicted)                                | Ate1_predicted   | 1.073 | 0.865 | 1.438  | 0.012 | 0.872 | 0.011 | 1.315 | 0.030 |
| 1368916_at   | NM_021577 | argininosuccinate lyase                                                        | Asl              | 0.974 | 0.654 | 0.501  | 0.006 | 0.917 | 0.251 | 0.502 | 0.001 |
| 1370964_at   | BF283456  | argininosuccinate synthetase                                                   | Ass              | 5.933 | 0.000 | 14.215 | 0.004 | 0.754 | 0.920 | 1.727 | 0.078 |
| 1367987_at   | NM_031097 | arginyl aminopeptidase (aminopeptidase B)                                      | Rnpep            | 0.688 | 0.081 | 0.657  | 0.002 | 0.771 | 0.533 | 0.675 | 0.044 |
| 1372255_at   | BF283284  | arginyl-tRNA synthetase (predicted)                                            | Rars_predicted   | 1.824 | 0.045 | 2.458  | 0.001 | 2.068 | 0.001 | 2.688 | 0.016 |
| 1377684_at   | BE118562  | arginyl-tRNA synthetase-like (predicted)                                       | Rarsl_predicted  | 0.552 | 0.023 | 0.369  | 0.090 | 0.640 | 0.066 | 1.026 | 0.992 |
| 1379303_at   | AA964811  | ariadne homolog 2 (Drosophila) (predicted)                                     | Arih2_predicted  | 1.025 | 0.472 | 1.078  | 0.071 | 1.060 | 0.471 | 1.044 | 0.792 |
| 1373141_at   | AI236683  | ariadne homolog 2 (Drosophila) (predicted)                                     | Arih2_predicted  | 1.404 | 0.475 | 1.123  | 0.354 | 0.938 | 0.688 | 1.080 | 0.887 |
| 1375973_at   | AI600108  | ariadne ubiquitin-conjugating enzyme E2 binding protein homolog 1 (Drosophila) | Arih1            | 1.685 | 0.060 | 4.581  | 0.001 | 0.969 | 0.672 | 2.987 | 0.002 |
| 1393118_at   | BI295562  | armadillo repeat containing 1 (predicted)                                      | Armc1_predicted  | 0.811 | 0.206 | 1.680  | 0.038 | 0.614 | 0.066 | 1.639 | 0.015 |
| 1392930_at   | BI276980  | armadillo repeat containing 1 (predicted)                                      | Armc1_predicted  | 0.931 | 0.714 | 0.402  | 0.007 | 0.792 | 0.025 | 0.339 | 0.006 |
| 1373716_at   | BM390404  | armadillo repeat containing 5                                                  | Armc5            | 0.758 | 0.266 | 0.631  | 0.249 | 1.056 | 0.491 | 0.845 | 0.868 |
| 1393233_at   | BG381676  | Armadillo repeat containing 6 (predicted)                                      | Armc6_predicted  | 1.027 | 0.471 | 0.998  | 0.928 | 1.001 | 0.546 | 0.980 | 0.984 |
| 1393220_at   | AI502723  | Armadillo repeat containing 8 (predicted)                                      | Armc8_predicted  | 1.239 | 0.247 | 1.215  | 0.208 | 1.129 | 0.944 | 0.883 | 0.190 |
| 1385862_at   | BF552350  | armadillo repeat containing 9 (predicted)                                      | Armc9_predicted  | 0.539 | 0.105 | 0.947  | 0.739 | 0.691 | 0.076 | 1.066 | 0.975 |
| 1397092_at   | AI145850  | armadillo repeat containing 9 (predicted)                                      | Armc9_predicted  | 0.983 | 0.852 | 1.011  | 0.078 | 0.965 | 0.556 | 0.913 | 0.145 |
| 1373156_at   | AI385330  | armadillo repeat containing, X-linked 2                                        | Armcx2           | 0.465 | 0.156 | 0.903  | 0.121 | 0.482 | 0.012 | 0.905 | 0.215 |
| 1371741_at   | AI409891  | ARP1 actin-related protein 1 homolog A (yeast) (predicted)                     | Actr1a_predicted | 0.933 | 0.563 | 0.836  | 0.337 | 0.847 | 0.271 | 0.837 | 0.041 |
| 1373048_at   | AI177051  | ARP10 actin-related protein 10 homolog (S. cerevisiae)                         | Actr10           | 0.696 | 0.087 | 0.794  | 0.006 | 0.644 | 0.009 | 0.739 | 0.042 |
| 1398626_s_at | AW920881  | ARP2 actin-related protein 2 homolog (yeast)                                   | Actr2            | 1.057 | 0.552 | 1.586  | 0.027 | 0.868 | 0.211 | 1.145 | 0.080 |
| 1375424_at   | BE107525  | ARP2 actin-related protein 2 homolog (yeast)                                   | Actr2            | 0.743 | 0.743 | 1.799  | 0.012 | 0.820 | 0.348 | 1.227 | 0.032 |
| 1370890_at   | AI012420  | ARP3 actin-related protein 3 homolog (yeast)                                   | Actr3            | 1.285 | 0.086 | 2.278  | 0.004 | 1.042 | 0.363 | 1.789 | 0.036 |
| 1388128_at   | BI292004  | ARP3 actin-related protein 3 homolog (yeast)                                   | Actr3            | 1.331 | 0.158 | 0.953  | 0.534 | 1.175 | 0.547 | 1.133 | 0.841 |
| 1376353_at   | BI289883  | ARP5 actin-related protein 5 homolog (yeast) (predicted)                       | Actr5_predicted  | 0.687 | 0.339 | 0.838  | 0.424 | 0.835 | 0.150 | 1.298 | 0.011 |
| 1373472_at   | AI177008  | ARP6 actin-related protein 6 homolog (yeast) (predicted)                       | Actr6_predicted  | 1.146 | 0.332 | 1.405  | 0.005 | 1.442 | 0.489 | 1.992 | 0.006 |
| 1373096_at   | AI407406  | ARP8 actin-related protein 8 homolog (S. cerevisiae) (predicted)               | Actr8_predicted  | 0.624 | 0.274 | 0.820  | 0.091 | 0.543 | 0.082 | 0.999 | 0.181 |
| 1376297_at   | BE112202  | arrestin domain containing 1                                                   | Arrdc1           | 1.848 | 0.009 | 3.466  | 0.002 | 2.265 | 0.060 | 3.050 | 0.004 |
| 1370265_at   | BF285345  | arrestin, beta 2                                                               | Arrb2            | 1.064 | 0.473 | 0.786  | 0.052 | 1.164 | 0.102 | 1.345 | 0.156 |
| 1372142_at   | AI406558  | arsA arsenite transporter, ATP-binding, homolog 1 (bacterial)                  | Asna1            | 0.603 | 0.767 | 1.698  | 0.147 | 0.529 | 0.019 | 1.707 | 0.107 |
| 1368244_at   | NM_080890 | arsenic (+3 oxidation state) methyltransferase                                 | As3mt            | 0.818 | 0.091 | 0.450  | 0.014 | 0.398 | 0.065 | 0.370 | 0.018 |
| 1389057_at   | AI007774  | ARV1 homolog (yeast) (predicted)                                               | Arv1_predicted   | 1.430 | 0.129 | 1.595  | 0.010 | 1.561 | 0.043 | 1.414 | 0.059 |
| 1369244_at   | NM_012780 | aryl hydrocarbon receptor nuclear translocator                                 | Arnt             | 0.941 | 0.779 | 2.217  | 0.008 | 0.999 | 0.287 | 0.995 | 0.254 |
| 1370510_a_at | AB012600  | aryl hydrocarbon receptor nuclear translocator-like                            | Arntl            | 1.007 | 0.304 | 1.066  | 0.349 | 1.132 | 0.164 | 1.014 | 0.862 |
| 1388922_at   | BM388677  | aryl-hydrocarbon receptor-interacting protein                                  | Aip              | 0.806 | 0.848 | 1.845  | 0.175 | 0.667 | 0.187 | 1.042 | 0.349 |
| 1389339_at   | BF284062  | Arylsulfatase A                                                                | Arsa             | 0.638 | 0.015 | 0.798  | 0.154 | 0.896 | 0.294 | 0.716 | 0.037 |
| 1375412_at   | AI101331  | Arylsulfatase B                                                                | Arsb             | 0.599 | 0.172 | 0.322  | 0.016 | 1.115 | 0.286 | 0.483 | 0.094 |
| 1380525_at   | AA849862  | arylsulfatase E (chondrodysplasia punctata 1)                                  | Arse             | 0.497 | 0.126 | 0.835  | 0.204 | 1.449 | 0.338 | 0.977 | 0.899 |
| 1383120_at   | BE107993  | arylsulfatase K                                                                | Arsk             | 1.045 | 0.713 | 0.859  | 0.983 | 0.743 | 0.702 | 1.184 | 0.144 |
| 1385616_a_at | AI137136  | ASF1 anti-silencing function 1 homolog A (S. cerevisiae) (predicted)           | Asf1a_predicted  | 0.848 | 0.090 | 0.824  | 0.607 | 0.796 | 0.080 | 0.687 | 0.888 |
| 1379192_at   | AW528096  | ASF1 anti-silencing function 1 homolog A (S. cerevisiae) (predicted)           | Asf1a_predicted  | 1.008 | 0.867 | 0.914  | 0.348 | 0.985 | 0.886 | 0.913 | 0.058 |
| 1382847_at   | BG663056  | ash1 (absent, small, or homeotic)-like (Drosophila) (predicted)                | Ash1l_predicted  | 1.372 | 0.081 | 1.976  | 0.053 | 2.047 | 0.044 | 2.369 | 0.024 |
| 1380497_at   | AW521174  | ash1 (absent, small, or homeotic)-like (Drosophila) (predicted)                | Ash1l_predicted  | 1.228 | 0.125 | 0.543  | 0.066 | 1.718 | 0.044 | 0.282 | 0.043 |
| 1382862_at   | BE119506  | Ash1 (absent, small, or homeotic)-like (Drosophila) (predicted)                | Ash1l_predicted  | 1.665 | 0.254 | 1.099  | 0.543 | 1.231 | 0.578 | 1.292 | 0.934 |
| 1397969_at   | BF401230  | Ash1 (absent, small, or homeotic)-like (Drosophila) (predicted)                | Ash1l_predicted  | 0.993 | 0.931 | 0.963  | 0.552 | 1.298 | 0.233 | 0.933 | 0.081 |
| 1371458_at   | BF392740  | Ash1 (absent, small, or homeotic)-like (Drosophila) (predicted)                | Ash1l_predicted  | 0.944 | 0.943 | 0.974  | 0.981 | 1.026 | 0.489 | 1.164 | 0.993 |
| 1388871_at   | BG378089  | ash2 (absent, small, or homeotic)-like (Drosophila) (predicted)                | Ash2l_predicted  | 0.821 | 0.472 | 1.048  | 0.379 | 0.685 | 0.024 | 0.779 | 0.161 |
| 1389719_at   | BI287001  | Ash2 (absent, small, or homeotic)-like (Drosophila) (predicted)                | Ash2l_predicted  | 0.952 | 0.626 | 0.863  | 0.177 | 0.933 | 0.663 | 0.936 | 0.248 |
| 1393581_at   | AW528001  | asp (abnormal spindle)-like, microcephaly associated (Drosophila) (predicted)  | Aspm_predicted   | 1.039 | 0.358 | 0.680  | 0.927 | 1.230 | 0.670 | 1.366 | 0.146 |
| 1374871_at   | AI233343  | asparaginase like 1                                                            | Asrg1l           | 0.834 | 0.411 | 0.745  | 0.211 | 0.687 | 0.091 | 0.407 | 0.137 |
| 1387925_at   | U07202    | asparagine synthetase                                                          | Asns             | 1.144 | 0.069 | 1.340  | 0.012 | 0.910 | 0.536 | 1.239 | 0.019 |

|              |           |                                                                                                                                                                                                                |                                 |       |       |       |       |       |       |       |       |
|--------------|-----------|----------------------------------------------------------------------------------------------------------------------------------------------------------------------------------------------------------------|---------------------------------|-------|-------|-------|-------|-------|-------|-------|-------|
| 1373107_at   | BF283792  | asparagine-linked glycosylation 1 homolog (yeast, beta-1,4-mannosyltransferase) (predicted)                                                                                                                    | Alg1_predicted                  | 0.554 | 0.088 | 0.756 | 0.190 | 0.434 | 0.034 | 0.404 | 0.075 |
| 1372902_at   | BI289064  | asparagine-linked glycosylation 12 homolog (yeast, alpha-1,6-mannosyltransferase) (predicted)                                                                                                                  | Alg12_predicted                 | 0.622 | 0.268 | 2.863 | 0.016 | 0.782 | 0.042 | 1.452 | 0.135 |
| 1374459_at   | AII78448  | asparagine-linked glycosylation 2 homolog (yeast, alpha-1,3-mannosyltransferase)                                                                                                                               | Alg2                            | 0.578 | 0.314 | 0.551 | 0.001 | 0.570 | 0.096 | 0.632 | 0.009 |
| 1379521_at   | AW525817  | asparagine-linked glycosylation 3 homolog (yeast, alpha-1,3-mannosyltransferase)                                                                                                                               | Alg3                            | 0.722 | 0.627 | 1.441 | 0.011 | 0.458 | 0.004 | 1.134 | 0.045 |
| 1382019_at   | AA998062  | asparagine-linked glycosylation 5 homolog (yeast, dolichyl-phosphate beta-glucosyltransferase)                                                                                                                 | Alg5                            | 0.457 | 0.001 | 0.478 | 0.000 | 0.585 | 0.006 | 0.554 | 0.001 |
| 1375042_at   | BI287504  | asparagine-linked glycosylation 8 homolog (yeast, alpha-1,3-glucosyltransferase)                                                                                                                               | Alg8                            | 0.860 | 0.872 | 0.759 | 0.280 | 1.644 | 0.208 | 1.030 | 0.901 |
| 1392422_at   | AI236397  | asparagine-linked glycosylation 9 homolog (yeast, alpha 1,2 mannosyltransferase) (predicted)                                                                                                                   | Alg9_predicted                  | 0.639 | 0.228 | 1.201 | 0.193 | 0.525 | 0.009 | 1.479 | 0.057 |
| 1374437_at   | BF419336  | asparaginyl-tRNA synthetase                                                                                                                                                                                    | Nars                            | 1.054 | 0.552 | 2.611 | 0.000 | 0.784 | 0.478 | 2.346 | 0.003 |
| 1393345_at   | BF561145  | Aspartate-beta-hydroxylase (predicted)                                                                                                                                                                         | Asph_predicted                  | 0.621 | 0.347 | 0.335 | 0.000 | 0.907 | 0.605 | 0.530 | 0.014 |
| 1398954_at   | AI412298  | aspartyl aminopeptidase                                                                                                                                                                                        | Dnpep                           | 1.041 | 0.798 | 0.756 | 0.128 | 1.197 | 0.427 | 0.973 | 0.767 |
| 1372421_at   | AA943766  | aspartylglucosaminidase                                                                                                                                                                                        | Aga                             | 0.588 | 0.458 | 0.328 | 0.005 | 0.555 | 0.014 | 0.394 | 0.007 |
| 1398795_at   | NM_053799 | aspartyl-tRNA synthetase                                                                                                                                                                                       | Dars                            | 0.788 | 0.667 | 1.023 | 0.633 | 0.700 | 0.353 | 1.167 | 0.323 |
| 1376135_at   | BI294730  | aspartyl-tRNA synthetase 2 (mitochondrial)                                                                                                                                                                     | Dars2                           | 1.001 | 0.715 | 0.992 | 0.952 | 1.063 | 0.568 | 0.767 | 0.505 |
| 1388963_at   | AI102087  | astrotactin 1                                                                                                                                                                                                  | Astn1                           | 0.688 | 0.087 | 0.168 | 0.016 | 0.691 | 0.008 | 0.304 | 0.026 |
| 1392502_at   | BI275796  | AT hook containing transcription factor 1 (predicted)                                                                                                                                                          | Ahctf1_predicted                | 1.231 | 0.166 | 1.716 | 0.005 | 1.409 | 0.201 | 1.657 | 0.017 |
| 1381611_at   | BF396355  | AT hook containing transcription factor 1 (predicted)                                                                                                                                                          | Ahctf1_predicted                | 0.979 | 0.517 | 1.138 | 0.442 | 1.076 | 0.907 | 1.321 | 0.313 |
| 1389850_at   | AA900926  | AT rich interactive domain 1A (Swi1 like) (predicted)                                                                                                                                                          | Arid1a_predicted                | 1.362 | 0.138 | 0.919 | 0.242 | 0.806 | 0.959 | 0.747 | 0.000 |
| 1375524_at   | AA956714  | AT rich interactive domain 1A (Swi1 like) (predicted)                                                                                                                                                          | Arid1a_predicted                | 1.063 | 0.186 | 1.617 | 0.066 | 1.331 | 0.300 | 1.168 | 0.197 |
| 1382441_at   | AI556402  | AT rich interactive domain 1B (Swi1 like)                                                                                                                                                                      | Arid1b                          | 0.986 | 0.476 | 0.774 | 0.010 | 0.943 | 0.248 | 0.818 | 0.011 |
| 1381925_x_at | AI412401  | AT rich interactive domain 1B (Swi1 like) /// hypothetical gene supported by NM_172157                                                                                                                         | Arid1b /// LOC497729            | 1.144 | 0.041 | 0.808 | 0.020 | 0.981 | 0.813 | 0.879 | 0.053 |
| 1397667_at   | BG667685  | AT rich interactive domain 1B (Swi1 like) /// hypothetical gene supported by NM_172157                                                                                                                         | Arid1b /// LOC497729            | 0.994 | 0.900 | 0.506 | 0.051 | 0.999 | 0.918 | 0.503 | 0.052 |
| 1379188_at   | BI289741  | AT rich interactive domain 2 (Arid-rfx like) (predicted)                                                                                                                                                       | Arid2_predicted                 | 0.923 | 0.450 | 0.862 | 0.446 | 1.222 | 0.406 | 0.999 | 0.709 |
| 1379112_at   | AW528085  | AT rich interactive domain 4A (Rbp1 like) (predicted)                                                                                                                                                          | Arid4a_predicted                | 0.915 | 0.138 | 1.024 | 0.672 | 0.648 | 0.123 | 0.966 | 0.981 |
| 1376523_at   | BF391127  | AT rich interactive domain 4A (Rbp1 like) (predicted)                                                                                                                                                          | Arid4a_predicted                | 0.529 | 0.422 | 0.874 | 0.959 | 0.771 | 0.979 | 0.895 | 0.984 |
| 1368837_at   | NM_053421 | AT rich interactive domain 4B (Rbp1 like)                                                                                                                                                                      | Arid4b                          | 1.214 | 0.096 | 0.730 | 0.022 | 1.023 | 0.848 | 0.751 | 0.113 |
| 1381151_at   | BF386697  | AT rich interactive domain 4B (Rbp1 like)                                                                                                                                                                      | Arid4b                          | 1.103 | 0.174 | 1.565 | 0.465 | 1.696 | 0.173 | 0.876 | 0.334 |
| 1379311_at   | AII77813  | AT rich interactive domain 5A (Mrf1 like)                                                                                                                                                                      | Arid5a                          | 2.267 | 0.026 | 1.499 | 0.019 | 4.710 | 0.002 | 1.934 | 0.001 |
| 1382312_at   | AW530903  | AT rich interactive domain 5B (Mrf1 like) (predicted)                                                                                                                                                          | Arid5b_predicted                | 2.878 | 0.040 | 1.176 | 0.491 | 2.243 | 0.014 | 0.835 | 0.492 |
| 1381944_at   | BF387066  | Ataxia, cerebellar, Cayman type (caytaxin) (predicted)                                                                                                                                                         | Atcay_predicted                 | 1.451 | 0.931 | 1.088 | 0.860 | 1.486 | 0.051 | 1.200 | 0.950 |
| 1369709_at   | NM_012726 | ataxin 1                                                                                                                                                                                                       | Atxn1                           | 1.224 | 0.194 | 1.947 | 0.682 | 1.002 | 0.995 | 0.916 | 0.992 |
| 1398874_at   | BI274345  | ataxin 10                                                                                                                                                                                                      | Atxn10                          | 0.449 | 0.089 | 0.816 | 0.093 | 0.563 | 0.001 | 0.804 | 0.094 |
| 1377138_at   | AI709547  | Ataxin 10                                                                                                                                                                                                      | Atxn10                          | 1.132 | 0.978 | 1.148 | 0.027 | 1.191 | 0.981 | 0.899 | 0.920 |
| 1391158_a_at | BE109041  | ataxin 2 (predicted)                                                                                                                                                                                           | Atxn2_predicted                 | 0.839 | 0.142 | 1.000 | 0.848 | 0.763 | 0.063 | 0.879 | 0.011 |
| 1388826_at   | BE349657  | ataxin 2-like (predicted)                                                                                                                                                                                      | Atxn2l_predicted                | 0.689 | 0.020 | 1.631 | 0.005 | 1.176 | 0.441 | 1.287 | 0.009 |
| 1390294_at   | BE100986  | Ataxin 7-like 4 (predicted)                                                                                                                                                                                    | Atxn7l4_predicted               | 0.277 | 0.042 | 0.813 | 0.796 | 0.278 | 0.007 | 1.070 | 0.662 |
| 1372375_at   | BF395615  | ATG16 autophagy related 16-like 1 (S. cerevisiae) (predicted)                                                                                                                                                  | Atg16l1_predicted               | 0.674 | 0.029 | 1.440 | 0.082 | 0.912 | 0.609 | 1.230 | 0.048 |
| 1391064_at   | BI295177  | ATG16 autophagy related 16-like 2 (S. cerevisiae) (predicted)                                                                                                                                                  | Atg16l2_predicted               | 1.076 | 0.983 | 0.897 | 0.042 | 1.248 | 0.681 | 0.885 | 0.012 |
| 1374831_at   | AII72579  | ATH1, acid trehalase-like 1 (yeast) (predicted)                                                                                                                                                                | Ath1l_predicted                 | 0.768 | 0.058 | 0.285 | 0.034 | 1.442 | 0.580 | 0.383 | 0.016 |
| 1374922_at   | AI013096  | ATP binding domain 1 family, member B (predicted)                                                                                                                                                              | Atpbd1b_predicted               | 1.077 | 0.783 | 1.845 | 0.037 | 1.110 | 0.261 | 1.526 | 0.004 |
| 1393604_at   | BE106064  | ATP binding domain 1 family, member C                                                                                                                                                                          | Atpbd1c                         | 0.850 | 0.503 | 0.742 | 0.237 | 0.831 | 0.503 | 0.741 | 0.230 |
| 1367854_at   | NM_016987 | ATP citrate lyase                                                                                                                                                                                              | Acly                            | 0.609 | 0.001 | 0.609 | 0.000 | 0.665 | 0.001 | 0.714 | 0.030 |
| 1371892_at   | BI274263  | ATP synthase mitochondrial F1 complex assembly factor 2 (predicted)                                                                                                                                            | Atpaf2_predicted                | 1.367 | 0.446 | 0.795 | 0.102 | 1.635 | 0.043 | 1.210 | 0.011 |
| 1398855_at   | AA893531  | ATP synthase, H+ transporting, mitochondrial F0 complex, subunit b, isoform 1                                                                                                                                  | Atp5f1                          | 0.589 | 0.384 | 0.714 | 0.033 | 0.559 | 0.095 | 0.694 | 0.008 |
| 1367620_at   | NM_053756 | ATP synthase, H+ transporting, mitochondrial F0 complex, subunit c (subunit 9) isoform 3                                                                                                                       | Atp5g3                          | 0.835 | 0.574 | 0.869 | 0.024 | 0.684 | 0.059 | 0.859 | 0.022 |
| 1367599_at   | NM_017311 | ATP synthase, H+ transporting, mitochondrial F0 complex, subunit c (subunit 9), isoform 1                                                                                                                      | Atp5g1                          | 0.618 | 0.346 | 0.745 | 0.042 | 0.560 | 0.006 | 0.681 | 0.108 |
| 1370207_at   | AI170772  | ATP synthase, H+ transporting, mitochondrial F0 complex, subunit c (subunit 9), isoform 2 /// similar to ATP synthase, H+ transporting, mitochondrial F0 complex, subunit c (subunit 9), isoform 2 (predicted) | Atp5g2 /// RGD1566212_predicted | 0.664 | 0.824 | 1.023 | 0.243 | 0.496 | 0.340 | 0.923 | 0.135 |
| 1367622_at   | NM_019383 | ATP synthase, H+ transporting, mitochondrial F0 complex, subunit d                                                                                                                                             | Atp5h                           | 0.749 | 0.208 | 0.810 | 0.034 | 0.629 | 0.023 | 0.673 | 0.069 |
| 1387019_at   | NM_080481 | ATP synthase, H+ transporting, mitochondrial F0 complex, subunit e                                                                                                                                             | Atp5i                           | 0.716 | 0.932 | 0.794 | 0.033 | 1.206 | 0.855 | 0.857 | 0.354 |
| 1370230_at   | BG666602  | ATP synthase, H+ transporting, mitochondrial F0 complex, subunit F6                                                                                                                                            | Atp5j                           | 0.840 | 0.444 | 0.770 | 0.067 | 0.957 | 0.715 | 0.855 | 0.036 |
| 1370378_at   | J05266    | ATP synthase, H+ transporting, mitochondrial F1 complex, alpha subunit, isoform 1                                                                                                                              | Atp5a1                          | 0.449 | 0.292 | 0.438 | 0.001 | 0.528 | 0.175 | 0.539 | 0.004 |
| 1370275_at   | M19044    | ATP synthase, H+ transporting, mitochondrial F1 complex, beta polypeptide                                                                                                                                      | Atp5b                           | 0.711 | 0.227 | 0.972 | 0.296 | 0.638 | 0.021 | 0.918 | 0.023 |
| 1380070_at   | BG377244  | ATP synthase, H+ transporting, mitochondrial F1 complex, beta polypeptide                                                                                                                                      | Atp5b                           | 0.787 | 0.515 | 0.785 | 0.065 | 0.748 | 0.134 | 0.807 | 0.264 |
| 1370278_at   | U00926    | ATP synthase, H+ transporting, mitochondrial F1 complex, delta subunit                                                                                                                                         | Atp5d                           | 0.603 | 0.430 | 0.828 | 0.302 | 0.479 | 0.001 | 0.857 | 0.291 |
| 1370284_at   | AF010323  | ATP synthase, H+ transporting, mitochondrial F1 complex, epsilon subunit                                                                                                                                       | Atp5e                           | 0.847 | 0.790 | 0.593 | 0.009 | 0.791 | 0.011 | 0.570 | 0.202 |
| 1370918_a_at | BI275939  | ATP synthase, H+ transporting, mitochondrial F1 complex, gamma polypeptide 1                                                                                                                                   | Atp5c1                          | 0.534 | 0.206 | 0.693 | 0.003 | 0.412 | 0.032 | 0.672 | 0.003 |
| 1370276_at   | D13127    | ATP synthase, H+ transporting, mitochondrial F1 complex, O subunit                                                                                                                                             | Atp5o                           | 0.606 | 0.368 | 0.610 | 0.048 | 0.485 | 0.015 | 0.665 | 0.027 |
| 1380339_at   | AW520369  | ATP/GTP binding protein 1 (predicted)                                                                                                                                                                          | Agtpbb1_predicted               | 1.001 | 0.415 | 1.539 | 0.009 | 1.001 | 0.577 | 0.998 | 0.985 |
| 1391891_at   | AI711114  | ATP/GTP binding protein 1 (predicted)                                                                                                                                                                          | Agtpbb1_predicted               | 0.954 | 0.564 | 1.575 | 0.028 | 0.924 | 0.458 | 1.019 | 0.533 |
| 1373378_at   | BF410522  | ATP/GTP binding protein 1 (predicted)                                                                                                                                                                          | Agtpbb1_predicted               | 0.858 | 0.610 | 1.528 | 0.014 | 0.822 | 0.272 | 1.484 | 0.046 |
| 1379561_at   | AW433567  | ATPase family, AAA domain containing 1                                                                                                                                                                         | Atad1                           | 3.045 | 0.011 | 1.431 | 0.030 | 4.072 | 0.001 | 2.128 | 0.007 |

|              |           |                                                                                                                    |                     |        |       |        |       |        |       |        |       |
|--------------|-----------|--------------------------------------------------------------------------------------------------------------------|---------------------|--------|-------|--------|-------|--------|-------|--------|-------|
| 1376599_at   | AW915567  | ATPase family, AAA domain containing 2 (predicted)                                                                 | Atad2_predicted     | 0.886  | 0.246 | 0.675  | 0.085 | 0.632  | 0.321 | 0.673  | 0.089 |
| 1369588_a_at | NM_012915 | ATPase inhibitory factor 1                                                                                         | Atpif1              | 1.135  | 0.442 | 1.136  | 0.903 | 1.031  | 0.645 | 1.086  | 0.901 |
| 1371229_at   | M35300    | ATPase inhibitory factor 1                                                                                         | Atpif1              | 1.104  | 0.956 | 1.209  | 0.078 | 0.833  | 0.299 | 1.127  | 0.400 |
| 1371925_at   | AA893621  | ATPase type 13A1 (predicted)                                                                                       | Atp13a1_predicted   | 1.746  | 0.005 | 1.613  | 0.002 | 2.438  | 0.021 | 2.101  | 0.025 |
| 1396884_at   | BF404113  | ATPase, aminophospholipid transporter (APLT), class I, type 8A, member 1 (predicted)                               | Atp8a1_predicted    | 4.200  | 0.021 | 1.022  | 0.572 | 4.106  | 0.218 | 1.534  | 0.884 |
| 1398164_at   | BF406182  | ATPase, aminophospholipid transporter (APLT), class I, type 8A, member 1 (predicted)                               | Atp8a1_predicted    | 1.508  | 0.056 | 1.002  | 0.451 | 0.961  | 0.987 | 0.962  | 0.914 |
| 1393515_at   | AI145077  | ATPase, aminophospholipid transporter (APLT), class I, type 8A, member 1 (predicted)                               | Atp8a1_predicted    | 1.490  | 0.432 | 0.774  | 0.767 | 1.009  | 0.397 | 1.005  | 0.998 |
| 1370426_a_at | AI175492  | ATPase, Ca++ transporting, cardiac muscle, slow twitch 2                                                           | Atp2a2              | 0.514  | 0.026 | 0.626  | 0.002 | 0.523  | 0.020 | 0.650  | 0.006 |
| 1398862_at   | J04024    | ATPase, Ca++ transporting, cardiac muscle, slow twitch 2                                                           | Atp2a2              | 0.410  | 0.026 | 0.507  | 0.040 | 0.336  | 0.012 | 0.518  | 0.018 |
| 1369065_a_at | NM_017290 | ATPase, Ca++ transporting, cardiac muscle, slow twitch 2                                                           | Atp2a2              | 0.397  | 0.045 | 0.214  | 0.002 | 0.453  | 0.023 | 0.248  | 0.020 |
| 1397224_at   | AW534277  | ATPase, Ca++ transporting, plasma membrane 1                                                                       | Atp2b1              | 0.613  | 0.007 | 0.525  | 0.004 | 0.598  | 0.010 | 0.500  | 0.008 |
| 1370050_at   | NM_053311 | ATPase, Ca++ transporting, plasma membrane 1                                                                       | Atp2b1              | 0.571  | 0.070 | 0.778  | 0.063 | 0.734  | 0.191 | 0.764  | 0.029 |
| 1394714_at   | BF386268  | ATPase, Ca++ transporting, plasma membrane 1                                                                       | Atp2b1              | 0.517  | 0.123 | 1.694  | 0.511 | 1.159  | 0.608 | 1.309  | 0.325 |
| 1386426_at   | AI137869  | ATPase, Ca++ transporting, plasma membrane 1                                                                       | Atp2b1              | 0.568  | 0.136 | 1.045  | 0.863 | 0.661  | 0.076 | 0.915  | 0.934 |
| 1380195_at   | AI145357  | ATPase, Ca++ transporting, plasma membrane 1                                                                       | Atp2b1              | 0.787  | 0.654 | 2.362  | 0.165 | 0.976  | 0.851 | 1.038  | 0.901 |
| 1368698_at   | J03754    | ATPase, Ca++ transporting, plasma membrane 2                                                                       | Atp2b2              | 0.164  | 0.009 | 0.076  | 0.000 | 0.506  | 0.031 | 0.062  | 0.023 |
| 1368477_at   | NM_012914 | ATPase, Ca++ transporting, ubiquitous                                                                              | Atp2a3              | 1.294  | 0.001 | 0.748  | 0.041 | 1.206  | 0.017 | 0.762  | 0.191 |
| 1371165_a_at | AF458230  | ATPase, Ca++ transporting, ubiquitous                                                                              | Atp2a3              | 2.119  | 0.115 | 0.360  | 0.091 | 1.536  | 0.997 | 0.285  | 0.061 |
| 1377386_at   | AI029639  | ATPase, Ca+++-sequestering                                                                                         | Atp2c1              | 2.183  | 0.028 | 1.540  | 0.101 | 1.252  | 0.052 | 1.280  | 0.849 |
| 1387126_at   | NM_131907 | ATPase, Ca+++-sequestering                                                                                         | Atp2c1              | 0.784  | 0.359 | 0.440  | 0.023 | 0.867  | 0.240 | 0.604  | 0.002 |
| 1391693_at   | BM384161  | ATPase, Class I, type 8B, member 1 (predicted)                                                                     | Atp8b1_predicted    | 1.516  | 0.344 | 1.438  | 0.281 | 0.953  | 0.997 | 0.303  | 0.048 |
| 1398755_at   | NM_130823 | ATPase, H transporting, lysosomal V0 subunit c                                                                     | Atp6v0c             | 0.995  | 0.805 | 1.480  | 0.095 | 0.635  | 0.093 | 1.276  | 0.484 |
| 1374431_at   | BE120644  | ATPase, H transporting, lysosomal V1 subunit A (predicted)                                                         | Atp6v1a1_predicted  | 0.867  | 0.072 | 0.630  | 0.002 | 0.792  | 0.195 | 0.886  | 0.054 |
| 1382048_at   | BI289589  | ATPase, H transporting, lysosomal V1 subunit A (predicted)                                                         | Atp6v1a1_predicted  | 0.816  | 0.934 | 0.653  | 0.132 | 0.840  | 0.464 | 0.799  | 0.463 |
| 1387664_at   | NM_057213 | ATPase, H transporting, lysosomal V1 subunit B2                                                                    | Atp6v1b2            | 1.118  | 0.634 | 5.359  | 0.002 | 1.035  | 0.549 | 4.367  | 0.002 |
| 1371402_at   | BM390600  | ATPase, H transporting, lysosomal V1 subunit B2                                                                    | Atp6v1b2            | 1.026  | 0.724 | 1.190  | 0.014 | 1.007  | 0.152 | 1.210  | 0.057 |
| 1398781_at   | NM_053884 | ATPase, H transporting, lysosomal V1 subunit F                                                                     | Atp6v1f             | 0.975  | 0.968 | 1.572  | 0.029 | 0.707  | 0.039 | 1.396  | 0.198 |
| 1367873_at   | NM_031785 | ATPase, H+ transporting, lysosomal accessory protein 1                                                             | Atp6ap1             | 0.825  | 0.088 | 0.743  | 0.162 | 0.680  | 0.014 | 0.640  | 0.027 |
| 1379255_at   | AI012226  | ATPase, H+ transporting, lysosomal accessory protein 2                                                             | Atp6ap2             | 1.082  | 0.393 | 1.572  | 0.001 | 0.902  | 0.492 | 1.446  | 0.001 |
| 1396279_at   | BG663051  | ATPase, H+ transporting, lysosomal accessory protein 2                                                             | Atp6ap2             | 0.672  | 0.997 | 1.234  | 0.235 | 1.112  | 0.921 | 1.255  | 0.279 |
| 1380730_at   | BE110564  | ATPase, H+ transporting, lysosomal V0 subunit a isoform 2 (predicted)                                              | Atp6v0a2_predicted  | 0.752  | 0.073 | 1.359  | 0.094 | 1.350  | 0.107 | 0.786  | 0.345 |
| 1382576_at   | BE349645  | ATPase, H+ transporting, lysosomal V0 subunit a isoform 2 (predicted)                                              | Atp6v0a2_predicted  | 0.635  | 0.130 | 0.939  | 0.020 | 0.636  | 0.112 | 0.901  | 0.026 |
| 1372648_at   | BI291338  | ATPase, H+ transporting, lysosomal V0 subunit a isoform 2 (predicted)                                              | Atp6v0a2_predicted  | 1.029  | 0.788 | 0.775  | 0.244 | 0.804  | 0.637 | 0.678  | 0.280 |
| 1387045_at   | NM_031604 | ATPase, H+ transporting, lysosomal V0 subunit A1                                                                   | Atp6v0a1            | 0.725  | 0.040 | 0.682  | 0.044 | 0.948  | 0.286 | 0.898  | 0.160 |
| 1398930_at   | BI278546  | ATPase, H+ transporting, V0 subunit B (predicted)                                                                  | Atp6v0b_predicted   | 0.983  | 0.602 | 1.741  | 0.003 | 0.866  | 0.022 | 1.621  | 0.015 |
| 1388365_at   | BI276424  | ATPase, H+ transporting, V0 subunit D isoform 1                                                                    | Atp6v0d1            | 0.659  | 0.225 | 0.632  | 0.000 | 0.699  | 0.017 | 0.763  | 0.002 |
| 1367724_a_at | NM_053578 | ATPase, H+ transporting, V0 subunit E isoform 1                                                                    | Atp6v0e1            | 0.796  | 0.762 | 0.812  | 0.011 | 0.731  | 0.039 | 0.812  | 0.083 |
| 1372907_at   | BI285242  | ATPase, H+ transporting, V0 subunit E isoform 2                                                                    | Atp6v0e2            | 0.506  | 0.176 | 0.917  | 0.718 | 0.595  | 0.004 | 0.924  | 0.127 |
| 1374396_at   | BI293306  | ATPase, H+ transporting, V1 subunit C, isoform 1                                                                   | Atp6v1c1            | 0.864  | 0.175 | 2.195  | 0.001 | 0.657  | 0.071 | 1.691  | 0.026 |
| 1388325_at   | BF281358  | ATPase, H+ transporting, V1 subunit D                                                                              | Atp6v1d             | 0.863  | 0.123 | 1.980  | 0.000 | 0.756  | 0.008 | 1.951  | 0.004 |
| 1371564_at   | AI169159  | ATPase, H+ transporting, V1 subunit E isoform 1                                                                    | Atp6v1e1            | 0.615  | 0.212 | 0.870  | 0.081 | 0.626  | 0.031 | 0.935  | 0.440 |
| 1367585_a_at | M28647    | ATPase, Na+/K+ transporting, alpha 1 polypeptide                                                                   | Atp1a1              | 0.552  | 0.697 | 0.507  | 0.004 | 0.532  | 0.133 | 0.726  | 0.011 |
| 1386911_at   | NM_012505 | ATPase, Na+/K+ transporting, alpha 2 polypeptide                                                                   | Atp1a2              | 0.967  | 0.067 | 1.001  | 0.977 | 0.968  | 0.070 | 0.965  | 0.974 |
| 1367814_at   | M14137    | ATPase, Na+/K+ transporting, beta 1 polypeptide                                                                    | Atp1b1              | 0.619  | 0.275 | 0.777  | 0.008 | 0.658  | 0.060 | 0.705  | 0.022 |
| 1386937_at   | AI232036  | ATPase, Na+/K+ transporting, beta 1 polypeptide                                                                    | Atp1b1              | 0.556  | 0.280 | 0.576  | 0.000 | 0.588  | 0.077 | 0.640  | 0.001 |
| 1377195_at   | BF406252  | ATPase, Na+/K+ transporting, beta 3 polypeptide                                                                    | Atp1b3              | 0.532  | 0.013 | 1.367  | 0.153 | 0.916  | 0.448 | 1.529  | 0.068 |
| 1398300_at   | BI303655  | ATPase, Na+/K+ transporting, beta 3 polypeptide                                                                    | Atp1b3              | 0.516  | 0.327 | 0.612  | 0.015 | 0.451  | 0.088 | 0.622  | 0.030 |
| 1394490_at   | AI502114  | ATP-binding cassette, sub-family A (ABC1), member 1                                                                | Abca1               | 1.012  | 0.981 | 0.379  | 0.000 | 0.902  | 0.509 | 0.353  | 0.028 |
| 1383355_at   | AW918387  | ATP-binding cassette, sub-family A (ABC1), member 1 /// hypothetical gene supported by NM_178095                   | Abca1 /// LOC497803 | 1.180  | 0.395 | 3.216  | 0.010 | 0.753  | 0.273 | 2.261  | 0.004 |
| 1384381_at   | BF284523  | ATP-binding cassette, sub-family A (ABC1), member 1 /// hypothetical gene supported by NM_178095                   | Abca1 /// LOC497803 | 1.843  | 0.882 | 3.309  | 0.220 | 0.711  | 0.602 | 1.310  | 0.494 |
| 1368081_at   | NM_024396 | ATP-binding cassette, sub-family A (ABC1), member 2                                                                | Abca2               | 0.826  | 0.219 | 0.753  | 0.069 | 0.803  | 0.089 | 0.789  | 0.005 |
| 1384469_at   | AI502224  | ATP-binding cassette, sub-family A (ABC1), member 5                                                                | Abca5               | 0.880  | 0.350 | 0.989  | 0.397 | 0.985  | 0.497 | 1.010  | 0.858 |
| 1383229_at   | BE103071  | ATP-binding cassette, sub-family A (ABC1), member 7                                                                | Abca7               | 0.945  | 0.809 | 0.719  | 0.325 | 1.128  | 0.618 | 1.047  | 0.276 |
| 1370583_s_at | AY082609  | ATP-binding cassette, sub-family B (MDR/TAP), member 1 /// ATP-binding cassette, sub-family B (MDR/TAP), member 1A | Abcb1 /// Abcb1a    | 10.503 | 0.017 | 10.515 | 0.001 | 32.801 | 0.003 | 23.157 | 0.001 |
| 1390781_at   | AA900411  | ATP-binding cassette, sub-family B (MDR/TAP), member 10                                                            | Abcb10              | 0.660  | 0.185 | 0.590  | 0.968 | 0.680  | 0.991 | 1.155  | 0.763 |
| 1370465_at   | AF257746  | ATP-binding cassette, sub-family B (MDR/TAP), member 1A                                                            | Abcb1a              | 4.832  | 0.021 | 17.261 | 0.001 | 6.314  | 0.006 | 14.199 | 0.005 |
| 1370464_at   | AF286167  | ATP-binding cassette, sub-family B (MDR/TAP), member 1A                                                            | Abcb1a              | 1.375  | 0.027 | 9.620  | 0.001 | 1.913  | 0.009 | 4.538  | 0.003 |
| 1369161_at   | NM_012690 | ATP-binding cassette, sub-family B (MDR/TAP), member 4                                                             | Abcb4               | 2.633  | 0.112 | 1.346  | 0.340 | 2.215  | 0.035 | 1.233  | 0.322 |
| 1368159_at   | NM_080582 | ATP-binding cassette, sub-family B (MDR/TAP), member 6                                                             | Abcb6               | 0.255  | 0.033 | 1.082  | 0.182 | 0.324  | 0.075 | 0.943  | 0.166 |
| 1368484_at   | NM_022238 | ATP-binding cassette, sub-family B (MDR/TAP), member 9                                                             | Abcb9               | 0.806  | 0.591 | 0.520  | 0.005 | 0.811  | 0.630 | 0.547  | 0.001 |

|              |           |                                                                  |                  |        |       |        |       |        |       |        |       |
|--------------|-----------|------------------------------------------------------------------|------------------|--------|-------|--------|-------|--------|-------|--------|-------|
| 1371005_at   | AI059506  | ATP-binding cassette, sub-family C (CFTR/MRP), member 1          | Abcc1            | 1.871  | 0.122 | 2.604  | 0.046 | 3.367  | 0.025 | 2.608  | 0.002 |
| 1381500_at   | BF386748  | ATP-binding cassette, sub-family C (CFTR/MRP), member 1          | Abcc1            | 1.077  | 0.382 | 1.465  | 0.136 | 1.498  | 0.154 | 1.158  | 0.523 |
| 1369698_at   | AF072816  | ATP-binding cassette, sub-family C (CFTR/MRP), member 3          | Abcc3            | 1.649  | 0.046 | 1.214  | 0.020 | 1.363  | 0.041 | 1.287  | 0.032 |
| 1379402_at   | BE100533  | ATP-binding cassette, sub-family C (CFTR/MRP), member 4          | Abcc4            | 0.415  | 0.053 | 0.733  | 0.138 | 0.972  | 0.851 | 1.203  | 0.367 |
| 1387030_at   | NM_053924 | ATP-binding cassette, sub-family C (CFTR/MRP), member 5          | Abcc5            | 1.957  | 0.121 | 1.230  | 0.453 | 3.266  | 0.022 | 1.423  | 0.475 |
| 1389886_at   | AI406942  | ATP-binding cassette, sub-family C (CFTR/MRP), member 5          | Abcc5            | 1.000  | 0.847 | 0.958  | 0.706 | 1.676  | 0.058 | 0.956  | 0.465 |
| 1391178_at   | BE110066  | ATP-binding cassette, sub-family C (CFTR/MRP), member 8          | Abcc8            | 0.797  | 0.492 | 0.796  | 0.509 | 1.673  | 0.325 | 1.275  | 0.439 |
| 1369632_a_at | AB052294  | ATP-binding cassette, sub-family C (CFTR/MRP), member 8          | Abcc8            | 1.030  | 0.551 | 0.647  | 0.073 | 0.905  | 0.545 | 0.541  | 0.054 |
| 1368561_at   | NM_033352 | ATP-binding cassette, sub-family D (ALD), member 2               | Abcd2            | 1.327  | 0.621 | 0.278  | 0.055 | 0.977  | 0.917 | 0.627  | 0.143 |
| 1368057_at   | NM_012804 | ATP-binding cassette, sub-family D (ALD), member 3               | Abcd3            | 0.382  | 0.003 | 0.202  | 0.001 | 0.479  | 0.003 | 0.261  | 0.008 |
| 1392570_at   | BI295850  | ATP-binding cassette, sub-family D (ALD), member 4               | Abcd4            | 0.984  | 0.843 | 1.007  | 0.830 | 1.003  | 0.933 | 1.010  | 0.572 |
| 1388810_at   | BI278966  | ATP-binding cassette, sub-family E (OABP), member 1              | Abce1            | 0.661  | 0.153 | 0.862  | 0.866 | 0.733  | 0.082 | 0.871  | 0.806 |
| 1398876_at   | BG380494  | ATP-binding cassette, sub-family F (GCN20), member 1             | Abcf1            | 0.684  | 0.147 | 1.314  | 0.040 | 0.898  | 0.110 | 1.363  | 0.323 |
| 1389608_at   | AI235192  | ATP-binding cassette, sub-family F (GCN20), member 2 (predicted) | Abcf2_predicted  | 0.900  | 0.682 | 1.240  | 0.114 | 0.762  | 0.541 | 1.217  | 0.015 |
| 1371456_at   | BI281218  | ATP-binding cassette, sub-family F (GCN20), member 3             | Abcf3            | 0.626  | 0.196 | 1.159  | 0.102 | 0.607  | 0.017 | 0.987  | 0.529 |
| 1377280_at   | BF390931  | ATP-binding cassette, sub-family F (GCN20), member 3             | Abcf3            | 0.997  | 0.689 | 0.970  | 0.416 | 0.999  | 0.885 | 0.967  | 0.446 |
| 1368103_at   | NM_053502 | ATP-binding cassette, sub-family G (WHITE), member 1             | Abcg1            | 1.592  | 0.058 | 1.117  | 0.268 | 1.935  | 0.017 | 1.530  | 0.017 |
| 1373995_at   | AW523571  | ATP-binding cassette, sub-family G (WHITE), member 1             | Abcg1            | 1.766  | 0.127 | 0.276  | 0.166 | 2.591  | 0.001 | 0.585  | 0.639 |
| 1380577_at   | AI175616  | ATP-binding cassette, sub-family G (WHITE), member 2             | Abcg2            | 0.907  | 0.540 | 0.999  | 0.907 | 1.318  | 0.010 | 1.005  | 0.744 |
| 1393217_at   | BF282804  | ATP-binding cassette, sub-family G (WHITE), member 3             | Abcg3            | 8.229  | 0.000 | 2.614  | 0.002 | 14.391 | 0.000 | 3.583  | 0.001 |
| 1386972_at   | NM_017228 | atrophin 1                                                       | Atn1             | 1.395  | 0.004 | 1.771  | 0.017 | 0.910  | 0.749 | 1.288  | 0.043 |
| 1387127_at   | NM_031351 | attractin                                                        | Atrn             | 0.576  | 0.132 | 0.389  | 0.006 | 0.528  | 0.035 | 0.380  | 0.003 |
| 1367945_at   | NM_053359 | ATX1 (antioxidant protein 1) homolog 1 (yeast)                   | Atox1            | 0.639  | 0.825 | 0.591  | 0.012 | 0.739  | 0.145 | 0.497  | 0.095 |
| 1372149_at   | BM389502  | AU RNA binding protein/enoyl-coenzyme A hydratase (predicted)    | Auh_predicted    | 0.768  | 0.387 | 0.484  | 0.032 | 1.014  | 0.968 | 0.531  | 0.083 |
| 1398916_at   | AI104388  | aurora kinase A interacting protein 1                            | Aurkaip1         | 0.662  | 0.064 | 1.430  | 0.004 | 0.611  | 0.023 | 1.378  | 0.007 |
| 1375008_at   | BF410389  | aurora kinase C (predicted)                                      | Aurkc_predicted  | 0.699  | 0.274 | 1.149  | 0.520 | 0.873  | 0.334 | 1.034  | 0.363 |
| 1371614_at   | AI169001  | autophagy-related 12 (yeast)                                     | Atg12            | 1.013  | 0.706 | 1.966  | 0.001 | 0.729  | 0.071 | 1.734  | 0.003 |
| 1382735_at   | BF563278  | autophagy-related 12 (yeast)                                     | Atg12            | 0.906  | 0.847 | 2.085  | 0.048 | 0.841  | 0.608 | 1.768  | 0.079 |
| 1399042_at   | AI228455  | autophagy-related 4B (yeast)                                     | Atg4b            | 0.725  | 0.018 | 1.788  | 0.014 | 0.573  | 0.011 | 1.208  | 0.154 |
| 1389273_at   | BG374362  | autophagy-related 4B (yeast)                                     | Atg4b            | 0.554  | 0.186 | 0.497  | 0.001 | 0.598  | 0.237 | 0.937  | 0.092 |
| 1392744_at   | AI179130  | autophagy-related 7 (yeast)                                      | Atg7             | 1.032  | 0.140 | 0.996  | 0.084 | 1.161  | 0.069 | 1.009  | 0.931 |
| 1387056_at   | NM_024405 | axin 1                                                           | Axin1            | 1.136  | 0.433 | 1.790  | 0.021 | 1.098  | 0.879 | 1.389  | 0.071 |
| 1368291_at   | NM_021752 | baculoviral IAP repeat-containing 2                              | Birc2            | 2.744  | 0.143 | 3.049  | 0.000 | 3.160  | 0.021 | 2.160  | 0.018 |
| 1370113_at   | NM_023987 | baculoviral IAP repeat-containing 3                              | Birc3            | 75.086 | 0.002 | 52.503 | 0.000 | 75.272 | 0.001 | 52.961 | 0.000 |
| 1369248_a_at | AF304333  | baculoviral IAP repeat-containing 4                              | Birc4            | 0.998  | 0.989 | 1.017  | 0.493 | 1.558  | 0.058 | 1.000  | 0.998 |
| 1381871_at   | BM383359  | BAI1-associated protein 1 (predicted)                            | Baiap1_predicted | 2.014  | 0.084 | 1.042  | 0.869 | 0.927  | 0.913 | 1.000  | 0.065 |
| 1375941_at   | BI292120  | BAI1-associated protein 2-like 1                                 | Baiap2l1         | 3.099  | 0.032 | 2.447  | 0.002 | 2.724  | 0.010 | 2.120  | 0.010 |
| 1368509_at   | NM_053618 | Bardet-Biedl syndrome 2 homolog (human)                          | Bbs2             | 0.498  | 0.007 | 0.236  | 0.000 | 0.563  | 0.232 | 0.529  | 0.006 |
| 1378656_at   | BE105572  | Bardet-Biedl syndrome 5 homolog (human) (predicted)              | Bbs5_predicted   | 1.010  | 0.721 | 1.106  | 0.904 | 0.740  | 0.046 | 0.755  | 0.104 |
| 1380515_at   | AI170730  | Bardet-Biedl syndrome 7                                          | Bbs7             | 1.146  | 0.714 | 1.198  | 0.139 | 0.737  | 0.533 | 1.226  | 0.939 |
| 1367820_at   | NM_053631 | barrier to autointegration factor 1                              | Banf1            | 1.036  | 0.824 | 1.716  | 0.010 | 0.942  | 0.700 | 2.083  | 0.007 |
| 1387212_at   | NM_012863 | basic helix-loop-helix domain containing, class B, 8             | Bhlhb8           | 0.365  | 0.014 | 0.818  | 0.978 | 0.363  | 0.016 | 0.852  | 0.144 |
| 1381121_at   | AW533010  | Basic helix-loop-helix domain containing, class B2               | Bhlhb2           | 2.526  | 0.012 | 7.293  | 0.000 | 1.929  | 0.169 | 2.230  | 0.052 |
| 1379483_at   | AI548256  | Basic helix-loop-helix domain containing, class B2               | Bhlhb2           | 4.066  | 0.081 | 10.401 | 0.017 | 2.279  | 0.210 | 9.229  | 0.014 |
| 1369415_at   | NM_053328 | basic helix-loop-helix domain containing, class B2               | Bhlhb2           | 1.177  | 0.681 | 6.317  | 0.016 | 1.060  | 0.396 | 3.691  | 0.004 |
| 1368511_at   | NM_133303 | basic helix-loop-helix domain containing, class B3               | Bhlhb3           | 1.135  | 0.033 | 3.370  | 0.001 | 0.722  | 0.479 | 2.833  | 0.005 |
| 1388554_at   | AI229287  | basic leucine zipper and W2 domains 1                            | Bzw1             | 1.234  | 0.260 | 0.655  | 0.019 | 1.226  | 0.116 | 0.771  | 0.034 |
| 1371949_at   | BM390332  | basic leucine zipper and W2 domains 1                            | Bzw1             | 1.100  | 0.391 | 4.246  | 0.000 | 0.977  | 0.530 | 3.216  | 0.001 |
| 1370258_at   | BI303268  | basic leucine zipper and W2 domains 2                            | Bzw2             | 0.705  | 0.336 | 1.637  | 0.055 | 0.737  | 0.190 | 1.382  | 0.051 |
| 1377329_at   | BE113460  | Basic leucine zipper and W2 domains 2                            | Bzw2             | 1.007  | 0.991 | 1.004  | 0.936 | 1.009  | 0.995 | 0.999  | 0.983 |
| 1371384_at   | BG666659  | basic transcription factor 3                                     | Btf3             | 0.932  | 0.712 | 1.321  | 0.361 | 0.778  | 0.378 | 1.136  | 0.920 |
| 1381838_at   | AI548281  | Basic, immunoglobulin-like variable motif containing (predicted) | Bivm_predicted   | 0.949  | 0.318 | 0.792  | 0.057 | 0.519  | 0.318 | 0.941  | 0.883 |
| 1367643_at   | NM_012783 | basigin                                                          | Bsg              | 0.822  | 0.689 | 0.625  | 0.020 | 0.886  | 0.398 | 0.639  | 0.004 |
| 1372588_at   | AA944403  | basophilic leukemia expressed protein BLES03                     | Bles03           | 1.267  | 0.958 | 1.204  | 0.317 | 2.493  | 0.019 | 1.515  | 0.035 |
| 1372956_at   | BF420425  | Bat4 gene                                                        | Bat4             | 1.116  | 0.610 | 1.000  | 0.281 | 0.823  | 0.390 | 0.931  | 0.096 |
| 1387629_at   | NM_022261 | B-box and SPRY domain containing                                 | Bspry            | 1.217  | 0.547 | 0.965  | 0.590 | 1.036  | 0.278 | 0.966  | 0.526 |
| 1368118_at   | NM_031328 | B-cell CLL/lymphoma 10                                           | Bcl10            | 1.816  | 0.209 | 1.555  | 0.038 | 1.841  | 0.223 | 1.750  | 0.002 |
| 1391420_at   | AA964818  | B-cell CLL/lymphoma 11A (zinc finger protein)                    | Bcl11a           | 1.085  | 0.332 | 1.439  | 0.871 | 0.851  | 0.220 | 1.025  | 0.997 |
| 1383010_at   | AW531880  | B-cell CLL/lymphoma 11A (zinc finger protein)                    | Bcl11a           | 0.933  | 0.883 | 0.796  | 0.109 | 1.616  | 0.123 | 1.031  | 0.103 |
| 1392933_a_at | BF288704  | B-cell CLL/lymphoma 7A (predicted)                               | Bcl7a_predicted  | 1.099  | 0.265 | 1.079  | 0.562 | 0.434  | 0.116 | 1.141  | 0.343 |
| 1391855_at   | AW534002  | B-cell CLL/lymphoma 7A (predicted)                               | Bcl7a_predicted  | 0.991  | 0.904 | 1.476  | 0.012 | 0.812  | 0.042 | 1.274  | 0.136 |

|              |           |                                                                                        |                   |          |       |         |       |          |       |         |       |
|--------------|-----------|----------------------------------------------------------------------------------------|-------------------|----------|-------|---------|-------|----------|-------|---------|-------|
| 1384335_at   | BE111885  | B-cell CLL/lymphoma 9-like (predicted)                                                 | Bcl9l_predicted   | 1.148    | 0.064 | 0.882   | 0.295 | 1.982    | 0.050 | 1.128   | 0.035 |
| 1384944_at   | BE116855  | B-cell leukemia/lymphoma 11B (predicted)                                               | Bcl11b_predicted  | 1.013    | 0.180 | 1.415   | 0.557 | 1.250    | 0.580 | 1.768   | 0.576 |
| 1398482_at   | AI231774  | B-cell leukemia/lymphoma 3 (predicted)                                                 | Bcl3_predicted    | 26.384   | 0.009 | 15.921  | 0.002 | 51.593   | 0.007 | 15.391  | 0.006 |
| 1379368_at   | AI237606  | B-cell leukemia/lymphoma 6 (predicted)                                                 | Bcl6_predicted    | 1.902    | 0.105 | 9.635   | 0.000 | 2.234    | 0.098 | 10.862  | 0.000 |
| 1393641_at   | AA925583  | B-cell linker                                                                          | Blnc              | 23.767   | 0.001 | 12.632  | 0.000 | 11.652   | 0.002 | 3.029   | 0.011 |
| 1372709_at   | AI172204  | B-cell receptor-associated protein 29                                                  | Bcap29            | 0.863    | 0.182 | 3.463   | 0.008 | 0.953    | 0.079 | 2.983   | 0.000 |
| 1367503_at   | AI409930  | B-cell receptor-associated protein 31                                                  | Bcap31            | 0.620    | 0.664 | 0.816   | 0.131 | 0.784    | 0.108 | 0.881   | 0.174 |
| 1367657_at   | NM_017258 | B-cell translocation gene 1, anti-proliferative                                        | Btg1              | 1.414    | 0.019 | 1.475   | 0.001 | 1.649    | 0.012 | 1.734   | 0.002 |
| 1386995_at   | BI288701  | B-cell translocation gene 2, anti-proliferative                                        | Btg2              | 1.174    | 0.781 | 2.332   | 0.006 | 0.756    | 0.819 | 1.508   | 0.042 |
| 1386994_at   | NM_017259 | B-cell translocation gene 2, anti-proliferative                                        | Btg2              | 0.867    | 0.820 | 0.634   | 0.013 | 0.729    | 0.053 | 0.648   | 0.001 |
| 1368072_at   | NM_019290 | B-cell translocation gene 3                                                            | Btg3              | 0.642    | 0.074 | 1.100   | 0.136 | 0.532    | 0.015 | 0.919   | 0.845 |
| 1382993_at   | AI236152  | Bcl-2 binding component 3                                                              | Bbc3              | 2.398    | 0.008 | 2.960   | 0.004 | 2.681    | 0.014 | 1.967   | 0.107 |
| 1387805_at   | NM_053420 | BCL2/adenovirus E1B 19 kDa-interacting protein 3                                       | Bnip3             | 0.533    | 0.220 | 1.656   | 0.016 | 0.377    | 0.044 | 1.682   | 0.012 |
| 1386978_at   | NM_080888 | BCL2/adenovirus E1B 19 kDa-interacting protein 3-like                                  | Bnip3l            | 0.587    | 0.077 | 0.584   | 0.001 | 0.532    | 0.004 | 0.572   | 0.019 |
| 1367898_at   | AF441118  | BCL2/adenovirus E1B 19 kDa-interacting protein 3-like                                  | Bnip3l            | 0.938    | 0.421 | 0.809   | 0.031 | 0.666    | 0.003 | 0.718   | 0.033 |
| 1380092_at   | AI146096  | BCL2/adenovirus E1B 19kDa-interacting protein 1                                        | Bnip1             | 1.039    | 0.638 | 0.782   | 0.075 | 0.905    | 0.059 | 1.082   | 0.084 |
| 1367863_at   | NM_080897 | BCL2/adenovirus E1B 19kDa-interacting protein 1                                        | Bnip1             | 0.918    | 0.714 | 0.952   | 0.454 | 0.720    | 0.048 | 1.099   | 0.577 |
| 1377634_at   | AI715220  | BCL2/adenovirus E1B 19kDa-interacting protein 1, NIP2 (predicted)                      | Bnip2_predicted   | 2.452    | 0.010 | 1.400   | 0.004 | 1.528    | 0.092 | 1.365   | 0.042 |
| 1390133_at   | AI178277  | BCL2/adenovirus E1B 19kDa-interacting protein 1, NIP2 (predicted)                      | Bnip2_predicted   | 1.212    | 0.168 | 0.652   | 0.092 | 2.181    | 0.029 | 0.826   | 0.113 |
| 1368066_at   | NM_053812 | BCL2-antagonist/killer 1                                                               | Bak1              | 6.454    | 0.079 | 3.832   | 0.000 | 5.766    | 0.000 | 6.807   | 0.011 |
| 1375550_at   | BI280304  | Bcl2-associated athanogene 1 (predicted)                                               | Bag1_predicted    | 0.941    | 0.789 | 1.839   | 0.009 | 0.986    | 0.195 | 1.216   | 0.111 |
| 1390026_at   | AI231792  | Bcl2-associated athanogene 3                                                           | Bag3              | 0.943    | 0.705 | 2.654   | 0.099 | 0.697    | 0.525 | 1.546   | 0.251 |
| 1382376_at   | BI297220  | BCL2-associated athanogene 4                                                           | Bag4              | 1.122    | 0.466 | 1.072   | 0.898 | 0.979    | 0.923 | 1.481   | 0.034 |
| 1376261_at   | BI282898  | BCL2-associated athanogene 5                                                           | Bag5              | 1.034    | 0.052 | 1.500   | 0.021 | 0.482    | 0.009 | 1.165   | 0.036 |
| 1373868_at   | AI717547  | BCL2-associated transcription factor 1                                                 | Bclaf1            | 1.579    | 0.005 | 2.629   | 0.002 | 1.771    | 0.008 | 2.300   | 0.004 |
| 1391875_at   | AI176106  | BCL2-associated transcription factor 1                                                 | Bclaf1            | 1.415    | 0.217 | 2.747   | 0.083 | 1.178    | 0.090 | 1.978   | 0.023 |
| 1388752_at   | AI408078  | BCL2-associated transcription factor 1                                                 | Bclaf1            | 0.947    | 0.502 | 0.820   | 0.013 | 1.453    | 0.098 | 1.012   | 0.149 |
| 1369122_at   | AF235993  | Bcl2-associated X protein                                                              | Bax               | 1.165    | 0.077 | 2.337   | 0.000 | 1.238    | 0.200 | 2.317   | 0.002 |
| 1372279_at   | AA892271  | BCL2-like 13 (apoptosis facilitator) (predicted)                                       | Bcl2l13_predicted | 0.883    | 0.656 | 2.710   | 0.096 | 0.957    | 0.513 | 2.697   | 0.004 |
| 1380540_at   | AI547392  | BCL2-like 13 (apoptosis facilitator) (predicted)                                       | Bcl2l13_predicted | 1.364    | 0.735 | 2.326   | 0.686 | 1.016    | 0.625 | 1.069   | 0.852 |
| 1376115_at   | AA964244  | BCL2-like 13 (apoptosis facilitator) (predicted)                                       | Bcl2l13_predicted | 0.844    | 0.803 | 1.598   | 0.031 | 1.013    | 0.168 | 1.361   | 0.062 |
| 1393707_at   | AW527957  | Bcl2-like 2                                                                            | Bcl2l2            | 0.464    | 0.021 | 0.493   | 0.001 | 0.500    | 0.013 | 0.566   | 0.001 |
| 1385592_at   | BI289386  | Bcl6 interacting corepressor (predicted)                                               | Bcor_predicted    | 1.342    | 0.188 | 2.481   | 0.006 | 1.526    | 0.133 | 1.764   | 0.001 |
| 1374886_at   | BF402630  | BCS1-like (yeast)                                                                      | Bcs1l             | 0.318    | 0.000 | 1.284   | 0.094 | 0.497    | 0.078 | 0.957   | 0.402 |
| 1377570_at   | AI059563  | Beaded filament structural protein 1                                                   | Bfsp1             | 1.001    | 0.994 | 0.999   | 0.287 | 1.004    | 0.407 | 1.000   | 0.504 |
| 1367457_at   | NM_053739 | beclin 1 (coiled-coil, myosin-like BCL2-interacting protein)                           | Becn1             | 0.837    | 0.111 | 0.908   | 0.013 | 0.856    | 0.143 | 0.849   | 0.083 |
| 1371811_at   | BI278232  | Bernardinelli-Seip congenital lipodystrophy 2 homolog (human)                          | Bscl2             | 0.352    | 0.035 | 0.439   | 0.022 | 0.256    | 0.019 | 0.438   | 0.014 |
| 1370913_at   | AI409634  | Best5 protein                                                                          | Best5             | 1019.519 | 0.011 | 107.260 | 0.015 | 1285.111 | 0.010 | 150.754 | 0.011 |
| 1371633_at   | BI285669  | beta catenin-like 1                                                                    | Ctnnb1            | 0.632    | 0.061 | 0.640   | 0.001 | 0.758    | 0.109 | 0.598   | 0.012 |
| 1370907_at   | M83143    | beta galactoside alpha 2,6 sialyltransferase 1                                         | St6gal1           | 0.225    | 0.039 | 0.153   | 0.000 | 0.256    | 0.061 | 0.208   | 0.016 |
| 1385144_at   | AW524749  | Beta galactoside alpha 2,6 sialyltransferase 2                                         | St6gal2           | 1.423    | 0.051 | 0.561   | 0.052 | 1.297    | 0.244 | 0.338   | 0.023 |
| 1373014_at   | BE111966  | beta-1,3-glucuronyltransferase 3 (glucuronosyltransferase I) (predicted)               | B3gat3_predicted  | 0.455    | 0.033 | 0.795   | 0.050 | 0.495    | 0.039 | 0.709   | 0.028 |
| 1371440_at   | AW916647  | Beta-2 microglobulin                                                                   | B2m               | 7.040    | 0.000 | 6.195   | 0.001 | 9.634    | 0.000 | 9.111   | 0.002 |
| 1367595_s_at | NM_012512 | beta-2 microglobulin                                                                   | B2m               | 1.851    | 0.006 | 1.617   | 0.000 | 2.131    | 0.006 | 1.806   | 0.001 |
| 1373247_at   | AW435407  | Beta-site APP cleaving enzyme 1                                                        | Bace1             | 0.757    | 0.155 | 0.870   | 0.092 | 0.935    | 0.663 | 0.881   | 0.046 |
| 1377390_at   | BG381587  | beta-site APP-cleaving enzyme 2                                                        | Bace2             | 2.947    | 0.063 | 2.968   | 0.004 | 2.405    | 0.061 | 3.042   | 0.003 |
| 1374654_at   | BE109603  | beta-transducin repeat containing                                                      | Btrc              | 1.191    | 0.203 | 2.260   | 0.091 | 0.581    | 0.113 | 1.618   | 0.023 |
| 1392557_at   | BF389151  | Bicaudal C homolog 1 (Drosophila) (predicted)                                          | Bicc1_predicted   | 0.748    | 0.291 | 0.727   | 0.087 | 0.965    | 0.867 | 0.795   | 0.068 |
| 1383822_at   | AI029990  | bicaudal D homolog 2 (Drosophila)                                                      | Bicd2             | 1.434    | 0.165 | 2.111   | 0.007 | 0.735    | 0.102 | 1.440   | 0.034 |
| 1388733_at   | AI177631  | bifunctional apoptosis regulator                                                       | Bfar              | 1.689    | 0.004 | 1.213   | 0.031 | 1.547    | 0.001 | 1.210   | 0.004 |
| 1395377_at   | BE107113  | bifunctional apoptosis regulator                                                       | Bfar              | 1.550    | 0.064 | 1.231   | 0.667 | 1.936    | 0.023 | 0.999   | 0.996 |
| 1368164_at   | NM_053850 | biliverdin reductase A                                                                 | Blvra             | 0.560    | 0.021 | 0.802   | 0.901 | 0.705    | 0.096 | 1.001   | 0.906 |
| 1392539_at   | AI009013  | biliverdin reductase B (flavin reductase (NADPH)) (predicted)                          | Blvrb_predicted   | 1.215    | 0.946 | 0.770   | 0.768 | 0.702    | 0.068 | 0.776   | 0.398 |
| 1372137_at   | BI279854  | biogenesis of lysosome-related organelles complex-1, subunit 1 (predicted)             | Bloc1s1_predicted | 0.871    | 0.332 | 0.846   | 0.115 | 0.677    | 0.868 | 0.911   | 0.394 |
| 1398473_at   | BI290651  | biogenesis of lysosome-related organelles complex-1, subunit 2                         | Bloc1s2           | 0.958    | 0.990 | 1.484   | 0.020 | 0.976    | 0.842 | 1.208   | 0.010 |
| 1386773_at   | BF524794  | biotinidase                                                                            | Btd               | 0.754    | 0.127 | 0.304   | 0.011 | 0.791    | 0.131 | 0.251   | 0.005 |
| 1388617_at   | AW914746  | biphenyl hydrolase-like (serine hydrolase, breast epithelial mucin-associated antigen) | Bphl              | 0.392    | 0.007 | 0.367   | 0.001 | 0.387    | 0.001 | 0.315   | 0.000 |
| 1398317_at   | BF283428  | bisphosphate 3'-nucleotidase 1                                                         | Bpnt1             | 1.496    | 0.264 | 1.035   | 0.103 | 1.607    | 0.052 | 1.628   | 0.018 |
| 1372160_at   | BM389738  | bladder cancer associated protein homolog (human)                                      | Blcap             | 0.818    | 0.729 | 0.734   | 0.007 | 0.806    | 0.234 | 0.759   | 0.007 |
| 1371808_at   | AI012747  | bleomycin hydrolase                                                                    | Blmh              | 0.544    | 0.033 | 1.199   | 0.062 | 0.376    | 0.005 | 1.038   | 0.942 |
| 1392910_at   | AA859968  | block of proliferation 1                                                               | Bop1              | 0.971    | 0.995 | 1.936   | 0.003 | 0.621    | 0.002 | 1.882   | 0.002 |

|              |           |                                                                                                                       |                      |       |       |        |       |       |       |        |       |
|--------------|-----------|-----------------------------------------------------------------------------------------------------------------------|----------------------|-------|-------|--------|-------|-------|-------|--------|-------|
| 1372710_at   | AI175027  | blocked early in transport 1 homolog ( <i>S. cerevisiae</i> )                                                         | Bet1                 | 0.614 | 0.500 | 0.532  | 0.018 | 0.755 | 0.390 | 0.588  | 0.003 |
| 1368881_at   | NM_019251 | blocked early in transport 1 homolog ( <i>S. cerevisiae</i> )                                                         | Bet1                 | 0.689 | 0.914 | 2.059  | 0.158 | 0.609 | 0.158 | 1.277  | 0.212 |
| 1372950_at   | AI600006  | blocked early in transport 1 homolog ( <i>S. cerevisiae</i> ) like                                                    | Bet1l                | 0.686 | 0.065 | 0.686  | 0.061 | 0.714 | 0.037 | 0.828  | 0.422 |
| 1370823_at   | AF387513  | BMP and activin membrane-bound inhibitor, homolog ( <i>Xenopus laevis</i> )                                           | Bambi                | 0.567 | 0.137 | 0.740  | 0.150 | 0.288 | 0.010 | 0.916  | 0.486 |
| 1379174_at   | BE121123  | BMP/retinoic acid-inducible neural-specific protein 2                                                                 | Brinp2               | 1.095 | 0.779 | 0.884  | 0.982 | 1.015 | 0.997 | 0.999  | 0.993 |
| 1386774_at   | BF551863  | BMP/retinoic acid-inducible neural-specific protein 2                                                                 | Brinp2               | 0.997 | 0.949 | 0.610  | 0.092 | 0.996 | 0.995 | 1.006  | 0.089 |
| 1392397_at   | BF389365  | BMP-2 inducible kinase                                                                                                | Bmp2k                | 0.323 | 0.011 | 0.534  | 0.477 | 0.327 | 0.014 | 0.889  | 0.502 |
| 1373768_at   | AI406390  | BMS1-like, ribosome assembly protein (yeast)                                                                          | Bms1l                | 0.532 | 0.014 | 1.061  | 0.374 | 0.641 | 0.057 | 0.893  | 0.893 |
| 1383829_at   | BF392234  | bobby sox homolog ( <i>Drosophila</i> ) (predicted)                                                                   | Bbx_predicted        | 1.591 | 0.007 | 1.143  | 0.058 | 2.865 | 0.008 | 1.209  | 0.313 |
| 1385235_at   | AA818804  | bol, boule-like ( <i>Drosophila</i> ) (predicted)                                                                     | Boll_predicted       | 1.222 | 0.791 | 2.557  | 0.181 | 0.938 | 0.093 | 1.329  | 0.339 |
| 1372157_at   | AI232807  | bolA-like 1 ( <i>E. coli</i> ) (predicted)                                                                            | Bola1_predicted      | 0.722 | 0.084 | 0.938  | 0.260 | 0.790 | 0.075 | 0.765  | 0.270 |
| 1390738_at   | BM385476  | bone marrow stromal cell antigen 2                                                                                    | Bst2                 | 4.604 | 0.005 | 6.600  | 0.001 | 7.447 | 0.004 | 11.399 | 0.001 |
| 1371452_at   | BE110662  | bone marrow stromal cell-derived ubiquitin-like protein                                                               | Bmsc-UbP             | 0.851 | 0.952 | 0.991  | 0.863 | 0.859 | 0.470 | 1.174  | 0.875 |
| 1368945_at   | NM_017178 | bone morphogenetic protein 2                                                                                          | Bmp2                 | 1.081 | 0.931 | 1.836  | 0.030 | 1.581 | 0.015 | 2.273  | 0.005 |
| 1369773_at   | NM_017105 | bone morphogenetic protein 3                                                                                          | Bmp3                 | 1.008 | 0.994 | 0.699  | 0.058 | 0.861 | 0.278 | 0.959  | 0.042 |
| 1387232_at   | NM_012827 | bone morphogenetic protein 4                                                                                          | Bmp4                 | 1.001 | 0.996 | 1.043  | 0.115 | 1.001 | 0.899 | 1.044  | 0.357 |
| 1388920_at   | AI230985  | bone morphogenetic protein 6                                                                                          | Bmp6                 | 1.316 | 0.206 | 3.334  | 0.028 | 1.006 | 0.589 | 1.003  | 0.761 |
| 1368899_at   | NM_030849 | bone morphogenetic protein receptor, type 1A                                                                          | Bmpr1a               | 1.058 | 0.666 | 1.172  | 0.022 | 1.155 | 0.379 | 1.149  | 0.047 |
| 1376843_at   | BE118651  | bone morphogenic protein receptor, type II (serine/threonine kinase)                                                  | Bmpr2                | 0.548 | 0.393 | 0.972  | 0.597 | 0.961 | 0.863 | 1.184  | 0.284 |
| 1382728_at   | AA924018  | Bone morphogenic protein receptor, type II (serine/threonine kinase)                                                  | Bmpr2                | 0.969 | 0.716 | 0.869  | 0.405 | 1.128 | 0.824 | 1.010  | 0.892 |
| 1374313_at   | BI294383  | BPY2 interacting protein 1 (predicted)                                                                                | Bpy2ip1_predicted    | 1.188 | 0.930 | 1.068  | 0.345 | 1.004 | 0.969 | 1.066  | 0.978 |
| 1398350_at   | BG380454  | brain abundant, membrane attached signal protein 1                                                                    | Basp1                | 1.714 | 0.008 | 1.668  | 0.007 | 1.655 | 0.010 | 1.743  | 0.020 |
| 1369310_at   | NM_022300 | brain abundant, membrane attached signal protein 1                                                                    | Basp1                | 1.104 | 0.068 | 2.476  | 0.074 | 0.997 | 0.933 | 1.418  | 0.283 |
| 1398305_at   | U30831    | brain and kidney protein                                                                                              | Bk                   | 0.521 | 0.235 | 0.492  | 0.146 | 0.353 | 0.037 | 1.265  | 0.903 |
| 1370418_s_at | U30831    | brain and kidney protein /// hypothetical gene supported by NM_138849                                                 | Bk /// LOC497736     | 0.124 | 0.029 | 0.467  | 0.032 | 0.364 | 0.011 | 0.667  | 0.052 |
| 1390040_at   | AA851481  | brain and reproductive organ-expressed protein                                                                        | Bre                  | 0.878 | 0.165 | 0.695  | 0.022 | 0.997 | 0.946 | 0.547  | 0.013 |
| 1388723_at   | AI171289  | brain and reproductive organ-expressed protein                                                                        | Bre                  | 0.622 | 0.499 | 0.982  | 0.200 | 0.737 | 0.105 | 0.817  | 0.338 |
| 1388802_at   | AI579422  | brain expressed X-linked 1                                                                                            | Bex1                 | 0.735 | 0.585 | 0.946  | 0.407 | 0.421 | 0.001 | 0.762  | 0.125 |
| 1373458_at   | BI289546  | brain expressed X-linked 4                                                                                            | Bex4                 | 0.695 | 0.827 | 1.360  | 0.178 | 0.618 | 0.102 | 1.319  | 0.070 |
| 1388146_at   | AW523578  | Brain Ntab mRNA sequence                                                                                              | ---                  | 0.752 | 0.024 | 7.639  | 0.001 | 0.609 | 0.005 | 3.325  | 0.007 |
| 1376519_at   | BI280846  | brain protein 16                                                                                                      | Brp16                | 0.744 | 0.215 | 1.008  | 0.987 | 0.529 | 0.048 | 0.932  | 0.208 |
| 1386867_at   | NM_133561 | brain protein 44-like                                                                                                 | Brp44l               | 0.968 | 0.943 | 1.217  | 0.400 | 1.179 | 0.400 | 1.535  | 0.066 |
| 1371833_at   | AI230753  | brain protein I3                                                                                                      | Bri3                 | 1.134 | 0.967 | 2.040  | 0.010 | 0.859 | 0.488 | 1.532  | 0.035 |
| 1373380_at   | AI169085  | brain zinc finger protein                                                                                             | LOC362154            | 1.245 | 0.093 | 1.513  | 0.000 | 1.252 | 0.061 | 1.581  | 0.048 |
|              |           |                                                                                                                       | LOC362154 ///        |       |       |        |       |       |       |        |       |
| 1385921_at   | BF550329  | brain zinc finger protein /// similar to brain Zn-finger protein (predicted)                                          | RGD1562140_predicted | 1.008 | 0.952 | 1.309  | 0.038 | 1.028 | 0.714 | 1.347  | 0.181 |
| 1373081_at   | AI105000  | Brain-specific angiogenesis inhibitor 1-associated protein 2                                                          | Baiap2               | 0.780 | 0.027 | 0.739  | 0.200 | 0.716 | 0.017 | 0.781  | 0.718 |
| 1374117_at   | BI279562  | brain-specific angiogenesis inhibitor 1-associated protein 2                                                          | Baiap2               | 1.021 | 0.287 | 1.002  | 0.913 | 0.732 | 0.091 | 0.990  | 0.845 |
| 1370869_at   | AI102790  | branched chain aminotransferase 1, cytosolic                                                                          | Bcat1                | 2.439 | 0.190 | 18.575 | 0.000 | 2.166 | 0.386 | 7.129  | 0.002 |
| 1390726_at   | BF393120  | Branched chain aminotransferase 1, cytosolic                                                                          | Bcat1                | 0.972 | 0.514 | 0.819  | 0.061 | 1.047 | 0.350 | 0.569  | 0.080 |
| 1369520_a_at | NM_017253 | branched chain aminotransferase 1, cytosolic                                                                          | Bcat1                | 1.070 | 0.860 | 1.567  | 0.101 | 1.244 | 0.046 | 1.200  | 0.138 |
| 1370906_at   | BM385109  | branched chain keto acid dehydrogenase E1, beta polypeptide                                                           | Bckdhh               | 0.703 | 0.266 | 1.175  | 0.074 | 1.264 | 0.448 | 1.399  | 0.008 |
| 1370897_at   | J02827    | branched chain ketoacid dehydrogenase E1, alpha polypeptide                                                           | Bckdha               | 1.004 | 0.751 | 0.986  | 0.898 | 1.003 | 0.023 | 0.997  | 0.987 |
| 1370842_at   | BI277527  | branched chain ketoacid dehydrogenase kinase                                                                          | Bckdk                | 0.755 | 0.114 | 1.000  | 0.998 | 0.666 | 0.064 | 0.994  | 0.960 |
| 1374323_at   | BM389139  | BRCA2 and CDKN1A interacting protein (predicted)                                                                      | Bccip_predicted      | 0.782 | 0.161 | 0.838  | 0.230 | 0.704 | 0.006 | 0.899  | 0.241 |
| 1381141_at   | BF396613  | Breast cancer 2                                                                                                       | Brca2                | 1.180 | 0.994 | 1.204  | 0.463 | 1.186 | 0.472 | 1.090  | 0.999 |
| 1367752_at   | NM_012931 | breast cancer anti-estrogen resistance 1                                                                              | Bcar1                | 1.210 | 0.670 | 1.782  | 0.620 | 1.212 | 0.538 | 1.033  | 0.995 |
| 1373428_at   | AA851241  | breast cancer metastasis-suppressor 1                                                                                 | Brms1                | 1.062 | 0.644 | 0.900  | 0.828 | 0.960 | 0.807 | 0.941  | 0.154 |
| 1373098_at   | BF394321  | breast carcinoma amplified sequence 1                                                                                 | Bcas1                | 0.997 | 0.601 | 1.227  | 0.939 | 0.970 | 0.472 | 1.229  | 0.177 |
| 1371868_at   | AA851386  | breast carcinoma amplified sequence 2 (predicted)                                                                     | Bcas2_predicted      | 1.046 | 0.823 | 1.564  | 0.082 | 1.074 | 0.745 | 1.200  | 0.698 |
| 1379775_at   | AI556888  | BRF1 homolog, subunit of RNA polymerase III transcription initiation factor IIIB ( <i>S. cerevisiae</i> ) (predicted) | Brf1_predicted       | 0.702 | 0.079 | 1.251  | 0.189 | 0.778 | 0.333 | 0.934  | 0.384 |
| 1374891_at   | BF406141  | BRF2, subunit of RNA polymerase III transcription initiation factor, BRF1-like                                        | Brf2                 | 1.014 | 0.910 | 0.896  | 0.300 | 1.015 | 0.472 | 0.904  | 0.358 |
| 1379588_at   | AA874805  | Bridging integrator 1                                                                                                 | Bin1                 | 0.650 | 0.041 | 0.312  | 0.001 | 1.016 | 0.232 | 0.497  | 0.031 |
| 1367779_at   | NM_053959 | bridging integrator 1                                                                                                 | Bin1                 | 1.062 | 0.098 | 0.861  | 0.057 | 1.314 | 0.256 | 0.711  | 0.031 |
| 1396899_at   | BE119227  | Bridging integrator 1                                                                                                 | Bin1                 | 1.135 | 0.867 | 0.782  | 0.612 | 1.806 | 0.252 | 0.706  | 0.073 |
| 1399105_at   | AA926279  | bridging integrator 3                                                                                                 | Bin3                 | 0.705 | 0.637 | 2.090  | 0.013 | 0.968 | 0.928 | 1.684  | 0.151 |
| 1392514_at   | BE095565  | brix domain containing 1 (predicted)                                                                                  | Bxdc1_predicted      | 0.675 | 0.099 | 2.694  | 0.015 | 0.650 | 0.062 | 1.640  | 0.004 |
| 1389569_at   | AW917092  | brix domain containing 2                                                                                              | Bxdc2                | 0.844 | 0.081 | 2.449  | 0.006 | 0.765 | 0.007 | 1.696  | 0.006 |
| 1395479_at   | BG373428  | brix domain containing 2                                                                                              | Bxdc2                | 0.988 | 0.319 | 1.645  | 0.264 | 0.759 | 0.485 | 1.489  | 0.286 |
| 1396420_at   | BF395914  | Bromodomain adjacent to zinc finger domain protein 1B                                                                 | Baz1b                | 1.194 | 0.583 | 0.907  | 0.811 | 1.321 | 0.209 | 1.038  | 0.678 |
| 1385853_at   | BF560180  | bromodomain adjacent to zinc finger domain, 1A (predicted)                                                            | Baz1a_predicted      | 1.651 | 0.099 | 2.226  | 0.007 | 0.962 | 0.622 | 1.024  | 0.112 |



|              |           |                                                                 |                    |        |       |       |       |       |       |       |       |
|--------------|-----------|-----------------------------------------------------------------|--------------------|--------|-------|-------|-------|-------|-------|-------|-------|
| 1377727_at   | BE109134  | bromodomain adjacent to zinc finger domain, 1A (predicted)      | Baz1a_predicted    | 1.421  | 0.178 | 2.347 | 0.044 | 2.049 | 0.051 | 1.854 | 0.029 |
| 1376533_at   | BF398368  | bromodomain adjacent to zinc finger domain, 2B (predicted)      | Baz2b_predicted    | 0.559  | 0.004 | 0.852 | 0.502 | 0.823 | 0.185 | 0.912 | 0.342 |
| 1392421_at   | AW526570  | bromodomain adjacent to zinc finger domain, 2B (predicted)      | Baz2b_predicted    | 0.975  | 0.389 | 1.173 | 0.774 | 1.000 | 0.204 | 0.834 | 0.470 |
| 1397486_x_at | BF404567  | Bromodomain adjacent to zinc finger domain, 2B (predicted)      | Baz2b_predicted    | 1.049  | 0.767 | 1.113 | 0.701 | 1.050 | 0.335 | 0.946 | 0.465 |
| 1373430_at   | BG378867  | bromodomain adjacent to zinc finger domain, 2B (predicted)      | Baz2b_predicted    | 1.063  | 0.962 | 0.579 | 0.009 | 1.211 | 0.607 | 0.778 | 0.039 |
| 1380499_at   | AI029043  | Bromodomain and WD repeat domain containing 1 (predicted)       | Brwd1_predicted    | 0.712  | 0.409 | 1.596 | 0.070 | 1.007 | 0.909 | 1.200 | 0.304 |
| 1398654_at   | AI501129  | Bromodomain and WD repeat domain containing 1 (predicted)       | Brwd1_predicted    | 1.196  | 0.599 | 1.435 | 0.046 | 0.856 | 0.850 | 1.042 | 0.753 |
| 1384024_at   | BI301225  | bromodomain containing 1 (predicted)                            | Brd1_predicted     | 1.286  | 0.036 | 1.044 | 0.038 | 1.264 | 0.040 | 1.162 | 0.068 |
| 1380145_at   | AW529414  | Bromodomain containing 1 (predicted)                            | Brd1_predicted     | 0.921  | 0.862 | 1.056 | 0.914 | 1.046 | 0.467 | 0.767 | 0.046 |
| 1371719_at   | AA946361  | bromodomain containing 2                                        | Brd2               | 1.192  | 0.597 | 1.488 | 0.242 | 0.990 | 0.790 | 1.260 | 0.054 |
| 1389029_at   | BE108923  | Bromodomain containing 3 (predicted)                            | Brd3_predicted     | 0.721  | 0.059 | 0.420 | 0.003 | 0.707 | 0.075 | 0.501 | 0.002 |
| 1372351_at   | AI229448  | bromodomain containing 4                                        | Brd4               | 1.671  | 0.004 | 1.531 | 0.014 | 1.558 | 0.032 | 1.548 | 0.003 |
| 1375650_at   | BM389207  | bromodomain containing 4                                        | Brd4               | 1.288  | 0.047 | 2.319 | 0.012 | 1.447 | 0.014 | 2.770 | 0.057 |
| 1395648_at   | BF389377  | Bromodomain containing 4                                        | Brd4               | 1.374  | 0.062 | 0.885 | 0.554 | 1.799 | 0.278 | 0.830 | 0.315 |
| 1393567_at   | BF389164  | bromodomain containing 4                                        | Brd4               | 1.000  | 0.632 | 1.186 | 0.200 | 1.004 | 0.933 | 1.004 | 0.993 |
| 1399055_at   | BI275924  | bromodomain containing 7 (predicted)                            | Brd7_predicted     | 0.622  | 0.419 | 0.972 | 0.147 | 0.859 | 0.220 | 1.019 | 0.839 |
| 1372207_at   | AI549477  | bromodomain containing 8                                        | Brd8               | 1.534  | 0.124 | 0.824 | 0.224 | 1.407 | 0.952 | 1.131 | 0.162 |
| 1377777_at   | BM391018  | bromodomain containing 9 (predicted)                            | Brd9_predicted     | 1.250  | 0.150 | 0.691 | 0.100 | 1.259 | 0.121 | 0.879 | 0.418 |
| 1381995_at   | AW530502  | bruno-like 4, RNA binding protein (Drosophila) (predicted)      | Brunol4_predicted  | 3.145  | 0.044 | 0.972 | 0.711 | 4.522 | 0.040 | 1.066 | 0.676 |
| 1372720_at   | AA848449  | BTB (POZ) domain containing 1                                   | Btbd1              | 0.494  | 0.087 | 0.215 | 0.000 | 0.637 | 0.074 | 0.356 | 0.016 |
| 1376333_at   | BI275800  | BTB (POZ) domain containing 1                                   | Btbd1              | 0.201  | 0.118 | 0.331 | 0.017 | 0.612 | 0.006 | 0.694 | 0.077 |
| 1376274_at   | AI233751  | BTB (POZ) domain containing 10                                  | Btbd10             | 1.014  | 0.981 | 1.388 | 0.016 | 0.528 | 0.074 | 1.118 | 0.503 |
| 1380459_at   | AI555023  | BTB (POZ) domain containing 14A                                 | Btbd14a            | 1.373  | 0.273 | 1.059 | 0.424 | 1.362 | 0.058 | 1.101 | 0.292 |
| 1379439_at   | AA850609  | BTB (POZ) domain containing 15                                  | Btbd15             | 1.313  | 0.104 | 1.657 | 0.000 | 1.149 | 0.499 | 1.365 | 0.070 |
| 1382478_at   | AI230481  | BTB (POZ) domain containing 3 (predicted)                       | Btbd3_predicted    | 0.997  | 0.426 | 0.794 | 0.187 | 1.005 | 0.982 | 0.738 | 0.255 |
| 1383083_at   | AI575458  | Btg3 associated nuclear protein (predicted)                     | Banp_predicted     | 1.958  | 0.010 | 1.463 | 0.061 | 2.890 | 0.127 | 1.387 | 0.986 |
| 1372052_at   | BI275918  | Budding uninhibited by benzimidazoles 3 homolog (S. cerevisiae) | Bub3               | 0.773  | 0.450 | 1.098 | 0.064 | 0.619 | 0.066 | 1.149 | 0.235 |
| 1392959_at   | AA925983  | Bwk1 leukemia-related gene                                      | Bwk1               | 1.440  | 0.033 | 1.036 | 0.576 | 1.335 | 0.069 | 1.454 | 0.008 |
| 1377638_at   | AI549060  | Bwk1 leukemia-related gene                                      | Bwk1               | 1.733  | 0.342 | 0.899 | 0.467 | 0.636 | 0.487 | 1.102 | 0.661 |
| 1385184_at   | AI145766  | Bwk1 leukemia-related gene                                      | Bwk1               | 0.994  | 0.950 | 0.875 | 0.395 | 1.001 | 0.351 | 0.986 | 0.018 |
| 1389200_at   | AA851296  | bystin-like                                                     | Bysl               | 0.556  | 0.248 | 1.547 | 0.055 | 0.406 | 0.005 | 1.066 | 0.451 |
| 1388680_at   | BM385686  | C1GALT1-specific chaperone 1                                    | C1galt1c1          | 0.652  | 0.277 | 0.279 | 0.005 | 0.575 | 0.084 | 0.378 | 0.006 |
| 1390754_at   | BF412921  | Ca2+-dependent secretion activator                              | Cadps              | 3.347  | 0.002 | 0.826 | 0.005 | 5.073 | 0.010 | 0.971 | 0.542 |
| 1368523_at   | NM_013219 | Ca2+-dependent secretion activator                              | Cadps              | 1.282  | 0.024 | 0.425 | 0.002 | 1.172 | 0.136 | 0.646 | 0.183 |
| 1379663_at   | AI010254  | Cache domain containing 1 (predicted)                           | Cachd1_predicted   | 2.500  | 0.011 | 1.019 | 0.193 | 1.354 | 0.181 | 1.152 | 0.341 |
| 1386947_at   | NM_031334 | cadherin 1                                                      | Cdh1               | 2.907  | 0.002 | 1.948 | 0.004 | 2.516 | 0.014 | 1.886 | 0.001 |
| 1393066_at   | AI070787  | Cadherin 1                                                      | Cdh1               | 0.277  | 0.002 | 0.206 | 0.006 | 0.322 | 0.075 | 0.186 | 0.023 |
| 1392140_at   | BF419584  | Cadherin 11                                                     | Cdh11              | 1.704  | 0.582 | 0.925 | 0.995 | 1.710 | 0.161 | 0.943 | 0.938 |
| 1388936_at   | BI296340  | cadherin 11                                                     | Cdh11              | 1.009  | 0.958 | 0.638 | 0.098 | 0.759 | 0.232 | 0.550 | 0.022 |
| 1383985_at   | AW523000  | cadherin 15                                                     | Cdh15              | 1.009  | 0.916 | 1.036 | 0.406 | 1.742 | 0.052 | 0.998 | 0.934 |
| 1368642_at   | NM_031333 | cadherin 2 /// hypothetical gene supported by NM_031333         | Cdh2 /// LOC497718 | 1.295  | 0.368 | 0.409 | 0.002 | 0.925 | 0.666 | 0.527 | 0.028 |
| 1387259_at   | AF097593  | cadherin 2 /// hypothetical gene supported by NM_031333         | Cdh2 /// LOC497718 | 0.755  | 0.394 | 0.879 | 0.853 | 0.912 | 0.645 | 1.018 | 0.828 |
| 1388045_a_at | D83348    | cadherin 22                                                     | Cdh22              | 1.174  | 0.041 | 0.422 | 0.012 | 1.946 | 0.023 | 0.894 | 0.581 |
| 1378065_at   | BI274450  | Cadherin 22                                                     | Cdh22              | 1.362  | 0.229 | 0.606 | 0.065 | 1.480 | 0.529 | 0.301 | 0.019 |
| 1382089_at   | AI070489  | Cadherin 22                                                     | Cdh22              | 0.825  | 0.443 | 0.863 | 0.507 | 1.492 | 0.965 | 0.413 | 0.079 |
| 1395335_at   | BF544005  | Cadherin 22                                                     | Cdh22              | 0.904  | 0.521 | 0.566 | 0.018 | 0.907 | 0.597 | 0.553 | 0.083 |
| 1368887_at   | NM_019161 | cadherin 22                                                     | Cdh22              | 0.912  | 0.591 | 0.653 | 0.174 | 1.004 | 0.968 | 0.733 | 0.172 |
| 1392706_at   | AI548870  | Cadherin 23 (otocadherin)                                       | Cdh23              | 0.971  | 0.527 | 0.973 | 0.856 | 0.777 | 0.198 | 0.848 | 0.691 |
| 1397177_at   | BF409052  | Cadherin 7, type 2                                              | Cdh7               | 0.989  | 0.391 | 0.995 | 0.181 | 0.858 | 0.238 | 1.010 | 0.773 |
| 1375619_at   | BF417982  | Cadherin 8                                                      | Cdh8               | 1.440  | 0.486 | 0.923 | 0.980 | 1.783 | 0.476 | 1.200 | 0.754 |
| 1374910_at   | BE103601  | cadherin EGF LAG seven-pass G-type receptor 2                   | Celsr2             | 0.853  | 0.788 | 0.169 | 0.004 | 0.397 | 0.097 | 0.192 | 0.022 |
| 1368472_at   | NM_031320 | cadherin EGF LAG seven-pass G-type receptor 3                   | Celsr3             | 1.104  | 0.371 | 1.381 | 0.019 | 1.061 | 0.518 | 1.375 | 0.013 |
| 1370201_at   | X04280    | calbindin 1                                                     | Calb1              | 1.009  | 0.278 | 1.040 | 0.440 | 1.067 | 0.870 | 1.436 | 0.591 |
| 1370368_at   | AF061947  | calcineurin binding protein 1                                   | Cabin1             | 1.236  | 0.046 | 0.749 | 0.578 | 1.653 | 0.243 | 0.893 | 0.874 |
| 1369994_at   | NM_053670 | calcitonin gene-related peptide-receptor component protein      | Crcp               | 0.959  | 0.678 | 1.833 | 0.160 | 0.886 | 0.580 | 1.383 | 0.173 |
| 1370562_at   | M11596    | calcitonin-related polypeptide, beta                            | Calcb              | 13.021 | 0.002 | 5.403 | 0.001 | 7.958 | 0.012 | 6.969 | 0.000 |
| 1396446_at   | BF522502  | calcium activated nucleotidase 1                                | Cant1              | 0.487  | 0.505 | 0.622 | 0.847 | 0.332 | 0.091 | 0.663 | 0.126 |
| 1389588_at   | H35646    | calcium activated nucleotidase 1                                | Cant1              | 0.674  | 0.507 | 0.945 | 0.054 | 0.710 | 0.025 | 1.063 | 0.509 |
| 1367675_at   | NM_031145 | calcium and integrin binding 1 (calmyrin)                       | Cibi1              | 1.466  | 0.228 | 3.105 | 0.004 | 1.292 | 0.885 | 1.615 | 0.037 |
| 1370285_at   | AY078385  | calcium binding and coiled coil domain 1                        | Calcoco1           | 0.575  | 0.211 | 0.679 | 0.049 | 1.013 | 0.616 | 0.758 | 0.184 |
| 1376715_at   | AA901065  | calcium binding atopy-related autoantigen 1                     | Cbara1             | 0.665  | 0.503 | 1.168 | 0.105 | 0.728 | 0.156 | 1.218 | 0.111 |

|              |           |                                                                                                                                           |                                                             |       |       |       |       |       |       |       |       |
|--------------|-----------|-------------------------------------------------------------------------------------------------------------------------------------------|-------------------------------------------------------------|-------|-------|-------|-------|-------|-------|-------|-------|
| 1396749_at   | BF390144  | calcium binding protein 1                                                                                                                 | Cabp1                                                       | 0.220 | 0.016 | 4.581 | 0.019 | 0.548 | 0.270 | 3.641 | 0.033 |
| 1372243_at   | BE112280  | calcium binding protein 39 (predicted)                                                                                                    | Cab39_predicted                                             | 0.995 | 0.402 | 1.687 | 0.031 | 0.800 | 0.102 | 1.540 | 0.364 |
| 1372244_at   | BI285336  | calcium binding protein 39 (predicted)                                                                                                    | Cab39_predicted                                             | 0.844 | 0.599 | 1.028 | 0.873 | 0.602 | 0.132 | 0.912 | 0.295 |
| 1377391_at   | BF390552  | Calcium binding protein 39-like                                                                                                           | Cab39l                                                      | 1.022 | 0.379 | 1.025 | 0.951 | 1.013 | 0.868 | 0.954 | 0.728 |
| 1383341_at   | BG662592  | calcium binding protein 39-like                                                                                                           | Cab39l                                                      | 0.885 | 0.996 | 5.092 | 0.015 | 1.194 | 0.497 | 4.327 | 0.032 |
| 1371469_at   | BM958511  | calcium binding protein p22                                                                                                               | Chp                                                         | 0.829 | 0.999 | 0.713 | 0.033 | 0.853 | 0.961 | 0.704 | 0.042 |
| 1387388_at   | AB070350  | calcium binding protein p22 /// similar to calcium binding protein P22 (predicted) /// similar to calcium binding protein P22 (predicted) | Chp ///<br>RGD1565588_predicted ///<br>RGD1564956_predicted | 1.030 | 0.898 | 0.913 | 0.724 | 1.000 | 0.975 | 0.886 | 0.774 |
| 1397151_at   | BE108017  | Calcium channel, voltage-dependent, alpha 2/delta 3 subunit                                                                               | Cacna2d3                                                    | 0.899 | 0.653 | 1.480 | 0.854 | 0.900 | 0.476 | 1.115 | 0.883 |
| 1397823_at   | BE117531  | Calcium channel, voltage-dependent, alpha2/delta subunit 1                                                                                | Cacna2d1                                                    | 1.990 | 0.040 | 1.365 | 0.134 | 1.296 | 0.542 | 1.213 | 0.222 |
| 1369649_at   | AF400662  | calcium channel, voltage-dependent, alpha2/delta subunit 1                                                                                | Cacna2d1                                                    | 0.835 | 0.625 | 0.476 | 0.066 | 0.860 | 0.657 | 0.669 | 0.221 |
| 1395263_at   | AW529355  | Calcium channel, voltage-dependent, beta 2 subunit                                                                                        | Cacnb2                                                      | 1.256 | 0.056 | 0.779 | 0.093 | 1.144 | 0.903 | 0.783 | 0.283 |
| 1370178_at   | BG373973  | calcium channel, voltage-dependent, beta 2 subunit                                                                                        | Cacnb2                                                      | 0.742 | 0.123 | 1.138 | 0.158 | 0.701 | 0.004 | 1.098 | 0.131 |
| 1374717_at   | BI295624  | Calcium channel, voltage-dependent, beta 2 subunit                                                                                        | Cacnb2                                                      | 0.951 | 0.973 | 0.827 | 0.183 | 0.963 | 0.947 | 0.950 | 0.094 |
| 1387042_at   | NM_012828 | calcium channel, voltage-dependent, beta 3 subunit                                                                                        | Cacnb3                                                      | 1.031 | 0.192 | 0.947 | 0.394 | 1.434 | 0.205 | 1.605 | 0.004 |
| 1368759_at   | NM_053351 | calcium channel, voltage-dependent, gamma subunit 2                                                                                       | Cacng2                                                      | 0.999 | 0.995 | 0.999 | 0.150 | 1.001 | 0.331 | 1.001 | 0.764 |
| 1378151_at   | BE114019  | Calcium channel, voltage-dependent, gamma subunit 8                                                                                       | Cacng8                                                      | 1.284 | 0.597 | 0.950 | 0.625 | 0.711 | 0.216 | 1.199 | 0.095 |
| 1370452_at   | M59786    | calcium channel, voltage-dependent, L type, alpha 1C subunit                                                                              | Cacna1c                                                     | 0.885 | 0.955 | 0.732 | 0.079 | 0.676 | 0.116 | 0.673 | 0.050 |
| 1369086_a_at | NM_017298 | calcium channel, voltage-dependent, L type, alpha 1D subunit                                                                              | Cacna1d                                                     | 0.844 | 0.697 | 0.951 | 0.727 | 1.149 | 0.345 | 0.748 | 0.191 |
| 1397008_at   | BF404563  | Calcium channel, voltage-dependent, P/Q type, alpha 1A subunit                                                                            | Cacna1a                                                     | 0.914 | 0.151 | 0.718 | 0.348 | 0.764 | 0.203 | 0.725 | 0.519 |
| 1368398_at   | NM_031601 | calcium channel, voltage-dependent, T type, alpha 1H subunit                                                                              | Cacna1h                                                     | 2.640 | 0.178 | 0.807 | 0.631 | 2.408 | 0.069 | 0.634 | 0.013 |
| 1372705_at   | BG376747  | calcium homeostasis endoplasmic reticulum protein (predicted)                                                                             | Cherp_predicted                                             | 0.792 | 0.098 | 1.371 | 0.330 | 0.779 | 0.031 | 0.943 | 0.870 |
| 1387086_at   | NM_053334 | calcium modulating ligand                                                                                                                 | Camlg                                                       | 0.100 | 0.027 | 0.197 | 0.000 | 0.168 | 0.002 | 0.186 | 0.004 |
| 1388659_at   | BI295783  | calcium regulated heat stable protein 1                                                                                                   | Carhsp1                                                     | 2.108 | 0.013 | 2.479 | 0.003 | 2.410 | 0.006 | 2.617 | 0.007 |
| 1371536_at   | AI233208  | calcium regulated heat stable protein 1                                                                                                   | Carhsp1                                                     | 2.054 | 0.125 | 2.313 | 0.033 | 1.374 | 0.613 | 1.894 | 0.024 |
| 1367889_at   | NM_134468 | calcium/calmodulin-dependent protein kinase I                                                                                             | Camk1                                                       | 0.451 | 0.007 | 0.736 | 0.017 | 0.420 | 0.010 | 0.706 | 0.232 |
| 1391229_at   | BG381458  | calcium/calmodulin-dependent protein kinase I gamma                                                                                       | Camk1g                                                      | 0.383 | 0.008 | 0.368 | 0.003 | 0.660 | 0.130 | 0.401 | 0.004 |
| 1389876_at   | BE111167  | Calcium/calmodulin-dependent protein kinase II inhibitor 1                                                                                | Camk2n1                                                     | 0.961 | 0.789 | 0.639 | 0.040 | 0.790 | 0.130 | 0.489 | 0.043 |
| 1389824_at   | BF404381  | Calcium/calmodulin-dependent protein kinase II, alpha                                                                                     | Camk2a                                                      | 1.032 | 0.996 | 1.089 | 0.433 | 1.002 | 0.989 | 1.088 | 0.216 |
| 1398251_a_at | NM_021739 | calcium/calmodulin-dependent protein kinase II, beta                                                                                      | Camk2b                                                      | 1.003 | 0.967 | 0.738 | 0.294 | 0.998 | 0.834 | 0.684 | 0.237 |
| 1368834_at   | AA894330  | calcium/calmodulin-dependent protein kinase II, delta                                                                                     | Camk2d                                                      | 2.111 | 0.003 | 2.451 | 0.000 | 2.179 | 0.004 | 2.063 | 0.003 |
| 1391142_at   | BF400657  | Calcium/calmodulin-dependent protein kinase IV                                                                                            | Camk4                                                       | 1.000 | 0.621 | 0.990 | 0.929 | 0.922 | 0.431 | 1.150 | 0.332 |
| 1368156_at   | NM_031662 | calcium/calmodulin-dependent protein kinase kinase 1, alpha                                                                               | Camkk1                                                      | 0.754 | 0.029 | 0.852 | 0.177 | 0.953 | 0.646 | 1.013 | 0.276 |
| 1368955_at   | NM_022184 | calcium/calmodulin-dependent serine protein kinase (MAGUK family)                                                                         | Cask                                                        | 1.087 | 0.674 | 0.729 | 0.238 | 1.306 | 0.296 | 0.941 | 0.692 |
| 1369158_at   | NM_016996 | calcium-sensing receptor                                                                                                                  | Casr                                                        | 0.983 | 0.029 | 0.547 | 0.026 | 0.617 | 0.043 | 0.697 | 0.025 |
| 1392912_at   | BG664561  | calcyclin binding protein                                                                                                                 | Cacybp                                                      | 0.906 | 0.326 | 2.212 | 0.000 | 0.847 | 0.204 | 1.641 | 0.001 |
| 1392979_at   | AW918443  | calcyclin binding protein                                                                                                                 | Cacybp                                                      | 0.845 | 0.901 | 2.098 | 0.031 | 0.756 | 0.408 | 1.289 | 0.340 |
| 1387772_at   | NM_031969 | calmodulin 1                                                                                                                              | Calm1                                                       | 0.991 | 0.349 | 0.529 | 0.000 | 1.077 | 0.062 | 0.637 | 0.000 |
| 1369936_at   | X13933    | calmodulin 1                                                                                                                              | Calm1                                                       | 0.878 | 0.752 | 0.484 | 0.001 | 0.946 | 0.990 | 0.676 | 0.011 |
| 1369937_at   | BI279113  | calmodulin 1                                                                                                                              | Calm1                                                       | 0.944 | 0.825 | 0.720 | 0.136 | 0.901 | 0.169 | 0.755 | 0.282 |
| 1370246_at   | AA943837  | calmodulin 2                                                                                                                              | Calm2                                                       | 0.707 | 0.579 | 0.965 | 0.361 | 0.634 | 0.174 | 0.752 | 0.031 |
| 1370873_at   | AI411316  | calmodulin 3                                                                                                                              | Calm3                                                       | 0.770 | 0.181 | 0.322 | 0.014 | 0.676 | 0.127 | 0.250 | 0.003 |
| 1368101_at   | NM_012518 | calmodulin 3                                                                                                                              | Calm3                                                       | 0.551 | 0.314 | 1.056 | 0.881 | 0.434 | 0.007 | 0.871 | 0.737 |
| 1373317_at   | BI278721  | calmodulin 4 (predicted)                                                                                                                  | Calm4_predicted                                             | 1.068 | 0.526 | 1.000 | 0.854 | 1.001 | 0.913 | 1.001 | 0.859 |
| 1371687_at   | BI297860  | calnexin                                                                                                                                  | Canx                                                        | 0.774 | 0.074 | 1.565 | 0.707 | 0.833 | 0.232 | 1.279 | 0.461 |
| 1371686_at   | AA946205  | calnexin                                                                                                                                  | Canx                                                        | 0.740 | 0.191 | 0.914 | 0.101 | 0.945 | 0.507 | 0.997 | 0.933 |
| 1388442_at   | AA848326  | calnexin                                                                                                                                  | Canx                                                        | 0.768 | 0.979 | 1.222 | 0.922 | 0.982 | 0.499 | 1.134 | 0.579 |
| 1387009_at   | NM_019152 | calpain 1                                                                                                                                 | Capn1                                                       | 0.461 | 0.015 | 0.314 | 0.068 | 0.420 | 0.019 | 0.694 | 0.731 |
| 1368904_at   | NM_031673 | calpain 10                                                                                                                                | Capn10                                                      | 0.644 | 0.104 | 0.807 | 0.878 | 0.490 | 0.085 | 0.741 | 0.863 |
| 1376287_at   | BM389585  | calpain 13                                                                                                                                | Capn13                                                      | 1.709 | 0.984 | 1.297 | 0.817 | 1.185 | 0.992 | 0.892 | 0.505 |
| 1387860_at   | BF281377  | calpain 2                                                                                                                                 | Capn2                                                       | 1.523 | 0.105 | 1.378 | 0.018 | 1.429 | 0.100 | 1.085 | 0.480 |
| 1373111_at   | AI169441  | calpain 7                                                                                                                                 | Capn7                                                       | 0.763 | 0.059 | 1.356 | 0.007 | 0.672 | 0.034 | 1.281 | 0.030 |
| 1392341_at   | AW523444  | Calpain, small subunit 1                                                                                                                  | Capns1                                                      | 1.356 | 0.286 | 1.160 | 0.251 | 1.670 | 0.151 | 1.046 | 0.237 |
| 1367462_at   | U10861    | calpain, small subunit 1                                                                                                                  | Capns1                                                      | 1.026 | 0.962 | 1.047 | 0.885 | 1.086 | 0.408 | 1.113 | 0.575 |
| 1373466_at   | AA946474  | calpastatin                                                                                                                               | Cast                                                        | 0.483 | 0.017 | 0.334 | 0.004 | 0.463 | 0.009 | 0.344 | 0.026 |
| 1371173_a_at | Y13591    | calpastatin                                                                                                                               | Cast                                                        | 0.714 | 0.241 | 0.579 | 0.337 | 1.109 | 0.995 | 0.288 | 0.008 |
| 1369754_a_at | NM_053295 | calpastatin                                                                                                                               | Cast                                                        | 0.880 | 0.576 | 0.743 | 0.928 | 0.929 | 0.716 | 0.665 | 0.731 |
| 1391481_at   | BE104424  | Calpastatin                                                                                                                               | Cast                                                        | 0.894 | 0.776 | 1.162 | 0.077 | 1.046 | 0.151 | 0.932 | 0.097 |
| 1387856_at   | BI274457  | calponin 3, acidic                                                                                                                        | Cnn3                                                        | 1.008 | 0.259 | 1.643 | 0.000 | 1.666 | 0.040 | 1.976 | 0.002 |
| 1398750_at   | NM_022399 | calreticulin                                                                                                                              | Calr                                                        | 0.879 | 0.800 | 0.881 | 0.290 | 1.106 | 0.453 | 0.824 | 0.469 |

|              |           |                                                                      |                    |       |       |       |       |       |       |       |       |
|--------------|-----------|----------------------------------------------------------------------|--------------------|-------|-------|-------|-------|-------|-------|-------|-------|
| 1376732_at   | BM388733  | calreticulin 3                                                       | Calr3              | 1.131 | 0.326 | 0.789 | 0.580 | 1.129 | 0.326 | 0.996 | 0.992 |
| 1376225_at   | BF411924  | Calsenilin, presenilin binding protein, EF hand transcription factor | Csen               | 0.673 | 0.146 | 0.259 | 0.003 | 0.561 | 0.137 | 0.329 | 0.009 |
| 1388217_a_at | AJ001929  | calumenin /// calumenin                                              | Calu /// MGC124555 | 0.875 | 0.462 | 1.690 | 0.032 | 0.818 | 0.703 | 1.413 | 0.064 |
| 1368208_at   | NM_133558 | camello-like 1                                                       | Cml1               | 0.439 | 0.010 | 0.197 | 0.026 | 0.650 | 0.142 | 0.300 | 0.026 |
| 1369708_a_at | NM_031017 | cAMP responsive element binding protein 1                            | Creb1              | 1.452 | 0.579 | 1.290 | 0.546 | 1.159 | 0.230 | 1.434 | 0.041 |
| 1372990_at   | AI179264  | cAMP responsive element binding protein 3                            | Creb3              | 0.819 | 0.581 | 1.050 | 0.419 | 0.843 | 0.497 | 0.972 | 0.248 |
| 1374575_at   | BI304123  | cAMP responsive element binding protein 3-like 1                     | Creb3l1            | 3.486 | 0.035 | 2.428 | 0.004 | 1.733 | 0.019 | 1.162 | 0.067 |
| 1379565_at   | AA956791  | cAMP responsive element binding protein 3-like 2                     | Creb3l2            | 0.716 | 0.115 | 1.907 | 0.078 | 0.586 | 0.114 | 1.544 | 0.047 |
| 1373429_at   | BI295832  | cAMP responsive element binding protein-like 1                       | Crebl1             | 0.795 | 0.030 | 0.968 | 0.229 | 0.927 | 0.134 | 1.000 | 0.998 |
| 1373618_at   | BE113210  | cAMP responsive element binding protein-like 2                       | Crebl2             | 0.744 | 0.678 | 0.595 | 0.021 | 0.689 | 0.322 | 0.747 | 0.017 |
| 1393550_at   | BF564195  | CAMP responsive element modulator                                    | Crem               | 0.235 | 0.000 | 0.728 | 0.187 | 0.273 | 0.012 | 0.829 | 0.407 |
| 1369737_at   | NM_017334 | cAMP responsive element modulator                                    | Crem               | 0.445 | 0.150 | 0.740 | 0.010 | 0.646 | 0.009 | 0.684 | 0.006 |
| 1369738_s_at | NM_017334 | cAMP responsive element modulator                                    | Crem               | 0.384 | 0.428 | 0.723 | 0.029 | 0.496 | 0.062 | 0.428 | 0.011 |
| 1387714_at   | AB031423  | cAMP responsive element modulator                                    | Crem               | 0.871 | 0.946 | 0.813 | 0.354 | 0.932 | 0.408 | 0.903 | 0.711 |
| 1393008_at   | BI290317  | CAMP-regulated phosphoprotein 19                                     | Arpp19             | 0.841 | 0.429 | 1.155 | 0.888 | 0.403 | 0.057 | 0.694 | 0.130 |
| 1387077_at   | NM_031660 | cAMP-regulated phosphoprotein 19                                     | Arpp19             | 1.141 | 0.816 | 3.047 | 0.003 | 0.726 | 0.024 | 2.469 | 0.002 |
| 1376217_at   | BM388768  | cancer susceptibility candidate 1 (predicted)                        | Casc1_predicted    | 2.071 | 0.151 | 1.975 | 0.045 | 3.037 | 0.153 | 1.915 | 0.053 |
| 1397571_at   | BF554256  | Cancer susceptibility candidate 3                                    | Casc3              | 1.670 | 0.454 | 0.919 | 0.936 | 0.904 | 0.862 | 0.860 | 0.060 |
| 1368808_at   | NM_022383 | CAP, adenylate cyclase-associated protein 1 (yeast)                  | Cap1               | 1.785 | 0.039 | 0.990 | 0.364 | 0.985 | 0.720 | 0.883 | 0.197 |
| 1368809_at   | BG380723  | CAP, adenylate cyclase-associated protein 1 (yeast)                  | Cap1               | 1.637 | 0.066 | 1.181 | 0.274 | 1.426 | 0.141 | 1.377 | 0.061 |
| 1382322_a_at | AI029769  | capicua homolog (Drosophila) (predicted)                             | Cic_predicted      | 0.967 | 0.824 | 2.017 | 0.029 | 1.228 | 0.933 | 1.604 | 0.033 |
| 1399043_at   | AI175266  | capping protein (actin filament) muscle Z-line, alpha 2              | Capza2             | 0.950 | 0.426 | 1.092 | 0.131 | 1.199 | 0.362 | 1.016 | 0.077 |
| 1399091_at   | AI232101  | capping protein (actin filament) muscle Z-line, beta                 | Capzb              | 1.123 | 0.558 | 0.927 | 0.443 | 0.927 | 0.842 | 0.961 | 0.360 |
| 1374481_at   | AA946502  | cappuccino homolog (mouse)                                           | Cno                | 0.770 | 0.501 | 1.154 | 0.433 | 0.912 | 0.811 | 1.129 | 0.993 |
| 1371797_at   | BM391890  | carbaryl phosphatase 2 (mapped)                                      | Cad_mapped         | 0.666 | 0.520 | 1.665 | 0.018 | 0.764 | 0.824 | 1.482 | 0.050 |
| 1376697_at   | BI275885  | carbohydrate sulfotransferase 12                                     | Chst12             | 0.868 | 0.643 | 0.671 | 0.319 | 0.925 | 0.654 | 0.609 | 0.338 |
| 1395684_at   | AW534805  | Carbonic anhydrase 14 (predicted)                                    | Car14_predicted    | 0.954 | 0.404 | 0.545 | 0.001 | 1.006 | 0.984 | 0.553 | 0.009 |
| 1373790_at   | AI045400  | carbonic anhydrase 14 (predicted)                                    | Car14_predicted    | 1.113 | 0.559 | 0.313 | 0.001 | 1.096 | 0.144 | 0.283 | 0.002 |
| 1386922_at   | AI408948  | carbonic anhydrase 2                                                 | Ca2                | 1.608 | 0.021 | 1.028 | 0.568 | 1.744 | 0.042 | 1.105 | 0.786 |
| 1367733_at   | NM_019291 | carbonic anhydrase 2                                                 | Ca2                | 3.636 | 0.046 | 1.387 | 0.108 | 1.048 | 0.838 | 1.032 | 0.850 |
| 1398431_at   | BI294910  | carbonic anhydrase 8                                                 | Car8               | 1.152 | 0.871 | 1.818 | 0.025 | 1.016 | 0.101 | 1.072 | 0.557 |
| 1390498_at   | AI230554  | Carbonic anhydrase VB, mitochondrial                                 | Ca5b               | 0.991 | 0.038 | 0.310 | 0.039 | 0.657 | 0.164 | 0.306 | 0.038 |
| 1377573_at   | AI411132  | carbonic anhydrase VB, mitochondrial                                 | Ca5b               | 0.303 | 0.097 | 0.541 | 0.119 | 0.520 | 0.563 | 0.576 | 0.069 |
| 1390807_at   | BG375352  | carbonic anhydrase VB, mitochondrial                                 | Ca5b               | 0.548 | 0.911 | 0.277 | 0.062 | 0.853 | 0.656 | 0.191 | 0.043 |
| 1375529_at   | BF404908  | carbonic reductase 4                                                 | Cbr4               | 0.835 | 0.200 | 0.506 | 0.176 | 0.748 | 0.380 | 0.729 | 0.085 |
| 1368037_at   | NM_019170 | carbonyl reductase 1                                                 | Cbr1               | 0.434 | 0.303 | 0.744 | 0.106 | 0.219 | 0.004 | 0.760 | 0.395 |
| 1397427_at   | BI302102  | Carboxylesterase 3                                                   | Ces3               | 1.011 | 0.987 | 1.072 | 0.236 | 1.133 | 0.570 | 1.215 | 0.932 |
| 1369657_at   | NM_016998 | carboxypeptidase A1                                                  | Cpa1               | 0.999 | 0.955 | 0.755 | 0.440 | 1.000 | 0.632 | 0.754 | 0.441 |
| 1393397_at   | AI576488  | carboxypeptidase A2 (pancreatic) (predicted)                         | Cpa2_predicted     | 0.353 | 0.024 | 0.248 | 0.003 | 0.467 | 0.073 | 0.168 | 0.035 |
| 1386921_at   | NM_013128 | carboxypeptidase E                                                   | Cpe                | 0.752 | 0.015 | 0.848 | 0.007 | 0.932 | 0.163 | 0.908 | 0.014 |
| 1387503_at   | NM_053526 | carboxypeptidase N, polypeptide 1, 50kD                              | Cpn1               | 0.266 | 0.000 | 0.405 | 0.008 | 0.364 | 0.003 | 0.497 | 0.032 |
| 1374672_at   | BI293060  | cardiac ankyrin repeat kinase                                        | Cark               | 1.751 | 0.058 | 0.965 | 0.263 | 1.363 | 0.129 | 1.037 | 0.325 |
| 1374846_at   | AI230884  | cardiac lineage protein 1                                            | Clp1               | 0.549 | 0.003 | 0.816 | 0.089 | 0.639 | 0.034 | 1.050 | 0.948 |
| 1371886_at   | AI411979  | carnitine acetyltransferase                                          | Crat               | 0.399 | 0.004 | 0.813 | 0.063 | 0.425 | 0.052 | 1.301 | 0.367 |
| 1394038_at   | BG371654  | carnitine deficiency-associated gene expressed in ventricle 1        | Cdv1               | 0.583 | 0.098 | 0.614 | 0.008 | 0.861 | 0.078 | 0.650 | 0.004 |
| 1395387_at   | BI293317  | carnitine deficiency-associated gene expressed in ventricle 1        | Cdv1               | 0.585 | 0.436 | 0.938 | 0.055 | 0.964 | 0.435 | 0.982 | 0.933 |
| 1368426_at   | NM_031987 | carnitine O-octanoyltransferase                                      | Crot               | 4.313 | 0.002 | 2.081 | 0.049 | 7.459 | 0.001 | 1.534 | 0.024 |
| 1386946_at   | NM_031559 | carnitine palmitoyltransferase 1a, liver                             | Cpt1a              | 2.030 | 0.114 | 0.802 | 0.249 | 1.683 | 0.342 | 0.650 | 0.078 |
| 1367742_at   | NM_013200 | carnitine palmitoyltransferase 1b, muscle                            | Cpt1b              | 0.818 | 0.723 | 0.762 | 0.159 | 1.296 | 0.162 | 0.727 | 0.077 |
| 1386927_at   | NM_012930 | carnitine palmitoyltransferase 2                                     | Cpt2               | 0.295 | 0.042 | 0.167 | 0.001 | 0.307 | 0.000 | 0.209 | 0.022 |
| 1390569_at   | AI231438  | carnosine dipeptidase 1 (metallopeptidase M20 family)                | Cndp1              | 0.936 | 0.551 | 1.005 | 0.928 | 0.958 | 0.557 | 1.001 | 0.941 |
| 1377044_at   | AW143175  | Cartilage acidic protein 1                                           | Crtac1             | 0.905 | 0.600 | 1.332 | 0.196 | 1.914 | 0.025 | 1.000 | 0.920 |
| 1374646_at   | BM387173  | Casein kinase 1, alpha 1                                             | Csnk1a1            | 0.825 | 0.226 | 0.748 | 0.025 | 0.933 | 0.383 | 0.922 | 0.167 |
| 1369312_a_at | U77583    | casein kinase 1, alpha 1                                             | Csnk1a1            | 0.715 | 0.364 | 0.950 | 0.778 | 0.648 | 0.316 | 0.931 | 0.938 |
| 1394689_at   | BE117217  | Casein kinase 1, alpha 1                                             | Csnk1a1            | 1.152 | 0.674 | 1.125 | 0.964 | 1.154 | 0.639 | 0.858 | 0.198 |
| 1389859_at   | AI235291  | Casein kinase 1, alpha 1                                             | Csnk1a1            | 1.006 | 0.953 | 0.670 | 0.131 | 1.119 | 0.473 | 0.723 | 0.211 |
| 1370819_at   | AB063114  | casein kinase 1, delta                                               | Csnk1d             | 1.295 | 0.179 | 3.344 | 0.004 | 1.003 | 0.748 | 2.098 | 0.019 |
| 1373332_at   | AA946432  | Casein kinase 1, delta                                               | Csnk1d             | 0.898 | 0.204 | 0.694 | 0.001 | 1.076 | 0.551 | 0.663 | 0.055 |
| 1370527_a_at | L07578    | casein kinase 1, delta                                               | Csnk1d             | 1.136 | 0.737 | 7.928 | 0.031 | 1.386 | 0.096 | 3.664 | 0.002 |
| 1387108_at   | BF281311  | casein kinase 2, beta subunit                                        | Csnk2b             | 0.689 | 0.884 | 1.323 | 0.141 | 0.541 | 0.144 | 1.238 | 0.204 |
| 1375636_at   | AI600042  | Casein kinase II, alpha 1 polypeptide                                | Csnk2a1            | 0.567 | 0.019 | 0.936 | 0.276 | 0.620 | 0.001 | 0.933 | 0.071 |

|              |           |                                                                                   |                    |        |       |        |       |        |       |        |       |
|--------------|-----------|-----------------------------------------------------------------------------------|--------------------|--------|-------|--------|-------|--------|-------|--------|-------|
| 1376616_at   | BF551036  | Casein kinase II, alpha 1 polypeptide                                             | Csnk2a1            | 0.365  | 0.041 | 0.465  | 0.001 | 0.408  | 0.038 | 0.576  | 0.015 |
| 1384339_s_at | BF288177  | casein kinase II, alpha 1 polypeptide                                             | Csnk2a1            | 0.956  | 0.578 | 0.389  | 0.171 | 0.948  | 0.681 | 0.769  | 0.095 |
| 1382160_at   | AI236331  | Casein kinase II, alpha 2, polypeptide (predicted)                                | Csnk2a2_predicted  | 1.773  | 0.021 | 3.051  | 0.004 | 1.815  | 0.023 | 2.537  | 0.015 |
| 1371326_at   | BI276957  | casein kinase II, alpha 2, polypeptide (predicted)                                | Csnk2a2_predicted  | 1.310  | 0.101 | 1.575  | 0.001 | 1.699  | 0.005 | 1.696  | 0.024 |
| 1378282_at   | BI290750  | casein kinase II, alpha 2, polypeptide (predicted)                                | Csnk2a2_predicted  | 0.956  | 0.900 | 1.762  | 0.020 | 0.805  | 0.890 | 2.470  | 0.013 |
| 1377192_a_at | BM384629  | caseinolytic peptidase X (E.coli)                                                 | Clpx               | 1.370  | 0.199 | 2.435  | 0.000 | 1.010  | 0.905 | 1.669  | 0.044 |
| 1398698_at   | BG371721  | Caseinolytic peptidase X (E.coli)                                                 | Clpx               | 2.001  | 0.440 | 1.917  | 0.121 | 1.339  | 0.523 | 1.947  | 1.000 |
| 1371027_at   | BF556820  | Casitas B-lineage lymphoma b                                                      | Cblb               | 1.000  | 0.115 | 1.423  | 0.106 | 1.069  | 0.699 | 1.107  | 0.297 |
| 1392847_at   | BE118227  | Casitas B-lineage lymphoma-like 1 (predicted)                                     | Cbl11_predicted    | 0.844  | 0.156 | 2.251  | 0.004 | 1.211  | 0.394 | 1.710  | 0.011 |
| 1372434_at   | BE098114  | CASK-interacting protein CIP98                                                    | Cip98              | 1.797  | 0.004 | 4.242  | 0.001 | 1.117  | 0.682 | 2.903  | 0.001 |
| 1368545_at   | NM_057138 | CASP8 and FADD-like apoptosis regulator                                           | Cflar              | 7.503  | 0.001 | 4.484  | 0.000 | 1.724  | 0.581 | 2.697  | 0.002 |
| 1392386_at   | AI578435  | CASP8 and FADD-like apoptosis regulator                                           | Cflar              | 2.269  | 0.007 | 1.146  | 0.797 | 1.624  | 0.046 | 1.409  | 0.096 |
| 1391811_at   | AI556437  | CASP8 and FADD-like apoptosis regulator                                           | Cflar              | 1.393  | 0.285 | 0.822  | 0.395 | 1.734  | 0.094 | 0.445  | 0.474 |
| 1379919_at   | AI575276  | CASP8 and FADD-like apoptosis regulator                                           | Cflar              | 0.929  | 0.332 | 0.652  | 0.136 | 1.015  | 0.727 | 0.931  | 0.473 |
| 1387605_at   | NM_130422 | caspace 12                                                                        | Casp12             | 1.501  | 0.110 | 1.028  | 0.426 | 3.641  | 0.025 | 1.092  | 0.115 |
| 1367890_at   | NM_022522 | caspace 2                                                                         | Casp2              | 1.281  | 0.428 | 0.957  | 0.415 | 0.879  | 0.663 | 0.878  | 0.005 |
| 1390386_at   | BM387008  | caspace 3, apoptosis related cysteine protease                                    | Casp3              | 2.508  | 0.072 | 0.688  | 0.090 | 3.127  | 0.073 | 1.735  | 0.311 |
| 1381173_at   | BG375010  | Caspase 4, apoptosis-related cysteine peptidase                                   | Casp4              | 17.972 | 0.004 | 5.704  | 0.001 | 15.891 | 0.004 | 17.306 | 0.009 |
| 1387818_at   | NM_053736 | caspace 4, apoptosis-related cysteine peptidase                                   | Casp4              | 18.891 | 0.007 | 41.240 | 0.005 | 26.132 | 0.005 | 65.607 | 0.001 |
| 1389170_at   | BF283754  | caspace 7                                                                         | Casp7              | 0.396  | 0.454 | 0.571  | 0.007 | 0.306  | 0.170 | 0.721  | 0.061 |
| 1369557_at   | NM_022260 | caspace 7                                                                         | Casp7              | 0.922  | 0.781 | 0.640  | 0.152 | 1.005  | 0.745 | 0.639  | 0.148 |
| 1369262_at   | NM_022277 | caspace 8                                                                         | Casp8              | 1.084  | 0.827 | 1.002  | 0.978 | 1.090  | 0.078 | 1.014  | 0.880 |
| 1373194_at   | BF282281  | caspace 8 associated protein 2 (predicted)                                        | Casp8ap2_predicted | 0.438  | 0.057 | 0.352  | 0.031 | 0.535  | 0.011 | 0.723  | 0.113 |
| 1382586_at   | AW919926  | Caspase 8 associated protein 2 (predicted)                                        | Casp8ap2_predicted | 1.024  | 0.558 | 0.718  | 0.101 | 1.101  | 0.559 | 1.028  | 0.751 |
| 1373440_at   | AI175525  | caspace 8 associated protein 2 (predicted)                                        | Casp8ap2_predicted | 0.518  | 0.618 | 1.073  | 0.609 | 0.713  | 0.541 | 1.580  | 0.050 |
| 1370962_at   | AI136555  | castration induced prostatic apoptosis-related protein 1                          | Cipar1             | 0.998  | 0.875 | 0.947  | 0.198 | 1.001  | 0.988 | 0.975  | 0.291 |
| 1367995_at   | NM_012520 | catalase                                                                          | Cat                | 0.793  | 0.526 | 1.957  | 0.001 | 0.722  | 0.493 | 2.116  | 0.004 |
| 1376228_at   | BF419434  | Catalytic/ protein phosphatase type 2C                                            | ---                | 1.005  | 0.901 | 1.002  | 0.961 | 5.313  | 0.077 | 1.055  | 0.759 |
| 1368826_at   | NM_012531 | catechol-O-methyltransferase                                                      | Comt               | 1.183  | 0.215 | 2.799  | 0.003 | 1.921  | 0.039 | 2.914  | 0.001 |
| 1373150_at   | AW251225  | catechol-O-methyltransferase domain containing 1 (predicted)                      | Comtd1_predicted   | 1.001  | 0.990 | 1.292  | 0.141 | 0.999  | 0.996 | 2.004  | 0.035 |
| 1398354_at   | AI555457  | catenin (cadherin associated protein), alpha-like 1 (predicted)                   | Ctnn11_predicted   | 0.451  | 0.007 | 0.416  | 0.006 | 0.286  | 0.022 | 0.369  | 0.005 |
| 1369733_at   | NM_053357 | catenin (cadherin associated protein), beta 1                                     | Ctnnb1             | 2.447  | 0.335 | 1.567  | 0.035 | 0.927  | 0.977 | 0.860  | 0.520 |
| 1373067_at   | AI102738  | Catenin (cadherin associated protein), beta 1                                     | Ctnnb1             | 1.149  | 0.426 | 0.952  | 0.554 | 0.952  | 0.563 | 0.903  | 0.437 |
| 1388415_at   | BE109560  | catenin (cadherin associated protein), delta 1 (predicted)                        | Ctnnd1_predicted   | 1.522  | 0.015 | 0.902  | 0.926 | 1.489  | 0.048 | 1.069  | 0.277 |
| 1371921_at   | BM986272  | catenin (cadherin-associated protein), alpha 1                                    | Catna1             | 1.391  | 0.001 | 1.666  | 0.000 | 1.291  | 0.054 | 1.488  | 0.018 |
| 1390723_at   | BF386742  | Catenin (cadherin-associated protein), alpha 1                                    | Catna1             | 1.631  | 0.039 | 0.977  | 0.371 | 1.773  | 0.025 | 1.100  | 0.593 |
| 1367646_at   | NM_022597 | cathepsin B                                                                       | Ctsb               | 1.048  | 0.606 | 1.049  | 0.141 | 0.927  | 0.646 | 0.940  | 0.151 |
| 1367651_at   | NM_134334 | cathepsin D                                                                       | Ctsd               | 0.738  | 0.757 | 0.835  | 0.237 | 0.798  | 0.373 | 0.950  | 0.349 |
| 1373258_at   | AI169359  | cathepsin F                                                                       | Ctsf               | 0.563  | 0.304 | 0.441  | 0.025 | 0.535  | 0.001 | 0.368  | 0.025 |
| 1370244_at   | AI176595  | cathepsin L                                                                       | Ctsl               | 0.637  | 0.488 | 1.274  | 0.051 | 0.497  | 0.130 | 1.160  | 0.219 |
| 1370245_at   | AI232474  | cathepsin L                                                                       | Ctsl               | 0.782  | 0.944 | 2.807  | 0.003 | 0.427  | 0.150 | 2.624  | 0.007 |
| 1370885_at   | AA849399  | cathepsin Z                                                                       | Ctsz               | 1.033  | 0.815 | 0.857  | 0.047 | 0.976  | 0.869 | 0.805  | 0.790 |
| 1394735_at   | BF409552  | cation channel, sperm associated 2                                                | Catsper2           | 0.996  | 0.835 | 0.950  | 0.095 | 1.803  | 0.075 | 0.907  | 0.557 |
| 1387726_at   | NM_023963 | caudal type homeo box 2                                                           | Cdx2               | 0.965  | 0.843 | 0.996  | 0.797 | 0.951  | 0.402 | 1.072  | 0.350 |
| 1385519_at   | BE105678  | CBFA2T1 identified gene homolog (human) (predicted)                               | Cbfa2t1_predicted  | 1.199  | 0.294 | 0.810  | 0.404 | 0.385  | 0.062 | 1.302  | 0.697 |
| 1395076_at   | BE117804  | CBFA2T1 identified gene homolog (human) (predicted)                               | Cbfa2t1_predicted  | 1.438  | 0.762 | 0.620  | 0.175 | 0.907  | 0.947 | 0.761  | 0.367 |
| 1385215_at   | BF388857  | CBFA2T1 identified gene homolog (human) (predicted)                               | Cbfa2t1_predicted  | 0.856  | 0.862 | 0.792  | 0.570 | 0.978  | 0.872 | 1.040  | 0.727 |
| 1367602_at   | AI013390  | Cbp/p300-interacting transactivator, with Glu/Asp-rich carboxy-terminal domain, 2 | Cited2             | 0.074  | 0.114 | 0.695  | 0.391 | 0.464  | 0.237 | 0.835  | 0.578 |
| 1367601_at   | NM_053698 | Cbp/p300-interacting transactivator, with Glu/Asp-rich carboxy-terminal domain, 2 | Cited2             | 0.235  | 0.234 | 2.667  | 0.079 | 1.286  | 0.952 | 1.201  | 0.331 |
| 1384126_a_at | AW917217  | CCAAT/enhancer binding protein (C/EBP), alpha                                     | Cebpa              | 1.440  | 0.141 | 0.653  | 0.122 | 0.895  | 0.586 | 1.036  | 0.898 |
| 1398959_at   | AA850070  | CCAAT/enhancer binding protein (C/EBP), delta                                     | Cebpd              | 0.722  | 0.010 | 0.942  | 0.580 | 0.734  | 0.145 | 0.819  | 0.023 |
| 1387343_at   | NM_013154 | CCAAT/enhancer binding protein (C/EBP), delta                                     | Cebpd              | 2.342  | 0.017 | 10.822 | 0.006 | 1.112  | 0.045 | 5.419  | 0.005 |
| 1374842_at   | BF287009  | CCAAT/enhancer binding protein zeta (predicted)                                   | Cebpz_predicted    | 0.742  | 0.002 | 1.442  | 0.028 | 0.723  | 0.027 | 1.369  | 0.026 |
| 1370337_at   | AF133731  | CCCTC-binding factor                                                              | Ctcf               | 0.986  | 0.945 | 1.483  | 0.049 | 0.867  | 0.155 | 1.242  | 0.152 |
| 1372988_at   | BF397012  | CCR4-NOT transcription complex, subunit 10                                        | Cnot10             | 0.615  | 0.051 | 0.972  | 0.391 | 0.722  | 0.084 | 1.147  | 0.066 |
| 1376067_at   | AA800637  | CCR4-NOT transcription complex, subunit 2                                         | Cnot2              | 0.896  | 0.087 | 0.510  | 0.016 | 0.879  | 0.092 | 0.554  | 0.014 |
| 1373190_at   | AI101401  | CCR4-NOT transcription complex, subunit 4                                         | Cnot4              | 1.314  | 0.302 | 1.401  | 0.661 | 1.468  | 0.151 | 1.060  | 0.697 |
| 1393619_at   | AI045762  | CCR4-NOT transcription complex, subunit 6-like (predicted)                        | Cnot6l_predicted   | 1.076  | 0.409 | 0.672  | 0.025 | 1.436  | 0.022 | 1.107  | 0.512 |
| 1367515_at   | BE111850  | CCR4-NOT transcription complex, subunit 7 (predicted)                             | Cnot7_predicted    | 2.450  | 0.003 | 1.478  | 0.027 | 2.040  | 0.036 | 1.596  | 0.004 |
| 1379624_at   | AA964442  | CCR4-NOT transcription complex, subunit 8                                         | Cnot8              | 0.989  | 0.232 | 0.999  | 0.995 | 0.993  | 0.968 | 1.006  | 0.869 |
| 1372253_at   | AI408162  | CCR4-NOT transcription complex, subunit 8                                         | Cnot8              | 1.004  | 0.986 | 0.712  | 0.049 | 1.005  | 0.978 | 0.921  | 0.868 |

|              |           |                                                                                                       |                    |         |       |         |       |        |       |        |       |
|--------------|-----------|-------------------------------------------------------------------------------------------------------|--------------------|---------|-------|---------|-------|--------|-------|--------|-------|
| 1398827_at   | NM_013087 | CD 81 antigen                                                                                         | Cd81               | 1.023   | 0.966 | 0.969   | 0.323 | 1.027  | 0.346 | 1.110  | 0.176 |
| 1368490_at   | NM_021744 | CD14 antigen                                                                                          | Cd14               | 0.872   | 0.925 | 1.001   | 0.483 | 1.001  | 0.993 | 1.302  | 0.390 |
| 1367681_at   | NM_022523 | CD151 antigen                                                                                         | Cd151              | 0.745   | 0.101 | 0.703   | 0.049 | 0.620  | 0.089 | 0.422  | 0.027 |
| 1379716_at   | AA956555  | CD163 antigen (predicted)                                                                             | Cd163_predicted    | 1.166   | 0.806 | 0.867   | 0.640 | 1.066  | 0.620 | 0.858  | 0.274 |
| 1386886_at   | NM_031812 | CD164 antigen                                                                                         | Cd164              | 0.720   | 0.064 | 0.742   | 0.006 | 0.759  | 0.003 | 0.796  | 0.024 |
| 1393863_at   | AA999005  | CD180 antigen (predicted)                                                                             | Cd180_predicted    | 1.763   | 0.272 | 1.355   | 0.372 | 1.022  | 0.371 | 1.044  | 0.086 |
| 1368593_at   | NM_017079 | CD1d1 antigen                                                                                         | Cd1d1              | 0.497   | 0.889 | 1.505   | 0.311 | 0.700  | 0.548 | 1.574  | 0.012 |
| 1372036_at   | BG378032  | CD2 antigen (cytoplasmic tail) binding protein 2 (predicted)                                          | Cd2bp2_predicted   | 1.047   | 0.123 | 0.765   | 0.032 | 1.253  | 0.081 | 0.791  | 0.085 |
| 1385676_at   | BG379822  | CD2 antigen (cytoplasmic tail) binding protein 2 (predicted)                                          | Cd2bp2_predicted   | 0.664   | 0.330 | 1.394   | 0.015 | 1.017  | 0.706 | 1.006  | 0.165 |
| 1395530_at   | AI555739  | CD2 antigen (cytoplasmic tail) binding protein 2 (predicted)                                          | Cd2bp2_predicted   | 1.135   | 0.413 | 0.827   | 0.166 | 1.020  | 0.898 | 0.741  | 0.013 |
| 1380908_at   | AA924563  | Cd200 antigen                                                                                         | Cd200              | 1.570   | 0.126 | 0.726   | 0.766 | 1.306  | 0.445 | 0.998  | 0.984 |
| 1369670_at   | NM_031518 | Cd200 antigen                                                                                         | Cd200              | 1.001   | 0.989 | 1.042   | 0.564 | 0.689  | 0.031 | 0.806  | 0.031 |
| 1369953_a_at | BI285141  | CD24 antigen                                                                                          | Cd24               | 0.255   | 0.062 | 0.334   | 0.041 | 0.237  | 0.032 | 0.245  | 0.011 |
| 1383962_at   | BI275530  | Cd27 binding protein (Hindu God of destruction) (predicted)                                           | Siva_predicted     | 0.443   | 0.101 | 0.935   | 0.477 | 0.333  | 0.014 | 0.942  | 0.679 |
| 1374198_at   | BF398424  | CD276 antigen                                                                                         | Cd276              | 1.782   | 0.134 | 1.220   | 0.094 | 1.327  | 0.111 | 1.091  | 0.427 |
| 1372071_at   | AI102320  | CD320 antigen                                                                                         | Cd320              | 0.640   | 0.297 | 0.833   | 0.074 | 0.680  | 0.005 | 0.569  | 0.011 |
| 1368975_at   | NM_013127 | CD38 antigen                                                                                          | Cd38               | 1.464   | 0.176 | 1.714   | 0.765 | 1.697  | 0.282 | 2.339  | 0.278 |
| 1390325_at   | BI289418  | CD38 antigen                                                                                          | Cd38               | 1.199   | 0.853 | 0.901   | 0.514 | 1.191  | 0.297 | 0.992  | 0.740 |
| 1387952_a_at | AF065147  | CD44 antigen                                                                                          | Cd44               | 9.394   | 0.001 | 8.059   | 0.004 | 4.654  | 0.064 | 4.774  | 0.014 |
| 1368921_a_at | NM_012924 | CD44 antigen                                                                                          | Cd44               | 13.454  | 0.009 | 11.345  | 0.001 | 9.246  | 0.016 | 8.394  | 0.002 |
| 1369559_a_at | NM_019195 | CD47 antigen (Rh-related antigen, integrin-associated signal transducer)                              | Cd47               | 3.430   | 0.093 | 3.614   | 0.003 | 3.314  | 0.008 | 4.111  | 0.004 |
| 1367929_at   | NM_012925 | CD59 antigen                                                                                          | Cd59               | 0.690   | 0.002 | 0.223   | 0.000 | 0.807  | 0.004 | 0.345  | 0.001 |
| 1367709_at   | NM_017125 | CD63 antigen                                                                                          | Cd63               | 0.926   | 0.897 | 1.179   | 0.010 | 0.841  | 0.004 | 1.138  | 0.031 |
| 1384837_at   | AI137672  | CD69 antigen                                                                                          | Cd69               | 191.709 | 0.000 | 120.693 | 0.000 | 92.214 | 0.001 | 87.158 | 0.000 |
| 1367679_at   | NM_013069 | CD74 antigen (invariant polypeptide of major histocompatibility complex, class II antigen-associated) | Cd74               | 13.211  | 0.020 | 17.999  | 0.001 | 49.917 | 0.001 | 73.895 | 0.000 |
| 1386976_at   | NM_031797 | CD82 antigen                                                                                          | Cd82               | 3.404   | 0.001 | 10.516  | 0.000 | 5.886  | 0.001 | 11.892 | 0.000 |
| 1390529_at   | AI412355  | CD83 antigen (predicted)                                                                              | Cd83_predicted     | 4.692   | 0.000 | 1.561   | 0.190 | 12.975 | 0.004 | 2.058  | 0.009 |
| 1381206_at   | BE121026  | CD96 antigen                                                                                          | Cd96               | 1.030   | 0.072 | 1.766   | 0.020 | 1.129  | 0.021 | 2.445  | 0.006 |
| 1382527_at   | AI764706  | CD96 antigen                                                                                          | Cd96               | 0.431   | 0.224 | 1.153   | 0.108 | 0.909  | 0.453 | 0.995  | 0.661 |
| 1399141_at   | BF404428  | CDC like kinase 4                                                                                     | Clk4               | 1.087   | 0.579 | 1.224   | 0.056 | 1.163  | 0.844 | 0.992  | 0.438 |
| 1376544_at   | BF414624  | CDC14 cell division cycle 14 homolog A ( <i>S. cerevisiae</i> ) (predicted)                           | Cdc14a_predicted   | 2.090   | 0.210 | 1.298   | 0.374 | 0.896  | 0.232 | 1.183  | 0.899 |
| 1399074_at   | BI279569  | CDC16 cell division cycle 16 homolog ( <i>S. cerevisiae</i> )                                         | Cdc16              | 0.667   | 0.202 | 0.862   | 0.065 | 0.604  | 0.080 | 0.753  | 0.034 |
| 1389646_at   | BE100584  | CDC23 (cell division cycle 23, yeast, homolog)                                                        | Cdc23              | 0.593   | 0.078 | 0.572   | 0.003 | 0.544  | 0.120 | 0.691  | 0.216 |
| 1373246_at   | BF397920  | CDC23 (cell division cycle 23, yeast, homolog)                                                        | Cdc23              | 0.929   | 0.633 | 0.586   | 0.004 | 0.891  | 0.383 | 0.621  | 0.010 |
| 1396320_at   | BF396773  | Cdc2-related kinase, arginine/serine-rich                                                             | Crkrs              | 1.118   | 0.304 | 0.938   | 0.453 | 1.049  | 0.647 | 1.159  | 0.788 |
| 1387546_at   | NM_138916 | Cdc2-related kinase, arginine/serine-rich                                                             | Crkrs              | 1.288   | 0.387 | 1.448   | 0.065 | 1.395  | 0.369 | 1.016  | 0.868 |
| 1394887_x_at | AI407383  | Cdc2-related kinase, arginine/serine-rich                                                             | Crkrs              | 1.297   | 0.817 | 0.784   | 0.232 | 0.932  | 0.334 | 0.907  | 0.233 |
| 1375910_at   | AA874943  | CDC42 effector protein (Rho GTPase binding) 3 (predicted)                                             | Cdc42ep3_predicted | 1.248   | 0.085 | 1.359   | 0.058 | 1.110  | 0.030 | 1.184  | 0.230 |
| 1388730_at   | AI407903  | CDC42 effector protein (Rho GTPase binding) 4 (predicted)                                             | Cdc42ep4_predicted | 1.136   | 0.764 | 1.605   | 0.065 | 0.891  | 0.694 | 1.161  | 0.534 |
| 1397853_s_at | BG672534  | Cdc42 guanine nucleotide exchange factor (GEF) 9                                                      | Arhgef9            | 2.621   | 0.021 | 0.999   | 0.997 | 1.172  | 0.604 | 0.972  | 0.998 |
| 1388468_at   | BI284508  | CDC42 small effector 1                                                                                | Cdc42se1           | 0.557   | 0.072 | 1.283   | 0.041 | 0.618  | 0.055 | 1.021  | 0.433 |
| 1388530_at   | BM389459  | CDC42 small effector 1                                                                                | Cdc42se1           | 1.504   | 0.369 | 5.415   | 0.015 | 1.313  | 0.547 | 3.350  | 0.012 |
| 1374357_at   | AI713763  | CDC91 cell division cycle 91-like 1 ( <i>S. cerevisiae</i> )                                          | Cdc9111            | 1.259   | 0.135 | 0.909   | 0.438 | 1.012  | 0.987 | 0.890  | 0.366 |
| 1399022_at   | AI177513  | CDC-like kinase 1                                                                                     | Clk1               | 1.331   | 0.024 | 0.941   | 0.500 | 1.812  | 0.006 | 0.979  | 0.558 |
| 1368235_at   | NM_134340 | CDC-like kinase 3                                                                                     | Clk3               | 0.702   | 0.011 | 1.516   | 0.016 | 1.019  | 0.553 | 1.594  | 0.058 |
| 1398801_at   | NM_134415 | CDK105 protein                                                                                        | Cdk105             | 0.854   | 0.579 | 1.267   | 0.289 | 0.864  | 0.305 | 1.089  | 0.607 |
| 1388443_at   | AI177871  | CDK2 (cyclin-dependent kinase 2)-associated protein 1 (predicted)                                     | Cdk2ap1_predicted  | 0.542   | 0.251 | 0.654   | 0.004 | 0.324  | 0.002 | 0.610  | 0.018 |
| 1367879_at   | NM_024488 | CDK5 regulatory subunit associated protein 3                                                          | Cdk5rap3           | 0.961   | 0.804 | 1.113   | 0.061 | 1.025  | 0.742 | 0.999  | 0.965 |
| 1390214_a_at | BI284812  | CDKN1A interacting zinc finger protein 1 (predicted)                                                  | Ciz1_predicted     | 1.147   | 0.115 | 2.570   | 0.028 | 0.863  | 0.365 | 1.711  | 0.038 |
| 1392991_at   | AA859535  | CDNA clone IMAGE:7130415                                                                              | ---                | 0.740   | 0.029 | 1.144   | 0.812 | 0.697  | 0.038 | 0.985  | 0.440 |
| 1385965_at   | AI045533  | CDNA clone IMAGE:7131734                                                                              | ---                | 0.810   | 0.258 | 1.054   | 0.053 | 0.716  | 0.023 | 1.062  | 0.336 |
| 1394041_at   | BI293870  | CDNA clone IMAGE:7131734                                                                              | ---                | 0.776   | 0.277 | 1.174   | 0.009 | 0.793  | 0.141 | 1.046  | 0.090 |
| 1389287_at   | BI279573  | CDNA clone IMAGE:7193711                                                                              | ---                | 2.479   | 0.003 | 2.022   | 0.011 | 2.021  | 0.004 | 1.847  | 0.002 |
| 1373808_at   | BF417211  | CDNA clone IMAGE:7193711                                                                              | ---                | 1.737   | 0.469 | 2.395   | 0.000 | 1.270  | 0.728 | 2.434  | 0.009 |
| 1390227_at   | AI101017  | CDNA clone IMAGE:7300848                                                                              | ---                | 0.991   | 0.651 | 0.744   | 0.491 | 0.960  | 0.802 | 0.952  | 0.803 |
| 1390912_at   | BE101168  | CDNA clone IMAGE:7300848                                                                              | ---                | 0.999   | 0.733 | 0.660   | 0.037 | 1.002  | 0.994 | 0.659  | 0.039 |
| 1396091_at   | BI296193  | CDNA clone IMAGE:7301487                                                                              | ---                | 0.624   | 0.132 | 1.748   | 0.012 | 0.473  | 0.302 | 1.521  | 0.034 |
| 1375895_at   | BI275908  | CDNA clone IMAGE:7302535, with apparent retained intron                                               | ---                | 0.910   | 0.139 | 1.938   | 0.000 | 1.039  | 0.459 | 1.833  | 0.000 |
| 1393109_at   | BI274436  | CDNA clone IMAGE:7302574                                                                              | ---                | 0.223   | 0.101 | 0.093   | 0.000 | 0.184  | 0.011 | 0.130  | 0.006 |
| 1384453_at   | AI045824  | CDNA clone IMAGE:7303447                                                                              | ---                | 1.170   | 0.188 | 1.000   | 0.802 | 0.873  | 0.285 | 0.794  | 0.704 |
| 1371448_at   | AI599295  | CDNA clone IMAGE:7303896                                                                              | ---                | 0.615   | 0.159 | 0.598   | 0.036 | 0.621  | 0.029 | 0.972  | 0.354 |

|              |          |                                     |     |       |       |       |       |       |       |       |       |
|--------------|----------|-------------------------------------|-----|-------|-------|-------|-------|-------|-------|-------|-------|
| 1383349_at   | BE115594 | CDNA clone IMAGE:7304849            | --- | 2.719 | 0.003 | 1.113 | 0.234 | 5.913 | 0.000 | 1.816 | 0.006 |
| 1389545_at   | BF281994 | CDNA clone IMAGE:7307013            | --- | 1.686 | 0.101 | 1.662 | 0.002 | 1.181 | 0.309 | 1.810 | 0.005 |
| 1389601_at   | BI293610 | CDNA clone IMAGE:7308494            | --- | 1.260 | 0.774 | 1.451 | 0.726 | 1.628 | 0.145 | 1.220 | 0.161 |
| 1390449_at   | BI289132 | CDNA clone IMAGE:7309127            | --- | 1.085 | 0.028 | 1.233 | 0.311 | 2.614 | 0.013 | 2.214 | 0.026 |
| 1377922_at   | BE111094 | CDNA clone IMAGE:7312313            | --- | 1.259 | 0.220 | 0.808 | 0.021 | 1.130 | 0.404 | 0.945 | 0.844 |
| 1389331_at   | AI104371 | CDNA clone IMAGE:7313169            | --- | 1.128 | 0.208 | 1.427 | 0.008 | 1.552 | 0.013 | 1.673 | 0.002 |
| 1391639_at   | AI170084 | CDNA clone IMAGE:7313169            | --- | 0.844 | 0.585 | 0.924 | 0.810 | 1.883 | 0.193 | 1.391 | 0.200 |
| 1376892_at   | AI102061 | CDNA clone IMAGE:7313785            | --- | 0.624 | 0.154 | 0.148 | 0.005 | 0.771 | 0.389 | 0.200 | 0.002 |
| 1374161_at   | AI104686 | CDNA clone IMAGE:7316678            | --- | 0.450 | 0.052 | 0.683 | 0.015 | 0.620 | 0.081 | 0.742 | 0.009 |
| 1383705_at   | BG670702 | CDNA clone IMAGE:7317308            | --- | 0.561 | 0.690 | 1.886 | 0.270 | 0.596 | 0.190 | 1.121 | 0.618 |
| 1399062_at   | BI301008 | CDNA clone IMAGE:7317308            | --- | 0.962 | 0.933 | 1.480 | 0.182 | 0.636 | 0.573 | 1.336 | 0.117 |
| 1388700_at   | AW253004 | CDNA clone IMAGE:7317367            | --- | 1.239 | 0.007 | 1.074 | 0.812 | 0.953 | 0.316 | 0.964 | 0.486 |
| 1376764_at   | AI406412 | CDNA clone IMAGE:7319904            | --- | 0.672 | 0.224 | 0.153 | 0.000 | 0.719 | 0.015 | 0.120 | 0.016 |
| 1383127_at   | BI295823 | CDNA clone IMAGE:7320912            | --- | 0.744 | 0.049 | 0.436 | 0.003 | 0.695 | 0.006 | 0.656 | 0.029 |
| 1372760_at   | AI176579 | CDNA clone IMAGE:7321089            | --- | 1.020 | 0.815 | 1.428 | 0.048 | 0.961 | 0.744 | 1.199 | 0.083 |
| 1389986_at   | AI008409 | CDNA clone IMAGE:7321089            | --- | 1.178 | 0.875 | 1.131 | 0.125 | 1.156 | 0.146 | 1.067 | 0.103 |
| 1392904_at   | BF544602 | CDNA clone IMAGE:7321811            | --- | 1.162 | 0.467 | 1.181 | 0.149 | 1.060 | 0.763 | 1.171 | 0.176 |
| 1379341_at   | BG378132 | CDNA clone IMAGE:7322363            | --- | 1.220 | 0.298 | 2.833 | 0.024 | 1.272 | 0.116 | 2.340 | 0.001 |
| 1383400_at   | BI293535 | CDNA clone IMAGE:7324288            | --- | 1.152 | 0.088 | 1.037 | 0.170 | 0.709 | 0.052 | 0.993 | 0.408 |
| 1374509_at   | BI275722 | CDNA clone IMAGE:7324860            | --- | 0.570 | 0.017 | 0.493 | 0.002 | 0.499 | 0.061 | 0.569 | 0.005 |
| 1388710_at   | BI281986 | CDNA clone IMAGE:7365357            | --- | 1.036 | 0.960 | 1.481 | 0.001 | 0.643 | 0.023 | 1.159 | 0.493 |
| 1373943_at   | AI237047 | CDNA clone IMAGE:7365681            | --- | 0.789 | 0.036 | 0.583 | 0.001 | 0.748 | 0.035 | 0.690 | 0.000 |
| 1372308_at   | BM386869 | CDNA clone IMAGE:7366335            | --- | 0.812 | 0.386 | 0.747 | 0.244 | 0.364 | 0.033 | 0.610 | 0.018 |
| 1373520_at   | BI285960 | CDNA clone IMAGE:7367270            | --- | 1.633 | 0.047 | 1.410 | 0.039 | 1.200 | 0.085 | 0.781 | 0.528 |
| 1399028_at   | AI171954 | CDNA clone IMAGE:7367808            | --- | 1.330 | 0.094 | 1.116 | 0.224 | 1.289 | 0.004 | 1.123 | 0.077 |
| 1395584_at   | C06826   | CDNA clone IMAGE:7367808            | --- | 1.398 | 0.154 | 1.024 | 0.889 | 1.306 | 0.127 | 1.012 | 0.682 |
| 1390621_at   | BG376889 | CDNA clone IMAGE:7367808            | --- | 1.294 | 0.392 | 0.777 | 0.506 | 0.756 | 0.274 | 0.774 | 0.150 |
| 1373405_at   | AI410762 | CDNA clone IMAGE:7373898            | --- | 2.148 | 0.130 | 1.088 | 0.276 | 2.586 | 0.077 | 1.468 | 0.035 |
| 1379597_at   | AI011037 | CDNA clone IMAGE:7375470            | --- | 0.358 | 0.004 | 0.833 | 0.361 | 0.849 | 0.071 | 0.624 | 0.759 |
| 1372624_at   | BF551377 | CDNA clone IMAGE:7375734            | --- | 1.360 | 0.017 | 0.597 | 0.009 | 1.152 | 0.042 | 0.830 | 0.137 |
| 1385667_x_at | AI029796 | CDNA clone IMAGE:7379585            | --- | 0.726 | 0.000 | 0.476 | 0.004 | 0.737 | 0.038 | 0.528 | 0.009 |
| 1383194_a_at | AI030349 | CDNA clone IMAGE:7379585            | --- | 0.558 | 0.018 | 0.490 | 0.001 | 0.580 | 0.002 | 0.539 | 0.059 |
| 1385540_at   | AI044916 | CDNA clone IMAGE:7379764            | --- | 1.604 | 0.046 | 0.463 | 0.005 | 1.204 | 0.303 | 0.484 | 0.020 |
| 1386258_at   | AA945099 | CDNA clone IMAGE:7386859            | --- | 0.683 | 0.067 | 0.970 | 0.298 | 0.947 | 0.817 | 1.141 | 0.758 |
| 1383629_a_at | BI289966 | CDNA clone IMAGE:7386859            | --- | 0.735 | 0.075 | 0.977 | 0.037 | 0.767 | 0.424 | 1.099 | 0.747 |
| 1374368_at   | BI291066 | CDNA clone IMAGE:7389555            | --- | 0.886 | 0.119 | 1.438 | 0.021 | 0.711 | 0.097 | 1.471 | 0.005 |
| 1393704_at   | AI136988 | CDNA clone IMAGE:7442534            | --- | 1.123 | 0.339 | 1.379 | 0.043 | 1.018 | 0.973 | 1.637 | 0.190 |
| 1376014_at   | AI045725 | CDNA clone IMAGE:7453109            | --- | 1.009 | 0.990 | 0.908 | 0.250 | 1.022 | 0.921 | 0.680 | 0.187 |
| 1389142_at   | AI013361 | CDNA clone IMAGE:7455024            | --- | 0.680 | 0.588 | 0.425 | 0.002 | 0.612 | 0.173 | 0.442 | 0.003 |
| 1378446_at   | BI283723 | CDNA clone IMAGE:7457557            | --- | 0.928 | 0.837 | 0.653 | 0.090 | 1.051 | 0.964 | 0.886 | 0.074 |
| 1379558_at   | AA957033 | CDNA clone IMAGE:7930522            | --- | 1.286 | 0.119 | 0.346 | 0.001 | 6.189 | 0.000 | 1.150 | 0.922 |
| 1371721_at   | BI281103 | CDNA clone IMAGE:7932112            | --- | 0.839 | 0.280 | 1.324 | 0.260 | 1.448 | 0.292 | 1.648 | 0.064 |
| 1374635_at   | AW527151 | CDNA clone IMAGE:7932607            | --- | 1.285 | 0.785 | 0.640 | 0.242 | 1.002 | 0.989 | 1.002 | 0.998 |
| 1383896_at   | BM387943 | CDNA clone MGC:105591 IMAGE:7313723 | --- | 0.685 | 0.078 | 1.702 | 0.004 | 0.999 | 0.463 | 1.579 | 0.104 |
| 1371460_at   | AA859261 | CDNA clone MGC:105597 IMAGE:7314502 | --- | 0.682 | 0.582 | 0.895 | 0.774 | 0.510 | 0.052 | 1.083 | 0.734 |
| 1394388_at   | AA858844 | CDNA clone MGC:105701 IMAGE:7309421 | --- | 0.635 | 0.191 | 1.016 | 0.637 | 0.650 | 0.019 | 1.083 | 0.169 |
| 1383912_at   | BM390524 | CDNA clone MGC:109201 IMAGE:7306744 | --- | 1.823 | 0.035 | 2.294 | 0.006 | 2.058 | 0.007 | 2.493 | 0.001 |
| 1371401_at   | BI278836 | CDNA clone MGC:109637 IMAGE:7367801 | --- | 0.592 | 0.984 | 0.670 | 0.091 | 0.660 | 0.904 | 0.766 | 0.107 |
| 1399007_at   | BF557930 | CDNA clone MGC:109642 IMAGE:7368024 | --- | 0.645 | 0.362 | 0.745 | 0.624 | 0.693 | 0.021 | 0.900 | 0.311 |
| 1371434_at   | AI172362 | CDNA clone MGC:112638 IMAGE:7376647 | --- | 1.402 | 0.104 | 1.838 | 0.003 | 1.399 | 0.007 | 2.159 | 0.000 |
| 1388572_at   | BM389961 | CDNA clone MGC:112923 IMAGE:7380411 | --- | 0.726 | 0.008 | 0.701 | 0.408 | 0.769 | 0.290 | 1.128 | 0.257 |
| 1391997_at   | AW523656 | CDNA clone MGC:112923 IMAGE:7380411 | --- | 1.004 | 0.952 | 1.001 | 0.189 | 0.991 | 0.989 | 0.939 | 0.067 |
| 1398006_at   | AI454795 | CDNA clone MGC:116179 IMAGE:7455942 | --- | 0.999 | 0.993 | 1.020 | 0.174 | 1.519 | 0.209 | 1.003 | 0.941 |
| 1375296_at   | AI407178 | CDNA clone MGC:125029 IMAGE:7458016 | --- | 0.694 | 0.004 | 1.433 | 0.005 | 0.786 | 0.004 | 1.256 | 0.025 |
| 1371956_at   | BG372686 | CDNA clone MGC:93760 IMAGE:7108525  | --- | 0.509 | 0.152 | 0.427 | 0.001 | 0.463 | 0.011 | 0.489 | 0.002 |
| 1398360_at   | AI009805 | CDNA clone MGC:93791 IMAGE:7109632  | --- | 0.908 | 0.885 | 1.491 | 0.039 | 0.702 | 0.014 | 1.379 | 0.005 |
| 1371856_at   | AI408941 | CDNA clone MGC:93828 IMAGE:7110880  | --- | 1.095 | 0.128 | 1.084 | 0.747 | 1.361 | 0.008 | 1.033 | 0.334 |
| 1397313_at   | AI716841 | CDNA clone MGC:93828 IMAGE:7110880  | --- | 1.019 | 0.997 | 0.879 | 0.589 | 1.064 | 0.992 | 0.397 | 0.091 |
| 1389387_at   | BF561377 | CDNA clone MGC:93913 IMAGE:7112877  | --- | 2.314 | 0.116 | 2.189 | 0.026 | 3.205 | 0.002 | 3.653 | 0.007 |
| 1367490_at   | AI102046 | CDNA clone MGC:94668 IMAGE:7192222  | --- | 0.594 | 0.022 | 0.601 | 0.036 | 0.496 | 0.025 | 0.801 | 0.318 |
| 1372340_at   | BM386355 | CDNA clone MGC:94725 IMAGE:7193416  | --- | 0.778 | 0.656 | 1.128 | 0.252 | 0.810 | 0.492 | 1.063 | 0.103 |



|              |           |                                                                                           |                  |       |       |       |       |        |       |       |       |
|--------------|-----------|-------------------------------------------------------------------------------------------|------------------|-------|-------|-------|-------|--------|-------|-------|-------|
| 1398942_at   | BI278885  | CDNA clone MGC:95041 IMAGE:7123253                                                        | ---              | 0.554 | 0.078 | 0.556 | 0.000 | 0.697  | 0.007 | 0.789 | 0.008 |
| 1384256_at   | BI293599  | CDNA clone MGC:95252 IMAGE:7133376                                                        | ---              | 0.664 | 0.050 | 0.938 | 0.991 | 0.592  | 0.007 | 0.941 | 0.906 |
| 1368248_at   | NM_031242 | CDP-diacylglycerol synthase 1                                                             | Cds1             | 0.848 | 0.745 | 1.862 | 0.002 | 1.733  | 0.031 | 2.019 | 0.001 |
| 1387900_at   | DM2928    | CDP-diacylglycerol--inositol 3-phosphatidyltransferase (phosphatidylinositol synthase)    | Cdipt            | 0.805 | 0.335 | 0.940 | 0.174 | 0.810  | 0.039 | 0.930 | 0.327 |
| 1368480_at   | NM_053492 | CDW92 antigen                                                                             | Cdw92            | 2.753 | 0.001 | 1.151 | 0.250 | 2.399  | 0.002 | 1.261 | 0.156 |
| 1379130_at   | BF396303  | CDW92 antigen                                                                             | Cdw92            | 1.155 | 0.070 | 1.064 | 0.086 | 1.129  | 0.495 | 0.978 | 0.675 |
| 1372651_at   | AI144726  | CDW92 antigen                                                                             | Cdw92            | 1.189 | 0.370 | 1.194 | 0.000 | 1.688  | 0.212 | 0.298 | 0.082 |
| 1370935_at   | AI105205  | CDW92 antigen                                                                             | Cdw92            | 1.263 | 0.384 | 0.640 | 0.111 | 1.268  | 0.333 | 0.568 | 0.093 |
| 1381870_at   | BG377539  | CDW92 antigen                                                                             | Cdw92            | 0.931 | 0.677 | 0.753 | 0.258 | 1.095  | 0.082 | 0.734 | 0.178 |
| 1373054_at   | AA801076  | CDW92 antigen                                                                             | Cdw92            | 0.902 | 0.723 | 0.585 | 0.064 | 1.084  | 0.895 | 0.659 | 0.168 |
| 1374620_at   | BM392373  | CEA-related cell adhesion molecule 1                                                      | Ceacam1          | 1.033 | 0.771 | 0.543 | 0.013 | 1.391  | 0.218 | 0.623 | 0.010 |
| 1385767_at   | BF411017  | cell adhesion molecule JCAM                                                               | LOC304000        | 0.777 | 0.166 | 0.677 | 0.035 | 1.389  | 0.471 | 0.829 | 0.700 |
| 1396317_at   | AI764350  | cell cycle progression 1 (predicted)                                                      | Ccpg1_predicted  | 0.536 | 0.083 | 0.214 | 0.000 | 0.778  | 0.024 | 0.358 | 0.006 |
| 1375027_at   | AI407365  | Cell cycle progression 1 (predicted)                                                      | Ccpg1_predicted  | 0.577 | 0.370 | 0.679 | 0.010 | 0.620  | 0.063 | 0.660 | 0.006 |
| 1376199_at   | BF419187  | cell cycle related kinase                                                                 | Ccrk             | 0.802 | 0.306 | 0.966 | 0.803 | 0.767  | 0.240 | 0.686 | 0.715 |
| 1387371_at   | NM_133571 | cell division cycle 25 homolog A (S. cerevisiae)                                          | Cdc25a           | 1.101 | 0.202 | 1.531 | 0.002 | 0.959  | 0.502 | 1.461 | 0.003 |
| 1377558_at   | BF393165  | Cell division cycle 25 homolog A (S. cerevisiae)                                          | Cdc25a           | 1.258 | 0.787 | 1.507 | 0.620 | 1.094  | 0.280 | 1.051 | 0.240 |
| 1370034_at   | NM_133572 | cell division cycle 25 homolog B (S. cerevisiae)                                          | Cdc25b           | 0.986 | 0.618 | 0.257 | 0.005 | 0.996  | 0.958 | 0.219 | 0.002 |
| 1388727_at   | BM387151  | cell division cycle 26                                                                    | Cdc26            | 0.609 | 0.070 | 0.339 | 0.003 | 0.348  | 0.011 | 0.437 | 0.021 |
| 1372339_at   | AA866438  | cell division cycle 26                                                                    | Cdc26            | 1.138 | 0.141 | 1.038 | 0.464 | 0.799  | 0.122 | 0.732 | 0.106 |
| 1388534_at   | AA851369  | Cell division cycle 26                                                                    | Cdc26            | 0.471 | 0.635 | 1.267 | 0.038 | 0.425  | 0.100 | 0.936 | 0.072 |
| 1382664_at   | AW525662  | cell division cycle 27 homolog (S. cerevisiae)                                            | Cdc27            | 1.377 | 0.112 | 2.107 | 0.001 | 0.987  | 0.361 | 1.354 | 0.007 |
| 1393534_at   | AI059500  | Cell division cycle 2-like 5 (cholinesterase-related cell division controller)            | Cdc215           | 1.687 | 0.074 | 1.055 | 0.823 | 1.008  | 0.436 | 0.851 | 0.922 |
| 1386164_at   | AI170800  | Cell division cycle 2-like 5 (cholinesterase-related cell division controller)            | Cdc215           | 1.000 | 0.734 | 1.490 | 0.018 | 0.999  | 0.109 | 0.828 | 0.837 |
| 1398574_a_at | AI170800  | cell division cycle 2-like 5 (cholinesterase-related cell division controller)            | Cdc215           | 0.986 | 0.761 | 1.135 | 0.805 | 0.797  | 0.133 | 1.054 | 0.343 |
| 1388286_a_at | L38482    | cell division cycle 34 homolog (S. cerevisiae) (predicted)                                | Cdc34_predicted  | 0.789 | 0.425 | 2.568 | 0.009 | 0.969  | 0.439 | 2.393 | 0.001 |
| 1388400_at   | BG375350  | cell division cycle 34 homolog (S. cerevisiae) (predicted)                                | Cdc34_predicted  | 1.199 | 0.799 | 1.929 | 0.002 | 0.965  | 0.867 | 2.314 | 0.008 |
| 1367453_at   | NM_053743 | cell division cycle 37 homolog (S. cerevisiae)                                            | Cdc37            | 0.932 | 0.971 | 1.819 | 0.017 | 0.792  | 0.073 | 1.460 | 0.034 |
| 1374074_at   | BF285292  | cell division cycle 37 homolog (S. cerevisiae)-like 1                                     | Cdc37l1          | 0.629 | 0.137 | 0.611 | 0.026 | 0.701  | 0.074 | 0.647 | 0.016 |
| 1392673_at   | BF552510  | cell division cycle 37 homolog (S. cerevisiae)-like 1                                     | Cdc37l1          | 1.045 | 0.615 | 1.853 | 0.265 | 0.881  | 0.769 | 2.138 | 0.168 |
| 1388724_at   | BF284434  | cell division cycle 40 homolog (yeast) (predicted)                                        | Cdc40_predicted  | 0.909 | 0.896 | 1.420 | 0.095 | 0.715  | 0.129 | 1.527 | 0.106 |
| 1370825_a_at | AA925473  | cell division cycle 42 homolog (S. cerevisiae)                                            | Cdc42            | 0.913 | 0.939 | 1.387 | 0.006 | 0.837  | 0.248 | 1.284 | 0.031 |
| 1398793_at   | NM_053527 | cell division cycle 5-like (S. pombe)                                                     | Cdc5l            | 0.697 | 0.412 | 0.933 | 0.765 | 0.653  | 0.362 | 1.051 | 0.366 |
| 1379346_at   | BI290578  | cell division cycle 73, Paf1/RNA polymerase II complex component, homolog (S. cerevisiae) | Cdc73            | 0.828 | 0.578 | 1.454 | 0.063 | 0.924  | 0.750 | 1.176 | 0.130 |
| 1383940_at   | BG375704  | cell division cycle associated 1                                                          | Cdca1            | 1.003 | 0.987 | 0.635 | 0.101 | 1.344  | 0.219 | 0.637 | 0.095 |
| 1374739_at   | AI236771  | cell division cycle associated 4                                                          | Cdca4            | 0.927 | 0.629 | 1.355 | 0.624 | 1.206  | 0.851 | 1.253 | 0.315 |
| 1387244_at   | NM_053899 | cell growth regulator with ring finger domain 1                                           | Cgrrf1           | 1.381 | 0.233 | 1.915 | 0.011 | 1.225  | 0.260 | 2.233 | 0.000 |
| 1368141_at   | AF242550  | cellular nucleic acid binding protein 1                                                   | Cnbp1            | 0.957 | 0.824 | 1.189 | 0.069 | 0.838  | 0.380 | 1.288 | 0.001 |
| 1381968_at   | AI029175  | cellular repressor of E1A-stimulated genes (predicted)                                    | Creg_predicted   | 0.833 | 0.295 | 7.041 | 0.001 | 0.774  | 0.188 | 4.657 | 0.001 |
| 1375428_at   | BE099979  | cellular repressor of E1A-stimulated genes (predicted)                                    | Creg_predicted   | 0.955 | 0.452 | 2.810 | 0.007 | 1.034  | 0.829 | 1.360 | 0.100 |
| 1369725_at   | NM_020101 | centaurin, alpha 2                                                                        | Centa2           | 1.475 | 0.797 | 0.889 | 0.506 | 1.264  | 0.279 | 0.879 | 0.299 |
| 1392815_at   | BE114489  | Centaurin, delta 1 (predicted)                                                            | Centd1_predicted | 3.366 | 0.002 | 1.332 | 0.005 | 1.985  | 0.022 | 1.113 | 0.057 |
| 1388511_at   | AI412079  | centaurin, delta 2                                                                        | Centd2           | 1.890 | 0.000 | 1.358 | 0.936 | 1.760  | 0.042 | 1.173 | 0.639 |
| 1377926_at   | AA924061  | Centaurin, gamma 2 (predicted)                                                            | Centg2_predicted | 1.166 | 0.629 | 1.028 | 0.063 | 0.728  | 0.273 | 1.534 | 0.811 |
| 1383834_at   | BI285391  | centaurin, gamma 3 (predicted)                                                            | Centg3_predicted | 0.856 | 0.380 | 0.907 | 0.306 | 0.672  | 0.126 | 0.762 | 0.131 |
| 1375977_at   | AA958015  | centrin 2                                                                                 | Cetn2            | 0.608 | 0.508 | 0.482 | 0.000 | 0.700  | 0.070 | 0.795 | 0.021 |
| 1388141_at   | BI293883  | centrin 3                                                                                 | Cetn3            | 0.975 | 0.325 | 1.512 | 0.065 | 0.604  | 0.043 | 1.249 | 0.343 |
| 1385349_at   | BF389818  | centrin 4 (predicted)                                                                     | Cetn4_predicted  | 1.561 | 0.063 | 0.606 | 0.162 | 1.439  | 0.176 | 0.747 | 0.168 |
| 1372883_at   | BE109061  | centromere autoantigen B (predicted)                                                      | Cenpb_predicted  | 0.744 | 0.007 | 0.910 | 0.739 | 0.650  | 0.010 | 1.000 | 0.894 |
| 1379538_at   | BE104961  | centromere protein J (predicted)                                                          | Cenpj_predicted  | 5.322 | 0.009 | 2.700 | 0.042 | 11.664 | 0.017 | 2.727 | 0.002 |
| 1382613_at   | AW144049  | Centrosomal protein 152 (predicted)                                                       | Cep152_predicted | 1.766 | 0.221 | 4.401 | 0.000 | 0.836  | 0.415 | 3.785 | 0.040 |
| 1382765_at   | AA996645  | centrosomal protein 27 (predicted)                                                        | Cep27_predicted  | 0.652 | 0.125 | 1.589 | 0.063 | 0.640  | 0.202 | 1.588 | 0.058 |
| 1377829_at   | BI291153  | centrosomal protein 57                                                                    | Cep57            | 0.577 | 0.027 | 0.624 | 0.018 | 0.482  | 0.030 | 0.639 | 0.011 |
| 1378274_at   | BF389658  | Centrosomal protein 76                                                                    | Cep76            | 0.665 | 0.184 | 1.222 | 0.023 | 0.935  | 0.753 | 1.151 | 0.147 |
| 1385824_at   | BF388819  | centrosome-associated protein 350                                                         | Cap350           | 1.252 | 0.409 | 2.262 | 0.076 | 2.184  | 0.035 | 3.107 | 0.135 |
| 1375987_at   | AW525194  | ceramide kinase (predicted)                                                               | Cerk_predicted   | 0.794 | 0.192 | 0.444 | 0.003 | 0.662  | 0.004 | 0.542 | 0.015 |
| 1374139_at   | BG671589  | cerebellar degeneration-related 2                                                         | Cdr2             | 0.659 | 0.888 | 2.466 | 0.001 | 0.957  | 0.912 | 2.250 | 0.003 |
| 1381972_at   | BG673626  | cereblon                                                                                  | Crbn             | 0.689 | 0.115 | 0.837 | 0.127 | 0.831  | 0.143 | 0.957 | 0.279 |
| 1377047_at   | AI710879  | Cereblon                                                                                  | Crbn             | 0.789 | 0.555 | 0.312 | 0.003 | 0.757  | 0.059 | 0.401 | 0.006 |
| 1383177_at   | AI232085  | Cereblon                                                                                  | Crbn             | 0.666 | 0.644 | 0.648 | 0.081 | 0.729  | 0.270 | 0.635 | 0.032 |
| 1378479_at   | BI285912  | ceroid lipofuscinosis, neuronal 3, juvenile (Batten, Spielmeier-Vogt disease)             | Cln3             | 1.138 | 0.385 | 1.781 | 0.159 | 6.791  | 0.015 | 1.434 | 0.310 |

|              |           |                                                               |                  |         |       |         |       |         |       |         |       |
|--------------|-----------|---------------------------------------------------------------|------------------|---------|-------|---------|-------|---------|-------|---------|-------|
| 1389598_at   | BI280367  | ceroid-lipofuscinosis, neuronal 6 (predicted)                 | Cln6_predicted   | 0.357   | 0.001 | 0.977   | 0.623 | 0.352   | 0.007 | 0.917   | 0.047 |
| 1375026_at   | AI105369  | ceroid-lipofuscinosis, neuronal 6 (predicted)                 | Cln6_predicted   | 0.771   | 0.294 | 1.018   | 0.987 | 0.579   | 0.024 | 0.569   | 0.365 |
| 1389791_at   | AI179775  | ceroid-lipofuscinosis, neuronal 8                             | Cln8             | 0.198   | 0.119 | 0.388   | 0.000 | 0.302   | 0.000 | 0.483   | 0.001 |
| 1368419_at   | AF202115  | ceruloplasmin                                                 | Cp               | 65.875  | 0.000 | 38.543  | 0.000 | 145.013 | 0.000 | 41.980  | 0.000 |
| 1368418_a_at | AF202115  | ceruloplasmin                                                 | Cp               | 38.320  | 0.002 | 41.974  | 0.000 | 52.472  | 0.000 | 60.254  | 0.002 |
| 1368420_at   | NM_012532 | ceruloplasmin                                                 | Cp               | 57.870  | 0.002 | 40.226  | 0.002 | 121.710 | 0.000 | 55.033  | 0.005 |
| 1374557_at   | BF394235  | CG6210-like                                                   | LOC362065        | 0.498   | 0.376 | 0.999   | 0.990 | 0.508   | 0.316 | 1.109   | 0.799 |
| 1382427_at   | BG373237  | CGG triplet repeat binding protein 1 (predicted)              | Cggbp1_predicted | 2.508   | 0.080 | 10.231  | 0.016 | 1.413   | 0.021 | 4.339   | 0.074 |
| 1375280_at   | AW913871  | CGI-146 protein                                               | PNAS-4           | 0.664   | 0.669 | 1.772   | 0.055 | 0.774   | 0.292 | 1.729   | 0.331 |
| 1376312_a_at | BI284236  | CGI-146 protein                                               | PNAS-4           | 0.989   | 0.964 | 1.276   | 0.972 | 1.202   | 0.898 | 1.589   | 0.090 |
| 1380665_at   | BF418059  | CGI-58-like protein                                           | LOC316122        | 1.401   | 0.028 | 1.350   | 0.046 | 1.112   | 0.088 | 1.228   | 0.063 |
| 1389573_at   | AI170665  | ChaC, cation transport regulator-like 1 (E. coli) (predicted) | Chac1_predicted  | 2.182   | 0.085 | 1.485   | 0.063 | 1.237   | 0.900 | 1.054   | 0.061 |
| 1372536_at   | AI105042  | chaperone, ABC1 activity of bc1 complex like (S. pombe)       | Cabc1            | 0.314   | 0.003 | 0.084   | 0.001 | 0.316   | 0.001 | 0.120   | 0.017 |
| 1371418_at   | BG665035  | chaperonin containing TCPI, subunit 2 (beta)                  | Cct2             | 0.499   | 0.120 | 1.032   | 0.496 | 0.477   | 0.056 | 0.889   | 0.337 |
| 1371403_at   | AA799545  | chaperonin subunit 3 (gamma)                                  | Cct3             | 0.787   | 0.120 | 1.684   | 0.001 | 0.588   | 0.003 | 1.407   | 0.002 |
| 1390261_at   | AI059850  | Chaperonin subunit 3 (gamma)                                  | Cct3             | 1.381   | 0.164 | 1.904   | 0.003 | 1.208   | 0.882 | 1.482   | 0.009 |
| 1371656_at   | BI283657  | chaperonin subunit 4 (delta)                                  | Cct4             | 0.830   | 0.277 | 1.747   | 0.000 | 0.722   | 0.014 | 1.538   | 0.006 |
| 1376570_at   | BF417274  | chaperonin subunit 5 (epsilon)                                | Cct5             | 0.839   | 0.535 | 1.813   | 0.006 | 0.668   | 0.014 | 1.793   | 0.005 |
| 1395508_at   | BG665309  | chaperonin subunit 5 (epsilon)                                | Cct5             | 0.545   | 0.904 | 0.998   | 0.995 | 0.787   | 0.146 | 1.430   | 0.352 |
| 1398960_at   | AI172328  | chaperonin subunit 6a (zeta)                                  | Cct6a            | 0.895   | 0.149 | 1.108   | 0.294 | 0.765   | 0.012 | 1.126   | 0.282 |
| 1377006_at   | AA875047  | Chaperonin subunit 6a (zeta)                                  | Cct6a            | 0.998   | 0.990 | 1.116   | 0.321 | 0.791   | 0.489 | 0.899   | 0.138 |
| 1371641_at   | BM388827  | chaperonin subunit 7 (eta) (predicted)                        | Cct7_predicted   | 0.793   | 0.326 | 1.731   | 0.003 | 0.817   | 0.061 | 1.592   | 0.003 |
| 1392918_at   | BE115650  | chaperonin subunit 8 (theta) (predicted)                      | Cct8_predicted   | 0.737   | 0.257 | 1.343   | 0.000 | 0.626   | 0.049 | 1.188   | 0.001 |
| 1373784_at   | BF409759  | chaperonin subunit 8 (theta) (predicted)                      | Cct8_predicted   | 0.991   | 0.979 | 0.771   | 0.592 | 1.065   | 0.203 | 1.072   | 0.798 |
| 1372787_at   | BE106508  | charged amino acid rich leucine zipper 1                      | Crlz1            | 0.994   | 0.888 | 2.184   | 0.006 | 0.969   | 0.993 | 1.877   | 0.008 |
| 1387062_a_at | NM_080400 | checkpoint kinase 1 homolog (S. pombe)                        | Chek1            | 1.459   | 0.061 | 2.029   | 0.064 | 1.977   | 0.002 | 0.989   | 0.234 |
| 1384728_at   | BE112826  | checkpoint suppressor 1 (predicted)                           | Ches1_predicted  | 1.125   | 0.296 | 1.003   | 0.981 | 1.085   | 0.324 | 1.154   | 0.164 |
| 1377713_at   | AI639381  | checkpoint suppressor 1 (predicted)                           | Ches1_predicted  | 1.403   | 0.406 | 0.870   | 0.509 | 0.760   | 0.557 | 0.852   | 0.081 |
| 1383313_at   | BE120149  | checkpoint with forkhead and ring finger domains              | Chfr             | 0.911   | 0.583 | 0.559   | 0.001 | 0.876   | 0.155 | 0.597   | 0.005 |
| 1367973_at   | NM_031530 | chemokine (C-C motif) ligand 2                                | Ccl2             | 962.723 | 0.005 | 511.882 | 0.004 | 987.110 | 0.004 | 124.055 | 0.002 |
| 1369814_at   | AF053312  | chemokine (C-C motif) ligand 20                               | Ccl20            | 168.860 | 0.000 | 139.685 | 0.000 | 62.205  | 0.006 | 14.863  | 0.004 |
| 1376850_a_at | AI058901  | chemokine (C-C motif) ligand 27 (predicted)                   | Ccl27_predicted  | 1.012   | 0.096 | 0.976   | 0.602 | 1.002   | 0.558 | 1.000   | 0.996 |
| 1369983_at   | NM_031116 | chemokine (C-C motif) ligand 5                                | Ccl5             | 0.597   | 0.317 | 4.418   | 0.009 | 77.432  | 0.000 | 182.099 | 0.000 |
| 1379935_at   | BF419899  | chemokine (C-C motif) ligand 7                                | Ccl7             | 131.265 | 0.001 | 59.296  | 0.000 | 128.020 | 0.001 | 7.414   | 0.001 |
| 1392737_at   | AI044644  | Chemokine (C-C motif) receptor 5                              | Ccr5             | 0.741   | 0.396 | 0.994   | 0.782 | 0.913   | 0.218 | 1.049   | 0.323 |
| 1398591_at   | AI707080  | chemokine (C-C motif) receptor-like 2 (predicted)             | Ccr12_predicted  | 1.006   | 0.988 | 1.002   | 0.977 | 2.962   | 0.037 | 0.997   | 0.983 |
| 1368200_at   | NM_134455 | chemokine (C-X3-C motif) ligand 1                             | Cx3cl1           | 13.041  | 0.013 | 1.005   | 0.826 | 13.329  | 0.007 | 1.003   | 0.321 |
| 1387316_at   | NM_030845 | chemokine (C-X-C motif) ligand 1                              | Cxcl1            | 392.450 | 0.000 | 189.826 | 0.001 | 36.359  | 0.024 | 6.641   | 0.002 |
| 1387969_at   | U22520    | chemokine (C-X-C motif) ligand 10                             | Cxcl10           | 262.954 | 0.015 | 80.668  | 0.019 | 332.406 | 0.014 | 188.777 | 0.012 |
| 1379365_at   | BF281987  | chemokine (C-X-C motif) ligand 11                             | Cxcl11           | 79.732  | 0.005 | 128.180 | 0.010 | 93.689  | 0.005 | 151.358 | 0.009 |
| 1369633_at   | AI171777  | chemokine (C-X-C motif) ligand 12                             | Cxcl12           | 1.500   | 0.032 | 1.181   | 0.196 | 1.486   | 0.169 | 1.064   | 0.083 |
| 1368760_at   | NM_053647 | chemokine (C-X-C motif) ligand 2                              | Cxcl2            | 282.144 | 0.001 | 47.336  | 0.001 | 15.910  | 0.056 | 1.535   | 0.332 |
| 1382454_at   | AI044222  | chemokine (C-X-C motif) ligand 9                              | Cxcl9            | 290.483 | 0.000 | 197.180 | 0.005 | 913.843 | 0.001 | 334.675 | 0.004 |
| 1373544_at   | AI170387  | chemokine (C-X-C motif) ligand 9                              | Cxcl9            | 238.152 | 0.001 | 199.846 | 0.003 | 587.954 | 0.002 | 287.997 | 0.002 |
| 1387984_at   | AF253065  | chemokine-like factor                                         | Ck1f             | 6.669   | 0.039 | 2.309   | 0.123 | 4.576   | 0.028 | 2.638   | 0.039 |
| 1387956_s_at | AF253064  | chemokine-like factor                                         | Ck1f             | 2.138   | 0.336 | 1.920   | 0.126 | 3.283   | 0.294 | 2.760   | 0.062 |
| 1381009_at   | BF403637  | Chemokine-like receptor 1                                     | Cmklr1           | 1.049   | 0.911 | 0.997   | 0.249 | 0.996   | 0.983 | 0.999   | 0.544 |
| 1368287_at   | NM_032083 | chimerin (chimaerin) 1                                        | Chn1             | 1.072   | 0.208 | 0.754   | 0.025 | 1.461   | 0.250 | 1.091   | 0.551 |
| 1391386_at   | AI412693  | Chimerin (chimaerin) 1                                        | Chn1             | 1.000   | 0.630 | 1.189   | 0.896 | 0.883   | 0.592 | 0.950   | 0.562 |
| 1368331_at   | NM_031023 | chitobiase, di-N-acetyl-                                      | Ctbs             | 0.955   | 0.377 | 1.080   | 0.521 | 1.104   | 0.779 | 1.222   | 0.405 |
| 1369010_at   | NM_053677 | CHK2 checkpoint homolog (S. pombe)                            | Chek2            | 1.191   | 0.613 | 0.622   | 0.168 | 0.960   | 0.698 | 0.673   | 0.167 |
| 1392453_at   | AI763523  | chloride channel 3                                            | Clcn3            | 0.767   | 0.254 | 0.853   | 0.119 | 0.550   | 0.068 | 1.017   | 0.135 |
| 1380547_at   | BI288519  | chloride channel 3                                            | Clcn3            | 0.578   | 0.277 | 0.649   | 0.171 | 0.399   | 0.222 | 0.644   | 0.152 |
| 1367893_a_at | NM_133414 | chloride channel CLIC-like 1                                  | Clcc1            | 0.825   | 0.629 | 1.363   | 0.125 | 0.733   | 0.105 | 0.850   | 0.185 |
| 1367772_at   | NM_031719 | chloride channel, nucleotide-sensitive, 1A                    | Clns1a           | 0.807   | 0.064 | 0.928   | 0.186 | 0.872   | 0.087 | 1.171   | 0.159 |
| 1375633_at   | AI012221  | chloride intracellular channel 1                              | Clic1            | 1.658   | 0.036 | 1.416   | 0.057 | 1.316   | 0.040 | 1.136   | 0.004 |
| 1381993_at   | BI293548  | chloride intracellular channel 2                              | Clic2            | 2.540   | 0.782 | 1.012   | 0.810 | 2.748   | 0.231 | 0.985   | 0.922 |
| 1377765_at   | AA848723  | chloride intracellular channel 4                              | Clic4            | 5.623   | 0.071 | 6.054   | 0.025 | 7.158   | 0.001 | 6.352   | 0.002 |
| 1387420_at   | NM_031818 | chloride intracellular channel 4                              | Clic4            | 1.396   | 0.117 | 1.375   | 0.164 | 1.729   | 0.196 | 1.377   | 0.053 |
| 1387032_at   | NM_012829 | cholecystokinin                                               | Cck              | 0.987   | 0.925 | 1.105   | 0.803 | 0.989   | 0.896 | 1.109   | 0.926 |
| 1369787_at   | NM_012688 | cholecystokinin A receptor                                    | Cckar            | 0.229   | 0.003 | 0.055   | 0.001 | 0.253   | 0.017 | 0.106   | 0.036 |

|              |           |                                                                                 |                  |       |       |       |       |       |       |       |       |
|--------------|-----------|---------------------------------------------------------------------------------|------------------|-------|-------|-------|-------|-------|-------|-------|-------|
| 1380063_at   | AI169398  | cholesterol 25-hydroxylase                                                      | Ch25h            | 2.241 | 0.163 | 0.983 | 0.734 | 4.340 | 0.050 | 0.989 | 0.777 |
| 1368692_a_at | AW140851  | choline kinase alpha                                                            | Chka             | 1.369 | 0.299 | 2.113 | 0.001 | 1.037 | 0.699 | 1.450 | 0.005 |
| 1367718_at   | NM_017177 | choline kinase beta                                                             | Chkb             | 0.948 | 0.803 | 0.992 | 0.246 | 0.935 | 0.386 | 0.784 | 0.027 |
| 1379770_at   | BF282951  | choline phosphotransferase 1                                                    | Chpt1            | 0.724 | 0.121 | 0.840 | 0.205 | 0.725 | 0.120 | 0.846 | 0.250 |
| 1388977_at   | BM390401  | choline/ethanolamine phosphotransferase 1                                       | Cept1            | 1.282 | 0.379 | 1.909 | 0.003 | 1.884 | 0.051 | 2.155 | 0.006 |
| 1387462_at   | NM_012527 | cholinergic receptor, muscarinic 3                                              | Chrm3            | 0.935 | 0.940 | 1.058 | 0.830 | 0.917 | 0.675 | 0.766 | 0.798 |
| 1395429_at   | BF281401  | Cholinergic receptor, nicotinic, alpha polypeptide 7                            | Chrna7           | 1.428 | 0.259 | 1.597 | 0.308 | 1.864 | 0.134 | 1.932 | 0.124 |
| 1369091_at   | NM_012528 | cholinergic receptor, nicotinic, beta polypeptide 1 (muscle)                    | Chrnb1           | 0.976 | 0.318 | 0.678 | 0.367 | 1.021 | 0.113 | 0.907 | 0.431 |
| 1373561_at   | AI012498  | chondroitin polymerizing factor                                                 | D1bwg1363e       | 0.560 | 0.113 | 0.517 | 0.003 | 0.556 | 0.030 | 0.410 | 0.010 |
| 1390072_at   | BF401531  | Chondroitin sulfate proteoglycan 4                                              | Cspg4            | 0.999 | 0.831 | 1.094 | 0.512 | 0.998 | 0.995 | 1.007 | 0.509 |
| 1387080_at   | NM_031583 | chondroitin sulfate proteoglycan 6                                              | Cspg6            | 0.757 | 0.330 | 1.017 | 0.541 | 0.693 | 0.003 | 0.900 | 0.308 |
| 1390668_at   | BG378312  | chondroitin sulfate proteoglycan 6                                              | Cspg6            | 0.891 | 0.771 | 1.571 | 0.727 | 1.268 | 0.503 | 2.371 | 0.295 |
| 1388943_at   | BI279670  | chromatin accessibility complex 1 (predicted)                                   | Chrac1_predicted | 0.914 | 0.498 | 0.654 | 0.078 | 0.977 | 0.884 | 0.826 | 0.199 |
| 1367512_at   | AA998435  | chromatin modifying protein 5                                                   | Chmp5            | 1.141 | 0.128 | 1.175 | 0.027 | 1.454 | 0.009 | 1.323 | 0.018 |
| 1388510_at   | BI289511  | chromatin modifying protein 6 (predicted)                                       | Chmp6_predicted  | 0.685 | 0.216 | 1.394 | 0.022 | 0.487 | 0.049 | 1.069 | 0.020 |
| 1374695_at   | BF564593  | Chromobox homolog 1 (Drosophila HP1 beta) (predicted)                           | Cbx1_predicted   | 1.610 | 0.013 | 1.777 | 0.004 | 2.003 | 0.000 | 1.658 | 0.003 |
| 1385157_at   | BF389675  | chromobox homolog 1 (Drosophila HP1 beta) (predicted)                           | Cbx1_predicted   | 1.327 | 0.116 | 2.648 | 0.016 | 2.953 | 0.002 | 1.630 | 0.025 |
| 1371395_at   | AA851329  | chromobox homolog 3 (HP1 gamma homolog, Drosophila)                             | Cbx3             | 0.651 | 0.002 | 0.804 | 0.015 | 0.515 | 0.014 | 0.803 | 0.002 |
| 1373885_at   | BF398015  | chromobox homolog 5 (Drosophila HP1a) (predicted)                               | Cbx5_predicted   | 0.972 | 0.575 | 1.544 | 0.110 | 1.412 | 0.396 | 1.377 | 0.215 |
| 1375307_at   | BI275772  | chromobox homolog 6                                                             | Cbx6             | 0.646 | 0.135 | 0.491 | 0.053 | 0.546 | 0.219 | 0.624 | 0.030 |
| 1371672_at   | AI406275  | chromobox homolog 7                                                             | Cbx7             | 0.257 | 0.020 | 0.347 | 0.008 | 0.577 | 0.064 | 0.465 | 0.022 |
| 1376008_at   | BI275819  | chromobox homolog 8 (Drosophila, Pc class)                                      | Cbx8             | 0.909 | 0.575 | 0.910 | 0.087 | 0.892 | 0.309 | 0.501 | 0.077 |
| 1389469_at   | AA858645  | chromodomain helicase DNA binding protein 1-like (predicted)                    | Chd11_predicted  | 1.585 | 0.060 | 0.771 | 0.417 | 1.245 | 0.364 | 0.727 | 0.062 |
| 1379830_at   | BF396633  | Chromodomain helicase DNA binding protein 2 (predicted)                         | Chd2_predicted   | 1.533 | 0.023 | 1.345 | 0.013 | 1.403 | 0.077 | 1.426 | 0.001 |
| 1397779_at   | BF562254  | Chromodomain helicase DNA binding protein 2 (predicted)                         | Chd2_predicted   | 0.976 | 0.063 | 0.984 | 0.123 | 1.049 | 0.734 | 1.459 | 0.054 |
| 1381683_at   | BE118824  | chromodomain helicase DNA binding protein 2 (predicted)                         | Chd2_predicted   | 1.101 | 0.966 | 1.324 | 0.386 | 1.003 | 0.471 | 1.579 | 0.568 |
| 1397200_at   | BF412612  | chromodomain helicase DNA binding protein 4                                     | Chd4             | 0.768 | 0.091 | 0.744 | 0.293 | 0.667 | 0.028 | 0.704 | 0.120 |
| 1385779_at   | BF413917  | chromodomain helicase DNA binding protein 4                                     | Chd4             | 0.873 | 0.107 | 0.996 | 0.348 | 0.874 | 0.425 | 0.987 | 0.801 |
| 1372441_at   | BE107091  | chromodomain helicase DNA binding protein 4                                     | Chd4             | 0.684 | 0.420 | 0.889 | 0.988 | 0.979 | 0.466 | 1.115 | 0.292 |
| 1379580_at   | BF398050  | chromodomain helicase DNA binding protein 6 (predicted)                         | Chd6_predicted   | 0.536 | 0.042 | 0.405 | 0.002 | 0.711 | 0.323 | 0.675 | 0.145 |
| 1378361_at   | BF523068  | chromodomain helicase DNA binding protein 7 (predicted)                         | Chd7_predicted   | 1.012 | 0.088 | 1.390 | 0.107 | 0.789 | 0.991 | 1.219 | 0.299 |
| 1382504_at   | AI599104  | chromodomain helicase DNA binding protein 7 (predicted)                         | Chd7_predicted   | 0.980 | 0.999 | 1.001 | 0.992 | 0.981 | 0.696 | 0.999 | 0.993 |
| 1375527_at   | BF282681  | chromodomain helicase DNA binding protein 8                                     | Chd8             | 0.581 | 0.312 | 1.149 | 0.284 | 1.039 | 0.806 | 1.125 | 0.558 |
| 1387235_at   | NM_021655 | chromogranin A                                                                  | Chga             | 0.639 | 0.425 | 0.299 | 0.001 | 0.649 | 0.013 | 0.266 | 0.007 |
| 1368034_at   | NM_012526 | chromogranin B                                                                  | Chgb             | 0.793 | 0.267 | 0.298 | 0.000 | 0.664 | 0.003 | 0.346 | 0.004 |
| 1398974_at   | AI171615  | chromosome segregation 1-like (S. cerevisiae) (predicted)                       | Cse11_predicted  | 0.677 | 0.468 | 1.216 | 0.008 | 0.705 | 0.015 | 1.004 | 0.204 |
| 1399094_at   | AA859919  | churchill domain containing 1 (predicted)                                       | Churc1_predicted | 0.800 | 0.461 | 0.932 | 0.451 | 0.892 | 0.599 | 0.759 | 0.845 |
| 1370107_at   | NM_054009 | chymotrypsin-like                                                               | Ctrl             | 1.001 | 0.998 | 1.255 | 0.328 | 5.248 | 0.100 | 2.721 | 0.029 |
| 1369951_at   | NM_012536 | Chymotrypsinogen B                                                              | Ctrb             | 0.920 | 0.122 | 0.226 | 0.111 | 1.400 | 0.085 | 0.256 | 0.029 |
| 1389577_at   | AI101160  | cirrhosis, autosomal recessive 1A (human)                                       | Cirh1a           | 0.364 | 0.012 | 1.050 | 0.582 | 0.364 | 0.005 | 1.377 | 0.089 |
| 1386942_at   | NM_022596 | cis-Golgi matrix protein GM130                                                  | Golga2           | 0.821 | 0.965 | 1.182 | 0.023 | 0.705 | 0.402 | 0.861 | 0.519 |
| 1374190_at   | BG380750  | citrate lyase beta like                                                         | Clybl            | 0.662 | 0.227 | 0.117 | 0.000 | 0.643 | 0.214 | 0.112 | 0.016 |
| 1369967_at   | NM_130755 | citrate synthase                                                                | Cs               | 0.755 | 0.293 | 3.233 | 0.012 | 0.582 | 0.281 | 2.756 | 0.003 |
| 1375295_at   | AI009657  | Citrate synthase                                                                | Cs               | 0.732 | 0.451 | 1.421 | 0.006 | 0.602 | 0.004 | 1.311 | 0.023 |
| 1389137_at   | AA957183  | Citron                                                                          | Cit              | 0.802 | 0.281 | 1.088 | 0.565 | 0.675 | 0.120 | 0.800 | 0.226 |
| 1372056_at   | AI406687  | CKLF-like MARVEL transmembrane domain containing 6                              | Cmtm6            | 2.346 | 0.004 | 1.068 | 0.370 | 4.077 | 0.001 | 1.898 | 0.026 |
| 1398842_at   | BM386513  | clathrin, heavy polypeptide (Hc)                                                | Cltc             | 0.601 | 0.001 | 0.636 | 0.004 | 0.730 | 0.001 | 0.751 | 0.044 |
| 1386875_a_at | M19261    | clathrin, light polypeptide (Lca)                                               | Clta             | 1.164 | 0.589 | 2.035 | 0.003 | 0.985 | 0.936 | 1.866 | 0.007 |
| 1375324_at   | BE095893  | Clathrin, light polypeptide (Lcb)                                               | Cltb             | 0.402 | 0.485 | 0.901 | 0.730 | 0.468 | 0.084 | 0.782 | 0.218 |
| 1367907_a_at | M19262    | clathrin, light polypeptide (Lcb)                                               | Cltb             | 0.687 | 0.548 | 1.208 | 0.914 | 0.538 | 0.004 | 0.851 | 0.255 |
| 1376711_at   | BG673439  | claudin 11                                                                      | Cldn11           | 0.652 | 0.019 | 1.581 | 0.097 | 1.785 | 0.002 | 1.507 | 0.211 |
| 1369184_at   | NM_131905 | claudin 16                                                                      | Cldn16           | 1.013 | 0.972 | 0.998 | 0.956 | 1.006 | 0.939 | 1.000 | 0.983 |
| 1388547_at   | BE328951  | claudin 4                                                                       | Cldn4            | 9.737 | 0.001 | 4.206 | 0.004 | 3.533 | 0.154 | 2.279 | 0.016 |
| 1370894_at   | AJ011811  | claudin 7                                                                       | Cldn7            | 1.236 | 0.473 | 1.336 | 0.941 | 0.859 | 0.276 | 1.000 | 0.999 |
| 1390407_at   | AA955196  | claudin domain containing 1                                                     | Cldnd1           | 0.713 | 0.361 | 1.006 | 0.091 | 0.663 | 0.013 | 0.889 | 0.165 |
| 1377935_at   | AI231223  | Claudin domain containing 1                                                     | Cldnd1           | 0.640 | 0.423 | 0.963 | 0.058 | 0.796 | 0.228 | 0.686 | 0.081 |
| 1377670_at   | AW915580  | cleavage and polyadenylation factor subunit homolog (S. cerevisiae) (predicted) | Pcf11_predicted  | 1.150 | 0.054 | 0.765 | 0.032 | 1.246 | 0.014 | 0.867 | 0.067 |
| 1374666_at   | BI298206  | Cleavage and polyadenylation factor subunit homolog (S. cerevisiae) (predicted) | Pcf11_predicted  | 0.658 | 0.058 | 0.953 | 0.798 | 0.924 | 0.073 | 0.905 | 0.590 |
| 1393692_at   | AA965160  | cleavage and polyadenylation factor subunit homolog (S. cerevisiae) (predicted) | Pcf11_predicted  | 0.799 | 0.466 | 1.277 | 0.686 | 0.749 | 0.354 | 0.652 | 0.241 |
| 1376004_at   | BF285297  | Cleavage and polyadenylation specific factor 5                                  | Cpsf5            | 0.807 | 0.269 | 0.722 | 0.114 | 0.689 | 0.187 | 0.664 | 0.010 |
| 1397288_at   | BM390376  | Cleavage and polyadenylation specific factor 5                                  | Cpsf5            | 3.156 | 0.358 | 0.456 | 0.041 | 0.582 | 0.395 | 0.331 | 0.020 |

|              |           |                                                                             |                  |        |       |        |       |        |       |        |       |
|--------------|-----------|-----------------------------------------------------------------------------|------------------|--------|-------|--------|-------|--------|-------|--------|-------|
| 1398356_at   | BF420718  | cleavage and polyadenylation specific factor 5                              | Cpsf5            | 1.117  | 0.728 | 1.725  | 0.045 | 0.667  | 0.323 | 1.550  | 0.033 |
| 1376811_a_at | BE108383  | cleavage and polyadenylation specific factor 6, 68kDa (predicted)           | Cpsf6_predicted  | 0.678  | 0.086 | 2.640  | 0.001 | 0.891  | 0.390 | 2.140  | 0.008 |
| 1379729_at   | AI071906  | Cleavage and polyadenylation specific factor 6, 68kDa (predicted)           | Cpsf6_predicted  | 0.801  | 0.920 | 1.307  | 0.295 | 0.635  | 0.268 | 1.124  | 0.132 |
| 1374711_at   | BF283512  | cleavage and polyadenylation specificity factor 3                           | Cpsf3            | 0.642  | 0.484 | 0.589  | 0.128 | 0.406  | 0.019 | 1.002  | 0.913 |
| 1383115_at   | AW522557  | Cleavage stimulation factor, 3' pre-RNA subunit 2, tau (predicted)          | Cstf2t_predicted | 1.053  | 0.709 | 0.738  | 0.225 | 1.257  | 0.047 | 1.118  | 0.050 |
| 1389348_at   | BF282442  | cleavage stimulation factor, 3' pre-RNA, subunit 1                          | Cstf1            | 0.899  | 0.032 | 2.003  | 0.060 | 0.926  | 0.086 | 0.999  | 0.998 |
| 1384935_at   | AI070621  | Cleavage stimulation factor, 3' pre-RNA, subunit 3 (predicted)              | Cstf3_predicted  | 1.299  | 0.080 | 1.546  | 0.046 | 1.490  | 0.013 | 1.123  | 0.132 |
| 1396900_at   | BE106436  | Cleavage stimulation factor, 3' pre-RNA, subunit 3 (predicted)              | Cstf3_predicted  | 1.202  | 0.211 | 1.065  | 0.797 | 0.999  | 0.987 | 0.998  | 0.762 |
| 1371473_at   | BI284472  | cleft lip and palate associated transmembrane protein 1 (predicted)         | Clptm1_predicted | 0.587  | 0.849 | 0.731  | 0.194 | 0.687  | 0.618 | 0.851  | 0.118 |
| 1368099_at   | NM_053722 | CLIP associating protein 2                                                  | Clasp2           | 0.765  | 0.552 | 0.589  | 0.009 | 1.721  | 0.107 | 0.712  | 0.029 |
| 1392560_at   | BG153281  | Clone UI-R-FJ0-cpu-i-10-0-UI unknown mRNA                                   | ---              | 1.316  | 0.125 | 1.061  | 0.814 | 1.230  | 0.451 | 0.880  | 0.149 |
| 1371579_at   | AI012456  | Clone UI-R-FJ0-cpu-m-15-0-UI unknown mRNA                                   | ---              | 0.648  | 0.021 | 0.614  | 0.013 | 0.749  | 0.024 | 0.753  | 0.037 |
| 1367997_at   | NM_022947 | ClpB caseinolytic peptidase B homolog (E. coli)                             | Clpb             | 0.708  | 0.096 | 1.239  | 0.032 | 0.494  | 0.293 | 1.030  | 0.781 |
| 1367784_a_at | AF314657  | clusterin                                                                   | Clu              | 0.947  | 0.687 | 0.873  | 0.093 | 0.905  | 0.741 | 1.324  | 0.118 |
| 1388246_at   | AF314657  | clusterin                                                                   | Clu              | 0.892  | 0.785 | 0.862  | 0.030 | 0.940  | 0.539 | 1.358  | 0.237 |
| 1379829_at   | BF418799  | c-myc binding protein (predicted)                                           | Mycbp_predicted  | 0.790  | 0.341 | 0.449  | 0.035 | 1.080  | 0.864 | 0.618  | 0.029 |
| 1372132_at   | BI279729  | CNDP dipeptidase 2 (metallopeptidase M20 family)                            | Cndp2            | 0.855  | 0.095 | 1.052  | 0.150 | 1.508  | 0.022 | 1.709  | 0.031 |
| 1389368_at   | AW253242  | Cnksr family member 3                                                       | Cnksr3           | 21.848 | 0.006 | 17.039 | 0.009 | 21.041 | 0.004 | 14.097 | 0.002 |
| 1388596_at   | AI411057  | coactosin-like 1 (Dictyostelium) (predicted)                                | Cotl1_predicted  | 0.870  | 0.093 | 0.730  | 0.029 | 0.661  | 0.037 | 0.517  | 0.026 |
| 1369182_at   | NM_013057 | coagulation factor III                                                      | F3               | 8.658  | 0.005 | 5.663  | 0.000 | 1.017  | 0.916 | 2.923  | 0.001 |
| 1388377_at   | AW142717  | coatomer protein complex subunit alpha                                      | Copa             | 0.792  | 0.350 | 0.955  | 0.262 | 0.823  | 0.348 | 0.897  | 0.067 |
| 1367461_at   | NM_080781 | coatomer protein complex, subunit beta 1                                    | Copb1            | 0.779  | 0.241 | 0.914  | 0.787 | 0.800  | 0.099 | 0.923  | 0.969 |
| 1367454_at   | NM_021765 | coatomer protein complex, subunit beta 2 (beta prime)                       | Copb2            | 0.797  | 0.470 | 1.003  | 0.204 | 0.823  | 0.147 | 0.961  | 0.406 |
| 1371802_at   | AA891472  | coatomer protein complex, subunit epsilon (predicted)                       | Cope_predicted   | 0.598  | 0.137 | 0.725  | 0.065 | 0.622  | 0.031 | 0.652  | 0.069 |
| 1372464_at   | BE109050  | coatomer protein complex, subunit gamma                                     | Copg             | 0.631  | 0.316 | 0.859  | 0.135 | 0.731  | 0.129 | 0.785  | 0.020 |
| 1380430_at   | BF386177  | Coatomer protein complex, subunit gamma                                     | Copg             | 0.793  | 0.443 | 1.184  | 0.973 | 1.236  | 0.270 | 0.941  | 0.531 |
| 1371810_at   | BF284093  | Coatomer protein complex, subunit gamma                                     | Copg             | 0.685  | 0.940 | 0.386  | 0.000 | 0.700  | 0.309 | 0.405  | 0.008 |
| 1396754_at   | BF403379  | Coatomer protein complex, subunit zeta 1 (predicted)                        | Copz1_predicted  | 1.533  | 0.010 | 0.994  | 0.324 | 2.204  | 0.002 | 1.932  | 0.145 |
| 1375520_at   | AI007763  | Coatomer protein complex, subunit zeta 1 (predicted)                        | Copz1_predicted  | 0.699  | 0.097 | 0.783  | 0.066 | 0.728  | 0.185 | 0.831  | 0.102 |
| 1394565_at   | BF406339  | coatomer protein complex, subunit zeta 1 (predicted)                        | Copz1_predicted  | 0.451  | 0.534 | 0.865  | 0.411 | 0.310  | 0.092 | 0.553  | 0.017 |
| 1372305_at   | AA893634  | coatomer protein complex, subunit zeta 2 (predicted)                        | Copz2_predicted  | 0.552  | 0.002 | 0.954  | 0.999 | 0.618  | 0.021 | 0.921  | 0.798 |
| 1368585_at   | NM_017110 | cocaine and amphetamine regulated transcript                                | Cart             | 0.593  | 0.550 | 0.149  | 0.008 | 0.650  | 0.107 | 0.120  | 0.005 |
| 1373304_at   | BM392002  | Coenzyme A synthase                                                         | Coasy            | 0.459  | 0.033 | 0.394  | 0.007 | 0.413  | 0.001 | 0.559  | 0.007 |
| 1390281_a_at | AI407062  | coenzyme Q10 homolog A (yeast) (predicted)                                  | Coq10a_predicted | 0.389  | 0.020 | 0.519  | 0.001 | 0.589  | 0.097 | 0.479  | 0.019 |
| 1372753_at   | BI285643  | coenzyme Q6 homolog (yeast)                                                 | Coq6             | 0.689  | 0.395 | 2.154  | 0.003 | 0.318  | 0.027 | 1.321  | 0.089 |
| 1371909_at   | AA850406  | cofactor required for Sp1 transcriptional activation, subunit 3             | Crsp3            | 1.181  | 0.103 | 0.836  | 0.066 | 1.184  | 0.101 | 1.170  | 0.664 |
| 1398344_at   | BI287962  | cofactor required for Sp1 transcriptional activation, subunit 6             | Crsp6            | 2.999  | 0.006 | 1.562  | 0.049 | 3.771  | 0.000 | 1.084  | 0.339 |
| 1377263_at   | BF399036  | cofactor required for Sp1 transcriptional activation, subunit 9 (predicted) | Crsp9_predicted  | 0.771  | 0.299 | 0.935  | 0.974 | 1.284  | 0.021 | 1.201  | 0.236 |
| 1370184_at   | BG666614  | cofilin 1, non-muscle                                                       | Cfl1             | 1.016  | 0.416 | 1.558  | 0.028 | 0.813  | 0.268 | 1.171  | 0.073 |
| 1387871_at   | BM389673  | cofilin 1, non-muscle                                                       | Cfl1             | 1.089  | 0.472 | 1.130  | 0.062 | 0.853  | 0.222 | 1.098  | 0.005 |
| 1388928_at   | BF399310  | cofilin 2, muscle (predicted)                                               | Cfl2_predicted   | 0.877  | 0.320 | 0.989  | 0.833 | 0.640  | 0.210 | 0.819  | 0.386 |
| 1388483_at   | BI296011  | cofilin 2, muscle (predicted)                                               | Cfl2_predicted   | 1.048  | 0.861 | 2.050  | 0.007 | 0.977  | 0.329 | 1.832  | 0.017 |
| 1377254_a_at | BI295640  | Cohen syndrome homolog 1 (predicted)                                        | Cohh1_predicted  | 0.967  | 0.379 | 0.780  | 0.003 | 1.041  | 0.755 | 0.796  | 0.048 |
| 1375864_at   | BI274151  | coiled-coil and C2 domain containing 1B                                     | Ccdc21b          | 0.856  | 0.525 | 1.334  | 0.959 | 1.629  | 0.055 | 1.011  | 0.699 |
| 1375938_at   | BF411424  | coiled-coil domain containing 12 (predicted)                                | Ccdc12_predicted | 1.368  | 0.664 | 0.780  | 0.669 | 0.756  | 0.507 | 1.153  | 0.516 |
| 1373171_at   | BI294854  | coiled-coil domain containing 21                                            | Ccdc21           | 0.982  | 0.727 | 1.443  | 0.034 | 0.873  | 0.122 | 1.233  | 0.160 |
| 1372361_at   | AW529931  | coiled-coil domain containing 22 (predicted)                                | Ccdc22_predicted | 0.643  | 0.094 | 1.406  | 0.011 | 0.756  | 0.966 | 1.280  | 0.086 |
| 1378406_at   | BF394636  | Coiled-coil domain containing 39 (predicted)                                | Ccdc39_predicted | 0.692  | 0.713 | 0.916  | 0.975 | 0.865  | 0.820 | 1.158  | 0.534 |
| 1397358_at   | AI105407  | coiled-coil domain containing 39 (predicted)                                | Ccdc39_predicted | 1.007  | 0.974 | 0.998  | 0.674 | 0.999  | 0.314 | 1.001  | 0.093 |
| 1388736_at   | AI175383  | coiled-coil domain containing 43                                            | Ccdc43           | 0.776  | 0.719 | 1.311  | 0.042 | 0.988  | 0.488 | 1.325  | 0.055 |
| 1387944_at   | AF092207  | coiled-coil domain containing 5                                             | Ccdc5            | 1.150  | 0.592 | 0.743  | 0.025 | 1.891  | 0.082 | 0.535  | 0.014 |
| 1374005_at   | AI233232  | coiled-coil domain containing 51                                            | Ccdc51           | 0.949  | 0.147 | 0.882  | 0.131 | 0.997  | 0.659 | 0.903  | 0.161 |
| 1375634_at   | AA799472  | coiled-coil domain containing 53 (predicted)                                | Ccdc53_predicted | 0.518  | 0.374 | 0.372  | 0.005 | 0.345  | 0.004 | 0.406  | 0.015 |
| 1373475_at   | BM390469  | coiled-coil domain containing 58 (predicted)                                | Ccdc58_predicted | 0.705  | 0.345 | 2.678  | 0.007 | 0.992  | 0.932 | 2.100  | 0.025 |
| 1383271_at   | BM391624  | coiled-coil domain containing 59 (predicted)                                | Ccdc59_predicted | 1.004  | 0.987 | 1.190  | 0.149 | 1.010  | 0.960 | 1.270  | 0.653 |
| 1389126_at   | BG373580  | coiled-coil-helix-coiled-coil-helix domain containing 1 (predicted)         | Chchd1_predicted | 0.631  | 0.170 | 1.574  | 0.016 | 0.829  | 0.174 | 1.307  | 0.042 |
| 1371312_at   | AA799736  | coiled-coil-helix-coiled-coil-helix domain containing 2                     | Chchd2           | 0.881  | 0.441 | 1.369  | 0.008 | 0.894  | 0.482 | 1.022  | 0.907 |
| 1389291_at   | AA850511  | coiled-coil-helix-coiled-coil-helix domain containing 3 (predicted)         | Chchd3_predicted | 0.844  | 0.701 | 1.375  | 0.047 | 0.740  | 0.276 | 1.385  | 0.023 |
| 1373001_at   | AA817990  | coiled-coil-helix-coiled-coil-helix domain containing 4                     | Chchd4           | 1.198  | 0.546 | 3.988  | 0.003 | 0.895  | 0.455 | 2.643  | 0.003 |
| 1389625_at   | BI299402  | coiled-coil-helix-coiled-coil-helix domain containing 4                     | Chchd4           | 0.999  | 0.925 | 1.504  | 0.439 | 1.001  | 0.985 | 3.245  | 0.055 |
| 1372134_at   | AW918650  | coiled-coil-helix-coiled-coil-helix domain containing 6 (predicted)         | Chchd6_predicted | 0.583  | 0.912 | 1.661  | 0.009 | 0.441  | 0.050 | 1.653  | 0.063 |

|              |           |                                                                                                          |                                 |         |       |         |       |         |       |         |       |
|--------------|-----------|----------------------------------------------------------------------------------------------------------|---------------------------------|---------|-------|---------|-------|---------|-------|---------|-------|
| 1374731_at   | BI275929  | Coilin                                                                                                   | Coil                            | 3.699   | 0.003 | 0.919   | 0.704 | 4.911   | 0.000 | 1.504   | 0.030 |
| 1376302_at   | AA955175  | Coilin                                                                                                   | Coil                            | 0.447   | 0.027 | 0.316   | 0.007 | 0.904   | 0.064 | 0.325   | 0.020 |
| 1393523_at   | AI059075  | Coilin                                                                                                   | Coil                            | 1.702   | 0.144 | 1.158   | 0.709 | 0.511   | 0.433 | 1.802   | 0.358 |
| 1393623_at   | AI502247  | Coilin                                                                                                   | Coil                            | 0.926   | 0.575 | 0.416   | 0.000 | 0.718   | 0.425 | 0.438   | 0.000 |
| 1385904_at   | BG153342  | cold inducible RNA binding protein                                                                       | Cirbp                           | 0.379   | 0.001 | 0.223   | 0.005 | 0.423   | 0.004 | 0.197   | 0.024 |
| 1369083_at   | NM_031147 | cold inducible RNA binding protein                                                                       | Cirbp                           | 1.002   | 0.976 | 1.003   | 0.462 | 1.081   | 0.546 | 0.995   | 0.996 |
| 1370376_a_at | AA866458  | cold shock domain protein A                                                                              | Csda                            | 0.595   | 0.022 | 2.444   | 0.009 | 0.513   | 0.005 | 1.966   | 0.051 |
| 1387899_at   | U52102    | collapsin response mediator protein 1                                                                    | Crmp1                           | 1.363   | 0.134 | 0.892   | 0.242 | 0.952   | 0.383 | 0.616   | 0.049 |
| 1379631_at   | AI071665  | colony stimulating factor 1 (macrophage)                                                                 | Csf1                            | 12.692  | 0.003 | 3.316   | 0.087 | 4.153   | 0.063 | 1.328   | 0.224 |
| 1380582_at   | AW535553  | colony stimulating factor 1 (macrophage)                                                                 | Csf1                            | 1.004   | 0.893 | 0.999   | 0.997 | 1.002   | 0.979 | 1.001   | 0.999 |
| 1372801_at   | AI171256  | COMM domain containing 10                                                                                | Comm10                          | 0.554   | 0.293 | 1.312   | 0.062 | 0.493   | 0.064 | 1.358   | 0.077 |
| 1372148_at   | BI281210  | COMM domain containing 2 (predicted)                                                                     | Comm2_predicted                 | 0.584   | 0.131 | 1.122   | 0.017 | 0.516   | 0.060 | 1.082   | 0.141 |
| 1398894_at   | AI178763  | COMM domain containing 3                                                                                 | Comm3                           | 0.937   | 0.791 | 1.460   | 0.015 | 1.237   | 0.297 | 1.509   | 0.003 |
| 1372304_at   | BG378042  | COMM domain containing 4 (predicted)                                                                     | Comm4_predicted                 | 0.489   | 0.042 | 1.120   | 0.604 | 0.813   | 0.193 | 0.931   | 0.322 |
| 1370327_at   | AF290194  | COMM domain containing 5                                                                                 | Comm5                           | 0.924   | 0.814 | 1.200   | 0.112 | 0.794   | 0.322 | 1.075   | 0.738 |
| 1376493_at   | AI408996  | COMM domain containing 7                                                                                 | Comm7                           | 0.835   | 0.509 | 1.229   | 0.629 | 0.748   | 0.039 | 0.962   | 0.224 |
| 1373294_at   | AI234292  | COMM domain containing 8 (predicted)                                                                     | Comm8_predicted                 | 1.274   | 0.488 | 1.390   | 0.010 | 1.200   | 0.605 | 1.231   | 0.028 |
| 1398334_a_at | BF417278  | COMM domain containing 9                                                                                 | Comm9                           | 0.828   | 0.957 | 1.431   | 0.013 | 0.696   | 0.028 | 1.287   | 0.241 |
| 1367968_at   | NM_133622 | common salivary protein 1                                                                                | LOC171161                       | 1.007   | 0.993 | 0.897   | 0.496 | 1.071   | 0.864 | 1.007   | 0.516 |
| 1398784_at   | NM_019259 | complement component 1, q subcomponent binding protein                                                   | C1qbp                           | 0.702   | 0.724 | 2.549   | 0.002 | 0.614   | 0.022 | 2.060   | 0.003 |
| 1376652_at   | BF418957  | complement component 1, q subcomponent, alpha polypeptide                                                | C1qa                            | 0.670   | 0.034 | 0.561   | 0.052 | 0.545   | 0.074 | 0.798   | 0.383 |
| 1383241_at   | BI292425  | complement component 1, r subcomponent                                                                   | C1r                             | 126.901 | 0.000 | 146.089 | 0.000 | 129.915 | 0.000 | 153.914 | 0.000 |
| 1387893_at   | D88250    | complement component 1, s subcomponent /// similar to complement component 1, s subcomponent (predicted) | C1s ///<br>RGD1561715_predicted | 35.793  | 0.006 | 34.474  | 0.000 | 51.490  | 0.006 | 59.153  | 0.001 |
| 1383391_a_at | AI716125  | complement component 2                                                                                   | C2                              | 2.561   | 0.188 | 1.044   | 0.059 | 3.794   | 0.120 | 4.228   | 0.045 |
| 1368000_at   | NM_016994 | complement component 3                                                                                   | C3                              | 46.869  | 0.001 | 96.778  | 0.000 | 11.805  | 0.008 | 15.836  | 0.004 |
| 1369764_at   | NM_012516 | complement component 4 binding protein, alpha                                                            | C4bpa                           | 9.632   | 0.002 | 43.178  | 0.000 | 6.120   | 0.007 | 7.866   | 0.021 |
| 1368695_at   | NM_016995 | complement component 4 binding protein, beta                                                             | C4bpb                           | 17.716  | 0.015 | 15.080  | 0.001 | 10.190  | 0.002 | 1.325   | 0.243 |
| 1393123_at   | BM392153  | complement component 8, gamma polypeptide (predicted)                                                    | C8g_predicted                   | 0.704   | 0.263 | 0.398   | 0.013 | 1.108   | 0.657 | 0.606   | 0.083 |
| 1368741_at   | NM_057146 | complement component 9                                                                                   | C9                              | 1.966   | 0.060 | 3.894   | 0.028 | 1.215   | 0.305 | 1.008   | 0.971 |
| 1389470_at   | AI639117  | complement factor B                                                                                      | Cfb                             | 6.621   | 0.064 | 25.852  | 0.000 | 28.534  | 0.000 | 58.358  | 0.002 |
| 1387798_a_at | D42115    | complement receptor related protein                                                                      | Crry                            | 1.969   | 0.123 | 0.873   | 0.227 | 1.808   | 0.099 | 1.100   | 0.127 |
| 1394096_at   | AI555027  | complement receptor related protein                                                                      | Crry                            | 2.618   | 0.860 | 1.307   | 0.016 | 2.335   | 0.201 | 1.576   | 0.052 |
| 1385238_at   | AA926087  | Complexin 4 (predicted)                                                                                  | Cplx4_predicted                 | 0.600   | 0.159 | 0.621   | 0.014 | 0.671   | 0.171 | 0.618   | 0.015 |
| 1374301_at   | BI294695  | component of oligomeric golgi complex 1 (predicted)                                                      | Cog1_predicted                  | 0.536   | 0.411 | 0.664   | 0.011 | 0.668   | 0.022 | 0.696   | 0.159 |
| 1383206_at   | AA955098  | component of oligomeric golgi complex 3                                                                  | Cog3                            | 0.983   | 0.684 | 1.171   | 0.001 | 1.165   | 0.288 | 1.027   | 0.239 |
| 1396663_at   | BI300284  | Component of oligomeric golgi complex 4 (predicted)                                                      | Cog4_predicted                  | 1.413   | 0.231 | 1.623   | 0.229 | 1.151   | 0.862 | 0.944   | 0.798 |
| 1372819_at   | BM382870  | component of oligomeric golgi complex 4 (predicted)                                                      | Cog4_predicted                  | 0.903   | 0.818 | 1.002   | 0.768 | 0.920   | 0.354 | 0.893   | 0.709 |
| 1398471_at   | BF288063  | component of oligomeric golgi complex 6                                                                  | Cog6                            | 0.464   | 0.041 | 0.610   | 0.002 | 0.508   | 0.132 | 0.737   | 0.019 |
| 1379876_at   | AI407943  | component of oligomeric golgi complex 7                                                                  | Cog7                            | 0.590   | 0.522 | 0.601   | 0.002 | 0.563   | 0.069 | 0.494   | 0.128 |
| 1374045_at   | AI598851  | Component of oligomeric golgi complex 8 (predicted)                                                      | Cog8_predicted                  | 0.445   | 0.009 | 0.299   | 0.018 | 0.655   | 0.239 | 0.454   | 0.010 |
| 1390794_at   | BI289098  | component of oligomeric golgi complex 8 (predicted)                                                      | Cog8_predicted                  | 0.352   | 0.122 | 0.426   | 0.002 | 0.280   | 0.011 | 0.431   | 0.020 |
| 1395117_at   | BE106475  | congenital dyserythropoietic anemia, type I (predicted)                                                  | Cdan1_predicted                 | 1.000   | 0.939 | 0.994   | 0.972 | 0.983   | 0.878 | 1.000   | 0.998 |
| 1393740_at   | BI294230  | connector enhancer of kinase suppressor of Ras 1                                                         | Cnksr1                          | 3.104   | 0.007 | 3.704   | 0.002 | 7.163   | 0.001 | 7.416   | 0.001 |
| 1391455_at   | AI228280  | conserved nuclear protein Nhn1                                                                           | Nhn1                            | 0.996   | 0.302 | 0.947   | 0.256 | 0.783   | 0.267 | 0.502   | 0.071 |
| 1369351_at   | NM_019329 | contactin 3                                                                                              | Cntn3                           | 0.918   | 0.792 | 1.276   | 0.206 | 0.931   | 0.467 | 1.359   | 0.587 |
| 1373029_at   | AI169377  | COP9 (constitutive photomorphogenic) homolog, subunit 2 (Arabidopsis thaliana)                           | Cops2                           | 0.977   | 0.928 | 1.683   | 0.003 | 0.820   | 0.033 | 1.593   | 0.063 |
| 1398972_at   | AW916366  | COP9 (constitutive photomorphogenic) homolog, subunit 3 (Arabidopsis thaliana)                           | Cops3                           | 0.612   | 0.068 | 0.615   | 0.004 | 0.649   | 0.010 | 0.727   | 0.012 |
| 1395352_at   | BF282468  | COP9 (constitutive photomorphogenic) homolog, subunit 3 (Arabidopsis thaliana)                           | Cops3                           | 0.913   | 0.993 | 0.557   | 0.073 | 0.762   | 0.089 | 0.741   | 0.051 |
| 1371476_at   | AI411531  | COP9 (constitutive photomorphogenic) homolog, subunit 4 (Arabidopsis thaliana)                           | Cops4                           | 0.932   | 0.123 | 1.448   | 0.025 | 0.926   | 0.301 | 1.323   | 0.027 |
| 1395565_at   | BG669198  | COP9 (constitutive photomorphogenic) homolog, subunit 4 (Arabidopsis thaliana)                           | Cops4                           | 0.655   | 0.830 | 1.392   | 0.146 | 0.900   | 0.768 | 0.898   | 0.331 |
| 1395618_at   | BG673431  | COP9 (constitutive photomorphogenic) homolog, subunit 4 (Arabidopsis thaliana)                           | Cops4                           | 0.791   | 0.883 | 1.365   | 0.109 | 0.711   | 0.269 | 1.022   | 0.938 |
| 1372209_at   | AI105072  | COP9 (constitutive photomorphogenic) homolog, subunit 5 (Arabidopsis thaliana)                           | Cops5                           | 0.706   | 0.582 | 1.350   | 0.067 | 0.522   | 0.023 | 1.098   | 0.164 |
| 1399011_at   | AI409481  | COP9 (constitutive photomorphogenic) homolog, subunit 6 (Arabidopsis thaliana) (predicted)               | Cops6_predicted                 | 0.855   | 0.621 | 0.966   | 0.369 | 0.961   | 0.209 | 0.874   | 0.584 |
| 1374460_at   | BM386508  | COP9 (constitutive photomorphogenic) homolog, subunit 7a (Arabidopsis thaliana) (predicted)              | Cops7a_predicted                | 0.751   | 0.310 | 2.722   | 0.101 | 0.581   | 0.038 | 2.843   | 0.147 |
| 1389897_at   | BE110772  | COP9 (constitutive photomorphogenic) homolog, subunit 7a (Arabidopsis thaliana) (predicted)              | Cops7a_predicted                | 0.998   | 0.983 | 1.645   | 0.134 | 0.998   | 0.965 | 0.999   | 0.994 |
| 1398955_at   | BG378922  | COP9 (constitutive photomorphogenic) homolog, subunit 8 (Arabidopsis thaliana)                           | Cops8                           | 0.834   | 0.406 | 1.800   | 0.007 | 0.842   | 0.091 | 1.367   | 0.005 |
| 1378519_at   | BF398120  | Copine I (predicted)                                                                                     | Cpne1_predicted                 | 0.657   | 0.599 | 0.993   | 0.971 | 0.526   | 0.201 | 0.999   | 0.992 |
| 1392984_at   | BG671686  | copine III (predicted)                                                                                   | Cpne3_predicted                 | 1.180   | 0.238 | 2.147   | 0.384 | 2.633   | 0.101 | 1.897   | 0.638 |
| 1371993_at   | AI237636  | Copine III (predicted)                                                                                   | Cpne3_predicted                 | 1.782   | 0.247 | 0.695   | 0.004 | 2.600   | 0.004 | 0.991   | 0.573 |
| 1387038_at   | NM_053425 | copper chaperone for superoxide dismutase                                                                | Ccs                             | 0.348   | 0.080 | 0.756   | 0.051 | 0.254   | 0.003 | 0.718   | 0.065 |

|              |           |                                                                                                    |                   |       |       |       |       |        |       |       |       |
|--------------|-----------|----------------------------------------------------------------------------------------------------|-------------------|-------|-------|-------|-------|--------|-------|-------|-------|
| 1377998_at   | BI288705  | coproporphyrinogen oxidase                                                                         | Cpox              | 0.775 | 0.301 | 0.826 | 0.183 | 0.712  | 0.030 | 1.186 | 0.113 |
| 1387446_at   | NM_022950 | core 1 UDP-galactose:N-acetylglactosamine-alpha-R beta 1,3-galactosyltransferase                   | C1galt1           | 1.288 | 0.048 | 5.447 | 0.000 | 1.293  | 0.004 | 2.137 | 0.001 |
| 1399033_at   | AA945869  | core binding factor beta                                                                           | Cbfb              | 0.587 | 0.450 | 0.387 | 0.012 | 0.889  | 0.460 | 0.475 | 0.000 |
| 1395821_at   | BF524120  | core binding factor beta                                                                           | Cbfb              | 1.033 | 0.994 | 0.946 | 0.200 | 0.704  | 0.555 | 0.758 | 0.026 |
| 1390762_at   | BE103006  | core-binding factor, runt domain, alpha subunit 2; translocated to, 2 (predicted)                  | Cbfa2t2_predicted | 1.024 | 0.434 | 2.110 | 0.064 | 1.022  | 0.653 | 1.374 | 0.110 |
| 1379674_at   | BE115481  | core-binding factor, runt domain, alpha subunit 2; translocated to, 3 (predicted)                  | Cbfa2t3_predicted | 0.740 | 0.034 | 0.574 | 0.004 | 0.553  | 0.035 | 0.507 | 0.023 |
| 1388682_at   | AI598397  | cornichon homolog (Drosophila) (predicted)                                                         | Cnih_predicted    | 0.511 | 0.116 | 0.584 | 0.002 | 0.521  | 0.006 | 0.620 | 0.025 |
| 1373747_at   | BG381691  | cornichon homolog 2 (Drosophila)                                                                   | Cnih2             | 1.124 | 0.692 | 1.451 | 0.157 | 3.232  | 0.034 | 2.664 | 0.019 |
| 1388151_at   | AI008369  | coronin 7                                                                                          | Coro7             | 1.004 | 0.999 | 0.944 | 0.992 | 0.878  | 0.345 | 1.002 | 0.993 |
| 1379656_a_at | AW529016  | coronin, actin binding protein 2A                                                                  | Coro2a            | 1.311 | 0.962 | 1.920 | 0.057 | 0.912  | 0.579 | 1.188 | 0.298 |
| 1370390_at   | AF140359  | coronin, actin binding protein 6                                                                   | Coro6             | 0.997 | 0.877 | 0.851 | 0.351 | 1.100  | 0.193 | 0.638 | 0.369 |
| 1398769_at   | NM_019222 | coronin, actin-binding protein, 1B                                                                 | Coro1b            | 1.204 | 0.500 | 1.434 | 0.026 | 0.932  | 0.342 | 1.272 | 0.083 |
| 1370123_a_at | AF054618  | cortactin                                                                                          | Cctn              | 1.196 | 0.334 | 2.250 | 0.023 | 1.232  | 0.103 | 1.868 | 0.076 |
| 1371465_at   | BM390681  | cortactin                                                                                          | Cctn              | 0.712 | 0.548 | 0.501 | 0.006 | 0.664  | 0.036 | 0.584 | 0.008 |
| 1397902_at   | BF548780  | COX15 homolog, cytochrome c oxidase assembly protein (yeast)                                       | Cox15             | 1.350 | 0.510 | 0.678 | 0.078 | 1.225  | 0.222 | 0.670 | 0.212 |
| 1375922_at   | BI296988  | COX15 homolog, cytochrome c oxidase assembly protein (yeast)                                       | Cox15             | 0.941 | 0.919 | 0.720 | 0.008 | 0.920  | 0.614 | 0.793 | 0.015 |
| 1371658_at   | BM389065  | COX4 neighbor                                                                                      | Cox4nb            | 0.700 | 0.902 | 1.215 | 0.015 | 0.399  | 0.063 | 1.025 | 0.536 |
| 1374273_at   | BG665433  | Coxsackie virus and adenovirus receptor                                                            | Cxadr             | 0.471 | 0.006 | 0.360 | 0.002 | 0.639  | 0.059 | 0.448 | 0.018 |
| 1384816_at   | AI137518  | coxsackie virus and adenovirus receptor                                                            | Cxadr             | 0.729 | 0.360 | 0.739 | 0.049 | 1.028  | 0.725 | 0.906 | 0.293 |
| 1370264_at   | BI288556  | CPG2 protein                                                                                       | CPG2              | 0.689 | 0.156 | 0.262 | 0.007 | 0.872  | 0.484 | 0.485 | 0.007 |
| 1378886_x_at | BE102928  | CPG2 protein                                                                                       | CPG2              | 0.971 | 0.865 | 0.744 | 0.054 | 1.022  | 0.983 | 0.801 | 0.053 |
| 1398263_at   | NM_019355 | CPG2 protein                                                                                       | CPG2              | 1.313 | 0.988 | 1.542 | 0.452 | 1.006  | 0.925 | 1.644 | 0.173 |
| 1384718_at   | AI030198  | Craniofacial development protein 1                                                                 | Cfdp1             | 1.716 | 0.008 | 1.949 | 0.026 | 1.731  | 0.181 | 1.295 | 0.047 |
| 1373824_at   | AW433973  | craniofacial development protein 1                                                                 | Cfdp1             | 1.489 | 0.333 | 1.851 | 0.016 | 2.126  | 0.025 | 1.617 | 0.076 |
| 1395825_at   | BF284859  | Craniofacial development protein 1                                                                 | Cfdp1             | 0.843 | 0.969 | 1.905 | 0.736 | 0.817  | 0.489 | 1.234 | 0.835 |
| 1387830_at   | NM_017096 | C-reactive protein, pentraxin-related                                                              | Crp               | 1.001 | 0.545 | 0.456 | 0.046 | 1.003  | 0.643 | 0.457 | 0.046 |
| 1367740_at   | M14400    | creatine kinase, brain                                                                             | Ckb               | 0.195 | 0.045 | 0.123 | 0.001 | 0.146  | 0.013 | 0.090 | 0.006 |
| 1390566_a_at | BI301453  | creatine kinase, mitochondrial 1, ubiquitous                                                       | Ckmt1             | 6.595 | 0.001 | 6.072 | 0.002 | 5.459  | 0.005 | 3.816 | 0.003 |
| 1373828_at   | AI412614  | CREB regulated transcription coactivator 2                                                         | Crtc2             | 2.333 | 0.020 | 2.122 | 0.005 | 2.217  | 0.030 | 1.489 | 0.156 |
| 1387300_at   | NM_053797 | Crn, crooked neck-like 1 (Drosophila)                                                              | Crnk1l            | 1.496 | 0.121 | 0.812 | 0.152 | 1.527  | 0.195 | 0.999 | 0.992 |
| 1383648_x_at | BI283883  | crumbs homolog 3 (Drosophila)                                                                      | Crb3              | 2.252 | 0.001 | 1.847 | 0.006 | 1.959  | 0.004 | 1.636 | 0.002 |
| 1383647_a_at | BI283883  | crumbs homolog 3 (Drosophila)                                                                      | Crb3              | 1.830 | 0.038 | 2.031 | 0.016 | 1.944  | 0.003 | 1.611 | 0.001 |
| 1384397_x_at | AI072527  | crumbs homolog 3 (Drosophila)                                                                      | Crb3              | 1.731 | 0.085 | 1.619 | 0.132 | 1.007  | 0.533 | 1.631 | 0.154 |
| 1392640_at   | AI412155  | cryptochrome 1 (photolyase-like)                                                                   | Cry1              | 1.830 | 0.117 | 2.383 | 0.016 | 1.265  | 0.783 | 2.411 | 0.038 |
| 1388385_at   | BG371710  | crystallin, beta A2                                                                                | Cryba2            | 0.358 | 0.012 | 0.209 | 0.001 | 0.345  | 0.002 | 0.283 | 0.008 |
| 1382349_at   | AI408238  | crystallin, gamma S                                                                                | Crygs             | 0.573 | 0.174 | 0.749 | 0.765 | 0.855  | 0.427 | 0.774 | 0.686 |
| 1376051_at   | BI293393  | crystallin, lamda 1                                                                                | Cryl1             | 0.758 | 0.062 | 0.610 | 0.011 | 0.740  | 0.061 | 0.528 | 0.014 |
| 1374628_at   | AI232098  | crystallin, zeta                                                                                   | Cryz              | 1.090 | 0.729 | 0.994 | 0.970 | 1.002  | 0.963 | 1.025 | 0.808 |
| 1392506_at   | AI575645  | crystallin, zeta (quinone reductase)-like 1                                                        | Cryz1l            | 0.546 | 0.003 | 0.788 | 0.171 | 0.823  | 0.258 | 0.854 | 0.052 |
| 1371592_at   | AI600236  | c-src tyrosine kinase                                                                              | Csk               | 1.170 | 0.091 | 1.026 | 0.906 | 0.728  | 0.044 | 0.764 | 0.128 |
| 1390535_at   | BE098745  | CTD (carboxy-terminal domain, RNA polymerase II, polypeptide A) phosphatase, subunit 1 (predicted) | Ctdp1_predicted   | 1.620 | 0.094 | 2.553 | 0.001 | 1.220  | 0.841 | 1.674 | 0.043 |
| 1388533_at   | BM390302  | CTD (carboxy-terminal domain, RNA polymerase II, polypeptide A) small phosphatase 1                | Ctdsp1            | 0.616 | 0.446 | 0.607 | 0.005 | 0.497  | 0.010 | 0.515 | 0.004 |
| 1391635_at   | AI044500  | CTD (carboxy-terminal domain, RNA polymerase II, polypeptide A) small phosphatase-like (predicted) | Ctdspl_predicted  | 0.972 | 0.937 | 0.623 | 0.045 | 0.659  | 0.345 | 0.764 | 0.281 |
| 1387978_at   | U49057    | CTD-binding SR-like protein rA9                                                                    | LOC245925         | 0.675 | 0.021 | 0.763 | 0.086 | 0.698  | 0.167 | 0.998 | 0.993 |
| 1397102_at   | AI502196  | CTD-binding SR-like protein rA9                                                                    | LOC245925         | 1.109 | 0.424 | 1.230 | 0.057 | 1.479  | 0.380 | 0.954 | 0.089 |
| 1367984_at   | NM_019384 | CTD-binding SR-like rA1                                                                            | LOC56081          | 0.847 | 0.112 | 0.731 | 0.600 | 0.737  | 0.009 | 1.036 | 0.704 |
| 1370029_at   | NM_019201 | C-terminal binding protein 1                                                                       | Ctbp1             | 0.949 | 0.517 | 1.123 | 0.412 | 0.865  | 0.426 | 1.008 | 0.927 |
| 1387113_at   | NM_053335 | C-terminal binding protein 2                                                                       | Ctbp2             | 2.370 | 0.007 | 1.540 | 0.066 | 2.398  | 0.006 | 1.343 | 0.612 |
| 1392299_at   | BE113875  | C-terminal PDZ domain ligand of neuronal nitric oxide synthase                                     | Capon             | 2.152 | 0.162 | 0.861 | 0.035 | 1.152  | 0.882 | 0.908 | 0.054 |
| 1379450_at   | BM383195  | CTTNBP2 N-terminal like (predicted)                                                                | Ctnb2n1_predicted | 7.381 | 0.007 | 1.940 | 0.045 | 13.920 | 0.000 | 5.801 | 0.022 |
| 1382873_at   | BF414250  | CTTNBP2 N-terminal like (predicted)                                                                | Ctnb2n1_predicted | 1.191 | 0.521 | 1.641 | 0.118 | 2.131  | 0.104 | 2.953 | 0.061 |
| 1390782_at   | BI295930  | C-type lectin domain family 14, member a                                                           | Clec14a           | 1.016 | 0.362 | 0.965 | 0.297 | 0.940  | 0.792 | 1.009 | 0.978 |
| 1376368_at   | BE095878  | CUE domain containing 2 (predicted)                                                                | Cuedc2_predicted  | 0.569 | 0.048 | 0.996 | 0.760 | 0.564  | 0.032 | 0.975 | 0.959 |
| 1393029_at   | BF410771  | CUG triplet repeat, RNA binding protein 1                                                          | Cugbp1            | 1.151 | 0.111 | 0.951 | 0.904 | 0.978  | 0.618 | 0.960 | 0.338 |
| 1393568_at   | BF404793  | CUG triplet repeat, RNA binding protein 1                                                          | Cugbp1            | 1.086 | 0.383 | 1.372 | 0.029 | 1.250  | 0.146 | 1.063 | 0.333 |
| 1388704_at   | AA892394  | CUG triplet repeat, RNA binding protein 1                                                          | Cugbp1            | 1.024 | 0.604 | 0.516 | 0.013 | 0.858  | 0.310 | 0.682 | 0.151 |
| 1393257_at   | BI293905  | CUG triplet repeat, RNA binding protein 1                                                          | Cugbp1            | 0.934 | 0.825 | 1.125 | 0.158 | 0.887  | 0.416 | 1.171 | 0.338 |
| 1371900_at   | BF408840  | CUG triplet repeat, RNA binding protein 1                                                          | Cugbp1            | 1.138 | 0.963 | 0.571 | 0.049 | 0.968  | 0.402 | 0.666 | 0.111 |
| 1397217_at   | BF408757  | CUG triplet repeat, RNA binding protein 2                                                          | Cugbp2            | 1.564 | 0.151 | 1.289 | 0.256 | 1.647  | 0.144 | 1.298 | 0.246 |
| 1397673_at   | AW523660  | CUG triplet repeat, RNA binding protein 2                                                          | Cugbp2            | 1.014 | 0.566 | 0.797 | 0.080 | 1.725  | 0.050 | 1.099 | 0.459 |
| 1396654_at   | BF403645  | CUG triplet repeat, RNA binding protein 2                                                          | Cugbp2            | 0.599 | 0.630 | 1.746 | 1.000 | 0.375  | 0.438 | 1.147 | 0.979 |



|              |           |                                                                           |                   |       |       |        |       |       |       |        |       |
|--------------|-----------|---------------------------------------------------------------------------|-------------------|-------|-------|--------|-------|-------|-------|--------|-------|
| 1380670_at   | BE095613  | CUG triplet repeat, RNA binding protein 2                                 | Cugbp2            | 1.089 | 0.848 | 0.608  | 0.148 | 2.846 | 0.004 | 0.954  | 0.831 |
| 1388195_at   | AW140475  | CUG triplet repeat, RNA binding protein 2                                 | Cugbp2            | 1.122 | 0.851 | 0.743  | 0.061 | 1.017 | 0.890 | 0.860  | 0.087 |
| 1388855_at   | BI284428  | cullin 1 (predicted)                                                      | Cul1_predicted    | 1.190 | 0.185 | 1.571  | 0.012 | 1.351 | 0.014 | 1.601  | 0.007 |
| 1383106_at   | BI295890  | cullin 2 (predicted)                                                      | Cul2_predicted    | 1.452 | 0.076 | 1.333  | 0.108 | 1.665 | 0.015 | 1.328  | 0.121 |
| 1378127_at   | BF420355  | cullin 2 (predicted)                                                      | Cul2_predicted    | 1.647 | 0.210 | 1.283  | 0.965 | 1.366 | 0.074 | 0.854  | 0.363 |
| 1393343_at   | BE115856  | cullin 3 (predicted)                                                      | Cul3_predicted    | 0.501 | 0.002 | 0.599  | 0.107 | 0.413 | 0.039 | 0.814  | 0.130 |
| 1399132_at   | BI285751  | cullin 3 (predicted)                                                      | Cul3_predicted    | 0.652 | 0.121 | 0.809  | 0.011 | 0.705 | 0.068 | 0.904  | 0.028 |
| 1369068_at   | NM_022683 | cullin 5                                                                  | Cul5              | 1.165 | 0.044 | 1.983  | 0.084 | 1.002 | 0.520 | 1.005  | 0.990 |
| 1393306_at   | BF551475  | Cullin 5                                                                  | Cul5              | 1.036 | 0.425 | 0.766  | 0.143 | 0.884 | 0.755 | 0.756  | 0.137 |
| 1367972_at   | NM_054004 | cullin associated and neddylation disassociated 1                         | Cand1             | 0.691 | 0.152 | 1.178  | 0.062 | 0.635 | 0.008 | 1.190  | 0.078 |
| 1370421_a_at | AB029342  | cullin-associated and neddylation-dissociated 2 (putative)                | Cand2             | 0.550 | 0.014 | 0.566  | 0.015 | 0.507 | 0.050 | 0.641  | 0.108 |
| 1377406_at   | BI275251  | Cullin-associated and neddylation-dissociated 2 (putative)                | Cand2             | 0.874 | 0.586 | 0.660  | 0.011 | 0.740 | 0.061 | 0.661  | 0.022 |
| 1385024_at   | AW535558  | cutC copper transporter homolog (E.coli) (predicted)                      | Cutc_predicted    | 0.395 | 0.014 | 0.798  | 0.132 | 0.429 | 0.010 | 0.730  | 0.093 |
| 1385888_at   | AA963272  | Cut-like 1 (Drosophila)                                                   | Cutl1             | 1.005 | 0.371 | 0.620  | 0.032 | 1.561 | 0.068 | 0.753  | 0.006 |
| 1385887_at   | BE107316  | Cut-like 1 (Drosophila)                                                   | Cutl1             | 0.940 | 0.634 | 0.814  | 0.299 | 1.359 | 0.116 | 0.777  | 0.011 |
| 1371024_at   | AW527515  | cut-like 1 (Drosophila)                                                   | Cutl1             | 1.028 | 0.869 | 1.002  | 0.789 | 1.004 | 0.981 | 0.973  | 0.215 |
| 1391079_at   | BI295875  | Cut-like 1 (Drosophila)                                                   | Cutl1             | 0.995 | 0.909 | 0.956  | 0.602 | 1.005 | 0.969 | 0.954  | 0.614 |
| 1372138_at   | BM390477  | Cut-like 1 (Drosophila)                                                   | Cutl1             | 0.911 | 0.930 | 0.720  | 0.635 | 1.552 | 0.265 | 0.848  | 0.533 |
| 1395105_at   | AW527267  | CWF19-like 2, cell cycle control (S. pombe) (predicted)                   | Cwf19l2_predicted | 1.222 | 0.140 | 1.239  | 0.033 | 1.075 | 0.233 | 1.038  | 0.652 |
| 1388875_at   | AI410353  | CXXC finger 1 (PHD domain)                                                | Cxxc1             | 1.230 | 0.986 | 2.292  | 0.013 | 0.939 | 0.798 | 2.233  | 0.001 |
| 1368801_at   | NM_053342 | CXXC finger 4                                                             | Cxxc4             | 0.416 | 0.008 | 0.193  | 0.001 | 0.485 | 0.011 | 0.226  | 0.011 |
| 1394284_at   | AW143904  | CXXC finger 4                                                             | Cxxc4             | 0.254 | 0.057 | 0.371  | 0.106 | 0.950 | 0.545 | 1.089  | 0.509 |
| 1371629_at   | AI105444  | CXXC finger 5                                                             | Cxxc5             | 1.284 | 0.178 | 1.367  | 0.168 | 1.362 | 0.196 | 1.134  | 0.140 |
| 1375231_a_at | BI281838  | CXXC finger 5                                                             | Cxxc5             | 1.004 | 0.375 | 1.537  | 0.006 | 1.385 | 0.158 | 1.409  | 0.084 |
| 1387897_at   | L16532    | cyclic nucleotide phosphodiesterase 1                                     | Cnp1              | 3.562 | 0.076 | 1.838  | 0.014 | 3.600 | 0.003 | 2.496  | 0.008 |
| 1370693_a_at | M18630    | cyclic nucleotide phosphodiesterase 1                                     | Cnp1              | 2.529 | 0.091 | 1.629  | 0.173 | 4.332 | 0.054 | 1.934  | 0.012 |
| 1389566_at   | AW253821  | cyclin B2                                                                 | Ccnb2             | 0.640 | 0.394 | 0.658  | 0.246 | 0.605 | 0.170 | 0.673  | 0.203 |
| 1390343_at   | AA998893  | Cyclin C                                                                  | Ccnc              | 0.611 | 0.295 | 0.476  | 0.001 | 0.591 | 0.043 | 0.678  | 0.000 |
| 1375666_at   | BE098802  | cyclin D binding myb-like transcription factor 1                          | Dmtf1             | 1.252 | 0.067 | 1.381  | 0.002 | 1.281 | 0.222 | 1.168  | 0.036 |
| 1383075_at   | BI295861  | cyclin D1                                                                 | Ccnd1             | 0.665 | 0.108 | 0.541  | 0.052 | 0.757 | 0.116 | 0.650  | 0.017 |
| 1371643_at   | AW143798  | cyclin D1                                                                 | Ccnd1             | 0.478 | 0.118 | 0.428  | 0.005 | 0.689 | 0.163 | 0.548  | 0.012 |
| 1371150_at   | X75207    | cyclin D1                                                                 | Ccnd1             | 0.858 | 0.983 | 1.048  | 0.833 | 0.831 | 0.866 | 0.999  | 0.782 |
| 1370810_at   | L09752    | cyclin D2                                                                 | Ccnd2             | 1.151 | 0.640 | 0.638  | 0.069 | 1.223 | 0.280 | 0.534  | 0.067 |
| 1369935_at   | NM_012766 | cyclin D3                                                                 | Ccnd3             | 0.381 | 0.088 | 0.619  | 0.019 | 0.516 | 0.000 | 0.616  | 0.021 |
| 1398340_at   | AI317832  | cyclin D-type binding-protein 1                                           | Ccndbp1           | 0.588 | 0.092 | 0.320  | 0.000 | 0.667 | 0.024 | 0.375  | 0.000 |
| 1391681_at   | AI409729  | Cyclin E2 (predicted)                                                     | Ccne2_predicted   | 1.354 | 0.600 | 0.947  | 0.959 | 1.170 | 0.305 | 0.689  | 0.722 |
| 1367875_at   | NM_031030 | cyclin G associated kinase                                                | Gak               | 0.999 | 0.983 | 1.342  | 0.006 | 0.858 | 0.136 | 1.365  | 0.055 |
| 1367764_at   | NM_012923 | cyclin G1                                                                 | Ccng1             | 0.822 | 0.881 | 1.370  | 0.012 | 0.782 | 0.861 | 1.611  | 0.025 |
| 1371953_at   | AI408309  | Cyclin G2 (predicted)                                                     | Ccng2_predicted   | 4.589 | 0.012 | 2.448  | 0.003 | 4.508 | 0.007 | 2.539  | 0.004 |
| 1368083_at   | NM_052981 | cyclin H                                                                  | Ccnh              | 0.922 | 0.752 | 1.480  | 0.089 | 1.036 | 0.323 | 1.289  | 0.119 |
| 1388370_at   | AA945706  | cyclin I (predicted)                                                      | Ccni_predicted    | 0.932 | 0.146 | 0.741  | 0.000 | 1.049 | 0.917 | 0.877  | 0.015 |
| 1392937_at   | BF557327  | cyclin I (predicted)                                                      | Ccni_predicted    | 0.911 | 0.870 | 0.628  | 0.358 | 0.908 | 0.564 | 0.816  | 0.430 |
| 1368050_at   | NM_053662 | cyclin L1                                                                 | Ccnl1             | 1.611 | 0.029 | 2.757  | 0.004 | 1.955 | 0.005 | 1.798  | 0.011 |
| 1382164_at   | AI236548  | Cyclin L2                                                                 | Ccnl2             | 1.041 | 0.652 | 1.850  | 0.122 | 1.030 | 0.179 | 1.463  | 0.092 |
| 1381294_at   | BF409260  | Cyclin M1 (predicted)                                                     | Cnnm1_predicted   | 1.269 | 0.082 | 0.971  | 0.908 | 0.835 | 0.253 | 0.749  | 0.617 |
| 1376142_at   | BE120410  | Cyclin M1 (predicted)                                                     | Cnnm1_predicted   | 1.001 | 0.988 | 0.849  | 0.103 | 1.062 | 0.556 | 0.855  | 0.108 |
| 1382269_at   | BM388183  | cyclin M2                                                                 | Cnnm2             | 0.520 | 0.003 | 1.586  | 0.087 | 0.779 | 0.321 | 1.378  | 0.033 |
| 1380970_at   | BI281399  | Cyclin M2                                                                 | Cnnm2             | 1.003 | 0.520 | 1.166  | 0.339 | 1.000 | 0.996 | 0.992  | 0.989 |
| 1391270_at   | BE112177  | Cyclin M3 (predicted)                                                     | Cnnm3_predicted   | 0.372 | 0.012 | 0.192  | 0.004 | 0.335 | 0.000 | 0.374  | 0.006 |
| 1382124_at   | BE105042  | Cyclin M3 (predicted)                                                     | Cnnm3_predicted   | 0.797 | 0.117 | 0.707  | 0.362 | 0.617 | 0.018 | 0.861  | 0.434 |
| 1369950_at   | NM_053593 | cyclin-dependent kinase 4                                                 | Cdk4              | 0.712 | 0.204 | 1.056  | 0.554 | 0.486 | 0.005 | 0.807  | 0.054 |
| 1368088_at   | NM_080885 | cyclin-dependent kinase 5                                                 | Cdk5              | 0.534 | 0.080 | 0.167  | 0.025 | 0.263 | 0.010 | 0.419  | 0.004 |
| 1397324_at   | BE117105  | Cyclin-dependent kinase 7 (homolog of Xenopus MO15 cdk-activating kinase) | Cdk7              | 1.848 | 0.108 | 1.043  | 0.907 | 1.709 | 0.381 | 0.759  | 0.330 |
| 1388171_at   | AW916118  | cyclin-dependent kinase 7 (homolog of Xenopus MO15 cdk-activating kinase) | Cdk7              | 0.484 | 0.117 | 0.930  | 0.567 | 0.606 | 0.010 | 1.171  | 0.580 |
| 1372759_at   | H31766    | cyclin-dependent kinase 9 (CDC2-related kinase)                           | Cdk9              | 0.922 | 0.694 | 1.627  | 0.006 | 0.875 | 0.553 | 1.254  | 0.045 |
| 1388674_at   | AI010427  | cyclin-dependent kinase inhibitor 1A                                      | Cdkn1a            | 2.989 | 0.037 | 20.309 | 0.002 | 3.698 | 0.004 | 21.063 | 0.001 |
| 1373812_at   | BE110915  | cyclin-dependent kinase inhibitor 1B                                      | Cdkn1b            | 1.144 | 0.103 | 0.797  | 0.007 | 1.298 | 0.239 | 0.765  | 0.030 |
| 1369192_at   | NM_031762 | cyclin-dependent kinase inhibitor 1B                                      | Cdkn1b            | 0.891 | 0.553 | 0.879  | 0.293 | 0.846 | 0.597 | 0.661  | 0.187 |
| 1372299_at   | AI013919  | cyclin-dependent kinase inhibitor 1C (P57)                                | Cdkn1c            | 1.129 | 0.631 | 1.569  | 0.104 | 1.036 | 0.884 | 1.069  | 0.771 |
| 1370054_at   | NM_131902 | cyclin-dependent kinase inhibitor 2C (p18, inhibits CDK4)                 | Cdkn2c            | 0.578 | 0.028 | 0.325  | 0.003 | 0.491 | 0.010 | 0.449  | 0.018 |
| 1370226_at   | AI409867  | cystatin B                                                                | Cstb              | 1.160 | 0.332 | 1.790  | 0.040 | 0.739 | 0.514 | 1.930  | 0.003 |

|              |           |                                                                                           |                   |       |       |       |       |        |       |        |       |
|--------------|-----------|-------------------------------------------------------------------------------------------|-------------------|-------|-------|-------|-------|--------|-------|--------|-------|
| 1370855_at   | BG666933  | cystatin C                                                                                | Cst3              | 0.876 | 0.921 | 0.627 | 0.017 | 0.858  | 0.377 | 0.712  | 0.008 |
| 1368162_at   | NM_133566 | cystatin E/M                                                                              | Cst6              | 0.796 | 0.870 | 0.805 | 0.073 | 0.644  | 0.103 | 0.567  | 0.249 |
| 1370057_at   | NM_017148 | cysteine and glycine-rich protein 1                                                       | Csrp1             | 1.829 | 0.494 | 4.103 | 0.022 | 1.499  | 0.261 | 2.371  | 0.044 |
| 1370282_at   | U44948    | cysteine and glycine-rich protein 2                                                       | Csrp2             | 0.178 | 0.047 | 0.094 | 0.004 | 0.124  | 0.001 | 0.121  | 0.023 |
| 1376797_at   | AA997458  | cysteine and glycine-rich protein 2 binding protein (predicted)                           | Csrp2bp_predicted | 0.675 | 0.237 | 1.832 | 0.039 | 0.776  | 0.900 | 1.805  | 0.028 |
| 1377738_a_at | AI176855  | cysteine and histidine rich 1                                                             | Cyhr1             | 0.651 | 0.131 | 0.305 | 0.013 | 0.720  | 0.187 | 0.465  | 0.048 |
| 1383160_at   | AA892238  | cysteine and histidine-rich domain (CHORD)-containing, zinc-binding protein 1 (predicted) | Chordc1_predicted | 1.070 | 0.670 | 1.866 | 0.024 | 1.033  | 0.306 | 1.836  | 0.023 |
| 1367755_at   | NM_052809 | cysteine dioxygenase 1, cytosolic                                                         | Cdo1              | 0.126 | 0.003 | 0.338 | 0.002 | 0.120  | 0.013 | 0.313  | 0.001 |
| 1368290_at   | NM_031327 | cysteine rich protein 61                                                                  | Cyr61             | 1.004 | 0.996 | 0.987 | 0.970 | 1.005  | 0.996 | 0.995  | 0.989 |
| 1398286_at   | M64755    | cysteine sulfenic acid decarboxylase                                                      | Csad              | 1.774 | 0.967 | 0.877 | 0.991 | 1.000  | 1.000 | 0.811  | 0.892 |
| 1382037_at   | AI600057  | cysteine-rich motor neuron 1 (predicted)                                                  | Crim1_predicted   | 1.037 | 0.551 | 1.531 | 0.045 | 1.204  | 0.220 | 1.290  | 0.142 |
| 1368633_at   | NM_022859 | cysteine-rich secretory protein 1                                                         | Crisp1            | 1.844 | 0.028 | 1.010 | 0.965 | 1.090  | 0.662 | 0.970  | 0.949 |
| 1388594_at   | BG371453  | cysteine-rich with EGF-like domains 1                                                     | Creld1            | 0.430 | 0.008 | 0.940 | 0.197 | 0.541  | 0.020 | 0.807  | 0.030 |
| 1377016_at   | BE106888  | cysteine-rich with EGF-like domains 2                                                     | Creld2            | 0.874 | 0.927 | 2.140 | 0.049 | 1.306  | 0.112 | 1.989  | 0.050 |
| 1374034_at   | BG379410  | cysteinyl-tRNA synthetase (predicted)                                                     | Cars_predicted    | 1.192 | 0.123 | 1.104 | 0.885 | 1.356  | 0.178 | 0.741  | 0.878 |
| 1376754_at   | AI176610  | cysteinyl-tRNA synthetase (predicted)                                                     | Cars_predicted    | 1.392 | 0.485 | 1.350 | 0.053 | 1.464  | 0.301 | 1.284  | 0.554 |
| 1394970_at   | BI279660  | cysteinyl-tRNA synthetase (predicted)                                                     | Cars_predicted    | 1.104 | 0.638 | 1.005 | 0.727 | 1.124  | 0.197 | 0.956  | 0.772 |
| 1391572_at   | BE109168  | cysteinyl-tRNA synthetase (predicted)                                                     | Cars_predicted    | 1.006 | 0.968 | 0.878 | 0.818 | 0.999  | 0.232 | 0.861  | 0.626 |
| 1390692_at   | BE105721  | cytidine 5'-triphosphate synthase (predicted)                                             | Ctps_predicted    | 0.700 | 0.201 | 1.458 | 0.036 | 0.430  | 0.004 | 1.295  | 0.055 |
| 1394431_at   | AI704014  | cytidine and dCMP deaminase domain containing 1                                           | Cdadc1            | 1.008 | 0.243 | 0.589 | 0.004 | 0.851  | 0.875 | 0.661  | 0.004 |
| 1385329_at   | BF401322  | cytidine and dCMP deaminase domain containing 1                                           | Cdadc1            | 1.010 | 0.727 | 0.601 | 0.052 | 1.318  | 0.054 | 1.108  | 0.422 |
| 1371804_at   | AI172266  | cytidine and dCMP deaminase domain containing 1                                           | Cdadc1            | 0.897 | 0.954 | 1.970 | 0.012 | 1.091  | 0.759 | 1.995  | 0.027 |
| 1373650_at   | AI172078  | cytidine monophospho-N-acetylneuraminic acid synthetase                                   | Cmas              | 0.518 | 0.081 | 0.754 | 0.001 | 0.411  | 0.011 | 0.643  | 0.022 |
| 1389135_at   | AW140637  | cytidine triphosphate synthase II                                                         | Ctps2             | 1.185 | 0.752 | 1.615 | 0.008 | 1.071  | 0.337 | 2.320  | 0.011 |
| 1373365_at   | AI100861  | cytidylate kinase                                                                         | Cmpk              | 1.087 | 0.474 | 0.805 | 0.117 | 1.210  | 0.922 | 0.830  | 0.034 |
| 1372846_at   | AI179227  | cytochrome b, ascorbate dependent 3                                                       | Cybasc3           | 0.857 | 0.490 | 0.971 | 0.741 | 1.617  | 0.634 | 1.078  | 0.126 |
| 1379344_at   | AI176057  | Cytochrome b-245, beta polypeptide                                                        | Cybb              | 1.822 | 0.023 | 5.080 | 0.004 | 1.588  | 0.027 | 2.529  | 0.009 |
| 1386904_a_at | AF007107  | cytochrome b-5                                                                            | Cyb5              | 0.374 | 0.236 | 0.405 | 0.019 | 0.466  | 0.031 | 0.575  | 0.039 |
| 1370808_at   | J03867    | cytochrome b5 reductase 3                                                                 | Cyb5r3            | 0.228 | 0.007 | 0.105 | 0.002 | 0.181  | 0.013 | 0.058  | 0.016 |
| 1370827_at   | AF307840  | cytochrome b5 reductase 4                                                                 | Cyb5r4            | 1.130 | 0.184 | 1.617 | 0.001 | 1.105  | 0.224 | 1.551  | 0.018 |
| 1370005_at   | NM_030586 | cytochrome b5 type B                                                                      | Cyb5b             | 0.870 | 0.037 | 2.378 | 0.124 | 0.919  | 0.111 | 1.527  | 0.110 |
| 1398383_at   | BI282164  | cytochrome b-561 (predicted)                                                              | Cyb561_predicted  | 0.652 | 0.298 | 0.507 | 0.028 | 0.491  | 0.011 | 0.536  | 0.047 |
| 1399111_at   | AI102191  | cytochrome b-561 domain containing 2                                                      | Cyb561d2          | 0.409 | 0.112 | 0.892 | 0.234 | 0.458  | 0.016 | 0.625  | 0.345 |
| 1367607_at   | NM_017202 | cytochrome c oxidase subunit IV isoform 1                                                 | Cox4i1            | 0.977 | 0.887 | 1.070 | 0.087 | 0.802  | 0.018 | 0.834  | 0.798 |
| 1386887_at   | NM_053586 | cytochrome c oxidase subunit Vb                                                           | Cox5b             | 0.798 | 0.701 | 0.968 | 0.344 | 0.648  | 0.025 | 1.017  | 0.429 |
| 1371337_at   | BG378939  | cytochrome c oxidase subunit VIIa polypeptide 2 like (predicted)                          | Cox7a2l_predicted | 0.986 | 0.931 | 1.615 | 0.010 | 0.804  | 0.013 | 1.185  | 0.119 |
| 1371387_at   | AA866477  | cytochrome c oxidase subunit VIb                                                          | Cox7b             | 0.740 | 0.715 | 0.849 | 0.177 | 0.961  | 0.256 | 0.927  | 0.247 |
| 1370888_at   | X15030    | cytochrome c oxidase, subunit Va                                                          | Cox5a             | 0.895 | 0.893 | 1.371 | 0.061 | 0.807  | 0.380 | 1.310  | 0.034 |
| 1370861_at   | BI282326  | cytochrome c oxidase, subunit VIa, polypeptide 1                                          | Cox6a1            | 0.886 | 0.984 | 0.999 | 0.800 | 0.651  | 0.053 | 0.987  | 0.963 |
| 1367757_at   | NM_019360 | cytochrome c oxidase, subunit VIc                                                         | Cox6c             | 0.768 | 0.840 | 0.905 | 0.189 | 0.575  | 0.064 | 0.781  | 0.190 |
| 1367629_at   | NM_022503 | cytochrome c oxidase, subunit VIIa 2                                                      | Cox7a2            | 0.970 | 0.882 | 0.783 | 0.119 | 0.926  | 0.444 | 0.826  | 0.181 |
| 1388113_at   | BG673321  | cytochrome c oxidase, subunit VIIa                                                        | Cox8a             | 0.854 | 0.684 | 0.834 | 0.062 | 0.786  | 0.144 | 0.990  | 0.145 |
| 1394658_at   | AI176811  | Cytochrome c oxidase, subunit XVII assembly protein homolog (yeast)                       | Cox17             | 0.884 | 0.343 | 1.209 | 0.881 | 1.005  | 0.673 | 1.016  | 0.880 |
| 1369984_at   | NM_053540 | cytochrome c oxidase, subunit XVII assembly protein homolog (yeast)                       | Cox17             | 0.685 | 0.617 | 1.535 | 0.051 | 0.695  | 0.274 | 0.760  | 0.394 |
| 1387773_at   | NM_012839 | cytochrome c, somatic                                                                     | Cyes              | 0.851 | 0.315 | 1.502 | 0.088 | 0.989  | 0.466 | 1.416  | 0.026 |
| 1369939_at   | AI104240  | cytochrome c, somatic                                                                     | Cyes              | 0.901 | 0.922 | 1.069 | 0.026 | 0.947  | 0.339 | 1.216  | 0.021 |
| 1369321_s_at | NM_012840 | cytochrome c, testis /// phosphodiesterase 11A                                            | Cyct /// Pde11a   | 0.654 | 0.725 | 1.963 | 0.290 | 1.923  | 0.975 | 1.862  | 0.858 |
| 1371342_at   | BI277021  | cytochrome c-1 (predicted)                                                                | Cyc1_predicted    | 0.450 | 0.105 | 1.223 | 0.850 | 0.640  | 0.021 | 1.062  | 0.556 |
| 1387916_at   | U39208    | cytochrome P450 4F6                                                                       | Cyp4f6            | 0.958 | 0.563 | 0.938 | 0.074 | 0.775  | 0.369 | 0.837  | 0.110 |
| 1368990_at   | NM_012940 | cytochrome P450, family 1, subfamily b, polypeptide 1                                     | Cyp1b1            | 1.000 | 0.994 | 0.600 | 0.078 | 0.997  | 0.957 | 0.729  | 0.102 |
| 1378551_at   | BE118606  | cytochrome P450, family 20, subfamily A, polypeptide 1                                    | Cyp20a1           | 0.982 | 0.278 | 1.368 | 0.007 | 0.883  | 0.473 | 1.262  | 0.018 |
| 1387583_at   | NM_130408 | cytochrome P450, family 26, subfamily A, polypeptide 1                                    | Cyp26a1           | 1.003 | 0.995 | 0.892 | 0.149 | 1.884  | 0.070 | 0.892  | 0.589 |
| 1387914_at   | M73231    | cytochrome P450, family 27, subfamily a, polypeptide 1                                    | Cyp27a1           | 4.779 | 0.021 | 6.504 | 0.000 | 36.640 | 0.001 | 31.496 | 0.006 |
| 1368636_at   | NM_053763 | cytochrome P450, family 27, subfamily b, polypeptide 1                                    | Cyp27b1           | 1.271 | 0.314 | 0.965 | 0.798 | 1.631  | 0.116 | 0.861  | 0.499 |
| 1367979_s_at | NM_012941 | cytochrome P450, subfamily 51                                                             | Cyp51             | 0.554 | 0.086 | 1.037 | 0.526 | 0.479  | 0.107 | 0.866  | 0.053 |
| 1387020_at   | BG664123  | cytochrome P450, subfamily 51                                                             | Cyp51             | 0.486 | 0.134 | 0.954 | 0.636 | 0.413  | 0.029 | 0.872  | 0.070 |
| 1370475_at   | M20406    | cytochrome P450IIB3                                                                       | Cyp2b3            | 0.996 | 0.984 | 1.002 | 0.917 | 1.004  | 0.180 | 1.005  | 0.874 |
| 1385334_at   | AA818166  | Cytochrome P450-like protein                                                              | Loc266761         | 0.650 | 0.002 | 0.371 | 0.000 | 0.576  | 0.036 | 0.640  | 0.090 |
| 1388127_at   | AI170346  | cytochrome P450-like protein                                                              | Loc266761         | 0.773 | 0.658 | 1.120 | 0.708 | 0.726  | 0.225 | 1.741  | 0.103 |
| 1372498_at   | BF285068  | cytokine induced apoptosis inhibitor 1                                                    | Ciapin1           | 0.477 | 0.043 | 1.393 | 0.040 | 0.346  | 0.020 | 1.653  | 0.002 |
| 1378586_at   | BI291842  | Cytokine inducible SH2-containing protein                                                 | Cish              | 2.029 | 0.154 | 0.971 | 0.747 | 2.089  | 0.140 | 1.001  | 0.989 |

|              |           |                                                                               |                      |       |       |       |       |       |       |       |       |
|--------------|-----------|-------------------------------------------------------------------------------|----------------------|-------|-------|-------|-------|-------|-------|-------|-------|
| 1389294_at   | AI103084  | cytoplasmic FMR1 interacting protein 1 (predicted)                            | Cyfp1_predicted      | 1.555 | 0.043 | 1.055 | 0.963 | 1.368 | 0.057 | 0.908 | 0.051 |
| 1379150_at   | BF404462  | Cytoplasmic FMR1 interacting protein 2 (predicted)                            | Cyfp2_predicted      | 0.763 | 0.229 | 0.958 | 0.712 | 1.542 | 0.181 | 1.549 | 0.164 |
| 1398533_at   | BE105837  | cytoplasmic FMR1 interacting protein 2 (predicted)                            | Cyfp2_predicted      | 1.031 | 0.537 | 1.345 | 0.320 | 0.813 | 0.990 | 1.375 | 1.000 |
| 1368571_at   | NM_021997 | cytoplasmic linker 2                                                          | Cyln2                | 2.463 | 0.020 | 2.614 | 0.000 | 3.041 | 0.004 | 2.149 | 0.001 |
| 1377589_at   | BF386215  | Cytoplasmic linker 2                                                          | Cyln2                | 1.614 | 0.984 | 1.580 | 0.039 | 1.589 | 0.282 | 1.281 | 0.492 |
| 1375685_at   | BI282257  | cytoplasmic linker associated protein 1                                       | Clasp1               | 2.751 | 0.000 | 1.030 | 0.458 | 3.030 | 0.001 | 1.091 | 0.391 |
| 1384015_at   | AI044920  | cytoplasmic linker associated protein 1                                       | Clasp1               | 1.426 | 0.209 | 2.581 | 0.063 | 1.362 | 0.041 | 1.213 | 0.390 |
| 1392996_at   | BG668435  | cytoplasmic polyadenylation element binding protein 1 (predicted)             | Cpeb1_predicted      | 1.372 | 0.388 | 1.638 | 0.011 | 1.116 | 0.431 | 1.819 | 0.012 |
| 1390628_at   | AI010275  | cytoplasmic polyadenylation element binding protein 2 (predicted)             | Cpeb2_predicted      | 1.498 | 0.005 | 1.426 | 0.052 | 1.419 | 0.005 | 1.219 | 0.023 |
| 1396225_at   | BG666316  | cytoplasmic polyadenylation element binding protein 2 (predicted)             | Cpeb2_predicted      | 1.168 | 0.337 | 1.872 | 0.020 | 0.970 | 0.765 | 2.272 | 0.113 |
| 1372223_at   | BG374299  | cytoplasmic polyadenylation element binding protein 4 (predicted)             | Cpeb4_predicted      | 1.474 | 0.007 | 0.731 | 0.036 | 1.216 | 0.442 | 0.745 | 0.035 |
| 1393294_at   | BG671389  | cytoplasmic polyadenylation element binding protein 4 (predicted)             | Cpeb4_predicted      | 1.803 | 0.047 | 2.029 | 0.013 | 1.295 | 0.538 | 1.460 | 0.021 |
| 1388405_at   | BI294780  | cytoskeleton associated protein 5                                             | Ckap5                | 1.117 | 0.980 | 1.112 | 0.123 | 0.953 | 0.829 | 1.152 | 0.244 |
| 1371885_at   | BI282366  | cytoskeleton-associated protein 1 (predicted)                                 | Ckap1_predicted      | 0.927 | 0.952 | 2.757 | 0.002 | 0.671 | 0.519 | 2.105 | 0.008 |
| 1375654_at   | BI278813  | cytoskeleton-associated protein 4 (predicted)                                 | Ckap4_predicted      | 1.515 | 0.022 | 1.114 | 0.772 | 0.810 | 0.195 | 1.588 | 0.829 |
| 1375643_at   | BM384259  | cytoskeleton-associated protein 4 (predicted)                                 | Ckap4_predicted      | 0.829 | 0.453 | 0.697 | 0.036 | 0.732 | 0.712 | 0.796 | 0.006 |
| 1384198_at   | BF288648  | cytosolic ovarian carcinoma antigen 1 (predicted)                             | Cova1_predicted      | 0.771 | 0.323 | 0.712 | 0.098 | 1.118 | 0.180 | 0.778 | 0.212 |
| 1397692_at   | BE104820  | cytotoxic granule-associated RNA binding protein 1                            | Tia1                 | 1.251 | 0.024 | 0.947 | 0.657 | 1.478 | 0.045 | 0.854 | 0.543 |
| 1374786_at   | BI298817  | Cytotoxic granule-associated RNA binding protein 1                            | Tia1                 | 1.191 | 0.740 | 0.454 | 0.016 | 0.784 | 0.224 | 0.768 | 0.134 |
| 1387874_at   | AI230048  | D site albumin promoter binding protein                                       | Dbp                  | 1.160 | 0.435 | 5.773 | 0.010 | 1.006 | 0.921 | 7.062 | 0.015 |
| 1388105_at   | BE113021  | D123 gene product                                                             | D123                 | 0.443 | 0.199 | 0.653 | 0.016 | 0.547 | 0.022 | 0.814 | 0.018 |
| 1372166_at   | AI169146  | D4, zinc and double PHD fingers family 2 (predicted)                          | Dpf2_predicted       | 1.290 | 0.124 | 1.522 | 0.032 | 1.646 | 0.003 | 1.617 | 0.012 |
| 1399162_a_at | AJ277077  | damage-specific DNA binding protein 1                                         | Ddb1                 | 0.334 | 0.351 | 0.409 | 0.006 | 0.535 | 0.010 | 0.596 | 0.083 |
| 1383205_at   | BI288833  | dapper homolog 2, antagonist of beta-catenin (xenopus) (predicted)            | Dact2_predicted      | 1.058 | 0.802 | 2.213 | 0.013 | 0.957 | 0.388 | 1.160 | 0.566 |
| 1373046_at   | AW918273  | DAZ associated protein 1                                                      | Dazap1               | 1.462 | 0.256 | 2.822 | 0.003 | 1.677 | 0.156 | 2.409 | 0.009 |
| 1372511_at   | AI102612  | DAZ associated protein 2                                                      | Dazap2               | 0.844 | 0.247 | 1.656 | 0.105 | 1.123 | 0.074 | 1.484 | 0.155 |
| 1382281_at   | BI296136  | DAZ associated protein 2                                                      | Dazap2               | 1.002 | 0.284 | 0.994 | 0.660 | 0.940 | 0.830 | 0.745 | 0.638 |
| 1367532_at   | AA893186  | DAZ associated protein 2                                                      | Dazap2               | 0.962 | 0.340 | 0.924 | 0.541 | 0.787 | 0.831 | 1.024 | 0.772 |
| 1385369_at   | BI290883  | DAZ interacting protein 1-like                                                | Dzip1l               | 3.521 | 0.009 | 5.073 | 0.023 | 3.320 | 0.009 | 4.074 | 0.069 |
| 1372999_at   | AI171216  | DCN1, defective in cullin neddylation 1, domain containing 5 (S. cerevisiae)  | Dcun1d5              | 1.029 | 0.676 | 0.965 | 0.837 | 1.052 | 0.932 | 1.074 | 0.180 |
| 1375432_at   | AI171599  | DD6A4-12(7)-2 mRNA, partial sequence                                          | ---                  | 0.981 | 0.228 | 1.106 | 0.906 | 1.357 | 0.171 | 1.125 | 0.241 |
| 1394597_at   | AI101356  | DDHD domain containing 1                                                      | Ddhd1                | 0.783 | 0.558 | 1.593 | 0.613 | 1.138 | 0.741 | 1.076 | 0.087 |
| 1392072_at   | BE108176  | D-dopachrome tautomerase                                                      | Ddt                  | 0.788 | 0.004 | 0.939 | 0.324 | 0.815 | 0.347 | 0.800 | 0.098 |
| 1367793_at   | NM_024131 | D-dopachrome tautomerase                                                      | Ddt                  | 0.485 | 0.514 | 1.845 | 0.112 | 0.304 | 0.001 | 1.332 | 0.060 |
| 1371837_at   | AA851926  | ddx5 gene                                                                     | Ddx5                 | 0.576 | 0.010 | 0.335 | 0.000 | 0.703 | 0.023 | 0.428 | 0.002 |
| 1373319_at   | BF419628  | DEAD (Asp-Glu-Ala-Asp) box polypeptide 1                                      | Ddx1                 | 0.722 | 0.209 | 1.246 | 0.014 | 0.687 | 0.010 | 1.230 | 0.392 |
| 1397529_at   | BI296754  | DEAD (Asp-Glu-Ala-Asp) box polypeptide 17                                     | Ddx17                | 0.814 | 0.532 | 0.382 | 0.003 | 0.728 | 0.348 | 0.395 | 0.005 |
| 1397405_at   | BM385221  | DEAD (Asp-Glu-Ala-Asp) box polypeptide 17                                     | Ddx17                | 0.927 | 0.857 | 0.231 | 0.003 | 0.883 | 0.868 | 0.238 | 0.002 |
| 1377945_at   | AI111512  | DEAD (Asp-Glu-Ala-Asp) box polypeptide 18                                     | Ddx18                | 0.769 | 0.003 | 1.513 | 0.026 | 0.965 | 0.699 | 1.251 | 0.065 |
| 1397508_at   | BE106682  | DEAD (Asp-Glu-Ala-Asp) box polypeptide 18                                     | Ddx18                | 0.731 | 0.015 | 1.341 | 0.132 | 0.761 | 0.428 | 1.029 | 0.209 |
| 1383559_at   | AI144819  | DEAD (Asp-Glu-Ala-Asp) box polypeptide 19                                     | Ddx19                | 1.112 | 0.213 | 1.575 | 0.072 | 0.999 | 0.443 | 1.029 | 0.085 |
| 1380012_at   | BF399592  | DEAD (Asp-Glu-Ala-Asp) box polypeptide 19                                     | Ddx19                | 1.096 | 0.599 | 1.006 | 0.452 | 1.001 | 0.536 | 0.847 | 0.351 |
| 1388814_at   | AI408110  | DEAD (Asp-Glu-Ala-Asp) box polypeptide 19                                     | Ddx19                | 0.789 | 0.626 | 0.821 | 0.247 | 0.420 | 0.046 | 0.743 | 0.008 |
| 1388843_at   | BI296771  | DEAD (Asp-Glu-Ala-Asp) box polypeptide 19                                     | Ddx19                | 0.782 | 0.691 | 0.917 | 0.682 | 0.999 | 0.683 | 1.040 | 0.502 |
| 1375901_at   | AI178527  | DEAD (Asp-Glu-Ala-Asp) box polypeptide 21a                                    | Ddx21a               | 0.955 | 0.030 | 1.603 | 0.026 | 0.850 | 0.116 | 1.610 | 0.015 |
| 1396187_at   | AI136551  | DEAD (Asp-Glu-Ala-Asp) box polypeptide 21a                                    | Ddx21a               | 1.019 | 0.740 | 1.023 | 0.924 | 0.556 | 0.045 | 1.095 | 0.104 |
| 1373809_at   | BI296325  | DEAD (Asp-Glu-Ala-Asp) box polypeptide 21b /// hypothetical protein LOC606294 | Ddx21b /// LOC606294 | 0.643 | 0.143 | 0.375 | 0.013 | 0.487 | 0.039 | 0.263 | 0.006 |
| 1376739_at   | AW252511  | DEAD (Asp-Glu-Ala-Asp) box polypeptide 24                                     | Ddx24                | 0.800 | 0.038 | 1.722 | 0.011 | 0.719 | 0.289 | 1.538 | 0.019 |
| 1376116_at   | BM389678  | DEAD (Asp-Glu-Ala-Asp) box polypeptide 24                                     | Ddx24                | 0.888 | 0.550 | 1.007 | 0.594 | 0.808 | 0.100 | 1.104 | 0.455 |
| 1368619_at   | NM_031630 | DEAD (Asp-Glu-Ala-Asp) box polypeptide 25                                     | Ddx25                | 0.702 | 0.087 | 0.412 | 0.008 | 0.902 | 0.265 | 0.311 | 0.011 |
| 1397551_at   | BG373974  | DEAD (Asp-Glu-Ala-Asp) box polypeptide 27                                     | Ddx27                | 0.978 | 0.447 | 1.591 | 0.067 | 0.899 | 0.790 | 1.143 | 0.486 |
| 1384377_at   | BI284877  | DEAD (Asp-Glu-Ala-Asp) box polypeptide 28 (predicted)                         | Ddx28_predicted      | 0.648 | 0.058 | 1.059 | 0.047 | 0.484 | 0.030 | 1.112 | 0.403 |
| 1387048_at   | NM_053563 | DEAD (Asp-Glu-Ala-Asp) box polypeptide 39                                     | Ddx39                | 0.912 | 0.649 | 2.962 | 0.000 | 0.921 | 0.814 | 2.394 | 0.001 |
| 1372377_at   | BM389310  | DEAD (Asp-Glu-Ala-Asp) box polypeptide 41 (predicted)                         | Ddx41_predicted      | 0.872 | 0.200 | 0.686 | 0.028 | 0.694 | 0.123 | 0.776 | 0.035 |
| 1376596_at   | BI295847  | DEAD (Asp-Glu-Ala-Asp) box polypeptide 42 (predicted)                         | Ddx42_predicted      | 1.123 | 0.289 | 1.047 | 0.451 | 1.023 | 0.790 | 1.073 | 0.623 |
| 1379896_at   | BM390256  | DEAD (Asp-Glu-Ala-Asp) box polypeptide 42 (predicted)                         | Ddx42_predicted      | 1.250 | 0.396 | 2.230 | 0.007 | 1.218 | 0.114 | 1.466 | 0.050 |
| 1387912_at   | U25746    | DEAD (Asp-Glu-Ala-Asp) box polypeptide 46                                     | Ddx46                | 0.419 | 0.057 | 0.341 | 0.000 | 0.508 | 0.022 | 0.312 | 0.028 |
| 1375554_at   | BM390927  | DEAD (Asp-Glu-Ala-Asp) box polypeptide 47                                     | Ddx47                | 0.972 | 0.718 | 1.444 | 0.008 | 0.722 | 0.172 | 1.196 | 0.421 |
| 1374332_at   | AI171365  | DEAD (Asp-Glu-Ala-Asp) box polypeptide 49 (predicted)                         | Ddx49_predicted      | 0.673 | 0.353 | 2.139 | 0.027 | 0.493 | 0.026 | 2.401 | 0.039 |
| 1390688_at   | AA799576  | DEAD (Asp-Glu-Ala-Asp) box polypeptide 50                                     | Ddx50                | 0.930 | 0.374 | 2.122 | 0.000 | 1.268 | 0.269 | 1.539 | 0.014 |
| 1373682_at   | BI290764  | DEAD (Asp-Glu-Ala-Asp) box polypeptide 51 (predicted)                         | Ddx51_predicted      | 0.775 | 0.287 | 1.299 | 0.471 | 0.555 | 0.056 | 1.164 | 0.940 |

|              |           |                                                                                                                 |                   |       |       |        |       |        |       |        |       |
|--------------|-----------|-----------------------------------------------------------------------------------------------------------------|-------------------|-------|-------|--------|-------|--------|-------|--------|-------|
| 1368588_at   | NM_053525 | DEAD (Asp-Glu-Ala-Asp) box polypeptide 52                                                                       | Ddx52             | 1.337 | 0.349 | 2.258  | 0.055 | 3.419  | 0.059 | 2.251  | 0.040 |
| 1391889_at   | BG671963  | DEAD (Asp-Glu-Ala-Asp) box polypeptide 52                                                                       | Ddx52             | 1.049 | 0.501 | 1.401  | 0.111 | 1.022  | 0.932 | 1.050  | 0.038 |
| 1378497_at   | BF400776  | DEAD (Asp-Glu-Ala-Asp) box polypeptide 55 (predicted)                                                           | Ddx55_predicted   | 0.822 | 0.058 | 1.087  | 0.088 | 0.620  | 0.034 | 0.876  | 0.203 |
| 1383635_at   | BM385099  | DEAD (Asp-Glu-Ala-Asp) box polypeptide 59                                                                       | Ddx59             | 0.472 | 0.009 | 0.710  | 0.944 | 0.579  | 0.003 | 1.424  | 0.249 |
| 1376468_at   | AI411501  | dead end homolog 1 (zebrafish)                                                                                  | Dnd1              | 0.788 | 0.618 | 1.163  | 0.264 | 0.611  | 0.061 | 1.001  | 0.295 |
| 1395533_at   | BF552813  | dead end homolog 1 (zebrafish)                                                                                  | Dnd1              | 0.544 | 0.991 | 0.710  | 0.052 | 0.333  | 0.072 | 0.205  | 0.000 |
| 1391118_at   | BI280337  | DEAD/H (Asp-Glu-Ala-Asp/His) box polypeptide 11 (CHL1-like helicase homolog, <i>S. cerevisiae</i> ) (predicted) | Ddx11_predicted   | 0.906 | 0.992 | 0.999  | 0.309 | 1.004  | 0.986 | 1.010  | 0.468 |
| 1370979_at   | BF282783  | DEAD/H (Asp-Glu-Ala-Asp/His) box polypeptide 20, 103kD                                                          | Ddx20             | 1.088 | 0.698 | 1.187  | 0.054 | 1.214  | 0.111 | 1.364  | 0.024 |
| 1399123_at   | BI302415  | DEAD/H (Asp-Glu-Ala-Asp/His) box polypeptide 26                                                                 | Ddx26             | 1.310 | 0.135 | 0.611  | 0.002 | 0.889  | 0.435 | 0.555  | 0.005 |
| 1380464_at   | AI145031  | DEAD/H (Asp-Glu-Ala-Asp/His) box polypeptide 26                                                                 | Ddx26             | 0.926 | 0.596 | 0.992  | 0.984 | 1.761  | 0.514 | 0.958  | 0.897 |
| 1385482_at   | BI293434  | DEAD/H (Asp-Glu-Ala-Asp/His) box polypeptide 26                                                                 | Ddx26             | 1.133 | 0.743 | 0.618  | 0.277 | 1.296  | 0.746 | 1.557  | 0.456 |
| 1372242_at   | AI169598  | DEAD/H (Asp-Glu-Ala-Asp/His) box polypeptide 3, X-linked                                                        | Ddx3x             | 1.045 | 0.492 | 0.746  | 0.003 | 1.010  | 0.192 | 0.946  | 0.411 |
| 1386535_at   | BG667163  | DEAD/H (Asp-Glu-Ala-Asp/His) box polypeptide 3, X-linked                                                        | Ddx3x             | 1.070 | 0.716 | 0.895  | 0.031 | 1.477  | 0.229 | 0.683  | 0.061 |
| 1385214_at   | BF391513  | DEAD/H (Asp-Glu-Ala-Asp/His) box polypeptide 3, X-linked                                                        | Ddx3x             | 0.880 | 0.888 | 2.351  | 0.013 | 1.663  | 0.807 | 1.417  | 0.133 |
| 1374506_at   | BI296403  | DEAD/H (Asp-Glu-Ala-Asp/His) box polypeptide 31 (predicted)                                                     | Ddx31_predicted   | 0.694 | 0.031 | 0.552  | 0.051 | 0.479  | 0.023 | 0.513  | 0.035 |
| 1374470_at   | AI102264  | DEAH (Asp-Glu-Ala-Asp/His) box polypeptide 57                                                                   | Dhx57             | 1.043 | 0.982 | 0.567  | 0.031 | 1.178  | 0.417 | 0.721  | 0.093 |
| 1398937_at   | BI279381  | DEAH (Asp-Glu-Ala-His) box polypeptide 15 (predicted)                                                           | Dhx15_predicted   | 0.852 | 0.434 | 1.269  | 0.011 | 0.851  | 0.104 | 0.999  | 0.240 |
| 1399084_at   | BF405883  | DEAH (Asp-Glu-Ala-His) box polypeptide 16                                                                       | Dhx16             | 0.962 | 0.537 | 0.969  | 0.659 | 1.115  | 0.402 | 0.969  | 0.167 |
| 1374858_at   | BF420262  | DEAH (Asp-Glu-Ala-His) box polypeptide 29 (predicted)                                                           | Dhx29_predicted   | 0.762 | 0.008 | 1.057  | 0.581 | 0.804  | 0.389 | 1.205  | 0.075 |
| 1388595_at   | AI102995  | DEAH (Asp-Glu-Ala-His) box polypeptide 30                                                                       | Dhx30             | 0.627 | 0.053 | 1.027  | 0.718 | 0.735  | 0.048 | 1.051  | 0.617 |
| 1395579_at   | BG666347  | DEAH (Asp-Glu-Ala-His) box polypeptide 32 (predicted)                                                           | Dhx32_predicted   | 0.491 | 0.305 | 0.583  | 0.167 | 0.218  | 0.064 | 0.590  | 0.153 |
| 1377763_at   | BF283765  | DEAH (Asp-Glu-Ala-His) box polypeptide 33 (predicted)                                                           | Dhx33_predicted   | 0.867 | 0.874 | 0.447  | 0.063 | 1.126  | 0.726 | 0.551  | 0.016 |
| 1376437_at   | BM383834  | DEAH (Asp-Glu-Ala-His) box polypeptide 33 (predicted)                                                           | Dhx33_predicted   | 0.726 | 0.902 | 1.259  | 0.482 | 0.870  | 0.529 | 0.998  | 0.415 |
| 1385871_at   | AA859982  | DEAH (Asp-Glu-Ala-His) box polypeptide 36 (predicted)                                                           | Dhx36_predicted   | 1.490 | 0.062 | 1.296  | 0.106 | 0.774  | 0.109 | 1.146  | 0.064 |
| 1385872_at   | AI237532  | DEAH (Asp-Glu-Ala-His) box polypeptide 36 (predicted)                                                           | Dhx36_predicted   | 1.293 | 0.069 | 1.430  | 0.010 | 0.793  | 0.158 | 1.184  | 0.128 |
| 1377906_at   | BF404389  | DEAH (Asp-Glu-Ala-His) box polypeptide 36 (predicted)                                                           | Dhx36_predicted   | 0.987 | 0.952 | 0.994  | 0.938 | 0.538  | 0.980 | 0.997  | 0.984 |
| 1377785_at   | BI275330  | DEAH (Asp-Glu-Ala-His) box polypeptide 40                                                                       | Dhx40             | 0.566 | 0.885 | 2.011  | 0.001 | 0.703  | 0.475 | 1.602  | 0.029 |
| 1374299_at   | BF398414  | DEAH (Asp-Glu-Ala-His) box polypeptide 9 (predicted)                                                            | Dhx9_predicted    | 0.704 | 0.051 | 0.610  | 0.020 | 0.777  | 0.855 | 0.575  | 0.006 |
| 1389535_at   | BI285645  | death associated protein 3                                                                                      | Dap3              | 0.989 | 0.400 | 1.006  | 0.957 | 1.109  | 0.306 | 0.971  | 0.684 |
| 1376788_at   | AA818353  | death associated protein kinase 1 (predicted)                                                                   | Dapk1_predicted   | 1.427 | 0.163 | 1.588  | 0.001 | 1.585  | 0.088 | 1.906  | 0.001 |
| 1379911_at   | BI281823  | death associated protein kinase 1 (predicted)                                                                   | Dapk1_predicted   | 1.003 | 0.965 | 1.002  | 0.787 | 0.959  | 0.612 | 1.408  | 0.694 |
| 1398434_at   | BE107465  | Death associated transcription factor 1 (predicted)                                                             | Datf1_predicted   | 1.457 | 0.124 | 0.860  | 0.109 | 1.471  | 0.098 | 0.992  | 0.491 |
| 1393698_at   | BE106785  | Death associated transcription factor 1 (predicted)                                                             | Datf1_predicted   | 1.165 | 0.632 | 0.995  | 0.982 | 1.001  | 0.314 | 1.003  | 0.623 |
| 1382326_at   | AI555347  | Death effector domain-containing                                                                                | Dedd              | 1.323 | 0.033 | 1.050  | 0.981 | 1.447  | 0.087 | 1.034  | 0.310 |
| 1369941_at   | NM_022526 | death-associated protein                                                                                        | Dap               | 1.380 | 0.218 | 1.604  | 0.021 | 0.967  | 0.364 | 1.286  | 0.808 |
| 1392216_at   | BF403731  | Death-associated protein kinase 3                                                                               | Dapk3             | 1.716 | 0.235 | 5.896  | 0.031 | 1.472  | 0.339 | 3.196  | 0.009 |
| 1367621_at   | NM_022546 | death-associated protein kinase 3                                                                               | Dapk3             | 0.999 | 0.936 | 1.242  | 0.326 | 1.001  | 0.701 | 0.999  | 0.873 |
| 1390185_at   | BE109709  | decapping enzyme, scavenger                                                                                     | Dcps              | 0.793 | 0.548 | 2.047  | 0.223 | 1.469  | 0.218 | 1.437  | 0.490 |
| 1387951_at   | AB032395  | decay accelarating factor 1                                                                                     | Daf1              | 2.377 | 0.109 | 2.846  | 0.010 | 1.793  | 0.691 | 2.570  | 0.017 |
| 1380352_at   | AA956439  | Dedicator of cyto-kinesis 1 (predicted)                                                                         | Dock1_predicted   | 1.244 | 0.715 | 1.149  | 0.774 | 0.965  | 0.091 | 1.003  | 0.636 |
| 1384525_at   | AI549335  | dedicator of cytokinesis 11                                                                                     | Dock11            | 1.741 | 0.059 | 0.717  | 0.046 | 1.416  | 0.627 | 0.911  | 0.969 |
| 1370905_at   | BI291229  | dedicator of cytokinesis 9                                                                                      | Dock9             | 0.752 | 0.356 | 0.972  | 0.822 | 1.171  | 0.248 | 1.317  | 0.022 |
| 1367465_at   | AI013627  | defender against cell death 1                                                                                   | Dad1              | 0.732 | 0.243 | 0.870  | 0.112 | 0.705  | 0.014 | 0.819  | 0.026 |
| 1369660_at   | AF068860  | defensin beta 1                                                                                                 | Defb1             | 3.204 | 0.043 | 1.914  | 0.049 | 1.752  | 0.115 | 1.101  | 0.951 |
| 1386988_at   | NM_031801 | deformed epidermal autoregulatory factor 1 ( <i>Drosophila</i> )                                                | Deaf1             | 0.647 | 0.014 | 0.275  | 0.012 | 0.653  | 0.536 | 0.474  | 0.004 |
| 1367770_at   | NM_053323 | degenerative spermatocyte homolog 1 ( <i>Drosophila</i> )                                                       | Degs1             | 0.605 | 0.994 | 0.796  | 0.134 | 0.682  | 0.097 | 0.975  | 0.442 |
| 1388687_at   | BI274588  | dehydrodolichyl diphosphate synthase                                                                            | Dhdds             | 0.420 | 0.225 | 0.743  | 0.182 | 0.329  | 0.015 | 0.626  | 0.183 |
| 1390172_at   | AI409946  | dehydrogenase E1 and transketolase domain containing 1                                                          | Dhtkd1            | 0.383 | 0.029 | 0.446  | 0.004 | 0.713  | 0.691 | 0.538  | 0.016 |
| 1389407_at   | BE099453  | dehydrogenase/reductase (SDR family) member 1                                                                   | Dhrs1             | 0.295 | 0.000 | 0.251  | 0.003 | 0.393  | 0.016 | 0.299  | 0.027 |
| 1391259_at   | BE104618  | Dehydrogenase/reductase (SDR family) member 1                                                                   | Dhrs1             | 0.340 | 0.006 | 0.462  | 0.004 | 0.271  | 0.003 | 0.322  | 0.013 |
| 1373240_at   | BI276935  | dehydrogenase/reductase (SDR family) member 3                                                                   | Dhrs3             | 0.862 | 0.321 | 0.482  | 0.009 | 0.998  | 0.987 | 0.345  | 0.003 |
| 1370814_at   | AB062758  | dehydrogenase/reductase (SDR family) member 4                                                                   | Dhrs4             | 0.305 | 0.004 | 0.069  | 0.003 | 0.442  | 0.039 | 0.110  | 0.013 |
| 1374617_at   | AI408791  | dehydrogenase/reductase (SDR family) member 7B                                                                  | Dhrs7b            | 0.781 | 0.268 | 1.133  | 0.708 | 1.019  | 0.867 | 1.083  | 0.599 |
| 1374440_at   | BE098506  | dehydrogenase/reductase (SDR family) member 8                                                                   | Dhrs8             | 1.142 | 0.407 | 1.948  | 0.131 | 1.191  | 0.348 | 1.536  | 0.061 |
| 1388832_at   | AI104245  | dehydrogenase/reductase (SDR family) X chromosome (predicted)                                                   | Dhrsx_predicted   | 0.750 | 0.692 | 1.091  | 0.065 | 1.132  | 0.707 | 0.999  | 0.983 |
| 1387103_s_at | NM_031720 | deiodinase, iodothyronine, type II /// solute carrier family 25 (mitochondrial carrier, brain), member 14       | Dio2 /// Slc25a14 | 0.468 | 0.130 | 0.690  | 0.010 | 0.591  | 0.323 | 0.619  | 0.015 |
| 1372259_at   | BI295054  | DEK oncogene (DNA binding)                                                                                      | Dek               | 1.115 | 0.613 | 0.847  | 0.030 | 2.172  | 0.012 | 0.935  | 0.102 |
| 1374564_at   | BE099401  | deltex 2 homolog ( <i>Drosophila</i> )                                                                          | Dtx2              | 1.336 | 0.001 | 0.672  | 0.090 | 2.534  | 0.007 | 0.928  | 0.460 |
| 1370506_at   | U46149    | demethyl-Q 7                                                                                                    | Coq7              | 0.547 | 0.097 | 1.004  | 0.998 | 0.283  | 0.104 | 0.508  | 0.134 |
| 1380021_at   | AI059486  | DENN/MADD domain containing 2D (predicted)                                                                      | Dennd2d_predicted | 8.539 | 0.007 | 13.240 | 0.001 | 13.389 | 0.000 | 13.476 | 0.000 |
| 1387626_at   | NM_024158 | deoxycytidine kinase                                                                                            | Dck               | 0.784 | 0.883 | 1.004  | 0.999 | 1.008  | 0.915 | 1.748  | 0.443 |

|              |           |                                                                                       |                   |       |       |       |       |       |       |       |       |
|--------------|-----------|---------------------------------------------------------------------------------------|-------------------|-------|-------|-------|-------|-------|-------|-------|-------|
| 1372799_at   | BF285179  | deoxyguanosine kinase (predicted)                                                     | Dguok_predicted   | 1.136 | 0.809 | 0.374 | 0.021 | 0.922 | 0.536 | 0.458 | 0.001 |
| 1379435_at   | AI599463  | deoxyguanosine kinase (predicted)                                                     | Dguok_predicted   | 1.435 | 0.994 | 0.355 | 0.041 | 0.613 | 0.384 | 0.397 | 0.166 |
| 1388803_at   | AA892493  | deoxyhypusine synthase                                                                | Dhps              | 0.530 | 0.755 | 0.710 | 0.683 | 0.692 | 0.269 | 1.041 | 0.820 |
| 1370914_at   | BM384112  | deoxynucleotidyltransferase, terminal, interacting protein 1                          | Dnttip1           | 0.715 | 0.168 | 0.898 | 0.700 | 0.480 | 0.269 | 0.883 | 0.437 |
| 1370915_s_at | BM384112  | deoxynucleotidyltransferase, terminal, interacting protein 1                          | Dnttip1           | 0.551 | 0.214 | 0.865 | 0.541 | 0.582 | 0.067 | 0.576 | 0.593 |
| 1383256_at   | BF410997  | deoxynucleotidyltransferase, terminal, interacting protein 2 (predicted)              | Dnttip2_predicted | 0.627 | 0.028 | 1.133 | 0.111 | 0.648 | 0.004 | 1.072 | 0.827 |
| 1382119_at   | BI303937  | deoxynucleotidyltransferase, terminal, interacting protein 2 (predicted)              | Dnttip2_predicted | 0.982 | 0.795 | 0.953 | 0.098 | 0.894 | 0.851 | 0.964 | 0.033 |
| 1379676_a_at | AW527320  | deoxyribonuclease I-like 1                                                            | Dnase1l1          | 1.354 | 0.008 | 0.984 | 0.463 | 1.820 | 0.084 | 2.485 | 0.026 |
| 1368294_at   | NM_053907 | deoxyribonuclease I-like 3                                                            | Dnase1l3          | 1.212 | 0.208 | 0.829 | 0.986 | 2.446 | 0.012 | 1.092 | 0.356 |
| 1383067_a_at | AW141143  | deoxythymidylate kinase (predicted)                                                   | Dtymk_predicted   | 0.990 | 0.619 | 1.436 | 0.167 | 1.496 | 0.127 | 1.154 | 0.347 |
| 1383068_at   | BI290898  | deoxythymidylate kinase (predicted)                                                   | Dtymk_predicted   | 0.907 | 0.819 | 1.174 | 0.038 | 1.148 | 0.330 | 1.079 | 0.356 |
| 1387865_at   | AI411157  | deoxyuridine triphosphatase                                                           | Dut               | 0.279 | 0.002 | 0.303 | 0.023 | 0.271 | 0.003 | 0.384 | 0.000 |
| 1376914_at   | AW253690  | DEP domain containing 1a (predicted)                                                  | Depdc1a_predicted | 1.798 | 0.244 | 0.739 | 0.056 | 1.364 | 0.148 | 0.797 | 0.289 |
| 1380817_at   | BF394055  | DEP domain containing 2 (predicted)                                                   | Depdc2_predicted  | 1.179 | 0.667 | 0.891 | 0.172 | 0.880 | 0.998 | 1.033 | 0.600 |
| 1373752_at   | BE108494  | DEP domain containing 5 (predicted)                                                   | Depdc5_predicted  | 1.047 | 0.085 | 0.521 | 0.046 | 1.727 | 0.958 | 0.916 | 0.218 |
| 1395562_at   | AW524172  | Dephospho-CoA kinase domain containing                                                | Dcakd             | 0.791 | 0.772 | 0.997 | 0.923 | 1.025 | 0.286 | 0.995 | 0.680 |
| 1373461_at   | AI412649  | dermal papilla derived protein 6                                                      | DERP6             | 1.109 | 0.547 | 1.431 | 0.024 | 1.450 | 0.024 | 1.376 | 0.118 |
| 1373947_at   | BI278545  | dermatopontin (predicted)                                                             | Dpt_predicted     | 1.000 | 0.731 | 0.609 | 0.059 | 0.998 | 0.307 | 0.598 | 0.038 |
| 1375936_at   | BI279663  | desmocollin 2                                                                         | Dsc2              | 0.498 | 0.132 | 1.038 | 0.764 | 0.520 | 0.056 | 0.842 | 0.300 |
| 1388506_at   | AW144509  | desmoplakin                                                                           | Dsp               | 1.516 | 0.005 | 1.855 | 0.075 | 1.292 | 0.035 | 2.483 | 0.210 |
| 1371375_at   | BI285599  | destrin                                                                               | Dstn              | 1.354 | 0.107 | 1.537 | 0.010 | 0.878 | 0.602 | 1.057 | 0.352 |
| 1375881_at   | AI170442  | destrin                                                                               | Dstn              | 1.815 | 0.132 | 1.259 | 0.228 | 0.868 | 0.897 | 0.906 | 0.154 |
| 1380545_at   | BF419027  | development and differentiation enhancing (predicted)                                 | Ddef1_predicted   | 0.427 | 0.007 | 1.081 | 0.360 | 0.948 | 0.244 | 0.782 | 0.905 |
| 1390441_at   | AW527409  | Development and differentiation enhancing (predicted)                                 | Ddef1_predicted   | 0.768 | 0.260 | 0.389 | 0.003 | 0.616 | 0.026 | 0.617 | 0.021 |
| 1385228_x_at | AI059117  | development and differentiation enhancing (predicted)                                 | Ddef1_predicted   | 0.893 | 0.362 | 1.590 | 0.010 | 1.096 | 0.738 | 1.593 | 0.013 |
| 1384717_at   | AA894199  | Development and differentiation enhancing (predicted)                                 | Ddef1_predicted   | 0.882 | 0.618 | 0.886 | 0.872 | 1.228 | 0.126 | 0.903 | 0.122 |
| 1381018_a_at | BG378709  | development and differentiation enhancing (predicted)                                 | Ddef1_predicted   | 1.032 | 0.925 | 1.240 | 0.025 | 0.846 | 0.026 | 1.144 | 0.166 |
| 1381019_x_at | BG378709  | development and differentiation enhancing (predicted)                                 | Ddef1_predicted   | 1.019 | 0.937 | 1.347 | 0.313 | 1.020 | 0.094 | 1.217 | 0.151 |
| 1391602_at   | AW527113  | developmentally regulated GTP binding protein 1                                       | Drg1              | 3.140 | 0.091 | 0.740 | 0.514 | 0.571 | 0.413 | 0.923 | 0.146 |
| 1386979_at   | NM_133395 | developmentally regulated protein TPO1                                                | Tpo1              | 1.387 | 0.197 | 1.046 | 0.926 | 2.186 | 0.064 | 1.182 | 0.103 |
| 1376307_a_at | BI289591  | developmentally regulated RNA-binding protein 1                                       | Drb1              | 0.585 | 0.007 | 0.635 | 0.003 | 0.675 | 0.086 | 0.886 | 0.758 |
| 1372017_at   | BE110572  | diablo homolog (Drosophila)                                                           | Diablo            | 0.584 | 0.012 | 0.797 | 0.008 | 0.531 | 0.061 | 0.763 | 0.090 |
| 1367745_at   | NM_031143 | diacylglycerol kinase zeta                                                            | Dgkz              | 0.828 | 0.075 | 1.964 | 0.242 | 0.673 | 0.102 | 1.735 | 0.233 |
| 1387190_at   | NM_080787 | diacylglycerol kinase, alpha                                                          | Dgka              | 0.988 | 0.896 | 1.226 | 0.041 | 2.171 | 0.034 | 1.116 | 0.186 |
| 1397303_at   | AI178467  | Diacylglycerol kinase, alpha                                                          | Dgka              | 1.035 | 0.916 | 1.010 | 0.967 | 0.790 | 0.249 | 1.096 | 0.997 |
| 1381486_at   | BF386108  | Diacylglycerol kinase, beta                                                           | Dgkb              | 1.211 | 0.927 | 0.763 | 0.479 | 0.917 | 0.824 | 1.026 | 0.104 |
| 1374109_at   | AI230466  | diacylglycerol kinase, theta (predicted)                                              | Dgkq_predicted    | 0.808 | 0.141 | 0.646 | 0.114 | 0.864 | 0.288 | 0.987 | 0.278 |
| 1367915_at   | NM_053437 | diacylglycerol O-acyltransferase 1                                                    | Dgat1             | 0.754 | 0.495 | 0.902 | 0.690 | 0.635 | 0.027 | 0.737 | 0.085 |
| 1389371_at   | AI104077  | Diaphanous homolog 2 (Drosophila) (predicted)                                         | Diap2_predicted   | 1.821 | 0.514 | 1.833 | 0.010 | 1.147 | 0.534 | 1.503 | 0.004 |
| 1370235_at   | AI175009  | diazepam binding inhibitor                                                            | Dbi               | 0.888 | 0.671 | 0.689 | 0.188 | 0.907 | 0.453 | 0.784 | 0.055 |
| 1367909_at   | NM_134387 | dicarbonyl L-xylulose reductase                                                       | Dcxr              | 0.240 | 0.008 | 0.888 | 0.719 | 0.264 | 0.008 | 0.570 | 0.251 |
| 1398643_at   | BF388566  | Dicer1, Dcr-1 homolog (Drosophila)                                                    | Dicer1            | 1.635 | 0.486 | 0.717 | 0.671 | 0.604 | 0.023 | 0.896 | 0.801 |
| 1388685_at   | AI011749  | DiGeorge syndrome critical region gene 2                                              | Dgcr2             | 0.709 | 0.023 | 0.696 | 0.019 | 0.582 | 0.050 | 0.575 | 0.014 |
| 1373424_at   | BF284776  | DiGeorge syndrome critical region gene 6 (predicted)                                  | Dgcr6_predicted   | 0.934 | 0.692 | 0.863 | 0.574 | 1.004 | 0.978 | 0.622 | 0.186 |
| 1370075_at   | NM_130400 | dihydrofolate reductase                                                               | Dhfr              | 1.025 | 0.150 | 1.182 | 0.506 | 1.199 | 0.249 | 1.447 | 0.016 |
| 1373201_at   | AI412898  | Dihydrolipoamide branched chain transacylase E2                                       | Dbt               | 0.363 | 0.052 | 0.606 | 0.016 | 0.487 | 0.001 | 0.533 | 0.006 |
| 1373016_at   | AI410493  | dihydrolipoamide dehydrogenase                                                        | Dld               | 0.350 | 0.483 | 0.942 | 0.318 | 0.750 | 0.667 | 0.793 | 0.020 |
| 1388194_at   | BI295900  | dihydrolipoamide S-acetyltransferase (E2 component of pyruvate dehydrogenase complex) | Dlat              | 0.580 | 0.091 | 0.583 | 0.150 | 0.572 | 0.033 | 0.722 | 0.431 |
| 1370879_at   | D90401    | dihydrolipoamide S-succinyltransferase (E2 component of 2-oxo-glutarate complex)      | Dlst              | 0.895 | 0.658 | 0.831 | 0.117 | 1.189 | 0.809 | 0.898 | 0.132 |
| 1382348_at   | AI230216  | dihydroorotate dehydrogenase                                                          | Dhodh             | 0.532 | 0.019 | 1.634 | 0.021 | 0.545 | 0.010 | 1.454 | 0.069 |
| 1380728_at   | BE118404  | Dihydropyrimidinase-like 2                                                            | Dpysl2            | 0.983 | 0.972 | 0.602 | 0.449 | 0.915 | 0.772 | 0.584 | 0.613 |
| 1388479_at   | BI294841  | Dihydropyrimidinase-like 3                                                            | Dpysl3            | 4.091 | 0.002 | 1.912 | 0.105 | 5.804 | 0.000 | 1.664 | 0.073 |
| 1387141_at   | NM_023023 | dihydropyrimidinase-like 5                                                            | Dpysl5            | 0.602 | 0.962 | 0.450 | 0.001 | 1.302 | 0.227 | 0.516 | 0.009 |
| 1389595_at   | BM386615  | dihydrouridine synthase 2-like, SMM1 homolog (S. cerevisiae) (predicted)              | Dus2l_predicted   | 1.800 | 0.111 | 1.277 | 0.074 | 0.680 | 0.559 | 2.096 | 0.027 |
| 1374979_at   | AI102764  | dihydrouridine synthase 3-like (S. cerevisiae)                                        | Dus3l             | 1.116 | 0.698 | 2.254 | 0.017 | 1.079 | 0.715 | 2.364 | 0.047 |
| 1367966_at   | NM_053748 | dipeptidylpeptidase 3                                                                 | Dpp3              | 1.069 | 0.866 | 1.173 | 0.018 | 1.110 | 0.659 | 0.980 | 0.755 |
| 1367722_at   | NM_031973 | dipeptidylpeptidase 7                                                                 | Dpp7              | 1.105 | 0.339 | 2.310 | 0.005 | 0.835 | 0.108 | 1.821 | 0.006 |
| 1382213_at   | AI535527  | dipeptidylpeptidase 8 (predicted)                                                     | Dpp8_predicted    | 1.524 | 0.053 | 1.371 | 0.019 | 1.519 | 0.104 | 1.329 | 0.093 |
| 1374964_at   | AI175505  | dipeptidylpeptidase 8 (predicted)                                                     | Dpp8_predicted    | 1.326 | 0.282 | 0.973 | 0.814 | 1.245 | 0.279 | 0.911 | 0.363 |
| 1370053_at   | BE116953  | Discs, large (Drosophila) homolog-associated protein 1                                | Dlgap1            | 0.679 | 0.203 | 1.249 | 0.679 | 1.650 | 0.784 | 1.110 | 0.854 |
| 1394485_at   | AW532781  | Discs, large (Drosophila) homolog-associated protein 1                                | Dlgap1            | 1.176 | 0.244 | 1.000 | 0.998 | 1.006 | 0.934 | 1.003 | 0.983 |

|              |           |                                                                                                                                                                  |                                                                |       |       |        |       |       |       |        |       |
|--------------|-----------|------------------------------------------------------------------------------------------------------------------------------------------------------------------|----------------------------------------------------------------|-------|-------|--------|-------|-------|-------|--------|-------|
| 1384197_at   | AW521536  | Discs, large (Drosophila) homolog-associated protein 1                                                                                                           | Dlgap1                                                         | 1.495 | 0.576 | 1.564  | 0.110 | 1.776 | 0.038 | 0.899  | 0.917 |
| 1380807_at   | AW529655  | Discs, large homolog 1 (Drosophila)                                                                                                                              | Dlgh1                                                          | 0.662 | 0.503 | 0.465  | 0.189 | 1.836 | 0.328 | 0.643  | 0.135 |
| 1388816_at   | AI413060  | Discs, large homolog 1 (Drosophila)                                                                                                                              | Dlgh1                                                          | 1.079 | 0.530 | 0.796  | 0.101 | 1.152 | 0.969 | 0.907  | 0.467 |
| 1398276_at   | NM_022282 | discs, large homolog 2 (Drosophila)                                                                                                                              | Dlgh2                                                          | 0.509 | 0.054 | 1.970  | 0.034 | 0.165 | 0.002 | 1.043  | 0.269 |
| 1387210_at   | NM_019621 | discs, large homolog 4 (Drosophila) /// hypothetical gene supported by NM_019621                                                                                 | Dlgh4 /// LOC497670                                            | 1.014 | 0.864 | 0.980  | 0.754 | 1.397 | 0.106 | 0.917  | 0.218 |
| 1377121_at   | AW520410  | Discs, large homolog 5 (Drosophila) (predicted)                                                                                                                  | Dlg5_predicted                                                 | 0.821 | 0.783 | 0.878  | 0.183 | 0.741 | 0.034 | 0.907  | 0.069 |
| 1367618_a_at | NM_130734 | discs, large homolog 5 (Drosophila) (predicted)                                                                                                                  | Dlg5_predicted                                                 | 0.973 | 0.982 | 1.194  | 0.016 | 0.750 | 0.067 | 1.144  | 0.085 |
| 1376684_at   | AA874827  | discs, large homolog 7 (Drosophila) (predicted)                                                                                                                  | Dlg7_predicted                                                 | 1.001 | 0.996 | 0.993  | 0.993 | 1.339 | 0.456 | 0.995  | 0.985 |
| 1370507_at   | U67140    | discs, large homolog-associated protein 4 (Drosophila)                                                                                                           | Dlgap4                                                         | 1.474 | 0.078 | 2.389  | 0.028 | 1.661 | 0.076 | 2.176  | 0.016 |
| 1398184_at   | BI294805  | Dishevelled associated activator of morphogenesis 1 (predicted)                                                                                                  | Daam1_predicted                                                | 1.338 | 0.055 | 1.171  | 0.511 | 1.287 | 0.971 | 1.051  | 0.307 |
| 1369997_at   | NM_031820 | dishevelled, dsh homolog 1 (Drosophila)                                                                                                                          | Dvl1                                                           | 1.021 | 0.418 | 2.239  | 0.005 | 0.512 | 0.018 | 1.676  | 0.015 |
| 1375433_at   | AI412473  | Dispatched homolog 2 (Drosophila) (predicted)                                                                                                                    | Disp2_predicted                                                | 0.875 | 0.142 | 0.383  | 0.001 | 0.686 | 0.070 | 0.436  | 0.005 |
| 1390102_at   | AI168996  | disrupted in renal carcinoma 2 homolog (human)                                                                                                                   | Dirc2                                                          | 1.170 | 0.138 | 0.752  | 0.330 | 1.010 | 0.991 | 0.800  | 0.037 |
| 1380558_at   | BM391243  | distal-less homeobox 3 (predicted)                                                                                                                               | Dlx3_predicted                                                 | 1.100 | 0.736 | 1.187  | 0.917 | 1.268 | 0.245 | 1.152  | 0.673 |
| 1367516_at   | BG375549  | distrobrevin binding protein 1                                                                                                                                   | Dtnbp1                                                         | 1.896 | 0.034 | 3.959  | 0.000 | 1.516 | 0.020 | 3.489  | 0.014 |
| 1397473_at   | AI029288  | distrobrevin binding protein 1                                                                                                                                   | Dtnbp1                                                         | 1.722 | 0.154 | 1.565  | 0.014 | 1.595 | 0.601 | 1.844  | 0.085 |
| 1398928_at   | BG378296  | divalent cation tolerant protein CUTA                                                                                                                            | Cuta                                                           | 0.551 | 0.164 | 1.549  | 0.006 | 0.569 | 0.000 | 1.289  | 0.017 |
| 1396056_at   | AW527531  | Dmx-like 1 (predicted)                                                                                                                                           | Dmxl1_predicted                                                | 1.296 | 0.055 | 0.802  | 0.769 | 0.999 | 0.788 | 0.968  | 0.910 |
| 1373772_at   | AI179516  | DNA (cytosine-5-)-methyltransferase 1                                                                                                                            | Dnmt1                                                          | 0.828 | 0.134 | 0.870  | 0.519 | 0.999 | 0.451 | 0.998  | 0.987 |
| 1369438_at   | NM_022857 | DNA binding protein N5                                                                                                                                           | N5                                                             | 1.195 | 0.813 | 1.084  | 0.382 | 1.469 | 0.526 | 1.004  | 0.842 |
| 1383495_at   | AI556858  | DNA cross-link repair 1A, PSO2 homolog (S. cerevisiae) (predicted)                                                                                               | Dclre1a_predicted                                              | 1.713 | 0.119 | 0.787  | 0.305 | 0.935 | 0.963 | 0.566  | 0.013 |
| 1388591_at   | BM383669  | DNA cross-link repair 1B, PSO2 homolog (S. cerevisiae)                                                                                                           | Dclre1b                                                        | 0.843 | 0.202 | 0.817  | 0.234 | 1.008 | 0.684 | 1.092  | 0.165 |
| 1389195_at   | AI236726  | DNA fragmentation factor, alpha subunit                                                                                                                          | Dffa                                                           | 0.903 | 0.838 | 0.877  | 0.168 | 1.247 | 0.341 | 1.288  | 0.036 |
| 1387604_at   | NM_053362 | DNA fragmentation factor, beta subunit                                                                                                                           | Dffb                                                           | 0.999 | 0.894 | 0.827  | 0.234 | 0.999 | 0.958 | 0.736  | 0.239 |
| 1392678_a_at | AA956455  | DNA methyltransferase 3A                                                                                                                                         | Dnmt3a                                                         | 2.815 | 0.016 | 1.457  | 0.012 | 1.713 | 0.008 | 1.471  | 0.031 |
| 1384804_at   | AI029751  | DNA methyltransferase 3A                                                                                                                                         | Dnmt3a                                                         | 1.481 | 0.821 | 1.386  | 0.102 | 0.814 | 0.205 | 1.445  | 0.056 |
| 1388182_at   | BE108911  | DNA primase, p49 subunit                                                                                                                                         | Prim1                                                          | 0.563 | 0.084 | 0.791  | 0.785 | 0.522 | 0.039 | 0.843  | 0.321 |
| 1384368_at   | AA900084  | DNA2 DNA replication helicase 2-like (yeast) (predicted)                                                                                                         | Dna21_predicted                                                | 0.483 | 0.094 | 0.539  | 0.060 | 0.534 | 0.010 | 0.540  | 0.001 |
| 1375758_at   | BF404935  | DNA2 DNA replication helicase 2-like (yeast) (predicted)                                                                                                         | Dna21_predicted                                                | 1.030 | 0.235 | 0.940  | 0.931 | 1.003 | 0.971 | 1.235  | 0.451 |
| 1376178_at   | BF403703  | DNA-damage inducible transcript 3                                                                                                                                | Ddit3                                                          | 1.810 | 0.023 | 1.954  | 0.081 | 1.417 | 0.082 | 1.671  | 0.017 |
| 1369590_a_at | NM_024134 | DNA-damage inducible transcript 3                                                                                                                                | Ddit3                                                          | 1.658 | 0.052 | 7.860  | 0.001 | 1.189 | 0.131 | 7.104  | 0.000 |
| 1368025_at   | NM_080906 | DNA-damage-inducible transcript 4                                                                                                                                | Ddit4                                                          | 1.568 | 0.210 | 3.356  | 0.000 | 1.632 | 0.065 | 3.060  | 0.006 |
| 1398819_at   | NM_022934 | DnaJ (Hsp40) homolog, subfamily A, member 1                                                                                                                      | Dnaja1                                                         | 0.977 | 0.893 | 1.361  | 0.004 | 1.057 | 0.368 | 1.119  | 0.122 |
| 1387780_at   | NM_032079 | DnaJ (Hsp40) homolog, subfamily A, member 2                                                                                                                      | Dnaja2                                                         | 0.789 | 0.456 | 1.712  | 0.008 | 0.795 | 0.335 | 1.674  | 0.004 |
| 1378392_at   | BG377107  | DnaJ (Hsp40) homolog, subfamily A, member 3                                                                                                                      | Dnaja3                                                         | 0.749 | 0.347 | 1.411  | 0.040 | 0.717 | 0.071 | 1.378  | 0.083 |
| 1389845_at   | BI282224  | DnaJ (Hsp40) homolog, subfamily A, member 3                                                                                                                      | Dnaja3                                                         | 0.761 | 0.492 | 1.401  | 0.003 | 0.621 | 0.016 | 1.232  | 0.016 |
| 1372103_at   | BM386931  | DnaJ (Hsp40) homolog, subfamily A, member 4                                                                                                                      | Dnaja4                                                         | 0.526 | 0.061 | 0.255  | 0.005 | 0.520 | 0.023 | 0.296  | 0.002 |
| 1398343_at   | AI104324  | DnaJ (Hsp40) homolog, subfamily A, member 4                                                                                                                      | Dnaja4                                                         | 0.873 | 0.274 | 1.019  | 0.871 | 0.884 | 0.474 | 0.919  | 0.484 |
| 1395572_at   | BF565278  | DnaJ (Hsp40) homolog, subfamily A, member 4                                                                                                                      | Dnaja4                                                         | 1.042 | 0.643 | 1.017  | 0.924 | 1.017 | 0.656 | 0.669  | 0.039 |
| 1388722_at   | AA945704  | DnaJ (Hsp40) homolog, subfamily B, member 1 (predicted)                                                                                                          | Dnajb1_predicted                                               | 0.614 | 0.075 | 2.580  | 0.017 | 0.682 | 0.106 | 1.706  | 0.119 |
| 1383302_at   | BM384926  | DnaJ (Hsp40) homolog, subfamily B, member 1 (predicted)                                                                                                          | Dnajb1_predicted                                               | 0.745 | 0.092 | 19.688 | 0.001 | 0.886 | 0.176 | 2.911  | 0.055 |
| 1389308_at   | BI295873  | DnaJ (Hsp40) homolog, subfamily B, member 11                                                                                                                     | Dnajb11                                                        | 0.603 | 0.145 | 1.353  | 0.032 | 0.834 | 0.483 | 1.293  | 0.056 |
| 1372722_at   | AI175031  | DnaJ (Hsp40) homolog, subfamily B, member 4                                                                                                                      | Dnajb4                                                         | 0.389 | 0.055 | 0.545  | 0.010 | 0.429 | 0.001 | 0.650  | 0.033 |
| 1378843_at   | AW528827  | DnaJ (Hsp40) homolog, subfamily B, member 6                                                                                                                      | Dnajb6                                                         | 1.386 | 0.162 | 1.215  | 0.534 | 1.053 | 0.567 | 1.546  | 0.096 |
| 1391422_at   | BE100486  | DnaJ (Hsp40) homolog, subfamily B, member 6                                                                                                                      | Dnajb6                                                         | 1.230 | 0.412 | 2.034  | 0.058 | 1.339 | 0.008 | 1.820  | 0.174 |
| 1382024_at   | BM383877  | DnaJ (Hsp40) homolog, subfamily B, member 6 /// similar to mDj4 (predicted) /// similar to DnaJ homolog subfamily B member 6 (Heat shock protein J2) (predicted) | Dnajb6 ///<br>RGD1562684_predicted ///<br>RGD1565241_predicted | 1.023 | 0.620 | 1.159  | 0.247 | 1.064 | 0.372 | 1.004  | 0.956 |
| 1387116_at   | NM_012699 | DnaJ (Hsp40) homolog, subfamily B, member 9                                                                                                                      | Dnajb9                                                         | 1.054 | 0.632 | 1.256  | 0.083 | 0.830 | 0.645 | 1.168  | 0.022 |
| 1392388_at   | BE112281  | DnaJ (Hsp40) homolog, subfamily C, member 1 (predicted)                                                                                                          | Dnajc1_predicted                                               | 1.055 | 0.088 | 0.825  | 0.085 | 0.576 | 0.012 | 0.962  | 0.403 |
| 1376079_at   | BI295806  | DnaJ (Hsp40) homolog, subfamily C, member 1 (predicted)                                                                                                          | Dnajc1_predicted                                               | 0.606 | 0.330 | 0.621  | 0.004 | 0.477 | 0.035 | 0.600  | 0.017 |
| 1389290_at   | AI172034  | DnaJ (Hsp40) homolog, subfamily C, member 10                                                                                                                     | Dnajc10                                                        | 0.801 | 0.035 | 0.562  | 0.028 | 0.948 | 0.517 | 0.700  | 0.045 |
| 1373813_at   | BM388610  | DnaJ (Hsp40) homolog, subfamily C, member 10                                                                                                                     | Dnajc10                                                        | 0.776 | 0.929 | 0.488  | 0.001 | 1.084 | 0.672 | 0.993  | 0.777 |
| 1372189_at   | AI411144  | DnaJ (Hsp40) homolog, subfamily C, member 13 (predicted)                                                                                                         | Dnajc13_predicted                                              | 1.250 | 0.039 | 0.850  | 0.031 | 1.527 | 0.147 | 1.004  | 0.957 |
| 1369714_at   | NM_053690 | DnaJ (Hsp40) homolog, subfamily C, member 14                                                                                                                     | Dnajc14                                                        | 1.755 | 0.053 | 1.700  | 0.805 | 1.730 | 0.108 | 1.482  | 0.511 |
| 1373064_at   | BM390416  | DnaJ (Hsp40) homolog, subfamily C, member 15 (predicted)                                                                                                         | Dnajc15_predicted                                              | 0.586 | 0.219 | 1.170  | 0.372 | 0.432 | 0.008 | 1.228  | 0.169 |
| 1373004_at   | AA964764  | DnaJ (Hsp40) homolog, subfamily C, member 2                                                                                                                      | Dnajc2                                                         | 0.993 | 0.983 | 1.567  | 0.104 | 0.693 | 0.059 | 1.024  | 0.880 |
| 1370073_at   | NM_022232 | DnaJ (Hsp40) homolog, subfamily C, member 3                                                                                                                      | Dnajc3                                                         | 0.844 | 0.248 | 0.882  | 0.214 | 0.778 | 0.111 | 0.878  | 0.196 |
| 1372428_at   | BG380252  | DnaJ (Hsp40) homolog, subfamily C, member 4                                                                                                                      | Dnajc4                                                         | 1.029 | 0.552 | 1.859  | 0.093 | 0.985 | 0.757 | 1.035  | 0.294 |
| 1369813_at   | U39320    | DnaJ (Hsp40) homolog, subfamily C, member 5                                                                                                                      | Dnajc5                                                         | 0.876 | 0.791 | 24.502 | 0.001 | 0.265 | 0.036 | 15.709 | 0.002 |
| 1377125_at   | AW523481  | DnaJ (Hsp40) homolog, subfamily C, member 6 (predicted)                                                                                                          | Dnajc6_predicted                                               | 0.587 | 0.001 | 0.456  | 0.001 | 0.587 | 0.001 | 0.591  | 0.004 |



|              |           |                                                                                                               |                   |       |       |       |       |        |       |        |       |
|--------------|-----------|---------------------------------------------------------------------------------------------------------------|-------------------|-------|-------|-------|-------|--------|-------|--------|-------|
| 1386648_at   | AW914996  | DnaJ (Hsp40) homolog, subfamily C, member 6 (predicted)                                                       | Dnajc6_predicted  | 0.624 | 0.008 | 0.356 | 0.004 | 0.638  | 0.004 | 0.485  | 0.002 |
| 1374744_at   | BF392285  | DnaJ (Hsp40) homolog, subfamily C, member 7                                                                   | Dnajc7            | 0.938 | 0.129 | 1.055 | 0.351 | 0.523  | 0.152 | 0.916  | 0.386 |
| 1371784_at   | BI285682  | DnaJ (Hsp40) homolog, subfamily C, member 7                                                                   | Dnajc7            | 1.007 | 0.543 | 1.016 | 0.500 | 1.406  | 0.006 | 0.813  | 0.555 |
| 1378781_at   | AI712400  | DnaJ (Hsp40) homolog, subfamily C, member 8                                                                   | Dnajc8            | 1.655 | 0.105 | 1.091 | 0.047 | 1.132  | 0.423 | 1.073  | 0.814 |
| 1367492_at   | AI227785  | DnaJ (Hsp40) homolog, subfamily C, member 8                                                                   | Dnajc8            | 0.967 | 0.477 | 1.259 | 0.031 | 1.163  | 0.381 | 1.306  | 0.071 |
| 1383181_at   | AI704947  | DnaJ (Hsp40) homolog, subfamily C, member 9 (predicted)                                                       | Dnajc9_predicted  | 0.458 | 0.013 | 0.783 | 0.061 | 0.279  | 0.010 | 0.920  | 0.054 |
| 1368664_at   | AI138041  | dnaj-like protein                                                                                             | LOC56764          | 1.549 | 0.416 | 0.988 | 0.971 | 1.060  | 0.996 | 0.950  | 0.989 |
| 1383630_at   | BG377464  | docking protein 3 (predicted)                                                                                 | Dok3_predicted    | 1.002 | 0.283 | 1.005 | 0.933 | 0.767  | 0.206 | 1.060  | 0.771 |
| 1372300_at   | BI288838  | docking protein 4 (predicted)                                                                                 | Dok4_predicted    | 0.906 | 0.392 | 0.987 | 0.900 | 0.970  | 0.331 | 0.989  | 0.893 |
| 1380004_at   | BG373440  | Dodecenoyl-coenzyme A delta isomerase                                                                         | Dci               | 1.228 | 0.250 | 0.506 | 0.128 | 1.301  | 0.243 | 1.189  | 0.747 |
| 1367659_s_at | NM_017306 | dodecenoyl-coenzyme A delta isomerase                                                                         | Dci               | 1.266 | 0.942 | 0.858 | 0.262 | 1.581  | 0.084 | 0.940  | 0.878 |
| 1377593_at   | BI284172  | dolichol-phosphate (beta-D) mannosyltransferase 1 (predicted)                                                 | Dpm1_predicted    | 0.511 | 0.128 | 0.648 | 0.005 | 0.510  | 0.007 | 0.681  | 0.018 |
| 1391372_at   | BF405555  | Dolichol-phosphate (beta-D) mannosyltransferase 1 (predicted)                                                 | Dpm1_predicted    | 0.798 | 0.355 | 1.475 | 0.122 | 1.087  | 0.741 | 1.060  | 0.223 |
| 1367751_at   | NM_019252 | dolichol-phosphate (beta-D) mannosyltransferase 2                                                             | Dpm2              | 0.531 | 0.333 | 0.671 | 0.013 | 0.458  | 0.045 | 0.890  | 0.201 |
| 1372247_at   | BF282907  | dolichyl-di-phosphooligosaccharide-protein glycotransferase (predicted)                                       | Ddost_predicted   | 0.749 | 0.477 | 0.719 | 0.004 | 0.786  | 0.269 | 0.693  | 0.007 |
| 1372270_at   | BM391270  | dolichyl-phosphate (UDP-N-acetylglucosamine) N-acetylglucosaminophosphotransferase 1 (GlcNAc-1-P transferase) | H2afx             | 1.069 | 0.530 | 1.200 | 0.025 | 1.307  | 0.484 | 1.198  | 0.011 |
| 1368064_a_at | U31884    | dopa decarboxylase                                                                                            | Ddc               | 0.836 | 0.142 | 0.166 | 0.001 | 0.652  | 0.050 | 0.139  | 0.008 |
| 1368479_at   | M35077    | dopamine receptor D1A                                                                                         | Drd1a             | 1.033 | 0.928 | 1.101 | 0.170 | 1.720  | 0.070 | 1.140  | 0.067 |
| 1374651_at   | BM386987  | dopey family member 2 (predicted)                                                                             | Dopey2_predicted  | 0.755 | 0.186 | 0.402 | 0.001 | 0.585  | 0.015 | 0.312  | 0.012 |
| 1388589_at   | BG381046  | DOT1-like, histone H3 methyltransferase ( <i>S. cerevisiae</i> ) (predicted)                                  | Dot11_predicted   | 1.289 | 0.076 | 1.672 | 0.167 | 1.041  | 0.684 | 1.457  | 0.194 |
| 1369686_at   | U78857    | double cortin and calcium/calmodulin-dependent protein kinase-like 1                                          | Dcamk11           | 0.310 | 0.005 | 0.212 | 0.001 | 0.361  | 0.021 | 0.148  | 0.000 |
| 1374966_at   | BE109057  | doublecortin                                                                                                  | Dcx               | 0.688 | 0.532 | 0.115 | 0.000 | 0.980  | 0.346 | 0.112  | 0.016 |
| 1389066_at   | BI274408  | Down syndrome critical region gene 1-like 1                                                                   | Dscr111           | 0.084 | 0.001 | 0.092 | 0.020 | 0.157  | 0.037 | 0.143  | 0.002 |
| 1396528_at   | BF404786  | Down syndrome critical region gene 1-like 1                                                                   | Dscr111           | 0.726 | 0.214 | 0.148 | 0.003 | 0.523  | 0.064 | 0.242  | 0.007 |
| 1374235_at   | AI138048  | Down syndrome critical region gene 1-like 1                                                                   | Dscr111           | 0.766 | 0.261 | 0.676 | 0.077 | 0.454  | 0.017 | 0.658  | 0.000 |
| 1398560_at   | AW530670  | Down syndrome critical region gene 1-like 1                                                                   | Dscr111           | 0.996 | 0.912 | 0.553 | 0.066 | 1.324  | 0.213 | 0.572  | 0.102 |
| 1396706_at   | BF398967  | Down syndrome critical region gene 1-like 1                                                                   | Dscr111           | 1.030 | 0.963 | 0.590 | 0.154 | 1.061  | 0.562 | 0.877  | 0.417 |
| 1388686_at   | AI170193  | Down syndrome critical region homolog 1 (human)                                                               | Dscr1             | 0.999 | 0.991 | 1.141 | 0.695 | 1.016  | 0.362 | 1.675  | 0.003 |
| 1371385_at   | BF407158  | Down syndrome critical region homolog 2 (human) (predicted)                                                   | Dscr2_predicted   | 0.710 | 0.157 | 0.923 | 0.014 | 0.555  | 0.021 | 0.924  | 0.072 |
| 1391648_at   | BF545697  | Down syndrome critical region homolog 6 (human) (predicted)                                                   | Dscr6_predicted   | 0.174 | 0.005 | 0.089 | 0.010 | 0.241  | 0.095 | 0.190  | 0.056 |
| 1372453_at   | AI012637  | down-regulator of transcription 1                                                                             | Dr1               | 0.655 | 0.009 | 0.602 | 0.009 | 0.726  | 0.053 | 0.605  | 0.043 |
| 1384005_at   | BG662895  | down-regulator of transcription 1                                                                             | Dr1               | 0.897 | 0.202 | 0.990 | 0.131 | 0.999  | 0.969 | 0.858  | 0.342 |
| 1376026_at   | AI178243  | downstream neighbor of SON                                                                                    | Donson            | 7.996 | 0.007 | 3.972 | 0.005 | 33.425 | 0.000 | 14.901 | 0.004 |
| 1390272_at   | BM386608  | DPH5 homolog ( <i>S. cerevisiae</i> )                                                                         | Dph5              | 0.861 | 0.603 | 2.219 | 0.015 | 0.862  | 0.349 | 2.218  | 0.029 |
| 1389483_at   | AI408686  | Dpy-19-like 1 ( <i>C. elegans</i> ) (predicted)                                                               | Dpy1911_predicted | 0.519 | 0.000 | 0.617 | 0.002 | 0.587  | 0.004 | 0.666  | 0.088 |
| 1375174_at   | BI296653  | Dpy-19-like 1 ( <i>C. elegans</i> ) (predicted)                                                               | Dpy1911_predicted | 0.728 | 0.974 | 0.971 | 0.860 | 0.990  | 0.973 | 0.908  | 0.402 |
| 1371383_at   | BI296428  | Dr1 associated protein 1 (negative cofactor 2 alpha) (predicted)                                              | Drap1_predicted   | 1.031 | 0.906 | 1.250 | 0.401 | 1.249  | 0.018 | 1.173  | 0.067 |
| 1368274_at   | NM_031352 | drebrin-like                                                                                                  | Dbnl              | 3.249 | 0.006 | 1.646 | 0.099 | 4.082  | 0.000 | 1.985  | 0.029 |
| 1373460_at   | AI178790  | D-serine modulator-1                                                                                          | Dsm-1             | 1.271 | 0.452 | 0.717 | 0.124 | 1.332  | 0.328 | 0.338  | 0.068 |
| 1378377_at   | BF552453  | dual adaptor for phosphotyrosine and 3-phosphoinositides 1 (predicted)                                        | Dapp1_predicted   | 1.001 | 0.954 | 2.497 | 0.032 | 1.333  | 0.165 | 1.366  | 0.448 |
| 1387414_at   | NM_024141 | dual oxidase 2                                                                                                | Duox2             | 1.350 | 0.190 | 2.101 | 0.186 | 1.002  | 0.974 | 0.997  | 0.978 |
| 1368146_at   | U02553    | dual specificity phosphatase 1                                                                                | Dusp1             | 4.539 | 0.001 | 7.228 | 0.000 | 2.852  | 0.027 | 4.757  | 0.000 |
| 1394028_at   | AW916472  | dual specificity phosphatase 10 (predicted)                                                                   | Dusp10_predicted  | 2.275 | 0.057 | 0.459 | 0.003 | 1.237  | 0.421 | 0.441  | 0.043 |
| 1376576_at   | BM387750  | dual specificity phosphatase 11 (RNA/RNP complex 1-interacting)                                               | Dusp11            | 1.053 | 0.713 | 1.803 | 0.042 | 1.369  | 0.033 | 1.384  | 0.034 |
| 1387457_at   | NM_022248 | dual specificity phosphatase 12                                                                               | Dusp12            | 1.002 | 0.949 | 1.218 | 0.253 | 1.053  | 0.703 | 0.998  | 0.778 |
| 1375967_a_at | AI172067  | dual specificity phosphatase 22 (predicted)                                                                   | Dusp22_predicted  | 0.767 | 0.159 | 0.934 | 0.439 | 0.980  | 0.389 | 0.964  | 0.670 |
| 1374379_at   | BF396810  | Dual specificity phosphatase 23 (predicted)                                                                   | Dusp23_predicted  | 0.319 | 0.255 | 0.492 | 0.008 | 0.342  | 0.123 | 0.533  | 0.087 |
| 1375475_at   | BE111304  | Dual specificity phosphatase 5                                                                                | Dusp5             | 0.216 | 0.041 | 0.980 | 0.878 | 0.159  | 0.035 | 0.979  | 0.891 |
| 1368124_at   | NM_133578 | dual specificity phosphatase 5                                                                                | Dusp5             | 0.462 | 0.136 | 0.285 | 0.001 | 0.225  | 0.004 | 0.327  | 0.032 |
| 1382778_at   | AI231350  | Dual specificity phosphatase 6                                                                                | Dusp6             | 0.736 | 0.289 | 1.081 | 0.595 | 1.416  | 0.643 | 1.074  | 0.523 |
| 1377064_at   | AI602811  | dual specificity phosphatase 6                                                                                | Dusp6             | 0.688 | 0.566 | 1.001 | 0.678 | 1.265  | 0.553 | 0.998  | 0.441 |
| 1377992_at   | AI111775  | Dual specificity phosphatase 7                                                                                | Dusp7             | 0.446 | 0.285 | 0.913 | 0.869 | 0.402  | 0.035 | 0.578  | 0.027 |
| 1386396_at   | AW528387  | dual specificity phosphatase 8 (predicted)                                                                    | Dusp8_predicted   | 1.576 | 0.001 | 1.485 | 0.055 | 1.650  | 0.009 | 1.408  | 0.458 |
| 1373340_at   | AI179321  | dual specificity phosphatase 9                                                                                | Dusp9             | 0.999 | 0.966 | 1.370 | 0.058 | 0.999  | 0.998 | 1.239  | 0.054 |
| 1370183_at   | BI303285  | dual-specificity tyrosine-(Y)-phosphorylation regulated kinase 1A                                             | Dyrk1a            | 1.284 | 0.375 | 2.160 | 0.005 | 1.141  | 0.576 | 2.013  | 0.048 |
| 1383601_at   | BI295614  | DUF729 domain containing 1 (predicted)                                                                        | Dufd1_predicted   | 1.561 | 0.179 | 1.901 | 0.072 | 2.259  | 0.060 | 1.017  | 0.823 |
| 1381555_at   | BI288686  | DUF729 domain containing 1 (predicted)                                                                        | Dufd1_predicted   | 1.716 | 0.283 | 1.435 | 0.260 | 2.342  | 0.051 | 1.035  | 0.925 |
| 1375299_at   | AI103331  | Dullard homolog ( <i>Xenopus laevis</i> )                                                                     | Dullard           | 0.903 | 0.514 | 0.978 | 0.258 | 0.922  | 0.075 | 0.973  | 0.456 |
| 1373502_at   | BM389188  | Dymeclin (predicted)                                                                                          | Dym_predicted     | 0.327 | 0.164 | 1.048 | 0.622 | 0.203  | 0.010 | 0.844  | 0.195 |
| 1380042_at   | AA964012  | Dynactin 1                                                                                                    | Dctn1             | 0.318 | 0.008 | 0.980 | 0.789 | 0.706  | 0.105 | 0.739  | 0.604 |

|              |           |                                                                                       |                     |       |       |        |       |       |       |        |       |
|--------------|-----------|---------------------------------------------------------------------------------------|---------------------|-------|-------|--------|-------|-------|-------|--------|-------|
| 1367848_at   | NM_024130 | dynactin 1                                                                            | Dctn1               | 0.459 | 0.033 | 0.714  | 0.025 | 0.356 | 0.023 | 0.779  | 0.038 |
| 1371834_at   | BF283695  | dynactin 2                                                                            | Dctn2               | 0.781 | 0.031 | 1.071  | 0.223 | 0.931 | 0.826 | 0.897  | 0.220 |
| 1398900_at   | AA893211  | dynactin 3 (predicted)                                                                | Dctn3_predicted     | 0.814 | 0.363 | 0.780  | 0.084 | 0.542 | 0.010 | 0.761  | 0.357 |
| 1387236_at   | NM_053404 | dynactin 4                                                                            | Dctn4               | 2.110 | 0.007 | 2.467  | 0.002 | 1.384 | 0.067 | 2.125  | 0.051 |
| 1368537_at   | AI045623  | dynactin 4                                                                            | Dctn4               | 1.518 | 0.236 | 1.321  | 0.645 | 1.156 | 0.995 | 0.602  | 0.077 |
| 1373441_at   | BI296970  | dynactin 5                                                                            | Dctn5               | 1.268 | 0.042 | 0.866  | 0.808 | 1.110 | 0.154 | 1.062  | 0.333 |
| 1371533_at   | BI282273  | dynactin 6 (predicted)                                                                | Dctn6_predicted     | 0.677 | 0.089 | 1.130  | 0.213 | 0.659 | 0.016 | 1.159  | 0.139 |
| 1368292_at   | NM_080689 | dynamamin 1                                                                           | Dnm1                | 0.996 | 0.976 | 0.946  | 0.746 | 1.000 | 0.999 | 0.802  | 0.723 |
| 1386460_x_at | AI237251  | dynamamin 1-like                                                                      | Dnm1l               | 0.845 | 0.136 | 0.873  | 0.038 | 0.912 | 0.228 | 0.855  | 0.040 |
| 1394227_at   | AI237251  | dynamamin 1-like                                                                      | Dnm1l               | 0.846 | 0.282 | 0.920  | 0.760 | 0.839 | 0.279 | 0.939  | 0.485 |
| 1369220_at   | NM_053655 | dynamamin 1-like                                                                      | Dnm1l               | 1.163 | 0.315 | 0.711  | 0.021 | 0.837 | 0.305 | 0.459  | 0.038 |
| 1388022_a_at | AF132727  | dynamamin 1-like                                                                      | Dnm1l               | 0.464 | 0.322 | 1.154  | 0.846 | 0.458 | 0.925 | 0.853  | 0.196 |
| 1383183_at   | AI072458  | dynamamin 1-like                                                                      | Dnm1l               | 0.563 | 0.408 | 0.365  | 0.187 | 0.375 | 0.126 | 0.527  | 0.067 |
| 1396562_at   | BF409832  | Dynamamin 2                                                                           | Dnm2                | 0.914 | 0.547 | 1.731  | 0.152 | 0.904 | 0.781 | 1.114  | 0.316 |
| 1398803_at   | NM_019226 | dynein cytoplasmic 1 heavy chain 1                                                    | Dync1h1             | 1.391 | 0.086 | 1.353  | 0.011 | 1.433 | 0.083 | 1.628  | 0.012 |
| 1387025_at   | NM_019234 | dynein cytoplasmic 1 intermediate chain 1                                             | Dync1i1             | 0.684 | 0.344 | 0.978  | 0.771 | 0.393 | 0.017 | 1.100  | 0.655 |
| 1399147_at   | AI111975  | Dynein cytoplasmic 1 light intermediate chain 1                                       | Dync1li1            | 2.294 | 0.714 | 1.016  | 0.731 | 1.604 | 0.287 | 0.999  | 0.896 |
| 1370576_at   | AF181992  | dynein cytoplasmic 1 light intermediate chain 1                                       | Dync1li1            | 1.118 | 0.994 | 0.904  | 0.325 | 1.029 | 0.995 | 0.872  | 0.062 |
| 1374573_at   | BE113181  | dynein cytoplasmic 2 light intermediate chain 1                                       | Dync2li1            | 0.983 | 0.985 | 1.317  | 0.759 | 1.003 | 0.090 | 0.975  | 0.994 |
| 1369976_at   | NM_053319 | dynein light chain LC8-type 1                                                         | Dynll1              | 0.540 | 0.297 | 0.509  | 0.024 | 0.479 | 0.003 | 0.715  | 0.150 |
| 1372612_at   | BG372973  | dynein light chain LC8-type 2                                                         | Dynll2              | 0.739 | 0.013 | 0.816  | 0.003 | 0.822 | 0.006 | 0.821  | 0.002 |
| 1387782_at   | NM_080697 | dynein light chain LC8-type 2                                                         | Dynll2              | 0.689 | 0.140 | 1.614  | 0.060 | 0.436 | 0.164 | 1.283  | 0.110 |
| 1372514_s_at | AA892303  | dynein, axonemal, light chain 4                                                       | Dnalc4              | 0.618 | 0.052 | 0.845  | 0.350 | 0.628 | 0.057 | 0.588  | 0.190 |
| 1388785_at   | AA892303  | dynein, axonemal, light chain 4                                                       | Dnalc4              | 1.082 | 0.759 | 1.254  | 0.660 | 0.900 | 0.782 | 1.353  | 0.015 |
| 1368676_at   | NM_023024 | dynein, cytoplasmic, heavy polypeptide 2 /// hypothetical gene supported by NM_023024 | Dnch2 /// LOC497827 | 1.137 | 0.881 | 0.477  | 0.041 | 1.641 | 0.952 | 0.513  | 0.046 |
| 1386952_a_at | NM_053880 | dynein, cytoplasmic, intermediate chain 2                                             | Dncic2              | 1.196 | 0.324 | 1.420  | 0.034 | 1.124 | 0.413 | 1.273  | 0.003 |
| 1370179_at   | AI102949  | dynein, cytoplasmic, light chain 2A                                                   | Dncl2a              | 0.817 | 0.449 | 0.865  | 0.322 | 0.747 | 0.040 | 0.947  | 0.701 |
| 1368402_at   | NM_031026 | dynein, cytoplasmic, light intermediate polypeptide 2                                 | Dncli2              | 0.979 | 0.527 | 0.592  | 0.004 | 0.845 | 0.063 | 0.666  | 0.002 |
| 1373256_at   | BM391119  | Dynein-like protein 2                                                                 | DLP2                | 0.871 | 0.381 | 0.757  | 0.067 | 0.874 | 0.673 | 0.645  | 0.033 |
| 1385559_at   | BF562977  | Dynein-like protein 2                                                                 | DLP2                | 0.997 | 0.550 | 1.736  | 0.023 | 1.063 | 0.832 | 0.999  | 0.999 |
| 1368649_at   | NM_133419 | dyskeratosis congenita 1, dyskerin                                                    | Dkc1                | 0.789 | 0.677 | 2.092  | 0.061 | 2.105 | 0.280 | 1.831  | 0.170 |
| 1375357_at   | BE112237  | dystonia 1                                                                            | Dyt1                | 0.521 | 0.270 | 0.574  | 0.027 | 0.533 | 0.082 | 0.718  | 0.010 |
| 1398000_at   | BF394082  | Dystonin (predicted)                                                                  | Dst_predicted       | 1.920 | 0.014 | 2.017  | 0.666 | 1.910 | 0.026 | 2.148  | 0.384 |
| 1376130_a_at | BM390663  | dystrobrevin, beta                                                                    | Dtnb                | 1.083 | 0.254 | 1.042  | 0.398 | 1.405 | 0.057 | 1.511  | 0.348 |
| 1371430_at   | AW251326  | dystroglycan 1                                                                        | Dag1                | 0.767 | 0.033 | 0.516  | 0.015 | 0.633 | 0.057 | 0.530  | 0.021 |
| 1371429_at   | BF281192  | dystroglycan 1                                                                        | Dag1                | 0.569 | 0.456 | 0.434  | 0.004 | 0.336 | 0.002 | 0.564  | 0.002 |
| 1395970_at   | BI297496  | Dystrophia myotonica-containing WD repeat motif                                       | Dmwd                | 1.112 | 0.139 | 1.072  | 0.968 | 0.962 | 0.784 | 1.183  | 0.864 |
| 1373915_at   | AI044427  | dystrophia myotonica-protein kinase (predicted)                                       | Dmpk_predicted      | 1.164 | 0.313 | 0.485  | 0.019 | 1.035 | 0.714 | 0.594  | 0.111 |
| 1373916_at   | AI237356  | E1A binding protein p300                                                              | Ep300               | 1.339 | 0.051 | 0.883  | 0.005 | 1.307 | 0.042 | 1.025  | 0.302 |
| 1378682_at   | BF390772  | E1A binding protein p300                                                              | Ep300               | 0.834 | 0.590 | 0.965  | 0.554 | 0.918 | 0.176 | 0.996  | 0.903 |
| 1369307_at   | NM_133403 | E1A binding protein p300                                                              | Ep300               | 1.004 | 0.984 | 0.922  | 0.268 | 1.005 | 0.933 | 0.808  | 0.500 |
| 1388992_at   | AI169305  | E1A binding protein p400                                                              | Ep400               | 1.890 | 0.039 | 1.577  | 0.001 | 1.883 | 0.010 | 1.623  | 0.003 |
| 1388154_at   | U31668    | E2F transcription factor 5                                                            | E2f5                | 0.973 | 0.826 | 0.677  | 0.080 | 1.258 | 0.223 | 1.333  | 0.066 |
| 1374137_at   | AA818055  | E74-like factor 1                                                                     | Elf1                | 4.713 | 0.020 | 1.663  | 0.198 | 4.535 | 0.019 | 1.783  | 0.031 |
| 1382637_at   | AI137223  | E74-like factor 2                                                                     | Elf2                | 0.997 | 0.979 | 1.546  | 0.211 | 1.009 | 0.986 | 1.000  | 0.999 |
| 1389130_at   | AW525131  | E74-like factor 2                                                                     | Elf2                | 1.105 | 0.994 | 1.017  | 0.282 | 0.915 | 0.361 | 1.094  | 0.492 |
| 1374119_at   | BI279615  | E74-like factor 3                                                                     | Elf3                | 2.821 | 0.007 | 4.960  | 0.009 | 1.523 | 0.347 | 3.626  | 0.000 |
| 1394709_at   | AI406967  | Early B-cell factor 1                                                                 | Ebf1                | 1.238 | 0.996 | 1.978  | 0.320 | 0.971 | 0.939 | 1.087  | 0.909 |
| 1394985_at   | BI294752  | early endosome antigen 1 (predicted)                                                  | Eea1_predicted      | 1.273 | 0.037 | 1.031  | 0.145 | 1.360 | 0.239 | 1.113  | 0.496 |
| 1368321_at   | NM_012551 | early growth response 1                                                               | Egr1                | 5.955 | 0.005 | 0.221  | 0.004 | 2.809 | 0.012 | 0.278  | 0.010 |
| 1387306_a_at | NM_053633 | early growth response 2                                                               | Egr2                | 1.425 | 0.177 | 0.906  | 0.779 | 1.053 | 0.473 | 0.848  | 0.807 |
| 1392791_at   | AA964492  | Early growth response 3                                                               | Egr3                | 1.001 | 0.402 | 1.692  | 0.969 | 1.043 | 0.778 | 1.013  | 0.945 |
| 1388397_at   | BI281160  | EBNA1 binding protein 2                                                               | Ebna1bp2            | 0.574 | 0.297 | 2.044  | 0.004 | 0.333 | 0.028 | 1.866  | 0.006 |
| 1370544_at   | AF335571  | echinoderm microtubule associated protein like 2                                      | Eml2                | 1.324 | 0.036 | 0.829  | 0.195 | 1.945 | 0.011 | 1.034  | 0.496 |
| 1373527_at   | BI275677  | echinoderm microtubule associated protein like 3 (predicted)                          | Eml3_predicted      | 1.081 | 0.512 | 0.763  | 0.061 | 1.465 | 0.073 | 0.490  | 0.038 |
| 1376082_at   | BE107033  | ecotropic viral integration site 1 (predicted)                                        | Evi1_predicted      | 1.148 | 0.533 | 1.061  | 0.452 | 1.198 | 0.458 | 0.854  | 0.313 |
| 1388666_at   | AI179988  | ectodermal-neural cortex 1                                                            | Enc1                | 5.162 | 0.004 | 7.619  | 0.001 | 3.104 | 0.012 | 4.947  | 0.003 |
| 1382710_at   | AA997271  | Ectodermal-neural cortex 1                                                            | Enc1                | 2.570 | 0.007 | 5.514  | 0.010 | 1.065 | 0.891 | 2.338  | 0.053 |
| 1384687_at   | AI071307  | ectodermal-neural cortex 1                                                            | Enc1                | 2.128 | 0.078 | 18.570 | 0.001 | 2.418 | 0.091 | 13.859 | 0.001 |
| 1370845_at   | BI288690  | ectonucleoside triphosphate diphosphohydrolase 2                                      | Entpd2              | 1.192 | 0.266 | 4.093  | 0.000 | 1.786 | 0.066 | 2.656  | 0.001 |
| 1384866_at   | AI070096  | ectonucleoside triphosphate diphosphohydrolase 3                                      | Entpd3              | 1.143 | 0.087 | 0.682  | 0.011 | 1.118 | 0.067 | 0.771  | 0.001 |

|            |           |                                                                                                                         |                      |       |       |       |       |        |       |       |       |
|------------|-----------|-------------------------------------------------------------------------------------------------------------------------|----------------------|-------|-------|-------|-------|--------|-------|-------|-------|
| 1375728_at | AI511102  | Ectonucleoside triphosphate diphosphohydrolase 4 (predicted)                                                            | Entpd4_predicted     | 0.895 | 0.966 | 1.283 | 0.042 | 0.832  | 0.665 | 0.999 | 0.989 |
| 1382434_at | AI059015  | ectonucleoside triphosphate diphosphohydrolase 5                                                                        | Entpd5               | 0.665 | 0.015 | 1.482 | 0.163 | 0.482  | 0.207 | 1.133 | 0.467 |
| 1368536_at | NM_057104 | ectonucleotide pyrophosphatase/phosphodiesterase 2                                                                      | Enpp2                | 0.792 | 0.099 | 0.409 | 0.006 | 2.954  | 0.053 | 0.513 | 0.080 |
| 1373912_at | AI170859  | Ectonucleotide pyrophosphatase/phosphodiesterase 4 (predicted)                                                          | Enpp4_predicted      | 3.341 | 0.005 | 1.530 | 0.354 | 10.765 | 0.002 | 2.785 | 0.019 |
| 1388926_at | AI409048  | Ectonucleotide pyrophosphatase/phosphodiesterase 5                                                                      | Enpp5                | 1.163 | 0.482 | 0.788 | 0.466 | 1.178  | 0.104 | 1.197 | 0.150 |
| 1374388_at | AI408294  | EF hand domain containing 2                                                                                             | Efhd2                | 1.011 | 0.811 | 0.995 | 0.963 | 0.987  | 0.726 | 1.044 | 0.409 |
| 1373196_at | BF404514  | EF hand domain family, member A2                                                                                        | Efha2                | 0.544 | 0.005 | 0.325 | 0.009 | 0.811  | 0.271 | 0.391 | 0.046 |
| 1393240_at | AI112299  | EGF-containing fibulin-like extracellular matrix protein 2                                                              | Efemp2               | 0.999 | 0.671 | 0.984 | 0.984 | 1.000  | 0.919 | 1.023 | 0.995 |
| 1371023_at | AW524873  | EGF-like-domain, multiple 4                                                                                             | Egfl4                | 0.750 | 0.708 | 0.557 | 0.006 | 0.979  | 0.926 | 0.641 | 0.032 |
| 1393335_at | BF418373  | EGF-like-domain, multiple 6                                                                                             | Egfl6                | 1.007 | 0.783 | 0.985 | 0.250 | 0.993  | 0.987 | 1.102 | 0.252 |
| 1389207_at | BI282122  | EGL nine homolog 1 (C. elegans)                                                                                         | Egln1                | 0.869 | 0.066 | 2.700 | 0.001 | 0.682  | 0.917 | 2.948 | 0.000 |
| 1373794_at | BE329050  | EGL nine homolog 2 (C. elegans)                                                                                         | Egln2                | 1.203 | 0.247 | 0.802 | 0.152 | 1.207  | 0.411 | 0.822 | 0.076 |
| 1377665_at | AA998979  | EH-domain containing 1                                                                                                  | Ehd1                 | 1.537 | 0.002 | 1.002 | 0.602 | 1.816  | 0.049 | 1.155 | 0.466 |
| 1372317_at | AI177867  | EH-domain containing 1                                                                                                  | Ehd1                 | 1.006 | 0.965 | 1.493 | 0.183 | 0.999  | 0.859 | 1.063 | 0.632 |
| 1374399_at | AA801107  | EH-domain containing 4                                                                                                  | Ehd4                 | 4.559 | 0.006 | 6.630 | 0.000 | 5.430  | 0.001 | 5.911 | 0.007 |
| 1372106_at | BI284307  | EH-domain containing 4                                                                                                  | Ehd4                 | 7.197 | 0.011 | 2.537 | 0.116 | 10.089 | 0.000 | 1.800 | 0.061 |
| 1375739_at | BF395171  | EH-domain containing 4                                                                                                  | Ehd4                 | 3.113 | 0.124 | 6.175 | 0.006 | 3.516  | 0.002 | 4.715 | 0.007 |
| 1374107_at | AI229668  | elaC homolog 2 (E. coli)                                                                                                | Ela2                 | 0.630 | 0.072 | 0.977 | 0.306 | 0.569  | 0.066 | 1.128 | 0.800 |
| 1387471_at | NM_012553 | elastase 2                                                                                                              | Ela2                 | 1.110 | 0.954 | 0.707 | 0.496 | 1.076  | 0.964 | 0.702 | 0.401 |
| 1372325_at | BI303596  | elastin microfibril interfacier 1 (predicted)                                                                           | Emilin1_predicted    | 0.953 | 0.434 | 1.053 | 0.974 | 1.150  | 0.334 | 1.056 | 0.999 |
| 1391006_at | AI235353  | ELAV (embryonic lethal, abnormal vision, Drosophila)-like 1 (Hu antigen R) (predicted)                                  | Elavl1_predicted     | 1.178 | 0.042 | 1.719 | 0.061 | 1.056  | 0.169 | 1.425 | 0.113 |
| 1382952_at | C06972    | ELAV (embryonic lethal, abnormal vision, Drosophila)-like 1 (Hu antigen R) (predicted)                                  | Elavl1_predicted     | 0.682 | 0.088 | 1.113 | 0.107 | 0.598  | 0.036 | 1.083 | 0.191 |
| 1375892_at | BF559812  | ELAV (embryonic lethal, abnormal vision, Drosophila)-like 1 (Hu antigen R) (predicted)                                  | Elavl1_predicted     | 1.344 | 0.475 | 1.180 | 0.513 | 1.227  | 0.831 | 1.001 | 0.525 |
| 1391743_at | BE104552  | ELAV (embryonic lethal, abnormal vision, Drosophila)-like 1 (Hu antigen R) (predicted)                                  | Elavl1_predicted     | 0.921 | 0.550 | 1.028 | 0.379 | 0.810  | 0.217 | 0.971 | 0.099 |
| 1393188_at | BF548232  | ELAV (embryonic lethal, abnormal vision, Drosophila)-like 1 (Hu antigen R) (predicted)                                  | Elavl1_predicted     | 1.027 | 0.883 | 1.169 | 0.706 | 0.704  | 0.078 | 0.971 | 0.104 |
| 1383736_at | AI145457  | ELAV (embryonic lethal, abnormal vision, Drosophila)-like 2 (Hu antigen B) /// hypothetical gene supported by NM_173309 | Elavl2 /// LOC497806 | 0.935 | 0.962 | 1.306 | 0.053 | 1.374  | 0.050 | 1.484 | 0.018 |
| 1397319_at | BF542311  | Electron transferring flavoprotein, alpha polypeptide                                                                   | Etfa                 | 1.105 | 0.327 | 1.088 | 0.305 | 1.281  | 0.412 | 1.111 | 0.354 |
| 1371253_at | AA942749  | electron transferring flavoprotein, alpha polypeptide                                                                   | Etfa                 | 0.962 | 0.364 | 1.149 | 0.964 | 0.922  | 0.642 | 1.208 | 0.270 |
| 1388358_at | AW252650  | electron-transfer-flavoprotein, beta polypeptide                                                                        | Etfb                 | 0.548 | 0.257 | 0.591 | 0.058 | 0.497  | 0.004 | 0.423 | 0.134 |
| 1371519_at | AA851258  | electron-transferring-flavoprotein dehydrogenase                                                                        | Etfdh                | 0.542 | 0.196 | 0.751 | 0.005 | 0.489  | 0.029 | 0.705 | 0.027 |
| 1385063_at | BG377323  | ELK1, member of ETS oncogene family                                                                                     | Elk1                 | 1.611 | 0.098 | 0.503 | 0.041 | 0.977  | 0.983 | 0.715 | 0.425 |
| 1374797_at | BM391920  | ELL associated factor 1 (predicted)                                                                                     | Eaf1_predicted       | 1.065 | 0.596 | 2.453 | 0.000 | 1.049  | 0.595 | 2.464 | 0.008 |
| 1371515_at | AI100773  | Elongation factor 1 homolog (ELF1, S. cerevisiae) (predicted)                                                           | Elof1_predicted      | 0.857 | 0.798 | 1.145 | 0.725 | 0.713  | 0.037 | 1.074 | 0.087 |
| 1388714_at | AI008458  | elongation factor RNA polymerase II (predicted)                                                                         | Ell_predicted        | 0.932 | 0.421 | 2.480 | 0.002 | 1.388  | 0.160 | 1.903 | 0.012 |
| 1389680_at | BI291626  | elongation factor RNA polymerase II 2                                                                                   | Ell2                 | 0.759 | 0.903 | 1.010 | 0.860 | 0.658  | 0.042 | 0.882 | 0.115 |
| 1392920_at | BE109672  | Elongation factor RNA polymerase II-like 3                                                                              | Ell3                 | 1.032 | 0.155 | 1.195 | 0.936 | 1.364  | 0.074 | 1.049 | 0.230 |
| 1371698_at | BF282614  | elongation factor Tu GTP binding domain containing 2                                                                    | Eftud2               | 0.831 | 0.981 | 0.646 | 0.950 | 0.509  | 0.124 | 1.599 | 0.159 |
| 1391534_at | BG666735  | elongation of very long chain fatty acids (FEN1/Elo2, SUR4/Elo3, yeast)-like 2 (predicted)                              | Elov12_predicted     | 0.380 | 0.018 | 0.337 | 0.000 | 0.362  | 0.012 | 0.394 | 0.027 |
| 1377729_at | BG668988  | elongation of very long chain fatty acids (FEN1/Elo2, SUR4/Elo3, yeast)-like 4 (predicted)                              | Elov14_predicted     | 1.271 | 0.078 | 0.621 | 0.056 | 0.662  | 0.463 | 0.618 | 0.013 |
| 1388108_at | BE116152  | ELOVL family member 6, elongation of long chain fatty acids (yeast)                                                     | Elov16               | 0.432 | 0.091 | 0.358 | 0.003 | 0.378  | 0.007 | 0.355 | 0.003 |
| 1394401_at | BF396857  | ELOVL family member 6, elongation of long chain fatty acids (yeast)                                                     | Elov16               | 0.404 | 0.103 | 0.324 | 0.027 | 0.360  | 0.113 | 0.484 | 0.049 |
| 1368541_at | NM_053719 | embigin                                                                                                                 | Emb                  | 0.763 | 0.534 | 0.545 | 0.000 | 0.762  | 0.082 | 0.499 | 0.001 |
| 1373462_at | AI170325  | embryonic ectoderm development (predicted)                                                                              | Eed_predicted        | 1.161 | 0.191 | 2.070 | 0.018 | 1.622  | 0.193 | 1.513 | 0.035 |
| 1370017_at | NM_012948 | emerin                                                                                                                  | Emd                  | 0.496 | 0.006 | 0.812 | 0.030 | 0.559  | 0.030 | 0.861 | 0.023 |
| 1377797_at | AI071470  | EMG1 nucleolar protein homolog (S. cerevisiae) (predicted)                                                              | Emg1_predicted       | 0.832 | 0.835 | 2.263 | 0.065 | 0.644  | 0.220 | 1.462 | 0.665 |
| 1391462_at | AI179635  | emopamil binding protein-like (predicted)                                                                               | Ebpl_predicted       | 0.494 | 0.000 | 0.773 | 0.371 | 0.524  | 0.001 | 0.862 | 0.311 |
| 1396450_at | AW918724  | enabled homolog (Drosophila)                                                                                            | Enah                 | 0.863 | 0.052 | 1.202 | 0.618 | 0.950  | 0.396 | 1.099 | 0.097 |
| 1373535_at | BF397848  | enabled homolog (Drosophila)                                                                                            | Enah                 | 1.061 | 0.058 | 1.630 | 0.009 | 1.536  | 0.036 | 1.831 | 0.002 |
| 1397449_at | AI059353  | Enabled homolog (Drosophila)                                                                                            | Enah                 | 0.782 | 0.258 | 0.448 | 0.030 | 1.126  | 0.467 | 0.670 | 0.193 |
| 1367861_at | NM_024147 | Ena-vasodilator stimulated phosphoprotein                                                                               | Evl                  | 0.264 | 0.001 | 0.358 | 0.004 | 0.326  | 0.144 | 0.165 | 0.066 |
| 1389816_at | AA926357  | endonuclease G                                                                                                          | Endog                | 0.997 | 0.225 | 0.999 | 0.999 | 0.999  | 0.360 | 1.001 | 0.985 |
| 1376431_at | BM387357  | endoplasmic reticulum chaperone SIL1 homolog (S. cerevisiae)                                                            | Sil1                 | 0.871 | 0.355 | 0.496 | 0.000 | 0.761  | 0.043 | 0.503 | 0.030 |
| 1387031_at | U36482    | endoplasmic reticulum protein 29                                                                                        | Erp29                | 0.487 | 0.160 | 0.452 | 0.008 | 0.514  | 0.438 | 0.401 | 0.018 |
| 1398898_at | BI278623  | Endosulfine alpha                                                                                                       | Ensa                 | 1.085 | 0.128 | 1.406 | 0.037 | 1.096  | 0.391 | 1.371 | 0.053 |
| 1369702_at | NM_021842 | endosulfine alpha                                                                                                       | Ensa                 | 1.059 | 0.502 | 0.858 | 0.639 | 0.999  | 0.773 | 0.898 | 0.079 |
| 1395713_at | AI136510  | Endosulfine alpha                                                                                                       | Ensa                 | 1.320 | 0.724 | 1.100 | 0.207 | 1.629  | 0.106 | 1.164 | 0.028 |
| 1389912_at | BI289922  | endosulfine alpha                                                                                                       | Ensa                 | 0.957 | 0.916 | 1.096 | 0.138 | 1.044  | 0.264 | 1.077 | 0.340 |
| 1370048_at | NM_053936 | endothelial differentiation, lysophosphatidic acid G-protein-coupled receptor, 2                                        | Edg2                 | 1.624 | 0.171 | 2.980 | 0.015 | 1.166  | 0.257 | 2.323 | 0.361 |
| 1386989_at | NM_017192 | endothelial differentiation, sphingolipid G-protein-coupled receptor, 5                                                 | Edg5                 | 1.010 | 0.701 | 1.001 | 0.941 | 1.641  | 0.190 | 1.475 | 0.134 |
| 1375189_at | BI285635  | endothelial differentiation-related factor 1 (predicted)                                                                | Edf1_predicted       | 0.948 | 0.879 | 1.093 | 0.771 | 0.813  | 0.473 | 1.110 | 0.570 |

|              |           |                                                                                               |                                  |       |       |        |       |       |       |       |       |
|--------------|-----------|-----------------------------------------------------------------------------------------------|----------------------------------|-------|-------|--------|-------|-------|-------|-------|-------|
| 1367801_at   | NM_053596 | endothelin converting enzyme 1                                                                | Ece1                             | 1.072 | 0.784 | 0.419  | 0.010 | 0.988 | 0.484 | 0.518 | 0.003 |
| 1379396_at   | AI101913  | engulfment and cell motility 1, ced-12 homolog (C. elegans) (predicted)                       | Elmo1_predicted                  | 0.728 | 0.958 | 0.200  | 0.000 | 1.001 | 0.986 | 0.218 | 0.000 |
| 1371613_at   | BM386781  | engulfment and cell motility 2, ced-12 homolog (C. elegans)                                   | Elmo2                            | 0.693 | 0.063 | 0.539  | 0.065 | 0.841 | 0.191 | 0.645 | 0.118 |
| 1374995_at   | BI291645  | engulfment and cell motility 3, ced-12 homolog (C. elegans)                                   | Elmo3                            | 0.828 | 0.258 | 1.000  | 0.997 | 0.931 | 0.401 | 0.917 | 0.111 |
| 1377834_at   | AW434262  | enhancer of polycomb homolog 1 (Drosophila) (predicted)                                       | Epc1_predicted                   | 1.683 | 0.039 | 1.396  | 0.033 | 1.966 | 0.028 | 1.221 | 0.070 |
| 1383467_at   | AW918173  | enhancer of polycomb homolog 2 (Drosophila) (predicted)                                       | Epc2_predicted                   | 1.313 | 0.105 | 2.055  | 0.034 | 0.688 | 0.033 | 2.172 | 0.069 |
| 1382120_at   | AI535147  | enhancer of polycomb homolog 2 (Drosophila) (predicted)                                       | Epc2_predicted                   | 0.944 | 0.749 | 1.255  | 0.129 | 1.072 | 0.678 | 1.191 | 0.196 |
| 1384890_at   | AA998678  | enhancer of zeste homolog 1 (Drosophila) (predicted)                                          | Ezh1_predicted                   | 1.379 | 0.076 | 3.617  | 0.066 | 1.002 | 0.986 | 1.452 | 0.647 |
| 1367575_at   | NM_012554 | enolase 1, alpha /// similar to Alpha enolase (2-phospho-D-glycerate hydro-lyase) (predicted) | Eno1 ///<br>RGD1563294_predicted | 0.703 | 0.141 | 1.705  | 0.009 | 0.617 | 0.047 | 1.620 | 0.011 |
| 1370341_at   | AF019973  | enolase 2, gamma                                                                              | Eno2                             | 0.631 | 0.082 | 1.204  | 0.129 | 0.521 | 0.012 | 1.154 | 0.271 |
| 1386885_at   | NM_022594 | enoyl coenzyme A hydratase 1, peroxisomal                                                     | Ech1                             | 0.425 | 0.123 | 0.707  | 0.030 | 0.314 | 0.003 | 0.612 | 0.009 |
| 1374585_at   | AW915152  | enoyl Coenzyme A hydratase domain containing 1                                                | Echdc1                           | 0.552 | 0.013 | 0.489  | 0.002 | 0.643 | 0.028 | 0.588 | 0.010 |
| 1394971_at   | BE119142  | Enoyl Coenzyme A hydratase domain containing 1                                                | Echdc1                           | 1.072 | 0.947 | 0.620  | 0.069 | 1.188 | 0.411 | 0.618 | 0.170 |
| 1367829_at   | NM_078623 | enoyl Coenzyme A hydratase, short chain, 1, mitochondrial                                     | Echs1                            | 0.659 | 0.301 | 0.926  | 0.514 | 0.719 | 0.104 | 0.850 | 0.654 |
| 1375855_at   | AI171799  | ependymin related protein 2 (zebrafish)                                                       | Epdr2                            | 0.353 | 0.042 | 0.601  | 0.013 | 0.269 | 0.013 | 0.700 | 0.114 |
| 1374143_at   | AI602491  | Eph receptor A2 (predicted)                                                                   | Epha2_predicted                  | 2.528 | 0.009 | 1.802  | 0.019 | 2.798 | 0.071 | 1.526 | 0.025 |
| 1380658_at   | BF402406  | Eph receptor A3                                                                               | Epha3                            | 1.084 | 0.843 | 0.923  | 0.623 | 1.723 | 0.144 | 0.893 | 0.991 |
| 1395262_at   | BF402135  | EphA5                                                                                         | Epha5                            | 1.432 | 0.393 | 1.231  | 0.899 | 1.572 | 0.200 | 1.274 | 0.591 |
| 1374403_at   | BF412072  | ephrin B1                                                                                     | Efnb1                            | 0.819 | 0.200 | 0.649  | 0.026 | 0.806 | 0.117 | 0.977 | 0.489 |
| 1368325_at   | NM_012842 | epidermal growth factor                                                                       | Egf                              | 1.730 | 0.011 | 0.755  | 0.211 | 1.243 | 0.071 | 0.643 | 0.054 |
| 1370830_at   | M37394    | epidermal growth factor receptor                                                              | Egfr                             | 1.300 | 0.049 | 2.011  | 0.098 | 0.986 | 0.064 | 1.689 | 0.059 |
| 1370699_a_at | AF187818  | epidermal growth factor receptor /// peptidase D (mapped)                                     | Egfr /// Pepd_mapped             | 0.511 | 0.006 | 1.258  | 0.007 | 0.532 | 0.011 | 0.981 | 0.915 |
| 1399152_at   | BF559107  | epidermal growth factor receptor pathway substrate 15                                         | Eps15                            | 0.684 | 0.528 | 1.441  | 0.127 | 1.525 | 0.412 | 2.663 | 0.035 |
| 1383213_at   | BF393611  | epidermal growth factor receptor pathway substrate 8 (predicted) /// similar to Eps8          | Eps8_predicted ///<br>LOC365516  | 1.184 | 0.058 | 1.772  | 0.057 | 0.999 | 0.994 | 1.531 | 0.024 |
| 1370835_at   | AF267197  | epidermal Langerhans cell protein LCP1                                                        | RGD708449                        | 0.665 | 0.635 | 0.957  | 0.170 | 0.655 | 0.684 | 0.851 | 0.095 |
| 1371681_at   | AI145556  | epidermal Langerhans cell protein LCP1                                                        | RGD708449                        | 0.978 | 0.831 | 1.023  | 0.507 | 0.875 | 0.106 | 1.011 | 0.798 |
| 1369587_at   | NM_021689 | epiregulin                                                                                    | Ereg                             | 3.114 | 0.021 | 1.038  | 0.606 | 2.129 | 0.308 | 1.004 | 0.984 |
| 1371527_at   | BI275741  | epithelial membrane protein 1                                                                 | Emp1                             | 3.246 | 0.041 | 1.374  | 0.111 | 4.140 | 0.030 | 1.146 | 0.795 |
| 1377752_at   | BE112998  | epithelial membrane protein 2                                                                 | Emp2                             | 1.017 | 0.217 | 13.291 | 0.032 | 1.111 | 0.037 | 5.607 | 0.032 |
| 1375908_at   | BI282616  | epithelial V-like antigen 1 (predicted)                                                       | Eva1_predicted                   | 3.567 | 0.009 | 1.020  | 0.745 | 1.052 | 0.988 | 0.998 | 0.740 |
| 1372568_at   | AI411270  | EPM2A (laforin) interacting protein 1 (predicted)                                             | Epm2aip1_predicted               | 0.705 | 0.423 | 0.503  | 0.004 | 0.807 | 0.078 | 0.550 | 0.004 |
| 1381179_at   | BF415421  | EPM2A (laforin) interacting protein 1 (predicted)                                             | Epm2aip1_predicted               | 0.965 | 0.943 | 0.999  | 0.935 | 1.001 | 0.950 | 0.999 | 0.988 |
| 1387669_a_at | NM_012844 | epoxide hydrolase 1, microsomal                                                               | Ephx1                            | 1.077 | 0.062 | 1.104  | 0.308 | 1.031 | 0.995 | 2.331 | 0.012 |
| 1369663_at   | NM_022936 | epoxide hydrolase 2, cytoplasmic                                                              | Ephx2                            | 0.922 | 0.992 | 0.683  | 0.140 | 0.860 | 0.532 | 0.845 | 0.153 |
| 1372654_at   | BI285918  | EPS8-like 2 (predicted)                                                                       | Eps8l2_predicted                 | 1.961 | 0.002 | 1.615  | 0.010 | 1.740 | 0.055 | 1.295 | 0.016 |
| 1369453_at   | NM_057136 | Epsin 1                                                                                       | Epn1                             | 0.763 | 0.160 | 0.970  | 0.737 | 0.790 | 0.052 | 0.832 | 0.845 |
| 1392223_at   | AW521110  | epsin 2                                                                                       | Epn2                             | 1.543 | 0.007 | 1.715  | 0.004 | 1.095 | 0.148 | 1.282 | 0.023 |
| 1371562_at   | BI296640  | epsin 2                                                                                       | Epn2                             | 1.110 | 0.133 | 0.977  | 0.704 | 1.079 | 0.885 | 0.924 | 0.192 |
| 1373093_at   | AI169756  | ERBB receptor feedback inhibitor 1                                                            | Errfi1                           | 2.441 | 0.078 | 3.192  | 0.004 | 1.028 | 0.852 | 2.339 | 0.011 |
| 1372233_at   | AI228649  | ERGIC and golgi 3 (predicted)                                                                 | Ergic3_predicted                 | 0.775 | 0.727 | 0.549  | 0.002 | 0.686 | 0.104 | 0.812 | 0.050 |
| 1387964_a_at | AY071924  | ERO1-like (S. cerevisiae)                                                                     | Ero1l                            | 0.736 | 0.383 | 1.603  | 0.056 | 0.480 | 0.167 | 1.556 | 0.071 |
| 1387910_at   | AB019256  | erythrocyte protein band 4.1-like 1                                                           | Epb4.111                         | 0.499 | 0.067 | 0.553  | 0.003 | 0.546 | 0.029 | 0.432 | 0.033 |
| 1370503_s_at | AB032828  | erythrocyte protein band 4.1-like 3                                                           | Epb4.113                         | 0.479 | 0.044 | 0.949  | 0.157 | 0.647 | 0.014 | 1.102 | 0.262 |
| 1368515_at   | NM_053927 | erythrocyte protein band 4.1-like 3                                                           | Epb4.113                         | 0.702 | 0.471 | 0.447  | 0.003 | 1.147 | 0.427 | 0.534 | 0.076 |
| 1385033_at   | AI548918  | Erythrocyte protein band 4.1-like 4b (predicted)                                              | Epb4.114b_predicted              | 2.243 | 0.016 | 1.406  | 0.018 | 1.449 | 0.055 | 1.784 | 0.010 |
| 1379788_at   | AI231019  | Erythrocyte protein band 4.1-like 4b (predicted)                                              | Epb4.114b_predicted              | 4.458 | 0.020 | 1.498  | 0.220 | 3.692 | 0.018 | 1.315 | 0.468 |
| 1374984_at   | AA858925  | erythrocyte protein band 4.1-like 5                                                           | Epb4.115                         | 0.583 | 0.137 | 0.929  | 0.513 | 1.059 | 0.652 | 1.117 | 0.808 |
| 1394101_at   | BE109260  | Erythrocyte protein band 4.1-like 5                                                           | Epb4.115                         | 0.831 | 0.769 | 1.075  | 0.261 | 1.162 | 0.442 | 1.162 | 0.364 |
| 1369988_at   | NM_017002 | erythropoietin receptor                                                                       | Epor                             | 0.999 | 0.990 | 1.033  | 0.637 | 1.001 | 0.989 | 1.000 | 0.998 |
| 1398903_at   | AI411425  | esterase D/formylglutathione hydrolase (mapped)                                               | Esds_mapped                      | 0.614 | 0.472 | 1.385  | 0.059 | 0.540 | 0.008 | 1.253 | 0.256 |
| 1391510_at   | BF398331  | estrogen receptor-binding fragment-associated gene 9                                          | Ebag9                            | 0.522 | 0.771 | 0.437  | 0.016 | 0.894 | 0.714 | 0.539 | 0.042 |
| 1390439_at   | BG372835  | estrogen receptor-binding fragment-associated gene 9                                          | Ebag9                            | 0.866 | 0.987 | 0.626  | 0.004 | 0.934 | 0.095 | 0.804 | 0.551 |
| 1374741_at   | AI171726  | Estrogen related receptor, alpha                                                              | Esrra                            | 0.958 | 0.398 | 1.318  | 0.010 | 0.981 | 0.282 | 1.356 | 0.011 |
| 1381445_at   | AA996810  | Estrogen-related receptor gamma                                                               | Esrrg                            | 1.150 | 0.537 | 0.672  | 0.705 | 1.685 | 0.029 | 0.743 | 0.752 |
| 1398875_at   | AI105044  | estrous-specific protein, 250 kDa /// similar to RIKEN cDNA 1500004O14                        | LOC246270 /// LOC366277          | 0.915 | 0.702 | 0.665  | 0.014 | 0.917 | 0.147 | 0.854 | 0.048 |
| 1371710_at   | BM391283  | Ethanolamine kinase 1 (predicted)                                                             | Etnk1_predicted                  | 0.841 | 0.045 | 0.416  | 0.001 | 1.199 | 0.440 | 0.512 | 0.003 |
| 1388642_at   | AI412114  | etoposide induced 2.4 mRNA                                                                    | Ei24                             | 1.028 | 0.733 | 1.239  | 0.056 | 1.207 | 0.409 | 1.263 | 0.037 |
| 1382593_at   | AA963276  | Ets variant gene 1 (predicted)                                                                | Etv1_predicted                   | 1.737 | 0.073 | 0.564  | 0.139 | 2.351 | 0.778 | 0.527 | 0.126 |
| 1392555_at   | AI112936  | Ets variant gene 1 (predicted)                                                                | Etv1_predicted                   | 1.569 | 0.312 | 0.317  | 0.013 | 1.404 | 0.243 | 0.389 | 0.081 |

|              |           |                                                                                                                                  |                                    |       |       |        |       |       |       |       |       |
|--------------|-----------|----------------------------------------------------------------------------------------------------------------------------------|------------------------------------|-------|-------|--------|-------|-------|-------|-------|-------|
| 1392477_at   | AI059914  | ets variant gene 1 (predicted)                                                                                                   | Etv1_predicted                     | 1.438 | 0.656 | 0.483  | 0.015 | 1.597 | 0.304 | 0.522 | 0.098 |
| 1383447_at   | AI101323  | ets variant gene 5 (ets-related molecule) (predicted)                                                                            | Etv5_predicted                     | 1.168 | 0.260 | 6.516  | 0.013 | 0.827 | 0.061 | 8.322 | 0.002 |
| 1382122_at   | BE113124  | Ets variant gene 5 (ets-related molecule) (predicted)                                                                            | Etv5_predicted                     | 0.971 | 0.669 | 2.173  | 0.306 | 0.966 | 0.793 | 2.136 | 0.023 |
| 1374055_at   | BF285169  | Ets2 repressor factor (predicted)                                                                                                | Erf_predicted                      | 0.913 | 0.116 | 3.226  | 0.004 | 1.063 | 0.850 | 2.198 | 0.072 |
| 1388716_at   | BE109525  | euchromatic histone lysine N-methyltransferase 2                                                                                 | Ehmt2                              | 0.913 | 0.867 | 1.085  | 0.815 | 0.688 | 0.274 | 0.945 | 0.079 |
| 1376578_at   | BM389055  | euchromatic histone methyltransferase 1 (predicted)                                                                              | Ehmt1_predicted                    | 1.640 | 0.025 | 1.215  | 0.142 | 1.604 | 0.039 | 1.241 | 0.154 |
| 1379979_at   | AI548961  | eukaryotic elongation factor-2 kinase                                                                                            | Eef2k                              | 0.638 | 0.225 | 0.922  | 0.090 | 0.667 | 0.258 | 0.383 | 0.058 |
| 1370109_s_at | NM_033539 | eukaryotic translation elongation factor 1 alpha 1                                                                               | Eef1a1                             | 1.035 | 0.683 | 1.039  | 0.366 | 0.871 | 0.596 | 0.982 | 0.145 |
| 1388110_at   | X61043    | eukaryotic translation elongation factor 1 alpha 1 /// similar to eukaryotic translation elongation factor 1 alpha 1 (predicted) | Eef1a1 ///<br>RGD1566344_predicted | 0.900 | 0.062 | 0.996  | 0.663 | 0.881 | 0.475 | 0.907 | 0.190 |
| 1388449_at   | AI175551  | eukaryotic translation elongation factor 1 beta 2 (predicted)                                                                    | Eef1b2_predicted                   | 0.861 | 0.740 | 0.992  | 0.798 | 0.651 | 0.165 | 0.974 | 0.806 |
| 1388134_at   | BG380216  | eukaryotic translation elongation factor 1 delta (guanine nucleotide exchange protein)                                           | Eef1d                              | 0.694 | 0.246 | 1.149  | 0.022 | 0.583 | 0.005 | 0.869 | 0.290 |
| 1373200_at   | AI600237  | eukaryotic translation elongation factor 1 epsilon 1 (predicted)                                                                 | Eef1e1_predicted                   | 0.596 | 0.354 | 1.274  | 0.282 | 0.567 | 0.096 | 1.142 | 0.039 |
| 1388297_at   | BM391203  | eukaryotic translation elongation factor 1 gamma                                                                                 | Eef1g                              | 0.927 | 0.490 | 0.982  | 0.482 | 0.768 | 0.121 | 0.927 | 0.900 |
| 1394744_at   | AI556327  | Eukaryotic translation elongation factor 1 gamma                                                                                 | Eef1g                              | 1.145 | 0.671 | 2.075  | 0.323 | 1.364 | 0.343 | 1.028 | 0.609 |
| 1370003_at   | NM_017245 | eukaryotic translation elongation factor 2                                                                                       | Eef2                               | 0.777 | 0.986 | 0.929  | 0.364 | 0.715 | 0.134 | 0.972 | 0.085 |
| 1384147_at   | AA955540  | eukaryotic translation initiation factor 1A                                                                                      | Eif1a                              | 1.045 | 0.389 | 2.891  | 0.007 | 1.183 | 0.107 | 2.751 | 0.005 |
| 1397892_at   | BI301150  | eukaryotic translation initiation factor 1A                                                                                      | Eif1a                              | 1.221 | 0.736 | 2.497  | 0.108 | 1.033 | 0.929 | 2.084 | 0.075 |
| 1395840_at   | AW520679  | eukaryotic translation initiation factor 1A                                                                                      | Eif1a                              | 0.627 | 0.950 | 3.249  | 0.108 | 0.679 | 0.542 | 2.120 | 0.074 |
| 1373411_at   | BE109655  | eukaryotic translation initiation factor 1B (predicted)                                                                          | Eif1b_predicted                    | 0.682 | 0.574 | 1.013  | 0.587 | 0.532 | 0.053 | 0.963 | 0.302 |
| 1380593_at   | AI008189  | Eukaryotic translation initiation factor 2 alpha kinase 1                                                                        | Eif2ak1                            | 1.455 | 0.574 | 0.999  | 0.660 | 1.259 | 0.036 | 0.556 | 0.430 |
| 1387272_at   | NM_013223 | eukaryotic translation initiation factor 2 alpha kinase 1                                                                        | Eif2ak1                            | 0.985 | 0.997 | 1.023  | 0.691 | 0.903 | 0.338 | 1.245 | 0.118 |
| 1368326_at   | NM_031599 | eukaryotic translation initiation factor 2 alpha kinase 3                                                                        | Eif2ak3                            | 2.213 | 0.009 | 2.132  | 0.007 | 2.743 | 0.013 | 1.883 | 0.026 |
| 1374224_at   | AI169164  | eukaryotic translation initiation factor 2 alpha kinase 4 (predicted)                                                            | Eif2ak4_predicted                  | 0.880 | 0.245 | 0.891  | 0.084 | 1.002 | 0.819 | 0.867 | 0.051 |
| 1385118_at   | BI292531  | eukaryotic translation initiation factor 2, subunit 1 alpha                                                                      | Eif2s1                             | 0.498 | 0.018 | 0.545  | 0.003 | 0.697 | 0.152 | 0.758 | 0.135 |
| 1367713_at   | NM_019356 | eukaryotic translation initiation factor 2, subunit 1 alpha                                                                      | Eif2s1                             | 0.560 | 0.127 | 1.215  | 0.913 | 0.394 | 0.010 | 1.074 | 0.524 |
| 1374397_at   | BE107498  | eukaryotic translation initiation factor 2, subunit 2 (beta)                                                                     | Eif2s2                             | 0.864 | 0.382 | 1.481  | 0.003 | 0.641 | 0.131 | 1.347 | 0.001 |
| 1398936_at   | AI598546  | eukaryotic translation initiation factor 2, subunit 3, structural gene X-linked                                                  | Eif2s3x                            | 1.047 | 0.815 | 1.079  | 0.510 | 0.987 | 0.454 | 0.982 | 0.324 |
| 1397693_at   | BG662620  | eukaryotic translation initiation factor 2, subunit 3, structural gene X-linked                                                  | Eif2s3x                            | 1.356 | 0.941 | 1.115  | 0.440 | 0.547 | 0.104 | 0.940 | 0.188 |
| 1370311_at   | U05821    | eukaryotic translation initiation factor 2B, subunit 1 alpha                                                                     | Eif2b1                             | 0.335 | 0.117 | 1.065  | 0.440 | 0.626 | 0.016 | 1.071 | 0.592 |
| 1367714_at   | NM_032058 | eukaryotic translation initiation factor 2B, subunit 2 beta                                                                      | Eif2b2                             | 1.192 | 0.017 | 1.180  | 0.892 | 0.934 | 0.998 | 1.170 | 0.864 |
| 1368967_at   | NM_133609 | eukaryotic translation initiation factor 2B, subunit 3 gamma                                                                     | Eif2b3                             | 1.249 | 0.279 | 2.212  | 0.003 | 0.707 | 0.079 | 1.424 | 0.029 |
| 1386970_at   | NM_053950 | eukaryotic translation initiation factor 2B, subunit 4 delta                                                                     | Eif2b4                             | 0.350 | 0.025 | 0.925  | 0.745 | 0.638 | 0.016 | 1.093 | 0.598 |
| 1387940_at   | U19516    | eukaryotic translation initiation factor 2B, subunit 5 epsilon                                                                   | Eif2b5                             | 0.967 | 0.837 | 0.864  | 0.644 | 0.479 | 0.066 | 0.790 | 0.209 |
| 1375249_at   | BE109033  | eukaryotic translation initiation factor 2C, 1 (predicted)                                                                       | Eif2c1_predicted                   | 0.891 | 0.261 | 0.939  | 0.075 | 1.037 | 0.753 | 0.834 | 0.367 |
| 1368867_at   | BF281131  | eukaryotic translation initiation factor 2C, 2                                                                                   | Eif2c2                             | 1.967 | 0.008 | 10.317 | 0.003 | 2.202 | 0.004 | 5.129 | 0.001 |
| 1368866_at   | NM_021597 | eukaryotic translation initiation factor 2C, 2                                                                                   | Eif2c2                             | 1.069 | 0.886 | 3.029  | 0.047 | 1.167 | 0.987 | 5.097 | 0.014 |
| 1390703_at   | AW251303  | Eukaryotic translation initiation factor 3, subunit 1 alpha (predicted)                                                          | Eif3s1_predicted                   | 1.187 | 0.122 | 1.002  | 0.860 | 0.991 | 0.864 | 1.000 | 0.966 |
| 1388424_at   | AI407015  | eukaryotic translation initiation factor 3, subunit 1 alpha (predicted)                                                          | Eif3s1_predicted                   | 0.665 | 0.251 | 1.652  | 0.008 | 0.509 | 0.070 | 1.216 | 0.062 |
| 1395199_at   | AA998946  | eukaryotic translation initiation factor 3, subunit 1 alpha (predicted)                                                          | Eif3s1_predicted                   | 0.730 | 0.438 | 1.668  | 0.323 | 0.571 | 0.063 | 1.268 | 0.590 |
| 1389968_at   | BG376953  | eukaryotic translation initiation factor 3, subunit 10 (theta)                                                                   | Eif3s10                            | 0.705 | 0.619 | 0.948  | 0.280 | 0.816 | 0.673 | 0.973 | 0.315 |
| 1379485_at   | BF389640  | eukaryotic translation initiation factor 3, subunit 10 (theta)                                                                   | Eif3s10                            | 0.849 | 0.813 | 1.399  | 0.027 | 1.077 | 0.624 | 1.398 | 0.810 |
| 1381339_at   | AI113218  | eukaryotic translation initiation factor 3, subunit 12 (predicted)                                                               | Eif3s12_predicted                  | 0.673 | 0.123 | 0.998  | 0.999 | 0.654 | 0.099 | 1.029 | 0.519 |
| 1372735_at   | BI283109  | eukaryotic translation initiation factor 3, subunit 12 (predicted)                                                               | Eif3s12_predicted                  | 0.771 | 0.535 | 1.037  | 0.753 | 0.609 | 0.004 | 0.852 | 0.839 |
| 1388390_at   | AI231784  | eukaryotic translation initiation factor 3, subunit 3 gamma                                                                      | Eif3s3                             | 0.965 | 0.859 | 1.505  | 0.006 | 0.782 | 0.002 | 1.264 | 0.057 |
| 1388381_at   | AI411198  | eukaryotic translation initiation factor 3, subunit 4 (delta)                                                                    | Eif3s4                             | 0.802 | 0.774 | 1.311  | 0.078 | 0.859 | 0.032 | 0.948 | 0.568 |
| 1373040_at   | BI281752  | eukaryotic translation initiation factor 3, subunit 5 (epsilon) (predicted)                                                      | Eif3s5_predicted                   | 0.888 | 0.498 | 1.507  | 0.042 | 0.829 | 0.014 | 1.473 | 0.058 |
| 1371973_at   | AI237620  | eukaryotic translation initiation factor 3, subunit 6                                                                            | Eif3s6                             | 1.185 | 0.400 | 1.252  | 0.117 | 1.070 | 0.281 | 1.227 | 0.059 |
| 1398929_at   | AW525691  | eukaryotic translation initiation factor 3, subunit 6 interacting protein                                                        | Eif3s6ip                           | 0.651 | 0.225 | 0.861  | 0.110 | 0.553 | 0.002 | 0.936 | 0.128 |
| 1390880_at   | BF420467  | eukaryotic translation initiation factor 3, subunit 6 interacting protein                                                        | Eif3s6ip                           | 0.751 | 0.542 | 0.375  | 0.074 | 0.587 | 0.203 | 0.382 | 0.039 |
| 1388568_at   | AA891553  | eukaryotic translation initiation factor 3, subunit 7 (zeta)                                                                     | Eif3s7                             | 0.800 | 0.116 | 1.788  | 0.003 | 0.678 | 0.002 | 1.452 | 0.016 |
| 1388378_at   | AI412236  | eukaryotic translation initiation factor 3, subunit 8, 110kDa                                                                    | Eif3s8                             | 0.739 | 0.471 | 1.279  | 0.006 | 0.639 | 0.117 | 1.137 | 0.076 |
| 1397674_at   | AI502930  | eukaryotic translation initiation factor 3, subunit 8, 110kDa                                                                    | Eif3s8                             | 0.623 | 0.505 | 0.918  | 0.954 | 0.548 | 0.019 | 0.724 | 0.179 |
| 1388576_at   | BF281368  | eukaryotic translation initiation factor 3, subunit 9 (eta)                                                                      | Eif3s9                             | 0.798 | 0.359 | 1.811  | 0.010 | 0.683 | 0.019 | 1.483 | 0.029 |
| 1388322_at   | AI170773  | eukaryotic translation initiation factor 4 gamma, 1                                                                              | Eif4g1                             | 0.909 | 0.633 | 1.521  | 0.033 | 0.849 | 0.132 | 1.284 | 0.128 |
| 1395702_at   | AW522392  | eukaryotic translation initiation factor 4 gamma, 1 /// similar to Eif4g1 protein (predicted)                                    | Eif4g1 ///<br>RGD1563212_predicted | 1.237 | 0.676 | 2.160  | 0.064 | 1.001 | 0.154 | 1.465 | 0.227 |
| 1390340_a_at | AA899256  | eukaryotic translation initiation factor 4 gamma, 1 /// similar to Eif4g1 protein (predicted)                                    | Eif4g1 ///<br>RGD1563212_predicted | 0.749 | 0.975 | 1.272  | 0.273 | 0.798 | 0.346 | 0.795 | 0.286 |
| 1367469_at   | BG667162  | Eukaryotic translation initiation factor 4 gamma, 2                                                                              | Eif4g2                             | 0.836 | 0.694 | 1.223  | 0.005 | 0.791 | 0.391 | 1.104 | 0.087 |
| 1388359_at   | AI599478  | Eukaryotic translation initiation factor 4 gamma, 2                                                                              | Eif4g2                             | 0.727 | 0.881 | 0.492  | 0.024 | 0.615 | 0.604 | 0.530 | 0.010 |

|              |           |                                                                                                   |                   |       |       |       |       |       |       |       |       |
|--------------|-----------|---------------------------------------------------------------------------------------------------|-------------------|-------|-------|-------|-------|-------|-------|-------|-------|
| 1373364_at   | BI294767  | eukaryotic translation initiation factor 4 gamma, 3 (predicted)                                   | Eif4g3_predicted  | 1.169 | 0.373 | 0.518 | 0.009 | 1.181 | 0.826 | 0.613 | 0.025 |
| 1397520_at   | BG672378  | eukaryotic translation initiation factor 4, gamma 2 (predicted)                                   | Eif4g2_predicted  | 0.948 | 0.755 | 0.724 | 0.642 | 0.372 | 0.064 | 0.813 | 0.496 |
| 1371936_at   | BI284436  | eukaryotic translation initiation factor 4A1                                                      | Eif4a1            | 0.669 | 0.281 | 1.105 | 0.632 | 0.709 | 0.329 | 0.888 | 0.510 |
| 1397697_at   | BF558764  | Eukaryotic translation initiation factor 4A2                                                      | Eif4a2            | 0.710 | 0.079 | 0.397 | 0.008 | 0.553 | 0.252 | 0.603 | 0.001 |
| 1371642_at   | AI169170  | eukaryotic translation initiation factor 4A2                                                      | Eif4a2            | 0.982 | 0.735 | 1.015 | 0.806 | 0.923 | 0.348 | 0.848 | 0.158 |
| 1372124_at   | BI278814  | eukaryotic translation initiation factor 4B                                                       | Eif4b             | 1.206 | 0.250 | 3.459 | 0.001 | 0.958 | 0.493 | 2.161 | 0.015 |
| 1371404_at   | AI172206  | eukaryotic translation initiation factor 4B                                                       | Eif4b             | 1.023 | 0.926 | 1.303 | 0.167 | 0.851 | 0.428 | 1.092 | 0.785 |
| 1398799_at   | NM_053974 | eukaryotic translation initiation factor 4E                                                       | Eif4e             | 0.925 | 0.037 | 1.083 | 0.198 | 0.892 | 0.076 | 1.093 | 0.097 |
| 1386888_at   | NM_053857 | eukaryotic translation initiation factor 4E binding protein 1                                     | Eif4ebp1          | 1.128 | 0.561 | 4.301 | 0.012 | 0.650 | 0.235 | 2.243 | 0.087 |
| 1398846_at   | BE107346  | eukaryotic translation initiation factor 5                                                        | Eif5              | 1.079 | 0.267 | 1.501 | 0.033 | 0.908 | 0.719 | 1.506 | 0.106 |
| 1388206_a_at | K01677    | eukaryotic translation initiation factor 5                                                        | Eif5              | 1.365 | 0.425 | 2.790 | 0.004 | 1.067 | 0.719 | 2.044 | 0.015 |
| 1398845_at   | BF282186  | eukaryotic translation initiation factor 5                                                        | Eif5              | 1.031 | 0.603 | 1.345 | 0.002 | 0.878 | 0.061 | 1.468 | 0.006 |
| 1371329_at   | BI283681  | eukaryotic translation initiation factor 5A                                                       | Eif5a             | 0.824 | 0.743 | 1.385 | 0.032 | 0.863 | 0.817 | 1.464 | 0.117 |
| 1383867_at   | BE102803  | Eukaryotic translation initiation factor 5A2 (predicted)                                          | Eif5a2_predicted  | 0.936 | 0.484 | 1.935 | 0.030 | 1.442 | 0.243 | 1.828 | 0.029 |
| 1388947_at   | BI291654  | eukaryotic translation initiation factor 5B                                                       | Eif5b             | 1.291 | 0.147 | 1.346 | 0.003 | 0.833 | 0.556 | 1.104 | 0.194 |
| 1395237_at   | BE117773  | eukaryotic translation initiation factor 5B                                                       | Eif5b             | 0.843 | 0.988 | 1.227 | 0.020 | 1.004 | 0.993 | 1.032 | 0.871 |
| 1389038_at   | BF285301  | eukaryotic translation termination factor 1                                                       | Etf1              | 0.820 | 0.561 | 1.682 | 0.002 | 0.676 | 0.002 | 1.517 | 0.002 |
| 1373917_at   | BE100459  | Eukaryotic translation termination factor 1                                                       | Etf1              | 0.791 | 0.688 | 1.046 | 0.692 | 0.760 | 0.558 | 0.860 | 0.219 |
| 1373420_at   | AI175479  | evolutionarily conserved signaling intermediate in Toll pathway                                   | MGC94704          | 0.449 | 0.003 | 1.041 | 0.075 | 0.415 | 0.002 | 1.203 | 0.214 |
| 1389289_at   | AW534728  | Ewing sarcoma breakpoint region 1                                                                 | Ewsr1             | 0.953 | 0.513 | 1.812 | 0.067 | 1.019 | 0.158 | 1.373 | 0.053 |
| 1374011_at   | BM388758  | excision repair cross-complementing rodent repair deficiency, complementation group 3             | Ercc3             | 0.748 | 0.722 | 0.679 | 0.072 | 0.824 | 0.462 | 0.826 | 0.052 |
| 1383953_at   | BM384968  | excision repair cross-complementing rodent repair deficiency, complementation group 5 (mapped)    | Ercc5_mapped      | 0.953 | 0.338 | 0.605 | 0.129 | 4.041 | 0.053 | 1.086 | 0.349 |
| 1379299_at   | BE106364  | excision repair cross-complementing rodent repair deficiency, complementation group 8 (predicted) | Ercc8_predicted   | 0.742 | 0.158 | 1.018 | 0.897 | 0.570 | 0.379 | 1.001 | 0.805 |
| 1368225_at   | NM_134414 | exocyst complex component 2                                                                       | Exoc2             | 1.122 | 0.430 | 0.427 | 0.027 | 1.484 | 0.004 | 0.895 | 0.579 |
| 1374656_at   | AA851443  | exocyst complex component 3                                                                       | Exoc3             | 0.710 | 0.021 | 1.077 | 0.292 | 0.846 | 0.034 | 1.103 | 0.289 |
| 1370686_at   | U32575    | exocyst complex component 3                                                                       | Exoc3             | 0.853 | 0.221 | 0.898 | 0.932 | 0.585 | 0.061 | 1.048 | 0.846 |
| 1389624_s_at | AA851443  | exocyst complex component 3                                                                       | Exoc3             | 0.602 | 0.466 | 1.289 | 0.797 | 0.614 | 0.079 | 0.731 | 0.088 |
| 1376774_at   | BG380482  | Exocyst complex component 4                                                                       | Exoc4             | 1.037 | 0.877 | 0.689 | 0.112 | 1.159 | 0.134 | 0.959 | 0.324 |
| 1395155_at   | BF386083  | exocyst complex component 5                                                                       | Exoc5             | 1.291 | 0.024 | 1.211 | 0.241 | 1.302 | 0.454 | 1.572 | 0.038 |
| 1387841_at   | NM_022204 | exocyst complex component 5                                                                       | Exoc5             | 1.138 | 0.687 | 4.080 | 0.011 | 0.720 | 0.209 | 2.353 | 0.038 |
| 1387369_at   | NM_019277 | exocyst complex component 6                                                                       | Exoc6             | 5.539 | 0.006 | 3.076 | 0.021 | 6.941 | 0.006 | 3.851 | 0.010 |
| 1387237_at   | BM388722  | exocyst complex component 7                                                                       | Exoc7             | 0.656 | 0.005 | 0.582 | 0.044 | 0.668 | 0.045 | 0.700 | 0.064 |
| 1368538_at   | NM_022691 | exocyst complex component 7                                                                       | Exoc7             | 0.247 | 0.092 | 0.263 | 0.030 | 0.245 | 0.020 | 0.521 | 0.380 |
| 1378780_at   | BF410325  | Exophilin 5 (predicted)                                                                           | Exph5_predicted   | 1.110 | 0.666 | 0.840 | 0.816 | 2.251 | 0.156 | 0.713 | 0.209 |
| 1379348_at   | BF420491  | exosome component 2 (predicted)                                                                   | Exosc2_predicted  | 0.291 | 0.075 | 0.842 | 0.608 | 0.548 | 0.055 | 1.251 | 0.870 |
| 1392111_at   | AW435086  | exosome component 3 (predicted)                                                                   | Exosc3_predicted  | 0.931 | 0.233 | 1.213 | 0.206 | 0.701 | 0.005 | 1.005 | 0.910 |
| 1371670_at   | BF407149  | exosome component 4 (predicted)                                                                   | Exosc4_predicted  | 0.367 | 0.182 | 1.366 | 0.025 | 0.422 | 0.031 | 1.266 | 0.222 |
| 1372688_at   | BI296190  | exosome component 7                                                                               | Exosc7            | 0.528 | 0.122 | 0.846 | 0.581 | 0.570 | 0.202 | 0.904 | 0.220 |
| 1372343_at   | BM384065  | exosome component 8 (predicted)                                                                   | Exosc8_predicted  | 0.930 | 0.501 | 1.846 | 0.505 | 0.773 | 0.038 | 1.543 | 0.314 |
| 1398384_at   | BI298225  | exosome component 9                                                                               | Exosc9            | 0.709 | 0.018 | 0.707 | 0.240 | 1.035 | 0.595 | 0.823 | 0.091 |
| 1371611_at   | BM387363  | exostoses (multiple) 2 (predicted)                                                                | Ext2_predicted    | 0.516 | 0.260 | 0.600 | 0.001 | 0.434 | 0.006 | 0.621 | 0.001 |
| 1379354_at   | AA851239  | exostoses (multiple)-like 2                                                                       | Extl2             | 0.840 | 0.133 | 0.695 | 0.125 | 0.624 | 0.115 | 0.747 | 0.110 |
| 1388150_at   | AW533924  | exportin 1, CRM1 homolog (yeast)                                                                  | Xpo1              | 0.930 | 0.101 | 3.184 | 0.001 | 0.756 | 0.034 | 3.338 | 0.014 |
| 1385864_at   | BF542299  | exportin 4 (predicted)                                                                            | Xpo4_predicted    | 1.082 | 0.142 | 1.322 | 0.015 | 1.012 | 0.987 | 1.076 | 0.106 |
| 1385428_at   | AI072630  | exportin 4 (predicted)                                                                            | Xpo4_predicted    | 0.615 | 0.849 | 1.911 | 0.019 | 0.584 | 0.039 | 1.716 | 0.007 |
| 1389063_at   | BG378160  | exportin 6                                                                                        | Xpo6              | 2.538 | 0.021 | 2.492 | 0.004 | 2.666 | 0.000 | 2.932 | 0.012 |
| 1371516_at   | BM391834  | exportin 7                                                                                        | Xpo7              | 0.759 | 0.007 | 1.123 | 0.155 | 0.904 | 0.258 | 1.149 | 0.270 |
| 1397312_at   | AI574904  | exportin 7                                                                                        | Xpo7              | 0.938 | 0.069 | 1.018 | 0.643 | 0.970 | 0.970 | 1.020 | 0.471 |
| 1393983_at   | AA998204  | exportin, tRNA (nuclear export receptor for tRNAs) (predicted)                                    | Xpot_predicted    | 0.872 | 0.593 | 3.205 | 0.000 | 0.772 | 0.400 | 2.996 | 0.007 |
| 1370295_at   | D13374    | expressed in non-metastatic cells 1                                                               | Nme1              | 0.652 | 0.448 | 1.130 | 0.559 | 0.707 | 0.005 | 0.947 | 0.330 |
| 1367766_at   | NM_031833 | expressed in non-metastatic cells 2                                                               | Nme2              | 0.872 | 0.693 | 1.345 | 0.074 | 0.796 | 0.720 | 1.247 | 0.138 |
| 1382732_at   | BE116084  | extracellular link domain-containing 1 (predicted)                                                | Xlkd1_predicted   | 1.707 | 0.417 | 0.983 | 0.918 | 0.871 | 0.813 | 1.374 | 0.199 |
| 1387279_at   | NM_053796 | F11 receptor                                                                                      | F11r              | 2.265 | 0.020 | 2.027 | 0.019 | 1.721 | 0.202 | 2.074 | 0.000 |
| 1376921_at   | BG381722  | FAD-dependent oxidoreductase domain containing 1 (predicted)                                      | Foxred1_predicted | 0.968 | 0.929 | 0.913 | 0.132 | 0.989 | 0.151 | 1.845 | 0.170 |
| 1393412_at   | AW920562  | family with sequence similarity 3, member C                                                       | Fam3c             | 0.627 | 0.132 | 1.250 | 0.002 | 0.595 | 0.058 | 1.014 | 0.999 |
| 1379398_at   | BM385853  | Family with sequence similarity 31, member B (predicted)                                          | Fam31b_predicted  | 1.047 | 0.753 | 1.190 | 0.557 | 1.306 | 0.842 | 1.090 | 0.685 |
| 1381193_at   | BE115518  | family with sequence similarity 34, member A (predicted)                                          | Fam34a_predicted  | 1.185 | 0.858 | 2.769 | 0.006 | 0.561 | 0.067 | 2.844 | 0.010 |
| 1390697_at   | BI278125  | family with sequence similarity 51, member A1 homolog (human)                                     | Fam51a1           | 0.987 | 0.980 | 0.766 | 0.174 | 1.552 | 0.553 | 1.160 | 0.343 |
| 1383287_at   | BE329232  | far upstream element (FUSE) binding protein 1                                                     | Fubp1             | 0.840 | 0.563 | 0.548 | 0.267 | 0.957 | 0.669 | 1.069 | 0.819 |
| 1381483_at   | BE118096  | Far upstream element (FUSE) binding protein 3                                                     | Fubp3             | 1.328 | 0.468 | 0.874 | 0.015 | 1.198 | 0.434 | 0.648 | 0.114 |
| 1382390_at   | AI177572  | Far upstream element (FUSE) binding protein 3                                                     | Fubp3             | 0.936 | 0.894 | 0.648 | 0.002 | 1.135 | 0.642 | 0.783 | 0.086 |



|              |           |                                                        |                  |       |       |        |       |       |       |       |       |
|--------------|-----------|--------------------------------------------------------|------------------|-------|-------|--------|-------|-------|-------|-------|-------|
| 1367667_at   | NM_031840 | farnesyl diphosphate synthase                          | Fdps             | 0.686 | 0.080 | 1.060  | 0.474 | 0.761 | 0.319 | 1.078 | 0.925 |
| 1367839_at   | NM_019238 | farnesyl diphosphate farnesyl transferase 1            | Fdft1            | 0.844 | 0.039 | 1.423  | 0.019 | 0.629 | 0.080 | 1.038 | 0.656 |
| 1389906_at   | AW530769  | farnesyl diphosphate farnesyl transferase 1            | Fdft1            | 0.414 | 0.189 | 1.194  | 0.127 | 0.623 | 0.401 | 0.730 | 0.253 |
| 1367824_at   | NM_012847 | farnesyltransferase, CAAX box, alpha                   | Fnta             | 0.597 | 0.078 | 1.352  | 0.013 | 0.733 | 0.004 | 1.292 | 0.040 |
| 1389991_at   | BI278555  | Fas (TNFRSF6) binding factor 1 (predicted)             | Fbf1_predicted   | 0.567 | 0.053 | 0.969  | 0.754 | 1.164 | 0.298 | 1.002 | 0.986 |
| 1370044_at   | NM_080895 | Fas apoptotic inhibitory molecule                      | Faim             | 0.643 | 0.033 | 0.455  | 0.005 | 0.543 | 0.034 | 0.409 | 0.002 |
| 1387800_at   | NM_080891 | Fas death domain-associated protein                    | Daxx             | 2.964 | 0.036 | 2.228  | 0.006 | 9.100 | 0.005 | 4.061 | 0.012 |
| 1387587_at   | NM_012908 | Fas ligand (TNF superfamily, member 6)                 | Faslg            | 1.293 | 0.262 | 1.021  | 0.534 | 1.166 | 0.722 | 1.005 | 0.997 |
| 1372551_at   | AI227743  | Fas-activated serine/threonine kinase                  | Fastk            | 0.501 | 0.027 | 0.516  | 0.111 | 0.475 | 0.162 | 0.613 | 0.207 |
| 1369995_at   | NM_130406 | Fas-associated factor 1                                | Faf1             | 0.697 | 0.136 | 1.867  | 0.009 | 0.495 | 0.005 | 1.349 | 0.096 |
| 1367918_at   | NM_031066 | fasciculation and elongation protein zeta 1 (zygin I)  | Fez1             | 1.342 | 0.392 | 1.020  | 0.050 | 2.545 | 0.002 | 1.018 | 0.606 |
| 1388137_a_at | AA955230  | fasciculation and elongation protein zeta 2 (zygin II) | Fez2             | 1.252 | 0.253 | 1.431  | 0.004 | 1.239 | 0.333 | 1.538 | 0.018 |
| 1370033_at   | NM_020104 | fast myosin alkali light chain                         | Mlc3             | 1.001 | 0.998 | 0.992  | 0.983 | 1.002 | 0.984 | 1.009 | 0.856 |
| 1369909_s_at | NM_139107 | fasting-inducible integral membrane protein TM6P1      | Tm6p1            | 0.615 | 0.175 | 0.618  | 0.397 | 0.599 | 0.246 | 0.645 | 0.261 |
| 1367654_at   | NM_031819 | fat tumor suppressor homolog (Drosophila)              | Fath             | 0.733 | 0.042 | 0.625  | 0.055 | 0.607 | 0.001 | 0.745 | 0.112 |
| 1381620_at   | BF389656  | Fat tumor suppressor homolog (Drosophila)              | Fath             | 1.011 | 0.567 | 1.183  | 0.105 | 0.853 | 0.570 | 2.568 | 0.027 |
| 1368717_at   | NM_024132 | fatty acid amide hydrolase                             | Faah             | 0.544 | 0.002 | 0.249  | 0.013 | 0.430 | 0.029 | 0.537 | 0.137 |
| 1384341_at   | AI136853  | fatty acid amide hydrolase                             | Faah             | 0.430 | 0.022 | 0.464  | 0.017 | 0.407 | 0.047 | 0.186 | 0.071 |
| 1370281_at   | U13253    | fatty acid binding protein 5, epidermal                | Fabp5            | 1.885 | 0.310 | 19.415 | 0.000 | 0.880 | 0.662 | 7.715 | 0.000 |
| 1367857_at   | NM_053445 | fatty acid desaturase 1                                | Fads1            | 0.213 | 0.007 | 0.280  | 0.000 | 0.253 | 0.045 | 0.274 | 0.022 |
| 1375782_at   | BF412915  | Fatty acid desaturase 1                                | Fads1            | 0.963 | 0.327 | 0.985  | 0.454 | 0.948 | 0.360 | 0.938 | 0.255 |
| 1368453_at   | NM_031344 | fatty acid desaturase 2                                | Fads2            | 0.863 | 0.044 | 0.241  | 0.020 | 0.758 | 0.061 | 0.351 | 0.045 |
| 1372476_at   | AW533321  | fatty acid desaturase 3                                | Fads3            | 0.784 | 0.084 | 0.956  | 0.347 | 0.776 | 0.084 | 0.827 | 0.845 |
| 1367708_a_at | AI179334  | fatty acid synthase                                    | Fasn             | 0.317 | 0.042 | 0.935  | 0.656 | 0.456 | 0.056 | 0.769 | 0.170 |
| 1367707_at   | NM_017332 | fatty acid synthase                                    | Fasn             | 0.327 | 0.145 | 0.495  | 0.001 | 0.121 | 0.037 | 0.499 | 0.098 |
| 1375043_at   | BF415939  | FBJ murine osteosarcoma viral oncogene homolog         | Fos              | 0.334 | 0.049 | 0.699  | 0.048 | 0.330 | 0.013 | 0.295 | 0.105 |
| 1393101_at   | BM385838  | F-box and leucine-rich repeat protein 10               | Fbx10            | 0.669 | 0.090 | 0.944  | 0.418 | 0.486 | 0.016 | 0.989 | 0.997 |
| 1399154_at   | BF389273  | F-box and leucine-rich repeat protein 11 (predicted)   | Fbx11_predicted  | 1.135 | 0.310 | 0.839  | 0.017 | 1.237 | 0.016 | 1.044 | 0.582 |
| 1384489_at   | BM387189  | F-box and leucine-rich repeat protein 11 (predicted)   | Fbx11_predicted  | 0.999 | 0.663 | 0.777  | 0.236 | 1.344 | 0.092 | 0.944 | 0.607 |
| 1378294_at   | BF282402  | F-box and leucine-rich repeat protein 12               | Fbx12            | 1.864 | 0.054 | 1.929  | 0.012 | 2.172 | 0.037 | 2.019 | 0.011 |
| 1383465_at   | AI058747  | F-box and leucine-rich repeat protein 14 (predicted)   | Fbx14_predicted  | 1.079 | 0.802 | 0.955  | 0.634 | 1.479 | 0.225 | 1.076 | 0.402 |
| 1373147_at   | AI145387  | F-box and leucine-rich repeat protein 3                | Fbx13            | 1.469 | 0.044 | 0.748  | 0.013 | 1.558 | 0.178 | 0.652 | 0.002 |
| 1372969_at   | BI289651  | F-box and leucine-rich repeat protein 3                | Fbx13            | 2.187 | 0.068 | 1.991  | 0.002 | 1.407 | 0.057 | 1.672 | 0.016 |
| 1377484_at   | BE096747  | F-box and leucine-rich repeat protein 3                | Fbx13            | 1.000 | 0.738 | 0.998  | 0.979 | 0.992 | 0.641 | 0.999 | 0.974 |
| 1391005_at   | AA997732  | F-box and leucine-rich repeat protein 4 (predicted)    | Fbx14_predicted  | 0.722 | 0.052 | 0.968  | 0.829 | 0.652 | 0.622 | 0.839 | 0.592 |
| 1372776_at   | BM392017  | F-box and leucine-rich repeat protein 5 (predicted)    | Fbx15_predicted  | 1.365 | 0.038 | 1.068  | 0.798 | 1.283 | 0.015 | 0.911 | 0.062 |
| 1389078_at   | BF282132  | F-box and leucine-rich repeat protein 6                | Fbx16            | 0.995 | 0.969 | 2.135  | 0.096 | 0.984 | 0.932 | 2.521 | 0.027 |
| 1381753_at   | BF416214  | F-box and leucine-rich repeat protein 7 (predicted)    | Fbx17_predicted  | 1.488 | 0.550 | 2.470  | 0.062 | 5.926 | 0.061 | 1.095 | 0.763 |
| 1395138_at   | AW534201  | F-box and leucine-rich repeat protein 7 (predicted)    | Fbx17_predicted  | 1.600 | 0.823 | 1.320  | 0.618 | 0.787 | 0.390 | 0.936 | 0.467 |
| 1393407_at   | AW915859  | F-box and WD-40 domain protein 2 (predicted)           | Fbxw2_predicted  | 0.719 | 0.364 | 1.088  | 0.704 | 0.694 | 0.033 | 0.926 | 0.298 |
| 1385772_at   | BF416058  | F-box and WD-40 domain protein 2 (predicted)           | Fbxw2_predicted  | 1.556 | 0.468 | 0.943  | 0.620 | 1.484 | 0.375 | 1.028 | 0.952 |
| 1392469_at   | AI102773  | F-box and WD-40 domain protein 2 (predicted)           | Fbxw2_predicted  | 0.826 | 0.636 | 1.665  | 0.022 | 0.770 | 0.118 | 1.674 | 0.013 |
| 1373211_at   | BF283421  | F-box and WD-40 domain protein 4 (predicted)           | Fbxw4_predicted  | 0.902 | 0.419 | 1.859  | 0.341 | 1.130 | 0.595 | 1.200 | 0.109 |
| 1388518_at   | AA799654  | F-box and WD-40 domain protein 5                       | Fbxw5            | 0.743 | 0.027 | 0.891  | 0.035 | 0.856 | 0.270 | 1.140 | 0.562 |
| 1389106_at   | AI407555  | F-box and WD-40 domain protein 9                       | Fbxw9            | 0.720 | 0.009 | 1.160  | 0.112 | 0.978 | 0.060 | 1.061 | 0.076 |
| 1389518_at   | AI009763  | F-box only protein 10 (predicted)                      | Fbxo10_predicted | 0.859 | 0.321 | 1.753  | 0.007 | 1.044 | 0.834 | 1.392 | 0.025 |
| 1376587_at   | AA818128  | F-box only protein 11                                  | Fbxo11           | 1.279 | 0.378 | 0.689  | 0.007 | 1.471 | 0.004 | 0.839 | 0.088 |
| 1372393_at   | AI409506  | F-box only protein 18 (predicted)                      | Fbxo18_predicted | 1.079 | 0.683 | 0.690  | 0.096 | 1.104 | 0.537 | 0.713 | 0.001 |
| 1392649_at   | AI030616  | F-box only protein 21 (predicted)                      | Fbxo21_predicted | 0.673 | 0.361 | 0.655  | 0.991 | 1.090 | 0.750 | 1.001 | 0.995 |
| 1376602_a_at | AI030899  | F-box only protein 22                                  | Fbxo22           | 0.866 | 0.071 | 1.091  | 0.612 | 1.204 | 0.054 | 1.190 | 0.156 |
| 1379401_a_at | AW918372  | F-box only protein 33 (predicted)                      | Fbxo33_predicted | 0.463 | 0.096 | 0.701  | 0.180 | 0.551 | 0.053 | 0.599 | 0.164 |
| 1383354_a_at | BF566664  | F-box only protein 33 (predicted)                      | Fbxo33_predicted | 0.686 | 0.170 | 0.585  | 0.061 | 0.644 | 0.208 | 0.512 | 0.022 |
| 1381903_at   | AW533341  | F-box only protein 33 (predicted)                      | Fbxo33_predicted | 0.735 | 0.276 | 0.796  | 0.053 | 0.684 | 0.301 | 0.690 | 0.080 |
| 1372662_at   | AI176698  | F-box only protein 34 (predicted)                      | Fbxo34_predicted | 0.582 | 0.050 | 0.917  | 0.582 | 0.671 | 0.003 | 0.900 | 0.405 |
| 1384364_at   | AW521356  | F-box only protein 4 (predicted)                       | Fbxo4_predicted  | 1.036 | 0.592 | 1.406  | 0.037 | 1.113 | 0.528 | 1.276 | 0.069 |
| 1384988_at   | BM385403  | F-box only protein 5 (predicted)                       | Fbxo5_predicted  | 1.006 | 0.996 | 1.353  | 0.708 | 1.002 | 0.489 | 1.002 | 0.962 |
| 1370820_at   | AF393484  | F-box only protein 6b                                  | Fbxo6b           | 1.303 | 0.700 | 2.475  | 0.018 | 1.339 | 0.044 | 3.197 | 0.011 |
| 1399133_at   | AW520767  | F-box only protein 7                                   | Fbxo7            | 1.523 | 0.073 | 2.837  | 0.001 | 1.636 | 0.019 | 2.426 | 0.001 |
| 1373835_at   | AI009785  | F-box only protein 8                                   | Fbxo8            | 0.758 | 0.642 | 0.497  | 0.073 | 0.637 | 0.061 | 0.624 | 0.002 |
| 1388470_at   | AA892772  | F-box only protein 9                                   | Fbxo9            | 0.509 | 0.018 | 0.399  | 0.003 | 0.412 | 0.091 | 0.511 | 0.012 |
| 1376561_at   | AW523739  | F-box protein 16                                       | Fbxo16           | 0.151 | 0.039 | 0.563  | 0.274 | 0.143 | 0.023 | 0.449 | 0.002 |

|              |           |                                                                                                                                                                                                            |                   |       |       |        |       |        |       |       |       |
|--------------|-----------|------------------------------------------------------------------------------------------------------------------------------------------------------------------------------------------------------------|-------------------|-------|-------|--------|-------|--------|-------|-------|-------|
| 1382059_at   | BI289529  | F-box protein 30                                                                                                                                                                                           | Fbxo30            | 1.324 | 0.063 | 2.910  | 0.000 | 1.381  | 0.156 | 2.315 | 0.001 |
| 1392747_at   | AI030920  | F-box protein 30                                                                                                                                                                                           | Fbxo30            | 0.911 | 0.691 | 2.797  | 0.000 | 0.823  | 0.090 | 1.704 | 0.027 |
| 1372873_at   | BM385705  | F-box protein 38 (predicted)                                                                                                                                                                               | Fbxo38_predicted  | 0.725 | 0.007 | 0.537  | 0.002 | 0.782  | 0.009 | 0.653 | 0.003 |
| 1381228_at   | AI073001  | F-box protein 39                                                                                                                                                                                           | Fbxo39            | 8.031 | 0.018 | 2.234  | 0.032 | 21.814 | 0.001 | 5.556 | 0.000 |
| 1384502_at   | BI290539  | F-box protein 42 (predicted)                                                                                                                                                                               | Fbxo42_predicted  | 1.859 | 0.139 | 2.325  | 0.015 | 0.516  | 0.251 | 0.795 | 0.972 |
| 1383544_at   | AI385372  | FCH and double SH3 domains 1 (predicted)                                                                                                                                                                   | Fchsd1_predicted  | 1.453 | 0.522 | 2.383  | 0.017 | 0.999  | 0.620 | 1.288 | 0.187 |
| 1389074_at   | AI232737  | FCH and double SH3 domains 2 (predicted)                                                                                                                                                                   | Fchsd2_predicted  | 1.145 | 0.382 | 1.357  | 0.016 | 0.987  | 0.920 | 1.083 | 0.281 |
| 1384067_at   | BF288361  | FCH domain only 2 (predicted)                                                                                                                                                                              | Fcho2_predicted   | 1.689 | 0.138 | 1.714  | 0.557 | 1.006  | 0.998 | 1.815 | 0.677 |
| 1395222_at   | BF287049  | FCH domain only 2 (predicted)                                                                                                                                                                              | Fcho2_predicted   | 1.631 | 0.201 | 1.024  | 0.388 | 1.886  | 0.040 | 1.137 | 0.272 |
| 1398098_at   | AW522192  | FCH domain only 2 (predicted)                                                                                                                                                                              | Fcho2_predicted   | 1.439 | 0.478 | 1.797  | 0.006 | 2.085  | 0.589 | 1.273 | 0.593 |
| 1393722_at   | BE108945  | fem-1 homolog c (C.elegans) (predicted)                                                                                                                                                                    | Fem1c_predicted   | 1.155 | 0.815 | 1.823  | 0.135 | 0.710  | 0.581 | 1.182 | 0.120 |
| 1398417_at   | BE104341  | feminization 1 homolog a (C. elegans)                                                                                                                                                                      | Fem1a             | 0.661 | 0.700 | 0.895  | 0.944 | 0.787  | 0.341 | 0.740 | 0.067 |
| 1372054_at   | BG380399  | Feminization 1 homolog a (C. elegans)                                                                                                                                                                      | Fem1a             | 0.665 | 0.880 | 0.460  | 0.460 | 0.494  | 0.032 | 0.490 | 0.133 |
| 1393843_at   | AI071911  | feminization 1 homolog b (C. elegans) (predicted)                                                                                                                                                          | Fem1b_predicted   | 0.319 | 0.015 | 3.152  | 0.031 | 0.130  | 0.002 | 1.567 | 0.023 |
| 1386643_at   | BF552914  | feminization 1 homolog b (C. elegans) (predicted)                                                                                                                                                          | Fem1b_predicted   | 1.021 | 0.698 | 2.334  | 0.044 | 0.888  | 0.159 | 0.666 | 0.013 |
| 1375402_at   | BF391604  | FERM domain containing 4A (predicted)                                                                                                                                                                      | Frmd4a_predicted  | 1.500 | 0.994 | 1.607  | 0.741 | 1.666  | 0.954 | 1.029 | 0.623 |
| 1390464_at   | BI291381  | FERM domain containing 4B                                                                                                                                                                                  | Frmd4b            | 4.398 | 0.052 | 3.094  | 0.050 | 3.065  | 0.085 | 4.809 | 0.038 |
| 1378492_at   | BF396209  | FERM, RhoGEF (Arhgef) and pleckstrin domain protein 1 (chondrocyte-derived) (predicted)                                                                                                                    | Farp1_predicted   | 1.322 | 0.025 | 1.345  | 0.015 | 1.222  | 0.302 | 1.484 | 0.044 |
| 1391017_at   | AI058490  | FERM, RhoGEF (Arhgef) and pleckstrin domain protein 1 (chondrocyte-derived) (predicted)                                                                                                                    | Farp1_predicted   | 1.022 | 0.803 | 1.003  | 0.915 | 1.329  | 0.286 | 1.000 | 0.854 |
| 1374239_at   | BI282835  | FERM, RhoGEF and pleckstrin domain protein 2 (predicted)                                                                                                                                                   | Farp2_predicted   | 0.821 | 0.336 | 0.578  | 0.015 | 1.063  | 0.551 | 0.556 | 0.001 |
| 1391798_at   | BF564518  | FERM, RhoGEF and pleckstrin domain protein 2 (predicted)                                                                                                                                                   | Farp2_predicted   | 1.275 | 0.404 | 1.330  | 0.738 | 0.927  | 0.811 | 0.929 | 0.131 |
| 1389827_at   | AI408556  | Ferredoxin 1                                                                                                                                                                                               | Fdx1              | 0.632 | 0.033 | 1.021  | 0.983 | 0.553  | 0.006 | 1.199 | 0.023 |
| 1368336_at   | NM_017126 | ferredoxin 1                                                                                                                                                                                               | Fdx1              | 0.471 | 0.267 | 1.378  | 0.274 | 0.524  | 0.002 | 1.112 | 0.437 |
| 1367559_at   | L01122    | ferritin light chain 1                                                                                                                                                                                     | Ftl1              | 0.904 | 0.933 | 2.412  | 0.002 | 0.673  | 0.019 | 2.089 | 0.002 |
| 1367565_a_at | NM_012848 | ferritin, heavy polypeptide 1                                                                                                                                                                              | Fth1              | 0.903 | 0.571 | 1.055  | 0.373 | 0.831  | 0.074 | 1.028 | 0.829 |
| 1390388_at   | BF283951  | ferrochelatae (predicted)                                                                                                                                                                                  | Fech_predicted    | 0.595 | 0.206 | 0.708  | 0.044 | 0.772  | 0.060 | 1.174 | 0.392 |
| 1375347_at   | BE107103  | Fetal Alzheimer antigen (predicted)                                                                                                                                                                        | Falz_predicted    | 1.049 | 0.032 | 0.871  | 0.159 | 0.928  | 0.609 | 0.815 | 0.282 |
| 1390616_at   | BI296731  | Fetal Alzheimer antigen (predicted)                                                                                                                                                                        | Falz_predicted    | 1.002 | 0.607 | 1.001  | 0.993 | 0.880  | 0.844 | 0.998 | 0.977 |
| 1376182_at   | BM383074  | Fetal Alzheimer antigen (predicted)                                                                                                                                                                        | Falz_predicted    | 1.102 | 0.643 | 0.759  | 0.072 | 0.701  | 0.331 | 0.796 | 0.009 |
| 1370203_at   | AI408972  | FGF receptor activating protein 1                                                                                                                                                                          | Frag1             | 1.415 | 0.196 | 1.787  | 0.119 | 1.610  | 0.175 | 1.188 | 0.392 |
| 1370204_at   | BG373817  | FGF receptor activating protein 1                                                                                                                                                                          | Frag1             | 0.996 | 0.947 | 1.452  | 0.070 | 0.943  | 0.830 | 0.999 | 0.981 |
| 1385727_at   | BE107623  | FGFR1 oncogene partner 2                                                                                                                                                                                   | Fgfr1op2          | 1.576 | 0.033 | 3.591  | 0.012 | 1.693  | 0.083 | 2.064 | 0.067 |
| 1393829_at   | AI639475  | FGFR1 oncogene partner 2                                                                                                                                                                                   | Fgfr1op2          | 1.535 | 0.246 | 1.473  | 0.161 | 1.217  | 0.251 | 1.188 | 0.056 |
| 1388528_at   | AW433875  | fibrillarlin                                                                                                                                                                                               | Fbl               | 0.628 | 0.770 | 2.656  | 0.005 | 0.597  | 0.011 | 2.101 | 0.039 |
| 1370511_at   | U05675    | fibrinogen, B beta polypeptide                                                                                                                                                                             | Fgb               | 4.230 | 0.042 | 10.327 | 0.018 | 1.487  | 0.278 | 3.095 | 0.177 |
| 1370086_at   | NM_012559 | fibrinogen, gamma polypeptide                                                                                                                                                                              | Fgg               | 1.544 | 0.242 | 4.916  | 0.059 | 5.977  | 0.081 | 5.878 | 0.039 |
| 1383516_at   | BG663284  | fibrinogen-like 2                                                                                                                                                                                          | Fgl2              | 1.856 | 0.084 | 0.824  | 0.118 | 0.869  | 0.027 | 0.976 | 0.311 |
| 1392894_at   | AI716194  | fibrinogen-like 2                                                                                                                                                                                          | Fgl2              | 1.355 | 0.441 | 0.168  | 0.003 | 0.906  | 0.202 | 0.232 | 0.017 |
| 1399072_at   | BI283002  | fibroblast growth factor (acidic) intracellular binding protein                                                                                                                                            | Fibp              | 0.498 | 0.079 | 0.417  | 0.003 | 0.570  | 0.026 | 0.673 | 0.111 |
| 1387606_at   | NM_019305 | fibroblast growth factor 2                                                                                                                                                                                 | Fgf2              | 1.056 | 0.942 | 0.883  | 0.121 | 0.913  | 0.246 | 0.715 | 0.057 |
| 1370747_at   | D14839    | fibroblast growth factor 9                                                                                                                                                                                 | Fgf9              | 0.999 | 0.375 | 1.002  | 0.995 | 0.816  | 0.174 | 1.000 | 0.990 |
| 1384056_at   | BF410980  | Fibroblast growth factor receptor 3                                                                                                                                                                        | Fgfr3             | 0.974 | 0.875 | 0.713  | 0.024 | 1.027  | 0.329 | 0.731 | 0.008 |
| 1389801_at   | BF391339  | fibroblast growth factor receptor 4                                                                                                                                                                        | Fgfr4             | 0.308 | 0.088 | 0.438  | 0.194 | 0.741  | 0.102 | 0.644 | 0.234 |
| 1370234_at   | AA893484  | fibronectin 1                                                                                                                                                                                              | Fn1               | 0.361 | 0.178 | 0.061  | 0.000 | 0.440  | 0.029 | 0.051 | 0.000 |
| 1378057_at   | BE103354  | fibronectin leucine rich transmembrane protein 3 (predicted)                                                                                                                                               | Flrt3_predicted   | 1.002 | 0.998 | 0.997  | 0.975 | 1.008  | 0.840 | 0.695 | 0.938 |
| 1383396_at   | AA894079  | fibronectin type III domain containing 3a (predicted)                                                                                                                                                      | Fndc3a_predicted  | 1.359 | 0.005 | 0.833  | 0.009 | 1.800  | 0.002 | 1.150 | 0.216 |
| 1376823_at   | AI599269  | Fibronectin type III domain containing 3a (predicted)                                                                                                                                                      | Fndc3a_predicted  | 0.989 | 0.477 | 0.670  | 0.010 | 0.649  | 0.842 | 0.783 | 0.144 |
| 1373206_at   | BI289093  | fibronectin type III domain containing 3B (predicted)                                                                                                                                                      | Fndc3b_predicted  | 1.114 | 0.578 | 1.680  | 0.019 | 0.898  | 0.859 | 1.255 | 0.095 |
| 1373416_at   | AI176320  | fibronectin type III domain containing 3B (predicted)                                                                                                                                                      | Fndc3b_predicted  | 1.420 | 0.739 | 1.570  | 0.048 | 0.996  | 0.755 | 1.290 | 0.983 |
| 1391085_at   | BE118077  | Fibronigen-like protein 1                                                                                                                                                                                  | Fgl1              | 0.710 | 0.261 | 0.349  | 0.014 | 0.726  | 0.678 | 0.488 | 0.016 |
| 1389533_at   | AA944398  | fibulin 2                                                                                                                                                                                                  | Fbln2             | 1.153 | 0.413 | 1.545  | 0.135 | 1.016  | 0.957 | 1.108 | 0.379 |
| 1378804_at   | BE098265  | Fidgetin (predicted)                                                                                                                                                                                       | Fign_predicted    | 1.641 | 0.060 | 1.354  | 0.427 | 1.855  | 0.086 | 1.137 | 0.149 |
| 1379463_at   | AW525176  | filamin A interacting protein 1                                                                                                                                                                            | Filip1            | 0.223 | 0.001 | 0.178  | 0.000 | 0.056  | 0.010 | 0.210 | 0.051 |
| 1375089_at   | BF411781  | filamin A interacting protein 1                                                                                                                                                                            | Filip1            | 0.402 | 0.059 | 0.157  | 0.026 | 0.405  | 0.059 | 0.156 | 0.025 |
| 1373286_at   | AA875261  | filamin binding LIM protein 1                                                                                                                                                                              | Fblim1            | 3.157 | 0.001 | 3.510  | 0.044 | 1.559  | 0.028 | 1.341 | 0.377 |
| 1391827_at   | AI013675  | filamin, beta (predicted)                                                                                                                                                                                  | Flnb_predicted    | 1.490 | 0.014 | 1.076  | 0.707 | 0.731  | 0.952 | 1.350 | 0.886 |
| 1371316_at   | AI177362  | Finkel-Biskis-Reilly murine sarcoma virus (FBR-MuSV) ubiquitously expressed (fox derived) protein /// similar to Finkel-Biskis-Reilly murine sarcoma virus (FBR-MuSV) ubiquitously expressed (fox derived) | Fau /// LOC499305 | 0.806 | 0.272 | 1.169  | 0.148 | 0.787  | 0.006 | 0.928 | 0.657 |
| 1389621_at   | BE113454  | FIP1 like 1 (S. cerevisiae)                                                                                                                                                                                | Fip1l1            | 0.795 | 0.253 | 1.744  | 0.014 | 0.654  | 0.093 | 1.692 | 0.003 |
| 1371594_at   | AA892378  | fission 1 (mitochondrial outer membrane) homolog (yeast)                                                                                                                                                   | Fis1              | 0.723 | 0.542 | 0.834  | 0.507 | 0.621  | 0.048 | 0.990 | 0.338 |
| 1375546_at   | AI009616  | fizzy/cell division cycle 20 related 1 (Drosophila) (predicted)                                                                                                                                            | Fzr1_predicted    | 1.024 | 0.851 | 1.500  | 0.217 | 1.463  | 0.105 | 1.247 | 0.405 |

|              |           |                                                              |                     |       |       |       |       |       |       |       |       |
|--------------|-----------|--------------------------------------------------------------|---------------------|-------|-------|-------|-------|-------|-------|-------|-------|
| 1372653_at   | BI276210  | FK506 binding protein 11                                     | Fkbp11              | 0.482 | 0.219 | 0.738 | 0.045 | 0.656 | 0.067 | 0.648 | 0.080 |
| 1368019_at   | NM_019906 | FK506 binding protein 12-rapamycin associated protein 1      | Frap1               | 0.589 | 0.135 | 0.961 | 0.711 | 0.640 | 0.183 | 0.875 | 0.941 |
| 1383976_at   | AW527549  | FK506 binding protein 14                                     | Fkbp14              | 1.151 | 0.371 | 0.629 | 0.050 | 2.790 | 0.162 | 0.886 | 0.154 |
| 1372525_at   | AI227721  | FK506 binding protein 14                                     | Fkbp14              | 1.119 | 0.842 | 0.645 | 0.043 | 0.632 | 0.781 | 1.042 | 0.713 |
| 1369621_s_at | NM_053308 | FK506 binding protein 1a                                     | Fkbp1a              | 1.138 | 0.585 | 1.577 | 0.401 | 0.739 | 0.296 | 0.993 | 0.399 |
| 1398829_at   | AI598372  | FK506 binding protein 1a                                     | Fkbp1a              | 0.944 | 0.598 | 1.042 | 0.045 | 0.786 | 0.667 | 1.042 | 0.118 |
| 1398828_at   | U09386    | FK506 binding protein 1a                                     | Fkbp1a              | 1.187 | 0.644 | 1.682 | 0.005 | 0.846 | 0.957 | 1.535 | 0.009 |
| 1392479_at   | AA925694  | FK506 binding protein 1a                                     | Fkbp1a              | 1.176 | 0.719 | 1.131 | 0.439 | 1.278 | 0.806 | 0.779 | 0.020 |
| 1380500_s_at | BF561706  | FK506 binding protein 2 (predicted)                          | Fkbp2_predicted     | 0.922 | 0.363 | 0.829 | 0.189 | 0.848 | 0.258 | 0.754 | 0.183 |
| 1375669_at   | BI285619  | FK506 binding protein 2 (predicted)                          | Fkbp2_predicted     | 0.759 | 0.547 | 0.733 | 0.013 | 0.705 | 0.077 | 0.713 | 0.076 |
| 1380501_x_at | BF561706  | FK506 binding protein 2 (predicted)                          | Fkbp2_predicted     | 1.030 | 0.916 | 1.229 | 0.125 | 0.973 | 1.000 | 1.076 | 0.282 |
| 1378291_at   | BF549558  | FK506 binding protein 3 (predicted)                          | Fkbp3_predicted     | 0.686 | 0.077 | 0.590 | 0.090 | 1.008 | 0.302 | 0.359 | 0.046 |
| 1388882_at   | AA891798  | FK506 binding protein 3 (predicted)                          | Fkbp3_predicted     | 0.712 | 0.091 | 0.774 | 0.253 | 0.878 | 0.170 | 0.905 | 0.101 |
| 1392567_at   | AI556652  | FK506 binding protein 3 (predicted)                          | Fkbp3_predicted     | 1.216 | 0.463 | 1.002 | 0.989 | 1.285 | 0.394 | 1.338 | 0.369 |
| 1389844_at   | BE113154  | FK506 binding protein 4                                      | Fkbp4               | 0.352 | 0.077 | 2.537 | 0.007 | 0.219 | 0.003 | 1.757 | 0.029 |
| 1388901_at   | AW534837  | FK506 binding protein 5                                      | Fkbp5               | 1.003 | 0.994 | 1.262 | 0.101 | 1.076 | 0.278 | 1.232 | 0.086 |
| 1380611_at   | BI284255  | FK506 binding protein 5                                      | Fkbp5               | 1.002 | 0.996 | 4.470 | 0.035 | 0.529 | 0.037 | 3.392 | 0.194 |
| 1384344_at   | AI060231  | FK506 binding protein 7 (predicted)                          | Fkbp7_predicted     | 0.378 | 0.002 | 0.250 | 0.006 | 0.237 | 0.025 | 0.480 | 0.009 |
| 1371528_at   | BI274519  | FK506 binding protein 8                                      | Fkbp8               | 0.873 | 0.281 | 1.221 | 0.796 | 1.282 | 0.012 | 1.046 | 0.666 |
| 1390995_at   | BF389385  | FK506 binding protein-like                                   | Fkbp1               | 1.176 | 0.125 | 1.555 | 0.628 | 0.537 | 0.025 | 1.585 | 0.711 |
| 1392320_s_at | AI763657  | FKBP-associated protein                                      | Glmn                | 0.372 | 0.011 | 1.243 | 0.481 | 1.046 | 0.312 | 1.373 | 0.026 |
| 1381564_at   | AI763657  | FKBP-associated protein                                      | Glmn                | 0.602 | 0.145 | 1.253 | 0.191 | 1.399 | 0.306 | 1.305 | 0.116 |
| 1379885_at   | BF282998  | flavin containing monooxygenase 4                            | Fmo4                | 0.997 | 0.327 | 0.993 | 0.955 | 1.080 | 0.639 | 1.043 | 0.365 |
| 1395026_at   | BI293319  | flavin containing monooxygenase 4                            | Fmo4                | 1.015 | 0.777 | 1.002 | 0.975 | 1.016 | 0.941 | 1.283 | 0.185 |
| 1383248_at   | AI454611  | flavin containing monooxygenase 5                            | Fmo5                | 0.900 | 0.239 | 0.537 | 0.132 | 0.847 | 0.242 | 0.534 | 0.132 |
| 1372113_at   | AA850662  | flightless I homolog (Drosophila)                            | Fliih               | 0.992 | 0.962 | 0.900 | 0.092 | 0.899 | 0.531 | 0.933 | 0.193 |
| 1373757_at   | AW529298  | FLN29 gene product                                           | Fln29               | 3.128 | 0.006 | 0.989 | 0.181 | 4.934 | 0.007 | 1.580 | 0.005 |
| 1368241_a_at | NM_022701 | flotillin 1                                                  | Flot1               | 0.915 | 0.602 | 0.980 | 0.741 | 1.144 | 0.691 | 1.437 | 0.120 |
| 1367746_a_at | NM_031830 | flotillin 2                                                  | Flot2               | 1.638 | 0.037 | 1.857 | 0.001 | 1.797 | 0.002 | 1.870 | 0.010 |
| 1374878_at   | H35236    | Fms interacting protein                                      | Fmip                | 0.637 | 0.076 | 1.489 | 0.069 | 0.749 | 0.095 | 1.657 | 0.064 |
| 1393145_at   | AA899892  | follicular lymphoma variant translocation 1 (predicted)      | Fvt1_predicted      | 1.140 | 0.063 | 1.009 | 0.955 | 0.931 | 0.588 | 1.013 | 0.925 |
| 1396826_at   | AW522542  | Follicular lymphoma variant translocation 1 (predicted)      | Fvt1_predicted      | 0.878 | 0.622 | 1.551 | 0.740 | 1.126 | 0.788 | 0.760 | 0.494 |
| 1372526_at   | BI278582  | folliculin                                                   | Flcn                | 1.336 | 0.012 | 2.202 | 0.000 | 1.209 | 0.013 | 1.850 | 0.005 |
| 1368821_at   | NM_024369 | follistatin-like 1                                           | Fstl1               | 0.862 | 0.148 | 0.999 | 0.147 | 0.854 | 0.383 | 0.999 | 0.976 |
| 1368822_at   | BI290885  | follistatin-like 1                                           | Fstl1               | 1.393 | 0.743 | 1.143 | 0.937 | 1.893 | 0.193 | 1.090 | 0.780 |
| 1396896_at   | AW524895  | follistatin-like 4 (predicted)                               | Fstl4_predicted     | 2.088 | 0.631 | 1.177 | 0.525 | 1.943 | 0.145 | 0.933 | 0.457 |
| 1395882_at   | AW527138  | Follistatin-like 4 (predicted)                               | Fstl4_predicted     | 1.667 | 0.739 | 1.052 | 0.941 | 1.580 | 0.076 | 1.881 | 0.997 |
| 1381272_at   | BE120246  | Follistatin-like 4 (predicted)                               | Fstl4_predicted     | 0.898 | 0.814 | 1.106 | 0.199 | 0.935 | 0.626 | 1.316 | 0.478 |
| 1368711_at   | NM_012743 | forkhead box A2                                              | Foxa2               | 1.283 | 0.300 | 1.068 | 0.215 | 0.743 | 0.012 | 1.241 | 0.072 |
| 1374969_at   | AA799832  | forkhead box D4                                              | Foxd4               | 0.657 | 0.244 | 0.455 | 0.005 | 0.612 | 0.008 | 0.542 | 0.026 |
| 1377347_at   | AW531892  | Forkhead box J3 (predicted)                                  | Foxj3_predicted     | 0.610 | 0.335 | 2.464 | 0.005 | 0.798 | 0.172 | 2.148 | 0.004 |
| 1396965_at   | BF406350  | Forkhead box O1A                                             | Foxo1a              | 0.846 | 0.443 | 0.690 | 0.095 | 1.281 | 0.013 | 0.912 | 0.276 |
| 1394691_at   | AA924778  | forkhead box P1                                              | Foxp1               | 0.732 | 0.043 | 0.996 | 0.297 | 1.434 | 0.932 | 1.006 | 0.983 |
| 1373804_at   | AI230954  | forkhead box P1                                              | Foxp1               | 0.759 | 0.581 | 1.056 | 0.192 | 1.655 | 0.523 | 1.305 | 0.381 |
| 1378495_at   | BF414427  | Forkhead box P1                                              | Foxp1               | 1.143 | 0.604 | 0.997 | 0.997 | 0.958 | 0.890 | 1.005 | 0.985 |
| 1393676_at   | BE106495  | Forkhead box P1                                              | Foxp1               | 1.057 | 0.749 | 0.636 | 0.051 | 1.134 | 0.451 | 0.628 | 0.129 |
| 1398075_at   | BF418304  | Forkhead box P1                                              | Foxp1               | 1.006 | 0.985 | 1.000 | 0.994 | 1.010 | 0.976 | 1.009 | 0.628 |
| 1378793_at   | BE121233  | Forkhead box P4 (predicted)                                  | Foxp4_predicted     | 1.173 | 0.030 | 1.754 | 0.640 | 1.393 | 0.165 | 1.262 | 0.471 |
| 1398402_at   | AW144081  | forkhead box P4 (predicted)                                  | Foxp4_predicted     | 2.302 | 0.107 | 1.253 | 0.216 | 2.481 | 0.043 | 1.053 | 0.077 |
| 1385464_at   | AI070944  | Forkhead box Q1                                              | Foxq1               | 2.987 | 0.003 | 3.259 | 0.001 | 2.844 | 0.040 | 3.141 | 0.003 |
| 1368550_at   | NM_022858 | forkhead box Q1 /// hypothetical gene supported by NM_022858 | Foxq1 /// LOC497713 | 2.054 | 0.007 | 1.813 | 0.006 | 2.261 | 0.028 | 2.243 | 0.002 |
| 1376589_at   | BG380345  | forkhead box R1 (predicted)                                  | Foxr1_predicted     | 0.685 | 0.321 | 1.378 | 0.001 | 0.657 | 0.012 | 1.288 | 0.025 |
| 1376992_a_at | AI058900  | forkhead box R1 (predicted)                                  | Foxr1_predicted     | 0.785 | 0.483 | 0.728 | 0.022 | 1.077 | 0.983 | 0.745 | 0.015 |
| 1377258_at   | BE107204  | Forkhead box R1 (predicted)                                  | Foxr1_predicted     | 1.130 | 0.970 | 0.648 | 0.273 | 1.048 | 0.840 | 0.917 | 0.846 |
| 1373537_at   | BE113175  | Formin binding protein 1                                     | Fnbp1               | 1.592 | 0.072 | 0.986 | 0.868 | 2.173 | 0.068 | 1.101 | 0.998 |
| 1388684_at   | BI274480  | formin binding protein 4                                     | Fnbp4               | 2.294 | 0.009 | 2.708 | 0.002 | 2.460 | 0.014 | 2.577 | 0.001 |
| 1376470_at   | BG372703  | formin binding protein 4                                     | Fnbp4               | 1.269 | 0.311 | 0.847 | 0.093 | 2.511 | 0.067 | 1.034 | 0.962 |
| 1397517_at   | BF404640  | formin binding protein 4                                     | Fnbp4               | 0.737 | 0.398 | 1.044 | 0.713 | 0.506 | 0.990 | 1.661 | 0.061 |
| 1384945_at   | AI501447  | forty-two-three domain containing 1                          | Fytd1               | 0.767 | 0.334 | 1.167 | 0.312 | 0.674 | 0.816 | 0.808 | 0.175 |
| 1383098_at   | BG667845  | forty-two-three domain containing 1                          | Fytd1               | 0.979 | 0.804 | 0.641 | 0.005 | 0.958 | 0.816 | 0.446 | 0.002 |
| 1368489_at   | NM_012953 | fos-like antigen 1                                           | Fosl1               | 2.168 | 0.001 | 1.380 | 0.200 | 1.156 | 0.294 | 1.249 | 0.244 |

|              |           |                                                                         |                   |        |       |        |       |       |       |       |       |
|--------------|-----------|-------------------------------------------------------------------------|-------------------|--------|-------|--------|-------|-------|-------|-------|-------|
| 1372107_at   | BG673187  | four and a half LIM domains 1                                           | Fhl1              | 1.043  | 0.672 | 0.944  | 0.157 | 1.047 | 0.377 | 0.859 | 0.164 |
| 1369313_at   | NM_031677 | four and a half LIM domains 2                                           | Fhl2              | 15.199 | 0.047 | 19.798 | 0.005 | 1.677 | 0.228 | 1.458 | 0.085 |
| 1382267_at   | BF390450  | four jointed box 1 (Drosophila) (predicted)                             | Fjx1_predicted    | 1.201  | 0.165 | 1.001  | 0.981 | 1.218 | 0.425 | 1.148 | 0.175 |
| 1368977_a_at | AF061242  | fractured callus expressed transcript 1                                 | Fxc1              | 0.664  | 0.000 | 0.500  | 0.037 | 0.701 | 0.002 | 0.691 | 0.056 |
| 1393734_at   | AA997025  | Fractured callus expressed transcript 1                                 | Fxc1              | 0.412  | 0.018 | 0.780  | 0.057 | 0.431 | 0.034 | 0.999 | 0.735 |
| 1383236_at   | BE118678  | fragile X mental retardation gene 1, autosomal homolog                  | Fxr1h             | 0.966  | 0.929 | 1.899  | 0.011 | 0.922 | 0.784 | 2.229 | 0.054 |
| 1378054_at   | BE108397  | fragile X mental retardation gene 1, autosomal homolog                  | Fxr1h             | 0.901  | 0.953 | 1.758  | 0.089 | 0.725 | 0.073 | 1.397 | 0.015 |
| 1373435_at   | BG373419  | fragile X mental retardation gene 2, autosomal homolog (predicted)      | Fxr2h_predicted   | 1.097  | 0.411 | 2.068  | 0.011 | 0.851 | 0.726 | 1.670 | 0.023 |
| 1394707_at   | AW533764  | Fragile X mental retardation gene 2, autosomal homolog (predicted)      | Fxr2h_predicted   | 1.015  | 0.971 | 0.960  | 0.966 | 1.176 | 0.517 | 0.979 | 0.914 |
| 1393459_at   | AI705393  | fragile X mental retardation syndrome 1 homolog                         | Fmr1              | 1.233  | 0.315 | 1.078  | 0.470 | 1.478 | 0.014 | 1.461 | 0.135 |
| 1387685_at   | NM_024366 | frequenin homolog (Drosophila)                                          | Freq              | 1.409  | 0.983 | 1.069  | 0.680 | 1.029 | 0.963 | 1.099 | 0.276 |
| 1390914_at   | AI071474  | Friend leukemia integration 1                                           | Fli1              | 0.966  | 0.899 | 0.997  | 0.954 | 0.971 | 0.928 | 0.992 | 0.053 |
| 1388994_at   | AW917849  | Frizzled homolog 6 (Drosophila)                                         | Fzd6              | 0.937  | 0.399 | 0.471  | 0.001 | 0.905 | 0.278 | 0.638 | 0.009 |
| 1375961_at   | AI072892  | frizzled-related protein                                                | Frzb              | 0.446  | 0.001 | 0.199  | 0.001 | 0.555 | 0.002 | 0.201 | 0.042 |
| 1373615_at   | BM391538  | frizzled-related protein                                                | Frzb              | 0.669  | 0.373 | 0.219  | 0.101 | 0.423 | 0.030 | 0.180 | 0.063 |
| 1368077_at   | NM_012558 | fructose-1,6- biphosphatase 1                                           | Fbp1              | 1.096  | 0.953 | 1.000  | 0.970 | 4.089 | 0.003 | 1.061 | 0.749 |
| 1385601_at   | BE115019  | FSDH region gene 1 (predicted)                                          | Frg1_predicted    | 0.732  | 0.563 | 0.791  | 0.241 | 0.674 | 0.064 | 1.039 | 0.621 |
| 1393914_at   | AI709526  | Ftsj homolog 1 (E. coli) (predicted)                                    | Ftsj1_predicted   | 1.004  | 0.842 | 0.652  | 0.038 | 1.001 | 0.968 | 0.662 | 0.141 |
| 1376512_at   | BI290160  | FtsJ homolog 2 (E. coli) (predicted)                                    | Ftsj2_predicted   | 0.353  | 0.020 | 0.993  | 0.928 | 0.480 | 0.012 | 1.000 | 0.993 |
| 1374288_at   | BG374267  | FtsJ homolog 3 (E. coli)                                                | Ftsj3             | 0.511  | 0.028 | 1.303  | 0.182 | 0.761 | 0.103 | 1.316 | 0.270 |
| 1376753_at   | BE105571  | Fucose-1-phosphate guanylyltransferase                                  | Fpgt              | 0.777  | 0.420 | 0.600  | 0.012 | 0.880 | 0.037 | 0.689 | 0.078 |
| 1392351_at   | BI288242  | fucose-1-phosphate guanylyltransferase                                  | Fpgt              | 0.903  | 0.628 | 1.652  | 0.029 | 1.374 | 0.759 | 0.999 | 0.897 |
| 1367737_at   | NM_012562 | fucosidase, alpha-L- 1, tissue                                          | Fuca              | 0.570  | 0.344 | 0.277  | 0.000 | 0.656 | 0.013 | 0.388 | 0.010 |
| 1376249_at   | BM389993  | fucosidase, alpha-L- 2, plasma                                          | Fuca2             | 0.452  | 0.043 | 0.345  | 0.012 | 0.447 | 0.019 | 0.343 | 0.001 |
| 1368709_at   | NM_031236 | fucosyltransferase 1                                                    | Fut1              | 0.597  | 0.663 | 0.405  | 0.019 | 0.285 | 0.019 | 0.492 | 0.027 |
| 1387097_at   | NM_031635 | fucosyltransferase 2 (secretor status included)                         | Fut2              | 0.772  | 0.117 | 0.835  | 0.076 | 0.978 | 0.253 | 1.072 | 0.986 |
| 1388643_at   | AI177839  | fucosyltransferase 8 (alpha (1,6) fucosyltransferase)                   | Fut8              | 0.972  | 0.550 | 0.991  | 0.927 | 0.967 | 0.265 | 0.793 | 0.312 |
| 1379263_at   | AW251362  | fukutin related protein                                                 | Fkrp              | 0.314  | 0.039 | 0.448  | 0.007 | 0.715 | 0.014 | 0.453 | 0.079 |
| 1375872_at   | AI144944  | Fukuyama type congenital muscular dystrophy homolog (human) (predicted) | Fcmd_predicted    | 0.592  | 0.069 | 0.690  | 0.010 | 0.486 | 0.013 | 0.691 | 0.046 |
| 1375785_at   | AI101490  | Fukuyama type congenital muscular dystrophy homolog (human) (predicted) | Fcmd_predicted    | 0.658  | 0.403 | 0.676  | 0.180 | 0.502 | 0.027 | 0.619 | 0.292 |
| 1367670_at   | NM_017005 | fumarate hydratase 1                                                    | Fh1               | 0.341  | 0.010 | 0.639  | 0.010 | 0.578 | 0.017 | 0.768 | 0.004 |
| 1368092_at   | NM_017181 | fumarylacetoacetate hydrolase                                           | Fah               | 0.256  | 0.033 | 0.407  | 0.121 | 0.607 | 0.128 | 0.684 | 0.100 |
| 1372676_at   | BI275774  | fumarylacetoacetate hydrolase domain containing 1                       | Fahd1             | 0.352  | 0.003 | 0.551  | 0.001 | 0.301 | 0.035 | 1.091 | 0.768 |
| 1373134_at   | BE329450  | fumarylacetoacetate hydrolase domain containing 2A (predicted)          | Fahd2a_predicted  | 0.391  | 0.025 | 0.312  | 0.002 | 0.269 | 0.017 | 0.484 | 0.027 |
| 1373956_at   | BF284313  | FUN14 domain containing 1                                               | Fundc1            | 0.875  | 0.946 | 0.396  | 0.016 | 0.936 | 0.672 | 0.846 | 0.043 |
| 1380269_at   | AA859619  | FUS interacting protein (serine-arginine rich) 1                        | Fusip1            | 0.627  | 0.071 | 1.154  | 0.373 | 0.649 | 0.244 | 0.961 | 0.442 |
| 1383703_at   | BE109151  | FUS interacting protein (serine-arginine rich) 1                        | Fusip1            | 0.700  | 0.194 | 0.809  | 0.100 | 0.800 | 0.088 | 0.666 | 0.049 |
| 1393946_at   | BG377118  | FUS interacting protein (serine-arginine rich) 1                        | Fusip1            | 0.748  | 0.484 | 1.591  | 0.742 | 0.686 | 0.020 | 1.369 | 0.848 |
| 1382052_at   | BF284373  | FUS interacting protein (serine-arginine rich) 1                        | Fusip1            | 0.684  | 0.915 | 1.126  | 0.109 | 1.025 | 0.907 | 1.126 | 0.061 |
| 1385103_at   | BF390999  | fused toes                                                              | Fts               | 0.523  | 0.051 | 0.770  | 0.902 | 0.467 | 0.135 | 0.946 | 0.797 |
| 1373837_at   | BI296633  | fused toes                                                              | Fts               | 0.692  | 0.076 | 0.884  | 0.470 | 0.632 | 0.104 | 0.935 | 0.466 |
| 1375689_at   | BI300470  | Fusion, derived from t(12;16) malignant liposarcoma (human)             | Fus               | 1.698  | 0.030 | 1.180  | 0.117 | 1.526 | 0.108 | 1.070 | 0.539 |
| 1373195_at   | AW532485  | fusion, derived from t(12;16) malignant liposarcoma (human)             | Fus               | 1.072  | 0.634 | 1.260  | 0.132 | 1.069 | 0.996 | 1.212 | 0.102 |
| 1370248_at   | AA851939  | FXYP domain-containing ion transport regulator 6                        | Fxyd6             | 0.524  | 0.171 | 0.073  | 0.000 | 0.521 | 0.067 | 0.092 | 0.026 |
| 1373683_at   | AI230396  | fyn proto-oncogene                                                      | Fyn               | 0.841  | 0.299 | 1.603  | 0.707 | 0.860 | 0.642 | 1.929 | 0.037 |
| 1369156_at   | NM_024368 | fyn-related kinase                                                      | Frk               | 4.715  | 0.022 | 1.388  | 0.047 | 1.337 | 0.366 | 1.007 | 0.239 |
| 1379434_at   | BE100206  | FYVE, RhoGEF and PH domain containing 1                                 | Fgd1              | 0.848  | 0.122 | 1.933  | 0.012 | 0.776 | 0.088 | 1.651 | 0.020 |
| 1376042_at   | BF284673  | FYVE, RhoGEF and PH domain containing 1                                 | Fgd1              | 0.699  | 0.128 | 0.276  | 0.002 | 0.574 | 0.069 | 0.522 | 0.001 |
| 1367756_at   | NM_053625 | G elongation factor                                                     | Gfm               | 0.433  | 0.085 | 0.663  | 0.046 | 0.461 | 0.025 | 0.636 | 0.109 |
| 1379909_at   | AA963315  | G kinase anchoring protein 1                                            | Gkap1             | 1.114  | 0.887 | 1.043  | 0.919 | 0.989 | 0.872 | 0.987 | 0.574 |
| 1397234_at   | AI598507  | G patch domain containing 1 (predicted)                                 | Gpatc1_predicted  | 1.078  | 0.010 | 1.141  | 0.979 | 1.945 | 0.117 | 0.989 | 0.698 |
| 1377436_at   | BE108338  | G patch domain containing 1 (predicted)                                 | Gpatc1_predicted  | 1.157  | 0.584 | 1.048  | 0.589 | 1.350 | 0.756 | 1.431 | 0.141 |
| 1390930_at   | BF406924  | G patch domain containing 2                                             | Gpatc2            | 2.485  | 0.032 | 2.891  | 0.006 | 3.073 | 0.043 | 2.481 | 0.001 |
| 1367963_at   | NM_022404 | G protein beta subunit-like                                             | Gbl               | 0.318  | 0.075 | 1.014  | 0.886 | 1.139 | 0.113 | 0.906 | 0.620 |
| 1398783_at   | NM_053969 | G protein pathway suppressor 1                                          | Gps1              | 0.501  | 0.176 | 0.728  | 0.085 | 0.529 | 0.000 | 0.836 | 0.303 |
| 1373170_at   | BI294756  | G protein pathway suppressor 2 (predicted)                              | Gps2_predicted    | 0.930  | 0.362 | 2.098  | 0.043 | 0.771 | 0.710 | 1.184 | 0.172 |
| 1379956_at   | AI013395  | G protein-coupled receptor 107 (predicted)                              | Gpr107_predicted  | 0.985  | 0.812 | 0.768  | 0.105 | 1.056 | 0.315 | 1.005 | 0.996 |
| 1389188_at   | BE111778  | G protein-coupled receptor 108                                          | Gpr108            | 0.900  | 0.061 | 0.989  | 0.451 | 1.082 | 0.423 | 1.041 | 0.201 |
| 1388109_at   | BI290677  | G protein-coupled receptor 116                                          | Gpr116            | 1.005  | 0.998 | 0.703  | 0.105 | 1.105 | 0.069 | 0.766 | 0.124 |
| 1393148_at   | BF542593  | G protein-coupled receptor 137B (predicted)                             | Gpr137b_predicted | 0.461  | 0.158 | 1.789  | 0.084 | 0.183 | 0.046 | 2.527 | 0.155 |
| 1384747_at   | BF404188  | G protein-coupled receptor 137B (predicted)                             | Gpr137b_predicted | 0.890  | 0.491 | 0.872  | 0.417 | 1.008 | 0.578 | 0.815 | 0.983 |

|              |           |                                                                             |                   |       |       |       |       |       |       |       |       |
|--------------|-----------|-----------------------------------------------------------------------------|-------------------|-------|-------|-------|-------|-------|-------|-------|-------|
| 1397460_at   | BE119491  | G protein-coupled receptor 158 (predicted)                                  | Gpr158_predicted  | 0.966 | 0.894 | 1.100 | 0.226 | 1.054 | 0.743 | 1.048 | 0.320 |
| 1382739_at   | AI045718  | G protein-coupled receptor 19                                               | Gpr19             | 4.260 | 0.019 | 8.113 | 0.000 | 6.004 | 0.000 | 8.436 | 0.000 |
| 1397425_at   | AI172341  | G protein-coupled receptor 21 (predicted)                                   | Gpr21_predicted   | 1.233 | 0.338 | 1.222 | 0.539 | 1.354 | 0.763 | 0.931 | 0.312 |
| 1388004_at   | AF087947  | G protein-coupled receptor 37-like 1                                        | Gpr37l1           | 1.183 | 0.288 | 2.009 | 0.103 | 1.037 | 0.981 | 1.026 | 0.203 |
| 1374934_at   | BF405151  | G protein-coupled receptor 39                                               | Gpr39             | 0.502 | 0.320 | 1.010 | 0.545 | 0.727 | 0.161 | 0.966 | 0.927 |
| 1371696_at   | AI412938  | G protein-coupled receptor 56                                               | Gpr56             | 1.093 | 0.387 | 2.299 | 0.006 | 0.651 | 0.121 | 1.640 | 0.016 |
| 1369792_at   | U12006    | G protein-coupled receptor 6                                                | Gpr6              | 0.135 | 0.002 | 0.087 | 0.000 | 0.122 | 0.001 | 0.059 | 0.014 |
| 1387666_at   | AF203907  | G protein-coupled receptor 85                                               | Gpr85             | 1.075 | 0.147 | 1.076 | 0.805 | 0.597 | 0.130 | 0.984 | 0.609 |
| 1372313_at   | BI275972  | G protein-coupled receptor 89 (predicted)                                   | Gpr89_predicted   | 0.383 | 0.222 | 0.479 | 0.009 | 0.466 | 0.012 | 0.430 | 0.008 |
| 1387148_at   | NM_134386 | G protein-coupled receptor associated sorting protein 1                     | Gprasp1           | 0.426 | 0.027 | 0.569 | 0.043 | 0.447 | 0.062 | 0.574 | 0.009 |
| 1368408_at   | NM_030829 | G protein-coupled receptor kinase 5                                         | Gprk5             | 1.995 | 0.030 | 1.510 | 0.094 | 2.569 | 0.015 | 1.039 | 0.884 |
| 1393987_s_at | BI274742  | G protein-coupled receptor kinase 6                                         | Gprk6             | 1.392 | 0.057 | 1.708 | 0.139 | 1.932 | 0.032 | 1.474 | 0.037 |
| 1368647_at   | NM_031657 | G protein-coupled receptor kinase 6                                         | Gprk6             | 1.756 | 0.120 | 1.957 | 0.275 | 1.139 | 0.674 | 1.137 | 0.835 |
| 1370015_at   | NM_031814 | G protein-coupled receptor kinase interactor 1                              | Git1              | 1.412 | 0.190 | 1.523 | 0.081 | 0.865 | 0.433 | 1.476 | 0.045 |
| 1396596_at   | BF402645  | G protein-coupled receptor kinase-interactor 2                              | Git2              | 1.574 | 0.046 | 1.196 | 0.557 | 1.231 | 0.619 | 0.634 | 0.108 |
| 1389315_at   | AI408598  | G protein-coupled receptor kinase-interactor 2                              | Git2              | 1.024 | 0.495 | 1.598 | 0.048 | 1.721 | 0.829 | 1.128 | 0.113 |
| 1371671_at   | AI228513  | G protein-coupled receptor, family C, group 5, member B (predicted)         | Gprc5b_predicted  | 0.700 | 0.256 | 1.718 | 0.016 | 0.759 | 0.227 | 1.595 | 0.029 |
| 1373693_at   | BF414143  | G protein-coupled receptor, family C, group 5, member C                     | Gprc5c            | 1.016 | 0.850 | 1.001 | 0.288 | 0.832 | 0.029 | 0.999 | 0.963 |
| 1388395_at   | AI406939  | G0/G1 switch gene 2                                                         | G0s2              | 6.744 | 0.008 | 5.911 | 0.013 | 1.976 | 0.375 | 2.705 | 0.039 |
| 1371585_at   | BE108192  | G1 to S phase transition 1                                                  | Gspt1             | 1.198 | 0.025 | 1.185 | 0.444 | 1.006 | 0.407 | 1.224 | 0.239 |
| 1394732_at   | BF289237  | G1 to S phase transition 1                                                  | Gspt1             | 1.342 | 0.618 | 1.323 | 0.174 | 1.112 | 0.349 | 1.116 | 0.120 |
| 1376890_at   | BE117326  | G4 protein                                                                  | G4                | 1.004 | 0.873 | 0.969 | 0.566 | 0.913 | 0.936 | 1.000 | 0.423 |
| 1380170_at   | BI303388  | GABA(A) receptor-associated protein like 2                                  | Gabarap12         | 1.563 | 0.250 | 0.470 | 0.006 | 1.114 | 0.360 | 0.365 | 0.016 |
| 1367783_at   | NM_022706 | GABA(A) receptor-associated protein like 2                                  | Gabarap12         | 1.055 | 0.333 | 0.979 | 0.248 | 1.176 | 0.014 | 1.015 | 0.567 |
| 1368074_at   | NM_080783 | galactose-4-epimerase, UDP                                                  | Gale              | 0.994 | 0.997 | 0.999 | 0.694 | 0.998 | 0.988 | 1.002 | 0.261 |
| 1382063_at   | BM385090  | galactosidase, alpha (mapped)                                               | Gla_mapped        | 0.689 | 0.269 | 0.795 | 0.080 | 0.909 | 0.099 | 0.791 | 0.151 |
| 1376781_at   | BI286116  | Galactosidase, beta 1 (mapped)                                              | Glb1_mapped       | 0.463 | 0.037 | 0.679 | 0.034 | 0.651 | 0.305 | 0.947 | 0.208 |
| 1387088_at   | NM_033237 | galanin                                                                     | Gal               | 1.124 | 0.284 | 1.010 | 0.997 | 1.390 | 0.126 | 0.889 | 0.997 |
| 1387702_at   | U30290    | galanin receptor 1                                                          | Galr1             | 0.414 | 0.000 | 0.769 | 0.042 | 0.417 | 0.001 | 0.475 | 0.041 |
| 1378772_at   | BF403919  | Gamma-aminobutyric acid (GABA) A receptor, subunit gamma 3                  | Gabrg3            | 1.000 | 0.989 | 0.998 | 0.977 | 1.002 | 0.947 | 1.001 | 0.966 |
| 1388039_a_at | AF283276  | gamma-aminobutyric acid (GABA) B receptor 1                                 | Gabbr1            | 0.816 | 0.508 | 0.517 | 0.065 | 1.040 | 0.806 | 0.554 | 0.011 |
| 1375720_at   | AI171785  | Gamma-aminobutyric acid (GABA) B receptor 1                                 | Gabbr1            | 0.776 | 0.997 | 0.566 | 0.004 | 0.734 | 0.209 | 0.646 | 0.006 |
| 1387383_at   | NM_031802 | gamma-aminobutyric acid (GABA) B receptor 2                                 | Gabbr2            | 0.335 | 0.028 | 0.303 | 0.002 | 0.500 | 0.018 | 0.414 | 0.031 |
| 1369904_at   | NM_012956 | gamma-aminobutyric acid (GABA-A) receptor, subunit beta 1                   | Gabrb1            | 0.851 | 0.528 | 0.520 | 0.004 | 0.870 | 0.656 | 0.518 | 0.010 |
| 1380828_at   | AI145413  | gamma-aminobutyric acid A receptor, alpha 1                                 | Gabra1            | 0.961 | 0.325 | 1.052 | 0.853 | 0.646 | 0.777 | 1.047 | 0.601 |
| 1370804_at   | AF161588  | gamma-aminobutyric acid receptor associated protein                         | Gabarap           | 0.660 | 0.522 | 1.094 | 0.521 | 0.543 | 0.111 | 0.962 | 0.288 |
| 1368314_at   | NM_031756 | gamma-glutamyl carboxylase                                                  | Ggcx              | 0.637 | 0.080 | 0.459 | 0.006 | 0.631 | 0.040 | 0.524 | 0.007 |
| 1368470_at   | NM_012960 | gamma-glutamyl hydrolase                                                    | Ggh               | 0.663 | 0.411 | 0.403 | 0.001 | 0.637 | 0.018 | 0.388 | 0.001 |
| 1368307_at   | NM_130423 | gamma-glutamyltransferase-like 3                                            | Ggtl3             | 0.687 | 0.191 | 0.460 | 0.021 | 0.798 | 0.711 | 0.551 | 0.005 |
| 1382498_x_at | BF408710  | ganglioside-induced differentiation-associated protein 1-like 1 (predicted) | Gdap1l1_predicted | 2.317 | 0.041 | 1.042 | 0.484 | 1.344 | 0.515 | 0.956 | 0.471 |
| 1379377_at   | BG371655  | ganglioside-induced differentiation-associated-protein 2                    | Gdap2             | 1.794 | 0.051 | 1.614 | 0.022 | 1.941 | 0.013 | 1.252 | 0.021 |
| 1372002_at   | AI411352  | gap junction membrane channel protein alpha 1                               | Gjal              | 0.934 | 0.700 | 0.866 | 0.335 | 0.568 | 0.615 | 1.157 | 0.986 |
| 1368473_at   | NM_019280 | gap junction membrane channel protein alpha 5                               | Gja5              | 0.850 | 0.320 | 1.142 | 0.868 | 0.985 | 0.578 | 0.986 | 0.973 |
| 1369796_at   | NM_019281 | gap junction membrane channel protein alpha 9                               | Gja9              | 1.583 | 0.360 | 0.498 | 0.080 | 1.188 | 0.583 | 0.553 | 0.060 |
| 1373386_at   | AI179953  | gap junction membrane channel protein beta 2                                | Gjb2              | 5.658 | 0.041 | 3.228 | 0.073 | 4.585 | 0.051 | 2.273 | 0.186 |
| 1368481_at   | NM_012714 | gastric inhibitory polypeptide receptor                                     | Gipr              | 0.554 | 0.005 | 0.138 | 0.001 | 0.637 | 0.046 | 0.124 | 0.015 |
| 1382163_at   | BE118901  | GATA binding protein 3                                                      | Gata3             | 1.004 | 0.985 | 1.082 | 0.735 | 1.207 | 0.334 | 1.069 | 0.689 |
| 1375613_at   | AW525075  | GATA binding protein 6                                                      | Gata6             | 1.179 | 0.529 | 1.003 | 0.985 | 1.077 | 0.028 | 1.001 | 0.903 |
| 1372073_at   | AI008814  | GATA zinc finger domain containing 2A                                       | Gatad2a           | 1.185 | 0.010 | 2.108 | 0.010 | 0.900 | 0.395 | 1.506 | 0.048 |
| 1392552_at   | BE109744  | GATA zinc finger domain containing 2B                                       | Gatad2b           | 1.862 | 0.045 | 2.478 | 0.003 | 0.848 | 0.009 | 1.621 | 0.028 |
| 1374945_at   | BI281827  | GCD14/PCMT domain containing protein RGD1359191                             | RGD1359191        | 0.463 | 0.003 | 1.391 | 0.086 | 0.423 | 0.000 | 2.402 | 0.058 |
| 1375288_at   | BI299737  | GCN1 general control of amino-acid synthesis 1-like 1 (yeast) (predicted)   | Gcn1l1_predicted  | 0.996 | 0.945 | 0.718 | 0.152 | 0.994 | 0.963 | 0.720 | 0.153 |
| 1367460_at   | BM387347  | GDP dissociation inhibitor 2                                                | Gdi2              | 0.822 | 0.159 | 0.952 | 0.014 | 0.814 | 0.001 | 0.974 | 0.120 |
| 1398822_at   | NM_017276 | GDP dissociation inhibitor 2                                                | Gdi2              | 0.497 | 0.880 | 0.627 | 0.144 | 0.426 | 0.597 | 0.523 | 0.007 |
| 1393713_at   | BM389780  | GDP-mannose 4, 6-dehydratase                                                | Gmds              | 0.673 | 0.716 | 0.730 | 0.381 | 0.560 | 0.135 | 0.723 | 0.057 |
| 1372859_at   | AI598958  | GDP-mannose pyrophosphorylase A                                             | Gmppa             | 0.878 | 0.429 | 0.581 | 0.020 | 1.054 | 0.547 | 0.586 | 0.006 |
| 1392701_at   | BI285572  | GDP-mannose pyrophosphorylase B (predicted)                                 | Gmppb_predicted   | 0.503 | 0.030 | 1.420 | 0.030 | 0.552 | 0.045 | 0.998 | 0.987 |
| 1371414_at   | BI285576  | gelsolin                                                                    | Gsn               | 1.042 | 0.941 | 0.919 | 0.895 | 1.041 | 0.970 | 0.978 | 0.709 |
| 1382216_at   | BF283004  | gem (nuclear organelle) associated protein 6                                | Gemin6            | 0.801 | 0.027 | 2.332 | 0.023 | 0.750 | 0.022 | 1.053 | 0.170 |
| 1392700_at   | AA900604  | Geminin (predicted)                                                         | Gmnn_predicted    | 0.665 | 0.090 | 1.319 | 0.116 | 0.797 | 0.004 | 0.996 | 0.987 |
| 1384070_at   | BF544982  | Gem-interacting protein (predicted)                                         | Gmip_predicted    | 0.728 | 0.718 | 0.852 | 0.061 | 0.775 | 0.839 | 0.918 | 0.106 |

|              |           |                                                                                                           |                     |       |       |       |       |       |       |       |       |
|--------------|-----------|-----------------------------------------------------------------------------------------------------------|---------------------|-------|-------|-------|-------|-------|-------|-------|-------|
| 1388032_a_at | D87927    | gene model 1960, (NCBI)                                                                                   | Gm1960              | 3.312 | 0.005 | 2.958 | 0.008 | 1.034 | 0.999 | 0.999 | 0.823 |
| 1370633_at   | D87927    | gene model 1960, (NCBI)                                                                                   | Gm1960              | 7.260 | 0.049 | 4.231 | 0.006 | 1.105 | 0.998 | 1.027 | 0.947 |
| 1371524_at   | AI009608  | gene trap locus 3                                                                                         | Gtl3                | 0.623 | 0.720 | 0.807 | 0.090 | 0.609 | 0.027 | 1.000 | 0.241 |
| 1369548_at   | NM_022208 | general transcription factor 2a, 1                                                                        | Gtf2a1              | 0.791 | 0.311 | 0.742 | 0.554 | 0.778 | 0.271 | 0.603 | 0.341 |
| 1399114_at   | AA996974  | general transcription factor II E, polypeptide 2 (beta subunit) (predicted)                               | Gtf2e2_predicted    | 0.849 | 0.583 | 1.437 | 0.076 | 1.114 | 0.167 | 1.116 | 0.092 |
| 1373094_at   | AW917124  | general transcription factor II H, polypeptide 1 (predicted)                                              | Gtf2h1_predicted    | 1.112 | 0.812 | 2.875 | 0.001 | 0.829 | 0.246 | 1.694 | 0.001 |
| 1382030_at   | BF398500  | general transcription factor II H, polypeptide 2 (predicted)                                              | Gtf2h2_predicted    | 1.047 | 0.740 | 0.819 | 0.508 | 1.331 | 0.141 | 0.725 | 0.070 |
| 1385803_at   | BM388555  | general transcription factor II H, polypeptide 2 (predicted)                                              | Gtf2h2_predicted    | 1.001 | 0.763 | 1.151 | 0.353 | 1.003 | 0.965 | 0.967 | 0.854 |
| 1395837_at   | BE119517  | General transcription factor II H, polypeptide 2 (predicted)                                              | Gtf2h2_predicted    | 0.998 | 0.998 | 1.173 | 0.913 | 1.175 | 0.243 | 0.942 | 0.348 |
| 1385517_at   | AI715835  | general transcription factor II I                                                                         | Gtf2i               | 0.914 | 0.040 | 0.688 | 0.010 | 0.903 | 0.288 | 0.689 | 0.044 |
| 1371931_at   | BI274753  | general transcription factor II I                                                                         | Gtf2i               | 0.390 | 0.085 | 0.333 | 0.000 | 0.391 | 0.040 | 0.461 | 0.022 |
| 1379550_a_at | BF290483  | general transcription factor II I repeat domain-containing 1                                              | Gtf2ird1            | 1.380 | 0.082 | 1.692 | 0.013 | 1.208 | 0.375 | 1.404 | 0.000 |
| 1387775_at   | NM_053345 | general transcription factor IIa 2                                                                        | Gtf2a2              | 0.837 | 0.315 | 0.993 | 0.941 | 0.863 | 0.096 | 0.992 | 0.427 |
| 1368220_at   | NM_031041 | general transcription factor IIB                                                                          | Gtf2b               | 0.562 | 0.552 | 0.413 | 0.021 | 0.794 | 0.189 | 0.509 | 0.013 |
| 1393106_x_at | BF420770  | general transcription factor IIF, polypeptide 1                                                           | Gtf2f1              | 0.522 | 0.037 | 0.678 | 0.004 | 0.321 | 0.007 | 0.376 | 0.057 |
| 1383627_a_at | BF420770  | general transcription factor IIF, polypeptide 1                                                           | Gtf2f1              | 0.659 | 0.132 | 0.813 | 0.058 | 0.373 | 0.074 | 0.600 | 0.011 |
| 1368233_at   | NM_031042 | general transcription factor IIF, polypeptide 2                                                           | Gtf2f2              | 0.566 | 0.230 | 1.395 | 0.229 | 0.681 | 0.277 | 1.465 | 0.119 |
| 1372415_at   | BM385649  | general transcription factor IIH, polypeptide 3                                                           | Gtf2h3              | 0.652 | 0.010 | 0.455 | 0.010 | 0.830 | 0.392 | 0.498 | 0.004 |
| 1371035_at   | BE098763  | general transcription factor III A                                                                        | Gtf3a               | 0.872 | 0.045 | 1.815 | 0.006 | 0.712 | 0.092 | 1.190 | 0.073 |
| 1370231_at   | AI234022  | general transcription factor III C 1                                                                      | Gtf3c1              | 0.556 | 0.287 | 0.516 | 0.013 | 0.636 | 0.093 | 0.289 | 0.050 |
| 1395486_at   | BF413851  | general transcription factor III C 1                                                                      | Gtf3c1              | 1.106 | 0.862 | 3.768 | 0.000 | 0.908 | 0.184 | 1.379 | 0.030 |
| 1389574_at   | AI014004  | general transcription factor IIIC, polypeptide 2, beta 110kDa                                             | Gtf3c2              | 0.837 | 0.296 | 0.796 | 0.300 | 0.814 | 0.456 | 0.880 | 0.138 |
| 1368117_at   | NM_022865 | gephyrin                                                                                                  | Gphn                | 1.428 | 0.143 | 0.956 | 0.317 | 1.301 | 0.141 | 1.063 | 0.553 |
| 1379556_a_at | AI105210  | geranylgeranyl diphosphate synthase 1                                                                     | Ggps1               | 1.536 | 0.001 | 1.097 | 0.099 | 0.968 | 0.551 | 1.120 | 0.056 |
| 1386215_at   | AI101566  | geranylgeranyl diphosphate synthase 1                                                                     | Ggps1               | 0.952 | 0.629 | 0.447 | 0.009 | 1.715 | 0.002 | 1.104 | 0.428 |
| 1375960_at   | BF281879  | germ cell-less homolog 1 (Drosophila)                                                                     | Gmcl1               | 0.462 | 0.003 | 0.452 | 0.014 | 0.562 | 0.008 | 0.617 | 0.050 |
| 1372726_at   | AI176792  | germinal histone H4 gene                                                                                  | Hist1h4b            | 0.849 | 0.302 | 0.911 | 0.078 | 0.847 | 0.061 | 1.028 | 0.455 |
| 1374600_at   | BM986536  | germinal histone H4 gene                                                                                  | Hist1h4b            | 1.185 | 0.399 | 1.008 | 0.982 | 1.091 | 0.449 | 1.002 | 0.888 |
| 1379654_at   | AA946433  | GIY-YIG domain containing 2                                                                               | Giyd2               | 0.931 | 0.988 | 1.188 | 0.739 | 1.020 | 0.991 | 1.089 | 0.046 |
| 1393357_at   | AW253109  | GLE1 RNA export mediator-like (yeast)                                                                     | Gle1l               | 1.315 | 0.109 | 1.251 | 0.009 | 2.074 | 0.059 | 1.570 | 0.005 |
| 1373504_at   | BF287967  | GLI pathogenesis-related 1 (glioma)                                                                       | Glipr1              | 0.996 | 0.913 | 0.982 | 0.750 | 0.986 | 0.380 | 1.004 | 0.984 |
| 1387663_at   | NM_031032 | glia maturation factor, beta                                                                              | Gmfb                | 2.211 | 0.108 | 9.924 | 0.001 | 1.409 | 0.513 | 9.605 | 0.001 |
| 1373490_at   | BG666787  | glia maturation factor, gamma                                                                             | Gmfg                | 1.628 | 0.158 | 2.172 | 0.081 | 0.725 | 0.251 | 1.907 | 0.122 |
| 1382077_at   | BF388974  | GLI-Kruppel family member GLI3                                                                            | Gli3                | 1.443 | 0.760 | 0.900 | 0.259 | 0.855 | 0.762 | 0.729 | 0.128 |
| 1374234_at   | AI073183  | GLI-Kruppel family member HKR3                                                                            | Hkr3                | 0.940 | 0.762 | 0.999 | 0.199 | 0.943 | 0.891 | 1.000 | 0.503 |
| 1371471_at   | BF281741  | glioma tumor suppressor candidate region gene 2                                                           | Gltscr2             | 0.827 | 0.491 | 1.425 | 0.010 | 1.028 | 0.116 | 1.183 | 0.303 |
| 1369888_at   | NM_012707 | glucagon                                                                                                  | Gcg                 | 0.711 | 0.086 | 0.095 | 0.000 | 0.767 | 0.011 | 0.165 | 0.005 |
| 1370522_at   | L04796    | glucagon receptor                                                                                         | Gcgr                | 2.690 | 0.016 | 2.105 | 0.081 | 2.060 | 0.046 | 0.887 | 0.244 |
| 1369699_at   | NM_012728 | glucagon-like peptide 1 receptor                                                                          | Glp1r               | 0.472 | 0.131 | 0.315 | 0.007 | 0.964 | 0.186 | 0.392 | 0.019 |
| 1389265_at   | BI284270  | glucan (1,4-alpha-), branching enzyme 1                                                                   | Gbe1                | 0.584 | 0.255 | 1.749 | 0.034 | 0.907 | 0.669 | 1.666 | 0.004 |
| 1388067_a_at | AF205779  | glucocorticoid modulatory element binding protein 2                                                       | Gmeb2               | 1.404 | 0.025 | 2.606 | 0.004 | 1.700 | 0.002 | 1.896 | 0.000 |
| 1387312_a_at | NM_012565 | glucokinase                                                                                               | Gck                 | 0.196 | 0.001 | 0.222 | 0.007 | 0.322 | 0.082 | 0.236 | 0.017 |
| 1371894_at   | AI409037  | glucosamine (N-acetyl)-6-sulfatase                                                                        | Gns                 | 1.105 | 0.022 | 1.389 | 0.001 | 1.314 | 0.028 | 1.690 | 0.006 |
| 1394614_at   | BI290687  | glucosamine (N-acetyl)-6-sulfatase                                                                        | Gns                 | 1.959 | 0.065 | 2.658 | 0.156 | 0.646 | 0.062 | 1.775 | 0.320 |
| 1395265_at   | BF419323  | glucosamine (N-acetyl)-6-sulfatase                                                                        | Gns                 | 1.201 | 0.608 | 1.122 | 0.259 | 1.015 | 0.487 | 1.497 | 0.020 |
| 1373669_at   | BG374650  | glucosamine-6-phosphate deaminase 2 (predicted)                                                           | Gnpda2_predicted    | 3.529 | 0.000 | 1.890 | 0.001 | 4.136 | 0.000 | 2.406 | 0.002 |
| 1368770_at   | NM_022276 | glucosaminyl (N-acetyl) transferase 1, core 2                                                             | Gcnt1               | 1.298 | 0.852 | 1.274 | 0.576 | 1.196 | 0.690 | 0.820 | 0.379 |
| 1374903_at   | AI234819  | glucosaminyl (N-acetyl) transferase 2, I-branching enzyme /// hypothetical gene supported by NM_001001511 | Gcnt2 /// LOC497712 | 6.625 | 0.002 | 0.562 | 0.005 | 5.039 | 0.007 | 0.606 | 0.022 |
| 1371561_at   | AA849522  | glucose 6 phosphatase, catalytic, 3                                                                       | G6pc3               | 1.087 | 0.601 | 1.278 | 0.051 | 1.156 | 0.034 | 1.235 | 0.015 |
| 1371392_at   | BI283882  | glucose phosphate isomerase                                                                               | Gpi                 | 0.427 | 0.211 | 1.045 | 0.035 | 0.515 | 0.003 | 1.037 | 0.832 |
| 1367856_at   | NM_017006 | glucose-6-phosphate dehydrogenase X-linked                                                                | G6pdx               | 0.638 | 0.010 | 1.322 | 0.143 | 0.699 | 0.016 | 1.102 | 0.031 |
| 1367991_at   | NM_031749 | glucosidase 1                                                                                             | Gcs1                | 0.561 | 0.097 | 0.783 | 0.045 | 0.316 | 0.006 | 0.895 | 0.088 |
| 1399040_at   | AI178644  | glucosidase beta 2                                                                                        | Gba2                | 0.668 | 0.912 | 0.404 | 0.330 | 0.904 | 0.604 | 0.194 | 0.037 |
| 1371799_at   | AI175438  | glucosidase, alpha, acid                                                                                  | Gaa                 | 0.757 | 0.476 | 0.728 | 0.052 | 0.549 | 0.021 | 0.737 | 0.066 |
| 1378239_at   | BF404337  | glucosidase, alpha, acid                                                                                  | Gaa                 | 0.999 | 0.966 | 0.821 | 0.949 | 0.728 | 0.087 | 0.845 | 0.384 |
| 1367901_at   | NM_017015 | glucuronidase, beta                                                                                       | Gusb                | 0.370 | 0.002 | 0.257 | 0.004 | 0.574 | 0.035 | 0.488 | 0.014 |
| 1380590_at   | BE115496  | Glucuronidase, beta                                                                                       | Gusb                | 1.341 | 0.030 | 2.173 | 0.009 | 1.336 | 0.050 | 1.581 | 0.051 |
| 1373139_at   | AI012608  | Glucuronidase, beta                                                                                       | Gusb                | 0.682 | 0.273 | 0.833 | 0.089 | 0.710 | 0.031 | 0.699 | 0.132 |
| 1370030_at   | NM_017305 | glutamate cysteine ligase, modifier subunit                                                               | Gclm                | 0.795 | 0.947 | 2.298 | 0.006 | 0.825 | 0.345 | 2.215 | 0.005 |
| 1370200_at   | BI284411  | glutamate dehydrogenase 1                                                                                 | Glud1               | 0.318 | 0.033 | 0.256 | 0.000 | 0.238 | 0.001 | 0.313 | 0.007 |
| 1387878_at   | AW916644  | glutamate dehydrogenase 1                                                                                 | Glud1               | 0.380 | 0.058 | 0.451 | 0.000 | 0.264 | 0.005 | 0.427 | 0.001 |



|              |           |                                                                                               |                      |       |       |        |       |       |       |        |       |
|--------------|-----------|-----------------------------------------------------------------------------------------------|----------------------|-------|-------|--------|-------|-------|-------|--------|-------|
| 1368272_at   | D00252    | glutamate oxaloacetate transaminase 1                                                         | Got1                 | 0.523 | 0.153 | 0.912  | 0.521 | 0.818 | 0.180 | 1.091  | 0.638 |
| 1389871_at   | BI296539  | glutamate oxaloacetate transaminase 2, mitochondrial                                          | Got2                 | 1.011 | 0.532 | 1.077  | 0.791 | 1.698 | 0.111 | 1.071  | 0.874 |
| 1367819_at   | NM_013177 | glutamate oxaloacetate transaminase 2, mitochondrial                                          | Got2                 | 0.833 | 0.973 | 1.138  | 0.145 | 0.771 | 0.272 | 1.318  | 0.089 |
| 1380327_at   | AI408747  | Glutamate receptor interacting protein 1                                                      | Grip1                | 1.146 | 0.085 | 0.586  | 0.370 | 1.981 | 0.002 | 0.785  | 0.118 |
| 1369343_at   | NM_032069 | glutamate receptor interacting protein 1                                                      | Grip1                | 1.018 | 0.942 | 0.818  | 0.049 | 0.996 | 0.932 | 0.825  | 0.060 |
| 1377546_at   | BF397279  | Glutamate receptor, ionotropic, 4                                                             | Gria4                | 1.460 | 0.583 | 1.913  | 0.863 | 0.962 | 0.108 | 1.314  | 0.422 |
| 1387171_at   | NM_017261 | glutamate receptor, ionotropic, AMPA2                                                         | Gria2                | 0.368 | 0.007 | 0.060  | 0.007 | 0.343 | 0.012 | 0.146  | 0.028 |
| 1394578_at   | BI299761  | Glutamate receptor, ionotropic, AMPA2                                                         | Gria2                | 0.459 | 0.064 | 0.272  | 0.005 | 0.660 | 0.284 | 0.439  | 0.006 |
| 1368401_at   | M85035    | glutamate receptor, ionotropic, AMPA2                                                         | Gria2                | 0.477 | 0.065 | 0.201  | 0.001 | 0.551 | 0.001 | 0.385  | 0.019 |
| 1393995_at   | AW534561  | Glutamate receptor, ionotropic, AMPA2                                                         | Gria2                | 0.932 | 0.406 | 0.298  | 0.031 | 0.632 | 0.067 | 0.524  | 0.020 |
| 1392248_at   | AI145008  | Glutamate receptor, ionotropic, delta 1                                                       | Grid1                | 0.518 | 0.024 | 0.971  | 0.788 | 1.358 | 0.361 | 0.987  | 1.000 |
| 1375783_at   | BF404569  | Glutamate receptor, ionotropic, kainate 5                                                     | Grik5                | 1.034 | 0.737 | 1.038  | 0.872 | 1.381 | 0.246 | 1.033  | 0.894 |
| 1368306_at   | U08259    | glutamate receptor, ionotropic, NMDA2C                                                        | Grin2c               | 0.816 | 0.245 | 1.249  | 0.211 | 0.591 | 0.174 | 0.801  | 0.314 |
| 1372724_at   | BI284904  | glutamate receptor, ionotropic, N-methyl D-aspartate-associated protein 1 (glutamate binding) | Grina                | 2.152 | 0.229 | 2.205  | 0.005 | 2.398 | 0.003 | 2.773  | 0.001 |
| 1374267_at   | BG378154  | Glutamate receptor, ionotropic, N-methyl D-aspartate-associated protein 1 (glutamate binding) | Grina                | 1.283 | 0.518 | 1.037  | 0.917 | 1.297 | 0.712 | 0.996  | 0.931 |
| 1398889_at   | BE113383  | glutamate receptor, ionotropic, N-methyl D-aspartate-like 1A                                  | Grin1a               | 0.720 | 0.111 | 1.212  | 0.028 | 0.695 | 0.022 | 1.183  | 0.042 |
| 1371051_at   | BG664035  | glutamate receptor, ionotropic, N-methyl D-aspartate-like 1A                                  | Grin1a               | 0.899 | 0.705 | 1.326  | 0.180 | 0.518 | 0.932 | 1.083  | 0.923 |
| 1387286_at   | NM_017011 | glutamate receptor, metabotropic 1                                                            | Grm1                 | 1.106 | 0.909 | 1.001  | 0.841 | 0.996 | 0.949 | 1.114  | 0.205 |
| 1367633_at   | BI296610  | glutamate-ammonia ligase (glutamine synthase)                                                 | Glul                 | 2.445 | 0.008 | 1.299  | 0.589 | 0.798 | 0.845 | 0.852  | 0.255 |
| 1367632_at   | NM_017073 | glutamate-ammonia ligase (glutamine synthase)                                                 | Glul                 | 1.247 | 0.102 | 0.464  | 0.003 | 1.202 | 0.139 | 0.509  | 0.002 |
| 1386870_at   | BI275294  | glutamate-ammonia ligase (glutamine synthase)                                                 | Glul                 | 1.706 | 0.125 | 1.601  | 0.088 | 1.198 | 0.815 | 0.805  | 0.289 |
| 1375569_at   | BM386267  | glutamate-ammonia ligase (glutamine synthase)                                                 | Glul                 | 0.907 | 0.193 | 0.949  | 0.588 | 1.091 | 0.737 | 0.975  | 0.276 |
| 1389426_at   | AW528806  | glutamate-ammonia ligase (glutamine synthase)                                                 | Glul                 | 0.812 | 0.927 | 0.744  | 0.040 | 0.695 | 0.236 | 0.716  | 0.078 |
| 1372523_at   | AA892770  | glutamate-cysteine ligase, catalytic subunit                                                  | Gclc                 | 0.974 | 0.938 | 3.399  | 0.001 | 0.840 | 0.398 | 2.332  | 0.003 |
| 1374569_at   | BF419158  | glutamate-rich WD repeat containing 1                                                         | Grwd1                | 0.858 | 0.558 | 3.995  | 0.051 | 0.859 | 0.256 | 2.400  | 0.138 |
| 1368344_at   | NM_017007 | glutamic acid decarboxylase 1                                                                 | Gad1                 | 0.466 | 0.002 | 0.610  | 0.003 | 0.678 | 0.016 | 0.671  | 0.075 |
| 1370760_a_at | M38350    | glutamic acid decarboxylase 1                                                                 | Gad1                 | 0.471 | 0.170 | 1.667  | 0.803 | 0.456 | 0.157 | 1.295  | 0.423 |
| 1369462_at   | NM_012563 | glutamic acid decarboxylase 2                                                                 | Gad2                 | 0.489 | 0.339 | 0.122  | 0.016 | 0.435 | 0.022 | 0.190  | 0.010 |
| 1382232_at   | AI454322  | Glutamic pyruvate transaminase (alanine aminotransferase) 2 (predicted)                       | Gpt2_predicted       | 0.792 | 0.378 | 0.715  | 0.102 | 0.419 | 0.044 | 0.544  | 0.015 |
| 1384903_at   | AI535168  | glutamic pyruvate transaminase (alanine aminotransferase) 2 (predicted)                       | Gpt2_predicted       | 1.005 | 0.994 | 1.021  | 0.977 | 1.012 | 0.636 | 0.997  | 0.827 |
| 1382521_at   | AA925755  | glutaminase                                                                                   | Gls                  | 1.289 | 0.139 | 0.706  | 0.047 | 1.840 | 0.111 | 0.743  | 0.029 |
| 1367805_at   | NM_012569 | glutaminase                                                                                   | Gls                  | 0.756 | 0.362 | 0.373  | 0.003 | 0.998 | 0.991 | 0.293  | 0.001 |
| 1370375_at   | J05499    | glutaminase 2 (liver, mitochondrial)                                                          | Gls2                 | 0.281 | 0.099 | 0.336  | 0.012 | 0.282 | 0.101 | 0.357  | 0.011 |
| 1393735_at   | AI712582  | Glutamine and serine rich 1 (predicted)                                                       | Qser1_predicted      | 1.721 | 0.017 | 1.178  | 0.299 | 2.934 | 0.008 | 2.251  | 0.059 |
| 1380179_at   | AI548649  | Glutamine and serine rich 1 (predicted)                                                       | Qser1_predicted      | 1.199 | 0.493 | 2.012  | 0.091 | 0.774 | 0.071 | 1.007  | 0.916 |
| 1389254_at   | AA800519  | Glutamine and serine rich 1 (predicted)                                                       | Qser1_predicted      | 0.956 | 0.710 | 0.520  | 0.005 | 0.936 | 0.525 | 0.668  | 0.008 |
| 1396831_at   | AI501417  | Glutamine repeat protein 1 (predicted)                                                        | Glrp1_predicted      | 1.040 | 0.408 | 0.822  | 0.486 | 0.793 | 0.162 | 1.025  | 0.939 |
| 1377761_at   | BI296057  | glutamine-fructose-6-phosphate transaminase 2                                                 | Gfpt2                | 6.511 | 0.001 | 1.422  | 0.113 | 6.027 | 0.002 | 1.505  | 0.002 |
| 1383831_at   | BI280298  | glutaminyl-tRNA synthase (glutamine-hydrolyzing)-like 1                                       | Qrs1l                | 0.994 | 0.982 | 1.016  | 0.907 | 0.998 | 0.967 | 1.001  | 0.738 |
|              |           |                                                                                               | Qars ///             |       |       |        |       |       |       |        |       |
| 1371930_at   | BG380882  | glutaminyl-tRNA synthetase /// similar to glutaminyl-tRNA synthetase (predicted)              | RGD1562301_predicted | 1.053 | 0.314 | 0.899  | 0.068 | 1.205 | 0.072 | 1.198  | 0.106 |
| 1368513_at   | AW144216  | glutamyl aminopeptidase                                                                       | Enpep                | 0.980 | 0.779 | 0.941  | 0.811 | 0.654 | 0.032 | 0.831  | 0.401 |
| 1373418_at   | BM388143  | glutamyl-prolyl-tRNA synthetase                                                               | Eprs                 | 0.802 | 0.009 | 1.501  | 0.002 | 0.705 | 0.005 | 1.254  | 0.044 |
| 1383455_at   | BF553211  | glutamyl-prolyl-tRNA synthetase                                                               | Eprs                 | 0.677 | 0.010 | 1.222  | 0.064 | 0.706 | 0.072 | 1.183  | 0.683 |
| 1382040_at   | AI234919  | glutamyl-prolyl-tRNA synthetase                                                               | Eprs                 | 0.586 | 0.398 | 0.814  | 0.653 | 0.748 | 0.451 | 0.709  | 0.088 |
| 1367705_at   | AF319950  | glutaredoxin 1 (thioltransferase)                                                             | Glr1                 | 0.233 | 0.008 | 0.064  | 0.002 | 0.477 | 0.355 | 0.095  | 0.019 |
| 1386908_at   | NM_022278 | glutaredoxin 1 (thioltransferase)                                                             | Glr1                 | 0.348 | 0.026 | 0.088  | 0.000 | 0.680 | 0.102 | 0.220  | 0.012 |
| 1374340_at   | AA848536  | Glutaredoxin 2 (thioltransferase)                                                             | Glr2                 | 0.652 | 0.098 | 0.750  | 0.011 | 0.705 | 0.018 | 0.715  | 0.013 |
| 1386594_at   | BF558518  | Glutaredoxin 2 (thioltransferase)                                                             | Glr2                 | 1.580 | 0.125 | 1.067  | 0.746 | 1.153 | 0.344 | 0.950  | 0.571 |
| 1383062_at   | BE105102  | Glutaredoxin 2 (thioltransferase)                                                             | Glr2                 | 1.200 | 0.434 | 0.655  | 0.006 | 1.226 | 0.175 | 0.787  | 0.083 |
| 1373675_at   | AW525635  | glutaredoxin 2 (thioltransferase)                                                             | Glr2                 | 0.736 | 0.449 | 1.153  | 0.079 | 0.698 | 0.253 | 1.021  | 0.315 |
| 1393159_at   | BG671304  | Glutaredoxin 2 (thioltransferase)                                                             | Glr2                 | 0.901 | 0.676 | 1.598  | 0.012 | 1.580 | 0.881 | 1.203  | 0.927 |
| 1389286_at   | AI232948  | glutaredoxin 5 homolog (S. cerevisiae) (predicted)                                            | Glr5_predicted       | 1.098 | 0.648 | 0.846  | 0.539 | 0.751 | 0.112 | 0.782  | 0.064 |
| 1388788_at   | BG664131  | glutaryl-Coenzyme A dehydrogenase (predicted)                                                 | Gcdh_predicted       | 0.788 | 0.053 | 0.792  | 0.082 | 0.639 | 0.035 | 0.674  | 0.041 |
| 1384638_at   | AI030545  | Glutaryl-Coenzyme A dehydrogenase (predicted)                                                 | Gcdh_predicted       | 0.706 | 0.404 | 0.355  | 0.002 | 0.652 | 0.200 | 0.303  | 0.008 |
| 1367576_at   | S41066    | glutathione peroxidase 1                                                                      | Gpx1                 | 1.001 | 0.649 | 2.403  | 0.011 | 0.792 | 0.598 | 1.460  | 0.101 |
| 1374070_at   | AA800587  | glutathione peroxidase 2                                                                      | Gpx2                 | 3.566 | 0.076 | 14.737 | 0.000 | 2.248 | 0.065 | 10.684 | 0.001 |
| 1369926_at   | NM_022525 | glutathione peroxidase 3                                                                      | Gpx3                 | 0.690 | 0.542 | 0.163  | 0.019 | 0.695 | 0.569 | 0.125  | 0.059 |
| 1386871_at   | NM_017165 | glutathione peroxidase 4                                                                      | Gpx4                 | 0.718 | 0.595 | 1.644  | 0.102 | 0.558 | 0.001 | 1.056  | 0.310 |
| 1372125_at   | BF408445  | glutathione peroxidase 7 (predicted)                                                          | Gpx7_predicted       | 1.025 | 0.874 | 1.602  | 0.254 | 0.774 | 0.029 | 0.847  | 0.398 |
| 1381703_at   | AW525915  | Glutathione reductase                                                                         | Gsr                  | 1.453 | 0.003 | 3.386  | 0.019 | 1.095 | 0.810 | 3.079  | 0.006 |

|               |               |                                                                                                                                                                                                                                                                                                                          |                                                                                                                       |       |       |        |       |       |       |       |       |
|---------------|---------------|--------------------------------------------------------------------------------------------------------------------------------------------------------------------------------------------------------------------------------------------------------------------------------------------------------------------------|-----------------------------------------------------------------------------------------------------------------------|-------|-------|--------|-------|-------|-------|-------|-------|
| 1367774_at    | NM_031509     | glutathione S-transferase A3                                                                                                                                                                                                                                                                                             | Gsta3                                                                                                                 | 0.580 | 0.017 | 6.336  | 0.005 | 0.453 | 0.069 | 1.778 | 0.026 |
| 1398378_at    | AI231779      | glutathione S-transferase kappa 1                                                                                                                                                                                                                                                                                        | Gstk1                                                                                                                 | 0.818 | 0.890 | 1.096  | 0.106 | 0.733 | 0.842 | 0.816 | 0.043 |
| 1389832_at    | BE113459      | glutathione S-transferase omega 1                                                                                                                                                                                                                                                                                        | Gsto1                                                                                                                 | 0.618 | 0.224 | 1.535  | 0.008 | 0.658 | 0.027 | 1.593 | 0.008 |
| 1368354_at    | NM_053293     | glutathione S-transferase theta 1                                                                                                                                                                                                                                                                                        | Gstt1                                                                                                                 | 1.008 | 0.198 | 0.678  | 0.011 | 0.929 | 0.301 | 0.755 | 0.229 |
| 1372297_at    | AI234527      | glutathione S-transferase, alpha 4                                                                                                                                                                                                                                                                                       | Gsta4                                                                                                                 | 1.002 | 0.360 | 0.726  | 0.452 | 0.500 | 0.323 | 0.542 | 0.819 |
| 1370813_at    | U86635        | glutathione S-transferase, mu 5                                                                                                                                                                                                                                                                                          | Gstm5                                                                                                                 | 1.084 | 0.911 | 0.932  | 0.976 | 1.099 | 0.080 | 0.999 | 0.998 |
| 1387023_at    | NM_031154     | glutathione S-transferase, mu type 3                                                                                                                                                                                                                                                                                     | Gstm3                                                                                                                 | 0.375 | 0.002 | 0.136  | 0.001 | 0.384 | 0.003 | 0.120 | 0.005 |
| 1370365_at    | L38615        | glutathione synthetase                                                                                                                                                                                                                                                                                                   | Gss                                                                                                                   | 0.459 | 0.006 | 1.473  | 0.019 | 0.502 | 0.236 | 1.626 | 0.213 |
| 1388122_at    | X02904        | glutathione-S-transferase, pi 1 /// glutathione S-transferase, pi 2                                                                                                                                                                                                                                                      | Gstp1 /// Gstp2                                                                                                       | 0.829 | 0.586 | 4.614  | 0.009 | 0.519 | 0.044 | 6.305 | 0.015 |
| AFFX_Rat_GAP1 | AFFX_Rat_GAP1 | glyceraldehyde-3-phosphate dehydrogenase                                                                                                                                                                                                                                                                                 | Gapdh                                                                                                                 | 0.824 | 0.103 | 1.005  | 0.445 | 0.815 | 0.010 | 0.994 | 0.901 |
| AFFX_Rat_GAP1 | AFFX_Rat_GAP1 | glyceraldehyde-3-phosphate dehydrogenase                                                                                                                                                                                                                                                                                 | Gapdh                                                                                                                 | 0.728 | 0.260 | 0.967  | 0.444 | 0.674 | 0.069 | 0.873 | 0.102 |
| AFFX_Rat_GAP1 | AFFX_Rat_GAP1 | glyceraldehyde-3-phosphate dehydrogenase                                                                                                                                                                                                                                                                                 | Gapdh                                                                                                                 | 0.825 | 0.274 | 1.049  | 0.233 | 0.706 | 0.093 | 0.880 | 0.038 |
| 1367557_s_at  | NM_017008     | glyceraldehyde-3-phosphate dehydrogenase /// similar to glyceraldehyde-3-phosphate dehydrogenase (predicted) | Gapdh ///<br>RGD1564688_predicted ///<br>RGD1564351_predicted ///<br>RGD1561683_predicted ///<br>RGD1565368_predicted | 0.812 | 0.196 | 0.976  | 0.943 | 0.772 | 0.039 | 0.938 | 0.265 |
| 1369510_at    | NM_023964     | glyceraldehyde-3-phosphate dehydrogenase, spermatogenic                                                                                                                                                                                                                                                                  | Gapdhs                                                                                                                | 0.919 | 0.079 | 1.001  | 0.835 | 0.921 | 0.491 | 0.998 | 0.873 |
| 1369666_at    | BG378763      | Glycerol-3-phosphate dehydrate dehydrogenase (mtGPDH) mRNA, 3'UTR, mRNA sequence                                                                                                                                                                                                                                         | ---                                                                                                                   | 0.621 | 0.380 | 0.541  | 0.203 | 0.590 | 0.589 | 0.782 | 0.051 |
| 1387670_at    | U08027        | glycerol-3-phosphate dehydrogenase 2, mitochondrial                                                                                                                                                                                                                                                                      | Gpd2                                                                                                                  | 1.334 | 0.264 | 1.119  | 0.674 | 1.063 | 0.203 | 1.003 | 0.476 |
| 1368890_at    | NM_053410     | glyceronephosphate O-acyltransferase                                                                                                                                                                                                                                                                                     | Gnpat                                                                                                                 | 0.578 | 0.004 | 1.246  | 0.393 | 0.734 | 0.439 | 0.994 | 0.438 |
| 1368891_at    | AI014001      | Glyceronephosphate O-acyltransferase                                                                                                                                                                                                                                                                                     | Gnpat                                                                                                                 | 0.971 | 0.241 | 0.848  | 0.379 | 1.645 | 0.043 | 1.061 | 0.614 |
| 1378235_at    | AI549590      | glycerophosphodiester phosphodiesterase domain containing 1 (predicted)                                                                                                                                                                                                                                                  | Gdpd1_predicted                                                                                                       | 0.689 | 0.031 | 0.876  | 0.418 | 0.628 | 0.014 | 1.184 | 0.597 |
| 1382325_at    | AW525471      | glycine C-acetyltransferase (2-amino-3-ketobutyrate-coenzyme A ligase)                                                                                                                                                                                                                                                   | Gcat                                                                                                                  | 0.595 | 0.409 | 0.915  | 0.126 | 0.458 | 0.038 | 0.770 | 0.319 |
| 1367908_at    | NM_133598     | glycine cleavage system protein H (aminomethyl carrier)                                                                                                                                                                                                                                                                  | Gcsh                                                                                                                  | 0.429 | 0.079 | 1.107  | 0.059 | 0.340 | 0.006 | 0.817 | 0.056 |
| 1384128_at    | BF393261      | glycine-, glutamate-, thienylcyclohexylpiperidine-binding protein                                                                                                                                                                                                                                                        | LOC246295                                                                                                             | 0.472 | 0.009 | 0.828  | 0.116 | 0.694 | 0.099 | 0.681 | 0.255 |
| 1389714_at    | AI103146      | Glycogen synthase kinase 3 alpha                                                                                                                                                                                                                                                                                         | Gsk3a                                                                                                                 | 1.332 | 0.132 | 5.738  | 0.002 | 1.167 | 0.563 | 2.418 | 0.004 |
| 1386883_at    | NM_017344     | glycogen synthase kinase 3 alpha                                                                                                                                                                                                                                                                                         | Gsk3a                                                                                                                 | 1.001 | 0.262 | 1.071  | 0.682 | 0.999 | 0.286 | 1.002 | 0.998 |
| 1370267_at    | BF287444      | glycogen synthase kinase 3 beta                                                                                                                                                                                                                                                                                          | Gsk3b                                                                                                                 | 0.997 | 0.993 | 2.002  | 0.101 | 1.003 | 0.997 | 2.186 | 0.127 |
| 1367900_at    | NM_031043     | glycogenin 1                                                                                                                                                                                                                                                                                                             | Gyg1                                                                                                                  | 0.875 | 0.821 | 1.704  | 0.039 | 0.658 | 0.117 | 1.503 | 0.085 |
| 1388480_at    | AI412863      | glycolipid transfer protein (predicted)                                                                                                                                                                                                                                                                                  | Gltg_predicted                                                                                                        | 0.959 | 0.513 | 0.814  | 0.235 | 1.087 | 0.130 | 0.963 | 0.596 |
| 1368187_at    | NM_133298     | glycoprotein (transmembrane) nmb                                                                                                                                                                                                                                                                                         | Gpnmb                                                                                                                 | 1.123 | 0.344 | 12.599 | 0.000 | 0.790 | 0.557 | 7.309 | 0.004 |
| 1367852_s_at  | NM_053931     | glycoprotein Ib, beta polypeptide /// septin 5                                                                                                                                                                                                                                                                           | Gp1bb /// Sept5                                                                                                       | 1.000 | 0.995 | 0.999  | 0.992 | 0.612 | 0.998 | 0.997 | 0.983 |
| 1373773_at    | BF394166      | glycoprotein m6a                                                                                                                                                                                                                                                                                                         | Gpm6a                                                                                                                 | 0.608 | 0.067 | 0.408  | 0.629 | 0.781 | 0.160 | 0.727 | 0.910 |
| 1371358_at    | BI282960      | glycoprotein, synaptic 2                                                                                                                                                                                                                                                                                                 | Gpsn2                                                                                                                 | 0.517 | 0.123 | 0.330  | 0.000 | 0.464 | 0.012 | 0.320 | 0.008 |
| 1380833_at    | AI045802      | glycosylphosphatidylinositol specific phospholipase D1                                                                                                                                                                                                                                                                   | Gpld1                                                                                                                 | 0.225 | 0.048 | 0.414  | 0.011 | 0.799 | 0.067 | 0.515 | 0.016 |
| 1372050_at    | BI279577      | Glycosyltransferase 25 domain containing 1 (predicted)                                                                                                                                                                                                                                                                   | Glt25d1_predicted                                                                                                     | 0.723 | 0.238 | 1.187  | 0.544 | 0.704 | 0.083 | 1.196 | 0.728 |
| 1388893_at    | AI411616      | glycosyltransferase 8 domain containing 1                                                                                                                                                                                                                                                                                | Glt8d1                                                                                                                | 1.117 | 0.250 | 0.965  | 0.603 | 1.036 | 0.183 | 0.949 | 0.395 |
| 1395652_at    | BI296264      | glycosyltransferase-like 1B                                                                                                                                                                                                                                                                                              | Gylt1b                                                                                                                | 0.592 | 0.037 | 0.464  | 0.032 | 0.609 | 0.130 | 0.464 | 0.045 |
| 1376132_at    | BI289512      | glycosyltransferase-like protein                                                                                                                                                                                                                                                                                         | LOC362129                                                                                                             | 1.372 | 0.176 | 1.989  | 0.007 | 0.915 | 0.668 | 2.254 | 0.145 |
| 1388715_at    | AA818089      | glycyl-tRNA synthetase                                                                                                                                                                                                                                                                                                   | Gars                                                                                                                  | 0.449 | 0.004 | 0.760  | 0.014 | 0.426 | 0.001 | 0.783 | 0.047 |
| 1395730_at    | AW507352      | glycyl-tRNA synthetase /// similar to Glycyl-tRNA synthetase (predicted)                                                                                                                                                                                                                                                 | Gars ///<br>RGD1559871_predicted                                                                                      | 1.003 | 0.798 | 0.642  | 0.044 | 0.534 | 0.779 | 0.343 | 0.082 |
| 1399098_at    | AI103970      | glyoxylase 1                                                                                                                                                                                                                                                                                                             | Glo1                                                                                                                  | 0.633 | 0.135 | 0.690  | 0.089 | 0.700 | 0.009 | 0.565 | 0.120 |
| 1373337_at    | AI412065      | glyoxylate reductase/hydroxypyruvate reductase (predicted)                                                                                                                                                                                                                                                               | Grhpr_predicted                                                                                                       | 0.279 | 0.001 | 1.098  | 0.442 | 0.276 | 0.006 | 0.430 | 0.022 |
| 1387039_at    | NM_030828     | glypican 1                                                                                                                                                                                                                                                                                                               | Gpc1                                                                                                                  | 0.455 | 0.007 | 0.893  | 0.262 | 0.265 | 0.002 | 0.569 | 0.016 |
| 1392888_at    | AI071251      | glypican 4                                                                                                                                                                                                                                                                                                               | Gpc4                                                                                                                  | 1.212 | 0.091 | 0.934  | 0.071 | 1.397 | 0.046 | 0.991 | 0.818 |
| 1387906_a_at  | AF107845      | GNAS complex locus                                                                                                                                                                                                                                                                                                       | Gnas                                                                                                                  | 0.493 | 0.001 | 0.434  | 0.001 | 0.586 | 0.003 | 0.320 | 0.012 |
| 1369897_s_at  | BI277035      | GNAS complex locus /// XLas protein                                                                                                                                                                                                                                                                                      | Gnas /// Xlas                                                                                                         | 0.703 | 0.193 | 0.391  | 0.000 | 0.671 | 0.109 | 0.339 | 0.010 |
| 1387367_at    | NM_017211     | golgi apparatus protein 1                                                                                                                                                                                                                                                                                                | Glg1                                                                                                                  | 0.617 | 0.518 | 0.956  | 0.303 | 0.332 | 0.044 | 0.437 | 0.066 |
| 1374761_at    | BM387073      | golgi associated, gamma adaptin ear containing, ARF binding protein 1                                                                                                                                                                                                                                                    | Gga1                                                                                                                  | 0.634 | 0.028 | 1.443  | 0.357 | 0.765 | 0.132 | 0.847 | 0.508 |
| 1372408_at    | BI278620      | golgi associated, gamma adaptin ear containing, ARF binding protein 2                                                                                                                                                                                                                                                    | Gga2                                                                                                                  | 0.461 | 0.520 | 1.037  | 0.963 | 0.391 | 0.012 | 0.876 | 0.071 |
| 1379067_at    | AA956006      | golgi associated, gamma adaptin ear containing, ARF binding protein 3 (predicted)                                                                                                                                                                                                                                        | Gga3_predicted                                                                                                        | 1.610 | 0.193 | 1.135  | 0.222 | 0.873 | 0.443 | 1.367 | 0.046 |
| 1375574_at    | BE112983      | golgi associated, gamma adaptin ear containing, ARF binding protein 3 (predicted)                                                                                                                                                                                                                                        | Gga3_predicted                                                                                                        | 0.998 | 0.632 | 1.005  | 0.939 | 1.003 | 0.985 | 1.001 | 0.955 |
| 1381164_at    | BF386935      | Golgi autoantigen, golgin subfamily a, 1 (predicted)                                                                                                                                                                                                                                                                     | Golga1_predicted                                                                                                      | 1.110 | 0.695 | 1.071  | 0.285 | 0.904 | 0.943 | 0.932 | 0.694 |
| 1378079_at    | BI295829      | golgi autoantigen, golgin subfamily a, 3 (predicted) /// similar to male-enhanced antigen-2 (predicted)                                                                                                                                                                                                                  | Golga3_predicted ///<br>RGD1565361_predicted                                                                          | 1.178 | 0.094 | 3.096  | 0.003 | 1.149 | 0.177 | 1.842 | 0.015 |
| 1376650_at    | BF399323      | golgi autoantigen, golgin subfamily a, 5                                                                                                                                                                                                                                                                                 | Golga5                                                                                                                | 0.258 | 0.126 | 0.370  | 0.000 | 0.262 | 0.005 | 0.390 | 0.007 |
| 1398895_at    | BM389419      | golgi autoantigen, golgin subfamily a, 7                                                                                                                                                                                                                                                                                 | Golga7                                                                                                                | 0.931 | 0.644 | 1.164  | 0.442 | 0.821 | 0.238 | 1.232 | 0.905 |
| 1387979_at    | D25543        | golgi autoantigen, golgin subfamily b, macrogolgin 1                                                                                                                                                                                                                                                                     | Golgb1                                                                                                                | 0.892 | 0.228 | 0.903  | 0.447 | 1.120 | 0.371 | 0.719 | 0.040 |
| 1390050_at    | BI288898      | golgi phosphoprotein 2 (predicted)                                                                                                                                                                                                                                                                                       | Golph2_predicted                                                                                                      | 0.560 | 0.150 | 0.674  | 0.223 | 0.344 | 0.011 | 0.590 | 0.040 |

|              |           |                                                                     |                  |        |       |         |       |        |       |        |       |
|--------------|-----------|---------------------------------------------------------------------|------------------|--------|-------|---------|-------|--------|-------|--------|-------|
| 1373754_at   | AI599232  | Golgi phosphoprotein 2 (predicted)                                  | Golph2_predicted | 0.504  | 0.201 | 0.609   | 0.002 | 0.249  | 0.001 | 0.428  | 0.022 |
| 1369571_at   | NM_023977 | golgi phosphoprotein 3                                              | Golph3           | 0.998  | 0.989 | 0.996   | 0.977 | 0.998  | 0.986 | 1.004  | 0.985 |
| 1395291_at   | BF396777  | Golgi phosphoprotein 3-like                                         | Golph3l          | 0.854  | 0.283 | 1.423   | 0.331 | 0.358  | 0.482 | 1.230  | 0.868 |
| 1378352_at   | BM392166  | golgi phosphoprotein 3-like                                         | Golph3l          | 0.808  | 0.624 | 0.916   | 0.808 | 0.543  | 0.003 | 0.835  | 0.056 |
| 1398606_at   | BM391878  | golgi phosphoprotein 4                                              | Golph4           | 0.594  | 0.230 | 0.662   | 0.003 | 0.572  | 0.034 | 0.524  | 0.008 |
| 1370325_at   | AF110267  | golgi reassembly stacking protein 2                                 | Gorasp2          | 0.669  | 0.644 | 1.237   | 0.151 | 0.726  | 0.078 | 0.950  | 0.337 |
| 1388796_at   | AI169291  | Golgi SNAP receptor complex member 1                                | Gosr1            | 1.152  | 0.511 | 0.737   | 0.274 | 1.378  | 0.446 | 0.877  | 0.244 |
| 1395555_at   | AW916706  | golgi SNAP receptor complex member 1                                | Gosr1            | 0.995  | 0.992 | 1.156   | 0.309 | 1.023  | 0.923 | 1.002  | 0.949 |
| 1374900_at   | BM388807  | golgi SNAP receptor complex member 2                                | Gosr2            | 0.677  | 0.350 | 0.689   | 0.078 | 0.419  | 0.015 | 0.751  | 0.051 |
| 1375438_at   | AA964687  | golgi SNAP receptor complex member 2                                | Gosr2            | 0.625  | 0.548 | 0.882   | 0.240 | 0.551  | 0.009 | 0.794  | 0.017 |
| 1370031_at   | NM_031685 | golgi SNAP receptor complex member 2                                | Gosr2            | 0.828  | 0.974 | 1.313   | 0.877 | 0.390  | 0.029 | 1.091  | 0.968 |
| 1389077_at   | AI179974  | golgi transport 1 homolog B (S. cerevisiae) (predicted)             | Golt1b_predicted | 0.547  | 0.021 | 0.655   | 0.142 | 0.544  | 0.026 | 0.561  | 0.021 |
| 1383543_at   | AW918220  | golgi transport 1 homolog B (S. cerevisiae) (predicted)             | Golt1b_predicted | 0.958  | 0.733 | 1.024   | 0.433 | 1.067  | 0.467 | 0.935  | 0.145 |
| 1372330_at   | BM391371  | goliath                                                             | LOC652955        | 0.562  | 0.031 | 0.462   | 0.000 | 0.558  | 0.035 | 0.479  | 0.010 |
| 1368775_at   | NM_133563 | gonadotropin inducible ovarian transcription factor 1               | Giot1            | 0.319  | 0.008 | 0.406   | 0.009 | 0.463  | 0.375 | 0.531  | 0.193 |
| 1370417_at   | M15527    | gonadotropin-releasing hormone 1                                    | Gnrh1            | 1.936  | 0.827 | 1.628   | 0.057 | 3.565  | 0.024 | 1.995  | 0.017 |
| 1371939_at   | AI171369  | GPI-anchored membrane protein 1                                     | Gpiap1           | 0.766  | 0.233 | 1.063   | 0.448 | 0.703  | 0.009 | 1.073  | 0.112 |
| 1395412_at   | BF546337  | GPI-anchored membrane protein 1                                     | Gpiap1           | 0.919  | 0.834 | 1.226   | 0.780 | 0.562  | 0.115 | 1.071  | 0.937 |
| 1380358_at   | AW529415  | GPI-anchored membrane protein 1                                     | Gpiap1           | 1.140  | 0.980 | 1.017   | 0.200 | 1.006  | 0.675 | 1.303  | 0.266 |
| 1387241_at   | NM_031696 | G-protein coupled receptor 88                                       | Gpr88            | 0.877  | 0.502 | 0.672   | 0.302 | 0.781  | 0.265 | 0.583  | 0.244 |
| 1372383_at   | AW435429  | G-protein signalling modulator 1 (AGS3-like, C. elegans)            | Gpsm1            | 0.109  | 0.005 | 0.405   | 0.000 | 0.062  | 0.017 | 0.545  | 0.033 |
| 1370590_at   | AF107723  | G-protein signalling modulator 1 (AGS3-like, C. elegans)            | Gpsm1            | 0.889  | 0.993 | 0.567   | 0.021 | 0.999  | 0.993 | 0.572  | 0.031 |
| 1378128_at   | BM383749  | Grainyhead-like 1 (Drosophila) (predicted)                          | Grh1l_predicted  | 1.382  | 0.257 | 1.543   | 0.136 | 0.976  | 0.923 | 1.009  | 0.964 |
| 1382353_at   | AA999160  | grainyhead-like 1 (Drosophila) (predicted)                          | Grh1l_predicted  | 1.234  | 0.481 | 1.199   | 0.102 | 1.129  | 0.452 | 1.091  | 0.084 |
| 1385089_at   | BM386731  | Grainyhead-like 1 (Drosophila) (predicted)                          | Grh1l_predicted  | 0.950  | 0.708 | 1.530   | 0.355 | 0.688  | 0.059 | 1.012  | 0.965 |
| 1374043_at   | AI317841  | GRAM domain containing 3                                            | Gramd3           | 1.492  | 0.054 | 0.590   | 0.003 | 2.235  | 0.005 | 1.030  | 0.512 |
| 1398664_at   | C06752    | GRAM domain containing 3                                            | Gramd3           | 2.911  | 0.311 | 1.682   | 0.012 | 3.576  | 0.362 | 1.243  | 0.360 |
| 1384177_at   | BI281497  | GRAM domain containing 3                                            | Gramd3           | 1.311  | 0.449 | 1.620   | 0.026 | 1.981  | 0.009 | 1.428  | 0.033 |
| 1386893_at   | NM_017113 | granulin                                                            | Grn              | 2.407  | 0.013 | 3.659   | 0.000 | 2.791  | 0.002 | 4.498  | 0.000 |
| 1371964_at   | BM385050  | G-rich RNA sequence binding factor 1                                | Grsf1            | 0.708  | 0.353 | 1.058   | 0.473 | 0.599  | 0.043 | 1.091  | 0.420 |
| 1368909_a_at | NM_053807 | GRIP1 associated protein 1                                          | Gripap1          | 1.765  | 0.005 | 1.273   | 0.120 | 2.393  | 0.015 | 1.123  | 0.068 |
| 1368288_at   | NM_012564 | group specific component                                            | Gc               | 0.684  | 0.240 | 0.376   | 0.007 | 0.606  | 0.092 | 0.555  | 0.027 |
| 1368289_at   | AA944965  | group specific component                                            | Gc               | 1.046  | 0.720 | 0.509   | 0.006 | 0.604  | 0.017 | 0.446  | 0.190 |
| 1379990_at   | BG380925  | Growth and transformation-dependent protein                         | LOC360721        | 0.960  | 0.101 | 1.417   | 0.013 | 1.060  | 0.115 | 1.078  | 0.185 |
| 1368947_at   | NM_024127 | growth arrest and DNA-damage-inducible 45 alpha                     | Gadd45a          | 1.115  | 0.766 | 2.456   | 0.036 | 0.831  | 0.049 | 2.212  | 0.068 |
| 1372016_at   | BI287978  | growth arrest and DNA-damage-inducible 45 beta                      | Gadd45b          | 44.522 | 0.000 | 131.035 | 0.000 | 21.005 | 0.006 | 38.806 | 0.007 |
| 1388792_at   | AI599423  | growth arrest and DNA-damage-inducible 45 gamma                     | Gadd45g          | 3.851  | 0.002 | 3.533   | 0.010 | 2.428  | 0.007 | 1.887  | 0.099 |
| 1371896_at   | AI411436  | growth arrest and DNA-damage-inducible, gamma interacting protein 1 | Gadd45gip1       | 0.603  | 0.275 | 0.984   | 0.443 | 0.555  | 0.019 | 1.198  | 0.297 |
| 1392818_at   | BM384139  | growth arrest specific 5                                            | Gas5             | 0.886  | 0.175 | 0.922   | 0.346 | 0.835  | 0.010 | 1.137  | 0.229 |
| 1373499_at   | BF287008  | growth arrest specific 5                                            | Gas5             | 1.046  | 0.677 | 2.782   | 0.001 | 0.991  | 0.168 | 2.233  | 0.006 |
| 1383047_at   | AA957335  | growth arrest specific 6                                            | Gas6             | 0.438  | 0.015 | 1.011   | 0.165 | 0.594  | 0.004 | 0.972  | 0.840 |
| 1369735_at   | NM_057100 | growth arrest specific 6                                            | Gas6             | 0.777  | 0.169 | 0.410   | 0.010 | 0.708  | 0.052 | 0.542  | 0.032 |
| 1390791_at   | AI172537  | growth arrest-specific 2 like 1 (predicted)                         | Gas2l1_predicted | 1.003  | 0.825 | 0.969   | 0.141 | 1.002  | 0.964 | 1.336  | 0.026 |
| 1367930_at   | NM_017195 | growth associated protein 43                                        | Gap43            | 1.376  | 0.200 | 1.058   | 0.466 | 1.154  | 0.517 | 0.497  | 0.009 |
| 1382203_at   | AI549010  | growth differentiation factor 1 (predicted)                         | Gdf1_predicted   | 0.826  | 0.839 | 1.114   | 0.550 | 0.819  | 0.012 | 0.879  | 0.117 |
| 1374706_at   | BF407916  | Growth differentiation factor 11                                    | Gdf11            | 0.565  | 0.018 | 0.543   | 0.001 | 0.557  | 0.028 | 0.581  | 0.002 |
| 1370153_at   | NM_019216 | growth differentiation factor 15                                    | Gdf15            | 2.283  | 0.109 | 12.838  | 0.001 | 0.870  | 0.731 | 6.509  | 0.007 |
| 1368618_at   | NM_031623 | growth factor receptor bound protein 14                             | Grb14            | 0.998  | 0.996 | 0.998   | 0.272 | 1.014  | 0.970 | 1.004  | 0.971 |
| 1383246_at   | AI146111  | Growth factor receptor bound protein 2                              | Grb2             | 0.774  | 0.058 | 0.919   | 0.028 | 1.000  | 0.999 | 1.092  | 0.602 |
| 1368386_at   | NM_030846 | growth factor receptor bound protein 2                              | Grb2             | 1.139  | 0.115 | 1.104   | 0.932 | 0.842  | 0.490 | 0.777  | 0.025 |
| 1370617_at   | D49847    | growth factor receptor bound protein 2                              | Grb2             | 1.829  | 0.253 | 1.210   | 0.925 | 1.059  | 0.620 | 0.995  | 0.193 |
| 1368385_a_at | X62853    | growth factor receptor bound protein 2                              | Grb2             | 1.239  | 0.320 | 2.715   | 0.002 | 0.753  | 0.377 | 1.516  | 0.017 |
| 1393098_at   | BM386610  | Growth factor receptor bound protein 2                              | Grb2             | 0.970  | 0.710 | 1.009   | 0.597 | 1.073  | 0.776 | 1.047  | 0.307 |
| 1374394_at   | AI105305  | Growth factor receptor bound protein 2                              | Grb2             | 1.051  | 0.985 | 2.316   | 0.016 | 1.510  | 0.505 | 1.893  | 0.015 |
| 1393857_at   | AW253255  | Growth factor receptor bound protein 2                              | Grb2             | 1.191  | 0.999 | 0.980   | 0.995 | 1.740  | 0.905 | 1.011  | 0.477 |
| 1368334_at   | NM_053403 | growth factor receptor bound protein 7                              | Grb7             | 0.999  | 0.989 | 1.001   | 0.127 | 0.788  | 0.145 | 0.871  | 0.131 |
| 1367867_at   | NM_013222 | growth factor, erv1 homolog (S. cerevisiae)                         | Gfer             | 0.907  | 0.102 | 7.168   | 0.002 | 0.507  | 0.010 | 3.663  | 0.011 |
| 1371574_at   | BF284759  | growth hormone inducible transmembrane protein                      | Ghitm            | 1.184  | 0.409 | 2.248   | 0.003 | 1.192  | 0.194 | 2.269  | 0.000 |
| 1373142_at   | AA858928  | Growth hormone inducible transmembrane protein                      | Ghitm            | 0.891  | 0.516 | 1.495   | 0.026 | 1.192  | 0.845 | 1.832  | 0.005 |
| 1368924_at   | NM_017094 | growth hormone receptor                                             | Ghr              | 0.413  | 0.026 | 0.308   | 0.001 | 0.491  | 0.020 | 0.441  | 0.002 |
| 1373803_a_at | AI170771  | growth hormone receptor                                             | Ghr              | 0.611  | 0.159 | 0.491   | 0.034 | 0.635  | 0.011 | 0.456  | 0.019 |

|              |           |                                                                                                            |                                             |         |       |         |       |          |       |         |       |
|--------------|-----------|------------------------------------------------------------------------------------------------------------|---------------------------------------------|---------|-------|---------|-------|----------|-------|---------|-------|
| 1368552_at   | NM_024487 | GrpE-like 1, mitochondrial                                                                                 | Grpel1                                      | 0.624   | 0.771 | 1.297   | 0.207 | 0.596    | 0.149 | 1.372   | 0.020 |
| 1382351_at   | AI069972  | GTP binding protein (gene overexpressed in skeletal muscle) (predicted)                                    | Gem_predicted                               | 0.366   | 0.014 | 0.323   | 0.003 | 0.314    | 0.002 | 0.319   | 0.012 |
| 1374489_at   | BF282573  | GTP binding protein 2                                                                                      | Gtpbp2                                      | 2.714   | 0.001 | 8.708   | 0.000 | 2.020    | 0.010 | 6.777   | 0.004 |
| 1398438_at   | BE118548  | GTP binding protein 3                                                                                      | Gtpbp3                                      | 0.983   | 0.480 | 0.990   | 0.545 | 1.001    | 0.697 | 1.007   | 0.934 |
| 1370144_at   | NM_053689 | GTP binding protein 4                                                                                      | Gtpbp4                                      | 0.571   | 0.138 | 1.333   | 0.041 | 0.660    | 0.008 | 1.969   | 0.031 |
| 1372869_at   | BE109202  | GTP binding protein 4                                                                                      | Gtpbp4                                      | 0.823   | 0.435 | 1.930   | 0.000 | 1.015    | 0.739 | 1.398   | 0.014 |
| 1393326_s_at | BG378917  | GTP binding protein 6 (putative) (predicted)                                                               | Gtpbp6_predicted                            | 0.999   | 0.977 | 1.263   | 0.141 | 0.992    | 0.985 | 0.999   | 0.843 |
| 1380230_at   | AI639457  | GTP cyclohydrolase 1                                                                                       | Gch                                         | 2.034   | 0.042 | 1.120   | 0.517 | 1.184    | 0.014 | 0.514   | 0.075 |
| 1387221_at   | NM_024356 | GTP cyclohydrolase 1                                                                                       | Gch                                         | 1.670   | 0.052 | 1.898   | 0.029 | 1.299    | 0.090 | 1.506   | 0.126 |
| 1368503_at   | AA859496  | GTP cyclohydrolase 1                                                                                       | Gch                                         | 0.999   | 0.986 | 1.338   | 0.509 | 0.982    | 0.731 | 0.995   | 0.183 |
| 1375878_at   | BE102596  | GTPase activating protein and VPS9 domains 1 (predicted)                                                   | Gapvd1_predicted                            | 0.759   | 0.365 | 1.115   | 0.040 | 0.889    | 0.996 | 1.002   | 0.966 |
| 1390217_at   | BF283227  | GTPase activating RANGAP domain-like 1                                                                     | Garn1                                       | 0.730   | 0.006 | 0.679   | 0.036 | 0.797    | 0.065 | 0.842   | 0.167 |
| 1387405_at   | NM_020083 | GTPase activating RANGAP domain-like 1                                                                     | Garn1                                       | 0.881   | 0.187 | 0.731   | 0.044 | 1.189    | 0.380 | 0.573   | 0.049 |
| 1395385_at   | BF548145  | GTPase activating RANGAP domain-like 1                                                                     | Garn1                                       | 0.951   | 0.205 | 0.541   | 0.035 | 1.130    | 0.771 | 0.745   | 0.082 |
| 1368994_a_at | AF041107  | GTPase activating RANGAP domain-like 1                                                                     | Garn1                                       | 1.067   | 0.527 | 0.928   | 0.230 | 0.908    | 0.393 | 0.934   | 0.279 |
| 1392322_at   | BM388319  | GTPase, IMAP family member 7                                                                               | Gimap7                                      | 1.177   | 0.394 | 1.141   | 0.092 | 1.207    | 0.521 | 0.995   | 0.981 |
| 1387659_at   | AF245172  | guanine deaminase                                                                                          | Gda                                         | 1.271   | 0.215 | 3.541   | 0.001 | 1.986    | 0.147 | 2.108   | 0.113 |
| 1377577_at   | BI283031  | guanine monphosphate synthetase                                                                            | Gmps                                        | 0.749   | 0.214 | 1.805   | 0.001 | 0.738    | 0.013 | 1.482   | 0.006 |
| 1380373_at   | BF397926  | guanine monphosphate synthetase                                                                            | Gmps                                        | 0.996   | 0.987 | 1.642   | 0.058 | 1.000    | 0.998 | 0.909   | 0.067 |
| 1388455_at   | AA799996  | guanine nucleotide binding protein (G protein), gamma 10                                                   | Gng10                                       | 0.708   | 0.537 | 0.490   | 0.001 | 0.596    | 0.129 | 0.423   | 0.021 |
| 1392471_at   | BI302750  | Guanine nucleotide binding protein (G protein), gamma 12                                                   | Gng12                                       | 1.956   | 0.034 | 1.528   | 0.024 | 1.658    | 0.009 | 1.269   | 0.072 |
| 1377739_at   | AI576549  | guanine nucleotide binding protein (G protein), gamma 12                                                   | Gng12                                       | 1.320   | 0.275 | 4.269   | 0.001 | 0.660    | 0.049 | 3.454   | 0.001 |
| 1387342_at   | BM389548  | guanine nucleotide binding protein (G protein), gamma 5 subunit                                            | Gng5                                        | 1.244   | 0.117 | 3.770   | 0.001 | 1.033    | 0.620 | 3.387   | 0.001 |
| 1367844_at   | M12672    | guanine nucleotide binding protein, alpha inhibiting 2                                                     | Gnai2                                       | 0.726   | 0.858 | 0.780   | 0.194 | 0.600    | 0.360 | 0.788   | 0.057 |
| 1368030_at   | J03219    | guanine nucleotide binding protein, alpha inhibiting 3                                                     | Gnai3                                       | 1.199   | 0.322 | 2.248   | 0.093 | 1.002    | 0.833 | 0.999   | 0.242 |
| 1368029_at   | NM_013106 | guanine nucleotide binding protein, alpha inhibiting 3                                                     | Gnai3                                       | 1.278   | 0.424 | 1.804   | 0.016 | 1.678    | 0.301 | 1.488   | 0.010 |
| 1368879_a_at | AF413212  | guanine nucleotide binding protein, alpha o                                                                | Gnao                                        | 0.628   | 0.207 | 0.982   | 0.938 | 0.706    | 0.079 | 0.825   | 0.306 |
| 1375902_at   | AI231065  | Guanine nucleotide binding protein, alpha o                                                                | Gnao                                        | 0.902   | 0.738 | 1.111   | 0.056 | 0.689    | 0.114 | 0.878   | 0.763 |
| 1383055_at   | AW143805  | Guanine nucleotide binding protein, alpha q polypeptide                                                    | Gnaq                                        | 0.567   | 0.035 | 0.447   | 0.001 | 0.604    | 0.012 | 0.624   | 0.042 |
| 1375745_at   | BE117491  | Guanine nucleotide binding protein, alpha q polypeptide                                                    | Gnaq                                        | 0.634   | 0.110 | 0.401   | 0.018 | 0.618    | 0.174 | 0.508   | 0.010 |
| 1385158_at   | BI301125  | Guanine nucleotide binding protein, alpha stimulating, olfactory type                                      | Gnal                                        | 0.846   | 0.024 | 0.256   | 0.008 | 0.827    | 0.039 | 0.612   | 0.057 |
| 1382112_at   | BM385698  | Guanine nucleotide binding protein, alpha stimulating, olfactory type                                      | Gnal                                        | 0.897   | 0.198 | 0.582   | 0.016 | 1.055    | 0.910 | 0.768   | 0.008 |
| 1382129_at   | AI136136  | Guanine nucleotide binding protein, alpha stimulating, olfactory type                                      | Gnal                                        | 1.409   | 0.233 | 0.209   | 0.004 | 0.999    | 0.519 | 0.515   | 0.023 |
| 1384229_at   | AI576080  | Guanine nucleotide binding protein, alpha stimulating, olfactory type                                      | Gnal                                        | 1.144   | 0.912 | 1.008   | 0.711 | 1.820    | 0.043 | 1.006   | 0.835 |
| 1368185_at   | NM_013189 | guanine nucleotide binding protein, alpha z subunit                                                        | Gnaz                                        | 1.543   | 0.033 | 0.595   | 0.005 | 1.453    | 0.007 | 0.725   | 0.188 |
| 1367732_at   | U34958    | guanine nucleotide binding protein, beta 1                                                                 | Gnb1                                        | 1.251   | 0.162 | 2.879   | 0.001 | 1.136    | 0.614 | 2.601   | 0.003 |
| 1382982_at   | AI230669  | Guanine nucleotide binding protein, beta 1                                                                 | Gnb1                                        | 1.077   | 0.682 | 1.317   | 0.280 | 1.368    | 0.992 | 1.081   | 0.810 |
| 1367731_at   | NM_030987 | guanine nucleotide binding protein, beta 1                                                                 | Gnb1                                        | 0.904   | 0.704 | 0.617   | 0.016 | 0.715    | 0.179 | 0.563   | 0.021 |
| 1382105_at   | AI603217  | guanine nucleotide binding protein, beta 5                                                                 | Gnb5                                        | 0.406   | 0.137 | 0.367   | 0.000 | 0.313    | 0.001 | 0.210   | 0.036 |
| 1370867_at   | BM384381  | guanine nucleotide binding protein, beta polypeptide 2                                                     | Gnb2                                        | 1.400   | 0.312 | 1.148   | 0.029 | 1.230    | 0.458 | 1.173   | 0.042 |
| 1398863_at   | AF277892  | guanine nucleotide binding protein, beta polypeptide 2                                                     | Gnb2                                        | 1.168   | 0.765 | 0.983   | 0.572 | 1.052    | 0.626 | 1.363   | 0.098 |
| 1398391_at   | BG379297  | guanine nucleotide binding protein-like 1                                                                  | Gnl1                                        | 0.651   | 0.255 | 1.218   | 0.934 | 0.481    | 0.129 | 1.095   | 0.444 |
| 1374804_at   | AI060050  | guanine nucleotide binding protein-like 2 (nucleolar)                                                      | Gnl2                                        | 0.537   | 0.122 | 1.557   | 0.271 | 0.798    | 0.070 | 0.851   | 0.622 |
| 1388953_at   | AA892598  | guanine nucleotide binding protein-like 3 (nucleolar)                                                      | Gnl3                                        | 0.681   | 0.052 | 2.246   | 0.002 | 0.573    | 0.035 | 1.661   | 0.010 |
| 1387855_at   | BI278628  | guanosine diphosphate dissociation inhibitor 1                                                             | Gdi1                                        | 0.713   | 0.001 | 0.537   | 0.005 | 0.824    | 0.026 | 0.562   | 0.013 |
| 1387079_at   | M57405    | guanylate cyclase 1, soluble, alpha 3                                                                      | Gucy1a3                                     | 1.151   | 0.688 | 1.307   | 0.264 | 1.073    | 0.368 | 0.758   | 0.260 |
| 1369162_at   | NM_013170 | guanylate cyclase 2C                                                                                       | Gucy2c                                      | 0.306   | 0.001 | 0.393   | 0.041 | 0.370    | 0.001 | 0.292   | 0.048 |
| 1375455_at   | AI716086  | guanylate cyclase activator 1a (retina) (predicted)                                                        | Guca1a_predicted                            | 0.811   | 0.176 | 1.089   | 0.218 | 0.791    | 0.177 | 0.999   | 0.720 |
| 1371743_at   | AA800291  | guanylate kinase 1                                                                                         | Guk1                                        | 0.530   | 0.134 | 0.660   | 0.038 | 0.566    | 0.022 | 0.739   | 0.048 |
| 1368332_at   | NM_133624 | guanylate nucleotide binding protein 2                                                                     | Gbp2                                        | 504.100 | 0.002 | 429.255 | 0.007 | 1223.375 | 0.004 | 615.861 | 0.004 |
| 1385051_at   | BE108569  | Guanylate nucleotide binding protein 4 (predicted)                                                         | Gbp4_predicted                              | 127.686 | 0.000 | 41.990  | 0.001 | 427.678  | 0.000 | 123.393 | 0.000 |
| 1382950_at   | AA901350  | Guanylate nucleotide binding protein 4 (predicted)                                                         | Gbp4_predicted                              | 355.187 | 0.007 | 55.935  | 0.004 | 407.518  | 0.005 | 74.146  | 0.002 |
| 1376285_at   | BM390519  | GULP, engulfment adaptor PTB domain containing 1                                                           | Gulp1                                       | 0.255   | 0.006 | 0.207   | 0.004 | 0.371    | 0.017 | 0.402   | 0.001 |
| 1367759_at   | NM_012578 | H1 histone family, member 0                                                                                | H1f0                                        | 0.539   | 0.126 | 0.622   | 0.005 | 0.422    | 0.020 | 0.697   | 0.052 |
| 1380595_at   | AI071495  | H2A histone family, member V (predicted)                                                                   | H2afv_predicted                             | 0.986   | 0.600 | 1.013   | 0.485 | 0.960    | 0.602 | 0.961   | 0.664 |
| 1388827_at   | AW523419  | H2A histone family, member V (predicted) /// similar to H2A histone family, member V isoform 1 (predicted) | H2afv_predicted ///<br>RGD1560813_predicted | 0.993   | 0.975 | 0.964   | 0.074 | 1.477    | 0.064 | 1.440   | 0.712 |
| 1370004_at   | M99065    | H2A histone family, member Y                                                                               | H2afy                                       | 0.713   | 0.639 | 1.697   | 0.010 | 0.852    | 0.330 | 1.347   | 0.513 |
| 1386861_at   | NM_022674 | H2A histone family, member Z                                                                               | H2afz                                       | 0.687   | 0.287 | 1.062   | 0.456 | 0.628    | 0.116 | 1.009   | 0.093 |
| 1390019_at   | BM390456  | H3 histone, family 3B                                                                                      | H3f3b                                       | 0.860   | 0.230 | 0.575   | 0.105 | 0.840    | 0.253 | 0.573   | 0.002 |
| 1398888_at   | AI408819  | H3 histone, family 3B                                                                                      | H3f3b                                       | 0.951   | 0.510 | 1.175   | 0.010 | 0.901    | 0.837 | 1.415   | 0.002 |

|            |           |                                                                                                                 |                          |        |       |        |       |        |       |       |       |
|------------|-----------|-----------------------------------------------------------------------------------------------------------------|--------------------------|--------|-------|--------|-------|--------|-------|-------|-------|
| 1370190_at | BG663226  | H3 histone, family 3B                                                                                           | H3f3b                    | 1.066  | 0.694 | 1.380  | 0.012 | 0.898  | 0.372 | 1.479 | 0.002 |
| 1398849_at | AI177503  | H3 histone, family 3B                                                                                           | H3f3b                    | 0.752  | 0.887 | 2.316  | 0.004 | 0.459  | 0.284 | 1.866 | 0.018 |
| 1385988_at | BF287243  | H6 homeo box 1 (predicted)                                                                                      | Hmx1_predicted           | 6.224  | 0.063 | 27.250 | 0.001 | 2.564  | 0.095 | 9.525 | 0.005 |
| 1387036_at | NM_024360 | hairy and enhancer of split 1 (Drosophila)                                                                      | Hes1                     | 1.001  | 0.991 | 0.997  | 0.824 | 1.316  | 0.131 | 1.000 | 0.974 |
| 1374625_at | AI176616  | hairy and enhancer of split 6 (Drosophila)                                                                      | Hes6                     | 0.387  | 0.019 | 0.955  | 0.490 | 0.370  | 0.169 | 0.886 | 0.634 |
| 1388729_at | BF282474  | Harvey rat sarcoma oncogene, subgroup R (predicted)                                                             | Rras_predicted           | 1.011  | 0.611 | 2.342  | 0.006 | 1.301  | 0.049 | 1.871 | 0.177 |
| 1371255_at | BG379941  | Harvey rat sarcoma viral (v-Ha-ras) oncogene homolog                                                            | Hras                     | 0.690  | 0.655 | 1.794  | 0.020 | 0.411  | 0.014 | 1.583 | 0.023 |
| 1372344_at | AI175760  | Hbs1-like (S. cerevisiae)                                                                                       | Hbs1l                    | 1.390  | 0.012 | 2.558  | 0.001 | 1.267  | 0.013 | 1.928 | 0.000 |
| 1384378_at | BI293046  | HCR (a-helix coiled-coil rod homolog)                                                                           | Hcr                      | 4.242  | 0.008 | 4.900  | 0.000 | 8.958  | 0.008 | 7.428 | 0.006 |
| 1383316_at | BF409313  | HD domain containing 2 (predicted)                                                                              | Hddc2_predicted          | 1.001  | 0.968 | 0.989  | 0.229 | 0.953  | 0.790 | 1.000 | 0.183 |
| 1372762_at | AA849729  | HD domain containing 3 (predicted)                                                                              | Hddc3_predicted          | 0.686  | 0.551 | 0.776  | 0.112 | 0.339  | 0.017 | 0.660 | 0.353 |
| 1383685_at | BI276972  | HEAT repeat containing 1 (predicted)                                                                            | Heatr1_predicted         | 0.489  | 0.069 | 1.426  | 0.046 | 0.638  | 0.019 | 2.203 | 0.038 |
| 1386898_at | NM_012966 | heat shock 10 kDa protein 1 (chaperonin 10)                                                                     | Hspe1                    | 0.614  | 0.175 | 2.716  | 0.016 | 0.484  | 0.001 | 1.835 | 0.123 |
| 1388898_at | AI236601  | heat shock 105kDa/110kDa protein 1                                                                              | Hsph1                    | 0.712  | 0.248 | 2.015  | 0.008 | 0.742  | 0.059 | 1.503 | 0.048 |
| 1385620_at | BF525282  | heat shock 105kDa/110kDa protein 1                                                                              | Hsph1                    | 0.543  | 0.365 | 3.564  | 0.003 | 0.313  | 0.129 | 1.354 | 0.417 |
| 1388721_at | BG380282  | heat shock 22kDa protein 8                                                                                      | Hspb8                    | 35.812 | 0.006 | 9.021  | 0.006 | 12.673 | 0.003 | 5.919 | 0.017 |
| 1368247_at | NM_031971 | heat shock 70kD protein 1A /// heat shock 70kD protein 1B (mapped)                                              | Hspa1a /// Hspa1b_mapped | 1.212  | 0.801 | 5.574  | 0.008 | 1.247  | 0.332 | 1.515 | 0.126 |
| 1370912_at | BI278231  | heat shock 70kD protein 1B (mapped)                                                                             | Hspa1b_mapped            | 1.189  | 0.982 | 6.148  | 0.010 | 1.171  | 0.574 | 2.034 | 0.098 |
| 1384295_at | AI111363  | heat shock 70kDa protein 14                                                                                     | Hspa14                   | 0.854  | 0.070 | 1.098  | 0.058 | 1.233  | 0.110 | 1.139 | 0.225 |
| 1394200_at | BF410146  | heat shock 70kDa protein 2                                                                                      | Hspa2                    | 1.067  | 0.467 | 0.946  | 0.924 | 0.632  | 0.166 | 1.267 | 0.376 |
| 1378002_at | BF401583  | heat shock 70kDa protein 4-like (predicted)                                                                     | Hspa4l_predicted         | 0.812  | 0.522 | 1.437  | 0.058 | 0.640  | 0.621 | 1.155 | 0.384 |
| 1375626_at | BF416562  | Heat shock 70kDa protein 4-like (predicted)                                                                     | Hspa4l_predicted         | 1.412  | 0.831 | 0.679  | 0.294 | 1.813  | 0.190 | 0.578 | 0.061 |
| 1370283_at | M14050    | heat shock 70kDa protein 5 (glucose-regulated protein)                                                          | Hspa5                    | 0.890  | 0.964 | 1.456  | 0.000 | 0.913  | 0.268 | 1.348 | 0.003 |
| 1383680_at | BG376339  | heat shock 70kDa protein 5 binding protein 1                                                                    | Hspa5bp1                 | 1.143  | 0.610 | 0.808  | 0.064 | 1.084  | 0.234 | 1.014 | 0.121 |
| 1391915_at | BE120145  | heat shock 70kDa protein 9A (predicted)                                                                         | Hspa9a_predicted         | 1.038  | 0.040 | 7.122  | 0.011 | 1.375  | 0.193 | 2.590 | 0.041 |
| 1388851_at | BI282281  | heat shock 70kDa protein 9A (predicted)                                                                         | Hspa9a_predicted         | 0.796  | 0.443 | 1.971  | 0.004 | 0.689  | 0.194 | 1.910 | 0.008 |
| 1389930_at | AI598451  | Heat shock 70kDa protein 9A (predicted)                                                                         | Hspa9a_predicted         | 1.338  | 0.471 | 3.028  | 0.354 | 0.559  | 0.104 | 2.067 | 0.919 |
| 1370690_at | S75280    | heat shock 70kDa protein 9A (predicted)                                                                         | Hspa9a_predicted         | 0.616  | 0.578 | 2.418  | 0.069 | 0.432  | 0.353 | 1.926 | 0.108 |
| 1375336_at | AI237389  | heat shock 90kDa protein 1, beta                                                                                | Hspcb                    | 0.747  | 0.239 | 1.543  | 0.047 | 0.591  | 0.102 | 1.191 | 0.818 |
| 1375335_at | BI285700  | heat shock 90kDa protein 1, beta                                                                                | Hspcb                    | 0.792  | 0.419 | 1.739  | 0.032 | 0.788  | 0.029 | 1.198 | 0.571 |
| 1387430_at | NM_031694 | heat shock factor 2                                                                                             | Hsf2                     | 0.872  | 0.190 | 1.743  | 0.045 | 0.772  | 0.103 | 1.420 | 0.106 |
| 1382598_at | BE111342  | heat shock factor 2                                                                                             | Hsf2                     | 0.915  | 0.450 | 1.293  | 0.022 | 1.000  | 0.692 | 1.344 | 0.003 |
| 1371490_at | BG666149  | heat shock factor binding protein 1                                                                             | Hsbp1                    | 0.745  | 0.768 | 0.361  | 0.046 | 0.745  | 0.166 | 0.473 | 0.000 |
| 1371783_at | AI009936  | heat shock protein                                                                                              | LOC290549                | 0.634  | 0.552 | 1.066  | 0.250 | 0.794  | 0.213 | 0.909 | 0.053 |
| 1386894_at | NM_022229 | heat shock protein 1 (chaperonin)                                                                               | Hspd1                    | 0.523  | 0.001 | 1.370  | 0.006 | 0.495  | 0.000 | 1.240 | 0.006 |
| 1372701_at | AI237597  | heat shock protein 1, alpha                                                                                     | Hspca                    | 0.765  | 0.053 | 2.787  | 0.001 | 0.757  | 0.429 | 1.627 | 0.006 |
| 1388850_at | BG671521  | heat shock protein 1, alpha                                                                                     | Hspca                    | 0.674  | 0.231 | 3.057  | 0.003 | 0.793  | 0.075 | 1.661 | 0.377 |
| 1370344_at | AF077354  | heat shock protein 4                                                                                            | Hspa4                    | 0.448  | 0.152 | 0.636  | 0.206 | 0.578  | 0.107 | 0.441 | 0.071 |
| 1394557_at | AW535242  | Heat shock protein 4                                                                                            | Hspa4                    | 0.914  | 0.581 | 1.061  | 0.844 | 0.878  | 0.648 | 1.195 | 0.481 |
| 1398240_at | NM_024351 | heat shock protein 8                                                                                            | Hspa8                    | 0.665  | 0.047 | 1.508  | 0.003 | 0.678  | 0.010 | 1.208 | 0.008 |
| 1387898_at | D29960    | heat shock protein, alpha-crystallin-related, B6                                                                | Hspb6                    | 0.420  | 0.014 | 0.200  | 0.004 | 0.410  | 0.016 | 0.411 | 0.029 |
| 1370917_at | AI172496  | heat shock transcription factor 1                                                                               | Hsf1                     | 1.365  | 0.144 | 2.614  | 0.034 | 1.259  | 0.057 | 2.614 | 0.032 |
| 1368060_at | NM_031714 | heat-responsive protein 12                                                                                      | Hrsp12                   | 0.666  | 0.447 | 0.324  | 0.003 | 0.825  | 0.082 | 0.512 | 0.005 |
| 1374599_at | BM386001  | hect (homologous to the E6-AP (UBE3A) carboxyl terminus) domain and RCC1 (CHC1)-like domain (RLD) 1 (predicted) | Herc1_predicted          | 1.090  | 0.148 | 1.017  | 0.889 | 1.059  | 0.333 | 1.043 | 0.142 |
| 1394746_at | AI180352  | hect (homologous to the E6-AP (UBE3A) carboxyl terminus) domain and RCC1 (CHC1)-like domain (RLD) 1 (predicted) | Herc1_predicted          | 1.006  | 0.865 | 0.841  | 0.781 | 1.067  | 0.434 | 0.717 | 0.014 |
| 1390648_at | AW523544  | Hect (homologous to the E6-AP (UBE3A) carboxyl terminus) domain and RCC1 (CHC1)-like domain (RLD) 2 (predicted) | Herc2_predicted          | 0.691  | 0.033 | 0.908  | 0.237 | 1.088  | 0.557 | 0.989 | 0.422 |
| 1381195_at | BF389423  | Hect (homologous to the E6-AP (UBE3A) carboxyl terminus) domain and RCC1 (CHC1)-like domain (RLD) 2 (predicted) | Herc2_predicted          | 0.916  | 0.402 | 0.964  | 0.355 | 0.973  | 0.930 | 1.194 | 0.788 |
| 1375861_at | BE111332  | Hect domain and RLD 3 (predicted)                                                                               | Herc3_predicted          | 0.161  | 0.000 | 0.142  | 0.001 | 0.135  | 0.003 | 0.159 | 0.009 |
| 1389164_at | BI295026  | hect domain and RLD 3 (predicted)                                                                               | Herc3_predicted          | 1.662  | 0.090 | 0.361  | 0.009 | 1.688  | 0.274 | 0.719 | 0.366 |
| 1373381_at | AI236889  | hect domain and RLD 4                                                                                           | Herc4                    | 0.938  | 0.725 | 1.326  | 0.149 | 0.913  | 0.196 | 1.060 | 0.972 |
| 1371336_at | AA942716  | hematological and neurological expressed sequence 1                                                             | Hn1                      | 1.586  | 0.089 | 2.455  | 0.015 | 1.414  | 0.142 | 1.885 | 0.045 |
| 1388581_at | AI317868  | hematological and neurological expressed sequence 1                                                             | Hn1                      | 1.658  | 0.147 | 1.169  | 0.949 | 1.624  | 0.028 | 1.420 | 0.804 |
| 1372004_at | AI102065  | heme binding protein 1 (predicted)                                                                              | Hebp1_predicted          | 1.233  | 0.743 | 3.822  | 0.015 | 0.967  | 0.959 | 2.165 | 0.037 |
| 1382451_at | BM385477  | heme binding protein 2 (predicted)                                                                              | Hebp2_predicted          | 1.052  | 0.784 | 0.757  | 0.017 | 0.959  | 0.490 | 0.848 | 0.167 |
| 1370080_at | NM_012580 | heme oxygenase (decycling) 1                                                                                    | Hmox1                    | 0.732  | 0.888 | 9.148  | 0.004 | 0.428  | 0.050 | 7.135 | 0.001 |
| 1367903_at | J05405    | heme oxygenase (decycling) 2                                                                                    | Hmox2                    | 0.580  | 0.254 | 1.122  | 0.437 | 0.547  | 0.005 | 0.916 | 0.407 |

|               |               |                                                                                   |                      |       |       |        |       |        |       |        |       |
|---------------|---------------|-----------------------------------------------------------------------------------|----------------------|-------|-------|--------|-------|--------|-------|--------|-------|
| 1384358_at    | BM384625      | Heme oxygenase (decycling) 2                                                      | Hmox2                | 0.975 | 0.891 | 0.988  | 0.968 | 0.997  | 0.745 | 0.989  | 0.975 |
| 1392330_at    | BF417415      | HemK methyltransferase family member 2 (predicted)                                | Hemk2_predicted      | 0.916 | 0.746 | 0.920  | 0.555 | 1.333  | 0.024 | 1.001  | 0.997 |
| 1381428_a_at  | AI177364      | Hemochromatosis                                                                   | Hfe                  | 0.737 | 0.331 | 0.544  | 0.003 | 0.711  | 0.048 | 0.888  | 0.838 |
| 1399067_at    | AI229702      | hemochromatosis                                                                   | Hfe                  | 0.790 | 0.740 | 0.834  | 0.021 | 0.793  | 0.457 | 0.923  | 0.042 |
| 1388608_x_at  | AI577319      | hemoglobin alpha, adult chain 1                                                   | Hba-a1               | 0.957 | 0.845 | 0.812  | 0.987 | 1.001  | 0.305 | 0.713  | 0.204 |
| 1370240_x_at  | AI179404      | hemoglobin alpha, adult chain 1 /// hemoglobin alpha 2 chain                      | Hba-a1 /// LOC360504 | 1.097 | 0.936 | 0.999  | 0.963 | 1.023  | 0.727 | 0.973  | 0.979 |
| 1370065_at    | NM_053318     | hemopexin                                                                         | Hpx                  | 4.995 | 0.002 | 10.770 | 0.006 | 12.095 | 0.000 | 12.106 | 0.001 |
| 1369204_at    | NM_013185     | hemopoietic cell kinase                                                           | Hck                  | 0.998 | 0.604 | 0.997  | 0.115 | 1.005  | 0.489 | 0.999  | 0.495 |
| 1370834_at    | AF177430      | heparan sulfate (glucosamine) 3-O-sulfotransferase 1                              | Hs3st1               | 1.299 | 0.036 | 1.005  | 0.937 | 0.999  | 0.987 | 1.120  | 0.062 |
| 1382101_at    | AI714262      | heparan sulfate 2-O-sulfotransferase 1                                            | Hs2st1               | 1.004 | 0.178 | 0.687  | 0.369 | 1.286  | 0.105 | 0.849  | 0.420 |
| 1368983_at    | NM_012945     | heparin-binding EGF-like growth factor                                            | Hbegf                | 0.721 | 0.235 | 6.398  | 0.008 | 0.830  | 0.230 | 3.133  | 0.044 |
| 1386366_at    | AI231610      | Hepatitis B virus x associated protein (predicted)                                | Hbxap_predicted      | 1.307 | 0.060 | 2.536  | 0.030 | 0.997  | 0.699 | 2.257  | 0.057 |
| 1394010_at    | H32100        | hepatitis B virus x associated protein (predicted)                                | Hbxap_predicted      | 1.002 | 0.893 | 1.040  | 0.598 | 0.966  | 0.272 | 0.789  | 0.212 |
| 1377622_at    | AI717078      | hepatitis B virus x associated protein (predicted)                                | Hbxap_predicted      | 0.915 | 0.958 | 1.151  | 0.644 | 0.616  | 0.002 | 0.927  | 0.916 |
| 1372076_at    | BI294704      | hepatitis B virus x interacting protein (predicted)                               | Hbxip_predicted      | 1.213 | 0.332 | 2.251  | 0.012 | 0.913  | 0.362 | 1.999  | 0.007 |
| 1367817_at    | NM_053707     | hepatoma-derived growth factor                                                    | Hdgf                 | 0.993 | 0.741 | 2.049  | 0.000 | 0.818  | 0.033 | 1.723  | 0.006 |
| 1368026_at    | NM_133548     | hepatoma-derived growth factor, related protein 2                                 | Hdgfrp2              | 1.683 | 0.045 | 1.740  | 0.003 | 1.029  | 0.953 | 1.464  | 0.013 |
| 1370458_at    | AF389347      | hepatoma-derived growth factor, related protein 3                                 | Hdgfrp3              | 0.883 | 0.504 | 0.777  | 0.333 | 0.661  | 0.086 | 0.750  | 0.027 |
| 1382699_s_at  | AW920326      | Hermansky-Pudlak syndrome 1 homolog (human)                                       | Hps1                 | 0.637 | 0.112 | 0.821  | 0.492 | 0.917  | 0.487 | 1.039  | 0.217 |
| 1387096_at    | NM_040669     | Hermansky-Pudlak syndrome 1 homolog (human)                                       | Hps1                 | 0.993 | 0.976 | 0.989  | 0.904 | 0.953  | 0.508 | 0.982  | 0.960 |
| 1379443_at    | BE120719      | Hermansky-Pudlak syndrome 3 homolog (human) (predicted)                           | Hps3_predicted       | 0.993 | 0.128 | 1.017  | 0.911 | 1.025  | 0.481 | 1.219  | 0.073 |
| 1381919_at    | BI290986      | Hermansky-Pudlak syndrome 6                                                       | Hps6                 | 1.152 | 0.783 | 1.335  | 0.420 | 0.550  | 0.153 | 0.654  | 0.852 |
| 1388613_at    | BE113034      | HESB like domain containing 2                                                     | Hbld2                | 0.522 | 0.001 | 0.971  | 0.121 | 0.686  | 0.058 | 0.882  | 0.026 |
| 1388603_a_at  | BM384289      | HESB like domain containing 2                                                     | Hbld2                | 0.570 | 0.068 | 1.424  | 0.002 | 0.479  | 0.017 | 1.376  | 0.004 |
| 1371637_at    | AI411691      | heterochromatin protein 1, binding protein 3                                      | Hp1bp3               | 0.726 | 0.158 | 0.657  | 0.017 | 0.819  | 0.062 | 0.636  | 0.017 |
| 1395101_at    | BF396757      | Heterochromatin protein 1, binding protein 3                                      | Hp1bp3               | 1.019 | 0.299 | 1.113  | 0.836 | 0.801  | 0.240 | 1.015  | 0.312 |
| 1370309_a_at  | AJ238854      | heterogeneous nuclear ribonucleoprotein A/B                                       | Hnrpab               | 0.681 | 0.137 | 1.158  | 0.084 | 0.581  | 0.004 | 1.199  | 0.036 |
| 1372693_at    | AI408833      | heterogeneous nuclear ribonucleoprotein A1                                        | Hnrpa1               | 1.580 | 0.012 | 1.353  | 0.016 | 1.387  | 0.008 | 1.352  | 0.055 |
| 1387872_at    | BF396270      | heterogeneous nuclear ribonucleoprotein A1                                        | Hnrpa1               | 1.006 | 0.342 | 0.802  | 0.062 | 0.770  | 0.168 | 0.729  | 0.030 |
| 1398883_at    | BI296284      | heterogeneous nuclear ribonucleoprotein A2/B1 (predicted)                         | Hnrpa2b1_predicted   | 0.771 | 0.327 | 0.448  | 0.004 | 0.851  | 0.231 | 0.525  | 0.024 |
| 1395561_at    | BG666358      | heterogeneous nuclear ribonucleoprotein A2/B1 (predicted)                         | Hnrpa2b1_predicted   | 0.989 | 0.924 | 0.707  | 0.027 | 0.991  | 0.989 | 0.710  | 0.006 |
| 1374405_at    | AI233336      | heterogeneous nuclear ribonucleoprotein A3                                        | Hnrpa3               | 0.700 | 0.362 | 2.257  | 0.002 | 0.851  | 0.420 | 1.692  | 0.011 |
| 1394741_at    | AI409455      | Heterogeneous nuclear ribonucleoprotein A3                                        | Hnrpa3               | 0.864 | 0.853 | 1.907  | 0.132 | 1.090  | 0.578 | 0.985  | 0.684 |
| 1371505_at    | BG381750      | heterogeneous nuclear ribonucleoprotein C                                         | Hnrpc                | 1.151 | 0.484 | 2.246  | 0.001 | 1.153  | 0.299 | 2.048  | 0.006 |
| 1369971_a_at  | AB046616      | heterogeneous nuclear ribonucleoprotein D                                         | Hnrpd                | 0.734 | 0.340 | 1.470  | 0.039 | 0.741  | 0.387 | 1.203  | 0.002 |
| 1372810_at    | BF281256      | heterogeneous nuclear ribonucleoprotein D-like                                    | Hnrpdl               | 1.504 | 0.007 | 1.689  | 0.000 | 1.249  | 0.013 | 1.336  | 0.016 |
| 1370844_at    | BM387425      | heterogeneous nuclear ribonucleoprotein F                                         | Hnrpf                | 1.044 | 0.745 | 1.117  | 0.692 | 1.047  | 0.974 | 1.051  | 0.984 |
| 1367666_at    | NM_080896     | heterogeneous nuclear ribonucleoprotein H1                                        | Hnrph1               | 1.005 | 0.751 | 0.803  | 0.078 | 1.063  | 0.223 | 0.744  | 0.119 |
| 1375019_at    | AI101886      | heterogeneous nuclear ribonucleoprotein H3 (2H9) (predicted)                      | Hnrph3_predicted     | 1.955 | 0.003 | 1.740  | 0.008 | 2.320  | 0.019 | 1.838  | 0.006 |
| 1398797_at    | NM_057141     | heterogeneous nuclear ribonucleoprotein K                                         | Hnrpk                | 0.767 | 0.081 | 0.665  | 0.000 | 0.771  | 0.001 | 0.720  | 0.022 |
| 1367895_at    | AI577321      | heterogeneous nuclear ribonucleoprotein K                                         | Hnrpk                | 1.036 | 0.298 | 1.004  | 0.960 | 0.848  | 0.474 | 1.030  | 0.165 |
| 1398873_at    | BI279608      | heterogeneous nuclear ribonucleoprotein L                                         | Hnrpl                | 1.012 | 0.187 | 1.051  | 0.702 | 0.943  | 0.149 | 0.871  | 0.342 |
| 1391475_at    | AI235307      | heterogeneous nuclear ribonucleoprotein L-like (predicted)                        | Hnrpll_predicted     | 0.726 | 0.393 | 0.671  | 0.341 | 0.938  | 0.705 | 0.781  | 0.137 |
| 1397715_at    | AI716475      | Heterogeneous nuclear ribonucleoprotein M                                         | Hnrpm                | 1.452 | 0.032 | 1.659  | 0.320 | 1.964  | 0.089 | 0.915  | 0.138 |
| 1370919_at    | AI103467      | heterogeneous nuclear ribonucleoprotein M                                         | Hnrpm                | 0.845 | 0.149 | 0.785  | 0.009 | 0.807  | 0.077 | 0.777  | 0.007 |
| 1370536_at    | AF059530      | heterogeneous nuclear ribonucleoprotein methyltransferase-like 3 (S. cerevisiae)  | Hrmt113              | 0.704 | 0.016 | 1.096  | 0.194 | 0.685  | 0.009 | 1.052  | 0.423 |
| 1382697_at    | BF289134      | Heterogeneous nuclear ribonucleoprotein methyltransferase-like 3 (S. cerevisiae)  | Hrmt113              | 1.039 | 0.880 | 1.017  | 0.983 | 1.026  | 0.874 | 1.023  | 0.986 |
| 1373905_at    | AI178441      | heterogeneous nuclear ribonucleoprotein R                                         | Hnrpr                | 0.521 | 0.566 | 0.705  | 0.022 | 0.503  | 0.035 | 0.690  | 0.061 |
| 1370171_at    | AI058964      | heterogeneous nuclear ribonucleoprotein U                                         | Hnrpu                | 0.600 | 0.050 | 0.582  | 0.013 | 0.672  | 0.005 | 0.781  | 0.044 |
| 1370170_at    | AI177494      | heterogeneous nuclear ribonucleoprotein U                                         | Hnrpu                | 0.780 | 0.145 | 0.826  | 0.080 | 0.740  | 0.076 | 0.800  | 0.016 |
| 1399099_at    | BG381219      | heterogeneous nuclear ribonucleoprotein U-like 1 (predicted)                      | Hnrpul1_predicted    | 1.150 | 0.695 | 0.916  | 0.850 | 1.105  | 0.274 | 1.334  | 0.416 |
| 1386897_at    | NM_024363     | heterogeneous nuclear ribonucleoproteins methyltransferase-like 2 (S. cerevisiae) | Hrmt112              | 0.707 | 0.474 | 2.144  | 0.011 | 0.665  | 0.038 | 1.756  | 0.002 |
| 1374732_at    | BI275803      | hexamethylene bis-acetamide inducible 2 (predicted)                               | Hexim2_predicted     | 0.554 | 0.429 | 0.368  | 0.235 | 0.983  | 0.904 | 0.519  | 0.167 |
| AFFX_Rat_Hexo | AFFX_Rat_Hexo | hexokinase 1                                                                      | Hk1                  | 1.000 | 0.446 | 0.997  | 0.336 | 1.004  | 0.709 | 1.000  | 0.895 |
| AFFX_Rat_Hexo | AFFX_Rat_Hexo | hexokinase 1                                                                      | Hk1                  | 0.999 | 0.451 | 0.997  | 0.194 | 1.002  | 0.611 | 0.998  | 0.231 |
| AFFX_Rat_Hexo | AFFX_Rat_Hexo | hexokinase 1                                                                      | Hk1                  | 1.002 | 0.451 | 0.996  | 0.270 | 1.009  | 0.967 | 0.999  | 0.734 |
| 1383519_at    | BI294137      | Hexokinase 2                                                                      | Hk2                  | 4.988 | 0.011 | 16.768 | 0.002 | 17.219 | 0.011 | 20.434 | 0.001 |
| 1373222_at    | AI230271      | hexosaminidase A                                                                  | Hexa                 | 0.777 | 0.253 | 0.610  | 0.001 | 1.055  | 0.631 | 0.611  | 0.003 |
| 1374173_at    | AA799841      | Hexosaminidase B                                                                  | Hexb                 | 0.634 | 0.028 | 0.650  | 0.009 | 1.037  | 0.747 | 0.824  | 0.016 |
| 1372706_at    | AA892845      | hexosaminidase B                                                                  | Hexb                 | 0.699 | 0.460 | 1.082  | 0.453 | 0.624  | 0.238 | 0.901  | 0.338 |
| 1398933_at    | AA894259      | HIG1 domain family, member 2A (predicted)                                         | Higd2a_predicted     | 0.764 | 0.809 | 0.940  | 0.690 | 0.519  | 0.026 | 0.951  | 0.711 |



|              |           |                                                                                                                                                                                                                              |                                                                                           |       |       |       |       |       |       |       |       |
|--------------|-----------|------------------------------------------------------------------------------------------------------------------------------------------------------------------------------------------------------------------------------|-------------------------------------------------------------------------------------------|-------|-------|-------|-------|-------|-------|-------|-------|
| 1398859_at   | U90725    | high density lipoprotein binding protein                                                                                                                                                                                     | Hdlbp                                                                                     | 0.644 | 0.507 | 1.167 | 0.232 | 0.806 | 0.189 | 1.020 | 0.596 |
| 1375309_at   | BI296631  | High density lipoprotein binding protein                                                                                                                                                                                     | Hdlbp                                                                                     | 1.019 | 0.806 | 1.096 | 0.718 | 1.499 | 0.108 | 0.990 | 0.939 |
| 1372494_a_at | BM384171  | high mobility group 20 B (predicted)                                                                                                                                                                                         | Hmg20b_predicted                                                                          | 1.004 | 0.865 | 1.001 | 0.991 | 1.109 | 0.728 | 1.000 | 0.991 |
| 1388309_at   | BG378885  | high mobility group AT-hook 1                                                                                                                                                                                                | Hmgal                                                                                     | 1.277 | 0.189 | 2.387 | 0.020 | 1.705 | 0.035 | 2.783 | 0.037 |
| 1388783_at   | BE107162  | high mobility group box 1                                                                                                                                                                                                    | Hmgb1                                                                                     | 0.898 | 0.051 | 0.947 | 0.064 | 0.670 | 0.050 | 0.894 | 0.339 |
| 1368042_a_at | AF275734  | high mobility group box 1 /// similar to High mobility group protein 1 (HMG-1) (predicted) /// similar to Hmgb1 protein (predicted) /// similar to High mobility group protein 1 (HMG-1) (predicted)                         | Hmgb1 ///<br>RGD1562312_predicted ///<br>RGD1563786_predicted ///<br>RGD1563012_predicted | 1.042 | 0.860 | 1.119 | 0.648 | 1.026 | 0.162 | 1.043 | 0.296 |
| 1367676_at   | NM_017187 | high mobility group box 2 /// similar to High mobility group protein 2 (HMG-2) (predicted) /// similar to High mobility group protein 2 (HMG-2) (predicted) /// similar to High mobility group protein 2 (HMG-2) (predicted) | Hmgb2 ///<br>RGD1564519_predicted ///<br>RGD1561694_predicted ///<br>RGD1559962_predicted | 1.599 | 0.239 | 2.112 | 0.165 | 1.337 | 0.163 | 1.551 | 0.454 |
| 1368549_at   | NM_013221 | high mobility group box transcription factor 1                                                                                                                                                                               | Hbp1                                                                                      | 0.649 | 0.840 | 1.788 | 0.052 | 1.310 | 0.462 | 0.935 | 0.818 |
| 1388314_at   | BF281178  | high mobility group nucleosomal binding domain 1                                                                                                                                                                             | Hmgn1                                                                                     | 0.699 | 0.013 | 1.803 | 0.003 | 0.441 | 0.002 | 1.562 | 0.005 |
| 1371352_at   | BM391736  | high mobility group nucleosomal binding domain 2                                                                                                                                                                             | Hmgn2                                                                                     | 0.669 | 0.002 | 1.134 | 0.124 | 0.663 | 0.003 | 1.219 | 0.006 |
| 1371989_at   | BM386357  | high mobility group nucleosomal binding domain 3                                                                                                                                                                             | Hmgn3                                                                                     | 0.753 | 0.162 | 0.461 | 0.001 | 0.900 | 0.795 | 0.590 | 0.009 |
| 1372179_at   | BM389406  | hippocalcin-like 1                                                                                                                                                                                                           | Hpcal1                                                                                    | 1.179 | 0.544 | 0.691 | 0.094 | 1.594 | 0.064 | 0.961 | 0.641 |
| 1374423_at   | BE115866  | hippocampus abundant gene transcript 1 (predicted)                                                                                                                                                                           | Hiat1_predicted                                                                           | 0.718 | 0.127 | 0.812 | 0.103 | 0.637 | 0.020 | 0.869 | 0.131 |
| 1370520_at   | AF260582  | hippyragranin                                                                                                                                                                                                                | LOC257650                                                                                 | 0.945 | 0.434 | 0.577 | 0.023 | 0.941 | 0.733 | 0.705 | 0.289 |
| 1397362_at   | AI071343  | Hippyragranin                                                                                                                                                                                                                | LOC257650                                                                                 | 1.291 | 0.963 | 0.887 | 0.208 | 1.234 | 0.452 | 0.931 | 0.486 |
| 1371813_at   | BI275598  | HIRA interacting protein 3                                                                                                                                                                                                   | Hirip3                                                                                    | 0.370 | 0.038 | 0.716 | 0.185 | 0.353 | 0.048 | 0.796 | 0.487 |
| 1398932_at   | AI227884  | histidine triad nucleotide binding protein 1 (predicted)                                                                                                                                                                     | Hint1_predicted                                                                           | 0.769 | 0.588 | 0.856 | 0.196 | 0.733 | 0.013 | 0.991 | 0.584 |
| 1379395_a_at | BI280018  | histidine triad nucleotide binding protein 2 (predicted)                                                                                                                                                                     | Hint2_predicted                                                                           | 0.561 | 0.432 | 0.553 | 0.010 | 0.537 | 0.000 | 0.597 | 0.098 |
| 1376094_at   | AA925490  | histidine triad nucleotide binding protein 3                                                                                                                                                                                 | Hint3                                                                                     | 0.784 | 0.202 | 0.411 | 0.021 | 0.771 | 0.161 | 0.577 | 0.046 |
| 1388428_at   | BF283222  | histidyl tRNA synthetase 2 (predicted)                                                                                                                                                                                       | Hars2_predicted                                                                           | 0.664 | 0.052 | 1.367 | 0.049 | 0.672 | 0.032 | 0.989 | 0.722 |
| 1397548_at   | BF417363  | histocompatibility (minor) HA-1 (predicted)                                                                                                                                                                                  | Hmha1_predicted                                                                           | 0.998 | 0.973 | 1.001 | 0.603 | 0.999 | 0.980 | 1.001 | 0.462 |
| 1377578_at   | AI072161  | Histocompatibility 13 (predicted)                                                                                                                                                                                            | H13_predicted                                                                             | 0.706 | 0.090 | 0.557 | 0.004 | 1.024 | 0.891 | 0.612 | 0.041 |
| 1378250_at   | BE104756  | Histocompatibility 13 (predicted)                                                                                                                                                                                            | H13_predicted                                                                             | 0.740 | 0.185 | 0.649 | 0.053 | 0.976 | 0.267 | 0.576 | 0.049 |
| 1375334_at   | AW533673  | Histocompatibility 13 (predicted)                                                                                                                                                                                            | H13_predicted                                                                             | 0.893 | 0.570 | 1.178 | 0.615 | 1.224 | 0.085 | 1.042 | 0.502 |
| 1390021_at   | BM391206  | histone 1, H2bh                                                                                                                                                                                                              | Hist1h2bh                                                                                 | 0.729 | 0.583 | 1.283 | 0.883 | 0.393 | 0.984 | 1.564 | 0.206 |
| 1371332_at   | AA848821  | Histone 1, H4a (predicted)                                                                                                                                                                                                   | Hist1h4a_predicted                                                                        | 1.014 | 0.218 | 1.015 | 0.324 | 0.467 | 0.009 | 1.182 | 0.237 |
| 1371959_at   | AI235236  | histone 2, H2aa (predicted) /// similar to Hist2h2aa1 protein (predicted)                                                                                                                                                    | Hist2h2aa_predicted ///<br>RGD1566374_predicted                                           | 0.691 | 0.946 | 0.778 | 0.430 | 0.403 | 0.008 | 0.435 | 0.215 |
| 1384367_at   | AI715140  | histone 2, H3c2 (predicted) /// similar to histone protein Hist2h3c1 (predicted)                                                                                                                                             | Hist2h3c2_predicted ///<br>RGD1563516_predicted                                           | 0.346 | 0.029 | 0.990 | 0.941 | 0.346 | 0.029 | 0.993 | 0.963 |
| 1371765_at   | AA850895  | histone 2a                                                                                                                                                                                                                   | H2a                                                                                       | 0.508 | 0.018 | 0.580 | 0.031 | 0.392 | 0.010 | 0.698 | 0.243 |
| 1381208_at   | BE104595  | histone 2a                                                                                                                                                                                                                   | H2a                                                                                       | 0.748 | 0.145 | 0.653 | 0.178 | 0.413 | 0.001 | 1.416 | 0.685 |
| 1393647_at   | BI285581  | histone aminotransferase 1                                                                                                                                                                                                   | Hat1                                                                                      | 0.539 | 0.034 | 1.504 | 0.184 | 0.610 | 0.080 | 1.599 | 0.481 |
| 1389162_at   | BI277328  | histone cell cycle regulation defective interacting protein 5 (predicted)                                                                                                                                                    | Hirip5_predicted                                                                          | 1.022 | 0.664 | 3.203 | 0.005 | 1.118 | 0.104 | 2.610 | 0.001 |
| 1388761_at   | AI180339  | histone deacetylase 1 (predicted)                                                                                                                                                                                            | Hdac1_predicted                                                                           | 0.588 | 0.014 | 0.338 | 0.000 | 0.717 | 0.047 | 0.562 | 0.006 |
| 1396820_at   | AW530195  | histone deacetylase 1 (predicted)                                                                                                                                                                                            | Hdac1_predicted                                                                           | 0.966 | 0.929 | 0.539 | 0.003 | 0.988 | 0.948 | 0.559 | 0.004 |
| 1390700_s_at | BG378690  | histone deacetylase 10                                                                                                                                                                                                       | Hdac10                                                                                    | 0.999 | 0.802 | 0.999 | 0.992 | 1.002 | 0.815 | 1.009 | 0.790 |
| 1370908_at   | AA892297  | histone deacetylase 2                                                                                                                                                                                                        | Hdac2                                                                                     | 0.610 | 0.001 | 0.732 | 0.023 | 0.966 | 0.420 | 0.823 | 0.001 |
| 1369060_a_at | NM_053448 | histone deacetylase 3                                                                                                                                                                                                        | Hdac3                                                                                     | 0.606 | 0.328 | 0.543 | 0.001 | 0.677 | 0.001 | 0.510 | 0.026 |
| 1376761_at   | BF419085  | histone deacetylase 4 (predicted)                                                                                                                                                                                            | Hdac4_predicted                                                                           | 0.936 | 0.293 | 0.833 | 0.300 | 0.750 | 0.144 | 0.927 | 0.178 |
| 1371819_at   | BF403027  | histone deacetylase 5                                                                                                                                                                                                        | Hdac5                                                                                     | 0.726 | 0.191 | 1.025 | 0.291 | 0.570 | 0.087 | 0.913 | 0.719 |
| 1372592_at   | AI411391  | histone deacetylase 6                                                                                                                                                                                                        | Hdac6                                                                                     | 0.461 | 0.005 | 0.582 | 0.028 | 0.357 | 0.012 | 0.528 | 0.004 |
| 1378634_at   | BE117008  | histone deacetylase 8 (predicted)                                                                                                                                                                                            | Hdac8_predicted                                                                           | 0.592 | 0.040 | 1.059 | 0.391 | 0.833 | 0.256 | 1.005 | 0.245 |
| 1384652_at   | AI555485  | HIV TAT specific factor 1 (predicted)                                                                                                                                                                                        | Htatsf1_predicted                                                                         | 0.677 | 0.044 | 0.982 | 0.139 | 0.766 | 0.146 | 1.288 | 0.052 |
| 1390803_at   | BE117639  | HIV TAT specific factor 1 (predicted)                                                                                                                                                                                        | Htatsf1_predicted                                                                         | 0.525 | 0.214 | 1.398 | 0.023 | 0.399 | 0.032 | 0.857 | 0.065 |
| 1377400_at   | BF391890  | HIV-1 Rev binding protein 2 (predicted)                                                                                                                                                                                      | Hrb2_predicted                                                                            | 0.873 | 0.540 | 2.769 | 0.046 | 1.031 | 0.948 | 2.705 | 0.086 |
| 1397370_at   | AI548338  | HIV-1 Rev binding protein-like (predicted)                                                                                                                                                                                   | Hrb1_predicted                                                                            | 3.460 | 0.039 | 1.049 | 0.938 | 1.706 | 0.052 | 0.999 | 0.996 |
| 1390208_at   | BG378579  | HIV-1 tat interactive protein 2, homolog (human) (predicted)                                                                                                                                                                 | Htatip2_predicted                                                                         | 0.434 | 0.188 | 0.709 | 0.014 | 0.338 | 0.004 | 1.099 | 0.395 |
| 1375154_at   | BI291268  | HIV-1 tat interactive protein, homolog (human)                                                                                                                                                                               | Htatip                                                                                    | 1.401 | 0.362 | 1.006 | 0.765 | 1.211 | 0.190 | 1.002 | 0.148 |
| 1372366_at   | BI285597  | HIV-1 tat interactive protein, homolog (human)                                                                                                                                                                               | Htatip                                                                                    | 0.963 | 0.697 | 1.628 | 0.038 | 1.188 | 0.209 | 1.277 | 0.526 |
| 1388536_at   | BM391608  | HLA-B associated transcript 2                                                                                                                                                                                                | Bat2                                                                                      | 0.694 | 0.402 | 0.874 | 0.592 | 0.488 | 0.254 | 1.135 | 0.013 |
| 1371985_a_at | BE097389  | HLA-B associated transcript 5                                                                                                                                                                                                | Bat5                                                                                      | 1.479 | 0.008 | 1.655 | 0.000 | 1.786 | 0.013 | 2.067 | 0.029 |
| 1388158_at   | BG057565  | HLA-B-associated transcript 1A                                                                                                                                                                                               | Bat1a                                                                                     | 1.478 | 0.571 | 1.843 | 0.000 | 1.240 | 0.889 | 1.663 | 0.000 |
| 1387175_a_at | NM_053609 | HLA-B-associated transcript 3                                                                                                                                                                                                | Bat3                                                                                      | 0.730 | 0.515 | 1.226 | 0.200 | 0.639 | 0.007 | 0.994 | 0.813 |
| 1372118_at   | BI281674  | HMP19 protein                                                                                                                                                                                                                | MGC125201                                                                                 | 0.369 | 0.279 | 0.241 | 0.018 | 0.441 | 0.016 | 0.293 | 0.018 |

|              |           |                                                                                                                                       |                  |        |       |       |       |        |       |        |       |
|--------------|-----------|---------------------------------------------------------------------------------------------------------------------------------------|------------------|--------|-------|-------|-------|--------|-------|--------|-------|
| 1388363_at   | BM389226  | hnRNP-associated with lethal yellow                                                                                                   | Raly             | 0.630  | 0.954 | 1.440 | 0.020 | 0.740  | 0.570 | 1.128  | 0.921 |
| 1390408_at   | BF405032  | holocytochrome c synthetase (predicted)                                                                                               | Hccs_predicted   | 0.593  | 0.437 | 1.198 | 0.481 | 0.713  | 0.081 | 1.216  | 0.612 |
| 1380442_at   | AI235507  | homeo box C8 (mapped)                                                                                                                 | Hoxc8_mapped     | 0.774  | 0.358 | 2.121 | 0.443 | 1.456  | 0.401 | 1.424  | 0.836 |
| 1385837_at   | AA956624  | homeo box D3 (mapped)                                                                                                                 | Hoxd3_mapped     | 0.875  | 0.600 | 0.849 | 0.946 | 0.695  | 0.614 | 0.939  | 0.977 |
| 1367816_at   | NM_133621 | homeobox only domain                                                                                                                  | Hod              | 1.035  | 0.684 | 2.052 | 0.156 | 7.093  | 0.013 | 10.509 | 0.008 |
| 1376692_at   | BM392321  | homeodomain interacting protein kinase 2 (predicted)                                                                                  | Hipk2_predicted  | 1.564  | 0.168 | 1.742 | 0.170 | 1.657  | 0.505 | 1.976  | 0.101 |
| 1369352_at   | NM_031787 | homeodomain interacting protein kinase 3                                                                                              | Hipk3            | 1.047  | 0.129 | 2.476 | 0.025 | 1.053  | 0.564 | 1.002  | 0.538 |
| 1399163_a_at | BM388880  | homer homolog 1 (Drosophila)                                                                                                          | Homer1           | 0.799  | 0.098 | 0.763 | 0.027 | 0.550  | 0.011 | 0.779  | 0.046 |
| 1370454_at   | AB003726  | homer homolog 1 (Drosophila)                                                                                                          | Homer1           | 0.731  | 0.101 | 0.908 | 0.460 | 0.891  | 0.788 | 0.803  | 0.138 |
| 1385757_at   | BF397258  | Homer homolog 1 (Drosophila)                                                                                                          | Homer1           | 1.049  | 0.965 | 0.837 | 0.489 | 2.913  | 0.022 | 0.895  | 0.767 |
| 1385573_at   | AI070797  | Homer homolog 3 (Drosophila)                                                                                                          | Homer3           | 1.002  | 0.589 | 1.281 | 0.233 | 1.001  | 0.147 | 1.195  | 0.094 |
| 1370212_at   | AW253366  | homer homolog 3 (Drosophila)                                                                                                          | Homer3           | 1.005  | 0.629 | 0.998 | 0.136 | 1.006  | 0.023 | 1.004  | 0.990 |
| 1367741_at   | NM_053523 | homocysteine-inducible, endoplasmic reticulum stress-inducible, ubiquitin-like domain member 1                                        | Herpud1          | 1.103  | 0.299 | 2.287 | 0.000 | 1.069  | 0.352 | 1.878  | 0.010 |
| 1371609_at   | AI232270  | homolog of zebrafish ES1                                                                                                              | RGD1303003       | 0.448  | 0.140 | 0.956 | 0.766 | 0.479  | 0.018 | 0.980  | 0.909 |
| 1386689_at   | BF563120  | hook homolog 2 (Drosophila)                                                                                                           | Hook2            | 0.992  | 0.995 | 1.071 | 0.350 | 1.001  | 0.955 | 1.037  | 0.307 |
| 1373126_at   | AW918188  | Hook homolog 3 (Drosophila)                                                                                                           | Hook3            | 0.478  | 0.023 | 0.588 | 0.131 | 0.260  | 0.025 | 0.706  | 0.700 |
| 1385931_at   | AW535564  | hook homolog 3 (Drosophila)                                                                                                           | Hook3            | 0.504  | 0.055 | 0.970 | 0.763 | 0.319  | 0.109 | 0.772  | 0.261 |
| 1380824_at   | AI501458  | Hook homolog 3 (Drosophila)                                                                                                           | Hook3            | 0.666  | 0.150 | 0.886 | 0.508 | 0.663  | 0.003 | 0.879  | 0.474 |
| 1389384_at   | BE111733  | hormone-regulated proliferation associated protein 20                                                                                 | Hrap20           | 1.289  | 0.222 | 3.200 | 0.007 | 1.473  | 0.025 | 4.073  | 0.002 |
| 1371510_at   | AA944494  | host cell factor C1 regulator 1 (XPO1-dependent)                                                                                      | Hcfc1r1          | 0.678  | 0.474 | 1.195 | 0.072 | 0.695  | 0.016 | 0.933  | 0.342 |
| 1392089_at   | AW435314  | host cell factor C2                                                                                                                   | Hcfc2            | 0.653  | 0.026 | 0.438 | 0.036 | 0.787  | 0.032 | 0.339  | 0.037 |
| 1383125_at   | AW525401  | HpaII tiny fragments locus 9c                                                                                                         | Htf9c            | 0.614  | 0.053 | 1.763 | 0.052 | 0.379  | 0.107 | 0.999  | 0.991 |
| 1370202_at   | BG378637  | HRAS like suppressor 3                                                                                                                | Hrasls3          | 17.671 | 0.020 | 7.711 | 0.028 | 39.971 | 0.002 | 52.873 | 0.003 |
| 1370316_at   | AF187860  | hsp70-interacting protein                                                                                                             | Hspbp1           | 0.776  | 0.258 | 1.351 | 0.026 | 0.435  | 0.012 | 1.309  | 0.075 |
| 1368195_at   | NM_134419 | Hspb associated protein 1                                                                                                             | Hspbap1          | 0.811  | 0.236 | 3.886 | 0.005 | 1.001  | 0.254 | 2.225  | 0.026 |
| 1368546_at   | NM_024137 | human immunodeficiency virus type I enhancer binding protein 2                                                                        | Hivep2           | 4.159  | 0.040 | 1.227 | 0.024 | 3.257  | 0.037 | 1.161  | 0.381 |
| 1389132_at   | AW253339  | Huntingtin interacting protein 1                                                                                                      | Hip1             | 0.642  | 0.018 | 0.386 | 0.030 | 0.941  | 0.844 | 0.676  | 0.020 |
| 1370994_at   | BG381386  | huntingtin interacting protein 1 related                                                                                              | Hip1r            | 1.017  | 0.272 | 1.013 | 0.833 | 0.721  | 0.101 | 0.678  | 0.002 |
| 1383820_at   | AI072624  | Huntingtin interacting protein 1 related                                                                                              | Hip1r            | 0.871  | 0.608 | 0.707 | 0.153 | 0.779  | 0.473 | 0.836  | 0.543 |
| 1378581_at   | BI295536  | huntingtin interacting protein 1 related                                                                                              | Hip1r            | 1.061  | 0.666 | 0.903 | 0.463 | 1.042  | 0.360 | 0.705  | 0.082 |
| 1385259_at   | AI112792  | huntingtin interacting protein 2 (predicted)                                                                                          | Hip2_predicted   | 1.213  | 0.512 | 0.834 | 0.175 | 1.312  | 0.802 | 0.763  | 0.109 |
| 1373063_at   | BI277000  | huntingtin interacting protein 2 (predicted)                                                                                          | Hip2_predicted   | 0.856  | 0.673 | 1.479 | 0.007 | 0.718  | 0.005 | 1.177  | 0.282 |
| 1369358_a_at | AI412750  | huntingtin-associated protein 1                                                                                                       | Hap1             | 0.337  | 0.071 | 0.136 | 0.000 | 0.675  | 0.123 | 0.210  | 0.012 |
| 1370395_at   | U18650    | Huntington disease gene homolog                                                                                                       | Hdh              | 1.344  | 0.006 | 1.569 | 0.096 | 1.584  | 0.001 | 1.222  | 0.033 |
| 1378614_at   | BI274329  | Huntington disease gene homolog                                                                                                       | Hdh              | 1.395  | 0.265 | 2.124 | 0.105 | 1.417  | 0.023 | 1.539  | 0.039 |
| 1386514_at   | AA819731  | Hyaluronan and proteoglycan link protein 4 (predicted)                                                                                | Hapln4_predicted | 0.952  | 0.333 | 0.418 | 0.052 | 1.226  | 0.505 | 0.412  | 0.075 |
| 1370462_at   | AI171185  | hyaluronan mediated motility receptor (RHAMM)                                                                                         | Hmmr             | 1.394  | 0.040 | 1.074 | 0.167 | 1.207  | 0.991 | 0.997  | 0.960 |
| 1389665_at   | BG375619  | hyaluronic acid binding protein 4 (predicted)                                                                                         | Habp4_predicted  | 0.296  | 0.003 | 0.760 | 0.039 | 0.294  | 0.002 | 0.659  | 0.094 |
| 1370370_at   | AF034218  | hyaluronoglucosaminidase 2                                                                                                            | Hyal2            | 0.874  | 0.142 | 1.019 | 0.016 | 0.871  | 0.147 | 1.009  | 0.973 |
| 1396480_at   | BG372249  | Hyaluronoglucosaminidase 3                                                                                                            | Hyal3            | 0.863  | 0.190 | 0.913 | 0.066 | 1.039  | 0.728 | 1.045  | 0.907 |
| 1369986_at   | NM_033349 | hydroxyacyl glutathione hydrolase                                                                                                     | Hagh             | 0.465  | 0.423 | 0.370 | 0.002 | 0.465  | 0.049 | 0.297  | 0.004 |
| 1367662_at   | NM_031682 | hydroxyacyl-Coenzyme A dehydrogenase type II                                                                                          | Hadh2            | 0.422  | 0.299 | 0.844 | 0.935 | 0.368  | 0.131 | 0.724  | 0.275 |
| 1370164_at   | AA800240  | hydroxyacyl-Coenzyme A dehydrogenase/3-ketoacyl-Coenzyme A thiolase/enoyl-Coenzyme A hydratase (trifunctional protein), alpha subunit | Hadha            | 1.377  | 0.262 | 1.078 | 0.299 | 1.943  | 0.024 | 1.361  | 0.012 |
| 1367694_at   | NM_133618 | hydroxyacyl-Coenzyme A dehydrogenase/3-ketoacyl-Coenzyme A thiolase/enoyl-Coenzyme A hydratase (trifunctional protein), beta subunit  | Hadhb            | 0.904  | 0.676 | 1.393 | 0.005 | 1.031  | 0.385 | 1.375  | 0.007 |
| 1370433_at   | AB000199  | hydroxy-delta-5-steroid dehydrogenase, 3 beta- and steroid delta-isomerase 7                                                          | Hsd3b7           | 0.712  | 0.180 | 0.872 | 0.231 | 0.589  | 0.075 | 1.276  | 0.398 |
| 1386983_at   | NM_013168 | hydroxymethylbilane synthase                                                                                                          | Hmbs             | 0.236  | 0.225 | 0.765 | 0.116 | 0.208  | 0.016 | 0.679  | 0.005 |
| 1376191_at   | AA848820  | hydroxyprostaglandin dehydrogenase 15 (NAD)                                                                                           | Hpgd             | 0.207  | 0.071 | 0.286 | 0.002 | 0.287  | 0.003 | 0.255  | 0.009 |
| 1387631_at   | NM_024390 | hydroxyprostaglandin dehydrogenase 15 (NAD)                                                                                           | Hpgd             | 0.420  | 0.343 | 0.080 | 0.006 | 0.992  | 0.318 | 0.095  | 0.000 |
| 1368051_at   | NM_032066 | hydroxysteroid (17-beta) dehydrogenase 12                                                                                             | Hsd17b12         | 0.632  | 0.181 | 0.721 | 0.003 | 0.819  | 0.475 | 0.747  | 0.004 |
| 1367672_at   | NM_024392 | hydroxysteroid (17-beta) dehydrogenase 4                                                                                              | Hsd17b4          | 0.291  | 0.123 | 0.190 | 0.003 | 0.478  | 0.001 | 0.312  | 0.032 |
| 1382492_a_at | AA866404  | hydroxysteroid (17-beta) dehydrogenase 8                                                                                              | Hsd17b8          | 0.964  | 0.320 | 1.033 | 0.556 | 0.614  | 0.143 | 0.945  | 0.413 |
| 1379447_at   | AW526204  | hyperpolarization-activated cyclic nucleotide-gated potassium channel 3                                                               | Hcn3             | 0.846  | 0.082 | 1.592 | 0.070 | 0.545  | 0.160 | 1.482  | 0.004 |
| 1372087_at   | BG666916  | hypertrophic agonist responsive protein B64                                                                                           | Harpb64          | 1.480  | 0.470 | 0.877 | 0.274 | 1.850  | 0.021 | 1.434  | 0.035 |
| 1373671_at   | AA944790  | Hypothetical gene LOC554364                                                                                                           | LOC554364        | 0.832  | 0.813 | 0.417 | 0.003 | 1.490  | 0.214 | 0.526  | 0.091 |
| 1372809_at   | AI716200  | hypothetical gene supported by AF152002                                                                                               | LOC290595        | 3.658  | 0.119 | 2.336 | 0.037 | 3.159  | 0.027 | 1.300  | 0.520 |
| 1368138_at   | BI281170  | hypothetical gene supported by NM_017212                                                                                              | LOC497674        | 0.538  | 0.040 | 0.910 | 0.069 | 0.689  | 0.087 | 0.670  | 0.030 |
| 1367778_at   | NM_019331 | hypothetical gene supported by NM_019331                                                                                              | LOC497733        | 0.804  | 0.070 | 0.666 | 0.002 | 0.508  | 0.000 | 0.567  | 0.000 |
| 1368174_at   | NM_019371 | hypothetical gene supported by NM_019371                                                                                              | LOC497816        | 1.035  | 0.718 | 3.909 | 0.010 | 0.687  | 0.951 | 2.891  | 0.063 |
| 1387000_at   | NM_019385 | hypothetical gene supported by NM_019385                                                                                              | LOC497835        | 0.717  | 0.107 | 1.624 | 0.015 | 0.884  | 0.229 | 1.149  | 0.421 |

|              |           |                                                                                                                                                                    |                                                                              |        |       |        |       |        |       |        |       |
|--------------|-----------|--------------------------------------------------------------------------------------------------------------------------------------------------------------------|------------------------------------------------------------------------------|--------|-------|--------|-------|--------|-------|--------|-------|
| 1367853_at   | NM_031798 | hypothetical gene supported by NM_031798                                                                                                                           | LOC497723                                                                    | 0.345  | 0.000 | 0.287  | 0.001 | 0.353  | 0.016 | 0.398  | 0.033 |
| 1382264_at   | AI714243  | hypothetical gene supported by NM_133381                                                                                                                           | LOC497663                                                                    | 1.288  | 0.080 | 0.981  | 0.806 | 1.106  | 0.527 | 0.870  | 0.096 |
| 1393663_at   | BI274126  | hypothetical gene supported by NM_139339                                                                                                                           | LOC497667                                                                    | 1.279  | 0.928 | 0.725  | 0.365 | 1.051  | 0.846 | 1.399  | 0.379 |
| 1370517_at   | U18772    | hypothetical gene supported by NM_153735                                                                                                                           | LOC497675                                                                    | 0.095  | 0.014 | 0.095  | 0.008 | 0.118  | 0.007 | 0.086  | 0.049 |
| 1383768_at   | BF563441  | hypothetical gene supported by NM_173309                                                                                                                           | LOC497806                                                                    | 1.029  | 0.069 | 1.508  | 0.040 | 1.455  | 0.153 | 1.327  | 0.028 |
| 1372099_at   | BI303661  | hypothetical gene supported by NM_199207                                                                                                                           | LOC497793                                                                    | 0.890  | 0.552 | 1.782  | 0.036 | 0.939  | 0.192 | 1.352  | 0.200 |
| 1370872_at   | BF288095  | hypothetical gene supported by Y16641 (predicted) /// similar to Hnrpa3 protein (predicted) /// similar to Hnrpa3 protein (predicted)                              | RGD1564920_predicted ///<br>RGD1562688_predicted ///<br>RGD1563768_predicted | 0.932  | 0.806 | 1.490  | 0.009 | 0.770  | 0.271 | 1.136  | 0.023 |
| 1370871_at   | BM384165  | hypothetical gene supported by Y16641; Y16641 (predicted)                                                                                                          | RGD1561108_predicted                                                         | 1.098  | 0.923 | 1.014  | 0.070 | 0.994  | 0.798 | 0.818  | 0.113 |
| 1374853_at   | AI137833  | hypothetical LOC287173                                                                                                                                             | RGD1305622                                                                   | 1.220  | 0.287 | 2.331  | 0.010 | 1.065  | 0.589 | 1.917  | 0.006 |
| 1390503_at   | BI301268  | Hypothetical LOC287306 (predicted)                                                                                                                                 | RGD1307036_predicted                                                         | 1.363  | 0.136 | 1.110  | 0.109 | 1.009  | 0.870 | 1.030  | 0.529 |
| 1389203_at   | BM387541  | Hypothetical LOC287306 (predicted)                                                                                                                                 | RGD1307036_predicted                                                         | 1.011  | 0.373 | 0.821  | 0.450 | 1.025  | 0.888 | 0.693  | 0.488 |
| 1376912_at   | BI290097  | hypothetical LOC287388 (predicted)                                                                                                                                 | RGD1310324_predicted                                                         | 0.716  | 0.049 | 0.758  | 0.337 | 0.729  | 0.057 | 0.672  | 0.498 |
| 1377940_at   | BF398271  | hypothetical LOC287534                                                                                                                                             | RGD1359691                                                                   | 1.041  | 0.923 | 1.002  | 0.991 | 1.105  | 0.821 | 0.999  | 0.997 |
| 1375425_at   | BF395126  | hypothetical LOC287541 (predicted)                                                                                                                                 | RGD1309400_predicted                                                         | 0.678  | 0.244 | 1.398  | 0.084 | 0.681  | 0.087 | 1.130  | 0.334 |
| 1374991_at   | BE107630  | hypothetical LOC287938                                                                                                                                             | LOC287938                                                                    | 0.561  | 0.043 | 0.998  | 0.977 | 0.567  | 0.040 | 0.999  | 0.997 |
| 1397378_at   | BE115240  | Hypothetical LOC288354 (predicted)                                                                                                                                 | RGD1308321_predicted                                                         | 0.847  | 0.409 | 1.013  | 0.794 | 0.790  | 0.217 | 0.879  | 0.213 |
| 1393030_at   | BE115641  | hypothetical LOC291900 /// similar to spermatogenesis associated glutamate (E)-rich protein 4d /// hypothetical LOC317026 /// hypothetical LOC363325 /// LOC501316 | LOC291900 /// LOC301986<br>/// LOC317026 ///<br>LOC363325 /// LOC501316      | 0.598  | 0.056 | 0.349  | 0.006 | 0.491  | 0.038 | 0.335  | 0.058 |
| 1389338_at   | AA875518  | hypothetical LOC293114 (predicted)                                                                                                                                 | RGD1308371_predicted                                                         | 1.011  | 0.785 | 1.397  | 0.177 | 1.081  | 0.907 | 1.367  | 0.135 |
| 1399001_at   | BI285943  | hypothetical LOC294030                                                                                                                                             | RGD1305481                                                                   | 0.890  | 0.597 | 1.236  | 0.029 | 0.973  | 0.266 | 1.300  | 0.077 |
| 1373136_at   | AI013609  | hypothetical LOC294390                                                                                                                                             | RGD1307672                                                                   | 2.338  | 0.028 | 1.495  | 0.018 | 3.065  | 0.007 | 1.767  | 0.001 |
| 1374090_at   | BI296363  | hypothetical LOC295216 /// similar to DKFZP547E1010 protein                                                                                                        | LOC295216 /// LOC361990                                                      | 0.789  | 0.561 | 0.852  | 0.613 | 1.153  | 0.239 | 0.710  | 0.793 |
| 1384411_at   | AA962968  | Hypothetical LOC296884                                                                                                                                             | LOC296884                                                                    | 1.239  | 0.949 | 0.863  | 0.116 | 1.115  | 0.815 | 0.816  | 0.892 |
| 1382218_at   | AI012175  | hypothetical LOC298077                                                                                                                                             | RGD1305807                                                                   | 1.970  | 0.110 | 3.914  | 0.018 | 1.597  | 0.094 | 2.661  | 0.079 |
| 1372966_at   | AI178784  | hypothetical LOC298504 (predicted)                                                                                                                                 | RGD1310174_predicted                                                         | 0.373  | 0.001 | 0.535  | 0.077 | 0.579  | 0.005 | 0.575  | 0.127 |
| 1371745_at   | AI179388  | hypothetical LOC300361                                                                                                                                             | RGD1310669                                                                   | 0.602  | 0.806 | 1.249  | 0.074 | 0.451  | 0.339 | 1.131  | 0.559 |
| 1372387_at   | BF416240  | hypothetical LOC300751 (predicted)                                                                                                                                 | RGD1311874_predicted                                                         | 1.387  | 0.811 | 1.139  | 0.319 | 1.001  | 0.911 | 1.011  | 0.995 |
| 1387909_at   | U94904    | hypothetical LOC301448                                                                                                                                             | LOC301448                                                                    | 0.713  | 0.174 | 0.508  | 0.002 | 0.832  | 0.019 | 0.578  | 0.012 |
| 1376072_at   | AI170779  | hypothetical LOC301634 /// similar to RGD1309973_predicted protein                                                                                                 | RGD1309973 ///<br>LOC501188                                                  | 0.997  | 0.682 | 0.553  | 0.010 | 1.922  | 0.602 | 0.590  | 0.085 |
| 1392547_at   | AI716211  | hypothetical LOC302884                                                                                                                                             | MGC105649                                                                    | 85.708 | 0.000 | 21.055 | 0.004 | 47.224 | 0.000 | 19.230 | 0.001 |
| 1377938_at   | AA859585  | hypothetical LOC302941                                                                                                                                             | RGD1359443                                                                   | 1.157  | 0.614 | 3.415  | 0.001 | 0.741  | 0.091 | 2.799  | 0.002 |
| 1375430_at   | BM389077  | hypothetical LOC303211                                                                                                                                             | RGD1311260                                                                   | 0.079  | 0.012 | 1.126  | 0.059 | 0.276  | 0.009 | 1.115  | 0.419 |
| 1385088_at   | AA891356  | hypothetical LOC304650 (predicted)                                                                                                                                 | RGD1310262_predicted                                                         | 0.569  | 0.116 | 0.995  | 0.553 | 0.791  | 0.198 | 1.056  | 0.901 |
| 1382600_at   | AA958022  | Hypothetical LOC305452 (predicted)                                                                                                                                 | RGD1309634_predicted                                                         | 0.527  | 0.301 | 1.212  | 0.979 | 1.073  | 0.048 | 1.803  | 0.280 |
| 1374561_at   | AW523899  | hypothetical LOC305452 (predicted)                                                                                                                                 | RGD1309634_predicted                                                         | 1.220  | 0.341 | 1.456  | 0.415 | 1.086  | 0.747 | 1.252  | 0.897 |
| 1376309_at   | BI296018  | hypothetical LOC305452 (predicted)                                                                                                                                 | RGD1309634_predicted                                                         | 0.991  | 0.678 | 0.649  | 0.130 | 1.059  | 0.579 | 0.626  | 0.007 |
| 1380503_at   | BI290590  | hypothetical LOC305452 (predicted)                                                                                                                                 | RGD1309634_predicted                                                         | 1.037  | 0.726 | 0.970  | 0.836 | 1.002  | 0.932 | 0.810  | 0.128 |
| 1380263_at   | BI290769  | hypothetical LOC305452 (predicted)                                                                                                                                 | RGD1309634_predicted                                                         | 1.133  | 0.821 | 0.869  | 0.452 | 1.091  | 0.905 | 0.863  | 0.294 |
| 1381757_at   | AA965058  | hypothetical LOC305552 (predicted)                                                                                                                                 | RGD1309501_predicted                                                         | 0.553  | 0.007 | 0.803  | 0.194 | 0.579  | 0.013 | 1.092  | 0.194 |
| 1386143_at   | AA799997  | hypothetical LOC305552 (predicted)                                                                                                                                 | RGD1309501_predicted                                                         | 1.049  | 0.915 | 0.730  | 0.130 | 1.257  | 0.909 | 0.817  | 0.786 |
| 1371389_at   | AI170668  | hypothetical LOC306766                                                                                                                                             | LOC306766                                                                    | 0.816  | 0.773 | 0.993  | 0.959 | 0.757  | 0.010 | 1.190  | 0.610 |
| 1398996_at   | AI007987  | hypothetical LOC308765 (predicted)                                                                                                                                 | RGD1311021_predicted                                                         | 0.753  | 0.452 | 0.966  | 0.913 | 0.640  | 0.110 | 1.107  | 0.218 |
| 1375435_at   | AW251686  | hypothetical LOC308765 (predicted)                                                                                                                                 | RGD1311021_predicted                                                         | 0.730  | 0.509 | 1.534  | 0.022 | 0.316  | 0.087 | 0.830  | 0.050 |
| 1384296_at   | AI136388  | hypothetical LOC312654 (predicted)                                                                                                                                 | RGD1311909_predicted                                                         | 1.410  | 0.162 | 0.525  | 0.009 | 0.897  | 0.525 | 0.801  | 0.024 |
| 1383793_at   | BI274808  | hypothetical LOC312654 (predicted)                                                                                                                                 | RGD1311909_predicted                                                         | 1.834  | 0.224 | 2.907  | 0.041 | 1.041  | 0.388 | 2.112  | 0.074 |
| 1396151_at   | AA850797  | hypothetical LOC312654 (predicted)                                                                                                                                 | RGD1311909_predicted                                                         | 0.779  | 0.758 | 0.770  | 0.991 | 1.869  | 0.148 | 0.830  | 0.911 |
| 1384066_at   | AW921699  | hypothetical LOC314168 (predicted)                                                                                                                                 | RGD1307621_predicted                                                         | 1.227  | 0.469 | 1.655  | 0.097 | 0.945  | 0.866 | 1.039  | 0.821 |
| 1379703_at   | BF288207  | hypothetical LOC315055 (predicted)                                                                                                                                 | RGD1311559_predicted                                                         | 2.667  | 0.030 | 1.654  | 0.953 | 4.574  | 0.003 | 1.206  | 0.191 |
| 1390619_at   | AI178473  | Hypothetical LOC315216 (predicted)                                                                                                                                 | RGD1311907_predicted                                                         | 0.806  | 0.096 | 0.905  | 0.111 | 0.825  | 0.230 | 0.905  | 0.179 |
| 1376156_at   | BM391273  | hypothetical LOC316091                                                                                                                                             | RGD1304827                                                                   | 0.343  | 0.013 | 0.434  | 0.001 | 0.332  | 0.004 | 0.412  | 0.050 |
| 1382292_at   | BF285343  | hypothetical LOC361366                                                                                                                                             | LOC361366                                                                    | 1.029  | 0.914 | 1.079  | 0.626 | 1.327  | 0.218 | 0.986  | 0.791 |
| 1388904_at   | AI236597  | hypothetical protein Dd25                                                                                                                                          | Dd25                                                                         | 1.284  | 0.018 | 1.289  | 0.023 | 1.353  | 0.000 | 1.152  | 0.063 |
| 1376524_at   | BG378747  | hypothetical protein Dd25                                                                                                                                          | Dd25                                                                         | 1.198  | 0.061 | 1.904  | 0.094 | 1.053  | 0.345 | 1.496  | 0.083 |
| 1375911_at   | AI171772  | hypothetical protein LK44                                                                                                                                          | RGD735140                                                                    | 1.184  | 0.362 | 3.333  | 0.005 | 1.104  | 0.589 | 2.163  | 0.004 |
| 1393606_at   | AI137411  | hypothetical protein LK44                                                                                                                                          | RGD735140                                                                    | 0.908  | 0.825 | 1.474  | 0.129 | 0.915  | 0.130 | 1.058  | 0.756 |
| 1377214_a_at | BF405050  | hypothetical protein LOC292764                                                                                                                                     | RGD1303117                                                                   | 0.879  | 0.995 | 0.891  | 0.416 | 0.729  | 0.209 | 0.999  | 0.990 |
| 1372217_at   | BM385348  | hypothetical protein LOC303332                                                                                                                                     | LOC303332                                                                    | 0.586  | 0.059 | 1.484  | 0.015 | 0.568  | 0.006 | 1.453  | 0.036 |

|              |          |                                                                                                                                                                                                                                                                                                                                                                                                                                                                                                                                                                                                                                               |                                                                                                                                                                                                                                                                                                                                                             |        |       |       |       |        |       |        |       |
|--------------|----------|-----------------------------------------------------------------------------------------------------------------------------------------------------------------------------------------------------------------------------------------------------------------------------------------------------------------------------------------------------------------------------------------------------------------------------------------------------------------------------------------------------------------------------------------------------------------------------------------------------------------------------------------------|-------------------------------------------------------------------------------------------------------------------------------------------------------------------------------------------------------------------------------------------------------------------------------------------------------------------------------------------------------------|--------|-------|-------|-------|--------|-------|--------|-------|
| 1385268_at   | BI289167 | hypothetical protein LOC304743                                                                                                                                                                                                                                                                                                                                                                                                                                                                                                                                                                                                                | LOC304743                                                                                                                                                                                                                                                                                                                                                   | 1.841  | 0.046 | 3.562 | 0.000 | 2.160  | 0.008 | 2.840  | 0.000 |
| 1385269_s_at | BI289167 | hypothetical protein LOC304743                                                                                                                                                                                                                                                                                                                                                                                                                                                                                                                                                                                                                | LOC304743                                                                                                                                                                                                                                                                                                                                                   | 1.102  | 0.661 | 3.291 | 0.002 | 1.603  | 0.066 | 2.046  | 0.004 |
| 1398988_at   | BE110642 | hypothetical protein LOC307347                                                                                                                                                                                                                                                                                                                                                                                                                                                                                                                                                                                                                | LOC307347                                                                                                                                                                                                                                                                                                                                                   | 0.951  | 0.898 | 0.821 | 0.155 | 0.850  | 0.291 | 0.951  | 0.602 |
| 1378914_a_at | AI059468 | hypothetical protein LOC308990                                                                                                                                                                                                                                                                                                                                                                                                                                                                                                                                                                                                                | LOC308990                                                                                                                                                                                                                                                                                                                                                   | 0.912  | 0.905 | 0.953 | 0.191 | 1.033  | 0.089 | 0.962  | 0.763 |
| 1388817_at   | BI284848 | hypothetical protein LOC310665                                                                                                                                                                                                                                                                                                                                                                                                                                                                                                                                                                                                                | LOC310665                                                                                                                                                                                                                                                                                                                                                   | 0.831  | 0.260 | 1.042 | 0.630 | 0.546  | 0.008 | 0.930  | 0.285 |
| 1388985_at   | AI012869 | hypothetical protein LOC310926 /// LOC501211                                                                                                                                                                                                                                                                                                                                                                                                                                                                                                                                                                                                  | LOC310926 /// LOC501211                                                                                                                                                                                                                                                                                                                                     | 0.574  | 0.051 | 0.772 | 0.507 | 0.604  | 0.565 | 1.017  | 0.947 |
| 1382234_at   | BI286950 | Hypothetical protein LOC311254                                                                                                                                                                                                                                                                                                                                                                                                                                                                                                                                                                                                                | LOC311254                                                                                                                                                                                                                                                                                                                                                   | 0.693  | 0.117 | 0.833 | 0.035 | 0.820  | 0.508 | 0.995  | 0.236 |
| 1398429_at   | AA893184 | hypothetical protein LOC311254                                                                                                                                                                                                                                                                                                                                                                                                                                                                                                                                                                                                                | LOC311254                                                                                                                                                                                                                                                                                                                                                   | 1.142  | 0.492 | 2.851 | 0.003 | 1.093  | 0.684 | 2.114  | 0.001 |
| 1394330_at   | BF544149 | hypothetical protein LOC361915 /// similar to LRRG00135 (predicted) /// similar to LRRG00135 /// similar to LRRGT00191 (predicted) /// similar to LRRGT00191 /// similar to LRRGT00174 /// similar to LRRG00135 /// similar to LRRG00135 (predicted) /// similar to LRRGT00150 /// similar to LRRGT00108 /// similar to LRRGT00014 /// similar to LRRGT00108 /// hypothetical protein LOC501130 /// similar to LRRG00135 /// similar to LRRG00135 /// similar to LRRG00135 (predicted) /// similar to LRRG00135                                                                                                                               | LOC361915 ///<br>RGD1565352_predicted ///<br>LOC498217 ///<br>RGD1560298_predicted ///<br>LOC498645 /// LOC499198<br>/// LOC499460 ///<br>RGD1561567_predicted ///<br>LOC499804 /// LOC500179<br>/// LOC500617 ///<br>LOC500675 /// LOC501130<br>/// LOC501504 ///<br>LOC501548 ///<br>RGD1562616_predicted ///<br>LOC501637                                | 1.360  | 0.773 | 0.804 | 0.239 | 0.761  | 0.741 | 0.682  | 0.142 |
| 1385067_at   | BE117752 | hypothetical protein LOC361915 /// similar to LRRG00135 (predicted) /// similar to LRRG00135 /// similar to LRRGT00191 /// similar to LRRGT00174 /// similar to LRRG00135 /// similar to LRRG00135 (predicted) /// similar to LRRGT00150 /// similar to LRRGT00108 /// similar to LRRGT00014 /// similar to LRRGT00108 /// hypothetical protein LOC501130 /// similar to LRRG00135 /// similar to LRRG00135 /// similar to LRRG00135 (predicted) /// similar to LRRG00135 /// similar to LRRGT00057 (predicted) /// similar to LRRGT00088 /// similar to ORF2 consensus sequence encoding endonuclease and reverse transcriptase minus RNaseH | LOC361915 ///<br>RGD1565352_predicted ///<br>LOC498217 /// LOC498645<br>/// LOC499198 ///<br>LOC499460 ///<br>RGD1561567_predicted ///<br>LOC499804 /// LOC500179<br>/// LOC500617 ///<br>LOC500675 /// LOC501130<br>/// LOC501504 ///<br>LOC501548 ///<br>RGD1562616_predicted ///<br>LOC501637 ///<br>RGD1564501_predicted ///<br>LOC501760 /// LOC501761 | 1.189  | 0.449 | 0.902 | 0.458 | 0.655  | 0.265 | 0.841  | 0.084 |
| 1391152_at   | AI412781 | hypothetical protein LOC363306 /// similar to RIKEN cDNA 4930555G01 /// similar to RIKEN cDNA 1700001E04 (predicted)                                                                                                                                                                                                                                                                                                                                                                                                                                                                                                                          | LOC363306 /// LOC363318<br>/// RGD1561272_predicted                                                                                                                                                                                                                                                                                                         | 1.048  | 0.915 | 0.769 | 0.076 | 1.286  | 0.330 | 0.844  | 0.096 |
| 1383301_at   | AI237554 | hypothetical protein LOC498154                                                                                                                                                                                                                                                                                                                                                                                                                                                                                                                                                                                                                | LOC498154                                                                                                                                                                                                                                                                                                                                                   | 0.783  | 0.168 | 0.549 | 0.076 | 0.746  | 0.150 | 0.542  | 0.088 |
| 1389488_at   | AA800750 | hypothetical protein LOC498544                                                                                                                                                                                                                                                                                                                                                                                                                                                                                                                                                                                                                | LOC498544                                                                                                                                                                                                                                                                                                                                                   | 1.137  | 0.699 | 1.270 | 0.940 | 1.298  | 0.028 | 1.129  | 0.402 |
| 1389156_at   | BM384589 | hypothetical protein LOC498606                                                                                                                                                                                                                                                                                                                                                                                                                                                                                                                                                                                                                | LOC498606                                                                                                                                                                                                                                                                                                                                                   | 1.004  | 0.937 | 0.983 | 0.432 | 1.056  | 0.695 | 0.963  | 0.414 |
| 1389146_at   | BF283267 | hypothetical protein LOC498796                                                                                                                                                                                                                                                                                                                                                                                                                                                                                                                                                                                                                | LOC498796                                                                                                                                                                                                                                                                                                                                                   | 3.028  | 0.023 | 1.111 | 0.328 | 1.436  | 0.628 | 0.449  | 0.003 |
| 1375927_at   | BE100774 | Hypothetical protein LOC499120                                                                                                                                                                                                                                                                                                                                                                                                                                                                                                                                                                                                                | LOC499120                                                                                                                                                                                                                                                                                                                                                   | 0.455  | 0.002 | 0.481 | 0.007 | 0.667  | 0.074 | 0.595  | 0.009 |
| 1384258_at   | AW920266 | Hypothetical protein LOC499120                                                                                                                                                                                                                                                                                                                                                                                                                                                                                                                                                                                                                | LOC499120                                                                                                                                                                                                                                                                                                                                                   | 1.308  | 0.179 | 1.225 | 0.851 | 1.052  | 0.951 | 1.020  | 0.958 |
| 1377708_at   | BF281491 | hypothetical protein LOC499339                                                                                                                                                                                                                                                                                                                                                                                                                                                                                                                                                                                                                | LOC499339                                                                                                                                                                                                                                                                                                                                                   | 0.961  | 0.558 | 3.790 | 0.001 | 0.856  | 0.598 | 3.493  | 0.001 |
| 1390830_at   | BE113228 | hypothetical protein LOC499602                                                                                                                                                                                                                                                                                                                                                                                                                                                                                                                                                                                                                | LOC499602                                                                                                                                                                                                                                                                                                                                                   | 0.823  | 0.345 | 1.926 | 0.023 | 0.856  | 0.404 | 1.147  | 0.423 |
| 1393696_at   | AA818846 | hypothetical protein LOC499856                                                                                                                                                                                                                                                                                                                                                                                                                                                                                                                                                                                                                | LOC499856                                                                                                                                                                                                                                                                                                                                                   | 0.575  | 0.529 | 0.870 | 0.122 | 0.923  | 0.141 | 0.971  | 0.669 |
| 1380684_at   | BI303657 | Hypothetical protein LOC500086                                                                                                                                                                                                                                                                                                                                                                                                                                                                                                                                                                                                                | LOC500086                                                                                                                                                                                                                                                                                                                                                   | 1.225  | 0.232 | 1.239 | 0.277 | 1.012  | 0.273 | 1.333  | 0.067 |
| 1385950_at   | AI454926 | hypothetical protein LOC500102                                                                                                                                                                                                                                                                                                                                                                                                                                                                                                                                                                                                                | LOC500102                                                                                                                                                                                                                                                                                                                                                   | 3.775  | 0.014 | 1.090 | 0.958 | 1.541  | 0.053 | 1.002  | 0.156 |
| 1373476_at   | AI410833 | hypothetical protein LOC500251                                                                                                                                                                                                                                                                                                                                                                                                                                                                                                                                                                                                                | LOC500251                                                                                                                                                                                                                                                                                                                                                   | 1.131  | 0.103 | 1.244 | 0.010 | 0.998  | 0.637 | 1.118  | 0.105 |
| 1371640_at   | BF289183 | hypothetical protein LOC500855                                                                                                                                                                                                                                                                                                                                                                                                                                                                                                                                                                                                                | LOC500855                                                                                                                                                                                                                                                                                                                                                   | 1.231  | 0.500 | 1.291 | 0.156 | 0.931  | 0.847 | 1.268  | 0.191 |
| 1373819_at   | AI232337 | hypothetical protein LOC500855                                                                                                                                                                                                                                                                                                                                                                                                                                                                                                                                                                                                                | LOC500855                                                                                                                                                                                                                                                                                                                                                   | 0.664  | 0.842 | 0.772 | 0.030 | 0.831  | 0.904 | 0.654  | 0.019 |
| 1383662_at   | AI043759 | hypothetical protein LOC500956                                                                                                                                                                                                                                                                                                                                                                                                                                                                                                                                                                                                                | LOC500956                                                                                                                                                                                                                                                                                                                                                   | 3.188  | 0.001 | 2.108 | 0.002 | 3.162  | 0.002 | 2.097  | 0.002 |
| 1370684_s_at | U08214   | hypothetical protein LOC501546                                                                                                                                                                                                                                                                                                                                                                                                                                                                                                                                                                                                                | LOC501546                                                                                                                                                                                                                                                                                                                                                   | 0.809  | 0.057 | 1.191 | 0.167 | 0.851  | 0.113 | 1.286  | 0.025 |
| 1389814_at   | BI299841 | hypothetical protein LOC501546                                                                                                                                                                                                                                                                                                                                                                                                                                                                                                                                                                                                                | LOC501546                                                                                                                                                                                                                                                                                                                                                   | 0.920  | 0.505 | 0.908 | 0.740 | 1.094  | 0.758 | 0.823  | 0.425 |
| 1372556_at   | AA924509 | hypothetical protein LOC502374                                                                                                                                                                                                                                                                                                                                                                                                                                                                                                                                                                                                                | LOC502374                                                                                                                                                                                                                                                                                                                                                   | 0.873  | 0.830 | 0.848 | 0.096 | 0.937  | 0.404 | 0.944  | 0.395 |
| 1371816_at   | AI407560 | Hypothetical protein LOC502684                                                                                                                                                                                                                                                                                                                                                                                                                                                                                                                                                                                                                | LOC502684                                                                                                                                                                                                                                                                                                                                                   | 1.254  | 0.467 | 0.827 | 0.265 | 0.664  | 0.582 | 0.902  | 0.121 |
| 1374777_at   | BG380800 | hypothetical protein LOC502894                                                                                                                                                                                                                                                                                                                                                                                                                                                                                                                                                                                                                | LOC502894                                                                                                                                                                                                                                                                                                                                                   | 2.388  | 0.073 | 1.501 | 0.952 | 0.881  | 0.953 | 1.319  | 0.600 |
| 1376496_at   | AI717736 | hypothetical protein LOC503164                                                                                                                                                                                                                                                                                                                                                                                                                                                                                                                                                                                                                | LOC503164                                                                                                                                                                                                                                                                                                                                                   | 14.856 | 0.017 | 4.075 | 0.007 | 37.491 | 0.002 | 13.818 | 0.015 |
| 1392908_at   | BG381166 | hypothetical protein LOC595134                                                                                                                                                                                                                                                                                                                                                                                                                                                                                                                                                                                                                | LOC595134                                                                                                                                                                                                                                                                                                                                                   | 1.163  | 0.526 | 1.230 | 0.002 | 0.893  | 0.810 | 1.450  | 0.031 |

|            |           |                                                                                                                                                                                                                                                                                                                                                                                                                                                                                                                                                                                                                                                                     |                                                                                                                                                                                                                                                                 |         |       |        |       |         |       |         |       |
|------------|-----------|---------------------------------------------------------------------------------------------------------------------------------------------------------------------------------------------------------------------------------------------------------------------------------------------------------------------------------------------------------------------------------------------------------------------------------------------------------------------------------------------------------------------------------------------------------------------------------------------------------------------------------------------------------------------|-----------------------------------------------------------------------------------------------------------------------------------------------------------------------------------------------------------------------------------------------------------------|---------|-------|--------|-------|---------|-------|---------|-------|
| 1373011_at | BE109520  | hypothetical protein LOC619558                                                                                                                                                                                                                                                                                                                                                                                                                                                                                                                                                                                                                                      | LOC619558                                                                                                                                                                                                                                                       | 1.855   | 0.000 | 1.270  | 0.022 | 0.881   | 0.590 | 0.938   | 0.076 |
| 1373012_at | BE109520  | Hypothetical protein LOC619558                                                                                                                                                                                                                                                                                                                                                                                                                                                                                                                                                                                                                                      | LOC619558                                                                                                                                                                                                                                                       | 1.798   | 0.034 | 0.968  | 0.735 | 0.869   | 0.777 | 0.750   | 0.013 |
| 1375416_at | AI231165  | hypothetical protein LOC619573                                                                                                                                                                                                                                                                                                                                                                                                                                                                                                                                                                                                                                      | LOC619573                                                                                                                                                                                                                                                       | 0.783   | 0.037 | 1.925  | 0.047 | 0.701   | 0.042 | 1.005   | 0.308 |
| 1372487_at | BI296006  | hypothetical protein LOC619573                                                                                                                                                                                                                                                                                                                                                                                                                                                                                                                                                                                                                                      | LOC619573                                                                                                                                                                                                                                                       | 0.959   | 0.888 | 1.121  | 0.784 | 0.784   | 0.419 | 0.987   | 0.433 |
| 1373831_at | AW920524  | hypothetical protein LOC619574                                                                                                                                                                                                                                                                                                                                                                                                                                                                                                                                                                                                                                      | LOC619574                                                                                                                                                                                                                                                       | 3.623   | 0.002 | 5.509  | 0.008 | 6.122   | 0.004 | 4.508   | 0.002 |
| 1373830_at | AA893539  | hypothetical protein LOC619574                                                                                                                                                                                                                                                                                                                                                                                                                                                                                                                                                                                                                                      | LOC619574                                                                                                                                                                                                                                                       | 1.620   | 0.129 | 1.013  | 0.589 | 2.537   | 0.009 | 1.508   | 0.007 |
| 1388423_at | BM385163  | hypothetical protein MGC:15854                                                                                                                                                                                                                                                                                                                                                                                                                                                                                                                                                                                                                                      | RGD1302996                                                                                                                                                                                                                                                      | 0.925   | 0.621 | 1.891  | 0.002 | 0.549   | 0.321 | 1.411   | 0.010 |
| 1372871_at | AA891821  | hypothetical protein MGC:72616                                                                                                                                                                                                                                                                                                                                                                                                                                                                                                                                                                                                                                      | RGD735175                                                                                                                                                                                                                                                       | 1.387   | 0.245 | 1.831  | 0.037 | 1.147   | 0.571 | 1.430   | 0.041 |
| 1370947_at | AI228197  | hypothetical protein RDA279                                                                                                                                                                                                                                                                                                                                                                                                                                                                                                                                                                                                                                         | Rda279                                                                                                                                                                                                                                                          | 0.818   | 0.306 | 1.916  | 0.029 | 0.696   | 0.109 | 1.635   | 0.043 |
| 1380334_at | AI555044  | hypothetical RNA binding protein RGD1359713                                                                                                                                                                                                                                                                                                                                                                                                                                                                                                                                                                                                                         | RGD1359713                                                                                                                                                                                                                                                      | 1.975   | 0.013 | 1.388  | 0.031 | 1.642   | 0.029 | 1.233   | 0.053 |
| 1376728_at | BM392264  | Hypothetical RNA binding protein RGD1359713                                                                                                                                                                                                                                                                                                                                                                                                                                                                                                                                                                                                                         | RGD1359713                                                                                                                                                                                                                                                      | 1.647   | 0.022 | 1.303  | 0.534 | 1.723   | 0.017 | 0.931   | 0.666 |
| 1376336_at | BM392257  | Hypoxanthine guanine phosphoribosyl transferase                                                                                                                                                                                                                                                                                                                                                                                                                                                                                                                                                                                                                     | Hprt                                                                                                                                                                                                                                                            | 1.048   | 0.458 | 0.554  | 0.078 | 1.797   | 0.030 | 0.726   | 0.052 |
| 1370280_at | M86443    | hypoxanthine guanine phosphoribosyl transferase                                                                                                                                                                                                                                                                                                                                                                                                                                                                                                                                                                                                                     | Hprt                                                                                                                                                                                                                                                            | 0.973   | 0.851 | 1.476  | 0.046 | 1.007   | 0.237 | 1.454   | 0.030 |
| 1370062_at | NM_080902 | hypoxia induced gene 1                                                                                                                                                                                                                                                                                                                                                                                                                                                                                                                                                                                                                                              | Hig1                                                                                                                                                                                                                                                            | 1.124   | 0.322 | 2.730  | 0.028 | 1.104   | 0.437 | 1.769   | 0.048 |
| 1374105_at | H31665    | hypoxia induced gene 1                                                                                                                                                                                                                                                                                                                                                                                                                                                                                                                                                                                                                                              | Hig1                                                                                                                                                                                                                                                            | 0.927   | 0.950 | 2.328  | 0.007 | 0.950   | 0.884 | 1.811   | 0.018 |
| 1387076_at | NM_024359 | hypoxia inducible factor 1, alpha subunit                                                                                                                                                                                                                                                                                                                                                                                                                                                                                                                                                                                                                           | Hif1a                                                                                                                                                                                                                                                           | 2.023   | 0.049 | 2.066  | 0.007 | 1.577   | 0.147 | 2.156   | 0.002 |
| 1371442_at | BI282904  | hypoxia up-regulated 1                                                                                                                                                                                                                                                                                                                                                                                                                                                                                                                                                                                                                                              | Hyou1                                                                                                                                                                                                                                                           | 0.805   | 0.244 | 1.018  | 0.435 | 1.042   | 0.216 | 0.922   | 0.743 |
| 1370665_at | U41853    | hypoxia up-regulated 1                                                                                                                                                                                                                                                                                                                                                                                                                                                                                                                                                                                                                                              | Hyou1                                                                                                                                                                                                                                                           | 0.794   | 0.952 | 0.959  | 0.181 | 0.571   | 0.936 | 0.808   | 0.187 |
| 1393047_at | BF416560  | IBR domain containing 1 (predicted)                                                                                                                                                                                                                                                                                                                                                                                                                                                                                                                                                                                                                                 | Ibrdc1_predicted                                                                                                                                                                                                                                                | 0.901   | 0.912 | 2.549  | 0.004 | 1.002   | 0.972 | 1.830   | 0.021 |
| 1382074_at | AI113237  | IBR domain containing 3 (predicted)                                                                                                                                                                                                                                                                                                                                                                                                                                                                                                                                                                                                                                 | Ibrdc3_predicted                                                                                                                                                                                                                                                | 6.731   | 0.004 | 4.072  | 0.000 | 5.969   | 0.001 | 4.836   | 0.001 |
| 1381709_at | BE098754  | IBR domain containing 3 (predicted)                                                                                                                                                                                                                                                                                                                                                                                                                                                                                                                                                                                                                                 | Ibrdc3_predicted                                                                                                                                                                                                                                                | 0.822   | 0.157 | 1.011  | 0.823 | 0.886   | 0.147 | 1.027   | 0.613 |
| 1389062_at | BE109152  | IK cytokine                                                                                                                                                                                                                                                                                                                                                                                                                                                                                                                                                                                                                                                         | Ik                                                                                                                                                                                                                                                              | 0.724   | 0.138 | 0.990  | 0.721 | 0.744   | 0.043 | 0.992   | 0.714 |
| 1373512_at | BI295737  | ilvB (bacterial acetolactate synthase)-like (predicted)                                                                                                                                                                                                                                                                                                                                                                                                                                                                                                                                                                                                             | Ilvbl_predicted                                                                                                                                                                                                                                                 | 0.447   | 0.060 | 1.038  | 0.938 | 0.353   | 0.057 | 1.111   | 0.313 |
| 1397521_at | BF281905  | ilvB (bacterial acetolactate synthase)-like (predicted)                                                                                                                                                                                                                                                                                                                                                                                                                                                                                                                                                                                                             | Ilvbl_predicted                                                                                                                                                                                                                                                 | 1.002   | 0.919 | 0.998  | 0.832 | 1.003   | 0.955 | 0.999   | 0.913 |
| 1374443_at | AW915478  | immature colon carcinoma transcript 1 (predicted)                                                                                                                                                                                                                                                                                                                                                                                                                                                                                                                                                                                                                   | Ict1_predicted                                                                                                                                                                                                                                                  | 0.682   | 0.483 | 1.218  | 0.109 | 0.522   | 0.169 | 1.368   | 0.040 |
| 1372389_at | BF420059  | immediate early response 2                                                                                                                                                                                                                                                                                                                                                                                                                                                                                                                                                                                                                                          | Ier2                                                                                                                                                                                                                                                            | 1.096   | 0.481 | 1.181  | 0.140 | 1.016   | 0.920 | 1.176   | 0.132 |
| 1388587_at | AI176519  | immediate early response 3                                                                                                                                                                                                                                                                                                                                                                                                                                                                                                                                                                                                                                          | Ier3                                                                                                                                                                                                                                                            | 1.512   | 0.440 | 5.579  | 0.032 | 1.677   | 0.198 | 4.015   | 0.012 |
| 1389355_at | BF285187  | immediate early response 5                                                                                                                                                                                                                                                                                                                                                                                                                                                                                                                                                                                                                                          | Ier5                                                                                                                                                                                                                                                            | 9.029   | 0.000 | 4.314  | 0.001 | 6.519   | 0.003 | 5.362   | 0.005 |
| 1391489_at | AI407339  | immunity-related GTPase family, M                                                                                                                                                                                                                                                                                                                                                                                                                                                                                                                                                                                                                                   | Irgm                                                                                                                                                                                                                                                            | 234.103 | 0.001 | 38.522 | 0.000 | 361.753 | 0.000 | 115.156 | 0.000 |
| 1390104_at | BI296551  | immunity-related GTPase family, Q (predicted)                                                                                                                                                                                                                                                                                                                                                                                                                                                                                                                                                                                                                       | Irgq_predicted                                                                                                                                                                                                                                                  | 0.786   | 0.605 | 0.390  | 0.163 | 1.068   | 0.865 | 0.759   | 0.621 |
| 1369981_at | NM_031624 | immunoglobulin (CD79A) binding protein 1                                                                                                                                                                                                                                                                                                                                                                                                                                                                                                                                                                                                                            | Igbp1                                                                                                                                                                                                                                                           | 0.824   | 0.180 | 1.086  | 0.916 | 0.747   | 0.025 | 1.000   | 0.635 |
| 1371262_at | AJ391299  | immunoglobulin heavy chain (alpha polypeptide) (mapped) /// similar to immunoglobulin heavy chain variable region (predicted) /// gamma-2a immunoglobulin heavy chain /// similar to Immunoglobulin heavy chain (gamma polypeptide) (predicted) /// similar to immunoglobulin heavy chain variable region /// similar to immunoglobulin heavy chain variable region (predicted) /// similar to immunoglobulin heavy chain variable region (predicted) /// similar to immunoglobulin heavy chain variable region (predicted) /// similar to Ig heavy chain V region PJ14 precursor (predicted) /// similar to immunoglobulin heavy chain variable region (predicted) | Igha_mapped ///<br>RGD1564658_predicted ///<br>IgG-2a ///<br>RGD1565478_predicted ///<br>LOC500733 ///<br>RGD1564392_predicted ///<br>RGD1562780_predicted ///<br>LOC500736 ///<br>RGD1562606_predicted ///<br>RGD1563394_predicted ///<br>RGD1564251_predicted | 0.689   | 0.644 | 0.611  | 0.057 | 1.236   | 0.092 | 0.574   | 0.037 |
| 1370594_at | AF322217  | immunoglobulin superfamily, member 1                                                                                                                                                                                                                                                                                                                                                                                                                                                                                                                                                                                                                                | Igsf1                                                                                                                                                                                                                                                           | 0.638   | 0.164 | 0.361  | 0.066 | 0.913   | 0.372 | 0.547   | 0.039 |
| 1370410_at | AF322216  | immunoglobulin superfamily, member 1                                                                                                                                                                                                                                                                                                                                                                                                                                                                                                                                                                                                                                | Igsf1                                                                                                                                                                                                                                                           | 0.854   | 0.302 | 0.457  | 0.039 | 0.822   | 0.428 | 0.494   | 0.023 |
| 1376733_at | AI407898  | immunoglobulin superfamily, member 11                                                                                                                                                                                                                                                                                                                                                                                                                                                                                                                                                                                                                               | Igsf11                                                                                                                                                                                                                                                          | 0.459   | 0.086 | 0.459  | 0.014 | 0.683   | 0.020 | 0.702   | 0.001 |
| 1377508_at | BI298836  | Immunoglobulin superfamily, member 11                                                                                                                                                                                                                                                                                                                                                                                                                                                                                                                                                                                                                               | Igsf11                                                                                                                                                                                                                                                          | 0.804   | 0.361 | 0.762  | 0.093 | 0.737   | 0.003 | 0.747   | 0.088 |
| 1376657_at | BE117767  | immunoglobulin superfamily, member 4A                                                                                                                                                                                                                                                                                                                                                                                                                                                                                                                                                                                                                               | Igsf4a                                                                                                                                                                                                                                                          | 1.058   | 0.138 | 0.934  | 0.103 | 0.824   | 0.833 | 0.803   | 0.051 |
| 1384132_at | H31111    | immunoglobulin superfamily, member 4A                                                                                                                                                                                                                                                                                                                                                                                                                                                                                                                                                                                                                               | Igsf4a                                                                                                                                                                                                                                                          | 1.022   | 0.930 | 0.827  | 0.205 | 0.685   | 0.257 | 0.849   | 0.219 |
| 1391887_at | BG372263  | immunoglobulin superfamily, member 9 (predicted)                                                                                                                                                                                                                                                                                                                                                                                                                                                                                                                                                                                                                    | Igsf9_predicted                                                                                                                                                                                                                                                 | 1.128   | 0.122 | 0.994  | 0.974 | 1.493   | 0.145 | 1.201   | 0.854 |
| 1388321_at | BG378108  | IMP3, U3 small nucleolar ribonucleoprotein, homolog (yeast) (predicted)                                                                                                                                                                                                                                                                                                                                                                                                                                                                                                                                                                                             | Imp3_predicted                                                                                                                                                                                                                                                  | 0.395   | 0.002 | 0.853  | 0.024 | 0.416   | 0.013 | 0.875   | 0.187 |
| 1379407_at | BE104538  | IMP4, U3 small nucleolar ribonucleoprotein, homolog (yeast)                                                                                                                                                                                                                                                                                                                                                                                                                                                                                                                                                                                                         | Imp4                                                                                                                                                                                                                                                            | 0.515   | 0.380 | 1.221  | 0.130 | 0.535   | 0.355 | 1.147   | 0.206 |
| 1371957_at | BM388851  | IMP4, U3 small nucleolar ribonucleoprotein, homolog (yeast)                                                                                                                                                                                                                                                                                                                                                                                                                                                                                                                                                                                                         | Imp4                                                                                                                                                                                                                                                            | 0.913   | 0.798 | 1.215  | 0.091 | 0.775   | 0.095 | 1.184   | 0.043 |
| 1369868_at | NM_053946 | implantation-associated protein                                                                                                                                                                                                                                                                                                                                                                                                                                                                                                                                                                                                                                     | Iag2                                                                                                                                                                                                                                                            | 0.640   | 0.323 | 0.786  | 0.044 | 0.695   | 0.117 | 0.628   | 0.008 |
| 1367876_at | NM_053778 | importin 13                                                                                                                                                                                                                                                                                                                                                                                                                                                                                                                                                                                                                                                         | Ipo13                                                                                                                                                                                                                                                           | 0.834   | 0.194 | 1.009  | 0.842 | 0.824   | 0.463 | 1.017   | 0.929 |
| 1374135_at | AI233262  | importin 4 (predicted)                                                                                                                                                                                                                                                                                                                                                                                                                                                                                                                                                                                                                                              | Ipo4_predicted                                                                                                                                                                                                                                                  | 0.777   | 0.465 | 2.385  | 0.003 | 0.646   | 0.020 | 1.885   | 0.000 |
| 1375185_at | BM390183  | importin 7 (predicted)                                                                                                                                                                                                                                                                                                                                                                                                                                                                                                                                                                                                                                              | Ipo7_predicted                                                                                                                                                                                                                                                  | 1.074   | 0.602 | 2.149  | 0.017 | 0.953   | 0.724 | 1.940   | 0.039 |
| 1380578_at | AA859349  | Importin 7 (predicted)                                                                                                                                                                                                                                                                                                                                                                                                                                                                                                                                                                                                                                              | Ipo7_predicted                                                                                                                                                                                                                                                  | 0.918   | 0.890 | 2.102  | 0.868 | 1.268   | 0.608 | 1.140   | 0.232 |
| 1389984_at | AI072294  | Importin 9 (predicted)                                                                                                                                                                                                                                                                                                                                                                                                                                                                                                                                                                                                                                              | Ipo9_predicted                                                                                                                                                                                                                                                  | 0.968   | 0.082 | 0.398  | 0.002 | 1.486   | 0.088 | 0.459   | 0.097 |
| 1372723_at | BF396318  | Importin 9 (predicted)                                                                                                                                                                                                                                                                                                                                                                                                                                                                                                                                                                                                                                              | Ipo9_predicted                                                                                                                                                                                                                                                  | 1.073   | 0.311 | 0.642  | 0.001 | 1.110   | 0.658 | 0.811   | 0.037 |
| 1373972_at | BF387266  | importin 9 (predicted)                                                                                                                                                                                                                                                                                                                                                                                                                                                                                                                                                                                                                                              | Ipo9_predicted                                                                                                                                                                                                                                                  | 1.174   | 0.944 | 1.354  | 0.954 | 1.260   | 0.393 | 0.992   | 0.998 |
| 1372193_at | AI408713  | imprinted and ancient                                                                                                                                                                                                                                                                                                                                                                                                                                                                                                                                                                                                                                               | Impact                                                                                                                                                                                                                                                          | 1.619   | 0.056 | 1.454  | 0.006 | 1.732   | 0.062 | 1.334   | 0.010 |

|              |           |                                                                                             |                     |        |       |       |       |        |       |        |       |
|--------------|-----------|---------------------------------------------------------------------------------------------|---------------------|--------|-------|-------|-------|--------|-------|--------|-------|
| 1395339_at   | BG664101  | imprinted and ancient                                                                       | Impact              | 0.933  | 0.651 | 0.997 | 0.325 | 1.000  | 0.419 | 0.736  | 0.744 |
| 1375754_at   | AA850890  | imprinted and ancient                                                                       | Impact              | 0.999  | 0.721 | 1.811 | 0.269 | 0.938  | 0.418 | 1.539  | 0.081 |
| 1387608_at   | NM_023973 | indoleamine-pyrrole 2,3 dioxygenase                                                         | Indo                | 18.955 | 0.030 | 8.001 | 0.002 | 30.369 | 0.000 | 19.816 | 0.000 |
| 1370769_a_at | AB023133  | inducible T-cell co-stimulator                                                              | Icos                | 1.054  | 0.794 | 0.993 | 0.647 | 0.913  | 0.534 | 1.002  | 0.847 |
| 1389521_at   | AI408553  | influenza virus NS1A binding protein (predicted)                                            | Ivns1abp_predicted  | 0.683  | 0.127 | 0.726 | 0.012 | 0.620  | 0.064 | 0.663  | 0.002 |
| 1387124_at   | NM_012590 | inhibin alpha                                                                               | Inha                | 0.777  | 0.245 | 0.979 | 0.913 | 0.775  | 0.247 | 0.982  | 0.993 |
| 1369238_at   | NM_031815 | inhibin beta E /// hypothetical gene supported by NM_031815                                 | Inhbe /// LOC497821 | 0.867  | 0.662 | 0.966 | 0.488 | 0.865  | 0.417 | 0.897  | 0.651 |
| 1387028_a_at | M86708    | inhibitor of DNA binding 1                                                                  | Id1                 | 1.048  | 0.931 | 0.996 | 0.982 | 0.959  | 0.964 | 0.998  | 0.750 |
| 1385923_at   | AA944139  | Inhibitor of DNA binding 4                                                                  | Id4                 | 1.731  | 0.335 | 2.234 | 0.109 | 1.072  | 0.382 | 1.368  | 0.375 |
| 1373457_at   | AI170649  | inhibitor of growth family, member 1                                                        | Ing1                | 0.937  | 0.291 | 0.998 | 0.050 | 0.987  | 0.797 | 0.625  | 0.028 |
| 1376758_at   | AW532065  | inhibitor of growth family, member 1                                                        | Ing1                | 1.110  | 0.311 | 1.373 | 0.196 | 1.231  | 0.267 | 0.891  | 0.418 |
| 1386129_at   | BF523624  | inhibitor of growth family, member 1-like (predicted)                                       | Ing1l_predicted     | 0.967  | 0.182 | 1.176 | 0.112 | 0.568  | 0.009 | 1.158  | 0.836 |
| 1392165_at   | AI071247  | inhibitor of growth family, member 1-like (predicted)                                       | Ing1l_predicted     | 0.738  | 0.206 | 1.522 | 0.007 | 0.502  | 0.001 | 1.040  | 0.703 |
| 1372945_at   | BI296751  | inhibitor of growth family, member 3                                                        | Ing3                | 1.208  | 0.710 | 1.410 | 0.404 | 1.036  | 0.145 | 1.103  | 0.087 |
| 1373817_at   | BM391761  | inhibitor of growth family, member 4                                                        | Ing4                | 0.984  | 0.807 | 1.259 | 0.190 | 0.992  | 0.983 | 1.052  | 0.019 |
| 1376812_at   | BF419731  | Inhibitor of growth family, member 5 (predicted)                                            | Ing5_predicted      | 0.844  | 0.987 | 0.843 | 0.029 | 0.830  | 0.220 | 0.935  | 0.738 |
| 1387115_at   | NM_080899 | inhibitor of kappa light polypeptide enhancer in B-cells, kinase complex-associated protein | Ikbkap              | 0.967  | 0.054 | 1.498 | 0.012 | 0.869  | 0.467 | 1.131  | 0.120 |
| 1368424_at   | NM_053355 | inhibitor of kappaB kinase beta                                                             | Ikbkb               | 2.296  | 0.026 | 1.748 | 0.045 | 1.641  | 0.150 | 1.189  | 0.196 |
| 1383292_at   | AI599126  | inner centromere protein (predicted)                                                        | Incenp_predicted    | 0.999  | 0.994 | 0.997 | 0.920 | 1.003  | 0.971 | 0.994  | 0.962 |
| 1385423_at   | AW521399  | inner membrane protein, mitochondrial                                                       | Immt                | 0.529  | 0.019 | 0.543 | 0.132 | 0.607  | 0.014 | 0.475  | 0.090 |
| 1372080_at   | BI287936  | inner membrane protein, mitochondrial                                                       | Immt                | 0.613  | 0.025 | 0.904 | 0.134 | 0.610  | 0.000 | 0.900  | 0.673 |
| 1375597_at   | BI300655  | Inner membrane protein, mitochondrial                                                       | Immt                | 0.892  | 0.551 | 1.346 | 0.343 | 1.366  | 0.184 | 0.963  | 0.963 |
| 1388629_at   | BF281278  | inosine 5-monophosphate dehydrogenase 2                                                     | Impdh2              | 0.488  | 0.024 | 1.900 | 0.002 | 0.484  | 0.005 | 1.343  | 0.012 |
| 1372732_at   | BM386917  | inosine triphosphatase (nucleoside triphosphate pyrophosphatase) (mapped)                   | Itpa_mapped         | 0.785  | 0.131 | 0.896 | 0.324 | 0.610  | 0.040 | 0.810  | 0.538 |
| 1398808_at   | NM_032057 | Inositol (myo)-1(or 4)-monophosphatase 1                                                    | Impa1               | 0.433  | 0.064 | 0.562 | 0.012 | 0.466  | 0.026 | 0.563  | 0.009 |
| 1381016_at   | BI288152  | Inositol 1,3,4,5,6-pentakisphosphate 2-kinase                                               | Ippk                | 0.661  | 0.463 | 0.683 | 0.024 | 0.290  | 0.003 | 0.466  | 0.006 |
| 1387907_at   | J05510    | inositol 1,4,5-triphosphate receptor 1                                                      | Itpr1               | 0.577  | 0.036 | 0.226 | 0.001 | 0.926  | 0.047 | 0.333  | 0.031 |
| 1378334_a_at | BF417289  | Inositol 1,4,5-triphosphate receptor 2                                                      | Itpr2               | 0.488  | 0.077 | 0.627 | 0.119 | 0.422  | 0.068 | 0.520  | 0.159 |
| 1368005_at   | NM_013138 | inositol 1,4,5-triphosphate receptor 3                                                      | Itpr3               | 1.808  | 0.112 | 2.492 | 0.003 | 1.302  | 0.023 | 1.803  | 0.011 |
| 1388500_at   | AI180252  | Inositol 1,4,5-trisphosphate 3-kinase B                                                     | Itpkb               | 0.461  | 0.070 | 0.165 | 0.001 | 0.395  | 0.002 | 0.169  | 0.005 |
| 1373623_at   | BI278809  | inositol 1,4,5-trisphosphate 3-kinase C                                                     | Itpkc               | 1.377  | 0.967 | 1.296 | 0.016 | 1.415  | 0.112 | 1.102  | 0.029 |
| 1387904_at   | AB049151  | inositol hexaphosphate kinase 1                                                             | Ihpk1               | 1.060  | 0.359 | 1.333 | 0.027 | 1.710  | 0.039 | 1.454  | 0.007 |
| 1378212_at   | BI303251  | Inositol hexaphosphate kinase 1                                                             | Ihpk1               | 1.026  | 0.893 | 1.179 | 0.394 | 1.627  | 0.006 | 1.016  | 0.895 |
| 1387063_at   | NM_021660 | inositol hexaphosphate kinase 2                                                             | Ihpk2               | 0.729  | 0.256 | 0.528 | 0.006 | 1.033  | 0.710 | 0.629  | 0.000 |
| 1395036_at   | BF386788  | inositol monophosphatase domain containing 1                                                | Impad1              | 0.696  | 0.120 | 1.525 | 0.009 | 1.212  | 0.486 | 1.499  | 0.017 |
| 1398652_at   | BF396528  | inositol monophosphatase domain containing 1                                                | Impad1              | 0.872  | 0.897 | 0.392 | 0.036 | 0.637  | 0.905 | 0.476  | 0.049 |
| 1368340_at   | NM_134417 | inositol polyphosphate multikinase                                                          | Ipmk                | 0.479  | 0.042 | 1.400 | 0.062 | 0.387  | 0.020 | 1.064  | 0.746 |
| 1370651_a_at | AB011439  | inositol polyphosphate phosphatase-like 1                                                   | Inpp1l              | 1.003  | 0.160 | 0.999 | 0.736 | 1.017  | 0.917 | 0.990  | 0.997 |
| 1368022_at   | NM_022944 | inositol polyphosphate phosphatase-like 1                                                   | Inpp1l              | 0.976  | 0.988 | 0.843 | 0.945 | 0.747  | 0.285 | 0.616  | 0.103 |
| 1399125_at   | BI275516  | inositol polyphosphate-1-phosphatase                                                        | Inpp1               | 9.327  | 0.007 | 5.154 | 0.000 | 7.429  | 0.000 | 3.293  | 0.001 |
| 1394340_at   | BF523172  | inositol polyphosphate-1-phosphatase                                                        | Inpp1               | 4.257  | 0.019 | 2.357 | 0.047 | 4.338  | 0.024 | 1.349  | 0.356 |
| 1387078_at   | NM_031002 | inositol polyphosphate-4-phosphatase, type 1                                                | Inpp4a              | 1.606  | 0.189 | 0.663 | 0.036 | 1.577  | 0.283 | 0.413  | 0.008 |
| 1388697_at   | BI279692  | inositol polyphosphate-5-phosphatase A (predicted)                                          | Inpp5a_predicted    | 0.561  | 0.238 | 0.797 | 0.511 | 0.616  | 0.341 | 1.127  | 0.864 |
| 1388502_at   | AI412624  | inositol polyphosphate-5-phosphatase B                                                      | Inpp5b              | 1.693  | 0.084 | 1.810 | 0.011 | 3.448  | 0.003 | 2.914  | 0.009 |
| 1370945_at   | BF282728  | inositol polyphosphate-5-phosphatase E                                                      | Inpp5e              | 0.838  | 0.533 | 0.974 | 0.970 | 0.421  | 0.122 | 1.287  | 0.871 |
| 1389176_at   | BF282674  | Inositol polyphosphate-5-phosphatase F (predicted)                                          | Inpp5f_predicted    | 0.499  | 0.000 | 0.628 | 0.048 | 0.585  | 0.141 | 0.718  | 0.029 |
| 1391312_at   | BE108090  | inositol polyphosphate-5-phosphatase F (predicted)                                          | Inpp5f_predicted    | 0.850  | 0.236 | 1.160 | 0.854 | 0.510  | 0.022 | 1.023  | 0.626 |
| 1387815_at   | NM_019129 | insulin 1                                                                                   | Ins1                | 0.937  | 0.180 | 0.745 | 0.003 | 1.036  | 0.613 | 0.789  | 0.001 |
| 1370077_at   | NM_019130 | insulin 2                                                                                   | Ins2                | 0.862  | 0.073 | 0.681 | 0.003 | 0.992  | 0.886 | 0.754  | 0.000 |
| 1387652_at   | BI291249  | insulin degrading enzyme                                                                    | Ide                 | 0.464  | 0.065 | 6.252 | 0.007 | 0.480  | 0.039 | 2.425  | 0.035 |
| 1367894_at   | NM_022392 | insulin induced gene 1                                                                      | Insig1              | 0.545  | 0.322 | 1.225 | 0.040 | 0.509  | 0.117 | 0.987  | 0.955 |
| 1393690_at   | AA818627  | insulin induced gene 2                                                                      | Insig2              | 1.749  | 0.225 | 2.207 | 0.008 | 1.771  | 0.884 | 2.021  | 0.017 |
| 1389377_at   | AA851803  | insulin induced gene 2                                                                      | Insig2              | 0.494  | 0.234 | 1.371 | 0.106 | 0.815  | 0.150 | 1.366  | 0.063 |
| 1392043_at   | BE116206  | Insulin receptor                                                                            | Insr                | 0.804  | 0.532 | 0.470 | 0.239 | 1.051  | 0.423 | 0.491  | 0.247 |
| 1369771_at   | NM_012969 | insulin receptor substrate 1                                                                | Irs1                | 0.957  | 0.923 | 0.748 | 0.060 | 1.383  | 0.348 | 0.428  | 0.006 |
| 1384500_at   | BI288565  | insulin responsive sequence DNA binding protein-1                                           | Sned1               | 0.925  | 0.300 | 0.916 | 0.614 | 1.668  | 0.202 | 1.249  | 0.349 |
| 1394615_at   | AI511008  | Insulin responsive sequence DNA binding protein-1                                           | Sned1               | 1.115  | 0.866 | 0.950 | 0.828 | 1.011  | 0.953 | 0.953  | 0.590 |
| 1380250_at   | AI013978  | insulin responsive sequence DNA binding protein-1                                           | Sned1               | 1.090  | 0.896 | 0.906 | 0.418 | 1.676  | 0.031 | 0.829  | 0.165 |
| 1380971_at   | BE120747  | Insulin-like growth factor 1 receptor                                                       | Igf1r               | 2.656  | 0.038 | 1.534 | 0.022 | 2.279  | 0.057 | 1.082  | 0.510 |
| 1368123_at   | NM_052807 | insulin-like growth factor 1 receptor                                                       | Igf1r               | 1.366  | 0.048 | 1.855 | 0.003 | 1.349  | 0.006 | 1.369  | 0.028 |
| 1390671_at   | AI044666  | Insulin-like growth factor 1 receptor                                                       | Igf1r               | 1.592  | 0.173 | 1.995 | 0.006 | 1.777  | 0.012 | 1.712  | 0.021 |



|              |           |                                                                    |                                  |         |       |         |       |         |       |         |       |
|--------------|-----------|--------------------------------------------------------------------|----------------------------------|---------|-------|---------|-------|---------|-------|---------|-------|
| 1367571_a_at | NM_031511 | insulin-like growth factor 2                                       | Igf2                             | 0.724   | 0.315 | 0.285   | 0.040 | 2.029   | 0.253 | 0.540   | 0.040 |
| 1372993_at   | BI299621  | Insulin-like growth factor 2 receptor                              | Igf2r                            | 0.888   | 0.064 | 1.037   | 0.592 | 1.627   | 0.123 | 0.979   | 0.813 |
| 1367636_at   | NM_012756 | insulin-like growth factor 2 receptor                              | Igf2r                            | 0.943   | 0.540 | 1.237   | 0.014 | 0.898   | 0.831 | 1.083   | 0.025 |
| 1386872_at   | BI296290  | insulin-like growth factor 2 receptor                              | Igf2r                            | 1.001   | 0.706 | 1.903   | 0.037 | 0.925   | 0.928 | 1.609   | 0.130 |
| 1368160_at   | NM_013144 | insulin-like growth factor binding protein 1                       | Igfbp1                           | 3.190   | 0.030 | 5.871   | 0.001 | 1.217   | 0.888 | 0.384   | 0.143 |
| 1370960_at   | BE104060  | insulin-like growth factor binding protein 5                       | Igfbp5                           | 1.721   | 0.851 | 0.896   | 0.759 | 1.489   | 0.833 | 1.261   | 0.558 |
| 1371357_at   | AI233246  | insulin-like growth factor binding protein 7                       | Igfbp7                           | 0.830   | 0.310 | 0.375   | 0.000 | 1.046   | 0.279 | 0.707   | 0.011 |
| 1371320_at   | BF282337  | integral membrane protein 2B                                       | Itm2b                            | 0.859   | 0.404 | 0.984   | 0.958 | 0.806   | 0.169 | 1.139   | 0.016 |
| 1371319_at   | BI278308  | integral membrane protein 2B                                       | Itm2b                            | 0.851   | 0.575 | 0.838   | 0.192 | 0.738   | 0.487 | 0.988   | 0.847 |
| 1391171_at   | AW534352  | Integral membrane protein 2B                                       | Itm2b                            | 1.012   | 0.986 | 1.710   | 0.042 | 1.150   | 0.928 | 0.966   | 0.788 |
| 1371334_at   | BG668228  | integral membrane protein 2C                                       | Itm2c                            | 0.746   | 0.600 | 0.486   | 0.043 | 0.815   | 0.201 | 0.632   | 0.005 |
| 1389282_at   | BI292586  | Integrin alpha 3 (predicted)                                       | Itga3_predicted                  | 1.246   | 0.118 | 1.581   | 0.128 | 2.073   | 0.041 | 1.637   | 0.047 |
| 1379530_at   | AA964658  | Integrin alpha 9                                                   | Itga9                            | 2.221   | 0.110 | 1.043   | 0.842 | 1.198   | 0.467 | 1.026   | 0.915 |
| 1398736_at   | BF399976  | Integrin alpha 9                                                   | Itga9                            | 1.467   | 0.139 | 2.600   | 0.023 | 1.087   | 0.285 | 1.455   | 0.029 |
| 1383880_at   | BF418243  | integrin alpha V (predicted)                                       | Itgav_predicted                  | 3.899   | 0.055 | 6.857   | 0.001 | 3.510   | 0.129 | 10.425  | 0.005 |
| 1386581_at   | AW141214  | integrin alpha V (predicted)                                       | Itgav_predicted                  | 1.144   | 0.699 | 3.697   | 0.007 | 1.035   | 0.859 | 5.253   | 0.002 |
| 1368819_at   | AI177366  | integrin beta 1 (fibronectin receptor beta)                        | Itgb1                            | 0.808   | 0.636 | 0.858   | 0.210 | 0.978   | 0.832 | 0.884   | 0.043 |
| 1387346_at   | NM_017022 | integrin beta 1 (fibronectin receptor beta)                        | Itgb1                            | 0.857   | 0.711 | 0.830   | 0.288 | 0.912   | 0.543 | 0.749   | 0.124 |
| 1398395_at   | AW434272  | integrin beta 1 binding protein 1 (predicted)                      | Itgb1bp1_predicted               | 0.731   | 0.091 | 0.911   | 0.768 | 0.502   | 0.015 | 0.899   | 0.124 |
| 1378448_at   | BI295914  | integrin beta 1 binding protein 1 (predicted)                      | Itgb1bp1_predicted               | 1.163   | 0.227 | 1.683   | 0.043 | 1.177   | 0.147 | 1.382   | 0.267 |
| 1390604_s_at | BM387863  | integrin beta 3 binding protein (beta3-endonexin)                  | Itgb3bp                          | 0.828   | 0.022 | 0.999   | 0.830 | 0.689   | 0.057 | 1.001   | 0.985 |
| 1377182_at   | BM387863  | integrin beta 3 binding protein (beta3-endonexin)                  | Itgb3bp                          | 0.431   | 0.079 | 0.919   | 0.565 | 0.390   | 0.030 | 0.858   | 0.699 |
| 1388507_at   | AI104279  | integrin beta 4 binding protein                                    | Itgb4bp                          | 1.486   | 0.056 | 2.625   | 0.000 | 1.390   | 0.021 | 2.563   | 0.011 |
| 1377974_at   | AI502837  | Integrin beta 8 (predicted)                                        | Itgb8_predicted                  | 0.575   | 0.052 | 1.364   | 0.419 | 0.593   | 0.021 | 1.055   | 0.625 |
| 1387777_at   | NM_133409 | integrin linked kinase                                             | Ilk                              | 1.419   | 0.103 | 1.038   | 0.453 | 1.814   | 0.006 | 1.176   | 0.041 |
| 1370526_at   | AF020045  | integrin, alpha E, epithelial-associated                           | Itgae                            | 0.378   | 0.071 | 0.674   | 0.026 | 0.362   | 0.010 | 0.828   | 0.029 |
| 1370801_at   | AF336872  | integrin, beta 5                                                   | Itgb5                            | 1.157   | 0.419 | 1.033   | 0.644 | 1.207   | 0.181 | 0.982   | 0.120 |
| 1382439_at   | AI070686  | integrin, beta 6                                                   | Itgb6                            | 2.217   | 0.048 | 1.294   | 0.230 | 2.470   | 0.004 | 1.106   | 0.427 |
| 1367921_at   | NM_022606 | integrin-linked kinase-associated serine/threonine phosphatase 2C  | Ilkap                            | 0.799   | 0.101 | 0.763   | 0.484 | 0.865   | 0.079 | 0.967   | 0.891 |
| 1383476_at   | AW528065  | Inter-alpha trypsin inhibitor, heavy chain 3                       | Itih3                            | 5.966   | 0.000 | 3.093   | 0.001 | 7.760   | 0.000 | 3.259   | 0.003 |
| 1387202_at   | NM_012967 | intercellular adhesion molecule 1                                  | Icam1                            | 192.893 | 0.001 | 93.187  | 0.001 | 541.520 | 0.000 | 152.836 | 0.000 |
| 1398523_a_at | AA900618  | interferon (alpha and beta) receptor 1 (predicted)                 | Ifnar1_predicted                 | 1.007   | 0.977 | 0.974   | 0.909 | 1.001   | 0.981 | 1.042   | 0.770 |
| 1396163_at   | BF563316  | interferon gamma induced GTPase                                    | Igtp                             | 4.535   | 0.003 | 2.000   | 0.245 | 3.933   | 0.012 | 6.972   | 0.278 |
| 1375796_at   | BI300770  | interferon gamma induced GTPase /// similar to Ac2-233 (predicted) | Igtp ///<br>RGD1566055_predicted | 32.177  | 0.014 | 7.961   | 0.003 | 45.649  | 0.000 | 11.240  | 0.007 |
| 1372070_at   | BM389261  | interferon gamma inducible protein 30                              | Ifi30                            | 0.596   | 0.287 | 1.840   | 0.052 | 0.765   | 0.067 | 2.035   | 0.014 |
| 1369956_at   | NM_053783 | interferon gamma receptor 1                                        | Ifngr                            | 1.471   | 0.119 | 1.811   | 0.012 | 1.461   | 0.069 | 1.738   | 0.001 |
| 1374601_at   | BI274482  | interferon gamma receptor 2 (predicted)                            | Ifngr2_predicted                 | 1.716   | 0.010 | 1.494   | 0.026 | 4.218   | 0.001 | 2.180   | 0.017 |
| 1367696_at   | NM_030833 | interferon induced transmembrane protein 2 (1-8D)                  | Ifitm2                           | 0.999   | 0.465 | 0.595   | 0.030 | 1.036   | 0.771 | 0.707   | 0.143 |
| 1387995_a_at | BI285494  | interferon induced transmembrane protein 3                         | Ifitm3                           | 1.141   | 0.083 | 1.164   | 0.034 | 7.296   | 0.004 | 9.552   | 0.000 |
| 1368073_at   | NM_012591 | interferon regulatory factor 1                                     | Irf1                             | 66.392  | 0.001 | 19.845  | 0.001 | 105.828 | 0.001 | 34.763  | 0.000 |
| 1371560_at   | AA893384  | interferon regulatory factor 3                                     | Irf3                             | 0.813   | 0.067 | 0.702   | 0.003 | 0.866   | 0.201 | 0.575   | 0.005 |
| 1377379_at   | BF410603  | interferon regulatory factor 6 (predicted)                         | Irf6_predicted                   | 1.452   | 0.124 | 1.672   | 0.002 | 1.343   | 0.019 | 1.682   | 0.001 |
| 1386568_at   | BF557891  | interferon regulatory factor 6 (predicted)                         | Irf6_predicted                   | 1.154   | 0.182 | 1.426   | 0.021 | 0.980   | 0.091 | 1.584   | 0.036 |
| 1383564_at   | BF411036  | interferon regulatory factor 7                                     | Irf7                             | 90.308  | 0.000 | 22.639  | 0.004 | 427.276 | 0.000 | 104.708 | 0.001 |
| 1372097_at   | BF284262  | Interferon regulatory factor 8                                     | Irf8                             | 81.264  | 0.000 | 12.276  | 0.000 | 57.633  | 0.001 | 3.574   | 0.084 |
| 1390507_at   | BI296097  | interferon stimulated exonuclease 20                               | Isg20                            | 2.402   | 0.000 | 3.134   | 0.000 | 2.715   | 0.003 | 3.479   | 0.016 |
| 1383491_at   | BM391709  | interferon stimulated exonuclease gene 20-like 1 (predicted)       | Isg20l1_predicted                | 1.295   | 0.277 | 7.085   | 0.000 | 0.802   | 0.223 | 5.863   | 0.001 |
| 1382792_at   | BF412158  | Interferon stimulated exonuclease gene 20-like 2                   | Isg20l2                          | 1.443   | 0.005 | 0.993   | 0.458 | 1.210   | 0.073 | 0.979   | 0.864 |
| 1382314_at   | BE096523  | interferon, alpha-inducible protein (clone IFI-15K) (predicted)    | Glp2_predicted                   | 179.793 | 0.000 | 235.917 | 0.006 | 750.732 | 0.000 | 649.312 | 0.004 |
| 1382073_at   | AI179042  | Interferon, kappa (predicted)                                      | Ifnk_predicted                   | 0.978   | 0.943 | 1.023   | 0.236 | 1.220   | 0.199 | 0.905   | 0.119 |
| 1374551_at   | BM388891  | interferon-induced protein 35                                      | Ifi35                            | 3.427   | 0.090 | 2.301   | 0.010 | 5.642   | 0.008 | 2.992   | 0.012 |
| 1381014_at   | BI274623  | interferon-induced protein 44                                      | Ifi44                            | 9.795   | 0.000 | 7.773   | 0.000 | 27.596  | 0.000 | 16.137  | 0.000 |
| 1384180_at   | BE118697  | interferon-induced protein with tetratricopeptide repeats 2        | Ifit2                            | 13.497  | 0.008 | 2.122   | 0.074 | 183.348 | 0.001 | 30.924  | 0.002 |
| 1379568_at   | AI009765  | interferon-induced protein with tetratricopeptide repeats 2        | Ifit2                            | 1.570   | 0.220 | 1.127   | 0.589 | 8.735   | 0.001 | 4.530   | 0.002 |
| 1376908_at   | AW531805  | interferon-induced protein with tetratricopeptide repeats 3        | Ifit3                            | 1.019   | 0.976 | 1.018   | 0.105 | 87.295  | 0.001 | 24.041  | 0.029 |
| 1367795_at   | NM_019242 | interferon-related developmental regulator 1                       | Ifrd1                            | 0.965   | 0.803 | 2.089   | 0.002 | 1.280   | 0.321 | 1.943   | 0.004 |
| 1373068_at   | AI236977  | interferon-related developmental regulator 2 (predicted)           | Ifrd2_predicted                  | 0.658   | 0.037 | 3.094   | 0.000 | 0.713   | 0.303 | 2.254   | 0.001 |
| 1371170_a_at | AJ245643  | interleukin 1 alpha                                                | Il1a                             | 1.288   | 0.638 | 1.099   | 0.159 | 1.003   | 0.523 | 1.157   | 0.161 |
| 1387507_at   | NM_012968 | interleukin 1 receptor accessory protein                           | Il1rap                           | 1.004   | 0.957 | 0.999   | 0.593 | 0.998   | 0.934 | 1.000   | 0.998 |
| 1370750_a_at | U14010    | interleukin 1 receptor, type I                                     | Il1r1                            | 0.721   | 0.499 | 0.289   | 0.018 | 0.699   | 0.048 | 0.258   | 0.098 |

|              |           |                                                                           |                      |        |       |        |       |        |       |        |       |
|--------------|-----------|---------------------------------------------------------------------------|----------------------|--------|-------|--------|-------|--------|-------|--------|-------|
| 1387273_at   | NM_013037 | interleukin 1 receptor-like 1                                             | Il1rl1               | 1.781  | 0.438 | 0.889  | 0.741 | 1.067  | 0.535 | 0.813  | 0.229 |
| 1387504_at   | NM_133575 | interleukin 1 receptor-like 2                                             | Il1rl2               | 0.889  | 0.401 | 0.999  | 0.886 | 0.996  | 0.705 | 1.019  | 0.940 |
| 1388711_at   | BF282650  | interleukin 13 receptor, alpha 1                                          | Il13ra1              | 3.091  | 0.069 | 2.075  | 0.005 | 3.098  | 0.005 | 3.214  | 0.000 |
| 1368375_a_at | AF015718  | interleukin 15                                                            | Il15                 | 10.358 | 0.000 | 6.836  | 0.000 | 32.084 | 0.000 | 20.423 | 0.003 |
| 1373611_at   | BI279744  | interleukin 17 receptor (predicted)                                       | Il17r_predicted      | 2.150  | 0.033 | 2.159  | 0.052 | 1.626  | 0.079 | 1.316  | 0.111 |
| 1369665_a_at | AJ222813  | interleukin 18                                                            | Il18                 | 1.489  | 0.111 | 2.108  | 0.020 | 1.831  | 0.013 | 2.245  | 0.003 |
| 1369031_at   | NM_053374 | interleukin 18 binding protein                                            | Il18bp               | 15.741 | 0.002 | 11.891 | 0.000 | 15.344 | 0.000 | 22.346 | 0.000 |
| 1391612_at   | BF282190  | interleukin 22 receptor, alpha 2                                          | Il22ra2              | 1.160  | 0.950 | 0.990  | 0.848 | 3.318  | 0.033 | 1.000  | 0.994 |
| 1387642_at   | NM_130410 | Interleukin 23, alpha subunit p19                                         | Il23a                | 1.711  | 0.265 | 5.895  | 0.019 | 1.000  | 0.997 | 4.709  | 0.024 |
| 1386987_at   | NM_017020 | interleukin 6 receptor, alpha                                             | Il6ra                | 1.309  | 0.969 | 0.873  | 0.649 | 1.302  | 0.979 | 0.541  | 0.109 |
| 1371926_at   | AI171807  | Interleukin 6 signal transducer                                           | Il6st                | 1.545  | 0.104 | 5.592  | 0.000 | 1.473  | 0.093 | 4.657  | 0.000 |
| 1383489_at   | BG663025  | Interleukin 6 signal transducer                                           | Il6st                | 1.007  | 0.229 | 0.552  | 0.058 | 1.158  | 0.455 | 0.831  | 0.070 |
| 1373140_at   | AA851740  | Interleukin 6 signal transducer                                           | Il6st                | 1.247  | 0.327 | 0.850  | 0.083 | 1.333  | 0.200 | 1.215  | 0.401 |
| 1370957_at   | BM383427  | interleukin 6 signal transducer                                           | Il6st                | 0.988  | 0.953 | 1.619  | 0.334 | 1.363  | 0.698 | 1.457  | 0.437 |
| 1387366_at   | NM_053412 | interleukin enhancer binding factor 3                                     | Ilf3                 | 0.740  | 0.119 | 2.522  | 0.198 | 0.666  | 0.132 | 1.397  | 0.613 |
| 1383821_at   | AA899489  | Interleukin enhancer binding factor 3                                     | Ilf3                 | 0.830  | 0.189 | 0.825  | 0.312 | 0.645  | 0.575 | 0.764  | 0.195 |
| 1394933_at   | AI409647  | Interleukin enhancer binding factor 3                                     | Ilf3                 | 1.315  | 0.289 | 4.966  | 0.046 | 0.570  | 0.256 | 1.995  | 0.066 |
| 1375915_at   | AI073247  | interleukin-1 receptor-associated kinase 1 binding protein 1 (predicted)  | Irak1bp1_predicted   | 0.334  | 0.010 | 0.991  | 0.871 | 0.349  | 0.008 | 0.883  | 0.420 |
| 1383474_at   | BI274988  | interleukin-1 receptor-associated kinase 2                                | Irak2                | 3.548  | 0.021 | 3.009  | 0.000 | 3.567  | 0.045 | 1.340  | 0.005 |
| 1387226_at   | NM_019128 | internexin, alpha                                                         | Inexa                | 0.285  | 0.047 | 0.480  | 0.002 | 0.314  | 0.001 | 0.397  | 0.008 |
| 1378817_at   | AW434016  | intersectin 1                                                             | Itsn1                | 2.730  | 0.024 | 1.127  | 0.234 | 1.001  | 0.935 | 1.225  | 0.901 |
| 1382858_at   | BF397529  | intimal thickness-related receptor                                        | MGC94555             | 0.509  | 0.097 | 0.784  | 0.133 | 0.483  | 0.060 | 0.641  | 0.022 |
| 1372035_at   | BG381014  | Intraflagellar transport 52 homolog (Chlamydomonas) (predicted)           | Ift52_predicted      | 0.758  | 0.028 | 1.568  | 0.036 | 1.093  | 0.587 | 1.614  | 0.026 |
| 1380548_at   | BF420494  | intraflagellar transport 57 homolog (Chlamydomonas) (predicted)           | Ift57_predicted      | 1.295  | 0.090 | 3.718  | 0.001 | 2.390  | 0.021 | 4.007  | 0.007 |
| 1383876_at   | BG376705  | intraflagellar transport 74 homolog (Chlamydomonas)                       | Ift74                | 0.924  | 0.932 | 0.814  | 0.208 | 0.867  | 0.790 | 0.609  | 0.949 |
| 1390872_at   | AI178134  | Intraflagellar transport 80 homolog (Chlamydomonas)                       | Ift80                | 0.560  | 0.035 | 0.079  | 0.003 | 0.368  | 0.017 | 0.412  | 0.037 |
| 1391501_at   | AA851404  | intraflagellar transport 80 homolog (Chlamydomonas)                       | Ift80                | 0.993  | 0.301 | 0.691  | 0.064 | 0.996  | 0.847 | 0.762  | 0.050 |
| 1369433_at   | NM_021741 | IP63 protein                                                              | Ip63                 | 0.514  | 0.031 | 0.618  | 0.068 | 0.502  | 0.025 | 0.588  | 0.062 |
| 1390162_at   | AI234142  | IQ calmodulin-binding motif containing 1 (predicted)                      | Iqcb1_predicted      | 1.091  | 0.114 | 1.236  | 0.052 | 0.848  | 0.519 | 1.168  | 0.533 |
| 1391585_at   | AW253379  | ischemia related factor NYW-1                                             | Nyw1                 | 0.481  | 0.055 | 0.287  | 0.025 | 0.800  | 0.543 | 0.939  | 0.427 |
| 1374923_at   | BM386444  | ischemia related factor NYW-1                                             | Nyw1                 | 1.245  | 0.379 | 1.204  | 0.431 | 1.075  | 0.549 | 1.165  | 0.221 |
| 1386018_at   | AI176253  | Ischemia related factor NYW-1                                             | Nyw1                 | 1.497  | 0.776 | 1.827  | 0.815 | 1.578  | 0.218 | 2.174  | 0.393 |
| 1389578_at   | AA850740  | ischemia/reperfusion inducible protein                                    | Isrip                | 0.715  | 0.086 | 1.078  | 0.580 | 0.703  | 0.042 | 0.964  | 0.238 |
| 1369681_at   | NM_017339 | ISL1 transcription factor, LIM/homeodomain 1                              | Isl1                 | 0.534  | 0.055 | 0.136  | 0.022 | 0.308  | 0.045 | 0.292  | 0.012 |
| 1387660_at   | M25390    | islet amyloid polypeptide                                                 | Iapp                 | 0.865  | 0.553 | 0.485  | 0.004 | 0.850  | 0.316 | 0.601  | 0.013 |
| 1367787_at   | NM_030844 | islet cell autoantigen 1                                                  | Ica1                 | 0.460  | 0.010 | 0.529  | 0.010 | 0.426  | 0.032 | 0.621  | 0.001 |
| 1379339_at   | BM390448  | isochorismatase domain containing 1                                       | Isoc1                | 0.538  | 0.264 | 1.539  | 0.292 | 0.830  | 0.613 | 2.388  | 0.004 |
| 1372310_at   | AI227941  | isochorismatase domain containing 1                                       | Isoc1                | 0.684  | 0.495 | 0.624  | 0.002 | 0.626  | 0.104 | 0.883  | 0.059 |
| 1369954_at   | NM_031510 | isocitrate dehydrogenase 1 (NADP+), soluble                               | Idh1                 | 0.296  | 0.063 | 0.750  | 0.087 | 0.237  | 0.003 | 0.816  | 0.007 |
| 1370865_at   | BI277627  | isocitrate dehydrogenase 3 (NAD), gamma                                   | Idh3g                | 0.609  | 0.006 | 0.565  | 0.001 | 0.609  | 0.005 | 0.663  | 0.009 |
| 1367911_at   | NM_053638 | isocitrate dehydrogenase 3 (NAD+) alpha                                   | Idh3a                | 0.363  | 0.088 | 0.494  | 0.258 | 0.373  | 0.003 | 0.643  | 0.057 |
| 1388160_a_at | AI171793  | isocitrate dehydrogenase 3 (NAD+) beta                                    | Idh3B                | 0.671  | 0.689 | 1.303  | 0.122 | 0.738  | 0.016 | 1.387  | 0.000 |
| 1376418_a_at | AA859497  | isoleucine-tRNA synthetase (predicted)                                    | Iars_predicted       | 0.553  | 0.047 | 1.057  | 0.206 | 0.562  | 0.030 | 1.089  | 0.123 |
| 1380561_at   | BI287928  | isoleucine-tRNA synthetase 2, mitochondrial (predicted)                   | Iars2_predicted      | 0.981  | 0.874 | 0.421  | 0.006 | 0.824  | 0.163 | 0.501  | 0.012 |
| 1368878_at   | NM_053539 | isopentenyl-diphosphate delta isomerase                                   | Idi1                 | 0.537  | 0.232 | 0.597  | 0.000 | 0.521  | 0.167 | 0.444  | 0.006 |
| 1370232_at   | AI102838  | isovaleryl coenzyme A dehydrogenase                                       | Ivd                  | 0.810  | 0.250 | 0.848  | 0.040 | 0.858  | 0.219 | 0.844  | 0.186 |
| 1387905_at   | AB062135  | J domain protein 1                                                        | LOC619393            | 0.500  | 0.308 | 0.404  | 0.010 | 0.602  | 0.321 | 0.453  | 0.018 |
| 1368725_at   | NM_019147 | jagged 1                                                                  | Jag1                 | 1.381  | 0.178 | 4.895  | 0.001 | 1.728  | 0.048 | 5.248  | 0.000 |
| 1384060_at   | BG663208  | Janus kinase 1                                                            | Jak1                 | 1.307  | 0.326 | 3.713  | 0.004 | 0.967  | 0.248 | 3.375  | 0.010 |
| 1383478_at   | BG671504  | Janus kinase 1                                                            | Jak1                 | 1.062  | 0.702 | 2.708  | 0.001 | 0.977  | 0.941 | 2.742  | 0.001 |
| 1368856_at   | NM_031514 | Janus kinase 2                                                            | Jak2                 | 9.737  | 0.001 | 4.233  | 0.006 | 17.885 | 0.004 | 5.788  | 0.011 |
| 1368251_at   | NM_012855 | Janus kinase 3                                                            | Jak3                 | 1.463  | 0.043 | 0.990  | 0.954 | 3.240  | 0.000 | 1.526  | 0.022 |
| 1371983_at   | AA945181  | Josephin domain containing 1                                              | Josd1                | 0.484  | 0.831 | 0.491  | 0.011 | 0.312  | 0.016 | 0.420  | 0.009 |
| 1385109_at   | AA900775  | Josephin domain containing 3                                              | Josd3                | 0.778  | 0.023 | 2.322  | 0.014 | 1.160  | 0.915 | 1.438  | 0.016 |
| 1371498_at   | AI412685  | JTV1                                                                      | MGC125271            | 0.579  | 0.105 | 1.572  | 0.003 | 0.442  | 0.011 | 1.413  | 0.031 |
| 1370975_at   | AI172079  | jumonji domain containing 1A /// hypothetical gene supported by NM_175764 | Jmjd1a /// LOC497786 | 2.036  | 0.037 | 4.079  | 0.000 | 1.613  | 0.024 | 3.810  | 0.004 |
| 1388169_at   | BE102096  | jumonji domain containing 1C                                              | Jmjd1c               | 1.138  | 0.028 | 1.559  | 0.032 | 1.611  | 0.031 | 1.397  | 0.016 |
| 1383911_at   | AA924574  | jumonji domain containing 2C (predicted)                                  | Jmjd2c_predicted     | 1.094  | 0.093 | 1.868  | 0.000 | 1.731  | 0.069 | 1.472  | 0.001 |
| 1398811_at   | NM_019213 | jumping translocation breakpoint                                          | Jtb                  | 0.983  | 0.518 | 1.112  | 0.478 | 1.098  | 0.236 | 0.910  | 0.452 |
| 1393138_at   | BE329377  | Jun D proto-oncogene                                                      | Jund                 | 1.307  | 0.073 | 2.251  | 0.002 | 1.426  | 0.069 | 1.827  | 0.001 |
| 1369788_s_at | NM_021835 | Jun oncogene                                                              | Jun                  | 4.713  | 0.018 | 7.391  | 0.000 | 6.296  | 0.014 | 6.651  | 0.000 |

|              |           |                                                                           |                   |       |       |       |       |        |       |       |       |
|--------------|-----------|---------------------------------------------------------------------------|-------------------|-------|-------|-------|-------|--------|-------|-------|-------|
| 1389528_s_at | BI288619  | Jun oncogene                                                              | Jun               | 3.999 | 0.020 | 9.125 | 0.000 | 3.046  | 0.026 | 7.037 | 0.001 |
| 1374404_at   | BI288619  | Jun oncogene                                                              | Jun               | 2.175 | 0.139 | 4.952 | 0.008 | 2.441  | 0.112 | 2.763 | 0.011 |
| 1387061_at   | NM_031047 | junction plakoglobin                                                      | Jup               | 1.107 | 0.447 | 1.143 | 0.308 | 0.752  | 0.043 | 0.902 | 0.978 |
| 1381992_at   | AI145378  | kaptin (actin binding protein) (predicted)                                | Kptn_predicted    | 0.992 | 0.869 | 0.825 | 0.667 | 0.843  | 0.022 | 0.866 | 0.908 |
| 1377664_at   | AI101205  | KARP-1 binding protein 1                                                  | Kab               | 1.168 | 0.436 | 0.829 | 0.056 | 1.298  | 0.871 | 0.868 | 0.781 |
| 1372183_at   | AI230596  | Karyopherin (importin) alpha 1                                            | Kpna1             | 0.788 | 0.332 | 1.546 | 0.002 | 0.641  | 0.030 | 1.295 | 0.112 |
| 1382756_at   | AI101822  | karyopherin (importin) alpha 1                                            | Kpna1             | 0.762 | 0.418 | 1.918 | 0.003 | 0.563  | 0.007 | 1.186 | 0.066 |
| 1382251_at   | BE120157  | karyopherin (importin) alpha 1                                            | Kpna1             | 0.809 | 0.774 | 3.064 | 0.004 | 0.710  | 0.151 | 2.350 | 0.406 |
| 1367683_at   | NM_053483 | karyopherin (importin) alpha 2                                            | Kpna2             | 0.471 | 0.039 | 0.631 | 0.001 | 0.565  | 0.012 | 0.840 | 0.035 |
| 1373116_at   | AA945320  | Karyopherin (importin) alpha 3                                            | Kpna3             | 1.386 | 0.101 | 1.462 | 0.037 | 1.745  | 0.017 | 1.179 | 0.300 |
| 1389001_at   | AW433944  | Karyopherin (importin) alpha 4                                            | Kpna4             | 3.383 | 0.025 | 4.091 | 0.000 | 1.984  | 0.007 | 3.030 | 0.003 |
| 1368573_at   | NM_017063 | karyopherin (importin) beta 1                                             | Kpnb1             | 0.983 | 0.958 | 1.790 | 0.093 | 0.917  | 0.559 | 1.652 | 0.718 |
| 1391086_at   | BI302698  | katanin p60 (ATPase-containing) subunit A1                                | Katna1            | 1.388 | 0.284 | 1.479 | 0.040 | 1.312  | 0.098 | 1.436 | 0.002 |
| 1396656_at   | BF410595  | Katanin p60 subunit A-like 1                                              | Katna1            | 0.986 | 0.941 | 1.151 | 0.942 | 1.017  | 0.125 | 1.165 | 0.986 |
| 1373214_at   | AA945238  | KDEL (Lys-Asp-Glu-Leu) containing 1                                       | Kdelc1            | 0.723 | 0.297 | 0.832 | 0.713 | 0.535  | 0.629 | 0.796 | 0.336 |
| 1374704_at   | BM384752  | KDEL (Lys-Asp-Glu-Leu) containing 2                                       | Kdelc2            | 1.038 | 0.738 | 1.796 | 0.174 | 0.879  | 0.696 | 0.923 | 0.267 |
| 1371514_at   | BI278612  | KDEL (Lys-Asp-Glu-Leu) endoplasmic reticulum protein retention receptor 1 | Kdelr1            | 0.679 | 0.015 | 1.012 | 0.297 | 0.786  | 0.014 | 0.915 | 0.060 |
| 1377269_at   | BI288720  | KDEL (Lys-Asp-Glu-Leu) endoplasmic reticulum protein retention receptor 2 | Kdelr2            | 0.866 | 0.093 | 1.003 | 0.930 | 0.867  | 0.101 | 1.009 | 0.953 |
| 1371780_at   | AA850164  | KDEL (Lys-Asp-Glu-Leu) endoplasmic reticulum protein retention receptor 2 | Kdelr2            | 0.661 | 0.546 | 0.894 | 0.248 | 0.706  | 0.087 | 0.876 | 0.129 |
| 1393321_at   | AW525577  | kelch domain containing 1 (predicted)                                     | Klhdc1_predicted  | 0.850 | 0.973 | 1.022 | 0.869 | 1.004  | 0.989 | 0.930 | 0.920 |
| 1397716_at   | AI547852  | Kelch domain containing 2                                                 | Klhdc2            | 1.009 | 0.063 | 0.990 | 0.982 | 0.994  | 0.890 | 0.987 | 0.978 |
| 1374406_at   | AA925512  | kelch domain containing 2                                                 | Klhdc2            | 0.653 | 0.411 | 0.724 | 0.082 | 0.493  | 0.010 | 0.888 | 0.373 |
| 1371674_at   | AA894104  | kelch domain containing 3                                                 | Klhdc3            | 0.764 | 0.126 | 0.930 | 0.012 | 0.686  | 0.050 | 0.937 | 0.249 |
| 1388388_at   | AI179127  | Kelch domain containing 3                                                 | Klhdc3            | 0.970 | 0.937 | 1.551 | 0.179 | 0.891  | 0.087 | 1.234 | 0.044 |
| 1374983_at   | BI289414  | kelch domain containing 4 (predicted)                                     | Klhdc4_predicted  | 0.689 | 0.889 | 1.328 | 0.074 | 1.377  | 0.692 | 1.331 | 0.123 |
| 1382230_at   | BI296330  | kelch domain containing 8A                                                | Klhdc8a           | 0.607 | 0.042 | 0.656 | 0.039 | 0.608  | 0.122 | 0.918 | 0.289 |
| 1397746_at   | BG371972  | Kelch domain containing 8A                                                | Klhdc8a           | 0.990 | 0.114 | 0.999 | 0.965 | 0.982  | 0.817 | 1.002 | 0.921 |
| 1371685_at   | AI178043  | Kelch repeat and BTB (POZ) domain containing 2 (predicted)                | Kbtbd2_predicted  | 0.953 | 0.770 | 1.364 | 0.087 | 1.154  | 0.300 | 1.026 | 0.578 |
| 1396082_at   | BG668869  | kelch repeat and BTB (POZ) domain containing 3 (predicted)                | Kbtbd3_predicted  | 0.605 | 0.121 | 1.180 | 0.583 | 0.863  | 0.181 | 0.906 | 0.596 |
| 1374614_at   | BM385650  | kelch repeat and BTB (POZ) domain containing 4 (predicted)                | Kbtbd4_predicted  | 0.953 | 0.889 | 0.994 | 0.949 | 0.748  | 0.657 | 0.706 | 0.997 |
| 1390016_at   | BF415854  | Kelch repeat and BTB (POZ) domain containing 9 (predicted)                | Kbtbd9_predicted  | 1.002 | 0.993 | 0.985 | 0.906 | 1.001  | 0.989 | 0.998 | 0.968 |
| 1374835_at   | AA944485  | Kelch-like 12 (Drosophila)                                                | Klhl12            | 0.487 | 0.008 | 0.677 | 0.118 | 0.617  | 0.113 | 0.729 | 0.225 |
| 1378008_at   | BF417386  | Kelch-like 12 (Drosophila)                                                | Klhl12            | 0.924 | 0.475 | 0.542 | 0.047 | 0.949  | 0.802 | 0.599 | 0.010 |
| 1373484_at   | AI179828  | kelch-like 13 (Drosophila)                                                | Klhl13            | 0.463 | 0.033 | 0.515 | 0.057 | 1.145  | 0.626 | 0.633 | 0.145 |
| 1392446_at   | AI145435  | kelch-like 2, Mayven (Drosophila) (predicted)                             | Klhl2_predicted   | 0.710 | 0.005 | 0.624 | 0.001 | 0.825  | 0.237 | 0.749 | 0.145 |
| 1373884_at   | BI298657  | kelch-like 2, Mayven (Drosophila) (predicted)                             | Klhl2_predicted   | 1.006 | 0.756 | 0.895 | 0.045 | 1.003  | 0.112 | 0.992 | 0.216 |
| 1395182_at   | AI411008  | kelch-like 20 (Drosophila) (predicted)                                    | Klhl20_predicted  | 0.901 | 0.830 | 1.202 | 0.563 | 1.192  | 0.486 | 1.088 | 0.714 |
| 1389478_at   | BM392031  | kelch-like 22 (Drosophila) (predicted)                                    | Klhl22_predicted  | 0.428 | 0.002 | 1.001 | 0.375 | 0.207  | 0.000 | 1.019 | 0.477 |
| 1383300_at   | BF550390  | kelch-like 24 (Drosophila)                                                | Klhl24            | 1.220 | 0.091 | 0.955 | 0.790 | 0.970  | 0.896 | 0.999 | 0.660 |
| 1386611_at   | BG667175  | kelch-like 24 (Drosophila)                                                | Klhl24            | 1.076 | 0.580 | 1.371 | 0.006 | 0.818  | 0.603 | 1.402 | 0.136 |
| 1383110_at   | BM385908  | kelch-like 24 (Drosophila)                                                | Klhl24            | 1.152 | 0.605 | 1.183 | 0.765 | 0.950  | 0.853 | 1.206 | 0.166 |
| 1377209_at   | BI283664  | kelch-like 25 (Drosophila)                                                | Klhl25            | 0.644 | 0.019 | 1.002 | 0.974 | 0.655  | 0.035 | 0.999 | 0.311 |
| 1379258_at   | AA998367  | kelch-like 5 (Drosophila)                                                 | Klhl5             | 1.092 | 0.970 | 0.990 | 0.962 | 1.217  | 0.328 | 0.911 | 0.672 |
| 1388799_at   | BG374559  | kelch-like 7 (Drosophila)                                                 | Klhl7             | 0.683 | 0.003 | 0.511 | 0.002 | 0.630  | 0.028 | 0.558 | 0.003 |
| 1370066_at   | NM_057152 | Kelch-like ECH-associated protein 1                                       | Keap1             | 0.976 | 0.784 | 0.924 | 0.577 | 1.298  | 0.214 | 1.000 | 0.995 |
| 1379709_at   | AI599514  | keratin associated protein 14 (predicted)                                 | Krtap14_predicted | 1.400 | 0.797 | 1.091 | 0.078 | 0.734  | 0.132 | 1.077 | 0.955 |
| 1388155_at   | BI286012  | keratin complex 1, acidic, gene 18                                        | Krt1-18           | 1.118 | 0.539 | 2.531 | 0.005 | 0.708  | 0.151 | 1.888 | 0.007 |
| 1388433_at   | BI279605  | keratin complex 1, acidic, gene 19                                        | Krt1-19           | 9.174 | 0.021 | 7.014 | 0.000 | 13.845 | 0.034 | 8.531 | 0.001 |
| 1373900_at   | BI284344  | keratin complex 2, basic, gene 7                                          | Krt2-7            | 2.257 | 0.026 | 1.287 | 0.164 | 0.736  | 0.339 | 1.144 | 0.467 |
| 1371530_at   | BF281337  | keratin complex 2, basic, gene 8                                          | Krt2-8            | 1.795 | 0.036 | 2.736 | 0.001 | 1.123  | 0.071 | 2.326 | 0.003 |
| 1371540_at   | AI102711  | keratinocyte associated protein 2 (predicted)                             | Krtcap2_predicted | 0.746 | 0.543 | 0.976 | 0.346 | 0.654  | 0.079 | 0.933 | 0.572 |
| 1386896_at   | AF393783  | KH domain containing, RNA binding, signal transduction associated 1       | Khdrbs1           | 0.883 | 0.490 | 2.150 | 0.001 | 0.823  | 0.101 | 1.662 | 0.002 |
| 1398773_at   | NM_130405 | KH domain containing, RNA binding, signal transduction associated 1       | Khdrbs1           | 0.961 | 0.843 | 1.310 | 0.009 | 0.959  | 0.340 | 1.388 | 0.001 |
| 1387196_at   | NM_022249 | KH domain containing, RNA binding, signal transduction associated 3       | Khdrbs3           | 0.753 | 0.076 | 1.000 | 0.366 | 0.824  | 0.201 | 1.335 | 0.093 |
| 1376525_at   | BI296632  | KH-type splicing regulatory protein                                       | Khsrp             | 0.778 | 0.705 | 2.747 | 0.130 | 1.196  | 0.973 | 2.335 | 0.910 |
| 1375426_a_at | BI295086  | KH-type splicing regulatory protein                                       | Khsrp             | 1.030 | 0.861 | 1.058 | 0.598 | 0.975  | 0.868 | 1.165 | 0.382 |
| 1370592_at   | AB019693  | kidney expressed gene 1                                                   | Keg1              | 1.892 | 0.080 | 0.972 | 0.564 | 1.036  | 0.963 | 0.947 | 0.669 |
| 1371946_at   | BG373288  | kidney predominant protein NCU-G1                                         | RGD1303130        | 0.948 | 0.394 | 1.084 | 0.381 | 0.748  | 0.047 | 1.255 | 0.945 |
| 1378060_at   | BF399121  | Kin of IRRE like 3 (Drosophila) (predicted)                               | Kirrel3_predicted | 2.326 | 0.064 | 0.600 | 0.246 | 1.495  | 0.258 | 0.433 | 0.034 |
| 1384655_at   | AW142820  | kin of IRRE like 3 (Drosophila) (predicted)                               | Kirrel3_predicted | 0.448 | 0.196 | 0.513 | 0.002 | 0.370  | 0.243 | 0.629 | 0.116 |
| 1387864_at   | AI169232  | kinase D-interacting substance 220                                        | Kidins220         | 0.798 | 0.664 | 0.806 | 0.048 | 0.794  | 0.048 | 0.898 | 0.115 |

|              |           |                                                          |                  |        |       |        |       |        |       |        |       |
|--------------|-----------|----------------------------------------------------------|------------------|--------|-------|--------|-------|--------|-------|--------|-------|
| 1370886_a_at | AA944723  | kinesin 2                                                | Kns2             | 0.537  | 0.037 | 0.952  | 0.326 | 0.926  | 0.215 | 0.649  | 0.078 |
| 1399126_at   | AA964114  | kinesin 2                                                | Kns2             | 1.115  | 0.920 | 1.092  | 0.196 | 1.159  | 0.397 | 1.039  | 0.953 |
| 1391611_at   | BI296819  | kinesin family member 12                                 | Kif12            | 0.888  | 0.164 | 0.656  | 0.011 | 0.845  | 0.230 | 0.635  | 0.036 |
| 1392197_at   | BF392518  | Kinesin family member 13A (predicted)                    | Kif13a_predicted | 1.002  | 0.301 | 0.995  | 0.970 | 1.004  | 0.984 | 1.000  | 0.997 |
| 1396255_at   | BF420465  | kinesin family member 16B (predicted)                    | Kif16b_predicted | 1.290  | 0.482 | 0.952  | 0.962 | 1.003  | 0.947 | 0.957  | 0.768 |
| 1378138_at   | BI296233  | kinesin family member 16B (predicted)                    | Kif16b_predicted | 1.156  | 0.547 | 0.995  | 0.973 | 1.650  | 0.116 | 0.931  | 0.975 |
| 1394535_at   | BF397930  | kinesin family member 16B (predicted)                    | Kif16b_predicted | 0.394  | 0.564 | 1.090  | 0.457 | 0.818  | 0.339 | 0.703  | 0.159 |
| 1384133_at   | BF522755  | kinesin family member 1A                                 | Kif1a            | 0.610  | 0.009 | 0.955  | 0.837 | 0.413  | 0.019 | 0.812  | 0.307 |
| 1388670_at   | BI286860  | Kinesin family member 1A                                 | Kif1a            | 0.611  | 0.032 | 0.652  | 0.028 | 0.447  | 0.002 | 0.668  | 0.035 |
| 1382785_at   | BE105549  | kinesin family member 1A                                 | Kif1a            | 0.743  | 0.248 | 10.533 | 0.001 | 0.773  | 0.233 | 6.889  | 0.004 |
| 1397505_at   | BE115743  | kinesin family member 1A                                 | Kif1a            | 0.598  | 0.413 | 0.815  | 0.835 | 0.499  | 0.155 | 0.618  | 0.030 |
| 1391906_at   | BE113001  | kinesin family member 1B                                 | Kif1b            | 1.000  | 0.322 | 0.913  | 0.418 | 0.671  | 0.817 | 1.256  | 0.335 |
| 1376005_at   | BE109334  | Kinesin family member 1B                                 | Kif1b            | 0.764  | 0.745 | 1.094  | 0.458 | 0.887  | 0.227 | 1.372  | 0.248 |
| 1392717_at   | BE109171  | Kinesin family member 1B                                 | Kif1b            | 0.918  | 0.811 | 1.660  | 0.315 | 1.357  | 0.935 | 1.083  | 0.675 |
| 1388034_at   | AB070355  | kinesin family member 1B                                 | Kif1b            | 1.015  | 0.967 | 1.832  | 0.073 | 1.088  | 0.366 | 1.181  | 0.613 |
| 1373722_at   | BE111697  | kinesin family member 20A (predicted)                    | Kif20a_predicted | 0.666  | 0.101 | 0.474  | 0.022 | 0.566  | 0.010 | 0.518  | 0.003 |
| 1378186_at   | BF408466  | Kinesin family member 21A (predicted)                    | Kif21a_predicted | 0.830  | 0.285 | 0.993  | 0.979 | 0.820  | 0.951 | 1.004  | 0.593 |
| 1381976_at   | BE103004  | kinesin family member 21A (predicted)                    | Kif21a_predicted | 1.058  | 0.718 | 0.779  | 0.194 | 1.624  | 0.091 | 0.927  | 0.244 |
| 1372516_at   | AI317842  | kinesin family member 22                                 | Kif22            | 0.401  | 0.000 | 0.884  | 0.183 | 0.393  | 0.001 | 0.823  | 0.592 |
| 1377025_at   | BF563503  | kinesin family member 3a                                 | Kif3a            | 1.540  | 0.076 | 2.244  | 0.085 | 0.988  | 0.301 | 0.986  | 0.924 |
| 1374428_at   | BI300933  | kinesin family member 3B (predicted)                     | Kif3b_predicted  | 1.061  | 0.988 | 1.202  | 0.285 | 1.990  | 0.068 | 1.099  | 0.151 |
| 1369637_at   | NM_053486 | kinesin family member 3C                                 | Kif3c            | 1.573  | 0.032 | 1.200  | 0.079 | 2.419  | 0.008 | 1.126  | 0.881 |
| 1386707_at   | BF553488  | Kinesin family member 3C                                 | Kif3c            | 0.844  | 0.486 | 0.980  | 0.731 | 1.917  | 0.024 | 0.809  | 0.448 |
| 1378096_at   | AA924572  | kinesin family member 5B                                 | Kif5b            | 1.034  | 0.567 | 3.683  | 0.053 | 0.946  | 0.592 | 1.416  | 0.103 |
| 1380206_at   | BE096005  | Kinesin family member 5C (predicted)                     | Kif5c_predicted  | 0.723  | 0.104 | 0.368  | 0.029 | 0.804  | 0.094 | 0.344  | 0.039 |
| 1380172_at   | BE104278  | kinesin family member 5C (predicted)                     | Kif5c_predicted  | 0.582  | 0.211 | 0.419  | 0.000 | 0.426  | 0.003 | 0.325  | 0.004 |
| 1373977_at   | BE108253  | Kinesin family member 5C (predicted)                     | Kif5c_predicted  | 0.663  | 0.278 | 0.386  | 0.011 | 0.397  | 0.004 | 0.486  | 0.033 |
| 1395997_at   | BF392893  | Kinesin family member 5C (predicted)                     | Kif5c_predicted  | 0.867  | 0.937 | 1.463  | 0.226 | 0.824  | 0.027 | 0.815  | 0.335 |
| 1372376_at   | BF408879  | kinesin family member 9 (predicted)                      | Kif9_predicted   | 1.862  | 0.162 | 2.591  | 0.009 | 1.787  | 0.032 | 1.742  | 0.019 |
| 1397163_s_at | BM392082  | Kinesin family member 9 (predicted)                      | Kif9_predicted   | 1.936  | 0.901 | 0.825  | 0.952 | 1.121  | 0.612 | 0.848  | 0.523 |
| 1391697_at   | BM392082  | Kinesin family member 9 (predicted)                      | Kif9_predicted   | 1.292  | 0.985 | 1.062  | 0.815 | 1.039  | 0.587 | 1.000  | 0.708 |
| 1378197_at   | AW433953  | kinesin family member C2                                 | KIFC2            | 0.570  | 0.678 | 0.326  | 0.025 | 0.525  | 0.263 | 0.361  | 0.014 |
| 1371125_at   | BF564995  | kinesin heavy chain family, member 2                     | Kif2             | 1.108  | 0.419 | 1.259  | 0.441 | 1.066  | 0.351 | 1.634  | 0.070 |
| 1383156_at   | H31899    | kinesin heavy chain family, member 2                     | Kif2             | 1.546  | 0.785 | 1.502  | 0.606 | 0.462  | 0.024 | 2.303  | 0.080 |
| 1389593_at   | BM392287  | Kinesin heavy chain family, member 2                     | Kif2             | 0.908  | 0.800 | 0.193  | 0.000 | 0.696  | 0.946 | 0.196  | 0.010 |
| 1373125_at   | AW915749  | kinesin light chain 2 (predicted)                        | Klc2_predicted   | 1.079  | 0.498 | 1.161  | 0.047 | 0.889  | 0.935 | 1.275  | 0.112 |
| 1372328_at   | BM386079  | kinesin light chain 4                                    | Klc4             | 0.881  | 0.002 | 1.281  | 0.171 | 1.008  | 0.922 | 0.943  | 0.717 |
| 1374462_at   | AA850935  | kinesin-associated protein 3 (predicted)                 | Kifap3_predicted | 0.860  | 0.077 | 0.953  | 0.514 | 0.853  | 0.027 | 1.110  | 0.341 |
| 1391618_at   | AI227800  | kinesin-associated protein 3 (predicted)                 | Kifap3_predicted | 0.937  | 0.228 | 0.875  | 0.024 | 1.065  | 0.252 | 0.379  | 0.050 |
| 1397106_at   | BE101327  | KRAB box containing zinc finger protein                  | Krim1            | 1.651  | 0.504 | 1.164  | 0.727 | 0.767  | 0.305 | 1.005  | 0.984 |
| 1368650_at   | NM_031135 | Kruppel-like factor 10                                   | Klf10            | 2.055  | 0.146 | 0.739  | 0.299 | 1.943  | 0.041 | 0.920  | 0.301 |
| 1368249_at   | NM_053536 | Kruppel-like factor 15                                   | Klf15            | 1.014  | 0.761 | 2.075  | 0.058 | 1.011  | 0.943 | 1.019  | 0.610 |
| 1374231_at   | AI103472  | Kruppel-like factor 16 (predicted)                       | Klf16_predicted  | 1.094  | 0.727 | 2.328  | 0.008 | 0.621  | 0.031 | 1.874  | 0.074 |
| 1375248_at   | BI294916  | Kruppel-like factor 2 (lung) (predicted)                 | Klf2_predicted   | 1.014  | 0.990 | 1.005  | 0.847 | 0.985  | 0.999 | 1.013  | 0.929 |
| 1393150_at   | BF562149  | Kruppel-like factor 3 (basic) (mapped)                   | Klf3_mapped      | 1.500  | 0.132 | 2.067  | 0.051 | 1.013  | 0.581 | 1.040  | 0.837 |
| 1387260_at   | NM_053713 | Kruppel-like factor 4 (gut)                              | Klf4             | 1.542  | 0.259 | 1.537  | 0.091 | 1.125  | 0.128 | 1.140  | 0.268 |
| 1394039_at   | BM382886  | Kruppel-like factor 5                                    | Klf5             | 14.598 | 0.000 | 15.032 | 0.000 | 17.794 | 0.000 | 17.546 | 0.000 |
| 1385961_at   | BF561079  | Kruppel-like factor 5                                    | Klf5             | 13.909 | 0.000 | 11.562 | 0.000 | 16.864 | 0.000 | 11.264 | 0.000 |
| 1368363_at   | NM_053394 | Kruppel-like factor 5                                    | Klf5             | 12.302 | 0.031 | 9.084  | 0.018 | 8.849  | 0.005 | 1.546  | 0.015 |
| 1387060_at   | NM_031642 | Kruppel-like factor 6                                    | Klf6             | 8.126  | 0.001 | 16.152 | 0.001 | 5.932  | 0.001 | 4.080  | 0.006 |
| 1391471_at   | BE116100  | Kruppel-like factor 7 (ubiquitous) (predicted)           | Klf7_predicted   | 1.247  | 0.245 | 2.255  | 0.069 | 2.141  | 0.013 | 1.131  | 0.550 |
| 1370209_at   | BE101336  | Kruppel-like factor 9                                    | Klf9             | 1.186  | 0.128 | 2.140  | 0.004 | 1.081  | 0.934 | 1.655  | 0.017 |
| 1375341_at   | BG664807  | Kua homolog (predicted)                                  | Kua_predicted    | 1.002  | 0.968 | 1.064  | 0.671 | 1.019  | 0.978 | 1.063  | 0.357 |
| 1374006_at   | BI295878  | kynurenine aminotransferase III                          | Kat3             | 2.391  | 0.016 | 0.995  | 0.691 | 3.407  | 0.015 | 2.143  | 0.003 |
| 1373702_at   | AI171798  | l(3)mbt-like 2 (Drosophila)                              | L3mbtl2          | 1.218  | 0.069 | 1.364  | 0.051 | 1.285  | 0.256 | 1.338  | 0.015 |
| 1370237_at   | AA799574  | L-3-hydroxyacyl-Coenzyme A dehydrogenase, short chain    | Hadhsc           | 0.205  | 0.020 | 0.125  | 0.001 | 0.197  | 0.003 | 0.157  | 0.007 |
| 1389922_at   | AA891362  | L-3-hydroxyacyl-Coenzyme A dehydrogenase, short chain    | Hadhsc           | 0.310  | 0.075 | 0.124  | 0.002 | 0.287  | 0.067 | 0.104  | 0.000 |
| 1392746_x_at | BF394189  | La ribonucleoprotein domain family, member 1 (predicted) | Larp1_predicted  | 1.502  | 0.002 | 1.538  | 0.098 | 1.364  | 0.002 | 1.532  | 0.024 |
| 1382670_at   | BF394189  | La ribonucleoprotein domain family, member 1 (predicted) | Larp1_predicted  | 1.469  | 0.022 | 1.350  | 0.149 | 1.100  | 0.284 | 1.366  | 0.000 |
| 1390113_a_at | BI300539  | La ribonucleoprotein domain family, member 1 (predicted) | Larp1_predicted  | 1.394  | 0.071 | 1.642  | 0.021 | 1.690  | 0.139 | 1.831  | 0.011 |
| 1389551_at   | AI008160  | lactamase, beta 2                                        | Lactb2           | 0.926  | 0.624 | 4.289  | 0.032 | 0.463  | 0.164 | 4.750  | 0.061 |

|              |           |                                                                               |                   |        |       |        |       |        |       |        |       |
|--------------|-----------|-------------------------------------------------------------------------------|-------------------|--------|-------|--------|-------|--------|-------|--------|-------|
| 1367586_at   | NM_017025 | lactate dehydrogenase A                                                       | Ldha              | 0.339  | 0.081 | 2.384  | 0.321 | 0.456  | 0.048 | 2.117  | 0.532 |
| 1370218_at   | AA848319  | lactate dehydrogenase B                                                       | Ldhb              | 0.298  | 0.000 | 0.479  | 0.032 | 0.235  | 0.000 | 0.456  | 0.020 |
| 1382061_at   | AI501131  | lactate dehydrogenase D                                                       | Ldhd              | 0.919  | 0.763 | 1.214  | 0.117 | 0.939  | 0.946 | 1.150  | 0.153 |
| 1374195_at   | AA799544  | ladinin (predicted)                                                           | Lad1_predicted    | 1.287  | 0.027 | 6.343  | 0.018 | 0.771  | 0.317 | 2.872  | 0.003 |
| 1377289_at   | BF393969  | ladybird homeobox 1 homolog (Drosophila) corepressor 1 (predicted)            | Lbxcor1_predicted | 1.139  | 0.306 | 1.022  | 0.989 | 2.208  | 0.036 | 2.314  | 0.086 |
| 1379340_at   | BM385282  | lamimin, gamma 2                                                              | Lamc2             | 14.205 | 0.001 | 28.303 | 0.002 | 13.586 | 0.003 | 27.167 | 0.004 |
| 1379889_at   | AW527269  | lamimin, gamma 2                                                              | Lamc2             | 3.363  | 0.040 | 1.626  | 0.293 | 2.202  | 0.270 | 2.180  | 0.175 |
| 1368054_at   | NM_021755 | lamin A                                                                       | Lmna              | 1.626  | 0.198 | 1.426  | 0.135 | 0.951  | 0.507 | 1.047  | 0.286 |
| 1368055_a_at | BI282866  | lamin A                                                                       | Lmna              | 1.912  | 0.201 | 4.375  | 0.005 | 0.780  | 0.283 | 2.248  | 0.015 |
| 1392926_at   | BI281952  | laminin, alpha 1 (predicted)                                                  | Lama1_predicted   | 1.001  | 0.873 | 1.000  | 0.571 | 1.002  | 0.863 | 0.919  | 0.540 |
| 1370538_at   | U61261    | laminin, alpha 3                                                              | Lama3             | 1.049  | 0.902 | 1.607  | 0.050 | 1.509  | 0.617 | 1.937  | 0.204 |
| 1388932_at   | BI274917  | laminin, alpha 5                                                              | Lama5             | 0.995  | 0.885 | 1.000  | 0.690 | 0.993  | 0.791 | 0.995  | 0.543 |
| 1391022_at   | BE101834  | laminin, beta 3                                                               | Lamb3             | 0.880  | 0.910 | 1.139  | 0.545 | 1.004  | 0.947 | 1.115  | 0.286 |
| 1371322_at   | BI275624  | Laminin, gamma 1                                                              | Lamc1             | 2.409  | 0.056 | 2.325  | 0.005 | 1.045  | 0.754 | 2.345  | 0.042 |
| 1385064_at   | BM384729  | L-amino acid oxidase 1 (predicted)                                            | Lao1_predicted    | 1.001  | 0.999 | 1.193  | 0.250 | 1.494  | 0.195 | 1.380  | 0.010 |
| 1374196_at   | AI710389  | lanC (bacterial lantibiotic synthetase component C)-like 1                    | Lanc1             | 0.471  | 0.001 | 0.640  | 0.010 | 0.597  | 0.036 | 0.546  | 0.049 |
| 1395354_at   | BF549735  | lanC (bacterial lantibiotic synthetase component C)-like 1                    | Lanc1             | 0.998  | 0.989 | 0.963  | 0.461 | 0.999  | 0.999 | 0.953  | 0.889 |
| 1389257_at   | BI288578  | LanC (bacterial lantibiotic synthetase component C)-like 2 (predicted)        | Lanc2_predicted   | 0.567  | 0.590 | 0.530  | 0.001 | 0.653  | 0.238 | 0.559  | 0.011 |
| 1372973_at   | BM390574  | Lanosterol synthase                                                           | Lss               | 1.059  | 0.657 | 0.962  | 0.128 | 1.246  | 0.281 | 0.683  | 0.154 |
| 1391565_at   | AA899663  | large subunit GTPase 1 homolog (S. cerevisiae)                                | Lsg1              | 0.261  | 0.002 | 0.120  | 0.000 | 0.188  | 0.001 | 0.153  | 0.001 |
| 1373293_at   | BM392010  | large subunit GTPase 1 homolog (S. cerevisiae)                                | Lsg1              | 0.817  | 0.411 | 1.201  | 0.134 | 0.704  | 0.028 | 0.794  | 0.107 |
| 1398770_at   | NM_031105 | large subunit ribosomal protein L36a                                          | Rpl36a            | 0.856  | 0.449 | 0.976  | 0.309 | 0.793  | 0.017 | 0.825  | 0.888 |
| 1373552_at   | AW531852  | LAS1-like (S. cerevisiae) (predicted)                                         | Las1l_predicted   | 0.798  | 0.194 | 1.219  | 0.180 | 0.816  | 0.277 | 1.053  | 0.106 |
| 1367912_at   | NM_021587 | latent transforming growth factor beta binding protein 1                      | Ltbp1             | 1.062  | 0.887 | 1.197  | 0.993 | 1.706  | 0.074 | 1.161  | 0.336 |
| 1367768_at   | NM_031655 | latexin                                                                       | Lxn               | 2.403  | 0.028 | 1.624  | 0.027 | 2.090  | 0.075 | 1.575  | 0.011 |
| 1369644_at   | NM_134408 | latrophilin 2                                                                 | Lphn2             | 0.666  | 0.811 | 1.017  | 0.980 | 0.927  | 0.989 | 1.336  | 0.691 |
| 1386879_at   | NM_031832 | lectin, galactose binding, soluble 3                                          | Lgals3            | 3.427  | 0.002 | 7.189  | 0.009 | 0.969  | 0.203 | 5.814  | 0.012 |
| 1369716_s_at | NM_012976 | lectin, galactose binding, soluble 5 /// lectin, galactose binding, soluble 9 | Lgals5 /// Lgals9 | 6.368  | 0.016 | 6.894  | 0.000 | 15.349 | 0.000 | 25.147 | 0.005 |
| 1387027_a_at | U72741    | lectin, galactose binding, soluble 9                                          | Lgals9            | 2.343  | 0.100 | 5.273  | 0.016 | 3.325  | 0.002 | 8.195  | 0.008 |
| 1368960_at   | NM_053862 | lectin, galactoside-binding, soluble 8                                        | Lgals8            | 1.160  | 0.074 | 3.876  | 0.001 | 1.249  | 0.055 | 2.569  | 0.004 |
| 1389329_at   | AI411914  | lectin, galactoside-binding, soluble 8                                        | Lgals8            | 1.015  | 0.724 | 1.505  | 0.006 | 1.273  | 0.012 | 1.500  | 0.010 |
| 1387946_at   | AF065438  | lectin, galactoside-binding, soluble, 3 binding protein                       | Lgals3bp          | 8.541  | 0.007 | 5.455  | 0.000 | 14.629 | 0.008 | 10.277 | 0.000 |
| 1378437_at   | BM385012  | Lectin, mannose-binding 2 (predicted)                                         | Lman2_predicted   | 0.877  | 0.393 | 1.292  | 0.410 | 1.019  | 0.654 | 0.961  | 0.887 |
| 1373815_at   | BI304064  | lectin, mannose-binding 2 (predicted)                                         | Lman2_predicted   | 0.717  | 0.428 | 1.487  | 0.052 | 0.615  | 0.058 | 1.244  | 0.129 |
| 1394716_at   | AI011137  | Lectin, mannose-binding 2-like (predicted)                                    | Lman2l_predicted  | 1.501  | 0.074 | 2.006  | 0.023 | 0.386  | 0.002 | 1.294  | 0.102 |
| 1389027_at   | BF284714  | Lectin, mannose-binding 2-like (predicted)                                    | Lman2l_predicted  | 0.591  | 0.216 | 1.036  | 0.163 | 0.746  | 0.026 | 0.932  | 0.280 |
| 1368848_at   | NM_053886 | lectin, mannose-binding, 1                                                    | Lman1             | 0.596  | 0.088 | 0.747  | 0.107 | 0.493  | 0.037 | 0.525  | 0.004 |
| 1368430_at   | AF154349  | legumain                                                                      | Lgmn              | 1.331  | 0.224 | 1.289  | 0.003 | 1.233  | 0.205 | 1.313  | 0.005 |
| 1399136_at   | BE103179  | LEM domain containing 2                                                       | Lemd2             | 0.889  | 0.837 | 1.595  | 0.062 | 1.134  | 0.262 | 1.260  | 0.495 |
| 1371832_at   | AW526333  | Leo1, Paf1/RNA polymerase II complex component, homolog (S. cerevisiae)       | Leo1              | 0.961  | 0.957 | 0.718  | 0.288 | 0.363  | 0.032 | 0.676  | 0.052 |
| 1367967_at   | NM_053667 | leprecan 1                                                                    | Lepre1            | 0.640  | 0.077 | 0.976  | 0.959 | 0.641  | 0.078 | 0.997  | 0.993 |
| 1373750_at   | BF406832  | leprecan-like 2 (predicted)                                                   | Lepre2_predicted  | 0.936  | 0.875 | 0.613  | 0.007 | 0.924  | 0.871 | 0.671  | 0.014 |
| 1388725_at   | AA892288  | leptin receptor overlapping transcript                                        | Leprot            | 0.702  | 0.016 | 1.102  | 0.697 | 0.676  | 0.249 | 1.558  | 0.124 |
| 1369323_at   | NM_020099 | leptin receptor overlapping transcript                                        | Leprot            | 0.922  | 0.631 | 0.997  | 0.376 | 0.899  | 0.109 | 1.496  | 0.084 |
| 1376579_at   | AA945172  | leucine aminopeptidase 3                                                      | Lap3              | 1.010  | 0.921 | 1.206  | 0.340 | 1.228  | 0.103 | 0.999  | 0.307 |
| 1388747_at   | BG381002  | leucine carboxyl methyltransferase 1                                          | Lcmt1             | 0.741  | 0.050 | 1.122  | 0.299 | 0.708  | 0.284 | 1.065  | 0.703 |
| 1379282_at   | AI145899  | leucine rich repeat (in FLII) interacting protein 2                           | Lrrfip2           | 0.945  | 0.998 | 2.006  | 0.001 | 0.803  | 0.520 | 1.436  | 0.074 |
| 1397937_at   | BF409772  | Leucine rich repeat containing 35                                             | Lrrc35            | 0.789  | 0.112 | 0.746  | 0.050 | 0.916  | 0.613 | 1.047  | 0.647 |
| 1372784_at   | BM386669  | leucine rich repeat containing 41                                             | Lrrc41            | 0.764  | 0.290 | 1.119  | 0.348 | 0.519  | 0.046 | 0.937  | 0.249 |
| 1371879_at   | BE110542  | leucine rich repeat containing 42                                             | Lrrc42            | 3.037  | 0.069 | 1.626  | 0.131 | 3.445  | 0.038 | 1.353  | 0.282 |
| 1373404_at   | AI170354  | Leucine rich repeat containing 46                                             | Lrrc46            | 1.086  | 0.827 | 1.030  | 0.149 | 0.931  | 0.471 | 0.996  | 0.483 |
| 1375076_at   | AI112007  | leucine rich repeat containing 46                                             | Lrrc46            | 1.023  | 0.992 | 1.007  | 0.655 | 0.975  | 0.513 | 1.001  | 0.984 |
| 1382479_at   | AI029670  | leucine rich repeat containing 4C (predicted)                                 | Lrrc4c_predicted  | 1.039  | 0.615 | 0.763  | 0.617 | 0.998  | 0.140 | 0.771  | 0.300 |
| 1371445_at   | BF285649  | leucine rich repeat containing 59                                             | Lrrc59            | 0.738  | 0.467 | 1.759  | 0.000 | 0.803  | 0.325 | 1.693  | 0.003 |
| 1373431_at   | AI101427  | leucine rich repeat containing 8 family, member D                             | Lrrc8d            | 1.676  | 0.003 | 1.215  | 0.090 | 1.317  | 0.042 | 1.009  | 0.804 |
| 1391601_at   | AA964579  | leucine rich repeat protein 2, neuronal (predicted)                           | Lrrn2_predicted   | 0.331  | 0.002 | 0.268  | 0.001 | 0.337  | 0.010 | 0.296  | 0.006 |
| 1392023_at   | AW434002  | Leucine zipper and CTNNBIP1 domain containing                                 | Lzic              | 0.956  | 0.495 | 0.893  | 0.213 | 0.957  | 0.503 | 1.130  | 0.427 |
| 1383132_at   | BG377939  | leucine zipper and CTNNBIP1 domain containing                                 | Lzic              | 1.127  | 0.654 | 1.513  | 0.006 | 0.971  | 0.990 | 0.952  | 0.672 |
| 1376957_at   | AI178922  | leucine zipper and CTNNBIP1 domain containing                                 | Lzic              | 1.004  | 0.987 | 0.997  | 0.987 | 0.415  | 0.983 | 0.999  | 0.996 |
| 1372260_at   | BI296304  | leucine zipper domain protein                                                 | MGC116147         | 0.931  | 0.403 | 0.737  | 0.001 | 1.557  | 0.076 | 1.304  | 0.078 |
| 1375894_at   | AI716087  | leucine zipper transcription factor-like 1                                    | Lztf1             | 0.436  | 0.021 | 0.371  | 0.102 | 0.280  | 0.056 | 0.537  | 0.228 |

|              |           |                                                                                  |                                 |         |       |          |       |        |       |        |       |
|--------------|-----------|----------------------------------------------------------------------------------|---------------------------------|---------|-------|----------|-------|--------|-------|--------|-------|
| 1387209_at   | NM_053571 | leucine zipper transcription regulator 2                                         | Lztr2                           | 1.122   | 0.397 | 0.460    | 0.083 | 1.094  | 0.902 | 0.834  | 0.187 |
| 1377171_at   | AA875041  | leucine zipper, putative tumor suppressor 1                                      | Lzts1                           | 0.883   | 0.529 | 1.247    | 0.958 | 0.945  | 0.333 | 1.378  | 0.021 |
| 1389190_at   | BM392076  | leucine zipper, putative tumor suppressor 2                                      | Lzts2                           | 1.000   | 0.966 | 1.002    | 0.959 | 1.001  | 1.000 | 1.102  | 0.452 |
| 1396013_at   | BI293141  | leucine zipper-EF-hand containing transmembrane protein 1                        | Letm1                           | 0.795   | 0.314 | 2.120    | 0.032 | 0.820  | 0.259 | 1.858  | 0.013 |
| 1392273_at   | BF402258  | leucine zipper-EF-hand containing transmembrane protein 2                        | Letm2                           | 1.095   | 0.334 | 0.463    | 0.026 | 1.104  | 0.937 | 0.817  | 0.032 |
| 1380128_at   | AI237408  | Leucine zipper-EF-hand containing transmembrane protein 2                        | Letm2                           | 0.786   | 0.898 | 0.297    | 0.204 | 1.087  | 0.797 | 0.890  | 0.765 |
| 1398569_at   | BF412229  | Leucine-rich and death domain containing (predicted)                             | Lrdd_predicted                  | 0.998   | 0.950 | 2.427    | 0.008 | 1.305  | 0.148 | 2.219  | 0.019 |
| 1373500_at   | BI294727  | leucine-rich PPR-motif containing                                                | Lrpprc                          | 0.440   | 0.007 | 1.273    | 0.269 | 0.475  | 0.001 | 0.979  | 0.751 |
| 1398209_at   | BF413358  | Leucine-rich PPR-motif containing                                                | Lrpprc                          | 1.214   | 0.982 | 1.289    | 0.454 | 1.070  | 0.784 | 1.057  | 0.877 |
| 1383459_at   | AI764525  | leucine-rich repeat LGI family, member 3 (predicted)                             | Lgi3_predicted                  | 1.939   | 0.032 | 1.132    | 0.237 | 1.108  | 0.204 | 0.986  | 0.690 |
| 1382920_at   | AA875002  | leucine-rich repeat-containing 8                                                 | Lrrc8                           | 0.928   | 0.115 | 0.735    | 0.343 | 0.899  | 0.024 | 0.863  | 0.089 |
| 1374296_at   | BM387574  | Leucine-rich repeat-containing 8                                                 | Lrrc8                           | 0.748   | 0.990 | 0.399    | 0.012 | 0.495  | 0.046 | 0.513  | 0.004 |
| 1388104_at   | BI300274  | leucine-rich repeat-containing G protein-coupled receptor 4                      | Lgr4                            | 0.893   | 0.074 | 1.702    | 0.044 | 1.001  | 0.603 | 0.955  | 0.563 |
| 1396947_at   | BF404382  | Leucine-rich repeat-containing G protein-coupled receptor 4                      | Lgr4                            | 1.010   | 0.372 | 1.697    | 0.277 | 0.778  | 0.093 | 1.286  | 0.503 |
| 1397503_at   | AI555886  | Leucine-rich repeats and calponin homology (CH) domain containing 3 (predicted)  | Lrch3_predicted                 | 2.047   | 0.042 | 1.652    | 0.270 | 2.322  | 0.065 | 1.677  | 0.282 |
| 1380049_at   | AI599448  | Leucine-rich repeats and calponin homology (CH) domain containing 3 (predicted)  | Lrch3_predicted                 | 1.768   | 0.240 | 0.765    | 0.052 | 1.989  | 0.002 | 0.710  | 0.034 |
| 1374847_at   | AI177438  | leucine-zipper-like transcriptional regulator, 1 (predicted)                     | Lztr1_predicted                 | 0.917   | 0.659 | 0.643    | 0.037 | 0.811  | 0.546 | 0.625  | 0.042 |
| 1395018_at   | BE119004  | leucyl-tRNA synthetase                                                           | Lars                            | 1.340   | 0.265 | 0.863    | 0.230 | 1.507  | 0.279 | 0.967  | 0.541 |
| 1374118_at   | AA944176  | leucyl-tRNA synthetase                                                           | Lars                            | 1.062   | 0.571 | 1.297    | 0.014 | 1.149  | 0.315 | 1.203  | 0.060 |
| 1390365_at   | BI296415  | leukocyte receptor cluster (LRC) member 1 (predicted)                            | Leng1_predicted                 | 1.003   | 0.979 | 1.210    | 0.145 | 1.007  | 1.000 | 1.074  | 0.317 |
| 1372680_at   | AI406310  | Leukocyte receptor cluster (LRC) member 4 (predicted)                            | Leng4_predicted                 | 1.102   | 0.261 | 0.828    | 0.412 | 1.690  | 0.046 | 0.966  | 0.808 |
| 1392932_at   | BI279191  | leukocyte receptor cluster (LRC) member 8                                        | Leng8                           | 0.687   | 0.008 | 0.488    | 0.004 | 1.240  | 0.663 | 0.642  | 0.070 |
| 1389010_at   | AW918009  | leukotriene A4 hydrolase                                                         | Lta4h                           | 0.399   | 0.102 | 0.469    | 0.025 | 0.205  | 0.022 | 0.940  | 0.325 |
| 1388102_at   | U66322    | leukotriene B4 12-hydroxydehydrogenase                                           | Ltb4dh                          | 1.005   | 0.509 | 0.989    | 0.902 | 1.229  | 0.825 | 0.992  | 0.957 |
| 1387438_at   | NM_053639 | leukotriene C4 synthase                                                          | Ltc4s                           | 1.002   | 0.832 | 0.999    | 0.352 | 1.002  | 1.000 | 1.000  | 0.484 |
| 1378633_at   | BE106297  | leupaxin                                                                         | Lpxn                            | 1.552   | 0.009 | 0.658    | 0.148 | 0.651  | 0.171 | 0.462  | 0.028 |
| 1391155_at   | AW528765  | Ligand of numb-protein X 1 (predicted)                                           | Lnx1_predicted                  | 0.711   | 0.346 | 0.201    | 0.005 | 0.699  | 0.067 | 0.200  | 0.012 |
| 1368204_at   | NM_030855 | ligase I, DNA, ATP-dependent                                                     | Lig1                            | 0.674   | 0.122 | 1.200    | 0.377 | 1.000  | 0.153 | 1.054  | 0.939 |
| 1379195_s_at | AI556346  | ligase I, DNA, ATP-dependent                                                     | Lig1                            | 0.986   | 0.721 | 1.282    | 0.023 | 0.679  | 0.898 | 1.342  | 0.233 |
| 1374010_at   | BI275032  | Ligase III, DNA, ATP-dependent                                                   | Lig3                            | 0.995   | 0.175 | 1.143    | 0.516 | 1.009  | 0.246 | 0.933  | 0.161 |
| 1391874_at   | AW528103  | Like-glycosyltransferase (predicted)                                             | Large_predicted                 | 1.002   | 0.999 | 0.997    | 0.959 | 0.999  | 0.066 | 1.027  | 0.796 |
| 1388566_at   | AI102215  | LIM and SH3 protein 1                                                            | Lasp1                           | 1.945   | 0.015 | 1.418    | 0.046 | 1.380  | 0.231 | 0.835  | 0.498 |
| 1371317_at   | BI296590  | LIM domain binding 1 (predicted)                                                 | Ldb1_predicted                  | 0.804   | 0.091 | 0.538    | 0.061 | 0.709  | 0.071 | 0.635  | 0.106 |
| 1383824_at   | AI029445  | LIM domain binding 2 (predicted)                                                 | Ldb2_predicted                  | 0.801   | 0.406 | 0.740    | 0.254 | 1.129  | 0.389 | 0.501  | 0.046 |
| 1389885_at   | BI294855  | LIM domain containing 2                                                          | Limd2                           | 0.991   | 0.650 | 0.829    | 0.123 | 0.561  | 0.018 | 0.746  | 0.032 |
| 1383863_at   | BF288303  | LIM domain only 2                                                                | Lmo2                            | 9.160   | 0.002 | 3.216    | 0.003 | 19.140 | 0.000 | 5.876  | 0.001 |
| 1373374_at   | BM389691  | LIM domain only 4                                                                | Lmo4                            | 1.115   | 0.235 | 3.291    | 0.026 | 1.172  | 0.601 | 2.062  | 0.061 |
| 1396470_at   | BF561077  | LIM domain only 4                                                                | Lmo4                            | 1.238   | 0.614 | 1.803    | 0.017 | 0.695  | 0.971 | 2.048  | 0.015 |
| 1375726_at   | BI284480  | LIM domain only protein 7                                                        | LMO7                            | 0.747   | 0.032 | 0.951    | 0.571 | 0.765  | 0.033 | 0.854  | 0.312 |
| 1381798_at   | BE114958  | LIM domain only protein 7                                                        | LMO7                            | 1.021   | 0.698 | 1.662    | 0.595 | 1.216  | 0.410 | 1.492  | 0.219 |
| 1377206_at   | BI282093  | LIM homeobox protein 1                                                           | Lhx1                            | 1.428   | 0.208 | 1.791    | 0.179 | 1.019  | 0.059 | 1.016  | 0.909 |
| 1389982_at   | BF419586  | LIM homeobox protein 1                                                           | Lhx1                            | 1.069   | 0.653 | 1.984    | 0.000 | 1.143  | 0.959 | 1.445  | 0.007 |
| 1394567_at   | AW535805  | LIM homeobox protein 3                                                           | Lhx3                            | 0.644   | 0.099 | 0.995    | 0.957 | 0.747  | 0.102 | 0.938  | 0.177 |
| 1384740_at   | BF412896  | LIM homeobox protein 3                                                           | Lhx3                            | 0.768   | 0.521 | 0.815    | 0.811 | 0.681  | 0.056 | 1.064  | 0.495 |
| 1369149_at   | NM_031727 | LIM motif-containing protein kinase 1                                            | Limk1                           | 0.661   | 0.307 | 0.979    | 0.805 | 0.701  | 0.404 | 0.885  | 0.493 |
| 1387090_a_at | NM_024135 | LIM motif-containing protein kinase 2                                            | Limk2                           | 1.014   | 0.994 | 0.997    | 0.968 | 0.993  | 0.629 | 0.999  | 0.992 |
| 1379505_at   | BG380642  | limb expression 1 homolog (chicken) (predicted) /// similar to limb expression 1 | Lix1_predicted ///<br>LOC500376 | 1.015   | 0.986 | 0.724    | 0.220 | 0.983  | 0.744 | 0.991  | 0.989 |
| 1396959_at   | BM382853  | Limbic system-associated membrane protein                                        | Lsamp                           | 1.151   | 0.695 | 0.999    | 0.974 | 0.997  | 0.988 | 0.991  | 0.841 |
| 1367865_at   | NM_133421 | limkain b1                                                                       | Lkap                            | 1.424   | 0.004 | 1.017    | 0.322 | 1.693  | 0.005 | 1.046  | 0.193 |
| 1369610_at   | NM_021851 | lin-7 homolog C (C. elegans)                                                     | Lin7c                           | 0.577   | 0.386 | 2.037    | 0.090 | 0.628  | 0.056 | 1.785  | 0.136 |
| 1367723_a_at | NM_031621 | linker of T-cell receptor pathways                                               | Lnk                             | 0.829   | 0.230 | 1.017    | 0.169 | 0.534  | 0.083 | 0.920  | 0.399 |
| 1382465_at   | AW533397  | lipase, hormone sensitive                                                        | Lipe                            | 0.999   | 0.987 | 0.997    | 0.945 | 0.999  | 0.884 | 0.993  | 0.906 |
| 1377599_at   | BM385286  | lipin 1                                                                          | Lpin1                           | 0.701   | 0.581 | 1.180    | 0.214 | 0.285  | 0.003 | 1.070  | 0.631 |
| 1391378_at   | BF418338  | Lipin 2 (predicted)                                                              | Lpin2_predicted                 | 1.838   | 0.041 | 1.225    | 0.231 | 1.826  | 0.033 | 1.182  | 0.468 |
| 1387011_at   | NM_130741 | lipocalin 2                                                                      | Lcn2                            | 134.500 | 0.006 | 1482.998 | 0.000 | 1.648  | 0.854 | 34.096 | 0.003 |
| 1368368_a_at | NM_032616 | lipolysis stimulated lipoprotein receptor                                        | Lsr                             | 1.698   | 0.043 | 1.373    | 0.884 | 1.723  | 0.015 | 1.927  | 0.049 |
| 1375158_at   | BI291441  | Lipolysis stimulated lipoprotein receptor                                        | Lsr                             | 0.696   | 0.362 | 1.000    | 0.996 | 1.418  | 0.491 | 1.002  | 0.974 |
| 1376664_at   | BM386170  | liver regeneration-related protein                                               | LOC246187                       | 0.931   | 0.704 | 1.121    | 0.321 | 1.054  | 0.611 | 1.032  | 0.762 |
| 1397153_at   | BE115262  | LMBR1 domain containing 1                                                        | Lmbrd1                          | 1.470   | 0.170 | 1.885    | 0.014 | 1.758  | 0.207 | 1.480  | 0.064 |
| 1373051_at   | BM383988  | LMBR1 domain containing 1                                                        | Lmbrd1                          | 0.819   | 0.336 | 0.768    | 0.018 | 0.881  | 0.160 | 0.993  | 0.399 |



|              |           |                                                                                    |                                       |        |       |        |       |        |       |        |       |
|--------------|-----------|------------------------------------------------------------------------------------|---------------------------------------|--------|-------|--------|-------|--------|-------|--------|-------|
| 1387757_at   | NM_139189 | LMBR1 domain containing 1                                                          | Lmbrd1                                | 0.758  | 0.698 | 0.799  | 0.114 | 0.453  | 0.303 | 0.927  | 0.694 |
| 1383230_at   | BI282204  | LOC360664 (predicted)                                                              | RGD1311078_predicted                  | 0.787  | 0.163 | 1.731  | 0.153 | 0.738  | 0.099 | 1.177  | 0.427 |
| 1392866_at   | AI044609  | LOC360791 (predicted)                                                              | RGD1307391_predicted                  | 0.979  | 0.661 | 0.651  | 0.515 | 1.002  | 0.993 | 0.761  | 0.185 |
| 1396257_at   | BF389756  | LOC360791 (predicted)                                                              | RGD1307391_predicted                  | 0.820  | 0.914 | 0.916  | 0.585 | 1.123  | 0.549 | 1.141  | 0.685 |
| 1373983_at   | AI168986  | LOC360807                                                                          | LOC360807                             | 1.431  | 0.000 | 2.048  | 0.001 | 1.202  | 0.031 | 1.587  | 0.003 |
| 1382415_at   | BI289373  | LOC360807                                                                          | LOC360807                             | 1.333  | 0.240 | 1.905  | 0.023 | 1.810  | 0.756 | 1.324  | 0.373 |
| 1390435_at   | AA996717  | LOC361111 (predicted)                                                              | RGD1307583_predicted                  | 0.370  | 0.005 | 1.029  | 0.786 | 0.321  | 0.037 | 0.862  | 0.543 |
| 1390409_at   | BI294742  | LOC361774 (predicted)                                                              | RGD1306116_predicted                  | 1.109  | 0.471 | 1.957  | 0.009 | 1.036  | 0.649 | 1.700  | 0.050 |
| 1383432_at   | AI716676  | LOC362136 (predicted)                                                              | RGD1309610_predicted                  | 0.281  | 0.001 | 0.084  | 0.002 | 0.248  | 0.006 | 0.149  | 0.003 |
| 1388706_at   | BF524995  | LOC362678 (predicted)                                                              | RGD1308923_predicted                  | 0.989  | 0.729 | 0.923  | 0.390 | 0.990  | 0.979 | 0.615  | 0.258 |
| 1372843_at   | BG377188  | LOC363020 (predicted)                                                              | RGD1309410_predicted                  | 0.650  | 0.009 | 1.209  | 0.118 | 0.576  | 0.013 | 1.540  | 0.010 |
| 1376372_at   | BI301069  | LOC498083                                                                          | LOC498083                             | 1.065  | 0.672 | 0.956  | 0.867 | 0.863  | 0.630 | 1.543  | 0.886 |
| 1372023_at   | BI279581  | LOC498674                                                                          | LOC498674                             | 0.438  | 0.159 | 0.516  | 0.063 | 0.490  | 0.177 | 0.852  | 0.998 |
| 1371715_at   | AI012212  | LOC500651                                                                          | MGC112883                             | 0.425  | 0.088 | 0.604  | 0.002 | 0.411  | 0.032 | 0.590  | 0.007 |
| 1382882_x_at | AA963228  | LOC500720 /// RGD1564761 (predicted)                                               | LOC500720 ///<br>RGD1564761_predicted | 0.780  | 0.027 | 0.513  | 0.002 | 0.783  | 0.076 | 0.445  | 0.004 |
| 1394693_at   | AW919728  | LOC500720 /// RGD1564761 (predicted)                                               | LOC500720 ///<br>RGD1564761_predicted | 0.668  | 0.059 | 0.393  | 0.006 | 0.706  | 0.037 | 0.403  | 0.078 |
| 1392166_at   | BE099838  | LOC500720 /// RGD1564761 (predicted)                                               | LOC500720 ///<br>RGD1564761_predicted | 0.766  | 0.265 | 0.520  | 0.003 | 0.826  | 0.159 | 0.479  | 0.012 |
| 1398716_at   | BG670822  | LOC500720 /// RGD1564761 (predicted)                                               | LOC500720 ///<br>RGD1564761_predicted | 0.963  | 0.320 | 0.472  | 0.008 | 0.793  | 0.317 | 0.432  | 0.051 |
| 1397700_x_at | BG670822  | LOC500720 /// RGD1564761 (predicted)                                               | LOC500720 ///<br>RGD1564761_predicted | 0.832  | 0.461 | 0.547  | 0.005 | 0.907  | 0.435 | 0.402  | 0.015 |
| 1397007_at   | BI278529  | LOC501214                                                                          | LOC501214                             | 1.048  | 0.990 | 1.078  | 0.151 | 1.271  | 0.337 | 0.884  | 0.126 |
| 1395590_at   | BF391746  | LOC501485                                                                          | LOC501485                             | 0.858  | 0.725 | 0.792  | 0.105 | 0.986  | 0.950 | 0.903  | 0.071 |
| 1371444_at   | BI284504  | Longevity assurance homolog 2 ( <i>S. cerevisiae</i> )                             | Lass2                                 | 0.452  | 0.242 | 0.604  | 0.051 | 0.507  | 0.039 | 0.613  | 0.015 |
| 1371676_at   | BG380464  | longevity assurance homolog 5 ( <i>S. cerevisiae</i> ) (predicted)                 | Lass5_predicted                       | 0.547  | 0.257 | 1.455  | 0.030 | 0.380  | 0.005 | 1.041  | 0.792 |
| 1372443_at   | AI409038  | low density lipoprotein receptor-related protein 11 (predicted)                    | Lrp11_predicted                       | 2.602  | 0.004 | 1.895  | 0.006 | 1.430  | 0.133 | 1.172  | 0.032 |
| 1384069_at   | BG670059  | low density lipoprotein receptor-related protein 11 (predicted)                    | Lrp11_predicted                       | 2.026  | 0.041 | 2.135  | 0.021 | 1.538  | 0.810 | 1.059  | 0.244 |
| 1368239_at   | NM_053541 | low density lipoprotein receptor-related protein 3                                 | Lrp3                                  | 0.866  | 0.424 | 0.906  | 0.014 | 0.955  | 0.475 | 1.022  | 0.540 |
| 1370932_at   | AI070976  | low density lipoprotein receptor-related protein 4                                 | Lrp4                                  | 0.989  | 0.974 | 0.552  | 0.050 | 1.001  | 0.958 | 0.548  | 0.049 |
| 1381363_at   | BF388580  | Low density lipoprotein receptor-related protein 6 (predicted)                     | Lrp6_predicted                        | 1.315  | 0.034 | 0.766  | 0.033 | 1.033  | 0.707 | 0.516  | 0.009 |
| 1376725_at   | BM391816  | low density lipoprotein receptor-related protein 6 (predicted)                     | Lrp6_predicted                        | 0.589  | 0.197 | 1.035  | 0.843 | 0.446  | 0.030 | 0.709  | 0.128 |
| 1388148_a_at | AI232268  | low density lipoprotein receptor-related protein associated protein 1              | Lrpap1                                | 0.605  | 0.235 | 0.597  | 0.044 | 0.590  | 0.107 | 0.677  | 0.025 |
| 1374108_at   | BM388942  | low density lipoprotein-related protein 12 (predicted)                             | Lrp12_predicted                       | 0.759  | 0.006 | 0.529  | 0.000 | 0.763  | 0.018 | 0.573  | 0.009 |
| 1371417_at   | AI233054  | low molecular mass ubiquinone-binding protein                                      | Qpc                                   | 0.641  | 0.364 | 0.874  | 0.072 | 0.697  | 0.015 | 0.572  | 0.103 |
| 1386878_at   | AI104234  | low-density lipoprotein receptor-related protein 10                                | Lrp10                                 | 0.828  | 0.321 | 0.837  | 0.237 | 0.948  | 0.114 | 0.836  | 0.011 |
| 1370928_at   | BI284739  | LPS-induced TN factor                                                              | Litaf                                 | 1.726  | 0.196 | 2.186  | 0.000 | 1.626  | 0.064 | 2.046  | 0.004 |
| 1374495_at   | BM388121  | LPS-responsive beige-like anchor (predicted)                                       | Lrba_predicted                        | 0.798  | 0.613 | 0.706  | 0.008 | 1.062  | 0.965 | 0.592  | 0.103 |
| 1378988_at   | BE117226  | LPS-responsive beige-like anchor (predicted)                                       | Lrba_predicted                        | 0.958  | 0.846 | 0.998  | 0.987 | 0.999  | 0.620 | 0.995  | 0.991 |
| 1381970_at   | AA945865  | LSM14 homolog A (SCD6, <i>S. cerevisiae</i> ) (predicted)                          | Lsm14a_predicted                      | 1.544  | 0.026 | 1.648  | 0.012 | 1.366  | 0.042 | 2.085  | 0.004 |
| 1377905_at   | BF417956  | LSM14 homolog A (SCD6, <i>S. cerevisiae</i> ) (predicted)                          | Lsm14a_predicted                      | 1.889  | 0.097 | 1.377  | 0.033 | 1.610  | 0.072 | 1.177  | 0.044 |
| 1388488_at   | AA943742  | LSM3 homolog, U6 small nuclear RNA associated ( <i>S. cerevisiae</i> ) (predicted) | Lsm3_predicted                        | 1.750  | 0.354 | 3.145  | 0.032 | 1.426  | 0.181 | 2.829  | 0.032 |
| 1371683_at   | AI103250  | LSM4 homolog, U6 small nuclear RNA associated ( <i>S. cerevisiae</i> ) (predicted) | Lsm4_predicted                        | 1.055  | 0.755 | 1.406  | 0.033 | 0.996  | 0.487 | 1.557  | 0.403 |
| 1376483_at   | AW251852  | LSM5 homolog, U6 small nuclear RNA associated ( <i>S. cerevisiae</i> ) (predicted) | Lsm5_predicted                        | 0.738  | 0.065 | 1.586  | 0.015 | 0.828  | 0.445 | 1.553  | 0.004 |
| 1388772_at   | AI177016  | LSM8 homolog, U6 small nuclear RNA associated ( <i>S. cerevisiae</i> ) (predicted) | Lsm8_predicted                        | 0.408  | 0.039 | 0.537  | 0.015 | 0.503  | 0.009 | 0.773  | 0.004 |
| 1372312_at   | AI176212  | LTV1 homolog ( <i>S. cerevisiae</i> )                                              | Ltv1                                  | 0.459  | 0.088 | 1.066  | 0.272 | 0.476  | 0.011 | 0.991  | 0.937 |
| 1392207_at   | BG373449  | LUC7-like ( <i>S. cerevisiae</i> )                                                 | Luc7l                                 | 0.995  | 0.788 | 1.357  | 0.132 | 1.088  | 0.622 | 0.943  | 0.711 |
| 1392425_x_at | BI275713  | LUC7-like ( <i>S. cerevisiae</i> )                                                 | Luc7l                                 | 0.838  | 0.871 | 2.691  | 0.003 | 1.652  | 0.162 | 1.484  | 0.212 |
| 1372309_at   | BI296558  | LUC7-like 2 ( <i>S. cerevisiae</i> ) (predicted)                                   | Luc7l2_predicted                      | 0.789  | 0.331 | 0.757  | 0.299 | 0.904  | 0.698 | 0.758  | 0.194 |
| 1394283_at   | AW144132  | LUC7-like 2 ( <i>S. cerevisiae</i> ) (predicted)                                   | Luc7l2_predicted                      | 0.933  | 0.710 | 1.664  | 0.007 | 1.025  | 0.337 | 1.620  | 0.013 |
| 1384146_at   | AI236895  | LUC7-like 2 ( <i>S. cerevisiae</i> ) (predicted)                                   | Luc7l2_predicted                      | 0.908  | 0.844 | 1.216  | 0.252 | 0.892  | 0.358 | 1.101  | 0.660 |
| 1387423_at   | NM_012978 | lutetizing hormone/choriogonadotropin receptor                                     | Lhcgr                                 | 1.005  | 0.942 | 1.000  | 0.953 | 0.979  | 0.721 | 0.998  | 0.970 |
| 1389510_at   | BE111765  | Ly1 antibody reactive clone                                                        | Lyar                                  | 0.276  | 0.054 | 0.961  | 0.854 | 0.232  | 0.039 | 0.960  | 0.565 |
| 1377459_at   | AI764114  | lymphocyte antigen 6 complex, locus G6E                                            | Ly6g6e                                | 0.999  | 0.866 | 0.998  | 0.904 | 1.001  | 0.978 | 1.000  | 0.995 |
| 1389210_at   | BE109711  | lymphocyte cytosolic protein 1                                                     | Lcp1                                  | 12.590 | 0.029 | 21.249 | 0.005 | 6.948  | 0.001 | 3.300  | 0.046 |
| 1383785_at   | BE115061  | Lymphoid enhancer binding factor 1                                                 | Lef1                                  | 0.973  | 0.684 | 0.658  | 0.069 | 0.912  | 0.267 | 0.621  | 0.141 |
| 1379499_at   | BF282228  | lymphotoxin B                                                                      | Ltb                                   | 3.881  | 0.024 | 5.380  | 0.011 | 36.253 | 0.002 | 47.983 | 0.000 |
| 1372914_at   | AI705656  | lymphotoxin B receptor                                                             | Ltbr                                  | 0.802  | 0.799 | 1.238  | 0.087 | 0.882  | 0.417 | 1.146  | 0.075 |
| 1373904_at   | AI103948  | LysM, putative peptidoglycan-binding, domain containing 2 (predicted)              | Lysmd2_predicted                      | 0.883  | 0.749 | 1.897  | 0.000 | 0.610  | 0.097 | 1.619  | 0.020 |

|              |           |                                                                         |                   |       |       |       |       |       |       |       |       |
|--------------|-----------|-------------------------------------------------------------------------|-------------------|-------|-------|-------|-------|-------|-------|-------|-------|
| 1376436_at   | AI071181  | LysM, putative peptidoglycan-binding, domain containing 3               | Lysmd3            | 1.674 | 0.019 | 3.172 | 0.005 | 1.896 | 0.018 | 3.089 | 0.024 |
| 1367832_at   | NM_013006 | lysophospholipase 1                                                     | Lypla1            | 0.679 | 0.189 | 0.659 | 0.001 | 0.813 | 0.041 | 0.838 | 0.443 |
| 1367458_at   | NM_031342 | lysophospholipase 2                                                     | Lypla2            | 0.998 | 0.888 | 1.001 | 0.949 | 0.940 | 0.929 | 0.998 | 0.940 |
| 1375034_at   | AI410383  | lysophospholipase 3                                                     | Lypla3            | 1.178 | 0.672 | 0.877 | 0.091 | 0.761 | 0.243 | 0.834 | 0.075 |
| 1372281_at   | AA819059  | lysophospholipase-like 1 (predicted)                                    | Lyplal1_predicted | 0.482 | 0.263 | 0.490 | 0.006 | 0.831 | 0.046 | 0.524 | 0.022 |
| 1368075_at   | NM_012732 | lysosomal acid lipase 1                                                 | Lip1              | 2.223 | 0.043 | 2.907 | 0.046 | 7.842 | 0.001 | 7.198 | 0.003 |
| 1368504_at   | NM_012857 | lysosomal membrane glycoprotein 1                                       | Lamp1             | 1.014 | 0.507 | 1.251 | 0.000 | 0.916 | 0.144 | 1.271 | 0.001 |
| 1383080_at   | BI292252  | Lysosomal membrane glycoprotein 2                                       | Lamp2             | 1.427 | 0.013 | 1.159 | 0.356 | 1.656 | 0.002 | 1.328 | 0.228 |
| 1370010_at   | NM_017068 | lysosomal membrane glycoprotein 2                                       | Lamp2             | 0.964 | 0.246 | 1.104 | 0.277 | 1.250 | 0.012 | 1.147 | 0.095 |
| 1380097_at   | BE098726  | Lysosomal-associated protein transmembrane 4A                           | Laptm4a           | 1.624 | 0.128 | 2.024 | 0.030 | 2.258 | 0.007 | 1.709 | 0.044 |
| 1388748_at   | AW525776  | lysosomal-associated protein transmembrane 4A                           | Laptm4a           | 1.044 | 0.496 | 1.333 | 0.045 | 1.435 | 0.307 | 1.556 | 0.008 |
| 1388728_at   | BI282923  | lysosomal-associated protein transmembrane 4B                           | Laptm4b           | 0.538 | 0.122 | 0.453 | 0.001 | 0.618 | 0.014 | 0.510 | 0.002 |
| 1372006_at   | BM391274  | Lysyl oxidase-like 2 (predicted)                                        | Loxl2_predicted   | 0.669 | 0.369 | 0.193 | 0.001 | 0.880 | 0.322 | 0.292 | 0.004 |
| 1388849_at   | BG375145  | Lysyl oxidase-like 3 (predicted)                                        | Loxl3_predicted   | 0.891 | 0.246 | 1.173 | 0.020 | 0.819 | 0.191 | 1.036 | 0.541 |
| 1371662_at   | AA892250  | lysyl-tRNA synthetase                                                   | Kars              | 2.751 | 0.002 | 2.687 | 0.000 | 3.415 | 0.004 | 3.449 | 0.005 |
| 1393136_at   | BF393285  | macoilin                                                                | LOC313618         | 0.617 | 0.060 | 2.031 | 0.018 | 0.583 | 0.046 | 1.520 | 0.049 |
| 1371734_at   | BI282245  | macrophage erythroblast attacher                                        | Maea              | 0.727 | 0.137 | 1.780 | 0.000 | 0.623 | 0.005 | 1.249 | 0.022 |
| 1367609_at   | NM_031051 | macrophage migration inhibitory factor                                  | Mif               | 0.398 | 0.300 | 1.636 | 0.156 | 0.349 | 0.020 | 1.211 | 0.193 |
| 1389373_at   | AI029555  | MAD homolog 1 (Drosophila)                                              | Smad1             | 2.921 | 0.037 | 2.013 | 0.001 | 2.914 | 0.018 | 1.597 | 0.011 |
| 1369174_at   | NM_013130 | MAD homolog 1 (Drosophila)                                              | Smad1             | 1.175 | 0.101 | 1.006 | 0.977 | 1.013 | 0.852 | 1.108 | 0.095 |
| 1396061_at   | AI511079  | MAD homolog 1 (Drosophila)                                              | Smad1             | 1.190 | 0.446 | 1.497 | 0.099 | 1.363 | 0.028 | 1.094 | 0.600 |
| 1368214_at   | NM_019191 | MAD homolog 2 (Drosophila)                                              | Smad2             | 0.974 | 0.553 | 2.073 | 0.011 | 1.145 | 0.459 | 1.804 | 0.051 |
| 1390827_at   | AA997679  | MAD homolog 3 (Drosophila)                                              | Smad3             | 0.746 | 0.117 | 1.020 | 0.906 | 0.580 | 0.004 | 0.837 | 0.372 |
| 1386984_at   | NM_019275 | MAD homolog 4 (Drosophila)                                              | Smad4             | 1.773 | 0.069 | 2.412 | 0.000 | 1.740 | 0.006 | 2.275 | 0.001 |
| 1367910_at   | AB010954  | MAD homolog 4 (Drosophila)                                              | Smad4             | 1.034 | 0.183 | 1.750 | 0.043 | 1.022 | 0.316 | 1.561 | 0.131 |
| 1385928_at   | AI175564  | MAD homolog 6 (Drosophila) (predicted)                                  | Smad6_predicted   | 1.424 | 0.383 | 0.988 | 0.571 | 0.950 | 0.926 | 1.000 | 0.882 |
| 1368896_at   | NM_030858 | MAD homolog 7 (Drosophila)                                              | Madh7             | 1.214 | 0.206 | 1.642 | 0.100 | 2.011 | 0.067 | 1.762 | 0.022 |
| 1374146_at   | BF419366  | MAD2 mitotic arrest deficient-like 2 (yeast)                            | Mad2l2            | 0.967 | 0.512 | 2.373 | 0.105 | 1.132 | 0.283 | 1.552 | 0.187 |
| 1372409_at   | BI286562  | MAD2L1 binding protein                                                  | Mad2l1bp          | 1.007 | 0.582 | 1.460 | 0.139 | 1.022 | 0.930 | 1.613 | 0.102 |
| 1371374_at   | AI172177  | MAF1 homolog (S. cerevisiae)                                            | Maf1              | 0.722 | 0.045 | 0.999 | 0.988 | 0.985 | 0.674 | 1.149 | 0.283 |
| 1372815_at   | BG673028  | mago-nashi homolog, proliferation-associated (Drosophila) (predicted)   | Magoh_predicted   | 0.669 | 0.039 | 0.850 | 0.052 | 0.634 | 0.013 | 0.944 | 0.543 |
| 1370904_at   | BI301490  | major histocompatibility complex, class II, DM alpha                    | Hla-dma           | 1.206 | 0.152 | 1.013 | 0.817 | 1.008 | 0.541 | 1.170 | 0.013 |
| 1370882_at   | AI171966  | major histocompatibility complex, class II, DM beta                     | Hla-dmb           | 1.001 | 0.930 | 1.126 | 0.045 | 1.009 | 0.945 | 2.808 | 0.004 |
| 1372293_at   | AF023090  | Major histocompatibility complex-like mRNA, partial sequence            | ---               | 0.614 | 0.271 | 1.312 | 0.069 | 0.655 | 0.047 | 0.849 | 0.339 |
| 1367925_at   | NM_022715 | major vault protein                                                     | Mvp               | 2.514 | 0.010 | 2.072 | 0.003 | 2.135 | 0.030 | 2.216 | 0.002 |
| 1398804_at   | NM_133324 | MAK10 homolog, amino-acid N-acetyltransferase subunit, (S. cerevisiae)  | Mak10             | 0.861 | 0.683 | 1.119 | 0.747 | 0.575 | 0.139 | 1.001 | 0.992 |
| 1397556_at   | BF563329  | Mak3 homolog (S. cerevisiae) (predicted)                                | Mak3_predicted    | 0.923 | 0.454 | 5.264 | 0.000 | 0.686 | 0.374 | 3.219 | 0.014 |
| 1389382_at   | BI277034  | makorin, ring finger protein, 2                                         | Mkrn2             | 0.999 | 0.995 | 0.726 | 0.687 | 1.000 | 0.994 | 0.812 | 0.901 |
| 1384361_at   | BF555523  | mal, T-cell differentiation protein 2                                   | Mal2              | 0.627 | 0.130 | 0.752 | 0.527 | 1.040 | 0.651 | 1.012 | 0.969 |
| 1372755_at   | AI102073  | mal, T-cell differentiation protein 2                                   | Mal2              | 0.860 | 0.842 | 0.788 | 0.155 | 0.776 | 0.139 | 0.835 | 0.553 |
| 1372790_at   | BG671530  | Malate dehydrogenase 1, NAD (soluble)                                   | Mdh1              | 0.465 | 0.027 | 0.196 | 0.002 | 0.535 | 0.013 | 0.293 | 0.006 |
| 1367653_a_at | NM_033235 | malate dehydrogenase 1, NAD (soluble)                                   | Mdh1              | 0.665 | 0.297 | 0.517 | 0.000 | 0.662 | 0.051 | 0.518 | 0.011 |
| 1369927_at   | NM_031151 | malate dehydrogenase, mitochondrial                                     | Mor1              | 0.530 | 0.300 | 0.864 | 0.006 | 0.477 | 0.005 | 0.787 | 0.071 |
| 1382430_at   | AI172357  | male-specific lethal 2-like 1 (Drosophila) (predicted)                  | Msl2l1_predicted  | 1.408 | 0.092 | 1.135 | 0.168 | 1.347 | 0.075 | 1.356 | 0.341 |
| 1372320_at   | BE103894  | male-specific lethal-3 homolog 1 (Drosophila)                           | Msl3l1            | 0.883 | 0.692 | 1.634 | 0.017 | 0.824 | 0.170 | 1.190 | 0.266 |
| 1370870_at   | M30596    | malic enzyme 1                                                          | Me1               | 0.513 | 0.165 | 0.540 | 0.001 | 0.573 | 0.001 | 0.668 | 0.030 |
| 1370067_at   | NM_012600 | malic enzyme 1                                                          | Me1               | 0.556 | 0.385 | 0.557 | 0.010 | 0.631 | 0.200 | 0.835 | 0.007 |
| 1381403_at   | AI575071  | malic enzyme 2, NAD(+)-dependent, mitochondrial (predicted)             | Me2_predicted     | 0.308 | 0.103 | 0.687 | 0.078 | 0.253 | 0.053 | 0.811 | 0.070 |
| 1389572_at   | AI410864  | malic enzyme 3, NADP(+)-dependent, mitochondrial (predicted)            | Me3_predicted     | 1.572 | 0.156 | 1.870 | 0.008 | 1.068 | 0.463 | 1.988 | 0.039 |
| 1393738_s_at | AI136864  | malignant fibrous histiocytoma amplified sequence 1 (predicted)         | Mfhas1_predicted  | 0.635 | 0.508 | 0.990 | 0.999 | 0.894 | 0.397 | 0.799 | 0.756 |
| 1398648_at   | AI136864  | malignant fibrous histiocytoma amplified sequence 1 (predicted)         | Mfhas1_predicted  | 1.010 | 0.950 | 1.002 | 0.968 | 1.013 | 0.206 | 1.000 | 0.966 |
| 1388660_at   | BI295915  | malignant T cell amplified sequence 1                                   | Mcts1             | 0.510 | 0.302 | 0.659 | 0.020 | 0.542 | 0.008 | 0.691 | 0.020 |
| 1367638_at   | NM_053477 | malonyl-CoA decarboxylase                                               | Mlycd             | 0.539 | 0.242 | 0.692 | 0.028 | 0.488 | 0.269 | 0.790 | 0.293 |
| 1379363_at   | BF283311  | Maltase-glucoamylase (predicted)                                        | Mgam_predicted    | 0.994 | 0.227 | 0.311 | 0.094 | 1.035 | 0.783 | 0.513 | 0.138 |
| 1396289_at   | BI283720  | MAM domain containing glycosylphosphatidylinositol anchor 1 (predicted) | Mdgal1_predicted  | 0.878 | 0.304 | 1.096 | 0.329 | 1.090 | 0.617 | 1.000 | 1.000 |
| 1388588_at   | AI236101  | mammary tumor virus receptor 2                                          | Mtvr2             | 1.461 | 0.391 | 1.604 | 0.045 | 1.371 | 0.111 | 1.549 | 0.029 |
| 1377041_at   | AA891664  | manic fringe homolog (Drosophila)                                       | Mfng              | 0.240 | 0.006 | 0.623 | 0.071 | 0.366 | 0.026 | 1.025 | 0.056 |
| 1373681_at   | AA799505  | mannose phosphate isomerase (mapped)                                    | Mpi_mapped        | 0.984 | 0.958 | 0.973 | 0.846 | 0.981 | 0.896 | 0.621 | 0.030 |
| 1371495_at   | AA943990  | mannose-6-phosphate receptor, cation dependent                          | M6pr              | 0.717 | 0.128 | 1.014 | 0.167 | 0.910 | 0.585 | 1.063 | 0.043 |
| 1371655_at   | BI281806  | mannose-P-dolichol utilization defect 1                                 | Mpdu1             | 0.768 | 0.556 | 0.990 | 0.385 | 0.707 | 0.063 | 1.110 | 0.119 |
| 1383574_at   | AI502956  | mannosidase 1, alpha (predicted)                                        | Man1a_predicted   | 0.403 | 0.056 | 3.691 | 0.009 | 0.557 | 0.109 | 4.732 | 0.003 |

|              |           |                                                                                     |                                   |       |       |       |       |       |       |       |       |
|--------------|-----------|-------------------------------------------------------------------------------------|-----------------------------------|-------|-------|-------|-------|-------|-------|-------|-------|
| 1371988_at   | AA892549  | mannosidase 1, alpha (predicted)                                                    | Man1a_predicted                   | 0.612 | 0.191 | 0.690 | 0.070 | 0.697 | 0.087 | 0.782 | 0.053 |
| 1377463_at   | BE099244  | Mannosidase 2, alpha 2 (predicted)                                                  | Man2a2_predicted                  | 1.929 | 0.002 | 2.040 | 0.009 | 1.889 | 0.003 | 2.175 | 0.001 |
| 1376674_at   | BI274940  | Mannosidase 2, alpha 2 (predicted)                                                  | Man2a2_predicted                  | 1.522 | 0.129 | 1.110 | 0.122 | 2.401 | 0.005 | 1.380 | 0.075 |
| 1374110_at   | BI278556  | Mannosidase 2, alpha 2 (predicted)                                                  | Man2a2_predicted                  | 1.284 | 0.278 | 1.226 | 0.214 | 1.261 | 0.579 | 1.017 | 0.625 |
| 1388699_at   | BE114558  | mannosidase 2, alpha B1                                                             | Man2b1                            | 0.625 | 0.021 | 0.510 | 0.003 | 0.632 | 0.123 | 0.445 | 0.000 |
| 1381779_s_at | BG380027  | mannosidase, alpha, class 2C, member 1                                              | Man2c1                            | 0.812 | 0.132 | 0.887 | 0.872 | 0.777 | 0.367 | 0.925 | 0.993 |
| 1387920_at   | M57547    | mannosidase, alpha, class 2C, member 1                                              | Man2c1                            | 0.952 | 0.322 | 0.534 | 0.062 | 0.892 | 0.985 | 0.809 | 0.030 |
| 1371875_at   | BM388852  | mannosidase, beta A, lysosomal                                                      | Manba                             | 2.457 | 0.018 | 3.344 | 0.000 | 1.993 | 0.002 | 2.973 | 0.002 |
| 1367796_at   | NM_030861 | mannoside acetylglucosaminyltransferase 1                                           | Mgat1                             | 0.498 | 0.007 | 0.702 | 0.054 | 0.413 | 0.005 | 0.623 | 0.011 |
| 1379088_x_at | BF392858  | Mannoside acetylglucosaminyltransferase 1                                           | Mgat1                             | 1.658 | 0.152 | 0.830 | 0.922 | 1.482 | 0.123 | 0.624 | 0.149 |
| 1386982_at   | NM_053604 | mannoside acetylglucosaminyltransferase 2                                           | Mgat2                             | 0.383 | 0.104 | 0.271 | 0.000 | 0.395 | 0.043 | 0.331 | 0.028 |
| 1397027_at   | BF396069  | Mannoside acetylglucosaminyltransferase 5                                           | Mgat5                             | 1.298 | 0.672 | 0.744 | 0.271 | 1.166 | 0.086 | 0.685 | 0.245 |
| 1371446_at   | BI283703  | MAP kinase-activated protein kinase 2                                               | Mapkapk2                          | 1.522 | 0.101 | 2.337 | 0.019 | 0.851 | 0.512 | 1.596 | 0.014 |
| 1372038_at   | BM383395  | MAP kinase-interacting serine/threonine kinase 2                                    | Mknk2                             | 0.740 | 0.573 | 0.321 | 0.006 | 0.420 | 0.007 | 0.428 | 0.052 |
| 1368710_at   | NM_021699 | MAP/microtubule affinity-regulating kinase 2                                        | Mark2                             | 1.614 | 0.002 | 1.730 | 0.035 | 1.392 | 0.024 | 1.657 | 0.365 |
| 1368831_at   | NM_130749 | MAP/microtubule affinity-regulating kinase 3                                        | Mark3                             | 1.011 | 0.667 | 1.879 | 0.006 | 1.114 | 1.000 | 1.589 | 0.018 |
| 1383245_at   | AI454309  | MAP3K12 binding inhibitory protein 1 (predicted)                                    | Mbip_predicted                    | 1.096 | 0.357 | 0.594 | 0.417 | 1.066 | 0.241 | 0.770 | 0.996 |
| 1372580_at   | BF283599  | MAP-kinase activating death domain                                                  | Madd                              | 0.588 | 0.020 | 0.721 | 0.038 | 0.753 | 0.390 | 0.772 | 0.014 |
| 1369066_at   | NM_053585 | MAP-kinase activating death domain                                                  | Madd                              | 0.743 | 0.132 | 0.538 | 0.045 | 0.726 | 0.041 | 0.585 | 0.026 |
| 1369944_at   | NM_030862 | MARCKS-like 1                                                                       | Marcksl1                          | 1.230 | 0.533 | 1.031 | 0.457 | 1.663 | 0.248 | 0.938 | 0.856 |
| 1372342_at   | AI176583  | MARVEL (membrane-associating) domain containing 1                                   | Mrvldc1                           | 0.628 | 0.249 | 0.566 | 0.085 | 0.636 | 0.258 | 0.525 | 0.070 |
| 1380036_at   | BE101298  | MARVEL (membrane-associating) domain containing 1                                   | Mrvldc1                           | 0.967 | 0.847 | 0.975 | 0.938 | 1.004 | 0.457 | 0.960 | 0.638 |
| 1387002_at   | NM_053556 | maternal G10 transcript                                                             | G10                               | 0.681 | 0.503 | 0.822 | 0.049 | 0.824 | 0.026 | 0.682 | 0.016 |
| 1380579_at   | BM384214  | matrilin 1, cartilage matrix protein                                                | Matn1                             | 0.735 | 0.306 | 0.885 | 0.542 | 0.745 | 0.025 | 1.017 | 0.834 |
| 1368151_at   | NM_019149 | matrin 3                                                                            | Matr3                             | 1.201 | 0.050 | 1.227 | 0.001 | 1.039 | 0.032 | 1.385 | 0.027 |
| 1382522_at   | AI169689  | matrin 3 /// similar to Matrin 3 (predicted)                                        | Matr3 ///<br>RGD1560749_predicted | 3.551 | 0.017 | 1.919 | 0.055 | 1.592 | 0.049 | 1.235 | 0.022 |
| 1368595_at   | NM_031757 | matrix metalloproteinase 24                                                         | Mmp24                             | 0.382 | 0.033 | 0.274 | 0.003 | 0.265 | 0.013 | 0.249 | 0.009 |
| 1368657_at   | NM_133523 | matrix metalloproteinase 3                                                          | Mmp3                              | 6.711 | 0.007 | 4.527 | 0.019 | 1.365 | 0.398 | 0.987 | 0.638 |
| 1370320_at   | AY083160  | MAWD binding protein                                                                | Mawbp                             | 0.507 | 0.103 | 0.509 | 0.056 | 0.526 | 0.064 | 0.745 | 0.127 |
| 1390993_at   | AW532101  | MAWD binding protein                                                                | Mawbp                             | 0.457 | 0.116 | 0.556 | 0.025 | 0.388 | 0.012 | 0.718 | 0.093 |
| 1375929_at   | BI289109  | max binding protein (predicted)                                                     | Mnt_predicted                     | 0.900 | 0.416 | 1.807 | 0.007 | 0.978 | 0.965 | 1.595 | 0.003 |
| 1372093_at   | AI409308  | Max interacting protein 1                                                           | Mxi1                              | 0.444 | 0.041 | 1.011 | 0.680 | 0.792 | 0.177 | 0.916 | 0.787 |
| 1368963_at   | NM_013160 | Max interacting protein 1                                                           | Mxi1                              | 1.008 | 0.522 | 1.026 | 0.892 | 1.009 | 0.989 | 1.026 | 0.284 |
| 1387646_a_at | NM_022210 | Max protein                                                                         | Max                               | 0.995 | 0.982 | 1.011 | 0.270 | 1.231 | 0.070 | 1.015 | 1.000 |
| 1371929_at   | BI278563  | MAX-like protein X                                                                  | Mlx                               | 0.489 | 0.121 | 0.756 | 0.153 | 0.544 | 0.048 | 0.750 | 0.024 |
| 1385443_at   | AI549299  | MAX-like protein X                                                                  | Mlx                               | 0.469 | 0.603 | 0.971 | 0.436 | 0.600 | 0.062 | 0.860 | 0.227 |
| 1391849_at   | BF547270  | MBD2-interacting zinc finger (predicted)                                            | Mizf_predicted                    | 1.044 | 0.835 | 1.534 | 0.016 | 1.428 | 0.505 | 1.641 | 0.026 |
| 1369820_at   | NM_053951 | mcf.2 transforming sequence-like                                                    | Mcf2l                             | 1.110 | 0.959 | 0.706 | 0.151 | 0.284 | 0.031 | 0.484 | 0.055 |
| 1389168_at   | AI412239  | McKusick-Kaufman syndrome protein                                                   | Mkks                              | 0.488 | 0.215 | 0.863 | 0.091 | 0.255 | 0.026 | 0.957 | 0.655 |
| 1389433_at   | BI298816  | McKusick-Kaufman syndrome protein                                                   | Mkks                              | 0.683 | 0.440 | 0.200 | 0.008 | 0.936 | 0.805 | 0.407 | 0.014 |
| 1386479_at   | AI071163  | McKusick-Kaufman syndrome protein                                                   | Mkks                              | 0.988 | 0.634 | 0.598 | 0.323 | 0.588 | 0.164 | 0.635 | 0.033 |
| 1375382_at   | BE120346  | mediator of DNA damage checkpoint 1                                                 | Mdc1                              | 0.471 | 0.078 | 0.886 | 0.175 | 0.606 | 0.098 | 0.902 | 0.248 |
| 1388368_at   | BM389891  | mediator of RNA polymerase II transcription, subunit 28 homolog (yeast) (predicted) | Med28_predicted                   | 1.711 | 0.060 | 3.093 | 0.016 | 1.594 | 0.043 | 3.092 | 0.015 |
| 1393276_at   | BF418487  | mediator of RNA polymerase II transcription, subunit 31 homolog (yeast) (predicted) | Med31_predicted                   | 0.603 | 0.305 | 1.193 | 0.984 | 0.689 | 0.066 | 1.352 | 0.473 |
| 1392659_at   | AI045496  | Mediator of RNA polymerase II transcription, subunit 31 homolog (yeast) (predicted) | Med31_predicted                   | 1.002 | 0.985 | 1.400 | 0.065 | 0.919 | 0.066 | 1.145 | 0.055 |
| 1376196_a_at | BG375059  | mediator of RNA polymerase II transcription, subunit 4 homolog (yeast)              | Med4                              | 0.818 | 0.741 | 2.484 | 0.004 | 0.771 | 0.361 | 2.414 | 0.021 |
| 1372269_at   | AI229534  | mediator of RNA polymerase II transcription, subunit 6 homolog (yeast) (predicted)  | Med6_predicted                    | 0.771 | 0.963 | 1.251 | 0.576 | 0.605 | 0.016 | 1.169 | 0.376 |
| 1378977_at   | AI178197  | Mediator of RNA polymerase II transcription, subunit 8 homolog (yeast) (predicted)  | Med8_predicted                    | 0.899 | 0.404 | 0.670 | 0.112 | 0.767 | 0.053 | 0.827 | 0.038 |
| 1374629_at   | AI713147  | mediator of RNA polymerase II transcription, subunit 8 homolog (yeast) (predicted)  | Med8_predicted                    | 1.657 | 0.686 | 2.660 | 0.029 | 0.760 | 0.165 | 1.880 | 0.038 |
| 1394624_at   | AW528017  | Megakaryoblastic leukemia (translocation) 1 (predicted)                             | Mkl1_predicted                    | 0.832 | 0.055 | 0.954 | 0.807 | 1.077 | 0.567 | 1.350 | 0.342 |
| 1373189_at   | AW143154  | megakaryoblastic leukemia (translocation) 1 (predicted)                             | Mkl1_predicted                    | 0.706 | 0.890 | 0.434 | 0.107 | 0.756 | 0.337 | 1.074 | 0.111 |
| 1384308_at   | AW532697  | Meis1, myeloid ecotropic viral integration site 1 homolog (mouse) (predicted)       | Meis1_predicted                   | 1.232 | 0.433 | 0.472 | 0.005 | 2.217 | 0.015 | 0.879 | 0.222 |
| 1375392_at   | BF405277  | Meis1, myeloid ecotropic viral integration site 1 homolog 2 (predicted)             | Meis2_predicted                   | 0.853 | 0.107 | 0.825 | 0.925 | 1.153 | 0.668 | 1.016 | 0.992 |
| 1389728_at   | BE104098  | Meis1, myeloid ecotropic viral integration site 1 homolog 2 (predicted)             | Meis2_predicted                   | 0.934 | 0.971 | 0.509 | 0.016 | 0.868 | 0.415 | 0.771 | 0.552 |
| 1372800_at   | BF416139  | Meis1, myeloid ecotropic viral integration site 1 homolog 3 (mouse) (predicted)     | Meis3_predicted                   | 0.757 | 0.287 | 0.990 | 0.911 | 1.002 | 0.632 | 1.085 | 0.614 |
| 1386895_at   | NM_053409 | melanoma antigen, family D, 1                                                       | Maged1                            | 0.624 | 0.002 | 0.655 | 0.006 | 0.499 | 0.000 | 0.573 | 0.000 |
| 1367744_at   | NM_080479 | melanoma antigen, family D, 2                                                       | Maged2                            | 1.141 | 0.479 | 0.328 | 0.003 | 1.321 | 0.120 | 0.366 | 0.022 |
| 1377267_at   | BF402385  | melanoma antigen, family E, 1 (predicted)                                           | Magee1_predicted                  | 0.860 | 0.846 | 0.433 | 0.009 | 1.566 | 0.085 | 0.792 | 0.158 |
| 1395316_at   | H32543    | melanoma antigen, family H, 1                                                       | Mageh1                            | 0.402 | 0.002 | 0.355 | 0.001 | 0.448 | 0.016 | 0.375 | 0.020 |
| 1394409_at   | BE097621  | melanoma associated antigen (mutated) 1 (predicted)                                 | Mum1_predicted                    | 0.769 | 0.663 | 0.863 | 0.020 | 0.927 | 0.997 | 0.690 | 0.009 |

|              |           |                                                                              |                  |       |       |        |       |       |       |        |       |
|--------------|-----------|------------------------------------------------------------------------------|------------------|-------|-------|--------|-------|-------|-------|--------|-------|
| 1388905_at   | AI230770  | membralin                                                                    | RGD1311136       | 0.741 | 0.101 | 1.692  | 0.213 | 0.849 | 0.209 | 1.469  | 0.437 |
| 1396872_at   | AI555260  | Membrane associated guanylate kinase 1 b NT-short isoform                    | LOC500261        | 1.523 | 0.260 | 1.000  | 0.925 | 0.878 | 0.196 | 1.183  | 0.694 |
| 1398866_at   | AF255614  | membrane associated guanylate kinase, WW and PDZ domain containing 3         | Magi3            | 1.154 | 0.639 | 2.363  | 0.001 | 1.027 | 0.532 | 1.716  | 0.170 |
| 1368927_at   | NM_017249 | membrane bound C2 domain containing protein                                  | Mbc2             | 2.148 | 0.105 | 1.683  | 0.139 | 1.024 | 0.249 | 1.050  | 0.995 |
| 1398296_at   | NM_032615 | membrane interacting protein of RGS16                                        | Mir16            | 0.695 | 0.149 | 0.287  | 0.000 | 0.412 | 0.022 | 0.225  | 0.005 |
| 1374156_at   | BE108018  | membrane protein, palmitoylated 5 (MAGUK p55 subfamily member 5) (predicted) | Mpp5_predicted   | 0.728 | 0.002 | 0.880  | 0.405 | 0.744 | 0.020 | 1.060  | 0.685 |
| 1382363_at   | AI072027  | membrane protein, palmitoylated 5 (MAGUK p55 subfamily member 5) (predicted) | Mpp5_predicted   | 0.732 | 0.256 | 2.429  | 0.082 | 0.450 | 0.177 | 1.183  | 0.295 |
| 1397535_at   | BF555544  | membrane protein, palmitoylated 5 (MAGUK p55 subfamily member 5) (predicted) | Mpp5_predicted   | 1.044 | 0.637 | 1.260  | 0.089 | 0.659 | 0.015 | 1.341  | 0.067 |
| 1398205_at   | BF392849  | Membrane protein, palmitoylated 5 (MAGUK p55 subfamily member 5) (predicted) | Mpp5_predicted   | 1.890 | 0.749 | 2.574  | 0.016 | 1.489 | 0.436 | 1.311  | 0.161 |
| 1380062_at   | BE097259  | membrane protein, palmitoylated 6 (MAGUK p55 subfamily member 6) (predicted) | Mpp6_predicted   | 1.303 | 0.231 | 1.398  | 0.017 | 1.164 | 0.159 | 1.369  | 0.288 |
| 1383606_at   | BI302544  | membrane targeting (tandem) C2 domain containing 1                           | Mtac2d1          | 0.920 | 0.964 | 0.546  | 0.023 | 1.017 | 0.616 | 0.629  | 0.033 |
| 1372798_at   | BF282715  | membrane-associated DHHC16 zinc finger protein                               | LOC654495        | 0.575 | 0.052 | 0.448  | 0.064 | 0.863 | 0.118 | 0.620  | 0.021 |
| 1372448_at   | D86711    | membrane-associated DHHC5 zinc finger protein                                | LOC362156        | 0.892 | 0.993 | 0.767  | 0.026 | 0.807 | 0.323 | 0.712  | 0.037 |
| 1372571_at   | AW143187  | membrane-associated ring finger (C3HC4) 2                                    | March2           | 0.564 | 0.471 | 0.525  | 0.001 | 0.341 | 0.128 | 0.648  | 0.062 |
| 1384285_at   | BI298096  | membrane-associated ring finger (C3HC4) 3                                    | March3           | 0.769 | 0.999 | 0.764  | 0.022 | 0.464 | 0.091 | 1.360  | 0.977 |
| 1385790_at   | BF560024  | membrane-associated ring finger (C3HC4) 5 (predicted)                        | March5_predicted | 1.923 | 0.008 | 2.956  | 0.010 | 2.576 | 0.013 | 3.227  | 0.002 |
| 1388491_at   | AI234849  | membrane-associated ring finger (C3HC4) 5 (predicted)                        | March5_predicted | 1.650 | 0.015 | 1.464  | 0.028 | 2.255 | 0.003 | 2.095  | 0.013 |
| 1390485_at   | BI290680  | membrane-associated ring finger (C3HC4) 5 (predicted)                        | March5_predicted | 2.693 | 0.040 | 4.901  | 0.000 | 3.483 | 0.004 | 6.912  | 0.002 |
| 1373087_at   | AI175452  | Membrane-associated ring finger (C3HC4) 7                                    | March7           | 1.342 | 0.086 | 1.937  | 0.017 | 1.122 | 0.004 | 1.856  | 0.019 |
| 1381651_at   | BE100638  | Membrane-associated ring finger (C3HC4) 7                                    | March7           | 1.232 | 0.954 | 1.243  | 0.503 | 1.195 | 0.895 | 1.367  | 0.681 |
| 1398833_at   | NM_053569 | membrane-bound transcription factor peptidase, site 1                        | Mbtps1           | 0.754 | 0.031 | 0.587  | 0.004 | 0.698 | 0.039 | 0.695  | 0.004 |
| 1383621_at   | AW526365  | Membrane-bound transcription factor peptidase, site 2                        | Mbtps2           | 1.529 | 0.045 | 1.170  | 0.262 | 1.884 | 0.022 | 1.775  | 0.013 |
| 1381854_at   | BF418164  | Membrane-spanning 4-domains, subfamily A, member 8B (predicted)              | Ms4a8b_predicted | 1.529 | 0.098 | 0.521  | 0.088 | 1.001 | 0.302 | 0.509  | 0.084 |
| 1376359_at   | BG375355  | membrane-spanning 4-domains, subfamily A, member 8B (predicted)              | Ms4a8b_predicted | 1.427 | 0.204 | 1.531  | 0.049 | 0.698 | 0.176 | 0.853  | 0.289 |
| 1375956_at   | AI104569  | menage a trois 1                                                             | Mnat1            | 1.094 | 0.690 | 1.753  | 0.000 | 1.057 | 0.233 | 1.102  | 0.061 |
| 1370129_at   | NM_131904 | meningioma expressed antigen 5 (hyaluronidase)                               | Mgea5            | 3.234 | 0.019 | 9.749  | 0.005 | 1.133 | 0.765 | 6.054  | 0.000 |
| 1375217_at   | BI296680  | Meningioma expressed antigen 5 (hyaluronidase)                               | Mgea5            | 1.213 | 0.020 | 1.411  | 0.288 | 0.869 | 0.771 | 1.453  | 0.488 |
| 1395741_at   | BF548107  | Meningioma expressed antigen 5 (hyaluronidase)                               | Mgea5            | 1.717 | 0.143 | 0.550  | 0.119 | 0.999 | 0.514 | 0.580  | 0.002 |
| 1376009_at   | BI300199  | meningioma expressed antigen 6 (coiled-coil proline-rich) (predicted)        | Mgea6_predicted  | 0.815 | 0.126 | 0.985  | 0.217 | 0.828 | 0.313 | 1.145  | 0.844 |
| 1375452_at   | AI177180  | meningioma expressed antigen 6 (coiled-coil proline-rich) (predicted)        | Mgea6_predicted  | 0.817 | 0.539 | 1.257  | 0.046 | 1.060 | 0.604 | 1.346  | 0.105 |
| 1368236_at   | NM_013143 | mepri1 alpha                                                                 | Mep1a            | 0.989 | 0.899 | 0.922  | 0.896 | 0.991 | 0.995 | 1.007  | 0.469 |
| 1370811_at   | D50564    | mercaptopyruvate sulfurtransferase                                           | Mpst             | 0.708 | 0.685 | 0.576  | 0.323 | 0.747 | 0.210 | 0.980  | 0.789 |
| 1389178_at   | BE329043  | mesenchymal stem cell protein DSC92                                          | Ngrn             | 0.867 | 0.016 | 0.814  | 0.718 | 0.903 | 0.579 | 1.003  | 0.979 |
| 1371820_at   | BI282064  | mesoderm development candiate 2                                              | Mesdc2           | 0.926 | 0.836 | 1.124  | 0.217 | 1.377 | 0.779 | 1.451  | 0.008 |
| 1394616_at   | AI013798  | mesoderm development candiate 2                                              | Mesdc2           | 1.020 | 0.933 | 1.003  | 0.927 | 1.009 | 0.972 | 0.964  | 0.863 |
| 1377696_at   | AI407755  | mesoderm development candidate 1                                             | Mesdc1           | 1.578 | 0.405 | 0.836  | 0.941 | 2.145 | 0.033 | 1.652  | 0.624 |
| 1368441_at   | NM_031658 | mesothelin                                                                   | Msln             | 0.655 | 0.010 | 0.456  | 0.003 | 0.720 | 0.036 | 0.657  | 0.021 |
| 1374065_at   | BG378920  | Met proto-oncogene                                                           | Met              | 4.281 | 0.014 | 1.298  | 0.149 | 3.189 | 0.140 | 1.136  | 0.017 |
| 1370262_at   | AI706785  | metadherin                                                                   | Mtdh             | 0.728 | 0.524 | 1.429  | 0.002 | 0.776 | 0.067 | 1.207  | 0.252 |
| 1395194_at   | BF413525  | Metal response element binding transcription factor 1 (predicted)            | Mtf1_predicted   | 1.133 | 0.581 | 1.649  | 0.472 | 1.812 | 0.068 | 1.225  | 0.241 |
| 1391792_at   | BF398762  | Metal response element binding transcription factor 2                        | Mtf2             | 1.058 | 0.636 | 1.140  | 0.672 | 1.292 | 0.022 | 0.946  | 0.363 |
| 1391050_at   | BI294718  | metal response element binding transcription factor 2                        | Mtf2             | 1.041 | 0.721 | 0.963  | 0.834 | 0.719 | 0.704 | 0.962  | 0.606 |
| 1384516_at   | AI072919  | Metal response element binding transcription factor 2                        | Mtf2             | 0.962 | 0.901 | 0.972  | 0.098 | 1.112 | 0.839 | 1.087  | 0.445 |
| 1378394_at   | BE113263  | metallophosphoesterase 1 (predicted)                                         | Mppe1_predicted  | 1.713 | 0.045 | 0.822  | 0.089 | 4.676 | 0.007 | 1.416  | 0.004 |
| 1371237_a_at | AF411318  | metallothionein 1a                                                           | Mt1a             | 3.019 | 0.057 | 36.702 | 0.000 | 4.035 | 0.066 | 40.644 | 0.000 |
| 1388267_a_at | M24327    | metallothionein 1a                                                           | Mt1a             | 2.408 | 0.091 | 26.361 | 0.000 | 3.614 | 0.135 | 30.521 | 0.000 |
| 1389313_at   | AI137972  | Metastasis associated 1                                                      | Mta1             | 0.713 | 0.326 | 0.584  | 0.032 | 0.762 | 0.135 | 0.693  | 0.038 |
| 1385433_at   | AI576354  | metastasis suppressor 1 (predicted)                                          | Mtss1_predicted  | 1.190 | 0.064 | 13.180 | 0.018 | 0.793 | 0.085 | 6.242  | 0.035 |
| 1392086_at   | BE115673  | Metastasis suppressor 1 (predicted)                                          | Mtss1_predicted  | 1.037 | 0.412 | 1.567  | 0.043 | 1.036 | 0.396 | 0.971  | 0.443 |
| 1373103_at   | BM386922  | metastasis-associated gene family, member 2                                  | Mta2             | 0.980 | 0.901 | 1.004  | 0.560 | 1.184 | 0.418 | 1.166  | 0.497 |
| 1388766_at   | AI409049  | metaxin 2                                                                    | Mtx2             | 0.794 | 0.063 | 1.766  | 0.021 | 0.748 | 0.208 | 1.478  | 0.098 |
| 1389911_at   | BM389126  | meteorin, glial cell differentiation regulator-like                          | Metrl            | 0.478 | 0.056 | 0.455  | 0.073 | 0.387 | 0.022 | 0.612  | 0.099 |
| 1371031_at   | AI454484  | methionine adenosyltransferase I, alpha                                      | Mat1a            | 2.341 | 0.019 | 4.976  | 0.006 | 1.789 | 0.083 | 3.470  | 0.018 |
| 1398798_at   | NM_022539 | methionine aminopeptidase 2                                                  | Metap2           | 0.901 | 0.819 | 1.265  | 0.083 | 0.825 | 0.389 | 1.277  | 0.293 |
| 1372828_at   | BM389609  | methionine sulfoxide reductase B2                                            | Msrb2            | 0.622 | 0.510 | 1.095  | 0.670 | 1.066 | 0.585 | 0.908  | 0.480 |
| 1389733_at   | BM384125  | methionine-tRNA synthetase (predicted)                                       | Mars_predicted   | 0.855 | 0.055 | 0.940  | 0.247 | 0.680 | 0.022 | 0.949  | 0.878 |
| 1389634_at   | AI101470  | methionyl aminopeptidase 1 (predicted)                                       | Metap1_predicted | 1.395 | 0.301 | 1.932  | 0.006 | 0.854 | 0.670 | 1.561  | 0.024 |
| 1399137_at   | AW527547  | methionyl aminopeptidase 1 (predicted)                                       | Metap1_predicted | 0.905 | 0.725 | 0.748  | 0.018 | 0.868 | 0.066 | 0.649  | 0.048 |
| 1369277_at   | NM_022673 | methyl CpG binding protein 2                                                 | Mecp2            | 1.172 | 0.958 | 1.538  | 0.274 | 1.002 | 0.986 | 1.531  | 0.545 |
| 1395975_at   | AI235040  | Methyl CpG binding protein 2                                                 | Mecp2            | 1.276 | 0.971 | 0.904  | 0.879 | 1.856 | 0.157 | 0.886  | 0.920 |
| 1392885_at   | BF281957  | methyl-CpG binding domain protein 1                                          | Mbd1             | 0.952 | 0.145 | 1.241  | 0.090 | 1.191 | 0.903 | 1.471  | 0.018 |

|              |           |                                                                                                                                     |                       |       |       |       |       |       |       |       |       |
|--------------|-----------|-------------------------------------------------------------------------------------------------------------------------------------|-----------------------|-------|-------|-------|-------|-------|-------|-------|-------|
| 1381404_at   | AW524425  | Methyl-CpG binding domain protein 1                                                                                                 | Mbd1                  | 0.874 | 0.561 | 2.253 | 0.024 | 1.081 | 0.601 | 2.332 | 0.031 |
| 1375232_at   | BM388847  | methyl-CpG binding domain protein 6 (predicted)                                                                                     | Mbd6_predicted        | 1.138 | 0.487 | 0.902 | 0.214 | 1.042 | 0.689 | 0.977 | 0.809 |
| 1376852_at   | BI274460  | methylcrotonoyl-Coenzyme A carboxylase 1 (alpha)                                                                                    | Mccc1                 | 0.391 | 0.062 | 0.571 | 0.003 | 0.429 | 0.066 | 0.556 | 0.004 |
| 1377060_at   | AI410674  | methylcrotonoyl-Coenzyme A carboxylase 2 (beta)                                                                                     | Mccc2                 | 0.467 | 0.010 | 0.496 | 0.034 | 0.531 | 0.025 | 0.724 | 0.002 |
| 1368181_at   | NM_022508 | methylenetetrahydrofolate dehydrogenase (NADP+ dependent), methenyltetrahydrofolate cyclohydrolase, formyltetrahydrofolate synthase | Mthfd1                | 3.342 | 0.006 | 4.917 | 0.003 | 4.242 | 0.009 | 5.213 | 0.001 |
| 1377302_a_at | AI145027  | methylmalonic aciduria (cobalamin deficiency) cblA type (predicted)                                                                 | Mmaa_predicted        | 1.427 | 0.125 | 1.602 | 0.006 | 1.508 | 0.177 | 1.254 | 0.029 |
| 1376592_at   | BG379780  | methylmalonyl CoA epimerase (predicted)                                                                                             | Mcee_predicted        | 1.000 | 1.000 | 0.416 | 0.051 | 0.774 | 0.282 | 0.544 | 0.939 |
| 1379858_at   | AA955134  | methyltransferase like 2 (predicted)                                                                                                | Mettl2_predicted      | 0.569 | 0.181 | 1.380 | 0.035 | 0.698 | 0.153 | 1.624 | 0.012 |
| 1397176_at   | AI104417  | methyltransferase like 6                                                                                                            | Mettl6                | 1.198 | 0.343 | 1.097 | 0.637 | 1.816 | 0.028 | 1.300 | 0.111 |
| 1371479_at   | AA946026  | methyltransferase like 7A /// LOC500939                                                                                             | Mettl7a /// LOC500939 | 1.055 | 0.169 | 1.353 | 0.030 | 1.341 | 0.007 | 1.444 | 0.011 |
| 1376986_at   | BF412656  | methyltransferase-like 3                                                                                                            | Mettl3                | 0.894 | 0.943 | 1.172 | 0.002 | 0.923 | 0.243 | 1.018 | 0.094 |
| 1368020_at   | NM_031062 | mevalonate (diphospho) decarboxylase                                                                                                | Mvd                   | 0.782 | 0.451 | 2.687 | 0.002 | 0.433 | 0.924 | 0.919 | 0.218 |
| 1371770_at   | AW434268  | MHC class II region expressed gene KE2                                                                                              | Ke2                   | 0.611 | 0.645 | 1.411 | 0.081 | 0.823 | 0.610 | 1.453 | 0.128 |
| 1368528_at   | NM_134459 | MIC2 like 1                                                                                                                         | Mic2l1                | 0.893 | 0.105 | 0.446 | 0.003 | 0.900 | 0.125 | 0.548 | 0.034 |
| 1390063_at   | BG380473  | microfibrillar-associated protein 3                                                                                                 | Mfap3                 | 0.738 | 0.689 | 0.377 | 0.015 | 0.483 | 0.103 | 0.701 | 0.522 |
| 1398185_at   | BF410350  | microfibrillar-associated protein 3-like                                                                                            | Mfap3l                | 0.855 | 0.266 | 0.618 | 0.107 | 2.867 | 0.130 | 0.638 | 0.010 |
| 1397032_at   | BF404482  | Microrchidia 3 (predicted)                                                                                                          | Morc3_predicted       | 1.157 | 0.097 | 1.082 | 0.904 | 1.238 | 0.061 | 0.999 | 0.936 |
| 1367612_at   | NM_134349 | microsomal glutathione S-transferase 1                                                                                              | Mgst1                 | 0.960 | 0.188 | 1.252 | 0.152 | 0.477 | 0.022 | 1.044 | 0.708 |
| 1372599_at   | BI290559  | microsomal glutathione S-transferase 2 (predicted)                                                                                  | Mgst2_predicted       | 0.955 | 0.741 | 2.460 | 0.018 | 1.002 | 0.988 | 1.106 | 0.285 |
| 1372413_at   | BI278800  | microspherule protein 1                                                                                                             | Mcrs1                 | 1.289 | 0.142 | 1.221 | 0.119 | 1.075 | 0.853 | 0.793 | 0.478 |
| 1388399_at   | BE106597  | microtubule associated serine/threonine kinase 2 (predicted)                                                                        | Mast2_predicted       | 1.232 | 0.058 | 2.097 | 0.009 | 1.581 | 0.111 | 1.281 | 0.060 |
| 1367882_at   | NM_030995 | microtubule-associated protein 1 A                                                                                                  | Mtap1a                | 0.455 | 0.008 | 0.517 | 0.057 | 0.354 | 0.003 | 0.662 | 0.068 |
| 1371682_at   | AI177372  | microtubule-associated protein 1 light chain 3 alpha                                                                                | Map1lc3a              | 0.755 | 0.031 | 0.879 | 0.235 | 0.771 | 0.085 | 0.710 | 0.318 |
| 1382199_at   | BF288776  | Microtubule-associated protein 1 light chain 3 beta                                                                                 | Map1lc3b              | 1.085 | 0.525 | 1.557 | 0.174 | 0.918 | 0.286 | 0.692 | 0.129 |
| 1367669_a_at | AI233190  | microtubule-associated protein 1 light chain 3 beta                                                                                 | Map1lc3b              | 0.715 | 0.682 | 1.628 | 0.225 | 0.533 | 0.268 | 1.137 | 0.130 |
| 1373363_at   | BI281702  | microtubule-associated protein 1b                                                                                                   | Map1b                 | 1.330 | 0.145 | 1.194 | 0.100 | 1.080 | 0.563 | 1.062 | 0.032 |
| 1395172_at   | BE096402  | Microtubule-associated protein 1b                                                                                                   | Map1b                 | 1.622 | 0.164 | 1.540 | 0.142 | 1.471 | 0.104 | 0.898 | 0.410 |
| 1395357_at   | BG672052  | microtubule-associated protein 1b                                                                                                   | Map1b                 | 3.397 | 0.274 | 0.939 | 0.624 | 1.197 | 0.364 | 0.535 | 0.121 |
| 1371003_at   | BG378086  | microtubule-associated protein 1b                                                                                                   | Map1b                 | 0.962 | 0.318 | 1.861 | 0.018 | 0.622 | 0.061 | 1.497 | 0.068 |
| 1368411_a_at | X74211    | microtubule-associated protein 2                                                                                                    | Mtap2                 | 0.816 | 0.012 | 0.602 | 0.103 | 0.687 | 0.013 | 0.546 | 0.090 |
| 1388152_at   | BG374290  | microtubule-associated protein 2                                                                                                    | Mtap2                 | 0.361 | 0.031 | 0.332 | 0.000 | 0.397 | 0.007 | 0.349 | 0.005 |
| 1373268_at   | BM383953  | microtubule-associated protein 4                                                                                                    | LOC367171             | 0.897 | 0.878 | 1.101 | 0.449 | 0.835 | 0.037 | 0.865 | 0.125 |
| 1371607_at   | AI230787  | microtubule-associated protein 4                                                                                                    | LOC367171             | 1.014 | 0.879 | 0.624 | 0.026 | 0.915 | 0.122 | 0.650 | 0.045 |
| 1371087_a_at | AJ002556  | microtubule-associated protein 6                                                                                                    | Mtap6                 | 0.714 | 0.098 | 0.980 | 0.080 | 0.820 | 0.083 | 0.992 | 0.163 |
| 1368345_at   | NM_017204 | microtubule-associated protein 6                                                                                                    | Mtap6                 | 0.712 | 0.211 | 0.987 | 0.947 | 0.897 | 0.627 | 0.774 | 0.159 |
| 1376907_at   | AW521452  | Microtubule-associated protein 6                                                                                                    | Mtap6                 | 0.998 | 0.989 | 0.938 | 0.160 | 0.865 | 0.162 | 0.973 | 0.780 |
| 1392916_at   | BM386695  | microtubule-associated protein 7 (predicted)                                                                                        | Mtap7_predicted       | 1.351 | 0.024 | 0.847 | 0.018 | 0.977 | 0.610 | 0.824 | 0.044 |
| 1380120_at   | BG374192  | microtubule-associated protein 7 (predicted)                                                                                        | Mtap7_predicted       | 1.763 | 0.065 | 2.195 | 0.033 | 1.188 | 0.511 | 1.284 | 0.111 |
| 1383719_at   | AW531489  | microtubule-associated protein 7 (predicted)                                                                                        | Mtap7_predicted       | 1.328 | 0.433 | 0.939 | 0.313 | 1.342 | 0.470 | 1.026 | 0.655 |
| 1397364_at   | AW521314  | Microtubule-associated protein tau                                                                                                  | Mapt                  | 1.011 | 0.981 | 0.796 | 0.763 | 1.004 | 0.968 | 0.944 | 0.890 |
| 1387071_a_at | BE107978  | microtubule-associated protein tau /// hypothetical gene supported by NM_017212                                                     | Mapt /// LOC497674    | 0.513 | 0.022 | 1.013 | 0.078 | 0.553 | 0.015 | 0.820 | 0.374 |
| 1368137_at   | NM_017212 | microtubule-associated protein tau /// hypothetical gene supported by NM_017212                                                     | Mapt /// LOC497674    | 1.491 | 0.127 | 0.998 | 0.986 | 0.897 | 0.915 | 0.704 | 0.698 |
| 1375525_at   | BI294783  | microtubule-associated protein, RP/EB family, member 1                                                                              | Mapre1                | 0.758 | 0.061 | 1.186 | 0.061 | 0.750 | 0.051 | 1.038 | 0.127 |
| 1370792_at   | U75920    | microtubule-associated protein, RP/EB family, member 1                                                                              | Mapre1                | 0.931 | 0.478 | 1.733 | 0.284 | 0.995 | 0.952 | 1.677 | 0.152 |
| 1373397_at   | AI180161  | microtubule-associated protein, RP/EB family, member 1                                                                              | Mapre1                | 0.890 | 0.989 | 3.230 | 0.002 | 0.659 | 0.201 | 1.926 | 0.006 |
| 1374062_x_at | AA946204  | microtubule-associated protein, RP/EB family, member 3                                                                              | Mapre3                | 0.367 | 0.000 | 0.469 | 0.000 | 0.395 | 0.070 | 0.398 | 0.038 |
| 1372091_at   | BI275959  | MID1 interacting G12-like protein                                                                                                   | Mig12                 | 0.533 | 0.093 | 0.697 | 0.005 | 0.481 | 0.029 | 0.644 | 0.008 |
| 1379417_at   | AA956668  | midasin homolog (yeast)                                                                                                             | Mdn1                  | 0.817 | 0.520 | 1.474 | 0.008 | 0.779 | 0.285 | 1.306 | 0.044 |
| 1389303_at   | AI411019  | MIF4G domain containing                                                                                                             | Mif4gd                | 0.971 | 0.829 | 0.988 | 0.847 | 0.611 | 0.988 | 0.986 | 0.830 |
| 1397745_at   | BF414336  | Mindbomb homolog 1 (Drosophila) (predicted)                                                                                         | Mib1_predicted        | 0.948 | 0.885 | 0.984 | 0.879 | 1.082 | 0.714 | 1.008 | 0.953 |
| 1381298_at   | AI103253  | Minichromosome maintenance deficient 10 (S. cerevisiae) (predicted)                                                                 | Mcm10_predicted       | 0.719 | 0.145 | 0.987 | 0.301 | 1.120 | 0.363 | 1.000 | 0.303 |
| 1374053_at   | AI235774  | minichromosome maintenance deficient 3 (S. cerevisiae) associated protein (predicted)                                               | Mcm3ap_predicted      | 0.936 | 0.993 | 1.266 | 0.023 | 1.160 | 0.259 | 1.145 | 0.232 |
| 1388744_at   | AI599678  | minichromosome maintenance deficient 7 (S. cerevisiae)                                                                              | Mcm7                  | 0.338 | 0.015 | 2.227 | 0.021 | 0.778 | 0.048 | 2.152 | 0.037 |
| 1385819_at   | BF287803  | misato homolog 1 (Drosophila) (predicted)                                                                                           | Msto1_predicted       | 0.636 | 0.212 | 1.089 | 0.517 | 0.984 | 0.164 | 1.121 | 0.100 |
| 1373929_at   | BI279787  | mitochondrial ribosomal protein S7                                                                                                  | Mrps7                 | 0.634 | 0.592 | 1.162 | 0.918 | 0.557 | 0.094 | 0.846 | 0.146 |
| 1384115_at   | BF555448  | Mitochondrial acyl-CoA thioesterase 1                                                                                               | Mte1                  | 0.657 | 0.043 | 1.532 | 0.001 | 0.711 | 0.016 | 1.230 | 0.022 |
| 1391433_at   | AA899721  | mitochondrial acyl-CoA thioesterase 1                                                                                               | Mte1                  | 0.604 | 0.049 | 1.373 | 0.110 | 0.646 | 0.008 | 1.037 | 0.693 |
| 1382446_at   | AA799829  | mitochondrial ATP synthase regulatory component factor B                                                                            | Atp5s                 | 0.500 | 0.087 | 1.391 | 0.058 | 0.655 | 0.119 | 1.004 | 0.991 |
| 1382688_at   | AI229706  | Mitochondrial carrier domain containing protein RGD1359361                                                                          | RGD1359361            | 1.701 | 0.081 | 6.591 | 0.000 | 1.145 | 0.981 | 2.025 | 0.020 |
| 1371474_at   | BG665132  | mitochondrial carrier homolog 1 (C. elegans)                                                                                        | Mtch1                 | 0.616 | 0.006 | 0.729 | 0.024 | 0.661 | 0.008 | 0.733 | 0.027 |

|              |           |                                                                                      |                                   |       |       |       |       |       |       |       |       |
|--------------|-----------|--------------------------------------------------------------------------------------|-----------------------------------|-------|-------|-------|-------|-------|-------|-------|-------|
| 1372566_at   | AI412014  | mitochondrial carrier homolog 2 (C. elegans) (predicted)                             | Mtch2_predicted                   | 0.559 | 0.312 | 0.400 | 0.057 | 0.622 | 0.134 | 0.342 | 0.015 |
| 1375131_at   | BF284715  | mitochondrial carrier homolog 2 (C. elegans) (predicted)                             | Mtch2_predicted                   | 0.871 | 0.944 | 1.685 | 0.010 | 0.839 | 0.044 | 1.538 | 0.013 |
| 1379456_at   | AA957383  | mitochondrial carrier triple repeat 1                                                | Mcart1                            | 0.810 | 0.087 | 0.971 | 0.528 | 0.342 | 0.005 | 0.935 | 0.479 |
| 1386478_at   | H33101    | mitochondrial carrier triple repeat 1                                                | Mcart1                            | 0.657 | 0.131 | 0.844 | 0.224 | 0.597 | 0.024 | 0.818 | 0.071 |
| 1393239_at   | BI296413  | Mitochondrial fission regulator 1 (predicted)                                        | Mtfr1_predicted                   | 1.119 | 0.492 | 1.443 | 0.010 | 1.325 | 0.052 | 1.437 | 0.017 |
| 1369023_at   | NM_031052 | mitochondrial intermediate peptidase                                                 | Mipep                             | 1.002 | 0.944 | 0.813 | 0.143 | 0.999 | 0.998 | 0.998 | 0.337 |
| 1377096_at   | AW251803  | mitochondrial methionyl-tRNA formyltransferase                                       | Mtfmt                             | 0.924 | 0.777 | 0.578 | 0.023 | 0.689 | 0.164 | 0.511 | 0.073 |
| 1388661_at   | AA943734  | mitochondrial protein, 18 kDa                                                        | MGC94604                          | 0.542 | 0.022 | 2.159 | 0.128 | 0.289 | 0.098 | 1.715 | 0.082 |
| 1389125_at   | BI293704  | mitochondrial ribosomal protein L1 (predicted)                                       | Mrpl1_predicted                   | 1.065 | 0.800 | 1.299 | 0.095 | 0.625 | 0.049 | 1.261 | 0.179 |
| 1367506_at   | BF283488  | mitochondrial ribosomal protein L11                                                  | mrpl11                            | 0.998 | 0.983 | 0.867 | 0.233 | 0.877 | 0.123 | 0.848 | 0.100 |
| 1388931_at   | AA799440  | mitochondrial ribosomal protein L13                                                  | Mrpl13                            | 0.569 | 0.452 | 0.822 | 0.544 | 0.492 | 0.002 | 0.703 | 0.265 |
| 1372597_at   | BE113348  | mitochondrial ribosomal protein L14 (predicted)                                      | Mrpl14_predicted                  | 2.321 | 0.114 | 4.606 | 0.044 | 3.920 | 0.032 | 4.764 | 0.017 |
| 1395063_at   | AA851300  | Mitochondrial ribosomal protein L14 (predicted)                                      | Mrpl14_predicted                  | 1.282 | 0.197 | 1.036 | 0.256 | 1.401 | 0.161 | 1.413 | 0.192 |
| 1398891_at   | AI103129  | mitochondrial ribosomal protein L15 (predicted)                                      | Mrpl15_predicted                  | 0.794 | 0.702 | 1.307 | 0.142 | 0.570 | 0.014 | 1.272 | 0.038 |
| 1371967_at   | AI410349  | mitochondrial ribosomal protein L16                                                  | Mrpl16                            | 0.681 | 0.056 | 1.062 | 0.589 | 0.492 | 0.004 | 1.153 | 0.587 |
| 1369013_a_at | AI103095  | mitochondrial ribosomal protein L17                                                  | Mrpl17                            | 0.780 | 0.173 | 1.201 | 0.001 | 0.797 | 0.254 | 1.152 | 0.076 |
| 1394722_at   | AA964121  | mitochondrial ribosomal protein L17                                                  | Mrpl17                            | 0.933 | 0.192 | 0.858 | 0.068 | 0.820 | 0.038 | 1.025 | 0.907 |
| 1399058_at   | BI288800  | mitochondrial ribosomal protein L18 (predicted)                                      | Mrpl18_predicted                  | 0.620 | 0.458 | 0.789 | 0.547 | 0.404 | 0.007 | 0.905 | 0.486 |
| 1396808_at   | AI501314  | Mitochondrial ribosomal protein L18 (predicted)                                      | Mrpl18_predicted                  | 1.296 | 0.504 | 0.801 | 0.391 | 1.297 | 0.236 | 0.736 | 0.080 |
| 1398911_at   | AI171870  | mitochondrial ribosomal protein L2                                                   | Mrpl2                             | 0.854 | 0.046 | 1.047 | 0.840 | 0.683 | 0.182 | 0.905 | 0.294 |
| 1367502_at   | BI287857  | mitochondrial ribosomal protein L21 (predicted)                                      | Mrpl21_predicted                  | 0.582 | 0.635 | 1.435 | 0.040 | 0.763 | 0.106 | 0.937 | 0.215 |
| 1388860_at   | AI175327  | mitochondrial ribosomal protein L22 (predicted)                                      | Mrpl22_predicted                  | 0.667 | 0.280 | 1.078 | 0.550 | 0.556 | 0.157 | 1.188 | 0.013 |
| 1368004_at   | NM_022529 | mitochondrial ribosomal protein L23                                                  | Mrpl23                            | 0.558 | 0.504 | 1.321 | 0.121 | 0.501 | 0.008 | 0.978 | 0.430 |
| 1371888_at   | AA892843  | mitochondrial ribosomal protein L24                                                  | mrpl24                            | 1.022 | 0.151 | 2.498 | 0.007 | 0.766 | 0.055 | 1.741 | 0.015 |
| 1399047_at   | BF283001  | mitochondrial ribosomal protein L27 (predicted)                                      | Mrpl27_predicted                  | 0.669 | 0.543 | 1.969 | 0.028 | 0.478 | 0.060 | 1.974 | 0.029 |
| 1371709_at   | BI279024  | mitochondrial ribosomal protein L3 (predicted)                                       | Mrpl3_predicted                   | 0.852 | 0.833 | 1.615 | 0.036 | 0.923 | 0.803 | 1.507 | 0.036 |
| 1398983_at   | AW435012  | mitochondrial ribosomal protein L30 (predicted)                                      | Mrpl30_predicted                  | 0.859 | 0.296 | 1.357 | 0.056 | 0.859 | 0.312 | 1.181 | 0.208 |
| 1389327_at   | BF282675  | mitochondrial ribosomal protein L32 (predicted)                                      | Mrpl32_predicted                  | 0.816 | 0.250 | 0.985 | 0.354 | 1.030 | 0.135 | 0.965 | 0.692 |
| 1371604_at   | AA858969  | mitochondrial ribosomal protein L34                                                  | Mrpl34                            | 0.562 | 0.185 | 0.934 | 0.095 | 0.340 | 0.001 | 0.940 | 0.635 |
| 1371955_at   | BF408394  | mitochondrial ribosomal protein L35 (predicted)                                      | Mrpl35_predicted                  | 0.546 | 0.382 | 0.875 | 0.249 | 0.474 | 0.022 | 1.123 | 0.044 |
| 1371553_at   | BF288120  | mitochondrial ribosomal protein L36 (predicted)                                      | Mrpl36_predicted                  | 0.189 | 0.018 | 0.544 | 0.029 | 0.312 | 0.004 | 0.575 | 0.082 |
| 1398921_at   | BE110549  | mitochondrial ribosomal protein L37                                                  | Mrpl37                            | 0.578 | 0.324 | 1.219 | 0.415 | 1.263 | 0.664 | 1.737 | 0.045 |
| 1383618_at   | BG378538  | mitochondrial ribosomal protein L38                                                  | Mrpl38                            | 0.609 | 0.227 | 2.447 | 0.006 | 0.840 | 0.133 | 1.944 | 0.014 |
| 1388366_at   | BI275903  | mitochondrial ribosomal protein L4 (predicted)                                       | Mrpl4_predicted                   | 0.613 | 0.093 | 1.036 | 0.395 | 0.592 | 0.078 | 1.117 | 0.337 |
| 1388517_at   | AI599474  | mitochondrial ribosomal protein L40                                                  | Mrpl40                            | 0.398 | 0.190 | 0.881 | 0.651 | 0.292 | 0.009 | 0.881 | 0.909 |
| 1374931_at   | AA943496  | mitochondrial ribosomal protein L40                                                  | Mrpl40                            | 0.928 | 0.312 | 0.852 | 0.066 | 1.053 | 0.698 | 1.145 | 0.930 |
| 1371423_at   | AA800010  | mitochondrial ribosomal protein L41                                                  | Mrpl41                            | 0.605 | 0.032 | 0.706 | 0.030 | 0.767 | 0.047 | 0.756 | 0.026 |
| 1371853_at   | AI176602  | mitochondrial ribosomal protein L42 (predicted) /// similar to RIKEN cDNA 2900055D03 | Mrpl42_predicted ///<br>LOC367117 | 0.431 | 0.014 | 0.654 | 0.070 | 0.362 | 0.008 | 0.730 | 0.768 |
| 1367546_at   | BM390298  | mitochondrial ribosomal protein L43 (predicted)                                      | Mrpl43_predicted                  | 0.747 | 0.248 | 1.751 | 0.055 | 0.790 | 0.238 | 1.491 | 0.290 |
| 1383157_at   | AW520344  | mitochondrial ribosomal protein L44                                                  | Mrpl44                            | 0.604 | 0.079 | 1.369 | 0.566 | 0.623 | 0.011 | 1.264 | 0.323 |
| 1371790_at   | BI277658  | mitochondrial ribosomal protein L45 (predicted)                                      | Mrpl45_predicted                  | 0.686 | 0.091 | 2.275 | 0.058 | 0.996 | 0.253 | 1.203 | 0.236 |
| 1373155_at   | BI283167  | mitochondrial ribosomal protein L46                                                  | Mrpl46                            | 0.723 | 0.440 | 1.912 | 0.040 | 0.626 | 0.032 | 1.663 | 0.107 |
| 1382144_at   | AW520527  | mitochondrial ribosomal protein L47                                                  | Mrpl47                            | 0.491 | 0.137 | 1.329 | 0.160 | 0.363 | 0.001 | 1.362 | 0.186 |
| 1379306_at   | BE111794  | mitochondrial ribosomal protein L48 (predicted)                                      | Mrpl48_predicted                  | 0.906 | 0.410 | 0.734 | 0.047 | 0.827 | 0.089 | 0.784 | 0.064 |
| 1371586_at   | AF209972  | mitochondrial ribosomal protein L48 (predicted)                                      | Mrpl48_predicted                  | 0.762 | 0.549 | 1.576 | 0.051 | 0.633 | 0.110 | 1.083 | 0.183 |
| 1372619_at   | AI172185  | mitochondrial ribosomal protein L49                                                  | Mrpl49                            | 0.384 | 0.064 | 0.333 | 0.009 | 0.242 | 0.039 | 0.354 | 0.071 |
| 1372927_at   | AA891839  | mitochondrial ribosomal protein L50 (predicted)                                      | Mrpl50_predicted                  | 0.528 | 0.118 | 0.531 | 0.011 | 0.565 | 0.000 | 0.631 | 0.026 |
| 1376585_at   | BF395602  | mitochondrial ribosomal protein L50 (predicted)                                      | Mrpl50_predicted                  | 0.981 | 0.466 | 1.030 | 0.198 | 0.993 | 0.853 | 0.805 | 0.238 |
| 1390188_at   | BF419327  | mitochondrial ribosomal protein L51 (predicted)                                      | Mrpl51_predicted                  | 0.577 | 0.048 | 1.236 | 0.189 | 0.567 | 0.020 | 1.342 | 0.045 |
| 1374411_at   | BF414649  | Mitochondrial ribosomal protein L52 (predicted)                                      | Mrpl52_predicted                  | 0.517 | 0.503 | 1.406 | 0.197 | 0.532 | 0.102 | 1.039 | 0.590 |
| 1388654_at   | AI409180  | Mitochondrial ribosomal protein L52 (predicted)                                      | Mrpl52_predicted                  | 0.786 | 0.612 | 0.502 | 0.017 | 0.641 | 0.395 | 0.583 | 0.033 |
| 1367477_at   | BM386162  | mitochondrial ribosomal protein L53 (predicted)                                      | Mrpl53_predicted                  | 0.761 | 0.665 | 1.220 | 0.390 | 0.764 | 0.138 | 1.082 | 0.349 |
| 1388853_at   | BI285231  | mitochondrial ribosomal protein L54 (predicted)                                      | Mrpl54_predicted                  | 0.999 | 0.988 | 1.662 | 0.052 | 1.238 | 0.247 | 1.486 | 0.061 |
| 1375161_at   | BM386389  | mitochondrial ribosomal protein L55 (predicted)                                      | Mrpl55_predicted                  | 0.476 | 0.456 | 0.657 | 0.235 | 0.679 | 0.149 | 0.706 | 0.447 |
| 1398912_at   | BM389259  | mitochondrial ribosomal protein L9                                                   | mrpl9                             | 1.031 | 0.331 | 1.762 | 0.026 | 0.812 | 0.410 | 1.767 | 0.142 |
| 1372128_at   | BI294944  | mitochondrial ribosomal protein S12 (predicted)                                      | Mrps12_predicted                  | 0.628 | 0.243 | 0.818 | 0.532 | 0.672 | 0.098 | 1.039 | 0.799 |
| 1377937_at   | AA859719  | mitochondrial ribosomal protein S14 (predicted)                                      | Mrps14_predicted                  | 0.702 | 0.027 | 0.630 | 0.013 | 0.680 | 0.018 | 1.002 | 0.241 |
| 1383090_at   | BF548676  | mitochondrial ribosomal protein S14 (predicted)                                      | Mrps14_predicted                  | 0.755 | 0.137 | 1.136 | 0.545 | 0.672 | 0.087 | 1.188 | 0.110 |
| 1372697_at   | AW254612  | mitochondrial ribosomal protein S15                                                  | Mrps15                            | 0.384 | 0.138 | 1.056 | 0.438 | 0.315 | 0.001 | 0.926 | 0.923 |
| 1399002_at   | BM384239  | mitochondrial ribosomal protein S17 (predicted)                                      | Mrps17_predicted                  | 0.722 | 0.185 | 0.481 | 0.020 | 0.648 | 0.040 | 0.657 | 0.353 |



|              |           |                                                                                                                                |                                              |       |       |       |       |       |       |       |       |
|--------------|-----------|--------------------------------------------------------------------------------------------------------------------------------|----------------------------------------------|-------|-------|-------|-------|-------|-------|-------|-------|
| 1371591_at   | AA858667  | mitochondrial ribosomal protein S18A                                                                                           | Mrps18a                                      | 1.010 | 0.974 | 0.953 | 0.433 | 0.610 | 0.062 | 0.856 | 0.286 |
| 1371809_at   | BM389296  | mitochondrial ribosomal protein S18B                                                                                           | Mrps18b                                      | 0.923 | 0.923 | 4.527 | 0.000 | 1.249 | 0.150 | 3.436 | 0.002 |
| 1379378_at   | AI071605  | mitochondrial ribosomal protein S18C (predicted)                                                                               | Mrps18c_predicted                            | 0.487 | 0.163 | 1.103 | 0.068 | 0.442 | 0.130 | 1.284 | 0.050 |
| 1380447_a_at | AI071722  | mitochondrial ribosomal protein S18C (predicted)                                                                               | Mrps18c_predicted                            | 1.011 | 0.222 | 1.776 | 0.000 | 0.535 | 0.019 | 1.537 | 0.007 |
| 1372116_at   | AI008955  | Mitochondrial ribosomal protein S2 (predicted)                                                                                 | Mrps2_predicted                              | 0.499 | 0.001 | 1.183 | 0.107 | 0.284 | 0.020 | 1.152 | 0.076 |
| 1373609_at   | AI232274  | mitochondrial ribosomal protein S21 (predicted) /// similar to chromosome 1 open reading frame 51 (predicted)                  | Mrps21_predicted ///<br>RGD1559569_predicted | 0.665 | 0.304 | 0.540 | 0.006 | 0.708 | 0.009 | 0.651 | 0.033 |
| 1371661_at   | AI411153  | mitochondrial ribosomal protein S23 (predicted)                                                                                | Mrps23_predicted                             | 0.893 | 0.863 | 0.935 | 0.664 | 1.063 | 0.860 | 1.030 | 0.367 |
| 1388910_at   | BI285944  | mitochondrial ribosomal protein S24 (predicted)                                                                                | Mrps24_predicted                             | 1.023 | 0.887 | 2.274 | 0.061 | 1.063 | 0.459 | 1.751 | 0.001 |
| 1371548_at   | BI289416  | mitochondrial ribosomal protein S25                                                                                            | Mrps25                                       | 0.855 | 0.598 | 1.006 | 0.958 | 0.680 | 0.016 | 1.041 | 0.362 |
| 1367526_at   | AI180224  | mitochondrial ribosomal protein S26 (predicted)                                                                                | Mrps26_predicted                             | 0.420 | 0.004 | 0.822 | 0.038 | 0.395 | 0.032 | 0.642 | 0.074 |
| 1372916_at   | BI295139  | mitochondrial ribosomal protein S27 (predicted)                                                                                | Mrps27_predicted                             | 0.402 | 0.099 | 1.149 | 0.242 | 0.321 | 0.105 | 0.820 | 0.354 |
| 1384579_at   | AA901191  | Mitochondrial ribosomal protein S27 (predicted)                                                                                | Mrps27_predicted                             | 1.219 | 0.261 | 0.979 | 0.782 | 1.669 | 0.021 | 1.329 | 0.110 |
| 1373069_at   | BG378230  | mitochondrial ribosomal protein S30 (predicted)                                                                                | Mrps30_predicted                             | 0.572 | 0.025 | 1.415 | 0.136 | 0.391 | 0.005 | 1.333 | 0.160 |
| 1372214_at   | AI104277  | mitochondrial ribosomal protein S33 (predicted)                                                                                | Mrps33_predicted                             | 0.393 | 0.135 | 0.737 | 0.120 | 0.349 | 0.019 | 0.818 | 0.150 |
| 1371608_at   | BI275958  | mitochondrial ribosomal protein S34 (predicted)                                                                                | Mrps34_predicted                             | 1.191 | 0.654 | 2.401 | 0.017 | 1.816 | 0.041 | 2.868 | 0.003 |
| 1372839_at   | BG379352  | mitochondrial ribosomal protein S35 (predicted)                                                                                | Mrps35_predicted                             | 0.477 | 0.071 | 1.053 | 0.147 | 0.423 | 0.044 | 0.979 | 0.169 |
| 1371576_at   | AW142276  | mitochondrial ribosomal protein S36 (predicted)                                                                                | Mrps36_predicted                             | 0.447 | 0.001 | 0.735 | 0.116 | 0.455 | 0.006 | 0.836 | 0.073 |
| 1388877_at   | BM386940  | mitochondrial ribosomal protein S5 (predicted)                                                                                 | Mrps5_predicted                              | 0.665 | 0.026 | 0.954 | 0.443 | 0.731 | 0.055 | 1.263 | 0.383 |
| 1396142_at   | BI274476  | mitochondrial ribosomal protein S9                                                                                             | Mrps9                                        | 0.734 | 0.457 | 0.623 | 0.457 | 0.778 | 0.452 | 0.588 | 0.149 |
| 1373002_at   | AI009481  | mitochondrial ribosomal protein S9                                                                                             | Mrps9                                        | 0.809 | 0.506 | 1.047 | 0.778 | 0.589 | 0.026 | 1.032 | 0.315 |
| 1396227_at   | BG374845  | mitochondrial ribosome recycling factor                                                                                        | Mrrf                                         | 0.816 | 0.232 | 1.008 | 0.518 | 0.733 | 0.167 | 0.722 | 0.105 |
| 1376415_at   | BE114114  | mitochondrial ribosome recycling factor                                                                                        | Mrrf                                         | 0.665 | 0.977 | 1.322 | 0.229 | 0.557 | 0.299 | 1.141 | 0.590 |
| 1398252_at   | NM_017209 | mitochondrial trans-2-enoyl-CoA reductase                                                                                      | Mecr                                         | 0.759 | 0.120 | 0.997 | 0.986 | 0.759 | 0.211 | 0.997 | 0.990 |
| 1387732_at   | NM_053499 | mitochondrial transcription termination factor 1                                                                               | Mterf                                        | 1.468 | 0.104 | 2.102 | 0.001 | 1.248 | 0.264 | 2.021 | 0.022 |
| 1377493_at   | BM386301  | mitochondrial translation optimization 1 homolog (S. cerevisiae) (predicted)                                                   | Mto1_predicted                               | 0.498 | 0.062 | 2.589 | 0.021 | 0.282 | 0.011 | 3.249 | 0.014 |
| 1384314_at   | BM383771  | mitochondrial translational initiation factor 2                                                                                | Mtif2                                        | 1.436 | 0.003 | 1.015 | 0.758 | 1.655 | 0.175 | 0.980 | 0.313 |
| 1392654_at   | BF413389  | mitochondrial translational release factor 1-like (predicted) /// similar to mitochondrial translational release factor 1-like | Mtrf11_predicted ///<br>LOC361473            | 1.062 | 0.661 | 1.104 | 0.947 | 1.168 | 0.326 | 1.106 | 0.577 |
| 1372457_at   | BF284182  | mitochondrial tumor suppressor 1                                                                                               | Mtus1                                        | 0.852 | 0.130 | 0.338 | 0.023 | 0.519 | 0.022 | 0.417 | 0.012 |
| 1376058_at   | AI705731  | mitochondrial tumor suppressor 1                                                                                               | Mtus1                                        | 0.735 | 0.605 | 1.063 | 0.364 | 0.398 | 0.055 | 0.838 | 0.861 |
| 1380321_at   | BI287786  | mitochondrial tumor suppressor 1                                                                                               | Mtus1                                        | 1.112 | 0.687 | 0.480 | 0.008 | 0.693 | 0.382 | 0.485 | 0.047 |
| 1387919_at   | U41803    | mitofusin 2                                                                                                                    | Mfn2                                         | 1.234 | 0.038 | 1.516 | 0.004 | 0.755 | 0.062 | 1.108 | 0.013 |
| 1380238_at   | BE117357  | Mitogen activated protein kinase 14                                                                                            | Mapk14                                       | 1.163 | 0.410 | 1.303 | 0.915 | 1.235 | 0.661 | 1.255 | 0.764 |
| 1367697_at   | NM_031020 | mitogen activated protein kinase 14                                                                                            | Mapk14                                       | 1.139 | 0.789 | 1.227 | 0.016 | 0.986 | 0.926 | 0.962 | 0.530 |
| 1387771_a_at | AF155236  | mitogen activated protein kinase 3                                                                                             | Mapk3                                        | 1.373 | 0.305 | 1.316 | 0.115 | 0.839 | 0.402 | 0.806 | 0.294 |
| 1387971_a_at | AF092450  | mitogen activated protein kinase 8 interacting protein                                                                         | Mapk8ip                                      | 1.005 | 0.300 | 0.502 | 0.049 | 0.578 | 0.180 | 0.554 | 0.005 |
| 1386973_a_at | NM_053777 | mitogen activated protein kinase 8 interacting protein                                                                         | Mapk8ip                                      | 0.511 | 0.428 | 0.714 | 0.033 | 0.582 | 0.013 | 0.672 | 0.033 |
| 1367760_at   | D13341    | mitogen activated protein kinase kinase 1                                                                                      | Map2k1                                       | 0.879 | 0.447 | 1.403 | 0.011 | 0.976 | 0.570 | 1.327 | 0.055 |
| 1398834_at   | D14592    | mitogen activated protein kinase kinase 2                                                                                      | Map2k2                                       | 0.630 | 0.012 | 0.624 | 0.027 | 0.563 | 0.017 | 0.727 | 0.022 |
| 1388858_at   | BI283843  | mitogen activated protein kinase kinase 3                                                                                      | Map2k3                                       | 1.789 | 0.200 | 2.190 | 0.013 | 1.260 | 0.168 | 1.548 | 0.160 |
| 1377621_at   | AI413033  | Mitogen activated protein kinase kinase 4                                                                                      | Map2k4                                       | 1.055 | 0.133 | 0.982 | 0.778 | 0.986 | 0.799 | 0.943 | 0.599 |
| 1386959_a_at | NM_017246 | mitogen activated protein kinase kinase 5                                                                                      | Map2k5                                       | 0.677 | 0.312 | 0.697 | 0.029 | 0.767 | 0.237 | 0.794 | 0.577 |
| 1390372_at   | BF521975  | Mitogen activated protein kinase kinase kinase 12                                                                              | Map3k12                                      | 0.702 | 0.076 | 0.511 | 0.033 | 0.754 | 0.042 | 0.540 | 0.019 |
| 1368886_at   | NM_013055 | mitogen activated protein kinase kinase kinase 12                                                                              | Map3k12                                      | 0.886 | 0.199 | 0.638 | 0.005 | 0.884 | 0.548 | 0.497 | 0.002 |
| 1377607_at   | BM385631  | mitogen activated protein kinase kinase kinase 3 (predicted)                                                                   | Map3k3_predicted                             | 0.977 | 0.865 | 1.512 | 0.181 | 0.621 | 0.063 | 0.959 | 0.378 |
| 1382046_at   | AA963495  | mitogen activated protein kinase kinase kinase 3 (predicted)                                                                   | Map3k3_predicted                             | 0.763 | 0.914 | 1.412 | 0.118 | 0.656 | 0.201 | 0.998 | 0.981 |
| 1378791_at   | BF398201  | mitogen activated protein kinase kinase kinase 4 (predicted)                                                                   | Map3k4_predicted                             | 0.898 | 0.554 | 1.084 | 0.585 | 1.034 | 0.670 | 1.359 | 0.084 |
| 1399075_at   | AI146037  | Mitogen activated protein kinase kinase kinase 7 (predicted)                                                                   | Map3k7_predicted                             | 0.979 | 0.678 | 0.773 | 0.168 | 1.032 | 0.677 | 1.050 | 0.960 |
| 1398297_at   | NM_021746 | mitogen-activated protein kinase 12                                                                                            | Mapk12                                       | 0.819 | 0.465 | 1.741 | 0.136 | 0.577 | 0.196 | 1.681 | 0.272 |
| 1368273_at   | NM_031622 | mitogen-activated protein kinase 6                                                                                             | Mapk6                                        | 2.988 | 0.043 | 3.366 | 0.000 | 3.035 | 0.075 | 2.278 | 0.000 |
| 1388593_at   | AI176465  | mitogen-activated protein kinase 8 interacting protein 3                                                                       | Mapk8ip3                                     | 1.611 | 0.025 | 1.795 | 0.013 | 1.624 | 0.157 | 1.235 | 0.054 |
| 1397809_at   | AW920788  | Mitogen-activated protein kinase 8 interacting protein 3                                                                       | Mapk8ip3                                     | 1.411 | 0.173 | 1.674 | 0.016 | 1.016 | 0.965 | 1.128 | 0.220 |
| 1384190_at   | BF553848  | mitogen-activated protein kinase 8 interacting protein 3                                                                       | Mapk8ip3                                     | 0.960 | 0.987 | 1.001 | 0.985 | 1.052 | 0.975 | 1.014 | 0.923 |
| 1371587_at   | AA817829  | mitogen-activated protein kinase kinase 1 interacting protein 1                                                                | Map2k1ip1                                    | 1.289 | 0.015 | 3.343 | 0.002 | 1.168 | 0.090 | 2.718 | 0.002 |
| 1387809_at   | NM_053703 | mitogen-activated protein kinase kinase 6                                                                                      | Map2k6                                       | 1.243 | 0.172 | 1.145 | 0.809 | 1.909 | 0.149 | 1.103 | 0.464 |
| 1398934_at   | BE107454  | mitogen-activated protein kinase kinase kinase 7 interacting protein 2                                                         | Map3k7ip2                                    | 1.158 | 0.481 | 1.341 | 0.760 | 1.000 | 0.697 | 1.257 | 0.925 |
| 1369393_at   | NM_053847 | mitogen-activated protein kinase kinase kinase 8                                                                               | Map3k8                                       | 7.730 | 0.001 | 3.282 | 0.001 | 5.144 | 0.029 | 1.461 | 0.044 |
| 1373719_at   | AA819812  | mitogen-activated protein kinase kinase kinase kinase 3                                                                        | Map4k3                                       | 1.020 | 0.273 | 0.762 | 0.003 | 1.023 | 0.630 | 0.851 | 0.057 |
| 1371042_at   | BG664160  | mitogen-activated protein kinase kinase kinase kinase 3                                                                        | Map4k3                                       | 0.826 | 0.982 | 1.124 | 0.121 | 0.672 | 0.072 | 1.198 | 0.567 |
| 1373863_at   | BF398680  | mitogen-activated protein kinase kinase kinase kinase 4 (predicted)                                                            | Map4k4_predicted                             | 1.022 | 0.601 | 2.120 | 0.073 | 1.108 | 0.527 | 1.547 | 0.195 |

|              |           |                                                                                                         |                     |       |       |        |       |       |       |        |       |
|--------------|-----------|---------------------------------------------------------------------------------------------------------|---------------------|-------|-------|--------|-------|-------|-------|--------|-------|
| 1372804_at   | AI175555  | MMR_HSR1 domain containing protein RGD1359460                                                           | RGD1359460          | 0.761 | 0.352 | 1.124  | 0.403 | 1.055 | 0.561 | 1.160  | 0.088 |
| 1372904_at   | BI285628  | MOB1, Mps One Binder kinase activator-like 2B (yeast) (predicted)                                       | Mobk12b_predicted   | 5.090 | 0.011 | 1.775  | 0.132 | 3.958 | 0.014 | 1.401  | 0.121 |
| 1368071_at   | NM_134410 | MOCO sulphurase C-terminal domain containing 2                                                          | Mosc2               | 0.541 | 0.174 | 0.665  | 0.006 | 0.706 | 0.211 | 0.573  | 0.004 |
| 1372177_at   | AI180033  | molybdenum cofactor synthesis 2                                                                         | Mocs2               | 1.228 | 0.278 | 0.937  | 0.325 | 1.931 | 0.017 | 1.841  | 0.063 |
| 1380666_at   | BI284181  | MON1 homolog b (yeast) (predicted)                                                                      | Mon1b_predicted     | 0.997 | 0.986 | 0.994  | 0.955 | 1.002 | 0.994 | 0.997  | 0.977 |
| 1393189_at   | BF414655  | Monoamine oxidase A                                                                                     | Maoa                | 0.553 | 0.140 | 1.044  | 0.094 | 0.719 | 0.323 | 1.333  | 0.807 |
| 1370678_s_at | D00688    | monoamine oxidase A                                                                                     | Maoa                | 0.611 | 0.165 | 1.046  | 0.341 | 0.586 | 0.640 | 0.983  | 0.912 |
| 1368514_at   | NM_013198 | monoamine oxidase B                                                                                     | Maob                | 0.408 | 0.039 | 1.146  | 0.000 | 0.461 | 0.008 | 0.178  | 0.013 |
| 1371883_at   | BG376037  | monocyte to macrophage differentiation-associated                                                       | Maf                 | 1.003 | 0.393 | 1.111  | 0.924 | 1.633 | 0.259 | 0.854  | 0.223 |
| 1388311_at   | AA799550  | Morf4 family associated protein 1                                                                       | Mrfap1              | 0.835 | 0.777 | 0.824  | 0.021 | 0.803 | 0.300 | 0.794  | 0.001 |
| 1386004_s_at | BF286548  | mortality factor 4 like 1                                                                               | Morf4l1             | 0.951 | 0.250 | 1.012  | 0.062 | 0.965 | 0.928 | 1.135  | 0.060 |
| 1399057_at   | BE109080  | mortality factor 4 like 1                                                                               | Morf4l1             | 0.838 | 0.988 | 1.941  | 0.001 | 0.855 | 0.624 | 1.642  | 0.002 |
| 1371422_at   | BM392210  | mortality factor 4 like 2                                                                               | Morf4l2             | 1.053 | 0.165 | 1.151  | 0.024 | 1.121 | 0.389 | 1.109  | 0.112 |
| 1372210_at   | BM388609  | motile sperm domain containing 3                                                                        | Mospd3              | 0.806 | 0.359 | 1.060  | 0.681 | 0.749 | 0.384 | 1.306  | 0.538 |
| 1382161_at   | AA817668  | M-phase phosphoprotein 10 (U3 small nucleolar ribonucleoprotein) (predicted)                            | Mphosph10_predicted | 0.356 | 0.115 | 2.578  | 0.037 | 1.008 | 0.831 | 2.406  | 0.052 |
| 1375442_at   | BG375380  | M-phase phosphoprotein 10 (U3 small nucleolar ribonucleoprotein) (predicted)                            | Mphosph10_predicted | 0.925 | 0.407 | 2.588  | 0.051 | 1.002 | 0.429 | 1.004  | 0.924 |
| 1382918_at   | AA956561  | MRNA CSG245, partial sequence                                                                           | ---                 | 1.002 | 0.951 | 1.011  | 0.735 | 0.962 | 0.982 | 0.997  | 0.983 |
| 1368525_at   | NM_024001 | MRS2-like, magnesium homeostasis factor ( <i>S. cerevisiae</i> )                                        | Mrs2l               | 0.653 | 0.121 | 0.925  | 0.915 | 0.522 | 0.034 | 1.029  | 0.770 |
| 1387299_at   | NM_053337 | Msx-interacting-zinc finger                                                                             | Miz1                | 0.709 | 0.325 | 0.486  | 0.374 | 0.678 | 0.890 | 0.476  | 0.007 |
| 1373383_at   | AA848807  | MTERF domain containing 1                                                                               | Mterfd1             | 0.781 | 0.247 | 1.444  | 0.026 | 0.814 | 0.023 | 1.332  | 0.105 |
| 1382085_at   | BI293662  | MTERF domain containing 2                                                                               | Mterfd2             | 0.463 | 0.089 | 0.773  | 0.635 | 0.427 | 0.003 | 0.731  | 0.699 |
| 1378034_at   | BF552141  | MTERF domain containing 3                                                                               | Mterfd3             | 1.065 | 0.645 | 0.286  | 0.000 | 0.975 | 0.913 | 0.278  | 0.001 |
| 1367888_at   | NM_053572 | MT-protocadherin                                                                                        | Pcdh21              | 3.731 | 0.058 | 5.873  | 0.010 | 6.766 | 0.002 | 11.742 | 0.004 |
| 1389032_at   | AI408501  | mucolin 1 (predicted)                                                                                   | Mcoln1_predicted    | 1.269 | 0.197 | 1.483  | 0.044 | 0.917 | 0.002 | 1.189  | 0.152 |
| 1369906_s_at | BG378265  | multiple coagulation factor deficiency 2                                                                | Mcfd2               | 0.902 | 0.966 | 1.124  | 1.000 | 0.829 | 0.925 | 0.743  | 0.215 |
| 1398785_at   | NM_019208 | multiple endocrine neoplasia 1                                                                          | Men1                | 0.687 | 0.074 | 1.875  | 0.006 | 1.039 | 0.932 | 1.525  | 0.020 |
| 1375914_at   | BI285504  | multiple endocrine neoplasia 1                                                                          | Men1                | 1.235 | 0.110 | 0.819  | 0.264 | 1.006 | 0.733 | 1.357  | 0.128 |
| 1388126_at   | BG380493  | multiple inositol polyphosphate histidine phosphatase 1                                                 | Minpp1              | 0.848 | 0.404 | 0.795  | 0.129 | 0.800 | 0.375 | 0.814  | 0.005 |
| 1368133_at   | NM_019196 | multiple PDZ domain protein                                                                             | Mpdz                | 0.730 | 0.071 | 0.736  | 0.007 | 0.845 | 0.025 | 0.684  | 0.004 |
| 1387368_at   | NM_012981 | muscle and microspikes RAS                                                                              | Mras                | 1.776 | 0.102 | 2.419  | 0.034 | 1.978 | 0.010 | 1.617  | 0.133 |
| 1375675_at   | AA892813  | Muscleblind-like 2 (predicted)                                                                          | Mbnl2_predicted     | 0.571 | 0.027 | 0.615  | 0.002 | 0.586 | 0.018 | 0.815  | 0.004 |
| 1377208_at   | BI291457  | Muscleblind-like 2 (predicted)                                                                          | Mbnl2_predicted     | 0.766 | 0.165 | 0.946  | 0.611 | 0.782 | 0.479 | 0.873  | 0.302 |
| 1375140_at   | AA818999  | muscleblind-like 2 (predicted)                                                                          | Mbnl2_predicted     | 0.939 | 0.834 | 0.222  | 0.015 | 0.980 | 0.626 | 0.300  | 0.004 |
| 1394931_at   | AI180361  | muscleblind-like 2 (predicted)                                                                          | Mbnl2_predicted     | 0.985 | 0.927 | 0.499  | 0.150 | 0.998 | 0.981 | 0.495  | 0.162 |
| 1373032_at   | AW251450  | musculoskeletal, embryonic nuclear protein 1                                                            | Mustn1              | 0.998 | 0.999 | 1.001  | 0.911 | 1.307 | 0.358 | 1.003  | 0.977 |
| 1368018_at   | NM_031359 | muskelin 1, intracellular mediator containing kelch motifs                                              | Mkln1               | 1.542 | 0.165 | 1.450  | 0.014 | 1.159 | 0.996 | 1.470  | 0.218 |
| 1369965_at   | NM_031053 | mutL homolog 1 ( <i>E. coli</i> ) /// hypothetical gene supported by NM_031053                          | Mlh1 /// LOC497834  | 0.873 | 0.043 | 1.122  | 0.013 | 1.029 | 0.354 | 0.922  | 0.964 |
| 1368002_at   | NM_031058 | mutS homolog 2 ( <i>E. coli</i> )                                                                       | Msh2                | 0.799 | 0.137 | 0.778  | 0.121 | 0.627 | 0.640 | 0.780  | 0.121 |
| 1377846_a_at | AA819391  | mutS homolog 6 ( <i>E. coli</i> ) (predicted)                                                           | Msh6_predicted      | 0.825 | 0.210 | 0.887  | 0.800 | 0.675 | 0.012 | 0.823  | 0.147 |
| 1387779_at   | NM_031668 | MYB binding protein (P160) 1a                                                                           | Mybbp1a             | 0.536 | 0.067 | 2.122  | 0.001 | 0.523 | 0.027 | 1.882  | 0.004 |
| 1394511_at   | BF419160  | myb-like, SWIRM and MPN domains 1 (predicted)                                                           | Mysm1_predicted     | 1.192 | 0.274 | 1.762  | 0.019 | 1.112 | 0.325 | 1.254  | 0.128 |
| 1386075_at   | AI710379  | Myc induced nuclear antigen                                                                             | Mina                | 0.784 | 0.004 | 0.504  | 0.001 | 0.759 | 0.056 | 0.572  | 0.036 |
| 1392743_at   | BI278157  | myc induced nuclear antigen                                                                             | Mina                | 0.631 | 0.032 | 0.786  | 0.009 | 0.668 | 0.000 | 0.846  | 0.336 |
| 1386074_at   | AA850705  | myc induced nuclear antigen                                                                             | Mina                | 0.820 | 0.109 | 0.502  | 0.002 | 0.606 | 0.010 | 0.552  | 0.008 |
| 1368810_a_at | BG666632  | myelin basic protein                                                                                    | Mbp                 | 1.372 | 0.065 | 0.802  | 0.409 | 1.003 | 0.911 | 1.049  | 0.855 |
| 1379526_at   | BG374506  | Myelin basic protein                                                                                    | Mbp                 | 1.690 | 0.334 | 2.139  | 0.062 | 0.852 | 0.893 | 1.496  | 0.057 |
| 1372327_at   | BF552877  | myelin basic protein expression factor 2, repressor                                                     | Myef2               | 0.839 | 0.366 | 0.363  | 0.001 | 0.949 | 0.606 | 0.456  | 0.003 |
| 1373153_at   | AI230720  | Myelin oligodendrocyte glycoprotein                                                                     | Mog                 | 0.516 | 0.021 | 0.429  | 0.012 | 1.182 | 0.683 | 0.849  | 0.288 |
| 1398257_at   | NM_022668 | myelin oligodendrocyte glycoprotein                                                                     | Mog                 | 1.002 | 0.748 | 0.881  | 0.024 | 1.002 | 0.988 | 0.689  | 0.033 |
| 1392332_at   | AI070390  | myelin transcription factor 1 (predicted)                                                               | Myt1_predicted      | 0.982 | 0.085 | 0.621  | 0.021 | 0.774 | 0.097 | 0.647  | 0.046 |
| 1395161_at   | AW531604  | myelin transcription factor 1 (predicted)                                                               | Myt1_predicted      | 0.831 | 0.274 | 0.341  | 0.024 | 0.643 | 0.080 | 0.706  | 0.152 |
| 1370535_at   | U48809    | myelin transcription factor 1-like                                                                      | Myt1l               | 0.998 | 0.148 | 0.984  | 0.800 | 0.998 | 0.021 | 0.991  | 0.865 |
| 1385132_at   | AI044253  | myeloblastosis oncogene-like 1 (predicted)                                                              | Mybl1_predicted     | 0.966 | 0.092 | 1.663  | 0.096 | 1.005 | 0.923 | 1.498  | 0.029 |
| 1368308_at   | NM_012603 | myelocytomatosis viral oncogene homolog (avian)                                                         | Myc                 | 2.272 | 0.083 | 49.603 | 0.001 | 0.468 | 0.057 | 33.833 | 0.001 |
| 1372520_at   | AI172056  | myeloid cell leukemia sequence 1                                                                        | Mcl1                | 2.684 | 0.002 | 3.576  | 0.000 | 2.498 | 0.005 | 2.793  | 0.000 |
| 1370174_at   | BI284349  | myeloid differentiation primary response gene 116                                                       | Myd116              | 6.114 | 0.026 | 21.458 | 0.001 | 6.549 | 0.059 | 9.671  | 0.017 |
| 1374468_at   | AI236590  | myeloid differentiation primary response gene 88                                                        | Myd88               | 1.251 | 0.504 | 0.719  | 0.159 | 1.476 | 0.051 | 1.041  | 0.627 |
| 1371359_at   | BG381670  | myeloid leukemia factor 2 (predicted)                                                                   | Mlf2_predicted      | 1.005 | 0.997 | 0.957  | 0.558 | 0.776 | 0.958 | 0.965  | 0.464 |
| 1381069_at   | BF413433  | myeloid/lymphoid or mixed-lineage leukemia (mapped)                                                     | Mll_mapped          | 2.004 | 0.014 | 1.915  | 0.037 | 2.465 | 0.013 | 2.061  | 0.035 |
| 1393752_at   | BE101697  | myeloid/lymphoid or mixed-lineage leukemia (mapped)                                                     | Mll_mapped          | 1.057 | 0.463 | 1.006  | 0.943 | 1.004 | 0.439 | 0.989  | 0.823 |
| 1373038_at   | AI145989  | myeloid/lymphoid or mixed-lineage leukemia (trithorax homolog, <i>Drosophila</i> ); translocated to, 10 | Mllt10              | 1.488 | 0.104 | 1.432  | 0.005 | 1.364 | 0.378 | 1.439  | 0.020 |

|              |           |                                                                                                 |                 |        |       |       |       |        |       |        |       |
|--------------|-----------|-------------------------------------------------------------------------------------------------|-----------------|--------|-------|-------|-------|--------|-------|--------|-------|
| 1383512_at   | AW918674  | myeloid/lymphoid or mixed-lineage leukemia (trithorax homolog, Drosophila); translocated to, 10 | Mllt10          | 1.021  | 0.889 | 2.496 | 0.008 | 1.022  | 0.832 | 2.119  | 0.014 |
| 1371692_at   | AI009661  | myeloid/lymphoid or mixed-lineage leukemia (trithorax homolog, Drosophila); translocated to, 11 | Mllt11          | 0.320  | 0.002 | 0.532 | 0.004 | 0.288  | 0.006 | 0.559  | 0.005 |
| 1372274_at   | AI009727  | Myeloid/lymphoid or mixed-lineage leukemia 5 (trithorax homolog, Drosophila)                    | Mll5            | 1.185  | 0.108 | 0.922 | 0.806 | 1.317  | 0.268 | 0.877  | 0.198 |
| 1375573_at   | BE120038  | Myeloid/lymphoid or mixed-lineage leukemia 5 (trithorax homolog, Drosophila)                    | Mll5            | 1.175  | 0.250 | 1.697 | 0.119 | 0.983  | 0.990 | 1.635  | 0.122 |
| 1392564_at   | BI299176  | myeloid/lymphoid or mixed-lineage leukemia 5 (trithorax homolog, Drosophila)                    | Mll5            | 1.181  | 0.579 | 1.054 | 0.370 | 1.265  | 0.568 | 1.574  | 0.083 |
| 1377321_at   | BF415831  | Myeloid/lymphoid or mixed-lineage leukemia 5 (trithorax homolog, Drosophila)                    | Mll5            | 1.310  | 0.733 | 1.000 | 0.954 | 1.301  | 0.433 | 0.953  | 0.265 |
| 1384125_at   | BF547275  | myeloid/lymphoid or mixed-lineage leukemia 5 (trithorax homolog, Drosophila)                    | Mll5            | 1.028  | 0.872 | 1.091 | 0.347 | 1.020  | 0.929 | 1.142  | 0.600 |
| 1375703_at   | BE117891  | myeloid/lymphoid or mixed-lineage leukemia 5 (trithorax homolog, Drosophila)                    | Mll5            | 0.835  | 0.948 | 1.146 | 0.276 | 0.814  | 0.392 | 0.546  | 0.008 |
| 1385422_at   | BF396651  | myeloid/lymphoid or mixed-lineage leukemia 5 (trithorax homolog, Drosophila)                    | Mll5            | 0.988  | 0.972 | 1.062 | 0.351 | 0.802  | 0.510 | 0.819  | 0.189 |
| 1368279_at   | NM_053718 | myeloid/lymphoid or mixed-lineage leukemia,translocated to, 3 (trithorax homolog, Drosophila)   | Mllt3           | 1.165  | 0.102 | 2.205 | 0.068 | 2.707  | 0.013 | 2.241  | 0.018 |
| 1385953_at   | AI454608  | Myeloid/lymphoid or mixed-lineage leukemia,translocated to, 3 (trithorax homolog, Drosophila)   | Mllt3           | 1.397  | 0.139 | 1.282 | 0.077 | 1.912  | 0.011 | 1.200  | 0.063 |
| 1384478_at   | BF549837  | Myeloid/lymphoid or mixed-lineage leukemia,translocated to, 3 (trithorax homolog, Drosophila)   | Mllt3           | 0.938  | 0.708 | 1.450 | 0.038 | 1.969  | 0.064 | 1.039  | 0.148 |
| 1388453_at   | BI296048  | myeloid-associated differentiation marker                                                       | Myadm           | 0.852  | 0.029 | 0.416 | 0.024 | 0.826  | 0.460 | 0.542  | 0.022 |
| 1388434_at   | AA818018  | MYG1 protein                                                                                    | C12orf10        | 0.487  | 0.090 | 1.051 | 0.911 | 0.362  | 0.038 | 1.157  | 0.993 |
| 1392676_at   | AI548984  | myocardial ischemic preconditioning upregulated 1                                               | Mip1            | 1.187  | 0.683 | 0.440 | 0.005 | 1.086  | 0.759 | 0.401  | 0.005 |
| 1378482_at   | AI411065  | MyoD family inhibitor domain containing (predicted)                                             | Mdfic_predicted | 1.407  | 0.164 | 0.957 | 0.811 | 1.161  | 0.982 | 0.953  | 0.856 |
| 1387181_at   | NM_013172 | myogenic factor 6                                                                               | Myf6            | 0.598  | 0.324 | 0.625 | 0.075 | 0.811  | 0.568 | 1.675  | 0.567 |
| 1368310_at   | NM_017115 | myogenin                                                                                        | Myog            | 0.997  | 0.993 | 0.997 | 0.348 | 1.007  | 0.980 | 1.004  | 0.761 |
| 1394804_at   | AI599871  | Myopalladin (predicted)                                                                         | Mypn_predicted  | 1.132  | 0.804 | 0.554 | 0.767 | 1.059  | 0.708 | 0.903  | 0.911 |
| 1368355_at   | NM_017083 | myosin 5B                                                                                       | Myo5b           | 1.182  | 0.567 | 0.868 | 0.472 | 1.134  | 0.597 | 0.602  | 0.047 |
| 1370478_at   | AY004215  | myosin heavy chain Myr 8                                                                        | Myr8            | 0.124  | 0.002 | 0.204 | 0.011 | 0.169  | 0.000 | 0.236  | 0.048 |
| 1397590_at   | AA859008  | myosin Ib                                                                                       | Myo1b           | 3.691  | 0.020 | 2.538 | 0.118 | 2.488  | 0.066 | 1.968  | 0.555 |
| 1369720_at   | NM_053986 | myosin Ib                                                                                       | Myo1b           | 3.070  | 0.045 | 7.124 | 0.000 | 1.918  | 0.112 | 3.192  | 0.002 |
| 1395485_s_at | AA859008  | myosin Ib                                                                                       | Myo1b           | 2.564  | 0.068 | 1.008 | 0.423 | 1.960  | 0.106 | 1.062  | 0.141 |
| 1388917_at   | BI279786  | myosin ID                                                                                       | Myo1d           | 0.495  | 0.175 | 0.247 | 0.000 | 0.582  | 0.072 | 0.353  | 0.024 |
| 1370933_at   | BI275813  | myosin IE                                                                                       | Myo1e           | 2.032  | 0.117 | 0.931 | 0.651 | 3.728  | 0.006 | 1.051  | 0.468 |
| 1376098_a_at | BF282304  | myosin IG                                                                                       | Myo1g           | 0.959  | 0.070 | 6.836 | 0.002 | 1.154  | 0.596 | 5.672  | 0.003 |
| 1387866_at   | AI178160  | myosin IXb                                                                                      | Myo9b           | 6.124  | 0.002 | 5.392 | 0.005 | 5.975  | 0.003 | 2.505  | 0.001 |
| 1388114_at   | X05566    | myosin light chain, regulatory B                                                                | Mrlcb           | 1.664  | 0.018 | 3.283 | 0.001 | 1.656  | 0.046 | 2.279  | 0.000 |
| 1386996_at   | D14688    | myosin light chain, regulatory B                                                                | Mrlcb           | 0.822  | 0.208 | 0.950 | 0.031 | 1.006  | 0.993 | 1.010  | 0.057 |
| 1390067_at   | BF403821  | Myosin phosphatase-Rho interacting protein                                                      | Mrip            | 1.123  | 0.107 | 0.999 | 0.705 | 1.101  | 0.613 | 0.998  | 0.979 |
| 1369980_s_at | NM_053814 | myosin phosphatase-Rho interacting protein                                                      | Mrip            | 1.221  | 0.135 | 1.137 | 0.030 | 1.405  | 0.020 | 1.597  | 0.015 |
| 1368450_at   | NM_022178 | myosin Va                                                                                       | Myo5a           | 0.881  | 0.255 | 2.634 | 0.022 | 0.617  | 0.081 | 1.363  | 0.023 |
| 1376848_at   | AI137988  | Myosin X (predicted)                                                                            | Myo10_predicted | 2.674  | 0.013 | 1.377 | 0.074 | 1.861  | 0.039 | 1.351  | 0.001 |
| 1393639_at   | AI044576  | myosin X (predicted)                                                                            | Myo10_predicted | 1.019  | 0.418 | 1.088 | 0.119 | 0.999  | 0.443 | 1.305  | 0.100 |
| 1370158_at   | AA946388  | myosin, heavy polypeptide 10, non-muscle                                                        | Myh10           | 0.408  | 0.000 | 0.232 | 0.001 | 0.451  | 0.001 | 0.299  | 0.003 |
| 1380613_at   | BM390334  | Myosin, heavy polypeptide 11, smooth muscle                                                     | Myh11           | 1.389  | 0.578 | 0.858 | 0.140 | 1.563  | 0.199 | 1.254  | 0.354 |
| 1384264_at   | AI578120  | myosin, heavy polypeptide 14                                                                    | Myh14           | 1.023  | 0.912 | 0.994 | 0.519 | 1.245  | 0.360 | 1.011  | 0.981 |
| 1396165_at   | AI601887  | Myosin, heavy polypeptide 7, cardiac muscle, beta                                               | Myh7            | 1.527  | 0.515 | 1.319 | 0.799 | 1.017  | 0.831 | 1.331  | 0.628 |
| 1393540_at   | AA924346  | Myosin, heavy polypeptide 7, cardiac muscle, beta                                               | Myh7            | 1.001  | 0.998 | 1.002 | 0.432 | 1.240  | 0.195 | 0.999  | 0.987 |
| 1371725_at   | BM392410  | Myosin, heavy polypeptide 9, non-muscle                                                         | Myh9            | 2.572  | 0.012 | 1.909 | 0.004 | 1.491  | 0.152 | 1.772  | 0.004 |
| 1387402_at   | NM_013194 | myosin, heavy polypeptide 9, non-muscle                                                         | Myh9            | 1.782  | 0.170 | 1.676 | 0.300 | 2.178  | 0.229 | 1.057  | 0.903 |
| 1371541_at   | AI177055  | Myosin, light polypeptide kinase (predicted)                                                    | Mylk_predicted  | 0.663  | 0.150 | 0.467 | 0.011 | 1.123  | 0.281 | 0.699  | 0.263 |
| 1371841_at   | AI228667  | myotrophin                                                                                      | Mtpn            | 0.786  | 0.015 | 1.016 | 0.666 | 0.693  | 0.029 | 1.082  | 0.686 |
| 1387785_at   | U21661    | myotrophin                                                                                      | Mtpn            | 0.636  | 0.046 | 2.310 | 0.007 | 0.510  | 0.021 | 1.505  | 0.035 |
| 1383071_at   | BG667380  | myotrophin                                                                                      | Mtpn            | 0.635  | 0.347 | 0.715 | 0.025 | 0.495  | 0.093 | 0.768  | 0.012 |
| 1387786_at   | AI711244  | myotrophin                                                                                      | Mtpn            | 0.538  | 0.712 | 0.990 | 0.285 | 0.527  | 0.080 | 1.099  | 0.691 |
| 1377422_at   | AI029466  | myotubularin related protein 1 (predicted)                                                      | Mtmr1_predicted | 0.681  | 0.106 | 1.840 | 0.052 | 0.629  | 0.020 | 2.684  | 0.015 |
| 1391512_at   | AI029734  | Myotubularin related protein 1 (predicted)                                                      | Mtmr1_predicted | 0.977  | 0.869 | 1.136 | 0.202 | 1.058  | 0.426 | 0.916  | 0.931 |
| 1373589_at   | BM385209  | myotubularin related protein 3                                                                  | Mtmr3           | 1.085  | 0.064 | 1.399 | 0.030 | 1.152  | 0.188 | 1.098  | 0.436 |
| 1372287_at   | AI236780  | Myotubularin related protein 6 (predicted)                                                      | Mtmr6_predicted | 0.671  | 0.042 | 0.848 | 0.027 | 0.675  | 0.030 | 0.917  | 0.196 |
| 1391225_at   | BF392551  | Myotubularin related protein 7 (predicted)                                                      | Mtmr7_predicted | 0.740  | 0.022 | 0.395 | 0.001 | 0.791  | 0.090 | 0.432  | 0.024 |
| 1374883_at   | BF392344  | myotubularin related protein 7 (predicted)                                                      | Mtmr7_predicted | 0.971  | 0.832 | 0.699 | 0.089 | 0.589  | 0.022 | 0.611  | 0.018 |
| 1389116_at   | BE111884  | myotubularin related protein 9                                                                  | Mtmr9           | 0.789  | 0.599 | 0.830 | 0.819 | 0.772  | 0.932 | 0.871  | 0.487 |
| 1373432_at   | BE111604  | myristoylated alanine rich protein kinase C substrate                                           | Marcks          | 0.670  | 0.046 | 0.454 | 0.003 | 0.685  | 0.017 | 0.450  | 0.075 |
| 1370949_at   | M59859    | myristoylated alanine rich protein kinase C substrate                                           | Marcks          | 1.091  | 0.479 | 0.659 | 0.003 | 0.728  | 0.053 | 0.443  | 0.020 |
| 1370948_a_at | M59859    | myristoylated alanine rich protein kinase C substrate                                           | Marcks          | 1.013  | 0.980 | 0.937 | 0.510 | 0.594  | 0.091 | 0.628  | 0.188 |
| 1399016_at   | BG671507  | MYST histone acetyltransferase 2                                                                | Myst2           | 1.078  | 0.888 | 1.459 | 0.114 | 0.972  | 0.392 | 1.146  | 0.451 |
| 1371015_at   | X52711    | myxovirus (influenza virus) resistance 1                                                        | Mx1             | 7.248  | 0.003 | 3.361 | 0.001 | 71.772 | 0.000 | 31.540 | 0.000 |
| 1369202_at   | NM_017028 | myxovirus (influenza virus) resistance 2                                                        | Mx2             | 21.174 | 0.005 | 3.319 | 0.041 | 47.527 | 0.003 | 12.513 | 0.001 |
| 1387283_at   | NM_134350 | myxovirus (influenza virus) resistance 2                                                        | Mx2             | 2.682  | 0.006 | 3.121 | 0.007 | 17.385 | 0.001 | 12.222 | 0.001 |

|              |           |                                                                                                                 |                       |       |       |       |       |       |       |       |       |
|--------------|-----------|-----------------------------------------------------------------------------------------------------------------|-----------------------|-------|-------|-------|-------|-------|-------|-------|-------|
| 1373939_at   | AI236719  | N-acetylglucosamine kinase                                                                                      | Nagk                  | 0.999 | 0.709 | 0.854 | 0.444 | 0.407 | 0.009 | 0.654 | 0.287 |
| 1374790_at   | AW433892  | N-acetylglucosamine-1-phosphotransferase, gamma subunit                                                         | Gnptg                 | 0.644 | 0.125 | 0.669 | 0.009 | 0.765 | 0.085 | 0.677 | 0.024 |
| 1372401_at   | AA859401  | N-acetylneuraminic acid synthase (sialic acid synthase) (predicted)                                             | Nans_predicted        | 0.980 | 0.123 | 1.677 | 0.017 | 1.478 | 0.150 | 1.932 | 0.025 |
| 1372402_at   | AW435213  | N-acetylneuraminic acid synthase (sialic acid synthase) (predicted)                                             | Nans_predicted        | 1.167 | 0.433 | 1.299 | 0.043 | 1.334 | 0.157 | 1.526 | 0.111 |
| 1397963_x_at | BE106401  | N-acetylneuraminic acid synthase (sialic acid synthase) (predicted)                                             | Nans_predicted        | 0.864 | 0.853 | 0.978 | 0.798 | 1.020 | 0.673 | 1.071 | 0.477 |
| 1368434_at   | NM_053853 | N-acetyltransferase 1 (arylamine N-acetyltransferase)                                                           | Nat1                  | 1.092 | 0.737 | 0.838 | 0.005 | 1.351 | 0.314 | 1.045 | 0.999 |
| 1387187_a_at | U17260    | N-acetyltransferase 1 (arylamine N-acetyltransferase)                                                           | Nat1                  | 1.012 | 0.921 | 0.992 | 0.965 | 1.003 | 0.490 | 0.995 | 0.976 |
| 1388352_at   | BI296716  | N-acetyltransferase 5 (ARD1 homolog, <i>S. cerevisiae</i> ) (predicted)                                         | Nat5_predicted        | 1.630 | 0.093 | 0.854 | 0.113 | 2.113 | 0.038 | 0.948 | 0.495 |
| 1392627_x_at | BI282114  | N-acetyltransferase 8 (camello like)                                                                            | Nat8                  | 1.042 | 0.924 | 0.992 | 0.229 | 1.168 | 0.190 | 0.945 | 0.161 |
| 1375230_at   | AA800192  | N-acetyltransferase 8 (camello like)                                                                            | Nat8                  | 1.045 | 0.950 | 1.171 | 0.270 | 1.176 | 0.180 | 1.332 | 0.264 |
| 1376192_at   | AI070138  | N-acetyltransferase 9 (predicted)                                                                               | Nat9_predicted        | 0.824 | 0.198 | 0.955 | 0.572 | 0.568 | 0.037 | 1.078 | 0.420 |
| 1383922_a_at | BG375634  | N-acetyltransferase ARD1 homolog ( <i>S. cerevisiae</i> ) (predicted)                                           | Ard1_predicted        | 0.685 | 0.497 | 0.910 | 0.414 | 0.889 | 0.298 | 0.920 | 0.310 |
| 1384340_a_at | AA997134  | N-acetyltransferase ARD1 homolog ( <i>S. cerevisiae</i> ) (predicted)                                           | Ard1_predicted        | 0.592 | 0.927 | 0.721 | 0.045 | 1.028 | 0.817 | 0.782 | 0.196 |
| 1369077_at   | NM_053407 | N-acylsphingosine amidohydrolase 1                                                                              | Asah1                 | 1.578 | 0.867 | 0.406 | 0.008 | 0.823 | 0.803 | 0.368 | 0.016 |
| 1374770_at   | AA800062  | N-acylsphingosine amidohydrolase 1                                                                              | Asah1                 | 1.008 | 0.929 | 0.775 | 0.028 | 1.067 | 0.491 | 0.842 | 0.287 |
| 1391791_at   | AI137826  | N-acylsphingosine amidohydrolase 3-like (predicted)                                                             | Asah31_predicted      | 1.095 | 0.708 | 1.000 | 0.877 | 1.002 | 0.250 | 0.999 | 0.952 |
| 1379472_at   | AI232666  | NAD synthetase 1                                                                                                | Nadsyn1               | 0.807 | 0.178 | 0.859 | 0.415 | 0.961 | 0.825 | 0.864 | 0.984 |
| 1392988_at   | BF407232  | NAD(P) dependent steroid dehydrogenase-like                                                                     | Nsdhl                 | 0.709 | 0.114 | 0.916 | 0.140 | 0.809 | 0.206 | 0.817 | 0.655 |
| 1387599_a_at | J02679    | NAD(P)H dehydrogenase, quinone 1                                                                                | Nqo1                  | 0.556 | 0.038 | 3.715 | 0.005 | 0.453 | 0.010 | 3.812 | 0.012 |
| 1374959_at   | AA945624  | NAD(P)H dehydrogenase, quinone 2                                                                                | Nqo2                  | 6.196 | 0.008 | 1.670 | 0.318 | 9.031 | 0.001 | 1.625 | 0.422 |
| 1389334_at   | BI277594  | NADH dehydrogenase (ubiquinone) 1 alpha subcomplex 10 /// NADH dehydrogenase 1 alpha subcomplex 10-like protein | Ndufa10 /// LOC316632 | 0.619 | 0.093 | 0.861 | 0.109 | 0.492 | 0.001 | 0.855 | 0.125 |
| 1375220_at   | AA818971  | NADH dehydrogenase (ubiquinone) 1 alpha subcomplex 11                                                           | Ndufa11               | 0.713 | 0.565 | 0.700 | 0.084 | 0.546 | 0.014 | 0.934 | 0.226 |
| 1386951_at   | NM_012985 | NADH dehydrogenase (ubiquinone) 1 alpha subcomplex 5                                                            | Ndufa5                | 0.870 | 0.046 | 1.266 | 0.020 | 0.782 | 0.069 | 1.086 | 0.311 |
| 1388391_at   | AA996544  | NADH dehydrogenase (ubiquinone) 1 alpha subcomplex, 1 (predicted)                                               | Ndufa1_predicted      | 0.991 | 0.968 | 0.754 | 0.010 | 0.825 | 0.197 | 0.774 | 0.192 |
| 1391126_at   | BG379351  | NADH dehydrogenase (ubiquinone) 1 alpha subcomplex, 12 (predicted)                                              | Ndufa12_predicted     | 0.279 | 0.009 | 0.220 | 0.001 | 0.397 | 0.009 | 0.222 | 0.000 |
| 1371605_at   | AI710281  | NADH dehydrogenase (ubiquinone) 1 alpha subcomplex, 12 (predicted)                                              | Ndufa12_predicted     | 0.687 | 0.237 | 0.823 | 0.080 | 0.612 | 0.048 | 0.717 | 0.329 |
| 1388362_at   | BM390197  | NADH dehydrogenase (ubiquinone) 1 alpha subcomplex, 13 (predicted)                                              | Ndufa13_predicted     | 0.941 | 0.948 | 1.131 | 0.067 | 0.972 | 0.328 | 1.575 | 0.003 |
| 1389288_at   | BI279838  | NADH dehydrogenase (ubiquinone) 1 alpha subcomplex, 2 (predicted)                                               | Ndufa2_predicted      | 0.523 | 0.335 | 0.489 | 0.018 | 0.370 | 0.015 | 0.622 | 0.007 |
| 1379243_at   | AA819547  | NADH dehydrogenase (ubiquinone) 1 alpha subcomplex, 6 (B14) (predicted)                                         | Ndufa6_predicted      | 0.637 | 0.030 | 0.798 | 0.371 | 0.640 | 0.055 | 0.618 | 0.401 |
| 1395045_at   | BM384525  | NADH dehydrogenase (ubiquinone) 1 alpha subcomplex, 7 (B14.5a) (predicted)                                      | Ndufa7_predicted      | 0.636 | 0.119 | 0.843 | 0.155 | 0.599 | 0.052 | 0.875 | 0.495 |
| 1375411_at   | BI277002  | NADH dehydrogenase (ubiquinone) 1 alpha subcomplex, 7 (B14.5a) (predicted)                                      | Ndufa7_predicted      | 0.831 | 0.375 | 0.902 | 0.146 | 0.717 | 0.211 | 0.910 | 0.740 |
| 1371355_at   | BI280270  | NADH dehydrogenase (ubiquinone) 1 alpha subcomplex, 8                                                           | Ndufa8                | 0.742 | 0.611 | 1.291 | 0.084 | 0.820 | 0.146 | 1.610 | 0.126 |
| 1388323_at   | BG381033  | NADH dehydrogenase (ubiquinone) 1 alpha subcomplex, 9                                                           | Ndufa9                | 0.656 | 0.100 | 0.822 | 0.035 | 0.623 | 0.009 | 0.838 | 0.230 |
| 1393689_at   | BE097322  | NADH dehydrogenase (ubiquinone) 1 alpha subcomplex, assembly factor 1 (predicted)                               | Ndufaf1_predicted     | 0.733 | 0.165 | 1.025 | 0.918 | 0.676 | 0.084 | 1.986 | 0.046 |
| 1373041_at   | AI555535  | NADH dehydrogenase (ubiquinone) 1 beta subcomplex 3 (predicted)                                                 | Ndufb3_predicted      | 0.600 | 0.120 | 0.723 | 0.005 | 0.519 | 0.025 | 0.615 | 0.042 |
| 1388315_at   | BI282661  | NADH dehydrogenase (ubiquinone) 1 beta subcomplex, 11 (predicted)                                               | Ndufb11_predicted     | 0.791 | 0.892 | 0.709 | 0.053 | 0.565 | 0.163 | 0.754 | 0.060 |
| 1389012_at   | BM386606  | NADH dehydrogenase (ubiquinone) 1 beta subcomplex, 2 (predicted)                                                | Ndufb2_predicted      | 0.948 | 0.802 | 0.799 | 0.165 | 0.742 | 0.156 | 0.990 | 0.923 |
| 1371371_at   | AW434041  | NADH dehydrogenase (ubiquinone) 1 beta subcomplex, 4, 15kDa                                                     | Ndufb4                | 0.768 | 0.026 | 0.773 | 0.076 | 0.687 | 0.020 | 0.810 | 0.034 |
| 1388304_at   | BI281307  | NADH dehydrogenase (ubiquinone) 1 beta subcomplex, 5 (predicted)                                                | Ndufb5_predicted      | 0.595 | 0.270 | 0.563 | 0.000 | 0.529 | 0.010 | 0.477 | 0.033 |
| 1371346_at   | AI104528  | NADH dehydrogenase (ubiquinone) 1 beta subcomplex, 6 (predicted)                                                | Ndufb6_predicted      | 0.725 | 0.585 | 0.592 | 0.029 | 0.530 | 0.041 | 0.666 | 0.002 |
| 1388343_at   | AI575943  | NADH dehydrogenase (ubiquinone) 1 beta subcomplex, 7 (predicted)                                                | Ndufb7_predicted      | 0.539 | 0.228 | 1.079 | 0.524 | 0.681 | 0.051 | 0.986 | 0.399 |
| 1371701_at   | BG666921  | NADH dehydrogenase (ubiquinone) 1 beta subcomplex, 9 (predicted)                                                | Ndufb9_predicted      | 0.618 | 0.124 | 1.164 | 0.246 | 0.560 | 0.003 | 1.097 | 0.158 |
| 1389964_at   | AA944343  | NADH dehydrogenase (ubiquinone) 1, alpha/beta subcomplex, 1 (predicted)                                         | Ndufab1_predicted     | 0.558 | 0.476 | 0.921 | 0.221 | 0.452 | 0.027 | 0.889 | 0.388 |
| 1375516_at   | AA891171  | NADH dehydrogenase (ubiquinone) 1, subcomplex unknown, 2                                                        | Ndufc2                | 0.679 | 0.264 | 0.787 | 0.056 | 0.647 | 0.120 | 0.761 | 0.001 |
| 1381520_at   | BE105072  | NADH dehydrogenase (ubiquinone) Fe-S protein 1                                                                  | Ndufs1                | 1.212 | 0.180 | 0.844 | 0.165 | 0.599 | 0.140 | 1.223 | 0.149 |
| 1371577_at   | AI171362  | NADH dehydrogenase (ubiquinone) Fe-S protein 1                                                                  | Ndufs1                | 0.616 | 0.263 | 0.585 | 0.000 | 0.472 | 0.059 | 0.704 | 0.001 |
| 1371482_at   | AA851675  | NADH dehydrogenase (ubiquinone) Fe-S protein 2                                                                  | Ndufs2                | 0.598 | 0.339 | 0.603 | 0.001 | 0.592 | 0.157 | 0.672 | 0.020 |
| 1388364_at   | BG381650  | NADH dehydrogenase (ubiquinone) Fe-S protein 3 (predicted)                                                      | Ndufs3_predicted      | 0.543 | 0.325 | 0.984 | 0.752 | 0.498 | 0.188 | 1.082 | 0.378 |
| 1372147_at   | BM387802  | NADH dehydrogenase (ubiquinone) Fe-S protein 4, 18kDa (NADH-coenzyme Q reductase)                               | Ndufs4                | 0.884 | 0.503 | 1.175 | 0.287 | 0.898 | 0.162 | 1.224 | 0.114 |
| 1388414_at   | AI410498  | NADH dehydrogenase (ubiquinone) Fe-S protein 5b, 15kDa (NADH-coenzyme Q reductase)                              | Ndufs5b               | 0.749 | 0.739 | 0.593 | 0.027 | 0.787 | 0.084 | 0.715 | 0.220 |
| 1370006_at   | NM_019223 | NADH dehydrogenase (ubiquinone) Fe-S protein 6                                                                  | Ndufs6                | 0.942 | 0.563 | 1.048 | 0.612 | 0.866 | 0.429 | 0.989 | 0.944 |
| 1371912_at   | AI231358  | NADH dehydrogenase (ubiquinone) Fe-S protein 7                                                                  | Ndufs7                | 0.539 | 0.177 | 0.982 | 0.918 | 0.601 | 0.129 | 1.000 | 0.998 |
| 1388326_at   | AA799479  | NADH dehydrogenase (ubiquinone) Fe-S protein 8 (predicted)                                                      | Ndufs8_predicted      | 0.738 | 0.616 | 1.158 | 0.331 | 0.578 | 0.053 | 1.149 | 0.560 |
| 1371416_at   | AI231746  | NADH dehydrogenase (ubiquinone) flavoprotein 1                                                                  | Ndufv1                | 0.542 | 0.196 | 0.880 | 0.044 | 0.710 | 0.006 | 0.708 | 0.105 |
| 1371041_at   | M22756    | NADH dehydrogenase (ubiquinone) flavoprotein 2                                                                  | Ndufv2                | 0.625 | 0.139 | 0.959 | 0.151 | 0.633 | 0.006 | 0.925 | 0.102 |
| 1368566_a_at | AA964381  | NADH dehydrogenase (ubiquinone) flavoprotein 3-like                                                             | Ndufv3l               | 1.086 | 0.608 | 0.774 | 0.111 | 0.948 | 0.062 | 0.695 | 0.108 |
| 1368567_at   | NM_022607 | NADH dehydrogenase (ubiquinone) flavoprotein 3-like                                                             | Ndufv3l               | 0.588 | 0.815 | 1.291 | 0.167 | 0.430 | 0.567 | 1.086 | 0.665 |
| 1387311_at   | NM_053683 | NADPH oxidase 1                                                                                                 | Nox1                  | 0.998 | 0.405 | 0.688 | 0.045 | 1.003 | 0.628 | 0.995 | 0.977 |
| 1387110_at   | NM_012993 | nardilysin, N-arginine dibasic convertase 1                                                                     | Nrd1                  | 0.907 | 0.756 | 0.846 | 0.070 | 1.092 | 0.767 | 0.937 | 0.010 |
| 1382673_at   | BE115812  | Nardilysin, N-arginine dibasic convertase 1                                                                     | Nrd1                  | 0.931 | 0.983 | 1.250 | 0.270 | 0.914 | 0.074 | 1.116 | 0.046 |

|              |           |                                                                                    |                   |       |       |       |       |       |       |       |       |
|--------------|-----------|------------------------------------------------------------------------------------|-------------------|-------|-------|-------|-------|-------|-------|-------|-------|
| 1368153_at   | AJ293698  | nasal embryonic LHRH factor                                                        | Nelf              | 1.177 | 0.460 | 0.565 | 0.042 | 0.827 | 0.447 | 0.811 | 0.089 |
| 1371435_at   | BI279561  | nascent-polypeptide-associated complex alpha polypeptide (predicted)               | Naca_predicted    | 0.904 | 0.737 | 1.182 | 0.844 | 0.654 | 0.197 | 1.036 | 0.918 |
| 1391425_at   | AW528585  | NCK interacting protein with SH3 domain (predicted)                                | Nckipsd_predicted | 0.992 | 0.842 | 1.187 | 0.766 | 0.832 | 0.917 | 1.206 | 0.819 |
| 1371407_at   | AI178285  | NCK-associated protein 1                                                           | Nckap1            | 0.868 | 0.315 | 0.816 | 0.007 | 0.871 | 0.062 | 0.885 | 0.011 |
| 1388196_at   | BM383722  | NCK-associated protein 1                                                           | Nckap1            | 1.038 | 0.796 | 0.864 | 0.024 | 1.194 | 0.684 | 0.833 | 0.042 |
| 1398319_at   | AI071000  | Nclone10 mRNA                                                                      | ---               | 2.035 | 0.003 | 2.006 | 0.008 | 1.293 | 0.088 | 1.995 | 0.006 |
| 1374827_at   | BI276137  | N-deacetylase/N-sulfotransferase (heparan glucosaminyl) 2 (predicted)              | Ndst2_predicted   | 0.916 | 0.553 | 1.215 | 0.002 | 1.054 | 0.993 | 0.999 | 0.987 |
| 1389532_at   | AW252250  | Nebulette (predicted)                                                              | Neb1_predicted    | 2.480 | 0.021 | 1.472 | 0.074 | 0.919 | 0.549 | 1.014 | 0.647 |
| 1394666_at   | AI549596  | Nebulin (predicted)                                                                | Neb_predicted     | 1.320 | 0.786 | 1.614 | 0.883 | 1.155 | 0.354 | 1.235 | 0.510 |
| 1372082_at   | BM391772  | NECAP endocytosis associated 2                                                     | Necap2            | 0.569 | 0.042 | 0.848 | 0.222 | 1.116 | 0.531 | 0.770 | 0.051 |
| 1371947_at   | BG671865  | necdin                                                                             | Ndn               | 0.794 | 0.901 | 0.336 | 0.011 | 0.873 | 0.203 | 0.625 | 0.021 |
| 1394181_at   | AI176506  | Necdin-like 2                                                                      | Ndn12             | 0.643 | 0.006 | 0.974 | 0.903 | 0.783 | 0.007 | 1.041 | 0.140 |
| 1376704_a_at | BM390112  | necdin-like 2                                                                      | Ndn12             | 0.616 | 0.116 | 0.963 | 0.462 | 0.768 | 0.205 | 1.035 | 0.702 |
| 1398893_at   | BG671512  | Nedd4 family interacting protein 1                                                 | Ndfip1            | 0.728 | 0.249 | 0.632 | 0.000 | 0.650 | 0.068 | 0.621 | 0.000 |
| 1395345_at   | BF282156  | Nedd4 family interacting protein 1                                                 | Ndfip1            | 1.416 | 0.310 | 0.806 | 0.896 | 0.883 | 0.081 | 0.912 | 0.371 |
| 1389364_at   | BF406709  | Nedd4 family interacting protein 2 (predicted)                                     | Ndfip2_predicted  | 1.528 | 0.169 | 4.782 | 0.000 | 1.049 | 0.675 | 3.074 | 0.001 |
| 1373861_at   | AI228114  | Nedd4 family interacting protein 2 (predicted)                                     | Ndfip2_predicted  | 1.218 | 0.196 | 2.164 | 0.001 | 1.249 | 0.007 | 1.910 | 0.001 |
| 1373775_at   | AI232313  | NEDD8 ultimate buster-1                                                            | Nub1              | 3.986 | 0.001 | 2.518 | 0.007 | 4.866 | 0.000 | 3.598 | 0.001 |
| 1393654_at   | BM391891  | nei endonuclease VIII-like 1 (E. coli)                                             | Neil1             | 0.558 | 0.070 | 0.598 | 0.014 | 0.832 | 0.073 | 0.621 | 0.032 |
| 1372497_at   | AI104094  | neighbor of Brca1 gene 1                                                           | Nbr1              | 1.042 | 0.890 | 0.925 | 0.850 | 0.875 | 0.147 | 0.848 | 0.069 |
| 1381509_at   | BF393724  | neighbor of Brca1 gene 1                                                           | Nbr1              | 1.001 | 0.988 | 9.171 | 0.010 | 0.932 | 0.076 | 3.960 | 0.014 |
| 1368120_at   | NM_031069 | NEL-like 1 (chicken)                                                               | Nell1             | 0.997 | 0.060 | 0.864 | 0.195 | 0.753 | 0.955 | 1.412 | 0.197 |
| 1392770_at   | BF415817  | neogenin                                                                           | Neo1              | 0.530 | 0.006 | 0.615 | 0.018 | 0.497 | 0.003 | 0.715 | 0.024 |
| 1371056_at   | U68726    | neogenin                                                                           | Neo1              | 1.082 | 0.833 | 0.580 | 0.025 | 1.029 | 0.905 | 0.453 | 0.004 |
| 1374508_at   | BG663343  | nephronophthisis 1 (juvenile) homolog (human) (predicted)                          | Nphp1_predicted   | 0.674 | 0.036 | 2.410 | 0.066 | 0.457 | 0.009 | 1.728 | 0.028 |
| 1369948_at   | NM_053401 | nerve growth factor receptor (TNFRSF16) associated protein 1                       | Ngfrap1           | 0.666 | 0.069 | 0.924 | 0.063 | 0.362 | 0.005 | 0.819 | 0.009 |
| 1385534_at   | BG381021  | nerve growth factor receptor (TNFRSF16) associated protein 1                       | Ngfrap1           | 0.844 | 0.187 | 0.937 | 0.271 | 0.685 | 0.079 | 0.965 | 0.024 |
| 1367961_at   | NM_031523 | nerve growth factor, gamma                                                         | Ngfg              | 1.199 | 0.693 | 0.541 | 0.025 | 0.224 | 0.051 | 0.522 | 0.013 |
| 1372528_at   | AI102069  | N-ethylmaleimide sensitive fusion protein                                          | Nsf               | 0.282 | 0.118 | 0.466 | 0.004 | 0.493 | 0.030 | 0.667 | 0.029 |
| 1369689_at   | AF142097  | N-ethylmaleimide sensitive fusion protein                                          | Nsf               | 0.677 | 0.174 | 0.505 | 0.161 | 0.646 | 0.175 | 0.520 | 0.198 |
| 1369690_at   | AI547471  | N-ethylmaleimide sensitive fusion protein                                          | Nsf               | 1.021 | 0.403 | 0.506 | 0.001 | 0.842 | 0.317 | 0.530 | 0.001 |
| 1398782_at   | NM_080585 | N-ethylmaleimide sensitive fusion protein attachment protein alpha                 | Napa              | 0.642 | 0.077 | 1.044 | 0.503 | 0.642 | 0.008 | 0.863 | 0.021 |
| 1368320_at   | NM_031521 | neural cell adhesion molecule 1                                                    | Ncam1             | 0.480 | 0.030 | 1.147 | 0.808 | 0.434 | 0.009 | 0.689 | 0.569 |
| 1391235_at   | BF394807  | Neural cell adhesion molecule 1                                                    | Ncam1             | 0.997 | 0.663 | 1.005 | 0.600 | 1.022 | 0.321 | 0.993 | 0.936 |
| 1396764_at   | BF400138  | Neural cell adhesion molecule 1                                                    | Ncam1             | 1.665 | 0.868 | 0.691 | 0.629 | 1.009 | 0.955 | 0.945 | 0.314 |
| 1396893_at   | AI576209  | Neural cell adhesion molecule 1                                                    | Ncam1             | 0.997 | 0.992 | 0.936 | 0.615 | 0.997 | 0.978 | 0.934 | 0.689 |
| 1397120_at   | BF409530  | Neural cell adhesion molecule 1                                                    | Ncam1             | 0.991 | 0.992 | 0.558 | 0.527 | 1.010 | 0.585 | 0.993 | 0.772 |
| 1389507_at   | AI072446  | neural precursor cell expressed, developmentally down-regulated 4-like             | Nedd4l            | 0.850 | 0.397 | 1.373 | 0.124 | 0.581 | 0.016 | 1.078 | 0.769 |
| 1379457_at   | AI013407  | neural precursor cell expressed, developmentally down-regulated gene 1 (predicted) | Nedd1_predicted   | 1.000 | 0.968 | 0.996 | 0.930 | 1.001 | 0.993 | 0.998 | 0.163 |
| 1395157_at   | BI286685  | neural precursor cell expressed, developmentally down-regulated gene 4A            | Nedd4a            | 0.740 | 0.010 | 0.248 | 0.304 | 0.954 | 0.976 | 0.411 | 0.100 |
| 1383899_at   | BI277849  | neural precursor cell expressed, developmentally down-regulated gene 4A            | Nedd4a            | 0.924 | 0.050 | 1.374 | 0.334 | 1.056 | 0.996 | 1.305 | 0.501 |
| 1375119_at   | BI284798  | neural precursor cell expressed, developmentally down-regulated gene 4A            | Nedd4a            | 0.472 | 0.130 | 0.780 | 0.073 | 0.634 | 0.074 | 0.707 | 0.014 |
| 1371314_at   | BM389736  | neural precursor cell expressed, developmentally down-regulated gene 4A            | Nedd4a            | 0.555 | 0.191 | 0.417 | 0.005 | 0.664 | 0.185 | 0.422 | 0.001 |
| 1386263_at   | AI227677  | neural precursor cell expressed, developmentally down-regulated gene 4A            | Nedd4a            | 0.706 | 0.314 | 0.642 | 0.051 | 0.679 | 0.176 | 0.592 | 0.021 |
| 1398860_at   | AF095740  | neural precursor cell expressed, developmentally down-regulated gene 8             | Nedd8             | 0.858 | 0.804 | 1.071 | 0.706 | 0.740 | 0.279 | 1.140 | 0.351 |
| 1374650_at   | BM392374  | neural precursor cell expressed, developmentally down-regulated gene 9             | Nedd9             | 0.663 | 0.039 | 0.486 | 0.014 | 0.448 | 0.006 | 0.532 | 0.015 |
| 1372773_at   | BM389728  | neural proliferation, differentiation and control, 1                               | Npdc1             | 0.901 | 0.763 | 1.151 | 0.020 | 0.912 | 0.655 | 1.057 | 0.158 |
| 1375684_at   | BE111846  | neuraminidase 1                                                                    | Neu1              | 0.629 | 0.171 | 0.979 | 0.471 | 0.584 | 0.148 | 0.965 | 0.398 |
| 1369081_at   | NM_031522 | neuraminidase 1                                                                    | Neu1              | 0.981 | 0.902 | 1.825 | 0.099 | 0.983 | 0.914 | 0.862 | 0.291 |
| 1369404_a_at | NM_021767 | neurexin 1                                                                         | Nrxn1             | 0.997 | 0.530 | 1.128 | 0.953 | 1.136 | 0.883 | 1.083 | 0.563 |
| 1386697_at   | BF567897  | neurexophilin 1                                                                    | Nxph1             | 0.992 | 0.976 | 0.977 | 0.962 | 0.992 | 0.978 | 1.016 | 0.997 |
| 1389663_at   | BI278423  | neurobeachin-like 2 (predicted)                                                    | Nbeal2_predicted  | 0.774 | 0.298 | 0.671 | 0.025 | 0.621 | 0.376 | 0.795 | 0.261 |
| 1387678_at   | NM_080766 | neuroblastoma ras oncogene                                                         | Nras              | 1.211 | 0.123 | 0.779 | 0.062 | 0.916 | 0.558 | 0.846 | 0.064 |
| 1372953_at   | AI101330  | neurocalcin delta                                                                  | Ncald             | 0.238 | 0.018 | 0.168 | 0.000 | 0.228 | 0.004 | 0.201 | 0.003 |
| 1392581_at   | BF420172  | neurocalcin delta                                                                  | Ncald             | 0.391 | 0.036 | 0.137 | 0.000 | 0.308 | 0.047 | 0.139 | 0.000 |
| 1367956_at   | NM_053543 | neurochondrin                                                                      | Ncdn              | 0.511 | 0.060 | 0.582 | 0.008 | 0.450 | 0.001 | 0.573 | 0.006 |
| 1372000_at   | AI180187  | neuroepithelial cell transforming gene 1                                           | Net1              | 1.371 | 0.121 | 1.385 | 0.013 | 0.939 | 0.849 | 1.259 | 0.039 |
| 1370876_at   | BI285436  | neurofascin                                                                        | Nfasc             | 1.578 | 0.071 | 1.778 | 0.013 | 1.000 | 0.272 | 1.294 | 0.077 |
| 1392822_at   | AA957509  | Neurofibromatosis 1                                                                | Nf1               | 0.760 | 0.608 | 1.649 | 0.072 | 1.010 | 0.985 | 0.825 | 0.989 |
| 1375994_at   | BE107324  | Neurofibromatosis 1                                                                | Nf1               | 1.011 | 0.969 | 0.612 | 0.031 | 0.999 | 0.994 | 0.711 | 0.057 |
| 1397682_at   | AW917689  | Neurofibromatosis 1                                                                | Nf1               | 1.008 | 0.979 | 1.017 | 0.326 | 0.904 | 0.635 | 0.493 | 0.102 |

|              |           |                                                                                                            |                      |       |       |       |       |       |       |       |       |
|--------------|-----------|------------------------------------------------------------------------------------------------------------|----------------------|-------|-------|-------|-------|-------|-------|-------|-------|
| 1367845_at   | NM_017029 | neurofilament 3, medium                                                                                    | Nef3                 | 2.314 | 0.018 | 3.538 | 0.000 | 3.604 | 0.009 | 4.292 | 0.001 |
| 1370815_at   | AF031879  | neurofilament, heavy polypeptide                                                                           | Nefh                 | 0.274 | 0.000 | 0.913 | 0.253 | 0.271 | 0.001 | 0.904 | 0.515 |
| 1387288_at   | NM_019218 | neurogenic differentiation 1                                                                               | Neurod1              | 1.130 | 0.032 | 0.518 | 0.013 | 0.969 | 0.796 | 0.583 | 0.061 |
| 1397705_at   | BF542792  | neuroligin 2                                                                                               | Nlgn2                | 1.220 | 0.565 | 1.035 | 0.920 | 1.079 | 0.937 | 0.796 | 0.678 |
| 1368895_at   | NM_053992 | neuroligin 2                                                                                               | Nlgn2                | 1.057 | 0.914 | 0.587 | 0.009 | 0.974 | 0.900 | 0.515 | 0.029 |
| 1369669_at   | NM_053970 | neurolysin (metallopeptidase M3 family)                                                                    | Nln                  | 4.484 | 0.006 | 2.845 | 0.006 | 4.342 | 0.007 | 2.974 | 0.012 |
| 1375991_at   | BE120163  | neuromedin B (predicted)                                                                                   | Nmb_predicted        | 0.813 | 0.299 | 1.191 | 0.036 | 0.633 | 0.083 | 1.049 | 0.777 |
| 1369717_at   | M94555    | neuromedin U                                                                                               | Nmu                  | 0.908 | 0.974 | 0.977 | 0.966 | 0.998 | 0.953 | 1.003 | 0.982 |
| 1375381_at   | AW252503  | Neuron derived neurotrophic factor                                                                         | Nenf                 | 0.809 | 0.106 | 0.899 | 0.399 | 0.997 | 0.156 | 0.990 | 0.843 |
| 1381184_at   | BF396578  | Neuron navigator 2                                                                                         | Nav2                 | 1.069 | 0.855 | 0.403 | 0.320 | 0.960 | 0.828 | 0.810 | 0.293 |
| 1387817_at   | NM_024128 | neuron specific gene family member 1                                                                       | Nsg1                 | 0.423 | 0.007 | 0.095 | 0.000 | 0.552 | 0.012 | 0.080 | 0.020 |
| 1398024_at   | BE110250  | Neuronal PAS domain protein 2 (predicted)                                                                  | Npas2_predicted      | 0.896 | 0.811 | 1.001 | 0.995 | 0.916 | 0.059 | 0.998 | 0.990 |
| 1376362_at   | BG380575  | neuronal pentraxin receptor                                                                                | Nptxr                | 0.461 | 0.004 | 0.677 | 0.093 | 0.383 | 0.002 | 0.454 | 0.002 |
| 1371412_a_at | BE107450  | Neuronal regeneration related protein                                                                      | Nrep                 | 0.701 | 0.270 | 0.179 | 0.007 | 0.427 | 0.303 | 0.197 | 0.019 |
| 1369999_a_at | NM_053601 | neuronatin                                                                                                 | Nnat                 | 0.607 | 0.544 | 0.288 | 0.006 | 0.925 | 0.257 | 0.296 | 0.014 |
| 1371036_at   | BG671431  | neuron-glia-CAM-related cell adhesion molecule                                                             | Nrcam                | 1.280 | 0.024 | 1.543 | 0.007 | 0.530 | 0.004 | 1.077 | 0.708 |
| 1381621_at   | BF386153  | Neuron-glia-CAM-related cell adhesion molecule                                                             | Nrcam                | 1.719 | 0.380 | 1.639 | 0.173 | 0.736 | 0.299 | 1.324 | 0.290 |
| 1377001_at   | AI406747  | neuron-glia-CAM-related cell adhesion molecule                                                             | Nrcam                | 1.093 | 0.642 | 0.881 | 0.700 | 0.906 | 0.066 | 0.676 | 0.318 |
| 1392734_at   | AI145667  | neuron-glia-CAM-related cell adhesion molecule                                                             | Nrcam                | 1.241 | 0.698 | 2.068 | 0.018 | 0.499 | 0.043 | 0.892 | 0.561 |
| 1395083_at   | AA926313  | Neuro-oncological ventral antigen 1                                                                        | Nova1                | 0.341 | 0.011 | 0.223 | 0.000 | 0.679 | 0.064 | 0.370 | 0.010 |
| 1377049_at   | BE107890  | neuropathy target esterase like 1                                                                          | Ntel1                | 0.766 | 0.307 | 4.050 | 0.036 | 1.046 | 0.833 | 1.982 | 0.056 |
| 1387154_at   | NM_012614 | neuropeptide Y                                                                                             | Npy                  | 0.960 | 0.870 | 0.888 | 0.670 | 0.656 | 0.079 | 0.765 | 0.024 |
| 1373577_at   | BE116566  | Neuropilin 1                                                                                               | Nrp1                 | 3.881 | 0.001 | 1.271 | 0.738 | 5.087 | 0.023 | 1.280 | 0.715 |
| 1382995_at   | AA859669  | Neuropilin 2                                                                                               | Nrp2                 | 1.576 | 0.397 | 1.488 | 0.075 | 1.640 | 0.191 | 1.456 | 0.071 |
| 1395070_at   | AI136959  | Neurotrimin                                                                                                | Hnt                  | 0.566 | 0.098 | 0.786 | 0.368 | 0.647 | 0.053 | 0.669 | 0.358 |
| 1368255_at   | NM_017354 | neurotrimin /// hypothetical gene supported by NM_017354                                                   | Hnt /// LOC360435    | 0.166 | 0.000 | 0.266 | 0.004 | 0.204 | 0.023 | 0.352 | 0.002 |
| 1369000_at   | NM_021589 | neurotrophic tyrosine kinase, receptor, type 1                                                             | Ntrk1                | 0.206 | 0.017 | 0.231 | 0.228 | 0.266 | 0.034 | 0.270 | 0.026 |
| 1375615_at   | AI575310  | Neurotrophic tyrosine kinase, receptor, type 1                                                             | Ntrk1                | 0.514 | 0.297 | 0.405 | 0.019 | 0.789 | 0.145 | 0.405 | 0.012 |
| 1370687_a_at | M55292    | neurotrophic tyrosine kinase, receptor, type 2                                                             | Ntrk2                | 0.397 | 0.050 | 0.290 | 0.091 | 0.465 | 0.010 | 0.330 | 0.109 |
| 1383135_at   | BG669126  | Neurotrophic tyrosine kinase, receptor, type 2                                                             | Ntrk2                | 0.647 | 0.059 | 0.126 | 0.005 | 0.977 | 0.176 | 0.265 | 0.000 |
| 1397246_at   | BE102996  | Neurotrophic tyrosine kinase, receptor, type 2                                                             | Ntrk2                | 0.998 | 0.223 | 0.239 | 0.007 | 1.017 | 0.868 | 0.252 | 0.005 |
| 1368939_a_at | L14447    | neurotrophic tyrosine kinase, receptor, type 3                                                             | Ntrk3                | 1.002 | 0.818 | 0.994 | 0.974 | 1.158 | 0.315 | 0.828 | 0.923 |
| 1377080_at   | AI598730  | neurotrophin receptor associated death domain                                                              | Nradd                | 0.970 | 0.105 | 0.842 | 0.166 | 0.884 | 0.414 | 0.706 | 0.147 |
| 1372039_at   | AI406810  | NFKB inhibitor interacting Ras-like protein 2 (predicted)                                                  | Nkiras2_predicted    | 1.229 | 0.174 | 1.076 | 0.831 | 1.008 | 0.971 | 0.985 | 0.961 |
| 1377091_at   | AW524733  | NG5 protein                                                                                                | Ng5                  | 1.137 | 0.648 | 1.172 | 0.228 | 0.959 | 0.310 | 1.147 | 0.180 |
| 1369409_at   | NM_022856 | Ngfi-A binding protein 1                                                                                   | Nab1                 | 1.886 | 0.010 | 1.665 | 0.046 | 1.973 | 0.009 | 1.590 | 0.014 |
| 1393172_at   | AA848648  | Ngfi-A binding protein 1                                                                                   | Nab1                 | 2.825 | 0.013 | 1.399 | 0.136 | 2.748 | 0.009 | 1.464 | 0.012 |
| 1374925_at   | AI102530  | Ngfi-A binding protein 2                                                                                   | Nab2                 | 1.150 | 0.169 | 1.680 | 0.207 | 1.817 | 0.189 | 1.073 | 0.755 |
| 1383289_at   | BG373214  | Ngg1 interacting factor 3-like 1 (S. pombe)                                                                | Nif3l1               | 1.177 | 0.569 | 0.997 | 0.538 | 0.758 | 0.058 | 1.430 | 0.332 |
| 1387977_at   | AF218575  | nibrin                                                                                                     | Nbn                  | 1.264 | 0.439 | 1.592 | 0.001 | 1.564 | 0.038 | 1.683 | 0.005 |
| 1374497_at   | AI102943  | nicalin homolog (zebrafish)                                                                                | Ncln                 | 0.633 | 0.067 | 0.893 | 0.425 | 0.958 | 0.605 | 0.676 | 0.043 |
| 1396543_at   | BE099968  | nicastrin                                                                                                  | Ncstn                | 1.289 | 0.534 | 0.783 | 0.102 | 1.023 | 0.773 | 0.508 | 0.055 |
| 1367511_at   | BI285459  | nicastrin                                                                                                  | Ncstn                | 0.997 | 0.994 | 0.552 | 0.005 | 0.964 | 0.432 | 0.580 | 0.021 |
| 1398610_at   | BG375744  | nicolin 1                                                                                                  | Nicn1                | 0.547 | 0.005 | 0.594 | 0.040 | 0.385 | 0.000 | 0.646 | 0.012 |
| 1383065_at   | AW434166  | nicolin 1                                                                                                  | Nicn1                | 0.958 | 0.830 | 0.849 | 0.486 | 0.830 | 0.751 | 0.954 | 0.297 |
| 1394718_at   | BF396080  | Nicotinamide nucleotide adenylyltransferase 2 (predicted)                                                  | Nmnat2_predicted     | 1.684 | 0.328 | 0.782 | 0.765 | 2.109 | 0.098 | 1.084 | 0.773 |
| 1374025_at   | AA963282  | nicotinamide nucleotide adenylyltransferase 3 /// similar to Nicotinamide nucleotide adenylyltransferase 3 | Nmnat3 /// LOC501040 | 0.854 | 0.526 | 2.105 | 0.016 | 1.162 | 0.577 | 2.091 | 0.058 |
| 1371483_at   | AA891872  | nicotinamide nucleotide transhydrogenase (mapped)                                                          | Nnt_mapped           | 0.552 | 0.280 | 0.490 | 0.001 | 0.443 | 0.039 | 0.634 | 0.005 |
| 1381261_at   | BE113729  | Nicotinamide nucleotide transhydrogenase (mapped)                                                          | Nnt_mapped           | 1.531 | 0.921 | 0.534 | 0.456 | 1.221 | 0.257 | 0.516 | 0.548 |
| 1375436_at   | BF416417  | nicotinate phosphoribosyltransferase domain containing 1                                                   | Naprt1               | 0.618 | 0.106 | 1.419 | 0.554 | 0.680 | 0.156 | 0.886 | 0.280 |
| 1395411_at   | AW916787  | nicotinate phosphoribosyltransferase domain containing 1                                                   | Naprt1               | 0.981 | 0.959 | 0.910 | 0.240 | 1.003 | 0.982 | 0.626 | 0.159 |
| 1371032_at   | BG372942  | nidogen 1                                                                                                  | Nid1                 | 0.670 | 0.060 | 0.551 | 0.004 | 0.681 | 0.087 | 0.574 | 0.001 |
| 1388618_at   | BM389302  | nidogen 2                                                                                                  | Nid2                 | 0.942 | 0.625 | 1.035 | 0.770 | 0.925 | 0.631 | 1.000 | 0.999 |
| 1398892_at   | BI287960  | Niemann Pick type C2                                                                                       | Npc2                 | 0.978 | 0.747 | 1.280 | 0.085 | 0.908 | 0.834 | 1.195 | 0.137 |
| 1375271_at   | BE118382  | NIMA (never in mitosis gene a)- related kinase 9 (predicted)                                               | Nek9_predicted       | 1.011 | 0.969 | 0.998 | 0.876 | 0.990 | 0.921 | 1.002 | 0.984 |
| 1397316_at   | AI179830  | NIMA (never in mitosis gene a)- related kinase 9 (predicted)                                               | Nek9_predicted       | 0.994 | 0.991 | 1.035 | 0.950 | 1.764 | 0.314 | 1.047 | 0.787 |
| 1389996_at   | AI406369  | NIMA (never in mitosis gene a)-related expressed kinase 1 (predicted)                                      | Nek1_predicted       | 0.840 | 0.946 | 0.725 | 0.010 | 0.658 | 0.067 | 0.628 | 0.010 |
| 1382284_at   | AW525175  | NIMA (never in mitosis gene a)-related expressed kinase 3 (predicted)                                      | Nek3_predicted       | 1.518 | 0.101 | 0.993 | 0.960 | 0.946 | 0.996 | 1.074 | 0.207 |
| 1374565_at   | BF282365  | NIMA (never in mitosis gene a)-related expressed kinase 6                                                  | Nek6                 | 1.638 | 0.422 | 1.288 | 0.246 | 0.978 | 0.878 | 0.988 | 0.934 |
| 1388878_at   | BI279756  | nin one binding protein                                                                                    | Nob1p                | 1.371 | 0.399 | 2.157 | 0.003 | 0.916 | 0.716 | 1.894 | 0.009 |
| 1370348_at   | U72660    | ninjurin 1                                                                                                 | Ninj1                | 0.764 | 0.733 | 3.304 | 0.006 | 1.095 | 0.871 | 2.909 | 0.007 |



|              |           |                                                                                    |                                  |         |       |         |       |         |       |        |       |
|--------------|-----------|------------------------------------------------------------------------------------|----------------------------------|---------|-------|---------|-------|---------|-------|--------|-------|
| 1384801_at   | AA963592  | Nipped-B homolog (Drosophila)                                                      | NIPBL                            | 1.864   | 0.006 | 1.398   | 0.019 | 1.689   | 0.056 | 1.861  | 0.003 |
| 1392470_at   | AI180223  | Nipped-B homolog (Drosophila)                                                      | NIPBL                            | 1.434   | 0.035 | 0.917   | 0.702 | 1.599   | 0.139 | 1.411  | 0.049 |
| 1380371_at   | BE117361  | Nipped-B homolog (Drosophila)                                                      | NIPBL                            | 0.788   | 0.186 | 1.309   | 0.631 | 1.008   | 0.465 | 1.918  | 0.402 |
| 1395923_at   | BF416343  | Nipped-B homolog (Drosophila)                                                      | NIPBL                            | 1.005   | 0.438 | 0.742   | 0.138 | 1.002   | 0.881 | 0.615  | 0.140 |
| 1371782_at   | BF283798  | nipsnap homolog 3A (C. elegans)                                                    | Nipsnap3a                        | 0.621   | 0.216 | 1.166   | 0.299 | 0.279   | 0.041 | 0.996  | 0.997 |
| 1374566_at   | AI237243  | Nischarin                                                                          | Nisch                            | 0.636   | 0.070 | 0.448   | 0.005 | 0.759   | 0.010 | 0.636  | 0.043 |
| 1371558_at   | BI282284  | nischarin                                                                          | Nisch                            | 0.963   | 0.166 | 0.744   | 0.020 | 0.948   | 0.994 | 0.769  | 0.023 |
| 1382686_at   | BF285846  | Nischarin                                                                          | Nisch                            | 1.270   | 0.537 | 0.792   | 0.241 | 1.094   | 0.635 | 0.720  | 0.172 |
| 1394957_at   | BE108587  | nischarin                                                                          | Nisch                            | 0.784   | 0.998 | 0.574   | 0.142 | 1.002   | 0.999 | 0.820  | 0.036 |
| 1387667_at   | L12562    | nitric oxide synthase 2, inducible                                                 | Nos2                             | 374.969 | 0.000 | 113.753 | 0.000 | 109.349 | 0.004 | 57.801 | 0.003 |
| 1371397_at   | AI104068  | nitric oxide synthase interacting protein (predicted)                              | Nosip_predicted                  | 0.998   | 0.977 | 1.190   | 0.992 | 1.002   | 0.997 | 1.001  | 0.999 |
| 1388324_at   | BG668463  | nitrilase 1                                                                        | Nit1                             | 0.561   | 0.028 | 0.665   | 0.017 | 0.487   | 0.003 | 0.701  | 0.033 |
| 1398049_at   | BF405475  | nitrilase 1                                                                        | Nit1                             | 0.957   | 0.810 | 0.374   | 0.010 | 0.993   | 0.207 | 0.559  | 0.006 |
| 1372438_at   | AI411100  | nitrilase family, member 2                                                         | Nit2                             | 0.388   | 0.400 | 0.477   | 0.007 | 0.397   | 0.172 | 0.221  | 0.037 |
| 1387859_at   | AI410876  | nitrogen fixation gene 1 (S. cerevisiae)                                           | Nfs1                             | 0.608   | 0.014 | 0.444   | 0.000 | 0.784   | 0.078 | 0.481  | 0.002 |
| 1385387_at   | AA925143  | NK2 transcription factor related, locus 2 (Drosophila) (predicted)                 | Nkx2-2_predicted                 | 1.234   | 0.332 | 0.232   | 0.000 | 1.179   | 0.997 | 0.434  | 0.091 |
| 1368998_at   | NM_031737 | NK6 transcription factor related, locus 1 (Drosophila)                             | Nkx6-1                           | 0.823   | 0.103 | 0.465   | 0.000 | 0.493   | 0.005 | 0.567  | 0.005 |
| 1393248_at   | BF407833  | NMD3 homolog (S. cerevisiae) (predicted)                                           | Nmd3_predicted                   | 0.885   | 0.339 | 2.106   | 0.000 | 0.897   | 0.166 | 1.795  | 0.001 |
| 1372558_at   | AI177404  | NMDA receptor-regulated gene 1 (predicted)                                         | Narg1_predicted                  | 0.854   | 0.320 | 1.465   | 0.002 | 1.141   | 0.173 | 1.298  | 0.124 |
| 1393078_at   | BG671648  | NMDA receptor-regulated gene 1 (predicted)                                         | Narg1_predicted                  | 0.999   | 0.446 | 1.483   | 0.040 | 0.993   | 0.780 | 1.362  | 0.975 |
| 1383514_s_at | BG671648  | NMDA receptor-regulated gene 1 (predicted)                                         | Narg1_predicted                  | 0.814   | 0.872 | 1.695   | 0.196 | 0.814   | 0.068 | 1.133  | 0.870 |
| 1393881_at   | AW527638  | NMDA receptor-regulated gene 1 (predicted)                                         | Narg1_predicted                  | 1.027   | 0.900 | 2.240   | 0.064 | 0.828   | 0.280 | 2.099  | 0.234 |
| 1368410_at   | NM_012601 | N-methylpurine-DNA glycosylase                                                     | Mpg                              | 0.361   | 0.006 | 0.589   | 0.040 | 0.455   | 0.001 | 0.590  | 0.063 |
| 1393144_at   | BM388202  | N-myc (and STAT) interactor                                                        | Nmi                              | 4.707   | 0.002 | 7.363   | 0.000 | 12.694  | 0.001 | 9.040  | 0.000 |
| 1381875_at   | BM386847  | N-myc (and STAT) interactor                                                        | Nmi                              | 19.101  | 0.007 | 14.404  | 0.001 | 18.039  | 0.001 | 18.040 | 0.001 |
| 1391458_at   | BE120446  | N-myc downstream regulated gene 1                                                  | Ndrg1                            | 0.689   | 0.035 | 1.582   | 0.343 | 0.645   | 0.044 | 1.014  | 0.963 |
| 1371360_at   | BM384099  | N-myc downstream regulated gene 1                                                  | Ndrg1                            | 1.153   | 0.445 | 1.141   | 0.438 | 0.730   | 0.115 | 1.134  | 0.202 |
| 1370229_at   | BG666709  | N-myc downstream regulated gene 4                                                  | Ndrg4                            | 0.533   | 0.000 | 1.808   | 0.020 | 0.465   | 0.001 | 1.621  | 0.032 |
| 1375522_at   | AI010491  | N-myristoyltransferase 1                                                           | Nmt1                             | 1.358   | 0.193 | 4.460   | 0.001 | 1.488   | 0.107 | 2.863  | 0.001 |
| 1384878_at   | AI501085  | N-myristoyltransferase 2                                                           | Nmt2                             | 1.419   | 0.084 | 3.795   | 0.000 | 1.230   | 0.217 | 1.717  | 0.024 |
| 1380305_at   | BE106776  | NOD3-like protein                                                                  | nod3l                            | 0.526   | 0.351 | 0.232   | 0.041 | 0.527   | 0.337 | 0.193  | 0.043 |
| 1389658_at   | BI283104  | NOL1/NOP2/Sun domain family, member 2 (predicted)                                  | Nsun2_predicted                  | 0.830   | 0.026 | 1.829   | 0.003 | 0.827   | 0.014 | 1.250  | 0.042 |
| 1373509_at   | BE113288  | NOL1/NOP2/Sun domain family, member 4 (predicted)                                  | Nsun4_predicted                  | 0.570   | 0.000 | 0.600   | 0.021 | 0.570   | 0.009 | 0.525  | 0.058 |
| 1389061_at   | AI171164  | NOL1/NOP2/Sun domain family, member 5 (predicted)                                  | Nsun5_predicted                  | 0.803   | 0.069 | 2.739   | 0.677 | 1.084   | 0.787 | 1.770  | 0.587 |
| 1380165_at   | AI234713  | Non-catalytic region of tyrosine kinase adaptor protein 1 (predicted)              | Nck1_predicted                   | 1.237   | 0.534 | 1.596   | 0.480 | 1.262   | 0.792 | 1.194  | 0.440 |
| 1373940_at   | BM386507  | non-catalytic region of tyrosine kinase adaptor protein 1 (predicted)              | Nck1_predicted                   | 0.773   | 0.901 | 1.500   | 0.406 | 0.946   | 0.694 | 1.594  | 0.336 |
| 1398441_at   | AA957410  | non-catalytic region of tyrosine kinase adaptor protein 2 (predicted)              | Nck2_predicted                   | 1.510   | 0.207 | 1.694   | 0.012 | 0.934   | 0.640 | 1.633  | 0.001 |
| 1368863_at   | NM_053507 | non-metastatic cell expressed protein 3                                            | Nme3                             | 0.294   | 0.073 | 0.199   | 0.001 | 0.277   | 0.006 | 0.221  | 0.022 |
| 1370446_at   | AF202049  | non-metastatic cells 7, protein expressed in                                       | Nme7                             | 0.554   | 0.006 | 0.573   | 0.045 | 0.668   | 0.007 | 0.675  | 0.075 |
| 1398904_at   | AI599066  | non-POU domain containing, octamer-binding /// similar to Nono protein (predicted) | Nono ///<br>RGD1561770_predicted | 0.902   | 0.255 | 0.916   | 0.543 | 1.286   | 0.216 | 1.090  | 0.148 |
| 1384257_at   | BF555394  | non-POU domain containing, octamer-binding /// similar to Nono protein (predicted) | Nono ///<br>RGD1561770_predicted | 1.095   | 0.429 | 2.480   | 0.011 | 1.067   | 0.688 | 2.037  | 0.011 |
| 1390426_at   | BF389398  | Notch gene homolog 1 (Drosophila)                                                  | Notch1                           | 2.337   | 0.013 | 1.511   | 0.031 | 4.955   | 0.002 | 1.866  | 0.005 |
| 1398362_at   | AI011448  | Notch gene homolog 2 (Drosophila)                                                  | Notch2                           | 1.959   | 0.019 | 2.476   | 0.014 | 1.356   | 0.148 | 2.150  | 0.113 |
| 1389765_at   | BI276730  | notchless homolog 1 (Drosophila) (predicted)                                       | Nle1_predicted                   | 1.003   | 0.950 | 1.237   | 0.264 | 0.645   | 0.824 | 1.011  | 0.887 |
| 1372932_at   | BI302258  | novel nuclear protein 1                                                            | Nnp1                             | 0.384   | 0.045 | 0.843   | 0.047 | 0.469   | 0.038 | 0.847  | 0.012 |
| 1388340_at   | BF281153  | NS5A (hepatitis C virus) transactivated protein 9                                  | Ns5atp9                          | 0.985   | 0.875 | 0.337   | 0.012 | 0.866   | 0.848 | 0.606  | 0.033 |
| 1398772_at   | NM_031981 | NSFL1 (p97) cofactor (p47)                                                         | Nsfl1c                           | 0.840   | 0.606 | 1.672   | 0.084 | 0.661   | 0.032 | 1.213  | 0.547 |
| 1371908_at   | AA891920  | NTF2-related export protein 1 (predicted)                                          | Nxt1_predicted                   | 0.492   | 0.005 | 2.582   | 0.064 | 0.605   | 0.191 | 2.145  | 0.090 |
| 1376553_at   | BI284353  | nth (endonuclease III)-like 1 (E.coli) (predicted)                                 | Nth1l_predicted                  | 0.650   | 0.076 | 1.104   | 0.517 | 0.663   | 0.073 | 0.683  | 0.199 |
| 1383614_at   | BI295051  | NUAK family, SNF1-like kinase, 2                                                   | Nuak2                            | 3.365   | 0.002 | 2.158   | 0.065 | 7.166   | 0.001 | 2.136  | 0.067 |
| 1378264_at   | BG375928  | Nuclear autoantigenic sperm protein (histone-binding)                              | Nasp                             | 1.068   | 0.623 | 0.961   | 0.045 | 0.935   | 0.890 | 1.110  | 0.240 |
| 1377299_at   | AI137618  | nuclear autoantigenic sperm protein (histone-binding)                              | Nasp                             | 1.001   | 0.993 | 1.259   | 0.038 | 0.740   | 0.777 | 1.081  | 0.492 |
| 1373978_at   | AI410277  | nuclear cap binding protein subunit 1, 80kDa                                       | Ncbp1                            | 0.434   | 0.034 | 1.388   | 0.036 | 0.516   | 0.012 | 1.554  | 0.018 |
| 1383965_at   | BI282103  | nuclear cap binding protein subunit 2 (predicted)                                  | Ncbp2_predicted                  | 0.844   | 0.140 | 0.995   | 0.570 | 1.343   | 0.043 | 1.098  | 0.452 |
| 1396264_at   | BF397752  | Nuclear cap binding protein subunit 2 (predicted)                                  | Ncbp2_predicted                  | 0.827   | 0.267 | 1.146   | 0.304 | 1.961   | 0.024 | 1.174  | 0.454 |
| 1385553_at   | AI136699  | nuclear cap binding protein subunit 2 (predicted)                                  | Ncbp2_predicted                  | 0.962   | 0.798 | 1.810   | 0.008 | 0.670   | 0.055 | 1.593  | 0.030 |
| 1392858_at   | BM387770  | nuclear cap binding protein subunit 2 (predicted)                                  | Ncbp2_predicted                  | 0.700   | 0.805 | 0.731   | 0.455 | 0.987   | 0.437 | 0.996  | 0.708 |
| 1368436_at   | NM_017271 | nuclear distribution gene C homolog (Aspergillus)                                  | Nudc                             | 0.632   | 0.123 | 1.931   | 0.004 | 0.667   | 0.009 | 1.912  | 0.004 |
| 1398105_at   | AI548809  | Nuclear factor I/A                                                                 | Nfia                             | 1.358   | 0.234 | 0.993   | 0.927 | 1.114   | 0.564 | 0.984  | 0.929 |

|              |           |                                                                                     |                  |        |       |        |       |        |       |        |       |
|--------------|-----------|-------------------------------------------------------------------------------------|------------------|--------|-------|--------|-------|--------|-------|--------|-------|
| 1369678_a_at | D78017    | nuclear factor I/A                                                                  | Nfia             | 0.998  | 0.758 | 1.002  | 0.717 | 0.820  | 0.556 | 0.724  | 0.478 |
| 1369679_a_at | AB060652  | nuclear factor I/A                                                                  | Nfia             | 0.947  | 0.962 | 0.797  | 0.318 | 0.918  | 0.309 | 1.006  | 0.962 |
| 1371202_a_at | AB012232  | nuclear factor I/B                                                                  | Nfib             | 4.143  | 0.001 | 1.474  | 0.049 | 1.565  | 0.919 | 1.090  | 0.623 |
| 1388250_at   | AB012232  | nuclear factor I/B                                                                  | Nfib             | 0.994  | 0.181 | 0.994  | 0.956 | 0.838  | 0.208 | 0.997  | 0.961 |
| 1394778_at   | BE116111  | Nuclear factor I/B                                                                  | Nfib             | 1.618  | 0.248 | 0.994  | 0.127 | 2.095  | 0.047 | 1.316  | 0.267 |
| 1375342_at   | BG381296  | Nuclear factor I/C                                                                  | Nfic             | 1.008  | 0.579 | 1.676  | 0.093 | 1.094  | 0.279 | 1.146  | 0.375 |
| 1370968_at   | AA858801  | nuclear factor of kappa light chain gene enhancer in B-cells 1, p105                | Nfkb1            | 19.062 | 0.003 | 7.672  | 0.001 | 17.755 | 0.000 | 7.481  | 0.002 |
| 1389538_at   | AW672589  | nuclear factor of kappa light chain gene enhancer in B-cells inhibitor, alpha       | Nfkbia           | 55.162 | 0.000 | 25.927 | 0.000 | 82.838 | 0.000 | 20.087 | 0.000 |
| 1367943_at   | NM_030867 | nuclear factor of kappa light chain gene enhancer in B-cells inhibitor, beta        | Nfkbib           | 4.401  | 0.056 | 7.259  | 0.001 | 5.777  | 0.005 | 5.671  | 0.002 |
| 1375989_a_at | AI170362  | nuclear factor of kappa light polypeptide gene enhancer in B-cells 2, p49/p100      | Nfkb2            | 12.319 | 0.000 | 10.630 | 0.000 | 18.223 | 0.000 | 11.327 | 0.000 |
| 1378724_at   | BI291716  | nuclear factor of kappa light polypeptide gene enhancer in B-cells inhibitor-like 1 | Nfkbil1          | 1.135  | 0.942 | 2.499  | 0.146 | 0.818  | 0.065 | 1.033  | 0.900 |
| 1376325_at   | BM388975  | Nuclear factor related to kappa B binding protein (predicted)                       | Nfrkb_predicted  | 1.120  | 0.527 | 1.010  | 0.299 | 1.135  | 0.387 | 0.797  | 0.214 |
| 1367826_at   | NM_031789 | nuclear factor, erythroid derived 2, like 2                                         | Nfe2l2           | 0.744  | 0.715 | 2.525  | 0.001 | 0.890  | 0.435 | 2.345  | 0.002 |
| 1378543_at   | BE108222  | Nuclear factor, erythroid derived 2, like 3 (predicted)                             | Nfe2l3_predicted | 0.574  | 0.010 | 0.728  | 0.055 | 0.686  | 0.048 | 0.588  | 0.171 |
| 1373278_at   | BM391303  | nuclear factor, erythroid derived 2,-like 1 (predicted)                             | Nfe2l1_predicted | 1.671  | 0.050 | 1.266  | 0.109 | 1.420  | 0.104 | 1.080  | 0.207 |
| 1375253_at   | BF403837  | nuclear factor, erythroid derived 2,-like 1 (predicted)                             | Nfe2l1_predicted | 1.062  | 0.589 | 2.341  | 0.027 | 1.058  | 0.740 | 1.534  | 0.330 |
| 1390068_at   | AI179123  | nuclear factor, erythroid derived 2,-like 1 (predicted)                             | Nfe2l1_predicted | 1.376  | 0.640 | 1.574  | 0.063 | 1.253  | 0.726 | 1.625  | 0.103 |
| 1368488_at   | NM_053727 | nuclear factor, interleukin 3 regulated                                             | Nfil3            | 0.908  | 0.321 | 9.018  | 0.000 | 1.350  | 0.862 | 5.977  | 0.009 |
| 1397114_at   | BF388191  | Nuclear fragile X mental retardation protein interacting protein 1                  | Nufip1           | 1.862  | 0.005 | 1.447  | 0.284 | 1.828  | 0.019 | 1.818  | 0.024 |
| 1376250_at   | BI284814  | nuclear fragile X mental retardation protein interacting protein 1                  | Nufip1           | 1.374  | 0.089 | 2.910  | 0.003 | 2.933  | 0.005 | 3.854  | 0.000 |
| 1394371_at   | BF556765  | nuclear fragile X mental retardation protein interacting protein 1                  | Nufip1           | 1.420  | 0.330 | 1.804  | 0.019 | 2.860  | 0.018 | 2.997  | 0.008 |
| 1387950_at   | AF158186  | nuclear import 7 homolog (S. cerevisiae)                                            | Nip7             | 0.995  | 0.474 | 2.448  | 0.001 | 0.818  | 0.203 | 1.714  | 0.005 |
| 1398913_at   | AI599394  | nuclear mitotic apparatus protein 1                                                 | Numa1            | 0.829  | 0.217 | 0.867  | 0.036 | 0.811  | 0.075 | 0.987  | 0.076 |
| 1382109_at   | BI301006  | nuclear NF-kappaB activating protein                                                | 2610020o08rik    | 0.982  | 0.632 | 0.936  | 0.763 | 0.936  | 0.506 | 1.250  | 0.406 |
| 1368654_at   | NM_012991 | nuclear pore associated protein                                                     | Npap60           | 0.877  | 0.673 | 1.527  | 0.264 | 1.059  | 0.867 | 1.072  | 0.276 |
| 1386957_at   | NM_053622 | nuclear pore membrane glycoprotein 121                                              | Pom121           | 0.674  | 0.174 | 0.902  | 0.027 | 0.708  | 0.038 | 0.981  | 0.307 |
| 1367919_at   | NM_053322 | nuclear pore membrane glycoprotein 210                                              | Pom210           | 1.035  | 0.643 | 0.954  | 0.912 | 0.865  | 0.132 | 0.676  | 0.062 |
| 1372295_at   | BF551356  | Nuclear prelamin A recognition factor                                               | Narf             | 0.496  | 0.001 | 0.505  | 0.004 | 0.553  | 0.001 | 0.667  | 0.009 |
| 1384009_at   | AI535383  | nuclear prelamin A recognition factor                                               | Narf             | 0.684  | 0.044 | 0.547  | 0.012 | 0.761  | 0.041 | 0.493  | 0.010 |
| 1398958_at   | BI278849  | nuclear prelamin A recognition factor-like                                          | Narfl            | 0.681  | 0.190 | 1.233  | 0.155 | 0.864  | 0.806 | 1.139  | 0.404 |
| 1367847_at   | NM_053611 | nuclear protein 1                                                                   | Nupr1            | 0.723  | 0.318 | 1.453  | 0.061 | 1.356  | 0.163 | 1.873  | 0.058 |
| 1368230_a_at | U95161    | nuclear protein E3-3                                                                | RGD708545        | 0.495  | 0.324 | 1.224  | 0.348 | 0.382  | 0.001 | 1.133  | 0.183 |
| 1381624_at   | BF391717  | Nuclear protein in the AT region (predicted)                                        | Npat_predicted   | 1.133  | 0.492 | 4.201  | 0.012 | 0.978  | 0.927 | 2.007  | 0.023 |
| 1393244_at   | AW435274  | Nuclear protein localization 4 homolog (S. cerevisiae)                              | Nploc4           | 0.650  | 0.829 | 0.713  | 0.164 | 0.761  | 0.077 | 0.754  | 0.043 |
| 1374996_at   | AI172269  | nuclear protein localization 4 homolog (S. cerevisiae)                              | Nploc4           | 0.793  | 0.914 | 0.949  | 0.829 | 0.686  | 0.121 | 0.876  | 0.088 |
| 1387921_at   | AB032932  | nuclear protein UKp68                                                               | Npuk68           | 1.613  | 0.005 | 3.109  | 0.002 | 1.500  | 0.006 | 2.729  | 0.000 |
| 1387152_at   | NM_022186 | nuclear receptor binding factor 2                                                   | Nrbf2            | 0.907  | 0.704 | 1.233  | 0.292 | 0.999  | 0.458 | 1.036  | 0.792 |
| 1379560_at   | BE099674  | nuclear receptor binding SET domain protein 1 (predicted)                           | Nsd1_predicted   | 1.224  | 0.030 | 2.328  | 0.022 | 0.896  | 0.455 | 2.184  | 0.007 |
| 1390010_at   | AI454081  | nuclear receptor coactivator 1 (predicted)                                          | Ncoa1_predicted  | 0.989  | 0.531 | 1.291  | 0.408 | 0.871  | 0.285 | 1.038  | 0.449 |
| 1396254_at   | BF401989  | Nuclear receptor coactivator 2                                                      | Ncoa2            | 1.473  | 0.055 | 1.734  | 0.034 | 1.523  | 0.045 | 1.257  | 0.100 |
| 1380638_at   | BI294907  | nuclear receptor coactivator 3                                                      | Ncoa3            | 1.170  | 0.645 | 1.864  | 0.044 | 1.249  | 0.237 | 1.634  | 0.042 |
| 1388549_at   | AI228248  | nuclear receptor coactivator 4 (predicted)                                          | Ncoa4_predicted  | 0.536  | 0.145 | 0.620  | 0.015 | 0.541  | 0.054 | 0.562  | 0.002 |
| 1389028_at   | BI291460  | nuclear receptor coactivator 6                                                      | Ncoa6            | 1.192  | 0.052 | 1.620  | 0.003 | 1.290  | 0.074 | 1.389  | 0.011 |
| 1392175_at   | AA956966  | Nuclear receptor co-repressor 1                                                     | Ncor1            | 1.298  | 0.032 | 1.413  | 0.107 | 0.984  | 0.210 | 1.019  | 0.493 |
| 1398976_at   | AA848674  | nuclear receptor co-repressor 1                                                     | Ncor1            | 1.115  | 0.302 | 1.599  | 0.009 | 1.027  | 0.742 | 1.185  | 0.029 |
| 1384293_at   | BE100543  | nuclear receptor co-repressor 1                                                     | Ncor1            | 0.885  | 0.374 | 1.022  | 0.710 | 0.773  | 0.106 | 0.915  | 0.037 |
| 1372102_at   | BF390024  | nuclear receptor co-repressor 1                                                     | Ncor1            | 0.903  | 0.665 | 1.764  | 0.026 | 1.107  | 0.763 | 1.878  | 0.104 |
| 1392392_at   | AI012510  | Nuclear receptor co-repressor 1                                                     | Ncor1            | 0.893  | 0.933 | 0.982  | 0.918 | 0.797  | 0.041 | 0.996  | 0.623 |
| 1372196_at   | BI284203  | nuclear receptor co-repressor 2 (predicted)                                         | Ncor2_predicted  | 1.689  | 0.009 | 0.849  | 0.592 | 1.129  | 0.690 | 1.580  | 0.066 |
| 1379982_at   | BE117278  | nuclear receptor interacting protein 1 (predicted)                                  | Nrip1_predicted  | 1.907  | 0.000 | 1.891  | 0.002 | 1.224  | 0.167 | 1.314  | 0.007 |
| 1370816_at   | M25804    | nuclear receptor subfamily 1, group D, member 1                                     | Nr1d1            | 3.122  | 0.010 | 13.653 | 0.002 | 2.307  | 0.038 | 7.741  | 0.007 |
| 1370541_at   | U20796    | nuclear receptor subfamily 1, group D, member 2                                     | Nr1d2            | 1.430  | 0.504 | 1.580  | 0.251 | 1.490  | 0.357 | 1.581  | 0.422 |
| 1389854_at   | AA956855  | Nuclear receptor subfamily 1, group H, member 2                                     | Nr1h2            | 1.328  | 0.115 | 1.542  | 0.008 | 1.512  | 0.165 | 1.360  | 0.044 |
| 1369073_at   | NM_021745 | nuclear receptor subfamily 1, group H, member 4                                     | Nr1h4            | 0.782  | 0.245 | 0.227  | 0.013 | 0.720  | 0.346 | 0.403  | 0.020 |
| 1380135_at   | AW531996  | Nuclear receptor subfamily 2, group C, member 2                                     | Nr2c2            | 1.076  | 0.109 | 0.913  | 0.302 | 0.999  | 0.318 | 1.005  | 0.629 |
| 1392219_at   | AI145523  | Nuclear receptor subfamily 2, group C, member 2                                     | Nr2c2            | 0.732  | 0.346 | 0.669  | 0.131 | 0.600  | 0.190 | 0.648  | 0.157 |
| 1389998_at   | BE113958  | Nuclear receptor subfamily 2, group F, member 2                                     | Nr2f2            | 0.954  | 0.684 | 0.992  | 0.620 | 1.206  | 0.337 | 0.981  | 0.981 |
| 1397004_at   | BF394158  | Nuclear receptor subfamily 3, group C, member 1                                     | Nr3c1            | 2.556  | 0.001 | 1.448  | 0.128 | 2.254  | 0.003 | 1.195  | 0.255 |
| 1368221_at   | NM_012576 | nuclear receptor subfamily 3, group C, member 1                                     | Nr3c1            | 1.899  | 0.200 | 0.950  | 0.639 | 2.390  | 0.002 | 1.202  | 0.165 |
| 1368476_at   | NM_013131 | nuclear receptor subfamily 3, group C, member 2                                     | Nr3c2            | 1.038  | 0.861 | 2.198  | 0.779 | 1.145  | 0.046 | 1.462  | 0.878 |
| 1369217_at   | NM_017352 | nuclear receptor subfamily 4, group A, member 3                                     | Nr4a3            | 1.176  | 0.564 | 0.753  | 0.133 | 1.364  | 0.455 | 0.817  | 0.572 |

|              |           |                                                                                                                       |                    |       |       |       |       |       |       |       |       |
|--------------|-----------|-----------------------------------------------------------------------------------------------------------------------|--------------------|-------|-------|-------|-------|-------|-------|-------|-------|
| 1393389_at   | BF396237  | Nuclear receptor subfamily 4, group A, member 3                                                                       | Nr4a3              | 1.009 | 0.990 | 0.961 | 0.909 | 1.078 | 0.836 | 0.891 | 0.854 |
| 1381895_at   | AW435074  | nuclear respiratory factor 1 (predicted)                                                                              | Nrf1_predicted     | 0.603 | 0.055 | 6.540 | 0.004 | 0.978 | 0.841 | 4.701 | 0.002 |
| 1385617_at   | BE096654  | Nuclear respiratory factor 1 (predicted)                                                                              | Nrf1_predicted     | 0.880 | 0.325 | 1.311 | 0.027 | 1.129 | 0.995 | 1.165 | 0.958 |
| 1398861_at   | AF093139  | nuclear RNA export factor 1                                                                                           | Nxf1               | 1.293 | 0.969 | 1.274 | 0.093 | 1.161 | 0.839 | 1.033 | 0.198 |
| 1382718_at   | AA900547  | Nuclear transcription factor, X-box binding 1                                                                         | Nfx1               | 1.349 | 0.034 | 2.791 | 0.003 | 1.051 | 0.263 | 2.154 | 0.000 |
| 1378637_at   | BG374464  | nuclear transcription factor, X-box binding 1                                                                         | Nfx1               | 1.316 | 0.102 | 2.483 | 0.001 | 1.101 | 0.076 | 1.898 | 0.001 |
| 1382082_at   | AI145337  | nuclear transcription factor-Y beta                                                                                   | Nfyb               | 2.036 | 0.039 | 0.507 | 0.078 | 1.821 | 0.013 | 0.530 | 0.035 |
| 1387452_a_at | NM_031553 | nuclear transcription factor-Y beta                                                                                   | Nfyb               | 1.013 | 0.999 | 0.781 | 0.449 | 0.991 | 0.947 | 0.644 | 0.354 |
| 1368820_at   | NM_012866 | nuclear transcription factor-Y gamma                                                                                  | Nfyc               | 1.107 | 0.150 | 0.976 | 0.503 | 1.109 | 0.278 | 0.880 | 0.166 |
| 1398268_at   | BI296061  | nuclear transcription factor-Y gamma                                                                                  | Nfyc               | 0.964 | 0.274 | 1.347 | 0.012 | 1.220 | 0.140 | 1.265 | 0.007 |
| 1371246_at   | BE109988  | nuclear transport factor 2                                                                                            | NTF2               | 0.751 | 0.197 | 0.795 | 0.314 | 0.847 | 0.198 | 1.038 | 0.463 |
| 1376112_a_at | AI231712  | nuclear transport factor 2                                                                                            | NTF2               | 0.569 | 0.482 | 0.346 | 0.008 | 0.656 | 0.043 | 0.429 | 0.011 |
| 1369775_at   | NM_022799 | nuclear ubiquitous casein kinase and cyclin-dependent kinase substrate                                                | Nucks              | 0.998 | 0.875 | 1.044 | 0.154 | 0.987 | 0.910 | 1.012 | 0.942 |
| 1377676_at   | AI599187  | nuclear ubiquitous casein kinase and cyclin-dependent kinase substrate                                                | Nucks              | 0.816 | 0.990 | 2.293 | 0.003 | 0.675 | 0.177 | 2.060 | 0.042 |
| 1389314_at   | AW915489  | nuclear VCP-like (predicted)                                                                                          | Nvl_predicted      | 3.599 | 0.051 | 2.410 | 0.051 | 1.126 | 0.596 | 1.382 | 0.046 |
| 1370199_at   | Z36277    | nucleobindin 1                                                                                                        | Nucb1              | 0.927 | 0.701 | 0.998 | 0.981 | 1.194 | 0.401 | 1.212 | 0.400 |
| 1370000_at   | NM_021663 | nucleobindin 2                                                                                                        | Nucb2              | 0.702 | 0.326 | 0.468 | 0.001 | 0.769 | 0.166 | 0.475 | 0.015 |
| 1368032_at   | M94288    | nucleolar and coiled-body phosphoprotein 1                                                                            | Nolc1              | 0.962 | 0.051 | 2.117 | 0.019 | 0.535 | 0.010 | 1.550 | 0.096 |
| 1368031_at   | NM_022869 | nucleolar and coiled-body phosphoprotein 1                                                                            | Nolc1              | 0.524 | 0.237 | 0.630 | 0.037 | 0.462 | 0.000 | 0.848 | 0.056 |
| 1392732_at   | AI711233  | nucleolar and spindle associated protein 1 (predicted)                                                                | Nusap1_predicted   | 0.980 | 0.900 | 0.920 | 0.911 | 0.982 | 0.912 | 0.920 | 0.716 |
| 1377760_at   | AA956374  | nucleolar complex associated 4 homolog (S. cerevisiae)                                                                | Noc4l              | 1.116 | 0.646 | 1.461 | 0.000 | 0.807 | 0.116 | 1.362 | 0.077 |
| 1383752_at   | BG375714  | nucleolar protein 1 (predicted)                                                                                       | Nol1_predicted     | 0.638 | 0.011 | 2.458 | 0.000 | 0.425 | 0.088 | 1.623 | 0.001 |
| 1380201_at   | BF412675  | nucleolar protein 10                                                                                                  | Nol10              | 0.888 | 0.028 | 0.723 | 0.110 | 0.784 | 0.025 | 1.051 | 0.217 |
| 1368544_a_at | NM_053516 | nucleolar protein 3 (apoptosis repressor with CARD domain)                                                            | Nol3               | 0.680 | 0.161 | 1.391 | 0.008 | 0.477 | 0.023 | 1.026 | 0.015 |
| 1368173_at   | NM_021754 | nucleolar protein 5                                                                                                   | Nol5               | 0.847 | 0.088 | 1.973 | 0.005 | 0.984 | 0.056 | 1.864 | 0.000 |
| 1388622_at   | AW535890  | nucleolar protein 5A                                                                                                  | Nol5a              | 0.563 | 0.036 | 1.266 | 0.030 | 0.622 | 0.032 | 1.070 | 0.026 |
| 1373445_at   | BI296198  | nucleolar protein 8 (predicted)                                                                                       | Nol8_predicted     | 1.085 | 0.648 | 1.114 | 0.240 | 1.041 | 0.435 | 1.857 | 0.022 |
| 1385009_at   | BI291860  | nucleolar protein 8 (predicted)                                                                                       | Nol8_predicted     | 0.692 | 0.846 | 1.629 | 0.037 | 1.062 | 0.168 | 1.318 | 0.525 |
| 1395642_at   | BG372596  | nucleolar protein 9                                                                                                   | Nol9               | 0.885 | 0.480 | 1.541 | 0.072 | 1.050 | 0.745 | 1.395 | 0.098 |
| 1371539_at   | AW921151  | nucleolar protein family A, member 2 (predicted)                                                                      | Nola2_predicted    | 0.678 | 0.012 | 2.358 | 0.005 | 0.474 | 0.001 | 2.081 | 0.006 |
| 1398832_at   | NM_012749 | nucleolin                                                                                                             | Ncl                | 0.650 | 0.064 | 2.420 | 0.003 | 0.675 | 0.027 | 1.894 | 0.000 |
| 1399158_a_at | J04943    | nucleophosmin 1                                                                                                       | Npm1               | 0.813 | 0.027 | 1.391 | 0.082 | 0.470 | 0.050 | 1.247 | 0.480 |
| 1398757_at   | NM_012992 | nucleophosmin 1                                                                                                       | Npm1               | 0.782 | 0.256 | 1.699 | 0.009 | 0.699 | 0.010 | 1.385 | 0.046 |
| 1398756_at   | J04943    | nucleophosmin 1 /// similar to Nucleophosmin (NPM) (Nucleolar phosphoprotein B23) (Numatrin) (Nucleolar protein NO38) | Npm1 /// LOC300303 | 0.705 | 0.269 | 2.869 | 0.005 | 0.636 | 0.001 | 2.061 | 0.013 |
| 1395212_at   | BE105805  | Nucleophosmin/nucleoplasmin 2                                                                                         | Npm2               | 0.854 | 0.069 | 0.641 | 0.010 | 0.773 | 0.043 | 0.574 | 0.007 |
| 1387151_at   | NM_053830 | nucleoporin 107                                                                                                       | Nup107             | 1.242 | 0.752 | 1.156 | 0.270 | 1.270 | 0.345 | 1.210 | 0.131 |
| 1375071_at   | BE119719  | nucleoporin 133 (predicted)                                                                                           | Nup133_predicted   | 0.492 | 0.149 | 1.159 | 0.345 | 0.541 | 0.102 | 1.194 | 0.923 |
| 1370934_at   | L06821    | nucleoporin 153                                                                                                       | Nup153             | 1.014 | 0.644 | 1.640 | 0.010 | 1.025 | 0.519 | 1.585 | 0.019 |
| 1382413_at   | AA874825  | Nucleoporin 155                                                                                                       | Nup155             | 1.002 | 0.784 | 0.699 | 0.048 | 0.806 | 0.982 | 0.634 | 0.004 |
| 1398259_at   | NM_053952 | nucleoporin 155                                                                                                       | Nup155             | 1.347 | 0.837 | 3.485 | 0.001 | 0.385 | 0.042 | 1.821 | 0.017 |
| 1382661_at   | AI230642  | nucleoporin 160 (predicted)                                                                                           | Nup160_predicted   | 1.173 | 0.291 | 1.238 | 0.268 | 0.677 | 0.071 | 0.832 | 0.947 |
| 1372021_at   | AI102685  | nucleoporin 188                                                                                                       | Nup188             | 1.002 | 0.137 | 1.002 | 0.977 | 1.001 | 1.000 | 1.003 | 0.990 |
| 1376722_at   | AI409108  | nucleoporin 205kDa (predicted)                                                                                        | Nup205_predicted   | 0.712 | 0.148 | 1.024 | 0.880 | 0.854 | 0.072 | 0.724 | 0.854 |
| 1379476_at   | AA963457  | nucleoporin 35                                                                                                        | Nup35              | 0.743 | 0.534 | 1.523 | 0.136 | 0.470 | 0.004 | 1.282 | 0.308 |
| 1386364_at   | H31217    | Nucleoporin 37 (predicted)                                                                                            | Nup37_predicted    | 1.010 | 0.152 | 0.998 | 0.990 | 1.004 | 0.705 | 1.000 | 0.179 |
| 1376703_at   | AI501977  | nucleoporin 37 (predicted)                                                                                            | Nup37_predicted    | 0.402 | 0.171 | 0.954 | 0.048 | 0.473 | 0.013 | 0.593 | 0.036 |
| 1367803_at   | NM_017361 | nucleoporin 54                                                                                                        | Nup54              | 1.770 | 0.167 | 4.232 | 0.002 | 1.485 | 0.054 | 2.745 | 0.001 |
| 1379937_at   | AW526968  | Nucleoporin 62                                                                                                        | Nup62              | 0.772 | 0.417 | 0.996 | 0.867 | 0.752 | 0.333 | 1.000 | 0.953 |
| 1370909_at   | BI286040  | nucleoporin 62                                                                                                        | Nup62              | 1.031 | 0.980 | 0.887 | 0.544 | 0.926 | 0.745 | 0.792 | 0.981 |
| 1368199_at   | NM_053616 | nucleoporin 88                                                                                                        | Nup88              | 0.732 | 0.671 | 0.697 | 0.089 | 0.626 | 0.202 | 0.657 | 0.001 |
| 1372519_at   | AI169375  | nucleoporin 93                                                                                                        | Nup93              | 1.405 | 0.268 | 1.101 | 0.534 | 1.083 | 0.421 | 0.922 | 0.189 |
| 1398901_at   | AA799609  | nucleoporin 98                                                                                                        | Nup98              | 1.254 | 0.039 | 1.598 | 0.022 | 1.240 | 0.153 | 1.383 | 0.000 |
| 1379001_at   | AA945695  | Nucleoporin 98                                                                                                        | Nup98              | 0.788 | 0.960 | 1.113 | 0.543 | 1.581 | 0.027 | 1.033 | 0.952 |
| 1388073_a_at | AF000901  | nucleoporin like 1                                                                                                    | Nupl1              | 0.629 | 0.081 | 0.934 | 0.136 | 0.700 | 0.091 | 0.999 | 0.950 |
| 1370437_at   | U63839    | nucleoporin like 1                                                                                                    | Nupl1              | 0.858 | 0.339 | 0.842 | 0.482 | 0.634 | 0.077 | 1.071 | 0.224 |
| 1388198_at   | AF000899  | nucleoporin like 1                                                                                                    | Nupl1              | 0.619 | 0.479 | 1.156 | 0.717 | 0.687 | 0.059 | 0.990 | 0.981 |
| 1370711_a_at | AF000900  | nucleoporin like 1                                                                                                    | Nupl1              | 0.998 | 0.861 | 0.995 | 0.070 | 0.975 | 0.878 | 0.753 | 0.058 |
| 1388337_at   | AI102495  | nucleoside phosphorylase (mapped)                                                                                     | Np_mapped          | 3.507 | 0.035 | 0.714 | 0.234 | 5.503 | 0.000 | 1.109 | 0.636 |
| 1370826_at   | AF062594  | nucleosome assembly protein 1-like 1                                                                                  | Nap111             | 0.874 | 0.590 | 1.001 | 0.469 | 0.669 | 0.187 | 1.088 | 0.248 |
| 1373473_a_at | BM386384  | nucleosome assembly protein 1-like 1                                                                                  | Nap111             | 0.898 | 0.820 | 1.330 | 0.012 | 0.740 | 0.177 | 1.241 | 0.021 |

|              |           |                                                                                                                          |                                  |       |       |       |       |        |       |       |       |
|--------------|-----------|--------------------------------------------------------------------------------------------------------------------------|----------------------------------|-------|-------|-------|-------|--------|-------|-------|-------|
| 1383673_at   | BI288925  | nucleosome assembly protein 1-like 2                                                                                     | Nap112                           | 0.285 | 0.001 | 0.288 | 0.002 | 0.270  | 0.016 | 0.298 | 0.013 |
| 1387407_at   | NM_133402 | nucleosome assembly protein 1-like 3                                                                                     | Nap113                           | 0.896 | 0.070 | 0.519 | 0.152 | 0.774  | 0.371 | 0.635 | 0.027 |
| 1388438_at   | AI230346  | nucleosome assembly protein 1-like 4                                                                                     | Nap114                           | 0.937 | 0.791 | 1.748 | 0.001 | 0.855  | 0.096 | 1.502 | 0.010 |
| 1373433_at   | BE108745  | nucleosome binding protein 1 (predicted) /// similar to Nucleosome binding protein 1                                     | Nsbp1_predicted ///<br>LOC501603 | 0.605 | 0.000 | 0.554 | 0.011 | 0.855  | 0.330 | 0.483 | 0.006 |
| 1371503_at   | BI289647  | nucleotide binding protein 1                                                                                             | Nubp1                            | 1.081 | 0.776 | 1.574 | 0.001 | 1.239  | 0.251 | 2.063 | 0.002 |
| 1379743_at   | BF397271  | Nucleotide binding protein 2                                                                                             | Nubp2                            | 1.688 | 0.010 | 0.994 | 0.037 | 1.246  | 0.427 | 1.145 | 0.991 |
| 1372607_at   | BM384157  | nucleotide binding protein 2                                                                                             | Nubp2                            | 0.865 | 0.614 | 0.889 | 0.367 | 0.837  | 0.077 | 1.377 | 0.291 |
| 1376288_at   | AI408455  | NudC domain containing 1 (predicted)                                                                                     | Nudcd1_predicted                 | 1.061 | 0.159 | 0.849 | 0.429 | 1.794  | 0.052 | 0.988 | 0.614 |
| 1393753_at   | BE114265  | NudC domain containing 1 (predicted)                                                                                     | Nudcd1_predicted                 | 0.831 | 0.880 | 1.750 | 0.000 | 0.919  | 0.190 | 1.729 | 0.004 |
| 1372939_at   | AI010173  | NudC domain containing 2                                                                                                 | Nudcd2                           | 0.785 | 0.291 | 1.508 | 0.023 | 1.276  | 0.663 | 1.819 | 0.008 |
| 1367761_at   | NM_133320 | nudE nuclear distribution gene E homolog like 1 (A. nidulans)                                                            | Ndel1                            | 1.022 | 0.849 | 1.693 | 0.001 | 0.917  | 0.394 | 1.509 | 0.011 |
| 1373230_at   | AI145851  | nudix (nucleoside diphosphate linked moiety X)-type motif 18                                                             | Nudt18                           | 0.940 | 0.600 | 1.626 | 0.203 | 1.037  | 0.871 | 1.497 | 0.246 |
| 1371919_at   | BF414021  | nudix (nucleoside diphosphate linked moiety X)-type motif 19                                                             | Nudt19                           | 0.492 | 0.269 | 0.768 | 0.025 | 0.475  | 0.106 | 0.860 | 0.035 |
| 1377602_at   | BF284944  | nudix (nucleoside diphosphate linked moiety X)-type motif 2                                                              | Nudt2                            | 0.858 | 0.722 | 1.165 | 0.607 | 0.837  | 0.504 | 1.255 | 0.132 |
| 1367507_at   | BI281661  | nudix (nucleoside diphosphate linked moiety X)-type motif 22                                                             | Nudt22                           | 1.140 | 0.944 | 1.445 | 0.371 | 2.519  | 0.000 | 1.259 | 0.091 |
| 1370180_at   | AA891213  | nudix (nucleoside diphosphate linked moiety X)-type motif 4                                                              | Nudt4                            | 0.736 | 0.044 | 0.489 | 0.001 | 0.674  | 0.006 | 0.859 | 0.108 |
| 1398847_at   | BG376935  | nudix (nucleoside diphosphate linked moiety X)-type motif 4                                                              | Nudt4                            | 0.357 | 0.205 | 1.132 | 0.039 | 0.607  | 0.025 | 0.999 | 0.214 |
| 1375584_at   | BG376873  | Nudix (nucleoside diphosphate linked moiety X)-type motif 5                                                              | Nudt5                            | 1.125 | 0.202 | 0.949 | 0.535 | 1.274  | 0.050 | 0.952 | 0.715 |
| 1373138_at   | AA858886  | nudix (nucleoside diphosphate linked moiety X)-type motif 5                                                              | Nudt5                            | 0.584 | 0.218 | 1.635 | 0.045 | 0.484  | 0.024 | 1.192 | 0.278 |
| 1370435_a_at | U58289    | nudix (nucleoside diphosphate linked moiety X)-type motif 6                                                              | Nudt6                            | 0.921 | 0.556 | 0.693 | 0.410 | 0.786  | 0.905 | 0.694 | 0.456 |
| 1389251_at   | AA944380  | nudix (nucleoside diphosphate linked moiety X)-type motif 7 (predicted)                                                  | Nudt7_predicted                  | 0.300 | 0.155 | 0.252 | 0.003 | 0.342  | 0.062 | 0.410 | 0.040 |
| 1373840_at   | BM384191  | nudix (nucleoside diphosphate linked moiety X)-type motif 9                                                              | Nudt9                            | 0.905 | 0.270 | 2.377 | 0.008 | 1.891  | 0.150 | 1.719 | 0.035 |
| 1383957_at   | BG376322  | nudix (nucleotide diphosphate linked moiety X)-type motif 3                                                              | Nudt3                            | 1.447 | 0.042 | 3.568 | 0.006 | 1.394  | 0.046 | 1.656 | 0.018 |
| 1372074_at   | BI276000  | nudix (nucleotide diphosphate linked moiety X)-type motif 3                                                              | Nudt3                            | 0.956 | 0.625 | 1.219 | 0.172 | 0.876  | 0.564 | 1.296 | 0.105 |
| 1375536_at   | BI287975  | Numb gene homolog (Drosophila)                                                                                           | Numb                             | 0.689 | 0.434 | 1.026 | 0.858 | 0.970  | 0.878 | 1.261 | 0.874 |
| 1382392_at   | AI045633  | Numb gene homolog (Drosophila)                                                                                           | Numb                             | 0.888 | 0.785 | 1.054 | 0.880 | 0.749  | 0.602 | 0.755 | 0.819 |
| 1385048_at   | BF398257  | Numb-like                                                                                                                | Numbl                            | 0.726 | 0.054 | 1.200 | 0.964 | 1.266  | 0.223 | 1.089 | 0.440 |
| 1368311_at   | NM_012861 | O-6-methylguanine-DNA methyltransferase                                                                                  | Mgmt                             | 0.771 | 0.750 | 4.506 | 0.003 | 0.621  | 0.040 | 3.725 | 0.003 |
| 1376813_at   | BI295955  | O-acyltransferase (membrane bound) domain containing 5                                                                   | Oact5                            | 1.279 | 0.122 | 0.789 | 0.016 | 0.828  | 0.217 | 0.816 | 0.002 |
| 1393915_at   | BE128627  | O-acyltransferase (membrane bound) domain containing 5                                                                   | Oact5                            | 0.885 | 0.694 | 0.652 | 0.042 | 0.726  | 0.405 | 0.747 | 0.139 |
| 1388612_at   | AI599462  | OCIA domain containing 1                                                                                                 | Ociad1                           | 0.643 | 0.229 | 0.878 | 0.081 | 0.615  | 0.038 | 0.887 | 0.016 |
| 1381408_at   | BI275477  | OCIA domain containing 1                                                                                                 | Ociad1                           | 1.531 | 0.978 | 0.973 | 0.618 | 1.470  | 0.307 | 0.899 | 0.376 |
| 1383283_at   | BM385645  | oculocerebrorenal syndrome of Lowe (mapped)                                                                              | Ocr1_mapped                      | 0.624 | 0.041 | 0.542 | 0.006 | 0.397  | 0.054 | 0.359 | 0.015 |
| 1391692_at   | AI229519  | Odd Oz/ten-m homolog 2 (Drosophila)                                                                                      | Odz2                             | 1.014 | 0.921 | 0.465 | 0.970 | 1.005  | 0.978 | 0.720 | 0.496 |
| 1395836_at   | BF400594  | Odd Oz/ten-m homolog 2 (Drosophila)                                                                                      | Odz2                             | 0.999 | 0.996 | 0.626 | 0.355 | 1.016  | 0.914 | 0.694 | 0.220 |
| 1387927_a_at | U03415    | olfactomedin 1                                                                                                           | Olfm1                            | 0.914 | 0.365 | 0.830 | 0.072 | 1.617  | 0.071 | 0.885 | 0.985 |
| 1369008_a_at | NM_053573 | olfactomedin 1                                                                                                           | Olfm1                            | 0.953 | 0.392 | 1.932 | 0.021 | 0.839  | 0.758 | 1.950 | 0.018 |
| 1389295_at   | AI411761  | olfactomedin-like 2B (predicted)                                                                                         | Olfml2b_predicted                | 1.031 | 0.723 | 0.848 | 0.157 | 0.831  | 0.011 | 0.968 | 0.343 |
| 1392896_at   | AI111675  | olfactory receptor 1188 (predicted)                                                                                      | Olr1188_predicted                | 0.844 | 0.831 | 1.441 | 0.083 | 0.738  | 0.467 | 1.134 | 0.982 |
| 1370735_at   | AF010293  | olfactory receptor 1278                                                                                                  | Olr1278                          | 0.999 | 0.996 | 0.949 | 0.302 | 2.250  | 0.016 | 1.031 | 0.994 |
| 1388091_at   | M64391    | olfactory receptor 1500                                                                                                  | Olr1500                          | 1.021 | 0.898 | 0.987 | 0.916 | 2.013  | 0.058 | 0.999 | 0.992 |
| 1370741_at   | AF034896  | olfactory receptor 1696                                                                                                  | Olr1696                          | 0.999 | 0.997 | 1.002 | 0.867 | 1.353  | 0.261 | 1.023 | 0.760 |
| 1394670_at   | AA859595  | oligonucleotide/oligosaccharide-binding fold containing 1                                                                | Obfc1                            | 1.332 | 0.570 | 1.182 | 0.873 | 1.033  | 0.892 | 0.999 | 0.289 |
| 1373295_at   | BI281889  | oligonucleotide/oligosaccharide-binding fold containing 1                                                                | Obfc1                            | 1.002 | 0.785 | 0.932 | 0.082 | 0.973  | 0.364 | 0.994 | 0.074 |
| 1374631_at   | AW914202  | oligonucleotide/oligosaccharide-binding fold containing 2B                                                               | Obfc2b                           | 0.875 | 0.733 | 1.197 | 0.460 | 0.879  | 0.215 | 1.128 | 0.714 |
| 1370543_at   | U76557    | O-linked N-acetylglucosamine (GlcNAc) transferase (UDP-N-acetylglucosamine:polypeptide-N-acetylglucosaminyl transferase) | Ogt                              | 0.805 | 0.077 | 0.345 | 0.000 | 1.007  | 0.964 | 0.453 | 0.001 |
| 1380360_at   | AA891814  | OMA1 homolog, zinc metallopeptidase (S. cerevisiae) (predicted)                                                          | Oma1_predicted                   | 0.574 | 0.146 | 0.760 | 0.198 | 1.128  | 0.907 | 1.131 | 0.906 |
| 1373737_at   | BG376997  | open reading frame 19                                                                                                    | ORF19                            | 1.208 | 0.125 | 1.098 | 0.164 | 1.195  | 0.881 | 0.737 | 0.772 |
| 1373717_at   | BF409265  | Opioid binding protein/cell adhesion molecule-like                                                                       | Opcml                            | 1.346 | 0.587 | 1.170 | 0.918 | 1.272  | 0.569 | 0.798 | 0.107 |
| 1369417_a_at | NM_053848 | opioid binding protein/cell adhesion molecule-like                                                                       | Opcml                            | 0.920 | 0.822 | 1.495 | 0.307 | 0.891  | 0.191 | 0.713 | 0.102 |
| 1387961_at   | M88709    | opioid binding protein/cell adhesion molecule-like                                                                       | Opcml                            | 0.594 | 0.930 | 0.925 | 0.214 | 0.723  | 0.461 | 0.854 | 0.185 |
| 1394987_at   | BE120450  | Opioid binding protein/cell adhesion molecule-like                                                                       | Opcml                            | 0.991 | 0.985 | 0.981 | 0.869 | 1.299  | 0.193 | 0.990 | 0.914 |
| 1386986_at   | NM_053340 | opioid growth factor receptor                                                                                            | Ogfr                             | 4.323 | 0.051 | 1.871 | 0.022 | 10.693 | 0.004 | 2.154 | 0.081 |
| 1386918_a_at | AF087827  | opioid receptor, sigma 1                                                                                                 | Oprs1                            | 0.628 | 0.043 | 0.690 | 0.686 | 0.645  | 0.040 | 0.858 | 0.731 |
| 1387225_at   | NM_133585 | optic atrophy 1 homolog (human)                                                                                          | Opa1                             | 1.002 | 0.924 | 1.387 | 0.011 | 1.359  | 0.010 | 1.456 | 0.004 |
| 1388432_at   | BI294994  | optineurin                                                                                                               | Optn                             | 3.127 | 0.006 | 3.119 | 0.000 | 3.025  | 0.013 | 2.948 | 0.000 |
| 1370618_at   | AB069907  | optineurin                                                                                                               | Optn                             | 2.612 | 0.014 | 6.136 | 0.003 | 2.057  | 0.084 | 6.595 | 0.012 |
| 1389141_at   | BF288111  | origin recognition complex, subunit 2-like (S. cerevisiae)                                                               | Orc2l                            | 1.084 | 0.645 | 1.501 | 0.004 | 1.052  | 0.291 | 1.734 | 0.002 |
| 1393745_at   | BE118179  | origin recognition complex, subunit 3-like (S. cerevisiae)                                                               | Orc3l                            | 0.874 | 0.394 | 1.751 | 0.006 | 0.854  | 0.032 | 1.499 | 0.036 |

|              |           |                                                                             |                   |       |       |       |       |       |       |       |       |
|--------------|-----------|-----------------------------------------------------------------------------|-------------------|-------|-------|-------|-------|-------|-------|-------|-------|
| 1395192_at   | BF392026  | origin recognition complex, subunit 3-like ( <i>S. cerevisiae</i> )         | Orc3l             | 0.844 | 0.684 | 1.427 | 0.041 | 0.857 | 0.639 | 1.376 | 0.055 |
| 1390478_at   | BE103926  | origin recognition complex, subunit 4                                       | Orc4              | 1.147 | 0.041 | 0.704 | 0.127 | 0.977 | 0.181 | 0.999 | 0.942 |
| 1391703_at   | BF414253  | origin recognition complex, subunit 4-like ( <i>S. cerevisiae</i> )         | Orc4l             | 1.360 | 0.090 | 1.949 | 0.002 | 0.889 | 0.170 | 1.868 | 0.007 |
| 1376316_at   | AI070593  | Origin recognition complex, subunit 6-like ( <i>S. cerevisiae</i> )         | Orc6l             | 0.553 | 0.054 | 0.443 | 0.007 | 0.563 | 0.023 | 0.511 | 0.017 |
| 1398439_a_at | AI070593  | origin recognition complex, subunit 6-like ( <i>S. cerevisiae</i> )         | Orc6l             | 0.637 | 0.070 | 0.184 | 0.019 | 0.535 | 0.046 | 0.163 | 0.020 |
| 1376317_at   | BI282917  | origin recognition complex, subunit 6-like ( <i>S. cerevisiae</i> )         | Orc6l             | 0.589 | 0.287 | 0.665 | 0.010 | 0.396 | 0.073 | 0.292 | 0.027 |
| 1398907_at   | BI296182  | ORM1-like 2 ( <i>S. cerevisiae</i> ) (predicted)                            | Ormdl2_predicted  | 0.422 | 0.099 | 0.473 | 0.004 | 0.497 | 0.019 | 0.457 | 0.004 |
| 1370163_at   | BF281299  | ornithine decarboxylase 1                                                   | Odc1              | 1.189 | 0.340 | 4.861 | 0.001 | 1.107 | 0.425 | 4.343 | 0.000 |
| 1372241_at   | AI411388  | ornithine decarboxylase antizyme 1                                          | Oaz1              | 0.737 | 0.166 | 0.773 | 0.095 | 0.726 | 0.052 | 0.695 | 0.110 |
| 1368731_at   | NM_053288 | orosomuroid 1                                                               | Orm1              | 1.004 | 0.861 | 6.398 | 0.005 | 1.004 | 0.884 | 1.000 | 0.981 |
| 1389117_at   | AW532161  | O-sialoglycoprotein endopeptidase                                           | Osgep             | 0.895 | 0.421 | 0.672 | 0.147 | 0.928 | 0.821 | 0.878 | 0.128 |
| 1372246_at   | BI294750  | osteoclast stimulating factor 1                                             | Ostf1             | 0.598 | 0.312 | 0.782 | 0.182 | 0.633 | 0.033 | 0.944 | 0.147 |
| 1387197_at   | NM_031817 | osteomodulin                                                                | Omd               | 1.386 | 0.418 | 1.010 | 0.063 | 1.569 | 0.075 | 1.039 | 0.080 |
| 1397207_at   | AI171260  | OTU domain containing 4                                                     | Otud4             | 1.098 | 0.050 | 3.015 | 0.001 | 0.999 | 0.804 | 1.163 | 0.134 |
| 1373231_at   | BG665102  | OTU domain containing 5                                                     | Otud5             | 1.360 | 0.042 | 0.850 | 0.440 | 1.598 | 0.083 | 0.925 | 0.369 |
| 1372958_at   | BE111986  | OTU domain, ubiquitin aldehyde binding 1 (predicted)                        | Otub1_predicted   | 0.521 | 0.779 | 0.474 | 0.254 | 0.559 | 0.055 | 0.296 | 0.174 |
| 1376118_at   | BE109604  | OTU domain, ubiquitin aldehyde binding 2 (predicted)                        | Otub2_predicted   | 0.358 | 0.016 | 0.197 | 0.007 | 0.215 | 0.013 | 0.175 | 0.009 |
| 1385154_at   | BE121382  | OTU domain, ubiquitin aldehyde binding 2 (predicted)                        | Otub2_predicted   | 1.323 | 0.706 | 1.619 | 0.019 | 1.002 | 0.980 | 1.454 | 0.993 |
| 1382263_at   | AI511280  | outer dense fiber of sperm tails 2-like (predicted)                         | Odf2l_predicted   | 0.448 | 0.066 | 0.871 | 0.498 | 1.267 | 0.284 | 0.964 | 0.238 |
| 1367869_at   | NM_057153 | oxidation resistance 1                                                      | Oxr1              | 0.391 | 0.008 | 0.203 | 0.006 | 0.641 | 0.233 | 0.366 | 0.006 |
| 1374911_at   | AW251534  | oxidative stress responsive gene                                            | RGD1303142        | 1.005 | 0.128 | 8.435 | 0.003 | 0.998 | 0.943 | 6.506 | 0.005 |
| 1380687_at   | BI295176  | Oxidative-stress responsive 1 (predicted)                                   | Oxsr1_predicted   | 1.011 | 0.263 | 0.906 | 0.937 | 0.949 | 0.891 | 1.253 | 0.344 |
| 1388909_at   | AA891742  | oxidoreductase NAD-binding domain containing 1 (predicted)                  | Oxnad1_predicted  | 0.612 | 0.246 | 0.615 | 0.009 | 0.509 | 0.003 | 0.792 | 0.060 |
| 1380220_at   | AW534345  | Oxysterol binding protein 2 (predicted)                                     | Osbp2_predicted   | 0.760 | 0.025 | 0.992 | 0.904 | 0.557 | 0.045 | 0.894 | 0.970 |
| 1375209_at   | AA893228  | Oxysterol binding protein-like 11 (predicted)                               | Osbpl11_predicted | 1.381 | 0.780 | 1.470 | 0.081 | 1.087 | 0.782 | 0.867 | 0.889 |
| 1383830_a_at | AI070135  | oxysterol binding protein-like 1A                                           | Osbpl1a           | 0.999 | 0.809 | 0.895 | 0.809 | 1.057 | 0.819 | 1.001 | 0.783 |
| 1367519_at   | BG373087  | oxysterol binding protein-like 2                                            | Osbpl2            | 0.955 | 0.620 | 1.459 | 0.079 | 0.599 | 0.026 | 1.022 | 0.843 |
| 1378814_at   | BF387902  | Oxysterol binding protein-like 2                                            | Osbpl2            | 1.083 | 0.850 | 2.097 | 0.050 | 1.280 | 0.364 | 1.722 | 0.044 |
| 1393368_at   | BG372522  | oxysterol binding protein-like 5                                            | Osbpl5            | 2.443 | 0.018 | 1.718 | 0.209 | 2.437 | 0.013 | 1.435 | 0.322 |
| 1371978_at   | AI406375  | Oxysterol binding protein-like 9 (predicted)                                | Osbpl9_predicted  | 1.149 | 0.348 | 1.743 | 0.003 | 0.893 | 0.105 | 1.876 | 0.003 |
| 1387636_a_at | NM_134395 | P11 protein                                                                 | Cdtw1             | 0.470 | 0.444 | 0.398 | 0.016 | 0.299 | 0.016 | 0.606 | 0.036 |
| 1368902_at   | NM_019210 | p21 (CDKN1A)-activated kinase 3                                             | Pak3              | 0.657 | 0.376 | 0.363 | 0.086 | 0.785 | 0.377 | 0.276 | 0.088 |
| 1378380_at   | BE098920  | P21 (CDKN1A)-activated kinase 4 (predicted)                                 | Pak4_predicted    | 1.426 | 0.074 | 2.251 | 0.016 | 1.736 | 0.107 | 1.386 | 0.078 |
| 1382781_at   | AI764741  | P21 (CDKN1A)-activated kinase 6 (predicted)                                 | Pak6_predicted    | 1.065 | 0.984 | 0.677 | 0.011 | 1.981 | 0.118 | 0.695 | 0.043 |
| 1375205_at   | Z83046    | p300/CBP-associated factor                                                  | Pcaf              | 3.516 | 0.001 | 1.420 | 0.106 | 3.053 | 0.002 | 1.271 | 0.071 |
| 1387109_at   | NM_031576 | P450 (cytochrome) oxidoreductase                                            | Por               | 0.891 | 0.621 | 1.641 | 0.022 | 0.894 | 0.201 | 1.051 | 0.533 |
| 1368213_at   | AI407454  | P450 (cytochrome) oxidoreductase                                            | Por               | 1.030 | 0.990 | 1.001 | 0.233 | 0.934 | 0.302 | 1.004 | 0.984 |
| 1372941_at   | BI273897  | p53 and DNA damage regulated 1                                              | Pdrg1             | 2.006 | 0.122 | 2.610 | 0.005 | 1.300 | 0.011 | 2.072 | 0.005 |
| 1371812_at   | BI284223  | P55                                                                         | LOC362855         | 0.895 | 0.629 | 1.148 | 0.064 | 0.862 | 0.847 | 1.113 | 0.212 |
| 1389963_at   | BI283388  | p55 protein                                                                 | LOC652956         | 1.103 | 0.055 | 1.020 | 0.847 | 1.146 | 0.240 | 0.874 | 0.856 |
| 1382758_at   | AA955094  | P7 protein                                                                  | P7                | 1.037 | 0.887 | 0.974 | 0.913 | 0.651 | 0.985 | 0.800 | 0.237 |
| 1373455_at   | BE115648  | Paf1, RNA polymerase II associated factor, homolog ( <i>S. cerevisiae</i> ) | Paf1              | 0.801 | 0.019 | 0.835 | 0.925 | 0.782 | 0.109 | 0.791 | 0.670 |
| 1395094_at   | BF549339  | Paired box gene 3                                                           | Pax3              | 1.022 | 0.943 | 1.125 | 0.433 | 1.220 | 0.455 | 1.397 | 0.172 |
| 1369242_at   | NM_013001 | paired box gene 6                                                           | Pax6              | 0.497 | 0.000 | 0.350 | 0.001 | 0.520 | 0.027 | 0.525 | 0.007 |
| 1387238_at   | NM_053869 | paired-like homeobox 2a                                                     | Phox2a            | 1.009 | 0.157 | 0.998 | 0.431 | 1.001 | 0.293 | 0.999 | 0.856 |
| 1376894_at   | AA849956  | pallidin                                                                    | Pldn              | 0.751 | 0.102 | 0.429 | 0.012 | 0.619 | 0.152 | 0.620 | 0.102 |
| 1370236_at   | AI234353  | palmitoyl-protein thioesterase 1                                            | Ppt1              | 0.665 | 0.482 | 0.384 | 0.000 | 0.603 | 0.045 | 0.419 | 0.000 |
| 1390423_at   | BE104245  | pam, highwire, rpm 1 (predicted)                                            | Phr1_predicted    | 1.899 | 0.012 | 1.471 | 0.162 | 2.427 | 0.007 | 1.611 | 0.062 |
| 1372863_at   | BF409872  | pam, highwire, rpm 1 (predicted)                                            | Phr1_predicted    | 1.794 | 0.014 | 1.665 | 0.013 | 1.978 | 0.020 | 2.314 | 0.002 |
| 1369516_at   | NM_022852 | pancreatic and duodenal homeobox gene 1                                     | Pdx1              | 1.012 | 0.965 | 0.215 | 0.011 | 0.490 | 0.001 | 0.249 | 0.029 |
| 1369196_at   | NM_012626 | pancreatic polypeptide                                                      | Ppy               | 0.959 | 0.798 | 0.228 | 0.062 | 0.812 | 0.255 | 0.264 | 0.120 |
| 1369030_at   | NM_012635 | pancreatic trypsin 1                                                        | Prss1             | 0.833 | 0.993 | 0.483 | 0.306 | 1.026 | 0.957 | 0.576 | 0.082 |
| 1368238_at   | NM_053289 | pancreatitis-associated protein                                             | Pap               | 1.177 | 0.992 | 1.095 | 0.365 | 1.001 | 0.983 | 0.918 | 0.936 |
| 1382934_at   | AI136392  | Pannexin 1                                                                  | Panx1             | 0.680 | 0.085 | 1.691 | 0.081 | 0.430 | 0.089 | 1.364 | 0.355 |
| 1382924_at   | AA850195  | pantothenate kinase 1 (predicted)                                           | Pank1_predicted   | 0.388 | 0.077 | 0.623 | 0.016 | 0.309 | 0.077 | 0.450 | 0.117 |
| 1396994_at   | BM382872  | pantothenate kinase 2 (Hallervorden-Spatz syndrome) (predicted)             | Pank2_predicted   | 1.846 | 0.100 | 0.805 | 0.480 | 2.946 | 0.013 | 1.000 | 0.887 |
| 1395209_at   | BM387740  | Pantothenate kinase 2 (Hallervorden-Spatz syndrome) (predicted)             | Pank2_predicted   | 0.963 | 0.595 | 1.110 | 0.314 | 1.168 | 0.335 | 1.226 | 0.884 |
| 1392033_a_at | AW142000  | pantothenate kinase 2 (Hallervorden-Spatz syndrome) (predicted)             | Pank2_predicted   | 1.056 | 0.782 | 1.101 | 0.628 | 1.197 | 0.073 | 1.064 | 0.137 |
| 1392831_at   | AA891438  | Pantothenate kinase 2 (Hallervorden-Spatz syndrome) (predicted)             | Pank2_predicted   | 0.979 | 0.865 | 1.335 | 0.151 | 0.694 | 0.919 | 0.770 | 0.444 |
| 1378378_at   | BI276838  | pantothenate kinase 2 (Hallervorden-Spatz syndrome) (predicted)             | Pank2_predicted   | 1.016 | 0.907 | 1.571 | 0.043 | 1.045 | 0.584 | 1.340 | 0.067 |
| 1374987_at   | AI232974  | Pantothenate kinase 3 (predicted)                                           | Pank3_predicted   | 0.528 | 0.027 | 0.550 | 0.008 | 0.584 | 0.033 | 0.722 | 0.011 |

|              |           |                                                                                                  |                                  |       |       |       |       |       |       |       |       |
|--------------|-----------|--------------------------------------------------------------------------------------------------|----------------------------------|-------|-------|-------|-------|-------|-------|-------|-------|
| 1394706_at   | AI044545  | Pantothenate kinase 3 (predicted)                                                                | Pank3_predicted                  | 0.513 | 0.150 | 1.230 | 0.293 | 0.415 | 0.014 | 1.237 | 0.193 |
| 1369938_at   | NM_133531 | pantothenate kinase 4                                                                            | Pank4                            | 1.069 | 0.840 | 1.802 | 0.078 | 0.998 | 0.971 | 1.165 | 0.186 |
| 1394136_at   | AI176017  | PAP associated domain containing 1 (predicted)                                                   | Papd1_predicted                  | 0.999 | 0.652 | 2.965 | 0.025 | 0.994 | 0.944 | 1.862 | 0.025 |
| 1373653_at   | BF550883  | PAP associated domain containing 1 (predicted)                                                   | Papd1_predicted                  | 0.613 | 0.670 | 1.260 | 0.042 | 1.116 | 0.543 | 1.853 | 0.008 |
| 1384352_at   | AI547390  | PAP associated domain containing 4                                                               | Papd4                            | 1.723 | 0.130 | 4.471 | 0.001 | 1.045 | 0.749 | 3.740 | 0.002 |
| 1374612_at   | AI170664  | PAP associated domain containing 5 (predicted)                                                   | Papd5_predicted                  | 0.841 | 0.162 | 0.876 | 0.023 | 0.874 | 0.437 | 1.098 | 0.042 |
| 1383109_at   | BG669807  | papillary renal cell carcinoma (translocation-associated) (predicted)                            | Prcc_predicted                   | 1.007 | 0.757 | 0.707 | 0.318 | 0.988 | 0.466 | 0.537 | 0.133 |
| 1390299_at   | BF405880  | Papillary renal cell carcinoma (translocation-associated) (predicted)                            | Prcc_predicted                   | 0.993 | 0.982 | 0.761 | 0.515 | 1.496 | 0.161 | 0.895 | 0.178 |
| 1395613_at   | BF408015  | Par-3 (partitioning defective 3) homolog (C. elegans)                                            | Pard3                            | 2.496 | 0.014 | 1.746 | 0.102 | 2.835 | 0.024 | 0.907 | 0.911 |
| 1379138_at   | BF391688  | Par-3 (partitioning defective 3) homolog (C. elegans)                                            | Pard3                            | 1.078 | 0.347 | 0.998 | 0.984 | 1.021 | 0.464 | 0.675 | 0.168 |
| 1381590_at   | BI295719  | Par-3 (partitioning defective 3) homolog (C. elegans)                                            | Pard3                            | 1.184 | 0.898 | 1.014 | 0.937 | 1.263 | 0.867 | 0.999 | 0.985 |
| 1383224_at   | BF525012  | par-6 (partitioning defective 6) homolog beta (C. elegans) (predicted)                           | Pard6b_predicted                 | 0.754 | 0.375 | 1.541 | 0.107 | 0.497 | 0.219 | 1.334 | 0.035 |
| 1375848_at   | BG668051  | paraoxonase 2                                                                                    | Pon2                             | 0.361 | 0.001 | 0.245 | 0.001 | 0.532 | 0.014 | 0.241 | 0.025 |
| 1384465_at   | AI136693  | paraspeckle protein 1                                                                            | Pspc1                            | 0.346 | 0.003 | 0.930 | 0.032 | 0.446 | 0.002 | 0.639 | 0.119 |
| 1386892_at   | NM_031975 | parathymosin                                                                                     | Ptms                             | 1.320 | 0.907 | 0.851 | 0.791 | 1.087 | 0.707 | 0.791 | 0.435 |
| 1368653_a_at | BI281756  | Parkinson disease (autosomal recessive, early onset) 7                                           | Park7                            | 0.620 | 0.427 | 0.684 | 0.010 | 0.507 | 0.040 | 0.638 | 0.041 |
| 1389919_at   | BI296756  | parvin, beta (predicted)                                                                         | Parvb_predicted                  | 1.000 | 1.000 | 1.000 | 0.998 | 1.001 | 0.146 | 0.997 | 0.986 |
| 1371697_at   | BI278288  | patatin-like phospholipase domain containing 2 (predicted)                                       | Pnpla2_predicted                 | 1.385 | 0.048 | 1.886 | 0.040 | 2.121 | 0.004 | 2.491 | 0.012 |
| 1390655_at   | BF420653  | paternally expressed 3 (predicted)                                                               | Peg3_predicted                   | 0.686 | 0.027 | 0.437 | 0.025 | 0.807 | 0.275 | 0.433 | 0.128 |
| 1382118_at   | BE104676  | paternally expressed 3 (predicted)                                                               | Peg3_predicted                   | 0.713 | 0.066 | 0.514 | 0.007 | 1.010 | 0.359 | 0.658 | 0.007 |
| 1376598_at   | AI179993  | PAX interacting (with transcription-activation domain) protein 1 (predicted)                     | Paxip1_predicted                 | 0.653 | 0.071 | 0.407 | 0.000 | 1.178 | 0.995 | 0.533 | 0.016 |
| 1371664_at   | BG673589  | paxillin                                                                                         | Pxn                              | 1.093 | 0.474 | 1.392 | 0.050 | 0.936 | 0.457 | 1.151 | 0.283 |
| 1373350_at   | H31668    | PC4 and SFRS1 interacting protein 1                                                              | Psip1                            | 1.240 | 0.053 | 0.661 | 0.123 | 1.037 | 0.628 | 0.809 | 0.226 |
| 1393267_at   | BI276726  | PC4 and SFRS1 interacting protein 1                                                              | Psip1                            | 1.256 | 0.054 | 1.069 | 0.560 | 1.336 | 0.048 | 1.082 | 0.494 |
| 1383588_at   | BE098610  | PC4 and SFRS1 interacting protein 1                                                              | Psip1                            | 0.558 | 0.082 | 0.852 | 0.054 | 0.543 | 0.081 | 0.908 | 0.159 |
| 1370326_at   | U36444    | PCTAIRE-motif protein kinase 1                                                                   | Pctk1                            | 1.065 | 0.752 | 0.735 | 0.006 | 1.092 | 0.464 | 0.714 | 0.017 |
| 1382345_at   | AA955299  | PCTAIRE-motif protein kinase 2                                                                   | Pctk2                            | 1.212 | 0.083 | 1.018 | 0.872 | 1.222 | 0.084 | 1.042 | 0.534 |
| 1398810_at   | NM_022595 | PDGFA associated protein 1                                                                       | Pdap1                            | 0.678 | 0.357 | 0.830 | 0.984 | 0.489 | 0.004 | 0.683 | 0.394 |
| 1369946_at   | NM_024384 | PDRP protein                                                                                     | Pdrp                             | 1.868 | 0.008 | 2.002 | 0.042 | 1.187 | 0.096 | 1.263 | 0.001 |
| 1367946_at   | NM_017365 | PDZ and LIM domain 1 (elfin)                                                                     | Pdlim1                           | 1.793 | 0.813 | 0.610 | 0.216 | 1.428 | 0.736 | 0.826 | 0.365 |
| 1372745_at   | BE112453  | PDZ and LIM domain 5                                                                             | Pdlim5                           | 0.998 | 0.897 | 2.044 | 0.024 | 1.007 | 0.983 | 1.252 | 0.376 |
| 1368703_at   | NM_053326 | PDZ and LIM domain 5                                                                             | Pdlim5                           | 0.993 | 0.935 | 1.103 | 0.162 | 1.010 | 0.858 | 1.081 | 0.344 |
| 1370347_at   | AF095585  | PDZ and LIM domain 7                                                                             | Pdlim7                           | 1.240 | 0.334 | 1.044 | 0.905 | 1.229 | 0.277 | 0.996 | 0.797 |
| 1371950_at   | AI008961  | PDZ domain containing 11 (predicted)                                                             | Pdzd11_predicted                 | 0.852 | 0.609 | 0.738 | 0.036 | 0.819 | 0.014 | 0.942 | 0.157 |
| 1379650_at   | AI231443  | PDZ domain containing 8 (predicted)                                                              | Pdzk8_predicted                  | 1.076 | 0.612 | 1.301 | 0.224 | 0.815 | 0.190 | 0.879 | 0.483 |
| 1373748_at   | AW532566  | PDZ domain containing RING finger 3 (predicted)                                                  | Pdzrn3_predicted                 | 0.129 | 0.003 | 0.060 | 0.002 | 0.050 | 0.007 | 0.050 | 0.022 |
| 1368209_at   | NM_130401 | PDZK1 interacting protein 1                                                                      | Pdzk1ip1                         | 8.833 | 0.051 | 1.319 | 0.042 | 1.234 | 0.952 | 1.069 | 1.000 |
| 1399034_at   | AI009650  | pecanex homolog (Drosophila)                                                                     | Pcnx                             | 1.828 | 0.050 | 1.480 | 0.041 | 1.983 | 0.003 | 1.625 | 0.002 |
| 1375451_at   | BE105268  | pecanex-like 3 (Drosophila)                                                                      | Pcnx13                           | 1.264 | 0.366 | 0.783 | 0.149 | 1.101 | 0.625 | 0.785 | 0.113 |
| 1372174_at   | AI009656  | PEF protein with a long N-terminal hydrophobic domain                                            | Peflin                           | 0.939 | 0.892 | 1.817 | 0.048 | 0.859 | 0.613 | 1.400 | 0.124 |
| 1390814_at   | AA848897  | pellino homolog 1 (Drosophila)                                                                   | Peli1                            | 1.945 | 0.052 | 1.273 | 0.096 | 3.446 | 0.014 | 1.112 | 0.063 |
| 1382476_x_at | AI060133  | Pellino homolog 3 (Drosophila) (predicted)                                                       | Peli3_predicted                  | 0.681 | 0.046 | 1.014 | 0.905 | 0.639 | 0.035 | 0.978 | 0.851 |
| 1371684_at   | AA799330  | pelota homolog                                                                                   | Pelo                             | 1.608 | 0.088 | 4.613 | 0.001 | 0.937 | 0.688 | 3.880 | 0.001 |
| 1376348_at   | BM386015  | pentatricopeptide repeat domain 2 (predicted)                                                    | Ptcd2_predicted                  | 0.796 | 0.663 | 1.162 | 0.591 | 0.872 | 0.390 | 0.887 | 0.218 |
| 1371008_at   | BE099971  | peptidase (mitochondrial processing) alpha                                                       | Pmpca                            | 0.366 | 0.039 | 0.928 | 0.633 | 0.430 | 0.004 | 0.856 | 0.944 |
| 1387781_at   | NM_022395 | peptidase (mitochondrial processing) beta                                                        | Pmpcb                            | 0.694 | 0.868 | 0.622 | 0.010 | 0.670 | 0.625 | 0.637 | 0.005 |
| 1398792_at   | NM_057123 | peptidase (prosome, macropain) 26S subunit, ATPase 1                                             | Psmc1                            | 0.590 | 0.241 | 0.681 | 0.003 | 0.501 | 0.045 | 0.785 | 0.068 |
| 1381035_at   | AI235476  | Peptidase (prosome, macropain) 26S subunit, ATPase 1                                             | Psmc1                            | 1.141 | 0.604 | 1.817 | 0.097 | 1.101 | 0.802 | 1.591 | 0.018 |
| 1367833_at   | NM_031149 | peptidase (prosome, macropain) 26S subunit, ATPase 5                                             | Psmc5                            | 0.531 | 0.117 | 0.985 | 0.691 | 0.423 | 0.011 | 0.889 | 0.527 |
| 1393907_at   | AA998735  | peptide YY (mapped)                                                                              | Pyy_mapped                       | 0.493 | 0.169 | 0.068 | 0.006 | 0.365 | 0.001 | 0.077 | 0.049 |
| 1367687_a_at | M25719    | peptidylglycine alpha-amidating monooxygenase                                                    | Pam                              | 0.822 | 0.009 | 0.342 | 0.000 | 0.913 | 0.033 | 0.422 | 0.004 |
| 1372517_at   | BI283851  | peptidylprolyl isomerase (cyclophilin)-like 1                                                    | Ppil1                            | 1.982 | 0.203 | 0.642 | 0.661 | 1.032 | 0.909 | 0.891 | 0.964 |
| 1375440_at   | BI283709  | peptidylprolyl isomerase (cyclophilin)-like 2                                                    | Ppil2                            | 1.168 | 0.777 | 0.639 | 0.016 | 1.334 | 0.054 | 0.930 | 0.410 |
| 1375686_at   | AI706907  | peptidylprolyl isomerase (cyclophilin)-like 3                                                    | Ppil3                            | 0.772 | 0.231 | 1.789 | 0.251 | 0.485 | 0.009 | 1.024 | 0.855 |
| 1375061_at   | BM383803  | Peptidylprolyl isomerase (cyclophilin)-like 4 (predicted)                                        | Ppil4_predicted                  | 0.743 | 0.157 | 0.540 | 0.021 | 0.727 | 0.173 | 0.982 | 0.855 |
| 1398850_at   | BG671399  | peptidylprolyl isomerase A                                                                       | Ppia                             | 0.819 | 0.763 | 0.810 | 0.030 | 0.676 | 0.215 | 0.811 | 0.024 |
| 1369934_at   | NM_022536 | peptidylprolyl isomerase B                                                                       | Ppib                             | 0.706 | 0.274 | 1.113 | 0.839 | 0.721 | 0.011 | 0.799 | 0.071 |
| 1372827_at   | AA957342  | peptidylprolyl isomerase D (cyclophilin D)                                                       | Ppid                             | 0.720 | 0.005 | 0.947 | 0.298 | 0.587 | 0.001 | 0.846 | 0.048 |
| 1380893_at   | BF416306  | peptidylprolyl isomerase D (cyclophilin D) /// similar to peptidylprolyl isomerase D (predicted) | Ppid ///<br>RGD1560149_predicted | 0.976 | 0.909 | 1.374 | 0.636 | 1.074 | 0.695 | 0.945 | 0.529 |
| 1379665_at   | AI177835  | peptidylprolyl isomerase domain and WD repeat containing 1 (predicted)                           | Ppwd1_predicted                  | 1.157 | 0.444 | 1.949 | 0.014 | 1.318 | 0.454 | 1.753 | 0.001 |



|              |           |                                                                                            |                     |       |       |       |       |        |       |       |       |
|--------------|-----------|--------------------------------------------------------------------------------------------|---------------------|-------|-------|-------|-------|--------|-------|-------|-------|
| 1389055_at   | AI104479  | peptidylprolyl isomerase E (cyclophilin E)                                                 | Ppie                | 1.048 | 0.832 | 2.379 | 0.002 | 0.982  | 0.855 | 1.294 | 0.021 |
| 1370319_at   | U68544    | peptidylprolyl isomerase F (cyclophilin F)                                                 | Ppif                | 0.853 | 0.047 | 1.173 | 0.119 | 1.107  | 0.891 | 1.323 | 0.019 |
| 1380020_at   | BF395860  | Peptidylprolyl isomerase G                                                                 | Ppig                | 0.831 | 0.572 | 0.858 | 0.547 | 1.089  | 0.348 | 0.847 | 0.077 |
| 1370096_at   | NM_017330 | perforin 1 (pore forming protein)                                                          | Prf1                | 0.996 | 0.397 | 1.243 | 0.918 | 1.532  | 0.350 | 1.020 | 0.862 |
| 1390650_at   | BI290593  | pericentrin 1                                                                              | Pcnt1               | 0.665 | 0.095 | 1.056 | 0.119 | 0.493  | 0.010 | 1.078 | 0.845 |
| 1371064_at   | U95920    | pericentriolar material 1                                                                  | Pcm1                | 0.460 | 0.265 | 0.683 | 0.329 | 0.574  | 0.029 | 0.648 | 0.016 |
| 1374956_at   | BE101520  | pericentriolar material 1                                                                  | Pcm1                | 0.961 | 0.721 | 0.858 | 0.236 | 1.338  | 0.977 | 0.848 | 0.228 |
| 1374855_at   | BI279017  | period homolog 1 (Drosophila)                                                              | Per1                | 0.796 | 0.435 | 3.662 | 0.002 | 1.223  | 0.123 | 4.019 | 0.001 |
| 1368303_at   | NM_031678 | period homolog 2 (Drosophila)                                                              | Per2                | 3.140 | 0.005 | 1.591 | 0.001 | 1.826  | 0.046 | 1.450 | 0.023 |
| 1370247_a_at | AA943163  | peripheral myelin protein 22                                                               | Pmp22               | 1.425 | 0.341 | 0.996 | 0.896 | 0.999  | 0.938 | 0.998 | 0.798 |
| 1389547_at   | BE107375  | periphilin 1 (predicted)                                                                   | Pphln1_predicted    | 1.031 | 0.892 | 0.816 | 0.658 | 1.001  | 0.979 | 0.997 | 0.919 |
| 1370833_at   | AF324454  | peroxin 2                                                                                  | Pex2                | 0.130 | 0.136 | 1.559 | 0.278 | 0.201  | 0.023 | 1.309 | 0.310 |
| 1379753_at   | BE121134  | peroxin 2                                                                                  | Pex2                | 0.894 | 0.917 | 1.561 | 0.078 | 1.276  | 0.997 | 1.946 | 0.076 |
| 1367613_at   | NM_057114 | peroxiredoxin 1                                                                            | Prdx1               | 0.788 | 0.554 | 1.044 | 0.181 | 0.712  | 0.291 | 1.022 | 0.911 |
| 1367578_at   | NM_017169 | peroxiredoxin 2                                                                            | Prdx2               | 0.849 | 0.564 | 0.756 | 0.032 | 0.852  | 0.151 | 0.859 | 0.298 |
| 1367591_at   | NM_022540 | peroxiredoxin 3                                                                            | Prdx3               | 0.508 | 0.043 | 0.634 | 0.049 | 0.619  | 0.345 | 0.609 | 0.004 |
| 1387891_at   | BI282076  | peroxiredoxin 4                                                                            | Prdx4               | 0.697 | 0.504 | 0.293 | 0.017 | 0.721  | 0.399 | 0.540 | 0.038 |
| 1367677_at   | NM_053610 | peroxiredoxin 5                                                                            | Prdx5               | 0.810 | 0.996 | 1.341 | 0.060 | 0.559  | 0.221 | 0.760 | 0.858 |
| 1367969_at   | AF014009  | peroxiredoxin 6                                                                            | Prdx6               | 0.510 | 0.418 | 2.847 | 0.064 | 0.866  | 0.564 | 1.220 | 0.512 |
| 1379361_at   | BI273703  | peroxisomal biogenesis factor 11A                                                          | Pex11a              | 1.046 | 0.750 | 1.050 | 0.136 | 1.005  | 0.995 | 0.995 | 0.756 |
| 1372923_at   | BG377340  | Peroxisomal biogenesis factor 11b                                                          | Pex11b              | 0.861 | 0.072 | 0.772 | 0.030 | 0.968  | 0.607 | 0.832 | 0.232 |
| 1369070_at   | NM_053921 | peroxisomal biogenesis factor 12                                                           | Pex12               | 0.721 | 0.442 | 0.819 | 0.366 | 0.711  | 0.183 | 1.143 | 0.532 |
| 1374638_at   | AI012951  | peroxisomal biogenesis factor 13 (predicted)                                               | Pex13_predicted     | 0.547 | 0.009 | 0.770 | 0.032 | 0.637  | 0.015 | 1.034 | 0.458 |
| 1397996_at   | BF387766  | Peroxisomal biogenesis factor 13 (predicted)                                               | Pex13_predicted     | 1.177 | 0.879 | 0.944 | 0.552 | 1.137  | 0.298 | 0.850 | 0.694 |
| 1368526_at   | NM_031350 | peroxisomal biogenesis factor 3                                                            | Pex3                | 0.918 | 0.430 | 0.593 | 0.093 | 0.771  | 0.165 | 0.668 | 0.234 |
| 1388908_at   | BI278268  | peroxisomal delta3, delta2-enoyl-Coenzyme A isomerase                                      | Peci                | 0.526 | 0.127 | 0.516 | 0.003 | 0.750  | 0.059 | 0.545 | 0.028 |
| 1372765_a_at | BM390774  | peroxisomal delta3, delta2-enoyl-Coenzyme A isomerase /// similar to RIKEN cDNA 1810022C23 | Peci /// RGD1310224 | 0.456 | 0.091 | 0.444 | 0.118 | 0.400  | 0.075 | 0.765 | 0.591 |
| 1396866_s_at | AA850928  | peroxisomal membrane protein 3                                                             | Pxmp3               | 0.802 | 0.130 | 0.972 | 0.387 | 0.640  | 0.088 | 0.910 | 0.290 |
| 1387064_at   | NM_017234 | peroxisomal membrane protein 3                                                             | Pxmp3               | 0.667 | 0.182 | 0.848 | 0.160 | 0.597  | 0.031 | 1.021 | 0.380 |
| 1383117_at   | AI232414  | peroxisomal membrane protein 4                                                             | Pxmp4               | 0.486 | 0.179 | 0.525 | 0.292 | 0.500  | 0.261 | 0.511 | 0.050 |
| 1368016_at   | NM_133299 | peroxisomal trans-2-enoyl-CoA reductase                                                    | Pecr                | 0.683 | 0.017 | 0.729 | 0.123 | 0.338  | 0.024 | 0.791 | 0.132 |
| 1388350_at   | BG377475  | peroxisome biogenesis factor 19                                                            | Pex19               | 1.179 | 0.138 | 1.495 | 0.283 | 0.727  | 0.082 | 1.265 | 0.411 |
| 1371431_at   | BI296577  | Peroxisome biogenesis factor 5 (predicted)                                                 | Pex5_predicted      | 0.723 | 0.573 | 1.378 | 0.009 | 1.045  | 0.509 | 1.322 | 0.057 |
| 1379784_at   | AA997675  | peroxisome biogenesis factor 7                                                             | Pex7                | 0.370 | 0.027 | 0.245 | 0.000 | 0.479  | 0.153 | 0.488 | 0.056 |
| 1370089_at   | NM_031347 | peroxisome proliferative activated receptor, gamma, coactivator 1 alpha                    | Ppargc1a            | 0.288 | 0.017 | 3.939 | 0.040 | 0.421  | 0.042 | 2.434 | 0.003 |
| 1392715_at   | BE113289  | peroxisome proliferative activated receptor, gamma, coactivator 1 beta                     | Ppargc1b            | 0.778 | 0.831 | 1.417 | 0.157 | 1.354  | 0.232 | 0.574 | 0.017 |
| 1379312_at   | AI706508  | peroxisome proliferative activated receptor, gamma, coactivator-related 1 (predicted)      | Pprc1_predicted     | 1.297 | 0.228 | 3.340 | 0.014 | 1.239  | 0.146 | 2.221 | 0.054 |
| 1395733_at   | AI717063  | Peroxisome proliferative activated receptor, gamma, coactivator-related 1 (predicted)      | Pprc1_predicted     | 1.040 | 0.998 | 1.239 | 0.088 | 1.031  | 0.792 | 1.033 | 0.448 |
| 1374914_at   | AI230294  | Peroxisome proliferator activated receptor delta                                           | Ppard               | 1.725 | 0.062 | 0.940 | 0.467 | 1.390  | 0.101 | 0.855 | 0.483 |
| 1372423_at   | BI286396  | PERP, TP53 apoptosis effector (predicted)                                                  | Perp_predicted      | 1.351 | 0.577 | 0.950 | 0.843 | 1.014  | 0.688 | 0.964 | 0.801 |
| 1389177_at   | AI598971  | PERP, TP53 apoptosis effector (predicted)                                                  | Perp_predicted      | 1.205 | 0.734 | 1.270 | 0.582 | 0.572  | 0.247 | 0.876 | 0.612 |
| 1382357_at   | AI713784  | PERQ amino acid rich, with GYF domain 1 (predicted)                                        | Perq1_predicted     | 1.559 | 0.043 | 0.802 | 0.266 | 1.102  | 0.057 | 0.662 | 0.086 |
| 1381469_a_at | AW526967  | PERQ amino acid rich, with GYF domain 1 (predicted)                                        | Perq1_predicted     | 1.189 | 0.301 | 1.016 | 0.854 | 1.013  | 0.822 | 1.014 | 0.244 |
| 1390241_at   | BI296888  | PERQ amino acid rich, with GYF domain 1 (predicted)                                        | Perq1_predicted     | 1.191 | 0.361 | 0.900 | 0.912 | 1.163  | 0.417 | 0.862 | 0.196 |
| 1374326_at   | AI178019  | peter pan homolog (Drosophila)                                                             | Ppan                | 0.588 | 0.009 | 2.936 | 0.004 | 0.493  | 0.066 | 1.882 | 0.017 |
| 1374747_at   | BM384279  | PFTAIRE protein kinase 1 (predicted)                                                       | Pftk1_predicted     | 0.496 | 0.071 | 0.136 | 0.004 | 0.344  | 0.014 | 0.292 | 0.002 |
| 1368262_at   | NM_021657 | PH domain and leucine rich repeat protein phosphatase                                      | Phlpp               | 0.580 | 0.472 | 3.206 | 0.000 | 0.704  | 0.193 | 2.239 | 0.003 |
| 1389201_at   | BG373545  | PHD finger protein 10                                                                      | Phf10               | 0.817 | 0.018 | 0.672 | 0.001 | 0.821  | 0.015 | 0.910 | 0.189 |
| 1376121_at   | BE107051  | PHD finger protein 10                                                                      | Phf10               | 1.152 | 0.158 | 0.653 | 0.005 | 0.538  | 0.092 | 0.524 | 0.012 |
| 1394906_at   | BF289997  | PHD finger protein 10                                                                      | Phf10               | 0.622 | 0.675 | 0.395 | 0.033 | 0.243  | 0.022 | 0.677 | 0.014 |
| 1382546_at   | AW920026  | PHD finger protein 11                                                                      | Phf11               | 1.967 | 0.181 | 1.307 | 0.172 | 21.633 | 0.000 | 8.487 | 0.017 |
| 1394014_at   | AA924840  | PHD finger protein 12                                                                      | Phf12               | 0.903 | 0.175 | 0.825 | 0.147 | 1.070  | 0.441 | 0.960 | 0.060 |
| 1374032_at   | AA998886  | PHD finger protein 12                                                                      | Phf12               | 0.986 | 0.527 | 0.683 | 0.033 | 0.665  | 0.106 | 0.924 | 0.856 |
| 1373446_at   | AI102512  | PHD finger protein 13 (predicted)                                                          | Phf13_predicted     | 1.269 | 0.255 | 2.563 | 0.010 | 0.972  | 0.917 | 1.318 | 0.460 |
| 1385671_at   | AA956689  | PHD finger protein 15 (predicted)                                                          | Phf15_predicted     | 1.379 | 0.088 | 0.552 | 0.007 | 1.377  | 0.081 | 0.747 | 0.034 |
| 1384759_at   | AW534015  | PHD finger protein 17 (predicted)                                                          | Phf17_predicted     | 1.751 | 0.351 | 2.431 | 0.049 | 0.702  | 0.503 | 1.595 | 0.079 |
| 1381246_at   | BI293437  | PHD finger protein 21B (predicted)                                                         | Phf21b_predicted    | 1.345 | 0.077 | 1.230 | 0.013 | 2.377  | 0.009 | 1.590 | 0.000 |
| 1383570_at   | BF547887  | PHD finger protein 3 (predicted)                                                           | Phf3_predicted      | 1.665 | 0.138 | 1.505 | 0.015 | 0.954  | 0.495 | 1.626 | 0.106 |
| 1371463_at   | AI233239  | PHD finger protein 5A                                                                      | Phf5a               | 0.571 | 0.493 | 1.348 | 0.470 | 0.446  | 0.073 | 1.185 | 0.507 |
| 1387034_at   | NM_012619 | phenylalanine hydroxylase                                                                  | Pah                 | 0.665 | 0.094 | 0.723 | 0.393 | 0.996  | 0.425 | 1.024 | 0.390 |
| 1390267_at   | AW915175  | phenylalanine-tRNA synthetase 2 (mitochondrial)                                            | Fars2               | 1.034 | 0.800 | 2.021 | 0.009 | 0.981  | 0.819 | 1.662 | 0.023 |

|              |           |                                                                        |                  |       |       |       |       |       |       |       |       |
|--------------|-----------|------------------------------------------------------------------------|------------------|-------|-------|-------|-------|-------|-------|-------|-------|
| 1371453_at   | BE113146  | phenylalanine-tRNA synthetase-like, beta subunit                       | Farslb           | 0.894 | 0.611 | 1.483 | 0.009 | 0.750 | 0.013 | 1.318 | 0.002 |
| 1386990_at   | NM_057137 | phenylalkylamine Ca2+ antagonist (emopamil) binding protein            | Ebp              | 0.722 | 0.594 | 0.606 | 0.074 | 0.505 | 0.213 | 0.732 | 0.053 |
| 1378143_at   | AI170625  | phosducin-like                                                         | Pdcl             | 0.991 | 0.401 | 0.830 | 0.047 | 1.564 | 0.046 | 0.958 | 0.220 |
| 1387499_a_at | NM_022247 | phosducin-like                                                         | Pdcl             | 1.002 | 0.985 | 0.914 | 0.914 | 1.011 | 0.825 | 1.014 | 0.271 |
| 1377779_at   | AI137175  | phosducin-like 3                                                       | Pdcl3            | 1.922 | 0.163 | 1.924 | 0.025 | 0.951 | 0.379 | 1.651 | 0.064 |
| 1373052_at   | BI275649  | phosducin-like 3                                                       | Pdcl3            | 1.767 | 0.213 | 3.651 | 0.005 | 1.178 | 0.016 | 2.890 | 0.007 |
| 1374153_at   | AI236359  | Phosducin-like 3                                                       | Pdcl3            | 2.494 | 0.302 | 1.775 | 0.162 | 1.459 | 0.425 | 0.785 | 0.644 |
| 1396588_at   | BF405168  | Phosphatase and actin regulator 1                                      | Phactr1          | 1.148 | 0.273 | 0.994 | 0.236 | 2.723 | 0.039 | 1.165 | 0.102 |
| 1394534_at   | AW532329  | Phosphatase and actin regulator 1                                      | Phactr1          | 1.254 | 0.627 | 0.903 | 0.994 | 1.405 | 0.874 | 1.049 | 0.655 |
| 1382303_at   | AA996943  | phosphatase and actin regulator 1                                      | Phactr1          | 1.078 | 0.695 | 0.801 | 0.124 | 1.031 | 0.899 | 0.997 | 0.124 |
| 1378172_at   | AI008119  | Phosphatase and actin regulator 2                                      | Phactr2          | 1.494 | 0.311 | 2.338 | 0.133 | 3.622 | 0.092 | 3.631 | 0.014 |
| 1392105_at   | AW527533  | Phosphatase and actin regulator 2                                      | Phactr2          | 1.365 | 0.429 | 0.498 | 0.048 | 1.960 | 0.082 | 0.715 | 0.423 |
| 1370112_at   | NM_031606 | phosphatase and tensin homolog                                         | Pten             | 1.412 | 0.333 | 2.167 | 0.012 | 1.022 | 0.437 | 1.486 | 0.063 |
| 1389299_at   | BG673255  | Phosphate cytidyltransferase 1, choline, alpha isoform                 | Pcyt1a           | 1.420 | 0.161 | 2.564 | 0.004 | 1.294 | 0.001 | 1.629 | 0.005 |
| 1368100_at   | NM_053568 | phosphate cytidyltransferase 2, ethanolamine                           | Pcyt2            | 0.875 | 0.543 | 1.220 | 0.011 | 0.793 | 0.110 | 1.111 | 0.072 |
| 1369961_at   | NM_022538 | phosphatidic acid phosphatase 2a                                       | Ppap2a           | 0.389 | 0.118 | 1.125 | 0.771 | 0.787 | 0.261 | 1.068 | 0.723 |
| 1382772_at   | BF289261  | Phosphatidic acid phosphatase 2a                                       | Ppap2a           | 1.370 | 0.602 | 1.657 | 0.128 | 2.015 | 0.152 | 0.796 | 0.705 |
| 1373083_at   | AW915681  | phosphatidic acid phosphatase type 2 domain containing 2               | Ppapdc2          | 0.843 | 0.323 | 0.456 | 0.015 | 0.701 | 0.084 | 0.753 | 0.093 |
| 1372101_at   | AI177031  | phosphatidic acid phosphatase type 2B                                  | Ppap2b           | 3.706 | 0.008 | 1.377 | 0.434 | 4.392 | 0.008 | 1.316 | 0.134 |
| 1388913_at   | AA893191  | phosphatidic acid phosphatase type 2c                                  | Ppap2c           | 0.949 | 0.182 | 1.629 | 0.146 | 1.002 | 0.994 | 1.281 | 0.373 |
| 1387058_at   | NM_017225 | phosphatidylcholine transfer protein                                   | Pctp             | 1.080 | 0.819 | 1.143 | 0.036 | 1.092 | 0.387 | 1.459 | 0.081 |
| 1373845_at   | AA944773  | Phosphatidylethanolamine binding protein 2                             | Pbp2             | 0.755 | 0.352 | 0.911 | 0.404 | 0.699 | 0.022 | 1.397 | 0.092 |
| 1386891_at   | NM_017236 | phosphatidylethanolamine binding protein 1                             | Pebp1            | 0.623 | 0.439 | 0.714 | 0.097 | 0.470 | 0.007 | 0.838 | 0.512 |
| 1393755_at   | BE109926  | phosphatidylinositol 3-kinase catalytic delta polypeptide (predicted)  | Pik3cd_predicted | 1.163 | 0.726 | 1.009 | 0.916 | 1.002 | 0.999 | 0.998 | 0.999 |
| 1369050_at   | NM_053923 | phosphatidylinositol 3-kinase, C2 domain containing, gamma polypeptide | Pik3c2g          | 3.003 | 0.018 | 2.450 | 0.046 | 5.039 | 0.018 | 4.046 | 0.023 |
| 1382366_at   | AI578786  | phosphatidylinositol 3-kinase, catalytic, alpha polypeptide            | Pik3ca           | 1.054 | 0.122 | 0.980 | 0.817 | 1.320 | 0.046 | 0.792 | 0.393 |
| 1379041_at   | BG381034  | Phosphatidylinositol 3-kinase, catalytic, alpha polypeptide            | Pik3ca           | 1.169 | 0.143 | 0.795 | 0.054 | 0.939 | 0.239 | 0.786 | 0.033 |
| 1393499_at   | AA964375  | Phosphatidylinositol 3-kinase, catalytic, alpha polypeptide            | Pik3ca           | 1.005 | 0.202 | 1.267 | 0.592 | 1.174 | 0.543 | 1.079 | 0.324 |
| 1374232_at   | BI290699  | phosphatidylinositol 3-kinase, catalytic, alpha polypeptide            | Pik3ca           | 1.179 | 0.679 | 1.634 | 0.045 | 1.317 | 0.630 | 1.120 | 0.262 |
| 1369177_at   | NM_053735 | phosphatidylinositol 4-kinase type 2 alpha                             | Pi4k2a           | 0.863 | 0.310 | 1.011 | 0.212 | 1.191 | 0.336 | 1.813 | 0.048 |
| 1370318_at   | U39572    | phosphatidylinositol 4-kinase, catalytic, alpha polypeptide            | Pik4ca           | 0.870 | 0.897 | 0.684 | 0.049 | 0.743 | 0.019 | 0.640 | 0.001 |
| 1374689_at   | AI102103  | phosphatidylinositol 4-kinase, catalytic, beta polypeptide             | Pik4cb           | 1.494 | 0.025 | 0.713 | 0.015 | 1.338 | 0.325 | 0.848 | 0.304 |
| 1384062_at   | AI072443  | Phosphatidylinositol 4-kinase, catalytic, beta polypeptide             | Pik4cb           | 0.873 | 0.492 | 0.865 | 0.085 | 0.693 | 0.185 | 0.640 | 0.007 |
| 1382414_at   | AI043787  | Phosphatidylinositol 4-kinase, catalytic, beta polypeptide             | Pik4cb           | 0.989 | 0.961 | 1.199 | 0.611 | 1.110 | 0.089 | 1.065 | 0.593 |
| 1369039_at   | NM_031083 | phosphatidylinositol 4-kinase, catalytic, beta polypeptide             | Pik4cb           | 0.698 | 0.993 | 0.283 | 0.002 | 0.941 | 0.837 | 0.318 | 0.000 |
| 1373877_at   | BF401685  | Phosphatidylinositol binding clathrin assembly protein                 | Picalm           | 1.137 | 0.062 | 1.411 | 0.010 | 1.208 | 0.481 | 1.209 | 0.032 |
| 1396561_x_at | BF409296  | phosphatidylinositol glycan, class A (mapped)                          | Piga_mapped      | 1.007 | 0.606 | 1.588 | 0.015 | 1.156 | 0.553 | 1.603 | 0.246 |
| 1373664_at   | AI228670  | phosphatidylinositol glycan, class C                                   | Pigc             | 0.692 | 0.084 | 0.753 | 0.041 | 0.614 | 0.307 | 0.580 | 0.093 |
| 1373101_at   | AI236743  | phosphatidylinositol glycan, class K                                   | Pigk             | 0.417 | 0.199 | 0.469 | 0.008 | 0.808 | 0.074 | 0.555 | 0.014 |
| 1398309_at   | D88364    | phosphatidylinositol glycan, class L                                   | Pigl             | 0.498 | 0.001 | 0.897 | 0.437 | 1.484 | 0.427 | 0.974 | 0.932 |
| 1369042_at   | NM_024144 | phosphatidylinositol glycan, class M                                   | Pigm             | 0.968 | 0.793 | 0.319 | 0.099 | 0.784 | 0.308 | 0.532 | 0.070 |
| 1382724_at   | AW433604  | Phosphatidylinositol glycan, class O (predicted)                       | Pigo_predicted   | 0.842 | 0.062 | 1.196 | 0.152 | 0.726 | 0.112 | 1.001 | 0.996 |
| 1375600_at   | AI535065  | Phosphatidylinositol glycan, class O (predicted)                       | Pigo_predicted   | 0.645 | 0.877 | 1.003 | 0.965 | 0.734 | 0.926 | 1.596 | 0.632 |
| 1396415_at   | BF387862  | Phosphatidylinositol glycan, class P (predicted)                       | Pigp_predicted   | 0.916 | 0.457 | 0.996 | 0.486 | 0.969 | 0.785 | 1.013 | 0.454 |
| 1371948_at   | BF415030  | phosphatidylinositol glycan, class P (predicted)                       | Pigp_predicted   | 0.934 | 0.725 | 0.990 | 0.484 | 0.985 | 0.707 | 1.308 | 0.076 |
| 1388793_at   | AI408261  | phosphatidylinositol glycan, class Q                                   | Pigq             | 0.406 | 0.071 | 0.252 | 0.024 | 0.530 | 0.039 | 0.250 | 0.005 |
| 1373099_at   | BI284221  | phosphatidylinositol glycan, class S                                   | Pigs             | 0.686 | 0.471 | 0.460 | 0.001 | 0.579 | 0.088 | 0.553 | 0.003 |
| 1372900_at   | BI274156  | phosphatidylinositol glycan, class T (predicted)                       | Pigt_predicted   | 0.421 | 0.001 | 0.476 | 0.005 | 0.476 | 0.004 | 0.588 | 0.019 |
| 1374571_at   | AI172192  | phosphatidylinositol glycan, class X                                   | Pigx             | 0.496 | 0.114 | 0.381 | 0.028 | 0.369 | 0.034 | 0.294 | 0.008 |
| 1398806_at   | NM_017231 | phosphatidylinositol transfer protein, alpha                           | Pitpna           | 0.570 | 0.152 | 0.796 | 0.071 | 0.494 | 0.011 | 0.754 | 0.013 |
| 1367674_at   | NM_053742 | phosphatidylinositol transfer protein, beta                            | Pitpnb           | 1.076 | 0.280 | 0.829 | 0.408 | 1.093 | 0.150 | 0.828 | 0.474 |
| 1389347_at   | BE100607  | phosphatidylinositol transfer protein, membrane-associated 1           | Pitpnm1          | 0.849 | 0.111 | 0.536 | 0.012 | 2.067 | 0.121 | 0.923 | 0.459 |
| 1379352_at   | BF406008  | phosphatidylinositol-4-phosphate 5-kinase, type 1 alpha                | Pip5k1a          | 0.380 | 0.105 | 0.766 | 0.100 | 0.302 | 0.033 | 0.631 | 0.078 |
| 1372861_at   | BG380713  | phosphatidylinositol-4-phosphate 5-kinase, type I, gamma               | Pip5k1c          | 1.083 | 0.305 | 0.796 | 0.064 | 1.128 | 0.132 | 0.767 | 0.150 |
| 1370025_at   | NM_080480 | phosphatidylinositol-4-phosphate 5-kinase, type II, gamma              | Pip5k2c          | 0.740 | 0.336 | 1.186 | 0.545 | 0.762 | 0.463 | 1.217 | 0.163 |
| 1374632_at   | AI232697  | phosphatidylserine receptor                                            | Ptdsr            | 0.590 | 0.278 | 2.645 | 0.001 | 1.011 | 0.947 | 2.131 | 0.002 |
| 1374077_at   | AI172029  | Phosphatidylserine synthase 1                                          | Ptdss1           | 0.596 | 0.064 | 0.293 | 0.020 | 0.709 | 0.790 | 0.388 | 0.017 |
| 1367497_at   | AA851302  | phosphatidylserine synthase 1                                          | Ptdss1           | 0.414 | 0.180 | 1.090 | 0.643 | 0.366 | 0.016 | 0.881 | 0.727 |
| 1372663_at   | BI289419  | phosphatidylserine synthase 2 (predicted)                              | Ptdss2_predicted | 0.805 | 0.173 | 1.026 | 0.358 | 0.805 | 0.174 | 1.010 | 0.823 |
| 1391295_at   | AI136393  | Phosphodiesterase 10A                                                  | Pde10a           | 0.237 | 0.003 | 0.588 | 0.100 | 0.154 | 0.009 | 0.560 | 0.092 |
| 1368438_at   | NM_022236 | phosphodiesterase 10A                                                  | Pde10a           | 0.419 | 0.004 | 0.439 | 0.003 | 0.456 | 0.009 | 0.384 | 0.003 |

|              |           |                                                                        |                   |       |       |       |       |       |       |       |       |
|--------------|-----------|------------------------------------------------------------------------|-------------------|-------|-------|-------|-------|-------|-------|-------|-------|
| 1370669_a_at | AB027156  | phosphodiesterase 10A                                                  | Pde10a            | 0.376 | 0.037 | 0.199 | 0.015 | 0.284 | 0.035 | 0.231 | 0.019 |
| 1388020_a_at | AF328800  | phosphodiesterase 1C                                                   | Pde1c             | 1.195 | 0.016 | 1.053 | 0.694 | 1.568 | 0.045 | 1.215 | 0.072 |
| 1371219_a_at | AF328797  | phosphodiesterase 1C                                                   | Pde1c             | 1.537 | 0.080 | 1.139 | 0.953 | 1.348 | 0.104 | 0.854 | 0.701 |
| 1394973_at   | BF410175  | Phosphodiesterase 1C                                                   | Pde1c             | 1.383 | 0.145 | 0.752 | 0.055 | 1.001 | 0.888 | 0.676 | 0.064 |
| 1369157_at   | NM_017229 | phosphodiesterase 3B                                                   | Pde3b             | 0.780 | 0.119 | 0.766 | 0.028 | 0.760 | 0.187 | 0.764 | 0.080 |
| 1394872_x_at | AI235078  | Phosphodiesterase 3B                                                   | Pde3b             | 1.031 | 0.933 | 0.988 | 0.926 | 1.137 | 0.112 | 0.985 | 0.904 |
| 1376565_at   | AI029179  | Phosphodiesterase 4A, cAMP specific                                    | Pde4a             | 0.487 | 0.187 | 0.609 | 0.162 | 0.489 | 0.192 | 0.610 | 0.121 |
| 1368670_a_at | L36467    | phosphodiesterase 4A, cAMP specific                                    | Pde4a             | 1.002 | 0.668 | 0.998 | 0.592 | 1.000 | 0.536 | 0.806 | 0.383 |
| 1378077_at   | BF412632  | Phosphodiesterase 4B, cAMP specific                                    | Pde4b             | 1.126 | 0.870 | 1.064 | 0.277 | 0.836 | 0.434 | 1.001 | 0.997 |
| 1384400_at   | BM389421  | Phosphodiesterase 4C, cAMP-specific                                    | Dpde1             | 1.529 | 0.114 | 2.067 | 0.006 | 2.751 | 0.014 | 2.618 | 0.008 |
| 1382254_at   | BI295944  | Phosphodiesterase 4D interacting protein (myomegalin)                  | Pde4dip           | 1.098 | 0.435 | 0.746 | 0.047 | 1.106 | 0.421 | 1.035 | 0.511 |
| 1379811_at   | AI763912  | Phosphodiesterase 4D interacting protein (myomegalin)                  | Pde4dip           | 0.956 | 0.855 | 0.608 | 0.005 | 1.298 | 0.331 | 0.775 | 0.017 |
| 1370569_at   | BF565001  | phosphodiesterase 4D, cAMP specific                                    | Pde4d             | 0.562 | 0.010 | 0.851 | 0.211 | 0.964 | 0.956 | 0.799 | 0.088 |
| 1393573_at   | AI575628  | phosphodiesterase 6B, cGMP, rod receptor, beta polypeptide (predicted) | Pde6b_predicted   | 1.303 | 0.792 | 1.129 | 0.642 | 1.106 | 0.619 | 1.214 | 0.979 |
| 1388512_at   | BM391512  | phosphodiesterase 6D, cGMP-specific, rod, delta (predicted)            | Pde6d_predicted   | 0.979 | 0.897 | 1.154 | 0.593 | 0.678 | 0.065 | 1.235 | 0.731 |
| 1371044_at   | BF410284  | phosphodiesterase 7A                                                   | Pde7a             | 1.637 | 0.011 | 1.575 | 0.066 | 1.205 | 0.531 | 1.504 | 0.209 |
| 1382518_at   | BM386012  | phosphodiesterase 8A                                                   | Pde8a             | 0.672 | 0.078 | 0.951 | 0.896 | 0.723 | 0.251 | 0.869 | 0.795 |
| 1392088_at   | BF399382  | Phosphodiesterase 8B                                                   | Pde8b             | 0.835 | 0.570 | 0.804 | 0.126 | 1.942 | 0.287 | 0.401 | 0.142 |
| 1374452_at   | BF399743  | phosphodiesterase 9A                                                   | Pde9a             | 2.340 | 0.125 | 1.723 | 0.047 | 2.453 | 0.013 | 1.101 | 0.500 |
| 1375213_at   | BM384604  | phosphoenolpyruvate carboxykinase 2 (mitochondrial) (predicted)        | Pck2_predicted    | 0.376 | 0.005 | 0.820 | 0.129 | 0.373 | 0.015 | 0.521 | 0.007 |
| 1391451_at   | AI228633  | Phosphoenolpyruvate carboxykinase 2 (mitochondrial) (predicted)        | Pck2_predicted    | 0.590 | 0.080 | 0.523 | 0.000 | 0.422 | 0.039 | 0.709 | 0.037 |
| 1376247_at   | BF403197  | phosphoenolpyruvate carboxykinase 2 (mitochondrial) (predicted)        | Pck2_predicted    | 0.625 | 0.164 | 1.153 | 0.100 | 0.479 | 0.074 | 0.895 | 0.596 |
| 1367743_at   | NM_013190 | phosphofructokinase, liver, B-type                                     | Pfkl              | 0.387 | 0.218 | 1.889 | 0.016 | 0.587 | 0.134 | 1.600 | 0.097 |
| 1367864_at   | NM_031715 | phosphofructokinase, muscle                                            | Pfkm              | 0.464 | 0.075 | 0.207 | 0.004 | 0.430 | 0.032 | 0.232 | 0.034 |
| 1372182_at   | BM389769  | phosphofructokinase, platelet                                          | Pfkp              | 4.975 | 0.001 | 7.762 | 0.000 | 4.954 | 0.000 | 6.087 | 0.000 |
| 1367924_at   | NM_134406 | phosphofurin acidic cluster sorting protein 1                          | Pacs1             | 0.968 | 0.352 | 1.097 | 0.094 | 0.999 | 0.984 | 1.070 | 0.479 |
| 1388634_at   | BI277505  | phosphoglucomutase 1                                                   | Pgm1              | 0.398 | 0.035 | 1.200 | 0.285 | 0.499 | 0.029 | 1.152 | 0.336 |
| 1369473_at   | NM_017033 | phosphoglucomutase 1                                                   | Pgm1              | 0.476 | 0.243 | 1.060 | 0.435 | 0.307 | 0.023 | 1.045 | 0.589 |
| 1373769_at   | AI176913  | phosphoglucomutase 1 (predicted)                                       | Pgm1_predicted    | 1.324 | 0.165 | 1.331 | 0.415 | 1.436 | 0.034 | 1.045 | 0.508 |
| 1382103_at   | AI549036  | phosphoglucomutase 3 (predicted)                                       | Pgm3_predicted    | 0.910 | 0.046 | 0.828 | 0.426 | 0.926 | 0.210 | 0.877 | 0.081 |
| 1371646_at   | AI008441  | phosphogluconate dehydrogenase (mapped)                                | Pgd_mapped        | 1.424 | 0.139 | 1.977 | 0.016 | 1.392 | 0.134 | 2.131 | 0.003 |
| 1371846_at   | BM391894  | phosphoglycerate dehydrogenase like 1                                  | Phgdhl1           | 0.505 | 0.149 | 1.441 | 0.097 | 0.390 | 0.024 | 1.435 | 0.092 |
| 1385466_at   | AI146067  | phosphoglycerate dehydrogenase like 1                                  | Phgdhl1           | 0.955 | 0.892 | 1.267 | 0.138 | 0.991 | 0.417 | 0.999 | 0.529 |
| 1388318_at   | BI279760  | phosphoglycerate kinase 1                                              | Pgk1              | 0.814 | 0.097 | 2.084 | 0.001 | 0.700 | 0.072 | 1.611 | 0.026 |
| 1387361_s_at | NM_053291 | phosphoglycerate kinase 1                                              | Pgk1              | 0.735 | 0.309 | 1.993 | 0.014 | 0.605 | 0.020 | 1.562 | 0.049 |
| 1386864_at   | NM_053290 | phosphoglycerate mutase 1                                              | Pgam1             | 0.711 | 0.214 | 1.527 | 0.006 | 0.702 | 0.040 | 1.515 | 0.005 |
| 1391577_at   | BI293450  | phosphoglycerate mutase family member 5                                | Pgam5             | 1.121 | 0.766 | 1.562 | 0.001 | 0.904 | 0.020 | 1.521 | 0.014 |
| 1378382_at   | AI230014  | Phosphoglycerate mutase family member 5                                | Pgam5             | 1.054 | 0.826 | 1.639 | 0.001 | 0.913 | 0.265 | 1.609 | 0.006 |
| 1369655_at   | NM_022958 | phosphoinositide-3-kinase, class 3                                     | Pik3c3            | 1.761 | 0.033 | 1.346 | 0.535 | 1.405 | 0.174 | 0.662 | 0.133 |
| 1389723_at   | AI172265  | phosphoinositide-3-kinase, regulatory subunit 4, p150 (predicted)      | Pik3r4_predicted  | 0.291 | 0.000 | 0.295 | 0.001 | 0.484 | 0.022 | 0.395 | 0.005 |
| 1396714_at   | BF394289  | Phospholipase A2, activating protein                                   | Plaa              | 0.663 | 0.313 | 4.654 | 0.118 | 0.633 | 0.449 | 3.619 | 0.099 |
| 1368668_at   | NM_053866 | phospholipase A2, activating protein                                   | Plaa              | 0.753 | 0.485 | 1.779 | 0.008 | 0.595 | 0.075 | 1.246 | 0.007 |
| 1370257_at   | AI234860  | phospholipase A2, group IB                                             | Pla2g1b           | 0.695 | 0.305 | 0.388 | 0.070 | 0.893 | 0.957 | 0.637 | 0.119 |
| 1368128_at   | NM_031598 | phospholipase A2, group IIA (platelets, synovial fluid)                | Pla2g2a           | 4.045 | 0.002 | 8.301 | 0.000 | 2.247 | 0.049 | 1.086 | 0.216 |
| 1377323_at   | AW434922  | phospholipase A2, group IVB (cytosolic) (predicted)                    | Pla2g4b_predicted | 1.370 | 0.158 | 2.092 | 0.058 | 1.056 | 0.906 | 1.542 | 0.190 |
| 1370385_at   | U51898    | phospholipase A2, group VI                                             | Pla2g6            | 2.176 | 0.007 | 0.937 | 0.784 | 1.877 | 0.008 | 0.937 | 0.655 |
| 1371014_at   | BE097028  | phospholipase C, beta 1                                                | Plcb1             | 0.820 | 0.102 | 0.505 | 0.006 | 0.683 | 0.203 | 0.608 | 0.010 |
| 1381133_at   | BF409213  | Phospholipase C, beta 1                                                | Plcb1             | 0.988 | 0.578 | 0.742 | 0.015 | 0.769 | 0.211 | 0.827 | 0.127 |
| 1397388_at   | AI555001  | Phospholipase C, beta 1                                                | Plcb1             | 1.002 | 0.967 | 0.870 | 0.405 | 1.004 | 0.993 | 0.764 | 0.473 |
| 1388156_at   | AW526098  | phospholipase C, beta 3                                                | Plcb3             | 0.838 | 0.902 | 0.857 | 0.398 | 0.927 | 0.920 | 1.000 | 1.000 |
| 1386962_at   | NM_024353 | phospholipase C, beta 4                                                | Plcb4             | 0.948 | 0.693 | 0.288 | 0.006 | 1.522 | 0.134 | 0.514 | 0.046 |
| 1381747_at   | BM385105  | Phospholipase C, delta 3 (predicted)                                   | Plcd3_predicted   | 0.942 | 0.363 | 1.219 | 0.506 | 1.030 | 0.994 | 1.115 | 0.594 |
| 1387065_at   | NM_080688 | phospholipase C, delta 4                                               | Plcd4             | 1.003 | 0.955 | 1.001 | 0.980 | 1.008 | 0.968 | 1.004 | 0.995 |
| 1368183_at   | NM_013187 | phospholipase C, gamma 1                                               | Plcg1             | 1.459 | 0.112 | 1.353 | 0.050 | 1.535 | 0.333 | 1.134 | 0.065 |
| 1374590_at   | BF420110  | phospholipase C-like 2 (predicted)                                     | Plcl2_predicted   | 0.542 | 0.031 | 0.746 | 0.017 | 0.537 | 0.018 | 0.770 | 0.058 |
| 1392099_at   | AI549022  | phospholipase C-like 3 (predicted)                                     | Plcl3_predicted   | 7.880 | 0.011 | 1.153 | 0.069 | 6.555 | 0.000 | 1.438 | 0.084 |
| 1371961_at   | BF287282  | phospholipase D family, member 3                                       | Pld3              | 1.098 | 0.562 | 0.805 | 0.037 | 0.878 | 0.446 | 0.759 | 0.147 |
| 1370531_a_at | U69550    | phospholipase D1                                                       | Pld1              | 2.432 | 0.007 | 3.428 | 0.004 | 2.259 | 0.002 | 2.066 | 0.027 |
| 1370530_a_at | AB000779  | phospholipase D1                                                       | Pld1              | 2.588 | 0.023 | 2.856 | 0.008 | 2.802 | 0.017 | 2.840 | 0.001 |
| 1370529_a_at | AB003171  | phospholipase D1                                                       | Pld1              | 0.981 | 0.934 | 1.838 | 0.049 | 1.402 | 0.621 | 1.002 | 0.975 |
| 1368954_at   | D88672    | phospholipase D2                                                       | Pld2              | 1.014 | 0.279 | 0.995 | 0.963 | 1.299 | 0.885 | 1.009 | 0.985 |

|              |           |                                                                                                                  |                   |       |       |        |       |        |       |       |       |
|--------------|-----------|------------------------------------------------------------------------------------------------------------------|-------------------|-------|-------|--------|-------|--------|-------|-------|-------|
| 1369029_at   | NM_057194 | phospholipid scramblase 1                                                                                        | Plscr1            | 6.280 | 0.005 | 3.217  | 0.016 | 12.282 | 0.003 | 3.218 | 0.006 |
| 1373417_at   | BI285973  | phospholipid scramblase 3                                                                                        | Plscr3            | 1.954 | 0.023 | 3.094  | 0.004 | 2.512  | 0.015 | 3.351 | 0.001 |
| 1371455_at   | AI411429  | phosphomannomutase 1                                                                                             | Pmm1              | 0.571 | 0.687 | 2.078  | 0.005 | 0.311  | 0.002 | 2.014 | 0.031 |
| 1397458_at   | AW533978  | phosphomannomutase 2 (predicted)                                                                                 | Pmm2_predicted    | 1.361 | 0.094 | 0.741  | 0.243 | 0.966  | 0.842 | 0.799 | 0.031 |
| 1371535_at   | AI411161  | phosphomannomutase 2 (predicted)                                                                                 | Pmm2_predicted    | 0.776 | 0.647 | 1.538  | 0.002 | 0.761  | 0.240 | 1.484 | 0.025 |
| 1373243_at   | BG378288  | phosphomevalonate kinase                                                                                         | Pmvk              | 0.541 | 0.143 | 1.239  | 0.551 | 0.301  | 0.029 | 0.852 | 0.084 |
| 1388756_at   | AI231606  | phosphopantothenoylcysteine synthetase                                                                           | Ppcs              | 0.431 | 0.029 | 0.716  | 0.054 | 0.293  | 0.028 | 0.748 | 0.067 |
| 1388339_at   | BE112895  | phosphoprotein enriched in astrocytes 15                                                                         | Pea15             | 1.520 | 0.269 | 2.503  | 0.013 | 0.765  | 0.894 | 1.621 | 0.048 |
| 1371441_at   | BG662875  | phosphoprotein enriched in astrocytes 15                                                                         | Pea15             | 0.993 | 0.971 | 1.221  | 0.156 | 0.693  | 0.189 | 0.760 | 0.274 |
| 1369785_at   | NM_057198 | phosphoribosyl pyrophosphate amidotransferase                                                                    | Ppat              | 1.008 | 0.147 | 0.880  | 0.082 | 0.854  | 0.152 | 0.772 | 0.134 |
| 1368165_at   | NM_017243 | phosphoribosyl pyrophosphate synthetase 1                                                                        | Prps1             | 1.245 | 0.713 | 1.274  | 0.117 | 1.388  | 0.340 | 1.377 | 0.063 |
| 1387085_at   | M29392    | phosphoribosyl pyrophosphate synthetase 1                                                                        | Prps1             | 1.273 | 0.742 | 0.961  | 0.508 | 1.371  | 0.357 | 0.869 | 0.300 |
| 1398262_at   | NM_012634 | phosphoribosyl pyrophosphate synthetase 2                                                                        | Prps2             | 0.549 | 0.062 | 0.555  | 0.200 | 0.871  | 0.064 | 0.732 | 0.185 |
| 1367750_at   | NM_022545 | phosphoribosyl pyrophosphate synthetase-associated protein 1                                                     | Prpsap1           | 0.698 | 0.032 | 0.983  | 0.240 | 0.763  | 0.096 | 0.981 | 0.050 |
| 1369978_at   | NM_057131 | phosphoribosyl pyrophosphate synthetase-associated protein 2                                                     | Prpsap2           | 0.717 | 0.019 | 0.772  | 0.036 | 0.674  | 0.022 | 0.769 | 0.155 |
| 1387790_at   | NM_080910 | phosphoribosylaminoimidazole carboxylase, phosphoribosylaminoribosylaminoimidazole succinocarboxamide synthetase | Paics             | 0.525 | 0.200 | 1.090  | 0.018 | 0.439  | 0.002 | 1.180 | 0.023 |
| 1388641_at   | AI410319  | phosphoribosylglycinamide formyltransferase                                                                      | Gart              | 0.357 | 0.016 | 1.546  | 0.187 | 0.314  | 0.006 | 0.997 | 0.959 |
| 1394839_at   | AA850773  | Phosphoribosylglycinamide formyltransferase                                                                      | Gart              | 1.113 | 0.849 | 1.393  | 0.363 | 0.841  | 0.197 | 1.071 | 0.738 |
| 1390210_at   | BF418932  | Phosphorylase kinase alpha 1                                                                                     | Phka1             | 0.624 | 0.022 | 0.531  | 0.024 | 1.004  | 0.733 | 0.807 | 0.105 |
| 1369357_at   | NM_022626 | phosphorylase kinase alpha 1                                                                                     | Phka1             | 0.842 | 0.059 | 0.999  | 0.099 | 0.840  | 0.041 | 0.998 | 0.965 |
| 1389180_at   | AI175035  | Phosphorylase kinase, beta                                                                                       | Phkb              | 0.781 | 0.050 | 0.237  | 0.078 | 0.858  | 0.513 | 0.575 | 0.077 |
| 1367788_at   | NM_080584 | phosphorylase kinase, gamma 2 (testis)                                                                           | Phkg2             | 1.015 | 0.411 | 1.173  | 0.004 | 1.230  | 0.763 | 1.152 | 0.092 |
| 1388180_at   | AI044239  | phosphorylated adaptor for RNA export                                                                            | Phax              | 0.720 | 0.269 | 1.035  | 0.710 | 0.689  | 0.004 | 0.907 | 0.065 |
| 1372665_at   | AI230228  | phosphoserine aminotransferase 1                                                                                 | Psat1             | 0.616 | 0.211 | 0.728  | 0.198 | 0.637  | 0.023 | 0.694 | 0.085 |
| 1375964_at   | BF282282  | phosphoserine phosphatase                                                                                        | Psph              | 0.491 | 0.212 | 0.809  | 0.136 | 0.296  | 0.022 | 0.698 | 0.022 |
| 1371012_at   | AJ245707  | phytanoyl-CoA 2-hydroxylase 2                                                                                    | Phyh2             | 0.180 | 0.026 | 0.278  | 0.001 | 0.273  | 0.040 | 0.399 | 0.008 |
| 1398042_at   | BF400265  | Phytanoyl-CoA dioxygenase domain containing 1                                                                    | Phyhd1            | 1.006 | 0.518 | 1.067  | 0.958 | 1.204  | 0.331 | 1.069 | 0.884 |
| 1393245_at   | AI029057  | Phytanoyl-CoA hydroxylase                                                                                        | Phyh              | 0.598 | 0.024 | 0.661  | 0.006 | 0.589  | 0.001 | 0.593 | 0.032 |
| 1387271_at   | NM_053674 | phytanoyl-CoA hydroxylase                                                                                        | Phyh              | 0.376 | 0.129 | 0.530  | 0.006 | 0.298  | 0.001 | 0.467 | 0.001 |
| 1387399_at   | NM_020098 | piccolo (presynaptic cytomatrix protein)                                                                         | Pclo              | 0.282 | 0.006 | 0.205  | 0.008 | 0.168  | 0.004 | 0.218 | 0.011 |
| 1398271_at   | AF138789  | piccolo (presynaptic cytomatrix protein)                                                                         | Pclo              | 0.259 | 0.035 | 1.143  | 0.762 | 0.250  | 0.035 | 0.901 | 0.848 |
| 1389597_at   | BI293445  | piggyBac transposable element derived 5 (predicted)                                                              | Pgbd5_predicted   | 0.815 | 0.188 | 0.633  | 0.076 | 0.803  | 0.051 | 0.565 | 0.095 |
| 1391269_at   | BG372987  | pim-2 oncogene (predicted)                                                                                       | Pim2_predicted    | 3.587 | 0.002 | 1.908  | 0.183 | 0.729  | 0.422 | 0.306 | 0.108 |
| 1377662_at   | AI176041  | pirin                                                                                                            | Pir               | 0.536 | 0.058 | 1.475  | 0.185 | 0.242  | 0.013 | 1.417 | 0.028 |
| 1378017_at   | AI408960  | pitrilysin metallopeptidase 1 (predicted)                                                                        | Pitrm1_predicted  | 0.744 | 0.692 | 1.554  | 0.021 | 0.901  | 0.158 | 1.275 | 0.002 |
| 1389903_at   | AA799616  | pituitary tumor-transforming 1 interacting protein                                                               | Pttg1ip           | 0.931 | 0.906 | 1.618  | 0.004 | 0.774  | 0.253 | 1.247 | 0.078 |
| 1388539_at   | BE113268  | plakophilin 2                                                                                                    | Pkp2              | 0.655 | 0.688 | 1.748  | 0.095 | 0.722  | 0.092 | 1.270 | 0.060 |
| 1378689_at   | BF409044  | Plakophilin 4 (predicted)                                                                                        | Pkp4_predicted    | 1.153 | 0.023 | 1.014  | 0.888 | 1.964  | 0.001 | 0.958 | 0.581 |
| 1372744_at   | BE113437  | plakophilin 4 (predicted)                                                                                        | Pkp4_predicted    | 0.832 | 0.981 | 0.787  | 0.945 | 1.000  | 0.205 | 1.167 | 0.640 |
| 1368399_a_at | NM_031640 | plasma glutamate carboxypeptidase                                                                                | Pgcp              | 0.814 | 0.388 | 0.555  | 0.005 | 1.096  | 0.629 | 0.640 | 0.013 |
| 1367800_at   | NM_013151 | plasminogen activator, tissue                                                                                    | Plat              | 3.309 | 0.002 | 21.701 | 0.008 | 1.975  | 0.115 | 7.907 | 0.020 |
| 1385981_at   | BF394800  | plasticity related gene 1                                                                                        | Prg1              | 0.441 | 0.023 | 0.305  | 0.009 | 0.180  | 0.004 | 0.290 | 0.014 |
| 1379374_at   | AW526088  | plasticity related gene 1                                                                                        | Prg1              | 0.345 | 0.024 | 0.395  | 0.000 | 0.288  | 0.000 | 0.325 | 0.008 |
| 1389654_at   | BM392070  | Plastin 1 (I isoform) (predicted)                                                                                | Pls1_predicted    | 0.793 | 0.744 | 0.546  | 0.001 | 0.766  | 0.103 | 0.530 | 0.012 |
| 1372947_at   | BG672591  | plastin 3 (T-isoform)                                                                                            | Pls3              | 0.991 | 0.384 | 1.283  | 0.059 | 1.028  | 0.691 | 1.383 | 0.011 |
| 1396071_at   | AI502944  | Plastin 3 (T-isoform)                                                                                            | Pls3              | 1.362 | 0.588 | 0.917  | 0.752 | 0.972  | 0.889 | 1.017 | 0.358 |
| 1391394_s_at | AI071374  | platelet derived growth factor receptor, beta polypeptide                                                        | Pdgfrb            | 1.077 | 0.811 | 0.999  | 0.933 | 0.816  | 0.046 | 0.998 | 0.994 |
| 1379375_at   | BE100812  | Platelet derived growth factor, alpha                                                                            | Pdgfa             | 8.595 | 0.000 | 2.479  | 0.007 | 7.316  | 0.002 | 2.018 | 0.076 |
| 1370427_at   | L06238    | platelet derived growth factor, alpha                                                                            | Pdgfa             | 6.643 | 0.004 | 3.490  | 0.000 | 6.154  | 0.003 | 2.892 | 0.016 |
| 1369963_at   | NM_053654 | platelet-activating factor acetylhydrolase, isoform 1b, alpha1 subunit                                           | Pafah1b3          | 1.026 | 0.119 | 1.592  | 0.007 | 1.384  | 0.136 | 2.264 | 0.018 |
| 1369641_at   | AF016048  | platelet-activating factor acetylhydrolase, isoform 1b, alpha2 subunit                                           | Pafah1b2          | 0.924 | 0.451 | 1.847  | 0.040 | 0.759  | 0.411 | 1.061 | 0.654 |
| 1369642_at   | BM392366  | platelet-activating factor acetylhydrolase, isoform 1b, alpha2 subunit                                           | Pafah1b2          | 0.725 | 0.780 | 1.147  | 0.283 | 0.666  | 0.129 | 0.715 | 0.068 |
| 1387807_at   | NM_031763 | platelet-activating factor acetylhydrolase, isoform 1b, alpha subunit 45kDa                                      | Pafah1b1          | 1.167 | 0.211 | 1.979  | 0.010 | 0.998  | 1.000 | 1.813 | 0.015 |
| 1392890_at   | BG663460  | platelet-activating factor acetylhydrolase, isoform 1b, alpha subunit 45kDa                                      | Pafah1b1          | 0.800 | 0.949 | 0.398  | 0.019 | 0.491  | 0.153 | 0.407 | 0.002 |
| 1383372_at   | BF407234  | platelet-activating factor receptor                                                                              | Ptafr             | 1.001 | 0.460 | 0.998  | 0.615 | 1.170  | 0.071 | 1.077 | 0.133 |
| 1374616_at   | BM384311  | platelet-derived growth factor receptor-like                                                                     | Pdgfrl            | 1.524 | 0.101 | 0.632  | 0.003 | 1.333  | 0.209 | 1.171 | 0.994 |
| 1373272_at   | AI009219  | Pleckstrin homology domain containing, family A member 5                                                         | Plekha5           | 0.456 | 0.186 | 0.755  | 0.094 | 0.851  | 0.101 | 0.895 | 0.287 |
| 1379536_at   | BF547014  | Pleckstrin homology domain containing, family A member 6 (predicted)                                             | Plekha6_predicted | 1.798 | 0.002 | 3.168  | 0.011 | 1.373  | 0.057 | 2.301 | 0.012 |
| 1370334_at   | AF081582  | pleckstrin homology domain containing, family B (evectins) member 1                                              | Plekhl1           | 1.000 | 0.998 | 0.266  | 0.001 | 1.003  | 0.884 | 0.322 | 0.027 |
| 1375631_at   | AI177176  | pleckstrin homology domain containing, family B (evectins) member 2 (predicted)                                  | Plekhl2_predicted | 1.652 | 0.090 | 1.679  | 0.005 | 1.431  | 0.021 | 1.627 | 0.002 |

|              |           |                                                                                              |                   |        |       |        |       |        |       |        |       |
|--------------|-----------|----------------------------------------------------------------------------------------------|-------------------|--------|-------|--------|-------|--------|-------|--------|-------|
| 1398327_at   | BM386598  | pleckstrin homology domain containing, family C (with FERM domain) member 1                  | Plekhc1           | 2.344  | 0.001 | 1.265  | 0.007 | 1.954  | 0.004 | 1.037  | 0.119 |
| 1384182_at   | BE128738  | pleckstrin homology domain containing, family C (with FERM domain) member 1                  | Plekhc1           | 1.094  | 0.949 | 1.140  | 0.773 | 1.001  | 0.980 | 0.998  | 0.919 |
| 1372824_at   | AI103367  | pleckstrin homology domain containing, family F (with FYVE domain) member 2 (predicted)      | Plekfh2_predicted | 1.662  | 0.065 | 2.583  | 0.004 | 1.505  | 0.061 | 2.732  | 0.000 |
| 1395020_at   | BI275435  | pleckstrin homology domain containing, family H (with MyTH4 domain) member 1 (predicted)     | Plekhh1_predicted | 2.039  | 0.021 | 2.320  | 0.008 | 1.488  | 0.029 | 1.413  | 0.182 |
| 1374215_at   | AA848429  | pleckstrin homology domain containing, family J member 1                                     | Plekhl1           | 0.583  | 0.037 | 1.015  | 0.839 | 0.768  | 0.223 | 1.073  | 0.105 |
| 1380867_a_at | BM383086  | pleckstrin homology domain containing, family M (with RUN domain) member 1                   | Plekhl1           | 3.014  | 0.006 | 1.048  | 0.784 | 2.445  | 0.013 | 1.641  | 0.010 |
| 1388609_at   | AI406723  | pleckstrin homology domain containing, family M (with RUN domain) member 2 (predicted)       | Plekhl2_predicted | 1.264  | 0.035 | 2.259  | 0.011 | 1.330  | 0.401 | 1.089  | 0.561 |
| 1377735_at   | AI176309  | Pleckstrin homology domain-containing, family A (phosphoinositide binding specific) member 3 | Plekha3           | 1.066  | 0.217 | 0.753  | 0.427 | 1.321  | 0.121 | 0.907  | 0.234 |
| 1398641_at   | AI058924  | pleckstrin homology domain-containing, family A (phosphoinositide binding specific) member 3 | Plekha3           | 1.387  | 0.782 | 0.886  | 0.976 | 1.133  | 0.745 | 1.250  | 0.279 |
| 1367727_at   | NM_053911 | pleckstrin homology, Sec7 and coiled-coil domains 2                                          | Pscd2             | 0.952  | 0.516 | 1.266  | 0.023 | 0.756  | 0.094 | 1.291  | 0.032 |
| 1368860_at   | NM_017180 | pleckstrin homology-like domain, family A, member 1                                          | Phlda1            | 1.528  | 0.056 | 1.229  | 0.044 | 0.999  | 0.992 | 0.445  | 0.844 |
| 1378106_at   | AI029402  | pleckstrin homology-like domain, family A, member 2 (predicted)                              | Phlda2_predicted  | 3.784  | 0.011 | 2.244  | 0.206 | 1.019  | 1.000 | 0.996  | 0.896 |
| 1375224_at   | AW520812  | pleckstrin homology-like domain, family A, member 3                                          | Phlda3            | 1.002  | 0.744 | 5.182  | 0.014 | 0.999  | 0.864 | 3.289  | 0.039 |
| 1386941_at   | NM_022401 | plectin 1                                                                                    | Plec1             | 0.988  | 0.391 | 0.988  | 0.699 | 0.997  | 0.725 | 1.038  | 0.800 |
| 1387122_at   | NM_012760 | pleiomorphic adenoma gene-like 1                                                             | Plagl1            | 0.221  | 0.047 | 0.291  | 0.004 | 0.258  | 0.000 | 0.270  | 0.002 |
| 1369968_at   | NM_017066 | pleiotrophin                                                                                 | Ptn               | 1.196  | 0.741 | 0.827  | 0.037 | 1.476  | 0.775 | 0.902  | 0.136 |
| 1387823_at   | NM_021757 | pleiotropic regulator 1, PRL1 homolog (Arabidopsis)                                          | Plrg1             | 0.678  | 0.865 | 1.150  | 0.019 | 0.578  | 0.034 | 1.045  | 0.667 |
| 1376139_at   | BI295513  | Plexin A3 (mapped)                                                                           | Plxna3_mapped     | 0.891  | 0.177 | 1.037  | 0.749 | 0.930  | 0.362 | 0.819  | 0.040 |
| 1374444_at   | BI288540  | Plexin B1 (predicted)                                                                        | Plxnb1_predicted  | 0.757  | 0.299 | 0.994  | 0.294 | 1.288  | 0.872 | 0.862  | 0.452 |
| 1371411_at   | BG380275  | plexin B2                                                                                    | Plxnb2            | 1.322  | 0.322 | 1.137  | 0.244 | 1.569  | 0.214 | 0.995  | 0.238 |
| 1387929_at   | AB020504  | PMF32 protein                                                                                | Pmf31             | 1.038  | 0.933 | 0.584  | 0.163 | 0.908  | 0.656 | 0.656  | 0.084 |
| 1386913_at   | NM_019358 | podoplanin                                                                                   | Pdpm              | 0.941  | 0.471 | 1.981  | 0.005 | 0.673  | 0.413 | 0.851  | 0.515 |
| 1384349_at   | AI577326  | pogo transposable element with ZNF domain (predicted)                                        | Pogz_predicted    | 1.040  | 0.211 | 1.028  | 0.964 | 1.027  | 0.958 | 0.934  | 0.948 |
| 1393594_at   | AI030196  | Pogo transposable element with ZNF domain (predicted)                                        | Pogz_predicted    | 1.805  | 0.222 | 0.706  | 0.041 | 1.340  | 0.041 | 0.858  | 0.088 |
| 1370177_at   | AI548856  | poliovirus receptor                                                                          | PVR               | 14.720 | 0.001 | 12.733 | 0.010 | 19.862 | 0.000 | 13.030 | 0.007 |
| 1398745_at   | BM389610  | Poliovirus receptor-related 1                                                                | Pvrl1             | 0.996  | 0.944 | 0.890  | 0.620 | 0.991  | 0.980 | 0.893  | 0.053 |
| 1380849_at   | BI274299  | Poliovirus receptor-related 1                                                                | Pvrl1             | 0.992  | 0.968 | 1.002  | 0.755 | 1.028  | 0.878 | 1.027  | 0.987 |
| 1389681_at   | BI296388  | Poliovirus receptor-related 2 (herpesvirus entry mediator B)                                 | Pvrl2             | 2.599  | 0.048 | 1.459  | 0.128 | 1.818  | 0.025 | 1.575  | 0.087 |
| 1375216_at   | AA850909  | poliovirus receptor-related 2 (herpesvirus entry mediator B)                                 | Pvrl2             | 2.868  | 0.056 | 0.648  | 0.038 | 4.696  | 0.005 | 0.664  | 0.546 |
| 1389899_at   | BE102426  | Poliovirus receptor-related 2 (herpesvirus entry mediator B)                                 | Pvrl2             | 0.540  | 0.678 | 0.843  | 0.758 | 1.440  | 0.090 | 1.185  | 0.590 |
| 1378027_at   | AW525315  | poliovirus receptor-related 3 (predicted)                                                    | Pvrl3_predicted   | 0.709  | 0.358 | 1.581  | 0.063 | 0.802  | 0.142 | 1.812  | 0.013 |
| 1397363_at   | AI103913  | poliovirus receptor-related 3 (predicted)                                                    | Pvrl3_predicted   | 0.652  | 0.512 | 1.226  | 0.163 | 0.644  | 0.182 | 1.726  | 0.200 |
| 1368106_at   | NM_031821 | polo-like kinase 2 (Drosophila)                                                              | Plk2              | 1.318  | 0.016 | 1.461  | 0.019 | 1.705  | 0.004 | 1.674  | 0.003 |
| 1373080_at   | BI284422  | poly (A) polymerase alpha (predicted)                                                        | Papola_predicted  | 0.669  | 0.334 | 0.737  | 0.040 | 0.670  | 0.331 | 0.835  | 0.129 |
| 1393546_at   | BF394642  | Poly (A) polymerase alpha (predicted)                                                        | Papola_predicted  | 0.875  | 0.453 | 0.948  | 0.704 | 0.600  | 0.031 | 1.291  | 0.661 |
| 1384573_at   | BE108853  | poly (A) polymerase alpha (predicted)                                                        | Papola_predicted  | 0.741  | 0.502 | 0.971  | 0.472 | 0.747  | 0.359 | 1.031  | 0.074 |
| 1370354_at   | AB019366  | poly (ADP-ribose) glycohydrolase                                                             | Parg              | 0.817  | 0.063 | 0.800  | 0.010 | 0.770  | 0.007 | 0.806  | 0.365 |
| 1369969_at   | NM_013063 | poly (ADP-ribose) polymerase family, member 1                                                | Parp1             | 1.512  | 0.556 | 0.726  | 0.322 | 1.347  | 0.062 | 0.944  | 0.924 |
| 1380071_at   | BI285978  | Poly (ADP-ribose) polymerase family, member 12 (predicted)                                   | Parp12_predicted  | 7.040  | 0.007 | 2.887  | 0.000 | 8.872  | 0.001 | 4.962  | 0.001 |
| 1374693_at   | BM388613  | poly (ADP-ribose) polymerase family, member 16                                               | Parp16            | 1.698  | 0.152 | 1.242  | 0.225 | 1.002  | 0.992 | 1.422  | 0.323 |
| 1383251_at   | AW524533  | poly (ADP-ribose) polymerase family, member 2 (predicted)                                    | Parp2_predicted   | 0.988  | 0.781 | 1.224  | 0.005 | 0.773  | 0.697 | 1.401  | 0.004 |
| 1376144_at   | AA819679  | poly (ADP-ribose) polymerase family, member 9 (predicted)                                    | Parp9_predicted   | 27.680 | 0.000 | 15.173 | 0.000 | 48.249 | 0.000 | 22.399 | 0.000 |
| 1371777_at   | BM383696  | poly A binding protein, cytoplasmic 4                                                        | Pabpc4            | 1.153  | 0.049 | 1.739  | 0.001 | 1.130  | 0.137 | 1.876  | 0.002 |
| 1369952_at   | NM_134353 | poly(A) binding protein, cytoplasmic 1                                                       | Pabpc1            | 1.055  | 0.175 | 1.261  | 0.047 | 1.135  | 0.538 | 1.225  | 0.964 |
| 1382922_at   | BG375109  | Poly(A) binding protein, nuclear 1                                                           | Pabpn1            | 0.488  | 0.005 | 0.451  | 0.004 | 0.537  | 0.006 | 0.493  | 0.148 |
| 1392480_at   | BE100901  | poly(A) binding protein, nuclear 1                                                           | Pabpn1            | 0.519  | 0.049 | 0.795  | 0.170 | 0.634  | 0.231 | 1.021  | 0.935 |
| 1379481_at   | AW525563  | poly(A) binding protein, nuclear 1                                                           | Pabpn1            | 0.410  | 0.051 | 0.509  | 0.059 | 0.525  | 0.164 | 0.675  | 0.013 |
| 1371958_at   | BM392148  | poly(A) binding protein, nuclear 1                                                           | Pabpn1            | 1.030  | 0.924 | 0.291  | 0.000 | 1.733  | 0.382 | 0.238  | 0.002 |
| 1380101_at   | BE109349  | poly(A) polymerase gamma (predicted)                                                         | Papolg_predicted  | 1.072  | 0.885 | 0.691  | 0.031 | 2.003  | 0.013 | 1.006  | 0.932 |
| 1391685_at   | AW521201  | poly(A)-specific ribonuclease (PARN)-like domain containing 1                                | Pnlhc1            | 0.996  | 0.294 | 0.999  | 0.509 | 1.021  | 0.871 | 0.998  | 0.487 |
| 1395792_at   | AI549034  | Poly(rC) binding protein 2                                                                   | Pcbp2             | 1.039  | 0.235 | 1.589  | 0.202 | 0.970  | 0.788 | 1.066  | 0.493 |
| 1398941_at   | AI170413  | poly(rC) binding protein 2                                                                   | Pcbp2             | 1.058  | 0.742 | 1.077  | 0.333 | 1.013  | 0.398 | 0.869  | 0.139 |
| 1383274_at   | AA956005  | poly(rC) binding protein 3                                                                   | Pcbp3             | 1.207  | 0.372 | 1.136  | 0.665 | 1.220  | 0.250 | 1.553  | 0.259 |
| 1383273_a_at | AA956005  | poly(rC) binding protein 3                                                                   | Pcbp3             | 1.112  | 0.788 | 1.205  | 0.383 | 0.839  | 0.394 | 1.741  | 0.182 |
| 1371915_at   | AW523679  | poly(rC) binding protein 4 (predicted)                                                       | Pcbp4_predicted   | 1.187  | 0.796 | 1.010  | 0.902 | 1.313  | 0.968 | 1.017  | 0.866 |
| 1372212_at   | BI285445  | polyamine oxidase (predicted)                                                                | Paox_predicted    | 0.541  | 0.349 | 0.946  | 0.813 | 0.572  | 0.188 | 1.183  | 0.645 |
| 1372335_at   | BE114641  | Polycomb group ring finger 1                                                                 | Pcgf1             | 0.913  | 0.276 | 0.958  | 0.888 | 0.998  | 0.347 | 0.957  | 0.998 |
| 1390352_at   | AA926371  | polycomb group ring finger 1                                                                 | Pcgf1             | 1.023  | 0.535 | 0.982  | 0.790 | 1.088  | 0.992 | 0.899  | 0.168 |
| 1392892_at   | AA955814  | polycomb group ring finger 2 (predicted)                                                     | Pcgf2_predicted   | 0.705  | 0.987 | 1.736  | 0.138 | 0.999  | 0.993 | 0.950  | 0.558 |
| 1389760_at   | AA858786  | polycomb group ring finger 6                                                                 | Pcgf6             | 0.708  | 0.091 | 1.212  | 0.275 | 0.751  | 0.126 | 1.645  | 0.074 |
| 1371029_at   | AW916437  | polycystic kidney disease 1 homolog                                                          | Pkd1              | 1.042  | 0.793 | 1.035  | 0.285 | 1.032  | 0.971 | 0.840  | 0.308 |

|              |           |                                                                                            |                     |       |       |       |       |       |       |       |       |
|--------------|-----------|--------------------------------------------------------------------------------------------|---------------------|-------|-------|-------|-------|-------|-------|-------|-------|
| 1372797_at   | BM383862  | polyglutamine binding protein 1                                                            | Pqbp1               | 0.442 | 0.078 | 0.423 | 0.056 | 0.588 | 0.025 | 0.476 | 0.023 |
| 1371800_at   | AI230538  | polyhomeotic-like 2 (Drosophila)                                                           | Phc2                | 2.422 | 0.062 | 0.991 | 0.188 | 4.086 | 0.003 | 1.718 | 0.147 |
| 1393674_at   | BF396736  | Polyhomeotic-like 2 (Drosophila)                                                           | Phc2                | 1.240 | 0.184 | 0.672 | 0.109 | 1.798 | 0.032 | 0.793 | 0.196 |
| 1371987_at   | BI274697  | polymerase (DNA directed) sigma (predicted)                                                | Polσ_predicted      | 1.010 | 0.752 | 0.756 | 0.281 | 1.935 | 0.109 | 0.745 | 0.231 |
| 1387142_at   | NM_017141 | polymerase (DNA directed), beta                                                            | Polβ                | 1.025 | 0.283 | 0.925 | 0.961 | 0.875 | 0.321 | 1.068 | 0.355 |
| 1373935_at   | AI102751  | polymerase (DNA directed), delta 2, regulatory subunit                                     | Polδ2               | 0.711 | 0.021 | 2.091 | 0.096 | 0.898 | 0.129 | 1.774 | 0.065 |
| 1370045_at   | NM_053528 | polymerase (DNA directed), gamma                                                           | Polγ                | 0.796 | 0.006 | 1.472 | 0.019 | 0.726 | 0.102 | 1.163 | 0.134 |
| 1375504_at   | BM390747  | Polymerase (DNA directed), gamma 2, accessory subunit (predicted)                          | Polγ2_predicted     | 0.600 | 0.127 | 0.947 | 0.972 | 0.970 | 0.893 | 1.188 | 0.675 |
| 1384265_at   | BI278347  | polymerase (DNA-directed), delta 3, accessory subunit                                      | Polδ3               | 1.734 | 0.054 | 5.134 | 0.008 | 1.531 | 0.005 | 3.952 | 0.013 |
| 1388883_at   | BF281976  | polymerase (DNA-directed), delta 4                                                         | Polδ4               | 0.500 | 0.130 | 0.184 | 0.003 | 0.327 | 0.003 | 0.235 | 0.013 |
| 1371920_at   | AA851255  | polymerase (DNA-directed), delta interacting protein 2 (predicted)                         | Polδip2_predicted   | 0.449 | 0.057 | 0.489 | 0.008 | 0.543 | 0.002 | 0.603 | 0.010 |
| 1383037_at   | AI232159  | polymerase (DNA-directed), delta interacting protein 2 (predicted)                         | Polδip2_predicted   | 1.000 | 1.000 | 0.779 | 0.314 | 0.887 | 0.420 | 0.858 | 0.131 |
| 1388367_at   | AI178241  | polymerase (DNA-directed), epsilon 4 (p12 subunit) (predicted)                             | Pole4_predicted     | 0.855 | 0.046 | 1.428 | 0.064 | 0.808 | 0.239 | 1.473 | 0.041 |
| 1376001_at   | BG380440  | polymerase (RNA) I associated factor 1 (predicted)                                         | Praf1_predicted     | 0.629 | 0.012 | 2.062 | 0.014 | 0.794 | 0.328 | 1.635 | 0.040 |
| 1388808_at   | AW531224  | polymerase (RNA) II (DNA directed) polypeptide A (mapped)                                  | Polr2a_mapped       | 0.554 | 0.082 | 0.744 | 0.139 | 0.823 | 0.458 | 1.077 | 0.219 |
| 1382976_at   | BM387928  | Polymerase (RNA) II (DNA directed) polypeptide A (mapped)                                  | Polr2a_mapped       | 0.639 | 0.826 | 1.161 | 0.443 | 0.912 | 0.670 | 1.534 | 0.134 |
| 1372083_at   | BI289658  | polymerase (RNA) II (DNA directed) polypeptide B (predicted)                               | Polr2b_predicted    | 0.634 | 0.489 | 0.729 | 0.012 | 0.950 | 0.234 | 0.813 | 0.109 |
| 1398899_at   | AI170414  | polymerase (RNA) II (DNA directed) polypeptide C                                           | Polr2c              | 1.035 | 0.220 | 1.182 | 0.113 | 0.814 | 0.269 | 1.364 | 0.037 |
| 1379832_at   | BF544977  | polymerase (RNA) II (DNA directed) polypeptide D (predicted)                               | Polr2d_predicted    | 0.624 | 0.157 | 0.878 | 0.049 | 0.751 | 0.137 | 0.847 | 0.078 |
| 1367471_at   | BI279090  | polymerase (RNA) II (DNA directed) polypeptide E (predicted)                               | Polr2e_predicted    | 0.605 | 0.625 | 1.493 | 0.114 | 0.501 | 0.009 | 1.296 | 0.180 |
| 1391699_at   | AI556892  | polymerase (RNA) II (DNA directed) polypeptide F                                           | Polr2f              | 0.665 | 0.141 | 1.009 | 0.975 | 0.773 | 0.106 | 1.027 | 0.916 |
| 1369996_at   | NM_031335 | polymerase (RNA) II (DNA directed) polypeptide F                                           | Polr2f              | 0.823 | 0.850 | 1.691 | 0.662 | 0.422 | 0.079 | 1.118 | 0.555 |
| 1367769_at   | NM_053948 | polymerase (RNA) II (DNA directed) polypeptide G                                           | Polr2g              | 0.561 | 0.029 | 0.792 | 0.085 | 0.338 | 0.003 | 0.746 | 0.222 |
| 1373668_at   | BG373075  | polymerase (RNA) II (DNA directed) polypeptide I (predicted)                               | Polr2i_predicted    | 0.952 | 0.906 | 1.568 | 0.090 | 0.708 | 0.327 | 1.334 | 0.144 |
| 1398914_at   | AW530341  | polymerase (RNA) II (DNA directed) polypeptide J (predicted)                               | Polr2j_predicted    | 0.430 | 0.178 | 0.868 | 0.633 | 0.435 | 0.013 | 0.785 | 0.508 |
| 1380256_at   | BE103946  | polymerase (RNA) III (DNA directed) polypeptide C                                          | Polr3c              | 1.827 | 0.044 | 1.234 | 0.114 | 2.203 | 0.012 | 2.045 | 0.005 |
| 1371822_at   | BI275831  | polymerase (RNA) III (DNA directed) polypeptide D                                          | Polr3d              | 0.545 | 0.676 | 1.198 | 0.076 | 0.702 | 0.081 | 1.139 | 0.428 |
| 1374415_at   | BF416982  | polymerase (RNA) III (DNA directed) polypeptide E (predicted)                              | Polr3e_predicted    | 0.950 | 0.989 | 1.459 | 0.048 | 0.511 | 0.027 | 0.796 | 0.412 |
| 1399035_at   | BE097233  | polymerase (RNA) III (DNA directed) polypeptide H (predicted)                              | Polr3h_predicted    | 0.701 | 0.024 | 0.610 | 0.021 | 0.392 | 0.007 | 0.579 | 0.007 |
| 1374295_at   | AI233096  | polymerase (RNA) mitochondrial (DNA directed) (predicted)                                  | Polrmt_predicted    | 0.972 | 0.995 | 1.880 | 0.185 | 0.999 | 0.928 | 0.992 | 0.691 |
| 1371099_at   | U07886    | Polymeric immunoglobulin receptor AATTAA-containing 3'UTR Group 1 mRNA sequence            | ---                 | 2.542 | 0.841 | 5.273 | 0.034 | 0.999 | 0.514 | 0.892 | 0.307 |
| 1393367_at   | AW520745  | polynucleotide kinase 3'-phosphatase                                                       | Pnkp                | 0.595 | 0.217 | 1.090 | 0.067 | 0.471 | 0.053 | 1.386 | 0.115 |
| 1367931_a_at | X60790    | polypyrimidine tract binding protein 1                                                     | Ptbp1               | 0.665 | 0.115 | 0.832 | 0.762 | 0.604 | 0.000 | 0.731 | 0.038 |
| 1378038_at   | BF393884  | Polypyrimidine tract binding protein 2                                                     | Ptbp2               | 1.577 | 0.000 | 2.806 | 0.012 | 1.284 | 0.002 | 2.326 | 0.034 |
| 1375844_at   | AI406370  | polypyrimidine tract binding protein 2                                                     | Ptbp2               | 1.226 | 0.005 | 1.318 | 0.019 | 1.398 | 0.111 | 1.163 | 0.018 |
| 1373913_at   | BF282271  | polyribonucleotide nucleotidyltransferase 1                                                | Pnpt1               | 1.178 | 0.208 | 0.997 | 0.983 | 1.820 | 0.019 | 1.435 | 0.101 |
| 1380587_at   | BF404982  | Polyribonucleotide nucleotidyltransferase 1                                                | Pnpt1               | 1.002 | 0.979 | 0.898 | 0.184 | 0.985 | 0.883 | 0.876 | 0.096 |
| 1370274_at   | D16554    | polyubiquitin                                                                              | Ubb                 | 0.876 | 0.959 | 1.080 | 0.041 | 0.793 | 0.248 | 1.014 | 0.655 |
| 1386852_x_at | D16554    | polyubiquitin                                                                              | Ubb                 | 0.893 | 0.983 | 1.047 | 0.375 | 0.910 | 0.197 | 0.962 | 0.515 |
| 1376646_at   | BF285164  | popeye domain containing 2                                                                 | Popdc2              | 1.224 | 0.826 | 1.696 | 0.049 | 1.038 | 0.906 | 1.027 | 0.568 |
| 1388847_at   | AI177083  | Positive cofactor 2, multiprotein complex, glutamine/Q-rich-associated protein (predicted) | Pcqap_predicted     | 1.364 | 0.130 | 2.549 | 0.002 | 1.343 | 0.264 | 2.046 | 0.012 |
| 1389183_at   | BI281709  | postmeiotic segregation increased 2 (S. cerevisiae) (predicted)                            | Pms2_predicted      | 0.653 | 0.109 | 1.438 | 0.183 | 1.050 | 0.181 | 1.885 | 0.065 |
| 1387222_at   | NM_019907 | postsynaptic protein Cript                                                                 | Cript               | 0.705 | 0.690 | 0.849 | 0.672 | 0.711 | 0.106 | 0.877 | 0.467 |
| 1379276_at   | AW919982  | Potassium channel modulatory factor 1                                                      | Kcmf1               | 0.986 | 0.853 | 0.453 | 0.025 | 0.744 | 0.214 | 0.503 | 0.023 |
| 1394690_at   | AA900721  | Potassium channel regulator (predicted)                                                    | Kcnrg_predicted     | 1.009 | 0.681 | 0.952 | 0.542 | 1.011 | 0.406 | 0.934 | 0.642 |
| 1370317_at   | U78090    | potassium channel regulator 1                                                              | LOC245960           | 0.988 | 0.970 | 0.969 | 0.532 | 0.897 | 0.164 | 0.732 | 0.059 |
| 1377768_at   | BE107485  | potassium channel tetramerisation domain containing 1                                      | Kctd1               | 0.745 | 0.188 | 0.566 | 0.003 | 0.694 | 0.045 | 0.746 | 0.114 |
| 1392785_at   | AA800908  | potassium channel tetramerisation domain containing 12 (predicted)                         | Kctd12_predicted    | 2.507 | 0.053 | 3.061 | 0.007 | 1.030 | 0.906 | 1.381 | 0.342 |
| 1373045_at   | AI235230  | potassium channel tetramerisation domain containing 13                                     | Kctd13              | 0.809 | 0.310 | 2.457 | 0.000 | 0.587 | 0.313 | 1.645 | 0.027 |
| 1376211_a_at | AI235964  | potassium channel tetramerisation domain containing 6 (predicted)                          | Kctd6_predicted     | 0.955 | 0.904 | 1.373 | 0.256 | 1.223 | 0.309 | 1.112 | 0.239 |
| 1374582_at   | AI175423  | potassium channel tetramerisation domain containing 9 (predicted)                          | Kctd9_predicted     | 1.466 | 0.432 | 1.254 | 0.105 | 1.015 | 0.929 | 1.206 | 0.105 |
| 1371857_at   | AI010108  | potassium channel tetramerization domain containing 10                                     | Kctd10              | 1.012 | 0.237 | 0.724 | 0.157 | 1.485 | 0.914 | 0.858 | 0.716 |
| 1370342_at   | AF385402  | potassium channel, subfamily K, member 2                                                   | Kcnk2               | 0.792 | 0.301 | 0.582 | 0.140 | 0.779 | 0.826 | 0.331 | 0.048 |
| 1387441_at   | NM_033376 | potassium channel, subfamily K, member 3                                                   | Kcnk3               | 0.923 | 0.749 | 0.880 | 0.284 | 0.678 | 0.574 | 0.618 | 0.010 |
| 1387264_at   | NM_053806 | potassium channel, subfamily K, member 6 /// hypothetical gene supported by NM_053806      | Kcnk6 /// LOC497732 | 0.477 | 0.853 | 2.346 | 0.021 | 0.346 | 0.181 | 2.177 | 0.066 |
| 1391381_at   | BF410362  | Potassium intermediate/small conductance calcium-activated channel, subfamily N, member 2  | Kcnn2               | 0.901 | 0.650 | 0.880 | 0.328 | 0.897 | 0.724 | 0.705 | 0.923 |
| 1370111_at   | NM_019314 | potassium intermediate/small conductance calcium-activated channel, subfamily N, member 2  | Kcnn2               | 1.008 | 0.966 | 0.424 | 0.004 | 1.015 | 0.247 | 0.556 | 0.008 |
| 1368626_at   | NM_019315 | potassium intermediate/small conductance calcium-activated channel, subfamily N, member 3  | Kcnn3               | 5.193 | 0.066 | 3.436 | 0.002 | 0.998 | 0.697 | 2.666 | 0.006 |
| 1391007_s_at | BE113377  | potassium inwardly rectifying channel, subfamily J, member 11                              | Kcnj11              | 0.867 | 0.035 | 0.600 | 0.002 | 0.407 | 0.011 | 0.540 | 0.021 |
| 1387698_at   | AB043638  | potassium inwardly rectifying channel, subfamily J, member 11                              | Kcnj11              | 0.632 | 0.141 | 0.533 | 0.011 | 0.315 | 0.013 | 0.400 | 0.006 |
| 1369261_at   | NM_053608 | potassium inwardly-rectifying channel, subfamily J, member 13                              | Kcnj13              | 0.972 | 0.948 | 0.930 | 0.450 | 1.182 | 0.170 | 1.001 | 0.994 |



|              |           |                                                                                    |                   |        |       |       |       |        |       |        |       |
|--------------|-----------|------------------------------------------------------------------------------------|-------------------|--------|-------|-------|-------|--------|-------|--------|-------|
| 1370970_at   | AI1717104 | potassium inwardly-rectifying channel, subfamily J, member 14                      | Kcnj14            | 1.187  | 0.304 | 1.666 | 0.208 | 1.180  | 0.987 | 2.163  | 0.518 |
| 1369741_at   | U09243    | potassium inwardly-rectifying channel, subfamily J, member 3                       | Kcnj3             | 1.204  | 0.494 | 0.892 | 0.768 | 1.886  | 0.125 | 1.110  | 0.562 |
| 1368560_at   | NM_017297 | potassium inwardly-rectifying channel, subfamily J, member 5                       | Kcnj5             | 1.925  | 0.025 | 0.996 | 0.894 | 1.003  | 0.916 | 0.924  | 0.270 |
| 1370704_at   | AB073756  | potassium inwardly-rectifying channel, subfamily J, member 6                       | Kcnj6             | 1.007  | 0.909 | 0.852 | 0.108 | 1.164  | 0.253 | 0.771  | 0.111 |
| 1369035_a_at | AB073753  | potassium inwardly-rectifying channel, subfamily J, member 6                       | Kcnj6             | 1.011  | 0.944 | 1.002 | 0.964 | 1.052  | 0.942 | 1.544  | 0.022 |
| 1369334_at   | NM_031828 | potassium large conductance calcium-activated channel, subfamily M, alpha member 1 | Kcnma1            | 0.826  | 0.041 | 0.472 | 0.002 | 0.885  | 0.354 | 0.501  | 0.015 |
| 1372929_at   | AI010839  | potassium large conductance calcium-activated channel, subfamily M, alpha member 1 | Kcnma1            | 0.699  | 0.258 | 0.751 | 0.005 | 0.607  | 0.013 | 0.742  | 0.034 |
| 1379863_at   | AW528891  | potassium voltage gated channel, Shal-related family, member 2                     | Kcnd2             | 1.508  | 0.517 | 1.364 | 0.172 | 1.134  | 0.203 | 1.112  | 0.881 |
| 1369144_a_at | NM_031739 | potassium voltage gated channel, Shaw-related family, member 3                     | Kcnd3             | 1.918  | 0.252 | 0.964 | 0.896 | 1.085  | 0.874 | 0.896  | 0.724 |
| 1368524_at   | NM_012856 | potassium voltage gated channel, Shaw-related subfamily, member 1                  | Kcnc1             | 1.375  | 0.130 | 1.084 | 0.448 | 1.698  | 0.030 | 1.048  | 0.443 |
| 1378738_at   | BE097574  | potassium voltage-gated channel, shaker-related subfamily, beta member 1           | Kcnab1            | 2.045  | 0.059 | 0.556 | 0.184 | 1.543  | 0.128 | 0.473  | 0.011 |
| 1391963_at   | BF396103  | Potassium voltage-gated channel, shaker-related subfamily, beta member 1           | Kcnab1            | 2.037  | 0.998 | 1.282 | 0.461 | 1.085  | 0.827 | 1.429  | 0.811 |
| 1369043_at   | NM_012971 | potassium voltage-gated channel, shaker-related subfamily, member 4                | Kcna4             | 1.837  | 0.018 | 0.791 | 0.128 | 1.592  | 0.224 | 1.362  | 0.174 |
| 1368343_at   | NM_053949 | potassium voltage-gated channel, subfamily H (eag-related), member 2               | Kcnh2             | 1.304  | 0.369 | 1.387 | 0.720 | 0.802  | 0.117 | 1.180  | 0.220 |
| 1369017_at   | NM_053937 | potassium voltage-gated channel, subfamily H (eag-related), member 6               | Kcnh6             | 0.653  | 0.051 | 0.255 | 0.003 | 0.204  | 0.038 | 0.243  | 0.013 |
| 1397599_at   | BF394205  | Potassium voltage-gated channel, subfamily Q, member 3                             | Kcnq3             | 3.074  | 0.072 | 2.638 | 0.082 | 1.192  | 0.138 | 2.817  | 0.019 |
| 1379836_at   | BF400850  | Potassium voltage-gated channel, subfamily Q, member 3                             | Kcnq3             | 2.330  | 0.080 | 1.586 | 0.179 | 2.399  | 0.133 | 2.440  | 0.006 |
| 1382902_at   | AA943147  | potential ubiquitin ligase                                                         | Herc6             | 19.632 | 0.002 | 6.640 | 0.022 | 35.983 | 0.004 | 22.115 | 0.003 |
| 1370995_at   | AW528459  | POU domain, class 2, transcription factor 1                                        | Pou2f1            | 3.390  | 0.017 | 1.289 | 0.073 | 1.912  | 0.019 | 0.973  | 0.212 |
| 1370432_at   | M72711    | POU domain, class 3, transcription factor 1                                        | Pou3f1            | 2.572  | 0.749 | 0.938 | 0.786 | 3.224  | 0.068 | 2.530  | 0.013 |
| 1371043_a_at | BE107327  | POU domain, class 3, transcription factor 3                                        | Pou3f3            | 1.479  | 0.137 | 0.999 | 0.904 | 0.956  | 0.970 | 1.082  | 0.850 |
| 1380211_at   | BE109046  | POU domain, class 4, transcription factor 1                                        | Pou4f1            | 1.022  | 0.940 | 0.907 | 0.976 | 0.995  | 0.808 | 0.950  | 0.912 |
| 1373573_at   | H31907    | PP3111 protein                                                                     | Pp3111            | 0.691  | 0.025 | 0.708 | 0.074 | 0.665  | 0.050 | 0.760  | 0.139 |
| 1373465_at   | AI228284  | PQ loop repeat containing 1                                                        | Pqlc1             | 0.814  | 0.547 | 0.824 | 0.102 | 1.255  | 0.094 | 0.592  | 0.057 |
| 1377179_at   | BI283849  | PQ loop repeat containing 2 (predicted)                                            | Pqlc2_predicted   | 0.901  | 0.460 | 0.999 | 0.486 | 0.903  | 0.463 | 1.000  | 0.623 |
| 1390839_at   | AW915795  | PQ loop repeat containing 3                                                        | Pqlc3             | 0.968  | 0.719 | 1.038 | 0.390 | 0.380  | 0.095 | 1.247  | 0.256 |
| 1390165_at   | BI288756  | PR domain containing 15 (predicted)                                                | Prdm15_predicted  | 1.306  | 0.133 | 0.739 | 0.058 | 1.066  | 0.946 | 0.869  | 0.064 |
| 1373712_at   | BI282710  | PR domain containing 2, with ZNF domain (mapped)                                   | Prdm2_mapped      | 0.860  | 0.356 | 1.004 | 0.469 | 1.777  | 0.935 | 1.023  | 0.961 |
| 1389104_s_at | BF388420  | PR domain containing 2, with ZNF domain (mapped)                                   | Prdm2_mapped      | 0.938  | 0.518 | 1.202 | 0.362 | 1.188  | 0.229 | 1.189  | 0.816 |
| 1370639_at   | U17837    | PR domain containing 2, with ZNF domain (mapped)                                   | Prdm2_mapped      | 0.984  | 0.532 | 1.461 | 0.036 | 1.376  | 0.158 | 1.201  | 0.934 |
| 1390202_at   | BI289584  | PR domain containing 2, with ZNF domain (mapped)                                   | Prdm2_mapped      | 0.935  | 0.544 | 0.785 | 0.979 | 0.927  | 0.583 | 1.004  | 0.999 |
| 1397553_s_at | AI101637  | PR domain containing 2, with ZNF domain (mapped)                                   | Prdm2_mapped      | 3.066  | 0.971 | 1.679 | 0.920 | 1.341  | 0.404 | 1.111  | 0.230 |
| 1369236_at   | NM_133312 | PR domain containing 4                                                             | Prdm4             | 1.014  | 0.231 | 1.008 | 0.853 | 0.930  | 0.072 | 0.999  | 0.916 |
| 1372931_at   | AI178741  | PRA1 domain family 2 (predicted)                                                   | Praf2_predicted   | 0.413  | 0.252 | 1.216 | 0.171 | 0.378  | 0.053 | 1.226  | 0.645 |
| 1387903_at   | D32249    | praja 2, RING-H2 motif containing                                                  | Pja2              | 0.754  | 0.697 | 0.623 | 0.001 | 0.793  | 0.234 | 0.578  | 0.004 |
| 1375421_a_at | AI600019  | praja 2, RING-H2 motif containing                                                  | Pja2              | 0.958  | 0.934 | 1.309 | 0.002 | 0.641  | 0.176 | 1.267  | 0.049 |
| 1374503_at   | AI709810  | pre B-cell leukemia transcription factor 3 (predicted)                             | Pbx3_predicted    | 0.834  | 0.108 | 0.894 | 0.735 | 0.675  | 0.044 | 0.703  | 0.036 |
| 1389014_at   | BI297612  | pre-B-cell colony enhancing factor 1                                               | Pbef1             | 3.439  | 0.006 | 3.801 | 0.000 | 3.490  | 0.001 | 3.798  | 0.002 |
| 1396262_at   | BM384211  | pre-B-cell colony enhancing factor 1                                               | Pbef1             | 3.950  | 0.022 | 3.051 | 0.126 | 2.926  | 0.014 | 3.317  | 0.028 |
| 1378458_at   | BI281745  | Pre-B-cell leukemia transcription factor 1 (predicted)                             | Pbx1_predicted    | 0.725  | 0.183 | 0.993 | 0.700 | 0.589  | 0.164 | 1.053  | 0.795 |
| 1380747_at   | BE098757  | Pre-B-cell leukemia transcription factor 1 (predicted)                             | Pbx1_predicted    | 0.840  | 0.328 | 0.799 | 0.027 | 1.154  | 0.974 | 0.648  | 0.036 |
| 1398487_at   | BF419639  | pre-B-cell leukemia transcription factor 1 (predicted)                             | Pbx1_predicted    | 0.831  | 0.593 | 0.910 | 0.188 | 0.928  | 0.743 | 0.998  | 0.195 |
| 1389432_at   | BE101096  | pre-B-cell leukemia transcription factor 2                                         | Pbx2              | 0.908  | 0.928 | 0.734 | 0.256 | 0.977  | 0.714 | 0.606  | 0.010 |
| 1381262_at   | BG374101  | Pre-B-cell leukemia transcription factor interacting protein 1                     | Pbxip1            | 1.363  | 0.970 | 0.930 | 0.270 | 1.104  | 0.994 | 0.859  | 0.731 |
| 1398926_at   | AI410456  | prefoldin 1 (predicted)                                                            | Pfdn1_predicted   | 0.553  | 0.007 | 0.815 | 0.021 | 0.558  | 0.082 | 0.733  | 0.070 |
| 1398884_at   | BM384924  | prefoldin 5 (predicted)                                                            | Pfdn5_predicted   | 0.960  | 0.925 | 1.294 | 0.106 | 0.781  | 0.137 | 1.350  | 0.024 |
| 1370413_at   | L26398    | pregnancy specific beta-1-glycoprotein 4                                           | Psg4              | 1.001  | 0.987 | 0.996 | 0.937 | 1.003  | 0.969 | 0.992  | 0.959 |
| 1370547_at   | M84000    | pregnancy-zone protein                                                             | Pzp               | 1.011  | 0.999 | 1.000 | 0.987 | 0.998  | 0.988 | 1.002  | 0.997 |
| 1387089_at   | NM_133528 | preimplantation protein 3                                                          | Prei3             | 0.903  | 0.637 | 0.544 | 0.021 | 0.641  | 0.012 | 0.715  | 0.021 |
| 1384792_at   | BE107114  | pre-mRNA processing factor 40 homolog A (yeast) (predicted)                        | Prpf40a_predicted | 1.543  | 0.302 | 1.187 | 0.414 | 0.740  | 0.714 | 0.890  | 0.665 |
| 1367466_at   | AI406518  | pre-mRNA processing factor 8                                                       | Prpf8             | 0.663  | 0.748 | 0.775 | 0.631 | 0.620  | 0.080 | 0.965  | 0.879 |
| 1387836_at   | NM_031692 | prenylated SNARE protein                                                           | Ykt6              | 1.003  | 0.594 | 1.620 | 0.054 | 0.404  | 0.172 | 1.228  | 0.424 |
| 1372505_at   | BM391393  | Prenylated SNARE protein                                                           | Ykt6              | 0.988  | 0.690 | 0.729 | 0.008 | 0.825  | 0.074 | 0.782  | 0.019 |
| 1370407_at   | AF332142  | prenylcysteine oxidase 1                                                           | Pcyox1            | 0.406  | 0.002 | 0.613 | 0.002 | 0.428  | 0.004 | 0.568  | 0.025 |
| 1388165_at   | X53232    | preoptic regulatory factor-2                                                       | PORF-2            | 1.191  | 0.626 | 1.594 | 0.064 | 0.969  | 0.934 | 1.130  | 0.196 |
| 1371092_at   | X15679    | preprotrypsinogen IV                                                               | LOC286960         | 1.070  | 0.457 | 0.116 | 0.000 | 0.983  | 0.793 | 0.095  | 0.033 |
| 1376075_at   | BM385544  | presenilin 1                                                                       | Psen1             | 1.842  | 0.073 | 1.726 | 0.025 | 1.624  | 0.047 | 2.651  | 0.008 |
| 1368792_at   | NM_019163 | presenilin 1                                                                       | Psen1             | 0.950  | 0.726 | 1.334 | 0.174 | 0.816  | 0.318 | 0.905  | 0.153 |
| 1370064_at   | AB004454  | presenilin 2                                                                       | Psen2             | 1.002  | 0.949 | 1.113 | 0.082 | 1.115  | 0.993 | 1.116  | 0.102 |
| 1372645_at   | AI233095  | presenilin associated, rhomboid-like                                               | Psarl             | 0.676  | 0.186 | 0.874 | 0.336 | 0.728  | 0.025 | 1.023  | 0.952 |
| 1371338_at   | AI232272  | presenilin enhancer 2 homolog (C. elegans)                                         | Psenen            | 0.751  | 0.770 | 0.886 | 0.089 | 0.696  | 0.009 | 0.869  | 0.076 |

|              |           |                                                                                                             |                    |        |       |        |       |        |       |        |       |
|--------------|-----------|-------------------------------------------------------------------------------------------------------------|--------------------|--------|-------|--------|-------|--------|-------|--------|-------|
| 1379369_at   | AI171526  | Prickle-like 1 (Drosophila)                                                                                 | Prickle1           | 0.658  | 0.489 | 2.647  | 0.032 | 0.531  | 0.024 | 1.617  | 0.100 |
| 1370156_at   | BI278802  | prion protein                                                                                               | Prnp               | 0.856  | 0.340 | 0.516  | 0.000 | 0.785  | 0.081 | 0.626  | 0.001 |
| 1368702_at   | U05989    | PRKC, apoptosis, WT1, regulator                                                                             | Pawr               | 3.070  | 0.014 | 3.385  | 0.000 | 2.402  | 0.058 | 2.841  | 0.001 |
| 1371845_at   | BF287209  | processing of precursor 4, ribonuclease P/MRP family, (S. cerevisiae)                                       | Pop4               | 0.381  | 0.367 | 0.901  | 0.585 | 0.342  | 0.102 | 0.693  | 0.266 |
| 1389336_at   | BM390893  | processing of precursor 5, ribonuclease P/MRP family (S. cerevisiae) (predicted)                            | Pop5_predicted     | 0.395  | 0.001 | 0.733  | 0.082 | 0.610  | 0.090 | 0.663  | 0.408 |
| 1373597_at   | AI102689  | processing of precursor 7, ribonuclease P family, (S. cerevisiae) (predicted)                               | Pop7_predicted     | 0.866  | 0.639 | 1.000  | 0.976 | 0.841  | 0.614 | 1.048  | 0.609 |
| 1386912_at   | NM_019237 | procollagen C-endopeptidase enhancer protein                                                                | Pcolce             | 0.796  | 0.121 | 0.507  | 0.001 | 1.008  | 0.546 | 0.612  | 0.005 |
| 1387854_at   | BI282748  | procollagen, type I, alpha 2                                                                                | Col1a2             | 1.482  | 0.630 | 0.728  | 0.025 | 1.139  | 0.246 | 0.643  | 0.170 |
| 1388973_at   | BM388861  | procollagen, type IX, alpha 1                                                                               | Col9a1             | 0.373  | 0.001 | 0.062  | 0.000 | 0.555  | 0.048 | 0.142  | 0.004 |
| 1370895_at   | AI179399  | procollagen, type V, alpha 2                                                                                | Col5a2             | 1.266  | 0.119 | 0.697  | 0.203 | 1.105  | 0.147 | 0.853  | 0.819 |
| 1389966_at   | AI176126  | procollagen, type VI, alpha 3 (predicted)                                                                   | Col6a3_predicted   | 1.001  | 0.982 | 1.002  | 1.000 | 0.983  | 0.840 | 0.948  | 0.818 |
| 1392915_at   | BM389291  | procollagen, type XI, alpha 1                                                                               | Col11a1            | 0.999  | 0.995 | 0.757  | 0.261 | 2.125  | 0.305 | 1.000  | 0.998 |
| 1389891_at   | BM391350  | procollagen, type XI, alpha 2 (mapped)                                                                      | Col11a2_mapped     | 1.295  | 0.188 | 0.792  | 0.528 | 2.545  | 0.025 | 1.029  | 0.925 |
| 1390846_at   | BG380309  | procollagen, type XVI, alpha 1                                                                              | Col16a1            | 0.507  | 0.104 | 0.188  | 0.003 | 0.522  | 0.304 | 0.294  | 0.001 |
| 1388459_at   | AI101782  | procollagen, type XVIII, alpha 1                                                                            | Col18a1            | 0.394  | 0.018 | 0.697  | 0.523 | 0.877  | 0.784 | 0.483  | 0.062 |
| 1398394_at   | BE108058  | Procollagen, type XVIII, alpha 1                                                                            | Col18a1            | 0.824  | 0.750 | 1.310  | 0.641 | 0.592  | 0.999 | 2.388  | 0.790 |
| 1381431_at   | AW252296  | Procollagen, type XVIII, alpha 1                                                                            | Col18a1            | 0.999  | 0.992 | 1.450  | 0.080 | 1.001  | 0.991 | 1.022  | 0.989 |
| 1374870_at   | BF286402  | Procollagen, type XXVII, alpha 1                                                                            | Col27a1            | 1.155  | 0.598 | 0.562  | 0.005 | 1.589  | 0.274 | 0.680  | 0.112 |
| 1367807_at   | NM_053827 | procollagen-lysine, 2-oxoglutarate 5-dioxygenase 1                                                          | Plod1              | 0.726  | 0.159 | 1.963  | 0.000 | 0.857  | 0.682 | 1.233  | 0.190 |
| 1372877_at   | BI304070  | procollagen-lysine, 2-oxoglutarate 5-dioxygenase 3                                                          | Plod3              | 1.005  | 0.231 | 0.629  | 0.002 | 1.182  | 0.045 | 0.932  | 0.188 |
| 1370954_at   | BI274401  | procollagen-proline, 2-oxoglutarate 4-dioxygenase (proline 4-hydroxylase), alpha 1 polypeptide              | P4ha1              | 0.382  | 0.383 | 2.175  | 0.069 | 0.547  | 0.025 | 1.707  | 0.071 |
| 1372610_at   | BI274349  | procollagen-proline, 2-oxoglutarate 4-dioxygenase (proline 4-hydroxylase), alpha II polypeptide (predicted) | P4ha2_predicted    | 0.776  | 0.232 | 1.135  | 0.135 | 1.002  | 0.274 | 1.025  | 0.360 |
| 1367605_at   | NM_022511 | profilin 1                                                                                                  | Pfn1               | 1.065  | 0.632 | 1.508  | 0.229 | 1.118  | 0.778 | 1.083  | 0.321 |
| 1387015_at   | NM_030873 | profilin 2                                                                                                  | Pfn2               | 0.437  | 0.143 | 1.184  | 0.268 | 0.384  | 0.007 | 0.992  | 0.672 |
| 1398961_at   | AI232296  | Profilin 2                                                                                                  | Pfn2               | 0.737  | 0.516 | 1.306  | 0.161 | 0.597  | 0.165 | 1.142  | 0.055 |
| 1367970_at   | AF228737  | profilin 2                                                                                                  | Pfn2               | 0.991  | 0.803 | 1.078  | 0.289 | 0.756  | 0.714 | 0.897  | 0.028 |
| 1389701_at   | AI599419  | Progesterone receptor                                                                                       | Pgr                | 1.096  | 0.932 | 0.342  | 0.035 | 0.836  | 0.501 | 0.714  | 0.786 |
| 1387563_at   | NM_022847 | progesterone receptor                                                                                       | Pgr                | 1.002  | 0.994 | 0.991  | 0.916 | 0.981  | 0.994 | 0.986  | 0.090 |
| 1367619_at   | NM_021766 | progesterone receptor membrane component 1                                                                  | Pgrmc1             | 0.713  | 0.046 | 0.718  | 0.000 | 0.761  | 0.013 | 0.744  | 0.047 |
| 1378515_at   | BE116005  | Progesterone receptor membrane component 1                                                                  | Pgrmc1             | 0.434  | 0.096 | 1.064  | 0.847 | 0.402  | 0.042 | 0.667  | 0.227 |
| 1379427_at   | AI137488  | progesterone receptor membrane component 2                                                                  | Pgrmc2             | 0.433  | 0.219 | 1.133  | 0.519 | 0.406  | 0.029 | 0.579  | 0.141 |
| 1388531_at   | BF283382  | progesterone receptor membrane component 2                                                                  | Pgrmc2             | 0.796  | 0.249 | 1.150  | 0.076 | 0.527  | 0.014 | 0.951  | 0.445 |
| 1389169_at   | AA944158  | progesterone receptor membrane component 2                                                                  | Pgrmc2             | 0.688  | 0.450 | 0.599  | 0.017 | 0.482  | 0.058 | 0.569  | 0.012 |
| 1392927_at   | BG381724  | progesterin and adipoQ receptor family member IV                                                            | Paqr4              | 2.561  | 0.033 | 1.181  | 0.049 | 1.219  | 0.515 | 1.004  | 0.959 |
| 1367719_at   | NM_053989 | progesterin induced protein                                                                                 | Dd5                | 1.138  | 0.258 | 1.426  | 0.003 | 0.811  | 0.022 | 1.399  | 0.024 |
| 1382603_at   | AW521319  | Programmed cell death 1 ligand 2 (predicted)                                                                | Pdcd1lg2_predicted | 17.586 | 0.000 | 10.259 | 0.000 | 21.485 | 0.000 | 13.546 | 0.003 |
| 1371002_at   | AI704628  | programmed cell death 2                                                                                     | Pdcd2              | 1.325  | 0.218 | 2.101  | 0.010 | 1.128  | 0.327 | 1.903  | 0.033 |
| 1387521_at   | NM_022265 | programmed cell death 4                                                                                     | Pdcd4              | 0.581  | 0.091 | 0.185  | 0.004 | 0.626  | 0.090 | 0.179  | 0.009 |
| 1389454_at   | BF408447  | programmed cell death 5 (predicted)                                                                         | Pdcd5_predicted    | 0.753  | 0.121 | 1.440  | 0.000 | 0.874  | 0.508 | 1.277  | 0.125 |
| 1388767_at   | BI296393  | programmed cell death 6 (predicted)                                                                         | Pdcd6_predicted    | 1.020  | 0.964 | 1.483  | 0.039 | 1.067  | 0.570 | 1.441  | 0.075 |
| 1388120_at   | BE328942  | programmed cell death 6 interacting protein                                                                 | Pdcd6ip            | 1.139  | 0.510 | 2.246  | 0.000 | 1.191  | 0.644 | 1.656  | 0.010 |
| 1370321_at   | AF262320  | programmed cell death 8                                                                                     | Pdcd8              | 1.171  | 0.273 | 1.117  | 0.132 | 1.145  | 0.164 | 1.186  | 0.028 |
| 1379317_a_at | BI280308  | programmed cell death protein 11 (predicted)                                                                | Pdcd11_predicted   | 0.753  | 0.298 | 1.614  | 0.049 | 0.806  | 0.422 | 1.322  | 0.400 |
| 1389322_at   | AI013847  | programmed cell death protein 7 (predicted)                                                                 | Pdcd7_predicted    | 0.696  | 0.017 | 0.756  | 0.155 | 0.883  | 0.385 | 0.734  | 0.146 |
| 1385709_x_at | AW529028  | Progressive ankylosis homolog (mouse)                                                                       | Ank                | 0.236  | 0.008 | 0.173  | 0.001 | 0.206  | 0.001 | 0.236  | 0.009 |
| 1394202_x_at | AI176117  | Progressive ankylosis homolog (mouse)                                                                       | Ank                | 0.570  | 0.012 | 0.821  | 0.055 | 0.524  | 0.008 | 0.824  | 0.048 |
| 1393439_a_at | AI045767  | progressive ankylosis homolog (mouse)                                                                       | Ank                | 0.278  | 0.019 | 0.208  | 0.000 | 0.286  | 0.000 | 0.275  | 0.018 |
| 1369249_at   | NM_053714 | progressive ankylosis homolog (mouse)                                                                       | Ank                | 0.180  | 0.043 | 0.226  | 0.024 | 0.129  | 0.018 | 0.260  | 0.010 |
| 1386344_at   | BG662519  | Progressive ankylosis homolog (mouse)                                                                       | Ank                | 0.298  | 0.163 | 0.365  | 0.003 | 0.215  | 0.004 | 0.403  | 0.008 |
| 1375815_at   | BF391129  | Progressive ankylosis homolog (mouse)                                                                       | Ank                | 0.867  | 0.169 | 0.271  | 0.000 | 0.821  | 0.098 | 0.321  | 0.006 |
| 1367926_at   | NM_031851 | prohibitin                                                                                                  | Phb                | 0.633  | 0.088 | 0.358  | 0.022 | 0.656  | 0.001 | 0.654  | 0.020 |
| 1367927_at   | BI282863  | prohibitin                                                                                                  | Phb                | 0.556  | 0.292 | 0.776  | 0.115 | 0.470  | 0.058 | 0.775  | 0.032 |
| 1367463_at   | AI235510  | prohibitin 2                                                                                                | Phb2               | 0.566  | 0.053 | 1.251  | 0.003 | 0.477  | 0.003 | 1.083  | 0.328 |
| 1370789_a_at | L48060    | prolactin receptor                                                                                          | Prlr               | 0.146  | 0.023 | 0.214  | 0.000 | 0.380  | 0.038 | 0.214  | 0.006 |
| 1376944_at   | AI407163  | Prolactin receptor                                                                                          | Prlr               | 0.407  | 0.041 | 0.168  | 0.002 | 0.491  | 0.071 | 0.346  | 0.009 |
| 1392612_at   | AW142962  | Prolactin receptor                                                                                          | Prlr               | 0.366  | 0.067 | 0.134  | 0.008 | 0.496  | 0.138 | 0.138  | 0.027 |
| 1370384_a_at | M57668    | prolactin receptor                                                                                          | Prlr               | 0.361  | 0.321 | 0.174  | 0.005 | 0.378  | 0.022 | 0.230  | 0.031 |
| 1370300_at   | AF061817  | prolactin regulatory element binding                                                                        | Preb               | 0.398  | 0.005 | 1.057  | 0.989 | 0.369  | 0.058 | 0.659  | 0.180 |
| 1368107_at   | NM_031316 | prolactin-like protein 1                                                                                    | Prlpi              | 1.048  | 0.319 | 0.983  | 0.969 | 0.903  | 0.286 | 1.009  | 0.937 |
| 1398302_at   | AI013501  | prolactin-like protein F                                                                                    | Prlpf              | 0.999  | 0.567 | 1.001  | 0.961 | 0.987  | 0.879 | 1.069  | 0.794 |
| 1367671_at   | NM_022381 | proliferating cell nuclear antigen                                                                          | Pcna               | 0.541  | 0.022 | 1.338  | 0.002 | 0.543  | 0.000 | 1.151  | 0.340 |

|              |           |                                                                         |                  |       |       |       |       |       |       |       |       |
|--------------|-----------|-------------------------------------------------------------------------|------------------|-------|-------|-------|-------|-------|-------|-------|-------|
| 1383421_at   | BM386110  | Proliferating cell nuclear antigen                                      | Pcna             | 1.077 | 0.560 | 6.311 | 0.002 | 0.660 | 0.018 | 4.730 | 0.000 |
| 1371593_at   | BI296121  | Proliferating cell nuclear antigen                                      | Pcna             | 0.686 | 0.614 | 0.634 | 0.013 | 0.506 | 0.006 | 0.565 | 0.017 |
| 1388353_at   | BI296168  | proliferation-associated 2G4                                            | Pa2g4            | 0.560 | 0.329 | 2.312 | 0.003 | 0.404 | 0.001 | 1.552 | 0.096 |
| 1370381_at   | U61729    | proline rich 2                                                          | Pnrc1            | 1.913 | 0.000 | 1.801 | 0.000 | 2.412 | 0.001 | 1.911 | 0.001 |
| 1389549_at   | AI172262  | proline synthetase co-transcribed (predicted)                           | Prosc_predicted  | 0.690 | 0.005 | 0.630 | 0.032 | 0.632 | 0.044 | 0.885 | 0.119 |
| 1383722_at   | H33436    | proline synthetase co-transcribed (predicted)                           | Prosc_predicted  | 0.984 | 0.046 | 0.275 | 0.021 | 0.959 | 0.648 | 0.203 | 0.018 |
| 1376131_a_at | AW535500  | proline, glutamic acid and leucine rich protein 1                       | Pelp1            | 0.989 | 0.482 | 0.975 | 0.796 | 0.941 | 0.619 | 1.064 | 0.716 |
| 1374567_at   | AI408443  | proline/serine-rich coiled-coil 2                                       | Psrc2            | 1.135 | 0.887 | 0.693 | 0.013 | 1.547 | 0.029 | 0.966 | 0.666 |
| 1371603_at   | BI291379  | proline-rich polypeptide 3                                              | Prr3             | 1.054 | 0.180 | 0.846 | 0.074 | 0.998 | 0.850 | 0.852 | 0.089 |
| 1372702_at   | BI284972  | proline-rich protein                                                    | PRP-2            | 0.673 | 0.185 | 0.275 | 0.001 | 0.681 | 0.003 | 0.253 | 0.006 |
| 1367635_at   | NM_012998 | prolyl 4-hydroxylase, beta polypeptide                                  | P4hb             | 0.938 | 0.682 | 1.041 | 0.097 | 0.923 | 0.677 | 0.951 | 0.232 |
| 1368234_at   | NM_031324 | prolyl endopeptidase                                                    | Prep             | 0.448 | 0.024 | 1.151 | 0.324 | 0.610 | 0.004 | 1.057 | 0.507 |
| 1379248_at   | AA926318  | Prolylcarboxypeptidase (angiotensinase C) (predicted)                   | Prpc_predicted   | 1.009 | 0.975 | 1.075 | 0.737 | 0.893 | 0.997 | 0.877 | 0.041 |
| 1389527_at   | BM384073  | promethin                                                               | LOC378467        | 0.999 | 0.578 | 1.355 | 0.157 | 0.998 | 0.984 | 1.404 | 0.109 |
| 1368008_at   | NM_021751 | prominin 1                                                              | Prom1            | 0.999 | 0.992 | 0.354 | 0.000 | 0.193 | 0.065 | 0.284 | 0.033 |
| 1379019_at   | AI639534  | properdin factor, complement (mapped)                                   | Pfc_mapped       | 3.472 | 0.060 | 1.994 | 0.018 | 3.617 | 0.036 | 1.555 | 0.545 |
| 1370187_at   | AI502661  | propionyl coenzyme A carboxylase, beta polypeptide                      | Pccb             | 0.954 | 0.506 | 0.729 | 0.177 | 0.994 | 0.982 | 1.007 | 0.909 |
| 1387247_at   | M83745    | proprotein convertase subtilisin/kexin type 1                           | Pcsk1            | 0.414 | 0.112 | 0.167 | 0.001 | 0.560 | 0.026 | 0.235 | 0.025 |
| 1368559_at   | NM_017091 | proprotein convertase subtilisin/kexin type 1                           | Pcsk1            | 0.481 | 0.575 | 0.179 | 0.000 | 0.480 | 0.123 | 0.271 | 0.007 |
| 1367835_at   | NM_019279 | proprotein convertase subtilisin/kexin type 1 inhibitor                 | Pcsk1n           | 0.731 | 0.518 | 0.288 | 0.000 | 0.703 | 0.020 | 0.405 | 0.004 |
| 1397662_at   | BF395791  | Proprotein convertase subtilisin/kexin type 2                           | Pcsk2            | 0.918 | 0.484 | 0.264 | 0.006 | 1.045 | 0.367 | 0.545 | 0.029 |
| 1387155_at   | NM_012746 | proprotein convertase subtilisin/kexin type 2                           | Pcsk2            | 0.782 | 0.884 | 0.451 | 0.001 | 0.762 | 0.924 | 0.585 | 0.000 |
| 1392773_at   | AA859578  | proprotein convertase subtilisin/kexin type 5                           | Pcsk5            | 0.873 | 0.192 | 1.007 | 0.970 | 0.422 | 0.135 | 0.980 | 0.261 |
| 1387812_at   | NM_012999 | proprotein convertase subtilisin/kexin type 6                           | Pcsk6            | 1.063 | 0.632 | 5.688 | 0.000 | 0.998 | 0.327 | 4.514 | 0.023 |
| 1385640_at   | AI059511  | proprotein convertase subtilisin/kexin type 9                           | Pcsk9            | 1.000 | 0.533 | 0.346 | 0.029 | 1.466 | 0.927 | 0.777 | 0.070 |
| 1369929_at   | NM_013013 | prosaposin                                                              | Psap             | 0.770 | 0.961 | 0.630 | 0.002 | 0.863 | 0.772 | 0.633 | 0.011 |
| 1367851_at   | J04488    | prostaglandin D2 synthase                                               | Ptgsd            | 1.014 | 0.137 | 0.898 | 0.015 | 1.136 | 0.179 | 0.942 | 0.045 |
| 1385434_at   | AI705087  | Prostaglandin E receptor 2, subtype EP2                                 | Ptger2           | 0.998 | 0.989 | 0.802 | 0.286 | 1.899 | 0.051 | 1.018 | 0.202 |
| 1374532_at   | AI704291  | prostaglandin E synthase 2 (predicted)                                  | Ptges2_predicted | 0.816 | 0.661 | 2.000 | 0.008 | 0.598 | 0.008 | 2.183 | 0.012 |
| 1371372_at   | AA944161  | prostaglandin E synthase 3 (cytosolic) (predicted)                      | Ptges3_predicted | 0.792 | 0.571 | 1.527 | 0.032 | 0.724 | 0.254 | 1.366 | 0.029 |
| 1367986_at   | NM_019243 | prostaglandin F2 receptor negative regulator                            | Ptgfrn           | 2.275 | 0.041 | 2.992 | 0.006 | 3.260 | 0.001 | 3.381 | 0.003 |
| 1368259_at   | NM_017043 | prostaglandin-endoperoxide synthase 1                                   | Ptgs1            | 4.582 | 0.007 | 9.535 | 0.000 | 2.246 | 0.048 | 7.350 | 0.010 |
| 1368527_at   | U03389    | prostaglandin-endoperoxide synthase 2                                   | Ptgs2            | 6.359 | 0.018 | 2.138 | 0.021 | 1.215 | 0.806 | 1.728 | 0.012 |
| 1382075_at   | BF386499  | Prostate tumor over expressed gene 1                                    | Ptov1            | 0.424 | 0.045 | 0.519 | 0.039 | 1.000 | 0.073 | 0.492 | 0.039 |
| 1388430_at   | BI280292  | prostate tumor over expressed gene 1                                    | Ptov1            | 0.474 | 0.271 | 0.442 | 0.042 | 0.517 | 0.037 | 0.521 | 0.003 |
| 1398247_at   | NM_133404 | protease, serine, 15                                                    | Prss15           | 1.211 | 0.239 | 6.044 | 0.005 | 0.950 | 0.659 | 3.708 | 0.001 |
| 1373152_at   | AI177099  | protease, serine, 23                                                    | Prss23           | 1.437 | 0.076 | 2.925 | 0.002 | 0.837 | 0.079 | 2.099 | 0.014 |
| 1367478_at   | AI600136  | protease, serine, 25                                                    | Prss25           | 1.306 | 0.016 | 1.174 | 0.240 | 2.415 | 0.003 | 2.250 | 0.007 |
| 1379747_at   | AA866443  | Protease, serine, 35                                                    | Prss35           | 1.865 | 0.117 | 2.229 | 0.039 | 0.671 | 0.144 | 2.537 | 0.082 |
| 1388582_at   | BM392043  | proteasome (prosome, macropain) 28 subunit, 3                           | Psme3            | 0.721 | 0.906 | 1.018 | 0.740 | 0.950 | 0.846 | 0.793 | 0.296 |
| 1372506_at   | AI233766  | proteasome (prosome, macropain) 28 subunit, 3                           | Psme3            | 0.719 | 0.977 | 1.777 | 0.057 | 0.507 | 0.068 | 1.187 | 0.327 |
| 1367711_at   | NM_033236 | proteasome (prosome, macropain) 26S subunit, ATPase 2                   | Psmc2            | 0.915 | 0.274 | 1.418 | 0.003 | 0.853 | 0.027 | 1.402 | 0.005 |
| 1387120_at   | NM_031595 | proteasome (prosome, macropain) 26S subunit, ATPase 3                   | Psmc3            | 0.852 | 0.639 | 1.074 | 0.565 | 0.501 | 0.000 | 0.995 | 0.950 |
| 1398869_at   | BG378826  | proteasome (prosome, macropain) 26S subunit, ATPase, 4                  | Psmc4            | 0.802 | 0.601 | 1.161 | 0.021 | 1.027 | 0.532 | 1.284 | 0.026 |
| 1382385_at   | BE116344  | proteasome (prosome, macropain) 26S subunit, ATPase, 6                  | Psmc6            | 0.473 | 0.048 | 0.600 | 0.044 | 0.583 | 0.206 | 0.885 | 0.089 |
| 1379850_at   | BI296804  | proteasome (prosome, macropain) 26S subunit, ATPase, 6                  | Psmc6            | 0.791 | 0.089 | 0.938 | 0.401 | 0.834 | 0.044 | 1.129 | 0.003 |
| 1384323_at   | BF418369  | proteasome (prosome, macropain) 26S subunit, ATPase, 6                  | Psmc6            | 0.646 | 0.134 | 1.262 | 0.018 | 0.624 | 0.003 | 1.232 | 0.058 |
| 1369992_at   | NM_031978 | proteasome (prosome, macropain) 26S subunit, non-ATPase, 1              | Psmc1            | 0.962 | 0.636 | 0.889 | 0.112 | 0.771 | 0.081 | 0.739 | 0.031 |
| 1374712_at   | AA946509  | proteasome (prosome, macropain) 26S subunit, non-ATPase, 11 (predicted) | Psmc11_predicted | 0.899 | 0.111 | 2.185 | 0.000 | 0.762 | 0.259 | 1.560 | 0.038 |
| 1376069_at   | BF414050  | Proteasome (prosome, macropain) 26S subunit, non-ATPase, 11 (predicted) | Psmc11_predicted | 0.732 | 0.290 | 1.011 | 0.353 | 0.766 | 0.003 | 1.141 | 0.015 |
| 1392983_at   | BE103250  | proteasome (prosome, macropain) 26S subunit, non-ATPase, 12             | Psmc12           | 0.876 | 0.486 | 1.556 | 0.001 | 0.789 | 0.012 | 1.394 | 0.002 |
| 1371617_at   | AI599711  | proteasome (prosome, macropain) 26S subunit, non-ATPase, 13 (predicted) | Psmc13_predicted | 0.856 | 0.491 | 1.459 | 0.010 | 0.626 | 0.041 | 1.037 | 0.262 |
| 1398858_at   | D37934    | proteasome (prosome, macropain) 26S subunit, non-ATPase, 2              | Psmc2            | 0.740 | 0.059 | 1.085 | 0.272 | 0.756 | 0.033 | 1.141 | 0.050 |
| 1388466_at   | BI285842  | proteasome (prosome, macropain) 26S subunit, non-ATPase, 3              | Psmc3            | 0.813 | 0.106 | 1.182 | 0.043 | 0.911 | 0.343 | 1.173 | 0.067 |
| 1392661_at   | AI228227  | Proteasome (prosome, macropain) 26S subunit, non-ATPase, 4              | Psmc4            | 1.177 | 0.267 | 0.783 | 0.616 | 1.253 | 0.334 | 1.305 | 0.260 |
| 1386930_at   | NM_031331 | proteasome (prosome, macropain) 26S subunit, non-ATPase, 4              | Psmc4            | 0.819 | 0.617 | 2.033 | 0.006 | 0.728 | 0.064 | 1.574 | 0.090 |
| 1372267_at   | AI233729  | proteasome (prosome, macropain) 26S subunit, non-ATPase, 5 (predicted)  | Psmc5_predicted  | 0.665 | 0.170 | 1.389 | 0.138 | 0.516 | 0.061 | 1.497 | 0.045 |
| 1371851_at   | BM383811  | proteasome (prosome, macropain) 26S subunit, non-ATPase, 6              | Psmc6            | 0.713 | 0.225 | 0.790 | 0.017 | 0.685 | 0.025 | 0.895 | 0.079 |
| 1389245_at   | BF542903  | proteasome (prosome, macropain) 26S subunit, non-ATPase, 7 (predicted)  | Psmc7_predicted  | 1.208 | 0.807 | 1.332 | 0.009 | 1.238 | 0.034 | 1.304 | 0.004 |
| 1379322_at   | BI289174  | proteasome (prosome, macropain) 26S subunit, non-ATPase, 7 (predicted)  | Psmc7_predicted  | 0.961 | 0.855 | 1.321 | 0.091 | 1.055 | 0.785 | 1.234 | 0.366 |
| 1389519_at   | BI275955  | proteasome (prosome, macropain) 26S subunit, non-ATPase, 8              | Psmc8            | 0.497 | 0.367 | 0.867 | 0.365 | 0.390 | 0.147 | 0.878 | 0.450 |

|              |           |                                                                                                |                  |       |       |        |       |        |       |        |       |
|--------------|-----------|------------------------------------------------------------------------------------------------|------------------|-------|-------|--------|-------|--------|-------|--------|-------|
| 1368184_at   | NM_130430 | proteasome (prosome, macropain) 26S subunit, non-ATPase, 9                                     | Psmc9            | 0.560 | 0.169 | 2.308  | 0.088 | 0.626  | 0.510 | 2.029  | 0.024 |
| 1367663_at   | NM_017264 | proteasome (prosome, macropain) 28 subunit, alpha                                              | Psmc1            | 2.982 | 0.005 | 3.756  | 0.005 | 3.860  | 0.001 | 4.976  | 0.000 |
| 1367710_at   | NM_017257 | proteasome (prosome, macropain) 28 subunit, beta                                               | Psmc2            | 4.772 | 0.000 | 6.032  | 0.000 | 5.999  | 0.001 | 8.536  | 0.001 |
| 1368817_at   | AI180458  | proteasome (prosome, macropain) activator subunit 4                                            | Psmc4            | 0.750 | 0.018 | 0.677  | 0.001 | 0.785  | 0.132 | 0.746  | 0.059 |
| 1368818_at   | AW531920  | proteasome (prosome, macropain) activator subunit 4                                            | Psmc4            | 0.540 | 0.165 | 0.200  | 0.000 | 0.541  | 0.012 | 0.606  | 0.101 |
| 1398778_at   | NM_017278 | proteasome (prosome, macropain) subunit, alpha type 1                                          | Psmc1            | 0.895 | 0.643 | 0.928  | 0.455 | 1.164  | 0.063 | 1.414  | 0.031 |
| 1398856_at   | AA801204  | proteasome (prosome, macropain) subunit, alpha type 2                                          | Psmc2            | 1.108 | 0.390 | 0.926  | 0.423 | 1.024  | 0.300 | 1.270  | 0.173 |
| 1368508_at   | BI294912  | proteasome (prosome, macropain) subunit, alpha type 3 /// proteasome subunit alpha type 3-like | Psmc3 /// Psmc3l | 1.055 | 0.178 | 0.866  | 0.086 | 1.117  | 0.159 | 1.081  | 0.119 |
| 1368507_at   | NM_017280 | proteasome (prosome, macropain) subunit, alpha type 3 /// proteasome subunit alpha type 3-like | Psmc3 /// Psmc3l | 0.978 | 0.420 | 1.693  | 0.032 | 0.992  | 0.247 | 2.158  | 0.017 |
| 1367837_at   | NM_017281 | proteasome (prosome, macropain) subunit, alpha type 4                                          | Psmc4            | 1.162 | 0.191 | 1.216  | 0.554 | 1.295  | 0.034 | 1.628  | 0.010 |
| 1387884_at   | AI011191  | proteasome (prosome, macropain) subunit, alpha type 5                                          | Psmc5            | 1.227 | 0.239 | 1.371  | 0.183 | 1.328  | 0.304 | 1.713  | 0.012 |
| 1369930_at   | NM_017283 | proteasome (prosome, macropain) subunit, alpha type 6                                          | Psmc6            | 1.286 | 0.102 | 1.659  | 0.012 | 1.209  | 0.045 | 1.815  | 0.007 |
| 1371869_at   | BF282262  | proteasome (prosome, macropain) subunit, alpha type 7                                          | Psmc7            | 2.171 | 0.099 | 2.519  | 0.004 | 2.143  | 0.001 | 2.715  | 0.011 |
| 1398812_at   | NM_053590 | proteasome (prosome, macropain) subunit, beta type 1                                           | Psmc1            | 1.210 | 0.219 | 1.251  | 0.124 | 1.145  | 0.283 | 1.240  | 0.080 |
| 1374033_at   | BG373505  | proteasome (prosome, macropain) subunit, beta type 10                                          | Psmc10           | 8.196 | 0.008 | 20.520 | 0.001 | 14.306 | 0.011 | 36.210 | 0.000 |
| 1398786_at   | NM_017284 | proteasome (prosome, macropain) subunit, beta type 2                                           | Psmc2            | 1.387 | 0.481 | 0.790  | 0.240 | 1.694  | 0.296 | 1.548  | 0.058 |
| 1398853_at   | AI169273  | proteasome (prosome, macropain) subunit, beta type 3                                           | Psmc3            | 0.670 | 0.309 | 0.810  | 0.098 | 0.635  | 0.150 | 1.033  | 0.661 |
| 1398831_at   | NM_031629 | proteasome (prosome, macropain) subunit, beta type 4                                           | Psmc4            | 0.987 | 0.869 | 1.114  | 0.667 | 0.813  | 0.223 | 1.056  | 0.133 |
| 1371348_at   | BI285627  | proteasome (prosome, macropain) subunit, beta type 5                                           | Psmc5            | 0.745 | 0.960 | 0.798  | 0.054 | 0.731  | 0.043 | 0.785  | 0.070 |
| 1398777_at   | NM_057099 | proteasome (prosome, macropain) subunit, beta type 6                                           | Psmc6            | 0.693 | 0.293 | 1.444  | 0.119 | 0.623  | 0.021 | 1.201  | 0.301 |
| 1367656_at   | NM_053532 | proteasome (prosome, macropain) subunit, beta type 7                                           | Psmc7            | 0.661 | 0.802 | 1.312  | 0.228 | 0.612  | 0.132 | 1.231  | 0.289 |
| 1371325_at   | BM389083  | protective protein for beta-galactosidase                                                      | Ppob             | 0.849 | 0.815 | 1.202  | 0.023 | 1.207  | 0.190 | 1.164  | 0.645 |
| 1371449_at   | BM388765  | protein (peptidyl-prolyl cis/trans isomerase) NIMA-interacting 1 (predicted)                   | Pin1_predicted   | 0.570 | 0.021 | 1.072  | 0.875 | 0.678  | 0.146 | 1.096  | 0.692 |
| 1399048_at   | BI274121  | protein arginine N-methyltransferase 4                                                         | Prmt4            | 0.450 | 0.316 | 1.175  | 0.041 | 0.595  | 0.049 | 0.808  | 0.045 |
| 1374424_at   | BE112720  | protein arginine N-methyltransferase 5 (predicted)                                             | Prmt5_predicted  | 0.584 | 0.000 | 0.864  | 0.381 | 0.651  | 0.009 | 0.921  | 0.534 |
| 1375388_at   | BF400832  | Protein disulfide isomerase associated 3                                                       | Pdia3            | 1.648 | 0.098 | 2.422  | 0.036 | 1.447  | 0.025 | 1.738  | 0.148 |
| 1398788_at   | NM_017319 | protein disulfide isomerase associated 3                                                       | Pdia3            | 1.033 | 0.843 | 0.984  | 0.755 | 1.119  | 0.792 | 1.087  | 0.793 |
| 1370007_at   | NM_053849 | protein disulfide isomerase associated 4                                                       | Pdia4            | 0.995 | 0.736 | 0.860  | 0.040 | 1.753  | 0.947 | 0.618  | 0.059 |
| 1378532_at   | AI407172  | Protein disulfide isomerase associated 4                                                       | Pdia4            | 1.004 | 0.744 | 12.428 | 0.000 | 0.734  | 0.003 | 2.095  | 0.170 |
| 1370859_at   | BI284965  | protein disulfide isomerase associated 6                                                       | Pdia6            | 0.672 | 0.170 | 0.782  | 0.024 | 0.769  | 0.256 | 0.810  | 0.042 |
| 1374828_at   | AI045590  | protein disulfide isomerase-associated 5                                                       | Pdia5            | 0.948 | 0.291 | 1.689  | 0.157 | 1.073  | 0.688 | 1.248  | 0.088 |
| 1369285_at   | NM_031082 | protein geranylgeranyltransferase type I, beta subunit                                         | Pggt1b           | 1.412 | 0.278 | 1.892  | 0.132 | 0.995  | 0.145 | 2.960  | 0.157 |
| 1382191_at   | AI228848  | protein inhibitor of activated STAT 1 (predicted)                                              | Pias1_predicted  | 1.783 | 0.019 | 1.579  | 0.020 | 1.203  | 0.018 | 1.493  | 0.160 |
| 1370196_at   | AW532051  | protein inhibitor of activated STAT 3                                                          | Pias3            | 0.962 | 0.929 | 2.454  | 0.000 | 1.020  | 0.436 | 1.253  | 0.148 |
| 1372857_at   | AI407930  | protein kinase C and casein kinase substrate in neurons 2                                      | Pacsin2          | 1.195 | 0.629 | 1.481  | 0.151 | 0.733  | 0.101 | 1.372  | 0.163 |
| 1368068_a_at | NM_130740 | protein kinase C and casein kinase substrate in neurons 2                                      | Pacsin2          | 1.085 | 0.791 | 1.825  | 0.006 | 0.892  | 0.507 | 1.463  | 0.215 |
| 1390305_at   | AI599263  | protein kinase C binding protein 1                                                             | Prkcbp1          | 1.193 | 0.259 | 0.604  | 0.041 | 1.077  | 0.866 | 1.034  | 0.844 |
| 1396148_at   | BE106782  | Protein kinase C binding protein 1                                                             | Prkcbp1          | 0.810 | 0.364 | 0.464  | 0.025 | 0.753  | 0.043 | 0.498  | 0.149 |
| 1388371_at   | AI008784  | Protein kinase C substrate 80K-H (predicted)                                                   | Prkch_predicted  | 0.704 | 0.109 | 0.895  | 0.277 | 0.813  | 0.591 | 0.961  | 0.823 |
| 1372176_at   | BF415343  | protein kinase C, alpha                                                                        | Prkca            | 0.962 | 0.912 | 7.665  | 0.014 | 0.470  | 0.020 | 3.726  | 0.046 |
| 1370585_a_at | X04440    | protein kinase C, beta 1                                                                       | Prkcb1           | 0.685 | 0.259 | 0.301  | 0.009 | 0.526  | 0.154 | 0.252  | 0.013 |
| 1397006_at   | BF401586  | Protein kinase C, beta 1                                                                       | Prkcb1           | 1.001 | 0.979 | 0.997  | 0.290 | 1.670  | 0.050 | 0.974  | 0.840 |
| 1387114_at   | NM_133307 | protein kinase C, delta                                                                        | Prkcd            | 2.136 | 0.035 | 2.865  | 0.011 | 4.330  | 0.012 | 2.357  | 0.008 |
| 1367691_at   | NM_134449 | protein kinase C, delta binding protein                                                        | Prkcdp           | 1.469 | 0.038 | 0.997  | 0.989 | 1.004  | 0.961 | 0.967  | 0.547 |
| 1378644_at   | BI301465  | Protein kinase C, epsilon                                                                      | Prkce            | 1.178 | 0.663 | 0.872  | 0.480 | 0.986  | 0.820 | 1.037  | 0.495 |
| 1374593_at   | AA799421  | protein kinase C, epsilon                                                                      | Prkce            | 1.055 | 0.947 | 1.024  | 0.815 | 1.095  | 0.741 | 1.008  | 0.372 |
| 1378385_at   | AI548474  | Protein kinase C, eta                                                                          | Prkch            | 2.329 | 0.485 | 0.529  | 0.369 | 1.587  | 0.247 | 0.432  | 0.145 |
| 1369089_at   | NM_012628 | protein kinase C, gamma                                                                        | Prkcc            | 1.075 | 0.481 | 1.019  | 0.855 | 1.037  | 0.969 | 0.989  | 0.367 |
| 1373047_at   | BF284699  | Protein kinase C, iota                                                                         | Prkci            | 1.206 | 0.608 | 1.404  | 0.064 | 1.161  | 0.639 | 1.225  | 0.158 |
| 1371203_at   | AB020615  | protein kinase C, iota                                                                         | Prkci            | 0.999 | 0.650 | 1.156  | 0.461 | 0.926  | 0.792 | 0.759  | 0.690 |
| 1370197_a_at | AW533298  | protein kinase C, zeta                                                                         | Prkcz            | 0.441 | 0.316 | 1.220  | 0.989 | 1.041  | 0.328 | 1.066  | 0.994 |
| 1396906_at   | BE105377  | Protein kinase C, zeta                                                                         | Prkcz            | 1.080 | 0.373 | 0.995  | 0.643 | 0.500  | 0.248 | 1.205  | 0.999 |
| 1386966_a_at | NM_021764 | protein kinase C-binding protein Beta15                                                        | Pkcbp15          | 1.171 | 0.173 | 1.051  | 0.515 | 1.387  | 0.829 | 1.045  | 0.614 |
| 1372995_at   | AI703715  | protein kinase D2                                                                              | Prkd2            | 1.339 | 0.482 | 1.757  | 0.239 | 1.867  | 0.112 | 1.518  | 0.214 |
| 1387398_at   | AA996685  | protein kinase inhibitor, alpha                                                                | Pkia             | 2.533 | 0.015 | 1.963  | 0.015 | 1.317  | 0.351 | 1.704  | 0.134 |
| 1378510_at   | BF386239  | Protein kinase inhibitor, gamma                                                                | Pkig             | 1.594 | 0.075 | 1.631  | 0.228 | 1.780  | 0.008 | 2.181  | 0.223 |
| 1371600_at   | AA943815  | protein kinase inhibitor, gamma                                                                | Pkig             | 1.394 | 0.146 | 1.768  | 0.000 | 1.759  | 0.081 | 1.808  | 0.010 |
| 1398400_at   | AW433595  | protein kinase LYK5                                                                            | Lyk5             | 0.671 | 0.358 | 0.447  | 0.004 | 0.528  | 0.226 | 0.890  | 0.837 |
| 1386992_at   | NM_017175 | protein kinase N1                                                                              | Pkn1             | 1.251 | 0.323 | 2.347  | 0.029 | 1.021  | 0.423 | 1.945  | 0.019 |
| 1393055_at   | BF525244  | protein kinase N2                                                                              | Pkn2             | 1.130 | 0.242 | 1.312  | 0.146 | 1.172  | 0.044 | 1.218  | 0.198 |
| 1369104_at   | NM_019142 | protein kinase, AMP-activated, alpha 1 catalytic subunit                                       | Prkaa1           | 1.048 | 0.106 | 4.799  | 0.027 | 1.004  | 0.064 | 1.150  | 0.757 |

|              |           |                                                                              |                    |       |       |       |       |       |       |       |       |
|--------------|-----------|------------------------------------------------------------------------------|--------------------|-------|-------|-------|-------|-------|-------|-------|-------|
| 1386945_a_at | NM_031976 | protein kinase, AMP-activated, beta 1 non-catalytic subunit                  | Prkab1             | 1.003 | 0.672 | 1.534 | 0.006 | 1.040 | 0.781 | 1.113 | 0.366 |
| 1369271_at   | NM_022627 | protein kinase, AMP-activated, beta 2 non-catalytic subunit                  | Prkab2             | 1.005 | 0.920 | 1.200 | 0.095 | 1.002 | 0.968 | 0.996 | 0.107 |
| 1376724_at   | AI170671  | Protein kinase, AMP-activated, beta 2 non-catalytic subunit                  | Prkab2             | 0.995 | 0.975 | 1.484 | 0.470 | 0.906 | 0.619 | 1.397 | 0.870 |
| 1367947_at   | U42413    | protein kinase, AMP-activated, gamma 1 non-catalytic subunit                 | Prkag1             | 0.556 | 0.024 | 0.701 | 0.002 | 0.725 | 0.362 | 0.817 | 0.211 |
| 1373952_at   | AI409841  | protein kinase, AMP-activated, gamma 2 non-catalytic subunit                 | Prkag2             | 1.119 | 0.538 | 1.564 | 0.082 | 1.226 | 0.424 | 1.487 | 0.077 |
| 1373951_at   | AI407792  | Protein kinase, cAMP dependent regulatory, type I, alpha                     | Prkar1a            | 0.759 | 0.170 | 0.558 | 0.000 | 0.766 | 0.448 | 0.645 | 0.001 |
| 1388375_at   | AI234096  | Protein kinase, cAMP dependent regulatory, type I, alpha                     | Prkar1a            | 0.737 | 0.299 | 0.432 | 0.003 | 0.659 | 0.017 | 0.447 | 0.024 |
| 1386905_at   | NM_013181 | protein kinase, cAMP dependent regulatory, type I, alpha                     | Prkar1a            | 0.807 | 0.809 | 1.082 | 0.246 | 0.675 | 0.063 | 0.945 | 0.195 |
| 1389463_at   | BG375376  | protein kinase, cAMP dependent regulatory, type I, beta                      | Prkar1b            | 0.741 | 0.158 | 1.144 | 0.200 | 0.461 | 0.001 | 0.833 | 0.187 |
| 1371133_a_at | M12492    | protein kinase, cAMP dependent regulatory, type II beta                      | Prkar2b            | 0.913 | 0.593 | 0.807 | 0.034 | 0.584 | 0.014 | 0.933 | 0.267 |
| 1371835_at   | AI411907  | protein kinase, cAMP dependent, catalytic, beta (predicted)                  | Prkacb_predicted   | 0.594 | 0.111 | 0.520 | 0.002 | 0.497 | 0.000 | 0.504 | 0.003 |
| 1384772_at   | BF400907  | protein kinase, cAMP dependent, catalytic, beta (predicted)                  | Prkacb_predicted   | 0.546 | 0.167 | 0.928 | 0.737 | 0.397 | 0.077 | 0.895 | 0.388 |
| 1371578_at   | AW915101  | protein kinase, cAMP-dependent, catalytic, alpha                             | Prkaca             | 0.510 | 0.396 | 0.423 | 0.007 | 0.387 | 0.022 | 0.392 | 0.002 |
| 1395246_at   | AI104783  | Protein kinase, cAMP-dependent, regulatory, type 2, alpha                    | Prkar2a            | 1.478 | 0.018 | 1.143 | 0.285 | 0.728 | 0.070 | 0.721 | 0.324 |
| 1373400_at   | AW918535  | Protein kinase, cAMP-dependent, regulatory, type 2, alpha                    | Prkar2a            | 0.955 | 0.400 | 0.930 | 0.626 | 0.825 | 0.085 | 1.040 | 0.688 |
| 1378415_at   | BM386879  | Protein kinase, cAMP-dependent, regulatory, type 2, alpha                    | Prkar2a            | 1.610 | 0.723 | 1.082 | 0.442 | 1.004 | 0.982 | 1.000 | 0.971 |
| 1397018_at   | BF399590  | Protein kinase, cGMP-dependent, type 1 (mapped)                              | Prkg1_mapped       | 1.048 | 0.739 | 0.957 | 0.245 | 1.218 | 0.259 | 1.086 | 0.796 |
| 1389431_at   | BF400782  | protein kinase, DNA activated, catalytic polypeptide (predicted)             | Prkdc_predicted    | 0.603 | 0.017 | 0.689 | 0.050 | 0.632 | 0.013 | 0.794 | 0.388 |
| 1371899_at   | AI102009  | protein kinase, interferon inducible double stranded RNA dependent activator | Prkra              | 0.591 | 0.057 | 0.420 | 0.015 | 1.018 | 0.967 | 0.639 | 0.067 |
| 1387242_at   | NM_019335 | Protein kinase, interferon-inducible double stranded RNA dependent           | Prkr               | 4.060 | 0.001 | 1.473 | 0.077 | 9.644 | 0.001 | 2.478 | 0.020 |
| 1396919_at   | AI137384  | protein kinase, lysine deficient 1                                           | Prkwk1             | 1.078 | 0.043 | 1.105 | 0.996 | 1.154 | 0.163 | 1.101 | 0.799 |
| 1378686_at   | BF405626  | Protein kinase, lysine deficient 1                                           | Prkwk1             | 0.871 | 0.320 | 1.118 | 0.998 | 0.617 | 0.167 | 0.880 | 0.992 |
| 1387072_at   | NM_053794 | protein kinase, lysine deficient 1                                           | Prkwk1             | 1.248 | 0.383 | 2.564 | 0.010 | 1.026 | 0.889 | 1.950 | 0.009 |
| 1372791_at   | AI235474  | Protein kinase, lysine deficient 1                                           | Prkwk1             | 0.896 | 0.542 | 0.436 | 0.001 | 0.682 | 0.102 | 0.509 | 0.005 |
| 1394729_at   | AI714037  | Protein kinase, lysine deficient 1                                           | Prkwk1             | 1.415 | 0.900 | 0.966 | 0.856 | 1.317 | 0.377 | 0.996 | 0.977 |
| 1392626_at   | BE110801  | protein kinase, membrane associated tyrosine/threonine 1 (predicted)         | Pkmyt1_predicted   | 0.991 | 0.823 | 1.492 | 0.036 | 1.002 | 0.991 | 1.010 | 0.322 |
| 1389686_at   | BF408898  | protein kinase, X-linked                                                     | Prkx               | 1.053 | 0.233 | 0.841 | 0.151 | 1.092 | 0.628 | 1.173 | 0.101 |
| 1398143_at   | BF414789  | protein kinase, X-linked                                                     | Prkx               | 0.998 | 0.683 | 1.036 | 0.082 | 1.007 | 0.307 | 1.097 | 0.613 |
| 1388717_at   | BM384163  | protein O-fucosyltransferase 2 (predicted)                                   | Pofut2_predicted   | 0.259 | 0.009 | 0.345 | 0.004 | 0.357 | 0.005 | 0.322 | 0.008 |
| 1374538_at   | AW915001  | protein O-linked mannose beta1,2-N-acetylglucosaminyltransferase             | Pomgnt1            | 0.569 | 0.093 | 0.624 | 0.002 | 0.627 | 0.102 | 0.686 | 0.078 |
| 1380239_at   | BE106083  | Protein phosphatase 1 (formerly 2C)-like (predicted)                         | Ppm1l_predicted    | 1.364 | 0.018 | 0.968 | 0.901 | 1.427 | 0.027 | 0.971 | 0.945 |
| 1386863_at   | NM_031527 | protein phosphatase 1, catalytic subunit, alpha isoform                      | Ppp1ca             | 0.702 | 0.231 | 0.840 | 0.027 | 0.548 | 0.006 | 0.790 | 0.001 |
| 1386950_at   | NM_013065 | protein phosphatase 1, catalytic subunit, beta isoform                       | Ppp1cb             | 0.729 | 0.102 | 0.928 | 0.259 | 0.728 | 0.333 | 0.933 | 0.963 |
| 1392730_at   | AI144948  | Protein phosphatase 1, catalytic subunit, beta isoform                       | Ppp1cb             | 1.195 | 0.824 | 1.264 | 0.328 | 1.166 | 0.706 | 1.279 | 0.246 |
| 1367637_a_at | NM_022498 | protein phosphatase 1, catalytic subunit, gamma isoform                      | Ppp1cc             | 1.016 | 0.732 | 0.621 | 0.000 | 1.211 | 0.058 | 0.873 | 0.155 |
| 1382307_at   | BF406594  | protein phosphatase 1, regulatory (inhibitor) subunit 12A                    | Ppp1r12a           | 1.120 | 0.191 | 1.981 | 0.098 | 0.678 | 0.544 | 1.138 | 0.644 |
| 1380311_at   | AI535528  | Protein phosphatase 1, regulatory (inhibitor) subunit 12A                    | Ppp1r12a           | 1.100 | 0.820 | 0.987 | 0.871 | 0.972 | 0.766 | 0.980 | 0.661 |
| 1389815_at   | BF547738  | protein phosphatase 1, regulatory (inhibitor) subunit 14B                    | Ppp1r14b           | 0.643 | 0.219 | 1.341 | 0.086 | 0.387 | 0.009 | 1.000 | 0.140 |
| 1375104_at   | AI408517  | Protein phosphatase 1, regulatory (inhibitor) subunit 14B                    | Ppp1r14b           | 0.702 | 0.617 | 1.316 | 0.057 | 0.452 | 0.008 | 1.010 | 0.423 |
| 1393082_at   | AI044747  | protein phosphatase 1, regulatory (inhibitor) subunit 14c                    | Ppp1r14c           | 3.029 | 0.009 | 1.571 | 0.057 | 4.369 | 0.004 | 2.121 | 0.013 |
| 1368716_at   | NM_133425 | protein phosphatase 1, regulatory (inhibitor) subunit 14c                    | Ppp1r14c           | 2.509 | 0.043 | 2.996 | 0.010 | 2.561 | 0.014 | 2.267 | 0.009 |
| 1384729_at   | BI280301  | protein phosphatase 1, regulatory (inhibitor) subunit 15b (predicted)        | Ppp1r15b_predicted | 1.001 | 0.831 | 1.109 | 0.362 | 0.977 | 0.747 | 1.030 | 0.603 |
| 1386968_at   | NM_022676 | protein phosphatase 1, regulatory (inhibitor) subunit 1A                     | Ppp1r1a            | 0.286 | 0.000 | 0.214 | 0.000 | 0.271 | 0.000 | 0.257 | 0.008 |
| 1383191_at   | BE097583  | protein phosphatase 1, regulatory (inhibitor) subunit 1A                     | Ppp1r1a            | 0.290 | 0.001 | 0.112 | 0.000 | 0.243 | 0.002 | 0.216 | 0.009 |
| 1383180_at   | BF288097  | protein phosphatase 1, regulatory (inhibitor) subunit 2                      | Ppp1r2             | 0.637 | 0.571 | 0.910 | 0.066 | 1.006 | 0.967 | 0.919 | 0.761 |
| 1372446_at   | AI172276  | protein phosphatase 1, regulatory (inhibitor) subunit 2                      | Ppp1r2             | 0.768 | 0.607 | 0.776 | 0.025 | 0.879 | 0.907 | 0.985 | 0.463 |
| 1393480_at   | AW919998  | protein phosphatase 1, regulatory (inhibitor) subunit 2                      | Ppp1r2             | 0.795 | 0.990 | 0.927 | 0.473 | 0.761 | 0.059 | 1.151 | 0.380 |
| 1384262_at   | BI274037  | protein phosphatase 1, regulatory (inhibitor) subunit 3B                     | Ppp1r3b            | 1.557 | 0.143 | 2.270 | 0.022 | 0.880 | 0.495 | 1.320 | 0.291 |
| 1373108_at   | BM390827  | protein phosphatase 1, regulatory (inhibitor) subunit 3C                     | Ppp1r3c            | 1.002 | 0.959 | 3.188 | 0.042 | 1.191 | 0.782 | 2.093 | 0.011 |
| 1374510_at   | BI296300  | Protein phosphatase 1, regulatory (inhibitor) subunit 3F (predicted)         | Ppp1r3f_predicted  | 1.277 | 0.207 | 1.492 | 0.333 | 1.190 | 0.041 | 1.264 | 0.289 |
| 1383277_at   | H32309    | protein phosphatase 1, regulatory (inhibitor) subunit 7                      | Ppp1r7             | 0.576 | 0.171 | 1.063 | 0.155 | 0.473 | 0.116 | 0.938 | 0.496 |
| 1376566_at   | BE109552  | Protein phosphatase 1, regulatory (inhibitor) subunit 7                      | Ppp1r7             | 1.023 | 0.183 | 0.975 | 0.969 | 1.004 | 0.978 | 1.003 | 0.992 |
| 1373073_at   | BF282816  | protein phosphatase 1, regulatory (inhibitor) subunit 7                      | Ppp1r7             | 1.003 | 0.511 | 1.225 | 0.516 | 1.002 | 0.986 | 1.213 | 0.275 |
| 1373437_at   | BI286565  | Protein phosphatase 1, regulatory (inhibitor) subunit 8 (predicted)          | Ppp1r8_predicted   | 1.226 | 0.979 | 1.444 | 0.052 | 0.306 | 0.087 | 1.413 | 0.167 |
| 1386971_at   | NM_022951 | protein phosphatase 1, regulatory subunit 10                                 | Ppp1r10            | 0.592 | 0.017 | 0.258 | 0.002 | 0.835 | 0.018 | 0.497 | 0.019 |
| 1387143_at   | NM_053474 | protein phosphatase 1, regulatory subunit 9B                                 | Ppp1r9b            | 1.165 | 0.199 | 0.809 | 0.194 | 1.256 | 0.337 | 0.752 | 0.088 |
| 1383475_at   | AW521250  | Protein phosphatase 1A, magnesium dependent, alpha isoform                   | Ppm1a              | 1.135 | 0.335 | 1.724 | 0.001 | 0.736 | 0.109 | 1.326 | 0.047 |
| 1368859_at   | NM_017038 | protein phosphatase 1A, magnesium dependent, alpha isoform                   | Ppm1a              | 1.002 | 0.466 | 1.282 | 0.459 | 1.058 | 0.866 | 1.165 | 0.406 |
| 1371136_at   | AJ271834  | protein phosphatase 1B, magnesium dependent, beta isoform                    | Ppm1b              | 0.838 | 0.014 | 1.823 | 0.021 | 0.765 | 0.050 | 1.387 | 0.002 |
| 1398807_at   | NM_033096 | protein phosphatase 1B, magnesium dependent, beta isoform                    | Ppm1b              | 0.498 | 0.222 | 0.585 | 0.004 | 0.479 | 0.001 | 0.717 | 0.007 |
| 1378124_at   | AI501282  | protein phosphatase 1B, magnesium dependent, beta isoform                    | Ppm1b              | 1.385 | 0.276 | 2.122 | 0.005 | 1.625 | 0.099 | 1.569 | 0.038 |

|              |           |                                                                                                                       |                   |       |       |       |       |       |       |       |       |
|--------------|-----------|-----------------------------------------------------------------------------------------------------------------------|-------------------|-------|-------|-------|-------|-------|-------|-------|-------|
| 1388514_at   | BI285247  | protein phosphatase 1G (formerly 2C), magnesium-dependent, gamma isoform                                              | Ppm1g             | 0.752 | 0.271 | 1.427 | 0.006 | 0.698 | 0.043 | 1.304 | 0.114 |
| 1390954_at   | AI548159  | protein phosphatase 1H (PP2C domain containing)                                                                       | Ppm1h             | 0.961 | 0.955 | 2.078 | 0.006 | 0.520 | 0.045 | 1.799 | 0.270 |
| 1388805_at   | BF408792  | Protein phosphatase 2 (formerly 2A), catalytic subunit, alpha isoform                                                 | Ppp2ca            | 0.940 | 0.194 | 2.532 | 0.003 | 0.773 | 0.227 | 1.600 | 0.005 |
| 1398790_at   | NM_017039 | protein phosphatase 2 (formerly 2A), catalytic subunit, alpha isoform                                                 | Ppp2ca            | 1.017 | 0.881 | 1.588 | 0.004 | 0.882 | 0.938 | 1.526 | 0.014 |
| 1367827_at   | NM_017040 | protein phosphatase 2 (formerly 2A), catalytic subunit, beta isoform                                                  | Ppp2cb            | 0.923 | 0.926 | 1.390 | 0.071 | 0.965 | 0.925 | 1.551 | 0.015 |
| 1375245_at   | AA800669  | protein phosphatase 2 (formerly 2A), regulatory subunit A (PR 65), alpha isoform                                      | Ppp2r1a           | 0.701 | 0.503 | 1.070 | 0.523 | 0.461 | 0.075 | 0.953 | 0.612 |
| 1397689_at   | BF288445  | Protein phosphatase 2 (formerly 2A), regulatory subunit A (PR 65), alpha isoform                                      | Ppp2r1a           | 1.034 | 0.937 | 1.333 | 0.811 | 1.686 | 0.369 | 1.091 | 0.808 |
| 1373959_at   | AI411788  | protein phosphatase 2 (formerly 2A), regulatory subunit A (PR 65), beta isoform                                       | Ppp2r1b           | 1.149 | 0.546 | 1.388 | 0.031 | 0.883 | 0.501 | 1.185 | 0.016 |
| 1392741_at   | AI145364  | Protein phosphatase 2 (formerly 2A), regulatory subunit B (PR 52), alpha isoform                                      | Ppp2r2a           | 1.501 | 0.088 | 1.816 | 0.854 | 1.131 | 0.161 | 0.993 | 0.261 |
| 1376938_at   | AI717081  | Protein phosphatase 2 (formerly 2A), regulatory subunit B (PR 52), alpha isoform                                      | Ppp2r2a           | 1.074 | 0.107 | 1.587 | 0.110 | 1.034 | 0.884 | 0.904 | 0.756 |
| 1387485_a_at | M83297    | protein phosphatase 2 (formerly 2A), regulatory subunit B (PR 52), alpha isoform                                      | Ppp2r2a           | 1.266 | 0.570 | 1.500 | 0.064 | 1.048 | 0.818 | 1.170 | 0.529 |
| 1395410_at   | AI717707  | protein phosphatase 2 (formerly 2A), regulatory subunit B", alpha                                                     | Ppp2r3a           | 1.311 | 0.246 | 1.104 | 0.874 | 1.217 | 0.032 | 1.289 | 0.288 |
| 1399005_at   | BG673380  | protein phosphatase 2, regulatory subunit B (B56), alpha isoform (predicted)                                          | Ppp2r5a_predicted | 0.625 | 0.000 | 1.044 | 0.773 | 0.622 | 0.117 | 0.950 | 0.727 |
| 1392241_at   | AW252634  | Protein phosphatase 2, regulatory subunit B (B56), alpha isoform (predicted)                                          | Ppp2r5a_predicted | 0.987 | 0.338 | 0.998 | 0.921 | 0.942 | 0.347 | 1.026 | 0.997 |
| 1377235_a_at | BI281643  | protein phosphatase 2, regulatory subunit B (B56), beta isoform                                                       | Ppp2r5b           | 1.842 | 0.031 | 1.314 | 0.201 | 3.224 | 0.006 | 1.045 | 0.580 |
| 1372609_at   | AI236198  | protein phosphatase 2, regulatory subunit B (B56), delta isoform                                                      | Ppp2r5d           | 0.591 | 0.181 | 1.657 | 0.193 | 0.856 | 0.035 | 1.140 | 0.642 |
| 1395502_at   | BF557865  | protein phosphatase 2, regulatory subunit B (B56), delta isoform                                                      | Ppp2r5d           | 0.999 | 0.613 | 1.259 | 0.150 | 0.938 | 0.796 | 1.050 | 0.214 |
| 1395826_at   | BG664036  | protein phosphatase 2, regulatory subunit B (B56), epsilon isoform (predicted)                                        | Ppp2r5e_predicted | 0.676 | 0.081 | 0.801 | 0.424 | 0.679 | 0.080 | 0.521 | 0.270 |
| 1388965_at   | AI144583  | protein phosphatase 2, regulatory subunit B (B56), epsilon isoform (predicted)                                        | Ppp2r5e_predicted | 0.840 | 0.729 | 0.823 | 0.280 | 0.528 | 0.024 | 0.670 | 0.007 |
| 1388107_at   | BF282131  | protein phosphatase 2, regulatory subunit B, delta isoform                                                            | Ppp2r2d           | 1.132 | 0.443 | 1.422 | 0.008 | 0.812 | 0.116 | 1.032 | 0.305 |
| 1368910_at   | NM_019372 | protein phosphatase 2C, magnesium dependent, catalytic subunit                                                        | Ppm2c             | 1.171 | 0.499 | 1.007 | 0.506 | 1.274 | 0.295 | 0.996 | 0.488 |
| 1379175_at   | BF388224  | Protein phosphatase 3, catalytic subunit, alpha isoform                                                               | Ppp3ca            | 0.628 | 0.027 | 1.094 | 0.675 | 2.552 | 0.208 | 1.003 | 0.070 |
| 1384815_at   | AI145507  | Protein phosphatase 3, catalytic subunit, alpha isoform                                                               | Ppp3ca            | 0.997 | 0.281 | 2.123 | 0.047 | 0.945 | 0.438 | 1.063 | 0.101 |
| 1373479_at   | BE113127  | Protein phosphatase 3, catalytic subunit, alpha isoform                                                               | Ppp3ca            | 0.916 | 0.586 | 0.843 | 0.026 | 0.885 | 0.557 | 0.840 | 0.046 |
| 1368277_at   | NM_017041 | protein phosphatase 3, catalytic subunit, alpha isoform                                                               | Ppp3ca            | 0.965 | 0.593 | 0.916 | 0.145 | 0.890 | 0.305 | 1.087 | 0.003 |
| 1383415_at   | AW531415  | Protein phosphatase 3, catalytic subunit, alpha isoform                                                               | Ppp3ca            | 0.932 | 0.840 | 0.723 | 0.060 | 0.949 | 0.885 | 0.665 | 0.074 |
| 1387261_at   | NM_017042 | protein phosphatase 3, catalytic subunit, beta isoform                                                                | Ppp3cb            | 2.012 | 0.139 | 0.530 | 0.128 | 1.185 | 0.815 | 0.842 | 0.285 |
| 1375882_at   | BG380745  | protein phosphatase 3, catalytic subunit, beta isoform                                                                | Ppp3cb            | 1.284 | 0.231 | 0.731 | 0.018 | 1.142 | 0.296 | 0.820 | 0.076 |
| 1398469_at   | BG372864  | protein phosphatase 3, catalytic subunit, gamma isoform                                                               | Ppp3cc            | 1.022 | 0.218 | 1.551 | 0.132 | 0.990 | 0.525 | 1.337 | 0.244 |
| 1372982_at   | BF387153  | protein phosphatase 3, regulatory subunit B, alpha isoform (calcineurin B, type I)                                    | Ppp3r1            | 0.984 | 0.404 | 1.125 | 0.154 | 1.037 | 0.755 | 1.214 | 0.063 |
| 1390333_at   | AA957050  | protein phosphatase 4, catalytic subunit                                                                              | Ppp4c             | 1.396 | 0.962 | 1.683 | 0.109 | 0.948 | 0.580 | 1.229 | 0.394 |
| 1370162_at   | BI285346  | protein phosphatase 4, regulatory subunit 1                                                                           | Ppp4r1            | 1.323 | 0.017 | 1.122 | 0.399 | 1.149 | 0.291 | 1.000 | 0.992 |
| 1387858_at   | AI535053  | protein phosphatase 4, regulatory subunit 1                                                                           | Ppp4r1            | 1.036 | 0.125 | 0.998 | 0.983 | 1.000 | 0.996 | 1.000 | 0.865 |
| 1388865_at   | BG378896  | protein phosphatase 4, regulatory subunit 2 (predicted)                                                               | Ppp4r2_predicted  | 1.318 | 0.244 | 1.602 | 0.029 | 0.950 | 0.520 | 1.207 | 0.663 |
| 1392997_at   | BF556742  | protein phosphatase 4, regulatory subunit 2 (predicted)                                                               | Ppp4r2_predicted  | 1.168 | 0.495 | 1.257 | 0.026 | 0.975 | 0.497 | 1.022 | 0.868 |
| 1393231_at   | BM386467  | protein phosphatase 4, regulatory subunit 2 (predicted)                                                               | Ppp4r2_predicted  | 1.181 | 0.856 | 0.481 | 0.001 | 0.947 | 0.783 | 0.689 | 0.002 |
| 1387801_at   | NM_133589 | protein phosphatase 6, catalytic subunit                                                                              | Ppp6c             | 0.641 | 0.118 | 1.701 | 0.012 | 0.728 | 0.005 | 1.520 | 0.042 |
| 1373844_at   | BE103921  | protein phosphatase methylesterase 1                                                                                  | Ppme1             | 0.629 | 0.164 | 1.017 | 0.364 | 0.929 | 0.768 | 0.867 | 0.352 |
| 1371037_at   | U06230    | protein S (alpha)                                                                                                     | Pros1             | 1.514 | 0.128 | 1.306 | 0.145 | 1.385 | 0.125 | 0.973 | 0.263 |
| 1390288_at   | AI013362  | protein serine kinase H1 (predicted)                                                                                  | Pskh1_predicted   | 0.881 | 0.652 | 0.327 | 0.017 | 0.684 | 0.027 | 0.575 | 0.042 |
| 1369688_s_at | U69109    | protein tyrosine kinase 2 beta                                                                                        | Ptk2b             | 2.107 | 0.016 | 0.673 | 0.048 | 2.137 | 0.063 | 0.501 | 0.020 |
| 1371644_at   | BF283086  | protein tyrosine kinase 9                                                                                             | Ptk9              | 1.138 | 0.659 | 1.022 | 0.630 | 1.150 | 0.989 | 0.827 | 0.515 |
| 1370193_at   | AI172261  | protein tyrosine phosphatase 4a1                                                                                      | Ptp4a1            | 1.329 | 0.023 | 3.904 | 0.000 | 0.776 | 0.505 | 2.674 | 0.000 |
| 1367971_at   | NM_053475 | protein tyrosine phosphatase 4a2                                                                                      | Ptp4a2            | 1.336 | 0.100 | 1.577 | 0.010 | 1.020 | 0.745 | 1.455 | 0.031 |
| 1372084_at   | AI104546  | protein tyrosine phosphatase 4a3 (predicted)                                                                          | Ptp4a3_predicted  | 0.623 | 0.188 | 0.343 | 0.001 | 0.320 | 0.050 | 0.263 | 0.000 |
| 1368516_at   | NM_012763 | protein tyrosine phosphatase alpha                                                                                    | LOC360370         | 0.630 | 0.693 | 0.719 | 0.083 | 0.947 | 0.238 | 0.704 | 0.017 |
| 1392940_at   | BE095915  | Protein tyrosine phosphatase domain containing 1 (predicted)                                                          | Ptpdc1_predicted  | 0.581 | 0.133 | 0.746 | 0.324 | 0.604 | 0.151 | 2.094 | 0.948 |
| 1388379_at   | AI172465  | Protein tyrosine phosphatase, non-receptor type 11                                                                    | Ptpn11            | 1.446 | 0.257 | 1.724 | 0.006 | 1.052 | 0.644 | 1.690 | 0.006 |
| 1373065_at   | AW916153  | protein tyrosine phosphatase, non-receptor type 18                                                                    | Ptpn18            | 1.001 | 0.553 | 1.000 | 0.889 | 1.410 | 0.272 | 1.045 | 0.485 |
| 1368361_a_at | NM_053990 | protein tyrosine phosphatase, non-receptor type 2                                                                     | Ptpn2             | 1.618 | 0.053 | 2.425 | 0.003 | 2.160 | 0.002 | 2.261 | 0.005 |
| 1368087_a_at | NM_133545 | protein tyrosine phosphatase, non-receptor type 21                                                                    | Ptpn21            | 4.219 | 0.000 | 3.252 | 0.007 | 3.919 | 0.003 | 4.694 | 0.010 |
| 1370473_a_at | AF077000  | protein tyrosine phosphatase, non-receptor type 23                                                                    | Ptpn23            | 2.054 | 0.056 | 4.438 | 0.003 | 2.026 | 0.071 | 2.767 | 0.003 |
| 1389362_at   | AI317821  | protein tyrosine phosphatase, non-receptor type 3                                                                     | Ptpn3             | 3.623 | 0.006 | 4.472 | 0.002 | 1.802 | 0.030 | 2.646 | 0.009 |
| 1368010_at   | NM_053908 | protein tyrosine phosphatase, non-receptor type 6                                                                     | Ptpn6             | 0.999 | 0.967 | 0.918 | 0.250 | 0.965 | 0.764 | 1.084 | 0.448 |
| 1367881_at   | NM_013016 | protein tyrosine phosphatase, non-receptor type substrate 1                                                           | Ptpns1            | 0.890 | 0.632 | 0.802 | 0.091 | 0.630 | 0.077 | 0.524 | 0.009 |
| 1387901_at   | L19180    | protein tyrosine phosphatase, receptor type, D                                                                        | Ptprd             | 0.677 | 0.004 | 0.366 | 0.012 | 0.547 | 0.002 | 0.404 | 0.044 |
| 1380738_at   | BM392254  | Protein tyrosine phosphatase, receptor type, D                                                                        | Ptprd             | 1.033 | 0.965 | 0.996 | 0.729 | 0.999 | 0.998 | 1.010 | 0.935 |
| 1368035_a_at | X83505    | protein tyrosine phosphatase, receptor type, F                                                                        | Ptprf             | 1.330 | 0.408 | 0.850 | 0.737 | 1.231 | 0.518 | 0.920 | 0.392 |
| 1368036_at   | M60103    | protein tyrosine phosphatase, receptor type, F                                                                        | Ptprf             | 1.043 | 0.462 | 0.917 | 0.283 | 0.881 | 0.046 | 0.865 | 0.061 |
| 1396793_at   | BE121129  | protein tyrosine phosphatase, receptor type, f polypeptide (PTPRF), interacting protein (liprin), alpha 2 (predicted) | Ppfia2_predicted  | 0.976 | 0.850 | 0.977 | 0.944 | 0.968 | 0.911 | 1.088 | 0.741 |



|              |           |                                                                                                                                                                                                                                                                                                                                                                                                                                                                           |                                                                                                                                                            |         |       |         |       |         |       |         |       |
|--------------|-----------|---------------------------------------------------------------------------------------------------------------------------------------------------------------------------------------------------------------------------------------------------------------------------------------------------------------------------------------------------------------------------------------------------------------------------------------------------------------------------|------------------------------------------------------------------------------------------------------------------------------------------------------------|---------|-------|---------|-------|---------|-------|---------|-------|
| 1387444_at   | NM_133592 | protein tyrosine phosphatase, receptor type, H                                                                                                                                                                                                                                                                                                                                                                                                                            | Ptprh                                                                                                                                                      | 0.953   | 0.192 | 0.941   | 0.354 | 1.411   | 0.082 | 1.084   | 0.533 |
| 1368589_at   | NM_017269 | protein tyrosine phosphatase, receptor type, J                                                                                                                                                                                                                                                                                                                                                                                                                            | Ptprj                                                                                                                                                      | 1.762   | 0.133 | 0.887   | 0.455 | 5.760   | 0.102 | 1.012   | 0.890 |
| 1370362_at   | D45414    | protein tyrosine phosphatase, receptor type, N                                                                                                                                                                                                                                                                                                                                                                                                                            | Ptprn                                                                                                                                                      | 0.809   | 0.072 | 0.654   | 0.003 | 0.836   | 0.021 | 0.651   | 0.001 |
| 1370182_at   | AI574884  | protein tyrosine phosphatase, receptor type, N polypeptide 2                                                                                                                                                                                                                                                                                                                                                                                                              | Ptprn2                                                                                                                                                     | 0.675   | 0.979 | 0.253   | 0.000 | 0.739   | 0.503 | 0.305   | 0.009 |
| 1368412_a_at | D45412    | protein tyrosine phosphatase, receptor type, O                                                                                                                                                                                                                                                                                                                                                                                                                            | Ptpro                                                                                                                                                      | 1.468   | 0.058 | 0.950   | 0.921 | 1.334   | 0.178 | 1.013   | 0.497 |
| 1391605_at   | BG666431  | Protein tyrosine phosphatase, receptor type, T (predicted)                                                                                                                                                                                                                                                                                                                                                                                                                | Ptprt_predicted                                                                                                                                            | 1.008   | 0.909 | 1.187   | 0.049 | 1.012   | 0.929 | 1.378   | 0.122 |
| 1368350_at   | NM_013080 | protein tyrosine phosphatase, receptor-type, Z polypeptide 1                                                                                                                                                                                                                                                                                                                                                                                                              | Ptprz1                                                                                                                                                     | 1.138   | 0.251 | 1.388   | 0.006 | 1.226   | 0.638 | 1.586   | 0.008 |
| 1388015_at   | U04998    | protein tyrosine phosphatase, receptor-type, Z polypeptide 1                                                                                                                                                                                                                                                                                                                                                                                                              | Ptprz1                                                                                                                                                     | 1.059   | 0.332 | 1.388   | 0.147 | 1.110   | 0.227 | 0.987   | 0.804 |
| 1374393_at   | AI169080  | protein tyrosine phosphatase-like (proline instead of catalytic arginine), member b (predicted)                                                                                                                                                                                                                                                                                                                                                                           | Ptplb_predicted                                                                                                                                            | 1.133   | 0.382 | 1.406   | 0.262 | 0.997   | 0.512 | 1.404   | 0.001 |
| 1389136_at   | AI406280  | protein-kinase, interferon-inducible double stranded RNA dependent inhibitor, repressor of (P58 repressor) (predicted)                                                                                                                                                                                                                                                                                                                                                    | Prkrir_predicted                                                                                                                                           | 0.933   | 0.411 | 1.450   | 0.046 | 0.810   | 0.180 | 1.000   | 0.997 |
| 1371966_at   | BM392375  | protein-L-isoaspartate (D-aspartate) O-methyltransferase 1                                                                                                                                                                                                                                                                                                                                                                                                                | Pcmt1                                                                                                                                                      | 0.916   | 0.579 | 0.770   | 0.014 | 0.764   | 0.594 | 0.930   | 0.950 |
| 1387258_a_at | D11475    | protein-L-isoaspartate (D-aspartate) O-methyltransferase 1                                                                                                                                                                                                                                                                                                                                                                                                                | Pcmt1                                                                                                                                                      | 0.919   | 0.869 | 2.333   | 0.061 | 0.840   | 0.729 | 1.574   | 0.123 |
| 1374454_at   | BM388557  | Protein-L-isoaspartate (D-aspartate) O-methyltransferase domain containing 2 (predicted)                                                                                                                                                                                                                                                                                                                                                                                  | Pcmdt2_predicted                                                                                                                                           | 0.596   | 0.002 | 0.204   | 0.003 | 0.529   | 0.029 | 0.466   | 0.037 |
| 1375916_at   | AA955163  | Protein-L-isoaspartate (D-aspartate) O-methyltransferase domain containing 2 (predicted)                                                                                                                                                                                                                                                                                                                                                                                  | Pcmdt2_predicted                                                                                                                                           | 0.535   | 0.015 | 0.317   | 0.029 | 0.626   | 0.032 | 0.241   | 0.035 |
| 1368267_at   | NM_053406 | protein-O-mannosyltransferase 1                                                                                                                                                                                                                                                                                                                                                                                                                                           | Pomt1                                                                                                                                                      | 0.720   | 0.144 | 0.788   | 0.153 | 0.718   | 0.130 | 0.751   | 0.138 |
| 1374457_at   | AI180194  | protein-O-mannosyltransferase 2                                                                                                                                                                                                                                                                                                                                                                                                                                           | Pomt2                                                                                                                                                      | 1.824   | 0.004 | 3.730   | 0.002 | 1.371   | 0.084 | 2.256   | 0.002 |
| 1388393_at   | BM385031  | proteolipid protein 2 (mapped)                                                                                                                                                                                                                                                                                                                                                                                                                                            | Plp2_mapped                                                                                                                                                | 1.289   | 0.062 | 3.745   | 0.000 | 0.856   | 0.134 | 2.269   | 0.015 |
| 1367786_at   | NM_080767 | proteosome (prosome, macropain) subunit, beta type 8                                                                                                                                                                                                                                                                                                                                                                                                                      | Psmb8                                                                                                                                                      | 115.606 | 0.004 | 182.625 | 0.001 | 211.001 | 0.008 | 229.126 | 0.001 |
| 1370186_at   | AI599350  | proteosome (prosome, macropain) subunit, beta type 9                                                                                                                                                                                                                                                                                                                                                                                                                      | Psmb9                                                                                                                                                      | 158.445 | 0.001 | 314.537 | 0.000 | 286.063 | 0.000 | 395.862 | 0.000 |
| 1370243_a_at | AI178772  | prothymosin alpha                                                                                                                                                                                                                                                                                                                                                                                                                                                         | Ptma                                                                                                                                                       | 0.655   | 0.193 | 1.222   | 0.585 | 0.587   | 0.278 | 0.793   | 0.656 |
| 1374266_at   | AA955773  | Protocadherin 1 (cadherin-like 1) (predicted)                                                                                                                                                                                                                                                                                                                                                                                                                             | Pcdh1_predicted                                                                                                                                            | 1.100   | 0.733 | 2.687   | 0.072 | 1.342   | 0.113 | 1.674   | 0.139 |
| 1393454_at   | BF558981  | Protocadherin 17 (predicted)                                                                                                                                                                                                                                                                                                                                                                                                                                              | Pcdh17_predicted                                                                                                                                           | 1.806   | 0.261 | 0.903   | 0.739 | 0.942   | 0.711 | 1.436   | 0.795 |
| 1378486_at   | BF409825  | Protocadherin 17 (predicted)                                                                                                                                                                                                                                                                                                                                                                                                                                              | Pcdh17_predicted                                                                                                                                           | 1.192   | 0.425 | 0.997   | 0.912 | 0.980   | 0.999 | 1.004   | 0.960 |
| 1391013_at   | AW523567  | Protocadherin 8                                                                                                                                                                                                                                                                                                                                                                                                                                                           | Pcdh8                                                                                                                                                      | 3.391   | 0.022 | 5.074   | 0.000 | 2.103   | 0.074 | 1.788   | 0.017 |
| 1378665_at   | BF415436  | Protocadherin 9 (predicted)                                                                                                                                                                                                                                                                                                                                                                                                                                               | Pcdh9_predicted                                                                                                                                            | 0.236   | 0.001 | 0.173   | 0.008 | 0.230   | 0.034 | 0.457   | 0.010 |
| 1383783_at   | AW521192  | protocadherin 9 (predicted)                                                                                                                                                                                                                                                                                                                                                                                                                                               | Pcdh9_predicted                                                                                                                                            | 0.988   | 0.112 | 0.201   | 0.002 | 0.338   | 0.007 | 0.351   | 0.007 |
| 1397688_at   | BG667330  | protocadherin 9 (predicted)                                                                                                                                                                                                                                                                                                                                                                                                                                               | Pcdh9_predicted                                                                                                                                            | 0.988   | 0.290 | 0.962   | 0.152 | 0.945   | 0.161 | 1.475   | 0.062 |
| 1397139_at   | BF413644  | Protocadherin alpha 4                                                                                                                                                                                                                                                                                                                                                                                                                                                     | Pcdha4                                                                                                                                                     | 1.306   | 0.846 | 0.861   | 0.459 | 1.645   | 0.180 | 0.795   | 0.050 |
| 1390821_at   | AI103156  | protocadherin alpha 4 /// protocadherin alpha 13 /// protocadherin alpha 10 /// protocadherin alpha 11 /// protocadherin alpha 3 /// protocadherin alpha 8 /// protocadherin alpha 1 /// protocadherin alpha 2 /// protocadherin alpha 5 /// protocadherin alpha 6 /// protocadherin alpha 7 /// protocadherin alpha 9 /// protocadherin alpha subfamily C, 1 /// protocadherin alpha subfamily C, 2 /// protocadherin alpha 11                                           | Pcdha4 /// Pcdha13 /// Pcdha10 /// Pcdha11 /// Pcdha3 /// Pcdha8 /// Pcdha1 /// Pcdha2 /// Pcdha5 /// Pcdha6 /// Pcdha7 /// Pcdha9 /// Pcdhac1 /// Pcdhac2 | 1.465   | 0.105 | 0.515   | 0.016 | 2.024   | 0.003 | 0.740   | 0.024 |
| 1393149_at   | BG663483  | protocadherin alpha 4 /// protocadherin alpha 13 /// protocadherin alpha 10 /// protocadherin alpha 11 /// protocadherin alpha 3 /// protocadherin alpha 8 /// protocadherin alpha 1 /// protocadherin alpha 2 /// protocadherin alpha 5 /// protocadherin alpha 6 /// protocadherin alpha 7 /// protocadherin alpha 9 /// protocadherin alpha subfamily C, 1 /// protocadherin alpha subfamily C, 2 /// protocadherin alpha 11                                           | Pcdha4 /// Pcdha13 /// Pcdha10 /// Pcdha11 /// Pcdha3 /// Pcdha8 /// Pcdha1 /// Pcdha2 /// Pcdha5 /// Pcdha6 /// Pcdha7 /// Pcdha9 /// Pcdhac1 /// Pcdhac2 | 1.064   | 0.704 | 0.849   | 0.297 | 1.244   | 0.114 | 0.796   | 0.407 |
| 1388551_at   | AW434022  | protocadherin gamma subfamily C, 3 /// protocadherin gamma subfamily A, 9 /// protocadherin gamma subfamily A, 11 /// protocadherin gamma subfamily A, 7 /// protocadherin gamma subfamily A, 5 /// protocadherin gamma subfamily A, 8 /// protocadherin gamma b7 /// protocadherin gamma subfamily B, 5 /// protocadherin gamma a2 /// protocadherin gamma A3 /// protocadherin gamma subfamily A, 10 /// protocadherin gamma subfamily A, 12 /// protocadherin gamma a1 | Pcdhgc3 /// Pcdhga9 /// Pcdhga11 /// Pcdhga7 /// Pcdhga5 /// Pcdhga8 /// Pcdhgb7 /// Pcdhgb5 /// Pcdhga2 /// Pcdhga3 /// Pcdhga10 /// Pcdhga12 /// Pcdhga1 | 0.685   | 0.025 | 0.512   | 0.007 | 0.778   | 0.054 | 0.699   | 0.148 |
| 1377079_a_at | BF386283  | protoporphyrinogen oxidase (predicted)                                                                                                                                                                                                                                                                                                                                                                                                                                    | Ppox_predicted                                                                                                                                             | 0.423   | 0.081 | 0.437   | 0.016 | 0.649   | 0.150 | 0.486   | 0.005 |
| 1399021_at   | BI291269  | PRP18 pre-mRNA processing factor 18 homolog (yeast)                                                                                                                                                                                                                                                                                                                                                                                                                       | Pprf18                                                                                                                                                     | 1.103   | 0.944 | 0.810   | 0.811 | 0.978   | 0.123 | 0.729   | 0.083 |
| 1388005_at   | AF244920  | PRP18 pre-mRNA processing factor 18 homolog (yeast)                                                                                                                                                                                                                                                                                                                                                                                                                       | Pprf18                                                                                                                                                     | 1.010   | 0.996 | 0.962   | 0.499 | 0.957   | 0.993 | 0.938   | 0.485 |
| 1398867_at   | AB020022  | PRP19/PSO4 pre-mRNA processing factor 19 homolog (S. cerevisiae)                                                                                                                                                                                                                                                                                                                                                                                                          | Prpf19                                                                                                                                                     | 0.844   | 0.212 | 1.299   | 0.043 | 1.060   | 0.409 | 1.263   | 0.024 |
| 1372432_at   | BF395125  | PRP3 pre-mRNA processing factor 3 homolog (yeast) (predicted)                                                                                                                                                                                                                                                                                                                                                                                                             | Prpf3_predicted                                                                                                                                            | 0.743   | 0.127 | 2.021   | 0.065 | 1.134   | 0.859 | 1.813   | 0.532 |
| 1373273_at   | BM384975  | PRP38 pre-mRNA processing factor 38 (yeast) domain containing A (predicted)                                                                                                                                                                                                                                                                                                                                                                                               | Prpf38a_predicted                                                                                                                                          | 0.636   | 0.175 | 1.123   | 0.443 | 0.594   | 0.014 | 1.169   | 0.480 |
| 1389684_at   | AA850679  | PRP39 pre-mRNA processing factor 39 homolog (yeast) (predicted)                                                                                                                                                                                                                                                                                                                                                                                                           | Prpf39_predicted                                                                                                                                           | 1.373   | 0.052 | 1.407   | 0.010 | 1.187   | 0.078 | 1.325   | 0.008 |
| 1392461_at   | BI291012  | PRP4 pre-mRNA processing factor 4 homolog (yeast)                                                                                                                                                                                                                                                                                                                                                                                                                         | Prpf4                                                                                                                                                      | 0.909   | 0.052 | 1.006   | 0.466 | 0.513   | 0.017 | 0.997   | 0.794 |
| 1382646_at   | AI145475  | PRP4 pre-mRNA processing factor 4 homolog B (yeast)                                                                                                                                                                                                                                                                                                                                                                                                                       | Prpf4b                                                                                                                                                     | 0.356   | 0.003 | 0.244   | 0.091 | 0.322   | 0.006 | 0.466   | 0.134 |
| 1397203_at   | BE105398  | PRP4 pre-mRNA processing factor 4 homolog B (yeast)                                                                                                                                                                                                                                                                                                                                                                                                                       | Prpf4b                                                                                                                                                     | 0.650   | 0.108 | 0.718   | 0.070 | 0.970   | 0.287 | 0.577   | 0.082 |
| 1376010_at   | BM384201  | PRP4 pre-mRNA processing factor 4 homolog B (yeast)                                                                                                                                                                                                                                                                                                                                                                                                                       | Prpf4b                                                                                                                                                     | 1.142   | 0.386 | 1.020   | 0.257 | 1.057   | 0.723 | 1.027   | 0.329 |

|              |           |                                                                                                              |                         |       |       |        |       |       |       |       |       |
|--------------|-----------|--------------------------------------------------------------------------------------------------------------|-------------------------|-------|-------|--------|-------|-------|-------|-------|-------|
| 1373741_at   | BM386451  | pseudouridine synthase 1                                                                                     | Pus1                    | 0.983 | 0.750 | 3.413  | 0.006 | 0.508 | 0.055 | 2.396 | 0.032 |
| 1372485_at   | BF281220  | pterin 4 alpha carbinolamine dehydratase/dimerization cofactor of hepatocyte nuclear factor 1 alpha (TCF1) 1 | Pcbd1                   | 0.507 | 0.180 | 0.279  | 0.007 | 0.391 | 0.020 | 0.296 | 0.006 |
| 1394338_x_at | BF290004  | PTK2 protein tyrosine kinase 2                                                                               | Ptk2                    | 2.263 | 0.062 | 1.426  | 0.082 | 3.092 | 0.005 | 1.300 | 0.158 |
| 1387875_at   | BI294798  | PTK2 protein tyrosine kinase 2                                                                               | Ptk2                    | 1.851 | 0.081 | 1.026  | 0.318 | 2.066 | 0.001 | 1.102 | 0.272 |
| 1383602_at   | BE112428  | Pumilio 1 (Drosophila) (predicted)                                                                           | Pum1_predicted          | 1.132 | 0.055 | 1.160  | 0.017 | 1.220 | 0.264 | 1.136 | 0.071 |
| 1375396_at   | BI282129  | pumilio 1 (Drosophila) (predicted)                                                                           | Pum1_predicted          | 1.239 | 0.188 | 1.232  | 0.087 | 0.970 | 0.609 | 1.000 | 0.444 |
| 1375534_at   | BE118698  | pumilio 2 (Drosophila)                                                                                       | Pum2                    | 1.061 | 0.172 | 1.404  | 0.040 | 1.172 | 0.139 | 1.339 | 0.239 |
| 1398947_at   | BE107358  | pumilio 2 (Drosophila)                                                                                       | Pum2                    | 1.060 | 0.514 | 1.046  | 0.826 | 1.103 | 0.075 | 1.055 | 0.091 |
| 1382198_at   | AI233267  | pumilio 2 (Drosophila)                                                                                       | Pum2                    | 1.307 | 0.546 | 1.336  | 0.092 | 1.245 | 0.932 | 1.384 | 0.475 |
| 1375682_at   | BM382879  | Purine rich element binding protein A (predicted)                                                            | Pura_predicted          | 0.892 | 0.968 | 0.751  | 0.942 | 0.905 | 0.614 | 1.054 | 0.767 |
| 1369743_a_at | U32497    | purinergic receptor P2X, ligand-gated ion channel 4                                                          | P2rx4                   | 0.824 | 0.566 | 1.046  | 0.590 | 0.938 | 0.681 | 1.061 | 0.662 |
| 1387718_at   | NM_019256 | purinergic receptor P2X, ligand-gated ion channel, 7                                                         | P2rx7                   | 0.997 | 0.984 | 0.998  | 0.936 | 1.003 | 0.880 | 1.000 | 0.976 |
| 1370606_at   | U22830    | purinergic receptor P2Y, G-protein coupled 1                                                                 | P2ry1                   | 0.404 | 0.078 | 0.103  | 0.002 | 0.414 | 0.063 | 0.153 | 0.002 |
| 1368145_at   | NM_013002 | Purkinje cell protein 4                                                                                      | Pcp4                    | 0.785 | 0.796 | 0.434  | 0.011 | 0.516 | 0.021 | 0.250 | 0.011 |
| 1391415_at   | AI043694  | putative 28 kDa protein                                                                                      | LOC289809               | 0.713 | 0.268 | 2.407  | 0.021 | 0.601 | 0.016 | 2.373 | 0.013 |
| 1388889_at   | AI598417  | putative aminopeptidase Fxna                                                                                 | Fxna                    | 1.424 | 0.611 | 1.411  | 0.066 | 1.797 | 0.259 | 1.804 | 0.003 |
| 1384975_at   | BM387447  | putative aminopeptidase Fxna                                                                                 | Fxna                    | 0.940 | 0.837 | 0.540  | 0.056 | 1.330 | 0.742 | 0.873 | 0.423 |
| 1399093_at   | BM392394  | putative GTP-binding protein                                                                                 | LOC293589               | 0.603 | 0.125 | 0.539  | 0.012 | 0.503 | 0.071 | 0.523 | 0.016 |
| 1376653_at   | BE106772  | putative homeodomain transcription factor 1                                                                  | Phtf1                   | 0.726 | 0.017 | 0.702  | 0.004 | 0.716 | 0.012 | 0.690 | 0.019 |
| 1390647_at   | AI410924  | Putative homeodomain transcription factor 2 (predicted)                                                      | Phtf2_predicted         | 0.347 | 0.009 | 0.169  | 0.001 | 0.493 | 0.010 | 0.254 | 0.009 |
| 1387770_at   | NM_130743 | putative ISG12(a) protein                                                                                    | isg12(a)                | 3.133 | 0.028 | 2.266  | 0.017 | 3.812 | 0.000 | 3.546 | 0.001 |
| 1376845_at   | AA819034  | putative ISG12(b) protein                                                                                    | isg12(b)                | 1.415 | 0.045 | 3.288  | 0.002 | 1.383 | 0.009 | 3.641 | 0.001 |
| 1370664_a_at | AF016185  | putative pheromone receptor (Go-VN13B) /// putative pheromone receptor Go-VN13C                              | LOC286980 /// LOC286986 | 0.823 | 0.306 | 1.160  | 0.540 | 1.951 | 0.506 | 1.341 | 0.425 |
| 1370659_at   | AF016179  | putative pheromone receptor (Go-VN2)                                                                         | LOC286981               | 1.225 | 0.874 | 0.923  | 0.852 | 1.246 | 0.363 | 0.872 | 0.151 |
| 1383343_at   | BI300511  | Putative pheromone receptor V2R4                                                                             | LOC292498               | 0.613 | 0.121 | 0.738  | 0.429 | 1.030 | 0.912 | 1.014 | 0.953 |
| 1369543_s_at | NM_138856 | putative regulation protein GS3                                                                              | Gs3                     | 0.930 | 0.380 | 1.126  | 0.582 | 0.925 | 0.044 | 1.340 | 0.233 |
| 1370565_at   | AF057564  | putative retrovirus-related gag protein                                                                      | LOC286991               | 1.175 | 0.795 | 0.898  | 0.426 | 1.072 | 0.459 | 1.020 | 0.255 |
| 1370408_at   | AF313411  | putative small membrane protein NID67                                                                        | Nid67                   | 4.233 | 0.000 | 1.257  | 0.487 | 4.908 | 0.006 | 1.268 | 0.095 |
| 1373546_at   | AI409922  | Putative UA20 protein                                                                                        | Ua20                    | 1.171 | 0.345 | 1.658  | 0.025 | 1.322 | 0.065 | 1.948 | 0.011 |
| 1397380_at   | BG376947  | PX domain containing serine/threonine kinase                                                                 | Pxk                     | 1.814 | 0.048 | 1.113  | 0.617 | 1.902 | 0.180 | 0.629 | 0.044 |
| 1390422_at   | AW920759  | PX domain containing serine/threonine kinase                                                                 | Pxk                     | 1.133 | 0.868 | 0.889  | 0.984 | 0.868 | 0.139 | 0.981 | 0.453 |
| 1395279_at   | BI297004  | PX domain containing serine/threonine kinase                                                                 | Pxk                     | 0.975 | 0.952 | 0.793  | 0.028 | 0.999 | 0.794 | 0.598 | 0.068 |
| 1389873_at   | BI282953  | PYD and CARD domain containing                                                                               | Pycard                  | 1.060 | 0.690 | 0.951  | 0.974 | 1.024 | 0.713 | 1.150 | 0.053 |
| 1369989_at   | NM_022601 | pyridoxine 5'-phosphate oxidase                                                                              | Pnpo                    | 0.324 | 0.031 | 0.496  | 0.001 | 0.348 | 0.060 | 0.584 | 0.004 |
| 1375215_x_at | BE109558  | pyroglutamyl-peptidase I                                                                                     | Pgpep1                  | 0.882 | 0.213 | 1.982  | 0.012 | 0.754 | 0.302 | 1.820 | 0.048 |
| 1377576_at   | AA891800  | pyrophosphatase (inorganic) 2 (predicted)                                                                    | Ppa2_predicted          | 0.098 | 0.022 | 0.342  | 0.000 | 0.081 | 0.000 | 0.491 | 0.011 |
| 1388960_at   | AI412958  | pyrophosphatase (mapped)                                                                                     | Pyp_mapped              | 0.483 | 0.072 | 1.579  | 0.008 | 0.552 | 0.010 | 1.428 | 0.004 |
| 1373640_at   | AW525211  | pyrroline-5-carboxylate reductase family, member 2                                                           | Pycr2                   | 0.346 | 0.032 | 0.705  | 0.004 | 0.342 | 0.063 | 0.710 | 0.025 |
| 1392535_at   | AI169002  | pyrroline-5-carboxylate reductase-like                                                                       | Pycr1                   | 0.599 | 0.050 | 0.759  | 0.236 | 0.521 | 0.413 | 0.556 | 0.225 |
| 1388521_at   | BG380693  | pyrroline-5-carboxylate synthetase (glutamate gamma-semialdehyde synthetase) (predicted)                     | Pycs_predicted          | 0.747 | 0.102 | 0.625  | 0.001 | 0.621 | 0.027 | 0.752 | 0.029 |
| 1386917_at   | NM_012744 | Pyruvate carboxylase                                                                                         | Pc                      | 0.375 | 0.397 | 0.469  | 0.005 | 0.751 | 0.209 | 0.606 | 0.124 |
| 1371388_at   | BM389223  | pyruvate dehydrogenase (lipoamide) beta                                                                      | Pdhb                    | 0.583 | 0.037 | 0.743  | 0.003 | 0.518 | 0.010 | 0.727 | 0.077 |
| 1383698_at   | BF561717  | pyruvate dehydrogenase E1 alpha 1                                                                            | Pdha1                   | 1.824 | 0.098 | 1.345  | 0.194 | 2.332 | 0.031 | 1.733 | 0.030 |
| 1371380_at   | AI411413  | pyruvate dehydrogenase E1 alpha 1                                                                            | Pdha1                   | 0.909 | 0.598 | 1.151  | 0.168 | 1.098 | 0.026 | 1.367 | 0.007 |
| 1368079_at   | NM_053826 | pyruvate dehydrogenase kinase, isoenzyme 1                                                                   | Pdk1                    | 0.929 | 0.812 | 15.713 | 0.051 | 0.974 | 0.754 | 9.334 | 0.041 |
| 1384315_at   | BM389330  | pyruvate dehydrogenase kinase, isoenzyme 3 (mapped)                                                          | Pdk3_mapped             | 0.956 | 0.210 | 0.606  | 0.067 | 0.927 | 0.116 | 0.673 | 0.082 |
| 1369150_at   | NM_053551 | pyruvate dehydrogenase kinase, isoenzyme 4                                                                   | Pdk4                    | 1.094 | 0.112 | 1.811  | 0.230 | 1.010 | 0.447 | 2.104 | 0.130 |
| 1370509_at   | AF062741  | pyruvate dehydrogenase phosphatase isoenzyme 2                                                               | Pdp2                    | 0.895 | 0.164 | 1.626  | 0.069 | 0.797 | 0.304 | 1.063 | 0.361 |
| 1380045_at   | AI411446  | pyruvate dehydrogenase phosphatase isoenzyme 2                                                               | Pdp2                    | 1.294 | 0.652 | 0.980  | 0.701 | 0.830 | 0.615 | 0.835 | 0.458 |
| 1368651_at   | M17685    | pyruvate kinase, liver and red blood cell                                                                    | Pklr                    | 0.507 | 0.018 | 0.201  | 0.000 | 0.525 | 0.020 | 0.223 | 0.025 |
| 1387263_at   | NM_012624 | pyruvate kinase, liver and red blood cell                                                                    | Pklr                    | 0.511 | 0.067 | 0.150  | 0.001 | 0.318 | 0.049 | 0.275 | 0.008 |
| 1397851_at   | BE102226  | Quaking homolog, KH domain RNA binding (mouse)                                                               | Qki                     | 0.991 | 0.858 | 1.066  | 0.489 | 1.209 | 0.247 | 0.950 | 0.686 |
| 1372542_at   | BE113281  | Quaking homolog, KH domain RNA binding (mouse)                                                               | Qki                     | 1.051 | 0.874 | 1.033  | 0.446 | 1.011 | 0.835 | 1.069 | 0.755 |
| 1383238_at   | AI060136  | queuine tRNA-ribosyltransferase 1                                                                            | Qtrt1                   | 1.001 | 0.993 | 3.364  | 0.023 | 0.999 | 0.961 | 1.757 | 0.010 |
| 1367695_at   | NM_022390 | quinoid dihydropteridine reductase                                                                           | Qdpr                    | 0.534 | 0.173 | 1.217  | 0.806 | 0.511 | 0.023 | 1.103 | 0.274 |
| 1372672_at   | AI407095  | quinolinate phosphoribosyltransferase                                                                        | Qprt                    | 1.068 | 0.783 | 0.858  | 0.478 | 1.519 | 0.225 | 1.086 | 0.507 |
| 1373481_at   | AI227908  | R3H domain containing 1                                                                                      | R3hdm1                  | 0.941 | 0.031 | 1.791  | 0.001 | 1.042 | 0.636 | 1.519 | 0.003 |
| 1398780_at   | NM_031774 | Rab acceptor 1 (prenylated)                                                                                  | Rabac1                  | 0.814 | 0.765 | 0.693  | 0.105 | 0.625 | 0.020 | 0.810 | 0.103 |
| 1396303_at   | BI291790  | Rab acceptor 1 (prenylated)                                                                                  | Rabac1                  | 0.944 | 0.850 | 1.069  | 0.283 | 1.186 | 0.252 | 0.868 | 0.399 |
| 1387911_at   | L10416    | RAB geranylgeranyl transferase, b subunit                                                                    | Rabggtb                 | 1.250 | 0.138 | 2.404  | 0.008 | 0.984 | 0.680 | 1.683 | 0.021 |
| 1384089_at   | AI575052  | RAB guanine nucleotide exchange factor (GEF) 1 (predicted)                                                   | Rabgef1_predicted       | 1.673 | 0.091 | 1.759  | 0.009 | 1.175 | 0.820 | 1.395 | 0.412 |

|              |           |                                                                                    |                                   |        |       |        |       |        |       |        |       |
|--------------|-----------|------------------------------------------------------------------------------------|-----------------------------------|--------|-------|--------|-------|--------|-------|--------|-------|
| 1382039_at   | AA944201  | RAB, member of RAS oncogene family-like 2A                                         | Rab12a                            | 1.420  | 0.069 | 1.013  | 0.727 | 1.915  | 0.224 | 0.888  | 0.740 |
| 1376807_at   | BF417476  | RAB, member of RAS oncogene family-like 3 (predicted)                              | Rab13_predicted                   | 0.600  | 0.467 | 0.790  | 0.006 | 0.918  | 0.150 | 0.866  | 0.206 |
| 1379349_a_at | AI406710  | RAB, member of RAS oncogene family-like 5                                          | Rab15                             | 1.034  | 0.995 | 0.932  | 0.579 | 1.044  | 0.953 | 0.881  | 0.108 |
| 1398841_at   | AI411122  | RAB1, member RAS oncogene family                                                   | Rab1                              | 0.676  | 0.241 | 1.005  | 0.916 | 0.841  | 0.642 | 0.943  | 0.074 |
| 1373022_at   | AI231860  | RAB1, member RAS oncogene family                                                   | Rab1                              | 0.627  | 0.559 | 0.688  | 0.001 | 0.640  | 0.228 | 0.672  | 0.007 |
| 1375338_at   | AA945841  | RAB10, member RAS oncogene family                                                  | Rab10                             | 0.829  | 0.362 | 0.575  | 0.008 | 0.845  | 0.065 | 0.698  | 0.005 |
| 1368847_at   | NM_017359 | RAB10, member RAS oncogene family                                                  | Rab10                             | 1.058  | 0.776 | 1.811  | 0.004 | 0.871  | 0.314 | 1.633  | 0.016 |
| 1398814_at   | NM_031152 | RAB11a, member RAS oncogene family                                                 | Rab11a                            | 1.279  | 0.349 | 1.380  | 0.011 | 1.323  | 0.124 | 1.206  | 0.011 |
| 1374069_at   | BE118560  | RAB11a, member RAS oncogene family                                                 | Rab11a                            | 1.167  | 0.434 | 0.461  | 0.007 | 1.584  | 0.328 | 0.591  | 0.013 |
| 1375163_at   | BI275870  | RAB11B, member RAS oncogene family                                                 | Rab11b                            | 0.707  | 0.220 | 1.015  | 0.037 | 0.796  | 0.076 | 1.102  | 0.106 |
| 1398825_at   | D01046    | RAB11B, member RAS oncogene family                                                 | Rab11b                            | 0.977  | 0.900 | 1.393  | 0.141 | 0.678  | 0.037 | 0.979  | 0.348 |
| 1388140_at   | AW253722  | RAB13, member RAS oncogene family                                                  | Rab13                             | 2.513  | 0.078 | 1.703  | 0.238 | 1.781  | 0.078 | 4.196  | 0.026 |
| 1367884_at   | NM_053589 | RAB14, member RAS oncogene family                                                  | Rab14                             | 0.780  | 0.192 | 1.393  | 0.057 | 0.736  | 0.065 | 0.958  | 0.561 |
| 1376796_at   | BG372452  | RAB14, member RAS oncogene family                                                  | Rab14                             | 1.014  | 0.752 | 1.908  | 0.080 | 0.770  | 0.354 | 1.254  | 0.346 |
| 1373646_at   | BM384841  | RAB15, member RAS oncogene family                                                  | Rab15                             | 9.374  | 0.034 | 6.952  | 0.032 | 2.521  | 0.071 | 1.755  | 0.093 |
| 1389292_at   | AI411439  | RAB18, member RAS oncogene family /// similar to Rab18 (predicted)                 | Rab18 ///<br>RGD1563713_predicted | 0.769  | 0.753 | 0.982  | 0.758 | 0.776  | 0.859 | 0.803  | 0.052 |
| 1392681_at   | AW522578  | RAB2, member RAS oncogene family                                                   | Rab2                              | 0.873  | 0.399 | 0.710  | 0.001 | 0.676  | 0.050 | 0.657  | 0.022 |
| 1370087_at   | NM_031718 | RAB2, member RAS oncogene family                                                   | Rab2                              | 0.803  | 0.969 | 1.597  | 0.010 | 0.603  | 0.229 | 1.261  | 0.148 |
| 1376029_at   | BI295991  | RAB2, member RAS oncogene family-like                                              | Rab2l                             | 10.942 | 0.000 | 11.710 | 0.001 | 19.723 | 0.000 | 19.133 | 0.000 |
| 1388839_at   | AI233143  | RAB2, member RAS oncogene family-like                                              | Rab2l                             | 0.933  | 0.913 | 0.798  | 0.499 | 1.406  | 0.932 | 1.693  | 0.839 |
| 1383089_at   | BM386264  | RAB21, member RAS oncogene family                                                  | Rab21                             | 1.589  | 0.001 | 2.308  | 0.000 | 1.598  | 0.000 | 2.546  | 0.002 |
| 1376705_a_at | BF289020  | RAB24, member RAS oncogene family                                                  | Rab24                             | 1.120  | 0.361 | 1.779  | 0.000 | 0.866  | 0.385 | 1.392  | 0.001 |
| 1377363_at   | AA945861  | RAB25, member RAS oncogene family (predicted)                                      | Rab25_predicted                   | 0.579  | 0.650 | 1.101  | 0.536 | 0.426  | 0.037 | 0.942  | 0.469 |
| 1369004_at   | NM_133580 | RAB26, member RAS oncogene family                                                  | Rab26                             | 0.937  | 0.878 | 0.801  | 0.035 | 0.981  | 0.892 | 0.802  | 0.073 |
| 1377669_at   | BM389524  | RAB27A, member RAS oncogene family                                                 | Rab27a                            | 0.568  | 0.374 | 0.306  | 0.006 | 0.582  | 0.036 | 0.346  | 0.018 |
| 1384852_at   | AI043615  | RAB27A, member RAS oncogene family                                                 | Rab27a                            | 0.908  | 0.986 | 0.827  | 0.531 | 0.921  | 0.353 | 0.796  | 0.593 |
| 1368216_at   | NM_053978 | RAB28, member RAS oncogene family                                                  | Rab28                             | 0.803  | 0.077 | 1.024  | 0.238 | 0.889  | 0.131 | 1.229  | 0.032 |
| 1375985_at   | BF282984  | RAB2B, member RAS oncogene family                                                  | Rab2b                             | 0.404  | 0.213 | 0.464  | 0.005 | 0.756  | 0.194 | 0.569  | 0.003 |
| 1388892_at   | BF395178  | RAB2B, member RAS oncogene family                                                  | Rab2b                             | 1.016  | 0.394 | 0.898  | 0.380 | 1.243  | 0.720 | 0.899  | 0.120 |
| 1374502_at   | AI180286  | RAB3 GTPase activating protein subunit 2                                           | Rab3gap2                          | 1.580  | 0.058 | 1.786  | 0.010 | 1.417  | 0.097 | 1.574  | 0.087 |
| 1373894_at   | BF410946  | RAB31, member RAS oncogene family                                                  | Rab31                             | 2.347  | 0.057 | 1.328  | 0.249 | 1.260  | 0.308 | 0.999  | 0.997 |
| 1394665_at   | AI408761  | RAB33B, member of RAS oncogene family (predicted)                                  | Rab33b_predicted                  | 0.975  | 0.523 | 1.080  | 0.261 | 1.086  | 0.775 | 1.209  | 0.830 |
| 1376573_at   | BM391604  | RAB34, member of RAS oncogene family                                               | Rab34                             | 0.819  | 0.206 | 1.497  | 0.009 | 0.510  | 0.071 | 1.126  | 0.691 |
| 1390268_at   | AI013484  | RAB35, member RAS oncogene family /// similar to RAB35, member RAS oncogene family | Rab35 /// LOC498191               | 1.540  | 0.283 | 1.833  | 0.043 | 1.362  | 0.006 | 1.798  | 0.086 |
| 1380132_at   | BI291804  | RAB3A interacting protein                                                          | Rab3ip                            | 1.513  | 0.083 | 1.056  | 0.764 | 0.973  | 0.839 | 1.453  | 0.182 |
| 1387821_at   | NM_017313 | RAB3A interacting protein                                                          | Rab3ip                            | 1.223  | 0.589 | 1.741  | 0.014 | 0.791  | 0.371 | 1.202  | 0.670 |
| 1391434_at   | BF389910  | RAB3A, member RAS oncogene family                                                  | Rab3a                             | 0.148  | 0.029 | 0.608  | 0.034 | 0.062  | 0.002 | 0.483  | 0.048 |
| 1369816_at   | NM_013018 | RAB3A, member RAS oncogene family                                                  | Rab3a                             | 0.369  | 0.032 | 0.583  | 0.241 | 0.379  | 0.040 | 0.297  | 0.023 |
| 1370061_at   | NM_031091 | RAB3B, member RAS oncogene family                                                  | Rab3b                             | 0.927  | 0.887 | 0.337  | 0.001 | 1.030  | 0.782 | 0.386  | 0.031 |
| 1387147_at   | NM_133536 | RAB3C, member RAS oncogene family                                                  | Rab3c                             | 0.969  | 0.527 | 1.006  | 0.657 | 0.731  | 0.080 | 1.530  | 0.048 |
| 1370055_at   | M83681    | RAB3D, member RAS oncogene family                                                  | Rab3d                             | 0.402  | 0.257 | 0.539  | 0.000 | 0.322  | 0.004 | 0.501  | 0.004 |
| 1383826_at   | AA924620  | Rab40b, member RAS oncogene family (predicted)                                     | Rab40b_predicted                  | 0.459  | 0.383 | 0.372  | 0.022 | 0.223  | 0.030 | 0.375  | 0.024 |
| 1370181_at   | BF281403  | RAB4A, member RAS oncogene family                                                  | Rab4a                             | 0.435  | 0.007 | 0.460  | 0.003 | 0.417  | 0.046 | 0.545  | 0.127 |
| 1367955_at   | NM_017355 | RAB4B, member RAS oncogene family                                                  | Rab4b                             | 0.644  | 0.564 | 0.937  | 0.090 | 0.521  | 0.677 | 0.612  | 0.090 |
| 1388800_at   | AI406667  | RAB5A, member RAS oncogene family                                                  | Rab5a                             | 1.276  | 0.056 | 2.001  | 0.002 | 1.278  | 0.023 | 1.616  | 0.005 |
| 1387641_at   | NM_022692 | RAB5A, member RAS oncogene family                                                  | Rab5a                             | 0.972  | 0.804 | 1.285  | 0.040 | 1.262  | 0.486 | 1.509  | 0.694 |
| 1388823_at   | BI274642  | RAB5B, member RAS oncogene family (predicted)                                      | Rab5b_predicted                   | 1.652  | 0.061 | 1.405  | 0.003 | 2.384  | 0.002 | 1.961  | 0.009 |
| 1399153_at   | AA996576  | RAB5B, member RAS oncogene family (predicted)                                      | Rab5b_predicted                   | 1.033  | 0.750 | 0.961  | 0.222 | 1.040  | 0.719 | 0.644  | 0.186 |
| 1393288_at   | BF560790  | RAB5B, member RAS oncogene family (predicted)                                      | Rab5b_predicted                   | 1.051  | 0.821 | 1.013  | 0.961 | 1.034  | 0.619 | 0.944  | 0.113 |
| 1371836_at   | H35233    | RAB5C, member RAS oncogene family (predicted)                                      | Rab5c_predicted                   | 0.921  | 0.823 | 1.497  | 0.071 | 1.303  | 0.093 | 1.567  | 0.425 |
| 1373375_at   | BI275835  | Rab6 interacting protein 1 (predicted)                                             | Rab6ip1_predicted                 | 0.827  | 0.511 | 0.885  | 0.144 | 0.993  | 0.935 | 0.779  | 0.156 |
| 1397229_at   | BF565781  | RAB6A, member RAS oncogene family                                                  | Rab6a                             | 1.487  | 0.297 | 1.125  | 0.123 | 1.223  | 0.095 | 1.054  | 0.877 |
| 1372707_at   | AI412961  | RAB6A, member RAS oncogene family                                                  | Rab6a                             | 0.696  | 0.351 | 1.007  | 0.464 | 0.602  | 0.157 | 0.966  | 0.261 |
| 1371103_at   | AA686757  | RAB6A, member RAS oncogene family                                                  | Rab6a                             | 1.057  | 0.962 | 3.824  | 0.017 | 0.679  | 0.000 | 1.208  | 0.021 |
| 1387797_at   | AA946057  | RAB7, member RAS oncogene family                                                   | Rab7                              | 1.102  | 0.067 | 0.960  | 0.636 | 1.670  | 0.007 | 0.982  | 0.508 |
| 1398838_at   | NM_023950 | RAB7, member RAS oncogene family                                                   | Rab7                              | 1.686  | 0.168 | 1.457  | 0.118 | 2.023  | 0.233 | 1.328  | 0.062 |
| 1368096_at   | NM_133590 | RAB7, member RAS oncogene family-like 1                                            | Rab7l1                            | 0.964  | 0.845 | 0.423  | 0.016 | 1.022  | 0.967 | 0.578  | 0.096 |
| 1370001_at   | NM_053998 | RAB8A, member RAS oncogene family                                                  | Rab8a                             | 0.699  | 0.049 | 0.915  | 0.307 | 0.705  | 0.009 | 0.853  | 0.037 |
| 1391347_at   | BF398743  | RAB8B, member RAS oncogene family                                                  | Rab8b                             | 7.178  | 0.005 | 1.672  | 0.124 | 5.615  | 0.013 | 2.340  | 0.085 |
| 1370539_at   | U53475    | RAB8B, member RAS oncogene family                                                  | Rab8b                             | 1.249  | 0.118 | 1.241  | 0.090 | 1.054  | 0.721 | 1.007  | 0.954 |

|              |           |                                                                             |                   |        |       |       |       |       |       |       |       |
|--------------|-----------|-----------------------------------------------------------------------------|-------------------|--------|-------|-------|-------|-------|-------|-------|-------|
| 1387186_at   | NM_053458 | RAB9, member RAS oncogene family                                            | Rab9              | 1.959  | 0.081 | 2.097 | 0.003 | 1.986 | 0.023 | 2.608 | 0.001 |
| 1367980_at   | NM_019124 | rabaptin, RAB GTPase binding effector protein 1                             | Rabep1            | 1.123  | 0.784 | 1.336 | 0.010 | 0.847 | 0.117 | 1.242 | 0.154 |
| 1367981_at   | U70777    | rabaptin, RAB GTPase binding effector protein 1                             | Rabep1            | 1.021  | 0.881 | 1.417 | 0.069 | 0.719 | 0.284 | 1.909 | 0.127 |
| 1395843_at   | AW143625  | Rabaptin, RAB GTPase binding effector protein 1                             | Rabep1            | 0.761  | 0.905 | 0.899 | 0.150 | 1.075 | 0.058 | 0.862 | 0.169 |
| 1387176_at   | NM_133591 | rabphilin 3A-like (without C2 domains)                                      | Rph3al            | 1.224  | 0.171 | 1.455 | 0.106 | 0.889 | 0.746 | 0.929 | 0.691 |
| 1373658_at   | AI409259  | Rac GTPase-activating protein 1 (predicted)                                 | Racgap1_predicted | 0.927  | 0.636 | 0.433 | 0.048 | 0.678 | 0.747 | 0.694 | 0.064 |
| 1377338_at   | BF395193  | RAD1 homolog (S. pombe) (predicted)                                         | Rad1_predicted    | 1.122  | 0.928 | 1.454 | 0.021 | 1.024 | 0.991 | 1.119 | 0.278 |
| 1385090_at   | BF389852  | RAD17 homolog (S. pombe)                                                    | Rad17             | 0.878  | 0.983 | 1.809 | 0.013 | 0.755 | 0.303 | 1.874 | 0.023 |
| 1392449_at   | BI282152  | RAD18 homolog (S. cerevisiae) (predicted)                                   | Rad18_predicted   | 1.032  | 0.921 | 1.223 | 0.064 | 0.811 | 0.288 | 1.352 | 0.383 |
| 1391491_a_at | BG377084  | RAD23b homolog (S. cerevisiae)                                              | Rad23b            | 0.749  | 0.279 | 2.236 | 0.028 | 0.627 | 0.176 | 1.214 | 0.398 |
| 1388550_at   | BI295122  | RAD23b homolog (S. cerevisiae)                                              | Rad23b            | 0.692  | 0.609 | 1.842 | 0.008 | 0.560 | 0.026 | 1.496 | 0.001 |
| 1385565_at   | BF564080  | RAD50 homolog (S. cerevisiae)                                               | Rad50             | 0.963  | 0.167 | 1.035 | 0.931 | 1.072 | 0.696 | 1.357 | 0.710 |
| 1390588_at   | AI549091  | RAD51-like 3 (S. cerevisiae) (predicted)                                    | Rad51l3_predicted | 1.015  | 0.979 | 0.973 | 0.541 | 1.035 | 0.884 | 0.998 | 0.990 |
| 1377902_a_at | AA893822  | RAD52 homolog (S. cerevisiae) (predicted)                                   | Rad52_predicted   | 0.592  | 0.025 | 1.131 | 0.184 | 0.610 | 0.012 | 1.433 | 0.235 |
| 1389453_at   | AA818364  | RAD52 motif 1 (predicted)                                                   | Rdm1_predicted    | 0.609  | 0.131 | 2.664 | 0.003 | 0.487 | 0.797 | 1.545 | 0.112 |
| 1397576_at   | AI576144  | Rad54 like 2 (S. cerevisiae) (predicted)                                    | Rad54l2_predicted | 1.001  | 0.897 | 0.993 | 0.101 | 1.251 | 0.058 | 1.006 | 0.923 |
| 1396511_at   | AI763815  | RAD9 homolog B (S. cerevisiae)                                              | Rad9b             | 1.176  | 0.565 | 0.986 | 0.885 | 1.012 | 0.028 | 1.042 | 0.957 |
| 1387622_at   | NM_021849 | radical fringe gene homolog (Drosophila)                                    | Rfng              | 0.997  | 0.988 | 1.000 | 0.984 | 0.998 | 0.994 | 0.994 | 0.967 |
| 1378902_at   | BF413695  | radical S-adenosyl methionine and flavodoxin domains 1 (predicted)          | Rsafdl1_predicted | 1.617  | 0.226 | 0.860 | 0.096 | 1.384 | 0.147 | 1.092 | 0.386 |
| 1383825_at   | AW527313  | radixin                                                                     | Rdx               | 0.473  | 0.006 | 1.024 | 0.471 | 0.924 | 0.089 | 0.817 | 0.464 |
| 1396207_at   | BF565167  | radixin                                                                     | Rdx               | 0.607  | 0.016 | 1.341 | 0.340 | 0.669 | 0.601 | 0.838 | 0.860 |
| 1375542_at   | AI407092  | Radixin                                                                     | Rdx               | 0.662  | 0.308 | 0.994 | 0.456 | 0.430 | 0.181 | 0.825 | 0.167 |
| 1388619_at   | AW535398  | radixin                                                                     | Rdx               | 0.629  | 0.541 | 0.909 | 0.995 | 0.377 | 0.088 | 0.833 | 0.431 |
| 1378287_at   | BI297296  | radixin                                                                     | Rdx               | 0.956  | 0.982 | 0.637 | 0.226 | 0.998 | 0.977 | 0.942 | 0.813 |
| 1395465_at   | BF419215  | RAE1 RNA export 1 homolog (S. pombe)                                        | Rae1              | 1.290  | 0.323 | 1.093 | 0.669 | 1.204 | 0.365 | 1.095 | 0.972 |
| 1392464_at   | BM392372  | RAE1 RNA export 1 homolog (S. pombe)                                        | Rae1              | 0.930  | 0.721 | 1.537 | 0.058 | 1.430 | 0.372 | 1.594 | 0.000 |
| 1368217_at   | NM_032067 | ralA binding protein 1                                                      | Ralbp1            | 1.535  | 0.007 | 1.131 | 0.182 | 1.182 | 0.016 | 1.118 | 0.092 |
| 1368218_at   | U28830    | ralA binding protein 1                                                      | Ralbp1            | 1.000  | 0.799 | 0.997 | 0.980 | 1.001 | 0.838 | 0.996 | 0.966 |
| 1389233_at   | BI289596  | RalBP1 associated Eps domain containing protein (predicted)                 | Reps1_predicted   | 0.460  | 0.421 | 0.683 | 0.018 | 0.782 | 0.238 | 0.828 | 0.032 |
| 1375427_at   | AI411580  | RAN binding protein 1 (predicted)                                           | Ranbp1_predicted  | 0.880  | 0.303 | 1.382 | 0.551 | 0.819 | 0.641 | 0.819 | 0.746 |
| 1390577_at   | BF396940  | RAN binding protein 10 (predicted)                                          | Ranbp10_predicted | 1.156  | 0.693 | 1.041 | 0.735 | 1.142 | 0.937 | 1.312 | 0.169 |
| 1373955_at   | BI280339  | RAN binding protein 5 (predicted)                                           | Ranbp5_predicted  | 1.316  | 0.190 | 4.321 | 0.000 | 0.852 | 0.228 | 3.249 | 0.004 |
| 1384551_at   | AI578134  | RAN binding protein 6 (predicted)                                           | Ranbp6_predicted  | 0.627  | 0.039 | 0.898 | 0.074 | 0.613 | 0.215 | 0.827 | 0.265 |
| 1388341_at   | BI285671  | RAN GTPase activating protein 1                                             | Rangap1           | 0.799  | 0.292 | 1.551 | 0.025 | 0.829 | 0.081 | 1.134 | 0.261 |
| 1367590_at   | NM_053439 | RAN, member RAS oncogene family                                             | Ran               | 0.890  | 0.601 | 2.531 | 0.000 | 0.738 | 0.005 | 2.173 | 0.000 |
| 1373933_at   | BF407276  | Rap guanine nucleotide exchange factor (GEF) 2 (predicted)                  | Rapgef2_predicted | 0.957  | 0.680 | 0.964 | 0.476 | 0.804 | 0.886 | 0.927 | 0.112 |
| 1368660_at   | NM_021690 | Rap guanine nucleotide exchange factor (GEF) 3                              | Rapgef3           | 3.007  | 0.070 | 1.020 | 0.453 | 1.243 | 0.642 | 1.017 | 0.046 |
| 1371081_at   | U78517    | Rap guanine nucleotide exchange factor (GEF) 4                              | Rapgef4           | 1.436  | 0.073 | 0.385 | 0.016 | 0.719 | 0.206 | 0.411 | 0.072 |
| 1377529_at   | BF404045  | Rap guanine nucleotide exchange factor (GEF) 4                              | Rapgef4           | 1.255  | 0.548 | 0.678 | 0.329 | 1.159 | 0.619 | 0.696 | 0.243 |
| 1389181_at   | BM389650  | Rap guanine nucleotide exchange factor (GEF) 6 (predicted)                  | Rapgef6_predicted | 0.786  | 0.278 | 0.711 | 0.033 | 0.757 | 0.009 | 0.708 | 0.048 |
| 1378835_at   | AI145398  | Rap guanine nucleotide exchange factor (GEF) 6 (predicted)                  | Rapgef6_predicted | 0.715  | 0.769 | 0.977 | 0.951 | 1.685 | 0.168 | 0.977 | 0.828 |
| 1387928_at   | AF288611  | Rap2 interacting protein                                                    | Rap2ip            | 1.138  | 0.033 | 0.498 | 0.024 | 1.116 | 0.089 | 0.484 | 0.026 |
| 1379552_s_at | AI535169  | Rap2 interacting protein                                                    | Rap2ip            | 1.536  | 0.162 | 0.954 | 0.255 | 1.566 | 0.512 | 0.670 | 0.011 |
| 1373237_at   | BI281233  | Rap2 interacting protein x                                                  | Ripx              | 0.796  | 0.629 | 0.520 | 0.033 | 0.548 | 0.003 | 0.778 | 0.121 |
| 1378194_a_at | BG671338  | rap2 interacting protein x                                                  | Ripx              | 1.053  | 0.992 | 0.975 | 0.130 | 0.699 | 0.038 | 1.264 | 0.505 |
| 1392922_at   | BE116619  | RAP2B, member of RAS oncogene family                                        | Rap2b             | 1.650  | 0.005 | 1.068 | 0.824 | 1.812 | 0.021 | 1.238 | 0.605 |
| 1379397_at   | BE106199  | RAR-related orphan receptor alpha (predicted)                               | Rora_predicted    | 3.475  | 0.001 | 5.636 | 0.013 | 2.535 | 0.051 | 3.746 | 0.077 |
| 1377029_at   | AI235414  | RAR-related orphan receptor alpha (predicted)                               | Rora_predicted    | 1.346  | 0.019 | 1.702 | 0.083 | 2.594 | 0.004 | 1.640 | 0.258 |
| 1371257_at   | BF386897  | RAR-related orphan receptor beta (predicted)                                | Rorb_predicted    | 1.002  | 0.979 | 2.010 | 0.064 | 0.985 | 0.988 | 2.014 | 0.066 |
| 1376949_at   | BE099848  | Ras and a-factor-converting enzyme 1 homolog (S. cerevisiae)                | Rce1              | 1.054  | 0.895 | 2.175 | 0.009 | 0.701 | 0.073 | 1.803 | 0.016 |
| 1372365_at   | BM392293  | Ras and Rab interactor 2 (predicted)                                        | Rin2_predicted    | 1.589  | 0.048 | 0.522 | 0.014 | 2.434 | 0.007 | 0.780 | 0.056 |
| 1374525_at   | BF284017  | Ras association (RalGDS/AF-6) and pleckstrin homology domains 1 (predicted) | Raph1_predicted   | 5.607  | 0.001 | 1.814 | 0.005 | 2.821 | 0.030 | 1.640 | 0.073 |
| 1376658_at   | BF391087  | Ras association (RalGDS/AF-6) and pleckstrin homology domains 1 (predicted) | Raph1_predicted   | 10.028 | 0.013 | 7.152 | 0.015 | 3.219 | 0.025 | 4.161 | 0.040 |
| 1385987_at   | BE098157  | Ras association (RalGDS/AF-6) and pleckstrin homology domains 1 (predicted) | Raph1_predicted   | 0.860  | 0.599 | 1.034 | 0.467 | 0.909 | 0.607 | 0.723 | 0.437 |
| 1373989_at   | AI103943  | Ras association (RalGDS/AF-6) domain family 1                               | Rassf1            | 1.996  | 0.041 | 2.707 | 0.003 | 1.815 | 0.100 | 2.294 | 0.004 |
| 1392688_at   | AI113186  | Ras association (RalGDS/AF-6) domain family 1                               | Rassf1            | 1.000  | 0.978 | 1.006 | 0.797 | 1.272 | 0.200 | 1.005 | 0.974 |
| 1391823_at   | AA956842  | Ras association (RalGDS/AF-6) domain family 3 (predicted)                   | Rassf3_predicted  | 2.218  | 0.048 | 1.057 | 0.786 | 2.038 | 0.040 | 0.681 | 0.488 |
| 1370415_at   | AF002251  | Ras association (RalGDS/AF-6) domain family 5                               | Rassf5            | 1.066  | 0.541 | 1.003 | 0.824 | 1.005 | 0.522 | 1.000 | 0.529 |
| 1379315_at   | BM385768  | Ras association (RalGDS/AF-6) domain family 7 (predicted)                   | Rassf7_predicted  | 1.006  | 0.969 | 2.458 | 0.043 | 0.849 | 0.881 | 1.947 | 0.099 |
| 1373624_at   | AA945713  | Ras association (RalGDS/AF-6) domain family 8 (predicted)                   | Rassf8_predicted  | 1.192  | 0.274 | 1.582 | 0.016 | 0.622 | 0.365 | 1.190 | 0.281 |
| 1398787_at   | NM_013216 | Ras homolog enriched in brain                                               | Rheb              | 0.852  | 0.504 | 1.282 | 0.100 | 0.878 | 0.358 | 1.364 | 0.029 |

|              |           |                                                                                       |                   |        |       |        |       |        |       |        |       |
|--------------|-----------|---------------------------------------------------------------------------------------|-------------------|--------|-------|--------|-------|--------|-------|--------|-------|
| 1399027_at   | AI408053  | ras homolog gene family, member A                                                     | Rhoa              | 0.930  | 0.770 | 1.584  | 0.015 | 0.761  | 0.389 | 1.344  | 0.020 |
| 1370130_at   | NM_057132 | ras homolog gene family, member A                                                     | Rhoa              | 0.898  | 0.978 | 1.684  | 0.298 | 0.900  | 0.353 | 1.177  | 0.749 |
| 1369958_at   | NM_022542 | ras homolog gene family, member B                                                     | Rhob              | 2.315  | 0.289 | 0.547  | 0.102 | 3.064  | 0.208 | 0.422  | 0.017 |
| 1393287_at   | AW915147  | Ras homolog gene family, member C (predicted)                                         | Rhoc_predicted    | 1.921  | 0.001 | 1.050  | 0.338 | 5.224  | 0.003 | 1.097  | 0.576 |
| 1371659_at   | AA891940  | ras homolog gene family, member C (predicted)                                         | Rhoc_predicted    | 2.849  | 0.003 | 1.761  | 0.083 | 3.075  | 0.001 | 1.450  | 0.053 |
| 1382197_at   | AA955648  | ras homolog gene family, member D (predicted)                                         | Rhod_predicted    | 1.402  | 0.041 | 2.616  | 0.019 | 2.096  | 0.108 | 2.580  | 0.021 |
| 1389227_at   | BG375902  | Ras homolog gene family, member G                                                     | Rhog              | 2.126  | 0.067 | 1.776  | 0.038 | 1.675  | 0.013 | 1.733  | 0.049 |
| 1367874_at   | AA849961  | ras homolog gene family, member Q                                                     | Rhoq              | 2.963  | 0.028 | 1.720  | 0.032 | 2.010  | 0.063 | 1.285  | 0.335 |
| 1386967_at   | NM_053522 | ras homolog gene family, member Q                                                     | Rhoq              | 1.146  | 0.636 | 1.606  | 0.016 | 1.010  | 0.873 | 1.179  | 0.018 |
| 1372731_at   | AI228628  | ras homolog gene family, member T1 (predicted)                                        | Rhot1_predicted   | 0.719  | 0.422 | 1.452  | 0.024 | 0.612  | 0.003 | 0.996  | 0.387 |
| 1374534_at   | AI233243  | ras homolog gene family, member T2                                                    | Rhot2             | 0.818  | 0.210 | 1.135  | 0.916 | 0.759  | 0.347 | 0.842  | 0.900 |
| 1397581_at   | BF416022  | ras homolog gene family, member V                                                     | Rhov              | 4.135  | 0.063 | 2.862  | 0.031 | 3.307  | 0.003 | 2.384  | 0.020 |
| 1370627_at   | AF097887  | ras homolog gene family, member V                                                     | Rhov              | 1.269  | 0.577 | 1.069  | 0.203 | 0.999  | 0.994 | 0.998  | 0.965 |
| 1370085_at   | NM_013135 | RAS p21 protein activator 1                                                           | Rasa1             | 0.904  | 0.874 | 0.960  | 0.893 | 0.997  | 0.991 | 0.870  | 0.694 |
| 1378740_at   | AI577567  | RAS protein activator like 2 (predicted)                                              | Rasal2_predicted  | 1.555  | 0.135 | 1.928  | 0.046 | 0.855  | 0.651 | 1.356  | 0.083 |
| 1387806_at   | NM_134346 | RAS related protein 1b                                                                | Rap1b             | 1.319  | 0.359 | 0.821  | 0.025 | 1.307  | 0.213 | 0.923  | 0.056 |
| 1387908_at   | AF239157  | RAS, dexamethasone-induced 1                                                          | Rasd1             | 8.685  | 0.004 | 2.229  | 0.013 | 3.715  | 0.007 | 1.750  | 0.073 |
| 1370976_at   | BE118966  | Ras-GTPase-activating protein SH3-domain binding protein                              | G3bp              | 1.457  | 0.108 | 1.904  | 0.001 | 1.512  | 0.022 | 1.896  | 0.004 |
| 1389821_at   | AA800815  | Ras-induced senescence 1                                                              | Ris1              | 1.115  | 0.252 | 1.129  | 0.577 | 0.898  | 0.212 | 0.929  | 0.299 |
| 1389037_at   | BM986252  | Ras-like without CAAX 1 (predicted)                                                   | Rit1_predicted    | 1.004  | 0.509 | 1.000  | 0.912 | 0.913  | 0.654 | 0.950  | 0.911 |
| 1373774_at   | AI412619  | Ras-like without CAAX 2                                                               | Rit2              | 0.336  | 0.118 | 0.144  | 0.000 | 0.425  | 0.007 | 0.145  | 0.000 |
| 1383699_at   | BG673521  | Ras-like without CAAX 2                                                               | Rit2              | 0.933  | 0.993 | 0.536  | 0.010 | 1.070  | 0.994 | 0.538  | 0.016 |
| 1388332_at   | AA799542  | Ras-related C3 botulinum toxin substrate 1                                            | Rac1              | 1.096  | 0.330 | 0.654  | 0.001 | 1.113  | 0.076 | 0.832  | 0.020 |
| 1372513_at   | AI103616  | ras-related C3 botulinum toxin substrate 1                                            | Rac1              | 1.402  | 0.461 | 3.112  | 0.002 | 1.104  | 0.835 | 2.078  | 0.024 |
| 1367736_at   | NM_053973 | Ras-related GTP binding A                                                             | Rraga             | 0.782  | 0.369 | 0.591  | 0.005 | 0.774  | 0.162 | 0.708  | 0.121 |
| 1369696_at   | NM_053972 | Ras-related GTP binding B                                                             | RragB             | 0.341  | 0.009 | 0.268  | 0.006 | 0.334  | 0.000 | 0.311  | 0.026 |
| 1376881_at   | AW528057  | Ras-related GTP binding B                                                             | RragB             | 0.203  | 0.009 | 0.090  | 0.003 | 0.127  | 0.038 | 0.103  | 0.042 |
| 1377791_at   | BI299500  | Ras-related GTP binding B                                                             | RragB             | 0.256  | 0.031 | 0.070  | 0.003 | 0.158  | 0.002 | 0.205  | 0.019 |
| 1371723_at   | BE110635  | Ras-related GTP binding C (predicted)                                                 | Rragc_predicted   | 1.816  | 0.045 | 3.039  | 0.000 | 1.402  | 0.024 | 3.303  | 0.007 |
| 1382537_at   | AA899991  | Ras-related GTP binding C (predicted)                                                 | Rragc_predicted   | 1.075  | 0.159 | 2.463  | 0.025 | 0.682  | 0.288 | 2.367  | 0.048 |
| 1373427_at   | BI288816  | Ras-related GTP binding D (predicted)                                                 | Rragd_predicted   | 1.456  | 0.129 | 6.298  | 0.000 | 1.135  | 0.308 | 4.247  | 0.001 |
| 1388615_at   | AI410112  | RAS-related protein 1a                                                                | Rap1a             | 0.962  | 0.724 | 1.313  | 0.010 | 0.833  | 0.239 | 1.273  | 0.003 |
| 1387915_at   | AF367467  | Ratsg2                                                                                | Ratsg2            | 1.002  | 0.690 | 1.621  | 0.009 | 1.117  | 0.386 | 1.391  | 0.023 |
| 1372427_at   | AI170542  | RAVER1 homolog (human)                                                                | Raver1h           | 0.767  | 0.889 | 0.618  | 0.082 | 1.007  | 0.896 | 0.680  | 0.012 |
| 1385194_at   | BG671668  | RB1-inducible coiled-coil 1 (predicted)                                               | Rb1cc1_predicted  | 1.482  | 0.113 | 1.596  | 0.080 | 1.976  | 0.114 | 1.638  | 0.056 |
| 1379449_at   | BG670920  | RB1-inducible coiled-coil 1 (predicted)                                               | Rb1cc1_predicted  | 1.241  | 0.385 | 0.831  | 0.052 | 1.702  | 0.102 | 0.893  | 0.082 |
| 1374331_at   | AI178068  | rcd1 (required for cell differentiation) homolog 1 (S. pombe)                         | Rqcd1             | 1.045  | 0.387 | 0.587  | 0.014 | 1.101  | 0.036 | 0.879  | 0.190 |
| 1392544_at   | AI044879  | rcd1 (required for cell differentiation) homolog 1 (S. pombe)                         | Rqcd1             | 0.812  | 0.799 | 0.616  | 0.125 | 0.886  | 0.199 | 0.641  | 0.095 |
| 1372290_at   | BI275979  | RD RNA-binding protein                                                                | Rdbp              | 0.623  | 0.056 | 1.352  | 0.034 | 0.763  | 0.016 | 1.298  | 0.356 |
| 1375173_at   | BM392302  | RDCR-0918-3 protein                                                                   | LOC246120         | 1.511  | 0.037 | 1.421  | 0.013 | 1.266  | 0.042 | 1.516  | 0.002 |
| 1369922_at   | NM_139255 | RDCR-0918-3 protein                                                                   | LOC246120         | 1.409  | 0.079 | 0.680  | 0.322 | 1.163  | 0.845 | 1.952  | 0.920 |
| 1382400_at   | BE104395  | rearranged L-myc fusion sequence (predicted)                                          | Rlf_predicted     | 1.121  | 0.233 | 3.130  | 0.005 | 0.490  | 0.029 | 2.926  | 0.004 |
| 1367701_at   | NM_031646 | receptor (calcitonin) activity modifying protein 2                                    | Ramp2             | 0.880  | 0.963 | 1.808  | 0.008 | 0.978  | 0.511 | 0.513  | 0.058 |
| 1381279_at   | BF412519  | receptor (TNFRSF)-interacting serine-threonine kinase 2                               | Ripk2             | 48.629 | 0.005 | 32.074 | 0.000 | 35.594 | 0.002 | 10.350 | 0.001 |
| 1371481_at   | BI274372  | receptor accessory protein 5 (predicted)                                              | Reep5_predicted   | 0.791  | 0.502 | 1.545  | 0.002 | 0.933  | 0.334 | 1.250  | 0.017 |
| 1372841_at   | BG376982  | receptor accessory protein 6                                                          | Reep6             | 0.766  | 0.058 | 0.975  | 0.307 | 0.762  | 0.058 | 0.991  | 0.098 |
| 1380938_at   | BE106206  | receptor interacting protein kinase 5                                                 | Ripk5             | 0.670  | 0.066 | 0.494  | 0.000 | 0.838  | 0.024 | 0.492  | 0.003 |
| 1395736_at   | BG666455  | receptor interacting protein kinase 5                                                 | Ripk5             | 0.719  | 0.200 | 0.568  | 0.011 | 0.465  | 0.160 | 0.396  | 0.037 |
| 1392588_at   | BG664535  | receptor interacting protein kinase 5                                                 | Ripk5             | 0.769  | 0.382 | 0.508  | 0.053 | 0.479  | 0.003 | 0.431  | 0.008 |
| 1379285_at   | AA819788  | receptor transporter protein 4 (predicted)                                            | Rtp4_predicted    | 17.228 | 0.003 | 11.762 | 0.000 | 35.566 | 0.000 | 30.234 | 0.000 |
| 1373028_at   | BE113287  | receptor-like tyrosine kinase                                                         | Ryk               | 0.693  | 0.475 | 0.474  | 0.061 | 0.677  | 0.568 | 0.509  | 0.045 |
| 1379973_at   | AW530847  | Receptor-like tyrosine kinase                                                         | Ryk               | 0.917  | 0.755 | 1.046  | 0.358 | 1.373  | 0.941 | 0.943  | 0.067 |
| 1371101_at   | AB073721  | receptor-like tyrosine kinase                                                         | Ryk               | 0.659  | 0.958 | 0.647  | 0.779 | 0.668  | 0.909 | 0.390  | 0.590 |
| 1389705_at   | AI138061  | recombination activating gene 1 activating protein 1 (predicted)                      | Rag1ap1_predicted | 1.185  | 0.545 | 0.961  | 0.525 | 1.032  | 0.850 | 1.153  | 0.080 |
| 1374517_at   | AA891612  | RecQ protein-like                                                                     | Recq1             | 0.603  | 0.379 | 0.836  | 0.140 | 0.561  | 0.034 | 0.697  | 0.010 |
| 1393087_at   | BI277503  | RecQ protein-like 5 (predicted)                                                       | Recq15_predicted  | 1.068  | 0.449 | 0.817  | 0.066 | 1.214  | 0.285 | 0.824  | 0.437 |
| 1370938_at   | AI535144  | reg I binding protein I                                                               | Rbp1              | 0.578  | 0.047 | 0.423  | 0.040 | 0.524  | 0.029 | 0.503  | 0.048 |
| 1368629_at   | NM_012641 | regenerating islet-derived 1                                                          | Reg1              | 0.829  | 0.942 | 1.592  | 0.447 | 0.999  | 0.956 | 1.293  | 0.947 |
| 1367904_at   | NM_019278 | regulated endocrine-specific protein 18                                               | Resp18            | 0.920  | 0.684 | 0.514  | 0.006 | 0.842  | 0.104 | 0.680  | 0.000 |
| 1369333_a_at | NM_053945 | regulating synaptic membrane exocytosis 2                                             | Rims2             | 0.579  | 0.155 | 3.132  | 0.008 | 0.804  | 0.385 | 1.315  | 0.300 |
| 1383279_at   | BE119554  | regulator of chromosome condensation (RCC1) and BTB (POZ) domain containing protein 2 | Rcbbt2            | 0.655  | 0.084 | 0.476  | 0.087 | 0.774  | 0.133 | 0.560  | 0.201 |

|              |           |                                                                                                                                                                  |                                                   |       |       |        |       |       |       |       |       |
|--------------|-----------|------------------------------------------------------------------------------------------------------------------------------------------------------------------|---------------------------------------------------|-------|-------|--------|-------|-------|-------|-------|-------|
| 1386610_at   | BG665272  | regulator of chromosome condensation (RCC1) and BTB (POZ) domain containing protein 2                                                                            | Rcbtb2                                            | 0.596 | 0.362 | 0.934  | 0.915 | 0.724 | 0.477 | 0.929 | 0.997 |
| 1371563_at   | BE109154  | regulator of chromosome condensation 2 (predicted)                                                                                                               | Rcc2_predicted                                    | 0.857 | 0.098 | 1.547  | 0.056 | 1.035 | 0.083 | 1.860 | 0.003 |
| 1373777_at   | BF391820  | Regulator of G-protein signaling 16                                                                                                                              | Rgs16                                             | 0.303 | 0.003 | 0.170  | 0.002 | 0.365 | 0.000 | 0.213 | 0.024 |
| 1394280_at   | AW140991  | regulator of G-protein signaling 17 (predicted)                                                                                                                  | Rgs17_predicted                                   | 0.485 | 0.038 | 3.010  | 0.004 | 0.582 | 0.076 | 3.245 | 0.009 |
| 1398483_at   | AI229118  | Regulator of G-protein signaling 17 (predicted)                                                                                                                  | Rgs17_predicted                                   | 0.673 | 0.111 | 1.605  | 0.060 | 0.691 | 0.118 | 1.589 | 0.020 |
| 1391075_at   | AI179271  | regulator of G-protein signaling 17 (predicted)                                                                                                                  | Rgs17_predicted                                   | 0.764 | 0.912 | 3.664  | 0.001 | 0.718 | 0.361 | 2.773 | 0.006 |
| 1387074_at   | AY043246  | regulator of G-protein signaling 2                                                                                                                               | Rgs2                                              | 1.492 | 0.166 | 1.093  | 0.289 | 2.224 | 0.089 | 0.867 | 0.799 |
| 1368505_at   | NM_017214 | regulator of G-protein signaling 4                                                                                                                               | Rgs4                                              | 1.360 | 0.128 | 1.385  | 0.061 | 1.042 | 0.458 | 1.446 | 0.104 |
| 1368506_at   | U27767    | regulator of G-protein signaling 4                                                                                                                               | Rgs4                                              | 1.815 | 0.303 | 2.127  | 0.066 | 0.665 | 0.169 | 1.742 | 0.058 |
| 1368373_at   | NM_019343 | regulator of G-protein signaling 7                                                                                                                               | Rgs7                                              | 0.606 | 0.004 | 1.438  | 0.058 | 0.763 | 0.191 | 1.402 | 0.042 |
| 1368500_a_at | NM_019224 | regulator of G-protein signaling 9                                                                                                                               | Rgs9                                              | 2.038 | 0.000 | 1.356  | 0.142 | 1.170 | 0.161 | 0.849 | 0.139 |
| 1382090_at   | AI070376  | Regulator of G-protein signaling 9                                                                                                                               | Rgs9                                              | 2.475 | 0.017 | 1.320  | 0.282 | 1.206 | 0.905 | 0.504 | 0.146 |
| 1376443_at   | BF419009  | Regulator of G-protein signalling 3                                                                                                                              | Rgs3                                              | 1.007 | 0.981 | 0.934  | 0.257 | 0.954 | 0.312 | 0.784 | 0.246 |
| 1392036_at   | BE102087  | Regulator of nonsense transcripts 1 (predicted)                                                                                                                  | Rent1_predicted                                   | 0.884 | 0.234 | 1.067  | 0.659 | 0.881 | 0.181 | 0.695 | 0.034 |
| 1377152_at   | AI111991  | regulatory factor X, 1 (influences HLA class II expression) (predicted)                                                                                          | Rfx1_predicted                                    | 2.027 | 0.542 | 1.968  | 0.023 | 1.240 | 0.695 | 1.590 | 0.165 |
| 1382553_at   | AI137120  | Regulatory factor X, 3 (influences HLA class II expression)                                                                                                      | Rfx3                                              | 1.498 | 0.317 | 0.710  | 0.364 | 1.664 | 0.243 | 0.681 | 0.056 |
| 1389515_at   | AW251269  | regulatory factor X-associated ankyrin-containing protein                                                                                                        | Rfxank                                            | 0.616 | 0.242 | 1.222  | 0.517 | 0.481 | 0.004 | 1.086 | 0.085 |
| 1372133_at   | AA955287  | related RAS viral (r-ras) oncogene homolog 2                                                                                                                     | Rras2                                             | 1.835 | 0.176 | 3.031  | 0.003 | 2.519 | 0.003 | 2.677 | 0.010 |
| 1382058_at   | BI292115  | related RAS viral (r-ras) oncogene homolog 2                                                                                                                     | Rras2                                             | 1.185 | 0.354 | 2.932  | 0.011 | 1.304 | 0.291 | 2.815 | 0.009 |
| 1380655_at   | AI317878  | renal tumor antigen                                                                                                                                              | Rage                                              | 1.086 | 0.993 | 2.429  | 0.159 | 1.106 | 0.923 | 1.552 | 0.444 |
| 1370910_at   | BF283113  | replication factor C (activator 1) 2                                                                                                                             | Rfc2                                              | 0.331 | 0.007 | 0.697  | 0.005 | 0.422 | 0.001 | 0.779 | 0.081 |
| 1388458_at   | BI291451  | replication factor C (activator 1) 4 (predicted)                                                                                                                 | Rfc4_predicted                                    | 0.892 | 0.695 | 4.179  | 0.003 | 0.750 | 0.502 | 2.750 | 0.043 |
| 1374919_at   | BE103543  | Replication factor C 1                                                                                                                                           | Recc1                                             | 1.427 | 0.129 | 1.623  | 0.072 | 2.299 | 0.110 | 1.428 | 0.011 |
| 1388135_at   | BM385924  | replication protein A2                                                                                                                                           | Rpa2                                              | 1.511 | 0.068 | 1.016  | 0.981 | 0.999 | 0.982 | 0.997 | 0.989 |
| 1398308_at   | BM383451  | replication protein A3 (predicted)                                                                                                                               | Rpa3_predicted                                    | 0.702 | 0.026 | 0.604  | 0.015 | 0.682 | 0.018 | 0.894 | 0.945 |
| 1368080_at   | NM_054008 | response gene to complement 32                                                                                                                                   | Rgc32                                             | 1.002 | 0.353 | 15.849 | 0.006 | 1.020 | 0.228 | 5.615 | 0.045 |
| 1389972_at   | AA943681  | Response gene to complement 32                                                                                                                                   | Rgc32                                             | 1.001 | 0.985 | 15.347 | 0.002 | 0.926 | 0.025 | 9.890 | 0.014 |
| 1367993_at   | NM_031745 | restin (Reed-Steinberg cell-expressed intermediate filament-associated protein)                                                                                  | Rsn                                               | 0.794 | 0.105 | 1.036  | 0.643 | 0.343 | 0.054 | 1.315 | 0.349 |
| 1394241_at   | BF401902  | restin (Reed-Steinberg cell-expressed intermediate filament-associated protein)                                                                                  | Rsn                                               | 0.965 | 0.916 | 1.340  | 0.065 | 0.659 | 0.111 | 0.976 | 0.427 |
| 1388208_a_at | AJ299017  | ret proto-oncogene                                                                                                                                               | Ret                                               | 0.629 | 0.097 | 0.947  | 0.929 | 0.715 | 0.185 | 0.375 | 0.017 |
| 1371112_at   | AJ299017  | ret proto-oncogene                                                                                                                                               | Ret                                               | 0.740 | 0.287 | 1.064  | 0.523 | 0.379 | 0.225 | 0.891 | 0.462 |
| 1370989_at   | AI639318  | ret proto-oncogene                                                                                                                                               | Ret                                               | 0.666 | 0.620 | 0.269  | 0.000 | 0.395 | 0.025 | 0.290 | 0.010 |
| 1390011_at   | BI296601  | Retbindin (predicted)                                                                                                                                            | Rtbnd_predicted                                   | 1.016 | 0.969 | 0.999  | 0.851 | 1.000 | 0.576 | 0.956 | 0.699 |
| 1375921_at   | BF281577  | Reticulocalbin 1 (predicted)                                                                                                                                     | Rcn1_predicted                                    | 0.794 | 0.015 | 0.970  | 0.755 | 0.685 | 0.014 | 0.779 | 0.303 |
| 1382767_at   | AI175752  | Reticulocalbin 1 (predicted)                                                                                                                                     | Rcn1_predicted                                    | 0.635 | 0.044 | 1.235  | 0.751 | 1.549 | 0.292 | 1.506 | 0.340 |
| 1393643_at   | AI112962  | reticulocalbin 1 (predicted)                                                                                                                                     | Rcn1_predicted                                    | 0.832 | 0.061 | 0.997  | 0.983 | 0.764 | 0.125 | 0.924 | 0.628 |
| 1387081_at   | NM_017132 | reticulocalbin 2                                                                                                                                                 | Rcn2                                              | 2.076 | 0.007 | 4.435  | 0.001 | 1.865 | 0.460 | 4.875 | 0.001 |
| 1377512_at   | BI291272  | Reticulocalbin 2                                                                                                                                                 | Rcn2                                              | 1.572 | 0.856 | 1.218  | 0.568 | 2.294 | 0.364 | 1.276 | 0.202 |
| 1368097_a_at | NM_053865 | reticulon 1                                                                                                                                                      | Rtn1                                              | 0.421 | 0.015 | 0.320  | 0.001 | 0.638 | 0.002 | 0.424 | 0.002 |
| 1372527_at   | BG380684  | reticulon 2 (Z-band associated protein)                                                                                                                          | Rtn2                                              | 0.933 | 0.684 | 0.580  | 0.008 | 1.022 | 0.506 | 0.624 | 0.036 |
| 1373571_at   | AI170276  | reticulon 3                                                                                                                                                      | Rtn3                                              | 0.879 | 0.098 | 0.682  | 0.007 | 0.790 | 0.270 | 0.656 | 0.019 |
| 1387340_at   | AI409824  | reticulon 3                                                                                                                                                      | Rtn3                                              | 0.696 | 0.343 | 1.086  | 0.056 | 0.921 | 0.653 | 0.927 | 0.550 |
| 1368807_at   | NM_080909 | reticulon 3                                                                                                                                                      | Rtn3                                              | 1.116 | 0.824 | 1.155  | 0.612 | 1.124 | 0.573 | 0.899 | 0.109 |
| 1388027_a_at | AF051335  | reticulon 4                                                                                                                                                      | Rtn4                                              | 0.903 | 0.789 | 0.605  | 0.085 | 1.495 | 0.592 | 1.163 | 0.509 |
| 1368888_a_at | AJ242963  | reticulon 4                                                                                                                                                      | Rtn4                                              | 0.946 | 0.817 | 0.959  | 0.645 | 1.122 | 0.440 | 1.499 | 0.014 |
| 1373008_x_at | BF386649  | reticulon 4 receptor                                                                                                                                             | Rtn4r                                             | 0.602 | 0.061 | 1.087  | 0.304 | 0.593 | 0.061 | 1.005 | 0.812 |
| 1378306_at   | AW529689  | Retinal S-antigen                                                                                                                                                | Sag                                               | 0.920 | 0.760 | 0.519  | 0.126 | 0.937 | 0.579 | 0.503 | 0.126 |
| 1391091_at   | AI406286  | retinitis pigmentosa 1 homolog (human) /// similar to cylindromatosis (turban tumor syndrome) (predicted)                                                        | Rp1h ///<br>RGD1565647_predicted                  | 2.465 | 0.024 | 1.941  | 0.048 | 2.359 | 0.004 | 2.097 | 0.010 |
| 1379287_at   | BF391639  | retinitis pigmentosa 1 homolog (human) /// similar to cylindromatosis (turban tumor syndrome) (predicted) /// similar to cylindromatosis (turban tumor syndrome) | Rp1h ///<br>RGD1565647_predicted ///<br>LOC498035 | 1.195 | 0.066 | 1.005  | 0.908 | 1.073 | 0.911 | 1.000 | 0.996 |
| 1385806_at   | AA996771  | retinitis pigmentosa 9 homolog (human) (predicted)                                                                                                               | Rp9h_predicted                                    | 1.000 | 1.000 | 1.036  | 0.508 | 1.001 | 1.000 | 1.014 | 0.799 |
| 1377702_at   | BG380173  | Retinoblastoma 1                                                                                                                                                 | Rb1                                               | 0.677 | 0.289 | 0.188  | 0.000 | 1.970 | 0.012 | 0.418 | 0.007 |
| 1388185_at   | AI178012  | retinoblastoma 1                                                                                                                                                 | Rb1                                               | 1.515 | 0.426 | 0.456  | 0.052 | 1.158 | 0.297 | 0.579 | 0.029 |
| 1381323_at   | BG381396  | retinoblastoma binding protein 5 (predicted)                                                                                                                     | Rbbp5_predicted                                   | 1.168 | 0.316 | 1.331  | 0.032 | 1.009 | 0.945 | 0.918 | 0.170 |
| 1376947_at   | AI178158  | retinoblastoma binding protein 6                                                                                                                                 | Rbbp6                                             | 1.152 | 0.184 | 1.457  | 0.056 | 2.061 | 0.004 | 1.476 | 0.025 |
| 1378544_at   | BE117471  | retinoblastoma binding protein 6                                                                                                                                 | Rbbp6                                             | 1.303 | 0.220 | 1.147  | 0.257 | 1.677 | 0.125 | 1.033 | 0.497 |
| 1395965_at   | BI298589  | Retinoblastoma binding protein 6                                                                                                                                 | Rbbp6                                             | 0.746 | 0.240 | 0.269  | 0.015 | 0.823 | 0.070 | 0.523 | 0.030 |
| 1375541_at   | AA900525  | Retinoblastoma binding protein 6                                                                                                                                 | Rbbp6                                             | 1.000 | 0.435 | 0.990  | 0.593 | 0.999 | 0.851 | 0.912 | 0.533 |
| 1390941_at   | BI277540  | retinoblastoma binding protein 6                                                                                                                                 | Rbbp6                                             | 1.520 | 0.699 | 1.275  | 0.274 | 1.589 | 0.555 | 1.091 | 0.354 |



|              |           |                                                                                         |                      |         |       |        |       |         |       |        |       |
|--------------|-----------|-----------------------------------------------------------------------------------------|----------------------|---------|-------|--------|-------|---------|-------|--------|-------|
| 1398768_at   | NM_031816 | retinoblastoma binding protein 7                                                        | Rbbp7                | 0.856   | 0.070 | 1.035  | 0.667 | 0.688   | 0.021 | 0.887  | 0.676 |
| 1394033_at   | AA956258  | retinoblastoma binding protein 9                                                        | Rbbp9                | 0.462   | 0.161 | 0.504  | 0.025 | 0.789   | 0.582 | 0.881  | 0.117 |
| 1368403_at   | NM_031094 | retinoblastoma-like 2                                                                   | Rbl2                 | 0.357   | 0.007 | 0.537  | 0.065 | 0.490   | 0.005 | 0.543  | 0.108 |
| 1378190_at   | AA945871  | Retinoblastoma-like 2                                                                   | Rbl2                 | 0.999   | 0.875 | 1.003  | 0.994 | 0.997   | 0.792 | 1.322  | 0.984 |
| 1373966_at   | BF406242  | Retinoic acid induced 1 (predicted)                                                     | Rai1_predicted       | 0.761   | 0.039 | 1.091  | 0.059 | 0.735   | 0.044 | 1.004  | 0.510 |
| 1389263_at   | AI234852  | retinoic acid induced 14                                                                | Rai14                | 2.276   | 0.165 | 1.021  | 0.651 | 1.311   | 0.790 | 1.223  | 0.773 |
| 1373369_at   | AI406500  | Retinoic acid induced 17 (predicted)                                                    | Rai17_predicted      | 1.999   | 0.003 | 0.965  | 0.518 | 1.356   | 0.031 | 0.946  | 0.303 |
| 1389927_at   | BI303536  | Retinoic acid induced 17 (predicted)                                                    | Rai17_predicted      | 1.455   | 0.049 | 2.481  | 0.021 | 1.293   | 0.101 | 1.622  | 0.030 |
| 1384557_at   | AI136444  | Retinoic acid induced 17 (predicted)                                                    | Rai17_predicted      | 1.122   | 0.653 | 2.135  | 0.683 | 1.628   | 0.028 | 2.780  | 0.115 |
| 1376755_at   | BF419646  | retinoic acid receptor, beta                                                            | Rarb                 | 0.993   | 0.982 | 1.582  | 0.152 | 0.996   | 0.933 | 1.445  | 0.043 |
| 1371668_at   | BI285959  | Retinoid X receptor alpha                                                               | Rxra                 | 0.576   | 0.023 | 0.915  | 0.826 | 0.392   | 0.003 | 0.662  | 0.132 |
| 1389051_at   | BI274189  | retinoid X receptor beta                                                                | Rxrb                 | 1.108   | 0.230 | 1.173  | 0.636 | 1.329   | 0.074 | 1.013  | 0.661 |
| 1367939_at   | NM_012733 | retinol binding protein 1, cellular                                                     | Rbp1                 | 2.038   | 0.093 | 4.154  | 0.001 | 2.150   | 0.017 | 3.536  | 0.003 |
| 1387766_a_at | NM_012640 | retinol binding protein 2, cellular                                                     | Rbp2                 | 1.225   | 0.207 | 0.997  | 0.656 | 0.830   | 0.915 | 1.024  | 0.971 |
| 1373918_at   | BG374035  | retinol dehydrogenase 11                                                                | Rdh11                | 0.614   | 0.457 | 0.561  | 0.016 | 0.444   | 0.008 | 0.702  | 0.019 |
| 1382949_at   | BM386727  | Retinol dehydrogenase 12 (predicted)                                                    | Rdh12_predicted      | 1.000   | 0.981 | 0.991  | 0.068 | 0.999   | 0.984 | 1.066  | 0.301 |
| 1370986_s_at | AW535280  | Retroviral-like ovarian specific transcript 30-1 mRNA                                   | ---                  | 1.297   | 0.937 | 0.880  | 0.587 | 1.347   | 0.129 | 0.940  | 0.055 |
| 1388247_at   | U48828    | Retroviral-like ovarian specific transcript 30-1 mRNA                                   | ---                  | 1.066   | 0.948 | 1.124  | 0.432 | 1.109   | 0.114 | 0.953  | 0.588 |
| 1371197_at   | U48828    | Retroviral-like ovarian specific transcript 30-1 mRNA                                   | ---                  | 1.109   | 0.995 | 0.634  | 0.205 | 0.999   | 0.984 | 1.025  | 0.206 |
| 1398494_at   | BF404279  | REV1-like ( <i>S. cerevisiae</i> ) (predicted)                                          | Rev11_predicted      | 1.913   | 0.008 | 3.741  | 0.009 | 1.017   | 0.673 | 2.022  | 0.349 |
| 1383347_at   | BM384011  | REV1-like ( <i>S. cerevisiae</i> ) (predicted)                                          | Rev11_predicted      | 0.942   | 0.609 | 0.965  | 0.636 | 1.269   | 0.207 | 0.996  | 0.636 |
| 1372266_at   | BI281607  | REV3-like, catalytic subunit of DNA polymerase zeta RAD54 like ( <i>S. cerevisiae</i> ) | Rev3l                | 1.321   | 0.039 | 0.827  | 0.126 | 1.424   | 0.109 | 1.017  | 0.571 |
| 1378618_at   | BF392356  | REV3-like, catalytic subunit of DNA polymerase zeta RAD54 like ( <i>S. cerevisiae</i> ) | Rev3l                | 1.054   | 0.821 | 0.794  | 0.198 | 1.043   | 0.035 | 1.158  | 0.899 |
| 1374448_at   | AW523759  | reversion-inducing-cysteine-rich protein with kazal motifs (predicted)                  | Reck_predicted       | 0.913   | 0.145 | 1.027  | 0.851 | 0.995   | 0.867 | 1.199  | 0.073 |
| 1372738_at   | BE109600  | REX1, RNA exonuclease 1 homolog ( <i>S. cerevisiae</i> )                                | Rexo1                | 0.813   | 0.110 | 1.487  | 0.276 | 0.981   | 0.174 | 1.298  | 0.282 |
| 1398679_at   | AI639098  | REX2, RNA exonuclease 2 homolog ( <i>S. cerevisiae</i> )                                | Rexo2                | 1.146   | 0.143 | 1.099  | 0.932 | 1.017   | 0.447 | 1.140  | 0.099 |
| 1371724_at   | AA799631  | REX2, RNA exonuclease 2 homolog ( <i>S. cerevisiae</i> )                                | Rexo2                | 0.844   | 0.190 | 0.929  | 0.089 | 0.878   | 0.062 | 0.875  | 0.156 |
| 1388912_at   | AI237143  | REX4, RNA exonuclease 4 homolog ( <i>S. cerevisiae</i> )                                | Rexo4                | 1.001   | 0.702 | 1.140  | 0.124 | 0.791   | 0.253 | 1.012  | 0.949 |
| 1392244_at   | AA818153  | RGD1559433 (predicted)                                                                  | RGD1559433_predicted | 0.338   | 0.037 | 0.636  | 0.231 | 0.720   | 0.311 | 1.424  | 0.189 |
| 1397611_at   | AW525619  | RGD1559591 (predicted)                                                                  | RGD1559591_predicted | 111.128 | 0.000 | 19.798 | 0.008 | 246.483 | 0.000 | 32.460 | 0.004 |
| 1397518_at   | BG372421  | RGD1559665 (predicted)                                                                  | RGD1559665_predicted | 1.244   | 0.065 | 0.853  | 0.443 | 1.042   | 0.070 | 1.039  | 0.889 |
| 1398708_at   | BI297590  | RGD1559718 (predicted)                                                                  | RGD1559718_predicted | 1.129   | 0.064 | 1.158  | 0.290 | 0.702   | 0.099 | 1.192  | 0.217 |
| 1398341_at   | BI295767  | RGD1559720 (predicted)                                                                  | RGD1559720_predicted | 0.988   | 0.403 | 1.198  | 0.772 | 0.865   | 0.771 | 1.391  | 0.021 |
| 1373030_at   | AJ225654  | RGD1559728 (predicted)                                                                  | RGD1559728_predicted | 1.028   | 0.901 | 0.632  | 0.002 | 0.786   | 0.134 | 0.846  | 0.006 |
| 1389489_at   | BE109900  | RGD1559738 (predicted)                                                                  | RGD1559738_predicted | 1.761   | 0.127 | 0.889  | 0.491 | 1.569   | 0.090 | 1.275  | 0.136 |
| 1389243_at   | AI599794  | RGD1559893 (predicted)                                                                  | RGD1559893_predicted | 0.753   | 0.345 | 0.830  | 0.239 | 0.892   | 0.610 | 0.931  | 0.405 |
| 1374852_at   | AI407613  | RGD1559909 (predicted)                                                                  | RGD1559909_predicted | 0.511   | 0.009 | 0.688  | 0.021 | 0.516   | 0.008 | 0.632  | 0.014 |
| 1372751_at   | BM390320  | RGD1560018 (predicted)                                                                  | RGD1560018_predicted | 0.999   | 0.916 | 0.886  | 0.160 | 1.003   | 0.502 | 0.833  | 0.047 |
| 1381947_at   | AI169006  | RGD1560210 (predicted)                                                                  | RGD1560210_predicted | 1.055   | 0.392 | 1.096  | 0.142 | 1.045   | 0.801 | 0.880  | 0.647 |
| 1392779_at   | BF551105  | RGD1560223 (predicted)                                                                  | RGD1560223_predicted | 1.008   | 0.701 | 0.991  | 0.119 | 1.002   | 0.350 | 0.998  | 0.896 |
| 1389416_at   | BI296051  | RGD1560398 (predicted)                                                                  | RGD1560398_predicted | 0.720   | 0.093 | 1.986  | 0.025 | 0.726   | 0.075 | 1.491  | 0.088 |
| 1380478_at   | AW533633  | RGD1560472 (predicted)                                                                  | RGD1560472_predicted | 0.496   | 0.051 | 0.889  | 0.249 | 0.497   | 0.041 | 0.791  | 0.312 |
| 1379539_at   | AI137339  | RGD1560524 (predicted)                                                                  | RGD1560524_predicted | 0.991   | 0.985 | 0.996  | 0.952 | 1.001   | 0.995 | 1.001  | 0.640 |
| 1383674_at   | BF419619  | RGD1560566 (predicted)                                                                  | RGD1560566_predicted | 0.518   | 0.273 | 0.617  | 0.011 | 0.779   | 0.097 | 0.529  | 0.009 |
| 1383874_at   | BG670036  | RGD1560812 (predicted)                                                                  | RGD1560812_predicted | 1.803   | 0.098 | 1.086  | 0.375 | 1.763   | 0.568 | 2.403  | 0.006 |
| 1374003_at   | BM389589  | RGD1560835 (predicted)                                                                  | RGD1560835_predicted | 1.497   | 0.058 | 1.163  | 0.526 | 1.385   | 0.127 | 0.906  | 0.356 |
| 1392526_at   | AA901274  | RGD1560866 (predicted)                                                                  | RGD1560866_predicted | 0.836   | 0.620 | 0.281  | 0.003 | 0.561   | 0.280 | 0.262  | 0.001 |
| 1376784_at   | BI274481  | RGD1560869 (predicted)                                                                  | RGD1560869_predicted | 1.275   | 0.940 | 1.024  | 0.858 | 2.705   | 0.056 | 1.490  | 0.452 |
| 1372460_at   | AI172405  | RGD1561000 (predicted)                                                                  | RGD1561000_predicted | 0.759   | 0.052 | 0.792  | 0.050 | 0.600   | 0.008 | 0.782  | 0.043 |
| 1383227_at   | BI288882  | RGD1561072 (predicted)                                                                  | RGD1561072_predicted | 0.807   | 0.425 | 0.895  | 0.604 | 0.722   | 0.203 | 1.035  | 0.162 |
| 1385061_at   | AI145445  | RGD1561097 (predicted)                                                                  | RGD1561097_predicted | 1.002   | 0.861 | 0.485  | 0.016 | 0.996   | 0.905 | 0.594  | 0.012 |
| 1371504_at   | BF281215  | RGD1561181 (predicted)                                                                  | RGD1561181_predicted | 0.968   | 0.798 | 1.265  | 0.097 | 0.835   | 0.021 | 1.162  | 0.098 |
| 1383136_a_at | AI764288  | RGD1561438 (predicted)                                                                  | RGD1561438_predicted | 1.077   | 0.727 | 0.951  | 0.975 | 1.506   | 0.403 | 1.374  | 0.044 |
| 1386120_at   | BF393607  | RGD1561595 (predicted)                                                                  | RGD1561595_predicted | 0.625   | 0.120 | 0.647  | 0.020 | 0.546   | 0.273 | 0.518  | 0.028 |
| 1389580_at   | BM384827  | RGD1561695 (predicted)                                                                  | RGD1561695_predicted | 0.731   | 0.413 | 0.428  | 0.006 | 0.964   | 0.637 | 0.907  | 0.407 |
| 1385463_at   | AI043627  | RGD1561717 (predicted)                                                                  | RGD1561717_predicted | 1.123   | 0.437 | 5.930  | 0.010 | 0.987   | 0.789 | 1.914  | 0.023 |
| 1389744_at   | AW527194  | RGD1561752 (predicted)                                                                  | RGD1561752_predicted | 0.499   | 0.014 | 0.462  | 0.077 | 0.484   | 0.018 | 0.668  | 0.042 |
| 1371480_at   | AI407985  | RGD1561797 (predicted)                                                                  | RGD1561797_predicted | 0.919   | 0.281 | 1.694  | 0.069 | 0.708   | 0.107 | 1.849  | 0.057 |
| 1380323_at   | BE105023  | RGD1561936 (predicted)                                                                  | RGD1561936_predicted | 2.939   | 0.056 | 3.319  | 0.000 | 1.938   | 0.083 | 2.222  | 0.001 |
| 1394205_at   | AA955942  | RGD1561936 (predicted)                                                                  | RGD1561936_predicted | 1.250   | 0.226 | 0.878  | 0.055 | 0.956   | 0.441 | 1.028  | 0.337 |
| 1373616_at   | BM386276  | RGD1561936 (predicted)                                                                  | RGD1561936_predicted | 0.880   | 0.855 | 0.974  | 0.731 | 0.743   | 0.026 | 0.858  | 0.006 |

|              |          |                        |                      |         |       |         |       |          |       |         |       |
|--------------|----------|------------------------|----------------------|---------|-------|---------|-------|----------|-------|---------|-------|
| 1377461_at   | AI409983 | RGD1561952 (predicted) | RGD1561952_predicted | 1.409   | 0.182 | 11.073  | 0.002 | 0.999    | 0.063 | 7.515   | 0.002 |
| 1395214_at   | BM391078 | RGD1562012 (predicted) | RGD1562012_predicted | 0.470   | 0.277 | 1.279   | 0.955 | 0.385    | 0.043 | 0.771   | 0.914 |
| 1371488_at   | AW915978 | RGD1562079 (predicted) | RGD1562079_predicted | 1.442   | 0.042 | 1.986   | 0.002 | 1.428    | 0.083 | 2.041   | 0.004 |
| 1390527_at   | BE099470 | RGD1562114 (predicted) | RGD1562114_predicted | 0.751   | 0.507 | 1.392   | 0.018 | 0.597    | 0.081 | 1.577   | 0.024 |
| 1383534_at   | AA997058 | RGD1562237 (predicted) | RGD1562237_predicted | 0.442   | 0.241 | 0.454   | 0.004 | 0.441    | 0.347 | 0.510   | 0.003 |
| 1383099_at   | BG670905 | RGD1562241 (predicted) | RGD1562241_predicted | 1.246   | 0.343 | 1.434   | 0.188 | 0.868    | 0.526 | 1.072   | 0.541 |
| 1384809_at   | AW526563 | RGD1562481 (predicted) | RGD1562481_predicted | 0.416   | 0.295 | 1.612   | 0.411 | 0.287    | 0.005 | 0.579   | 0.101 |
| 1394662_at   | BI295646 | RGD1562481 (predicted) | RGD1562481_predicted | 1.201   | 0.362 | 0.940   | 0.634 | 0.863    | 0.972 | 0.977   | 0.771 |
| 1381307_at   | AI412008 | RGD1562538 (predicted) | RGD1562538_predicted | 0.631   | 0.989 | 1.405   | 0.394 | 0.990    | 0.992 | 1.447   | 0.739 |
| 1392462_at   | AA817891 | RGD1562568 (predicted) | RGD1562568_predicted | 1.425   | 0.576 | 0.935   | 0.080 | 1.854    | 0.560 | 1.061   | 0.279 |
| 1374536_at   | BG671506 | RGD1562568 (predicted) | RGD1562568_predicted | 1.091   | 0.811 | 0.671   | 0.108 | 1.014    | 0.943 | 0.782   | 0.043 |
| 1397790_at   | BF394731 | RGD1562574 (predicted) | RGD1562574_predicted | 1.001   | 0.959 | 0.671   | 0.275 | 0.927    | 0.804 | 0.862   | 0.283 |
| 1378661_x_at | BM389983 | RGD1562704 (predicted) | RGD1562704_predicted | 1.188   | 0.529 | 1.028   | 0.999 | 1.103    | 0.355 | 1.143   | 0.228 |
| 1373934_at   | AI178214 | RGD1563075 (predicted) | RGD1563075_predicted | 1.256   | 0.066 | 0.920   | 0.550 | 0.998    | 0.978 | 0.869   | 0.421 |
| 1372262_at   | BI285626 | RGD1563087 (predicted) | RGD1563087_predicted | 0.707   | 0.142 | 0.684   | 0.014 | 0.625    | 0.006 | 0.755   | 0.023 |
| 1375662_at   | BI291391 | RGD1563087 (predicted) | RGD1563087_predicted | 0.696   | 0.721 | 1.181   | 0.376 | 0.809    | 0.324 | 0.826   | 0.071 |
| 1388452_at   | AI716904 | RGD1563308 (predicted) | RGD1563308_predicted | 0.573   | 0.133 | 0.276   | 0.007 | 0.601    | 0.003 | 0.212   | 0.021 |
| 1396815_at   | AW251438 | RGD1563361 (predicted) | RGD1563361_predicted | 1.002   | 0.845 | 1.476   | 0.104 | 0.953    | 0.745 | 1.206   | 0.049 |
| 1379418_at   | AW916753 | RGD1563361 (predicted) | RGD1563361_predicted | 0.994   | 0.909 | 0.901   | 0.534 | 0.890    | 0.998 | 0.919   | 0.169 |
| 1383449_at   | AA801218 | RGD1563374 (predicted) | RGD1563374_predicted | 1.023   | 0.835 | 0.869   | 0.983 | 1.102    | 0.509 | 1.272   | 0.500 |
| 1389716_at   | BI295883 | RGD1563479 (predicted) | RGD1563479_predicted | 1.617   | 0.747 | 0.673   | 0.026 | 1.259    | 0.049 | 0.697   | 0.078 |
| 1373586_at   | AI411113 | RGD1563515 (predicted) | RGD1563515_predicted | 0.748   | 0.876 | 0.485   | 0.004 | 0.658    | 0.269 | 0.515   | 0.000 |
| 1383221_at   | BG378463 | RGD1563547 (predicted) | RGD1563547_predicted | 0.934   | 0.816 | 1.622   | 0.001 | 0.855    | 0.610 | 1.036   | 0.365 |
| 1375136_at   | AA946053 | RGD1563661 (predicted) | RGD1563661_predicted | 1.016   | 0.621 | 1.527   | 0.076 | 0.635    | 0.234 | 1.278   | 0.045 |
| 1396810_at   | AI578423 | RGD1563714 (predicted) | RGD1563714_predicted | 0.751   | 0.226 | 0.747   | 0.578 | 0.478    | 0.775 | 0.512   | 0.534 |
| 1395249_at   | BF400750 | RGD1563912 (predicted) | RGD1563912_predicted | 0.313   | 0.002 | 0.228   | 0.006 | 0.444    | 0.131 | 0.173   | 0.032 |
| 1375305_at   | BI282028 | RGD1563912 (predicted) | RGD1563912_predicted | 0.425   | 0.002 | 0.258   | 0.000 | 0.510    | 0.031 | 0.226   | 0.015 |
| 1393263_at   | AW522530 | RGD1563912 (predicted) | RGD1563912_predicted | 0.466   | 0.010 | 0.174   | 0.000 | 0.906    | 0.213 | 0.189   | 0.028 |
| 1392823_at   | AI146105 | RGD1563912 (predicted) | RGD1563912_predicted | 0.579   | 0.038 | 0.143   | 0.004 | 0.304    | 0.112 | 0.255   | 0.010 |
| 1375191_at   | AI230379 | RGD1564011 (predicted) | RGD1564011_predicted | 1.830   | 0.003 | 2.601   | 0.002 | 1.653    | 0.006 | 1.893   | 0.000 |
| 1376801_at   | AW915035 | RGD1564450 (predicted) | RGD1564450_predicted | 1.003   | 0.405 | 1.429   | 0.027 | 1.458    | 0.385 | 1.347   | 0.026 |
| 1398332_at   | BM386294 | RGD1564468 (predicted) | RGD1564468_predicted | 0.548   | 0.205 | 0.400   | 0.011 | 0.545    | 0.190 | 0.268   | 0.012 |
| 1391037_at   | BF412161 | RGD1564491 (predicted) | RGD1564491_predicted | 0.398   | 0.002 | 0.310   | 0.001 | 0.360    | 0.074 | 0.374   | 0.051 |
| 1383409_at   | BM383714 | RGD1564737 (predicted) | RGD1564737_predicted | 2.143   | 0.284 | 1.452   | 0.035 | 2.168    | 0.040 | 1.343   | 0.085 |
| 1397838_at   | BF522792 | RGD1564792 (predicted) | RGD1564792_predicted | 0.943   | 0.831 | 0.997   | 0.945 | 1.004    | 0.997 | 1.009   | 0.063 |
| 1396118_at   | AI410171 | RGD1564942 (predicted) | RGD1564942_predicted | 1.001   | 0.561 | 1.000   | 0.994 | 0.981    | 0.814 | 1.000   | 0.737 |
| 1372928_at   | AI169749 | RGD1564965 (predicted) | RGD1564965_predicted | 0.510   | 0.037 | 0.476   | 0.001 | 0.735    | 0.130 | 0.793   | 0.413 |
| 1371513_at   | BG378743 | RGD1564971 (predicted) | RGD1564971_predicted | 0.629   | 0.056 | 0.766   | 0.196 | 0.735    | 0.058 | 0.912   | 0.263 |
| 1375464_at   | BI290815 | RGD1564982 (predicted) | RGD1564982_predicted | 0.776   | 0.335 | 1.179   | 0.033 | 0.919    | 0.504 | 0.857   | 0.375 |
| 1372548_at   | AI412018 | RGD1565050 (predicted) | RGD1565050_predicted | 0.461   | 0.047 | 0.840   | 0.282 | 0.360    | 0.090 | 0.589   | 0.086 |
| 1398366_at   | BF282644 | RGD1565074 (predicted) | RGD1565074_predicted | 0.511   | 0.037 | 1.467   | 0.165 | 0.582    | 0.044 | 1.080   | 0.517 |
| 1392558_at   | AI101600 | RGD1565142 (predicted) | RGD1565142_predicted | 0.993   | 0.843 | 0.598   | 0.050 | 0.979    | 0.806 | 0.597   | 0.055 |
| 1386337_at   | AI548910 | RGD1565210 (predicted) | RGD1565210_predicted | 0.468   | 0.416 | 0.986   | 0.462 | 0.671    | 0.127 | 0.897   | 0.198 |
| 1393880_at   | AI030169 | RGD1565240 (predicted) | RGD1565240_predicted | 1.316   | 0.807 | 0.601   | 0.496 | 0.821    | 0.678 | 0.642   | 0.104 |
| 1395603_at   | BI300879 | RGD1565487 (predicted) | RGD1565487_predicted | 0.964   | 0.951 | 1.309   | 0.959 | 1.894    | 0.042 | 0.987   | 0.491 |
| 1374294_at   | AW534851 | RGD1565594 (predicted) | RGD1565594_predicted | 1.832   | 0.031 | 0.835   | 0.031 | 1.555    | 0.259 | 0.950   | 0.396 |
| 1396677_at   | BF406365 | RGD1565612 (predicted) | RGD1565612_predicted | 0.882   | 0.605 | 0.660   | 0.939 | 1.035    | 0.783 | 1.015   | 0.917 |
| 1392929_at   | BF416678 | RGD1565616 (predicted) | RGD1565616_predicted | 0.756   | 1.000 | 0.706   | 0.200 | 0.881    | 0.681 | 0.589   | 0.040 |
| 1377728_at   | BI280802 | RGD1565641 (predicted) | RGD1565641_predicted | 0.783   | 0.354 | 1.700   | 0.011 | 0.774    | 0.025 | 1.711   | 0.005 |
| 1393800_at   | AW526472 | RGD1565777 (predicted) | RGD1565777_predicted | 0.877   | 0.245 | 0.512   | 0.002 | 0.637    | 0.072 | 0.788   | 0.395 |
| 1367508_at   | BI281225 | RGD1565784 (predicted) | RGD1565784_predicted | 0.517   | 0.044 | 1.419   | 0.068 | 0.383    | 0.003 | 1.240   | 0.679 |
| 1392484_at   | AA892339 | RGD1565814 (predicted) | RGD1565814_predicted | 0.808   | 0.137 | 2.520   | 0.005 | 0.719    | 0.026 | 2.035   | 0.003 |
| 1381775_at   | BF391321 | RGD1566102 (predicted) | RGD1566102_predicted | 0.867   | 0.075 | 0.362   | 0.011 | 1.244    | 0.621 | 0.785   | 0.114 |
| 1388900_at   | BG381414 | RGD1566118 (predicted) | RGD1566118_predicted | 1.759   | 0.015 | 7.071   | 0.004 | 0.945    | 0.686 | 3.950   | 0.004 |
| 1372585_at   | BM388445 | RGD1566254 (predicted) | RGD1566254_predicted | 975.780 | 0.006 | 547.221 | 0.014 | 1259.582 | 0.006 | 612.973 | 0.013 |
| 1388316_at   | BG668062 | RGD1566320 (predicted) | RGD1566320_predicted | 0.773   | 0.060 | 1.235   | 0.122 | 0.685    | 0.098 | 1.366   | 0.037 |
| 1380946_at   | AW251808 | RGD1566367 (predicted) | RGD1566367_predicted | 0.588   | 0.279 | 0.727   | 0.115 | 0.319    | 0.060 | 0.476   | 0.100 |
| 1392973_at   | AI073173 | RGD1566412 (predicted) | RGD1566412_predicted | 1.088   | 0.144 | 0.355   | 0.002 | 1.338    | 0.021 | 0.500   | 0.061 |
| 1371704_at   | BI274402 | Rho family GTPase 1    | Rnd1                 | 0.916   | 0.733 | 1.213   | 0.185 | 0.844    | 0.195 | 1.101   | 0.233 |
| 1386062_at   | AI060227 | Rho family GTPase 3    | Rnd3                 | 7.596   | 0.000 | 4.762   | 0.009 | 7.460    | 0.001 | 2.725   | 0.000 |
| 1394077_at   | BF548080 | Rho family GTPase 3    | Rnd3                 | 1.989   | 0.023 | 2.261   | 0.052 | 2.798    | 0.006 | 1.597   | 0.093 |

|              |           |                                                                                    |                        |        |       |       |       |        |       |        |       |
|--------------|-----------|------------------------------------------------------------------------------------|------------------------|--------|-------|-------|-------|--------|-------|--------|-------|
| 1377663_at   | AI598323  | Rho family GTPase 3                                                                | Rnd3                   | 1.761  | 0.096 | 1.253 | 0.292 | 1.953  | 0.008 | 1.440  | 0.008 |
| 1371366_at   | AI408677  | Rho GDP dissociation inhibitor (GDI) alpha                                         | Arhgdia                | 0.918  | 0.777 | 3.634 | 0.009 | 0.827  | 0.079 | 2.288  | 0.004 |
| 1398108_at   | AW532298  | Rho GDP dissociation inhibitor (GDI) alpha                                         | Arhgdia                | 0.436  | 0.930 | 4.901 | 0.119 | 0.591  | 0.112 | 2.846  | 0.450 |
| 1397356_at   | AI234957  | Rho GTPase activating protein 1 (predicted)                                        | Arhgap1_predicted      | 2.056  | 0.180 | 2.465 | 0.166 | 4.598  | 0.037 | 1.088  | 0.853 |
| 1391101_at   | AI407134  | Rho GTPase activating protein 12 (predicted)                                       | Arhgap12_predicted     | 2.083  | 0.416 | 2.283 | 0.083 | 1.399  | 0.105 | 1.744  | 0.036 |
| 1387035_a_at | NM_022244 | Rho GTPase activating protein 17                                                   | Arhgap17               | 2.860  | 0.016 | 2.068 | 0.007 | 4.308  | 0.000 | 2.518  | 0.006 |
| 1396575_at   | AI576265  | Rho GTPase activating protein 20 /// hypothetical gene supported by NM_213629      | Arhgap20 /// LOC497830 | 0.561  | 0.010 | 0.757 | 0.038 | 0.616  | 0.027 | 0.707  | 0.398 |
| 1374086_at   | BF282296  | Rho GTPase activating protein 21 (predicted)                                       | Arhgap21_predicted     | 1.869  | 0.106 | 2.083 | 0.001 | 1.270  | 0.126 | 2.168  | 0.002 |
| 1392590_at   | BG377201  | Rho GTPase activating protein 24                                                   | Arhgap24               | 0.299  | 0.077 | 0.189 | 0.008 | 0.194  | 0.019 | 0.308  | 0.038 |
| 1393677_at   | BI275079  | Rho GTPase activating protein 26 (predicted)                                       | Arhgap26_predicted     | 1.310  | 0.097 | 1.856 | 0.091 | 0.982  | 0.887 | 1.256  | 0.639 |
| 1396139_at   | BE120196  | Rho GTPase activating protein 26 (predicted)                                       | Arhgap26_predicted     | 0.997  | 0.993 | 1.000 | 0.972 | 1.749  | 0.008 | 0.831  | 0.064 |
| 1391581_at   | BE104302  | Rho GTPase activating protein 5                                                    | Arhgap5                | 1.268  | 0.024 | 1.528 | 0.051 | 1.225  | 0.055 | 1.888  | 0.057 |
| 1392864_at   | BM384008  | Rho GTPase activating protein 5                                                    | Arhgap5                | 1.135  | 0.124 | 1.298 | 0.025 | 1.005  | 0.682 | 1.099  | 0.494 |
| 1395776_at   | BF396580  | Rho GTPase activating protein 5                                                    | Arhgap5                | 1.001  | 0.709 | 0.815 | 0.485 | 1.233  | 0.321 | 1.014  | 0.483 |
| 1376501_at   | AA945062  | Rho GTPase activating protein 8                                                    | Arhgap8                | 6.837  | 0.000 | 6.065 | 0.002 | 12.247 | 0.002 | 10.622 | 0.001 |
| 1378800_at   | BI291526  | Rho GTPase activating protein 8                                                    | Arhgap8                | 4.369  | 0.073 | 3.725 | 0.001 | 3.613  | 0.018 | 5.209  | 0.000 |
| 1370002_at   | NM_021694 | Rho guanine nucleotide exchange factor (GEF) 1                                     | Arhgef1                | 1.011  | 0.936 | 1.313 | 0.066 | 0.762  | 0.798 | 0.937  | 0.990 |
| 1374486_at   | AI412491  | Rho guanine nucleotide exchange factor (GEF) 11                                    | Arhgef11               | 1.319  | 0.036 | 0.862 | 0.125 | 1.035  | 0.444 | 0.786  | 0.070 |
| 1398299_at   | NM_023982 | Rho guanine nucleotide exchange factor (GEF) 11                                    | Arhgef11               | 1.002  | 0.955 | 0.969 | 0.820 | 0.963  | 0.981 | 0.972  | 0.210 |
| 1395229_at   | BG375118  | Rho guanine nucleotide exchange factor (GEF) 12                                    | Arhgef12               | 2.518  | 0.047 | 3.373 | 0.001 | 2.022  | 0.104 | 3.381  | 0.001 |
| 1378062_at   | BF398677  | Rho guanine nucleotide exchange factor (GEF) 12                                    | Arhgef12               | 1.608  | 0.540 | 2.001 | 0.005 | 1.585  | 0.295 | 1.241  | 0.060 |
| 1394348_at   | BF545496  | Rho guanine nucleotide exchange factor (GEF) 12                                    | Arhgef12               | 1.000  | 0.985 | 1.660 | 0.132 | 1.001  | 0.865 | 1.025  | 0.884 |
| 1394494_at   | AA963519  | Rho guanine nucleotide exchange factor (GEF) 19 (predicted)                        | Arhgef19_predicted     | 1.001  | 0.963 | 0.994 | 0.991 | 1.004  | 0.997 | 0.995  | 0.980 |
| 1381297_at   | BI292668  | Rho guanine nucleotide exchange factor (GEF) 5                                     | Arhgef5                | 12.951 | 0.000 | 7.007 | 0.001 | 10.144 | 0.001 | 5.975  | 0.002 |
| 1382389_at   | AI179755  | Rho guanine nucleotide exchange factor (GEF) 5                                     | Arhgef5                | 3.519  | 0.002 | 3.200 | 0.009 | 4.422  | 0.001 | 3.245  | 0.002 |
| 1394015_at   | AA965157  | Rho guanine nucleotide exchange factor 7                                           | Arhgef7                | 0.997  | 0.865 | 0.988 | 0.845 | 0.986  | 0.933 | 1.001  | 0.938 |
| 1390786_at   | BE099756  | rho/rac guanine nucleotide exchange factor (GEF) 2                                 | Arhgef2                | 1.508  | 0.170 | 2.915 | 0.000 | 0.933  | 0.864 | 2.259  | 0.012 |
| 1373878_at   | AI104213  | Rho-associated coiled-coil forming kinase 1                                        | Rock1                  | 1.299  | 0.182 | 1.044 | 0.077 | 1.065  | 0.665 | 1.077  | 0.118 |
| 1377061_at   | BE097238  | RhoGAP involved in beta-catenin-N-cadherin and NMDA receptor signaling (predicted) | RICS_predicted         | 0.672  | 0.239 | 1.056 | 0.829 | 0.571  | 0.168 | 0.607  | 0.393 |
| 1374376_at   | BM386483  | Rho-guanine nucleotide exchange factor (predicted)                                 | Rgnef_predicted        | 0.475  | 0.051 | 3.925 | 0.001 | 0.356  | 0.360 | 3.123  | 0.012 |
| 1382258_at   | AW521384  | Rho-guanine nucleotide exchange factor (predicted)                                 | Rgnef_predicted        | 0.847  | 0.368 | 1.019 | 0.177 | 1.177  | 0.248 | 1.101  | 0.675 |
| 1379026_at   | AI072008  | Rhomboid, veinlet-like 4 (Drosophila) (predicted)                                  | Rhbdl4_predicted       | 1.009  | 0.744 | 0.354 | 0.109 | 0.616  | 0.098 | 0.148  | 0.092 |
| 1372051_at   | BI294778  | Rhomboid, veinlet-like 7 (Drosophila) (predicted)                                  | Rhbdl7_predicted       | 0.641  | 0.146 | 1.194 | 0.110 | 0.691  | 0.101 | 0.966  | 0.985 |
| 1382055_at   | BE096213  | rhotekin                                                                           | Rtkn                   | 0.822  | 0.189 | 0.847 | 0.126 | 0.998  | 0.362 | 1.025  | 0.842 |
| 1372671_at   | BI284293  | riboflavin kinase                                                                  | Rfk                    | 0.782  | 0.501 | 0.923 | 0.469 | 0.683  | 0.055 | 1.007  | 0.349 |
| 1375093_at   | AI236089  | ribokinase (predicted)                                                             | Rbks_predicted         | 0.618  | 0.295 | 0.908 | 0.478 | 0.532  | 0.013 | 1.092  | 0.925 |
| 1371451_at   | AI010940  | ribonuclease H2, large subunit                                                     | Rnaseh2a               | 1.255  | 0.217 | 1.189 | 0.223 | 1.662  | 0.023 | 1.500  | 0.029 |
| 1376273_at   | BI285089  | ribonuclease III, nuclear                                                          | Rnaseh3                | 0.738  | 0.321 | 1.087 | 0.253 | 1.265  | 0.761 | 1.182  | 0.810 |
| 1398437_at   | BF412792  | Ribonuclease III, nuclear                                                          | Rnaseh3                | 1.091  | 0.681 | 0.519 | 0.050 | 1.126  | 0.710 | 0.991  | 0.483 |
| 1380425_at   | AI012859  | Ribonuclease L (2',5'-oligoadenylate synthetase-dependent)                         | RnaseL                 | 14.850 | 0.057 | 0.568 | 0.019 | 9.401  | 0.000 | 1.095  | 0.739 |
| 1377116_at   | BI301478  | Ribonuclease L (2',5'-oligoadenylate synthetase-dependent)                         | RnaseL                 | 1.394  | 0.065 | 1.414 | 0.073 | 2.811  | 0.023 | 1.681  | 0.027 |
| 1377815_at   | BE102535  | ribonuclease P 14 subunit homolog (human) (predicted)                              | Rpp14_predicted        | 0.748  | 0.003 | 1.087 | 0.083 | 0.757  | 0.001 | 0.854  | 0.975 |
| 1372845_at   | BG380782  | ribonuclease P 21 subunit (human)                                                  | Rpp21                  | 1.785  | 0.265 | 1.622 | 0.331 | 2.225  | 0.007 | 1.634  | 0.300 |
| 1378181_at   | BI279714  | ribonuclease P 40 subunit (human)                                                  | Rpp40                  | 1.283  | 0.294 | 2.451 | 0.080 | 1.672  | 0.068 | 1.987  | 0.005 |
| 1375211_at   | BM391506  | ribonuclease T2 (predicted)                                                        | Rnaset2_predicted      | 0.723  | 0.805 | 1.213 | 0.041 | 1.496  | 0.049 | 1.602  | 0.001 |
| 1370880_at   | X62528    | ribonuclease/angiogenin inhibitor 1                                                | Rnh1                   | 2.204  | 0.021 | 3.787 | 0.000 | 1.799  | 0.080 | 2.783  | 0.010 |
| 1371596_at   | AI008971  | ribonucleic acid binding protein S1                                                | Rnps1                  | 1.008  | 0.678 | 1.836 | 0.001 | 0.897  | 0.359 | 1.536  | 0.006 |
| 1371862_at   | AI412015  | ribonucleotide reductase M1 (mapped)                                               | Rrml_mapped            | 0.753  | 0.670 | 0.834 | 0.562 | 0.913  | 0.507 | 0.856  | 0.477 |
| 1398766_at   | NM_013067 | ribophorin I                                                                       | Rpn1                   | 0.729  | 0.076 | 0.804 | 0.007 | 0.840  | 0.407 | 0.769  | 0.014 |
| 1381319_at   | BF407155  | Ribophorin II                                                                      | Rpn2                   | 0.954  | 0.525 | 1.018 | 0.962 | 0.734  | 0.103 | 1.000  | 0.996 |
| 1398776_at   | NM_031698 | ribophorin II                                                                      | Rpn2                   | 0.891  | 0.626 | 0.588 | 0.002 | 0.779  | 0.139 | 0.625  | 0.002 |
| 1389468_at   | BF393902  | ribose 5-phosphate isomerase A (predicted)                                         | Rpia_predicted         | 1.021  | 0.778 | 0.799 | 0.171 | 1.092  | 0.146 | 0.874  | 0.393 |
| 1386394_at   | AA956971  | Ribose-phosphate pyrophosphokinase I -like                                         | LOC314140              | 0.616  | 0.068 | 1.569 | 0.079 | 0.644  | 0.452 | 1.511  | 0.032 |
| 1394196_at   | AA956971  | Ribose-phosphate pyrophosphokinase I -like                                         | LOC314140              | 0.557  | 0.130 | 1.306 | 0.160 | 0.536  | 0.109 | 1.369  | 0.122 |
| 1390769_at   | AI535312  | Ribose-phosphate pyrophosphokinase I -like                                         | LOC314140              | 0.866  | 0.704 | 1.362 | 0.055 | 0.840  | 0.543 | 1.660  | 0.000 |
| 1367625_at   | NM_031100 | ribosomal protein L10                                                              | Rpl10                  | 0.889  | 0.966 | 1.017 | 0.743 | 0.740  | 0.264 | 0.975  | 0.645 |
| 1367580_at   | NM_031065 | ribosomal protein L10A                                                             | Rpl10a                 | 0.849  | 0.507 | 1.311 | 0.093 | 0.592  | 0.023 | 1.069  | 0.523 |
| 1371330_at   | BI284252  | ribosomal protein L11                                                              | Rpl11                  | 0.953  | 0.816 | 1.270 | 0.118 | 0.776  | 0.054 | 1.240  | 0.057 |
| 1386858_at   | NM_031101 | ribosomal protein L13                                                              | Rpl13                  | 0.823  | 0.268 | 1.064 | 0.215 | 0.689  | 0.002 | 1.008  | 0.560 |
| 1367588_a_at | NM_022179 | ribosomal protein L13A                                                             | Rpl13a                 | 0.957  | 0.512 | 1.334 | 0.023 | 0.893  | 0.248 | 1.128  | 0.197 |
| 1375375_at   | AI059414  | Ribosomal protein L14                                                              | Rpl14                  | 1.126  | 0.669 | 1.205 | 0.044 | 0.906  | 0.005 | 0.990  | 0.875 |

|              |           |                                                                                                                                                                          |                                                                                          |       |       |       |       |       |       |       |       |
|--------------|-----------|--------------------------------------------------------------------------------------------------------------------------------------------------------------------------|------------------------------------------------------------------------------------------|-------|-------|-------|-------|-------|-------|-------|-------|
| 1387887_at   | AA874811  | ribosomal protein L14                                                                                                                                                    | Rpl14                                                                                    | 0.763 | 0.949 | 1.049 | 0.778 | 0.663 | 0.137 | 1.155 | 0.967 |
| 1398315_at   | AA800007  | ribosomal protein L15                                                                                                                                                    | Rpl15                                                                                    | 0.960 | 0.939 | 1.201 | 0.146 | 0.803 | 0.211 | 1.102 | 0.023 |
| 1398871_at   | BG671311  | ribosomal protein L17                                                                                                                                                    | Rpl17                                                                                    | 0.841 | 0.216 | 1.152 | 0.286 | 0.716 | 0.043 | 1.179 | 0.144 |
| 1367623_at   | NM_031102 | ribosomal protein L18                                                                                                                                                    | Rpl18                                                                                    | 0.704 | 0.255 | 1.102 | 0.260 | 0.664 | 0.010 | 0.999 | 0.783 |
| 1367610_at   | NM_031103 | ribosomal protein L19                                                                                                                                                    | Rpl19                                                                                    | 0.957 | 0.797 | 1.107 | 0.328 | 0.840 | 0.243 | 1.042 | 0.438 |
| 1398764_at   | NM_053330 | ribosomal protein L21                                                                                                                                                    | Rpl21                                                                                    | 1.008 | 0.402 | 1.249 | 0.000 | 0.962 | 0.456 | 1.109 | 0.077 |
| 1370253_at   | AI228150  | ribosomal protein L22                                                                                                                                                    | Rpl22                                                                                    | 0.775 | 0.307 | 1.188 | 0.225 | 0.709 | 0.003 | 1.167 | 0.297 |
| 1388989_at   | BI302675  | ribosomal protein L22 like 1 (predicted)                                                                                                                                 | Rpl22l1_predicted                                                                        | 0.705 | 0.074 | 1.069 | 0.510 | 0.701 | 0.046 | 1.069 | 0.159 |
| 1398885_at   | AA925327  | ribosomal protein L23                                                                                                                                                    | Rpl23                                                                                    | 0.852 | 0.623 | 1.343 | 0.035 | 0.739 | 0.141 | 1.198 | 0.039 |
| 1396812_at   | BF547253  | Ribosomal protein L24                                                                                                                                                    | Rpl24                                                                                    | 1.360 | 0.204 | 1.099 | 0.093 | 1.002 | 0.949 | 0.966 | 0.802 |
| 1398854_at   | BI297634  | ribosomal protein L24                                                                                                                                                    | Rpl24                                                                                    | 0.976 | 0.406 | 1.158 | 0.241 | 0.793 | 0.891 | 1.191 | 0.015 |
| 1388303_at   | AI598536  | ribosomal protein L26                                                                                                                                                    | Rpl26                                                                                    | 0.886 | 0.650 | 1.191 | 0.073 | 0.724 | 0.052 | 1.057 | 0.049 |
| 1367561_at   | NM_022514 | ribosomal protein L27                                                                                                                                                    | Rpl27                                                                                    | 0.825 | 0.432 | 1.110 | 0.069 | 0.747 | 0.038 | 1.167 | 0.125 |
| 1371344_at   | AI177054  | ribosomal protein L27a (predicted)                                                                                                                                       | Rpl27a_predicted                                                                         | 0.897 | 0.486 | 1.129 | 0.532 | 0.793 | 0.032 | 0.997 | 0.969 |
| 1398830_at   | NM_022697 | ribosomal protein L28                                                                                                                                                    | Rpl28                                                                                    | 0.859 | 0.523 | 1.294 | 0.036 | 0.685 | 0.004 | 1.078 | 0.107 |
| 1367582_at   | NM_017150 | ribosomal protein L29                                                                                                                                                    | Rpl29                                                                                    | 0.887 | 0.512 | 1.211 | 0.208 | 0.737 | 0.144 | 1.112 | 0.293 |
| 1396049_x_at | BG057530  | ribosomal protein L3                                                                                                                                                     | Rpl3                                                                                     | 0.940 | 0.383 | 0.984 | 0.770 | 0.972 | 0.107 | 0.982 | 0.923 |
| 1371300_at   | AA892367  | ribosomal protein L3                                                                                                                                                     | Rpl3                                                                                     | 0.948 | 0.958 | 0.954 | 0.902 | 0.843 | 0.059 | 0.792 | 0.138 |
| 1398774_at   | NM_022699 | ribosomal protein L30                                                                                                                                                    | Rpl30                                                                                    | 0.961 | 0.936 | 1.265 | 0.030 | 0.773 | 0.069 | 1.214 | 0.024 |
| 1367634_at   | NM_022506 | ribosomal protein L31                                                                                                                                                    | Rpl31                                                                                    | 0.878 | 0.800 | 1.184 | 0.058 | 0.761 | 0.090 | 1.069 | 0.138 |
| 1384548_at   | BM388159  | ribosomal protein L32                                                                                                                                                    | Rpl32                                                                                    | 0.842 | 0.226 | 1.097 | 0.066 | 0.754 | 0.003 | 1.001 | 0.044 |
| 1398216_at   | BF399439  | Ribosomal protein L32                                                                                                                                                    | Rpl32                                                                                    | 1.055 | 0.890 | 0.931 | 0.138 | 1.181 | 0.508 | 0.627 | 0.056 |
| 1371761_at   | AI013910  | ribosomal protein L34 (predicted)                                                                                                                                        | Rpl34_predicted                                                                          | 0.951 | 0.887 | 1.619 | 0.012 | 0.815 | 0.159 | 1.484 | 0.009 |
| 1388372_at   | AW914118  | ribosomal protein L35                                                                                                                                                    | Rpl35                                                                                    | 0.865 | 0.823 | 1.563 | 0.025 | 0.763 | 0.050 | 1.242 | 0.075 |
| 1398760_at   | NM_021264 | ribosomal protein L35a                                                                                                                                                   | Rpl35a                                                                                   | 1.014 | 0.899 | 1.267 | 0.052 | 0.955 | 0.244 | 1.141 | 0.043 |
| 1371573_at   | AW142090  | ribosomal protein L36a (predicted)                                                                                                                                       | Rpl36a_predicted                                                                         | 0.958 | 0.752 | 1.187 | 0.004 | 0.870 | 0.189 | 1.010 | 0.383 |
| 1398789_at   | NM_031106 | ribosomal protein L37                                                                                                                                                    | Rpl37                                                                                    | 0.957 | 0.936 | 1.377 | 0.006 | 0.846 | 0.117 | 1.363 | 0.002 |
| 1367934_at   | NM_012875 | ribosomal protein L39                                                                                                                                                    | Rpl39                                                                                    | 1.219 | 0.746 | 1.454 | 0.004 | 0.937 | 0.740 | 1.481 | 0.007 |
| 1371916_at   | AI409380  | Ribosomal protein L3-like (predicted)                                                                                                                                    | Rpl3l_predicted                                                                          | 0.637 | 0.047 | 0.827 | 0.555 | 0.738 | 0.004 | 0.995 | 0.680 |
| 1398749_at   | NM_022510 | ribosomal protein L4                                                                                                                                                     | Rpl4                                                                                     | 0.899 | 0.469 | 1.171 | 0.067 | 0.728 | 0.012 | 1.009 | 0.923 |
| 1370866_at   | AA944073  | ribosomal protein L41                                                                                                                                                    | Rpl41                                                                                    | 0.890 | 0.326 | 1.094 | 0.154 | 0.790 | 0.005 | 1.085 | 0.412 |
| 1398761_at   | NM_031099 | ribosomal protein L5                                                                                                                                                     | Rpl5                                                                                     | 0.779 | 0.305 | 0.910 | 0.160 | 0.814 | 0.040 | 0.819 | 0.066 |
| 1367567_at   | NM_053971 | ribosomal protein L6                                                                                                                                                     | Rpl6                                                                                     | 0.897 | 0.527 | 1.174 | 0.087 | 0.784 | 0.016 | 1.076 | 0.220 |
| 1394867_at   | AA944444  | Ribosomal protein L7                                                                                                                                                     | Rpl7                                                                                     | 1.312 | 0.890 | 1.068 | 0.532 | 0.846 | 0.101 | 0.833 | 0.139 |
| 1398917_at   | BF281221  | ribosomal protein L7                                                                                                                                                     | Rpl7                                                                                     | 0.941 | 0.899 | 1.070 | 0.725 | 0.643 | 0.086 | 0.947 | 0.543 |
| 1375788_at   | BM388719  | Ribosomal protein L7                                                                                                                                                     | Rpl7                                                                                     | 0.904 | 0.914 | 1.005 | 1.000 | 0.612 | 0.139 | 0.970 | 0.824 |
| 1371297_at   | BI281697  | ribosomal protein L7a (predicted)                                                                                                                                        | Rpl7a_predicted                                                                          | 0.914 | 0.101 | 1.168 | 0.118 | 0.789 | 0.068 | 1.048 | 0.531 |
| 1371305_at   | AI409193  | ribosomal protein L8                                                                                                                                                     | Rpl8                                                                                     | 0.795 | 0.806 | 1.328 | 0.111 | 0.630 | 0.125 | 1.098 | 0.257 |
| 1384714_x_at | BI850152  | ribosomal protein L8 /// similar to 60S ribosomal protein L8 (predicted)                                                                                                 | Rpl8 ///<br>RGD1561333_predicted                                                         | 0.983 | 0.975 | 1.484 | 0.081 | 0.825 | 0.223 | 1.047 | 0.326 |
| 1371301_at   | BG666892  | ribosomal protein L9                                                                                                                                                     | Rpl9                                                                                     | 0.849 | 0.323 | 1.028 | 0.745 | 0.792 | 0.039 | 0.989 | 0.809 |
| 1386868_at   | NM_031109 | ribosomal protein S10                                                                                                                                                    | Rps10                                                                                    | 0.874 | 0.577 | 1.253 | 0.139 | 0.742 | 0.042 | 1.179 | 0.051 |
| 1367630_at   | NM_031110 | ribosomal protein S11                                                                                                                                                    | Rps11                                                                                    | 0.869 | 0.711 | 0.987 | 0.364 | 0.722 | 0.040 | 0.962 | 0.808 |
| 1367640_at   | NM_031709 | ribosomal protein S12                                                                                                                                                    | Rps12                                                                                    | 1.056 | 0.661 | 1.311 | 0.059 | 0.849 | 0.256 | 1.228 | 0.023 |
| 1392232_at   | AI030983  | ribosomal protein S13                                                                                                                                                    | Rps13                                                                                    | 0.619 | 0.082 | 1.344 | 0.167 | 0.810 | 0.953 | 1.398 | 0.019 |
| 1398872_at   | BE107613  | ribosomal protein S13                                                                                                                                                    | Rps13                                                                                    | 0.881 | 0.553 | 1.336 | 0.025 | 0.723 | 0.016 | 1.248 | 0.053 |
| 1368211_at   | NM_022672 | ribosomal protein S14                                                                                                                                                    | Rps14                                                                                    | 0.825 | 0.804 | 1.176 | 0.325 | 0.653 | 0.084 | 1.069 | 0.534 |
| 1386874_at   | NM_017151 | ribosomal protein S15                                                                                                                                                    | Rps15                                                                                    | 0.848 | 0.692 | 1.017 | 0.898 | 0.719 | 0.013 | 1.046 | 0.658 |
| 1398775_at   | NM_053982 | ribosomal protein S15a                                                                                                                                                   | Rps15a                                                                                   | 0.945 | 0.848 | 1.550 | 0.023 | 0.789 | 0.270 | 1.377 | 0.005 |
| 1371318_at   | BG666872  | ribosomal protein S16                                                                                                                                                    | Rps16                                                                                    | 1.057 | 0.579 | 1.393 | 0.027 | 0.779 | 0.264 | 1.256 | 0.019 |
| 1367645_at   | NM_017152 | ribosomal protein S17                                                                                                                                                    | Rps17                                                                                    | 0.867 | 0.432 | 1.368 | 0.052 | 0.714 | 0.023 | 1.113 | 0.036 |
| 1388296_at   | BF281388  | ribosomal protein S18                                                                                                                                                    | Rps18                                                                                    | 1.000 | 0.894 | 1.270 | 0.097 | 0.812 | 0.295 | 1.173 | 0.037 |
| 1371377_at   | BG668512  | ribosomal protein S19                                                                                                                                                    | Rps19                                                                                    | 0.943 | 0.842 | 1.560 | 0.035 | 0.761 | 0.033 | 1.496 | 0.030 |
| 1367639_a_at | U92700    | ribosomal protein S2                                                                                                                                                     | Rps2                                                                                     | 0.696 | 0.585 | 1.290 | 0.131 | 0.726 | 0.045 | 1.062 | 0.595 |
| 1375219_a_at | AA944861  | ribosomal protein S2 /// similar to 40S ribosomal protein S2 (predicted) /// similar to ribosomal protein S2 (predicted) /// similar to ribosomal protein S2 (predicted) | Rps2 ///<br>RGD1561077_predicted ///<br>RGD1559516_predicted ///<br>RGD1559900_predicted | 0.844 | 0.323 | 1.495 | 0.022 | 0.882 | 0.064 | 1.267 | 0.110 |
| 1371295_at   | AW914097  | ribosomal protein S20                                                                                                                                                    | Rps20                                                                                    | 1.064 | 0.366 | 1.525 | 0.012 | 1.019 | 0.252 | 1.518 | 0.009 |
| 1398852_at   | BF410811  | ribosomal protein S21                                                                                                                                                    | Rps21                                                                                    | 0.935 | 0.331 | 1.056 | 0.093 | 0.905 | 0.021 | 0.943 | 0.814 |
| 1370242_at   | AA848284  | ribosomal protein S23                                                                                                                                                    | Rps23                                                                                    | 1.057 | 0.734 | 1.315 | 0.063 | 0.877 | 0.069 | 1.298 | 0.027 |

|              |           |                                                                                                                                                             |                                                              |       |       |       |       |       |       |       |       |
|--------------|-----------|-------------------------------------------------------------------------------------------------------------------------------------------------------------|--------------------------------------------------------------|-------|-------|-------|-------|-------|-------|-------|-------|
| 1390494_at   | AI177484  | ribosomal protein S24                                                                                                                                       | Rps24                                                        | 0.810 | 0.207 | 1.385 | 0.286 | 0.642 | 0.169 | 0.977 | 0.908 |
| 1398546_at   | BF396217  | Ribosomal protein S24                                                                                                                                       | Rps24                                                        | 1.039 | 0.871 | 0.992 | 0.850 | 0.964 | 0.860 | 0.998 | 0.884 |
| 1369966_a_at | BG375811  | ribosomal protein S24                                                                                                                                       | Rps24                                                        | 0.936 | 0.911 | 0.997 | 0.817 | 0.771 | 0.017 | 1.007 | 0.943 |
| 1388313_at   | BM389289  | ribosomal protein s25                                                                                                                                       | Rps25                                                        | 0.818 | 0.529 | 1.066 | 0.508 | 0.746 | 0.061 | 1.024 | 0.735 |
| 1367596_at   | NM_013224 | ribosomal protein S26                                                                                                                                       | Rps26                                                        | 0.954 | 0.601 | 1.186 | 0.170 | 0.771 | 0.130 | 0.963 | 0.537 |
| 1367717_at   | NM_053597 | ribosomal protein S27                                                                                                                                       | Rps27                                                        | 0.964 | 0.848 | 1.312 | 0.019 | 0.806 | 0.074 | 1.290 | 0.086 |
| 1367685_at   | NM_031113 | ribosomal protein S27a                                                                                                                                      | Rps27a                                                       | 0.870 | 0.899 | 1.008 | 0.705 | 0.764 | 0.112 | 0.978 | 0.844 |
| 1387890_at   | AI229633  | ribosomal protein S29                                                                                                                                       | Rps29                                                        | 0.832 | 0.059 | 1.134 | 0.649 | 0.751 | 0.016 | 1.010 | 0.883 |
| 1371299_at   | BG665124  | ribosomal protein S3                                                                                                                                        | Rps3                                                         | 0.775 | 0.708 | 1.127 | 0.382 | 0.617 | 0.129 | 1.034 | 0.787 |
| 1367606_at   | NM_017153 | ribosomal protein S3a                                                                                                                                       | Rps3a                                                        | 0.819 | 0.594 | 1.034 | 0.410 | 0.681 | 0.125 | 0.941 | 0.249 |
| 1371308_at   | AA799501  | ribosomal protein S4, X-linked                                                                                                                              | Rps4x                                                        | 0.821 | 0.763 | 1.080 | 0.642 | 0.657 | 0.165 | 0.989 | 0.561 |
| 1377843_at   | BF548385  | Ribosomal protein S5                                                                                                                                        | Rps5                                                         | 0.825 | 0.858 | 1.662 | 0.005 | 0.734 | 0.999 | 1.212 | 0.095 |
| 1398882_at   | BI282255  | ribosomal protein S5                                                                                                                                        | Rps5                                                         | 0.804 | 0.975 | 1.323 | 0.073 | 0.588 | 0.129 | 1.126 | 0.114 |
| 1367573_at   | NM_017160 | ribosomal protein S6                                                                                                                                        | Rps6                                                         | 0.872 | 0.343 | 1.155 | 0.150 | 0.721 | 0.005 | 1.068 | 0.353 |
| 1383454_a_at | BM389456  | ribosomal protein S6 kinase, polypeptide 1                                                                                                                  | Rps6kc1                                                      | 1.167 | 0.144 | 0.990 | 0.388 | 1.099 | 0.266 | 0.485 | 0.007 |
| 1390689_at   | BF401605  | ribosomal protein S6 kinase, polypeptide 1                                                                                                                  | Rps6kc1                                                      | 1.249 | 0.168 | 0.980 | 0.141 | 0.547 | 0.051 | 1.166 | 0.242 |
| 1368116_a_at | M57428    | ribosomal protein S6 kinase, polypeptide 1                                                                                                                  | Rps6kb1                                                      | 1.029 | 0.697 | 1.239 | 0.783 | 1.107 | 0.079 | 1.080 | 0.991 |
| 1389494_at   | BM388595  | ribosomal protein S6 kinase, polypeptide 4 (predicted)                                                                                                      | Rps6ka4_predicted                                            | 0.756 | 0.055 | 0.518 | 0.074 | 1.040 | 0.605 | 0.642 | 0.102 |
| 1382271_at   | AA955815  | Ribosomal protein S6 kinase, polypeptide 5 (predicted)                                                                                                      | Rps6ka5_predicted                                            | 0.381 | 0.089 | 1.059 | 0.516 | 0.479 | 0.049 | 0.852 | 0.921 |
| 1398582_at   | AI045780  | Ribosomal protein S6 kinase, polypeptide 5 (predicted)                                                                                                      | Rps6ka5_predicted                                            | 1.371 | 0.554 | 1.222 | 0.807 | 1.420 | 0.309 | 1.257 | 0.842 |
| 1367597_at   | NM_031706 | ribosomal protein S8                                                                                                                                        | Rps8                                                         | 0.972 | 0.590 | 1.478 | 0.002 | 0.762 | 0.010 | 1.456 | 0.004 |
| 1387888_at   | AA799768  | ribosomal protein S9                                                                                                                                        | Rps9                                                         | 0.828 | 0.675 | 1.071 | 0.194 | 0.654 | 0.092 | 0.921 | 0.518 |
| 1388244_s_at | BG153272  | ribosomal protein SA                                                                                                                                        | Rpsa                                                         | 0.827 | 0.143 | 1.098 | 0.365 | 0.799 | 0.020 | 0.997 | 0.939 |
| 1367569_at   | NM_017138 | ribosomal protein SA                                                                                                                                        | Rpsa                                                         | 0.720 | 0.587 | 0.970 | 0.844 | 0.656 | 0.065 | 0.889 | 0.261 |
| 1371189_x_at | BG153272  | ribosomal protein SA /// similar to 40S ribosomal protein SA (p40) (34/67 kDa laminin receptor) (predicted) /// similar to Ribosomal protein SA (predicted) | Rpsa ///<br>RGD1563757_predicted ///<br>RGD1566037_predicted | 0.881 | 0.135 | 1.044 | 0.422 | 0.805 | 0.259 | 1.004 | 0.819 |
| 1371340_at   | AW919054  | ribosomal protein, large P2 /// similar to 60S acidic ribosomal protein P2 (predicted)                                                                      | Rplp2 ///<br>RGD1566221_predicted                            | 0.898 | 0.761 | 1.165 | 0.036 | 0.924 | 0.080 | 1.071 | 0.050 |
| 1371307_at   | AW914090  | ribosomal protein, large, P1                                                                                                                                | Rplp1                                                        | 0.948 | 0.819 | 1.067 | 0.314 | 0.820 | 0.058 | 0.994 | 0.569 |
| 1372431_at   | AI575434  | ribosomal protein, mitochondrial, L12                                                                                                                       | Mrpl12                                                       | 0.324 | 0.115 | 1.499 | 0.001 | 0.483 | 0.021 | 1.413 | 0.060 |
| 1373477_at   | BM390306  | ribosomal protein, mitochondrial, L15                                                                                                                       | Mrpl19                                                       | 0.509 | 0.096 | 2.155 | 0.019 | 0.333 | 0.077 | 1.980 | 0.008 |
| 1367686_at   | NM_030835 | ribosome associated membrane protein 4                                                                                                                      | RAMP4                                                        | 0.574 | 0.196 | 0.762 | 0.001 | 0.673 | 0.197 | 0.743 | 0.002 |
| 1386900_at   | AI103695  | ribosome associated membrane protein 4                                                                                                                      | RAMP4                                                        | 0.615 | 0.456 | 1.490 | 0.152 | 0.632 | 0.043 | 1.314 | 0.318 |
| 1388413_at   | BI282760  | ribosome binding protein 1 homolog 180kDa (dog) (predicted)                                                                                                 | Rrbp1_predicted                                              | 1.144 | 0.002 | 1.741 | 0.010 | 1.065 | 0.804 | 1.460 | 0.043 |
| 1383500_at   | BI279795  | ribosome binding protein 1 homolog 180kDa (dog) (predicted)                                                                                                 | Rrbp1_predicted                                              | 0.885 | 0.199 | 1.137 | 0.263 | 0.839 | 0.208 | 1.056 | 0.190 |
| 1378709_at   | BI300330  | Ribulose-5-phosphate-3-epimerase (predicted)                                                                                                                | Rpe_predicted                                                | 1.001 | 0.116 | 1.020 | 0.622 | 1.002 | 0.984 | 0.997 | 0.086 |
| 1371020_at   | BE102826  | RIM binding protein 2                                                                                                                                       | Rimbp2                                                       | 0.755 | 0.103 | 0.477 | 0.015 | 0.681 | 0.069 | 0.681 | 0.149 |
| 1377623_at   | AA925355  | ring finger (C3HC4 type) and KH domain containing 1 (predicted)                                                                                             | Rkhd1_predicted                                              | 1.219 | 0.054 | 1.976 | 0.003 | 1.026 | 0.231 | 1.616 | 0.031 |
| 1388651_at   | AA800053  | ring finger and CHY zinc finger domain containing 1                                                                                                         | Rchyl                                                        | 0.717 | 0.182 | 0.917 | 0.213 | 0.908 | 0.317 | 0.980 | 0.686 |
| 1377590_at   | BF420493  | Ring finger and FYVE like domain containing protein                                                                                                         | Rffl                                                         | 1.329 | 0.045 | 0.999 | 0.990 | 1.061 | 0.023 | 1.005 | 0.825 |
| 1385504_at   | AW524664  | ring finger and FYVE like domain containing protein                                                                                                         | Rffl                                                         | 1.087 | 0.580 | 1.207 | 0.106 | 1.120 | 0.550 | 1.229 | 0.192 |
| 1374545_at   | AA945202  | ring finger and KH domain containing 2 (predicted)                                                                                                          | Rkhd2_predicted                                              | 1.425 | 0.003 | 1.508 | 0.020 | 1.352 | 0.030 | 1.399 | 0.007 |
| 1380682_at   | BF396302  | Ring finger and KH domain containing 3 (predicted)                                                                                                          | Rkhd3_predicted                                              | 1.019 | 0.343 | 0.874 | 0.177 | 0.523 | 0.004 | 0.903 | 0.059 |
| 1388937_at   | BF283351  | ring finger protein (C3HC4 type) 19 (predicted)                                                                                                             | Rnf19_predicted                                              | 1.258 | 0.055 | 1.085 | 0.041 | 1.234 | 0.174 | 1.286 | 0.039 |
| 1378524_at   | AW533310  | ring finger protein (C3HC4 type) 19 (predicted)                                                                                                             | Rnf19_predicted                                              | 1.352 | 0.186 | 0.622 | 0.104 | 0.509 | 0.071 | 0.498 | 0.025 |
| 1375891_at   | BG379665  | ring finger protein 1                                                                                                                                       | Ring1                                                        | 0.633 | 0.176 | 1.012 | 0.458 | 0.901 | 0.556 | 0.760 | 0.015 |
| 1371526_at   | BG371468  | ring finger protein 10                                                                                                                                      | Rnf10                                                        | 0.800 | 0.232 | 1.181 | 0.092 | 0.872 | 0.200 | 0.988 | 0.058 |
| 1368122_at   | NM_053438 | ring finger protein 103                                                                                                                                     | Rnf103                                                       | 0.521 | 0.066 | 0.629 | 0.020 | 0.359 | 0.001 | 0.579 | 0.020 |
| 1373015_at   | BI280348  | ring finger protein 11 (predicted)                                                                                                                          | Rnf11_predicted                                              | 0.943 | 0.695 | 0.880 | 0.088 | 0.823 | 0.245 | 0.916 | 0.127 |
| 1373456_at   | BI300764  | ring finger protein 111 (predicted)                                                                                                                         | Rnf111_predicted                                             | 1.075 | 0.642 | 0.891 | 0.228 | 0.969 | 0.859 | 0.948 | 0.606 |
| 1367544_at   | BE120556  | ring finger protein 111 (predicted)                                                                                                                         | Rnf111_predicted                                             | 1.063 | 0.769 | 0.854 | 0.025 | 0.894 | 0.452 | 0.945 | 0.181 |
| 1390524_at   | BM392295  | ring finger protein 12                                                                                                                                      | Rnf12                                                        | 0.895 | 0.681 | 4.592 | 0.000 | 0.804 | 0.095 | 3.053 | 0.033 |
| 1385403_at   | AI071834  | ring finger protein 121 (predicted)                                                                                                                         | Rnf121_predicted                                             | 1.755 | 0.113 | 1.715 | 0.278 | 1.475 | 0.118 | 1.348 | 0.153 |
| 1386639_at   | BF549828  | ring finger protein 121 (predicted)                                                                                                                         | Rnf121_predicted                                             | 1.152 | 0.191 | 0.743 | 0.472 | 0.929 | 0.444 | 0.966 | 0.265 |
| 1385644_at   | AI058291  | ring finger protein 121 (predicted)                                                                                                                         | Rnf121_predicted                                             | 1.010 | 0.762 | 1.664 | 0.186 | 0.888 | 0.364 | 0.857 | 0.613 |
| 1384098_at   | AA925710  | ring finger protein 125 (predicted)                                                                                                                         | Rnf125_predicted                                             | 1.401 | 0.499 | 1.307 | 0.078 | 1.011 | 0.780 | 1.304 | 0.439 |
| 1381764_s_at | AA819792  | ring finger protein 126                                                                                                                                     | Rnf126                                                       | 0.990 | 0.285 | 1.393 | 0.115 | 0.703 | 0.017 | 1.215 | 0.496 |
| 1376639_at   | AW252111  | ring finger protein 126                                                                                                                                     | Rnf126                                                       | 1.001 | 0.968 | 1.008 | 0.986 | 0.999 | 0.926 | 1.008 | 0.967 |
| 1387201_at   | NM_053588 | ring finger protein 138                                                                                                                                     | Rnf138                                                       | 1.765 | 0.155 | 5.225 | 0.003 | 2.682 | 0.024 | 4.304 | 0.004 |
| 1389258_at   | AI317840  | ring finger protein 138                                                                                                                                     | Rnf138                                                       | 1.379 | 0.277 | 0.867 | 0.748 | 1.632 | 0.010 | 0.918 | 0.899 |

|              |           |                                                        |                  |       |       |        |       |       |       |        |       |
|--------------|-----------|--------------------------------------------------------|------------------|-------|-------|--------|-------|-------|-------|--------|-------|
| 1377564_at   | AI549166  | Ring finger protein 138                                | Rnf138           | 1.370 | 0.445 | 1.548  | 0.599 | 1.373 | 0.239 | 0.911  | 0.459 |
| 1382379_at   | AW529177  | ring finger protein 138                                | Rnf138           | 1.408 | 0.468 | 1.856  | 0.015 | 3.034 | 0.020 | 1.565  | 0.010 |
| 1376440_at   | BF391522  | ring finger protein 139 (predicted)                    | Rnf139_predicted | 2.628 | 0.019 | 2.160  | 0.026 | 4.517 | 0.004 | 2.893  | 0.011 |
| 1388995_at   | BF407666  | ring finger protein 14                                 | Rnf14            | 0.921 | 0.502 | 1.217  | 0.032 | 1.020 | 0.269 | 1.286  | 0.014 |
| 1394698_at   | AI535431  | Ring finger protein 146                                | Rnf146           | 0.800 | 0.227 | 0.874  | 0.771 | 0.611 | 0.128 | 0.542  | 0.095 |
| 1371778_at   | BI296773  | ring finger protein 146                                | Rnf146           | 1.237 | 0.361 | 1.232  | 0.026 | 0.870 | 0.979 | 1.133  | 0.325 |
| 1389525_at   | AI171788  | ring finger protein 149                                | Rnf149           | 0.838 | 0.500 | 1.257  | 0.007 | 0.712 | 0.177 | 1.121  | 0.428 |
| 1373471_at   | AI548624  | ring finger protein 166                                | Rnf166           | 0.843 | 0.059 | 0.635  | 0.019 | 0.586 | 0.095 | 0.623  | 0.021 |
| 1388636_at   | BI280272  | ring finger protein 167                                | Rnf167           | 0.901 | 0.930 | 0.775  | 0.135 | 0.886 | 0.083 | 0.872  | 0.302 |
| 1371597_at   | BI281621  | ring finger protein 187 (predicted)                    | Rnf187_predicted | 0.533 | 0.061 | 0.472  | 0.013 | 0.521 | 0.001 | 0.466  | 0.013 |
| 1383269_at   | BF556833  | ring finger protein 2                                  | Rnf2             | 0.925 | 0.036 | 1.323  | 0.163 | 1.108 | 0.290 | 0.882  | 0.328 |
| 1376805_at   | BF559331  | Ring finger protein 2                                  | Rnf2             | 0.682 | 0.128 | 1.457  | 0.041 | 0.856 | 0.361 | 1.251  | 0.021 |
| 1378022_at   | BE113167  | ring finger protein 20 (predicted)                     | Rnf20_predicted  | 1.011 | 0.275 | 1.220  | 0.055 | 0.942 | 0.501 | 1.060  | 0.553 |
| 1372088_at   | AI012434  | ring finger protein 25                                 | Rnf25            | 2.775 | 0.017 | 2.598  | 0.005 | 2.332 | 0.020 | 1.794  | 0.024 |
| 1398336_at   | AI012577  | ring finger protein 25                                 | Rnf25            | 1.261 | 0.776 | 0.974  | 0.488 | 1.738 | 0.045 | 0.810  | 0.942 |
| 1395571_at   | BF557189  | ring finger protein 3 (predicted)                      | Rnf3_predicted   | 0.961 | 0.917 | 1.120  | 0.833 | 0.796 | 0.072 | 1.038  | 0.493 |
| 1383679_at   | BF411972  | ring finger protein 31 (predicted)                     | Rnf31_predicted  | 1.758 | 0.158 | 2.410  | 0.001 | 2.621 | 0.001 | 2.646  | 0.001 |
| 1388993_at   | AI179991  | ring finger protein 34                                 | Rnf34            | 1.451 | 0.209 | 1.461  | 0.138 | 1.057 | 0.740 | 1.089  | 0.063 |
| 1387329_at   | NM_134467 | ring finger protein 38                                 | Rnf38            | 1.013 | 0.849 | 1.018  | 0.751 | 1.001 | 0.995 | 0.862  | 0.486 |
| 1368662_at   | NM_134374 | ring finger protein 39                                 | Rnf39            | 1.113 | 0.332 | 0.915  | 0.904 | 2.337 | 0.125 | 1.002  | 0.985 |
| 1371489_at   | AI011748  | Ring finger protein 4                                  | Rnf4             | 0.743 | 0.429 | 1.246  | 0.026 | 0.972 | 0.420 | 1.274  | 0.093 |
| 1388089_a_at | AY050655  | ring finger protein 4                                  | Rnf4             | 0.841 | 0.745 | 2.171  | 0.037 | 0.837 | 0.661 | 1.236  | 0.195 |
| 1387458_at   | NM_019182 | ring finger protein 4                                  | Rnf4             | 1.029 | 0.944 | 1.094  | 0.672 | 0.633 | 0.194 | 0.795  | 0.174 |
| 1384374_at   | BF523755  | Ring finger protein 41                                 | Rnf41            | 1.022 | 0.714 | 0.890  | 0.232 | 0.989 | 0.676 | 0.882  | 0.261 |
| 1391252_at   | BI290717  | ring finger protein 41                                 | Rnf41            | 1.193 | 0.756 | 1.133  | 0.790 | 0.825 | 0.114 | 1.296  | 0.633 |
| 1395276_at   | AA899483  | Ring finger protein 7 (predicted)                      | Rnf7_predicted   | 1.729 | 0.036 | 1.458  | 0.869 | 1.079 | 0.298 | 0.955  | 0.552 |
| 1371638_at   | AA858518  | ring finger protein 7 (predicted)                      | Rnf7_predicted   | 0.775 | 0.610 | 0.772  | 0.314 | 0.639 | 0.058 | 0.984  | 0.348 |
| 1389069_at   | BM384061  | ring finger protein 8                                  | Rnf8             | 1.225 | 0.124 | 1.079  | 0.313 | 2.025 | 0.205 | 1.180  | 0.120 |
| 1383034_at   | AA998572  | RING1 and YY1 binding protein (predicted)              | Rybp_predicted   | 1.154 | 0.251 | 5.245  | 0.000 | 1.136 | 0.240 | 2.780  | 0.025 |
| 1372674_at   | BE107155  | RING1 and YY1 binding protein (predicted)              | Rybp_predicted   | 0.981 | 0.898 | 0.915  | 0.445 | 0.795 | 0.072 | 0.899  | 0.372 |
| 1393406_at   | AI576602  | Ring-box 1                                             | Rbx1             | 0.908 | 0.173 | 0.772  | 0.213 | 0.724 | 0.285 | 0.884  | 0.230 |
| 1388333_at   | BF291171  | ring-box 1                                             | Rbx1             | 0.721 | 0.914 | 1.295  | 0.214 | 0.688 | 0.270 | 1.434  | 0.005 |
| 1388538_at   | AI179646  | ring-box 1                                             | Rbx1             | 0.766 | 0.954 | 0.356  | 0.002 | 1.110 | 0.436 | 0.666  | 0.023 |
| 1385856_at   | BE096718  | RIO kinase 1 (yeast)                                   | Riok1            | 1.061 | 0.855 | 1.310  | 0.354 | 1.148 | 0.695 | 1.003  | 0.614 |
| 1377503_at   | BG371773  | RIO kinase 2 (yeast)                                   | Riok2            | 0.743 | 0.028 | 1.248  | 0.159 | 0.991 | 0.122 | 1.205  | 0.086 |
| 1390047_at   | BG378174  | RIO kinase 3 (yeast) (predicted)                       | Riok3_predicted  | 1.520 | 0.069 | 3.297  | 0.002 | 1.461 | 0.027 | 1.903  | 0.020 |
| 1394363_at   | H34775    | RIO kinase 3 (yeast) (predicted)                       | Riok3_predicted  | 1.955 | 0.142 | 17.162 | 0.000 | 1.669 | 0.560 | 11.791 | 0.000 |
| 1395699_at   | BE126478  | RIO kinase 3 (yeast) (predicted)                       | Riok3_predicted  | 1.025 | 0.396 | 3.824  | 0.008 | 0.890 | 0.440 | 2.213  | 0.039 |
| 1372867_at   | AI177333  | RNA (guanine-7-) methyltransferase                     | Rnmt             | 1.484 | 0.044 | 1.098  | 0.131 | 2.401 | 0.042 | 1.702  | 0.083 |
| 1382998_at   | AI044778  | RNA (guanine-7-) methyltransferase                     | Rnmt             | 2.647 | 0.053 | 3.291  | 0.028 | 1.440 | 0.052 | 2.040  | 0.010 |
| 1398572_at   | BI294251  | RNA (guanine-7-) methyltransferase                     | Rnmt             | 1.370 | 0.408 | 1.209  | 0.344 | 1.647 | 0.020 | 1.303  | 0.015 |
| 1393088_at   | BF554013  | RNA (guanine-9-) methyltransferase domain containing 1 | Rg9mtd1          | 0.825 | 0.764 | 2.077  | 0.034 | 0.610 | 0.095 | 2.148  | 0.060 |
| 1390933_a_at | BF283097  | RNA (guanine-9-) methyltransferase domain containing 3 | Rg9mtd3          | 0.819 | 0.403 | 1.281  | 0.209 | 0.707 | 0.091 | 1.088  | 0.223 |
| 1370356_at   | D83948    | RNA binding motif protein 10                           | Rbm10            | 0.947 | 0.892 | 1.443  | 0.185 | 0.753 | 0.325 | 1.182  | 0.019 |
| 1377656_at   | BG375054  | RNA binding motif protein 13                           | Rbm13            | 0.559 | 0.464 | 1.216  | 0.058 | 0.519 | 0.185 | 1.421  | 0.061 |
| 1389664_at   | BM387379  | RNA binding motif protein 15B (predicted)              | Rbm15b_predicted | 1.773 | 0.023 | 1.123  | 0.414 | 1.801 | 0.011 | 1.144  | 0.106 |
| 1369896_s_at | NM_139094 | RNA binding motif protein 16                           | Rbm16            | 0.901 | 0.440 | 1.076  | 0.280 | 0.759 | 0.028 | 1.021  | 0.431 |
| 1388355_at   | BF396644  | RNA binding motif protein 17                           | Rbm17            | 0.743 | 0.104 | 1.109  | 0.843 | 0.749 | 0.034 | 0.922  | 0.704 |
| 1371952_at   | AI010954  | RNA binding motif protein 18 (predicted)               | Rbm18_predicted  | 0.832 | 0.777 | 0.982  | 0.481 | 0.899 | 0.955 | 0.781  | 0.131 |
| 1392503_at   | BE100371  | RNA binding motif protein 22                           | Rbm22            | 0.946 | 0.678 | 1.279  | 0.009 | 0.784 | 0.489 | 1.204  | 0.066 |
| 1382013_at   | AI071118  | RNA binding motif protein 24 (predicted)               | Rbm24_predicted  | 0.554 | 0.148 | 0.419  | 0.080 | 0.464 | 0.034 | 0.498  | 0.011 |
| 1388751_at   | AW433787  | RNA binding motif protein 24 (predicted)               | Rbm24_predicted  | 0.519 | 0.167 | 0.467  | 0.005 | 0.484 | 0.001 | 0.557  | 0.004 |
| 1388886_at   | BM392240  | RNA binding motif protein 25 (predicted)               | Rbm25_predicted  | 1.227 | 0.390 | 0.822  | 0.020 | 0.963 | 0.659 | 0.627  | 0.065 |
| 1391848_at   | BG376780  | RNA binding motif protein 27 (predicted)               | Rbm27_predicted  | 0.924 | 0.556 | 1.016  | 0.670 | 1.076 | 0.605 | 0.998  | 0.355 |
| 1389981_at   | BE116889  | RNA binding motif protein 27 (predicted)               | Rbm27_predicted  | 0.938 | 0.618 | 0.805  | 0.077 | 0.770 | 0.014 | 0.841  | 0.127 |
| 1395520_at   | AW530017  | RNA binding motif protein 28 (predicted)               | Rbm28_predicted  | 0.847 | 0.961 | 1.441  | 0.502 | 0.943 | 0.313 | 1.171  | 0.620 |
| 1371583_at   | AI598399  | RNA binding motif protein 3                            | Rbm3             | 1.108 | 0.394 | 1.324  | 0.145 | 1.029 | 0.444 | 1.262  | 0.199 |
| 1389065_at   | BM392304  | RNA binding motif protein 34                           | Rbm34            | 0.937 | 0.149 | 0.998  | 0.369 | 0.972 | 0.852 | 1.040  | 0.869 |
| 1385199_a_at | AI073196  | RNA binding motif protein 34                           | Rbm34            | 1.098 | 0.298 | 2.154  | 0.015 | 1.346 | 0.415 | 1.986  | 0.025 |
| 1374844_at   | BF284573  | RNA binding motif protein 4 (predicted)                | Rbm4_predicted   | 0.411 | 0.003 | 1.221  | 0.166 | 0.659 | 0.091 | 1.302  | 0.219 |
| 1384091_at   | AA899909  | RNA binding motif protein 4 (predicted)                | Rbm4_predicted   | 0.534 | 0.293 | 0.946  | 0.721 | 0.481 | 0.107 | 0.735  | 0.128 |



|              |           |                                                               |                   |        |       |        |       |        |       |        |       |
|--------------|-----------|---------------------------------------------------------------|-------------------|--------|-------|--------|-------|--------|-------|--------|-------|
| 1395762_at   | BG670091  | RNA binding motif protein 4 (predicted)                       | Rbm4_predicted    | 1.343  | 0.445 | 1.450  | 0.011 | 1.480  | 0.160 | 1.254  | 0.180 |
| 1372251_at   | BI282892  | RNA binding motif protein 5                                   | Rbm5              | 0.801  | 0.148 | 0.802  | 0.285 | 0.689  | 0.012 | 0.867  | 0.343 |
| 1382749_at   | BI293987  | RNA binding motif protein 5                                   | Rbm5              | 1.178  | 0.807 | 0.807  | 0.865 | 1.044  | 0.607 | 1.187  | 0.667 |
| 1394155_at   | AI010943  | RNA binding motif protein 7 (predicted)                       | Rbm7_predicted    | 2.860  | 0.017 | 1.973  | 0.048 | 2.131  | 0.042 | 1.224  | 0.477 |
| 1376503_a_at | BE104991  | RNA binding motif protein 7 (predicted)                       | Rbm7_predicted    | 1.496  | 0.203 | 1.376  | 0.120 | 1.380  | 0.128 | 1.163  | 0.584 |
| 1372829_at   | BE113079  | RNA binding motif protein 8 (predicted)                       | Rbm8_predicted    | 0.856  | 0.534 | 1.255  | 0.108 | 0.618  | 0.038 | 1.105  | 0.458 |
| 1396310_at   | BF545380  | RNA binding motif protein 9 (predicted)                       | Rbm9_predicted    | 1.723  | 0.014 | 1.002  | 0.962 | 1.270  | 0.668 | 0.925  | 0.638 |
| 1385281_at   | BF388412  | RNA binding motif protein 9 (predicted)                       | Rbm9_predicted    | 0.937  | 0.354 | 1.222  | 0.735 | 0.486  | 0.393 | 1.538  | 0.455 |
| 1388794_at   | BE107489  | RNA binding motif protein, X chromosome retrogene (predicted) | Rbmxrt_predicted  | 0.666  | 0.304 | 1.132  | 0.295 | 0.731  | 0.121 | 1.231  | 0.033 |
| 1375870_a_at | BF420140  | RNA binding motif, single stranded interacting protein 1      | Rbms1             | 6.171  | 0.002 | 1.506  | 0.015 | 7.708  | 0.002 | 2.896  | 0.002 |
| 1394888_at   | AW920350  | RNA binding motif, single stranded interacting protein 1      | Rbms1             | 0.863  | 0.668 | 1.113  | 0.850 | 0.971  | 0.520 | 1.229  | 0.945 |
| 1390032_at   | BG374052  | RNA binding motif, single stranded interacting protein 2      | Rbms2             | 0.510  | 0.036 | 0.932  | 0.420 | 0.515  | 0.001 | 0.919  | 0.155 |
| 1391921_at   | AW530941  | RNA guanylyltransferase and 5'-phosphatase (predicted)        | Rngtt_predicted   | 1.221  | 0.068 | 1.059  | 0.072 | 1.538  | 0.027 | 1.000  | 0.999 |
| 1396373_at   | BF416860  | RNA guanylyltransferase and 5'-phosphatase (predicted)        | Rngtt_predicted   | 1.537  | 0.563 | 1.231  | 0.451 | 1.097  | 0.817 | 1.505  | 0.169 |
| 1374289_at   | AA818183  | RNA polymerase 1-1                                            | Rpo1-1            | 0.800  | 0.711 | 1.387  | 0.023 | 0.394  | 0.018 | 1.236  | 0.111 |
| 1387268_at   | NM_031773 | RNA polymerase 1-2                                            | Rpo1-2            | 0.436  | 0.064 | 2.330  | 0.028 | 0.421  | 0.002 | 1.794  | 0.010 |
| 1387098_at   | NM_031772 | RNA polymerase 1-4                                            | Rpo1-4            | 1.001  | 0.827 | 0.999  | 0.265 | 1.007  | 0.852 | 0.998  | 0.586 |
| 1391815_at   | BG664098  | RNA pseudouridylyl synthase domain containing 3 (predicted)   | Rpusd3_predicted  | 1.032  | 0.716 | 0.541  | 0.074 | 0.949  | 0.591 | 0.553  | 0.061 |
| 1372370_at   | AI233741  | RNA pseudouridylyl synthase domain containing 4               | Rpusd4            | 1.046  | 0.660 | 0.841  | 0.250 | 0.998  | 0.602 | 1.117  | 0.576 |
| 1388529_at   | AI237372  | RNA terminal phosphate cyclase domain 1                       | Rtcd1             | 0.710  | 0.045 | 1.489  | 0.054 | 0.489  | 0.017 | 1.508  | 0.253 |
| 1373452_at   | AI232273  | RNA terminal phosphate cyclase-like 1                         | Rcl1              | 1.192  | 0.859 | 3.344  | 0.019 | 1.346  | 0.338 | 1.930  | 0.052 |
| 1378639_at   | BM389576  | RNA, U transporter 1                                          | Rnut1             | 0.692  | 0.015 | 0.828  | 0.060 | 0.669  | 0.027 | 0.832  | 0.300 |
| 1374836_at   | AA964554  | RNA, U3 small nucleolar interacting protein 2 (predicted)     | Rnu3ip2_predicted | 0.983  | 0.644 | 1.420  | 0.145 | 0.617  | 0.919 | 1.317  | 0.152 |
| 1377746_at   | AI010418  | RNA-binding protein 12                                        | Rbm12             | 0.446  | 0.012 | 0.973  | 0.115 | 0.468  | 0.005 | 1.027  | 0.719 |
| 1395092_at   | BM388276  | RNA-binding region (RNP1, RRM) containing 2                   | Rnpc2             | 2.779  | 0.024 | 1.027  | 0.145 | 1.872  | 0.772 | 1.170  | 0.799 |
| 1398993_at   | AI045458  | RNA-binding region (RNP1, RRM) containing 2                   | Rnpc2             | 1.483  | 0.070 | 1.937  | 0.008 | 1.594  | 0.017 | 1.527  | 0.033 |
| 1379737_a_at | BG372903  | RNA-binding region (RNP1, RRM) containing 2                   | Rnpc2             | 1.362  | 0.101 | 1.467  | 0.010 | 1.539  | 0.031 | 1.559  | 0.033 |
| 1381967_at   | BE114972  | RNA-binding region (RNP1, RRM) containing 2                   | Rnpc2             | 1.303  | 0.301 | 1.581  | 0.012 | 1.264  | 0.084 | 1.624  | 0.004 |
| 1399101_at   | AA849715  | RNA-binding region (RNP1, RRM) containing 2                   | Rnpc2             | 1.093  | 0.691 | 0.569  | 0.013 | 1.332  | 0.574 | 0.847  | 0.277 |
| 1389666_at   | AA892855  | rod outer segment membrane protein 1                          | Rom1              | 0.867  | 0.853 | 0.965  | 0.502 | 0.982  | 0.961 | 0.903  | 0.380 |
| 1374647_at   | BI299718  | rosbin, round spermatid basic protein 1 (predicted)           | Rsbm1_predicted   | 1.736  | 0.014 | 1.225  | 0.264 | 1.427  | 0.060 | 1.085  | 0.611 |
| 1396963_at   | BF404522  | Roundabout homolog 1 (Drosophila)                             | Robo1             | 1.002  | 0.734 | 1.259  | 0.158 | 1.021  | 0.724 | 0.947  | 0.249 |
| 1379693_at   | AI409154  | Roundabout homolog 2 (Drosophila)                             | Robo2             | 0.763  | 0.662 | 0.149  | 0.004 | 1.051  | 0.816 | 0.438  | 0.024 |
| 1379750_at   | BE119799  | roundabout homolog 2 (Drosophila)                             | Robo2             | 0.701  | 0.682 | 0.431  | 0.230 | 0.399  | 0.066 | 0.583  | 0.196 |
| 1389030_a_at | BI282912  | Rous sarcoma oncogene                                         | Src               | 0.975  | 0.558 | 1.192  | 0.749 | 0.767  | 0.540 | 0.999  | 0.988 |
| 1370751_at   | U77931    | rRNA promoter binding protein                                 | LOC257642         | 1.534  | 0.708 | 4.444  | 0.059 | 2.885  | 0.507 | 1.430  | 0.352 |
| 1371213_at   | AJ005023  | RT1 class I, A3                                               | RT1-A3            | 1.282  | 0.014 | 1.110  | 0.019 | 1.190  | 0.174 | 1.489  | 0.055 |
| 1388236_x_at | M24026    | RT1 class I, CE12                                             | RT1-CE12          | 2.755  | 0.143 | 5.825  | 0.013 | 2.986  | 0.131 | 8.071  | 0.009 |
| 1370463_x_at | U50449    | RT1 class I, CE16                                             | RT1-CE16          | 1.942  | 0.052 | 2.693  | 0.004 | 2.465  | 0.003 | 3.670  | 0.001 |
| 1370972_x_at | BI300597  | RT1 class I, CE5                                              | RT1-CE5           | 3.708  | 0.015 | 7.419  | 0.001 | 6.395  | 0.001 | 17.701 | 0.000 |
| 1388255_x_at | AJ243338  | RT1 class I, CE5                                              | RT1-CE5           | 1.960  | 0.164 | 9.571  | 0.000 | 6.106  | 0.030 | 23.167 | 0.000 |
| 1371209_at   | AJ243338  | RT1 class I, CE5                                              | RT1-CE5           | 1.611  | 0.320 | 4.437  | 0.090 | 5.149  | 0.038 | 12.557 | 0.027 |
| 1389089_at   | BM389027  | RT1 class I, locus Ke4                                        | RT1-Ke4           | 0.752  | 0.150 | 1.184  | 0.039 | 0.676  | 0.024 | 1.114  | 0.009 |
| 1388071_x_at | M24024    | RT1 class Ib, locus Aw2                                       | RT1-Aw2           | 3.920  | 0.000 | 3.802  | 0.001 | 4.417  | 0.000 | 4.902  | 0.000 |
| 1371078_at   | AI500830  | RT1 class Ib, locus Aw2                                       | RT1-Aw2           | 15.491 | 0.000 | 16.381 | 0.000 | 19.220 | 0.000 | 23.461 | 0.000 |
| 1379818_at   | BF288109  | RT1 class Ib, locus Aw2                                       | RT1-Aw2           | 35.192 | 0.000 | 16.652 | 0.000 | 37.729 | 0.000 | 17.872 | 0.000 |
| 1369110_x_at | NM_012645 | RT1 class Ib, locus Aw2                                       | RT1-Aw2           | 5.368  | 0.000 | 12.971 | 0.004 | 10.622 | 0.000 | 22.869 | 0.002 |
| 1396304_at   | BI292055  | RT1 class Ib, locus Aw2                                       | RT1-Aw2           | 4.650  | 0.001 | 1.906  | 0.020 | 5.238  | 0.020 | 3.786  | 0.006 |
| 1371171_at   | M10094    | RT1 class Ib, locus Aw2                                       | RT1-Aw2           | 5.948  | 0.001 | 5.547  | 0.000 | 7.672  | 0.000 | 8.082  | 0.002 |
| 1392954_at   | AI029637  | RT1 class Ib, locus Aw2                                       | RT1-Aw2           | 7.213  | 0.002 | 9.520  | 0.002 | 19.491 | 0.001 | 13.455 | 0.000 |
| 1379496_at   | AI029460  | RT1 class Ib, locus Aw2                                       | RT1-Aw2           | 6.453  | 0.002 | 7.100  | 0.010 | 7.619  | 0.004 | 10.019 | 0.018 |
| 1380415_at   | AI233027  | RT1 class Ib, locus Aw2                                       | RT1-Aw2           | 6.498  | 0.006 | 2.578  | 0.007 | 12.400 | 0.001 | 6.480  | 0.002 |
| 1393108_at   | BM387813  | RT1 class Ib, locus Aw2                                       | RT1-Aw2           | 7.377  | 0.006 | 5.645  | 0.001 | 10.230 | 0.002 | 6.680  | 0.001 |
| 1390562_s_at | BE102350  | RT1 class Ib, locus Aw2                                       | RT1-Aw2           | 6.529  | 0.008 | 4.611  | 0.011 | 7.855  | 0.000 | 7.141  | 0.000 |
| 1377036_at   | BE102350  | RT1 class Ib, locus Aw2                                       | RT1-Aw2           | 3.090  | 0.013 | 3.230  | 0.021 | 7.126  | 0.005 | 2.554  | 0.007 |
| 1379357_at   | AI408767  | RT1 class Ib, locus Aw2                                       | RT1-Aw2           | 5.609  | 0.018 | 5.542  | 0.009 | 7.964  | 0.013 | 7.955  | 0.005 |
| 1370429_at   | L40362    | RT1 class Ib, locus Aw2                                       | RT1-Aw2           | 6.651  | 0.022 | 5.583  | 0.054 | 11.450 | 0.014 | 12.556 | 0.010 |
| 1382437_at   | BM383464  | RT1 class Ib, locus Aw2                                       | RT1-Aw2           | 2.515  | 0.054 | 2.036  | 0.000 | 7.440  | 0.011 | 3.699  | 0.006 |
| 1379436_a_at | AA945875  | RT1 class Ib, locus Aw2                                       | RT1-Aw2           | 1.852  | 0.120 | 1.008  | 0.242 | 2.055  | 0.051 | 0.998  | 0.988 |
| 1388202_at   | BI395698  | RT1 class Ib, locus Aw2                                       | RT1-Aw2           | 3.240  | 0.132 | 5.289  | 0.013 | 4.167  | 0.090 | 8.948  | 0.009 |
| 1391266_at   | AI072881  | RT1 class Ib, locus Aw2                                       | RT1-Aw2           | 1.696  | 0.133 | 1.247  | 0.982 | 3.420  | 0.005 | 1.289  | 0.203 |

|              |           |                                                                                                                                                          |                                                                         |        |       |        |       |         |       |         |       |
|--------------|-----------|----------------------------------------------------------------------------------------------------------------------------------------------------------|-------------------------------------------------------------------------|--------|-------|--------|-------|---------|-------|---------|-------|
| 1371111_at   | X82669    | RT1 class Ib, locus Aw2                                                                                                                                  | RT1-Aw2                                                                 | 1.104  | 0.370 | 1.478  | 0.021 | 1.867   | 0.050 | 1.497   | 0.047 |
| 1377851_at   | AI012250  | RT1 class Ib, locus Aw2                                                                                                                                  | RT1-Aw2                                                                 | 1.910  | 0.509 | 4.935  | 0.046 | 12.896  | 0.058 | 4.068   | 0.112 |
| 1398027_at   | BF405186  | RT1 class Ib, locus Aw2                                                                                                                                  | RT1-Aw2                                                                 | 0.815  | 0.684 | 0.825  | 0.235 | 1.266   | 0.250 | 1.050   | 0.376 |
| 1375850_at   | BG371810  | RT1 class Ib, locus Aw2                                                                                                                                  | RT1-Aw2                                                                 | 0.719  | 0.704 | 1.216  | 0.077 | 1.122   | 0.097 | 0.880   | 0.455 |
| 1390100_s_at | BG371810  | RT1 class Ib, locus Aw2                                                                                                                                  | RT1-Aw2                                                                 | 0.792  | 0.864 | 1.077  | 0.347 | 1.001   | 0.701 | 0.674   | 0.227 |
| 1388203_x_at | BI395698  | RT1 class Ib, locus Aw2 /// histocompatibility 2, T region locus 24 /// RT1 class I, CE2 /// RT1-149 protein /// RT1 class I, CE15 /// RT1 class I, CE10 | RT1-Aw2 /// RT1-T24-1 /// RT1-CE2 /// RT1-149 /// RT1-CE15 /// RT1-CE10 | 2.871  | 0.125 | 5.987  | 0.019 | 3.448   | 0.080 | 8.639   | 0.012 |
| 1371267_at   | M64795    | RT1 class Ib, locus Aw2 /// RT1 class I, CE12 /// RT1 class I, CE1 /// RT1 class I, CE2 /// RT1 class I, CE15                                            | RT1-Aw2 /// RT1-CE12 /// RT1-CE1 /// RT1-CE2 /// RT1-CE15               | 1.849  | 0.124 | 1.849  | 0.010 | 2.021   | 0.037 | 1.577   | 0.056 |
| 1370428_x_at | AJ249701  | RT1 class Ib, locus Aw2 /// RT1 class Ia, locus A2 /// RT1 class I, A3                                                                                   | RT1-Aw2 /// RT1-A2 /// RT1-A3                                           | 5.062  | 0.000 | 6.736  | 0.002 | 6.395   | 0.001 | 8.298   | 0.001 |
| 1387205_at   | NM_022921 | RT1 class Ib, locus M3                                                                                                                                   | RT1-M3                                                                  | 6.082  | 0.004 | 6.846  | 0.000 | 11.496  | 0.000 | 10.822  | 0.003 |
| 1388212_a_at | AJ243974  | RT1 class Ib, locus S3                                                                                                                                   | RT1-S3                                                                  | 25.695 | 0.000 | 34.998 | 0.000 | 54.931  | 0.000 | 62.584  | 0.000 |
| 1388164_at   | AF029241  | RT1 class Ib, locus S3                                                                                                                                   | RT1-S3                                                                  | 47.084 | 0.003 | 36.960 | 0.000 | 79.404  | 0.000 | 96.716  | 0.001 |
| 1371123_x_at | AJ243973  | RT1 class Ib, locus S3                                                                                                                                   | RT1-S3                                                                  | 28.968 | 0.009 | 49.820 | 0.000 | 51.747  | 0.000 | 107.001 | 0.000 |
| 1388213_a_at | AJ243973  | RT1 class Ib, locus S3                                                                                                                                   | RT1-S3                                                                  | 65.124 | 0.012 | 78.726 | 0.000 | 126.888 | 0.000 | 174.671 | 0.000 |
| 1377334_at   | BG378249  | RT1 class II, locus Ba                                                                                                                                   | RT1-Ba                                                                  | 1.345  | 0.008 | 2.760  | 0.029 | 3.438   | 0.034 | 15.930  | 0.039 |
| 1370822_at   | AF307302  | RT1 class II, locus Ba                                                                                                                                   | RT1-Ba                                                                  | 1.046  | 0.896 | 5.563  | 0.067 | 1.022   | 0.906 | 73.020  | 0.003 |
| 1371033_at   | AI715202  | RT1 class II, locus Bb                                                                                                                                   | RT1-Bb                                                                  | 0.909  | 0.788 | 3.316  | 0.023 | 1.172   | 0.249 | 12.441  | 0.001 |
| 1370883_at   | Y00480    | RT1 class II, locus Da                                                                                                                                   | RT1-Da                                                                  | 2.328  | 0.112 | 10.003 | 0.004 | 6.397   | 0.006 | 77.562  | 0.004 |
| 1370383_s_at | BI279526  | RT1 class II, locus Db1                                                                                                                                  | RT1-Db1                                                                 | 1.031  | 0.197 | 4.312  | 0.048 | 1.123   | 0.642 | 23.180  | 0.007 |
| 1370382_at   | BI279526  | RT1 class II, locus Db1                                                                                                                                  | RT1-Db1                                                                 | 1.201  | 0.505 | 1.291  | 0.373 | 1.031   | 0.926 | 8.248   | 0.038 |
| 1389734_x_at | BI282965  | RT1-149 protein                                                                                                                                          | RT1-149                                                                 | 2.898  | 0.449 | 8.405  | 0.119 | 7.759   | 0.128 | 10.138  | 0.076 |
| 1374050_at   | BE100918  | RUN and FYVE domain containing 1                                                                                                                         | Rufy1                                                                   | 1.226  | 0.080 | 2.180  | 0.025 | 1.200   | 0.092 | 1.233   | 0.171 |
| 1381841_at   | BF411958  | RUN and FYVE domain containing 1                                                                                                                         | Rufy1                                                                   | 1.015  | 0.992 | 1.409  | 0.087 | 0.799   | 0.439 | 0.912   | 0.897 |
| 1373687_at   | BI284968  | RUN and TBC1 domain containing 3                                                                                                                         | Rutbc3                                                                  | 0.937  | 0.435 | 1.241  | 0.837 | 0.631   | 0.061 | 1.027   | 0.851 |
| 1398114_at   | BF564763  | Runt related transcription factor 1                                                                                                                      | Runx1                                                                   | 1.044  | 0.173 | 1.004  | 0.899 | 0.741   | 0.289 | 0.881   | 0.078 |
| 1396592_at   | BF405096  | Runt related transcription factor 2                                                                                                                      | Runx2                                                                   | 1.265  | 0.997 | 1.694  | 0.133 | 1.238   | 0.795 | 0.755   | 0.089 |
| 1373280_at   | AA848324  | RuvB-like 2 (E. coli)                                                                                                                                    | Ruvbl2                                                                  | 0.714  | 0.325 | 3.041  | 0.025 | 0.903   | 0.212 | 2.506   | 0.037 |
| 1375715_at   | BE112777  | RWD domain containing 1                                                                                                                                  | Rwdd1                                                                   | 0.969  | 0.236 | 0.631  | 0.320 | 0.908   | 0.676 | 1.399   | 0.167 |
| 1388192_at   | AI711028  | RWD domain containing 3                                                                                                                                  | Rwdd3                                                                   | 1.179  | 0.345 | 0.880  | 0.355 | 1.239   | 0.308 | 0.904   | 0.230 |
| 1392170_at   | BE121336  | RWD domain containing 3                                                                                                                                  | Rwdd3                                                                   | 1.050  | 0.987 | 1.010  | 0.945 | 1.007   | 0.985 | 0.783   | 0.595 |
| 1376879_at   | AI716916  | RWD domain containing 4A                                                                                                                                 | Rwdd4a                                                                  | 0.464  | 0.016 | 1.132  | 0.958 | 0.510   | 0.267 | 1.061   | 0.832 |
| 1389480_at   | AI598462  | RWD domain containing 4A                                                                                                                                 | Rwdd4a                                                                  | 0.481  | 0.052 | 0.448  | 0.001 | 0.623   | 0.120 | 0.395   | 0.003 |
| 1382088_at   | AI548753  | Ryanodine receptor 2, cardiac                                                                                                                            | Ryr2                                                                    | 5.948  | 0.024 | 0.364  | 0.146 | 13.046  | 0.003 | 0.537   | 0.059 |
| 1386890_at   | NM_031114 | S100 calcium binding protein A10 (calpactin)                                                                                                             | S100a10                                                                 | 3.076  | 0.005 | 2.705  | 0.006 | 3.876   | 0.006 | 1.996   | 0.011 |
| 1375170_at   | BG378926  | S100 calcium binding protein A11 (calizzarin)                                                                                                            | S100a11                                                                 | 6.108  | 0.004 | 16.799 | 0.000 | 3.893   | 0.124 | 9.324   | 0.000 |
| 1367661_at   | AF140232  | S100 calcium binding protein A6 (calcyclin)                                                                                                              | S100a6                                                                  | 13.129 | 0.055 | 7.371  | 0.001 | 1.920   | 0.195 | 2.581   | 0.002 |
| 1381252_at   | BE098160  | SA rat hypertension-associated gene                                                                                                                      | Sah                                                                     | 0.900  | 0.246 | 0.334  | 0.017 | 0.570   | 0.133 | 0.322   | 0.038 |
| 1394458_at   | BF291026  | SA rat hypertension-associated gene                                                                                                                      | Sah                                                                     | 0.757  | 0.501 | 0.971  | 0.590 | 0.625   | 0.313 | 0.844   | 0.272 |
| 1383303_at   | BI282211  | SA rat hypertension-associated gene                                                                                                                      | Sah                                                                     | 1.024  | 0.663 | 0.231  | 0.001 | 1.309   | 0.069 | 0.277   | 0.000 |
| 1368433_at   | NM_053798 | SAC1 (suppressor of actin mutations 1, homolog)-like (S. cerevisiae)                                                                                     | Sacm11                                                                  | 0.725  | 0.105 | 0.927  | 0.037 | 0.826   | 0.121 | 0.831   | 0.043 |
| 1372741_at   | AI412013  | saccharopine dehydrogenase (putative)                                                                                                                    | Sccpdh                                                                  | 0.506  | 0.012 | 0.519  | 0.000 | 0.404   | 0.001 | 0.473   | 0.007 |
| 1367798_at   | NM_017201 | S-adenosylhomocysteine hydrolase                                                                                                                         | Ahcy                                                                    | 0.532  | 0.049 | 1.516  | 0.026 | 0.530   | 0.013 | 0.938   | 0.576 |
| 1395273_at   | BE115782  | S-adenosylhomocysteine hydrolase-like 1 (predicted)                                                                                                      | Ahcy11_predicted                                                        | 0.972  | 0.830 | 1.513  | 0.099 | 0.978   | 0.950 | 1.022   | 0.474 |
| 1367933_at   | NM_031011 | S-adenosylmethionine decarboxylase 1                                                                                                                     | Amd1                                                                    | 0.518  | 0.000 | 0.482  | 0.001 | 0.502   | 0.011 | 0.630   | 0.012 |
| 1373284_at   | AI176607  | salvador homolog 1 (Drosophila) (predicted)                                                                                                              | Sav1_predicted                                                          | 1.152  | 0.230 | 1.692  | 0.001 | 1.316   | 0.048 | 1.898   | 0.021 |
| 1393453_at   | BI290287  | salvador homolog 1 (Drosophila) (predicted)                                                                                                              | Sav1_predicted                                                          | 1.038  | 0.761 | 1.275  | 0.128 | 1.047   | 0.442 | 1.027   | 0.055 |
| 1373973_at   | AI169082  | SAP30 binding protein (predicted)                                                                                                                        | Sap30bp_predicted                                                       | 0.942  | 0.834 | 1.362  | 0.230 | 0.897   | 0.808 | 1.118   | 0.417 |
| 1388815_at   | BE329438  | SAPS domain family, member 1 (predicted)                                                                                                                 | Saps1_predicted                                                         | 1.825  | 0.186 | 1.620  | 0.007 | 2.393   | 0.004 | 2.248   | 0.000 |
| 1385758_at   | BF399333  | SAPS domain family, member 1 (predicted)                                                                                                                 | Saps1_predicted                                                         | 0.930  | 0.996 | 1.108  | 0.228 | 0.981   | 0.819 | 1.442   | 0.014 |
| 1375037_at   | AI176244  | SAPS domain family, member 3 (predicted)                                                                                                                 | Saps3_predicted                                                         | 0.834  | 0.429 | 0.607  | 0.008 | 1.068   | 0.977 | 0.577   | 0.026 |
| 1367470_at   | AA851321  | SAR1 gene homolog A (S. cerevisiae)                                                                                                                      | Sar1a                                                                   | 0.585  | 0.236 | 0.598  | 0.001 | 0.587   | 0.017 | 0.482   | 0.001 |
| 1398353_at   | AI236260  | SAR1 gene homolog A (S. cerevisiae)                                                                                                                      | Sar1a                                                                   | 0.883  | 0.572 | 3.204  | 0.003 | 0.815   | 0.004 | 2.329   | 0.003 |
| 1388681_at   | AI105294  | SAR1 gene homolog B (S. cerevisiae)                                                                                                                      | Sar1b                                                                   | 1.655  | 0.022 | 1.043  | 0.545 | 1.718   | 0.028 | 1.134   | 0.169 |
| 1368058_at   | NM_022394 | scaffold attachment factor B                                                                                                                             | Safb                                                                    | 0.971  | 0.863 | 0.940  | 0.808 | 0.806   | 0.486 | 0.889   | 0.642 |
| 1386956_at   | NM_031541 | scavenger receptor class B, member 1                                                                                                                     | Scarb1                                                                  | 1.980  | 0.043 | 1.447  | 0.218 | 2.398   | 0.065 | 1.695   | 0.038 |
| 1368379_at   | NM_054001 | scavenger receptor class B, member 2                                                                                                                     | Scarb2                                                                  | 0.612  | 0.522 | 2.205  | 0.023 | 0.554   | 0.056 | 2.118   | 0.018 |
| 1372250_at   | BI294932  | SCF apoptosis response protein 1                                                                                                                         | LOC499941                                                               | 1.003  | 0.168 | 1.374  | 0.298 | 0.813   | 0.505 | 1.051   | 0.540 |

|            |           |                                                                                                           |                      |        |       |        |       |        |       |        |       |
|------------|-----------|-----------------------------------------------------------------------------------------------------------|----------------------|--------|-------|--------|-------|--------|-------|--------|-------|
| 1377916_at | AW915529  | schlafen 2 (predicted)                                                                                    | Slfn2_predicted      | 2.213  | 0.050 | 1.032  | 0.799 | 1.333  | 0.233 | 0.800  | 0.227 |
| 1392842_at | AI072951  | Schlafen 5 (predicted)                                                                                    | Slfn5_predicted      | 1.398  | 0.351 | 0.999  | 0.649 | 0.969  | 0.164 | 1.005  | 0.291 |
| 1379957_at | BE107457  | schlafen 8                                                                                                | Slfn8                | 22.595 | 0.000 | 10.398 | 0.000 | 33.708 | 0.000 | 23.785 | 0.001 |
| 1389367_at | AI409747  | schwannomin interacting protein 1                                                                         | Slnp1                | 1.024  | 0.140 | 0.517  | 0.017 | 0.763  | 0.139 | 0.752  | 0.018 |
| 1379281_at | AA892798  | sclerostin domain containing 1                                                                            | Sostdc1              | 1.001  | 0.992 | 1.532  | 0.135 | 1.436  | 0.185 | 0.989  | 0.917 |
| 1390685_at | BF395810  | Scm-like with four mbt domains 1                                                                          | Sfmbt1               | 1.599  | 0.005 | 0.821  | 0.774 | 3.169  | 0.002 | 3.637  | 0.024 |
| 1368129_at | NM_031647 | Scm-like with four mbt domains 1                                                                          | Sfmbt1               | 8.842  | 0.014 | 6.803  | 0.003 | 8.567  | 0.017 | 6.984  | 0.001 |
| 1388776_at | AI169176  | scotin                                                                                                    | MGC94600             | 1.386  | 0.170 | 1.142  | 0.050 | 2.725  | 0.006 | 1.490  | 0.011 |
| 1368978_at | NM_033499 | scrapie responsive gene 1                                                                                 | Scrg1                | 0.999  | 0.995 | 0.974  | 0.783 | 1.002  | 0.987 | 0.974  | 0.772 |
| 1399024_at | AI180441  | SCY1-like 1 (S. cerevisiae)                                                                               | Scyl1                | 0.767  | 0.198 | 1.083  | 0.971 | 0.899  | 0.285 | 0.939  | 0.035 |
| 1382635_at | BF289119  | SCY1-like 1 (S. cerevisiae)                                                                               | Scyl1                | 1.206  | 0.684 | 0.997  | 0.197 | 0.494  | 0.153 | 0.745  | 0.224 |
| 1382921_at | AA997613  | SDA1 domain containing 1                                                                                  | Sdad1                | 0.679  | 0.100 | 5.125  | 0.001 | 0.611  | 0.163 | 3.452  | 0.019 |
| 1390704_at | BF394953  | SDA1 domain containing 1                                                                                  | Sdad1                | 0.978  | 0.198 | 1.019  | 0.816 | 0.858  | 0.283 | 1.119  | 0.673 |
| 1368158_at | NM_019364 | sec1 family domain containing 1                                                                           | Scfd1                | 0.802  | 0.524 | 1.041  | 0.436 | 0.942  | 0.221 | 0.957  | 0.226 |
| 1369991_at | NM_031723 | Sec11-like 1 (S. cerevisiae)                                                                              | Sec1111              | 0.987  | 0.993 | 1.423  | 0.028 | 1.017  | 0.936 | 1.444  | 0.014 |
| 1370817_at | AB022714  | Sec11-like 3 (S. cerevisiae)                                                                              | Sec1113              | 0.993  | 0.978 | 0.934  | 0.057 | 0.960  | 0.326 | 0.966  | 0.441 |
| 1371437_at | BM986228  | SEC13-like 1 (S. cerevisiae)                                                                              | Sec1311              | 0.703  | 0.284 | 0.949  | 0.017 | 0.704  | 0.084 | 0.929  | 0.070 |
| 1369092_at | NM_057147 | sec22 homolog                                                                                             | Sec2212              | 0.708  | 0.112 | 1.661  | 0.018 | 0.836  | 0.946 | 1.500  | 0.047 |
| 1377691_at | AI599376  | SEC22 vesicle trafficking protein-like 1 (S. cerevisiae)                                                  | Sec2211              | 0.815  | 0.885 | 1.960  | 0.197 | 0.705  | 0.058 | 1.250  | 0.119 |
| 1380163_at | BI302685  | SEC23 interacting protein                                                                                 | Sec23ip              | 1.158  | 0.538 | 0.714  | 0.053 | 0.919  | 0.327 | 0.866  | 0.039 |
| 1388755_at | AI179139  | SEC23A (S. cerevisiae) (predicted)                                                                        | Sec23a_predicted     | 0.562  | 0.132 | 0.942  | 0.554 | 0.747  | 0.029 | 1.168  | 0.352 |
| 1388857_at | BF289044  | SEC23B (S. cerevisiae) (predicted)                                                                        | Sec23b_predicted     | 0.700  | 0.520 | 1.144  | 0.940 | 0.775  | 0.187 | 1.161  | 0.094 |
| 1392211_at | BF408070  | SEC24 related gene family, member B (S. cerevisiae) (predicted)                                           | Sec24b_predicted     | 0.862  | 0.334 | 0.901  | 0.573 | 0.917  | 0.627 | 0.891  | 0.205 |
| 1389455_at | BG380421  | SEC24 related gene family, member B (S. cerevisiae) (predicted)                                           | Sec24b_predicted     | 1.003  | 0.969 | 1.004  | 0.116 | 0.951  | 0.988 | 0.969  | 0.776 |
| 1367753_at | NM_033021 | SEC31-like 1 (S. cerevisiae)                                                                              | Sec3111              | 0.887  | 0.574 | 1.071  | 0.709 | 1.426  | 0.062 | 1.094  | 0.529 |
| 1375749_at | BF404853  | SEC3-like 1 (S. cerevisiae)                                                                               | Sec311               | 1.087  | 0.757 | 1.007  | 0.952 | 0.997  | 0.233 | 0.993  | 0.960 |
| 1371368_at | BI279499  | Sec61 alpha 1 subunit (S. cerevisiae)                                                                     | Sec61a1              | 0.495  | 0.328 | 0.649  | 0.011 | 0.771  | 0.099 | 0.673  | 0.030 |
| 1382615_at | BI284366  | Sec61 alpha 1 subunit (S. cerevisiae)                                                                     | Sec61a1              | 0.765  | 0.619 | 0.753  | 0.217 | 0.968  | 0.293 | 0.541  | 0.002 |
| 1388519_at | BI281906  | Sec61 beta subunit (predicted)                                                                            | Sec61b_predicted     | 0.814  | 0.541 | 0.935  | 0.215 | 0.761  | 0.160 | 0.782  | 0.138 |
| 1375659_at | BG381529  | Sec61, alpha subunit 2 (S. cerevisiae) (predicted)                                                        | Sec61a2_predicted    | 0.768  | 0.022 | 0.711  | 0.004 | 0.838  | 0.003 | 0.813  | 0.025 |
| 1384519_at | BG377412  | SEC63-like (S. cerevisiae) (predicted)                                                                    | Sec63_predicted      | 0.547  | 0.036 | 0.859  | 0.573 | 0.704  | 0.018 | 1.087  | 0.631 |
| 1397964_at | AI406662  | SEC63-like (S. cerevisiae) (predicted)                                                                    | Sec63_predicted      | 0.459  | 0.143 | 0.912  | 0.454 | 0.484  | 0.160 | 0.338  | 0.079 |
| 1374917_at | AI548571  | SEC63-like (S. cerevisiae) (predicted)                                                                    | Sec63_predicted      | 0.598  | 0.259 | 0.482  | 0.015 | 0.860  | 0.511 | 0.686  | 0.018 |
| 1390501_at | BE101157  | Secernin 3                                                                                                | Scrn3                | 0.717  | 0.584 | 0.699  | 0.018 | 0.366  | 0.058 | 0.764  | 0.034 |
| 1382644_at | AA875527  | Secernin 3                                                                                                | Scrn3                | 0.750  | 0.772 | 0.707  | 0.018 | 1.123  | 0.960 | 0.765  | 0.047 |
| 1368094_at | NM_024002 | SECIS binding protein 2                                                                                   | Secisbp2             | 1.364  | 0.371 | 1.724  | 0.012 | 1.124  | 0.595 | 1.625  | 0.001 |
| 1368044_at | NM_022669 | secretogranin 2                                                                                           | Scg2                 | 0.796  | 0.622 | 0.455  | 0.001 | 0.856  | 0.452 | 0.524  | 0.004 |
| 1368656_at | NM_053856 | secretogranin III                                                                                         | Scg3                 | 0.944  | 0.211 | 0.695  | 0.002 | 0.869  | 0.061 | 0.710  | 0.010 |
| 1396375_at | BF417934  | Secretogranin III                                                                                         | Scg3                 | 1.921  | 0.424 | 0.925  | 0.847 | 1.574  | 0.508 | 0.996  | 0.992 |
| 1370978_at | BM387205  | secretory carrier membrane protein 1                                                                      | Scamp1               | 2.546  | 0.035 | 1.465  | 0.008 | 1.368  | 0.110 | 1.201  | 0.029 |
| 1388819_at | BM386698  | secretory carrier membrane protein 1                                                                      | Scamp1               | 2.334  | 0.035 | 0.565  | 0.003 | 1.271  | 0.157 | 0.670  | 0.007 |
| 1371769_at | BI279666  | secretory carrier membrane protein 2                                                                      | Scamp2               | 0.879  | 0.603 | 0.798  | 0.214 | 0.634  | 0.716 | 0.634  | 0.005 |
| 1371090_at | BM387006  | secretory carrier membrane protein 2                                                                      | Scamp2               | 1.091  | 0.729 | 0.947  | 0.264 | 0.936  | 0.980 | 0.750  | 0.031 |
| 1370921_at | BI281156  | secretory carrier membrane protein 3                                                                      | Scamp3               | 0.557  | 0.542 | 0.868  | 0.280 | 0.596  | 0.030 | 0.616  | 0.075 |
| 1367688_at | NM_031725 | secretory carrier membrane protein 4                                                                      | Scamp4               | 0.656  | 0.171 | 1.277  | 0.014 | 1.003  | 0.227 | 1.373  | 0.052 |
| 1367992_at | NM_013175 | secretory granule neuroendocrine protein 1                                                                | Sgne1                | 0.847  | 0.681 | 0.563  | 0.000 | 0.878  | 0.248 | 0.581  | 0.010 |
|            |           |                                                                                                           | Slpi ///             |        |       |        |       |        |       |        |       |
| 1367998_at | NM_053372 | secretory leukocyte peptidase inhibitor /// similar to secretory leukocyte protease inhibitor (predicted) | RGD1563818_predicted | 1.128  | 0.122 | 1.232  | 0.662 | 1.064  | 0.809 | 1.036  | 0.397 |
| 1374825_at | BG380338  | seizure related 6 homolog (mouse)-like 2 (predicted)                                                      | Sez6l2_predicted     | 0.700  | 0.011 | 0.397  | 0.004 | 0.748  | 0.169 | 0.535  | 0.029 |
| 1376073_at | BI285936  | Sel1 (suppressor of lin-12) 1 homolog (C. elegans)                                                        | Sel1h                | 0.793  | 0.755 | 3.065  | 0.001 | 0.846  | 0.319 | 2.473  | 0.000 |
| 1382935_at | BE113823  | SEL1 domain containing protein RGD735029                                                                  | RGD735029            | 0.659  | 0.110 | 1.742  | 0.041 | 0.822  | 0.288 | 1.933  | 0.030 |
| 1381174_at | BG381120  | SEL1 domain containing protein RGD735029                                                                  | RGD735029            | 0.901  | 0.637 | 2.663  | 0.008 | 0.548  | 0.154 | 2.347  | 0.001 |
| 1387046_at | NM_053792 | selective LIM binding factor, rat homolog                                                                 | Slb                  | 0.715  | 0.062 | 0.491  | 0.001 | 0.752  | 0.260 | 0.460  | 0.000 |
| 1374524_at | BM384384  | selenocysteine lyase                                                                                      | Scly                 | 4.520  | 0.007 | 4.270  | 0.009 | 7.567  | 0.000 | 6.375  | 0.001 |
| 1393256_at | AI137711  | selenophosphate synthetase 1                                                                              | Sephs1               | 0.448  | 0.018 | 0.644  | 0.171 | 0.637  | 0.112 | 0.630  | 0.004 |
| 1381650_at | BM389433  | Selenophosphate synthetase 1                                                                              | Sephs1               | 0.734  | 0.091 | 0.931  | 0.761 | 0.766  | 0.759 | 0.755  | 0.454 |
| 1389215_at | AI407424  | selenophosphate synthetase 1                                                                              | Sephs1               | 0.833  | 0.380 | 1.228  | 0.762 | 1.311  | 0.989 | 1.451  | 0.243 |
| 1372876_at | AA799700  | selenophosphate synthetase 2                                                                              | Sephs2               | 0.674  | 0.172 | 0.785  | 0.225 | 0.472  | 0.067 | 0.911  | 0.201 |
| 1398752_at | NM_133297 | selenoprotein                                                                                             |                      | 42248  | 0.727 | 0.958  | 0.615 | 0.024  | 0.778 | 0.843  | 0.006 |
| 1368806_at | AA799627  | selenoprotein P, plasma, 1                                                                                | Sepp1                | 0.472  | 0.012 | 0.132  | 0.001 | 0.519  | 0.002 | 0.222  | 0.006 |
| 1367593_at | NM_013027 | selenoprotein W, muscle 1                                                                                 | Sepw1                | 1.550  | 0.027 | 1.544  | 0.165 | 3.212  | 0.001 | 1.880  | 0.011 |

|              |           |                                                                                                                              |                          |        |       |        |       |        |       |        |       |
|--------------|-----------|------------------------------------------------------------------------------------------------------------------------------|--------------------------|--------|-------|--------|-------|--------|-------|--------|-------|
| 1388745_at   | AI228417  | sema domain, immunoglobulin domain (Ig), transmembrane domain (TM) and short cytoplasmic domain, (semaphorin) 4A             | Sema4a                   | 20.562 | 0.006 | 4.867  | 0.001 | 7.947  | 0.002 | 2.129  | 0.015 |
| 1395864_at   | AA945715  | Sema domain, immunoglobulin domain (Ig), transmembrane domain (TM) and short cytoplasmic domain, (semaphorin) 4A             | Sema4a                   | 6.871  | 0.034 | 1.013  | 0.944 | 3.588  | 0.062 | 1.272  | 0.896 |
| 1374678_at   | BE109578  | Sema domain, immunoglobulin domain (Ig), transmembrane domain (TM) and short cytoplasmic domain, (semaphorin) 4B             | Sema4b                   | 6.191  | 0.024 | 1.612  | 0.055 | 6.155  | 0.018 | 1.533  | 0.068 |
| 1380248_at   | AA819138  | sema domain, immunoglobulin domain (Ig), transmembrane domain (TM) and short cytoplasmic domain, (semaphorin) 4G (predicted) | Sema4g_predicted         | 0.997  | 0.963 | 0.574  | 0.203 | 1.004  | 0.979 | 0.582  | 0.204 |
| 1392795_at   | AA963069  | Sema domain, transmembrane domain (TM), and cytoplasmic domain, (semaphorin) 6A (predicted)                                  | Sema6a_predicted         | 1.622  | 0.457 | 0.765  | 0.154 | 1.604  | 0.097 | 0.741  | 0.104 |
| 1387322_at   | NM_053471 | sema domain, transmembrane domain (TM), and cytoplasmic domain, (semaphorin) 6B                                              | Sema6b                   | 1.221  | 0.477 | 0.332  | 0.047 | 1.119  | 0.622 | 0.432  | 0.045 |
| 1368984_at   | NM_057148 | septin 2                                                                                                                     |                          | 37500  | 1.821 | 0.156  | 9.086 | 0.022  | 0.985 | 0.801  | 1.690 |
| 1388389_at   | BF282620  | septin 2                                                                                                                     |                          | 37500  | 1.017 | 0.909  | 0.738 | 0.038  | 0.971 | 0.347  | 0.752 |
| 1396135_at   | BF567887  | Septin 4                                                                                                                     |                          | 38231  | 1.017 | 0.894  | 0.879 | 0.194  | 1.158 | 0.514  | 0.751 |
| 1386955_at   | BM387903  | septin 5                                                                                                                     |                          | 38596  | 1.318 | 0.284  | 2.001 | 0.052  | 1.058 | 0.859  | 1.204 |
| 1396145_at   | AW142500  | Septin 6 (predicted)                                                                                                         | Sept6_predicted          | 0.759  | 0.014 | 1.274  | 0.743 | 0.759  | 0.326 | 1.324  | 0.220 |
| 1372949_at   | BG663067  | Septin 6 (predicted)                                                                                                         | Sept6_predicted          | 0.786  | 0.557 | 1.840  | 0.026 | 0.650  | 0.115 | 1.623  | 0.060 |
| 1387436_at   | NM_022616 | septin 7                                                                                                                     |                          | 39326  | 1.419 | 0.943  | 1.656 | 0.317  | 1.005 | 0.949  | 0.951 |
| 1386296_at   | AI639205  | septin 8 (predicted)                                                                                                         | Sept8_predicted          | 0.942  | 0.206 | 0.520  | 0.039 | 1.214  | 0.405 | 0.601  | 0.022 |
| 1386906_a_at | AF180526  | septin 9                                                                                                                     |                          | 40057  | 0.748 | 0.672  | 0.763 | 0.819  | 0.481 | 0.268  | 0.807 |
| 1367698_a_at | NM_031837 | septin 9                                                                                                                     |                          | 40057  | 0.791 | 0.741  | 1.262 | 0.089  | 0.632 | 0.113  | 1.165 |
| 1375374_at   | BF400606  | Sequestosome 1                                                                                                               | Sqstm1                   | 2.402  | 0.001 | 2.383  | 0.006 | 1.815  | 0.009 | 2.484  | 0.001 |
| 1389381_at   | AI411586  | sequestosome 1                                                                                                               | Sqstm1                   | 6.956  | 0.007 | 23.579 | 0.000 | 2.040  | 0.151 | 12.735 | 0.001 |
| 1371353_at   | BG663093  | sequestosome 1                                                                                                               | Sqstm1                   | 1.140  | 0.288 | 3.071  | 0.000 | 0.852  | 0.143 | 3.202  | 0.002 |
| 1371943_at   | BF420075  | Ser/Thr-like protein kinase lyk4 /// serine/threonine kinase 40 (predicted)                                                  | Lyk4 /// Stk40_predicted | 1.396  | 0.138 | 1.430  | 0.021 | 1.966  | 0.000 | 1.840  | 0.003 |
| 1368790_at   | NM_133617 | serine (or cysteine) peptidase inhibitor, clade A (alpha-1 antiproteinase, antitrypsin), member 10                           | Serpina10                | 1.722  | 0.064 | 0.596  | 0.009 | 5.012  | 0.005 | 0.712  | 0.500 |
| 1368224_at   | NM_031531 | serine (or cysteine) peptidase inhibitor, clade A, member 3N                                                                 | Serpina3n                | 3.296  | 0.001 | 2.642  | 0.032 | 3.674  | 0.006 | 1.000  | 0.075 |
| 1369972_at   | NM_057108 | serine (or cysteine) peptidase inhibitor, clade B, member 5                                                                  | Serpib5                  | 0.491  | 0.042 | 0.490  | 0.036 | 0.419  | 0.021 | 0.543  | 0.106 |
| 1375003_at   | AA997359  | serine (or cysteine) peptidase inhibitor, clade B, member 6a                                                                 | Serpib6a                 | 1.150  | 0.665 | 1.021  | 0.530 | 0.806  | 0.825 | 0.908  | 0.558 |
| 1376918_at   | AI029930  | Serine (or cysteine) peptidase inhibitor, clade C (antithrombin), member 1                                                   | Serpinc1                 | 1.691  | 0.314 | 0.600  | 0.137 | 0.982  | 0.567 | 0.587  | 0.119 |
| 1388569_at   | AI179984  | serine (or cysteine) peptidase inhibitor, clade F, member 1                                                                  | Serpinf1                 | 0.868  | 0.040 | 1.000  | 0.999 | 0.878  | 0.045 | 0.999  | 0.998 |
| 1372254_at   | AW915763  | serine (or cysteine) peptidase inhibitor, clade G, member 1                                                                  | Serping1                 | 19.176 | 0.002 | 16.403 | 0.000 | 24.445 | 0.001 | 19.680 | 0.001 |
| 1368256_at   | NM_053779 | serine (or cysteine) peptidase inhibitor, clade I, member 1                                                                  | Serpini1                 | 0.691  | 0.131 | 0.186  | 0.000 | 1.197  | 0.662 | 0.423  | 0.020 |
| 1387131_at   | AF193015  | serine (or cysteine) peptidase inhibitor, clade I, member 1                                                                  | Serpini1                 | 0.882  | 0.799 | 0.385  | 0.014 | 0.979  | 0.912 | 0.600  | 0.005 |
| 1391850_at   | BE116159  | Serine (or cysteine) peptidase inhibitor, clade I, member 1                                                                  | Serpini1                 | 0.875  | 0.800 | 0.821  | 0.619 | 1.210  | 0.081 | 0.863  | 0.221 |
| 1369748_at   | NM_133612 | serine (or cysteine) peptidase inhibitor, clade I, member 2                                                                  | Serpini2                 | 1.023  | 0.230 | 0.969  | 0.163 | 1.026  | 0.674 | 0.962  | 0.692 |
| 1367647_at   | NM_022519 | serine (or cysteine) proteinase inhibitor, clade A (alpha-1 antiproteinase, antitrypsin), member 1                           | Serpina1                 | 1.271  | 0.037 | 0.418  | 0.149 | 1.048  | 0.845 | 0.466  | 0.150 |
| 1373686_at   | AA893495  | serine (or cysteine) proteinase inhibitor, clade A (alpha-1 antiproteinase, antitrypsin), member 6 (mapped)                  | Serpina6_mapped          | 0.772  | 0.310 | 4.393  | 0.017 | 0.996  | 0.991 | 2.141  | 0.032 |
| 1377034_at   | BF411331  | serine (or cysteine) proteinase inhibitor, clade B, member 1a                                                                | Serpib1a                 | 0.909  | 0.241 | 0.571  | 0.080 | 0.910  | 0.830 | 0.596  | 0.079 |
| 1380346_at   | BE100150  | serine (or cysteine) proteinase inhibitor, clade B, member 1a                                                                | Serpib1a                 | 1.311  | 0.481 | 1.107  | 0.443 | 0.740  | 0.746 | 0.985  | 0.912 |
| 1372440_at   | BI275818  | serine (or cysteine) proteinase inhibitor, clade E, member 2                                                                 | Serpine2                 | 1.407  | 0.240 | 0.951  | 0.188 | 1.177  | 0.099 | 0.953  | 0.018 |
| 1370220_at   | BI283159  | serine carboxypeptidase 1                                                                                                    | Scpep1                   | 0.902  | 0.940 | 1.176  | 0.712 | 0.845  | 0.027 | 1.045  | 0.116 |
| 1385670_at   | BF521655  | serine dehydratase-like (predicted)                                                                                          | Sdsl_predicted           | 0.958  | 0.324 | 0.840  | 0.090 | 0.857  | 0.416 | 0.755  | 0.342 |
| 1374748_at   | AI010087  | serine hydroxymethyl transferase 1 (soluble)                                                                                 | Shmt1                    | 1.009  | 0.871 | 0.986  | 0.984 | 0.988  | 0.996 | 1.014  | 0.618 |
| 1388695_at   | BF285150  | serine hydroxymethyl transferase 2 (mitochondrial)                                                                           | Shmt2                    | 1.104  | 0.220 | 1.671  | 0.085 | 1.109  | 0.256 | 1.555  | 0.169 |
| 1388307_at   | BG671458  | serine incorporator 1                                                                                                        | Serinc1                  | 0.825  | 0.851 | 0.746  | 0.029 | 0.919  | 0.363 | 0.808  | 0.057 |
| 1375084_at   | BF419780  | serine incorporator 2                                                                                                        | Serinc2                  | 1.545  | 0.057 | 0.863  | 0.393 | 1.164  | 0.088 | 1.261  | 0.583 |
| 1398986_at   | AA944455  | serine incorporator 3                                                                                                        | Serinc3                  | 1.308  | 0.318 | 0.947  | 0.765 | 1.184  | 0.104 | 0.845  | 0.088 |
| 1397197_at   | BE120228  | Serine incorporator 3                                                                                                        | Serinc3                  | 1.144  | 0.809 | 0.862  | 0.266 | 3.080  | 0.021 | 0.868  | 0.130 |
| 1373203_at   | AI236953  | serine palmitoyltransferase, long chain base subunit 1 (predicted)                                                           | Sptlc1_predicted         | 0.755  | 0.002 | 0.738  | 0.011 | 0.818  | 0.052 | 0.807  | 0.027 |
| 1383290_at   | BI280343  | serine peptidase inhibitor, Kunitz type 1                                                                                    | Spint1                   | 2.199  | 0.001 | 2.845  | 0.003 | 2.461  | 0.000 | 2.603  | 0.005 |
| 1388320_at   | AI412117  | serine protease inhibitor, Kunitz type 2                                                                                     | Spint2                   | 0.878  | 0.240 | 0.734  | 0.001 | 0.993  | 0.900 | 0.853  | 0.025 |
| 1390131_at   | BE112936  | serine racemase                                                                                                              | Srr                      | 0.947  | 0.929 | 0.689  | 0.037 | 1.466  | 0.463 | 0.900  | 0.873 |
| 1377914_at   | AI059437  | serine/arginine repetitive matrix 1 (predicted)                                                                              | Srrm1_predicted          | 2.009  | 0.017 | 2.374  | 0.011 | 1.409  | 0.093 | 1.476  | 0.643 |
| 1371425_at   | BF396399  | Serine/arginine repetitive matrix 1 (predicted)                                                                              | Srrm1_predicted          | 1.291  | 0.028 | 1.402  | 0.001 | 1.203  | 0.497 | 1.369  | 0.005 |
| 1390048_at   | BF408990  | serine/arginine repetitive matrix 2 (predicted)                                                                              | Srrm2_predicted          | 0.549  | 0.030 | 0.617  | 0.015 | 0.777  | 0.562 | 0.790  | 0.366 |
| 1398940_at   | AW532525  | serine/arginine repetitive matrix 2 (predicted)                                                                              | Srrm2_predicted          | 0.791  | 0.114 | 0.572  | 0.021 | 1.077  | 0.311 | 0.717  | 0.007 |
| 1371714_at   | BG378760  | Serine/arginine-rich protein specific kinase 1                                                                               | Srpki1                   | 0.830  | 0.757 | 0.407  | 0.003 | 0.606  | 0.079 | 0.485  | 0.010 |
| 1383182_at   | AW144184  | serine/arginine-rich protein specific kinase 1                                                                               | Srpki1                   | 1.132  | 0.819 | 1.930  | 0.030 | 0.871  | 0.084 | 2.770  | 0.042 |
| 1375459_at   | BE113419  | serine/arginine-rich protein specific kinase 2 (predicted)                                                                   | Srpki2_predicted         | 0.542  | 0.168 | 1.049  | 0.219 | 0.604  | 0.170 | 1.083  | 0.706 |
| 1370920_at   | AI102055  | serine/arginine-rich protein specific kinase 2 (predicted)                                                                   | Srpki2_predicted         | 0.986  | 0.391 | 1.413  | 0.004 | 0.746  | 0.047 | 1.149  | 0.049 |
| 1367936_at   | NM_019206 | serine/threonine kinase 10                                                                                                   | Stk10                    | 1.075  | 0.997 | 1.255  | 0.230 | 1.659  | 0.135 | 0.886  | 0.585 |

|              |           |                                                                    |                      |       |       |       |       |       |       |       |       |
|--------------|-----------|--------------------------------------------------------------------|----------------------|-------|-------|-------|-------|-------|-------|-------|-------|
| 1370322_at   | D86220    | serine/threonine kinase 16                                         | Stk16                | 0.612 | 0.137 | 0.367 | 0.053 | 0.680 | 0.035 | 0.662 | 0.074 |
| 1376751_at   | AI044250  | serine/threonine kinase 19                                         | Stk19                | 1.001 | 0.638 | 0.909 | 0.938 | 0.941 | 0.811 | 1.030 | 0.934 |
| 1369037_at   | NM_019349 | serine/threonine kinase 2                                          | Slk                  | 0.900 | 0.456 | 0.696 | 0.143 | 0.902 | 0.463 | 0.693 | 0.146 |
| 1388396_at   | BI275932  | serine/threonine kinase 25 (STE20 homolog, yeast)                  | Stk25                | 1.232 | 0.246 | 0.929 | 0.061 | 1.223 | 0.246 | 0.688 | 0.025 |
| 1369712_at   | NM_031735 | serine/threonine kinase 3 (STE20 homolog, yeast)                   | Stk3                 | 1.219 | 0.242 | 0.998 | 0.989 | 2.611 | 0.012 | 1.135 | 0.354 |
| 1396707_at   | BF404674  | Serine/threonine kinase 32A (predicted)                            | Stk32a_predicted     | 1.006 | 0.930 | 1.021 | 0.047 | 1.000 | 0.990 | 1.033 | 0.104 |
| 1377534_at   | BE097305  | serine/threonine kinase 32C (predicted)                            | Stk32c_predicted     | 0.948 | 0.996 | 0.269 | 0.046 | 1.005 | 0.985 | 0.284 | 0.017 |
| 1390488_a_at | AI176077  | serine/threonine kinase 38                                         | Stk38                | 1.228 | 0.115 | 1.032 | 0.494 | 0.996 | 0.813 | 1.031 | 0.377 |
| 1393520_at   | AA850272  | Serine/threonine kinase 39, STE20/SPS1 homolog (yeast)             | Stk39                | 1.393 | 0.616 | 1.076 | 0.844 | 1.084 | 0.715 | 1.686 | 0.082 |
| 1372077_at   | AI009198  | serine/threonine kinase receptor associated protein                | Strap                | 0.838 | 0.475 | 2.237 | 0.000 | 0.988 | 0.351 | 1.674 | 0.010 |
| 1367725_at   | NM_022602 | serine/threonine-protein kinase pim-3                              | Pim3                 | 0.596 | 0.812 | 3.059 | 0.008 | 0.953 | 0.771 | 2.542 | 0.019 |
| 1396116_at   | BG669152  | serologically defined colon cancer antigen 1                       | Sdccag1              | 0.924 | 0.421 | 0.772 | 0.009 | 1.116 | 0.633 | 0.668 | 0.034 |
| 1374738_at   | BF416387  | serologically defined colon cancer antigen 10                      | Sdccag10             | 1.116 | 0.179 | 2.621 | 0.058 | 1.019 | 0.453 | 1.275 | 0.060 |
| 1371706_at   | AI101371  | serologically defined colon cancer antigen 3                       | Sdccag3              | 0.941 | 0.467 | 0.879 | 0.173 | 0.896 | 0.596 | 1.059 | 0.988 |
| 1383573_at   | BE117444  | Serologically defined colon cancer antigen 33 (predicted)          | Sdccag33_predicted   | 0.484 | 0.005 | 0.301 | 0.000 | 0.593 | 0.004 | 0.444 | 0.003 |
| 1380283_at   | BF411100  | Serologically defined colon cancer antigen 33 (predicted)          | Sdccag33_predicted   | 0.429 | 0.019 | 0.258 | 0.000 | 0.429 | 0.011 | 0.304 | 0.000 |
| 1392611_at   | BE117629  | Serologically defined colon cancer antigen 33 (predicted)          | Sdccag33_predicted   | 0.355 | 0.095 | 0.162 | 0.003 | 0.323 | 0.097 | 0.209 | 0.007 |
| 1372874_at   | BI299261  | Serologically defined colon cancer antigen 8                       | Sdccag8              | 0.521 | 0.032 | 0.349 | 0.004 | 0.541 | 0.042 | 0.409 | 0.012 |
| 1388076_at   | AF388527  | Serpine1 mRNA binding protein 1                                    | Serbp1               | 0.779 | 0.174 | 1.527 | 0.033 | 0.675 | 0.009 | 1.151 | 0.127 |
| 1389153_at   | BI296087  | Serpine1 mRNA binding protein 1                                    | Serbp1               | 0.659 | 0.330 | 0.572 | 0.001 | 0.812 | 0.035 | 0.651 | 0.009 |
| 1387632_at   | NM_022271 | sertolin                                                           | LOC64038             | 0.768 | 0.814 | 0.761 | 0.194 | 0.601 | 0.029 | 1.003 | 0.964 |
| 1382452_at   | AI603408  | serum deprivation response protein                                 | Sdpr                 | 4.027 | 0.095 | 1.299 | 0.180 | 2.697 | 0.124 | 1.217 | 0.151 |
| 1375638_at   | AI009714  | serum deprivation response protein                                 | Sdpr                 | 0.866 | 0.740 | 1.233 | 0.530 | 0.923 | 0.519 | 0.869 | 0.471 |
| 1377827_at   | AA851587  | serum response factor binding protein 1                            | Srfbp1               | 0.973 | 0.416 | 3.876 | 0.049 | 1.042 | 0.779 | 4.059 | 0.085 |
| 1385368_at   | AA998786  | Serum response factor binding protein 1                            | Srfbp1               | 1.109 | 0.718 | 1.257 | 0.501 | 1.724 | 0.210 | 1.507 | 0.037 |
| 1367802_at   | NM_019232 | serum/glucocorticoid regulated kinase                              | Sgk                  | 2.877 | 0.002 | 2.277 | 0.000 | 2.060 | 0.151 | 1.908 | 0.002 |
| 1392262_at   | BF402235  | Seryl-aminoacyl-tRNA synthetase 1                                  | Sars1                | 1.961 | 0.087 | 7.656 | 0.001 | 1.058 | 0.511 | 2.838 | 0.018 |
| 1375441_at   | BI278468  | seryl-aminoacyl-tRNA synthetase 1                                  | Sars1                | 0.874 | 0.511 | 2.597 | 0.004 | 0.705 | 0.023 | 2.396 | 0.002 |
| 1397578_at   | BE099423  | SET and MYND domain containing 1 (predicted)                       | Smyd1_predicted      | 1.010 | 0.990 | 1.007 | 0.973 | 1.003 | 0.989 | 1.004 | 0.944 |
| 1371904_at   | BI294698  | SET and MYND domain containing 2                                   | Smyd2                | 0.640 | 0.222 | 1.299 | 0.001 | 0.805 | 0.046 | 1.109 | 0.498 |
| 1393116_at   | BI286804  | SET and MYND domain containing 4 (predicted)                       | Smyd4_predicted      | 0.594 | 0.101 | 0.561 | 0.042 | 0.634 | 0.101 | 0.665 | 0.061 |
| 1393493_at   | BE117956  | SET binding protein 1 (predicted)                                  | Setbp1_predicted     | 1.053 | 0.068 | 0.883 | 0.675 | 1.415 | 0.652 | 0.966 | 0.801 |
| 1389562_at   | BF396686  | SET binding protein 1 (predicted)                                  | Setbp1_predicted     | 1.309 | 0.113 | 0.804 | 0.420 | 0.736 | 0.158 | 1.070 | 0.358 |
| 1378678_at   | BF417886  | SET binding protein 1 (predicted)                                  | Setbp1_predicted     | 0.993 | 0.403 | 0.559 | 0.062 | 1.015 | 0.897 | 0.700 | 0.050 |
| 1378434_at   | BF400808  | SET binding protein 1 (predicted)                                  | Setbp1_predicted     | 1.435 | 0.530 | 1.243 | 0.892 | 1.176 | 0.677 | 1.757 | 0.150 |
| 1396768_at   | BF404627  | SET binding protein 1 (predicted)                                  | Setbp1_predicted     | 1.078 | 0.870 | 0.803 | 0.476 | 1.034 | 0.855 | 1.409 | 0.217 |
| 1374603_at   | AA943793  | SET domain and mariner transposase fusion gene                     | Setmar               | 1.003 | 0.956 | 0.663 | 0.539 | 0.998 | 0.938 | 0.911 | 0.480 |
| 1382141_at   | BI291928  | SET domain, bifurcated 1 (predicted)                               | Setdb1_predicted     | 1.209 | 0.170 | 1.447 | 0.092 | 0.621 | 0.865 | 1.641 | 0.210 |
|              |           |                                                                    | Set_predicted ///    |       |       |       |       |       |       |       |       |
| 1372461_at   | BG381708  | SET translocation (predicted) /// RGD1561000 (predicted)           | RGD1561000_predicted | 0.840 | 0.061 | 1.948 | 0.019 | 0.650 | 0.004 | 1.509 | 0.027 |
| 1387266_at   | NM_080905 | seven in absentia 1A                                               | Siah1a               | 1.377 | 0.043 | 2.539 | 0.000 | 0.993 | 0.577 | 2.181 | 0.001 |
| 1377647_at   | AA924088  | sex comb on midleg homolog 1 (predicted)                           | Scmh1_predicted      | 1.223 | 0.145 | 1.701 | 0.017 | 0.719 | 0.515 | 1.107 | 0.713 |
| 1389249_at   | BE114850  | SH2 domain binding protein 1 (tetratricopeptide repeat containing) | Sh2bp1               | 0.716 | 0.007 | 0.575 | 0.002 | 0.782 | 0.061 | 0.604 | 0.016 |
| 1385970_at   | BF289079  | SH2 domain binding protein 1 (tetratricopeptide repeat containing) | Sh2bp1               | 0.993 | 0.360 | 0.670 | 0.410 | 1.117 | 0.225 | 0.696 | 0.161 |
| 1371882_a_at | AI104139  | SH2-B PH domain containing signaling mediator 1                    | Sh2bpsm1             | 0.998 | 0.971 | 1.747 | 0.008 | 1.001 | 0.988 | 1.388 | 0.014 |
| 1378926_at   | BF415792  | SH3 and multiple ankyrin repeat domains 1                          | Shank1               | 0.958 | 0.451 | 0.959 | 0.958 | 0.996 | 0.474 | 0.842 | 0.012 |
| 1371487_at   | BG666075  | SH3 domain binding glutamic acid-rich protein-like 3 (predicted)   | Sh3bgrl3_predicted   | 0.717 | 0.813 | 0.852 | 0.289 | 0.343 | 0.008 | 0.735 | 0.299 |
| 1373267_at   | AW527403  | Sh3 domain YSC-like 1 (predicted)                                  | Sh3yl1_predicted     | 0.557 | 0.793 | 0.951 | 0.081 | 1.374 | 0.412 | 1.618 | 0.272 |
| 1369777_a_at | NM_133440 | SH3/ankyrin domain gene 2                                          | Shank2               | 1.363 | 0.187 | 1.718 | 0.006 | 1.201 | 0.325 | 1.969 | 0.039 |
| 1388462_at   | AI407506  | SH3-binding kinase 1                                               | Sbk1                 | 2.044 | 0.019 | 0.846 | 0.458 | 1.376 | 0.089 | 0.451 | 0.049 |
| 1387294_at   | NM_054011 | SH3-domain binding protein 5 (BTK-associated)                      | Sh3bp5               | 1.242 | 0.162 | 2.198 | 0.000 | 0.929 | 0.727 | 2.982 | 0.073 |
| 1367699_at   | AB008161  | SH3-domain GRB2-like 1                                             | Sh3gl1               | 1.173 | 0.201 | 1.835 | 0.007 | 1.157 | 0.212 | 1.031 | 0.804 |
| 1389550_at   | BM385941  | SH3-domain GRB2-like 2                                             | Sh3gl2               | 0.965 | 0.441 | 0.390 | 0.017 | 0.996 | 0.917 | 0.684 | 0.022 |
| 1381203_at   | AA819246  | SH3-domain GRB2-like B1 (endophilin)                               | Sh3glb1              | 2.585 | 0.000 | 1.961 | 0.013 | 4.243 | 0.006 | 2.605 | 0.002 |
| 1390096_at   | BF284481  | SH3-domain GRB2-like B1 (endophilin)                               | Sh3glb1              | 1.677 | 0.001 | 0.315 | 0.005 | 2.160 | 0.002 | 0.502 | 0.012 |
| 1382007_at   | AA964563  | SH3-domain GRB2-like B1 (endophilin)                               | Sh3glb1              | 1.893 | 0.043 | 2.173 | 0.005 | 1.847 | 0.028 | 2.370 | 0.006 |
| 1391759_at   | BF283873  | SH3-domain GRB2-like B1 (endophilin)                               | Sh3glb1              | 1.760 | 0.103 | 0.997 | 0.931 | 1.457 | 0.014 | 0.994 | 0.964 |
| 1376486_at   | BG381092  | SH3-domain GRB2-like endophilin B2                                 | Sh3glb2              | 0.529 | 0.012 | 0.518 | 0.019 | 0.607 | 0.028 | 0.711 | 0.106 |
| 1370419_a_at | AF230520  | SH3-domain kinase binding protein 1                                | Sh3kbp1              | 1.041 | 0.894 | 0.789 | 0.790 | 1.002 | 0.864 | 1.113 | 0.152 |
| 1387957_a_at | AF255888  | SH3-domain kinase binding protein 1                                | Sh3kbp1              | 1.072 | 0.942 | 0.813 | 0.069 | 1.512 | 0.626 | 0.872 | 0.137 |
| 1372970_at   | BM389664  | Sh3kbp1 binding protein 1 (predicted)                              | Shkbp1_predicted     | 0.778 | 0.030 | 0.894 | 0.605 | 0.871 | 0.428 | 0.895 | 0.472 |

|            |           |                                                                                                                                     |                      |         |       |        |       |        |       |        |       |
|------------|-----------|-------------------------------------------------------------------------------------------------------------------------------------|----------------------|---------|-------|--------|-------|--------|-------|--------|-------|
| 1368069_at | NM_031153 | SHANK-associated RH domain interacting protein                                                                                      | Sharpin              | 0.583   | 0.118 | 0.942  | 0.138 | 1.174  | 0.460 | 1.112  | 0.890 |
| 1377986_at | AI029749  | short coiled-coil protein /// similar to short coiled-coil protein                                                                  | Scoc /// LOC498931   | 1.433   | 0.010 | 0.828  | 0.050 | 1.183  | 0.092 | 0.776  | 0.035 |
| 1388822_at | AI409077  | short coiled-coil protein /// similar to short coiled-coil protein                                                                  | Scoc /// LOC498931   | 1.006   | 0.984 | 0.662  | 0.006 | 1.425  | 0.032 | 0.912  | 0.207 |
| 1387349_at | NM_013028 | short stature homeobox 2                                                                                                            | Shox2                | 0.953   | 0.728 | 1.023  | 0.205 | 1.239  | 0.015 | 0.831  | 0.077 |
| 1378940_at | AI170278  | SHQ1 homolog (S. cerevisiae) (predicted)                                                                                            | Shq1_predicted       | 1.191   | 0.368 | 1.127  | 0.139 | 1.060  | 0.648 | 1.055  | 0.779 |
| 1384363_at | AI070597  | Shwachman-Bodian-Diamond syndrome homolog (human)                                                                                   | Sbds                 | 0.616   | 0.072 | 1.003  | 0.997 | 0.962  | 0.349 | 1.003  | 0.979 |
| 1374436_at | AI070122  | Shwachman-Bodian-Diamond syndrome homolog (human)                                                                                   | Sbds                 | 1.393   | 0.320 | 1.052  | 0.347 | 1.268  | 0.139 | 1.038  | 0.670 |
| 1392012_at | BE100353  | Siah binding protein 1; FBP interacting repressor; pyrimidine tract binding splicing factor; Ro ribonucleoprotein-binding protein 1 | Siahbp1              | 13.309  | 0.014 | 1.233  | 0.053 | 8.218  | 0.019 | 1.290  | 0.187 |
| 1367464_at | AI598391  | siah binding protein 1; FBP interacting repressor; pyrimidine tract binding splicing factor; Ro ribonucleoprotein-binding protein 1 | Siahbp1              | 0.943   | 0.504 | 1.655  | 0.004 | 0.907  | 0.274 | 1.405  | 0.157 |
| 1388828_at | AI579643  | SID1 transmembrane family, member 2 (predicted)                                                                                     | Sidt2_predicted      | 1.282   | 0.076 | 0.950  | 0.651 | 1.037  | 0.050 | 1.022  | 0.380 |
| 1372715_at | AA819349  | sideroflexin 1                                                                                                                      | Sfxn1                | 0.394   | 0.011 | 0.846  | 0.112 | 0.379  | 0.000 | 0.809  | 0.136 |
| 1387008_at | NM_022948 | sideroflexin 3                                                                                                                      | Sfxn3                | 0.351   | 0.112 | 0.145  | 0.000 | 0.384  | 0.007 | 0.515  | 0.081 |
| 1393204_at | AI711190  | sideroflexin 4 (predicted)                                                                                                          | Sfxn4_predicted      | 0.703   | 0.170 | 1.556  | 0.040 | 1.344  | 0.593 | 1.569  | 0.036 |
| 1371427_at | BG380709  | signal peptidase complex subunit 1 homolog (S. cerevisiae) (predicted)                                                              | Spcs1_predicted      | 0.906   | 0.754 | 0.813  | 0.075 | 1.090  | 0.526 | 0.985  | 0.226 |
| 1389140_at | AI172437  | signal peptidase complex subunit 2 homolog (S. cerevisiae) (predicted)                                                              | Spcs2_predicted      | 0.728   | 0.795 | 2.033  | 0.005 | 0.705  | 0.323 | 1.856  | 0.016 |
| 1367476_at | AA799994  | signal recognition particle 14 (predicted)                                                                                          | Srp14_predicted      | 0.785   | 0.455 | 0.730  | 0.025 | 0.801  | 0.183 | 0.953  | 0.044 |
| 1388974_at | AI101527  | signal recognition particle 19 (predicted)                                                                                          | Srp19_predicted      | 0.615   | 0.289 | 1.473  | 0.014 | 0.560  | 0.031 | 1.314  | 0.142 |
| 1383410_at | BI290777  | signal recognition particle 54                                                                                                      | Srp54                | 0.910   | 0.267 | 1.503  | 0.019 | 0.877  | 0.284 | 1.212  | 0.000 |
| 1385680_at | BG667707  | signal recognition particle 54                                                                                                      | Srp54                | 0.644   | 0.909 | 1.240  | 0.110 | 0.873  | 0.718 | 1.042  | 0.941 |
| 1371626_at | BI296671  | signal recognition particle 68 (predicted)                                                                                          | Srp68_predicted      | 0.716   | 0.381 | 1.251  | 0.006 | 0.724  | 0.152 | 1.016  | 0.407 |
| 1371343_at | BM391232  | signal recognition particle receptor ('docking protein')                                                                            | Srpr                 | 0.822   | 0.329 | 0.734  | 0.010 | 0.846  | 0.182 | 0.743  | 0.003 |
| 1382166_at | BF407425  | signal recognition particle receptor, B subunit                                                                                     | Srprb                | 0.404   | 0.620 | 1.369  | 0.235 | 0.632  | 0.176 | 1.015  | 0.347 |
| 1378932_at | AI103196  | Signal recognition particle receptor, B subunit                                                                                     | Srprb                | 0.584   | 0.814 | 1.064  | 0.575 | 0.600  | 0.044 | 1.116  | 0.570 |
| 1367690_at | NM_017199 | signal sequence receptor 4                                                                                                          | Ssr4                 | 0.727   | 0.707 | 0.592  | 0.007 | 0.732  | 0.220 | 0.592  | 0.006 |
| 1373090_at | AI230697  | signal sequence receptor, alpha                                                                                                     | Ssr1                 | 0.663   | 0.501 | 1.270  | 0.473 | 0.781  | 0.357 | 0.939  | 0.825 |
| 1381987_at | AI175803  | Signal sequence receptor, alpha                                                                                                     | Ssr1                 | 0.947   | 0.703 | 0.827  | 0.060 | 0.936  | 0.802 | 0.571  | 0.013 |
| 1391283_at | AI713146  | Signal sequence receptor, alpha                                                                                                     | Ssr1                 | 1.000   | 0.945 | 1.000  | 0.978 | 1.462  | 0.121 | 0.998  | 0.156 |
| 1390767_at | BF391148  | signal sequence receptor, alpha                                                                                                     | Ssr1                 | 0.725   | 0.985 | 1.090  | 0.057 | 0.752  | 0.589 | 0.992  | 0.865 |
| 1382738_at | BF282918  | Signal sequence receptor, beta (predicted)                                                                                          | Ssr2_predicted       | 0.628   | 0.111 | 1.040  | 0.855 | 0.700  | 0.295 | 0.930  | 0.656 |
| 1373185_at | BE329347  | signal sequence receptor, beta (predicted)                                                                                          | Ssr2_predicted       | 0.640   | 0.239 | 0.914  | 0.122 | 0.603  | 0.024 | 0.915  | 0.021 |
| 1375652_at | BI285910  | signal sequence receptor, gamma                                                                                                     | Ssr3                 | 1.032   | 0.482 | 1.234  | 0.551 | 1.188  | 0.338 | 1.304  | 0.383 |
| 1369718_at | NM_031120 | signal sequence receptor, gamma                                                                                                     | Ssr3                 | 1.006   | 0.852 | 1.306  | 0.699 | 0.336  | 0.211 | 1.391  | 0.439 |
| 1388777_at | BE113224  | signal sequence receptor, gamma                                                                                                     | Ssr3                 | 1.061   | 0.880 | 0.973  | 0.435 | 1.081  | 0.667 | 1.136  | 0.387 |
| 1387354_at | NM_032612 | signal transducer and activator of transcription 1                                                                                  | Stat1                | 28.134  | 0.000 | 9.902  | 0.002 | 23.797 | 0.000 | 13.394 | 0.002 |
| 1368835_at | AW434718  | signal transducer and activator of transcription 1                                                                                  | Stat1                | 14.504  | 0.000 | 5.499  | 0.000 | 19.507 | 0.000 | 8.666  | 0.001 |
| 1372757_at | BM386875  | signal transducer and activator of transcription 1                                                                                  | Stat1                | 7.381   | 0.001 | 4.737  | 0.000 | 8.266  | 0.000 | 7.279  | 0.002 |
| 1373670_at | AA799569  | Signal transducer and activator of transcription 2                                                                                  | Stat2                | 10.314  | 0.000 | 4.284  | 0.011 | 22.175 | 0.001 | 4.592  | 0.003 |
| 1389571_at | BG666368  | signal transducer and activator of transcription 2                                                                                  | Stat2                | 17.983  | 0.007 | 32.826 | 0.007 | 25.498 | 0.000 | 49.365 | 0.001 |
| 1370224_at | BE113920  | signal transducer and activator of transcription 3                                                                                  | Stat3                | 2.662   | 0.002 | 2.924  | 0.056 | 2.863  | 0.001 | 1.905  | 0.094 |
| 1371781_at | BI285863  | signal transducer and activator of transcription 3                                                                                  | Stat3                | 2.016   | 0.003 | 1.616  | 0.031 | 2.963  | 0.005 | 1.658  | 0.013 |
| 1368231_at | NM_017064 | signal transducer and activator of transcription 5A                                                                                 | Stat5a               | 1.010   | 0.869 | 1.313  | 0.632 | 0.824  | 0.869 | 1.209  | 0.303 |
| 1387876_at | AI177626  | signal transducer and activator of transcription 5B                                                                                 | Stat5b               | 1.332   | 0.100 | 3.244  | 0.002 | 1.227  | 0.121 | 1.415  | 0.296 |
| 1391527_at | BE109296  | Signal transducer and activator of transcription 6 (predicted)                                                                      | Stat6_predicted      | 1.477   | 0.047 | 1.815  | 0.164 | 2.219  | 0.018 | 1.437  | 0.095 |
| 1367533_at | BG663097  | signal transducer and activator of transcription interacting protein 1                                                              | Statip1              | 0.614   | 0.024 | 0.797  | 0.012 | 0.786  | 0.053 | 0.941  | 0.233 |
| 1392017_at | BF397766  | Signal transducing adaptor molecule (SH3 domain and ITAM motif) 2                                                                   | Stam2                | 2.324   | 0.008 | 1.251  | 0.253 | 1.819  | 0.134 | 1.168  | 0.431 |
| 1370330_at | AF026504  | signal-induced proliferation-associated 1 like 1                                                                                    | Sipa111              | 0.932   | 0.889 | 0.834  | 0.143 | 0.812  | 0.034 | 0.673  | 0.138 |
| 1376040_at | BI290044  | signal-induced proliferation-associated 1 like 2                                                                                    | Sipa112              | 1.291   | 0.068 | 0.875  | 0.044 | 0.905  | 0.506 | 0.670  | 0.054 |
| 1377690_at | AA818651  | signal-induced proliferation-associated 1 like 3                                                                                    | Sipa113              | 1.040   | 0.503 | 0.949  | 0.615 | 1.036  | 0.511 | 0.761  | 0.613 |
| 1394538_at | BF404879  | Signal-induced proliferation-associated gene 1                                                                                      | Sipa1                | 0.923   | 0.588 | 0.984  | 0.856 | 0.998  | 0.553 | 0.996  | 0.762 |
| 1389420_at | BI279446  | signal-transducing adaptor protein-2                                                                                                | Stap2                | 1.725   | 0.038 | 1.551  | 0.089 | 20.298 | 0.003 | 8.760  | 0.012 |
| 1376465_at | BI295240  | Sim ilar to glucocorticoid induced gene 1 (predicted)                                                                               | RGD1563869_predicted | 0.862   | 0.302 | 0.641  | 0.066 | 0.394  | 0.055 | 0.576  | 0.031 |
| 1381670_at | BF412681  | Similar to [Ascaris lumbricoides mRNA sequence.], gene product (predicted)                                                          | RGD1561753_predicted | 1.144   | 0.685 | 1.694  | 0.338 | 0.987  | 0.960 | 1.529  | 0.198 |
| 1388773_at | BI278479  | similar to [Mouse primary response gene B94 mRNA, 3end.], gene product                                                              | LOC299339            | 201.549 | 0.000 | 70.732 | 0.000 | 35.437 | 0.013 | 6.162  | 0.003 |
| 1381376_at | AI103284  | Similar to [Mouse primary response gene B94 mRNA, 3end.], gene product                                                              | LOC299339            | 6.883   | 0.011 | 4.389  | 0.016 | 1.943  | 0.478 | 1.027  | 0.780 |
| 1371905_at | BM384949  | similar to 0610007L01Rik protein                                                                                                    | MGC94190             | 0.640   | 0.024 | 1.208  | 0.035 | 0.715  | 0.041 | 1.085  | 0.074 |
| 1379064_at | BI296614  | Similar to 0610007L01Rik protein                                                                                                    | MGC94190             | 1.224   | 0.773 | 1.866  | 0.435 | 1.051  | 0.843 | 1.497  | 0.080 |
| 1398927_at | BF406225  | similar to 0610010K06Rik protein                                                                                                    | RGD1307161           | 0.806   | 0.224 | 0.935  | 0.053 | 0.845  | 0.624 | 0.776  | 0.068 |
| 1372303_at | BE110633  | similar to 0910001A06Rik protein (predicted)                                                                                        | RGD1307697_predicted | 1.097   | 0.834 | 1.041  | 0.350 | 1.033  | 0.934 | 0.740  | 0.053 |
| 1374822_at | BE118465  | Similar to 106 kDa O-GlcNAc transferase-interacting protein (predicted)                                                             | RGD1307844_predicted | 1.650   | 0.418 | 2.614  | 0.001 | 1.171  | 0.925 | 1.854  | 0.001 |



|              |          |                                                                                               |                                                  |        |       |       |       |        |       |        |       |
|--------------|----------|-----------------------------------------------------------------------------------------------|--------------------------------------------------|--------|-------|-------|-------|--------|-------|--------|-------|
| 1373605_at   | AI176540 | similar to 106 kDa O-GlcNAc transferase-interacting protein (predicted)                       | RGD1307844_predicted                             | 1.248  | 0.545 | 1.273 | 0.075 | 1.120  | 0.053 | 1.259  | 0.270 |
| 1373174_at   | AW915592 | similar to 1110001K21Rik protein                                                              | LOC497867                                        | 0.840  | 0.067 | 0.679 | 0.014 | 0.622  | 0.180 | 0.705  | 0.066 |
| 1390042_at   | AI071166 | similar to 1110007F12Rik protein                                                              | MGC109491                                        | 24.900 | 0.000 | 5.697 | 0.008 | 52.784 | 0.001 | 13.685 | 0.008 |
| 1393100_at   | AI071493 | similar to 1110008L16Rik protein (predicted)                                                  | RGD1305089_predicted                             | 0.806  | 0.550 | 0.560 | 0.045 | 0.930  | 0.993 | 1.016  | 0.305 |
| 1390448_at   | AA800699 | similar to 1110065L07Rik protein (predicted)                                                  | RGD1308317_predicted                             | 0.998  | 0.935 | 0.991 | 0.794 | 0.999  | 0.995 | 1.001  | 0.990 |
| 1376476_at   | BI279598 | similar to 1200003M09Rik protein (predicted)                                                  | RGD1305553_predicted                             | 0.864  | 0.991 | 0.867 | 0.320 | 1.067  | 0.762 | 0.857  | 0.277 |
| 1380735_at   | BM385424 | Similar to 1500019C06Rik protein (predicted)                                                  | RGD1560433_predicted                             | 1.308  | 0.046 | 0.768 | 0.254 | 0.977  | 0.822 | 0.606  | 0.118 |
| 1380694_at   | BM390450 | Similar to 1500019C06Rik protein (predicted)                                                  | RGD1560433_predicted                             | 1.097  | 0.185 | 0.902 | 0.095 | 0.973  | 0.769 | 0.792  | 0.040 |
| 1382797_at   | AW526331 | similar to 1500019C06Rik protein (predicted)                                                  | RGD1560433_predicted                             | 0.619  | 0.517 | 1.788 | 0.016 | 0.490  | 0.087 | 1.586  | 0.039 |
| 1374756_at   | BI295129 | similar to 1500031N24Rik protein (predicted) /// similar to 1500031N24Rik protein (predicted) | RGD1311188_predicted ///<br>RGD1562665_predicted | 1.467  | 0.317 | 1.101 | 0.534 | 1.014  | 0.890 | 1.026  | 0.700 |
| 1372934_at   | AI104146 | similar to 1700019E19Rik protein (predicted)                                                  | RGD1307392_predicted                             | 1.823  | 0.022 | 0.671 | 0.154 | 1.250  | 0.043 | 0.997  | 0.945 |
| 1374701_at   | BG378096 | similar to 1700022N24Rik protein                                                              | MGC109455                                        | 0.757  | 0.599 | 1.832 | 0.003 | 0.723  | 0.078 | 1.461  | 0.041 |
| 1374245_at   | BI282085 | similar to 1700029B21Rik protein                                                              | LOC363251                                        | 0.982  | 0.885 | 1.751 | 0.003 | 0.987  | 0.909 | 1.111  | 0.354 |
| 1379972_at   | AI070438 | similar to 1700060H10Rik protein                                                              | RGD1308699                                       | 0.482  | 0.096 | 0.569 | 0.012 | 0.439  | 0.037 | 0.928  | 0.331 |
| 1371891_at   | BG371476 | similar to 1700123O20Rik protein (predicted)                                                  | RGD1308430_predicted                             | 0.562  | 0.436 | 0.738 | 0.082 | 0.736  | 0.091 | 0.738  | 0.208 |
| 1390730_at   | BM383911 | similar to 1810009O10Rik protein                                                              | RGD1305651                                       | 0.372  | 0.044 | 0.299 | 0.000 | 0.436  | 0.056 | 0.348  | 0.008 |
| 1371631_at   | BF420639 | similar to 2010003J03Rik protein                                                              | RGD1304686                                       | 0.908  | 0.458 | 2.921 | 0.009 | 0.907  | 0.413 | 1.832  | 0.030 |
| 1372154_at   | AW521019 | similar to 2010321M09Rik protein                                                              | RGD1359616                                       | 0.730  | 0.061 | 0.988 | 0.834 | 0.659  | 0.006 | 1.080  | 0.131 |
| 1371749_at   | AI169439 | similar to 2210021J22Rik protein (predicted)                                                  | RGD1306001_predicted                             | 0.530  | 0.116 | 1.242 | 0.060 | 0.532  | 0.198 | 1.092  | 0.063 |
| 1377598_at   | AJ225648 | similar to 2310002F18Rik protein                                                              | MGC124824                                        | 0.420  | 0.091 | 0.443 | 0.003 | 0.422  | 0.003 | 0.464  | 0.047 |
| 1376455_at   | BI296172 | similar to 2310010G13Rik protein                                                              | MGC114471                                        | 0.480  | 0.060 | 0.835 | 0.144 | 0.497  | 0.044 | 1.000  | 0.180 |
| 1380072_at   | AI233871 | similar to 2310044H10Rik protein                                                              | MGC93975                                         | 0.742  | 0.981 | 0.928 | 0.334 | 0.999  | 0.988 | 0.929  | 0.298 |
| 1398890_at   | AI410096 | similar to 2310044H10Rik protein                                                              | MGC93975                                         | 0.985  | 0.981 | 0.803 | 0.001 | 0.913  | 0.572 | 0.767  | 0.006 |
| 1372396_at   | BE113316 | Similar to 2310047B19Rik protein (predicted)                                                  | RGD1308026_predicted                             | 0.479  | 0.082 | 0.739 | 0.047 | 0.508  | 0.014 | 0.695  | 0.575 |
| 1373115_at   | BI281909 | similar to 2310061I09Rik protein (predicted)                                                  | RGD1304653_predicted                             | 1.060  | 0.773 | 1.281 | 0.360 | 1.236  | 0.704 | 1.104  | 0.596 |
| 1398949_at   | BM392094 | similar to 2410001C21Rik protein                                                              | RGD1311072                                       | 0.528  | 0.001 | 0.805 | 0.043 | 0.779  | 0.105 | 0.898  | 0.170 |
| 1388402_at   | AI175019 | similar to 2410001H17Rik protein (predicted)                                                  | RGD1305824_predicted                             | 1.038  | 0.669 | 0.864 | 0.179 | 1.094  | 0.621 | 0.937  | 0.439 |
| 1388923_at   | BG381657 | similar to 2410004L22Rik protein                                                              | RGD1311565                                       | 2.526  | 0.023 | 1.085 | 0.285 | 3.421  | 0.058 | 0.504  | 0.016 |
| 1393218_at   | AI176155 | Similar to 2410024A21Rik protein                                                              | RGD1304878                                       | 1.142  | 0.062 | 0.770 | 0.415 | 1.141  | 0.191 | 1.006  | 0.897 |
| 1372429_at   | BF419113 | similar to 24432 protein                                                                      | LOC307798                                        | 0.439  | 0.001 | 0.578 | 0.010 | 0.460  | 0.036 | 0.631  | 0.125 |
| 1383955_at   | BF554586 | Similar to 2510002A14Rik protein (predicted)                                                  | RGD1311309_predicted                             | 1.348  | 0.690 | 1.054 | 0.134 | 1.060  | 0.788 | 1.123  | 0.043 |
| 1374764_at   | BG378053 | similar to 2610033H07Rik protein (predicted)                                                  | RGD1305605_predicted                             | 0.615  | 0.482 | 1.041 | 0.840 | 0.924  | 0.256 | 1.099  | 0.715 |
| 1384786_at   | AI073019 | Similar to 2610034M16Rik protein (predicted)                                                  | RGD1560925_predicted                             | 1.171  | 0.889 | 1.180 | 0.320 | 1.286  | 0.983 | 0.972  | 0.096 |
| 1389361_at   | AI012506 | similar to 2610111M03Rik protein                                                              | LOC363544                                        | 0.273  | 0.010 | 0.854 | 0.184 | 0.405  | 0.007 | 0.666  | 0.032 |
| 1374707_at   | BM384854 | similar to 2610301G19Rik protein (predicted)                                                  | RGD1309922_predicted                             | 1.591  | 0.198 | 0.808 | 0.347 | 1.180  | 0.659 | 0.857  | 0.222 |
| 1377010_at   | BI274499 | similar to 2610317D23Rik protein (predicted)                                                  | RGD1565411_predicted                             | 0.945  | 0.779 | 0.797 | 0.385 | 0.793  | 0.313 | 0.942  | 0.323 |
| 1393158_at   | BI298434 | similar to 2610528M18Rik protein                                                              | LOC363198                                        | 2.455  | 0.028 | 0.971 | 0.615 | 2.243  | 0.032 | 1.265  | 0.239 |
| 1375763_at   | BF407879 | similar to 2700008B19Rik protein (predicted)                                                  | RGD1566204_predicted                             | 0.944  | 0.480 | 1.064 | 0.016 | 1.010  | 0.178 | 1.090  | 0.172 |
| 1389652_at   | AI171655 | Similar to 2700029M09Rik protein (predicted)                                                  | RGD1311747_predicted                             | 0.699  | 0.249 | 0.687 | 0.006 | 0.697  | 0.063 | 0.832  | 0.007 |
| 1378638_a_at | BM384709 | similar to 2700029M09Rik protein (predicted)                                                  | RGD1311747_predicted                             | 0.444  | 0.670 | 0.868 | 0.123 | 0.608  | 0.289 | 0.620  | 0.012 |
| 1374067_at   | AA852011 | similar to 2700078E11Rik protein                                                              | RGD1308127                                       | 0.815  | 0.608 | 1.201 | 0.149 | 0.761  | 0.006 | 1.094  | 0.071 |
| 1389298_at   | AI412864 | Similar to 2700078E11Rik protein                                                              | RGD1308127                                       | 0.966  | 0.939 | 1.034 | 0.427 | 1.065  | 0.704 | 1.105  | 0.720 |
| 1388791_at   | BI275911 | similar to 2810022L02Rik protein                                                              | RGD1309930                                       | 1.829  | 0.033 | 1.718 | 0.026 | 2.721  | 0.007 | 2.557  | 0.027 |
| 1367541_at   | BE113965 | similar to 2810410A08Rik protein (predicted)                                                  | RGD1566062_predicted                             | 0.630  | 0.017 | 1.115 | 0.091 | 0.309  | 0.125 | 1.060  | 0.398 |
| 1372891_at   | BF408856 | similar to 2810437L13Rik protein (predicted)                                                  | RGD1305631_predicted                             | 0.749  | 0.072 | 1.079 | 0.351 | 0.899  | 0.253 | 1.088  | 0.287 |
| 1376498_at   | BI282766 | similar to 2900002H16Rik protein (predicted)                                                  | RGD1307973_predicted                             | 0.287  | 0.063 | 2.014 | 0.011 | 0.356  | 0.048 | 1.326  | 0.125 |
| 1374981_at   | BF399062 | similar to 2-aminoadipic 6-semialdehyde dehydrogenase (predicted)                             | RGD1311135_predicted                             | 1.011  | 0.900 | 0.570 | 0.230 | 0.950  | 0.852 | 1.367  | 0.745 |
| 1377187_at   | BI291427 | similar to 3000004N20Rik protein (predicted) /// similar to RIKEN cDNA 3000004N20 (predicted) | RGD1307658_predicted ///<br>RGD1564940_predicted | 0.821  | 0.080 | 0.964 | 0.686 | 0.708  | 0.065 | 0.861  | 0.928 |
| 1379537_at   | AW251543 | similar to 3222401M22Rik protein (predicted)                                                  | RGD1307304_predicted                             | 1.001  | 0.947 | 0.997 | 0.980 | 0.995  | 0.945 | 0.999  | 0.972 |
| 1375052_at   | AI229218 | similar to 3300001A09Rik protein                                                              | LOC501015                                        | 1.406  | 0.176 | 4.033 | 0.037 | 1.009  | 0.966 | 4.061  | 0.028 |
| 1379894_at   | AI501165 | similar to 3632451O06Rik protein (predicted)                                                  | RGD1310110_predicted                             | 0.802  | 0.897 | 1.008 | 0.634 | 1.051  | 0.995 | 1.327  | 0.342 |
| 1397580_at   | AI500809 | Similar to 40S ribosomal protein S16 (predicted)                                              | RGD1564574_predicted                             | 1.270  | 0.135 | 0.995 | 0.966 | 0.946  | 0.841 | 1.165  | 0.073 |
| 1392131_at   | AI012870 | similar to 40S ribosomal protein S2 (predicted)                                               | RGD1566024_predicted                             | 0.516  | 0.009 | 0.700 | 0.081 | 0.528  | 0.010 | 0.693  | 0.107 |
| 1393051_at   | BF551457 | similar to 40S ribosomal protein S29                                                          | LOC501619                                        | 0.937  | 0.885 | 1.016 | 0.749 | 0.757  | 0.247 | 0.924  | 0.352 |
| 1389638_at   | BG380701 | similar to 4632419K20Rik protein                                                              | MGC94288                                         | 1.548  | 0.105 | 2.759 | 0.012 | 1.437  | 0.139 | 1.689  | 0.363 |
| 1371507_at   | BM384151 | Similar to 4921517L17Rik protein                                                              | RGD1311678                                       | 0.541  | 0.000 | 0.461 | 0.002 | 0.659  | 0.001 | 0.670  | 0.010 |
| 1391224_at   | AI169436 | similar to 4921517L17Rik protein                                                              | RGD1311678                                       | 0.886  | 0.293 | 1.677 | 0.051 | 0.977  | 0.934 | 3.721  | 0.012 |
| 1394427_at   | AW524670 | Similar to 4921517L17Rik protein                                                              | RGD1311678                                       | 0.940  | 0.380 | 0.483 | 0.029 | 0.899  | 0.459 | 0.488  | 0.027 |
| 1395064_at   | BE118876 | similar to 4930429A08Rik protein (predicted)                                                  | RGD1564943_predicted                             | 0.800  | 0.445 | 0.408 | 0.030 | 0.962  | 0.741 | 0.500  | 0.015 |

|              |          |                                                                                                          |                      |       |       |       |       |       |       |       |       |
|--------------|----------|----------------------------------------------------------------------------------------------------------|----------------------|-------|-------|-------|-------|-------|-------|-------|-------|
| 1382907_at   | BI289723 | similar to 4930431B09Rik protein                                                                         | LOC310721            | 0.909 | 0.734 | 0.371 | 0.000 | 0.602 | 0.027 | 0.423 | 0.000 |
| 1389883_at   | BF284719 | Similar to 4930438D12Rik protein (predicted)                                                             | RGD1563224_predicted | 0.659 | 0.310 | 0.650 | 0.019 | 0.738 | 0.026 | 0.566 | 0.006 |
| 1373961_at   | AI170410 | similar to 4930453N24Rik protein                                                                         | MGC95208             | 5.128 | 0.004 | 6.848 | 0.005 | 8.191 | 0.000 | 9.156 | 0.004 |
| 1382630_at   | BI302656 | Similar to 4930506M07Rik protein (predicted)                                                             | RGD1311558_predicted | 1.676 | 0.206 | 1.547 | 0.014 | 1.000 | 0.885 | 1.339 | 0.036 |
| 1374362_at   | BF412970 | similar to 4930566A11Rik protein (predicted)                                                             | RGD1306674_predicted | 1.432 | 0.068 | 0.860 | 0.692 | 2.435 | 0.179 | 0.970 | 0.438 |
| 1375657_at   | BE107438 | Similar to 4933407C03Rik protein (predicted)                                                             | RGD1306101_predicted | 0.750 | 0.048 | 0.940 | 0.449 | 0.829 | 0.207 | 0.969 | 0.274 |
| 1382064_at   | BE095778 | similar to 4933407C03Rik protein (predicted)                                                             | RGD1306101_predicted | 0.613 | 0.449 | 1.150 | 0.251 | 0.485 | 0.144 | 0.917 | 0.341 |
| 1397096_at   | BF413218 | Similar to 4933407C03Rik protein (predicted)                                                             | RGD1306101_predicted | 1.256 | 0.890 | 0.974 | 0.454 | 0.876 | 0.215 | 1.439 | 0.197 |
| 1373988_at   | BM387458 | similar to 4933425L03Rik protein (predicted)                                                             | RGD1559481_predicted | 1.381 | 0.682 | 1.728 | 0.085 | 2.606 | 0.158 | 1.802 | 0.098 |
| 1393354_at   | BE097947 | Similar to 4933427D14Rik protein (predicted)                                                             | RGD1304728_predicted | 0.708 | 0.031 | 0.888 | 0.727 | 1.217 | 0.335 | 1.002 | 0.953 |
| 1381558_at   | BG374759 | Similar to 4933427D14Rik protein (predicted)                                                             | RGD1304728_predicted | 1.846 | 0.091 | 0.960 | 0.835 | 1.128 | 0.740 | 1.089 | 0.358 |
| 1393057_at   | BF404098 | similar to 5730403M16Rik protein                                                                         | LOC308320            | 1.868 | 0.035 | 0.699 | 0.878 | 2.169 | 0.011 | 1.274 | 0.047 |
| 1374220_at   | AI599176 | similar to 5730405I09Rik protein (predicted)                                                             | RGD1565969_predicted | 0.362 | 0.498 | 0.369 | 0.026 | 0.518 | 0.168 | 0.394 | 0.036 |
| 1392579_at   | BI295501 | similar to 5830411E10Rik protein                                                                         | RGD1306658           | 0.534 | 0.155 | 0.566 | 0.012 | 0.847 | 0.622 | 0.882 | 0.845 |
| 1376701_a_at | BE109436 | similar to 5930416I19Rik protein                                                                         | MGC94282             | 0.968 | 0.580 | 1.167 | 0.049 | 1.000 | 0.998 | 1.246 | 0.606 |
| 1378180_at   | BI284767 | similar to 6030466N05Rik protein                                                                         | LOC290741            | 1.328 | 0.351 | 1.431 | 0.230 | 0.919 | 0.904 | 1.154 | 0.989 |
| 1375181_at   | AI170643 | similar to 60S ribosomal protein L12                                                                     | LOC499782            | 1.052 | 0.331 | 1.609 | 0.005 | 0.852 | 0.844 | 1.476 | 0.001 |
| 1398324_at   | BI279866 | similar to 60S ribosomal protein L18a                                                                    | MGC72957             | 0.847 | 0.631 | 1.281 | 0.111 | 0.686 | 0.023 | 1.147 | 0.191 |
| 1371313_at   | AI172199 | similar to 60S ribosomal protein L23a (predicted)                                                        | RGD1565656_predicted | 0.954 | 0.811 | 1.293 | 0.079 | 0.832 | 0.200 | 1.114 | 0.046 |
| 1375632_at   | H35210   | similar to 60S ribosomal protein L38 (predicted)                                                         | RGD1561636_predicted | 0.940 | 0.251 | 1.094 | 0.879 | 0.961 | 0.211 | 1.021 | 0.365 |
| 1373976_at   | BF396534 | similar to 8430411H09Rik protein (predicted)                                                             | RGD1563990_predicted | 1.001 | 0.986 | 1.063 | 0.647 | 1.151 | 0.348 | 1.048 | 0.822 |
| 1384117_at   | BF555676 | similar to 9130011E15Rik protein (predicted)                                                             | RGD1564887_predicted | 0.736 | 0.039 | 0.969 | 0.300 | 0.511 | 0.031 | 1.677 | 0.135 |
| 1372112_at   | AA945761 | similar to 9230105E10Rik protein                                                                         | RGD1304579           | 4.981 | 0.000 | 1.366 | 0.037 | 6.842 | 0.000 | 2.779 | 0.011 |
| 1393225_at   | BE115446 | Similar to a disintegrin-like and metalloprotease (reprolysin type) with thrombospondin type 1 motif, 10 | LOC314655            | 1.001 | 0.965 | 0.956 | 0.868 | 1.004 | 0.998 | 0.986 | 0.488 |
| 1389655_at   | AA892330 | similar to A230072I16Rik protein                                                                         | RGD1306819           | 0.512 | 0.024 | 3.366 | 0.008 | 0.620 | 0.008 | 3.298 | 0.012 |
| 1372917_at   | AI111992 | similar to A230072I16Rik protein                                                                         | RGD1306819           | 0.651 | 0.100 | 0.652 | 0.034 | 0.580 | 0.100 | 0.659 | 0.035 |
| 1379544_at   | AI146108 | Similar to A530083I02Rik protein (predicted)                                                             | RGD1311357_predicted | 1.290 | 0.590 | 0.862 | 0.388 | 1.425 | 0.030 | 0.726 | 0.090 |
| 1377407_at   | BI290154 | similar to Aa2-174                                                                                       | RGD1309578           | 0.866 | 0.763 | 1.002 | 0.981 | 0.990 | 0.949 | 1.000 | 0.992 |
| 1375044_at   | AI073208 | Similar to Ab1-133                                                                                       | RGD1306344           | 2.240 | 0.045 | 1.001 | 0.649 | 2.226 | 0.043 | 1.005 | 0.965 |
| 1396265_at   | BE097728 | Similar to Ab1-133                                                                                       | RGD1306344           | 0.845 | 0.589 | 0.358 | 0.003 | 1.084 | 0.095 | 0.641 | 0.086 |
| 1382354_at   | BE099884 | Similar to Ab2-008                                                                                       | RGD1305133           | 1.312 | 0.007 | 1.032 | 0.886 | 1.264 | 0.384 | 1.010 | 0.920 |
| 1376676_a_at | BI296154 | similar to Ab2-008                                                                                       | RGD1305133           | 0.888 | 0.181 | 0.960 | 0.513 | 0.856 | 0.334 | 0.877 | 0.879 |
| 1395616_at   | BE116128 | similar to Ab2-008                                                                                       | RGD1305133           | 0.848 | 0.299 | 1.106 | 0.111 | 0.772 | 0.411 | 0.957 | 0.838 |
| 1398522_at   | BM386512 | similar to Ab2-034                                                                                       | RGD1310191           | 0.851 | 0.166 | 0.899 | 0.040 | 0.868 | 0.289 | 0.733 | 0.059 |
| 1392087_at   | AI227607 | Similar to Ab2-034                                                                                       | RGD1310191           | 1.197 | 0.373 | 1.312 | 0.699 | 0.791 | 0.495 | 1.008 | 0.250 |
| 1393450_at   | BI292896 | Similar to Ab2-034                                                                                       | RGD1310191           | 0.974 | 0.437 | 0.876 | 0.152 | 0.896 | 0.128 | 0.866 | 0.353 |
| 1389199_at   | AI407536 | Similar to Ab2-095                                                                                       | RGD1309079           | 0.840 | 0.316 | 1.831 | 0.038 | 0.924 | 0.792 | 1.861 | 0.001 |
| 1371394_x_at | BG664827 | similar to Ab2-143 (predicted)                                                                           | RGD1561927_predicted | 0.939 | 0.752 | 1.085 | 0.142 | 1.154 | 0.160 | 1.151 | 0.194 |
| 1372372_at   | BG372437 | similar to Ab2-225                                                                                       | RGD1306952           | 0.419 | 0.069 | 0.675 | 0.013 | 0.422 | 0.013 | 0.632 | 0.002 |
| 1396103_at   | BF556107 | similar to Ab2-225                                                                                       | RGD1306952           | 0.763 | 0.583 | 0.309 | 0.042 | 0.918 | 0.858 | 0.375 | 0.028 |
| 1373144_at   | BM388977 | similar to Ac2-125 (predicted)                                                                           | RGD1563733_predicted | 1.281 | 0.417 | 1.286 | 0.923 | 0.693 | 0.485 | 1.374 | 0.030 |
| 1392482_at   | BF409567 | similar to actin filament associated protein; actin filament-associated protein, 110 kDa (predicted)     | RGD1311580_predicted | 3.751 | 0.003 | 1.558 | 0.019 | 1.408 | 0.448 | 1.358 | 0.282 |
| 1398206_at   | BE109223 | Similar to actin filament associated protein; actin filament-associated protein, 110 kDa (predicted)     | RGD1311580_predicted | 2.214 | 0.004 | 1.177 | 0.569 | 1.246 | 0.049 | 0.970 | 0.613 |
| 1373181_at   | BE101285 | Similar to actin filament associated protein; actin filament-associated protein, 110 kDa (predicted)     | RGD1311580_predicted | 1.001 | 0.982 | 0.999 | 0.984 | 1.008 | 0.955 | 1.049 | 0.959 |
| 1385315_at   | AI145941 | Similar to actin monomer-binding protein (predicted)                                                     | RGD1309731_predicted | 0.995 | 0.927 | 1.641 | 0.082 | 1.002 | 0.975 | 0.967 | 0.983 |
| 1375641_at   | BI296526 | similar to actin related protein 2/3 complex, subunit 5-like (predicted)                                 | RGD1560362_predicted | 0.821 | 0.366 | 2.723 | 0.020 | 0.625 | 0.062 | 2.790 | 0.007 |
| 1383704_at   | BF410844 | similar to actin-related protein 3-beta (predicted)                                                      | RGD1565759_predicted | 0.980 | 0.830 | 0.983 | 0.953 | 1.002 | 0.947 | 1.017 | 0.336 |
| 1391421_at   | AI599819 | similar to Acyl-CoA dehydrogenase family member 8, mitochondrial precursor (ACAD-8) (predicted)          | RGD1564209_predicted | 1.363 | 0.081 | 0.930 | 0.710 | 1.349 | 0.215 | 1.264 | 0.840 |
| 1379262_at   | AW525769 | similar to acyl-CoA thioesterase                                                                         | LOC302640            | 1.907 | 0.156 | 1.549 | 0.288 | 1.423 | 0.140 | 1.790 | 0.689 |
| 1386571_at   | BF567145 | similar to adaptor molecule SRCASM (predicted)                                                           | RGD1562626_predicted | 2.042 | 0.101 | 1.872 | 0.138 | 1.963 | 0.077 | 1.584 | 0.039 |
| 1398474_at   | BI300593 | Similar to Adenosine deaminase CGI1994-PA                                                                | LOC311352            | 0.400 | 0.046 | 0.293 | 0.000 | 0.548 | 0.022 | 0.384 | 0.040 |
| 1377498_at   | BE100752 | similar to adenosine monophosphate deaminase 2 (isoform L)                                               | LOC362015            | 0.173 | 0.014 | 0.353 | 0.086 | 0.854 | 0.498 | 0.419 | 0.021 |
| 1372782_a_at | BE111787 | similar to adenosine monophosphate deaminase 2 (isoform L)                                               | LOC362015            | 0.604 | 0.029 | 0.444 | 0.002 | 0.678 | 0.260 | 0.501 | 0.001 |
| 1399003_at   | BE116554 | similar to adipocyte-specific protein 4                                                                  | RGD1308813           | 0.887 | 0.277 | 0.823 | 0.138 | 0.831 | 0.747 | 0.733 | 0.048 |
| 1388981_at   | AI104127 | similar to ADP-ribosylation factor GTPase-activating protein 3 (ARF GAP 3)                               | LOC503165            | 1.022 | 0.611 | 1.610 | 0.001 | 0.947 | 0.644 | 1.174 | 0.023 |
| 1371733_at   | BG667965 | similar to ADP-ribosylation factor-like 10B (predicted)                                                  | RGD1565940_predicted | 1.075 | 0.722 | 1.526 | 0.030 | 1.231 | 0.067 | 1.719 | 0.024 |
| 1397815_at   | BG671292 | similar to ADP-ribosylation factor-like 10C                                                              | LOC500282            | 1.721 | 0.746 | 3.316 | 0.014 | 1.387 | 0.722 | 2.216 | 0.077 |
| 1384157_at   | AW916872 | similar to ADP-ribosylation factor-like 10C                                                              | LOC500282            | 0.615 | 0.820 | 2.436 | 0.042 | 0.629 | 0.395 | 2.038 | 0.082 |
| 1373133_at   | BF410786 | similar to ADP-ribosylation factor-like 10C                                                              | LOC500282            | 0.971 | 0.885 | 1.437 | 0.010 | 0.903 | 0.687 | 1.352 | 0.011 |
| 1377110_at   | BF420720 | similar to ADP-ribosylation-like factor 12 protein (predicted)                                           | RGD1563128_predicted | 1.004 | 0.994 | 1.010 | 0.400 | 3.565 | 0.035 | 0.993 | 0.488 |
| 1379005_at   | AI555974 | similar to ADP-ribosylation-like factor 6-interacting protein 6                                          | LOC499798            | 0.906 | 0.524 | 0.970 | 0.749 | 1.163 | 0.756 | 1.019 | 0.413 |

|              |          |                                                                                                                                                                                  |                                       |        |       |       |       |        |       |        |       |
|--------------|----------|----------------------------------------------------------------------------------------------------------------------------------------------------------------------------------|---------------------------------------|--------|-------|-------|-------|--------|-------|--------|-------|
| 1397607_at   | AI176987 | similar to adult retina protein (predicted)                                                                                                                                      | RGD1310862_predicted                  | 1.082  | 0.691 | 1.372 | 0.074 | 1.009  | 0.874 | 0.996  | 0.991 |
| 1372316_at   | BM384131 | similar to AI15348 protein (predicted)                                                                                                                                           | RGD1311939_predicted                  | 3.243  | 0.000 | 0.743 | 0.039 | 3.039  | 0.000 | 1.124  | 0.888 |
| 1389208_at   | AA944562 | similar to AI448196 protein (predicted)                                                                                                                                          | RGD1561477_predicted                  | 1.196  | 0.561 | 0.424 | 0.004 | 1.086  | 0.256 | 0.558  | 0.189 |
| 1380156_at   | BF396185 | Similar to AI661453 protein (predicted)                                                                                                                                          | RGD1561662_predicted                  | 0.692  | 0.020 | 0.352 | 0.013 | 0.408  | 0.004 | 0.385  | 0.036 |
| 1376304_at   | AI716243 | Similar to AI661453 protein (predicted)                                                                                                                                          | RGD1561662_predicted                  | 0.404  | 0.339 | 0.824 | 0.467 | 0.405  | 0.009 | 0.859  | 0.413 |
| 1391298_at   | BF416081 | Similar to Aig1 protein (predicted)                                                                                                                                              | RGD1562920_predicted                  | 0.908  | 0.617 | 0.973 | 0.753 | 0.911  | 0.615 | 0.974  | 0.782 |
| 1375845_at   | BI290029 | similar to Aig1 protein (predicted)                                                                                                                                              | RGD1562920_predicted                  | 0.902  | 0.878 | 0.770 | 0.010 | 1.018  | 0.900 | 0.765  | 0.037 |
| 1381824_at   | AI602689 | Similar to Aig1 protein (predicted)                                                                                                                                              | RGD1562920_predicted                  | 1.013  | 0.884 | 0.956 | 0.831 | 0.973  | 0.961 | 0.872  | 0.502 |
| 1380022_at   | BE119114 | similar to AL023001 protein (predicted)                                                                                                                                          | RGD1305001_predicted                  | 1.094  | 0.568 | 1.251 | 0.077 | 0.618  | 0.206 | 1.312  | 0.378 |
| 1382179_at   | AW534743 | similar to alcohol dehydrogenase PAN2 (predicted)                                                                                                                                | RGD1565196_predicted                  | 0.672  | 0.163 | 0.924 | 0.382 | 0.967  | 0.298 | 1.039  | 0.342 |
| 1386718_at   | BF566188 | similar to aldo-keto reductase family 1, member C12 (predicted)                                                                                                                  | RGD1562954_predicted                  | 0.913  | 0.144 | 0.568 | 0.096 | 0.537  | 0.191 | 0.705  | 0.091 |
| 1373958_at   | AA943149 | similar to ALEX3 protein                                                                                                                                                         | LOC367902                             | 0.772  | 0.587 | 1.347 | 0.175 | 0.714  | 0.010 | 1.390  | 0.302 |
| 1392799_at   | AI013895 | similar to Alkaline phytoceramidase (aPHC) (Alkaline ceramidase) (predicted)                                                                                                     | RGD1561254_predicted                  | 1.214  | 0.331 | 0.669 | 0.035 | 1.307  | 0.136 | 0.774  | 0.189 |
| 1395587_at   | BF389646 | Similar to Alkaline phytoceramidase (aPHC) (Alkaline ceramidase) (predicted)                                                                                                     | RGD1561254_predicted                  | 1.036  | 0.952 | 1.159 | 0.242 | 1.003  | 0.901 | 0.998  | 0.767 |
| 1393701_at   | BF397095 | similar to Alpha-1,4-N-acetylglucosaminyltransferase (Alpha4GnT) (predicted)                                                                                                     | RGD1310265_predicted                  | 1.186  | 0.345 | 1.378 | 0.136 | 0.972  | 0.906 | 1.106  | 0.146 |
| 1392184_at   | BI298049 | Similar to ALS2CR12 gene product                                                                                                                                                 | LOC316413                             | 2.198  | 0.010 | 0.923 | 0.685 | 1.710  | 0.011 | 1.278  | 0.019 |
| 1376678_at   | BF283712 | similar to amyloid beta (A4) precursor protein-binding, family B, member 2 (predicted)                                                                                           | RGD1562438_predicted                  | 0.467  | 0.067 | 0.860 | 0.303 | 0.423  | 0.033 | 0.707  | 0.048 |
| 1378248_at   | BE110453 | Similar to amyloid beta (A4) precursor protein-binding, family B, member 2 (predicted)                                                                                           | RGD1562438_predicted                  | 0.936  | 0.479 | 0.369 | 0.011 | 0.717  | 0.017 | 0.510  | 0.103 |
| 1395717_at   | BF394620 | Similar to amyloid beta (A4) precursor protein-binding, family B, member 2 (predicted)                                                                                           | RGD1562438_predicted                  | 1.016  | 0.641 | 0.315 | 0.013 | 2.187  | 0.114 | 0.792  | 0.113 |
| 1377697_at   | BI275738 | Similar to amyloid beta (A4) precursor protein-binding, family B, member 2 (predicted)                                                                                           | RGD1562438_predicted                  | 1.259  | 0.855 | 0.294 | 0.000 | 0.988  | 0.917 | 0.462  | 0.007 |
| 1389307_at   | AW435479 | similar to Amyloid beta (A4) precursor-like protein 1 (predicted)                                                                                                                | RGD1561211_predicted                  | 0.639  | 0.666 | 0.370 | 0.005 | 0.758  | 0.109 | 0.353  | 0.012 |
| 1367482_at   | AI172459 | similar to anaphase promoting complex subunit 11 homolog (predicted)                                                                                                             | RGD1561880_predicted                  | 0.949  | 0.318 | 1.802 | 0.061 | 0.651  | 0.096 | 1.425  | 0.483 |
| 1389281_at   | BE116601 | Similar to ankyrin repeat domain 25 (predicted)                                                                                                                                  | RGD1563532_predicted                  | 1.072  | 0.560 | 0.291 | 0.008 | 1.043  | 0.675 | 0.463  | 0.018 |
| 1367488_at   | BM386411 | similar to ankyrin repeat domain protein 17 isoform b (predicted)                                                                                                                | RGD1562348_predicted                  | 1.316  | 0.006 | 1.148 | 0.045 | 1.146  | 0.104 | 1.153  | 0.431 |
| 1392723_at   | BF388065 | Similar to ankyrin repeat domain protein 17 isoform b (predicted)                                                                                                                | RGD1562348_predicted                  | 1.033  | 0.166 | 1.054 | 0.469 | 0.797  | 0.234 | 1.002  | 0.994 |
| 1399008_at   | AW434064 | similar to ankyrin repeat domain protein 17 isoform b (predicted)                                                                                                                | RGD1562348_predicted                  | 0.887  | 0.715 | 0.763 | 0.060 | 0.830  | 0.482 | 0.871  | 0.185 |
| 1391416_at   | BE117929 | similar to ankyrin repeat domain protein 17 isoform b (predicted)                                                                                                                | RGD1562348_predicted                  | 0.930  | 0.956 | 1.081 | 0.822 | 1.030  | 0.493 | 1.166  | 0.032 |
| 1398432_at   | AI236704 | similar to Ankyrin repeat domain protein 28 (predicted)                                                                                                                          | RGD1559931_predicted                  | 0.971  | 0.903 | 1.710 | 0.030 | 0.719  | 0.028 | 1.623  | 0.268 |
| 1381223_at   | BG372869 | similar to Annexin A9 (Annexin 31) (Annexin XXXI) (predicted)                                                                                                                    | RGD1560197_predicted                  | 0.958  | 0.071 | 0.859 | 0.485 | 0.955  | 0.800 | 0.862  | 0.452 |
| 1372007_at   | BE099064 | similar to AOF2 protein (predicted)                                                                                                                                              | RGD1562975_predicted                  | 1.026  | 0.828 | 1.058 | 0.428 | 0.685  | 0.148 | 0.861  | 0.762 |
| 1372348_at   | AI104502 | Similar to AP2 associated kinase 1 (predicted)                                                                                                                                   | RGD1563580_predicted                  | 0.729  | 0.134 | 0.469 | 0.010 | 0.666  | 0.041 | 0.570  | 0.022 |
| 1379948_at   | BM392001 | Similar to AP2 associated kinase 1 (predicted)                                                                                                                                   | RGD1563580_predicted                  | 0.668  | 0.395 | 0.687 | 0.863 | 0.824  | 0.345 | 0.820  | 0.231 |
| 1377939_at   | AW527217 | Similar to APG4 autophagy 4 homolog C                                                                                                                                            | LOC313391                             | 1.008  | 0.141 | 1.117 | 0.722 | 1.358  | 0.147 | 0.973  | 0.520 |
| 1378968_at   | BI289975 | similar to Apoptosis facilitator Bcl-2-like protein 14                                                                                                                           | LOC500348                             | 1.001  | 0.448 | 1.001 | 0.992 | 1.046  | 0.587 | 0.999  | 0.893 |
| 1371807_at   | BE110607 | similar to apoptosis related protein APR-3; p18 protein (predicted)                                                                                                              | RGD1311605_predicted                  | 0.432  | 0.183 | 0.293 | 0.003 | 0.545  | 0.002 | 0.342  | 0.011 |
| 1394727_at   | AI407942 | Similar to ARG99 homolog (predicted)                                                                                                                                             | RGD1564868_predicted                  | 1.313  | 0.857 | 1.859 | 0.416 | 1.077  | 0.569 | 1.707  | 0.242 |
| 1382461_at   | AI101582 | similar to arginine N-methyltransferase p82 isoform (predicted)                                                                                                                  | RGD1304869_predicted                  | 0.989  | 0.838 | 2.361 | 0.108 | 0.958  | 0.030 | 1.111  | 0.568 |
| 1374018_at   | AA851212 | similar to ASC-1 complex subunit P100 (predicted)                                                                                                                                | RGD1561422_predicted                  | 0.840  | 0.050 | 2.584 | 0.165 | 0.781  | 0.158 | 1.674  | 0.161 |
| 1391959_at   | BM387121 | Similar to AT motif-binding factor (predicted)                                                                                                                                   | RGD1560268_predicted                  | 1.894  | 0.229 | 0.914 | 0.359 | 1.149  | 0.458 | 0.838  | 0.320 |
| 1377961_at   | AI072467 | similar to AT motif-binding factor (predicted)                                                                                                                                   | RGD1560268_predicted                  | 0.991  | 0.479 | 2.555 | 0.072 | 1.656  | 0.394 | 1.012  | 0.941 |
| 1390118_at   | BI274651 | similar to ATP/GTP-binding protein                                                                                                                                               | RGD1307679                            | 1.739  | 0.317 | 1.124 | 0.771 | 1.058  | 0.114 | 0.877  | 0.947 |
| 1379717_at   | BM385804 | similar to ATP-binding cassette transporter ABCG3 /// similar to ATP-binding cassette, sub-family G (WHITE), member 3 /// similar to ATP-binding cassette, subfamily G, member 3 | LOC360910 /// LOC360997 /// LOC498435 | 13.559 | 0.000 | 6.371 | 0.000 | 20.037 | 0.000 | 11.525 | 0.000 |
| 1388864_at   | BI276976 | similar to ATP-dependent RNA-helicase (predicted)                                                                                                                                | RGD1562539_predicted                  | 1.078  | 0.565 | 2.268 | 0.005 | 1.079  | 0.899 | 2.049  | 0.025 |
| 1388829_at   | AA946348 | similar to autoantigen                                                                                                                                                           | LOC361399                             | 1.271  | 0.086 | 1.563 | 0.023 | 1.013  | 0.132 | 1.158  | 0.025 |
| 1396878_at   | AW528235 | similar to autophagy 5-like                                                                                                                                                      | LOC365601                             | 0.576  | 0.316 | 1.074 | 0.154 | 1.557  | 0.241 | 0.919  | 0.382 |
| 1373526_at   | AI105153 | similar to autophagy 5-like                                                                                                                                                      | LOC365601                             | 1.001  | 0.407 | 1.245 | 0.166 | 1.006  | 0.886 | 1.091  | 0.146 |
| 1385526_at   | AA956721 | similar to autophagy 5-like                                                                                                                                                      | LOC365601                             | 0.999  | 0.798 | 2.100 | 0.015 | 0.810  | 0.203 | 1.784  | 0.001 |
| 1376160_at   | BF408850 | similar to Avian reticuloendotheliosis viral (v-rel) oncogene related B                                                                                                          | LOC365510                             | 5.472  | 0.002 | 2.633 | 0.001 | 10.969 | 0.003 | 6.250  | 0.005 |
| 1377417_at   | BE099931 | similar to AW046014 protein                                                                                                                                                      | LOC363328                             | 0.700  | 0.278 | 0.751 | 0.462 | 0.729  | 0.084 | 0.848  | 0.486 |
| 1386081_at   | AA800678 | similar to AW046014 protein                                                                                                                                                      | LOC363328                             | 0.981  | 0.926 | 1.084 | 0.847 | 0.976  | 0.891 | 1.001  | 0.991 |
| 1374455_at   | AI599343 | similar to AYP1 (predicted)                                                                                                                                                      | RGD1310634_predicted                  | 0.992  | 0.348 | 0.811 | 0.287 | 0.918  | 0.124 | 0.818  | 0.296 |
| 1395519_at   | BG670960 | similar to B230212L03Rik protein                                                                                                                                                 | MGC95152                              | 1.055  | 0.459 | 0.421 | 0.041 | 0.917  | 0.971 | 0.423  | 0.042 |
| 1374558_at   | AI010316 | Similar to B7-like protein GL50-B (predicted)                                                                                                                                    | RGD1562791_predicted                  | 1.142  | 0.362 | 1.364 | 0.188 | 1.141  | 0.986 | 0.419  | 0.020 |
| 1381804_at   | BI293313 | Similar to BAZF (predicted)                                                                                                                                                      | RGD1563179_predicted                  | 0.824  | 0.042 | 0.142 | 0.018 | 2.316  | 0.051 | 0.259  | 0.004 |
| 1394375_x_at | BF554138 | Similar to BAZF (predicted)                                                                                                                                                      | RGD1563179_predicted                  | 1.291  | 0.374 | 0.115 | 0.001 | 1.229  | 0.988 | 0.284  | 0.004 |
| 1386833_at   | BF554138 | Similar to BAZF (predicted)                                                                                                                                                      | RGD1563179_predicted                  | 1.275  | 0.549 | 0.206 | 0.005 | 0.967  | 0.721 | 0.395  | 0.036 |
| 1386832_a_at | BF554138 | Similar to BAZF (predicted)                                                                                                                                                      | RGD1563179_predicted                  | 1.226  | 0.617 | 0.078 | 0.000 | 0.696  | 0.114 | 0.075  | 0.026 |
| 1396112_at   | BF408519 | similar to BB128963 protein                                                                                                                                                      | RGD1305958                            | 0.995  | 0.431 | 0.750 | 0.053 | 0.970  | 0.938 | 0.595  | 0.067 |
| 1372117_at   | BE329026 | similar to BB128963 protein                                                                                                                                                      | RGD1305958                            | 0.433  | 0.438 | 0.450 | 0.005 | 0.381  | 0.142 | 0.617  | 0.080 |
| 1391437_at   | AA874995 | similar to BC002216 protein                                                                                                                                                      | MGC94339                              | 0.417  | 0.686 | 0.875 | 0.541 | 0.558  | 0.142 | 0.850  | 0.315 |

|              |          |                                                                                                                                                |                      |        |       |        |       |         |       |         |       |
|--------------|----------|------------------------------------------------------------------------------------------------------------------------------------------------|----------------------|--------|-------|--------|-------|---------|-------|---------|-------|
| 1383314_at   | BE110098 | Similar to BC003277 protein (predicted)                                                                                                        | RGD1565452_predicted | 1.113  | 0.764 | 0.902  | 0.537 | 0.756   | 0.710 | 0.678   | 0.147 |
| 1388407_at   | AI008077 | similar to BC003940 protein (predicted)                                                                                                        | RGD1311925_predicted | 1.122  | 0.646 | 2.929  | 0.003 | 1.105   | 0.963 | 2.801   | 0.008 |
| 1381556_at   | BI303853 | Similar to BC013672 protein                                                                                                                    | LOC498673            | 79.298 | 0.001 | 16.384 | 0.009 | 255.873 | 0.001 | 103.428 | 0.003 |
| 1381847_at   | AI137632 | Similar to BC021442 protein (predicted)                                                                                                        | RGD1561413_predicted | 1.194  | 0.586 | 1.273  | 0.031 | 1.819   | 0.626 | 1.076   | 0.932 |
| 1375854_at   | AI175992 | similar to beta-catenin-interacting protein ICAT                                                                                               | LOC503000            | 0.525  | 0.063 | 1.249  | 0.137 | 0.296   | 0.005 | 0.683   | 0.142 |
| 1373279_at   | BI275726 | similar to beta-catenin-interacting protein ICAT                                                                                               | LOC503000            | 0.726  | 0.234 | 0.309  | 0.009 | 0.670   | 0.175 | 0.369   | 0.003 |
| 1392670_at   | BF291168 | Similar to BH3-only member B protein (predicted)                                                                                               | RGD1559427_predicted | 1.169  | 0.140 | 0.736  | 0.237 | 1.441   | 0.224 | 0.798   | 0.635 |
| 1385783_at   | BF418697 | similar to BH3-only member B protein (predicted)                                                                                               | RGD1559427_predicted | 0.999  | 0.520 | 0.878  | 0.328 | 1.048   | 0.856 | 0.979   | 0.940 |
| 1374361_at   | BI276503 | Similar to bK1191B2.3.1 (PUTATIVE novel Acyl Transferase similar to C. elegans C50D2.7) (variant 1) (predicted)                                | RGD1306698_predicted | 0.999  | 0.674 | 0.801  | 0.383 | 1.000   | 0.999 | 0.772   | 0.382 |
| 1377860_at   | BM392227 | similar to bM410K19.2.2 (novel protein similar to extra-cellular matrix proteins and chondroitin sulfate proteoglycans, variant 2) (predicted) | RGD1306981_predicted | 5.105  | 0.013 | 5.877  | 0.002 | 8.295   | 0.020 | 4.351   | 0.002 |
| 1385445_at   | BE119167 | Similar to bM410K19.2.2 (novel protein similar to extra-cellular matrix proteins and chondroitin sulfate proteoglycans, variant 2) (predicted) | RGD1306981_predicted | 4.060  | 0.038 | 2.486  | 0.001 | 6.282   | 0.023 | 2.163   | 0.002 |
| 1379659_at   | BF284068 | similar to BMP-2 inducible kinase                                                                                                              | LOC289485            | 1.962  | 0.199 | 1.871  | 0.026 | 0.846   | 0.454 | 1.558   | 0.087 |
| 1388976_at   | AI178272 | similar to BolA domain-containing protein like (11.4 kD) (1P25) (predicted)                                                                    | RGD1305975_predicted | 0.438  | 0.226 | 0.371  | 0.025 | 0.482   | 0.025 | 0.438   | 0.062 |
| 1382467_at   | C07140   | similar to brain expressed X-linked protein 2                                                                                                  | LOC363498            | 0.495  | 0.001 | 0.731  | 0.126 | 0.548   | 0.005 | 0.595   | 0.127 |
| 1394299_at   | BG669326 | similar to brain expressed X-linked protein 2                                                                                                  | LOC363498            | 0.344  | 0.274 | 0.585  | 0.092 | 0.434   | 0.427 | 0.579   | 0.096 |
| 1371379_at   | AI011738 | similar to Brain protein 44 (predicted)                                                                                                        | RGD1563422_predicted | 0.573  | 0.570 | 0.709  | 0.063 | 0.553   | 0.174 | 0.812   | 0.269 |
| 1378825_a_at | AI011101 | Similar to brain specific protein 4 (predicted)                                                                                                | RGD1560320_predicted | 1.172  | 0.893 | 0.949  | 0.335 | 1.454   | 0.609 | 0.860   | 0.437 |
| 1394782_at   | AI547795 | similar to brain-muscle-ARNT-like protein 2c                                                                                                   | LOC362464            | 1.023  | 0.486 | 1.010  | 0.763 | 1.043   | 0.626 | 1.009   | 0.225 |
| 1388639_at   | BF284148 | Similar to Breast carcinoma amplified sequence 3 homolog (K20D4) (predicted)                                                                   | RGD1560788_predicted | 0.993  | 0.653 | 0.517  | 0.027 | 0.998   | 0.941 | 0.461   | 0.011 |
| 1396110_at   | BE107839 | Similar to Breast carcinoma amplified sequence 3 homolog (K20D4) (predicted)                                                                   | RGD1560788_predicted | 0.999  | 0.737 | 0.838  | 0.370 | 1.104   | 0.737 | 0.921   | 0.633 |
| 1377801_at   | AI237031 | Similar to BTB (PO)Z domain containing 12 (predicted)                                                                                          | RGD1566009_predicted | 1.330  | 0.607 | 0.859  | 0.668 | 1.234   | 0.977 | 1.268   | 0.747 |
| 1375177_at   | AI454932 | similar to BTEB3 protein (predicted)                                                                                                           | RGD1565099_predicted | 1.000  | 0.999 | 1.036  | 0.660 | 1.003   | 0.963 | 1.000   | 0.217 |
| 1376888_a_at | AI501092 | similar to Btk-PH-domain binding protein                                                                                                       | LOC301119            | 0.998  | 0.065 | 1.016  | 0.702 | 1.083   | 0.763 | 1.020   | 0.098 |
| 1392122_x_at | BF559040 | similar to Btk-PH-domain binding protein                                                                                                       | LOC301119            | 1.003  | 0.188 | 1.028  | 0.674 | 1.029   | 0.454 | 0.989   | 0.888 |
| 1383587_at   | BF283779 | similar to Butyrate-induced transcript 1 (predicted)                                                                                           | RGD1565496_predicted | 0.258  | 0.017 | 0.508  | 0.017 | 0.222   | 0.006 | 0.631   | 0.108 |
| 1371547_at   | BI282112 | similar to C10 (predicted)                                                                                                                     | RGD1309695_predicted | 0.705  | 0.310 | 0.763  | 0.504 | 0.501   | 0.026 | 0.713   | 0.672 |
| 1383175_a_at | BF561368 | similar to C11orf17 protein (predicted)                                                                                                        | RGD1306959_predicted | 1.020  | 0.200 | 1.935  | 0.055 | 0.886   | 0.075 | 2.055   | 0.043 |
| 1385458_a_at | AA799992 | similar to C11orf17 protein (predicted)                                                                                                        | RGD1306959_predicted | 1.055  | 0.523 | 1.518  | 0.067 | 0.684   | 0.125 | 1.604   | 0.056 |
| 1392938_s_at | BF561368 | similar to C11orf17 protein (predicted)                                                                                                        | RGD1306959_predicted | 1.151  | 0.621 | 1.273  | 0.420 | 1.009   | 0.803 | 1.733   | 0.002 |
| 1383176_at   | BF561368 | similar to C11orf17 protein (predicted)                                                                                                        | RGD1306959_predicted | 0.908  | 0.883 | 2.188  | 0.011 | 0.884   | 0.142 | 1.914   | 0.169 |
| 1380827_at   | AA819867 | similar to C1orf25                                                                                                                             | RGD1307890           | 1.918  | 0.134 | 0.794  | 0.424 | 1.400   | 0.029 | 0.816   | 0.036 |
| 1377601_at   | BM386514 | similar to C21orf70 protein                                                                                                                    | RGD1311257           | 0.834  | 0.277 | 1.053  | 0.579 | 0.758   | 0.291 | 1.003   | 0.913 |
| 1380449_at   | AI112513 | Similar to C230080I20Rik protein (predicted)                                                                                                   | RGD1560924_predicted | 0.623  | 0.016 | 0.457  | 0.003 | 0.443   | 0.049 | 0.627   | 0.064 |
| 1395423_at   | AW920217 | Similar to C230080I20Rik protein (predicted)                                                                                                   | RGD1560924_predicted | 0.865  | 0.347 | 0.435  | 0.009 | 0.406   | 0.032 | 0.482   | 0.025 |
| 1379615_at   | AI011501 | similar to C230080I20Rik protein (predicted)                                                                                                   | RGD1560924_predicted | 1.184  | 0.632 | 0.808  | 0.987 | 0.517   | 0.789 | 1.116   | 0.930 |
| 1373924_at   | AI712686 | similar to C530044N13Rik protein                                                                                                               | RGD1306568           | 0.389  | 0.005 | 0.358  | 0.001 | 0.245   | 0.001 | 0.563   | 0.046 |
| 1397277_at   | AW920086 | Similar to C630007L23Rik protein (predicted)                                                                                                   | RGD1562190_predicted | 0.592  | 0.062 | 1.243  | 0.603 | 1.012   | 0.076 | 1.004   | 0.983 |
| 1382340_at   | AA924048 | similar to C630007L23Rik protein (predicted)                                                                                                   | RGD1562190_predicted | 1.284  | 0.209 | 1.150  | 0.655 | 1.771   | 0.034 | 0.907   | 0.621 |
| 1390865_at   | AW524822 | similar to Ca2+-dependent activator for secretion protein 2 (predicted)                                                                        | RGD1559440_predicted | 2.193  | 0.474 | 2.322  | 0.027 | 3.826   | 0.013 | 2.554   | 0.009 |
| 1377030_at   | BF390550 | Similar to cajalin 2 isoform a (predicted)                                                                                                     | RGD1565556_predicted | 1.000  | 0.403 | 0.963  | 0.788 | 1.806   | 0.350 | 1.063   | 0.035 |
| 1378159_at   | BF391007 | Similar to cajalin 2 isoform a (predicted)                                                                                                     | RGD1565556_predicted | 1.239  | 0.909 | 0.931  | 0.068 | 1.499   | 0.312 | 0.722   | 0.078 |
| 1380198_at   | BF564882 | Similar to cajalin 2 isoform a (predicted)                                                                                                     | RGD1565556_predicted | 1.031  | 0.932 | 1.005  | 0.918 | 1.094   | 0.387 | 0.999   | 0.995 |
| 1381999_at   | BE096370 | similar to calmodulin regulated spectrin-associated protein 1 (predicted)                                                                      | RGD1565022_predicted | 0.695  | 0.482 | 1.731  | 0.039 | 1.064   | 0.153 | 1.076   | 0.120 |
| 1371622_at   | AA943541 | similar to candidate tumor suppressor OVCA2 (predicted)                                                                                        | RGD1564623_predicted | 0.592  | 0.423 | 1.505  | 0.177 | 0.501   | 0.019 | 0.736   | 0.796 |
| 1377869_at   | BI284261 | similar to carbon catabolite repression 4 protein homolog                                                                                      | LOC310395            | 0.707  | 0.001 | 0.417  | 0.009 | 0.830   | 0.021 | 0.605   | 0.008 |
| 1376726_at   | AI101117 | similar to Carbonic anhydrase-related protein 10 (Carbonic anhydrase-related protein X) (predicted)                                            | RGD1561624_predicted | 0.489  | 0.110 | 0.175  | 0.003 | 0.591   | 0.138 | 0.172   | 0.009 |
| 1398668_at   | BF290204 | Similar to carcinoembryonic antigen-related cell adhesion molecule 1 (biliary glycoprotein) (predicted)                                        | RGD1560536_predicted | 0.997  | 0.985 | 0.893  | 0.113 | 1.003   | 0.935 | 0.899   | 0.122 |
| 1378049_at   | AI603565 | similar to Cas-associated zinc finger protein (predicted)                                                                                      | RGD1306498_predicted | 0.306  | 0.016 | 0.616  | 0.233 | 0.399   | 0.016 | 0.998   | 0.704 |
| 1375968_at   | AI556268 | similar to Catna2 protein (predicted)                                                                                                          | RGD1559632_predicted | 0.970  | 0.099 | 0.308  | 0.114 | 1.131   | 0.625 | 0.458   | 0.041 |
| 1374408_at   | AI410173 | similar to CBF1 interacting corepressor                                                                                                        | RGD1309199           | 1.138  | 0.085 | 0.755  | 0.028 | 1.388   | 0.031 | 0.951   | 0.090 |
| 1386229_at   | AI101392 | similar to CBF1 interacting corepressor                                                                                                        | RGD1309199           | 1.285  | 0.122 | 0.632  | 0.002 | 1.484   | 0.130 | 0.676   | 0.027 |
| 1379603_at   | BE116890 | similar to CBL E3 ubiquitin protein ligase (Signal transduction protein CBL) (predicted)                                                       | RGD1561386_predicted | 1.181  | 0.544 | 1.391  | 0.369 | 1.026   | 0.951 | 0.996   | 0.701 |
| 1378462_at   | BE107396 | Similar to Cc1-6                                                                                                                               | LOC500496            | 1.411  | 0.477 | 1.577  | 0.200 | 1.840   | 0.047 | 1.440   | 0.043 |
| 1383152_at   | BF544427 | similar to Cc1-9                                                                                                                               | RGD1308955           | 0.623  | 0.088 | 0.725  | 0.035 | 0.751   | 0.005 | 0.414   | 0.018 |
| 1382509_at   | AA956256 | similar to CCR4                                                                                                                                | RGD1310783           | 1.086  | 0.038 | 0.872  | 0.251 | 0.999   | 0.310 | 0.941   | 0.330 |
| 1371302_at   | AI406651 | Similar to Cdc21I protein                                                                                                                      | LOC502663            | 0.785  | 0.534 | 0.711  | 0.042 | 0.574   | 0.059 | 0.556   | 0.055 |
| 1374547_at   | BI285509 | Similar to Cdc21I protein                                                                                                                      | LOC502663            | 0.928  | 0.625 | 0.588  | 0.063 | 0.995   | 0.767 | 0.589   | 0.069 |
| 1388448_at   | AI235065 | Similar to CDC42 small effector 2 (predicted)                                                                                                  | RGD1565337_predicted | 1.917  | 0.141 | 2.609  | 0.005 | 2.382   | 0.158 | 2.663   | 0.007 |



|              |          |                                                                                                                                                 |                             |        |       |        |       |        |       |        |       |
|--------------|----------|-------------------------------------------------------------------------------------------------------------------------------------------------|-----------------------------|--------|-------|--------|-------|--------|-------|--------|-------|
| 1382653_at   | AI136405 | similar to CG15929-PA (predicted)                                                                                                               | RGD1306798_predicted        | 1.030  | 0.553 | 0.920  | 0.443 | 1.518  | 0.211 | 0.809  | 0.975 |
| 1378841_at   | AA899057 | Similar to CG16812-PA (predicted)                                                                                                               | RGD1307554_predicted        | 1.146  | 0.280 | 0.883  | 0.218 | 0.783  | 0.067 | 1.014  | 0.934 |
| 1389644_at   | BI289857 | similar to CG16896-PA                                                                                                                           | LOC299949                   | 0.330  | 0.001 | 0.964  | 0.865 | 0.359  | 0.017 | 0.678  | 0.038 |
| 1372636_at   | AI007924 | Similar to CG18661-PA                                                                                                                           | RGD1307155                  | 1.327  | 0.246 | 2.373  | 0.000 | 0.973  | 0.618 | 1.372  | 0.058 |
| 1377524_at   | AI044320 | similar to CG18661-PA (predicted)                                                                                                               | RGD1566003_predicted        | 0.429  | 0.026 | 0.643  | 0.160 | 0.391  | 0.005 | 0.791  | 0.384 |
| 1372698_at   | BI275970 | similar to CG2662-PA (predicted)                                                                                                                | RGD1305094_predicted        | 0.598  | 0.084 | 0.951  | 0.484 | 0.710  | 0.071 | 0.745  | 0.079 |
| 1374840_at   | BG377716 | Similar to CG2919-PA (predicted)                                                                                                                | RGD1305604_predicted        | 0.990  | 0.338 | 1.000  | 0.996 | 1.112  | 0.078 | 0.980  | 0.937 |
| 1372086_at   | BM387251 | similar to CG32384-PA (predicted)                                                                                                               | RGD1311955_predicted        | 1.878  | 0.032 | 8.649  | 0.002 | 0.545  | 0.027 | 4.498  | 0.010 |
| 1398998_at   | AI407273 | similar to CG4768-PA (predicted)                                                                                                                | RGD1309748_predicted        | 2.232  | 0.002 | 2.198  | 0.001 | 1.201  | 0.184 | 1.812  | 0.007 |
| 1391069_at   | AI231713 | Similar to CG4768-PA (predicted)                                                                                                                | RGD1309748_predicted        | 1.509  | 0.005 | 2.269  | 0.003 | 1.508  | 0.107 | 2.786  | 0.052 |
| 1378098_at   | AI406802 | Similar to CG4768-PA (predicted)                                                                                                                | RGD1309748_predicted        | 1.265  | 0.060 | 0.590  | 0.008 | 1.064  | 0.711 | 0.890  | 0.893 |
| 1385802_at   | BF418288 | Similar to CG4768-PA (predicted)                                                                                                                | RGD1309748_predicted        | 0.975  | 0.686 | 0.907  | 0.346 | 1.035  | 0.409 | 1.134  | 0.998 |
| 1391325_at   | BF397406 | Similar to CG4768-PA (predicted)                                                                                                                | RGD1309748_predicted        | 1.004  | 0.811 | 0.610  | 0.093 | 0.952  | 0.758 | 0.952  | 0.992 |
| 1397432_at   | BE119690 | similar to CG4854-PA (predicted)                                                                                                                | RGD1307214_predicted        | 1.090  | 0.553 | 1.001  | 0.991 | 0.952  | 0.581 | 0.986  | 0.503 |
| 1371335_at   | AA944393 | similar to CG6105-PA                                                                                                                            | MGC72942                    | 0.714  | 0.972 | 0.970  | 0.469 | 0.441  | 0.027 | 0.674  | 0.265 |
| 1392533_at   | AI716888 | similar to CG6796-PA                                                                                                                            | RGD1305145                  | 0.549  | 0.123 | 0.667  | 0.458 | 0.999  | 0.649 | 0.405  | 0.054 |
| 1374418_at   | BF289188 | similar to CG8009-PA (predicted)                                                                                                                | RGD1308816_predicted        | 1.148  | 0.594 | 0.874  | 0.608 | 0.870  | 0.559 | 1.049  | 0.153 |
| 1390403_at   | BE108405 | similar to CG8312-PA                                                                                                                            | RGD1304790                  | 0.661  | 0.327 | 0.439  | 0.013 | 0.772  | 0.036 | 0.615  | 0.014 |
| 1382261_at   | AW534331 | similar to CG8841-PA (predicted)                                                                                                                | RGD1311422_predicted        | 0.518  | 0.193 | 0.927  | 0.426 | 0.630  | 0.037 | 0.892  | 0.985 |
| 1374898_at   | AW527473 | similar to CG8841-PA (predicted)                                                                                                                | RGD1311422_predicted        | 0.624  | 0.215 | 0.714  | 0.003 | 0.478  | 0.001 | 0.696  | 0.011 |
| 1376718_at   | AI575121 | similar to CG9117-PA                                                                                                                            | RGD1306932                  | 0.696  | 0.104 | 0.452  | 0.006 | 0.506  | 0.003 | 0.575  | 0.190 |
| 1373964_at   | AA818815 | similar to CG9147-PB (predicted)                                                                                                                | RGD1305487_predicted        | 0.878  | 0.176 | 0.574  | 0.005 | 0.848  | 0.089 | 0.657  | 0.026 |
| 1379715_at   | BE115506 | similar to CG9346-PA (predicted)                                                                                                                | RGD1307882_predicted        | 0.780  | 0.013 | 1.468  | 0.061 | 0.827  | 0.023 | 0.732  | 0.498 |
| 1382135_at   | AI012683 | similar to CG9346-PA (predicted)                                                                                                                | RGD1307882_predicted        | 1.319  | 0.040 | 1.656  | 0.016 | 1.150  | 0.078 | 1.492  | 0.053 |
| 1382290_at   | AI717186 | similar to CG9643-PA (predicted)                                                                                                                | RGD1306300_predicted        | 0.556  | 0.087 | 0.800  | 0.230 | 0.694  | 0.058 | 1.264  | 0.077 |
| 1394737_at   | BE108874 | similar to CG9752-PA                                                                                                                            | RGD1311345                  | 0.745  | 0.559 | 1.234  | 0.104 | 0.674  | 0.002 | 1.205  | 1.000 |
| 1382468_at   | AW143385 | similar to CG9752-PA                                                                                                                            | RGD1311345                  | 0.775  | 0.676 | 0.793  | 0.328 | 0.943  | 0.140 | 1.055  | 0.841 |
| 1374136_at   | BG665121 | similar to CG9882-PA (predicted)                                                                                                                | RGD1306157_predicted        | 0.694  | 0.042 | 2.439  | 0.032 | 0.659  | 0.096 | 2.078  | 0.105 |
| 1395577_at   | AA800508 | Similar to CG9882-PA (predicted)                                                                                                                | RGD1306157_predicted        | 1.058  | 0.395 | 0.987  | 0.978 | 1.037  | 0.820 | 1.137  | 0.569 |
| 1373600_at   | AI412518 | Similar to CG9996-PA                                                                                                                            | LOC300173                   | 1.207  | 0.411 | 1.548  | 0.009 | 1.250  | 0.365 | 1.325  | 0.024 |
| 1379649_at   | BF394502 | Similar to CG9996-PA                                                                                                                            | LOC300173                   | 1.003  | 0.800 | 1.209  | 0.081 | 0.665  | 0.077 | 0.980  | 0.625 |
| 1381217_at   | AI639158 | similar to CGI-09 protein (predicted)                                                                                                           | RGD1308877_predicted        | 0.714  | 0.052 | 2.016  | 0.033 | 0.454  | 0.216 | 1.165  | 0.240 |
| 1393443_a_at | AW434918 | similar to CGI-112 protein                                                                                                                      | RGD1308113                  | 0.177  | 0.001 | 0.565  | 0.151 | 0.261  | 0.007 | 0.790  | 0.258 |
| 1367494_at   | AW523764 | similar to CGI-35 protein (predicted)                                                                                                           | RGD1310899_predicted        | 0.962  | 0.697 | 1.135  | 0.448 | 0.922  | 0.164 | 1.214  | 0.030 |
| 1392797_at   | AI045916 | similar to CGI-41 protein                                                                                                                       | RGD1311265                  | 0.677  | 0.204 | 0.999  | 0.948 | 0.842  | 0.464 | 0.772  | 0.158 |
| 1375456_at   | AI007882 | Similar to Cgi67 serine protease precursor                                                                                                      | RGD1305246                  | 1.470  | 0.426 | 1.988  | 0.226 | 0.942  | 0.738 | 1.319  | 0.154 |
| 1373060_at   | AI406281 | similar to CGI-84 protein (predicted)                                                                                                           | RGD1306781_predicted        | 0.915  | 0.330 | 1.352  | 0.941 | 0.689  | 0.325 | 1.478  | 0.670 |
| 1395013_at   | AW531495 | similar to CGI-94 protein (predicted)                                                                                                           | RGD1559610_predicted        | 0.993  | 0.748 | 0.756  | 0.096 | 0.989  | 0.832 | 0.754  | 0.088 |
| 1371722_at   | BI274676 | similar to CGI-96 protein; gastric cancer antigen Zg14                                                                                          | RGD1311547                  | 0.848  | 0.318 | 0.893  | 0.292 | 0.747  | 0.107 | 0.779  | 0.513 |
| 1373948_at   | BG376678 | similar to CGTHBA protein (-14 gene protein)                                                                                                    | RGD1308665                  | 1.032  | 0.445 | 0.692  | 0.033 | 0.939  | 0.860 | 0.813  | 0.295 |
| 1374743_at   | BE115056 | similar to channel-interacting PDZ domain protein isoform 1 (predicted)                                                                         | RGD1564282_predicted        | 1.291  | 0.043 | 2.348  | 0.005 | 1.005  | 0.577 | 1.976  | 0.044 |
| 1372064_at   | BI296385 | similar to chemokine (C-X-C motif) ligand 16                                                                                                    | Cxcl16                      | 15.707 | 0.001 | 17.057 | 0.000 | 19.869 | 0.001 | 24.659 | 0.000 |
| 1381957_at   | AW529176 | Similar to chondroitin sulfate synthase 3 (predicted)                                                                                           | RGD1560819_predicted        | 1.124  | 0.779 | 1.060  | 0.153 | 1.096  | 0.246 | 1.063  | 0.252 |
| 1382460_at   | AI229438 | Similar to chr2 synaptotagmin (predicted)                                                                                                       | RGD1565705_predicted        | 1.008  | 0.989 | 0.712  | 0.006 | 0.916  | 0.621 | 0.672  | 0.152 |
| 1381825_at   | BM385475 | similar to chromosome 1 open reading frame 172                                                                                                  | RGD1303271                  | 0.669  | 0.120 | 0.979  | 0.873 | 0.936  | 0.323 | 0.922  | 0.258 |
| 1398446_at   | BG376030 | similar to chromosome 1 open reading frame 2 (predicted)                                                                                        | RGD1306107_predicted        | 0.536  | 0.003 | 0.464  | 0.001 | 0.795  | 0.055 | 0.618  | 0.138 |
| 1397865_at   | AI138056 | Similar to chromosome 1 open reading frame 51 (predicted)                                                                                       | RGD1559569_predicted        | 1.010  | 0.607 | 0.932  | 0.894 | 2.018  | 0.069 | 1.833  | 0.517 |
| 1398364_at   | BF555972 | similar to chromosome 1 open reading frame 63                                                                                                   | RGD1359529                  | 0.599  | 0.002 | 0.788  | 0.007 | 0.776  | 0.119 | 0.932  | 0.050 |
| 1389204_at   | AI009647 | similar to chromosome 10 open reading frame 18 (predicted)                                                                                      | RGD1564456_predicted        | 1.876  | 0.024 | 1.006  | 0.973 | 1.799  | 0.110 | 1.232  | 0.600 |
| 1379623_at   | AA874896 | similar to chromosome 10 open reading frame 4; similar to putative acid phosphatase F26C11.1 /// similar to FRA10AC1 protein isoform FRA10AC1-1 | RGD1309482 ///<br>LOC499351 | 0.934  | 0.516 | 1.314  | 0.137 | 1.003  | 0.153 | 0.945  | 0.737 |
| 1378987_at   | BE119446 | Similar to chromosome 10 open reading frame 42                                                                                                  | LOC294560                   | 0.446  | 0.051 | 0.854  | 0.510 | 0.325  | 0.014 | 0.717  | 0.054 |
| 1386569_at   | BF563922 | Similar to chromosome 10 open reading frame 42                                                                                                  | LOC294560                   | 0.363  | 0.217 | 0.697  | 0.050 | 0.612  | 0.140 | 0.527  | 0.027 |
| 1383664_a_at | AI172176 | similar to chromosome 11 open reading frame2 (predicted)                                                                                        | RGD1560544_predicted        | 1.226  | 0.119 | 1.132  | 0.448 | 0.997  | 0.655 | 0.774  | 0.099 |
| 1388351_at   | BM384128 | similar to chromosome 13 open reading frame 12 (predicted)                                                                                      | RGD1305831_predicted        | 0.967  | 0.182 | 1.349  | 0.242 | 1.069  | 0.061 | 1.278  | 0.135 |
| 1388739_at   | BF398626 | similar to chromosome 14 open reading frame 130                                                                                                 | RGD1359144                  | 0.700  | 0.012 | 1.377  | 0.006 | 0.438  | 0.008 | 1.058  | 0.066 |
| 1376441_at   | AI102249 | similar to chromosome 14 open reading frame 135 (predicted)                                                                                     | RGD1566114_predicted        | 0.768  | 0.825 | 0.356  | 0.003 | 0.983  | 0.918 | 0.596  | 0.098 |
| 1379406_at   | AA925559 | similar to chromosome 14 open reading frame 21 (predicted)                                                                                      | RGD1308396_predicted        | 0.376  | 0.071 | 1.273  | 0.125 | 0.364  | 0.028 | 1.436  | 0.949 |
| 1398452_at   | BI298587 | similar to chromosome 14 open reading frame 35 (predicted)                                                                                      | RGD1559923_predicted        | 1.198  | 0.090 | 5.845  | 0.000 | 0.801  | 0.948 | 4.794  | 0.018 |
| 1391443_at   | BF289340 | similar to chromosome 14 open reading frame 35 (predicted)                                                                                      | RGD1559923_predicted        | 0.721  | 0.672 | 0.827  | 0.501 | 0.897  | 0.320 | 0.824  | 0.154 |
| 1372206_at   | AI412469 | similar to chromosome 14 open reading frame 9                                                                                                   | RGD1307475                  | 0.935  | 0.741 | 1.915  | 0.009 | 1.198  | 0.213 | 1.343  | 0.028 |



|            |          |                                                                                                            |                      |        |       |        |       |         |       |        |       |
|------------|----------|------------------------------------------------------------------------------------------------------------|----------------------|--------|-------|--------|-------|---------|-------|--------|-------|
| 1376492_at | AI548527 | similar to chromosome 16 open reading frame 28 (predicted)                                                 | RGD1565247_predicted | 1.082  | 0.608 | 0.960  | 0.750 | 0.958   | 0.909 | 0.687  | 0.106 |
| 1386622_at | BF542874 | Similar to chromosome 16 open reading frame 28 (predicted)                                                 | RGD1565247_predicted | 1.002  | 0.963 | 0.993  | 0.840 | 0.686   | 0.031 | 1.034  | 0.369 |
| 1393242_at | BE104107 | similar to chromosome 16 open reading frame 33; minus -99 protein (predicted)                              | RGD1310922_predicted | 0.781  | 0.692 | 1.084  | 0.623 | 0.865   | 0.019 | 1.081  | 0.415 |
| 1393361_at | H34199   | similar to chromosome 16 open reading frame 33; minus -99 protein (predicted)                              | RGD1310922_predicted | 0.996  | 0.842 | 1.402  | 0.211 | 1.009   | 0.876 | 1.813  | 0.146 |
| 1374217_at | BG375463 | similar to chromosome 16 open reading frame 5                                                              | RGD1310686           | 0.577  | 0.152 | 0.719  | 0.242 | 0.555   | 0.047 | 0.863  | 0.362 |
| 1374169_at | AI236128 | similar to chromosome 16 open reading frame 5                                                              | RGD1310686           | 0.621  | 0.175 | 0.853  | 0.492 | 0.495   | 0.002 | 0.935  | 0.647 |
| 1375674_at | BI294949 | similar to chromosome 16 open reading frame 5                                                              | RGD1310686           | 0.937  | 0.230 | 1.147  | 0.335 | 0.933   | 0.112 | 0.996  | 0.931 |
| 1380456_at | AI044224 | Similar to chromosome 16 open reading frame 7 (predicted)                                                  | RGD1565149_predicted | 1.398  | 0.786 | 0.963  | 0.684 | 0.674   | 0.218 | 0.698  | 0.391 |
| 1373514_at | AA899109 | similar to chromosome 17 open reading frame 27 (predicted)                                                 | RGD1308168_predicted | 70.575 | 0.009 | 24.658 | 0.000 | 163.644 | 0.005 | 53.407 | 0.000 |
| 1379740_at | AW521797 | Similar to chromosome 18 open reading frame 54                                                             | LOC361346            | 0.534  | 0.002 | 1.636  | 0.046 | 0.628   | 0.308 | 1.669  | 0.104 |
| 1379887_at | BI290897 | similar to chromosome 2 open reading frame 3; transcription factor 9 (binds GC-rich sequences) (predicted) | RGD1304792_predicted | 1.368  | 0.203 | 1.856  | 0.023 | 0.723   | 0.278 | 1.823  | 0.018 |
| 1388626_at | AI638949 | similar to chromosome 20 open reading frame 116 (predicted)                                                | RGD1309979_predicted | 0.726  | 0.646 | 0.704  | 0.095 | 0.556   | 0.030 | 0.645  | 0.002 |
| 1379525_at | BF559514 | similar to chromosome 20 open reading frame 155                                                            | RGD1311037           | 0.789  | 0.078 | 0.403  | 0.008 | 0.835   | 0.167 | 0.646  | 0.036 |
| 1390717_at | BM391963 | similar to chromosome 20 open reading frame 155                                                            | RGD1311037           | 1.387  | 0.741 | 1.908  | 0.038 | 0.594   | 0.151 | 1.360  | 0.005 |
| 1390397_at | BF413152 | similar to chromosome 20 open reading frame 39                                                             | RGD1310753           | 1.001  | 0.995 | 0.421  | 0.042 | 1.927   | 0.104 | 0.589  | 0.030 |
| 1394784_at | BF522436 | similar to chromosome 20 open reading frame 6                                                              | RGD1306067           | 0.793  | 0.601 | 1.837  | 0.118 | 0.988   | 0.905 | 1.170  | 0.123 |
| 1392902_at | AW141642 | similar to chromosome 20 open reading frame 6                                                              | RGD1306067           | 0.964  | 0.848 | 1.212  | 0.592 | 0.964   | 0.892 | 0.959  | 0.716 |
| 1371599_at | AI228587 | similar to chromosome 6 open reading frame 106 isoform a                                                   | LOC294154            | 0.780  | 0.244 | 2.082  | 0.005 | 0.841   | 0.056 | 1.584  | 0.041 |
| 1391214_at | BI289378 | similar to chromosome 6 open reading frame 188                                                             | RGD1304835           | 0.909  | 0.705 | 1.701  | 0.244 | 8.613   | 0.002 | 3.793  | 0.060 |
| 1399127_at | AA964600 | similar to chromosome 6 open reading frame 70 (predicted)                                                  | RGD1562376_predicted | 0.960  | 0.491 | 1.044  | 0.741 | 0.927   | 0.216 | 0.909  | 0.368 |
| 1373033_at | BI289505 | similar to chromosome 6 open reading frame 83; similar to RIKEN cDNA 5630401J11                            | MGC105508            | 1.608  | 0.032 | 2.519  | 0.010 | 1.926   | 0.101 | 1.861  | 0.019 |
| 1377872_at | BM383822 | similar to chromosome 7 open reading frame 30 (predicted)                                                  | RGD1306936_predicted | 0.685  | 0.467 | 0.937  | 0.597 | 0.250   | 0.043 | 0.822  | 0.172 |
| 1392078_at | BE108128 | Similar to chromosome 9 open reading frame 20 (predicted)                                                  | RGD1560865_predicted | 2.743  | 0.236 | 0.932  | 0.891 | 3.887   | 0.026 | 1.055  | 0.885 |
| 1374202_at | BM389779 | Similar to chromosome 9 open reading frame 7 (predicted)                                                   | RGD1311501_predicted | 0.485  | 0.348 | 1.189  | 0.182 | 0.717   | 0.215 | 2.006  | 0.014 |
| 1378578_at | BE117291 | similar to chromosome X open reading frame 23 (predicted)                                                  | RGD1562161_predicted | 2.248  | 0.005 | 1.982  | 0.099 | 2.238   | 0.033 | 1.241  | 0.289 |
| 1391603_at | AW527410 | Similar to chromosome X open reading frame 23 (predicted)                                                  | RGD1562161_predicted | 1.016  | 0.922 | 0.818  | 0.383 | 1.036   | 0.859 | 0.796  | 0.267 |
| 1382072_at | AA944162 | Similar to cis-Golgi matrix protein GM130 (predicted)                                                      | RGD1562587_predicted | 1.139  | 0.524 | 1.372  | 0.558 | 1.016   | 0.965 | 1.178  | 0.315 |
| 1388861_at | BF555471 | similar to cisplatin resistance related protein CRR9p (predicted)                                          | RGD1307896_predicted | 0.815  | 0.398 | 0.963  | 0.560 | 0.892   | 0.127 | 0.809  | 0.099 |
| 1399018_at | AI410301 | similar to cisplatin resistance-associated overexpressed protein (predicted)                               | RGD1307981_predicted | 0.702  | 0.011 | 0.714  | 0.001 | 0.851   | 0.738 | 0.805  | 0.003 |
| 1382957_at | BF408881 | similar to cisplatin resistance-associated overexpressed protein (predicted)                               | RGD1307981_predicted | 0.793  | 0.031 | 0.650  | 0.006 | 0.861   | 0.224 | 0.707  | 0.046 |
| 1377694_at | AI598976 | Similar to cisplatin resistance-associated overexpressed protein (predicted)                               | RGD1307981_predicted | 0.818  | 0.084 | 0.631  | 0.151 | 0.860   | 0.661 | 0.466  | 0.118 |
| 1389622_at | AI232643 | similar to citrin (predicted)                                                                              | RGD1565889_predicted | 0.854  | 0.891 | 0.574  | 0.092 | 0.974   | 0.471 | 0.820  | 0.175 |
| 1383616_at | AA997562 | similar to class II cytokine receptor 4 (predicted)                                                        | RGD1560373_predicted | 4.752  | 0.004 | 2.255  | 0.002 | 14.722  | 0.007 | 3.223  | 0.002 |
| 1367537_at | AI012479 | similar to Clast4 protein (predicted)                                                                      | RGD1560908_predicted | 1.693  | 0.008 | 1.598  | 0.017 | 1.696   | 0.000 | 1.502  | 0.019 |
| 1371789_at | AI411601 | similar to ClpP protease                                                                                   | LOC301117            | 0.619  | 0.455 | 1.225  | 0.067 | 0.766   | 0.015 | 0.967  | 0.997 |
| 1395716_at | AW919386 | Similar to c-myc promoter binding protein (predicted)                                                      | RGD1562639_predicted | 0.924  | 0.818 | 1.857  | 0.181 | 0.695   | 0.543 | 0.754  | 0.337 |
| 1372399_at | BM392127 | similar to cofactor of BRCA1; negative elongation factor protein B (predicted)                             | RGD1307832_predicted | 0.884  | 0.640 | 1.147  | 0.036 | 0.873   | 0.381 | 0.918  | 0.199 |
| 1381552_at | BG380975 | Similar to cofactor required for Sp1 transcriptional activation subunit 8 (predicted)                      | RGD1564993_predicted | 1.301  | 0.153 | 1.025  | 0.621 | 1.119   | 0.288 | 0.927  | 0.247 |
| 1372014_at | BM392138 | similar to cofactor required for Sp1 transcriptional activation subunit 8 (predicted)                      | RGD1564993_predicted | 0.933  | 0.786 | 0.667  | 0.143 | 1.153   | 0.908 | 0.969  | 0.854 |
| 1391474_at | AA858511 | Similar to cofactor required for Sp1 transcriptional activation, subunit 2, 150kDa (predicted)             | RGD1560170_predicted | 0.581  | 0.116 | 0.369  | 0.000 | 0.576   | 0.039 | 0.436  | 0.014 |
| 1382634_at | AI044343 | similar to cofactor required for Sp1 transcriptional activation, subunit 2, 150kDa (predicted)             | RGD1560170_predicted | 0.773  | 0.171 | 1.024  | 0.832 | 0.616   | 0.103 | 1.005  | 0.796 |
| 1390138_at | BE107413 | similar to coiled-coil domain containing 8                                                                 | MGC72567             | 0.654  | 0.063 | 0.658  | 0.007 | 0.496   | 0.067 | 0.978  | 0.314 |
| 1384969_at | BE109107 | Similar to collagen, type XXIV, alpha 1 (predicted)                                                        | RGD1565539_predicted | 0.830  | 0.117 | 0.559  | 0.055 | 1.005   | 0.541 | 0.557  | 0.055 |
| 1375767_at | BI287681 | similar to common-site lymphoma leukemia guanine nucleotide exchange factor like (5N754) (predicted)       | RGD1308089_predicted | 3.656  | 0.016 | 4.297  | 0.001 | 3.467   | 0.012 | 4.657  | 0.006 |
| 1373820_at | AI179107 | similar to constitutive photomorphogenic protein 1                                                         | RGD1304773           | 0.991  | 0.238 | 1.159  | 0.082 | 1.059   | 0.144 | 1.287  | 0.263 |
| 1371248_at | BI286387 | similar to Cornifin alpha (Small proline-rich protein 1) (SPRR1)                                           | LOC499660            | 11.666 | 0.019 | 2.753  | 0.082 | 1.481   | 0.586 | 0.994  | 0.986 |
| 1371632_at | AI231166 | Similar to Coronin, actin binding protein 1C (predicted)                                                   | RGD1564490_predicted | 1.417  | 0.227 | 1.317  | 0.040 | 0.740   | 0.108 | 1.224  | 0.124 |
| 1396250_at | BF558291 | Similar to Coronin, actin binding protein 1C (predicted)                                                   | RGD1564490_predicted | 1.407  | 0.295 | 2.658  | 0.011 | 1.129   | 0.399 | 2.335  | 0.007 |
| 1398878_at | Y17326   | similar to CPSF4 protein                                                                                   | MGC108785            | 1.217  | 0.473 | 2.103  | 0.001 | 0.792   | 0.584 | 1.884  | 0.002 |
| 1388503_at | BE107430 | similar to CREBBP/EP300 inhibitory protein 1 (predicted)                                                   | RGD1562702_predicted | 0.760  | 0.005 | 0.514  | 0.001 | 0.866   | 0.075 | 0.549  | 0.017 |
| 1388708_at | AI236927 | similar to cross-immune reaction antigen PCIA1 (predicted)                                                 | RGD1565813_predicted | 0.737  | 0.315 | 1.022  | 0.730 | 0.829   | 0.297 | 0.758  | 0.149 |
| 1385525_at | AI029991 | similar to C-type lectin-like receptor 2 (predicted)                                                       | RGD1563517_predicted | 1.002  | 0.987 | 0.995  | 0.860 | 1.061   | 0.756 | 0.968  | 0.727 |
| 1372400_at | AI180403 | similar to cullin 4A (predicted)                                                                           | RGD1563853_predicted | 0.798  | 0.595 | 0.971  | 0.077 | 0.774   | 0.237 | 0.891  | 0.608 |
| 1377673_at | BF411339 | Similar to cyclin K                                                                                        | LOC500715            | 1.102  | 0.541 | 1.286  | 0.049 | 1.040   | 0.956 | 1.164  | 0.143 |
| 1372062_at | BF394161 | similar to cyclin-dependent kinase 2-interacting protein (predicted)                                       | RGD1563395_predicted | 0.497  | 0.016 | 1.048  | 0.361 | 0.344   | 0.000 | 1.275  | 0.205 |
| 1384488_at | BI290067 | similar to cyclin-dependent kinase inhibitor 2D                                                            | Cdkn2d               | 1.005  | 0.718 | 0.586  | 0.042 | 1.000   | 0.965 | 0.587  | 0.062 |
| 1375495_at | BG376193 | Similar to cyclin-dependent kinase-like 4                                                                  | LOC503009            | 1.062  | 0.848 | 0.922  | 0.763 | 0.872   | 0.692 | 1.120  | 0.686 |
| 1373823_at | AA944180 | similar to Cyclin-dependent kinases regulatory subunit 2 (CKS-2) (predicted)                               | RGD1562047_predicted | 15.391 | 0.003 | 12.154 | 0.000 | 12.383  | 0.001 | 6.706  | 0.000 |
| 1392958_at | AI547426 | similar to cylindromatosis (turban tumor syndrome)                                                         | LOC498035            | 2.817  | 0.000 | 1.320  | 0.051 | 3.350   | 0.000 | 1.645  | 0.009 |
| 1371321_at | AI230604 | similar to Cytochrome c oxidase polypeptide VIb (Cytochrome c oxidase subunit AED) (predicted)             | RGD1565270_predicted | 0.838  | 0.526 | 0.931  | 0.424 | 0.602   | 0.038 | 0.810  | 0.381 |
| 1392720_at | BG376949 | similar to Cytochrome P450 4F6 (CYPIVF6) (predicted)                                                       | RGD1561655_predicted | 1.006  | 0.900 | 1.192  | 0.107 | 1.390   | 0.106 | 1.029  | 0.582 |

|              |          |                                                                                                                              |                         |        |       |       |       |        |       |       |       |
|--------------|----------|------------------------------------------------------------------------------------------------------------------------------|-------------------------|--------|-------|-------|-------|--------|-------|-------|-------|
| 1370990_at   | AI178339 | similar to cytokine receptor related protein 4                                                                               | Cytor4                  | 0.968  | 0.888 | 1.166 | 0.206 | 1.088  | 0.650 | 1.173 | 0.198 |
| 1372288_at   | BE109521 | similar to D11Bwg0280e protein                                                                                               | RGD1309256              | 0.999  | 0.877 | 1.340 | 0.517 | 2.016  | 0.289 | 1.372 | 0.020 |
| 1398923_at   | AI101122 | similar to D11Bwg0434e protein (predicted)                                                                                   | RGD1305687_predicted    | 0.800  | 0.709 | 0.743 | 0.094 | 0.692  | 0.067 | 0.614 | 0.030 |
| 1390462_at   | BI281732 | similar to D11lgp1 (predicted)                                                                                               | RGD1308881_predicted    | 0.850  | 0.391 | 1.033 | 0.358 | 0.732  | 0.472 | 0.747 | 0.655 |
| 1388584_at   | AI598881 | Similar to D15Wsu75e protein                                                                                                 | RGD1305776              | 0.931  | 0.355 | 1.588 | 0.030 | 1.116  | 0.641 | 1.201 | 0.056 |
| 1383700_at   | AA965075 | similar to D15Wsu75e protein                                                                                                 | RGD1305776              | 1.224  | 0.993 | 2.639 | 0.010 | 0.962  | 0.894 | 1.926 | 0.154 |
| 1373049_at   | AI169619 | similar to D1Ert622e protein (predicted)                                                                                     | RGD1562136_predicted    | 4.962  | 0.030 | 3.715 | 0.000 | 6.655  | 0.005 | 3.998 | 0.000 |
| 1396068_at   | AA899954 | Similar to D1Ert622e protein (predicted)                                                                                     | RGD1562136_predicted    | 1.037  | 0.312 | 1.011 | 0.855 | 1.084  | 0.688 | 1.002 | 0.960 |
| 1372563_at   | AA799488 | similar to D330021B20 protein                                                                                                | RGD1308143              | 0.580  | 0.013 | 0.304 | 0.000 | 0.620  | 0.036 | 0.478 | 0.026 |
| 1398363_at   | AI178206 | similar to D3Mm3e (predicted)                                                                                                | RGD1561494_predicted    | 1.414  | 0.740 | 1.268 | 0.030 | 0.715  | 0.663 | 0.948 | 0.599 |
| 1382396_at   | BE101337 | similar to D7Wsu128e protein                                                                                                 | RGD1306614              | 0.634  | 0.194 | 1.128 | 0.812 | 0.515  | 0.069 | 0.910 | 0.307 |
| 1388648_at   | AA799764 | Similar to D7Wsu128e protein                                                                                                 | RGD1306614              | 0.616  | 0.236 | 0.452 | 0.017 | 0.616  | 0.083 | 0.646 | 0.037 |
| 1373228_at   | BI288760 | Similar to D8Ert354e protein (predicted)                                                                                     | RGD1560755_predicted    | 0.298  | 0.016 | 0.492 | 0.002 | 0.351  | 0.014 | 0.352 | 0.053 |
| 1392550_at   | BE111725 | similar to dapper 1 (predicted)                                                                                              | RGD1564008_predicted    | 0.640  | 0.646 | 0.812 | 0.578 | 0.499  | 0.038 | 0.378 | 0.061 |
| 1390974_a_at | BI285675 | Similar to deaminase domain containing 1                                                                                     | LOC502396               | 0.598  | 0.261 | 0.403 | 0.013 | 0.278  | 0.283 | 0.485 | 0.029 |
| 1377270_a_at | BF396493 | similar to decapping enzyme Dcp1b (predicted)                                                                                | RGD1562214_predicted    | 0.613  | 0.501 | 1.700 | 0.009 | 1.620  | 0.431 | 1.321 | 0.035 |
| 1377835_at   | BM390876 | similar to dedicator of cytokinesis 8                                                                                        | LOC499337               | 0.829  | 0.006 | 0.308 | 0.009 | 1.172  | 0.056 | 0.522 | 0.019 |
| 1379420_at   | AI145019 | similar to Dehydrogenase/reductase SDR family member 7 precursor (Retinal short-chain dehydrogenase/reductase 4) (predicted) | RGD1565002_predicted    | 0.429  | 0.085 | 0.462 | 0.003 | 0.463  | 0.003 | 0.457 | 0.005 |
| 1374718_at   | AA945915 | Similar to deltex 3-like (predicted)                                                                                         | RGD1565144_predicted    | 12.220 | 0.000 | 6.350 | 0.000 | 14.747 | 0.000 | 9.142 | 0.000 |
| 1389504_at   | BI297929 | Similar to Deltex3 (predicted)                                                                                               | RGD1566181_predicted    | 1.187  | 0.398 | 0.959 | 0.756 | 0.992  | 0.524 | 0.880 | 0.801 |
| 1383042_at   | AA944383 | Similar to Dendritic cell protein GA17 (predicted)                                                                           | RGD1565840_predicted    | 1.606  | 0.328 | 1.208 | 0.143 | 2.184  | 0.361 | 1.038 | 0.772 |
| 1373044_at   | BI285403 | similar to Dendritic cell protein GA17 (predicted)                                                                           | RGD1565840_predicted    | 0.801  | 0.827 | 1.245 | 0.843 | 0.695  | 0.645 | 1.083 | 0.542 |
| 1375563_at   | AA944394 | Similar to dendritic cell-derived ubiquitin-like protein (predicted)                                                         | RGD1305506_predicted    | 0.791  | 0.039 | 0.355 | 0.000 | 0.792  | 0.032 | 0.389 | 0.012 |
| 1384773_at   | AI044323 | similar to dendritic cell-derived ubiquitin-like protein (predicted)                                                         | RGD1305506_predicted    | 0.923  | 0.427 | 0.623 | 0.008 | 0.795  | 0.193 | 0.491 | 0.002 |
| 1372764_at   | BI276261 | similar to density regulated protein drp1                                                                                    | LOC498180               | 1.023  | 0.987 | 1.288 | 0.242 | 0.784  | 0.309 | 1.098 | 0.965 |
| 1375269_at   | BM391516 | similar to Deoxyribose-phosphate aldolase-like (predicted)                                                                   | RGD1562330_predicted    | 0.510  | 0.389 | 0.860 | 0.120 | 0.348  | 0.067 | 0.924 | 0.045 |
| 1399054_at   | BG375798 | similar to deubiquitinating enzyme UBH1 (predicted)                                                                          | RGD1563750_predicted    | 0.802  | 0.918 | 1.043 | 0.121 | 1.029  | 0.708 | 0.997 | 0.616 |
| 1397439_at   | AI101639 | similar to diacylglycerol kinase epsilon                                                                                     | LOC497978               | 0.449  | 0.012 | 0.770 | 0.333 | 0.571  | 0.332 | 0.652 | 0.200 |
| 1376377_at   | BF398599 | Similar to Diap3 protein (predicted)                                                                                         | RGD1565114_predicted    | 1.047  | 0.853 | 1.001 | 0.995 | 1.403  | 0.033 | 1.004 | 0.627 |
| 1379329_at   | AI600082 | Similar to dimerization cofactor of hepatocyte nuclear factor 1 ( HNF1) from muscle (predicted)                              | RGD1563318_predicted    | 0.815  | 0.190 | 0.983 | 0.334 | 0.817  | 0.683 | 0.891 | 0.311 |
| 1379330_s_at | AI600082 | Similar to dimerization cofactor of hepatocyte nuclear factor 1 ( HNF1) from muscle (predicted)                              | RGD1563318_predicted    | 0.661  | 0.685 | 1.021 | 0.912 | 0.644  | 0.022 | 0.753 | 0.464 |
| 1397179_at   | BF544981 | similar to DIP13 alpha (predicted)                                                                                           | RGD1309388_predicted    | 2.032  | 0.023 | 0.782 | 0.141 | 1.510  | 0.204 | 0.586 | 0.202 |
| 1382556_a_at | AI412140 | similar to DIP13 alpha (predicted)                                                                                           | RGD1309388_predicted    | 1.599  | 0.057 | 3.254 | 0.000 | 1.383  | 0.161 | 2.765 | 0.001 |
| 1389539_at   | BG378248 | similar to DIP13 alpha (predicted)                                                                                           | RGD1309388_predicted    | 1.158  | 0.754 | 1.218 | 0.067 | 0.739  | 0.227 | 1.417 | 0.063 |
| 1376729_at   | AI231781 | similar to DIP13 alpha (predicted)                                                                                           | RGD1309388_predicted    | 0.901  | 0.986 | 1.030 | 0.680 | 0.694  | 0.513 | 1.029 | 0.710 |
| 1375580_at   | AI547421 | Similar to dipeptidylpeptidase 9                                                                                             | LOC301130               | 0.974  | 0.853 | 0.806 | 0.109 | 0.897  | 0.506 | 0.777 | 0.230 |
| 1374199_at   | BI282130 | similar to Disco-interacting protein 2 homolog                                                                               | LOC309692               | 0.839  | 0.979 | 0.745 | 0.978 | 0.694  | 0.099 | 0.746 | 0.388 |
| 1392495_at   | BF408346 | similar to dJ202D23.2 (novel protein similar to C21ORF5 (KIAA0933)) (predicted)                                              | RGD1305534_predicted    | 1.082  | 0.722 | 0.855 | 0.279 | 0.776  | 0.228 | 0.919 | 0.012 |
| 1391282_at   | AI029285 | Similar to dJ55C23.6 gene product (predicted)                                                                                | RGD1306962_predicted    | 0.599  | 0.020 | 0.650 | 0.003 | 0.661  | 0.516 | 0.562 | 0.027 |
| 1373899_at   | BI275244 | similar to dJ842G6.1.1 (novel protein) (predicted)                                                                           | RGD1309829_predicted    | 0.513  | 0.029 | 1.797 | 0.012 | 0.656  | 0.045 | 1.008 | 0.116 |
| 1372075_at   | AI177866 | similar to dJ862K6.2.2 (splicing factor, arginine/serine-rich 6 (SRP55-2)(isoform 2))                                        | LOC362264               | 0.619  | 0.062 | 0.599 | 0.015 | 0.986  | 0.736 | 0.812 | 0.033 |
| 1394392_at   | BI289554 | similar to dJ881L22.2 (novel protein) (predicted)                                                                            | RGD1307696_predicted    | 0.869  | 0.490 | 1.036 | 0.825 | 0.621  | 0.009 | 0.910 | 0.553 |
| 1382093_at   | AI178038 | Similar to DKFZP434B168 protein (predicted)                                                                                  | RGD1308014_predicted    | 0.752  | 0.437 | 0.678 | 0.412 | 0.542  | 0.032 | 0.735 | 0.344 |
| 1379424_at   | BE115825 | Similar to DKFZP434B168 protein (predicted)                                                                                  | RGD1308014_predicted    | 0.721  | 0.917 | 0.774 | 0.081 | 0.798  | 0.085 | 0.682 | 0.051 |
| 1390249_at   | BF558075 | similar to DKFZP434H132 protein                                                                                              | RGD1305464              | 1.657  | 0.080 | 3.871 | 0.015 | 0.484  | 0.024 | 1.807 | 0.008 |
| 1390058_at   | BI291197 | similar to DKFZP547E1010 protein                                                                                             | LOC361990               | 0.941  | 0.855 | 0.952 | 0.900 | 0.823  | 0.007 | 1.052 | 0.592 |
| 1380848_at   | AI102396 | similar to DKFZP547E1010 protein /// similar to Protein HT031 homolog                                                        | LOC361990 /// LOC500378 | 1.002  | 0.854 | 1.163 | 0.300 | 0.999  | 0.991 | 0.904 | 0.527 |
| 1393718_at   | BE117189 | Similar to DKFZP564P1916 protein (predicted)                                                                                 | RGD1311704_predicted    | 1.388  | 0.171 | 1.503 | 0.081 | 1.024  | 0.878 | 1.553 | 0.080 |
| 1381713_at   | BE106279 | Similar to DKFZP564P1916 protein (predicted)                                                                                 | RGD1311704_predicted    | 1.304  | 0.207 | 2.162 | 0.010 | 1.277  | 0.830 | 2.137 | 0.011 |
| 1390719_at   | BI294889 | Similar to DKFZP564P1916 protein (predicted)                                                                                 | RGD1311704_predicted    | 0.976  | 0.434 | 1.769 | 0.065 | 0.722  | 0.707 | 1.491 | 0.214 |
| 1372584_at   | BG672517 | similar to DKFZP566K1924 protein                                                                                             | RGD1308373              | 0.505  | 0.003 | 0.263 | 0.000 | 0.638  | 0.011 | 0.385 | 0.011 |
| 1391184_at   | BM390990 | Similar to DNA binding protein RFX2                                                                                          | LOC301121               | 1.289  | 0.417 | 1.264 | 0.316 | 1.027  | 0.902 | 1.425 | 0.065 |
| 1389268_at   | BI285816 | similar to DNA polymerase lambda                                                                                             | LOC361767               | 0.862  | 0.029 | 1.001 | 0.934 | 1.008  | 0.996 | 1.179 | 0.410 |
| 1372353_at   | BE096387 | similar to DNA segment on chromosome X and Y (unique) 155 expressed sequence isoform 1                                       | LOC288526               | 1.141  | 0.394 | 2.712 | 0.022 | 0.923  | 0.880 | 1.966 | 0.046 |
| 1383638_at   | AW524125 | Similar to DNA segment on chromosome X and Y (unique) 155 expressed sequence isoform 1 (predicted)                           | RGD1566363_predicted    | 0.900  | 0.233 | 0.351 | 0.016 | 1.364  | 0.063 | 0.750 | 0.005 |
| 1381143_at   | AI029836 | Similar to DNA segment, Chr 1, Brigham & Womens Genetics 0212 expressed (predicted)                                          | RGD1560909_predicted    | 0.791  | 0.515 | 0.924 | 0.228 | 1.103  | 0.473 | 0.919 | 0.618 |
| 1392481_at   | BG057566 | similar to DNA segment, Chr 1, Brigham & Womens Genetics 0212 expressed (predicted)                                          | RGD1560909_predicted    | 0.992  | 0.791 | 1.644 | 0.027 | 0.875  | 0.242 | 1.865 | 0.000 |
| 1388327_at   | AI232357 | similar to DNA segment, Chr 10, ERATO Doi 214, expressed (predicted)                                                         | RGD1309529_predicted    | 0.583  | 0.306 | 1.064 | 0.238 | 0.419  | 0.004 | 0.946 | 0.488 |
| 1394568_at   | BE108086 | similar to DNA segment, Chr 10, Wayne State University 102, expressed (predicted)                                            | RGD1563365_predicted    | 0.785  | 0.444 | 1.341 | 0.268 | 0.931  | 0.978 | 1.170 | 0.201 |
| 1372019_at   | AI231789 | similar to DNA segment, Chr 13, Wayne State University 50, expressed (predicted)                                             | RGD1310128_predicted    | 0.995  | 0.407 | 1.278 | 0.075 | 1.301  | 0.334 | 1.206 | 0.133 |

|              |          |                                                                                                                                                                                                                                                             |                                                             |       |       |       |       |       |       |       |       |
|--------------|----------|-------------------------------------------------------------------------------------------------------------------------------------------------------------------------------------------------------------------------------------------------------------|-------------------------------------------------------------|-------|-------|-------|-------|-------|-------|-------|-------|
| 1372803_at   | BF281969 | similar to DNA segment, Chr 14, ERATO Doi 449, expressed                                                                                                                                                                                                    | RGD1305689                                                  | 0.467 | 0.059 | 0.946 | 0.269 | 0.569 | 0.298 | 0.947 | 0.092 |
| 1367493_at   | AI599288 | similar to DNA segment, Chr 18, Wayne State University 98, expressed (predicted)                                                                                                                                                                            | RGD1560212_predicted                                        | 0.680 | 0.103 | 1.177 | 0.234 | 0.623 | 0.063 | 1.288 | 0.142 |
| 1385020_at   | BM387790 | similar to DNA segment, Chr 19, Brigham & Womens Genetics 1357 expressed (predicted) /// hypothetical protein LOC499339                                                                                                                                     | RGD1308750_predicted /// LOC499339                          | 0.505 | 0.032 | 2.539 | 0.029 | 0.522 | 0.050 | 1.209 | 0.992 |
| 1376408_at   | BF418111 | similar to DNA segment, Chr 19, Brigham & Womens Genetics 1357 expressed (predicted) /// similar to DNA segment, Chr 19, Brigham & Womens Genetics 1357 expressed (predicted) /// hypothetical protein LOC499339                                            | RGD1308750_predicted /// RGD1560288_predicted /// LOC499339 | 1.033 | 0.103 | 6.758 | 0.043 | 1.303 | 0.311 | 3.246 | 0.011 |
| 1386725_at   | BF566582 | similar to DNA segment, Chr 19, ERATO Doi 386, expressed (predicted)                                                                                                                                                                                        | RGD1307934_predicted                                        | 1.214 | 0.158 | 2.004 | 0.056 | 1.006 | 0.947 | 0.822 | 0.064 |
| 1377414_at   | BF400262 | Similar to DNA segment, Chr 19, ERATO Doi 386, expressed (predicted)                                                                                                                                                                                        | RGD1307934_predicted                                        | 1.848 | 0.345 | 2.711 | 0.008 | 1.622 | 0.713 | 1.341 | 0.156 |
| 1374176_at   | AI408727 | similar to DNA segment, Chr 4, Brigham & Womens Genetics 0951 expressed                                                                                                                                                                                     | RGD1308059                                                  | 1.381 | 0.274 | 1.128 | 0.538 | 1.023 | 0.439 | 1.058 | 0.822 |
| 1375645_at   | AI408842 | similar to DNA segment, Chr 4, ERATO Doi 22, expressed (predicted)                                                                                                                                                                                          | RGD1560286_predicted                                        | 1.588 | 0.346 | 3.007 | 0.011 | 1.576 | 0.072 | 2.375 | 0.060 |
| 1392816_at   | BI304039 | similar to DNA segment, Chr 6, Wayne State University 163, expressed (predicted)                                                                                                                                                                            | RGD1311164_predicted                                        | 1.003 | 0.379 | 0.771 | 0.028 | 0.709 | 0.328 | 0.768 | 0.085 |
| 1399165_a_at | AA943500 | similar to DNA segment, Chr 7, ERATO Doi 462, expressed (predicted)                                                                                                                                                                                         | RGD1309393_predicted                                        | 0.199 | 0.003 | 1.212 | 0.549 | 0.219 | 0.001 | 1.055 | 0.383 |
| 1376221_at   | BG373555 | similar to DNA segment, Chr 7, ERATO Doi 462, expressed (predicted)                                                                                                                                                                                         | RGD1309393_predicted                                        | 0.687 | 0.516 | 0.739 | 0.019 | 0.450 | 0.073 | 0.837 | 0.111 |
| 1374472_at   | AI710526 | similar to DNA segment, Chr 8, ERATO Doi 531, expressed                                                                                                                                                                                                     | MGC116266                                                   | 1.396 | 0.008 | 1.872 | 0.002 | 1.029 | 0.119 | 1.909 | 0.002 |
| 1388420_at   | BM389730 | similar to DNA topoisomerase (ATP-hydrolysing)                                                                                                                                                                                                              | LOC361100                                                   | 1.104 | 0.340 | 0.945 | 0.430 | 1.218 | 0.063 | 0.954 | 0.302 |
| 1374727_at   | AF244895 | similar to DnaJ (Hsp40) homolog, subfamily B, member 12                                                                                                                                                                                                     | LOC294513                                                   | 1.206 | 0.240 | 0.934 | 0.987 | 1.169 | 0.045 | 0.980 | 0.801 |
| 1389487_at   | AA818949 | similar to DnaJ (Hsp40) homolog, subfamily B, member 12 /// similar to DnaJ (Hsp40) homolog, subfamily B, member 12                                                                                                                                         | LOC294513 /// LOC363376                                     | 1.884 | 0.133 | 2.533 | 0.018 | 1.091 | 0.216 | 1.604 | 0.014 |
| 1399039_at   | BM383865 | Similar to Dnajb10 protein (predicted)                                                                                                                                                                                                                      | RGD1560574_predicted                                        | 0.411 | 0.017 | 1.246 | 0.025 | 0.461 | 0.033 | 1.141 | 0.188 |
| 1389102_at   | BG378147 | similar to Dock1 protein (predicted)                                                                                                                                                                                                                        | RGD1566072_predicted                                        | 0.622 | 0.075 | 0.771 | 0.064 | 1.116 | 0.379 | 0.592 | 0.055 |
| 1383846_at   | AI576094 | similar to Docking protein 5 (Downstream of tyrosine kinase 5) (Protein dok-5) (predicted)                                                                                                                                                                  | RGD1562846_predicted                                        | 1.934 | 0.007 | 1.088 | 0.133 | 1.514 | 0.710 | 0.961 | 0.860 |
| 1396206_at   | BG665525 | similar to Docking protein 5 (Downstream of tyrosine kinase 5) (Protein dok-5) (predicted)                                                                                                                                                                  | RGD1562846_predicted                                        | 1.319 | 0.136 | 0.969 | 0.572 | 1.064 | 0.969 | 1.014 | 0.690 |
| 1372504_at   | AI179780 | similar to dolichyl-phosphate mannosyltransferase polypeptide 3 (Dolichol-phosphate mannose synthase subunit 3) (predicted) /// similar to dolichyl-phosphate mannosyltransferase polypeptide 3 (Dolichol-phosphate mannose synthase subunit 3) (predicted) | RGD1561807_predicted /// RGD1561645_predicted               | 0.710 | 0.197 | 0.976 | 0.924 | 0.889 | 0.148 | 1.106 | 0.392 |
| 1373997_at   | AA925118 | Similar to Drctnb1a (predicted)                                                                                                                                                                                                                             | RGD1562906_predicted                                        | 0.923 | 0.582 | 1.604 | 0.223 | 0.828 | 0.449 | 1.024 | 0.917 |
| 1385499_at   | AI029352 | similar to DRE1 protein (predicted)                                                                                                                                                                                                                         | RGD1565895_predicted                                        | 0.999 | 0.997 | 0.793 | 0.038 | 1.001 | 0.999 | 0.742 | 0.075 |
| 1394359_at   | BF553498 | similar to DUF729 domain containing 1                                                                                                                                                                                                                       | LOC364500                                                   | 1.455 | 0.009 | 1.000 | 0.948 | 1.916 | 0.020 | 0.987 | 0.882 |
| 1372650_at   | BI296334 | similar to Dynamin binding protein (Scaffold protein Tuba)                                                                                                                                                                                                  | LOC309362                                                   | 0.884 | 0.273 | 1.287 | 0.113 | 0.886 | 0.816 | 1.020 | 0.623 |
| 1392279_at   | BI291154 | similar to dynein, axonemal, intermediate chain 1                                                                                                                                                                                                           | LOC500442                                                   | 0.873 | 0.619 | 0.575 | 0.061 | 0.999 | 0.999 | 0.627 | 0.340 |
| 1396106_at   | BF565241 | Similar to dystrobrevin alpha isoform 1 (predicted)                                                                                                                                                                                                         | RGD1561985_predicted                                        | 0.895 | 0.644 | 0.721 | 0.905 | 1.495 | 0.254 | 1.038 | 0.824 |
| 1374416_at   | AI169330 | similar to E2-induced gene 2 protein (predicted)                                                                                                                                                                                                            | RGD1562228_predicted                                        | 0.757 | 0.153 | 1.121 | 0.426 | 0.702 | 0.038 | 1.119 | 0.341 |
| 1393466_at   | BF411837 | similar to EAPG6122 (predicted)                                                                                                                                                                                                                             | RGD1563673_predicted                                        | 0.903 | 0.057 | 0.709 | 0.115 | 0.972 | 0.077 | 0.713 | 0.117 |
| 1388600_at   | AI011713 | Similar to EF-hand domain (C-terminal) containing 1                                                                                                                                                                                                         | LOC301295                                                   | 3.291 | 0.031 | 0.759 | 0.348 | 9.038 | 0.000 | 2.054 | 0.133 |
| 1397772_at   | BF390195 | Similar to EF-hand domain (C-terminal) containing 1                                                                                                                                                                                                         | LOC301295                                                   | 1.005 | 0.948 | 0.947 | 0.412 | 1.607 | 0.068 | 0.998 | 0.967 |
| 1391163_at   | BM385306 | similar to Eftud1 protein (predicted)                                                                                                                                                                                                                       | RGD1566096_predicted                                        | 1.090 | 0.858 | 3.712 | 0.001 | 0.879 | 0.430 | 2.918 | 0.004 |
| 1396880_at   | AI548656 | similar to EG:49E4.1 (predicted)                                                                                                                                                                                                                            | RGD1563471_predicted                                        | 0.903 | 0.852 | 1.416 | 0.791 | 1.399 | 0.901 | 1.141 | 0.362 |
| 1382084_at   | AA850264 | Similar to EHM2 (predicted)                                                                                                                                                                                                                                 | RGD1562988_predicted                                        | 0.769 | 0.747 | 0.805 | 0.055 | 0.644 | 0.101 | 0.774 | 0.180 |
| 1389975_at   | BE116949 | similar to ELAV (embryonic lethal, abnormal vision, Drosophila)-like 4 (Hu antigen D) (predicted)                                                                                                                                                           | RGD1561943_predicted                                        | 0.631 | 0.084 | 0.323 | 0.001 | 0.589 | 0.130 | 0.326 | 0.002 |
| 1391062_at   | AA875129 | similar to elongation protein 4 homolog (predicted)                                                                                                                                                                                                         | RGD1566052_predicted                                        | 0.434 | 0.004 | 0.187 | 0.000 | 0.531 | 0.004 | 0.180 | 0.013 |
| 1391843_at   | BF393134 | Similar to elongation protein 4 homolog (predicted)                                                                                                                                                                                                         | RGD1566052_predicted                                        | 1.394 | 0.232 | 0.789 | 0.386 | 1.195 | 0.521 | 0.838 | 0.422 |
| 1375530_at   | BG374612 | similar to EMeg32 protein (predicted)                                                                                                                                                                                                                       | RGD1563144_predicted                                        | 0.907 | 0.507 | 1.424 | 0.251 | 1.125 | 0.792 | 1.211 | 0.516 |
| 1384048_at   | BI297740 | Similar to EMSY protein (predicted)                                                                                                                                                                                                                         | RGD1310712_predicted                                        | 0.909 | 0.183 | 0.993 | 0.949 | 1.016 | 0.062 | 1.209 | 0.161 |
| 1394572_at   | AI231560 | Similar to EMSY protein (predicted)                                                                                                                                                                                                                         | RGD1310712_predicted                                        | 1.245 | 0.551 | 0.944 | 0.804 | 0.801 | 0.346 | 0.931 | 0.999 |
| 1378611_at   | BE112744 | Similar to encephalopsin                                                                                                                                                                                                                                    | LOC498289                                                   | 0.516 | 0.021 | 0.430 | 0.059 | 0.643 | 0.035 | 0.780 | 0.130 |
| 1393373_at   | BI289640 | similar to encephalopsin                                                                                                                                                                                                                                    | LOC498289                                                   | 0.339 | 0.026 | 0.860 | 0.754 | 0.481 | 0.062 | 0.923 | 0.484 |
| 1371544_at   | BE109666 | similar to Enhancer of rudimentary homolog (predicted)                                                                                                                                                                                                      | RGD1561971_predicted                                        | 0.737 | 0.337 | 1.044 | 0.948 | 0.620 | 0.046 | 1.218 | 0.083 |
| 1382464_at   | BF547020 | similar to ENSANGP00000021391 (predicted)                                                                                                                                                                                                                   | RGD1309779_predicted                                        | 0.457 | 0.067 | 0.554 | 0.008 | 0.605 | 0.031 | 0.567 | 0.001 |
| 1393185_at   | BF283249 | Similar to envelope (predicted)                                                                                                                                                                                                                             | RGD1559689_predicted                                        | 1.001 | 0.487 | 1.011 | 0.247 | 1.005 | 0.937 | 0.962 | 0.628 |
| 1375714_at   | BI289124 | similar to Erbb2 interacting protein isoform 2 (predicted)                                                                                                                                                                                                  | RGD1562952_predicted                                        | 1.205 | 0.074 | 1.142 | 0.384 | 1.214 | 0.164 | 1.377 | 0.003 |
| 1383346_at   | BF387821 | similar to ERCC4_MOUSE (predicted)                                                                                                                                                                                                                          | RGD1560340_predicted                                        | 0.750 | 0.883 | 0.803 | 0.044 | 0.913 | 0.993 | 0.658 | 0.013 |
| 1371439_at   | AA894008 | similar to erythrocyte membrane protein band 4.1 (elliptocytosis 1, RH-linked) isoform 1 (predicted)                                                                                                                                                        | RGD1564762_predicted                                        | 1.308 | 0.368 | 1.873 | 0.069 | 1.084 | 0.604 | 1.171 | 0.985 |
| 1392311_at   | BF389762 | Similar to erythrocyte membrane protein band 4.1 (elliptocytosis 1, RH-linked) isoform 1 (predicted)                                                                                                                                                        | RGD1564762_predicted                                        | 1.796 | 0.629 | 0.832 | 0.360 | 0.842 | 0.545 | 0.918 | 0.750 |
| 1388535_at   | BF403698 | Similar to erythroid differentiation-related factor 1 (predicted)                                                                                                                                                                                           | RGD1306820_predicted                                        | 1.145 | 0.851 | 2.116 | 0.052 | 1.116 | 0.656 | 1.262 | 0.377 |
| 1398999_at   | BF283508 | similar to es 64 /// similar to hypothetical protein (predicted)                                                                                                                                                                                            | LOC363675 /// RGD1563557_predicted                          | 0.746 | 0.431 | 1.306 | 0.085 | 0.757 | 0.210 | 1.430 | 0.089 |
| 1398943_at   | BI274583 | similar to Eso3 protein (predicted)                                                                                                                                                                                                                         | RGD1562476_predicted                                        | 0.506 | 0.218 | 0.374 | 0.036 | 0.365 | 0.027 | 0.446 | 0.009 |
| 1389482_at   | BI279701 | similar to EST AA792894                                                                                                                                                                                                                                     | RGD1306495                                                  | 1.086 | 0.452 | 0.725 | 0.022 | 1.099 | 0.488 | 0.936 | 0.173 |
| 1395813_at   | AW144176 | similar to EST AA792894                                                                                                                                                                                                                                     | RGD1306495                                                  | 0.880 | 0.485 | 0.755 | 0.018 | 1.120 | 0.605 | 0.843 | 0.165 |
| 1377685_at   | AW435161 | similar to establishment of cohesion 1 homolog 1                                                                                                                                                                                                            | LOC498820                                                   | 1.230 | 0.023 | 1.216 | 0.049 | 0.979 | 0.849 | 1.204 | 0.077 |

|              |           |                                                                                          |                      |        |       |        |       |        |       |        |       |
|--------------|-----------|------------------------------------------------------------------------------------------|----------------------|--------|-------|--------|-------|--------|-------|--------|-------|
| 1397712_at   | BF290256  | similar to establishment of cohesion 1 homolog 1                                         | LOC498820            | 1.085  | 0.818 | 1.123  | 0.280 | 1.155  | 0.914 | 1.486  | 0.794 |
| 1372331_at   | BM386033  | similar to eukaryotic translation initiation factor 1A, Y-linked (predicted)             | RGD1560198_predicted | 1.034  | 0.287 | 1.293  | 0.040 | 1.003  | 0.977 | 1.346  | 0.028 |
| 1388328_at   | BM392200  | similar to Eukaryotic translation initiation factor 3 subunit 2 (eIF-3 beta) (predicted) | RGD1560498_predicted | 0.678  | 0.578 | 1.179  | 0.211 | 0.582  | 0.107 | 1.072  | 0.584 |
| 1391935_at   | AI575608  | similar to eukaryotic translation initiation factor 4E member 3                          | LOC297481            | 1.248  | 0.101 | 1.024  | 0.708 | 1.232  | 0.317 | 0.918  | 0.587 |
| 1398197_at   | BF390021  | Similar to Exocyst complex component Sec15B (predicted)                                  | RGD1560638_predicted | 2.349  | 0.758 | 0.852  | 0.502 | 1.156  | 0.192 | 0.585  | 0.535 |
| 1381872_at   | AI137061  | Similar to expressed sequence AA408877                                                   | RGD1308513           | 0.994  | 0.150 | 0.897  | 0.142 | 0.639  | 0.067 | 0.845  | 0.404 |
| 1398991_at   | BM389704  | Similar to expressed sequence AA408877                                                   | RGD1308513           | 0.450  | 0.152 | 0.215  | 0.000 | 0.581  | 0.012 | 0.298  | 0.014 |
| 1399138_at   | BG672805  | similar to expressed sequence AA408877                                                   | RGD1308513           | 0.766  | 0.250 | 0.237  | 0.005 | 0.652  | 0.109 | 0.266  | 0.002 |
| 1374197_at   | AI177275  | Similar to expressed sequence AA415817 (predicted)                                       | RGD1562597_predicted | 0.763  | 0.307 | 0.373  | 0.007 | 0.748  | 0.030 | 0.548  | 0.011 |
| 1391968_at   | BM389535  | Similar to expressed sequence AA415817 (predicted)                                       | RGD1562597_predicted | 1.134  | 0.585 | 0.720  | 0.186 | 0.742  | 0.311 | 0.547  | 0.121 |
| 1374639_at   | AA800800  | similar to Expressed sequence AI317223                                                   | LOC287522            | 1.325  | 0.589 | 1.374  | 0.093 | 1.161  | 0.165 | 1.100  | 0.699 |
| 1395349_at   | BF561061  | Similar to expressed sequence AI317237 (predicted)                                       | RGD1305671_predicted | 2.072  | 0.040 | 2.491  | 0.012 | 1.425  | 0.000 | 1.970  | 0.028 |
| 1376419_at   | BE116226  | Similar to expressed sequence AI317237 (predicted)                                       | RGD1305671_predicted | 1.556  | 0.043 | 1.089  | 0.337 | 1.464  | 0.055 | 0.956  | 0.510 |
| 1396868_at   | AI555860  | Similar to expressed sequence AI317237 (predicted)                                       | RGD1305671_predicted | 1.170  | 0.050 | 1.002  | 0.338 | 1.012  | 0.972 | 1.008  | 0.531 |
| 1382113_at   | BF398543  | Similar to expressed sequence AI449175                                                   | MGC72612             | 0.732  | 0.038 | 0.946  | 0.056 | 0.942  | 0.817 | 1.034  | 0.838 |
| 1372202_at   | BF284058  | similar to expressed sequence AI597479                                                   | RGD1310553           | 0.814  | 0.535 | 0.617  | 0.090 | 0.567  | 0.006 | 0.737  | 0.061 |
| 1378812_at   | BF412101  | similar to expressed sequence AI854635 (predicted)                                       | RGD1565881_predicted | 1.230  | 0.124 | 1.446  | 0.092 | 0.755  | 0.354 | 1.080  | 0.077 |
| 1379062_at   | BI291230  | similar to Expressed sequence AU019823 (predicted)                                       | RGD1560003_predicted | 0.996  | 0.517 | 1.189  | 0.255 | 2.348  | 0.135 | 1.400  | 0.237 |
| 1378374_at   | BE100748  | similar to expressed sequence AU021034 (predicted)                                       | RGD1560137_predicted | 0.995  | 0.954 | 0.991  | 0.923 | 0.998  | 0.987 | 1.372  | 0.096 |
| 1398920_at   | AI228651  | Similar to expressed sequence AU040320 (predicted)                                       | RGD1307489_predicted | 0.683  | 0.003 | 0.350  | 0.001 | 0.667  | 0.022 | 0.472  | 0.009 |
| 1394478_at   | BF388080  | Similar to expressed sequence AU040320 (predicted)                                       | RGD1307489_predicted | 1.001  | 0.979 | 0.972  | 0.782 | 0.997  | 0.860 | 1.007  | 0.986 |
| 1399051_at   | BE104409  | similar to expressed sequence AV312086 (predicted)                                       | RGD1305514_predicted | 1.673  | 0.010 | 3.147  | 0.001 | 1.190  | 0.037 | 2.519  | 0.003 |
| 1380753_at   | BF398036  | similar to expressed sequence AV312086 (predicted)                                       | RGD1305514_predicted | 0.996  | 0.485 | 1.042  | 0.831 | 1.087  | 0.489 | 0.924  | 0.591 |
| 1390657_at   | BI291389  | Similar to expressed sequence AV312086 (predicted)                                       | RGD1305514_predicted | 1.034  | 0.914 | 1.019  | 0.937 | 1.307  | 0.586 | 0.853  | 0.163 |
| 1399108_at   | BM383630  | similar to expressed sequence AV340375                                                   | RGD1308959           | 1.360  | 0.144 | 0.994  | 0.983 | 3.073  | 0.057 | 1.467  | 0.088 |
| 1380513_at   | BE095638  | similar to Expressed sequence AW060207                                                   | RGD1309034           | 2.298  | 0.054 | 2.548  | 0.017 | 5.712  | 0.001 | 4.290  | 0.004 |
| 1390758_at   | BF393473  | Similar to Expressed sequence AW060207                                                   | RGD1309034           | 1.188  | 0.404 | 0.690  | 0.068 | 1.499  | 0.404 | 1.030  | 0.347 |
| 1388493_at   | AI600030  | Similar to Expressed sequence AW146242 (predicted)                                       | RGD1306494_predicted | 0.997  | 0.987 | 0.998  | 0.827 | 0.864  | 0.989 | 1.148  | 0.883 |
| 1373547_at   | AA849782  | similar to expressed sequence AW209491                                                   | RGD1308147           | 0.259  | 0.035 | 0.145  | 0.001 | 0.230  | 0.034 | 0.324  | 0.000 |
| 1376919_at   | BG665267  | Similar to expressed sequence AW212394 (predicted)                                       | RGD1562317_predicted | 0.704  | 0.616 | 1.471  | 0.045 | 0.678  | 0.070 | 1.448  | 0.043 |
| 1371970_at   | AA799328  | similar to expressed sequence AW413625 (predicted)                                       | RGD1560913_predicted | 0.550  | 0.606 | 0.795  | 0.865 | 0.895  | 0.870 | 0.668  | 0.765 |
| 1371663_at   | AI232361  | similar to expressed sequence AW556797 (predicted)                                       | RGD1305138_predicted | 1.515  | 0.044 | 2.298  | 0.058 | 1.252  | 0.074 | 1.290  | 0.181 |
| 1382942_at   | BF397627  | Similar to Ext1                                                                          | LOC299907            | 2.561  | 0.031 | 0.953  | 0.827 | 3.847  | 0.002 | 1.571  | 0.013 |
| 1373393_at   | BM384468  | similar to Ext1                                                                          | LOC299907            | 2.339  | 0.134 | 1.760  | 0.002 | 2.291  | 0.002 | 1.996  | 0.009 |
| 1392083_at   | BF415852  | Similar to Ext1                                                                          | LOC299907            | 1.417  | 0.847 | 0.861  | 0.039 | 1.708  | 0.308 | 0.868  | 0.175 |
| 1373290_at   | AI012781  | similar to Ezh2 protein                                                                  | LOC312299            | 0.995  | 0.841 | 1.112  | 0.646 | 1.280  | 0.105 | 1.787  | 0.098 |
| 1367522_at   | AA894324  | similar to Factor VIII associated protein (predicted)                                    | RGD1566014_predicted | 0.576  | 0.186 | 0.693  | 0.009 | 0.629  | 0.061 | 0.782  | 0.008 |
| 1399020_at   | AI232979  | similar to family with sequence similarity 40, member A                                  | LOC362012            | 0.750  | 0.057 | 0.525  | 0.009 | 0.687  | 0.047 | 0.690  | 0.061 |
| 1394826_at   | BF417759  | Similar to Fanconi anemia, complementation group F (predicted)                           | RGD1561456_predicted | 0.885  | 0.634 | 1.141  | 0.562 | 0.946  | 0.828 | 0.698  | 0.034 |
| 1386901_at   | NM_031561 | similar to fatty acid translocase/CD36 (predicted)                                       | RGD1562323_predicted | 1.122  | 0.696 | 0.665  | 0.039 | 0.937  | 0.683 | 0.685  | 0.042 |
| 1389320_at   | BF419881  | similar to F-box only protein 25                                                         | LOC364637            | 0.444  | 0.004 | 0.277  | 0.005 | 0.647  | 0.008 | 0.394  | 0.007 |
| 1375041_at   | AI599362  | Similar to F-box only protein 27 (predicted)                                             | RGD1563982_predicted | 9.994  | 0.022 | 6.968  | 0.000 | 16.757 | 0.000 | 12.598 | 0.004 |
| 1376714_at   | AI236072  | similar to F-box protein FBL2                                                            | RGD1308119           | 1.369  | 0.124 | 1.762  | 0.018 | 1.260  | 0.182 | 1.566  | 0.002 |
| 1379559_at   | BF400293  | Similar to F-box protein FBL2                                                            | RGD1308119           | 1.463  | 0.698 | 0.993  | 0.512 | 1.013  | 0.965 | 1.102  | 0.553 |
| 1380192_at   | AI105297  | similar to F-box protein FBL2                                                            | RGD1308119           | 1.497  | 0.946 | 1.222  | 0.304 | 1.553  | 0.442 | 0.972  | 0.899 |
| 1384457_at   | AI030755  | similar to Fbxw17 protein (predicted)                                                    | RGD1561663_predicted | 7.005  | 0.001 | 7.067  | 0.003 | 24.708 | 0.000 | 6.195  | 0.007 |
| 1389783_s_at | BI280865  | similar to Fc fragment of IgG binding protein; IgG Fc binding protein                    | RGD1311906           | 0.236  | 0.013 | 0.361  | 0.009 | 0.213  | 0.011 | 0.312  | 0.093 |
| 1392886_a_at | AI453967  | similar to FCRL                                                                          | RGD1306176           | 0.996  | 0.990 | 1.098  | 0.573 | 1.240  | 0.677 | 1.126  | 0.545 |
| 1374433_at   | BI301532  | Similar to Ferritin light chain (Ferritin L subunit) (predicted)                         | RGD1563902_predicted | 2.576  | 0.009 | 4.770  | 0.000 | 1.701  | 0.050 | 4.644  | 0.005 |
| 1372420_at   | AI408084  | similar to FKSG24 (predicted)                                                            | RGD1308064_predicted | 0.591  | 0.004 | 1.266  | 0.190 | 0.502  | 0.002 | 1.455  | 0.024 |
| 1392621_at   | AI231159  | similar to FKSG26 protein (predicted)                                                    | RGD1309054_predicted | 0.688  | 0.839 | 0.931  | 0.147 | 0.269  | 0.075 | 0.839  | 0.634 |
| 1391346_at   | BG373537  | similar to FKSG26 protein (predicted)                                                    | RGD1309054_predicted | 1.036  | 0.872 | 0.989  | 0.861 | 1.006  | 0.726 | 0.948  | 0.529 |
| 1389351_at   | BM387864  | similar to FLI-LRR associated protein-1                                                  | LOC367314            | 4.547  | 0.000 | 4.117  | 0.001 | 2.814  | 0.080 | 4.307  | 0.001 |
| 1381094_at   | BG376156  | Similar to FLJ00022 protein (predicted)                                                  | RGD1309709_predicted | 1.224  | 0.124 | 1.005  | 0.974 | 0.860  | 0.832 | 0.810  | 0.080 |
| 1367548_at   | BE118462  | similar to FLJ00052 protein (predicted)                                                  | RGD1305986_predicted | 0.926  | 0.522 | 1.206  | 0.157 | 1.070  | 0.193 | 1.210  | 0.555 |
| 1373954_at   | BG381520  | Similar to FLJ00052 protein (predicted)                                                  | RGD1305986_predicted | 0.979  | 0.557 | 0.789  | 0.523 | 1.309  | 0.139 | 0.677  | 0.399 |
| 1380671_at   | BF409069  | Similar to FLJ00251 protein (predicted)                                                  | RGD1311619_predicted | 1.591  | 0.277 | 2.052  | 0.167 | 1.623  | 0.016 | 1.660  | 0.599 |
| 1382660_at   | AA923866  | Similar to FLJ20298 protein isoform a (predicted)                                        | RGD1563084_predicted | 0.513  | 0.287 | 0.960  | 0.204 | 0.780  | 0.160 | 0.773  | 0.055 |
| 1376832_at   | AA800763  | similar to FLJ20689 (predicted)                                                          | RGD1308907_predicted | 0.897  | 0.674 | 0.777  | 0.247 | 0.942  | 0.869 | 1.106  | 0.316 |
| 1378853_at   | BG377853  | similar to FLJ22405 protein (predicted)                                                  | RGD1304842_predicted | 0.975  | 0.435 | 1.186  | 0.963 | 6.563  | 0.017 | 1.017  | 0.857 |
| 1379059_at   | BG373522  | similar to FLJ23471 protein (predicted)                                                  | RGD1307875_predicted | 35.068 | 0.000 | 16.502 | 0.002 | 1.047  | 0.595 | 3.210  | 0.023 |

|              |          |                                                                                                                            |                      |        |       |        |       |        |       |        |       |
|--------------|----------|----------------------------------------------------------------------------------------------------------------------------|----------------------|--------|-------|--------|-------|--------|-------|--------|-------|
| 1371421_at   | BM391873 | Similar to FLJ40243 protein                                                                                                | RGD1305413           | 0.250  | 0.078 | 0.338  | 0.001 | 0.251  | 0.005 | 0.422  | 0.001 |
| 1379228_at   | BF418531 | similar to flt3 ligand (predicted)                                                                                         | RGD1560528_predicted | 0.879  | 0.787 | 1.573  | 0.040 | 2.310  | 0.008 | 1.740  | 0.029 |
| 1372652_at   | BM386443 | similar to forkhead protein AFXH (predicted)                                                                               | RGD1561201_predicted | 0.657  | 0.836 | 0.212  | 0.000 | 0.922  | 0.239 | 0.358  | 0.015 |
| 1378477_a_at | BI281796 | similar to Formin homology 2 domain containing 1                                                                           | LOC291964            | 0.421  | 0.083 | 0.765  | 0.056 | 0.831  | 0.161 | 0.889  | 0.487 |
| 1395764_at   | BF398145 | Similar to Formin-like 2 isoform B (predicted)                                                                             | RGD1560248_predicted | 2.580  | 0.405 | 1.382  | 0.058 | 3.335  | 0.033 | 1.437  | 0.113 |
| 1394141_at   | AI638976 | Similar to FoxB2 protein                                                                                                   | LOC502382            | 1.124  | 0.305 | 0.747  | 0.972 | 1.117  | 0.289 | 1.007  | 0.994 |
| 1376580_at   | BG375952 | similar to frataxin (predicted)                                                                                            | RGD1565754_predicted | 0.472  | 0.089 | 1.494  | 0.246 | 0.609  | 0.768 | 1.966  | 0.116 |
| 1383654_a_at | BE112523 | similar to fructosamine-3-kinase (predicted)                                                                               | Fnsk_predicted       | 0.162  | 0.012 | 0.154  | 0.021 | 0.084  | 0.003 | 0.339  | 0.109 |
| 1398342_at   | BF549775 | similar to Fus1 protein                                                                                                    | LOC501052            | 0.561  | 0.150 | 1.302  | 0.326 | 0.509  | 0.001 | 0.974  | 0.384 |
| 1381882_at   | AI072357 | similar to FYVE, RhoGEF and PH domain containing 6 (predicted)                                                             | RGD1565609_predicted | 17.944 | 0.018 | 23.730 | 0.000 | 10.149 | 0.025 | 8.838  | 0.008 |
| 1397223_at   | AI231513 | Similar to FYVE, RhoGEF and PH domain containing 6 (predicted)                                                             | RGD1565609_predicted | 1.927  | 0.022 | 3.232  | 0.044 | 1.821  | 0.016 | 1.253  | 0.361 |
| 1375588_at   | BF405893 | similar to FYVE, RhoGEF and PH domain containing 6 (predicted)                                                             | RGD1565609_predicted | 1.009  | 0.972 | 0.996  | 0.990 | 1.100  | 0.484 | 1.000  | 0.955 |
| 1396280_at   | BI277872 | similar to G patch domain and KOW motifs (predicted)                                                                       | RGD1560419_predicted | 2.074  | 0.049 | 2.038  | 0.077 | 1.380  | 0.072 | 3.084  | 0.004 |
| 1379827_at   | BG376569 | similar to G protein pathway suppressor 2                                                                                  | LOC497941            | 0.904  | 0.965 | 1.171  | 0.015 | 0.899  | 0.218 | 1.206  | 0.083 |
| 1389451_at   | AI179502 | similar to G protein-coupled receptor 172B (predicted)                                                                     | RGD1560410_predicted | 0.498  | 0.080 | 0.766  | 0.101 | 0.930  | 0.911 | 0.723  | 0.212 |
| 1389345_at   | AI231218 | Similar to G2 (predicted)                                                                                                  | RGD1310754_predicted | 0.851  | 0.496 | 0.621  | 0.004 | 1.153  | 0.844 | 0.757  | 0.020 |
| 1395633_at   | BF391829 | Similar to G2 (predicted)                                                                                                  | RGD1310754_predicted | 1.016  | 0.604 | 1.005  | 0.875 | 2.102  | 0.079 | 0.997  | 0.833 |
| 1374533_at   | AI234190 | similar to GA binding protein transcription factor, beta subunit 2 (GABPB2) (predicted)                                    | RGD1560391_predicted | 2.692  | 0.002 | 1.552  | 0.122 | 3.393  | 0.000 | 1.498  | 0.022 |
| 1394708_at   | BF288532 | Similar to GA binding protein transcription factor, beta subunit 2 (GABPB2) (predicted)                                    | RGD1560391_predicted | 1.016  | 0.995 | 0.975  | 0.988 | 0.978  | 0.925 | 0.982  | 0.918 |
| 1376633_at   | AW529927 | Similar to Gamma-parvin (predicted)                                                                                        | RGD1562984_predicted | 0.905  | 0.800 | 0.253  | 0.001 | 1.001  | 0.863 | 0.300  | 0.010 |
| 1386226_at   | AA893682 | Similar to Gamma-tubulin complex component 4 (GCP-4) (predicted)                                                           | RGD1306924_predicted | 0.970  | 0.590 | 0.857  | 0.111 | 1.070  | 0.051 | 0.889  | 0.118 |
| 1388429_at   | BM384085 | similar to gem (nuclear organelle) associated protein 7                                                                    | LOC499391            | 1.755  | 0.344 | 1.344  | 0.439 | 1.064  | 0.515 | 1.257  | 0.326 |
| 1371376_at   | AI072448 | similar to Gene model 461 (predicted)                                                                                      | RGD1565596_predicted | 0.981  | 0.334 | 0.976  | 0.748 | 0.972  | 0.307 | 0.979  | 0.768 |
| 1389990_at   | BE329244 | Similar to Gene model 609 (predicted)                                                                                      | RGD1563727_predicted | 1.401  | 0.883 | 1.340  | 0.356 | 1.367  | 0.237 | 1.090  | 0.082 |
| 1367509_at   | AI231812 | Similar to general transcription factor IIIH, polypeptide 5 (predicted)                                                    | RGD1560991_predicted | 0.682  | 0.278 | 0.785  | 0.040 | 0.583  | 0.040 | 0.812  | 0.116 |
| 1372602_at   | BI295979 | Similar to genethonin 1                                                                                                    | RGD1311800           | 1.681  | 0.196 | 13.726 | 0.000 | 1.887  | 0.044 | 11.316 | 0.006 |
| 1383337_at   | AA963875 | Similar to genetic suppressor element 1 (predicted)                                                                        | RGD1562686_predicted | 0.892  | 0.197 | 0.482  | 0.024 | 0.798  | 0.524 | 0.625  | 0.027 |
| 1389481_at   | BI282891 | similar to GI:13385412-like protein splice form I                                                                          | RGD735065            | 0.798  | 0.738 | 0.748  | 0.110 | 0.647  | 0.000 | 0.853  | 0.254 |
| 1380410_at   | AI043958 | Similar to GLI pathogenesis-related 2                                                                                      | LOC502947            | 25.602 | 0.000 | 7.859  | 0.001 | 30.239 | 0.000 | 10.810 | 0.001 |
| 1375909_at   | BI285792 | similar to glutathione transferase GSTM7-7                                                                                 | MGC108896            | 0.582  | 0.038 | 1.098  | 0.665 | 0.832  | 0.050 | 1.118  | 0.695 |
| 1374412_at   | BF557666 | Similar to glyceraldehyde-3-phosphate dehydrogenase (predicted)                                                            | RGD1559570_predicted | 1.394  | 0.272 | 1.318  | 0.220 | 1.893  | 0.078 | 1.154  | 0.379 |
| 1390755_at   | BE105876 | similar to Gnefr protein (predicted)                                                                                       | RGD1563497_predicted | 1.738  | 0.064 | 5.094  | 0.007 | 1.614  | 0.055 | 4.486  | 0.003 |
| 1394347_at   | BF568007 | similar to golgi autoantigen golgin subtype a4; tGolgin-1                                                                  | LOC501069            | 0.454  | 0.057 | 1.351  | 0.500 | 0.356  | 0.019 | 0.979  | 0.119 |
| 1398965_at   | BF388772 | similar to golgi autoantigen golgin subtype a4; tGolgin-1                                                                  | LOC501069            | 1.003  | 0.868 | 1.335  | 0.004 | 1.002  | 0.422 | 1.275  | 0.019 |
| 1392517_at   | AI102175 | similar to Golgin 45 (Basic leucine zipper nuclear factor 1)                                                               | LOC498266            | 1.054  | 0.786 | 1.765  | 0.085 | 0.740  | 0.305 | 1.517  | 0.148 |
| 1385077_at   | BE097285 | similar to golgi-specific brefeldin A-resistance guanine nucleotide exchange factor 1 (predicted)                          | RGD1307160_predicted | 0.943  | 0.278 | 0.979  | 0.832 | 0.910  | 0.359 | 0.859  | 0.368 |
| 1389044_at   | BF283388 | similar to golgi-specific brefeldin A-resistance guanine nucleotide exchange factor 1 (predicted)                          | RGD1307160_predicted | 1.036  | 0.465 | 1.020  | 0.100 | 0.684  | 0.586 | 0.975  | 0.505 |
| 1390611_at   | BF406297 | similar to golgi-specific brefeldin A-resistance guanine nucleotide exchange factor 1 (predicted)                          | RGD1307160_predicted | 1.605  | 0.730 | 1.029  | 0.811 | 0.910  | 0.996 | 1.137  | 0.335 |
| 1379452_at   | AI411492 | similar to growth arrest-specific protein 2 - mouse (predicted)                                                            | RGD1563167_predicted | 0.888  | 0.721 | 0.247  | 0.001 | 0.653  | 0.206 | 0.326  | 0.057 |
| 1374505_at   | AI411031 | similar to growth hormone-inducible soluble protein (predicted)                                                            | RGD1563076_predicted | 1.052  | 0.785 | 0.886  | 0.038 | 1.577  | 0.004 | 1.100  | 0.787 |
| 1381025_at   | BF410266 | Similar to growth/differentiation factor GDF-3 precursor - mouse (predicted)                                               | RGD1559624_predicted | 1.167  | 0.681 | 0.876  | 0.449 | 2.556  | 0.043 | 1.029  | 0.154 |
| 1377008_at   | BI296868 | similar to GTL2, imprinted maternally expressed untranslated (predicted)                                                   | RGD1566401_predicted | 1.004  | 0.986 | 0.843  | 0.746 | 1.321  | 0.793 | 0.802  | 0.013 |
| 1373572_at   | BF282247 | similar to GTP binding protein 5                                                                                           | LOC296462            | 0.315  | 0.016 | 0.666  | 0.155 | 0.534  | 0.019 | 0.767  | 0.118 |
| 1381791_at   | AA818889 | Similar to GTPase activating protein testicular GAP1 (predicted)                                                           | RGD1562031_predicted | 1.222  | 0.490 | 0.986  | 0.729 | 5.073  | 0.109 | 0.945  | 0.196 |
| 1395899_at   | AW921250 | Similar to GTPase activating protein testicular GAP1 (predicted)                                                           | RGD1565009_predicted | 0.925  | 0.632 | 0.772  | 0.074 | 1.238  | 0.985 | 0.797  | 0.103 |
| 1396765_at   | BF390955 | Similar to GTPase activating RANGAP domain-like 3 (predicted)                                                              | RGD1564019_predicted | 0.577  | 0.040 | 1.087  | 0.715 | 0.435  | 0.030 | 1.018  | 0.420 |
| 1398492_at   | BF395819 | Similar to Guanine nucleotide-binding protein beta subunit 2-like 1 (Receptor of activated protein kinase C 1) (predicted) | RGD1562180_predicted | 0.950  | 0.842 | 0.708  | 0.859 | 1.001  | 0.086 | 0.653  | 0.204 |
| 1376990_at   | BE118704 | Similar to HCDI protein (predicted)                                                                                        | RGD1309307_predicted | 2.557  | 0.004 | 1.618  | 0.011 | 3.624  | 0.000 | 2.000  | 0.003 |
| 1393673_at   | BE120005 | similar to HCDI protein (predicted)                                                                                        | RGD1309307_predicted | 1.297  | 0.027 | 0.971  | 0.726 | 1.896  | 0.019 | 0.996  | 0.982 |
| 1376222_at   | AI710677 | similar to HCDI protein (predicted)                                                                                        | RGD1309307_predicted | 0.462  | 0.027 | 0.503  | 0.034 | 0.694  | 0.021 | 0.372  | 0.081 |
| 1389021_at   | BF284746 | similar to HCV NS3-transactivated protein 1 (predicted)                                                                    | RGD1306332_predicted | 0.703  | 0.079 | 1.352  | 0.003 | 0.564  | 0.005 | 1.284  | 0.014 |
| 1373811_at   | AA942728 | similar to heat shock protein 8 (predicted)                                                                                | RGD1560590_predicted | 2.440  | 0.057 | 1.042  | 0.181 | 3.097  | 0.043 | 0.974  | 0.901 |
| 1392259_at   | AI574925 | similar to HECT domain containing 1 (predicted)                                                                            | RGD1561653_predicted | 1.211  | 0.285 | 1.632  | 0.093 | 1.199  | 0.859 | 0.836  | 0.497 |
| 1383615_a_at | AI059295 | similar to HECT domain containing 1 (predicted)                                                                            | RGD1561653_predicted | 1.117  | 0.489 | 1.046  | 0.771 | 1.001  | 0.997 | 1.247  | 0.991 |
| 1372394_at   | AI175474 | similar to HECT domain containing 1 (predicted)                                                                            | RGD1561653_predicted | 0.942  | 0.497 | 1.278  | 0.022 | 0.995  | 0.941 | 1.210  | 0.001 |
| 1393611_at   | AA964538 | similar to Hel308 protein                                                                                                  | LOC289471            | 1.888  | 0.172 | 0.455  | 0.047 | 0.651  | 0.104 | 0.327  | 0.018 |
| 1374921_at   | BI274548 | similar to helicase-like protein NHL isoform 2                                                                             | RGD1306721           | 0.373  | 0.001 | 0.612  | 0.402 | 0.655  | 0.018 | 0.564  | 0.028 |
| 1389158_at   | BE329196 | Similar to helicase-like protein NHL isoform 2                                                                             | RGD1306721           | 0.910  | 0.088 | 1.002  | 0.732 | 0.891  | 0.361 | 1.025  | 0.682 |
| 1377532_at   | AW434782 | similar to Hepatocellular carcinoma-associated antigen 58 homolog (predicted)                                              | RGD1305020_predicted | 1.534  | 0.160 | 1.267  | 0.166 | 1.497  | 0.037 | 1.294  | 0.505 |
| 1376931_at   | BG380736 | similar to Hepatocellular carcinoma-associated antigen 58 homolog (predicted)                                              | RGD1305020_predicted | 1.236  | 0.313 | 2.074  | 0.042 | 1.167  | 0.242 | 1.699  | 0.171 |



|              |          |                                                                                                                                     |                      |       |       |        |       |       |       |        |       |
|--------------|----------|-------------------------------------------------------------------------------------------------------------------------------------|----------------------|-------|-------|--------|-------|-------|-------|--------|-------|
| 1376270_at   | AI059493 | Similar to HESB like domain containing 1 (predicted)                                                                                | RGD1563216_predicted | 1.079 | 0.538 | 1.292  | 0.408 | 0.753 | 0.256 | 1.007  | 0.842 |
| 1388446_at   | BF397834 | similar to heterogeneous nuclear ribonucleoprotein A0 (predicted)                                                                   | RGD1563684_predicted | 0.724 | 0.278 | 0.714  | 0.008 | 0.451 | 0.005 | 0.709  | 0.023 |
| 1375772_at   | BI296534 | Similar to Heterogeneous nuclear ribonucleoprotein A1 (Helix-destabilizing protein (Topoisomerase-inhibitor suppressed) (predicted) | RGD1559977_predicted | 0.983 | 0.752 | 1.016  | 0.176 | 1.328 | 0.463 | 1.054  | 0.058 |
| 1374181_at   | BF290678 | similar to heterogeneous nuclear ribonucleoprotein G - human                                                                        | LOC302855            | 0.369 | 0.015 | 0.517  | 0.016 | 0.428 | 0.154 | 0.631  | 0.141 |
| 1395523_at   | AW523475 | Similar to heterogeneous nuclear ribonucleoprotein G - human                                                                        | LOC302855            | 0.894 | 0.784 | 0.491  | 0.076 | 0.626 | 0.604 | 1.212  | 0.257 |
| 1371887_at   | BF398549 | similar to high mobility group protein homolog HMG4 (predicted)                                                                     | RGD1564407_predicted | 0.431 | 0.001 | 0.717  | 0.099 | 0.898 | 0.268 | 0.345  | 0.049 |
| 1382316_at   | BE118866 | similar to histone cell cycle regulation defective homolog A isoform 1                                                              | LOC363849            | 0.812 | 0.256 | 1.026  | 0.156 | 1.650 | 0.306 | 0.825  | 0.994 |
| 1390384_at   | AA875257 | similar to Histone H2A.x (H2a/x) (predicted)                                                                                        | RGD1566119_predicted | 0.508 | 0.071 | 0.916  | 0.393 | 0.373 | 0.026 | 0.698  | 0.649 |
| 1386059_at   | BF284475 | Similar to histone H2b-613 (predicted)                                                                                              | RGD1562346_predicted | 1.014 | 0.205 | 0.591  | 0.012 | 0.746 | 0.338 | 0.729  | 0.046 |
| 1393488_at   | AI103612 | Similar to HIV-1 Rev binding protein                                                                                                | LOC363266            | 1.348 | 0.183 | 1.961  | 0.623 | 1.025 | 0.410 | 1.199  | 0.651 |
| 1396286_at   | BG372956 | Similar to HIV-1 Rev binding protein                                                                                                | LOC363266            | 0.592 | 0.207 | 0.671  | 0.590 | 0.974 | 0.247 | 0.661  | 0.891 |
| 1382533_at   | AI012699 | similar to HIV-1 Rev binding protein                                                                                                | LOC363266            | 1.247 | 0.798 | 1.266  | 0.777 | 0.919 | 0.643 | 0.894  | 0.474 |
| 1383158_at   | AI575747 | similar to HIV-1 Rev binding protein                                                                                                | LOC363266            | 0.936 | 0.877 | 1.042  | 0.651 | 0.742 | 0.136 | 1.041  | 0.542 |
| 1382245_at   | BF397964 | Similar to HMG-1 (predicted)                                                                                                        | RGD1559799_predicted | 1.257 | 0.348 | 1.294  | 0.578 | 1.036 | 0.883 | 1.167  | 0.973 |
| 1388929_at   | AI011716 | Similar to HMG-1 (predicted)                                                                                                        | RGD1559799_predicted | 0.972 | 0.787 | 0.815  | 0.314 | 0.895 | 0.174 | 0.831  | 0.068 |
| 1373447_at   | BF281350 | similar to HN1-like protein                                                                                                         | RGD1305117           | 1.021 | 0.082 | 1.571  | 0.008 | 1.493 | 0.012 | 1.349  | 0.007 |
| 1394976_at   | AI008980 | Similar to HN1-like protein                                                                                                         | RGD1305117           | 2.009 | 0.800 | 1.597  | 0.124 | 1.432 | 0.379 | 1.771  | 0.895 |
| 1388504_at   | AI231313 | similar to HR21spA                                                                                                                  | MGC116373            | 0.746 | 0.266 | 0.736  | 0.001 | 0.806 | 0.088 | 0.968  | 0.767 |
| 1382823_at   | AI070008 | Similar to HR21spA                                                                                                                  | MGC116373            | 1.691 | 0.447 | 15.496 | 0.000 | 1.222 | 0.473 | 12.913 | 0.000 |
| 1379700_at   | AA956376 | similar to HS1 binding protein 3 (predicted)                                                                                        | RGD1311331_predicted | 0.971 | 0.242 | 1.063  | 0.642 | 0.706 | 0.115 | 1.004  | 0.300 |
| 1396499_at   | BF403327 | similar to HSD-29 (predicted)                                                                                                       | RGD1559656_predicted | 1.043 | 0.923 | 1.083  | 0.204 | 1.075 | 0.593 | 1.031  | 0.775 |
| 1379778_at   | AI713278 | similar to HSPC043 protein (predicted)                                                                                              | RGD1307983_predicted | 0.988 | 0.507 | 2.935  | 0.000 | 1.456 | 0.057 | 2.910  | 0.023 |
| 1388346_at   | BM386531 | similar to HSPC171 protein (predicted)                                                                                              | RGD1560953_predicted | 0.621 | 0.665 | 0.624  | 0.033 | 0.632 | 0.110 | 0.564  | 0.005 |
| 1377730_at   | BF290890 | similar to HSPC288 (predicted)                                                                                                      | RGD1310769_predicted | 0.589 | 0.209 | 0.769  | 0.000 | 0.829 | 0.017 | 0.929  | 0.216 |
| 1375354_at   | BE098366 | Similar to HT014 (predicted)                                                                                                        | RGD1308048_predicted | 0.607 | 0.091 | 1.219  | 0.286 | 0.549 | 0.064 | 0.980  | 0.076 |
| 1374554_at   | BF281325 | similar to HT014 (predicted)                                                                                                        | RGD1308048_predicted | 0.592 | 0.530 | 1.958  | 0.007 | 0.600 | 0.070 | 1.746  | 0.060 |
| 1374882_at   | AW433860 | similar to HT021 (predicted)                                                                                                        | RGD1306063_predicted | 0.598 | 0.066 | 0.597  | 0.056 | 0.896 | 0.553 | 0.865  | 0.784 |
| 1379939_a_at | AW526107 | Similar to HT021 (predicted)                                                                                                        | RGD1306063_predicted | 0.778 | 0.465 | 1.911  | 0.031 | 1.000 | 0.524 | 3.340  | 0.002 |
| 1397448_at   | BE108434 | Similar to HT021 (predicted)                                                                                                        | RGD1306063_predicted | 1.260 | 0.567 | 1.001  | 0.880 | 1.003 | 0.968 | 0.992  | 0.624 |
| 1380407_at   | AI179886 | similar to HTGN29 protein; keratinocytes associated transmembrane protein 2                                                         | RGD1310352           | 0.608 | 0.037 | 0.418  | 0.073 | 0.589 | 0.059 | 0.331  | 0.020 |
| 1371619_at   | BI296718 | similar to HTGN29 protein; keratinocytes associated transmembrane protein 2                                                         | RGD1310352           | 0.521 | 0.359 | 0.423  | 0.002 | 0.521 | 0.188 | 0.387  | 0.001 |
| 1375899_at   | BF283736 | Similar to HTPAP protein (predicted)                                                                                                | RGD1559978_predicted | 1.524 | 0.003 | 1.836  | 0.008 | 1.751 | 0.051 | 1.777  | 0.004 |
| 1373160_at   | BM388961 | similar to HTPAP protein (predicted)                                                                                                | RGD1559978_predicted | 0.690 | 0.066 | 0.926  | 0.259 | 0.596 | 0.071 | 0.935  | 0.699 |
| 1385030_at   | BE097270 | Similar to HTPAP protein (predicted)                                                                                                | RGD1559978_predicted | 0.937 | 0.299 | 1.021  | 0.466 | 1.174 | 0.430 | 1.025  | 0.903 |
| 1379540_at   | BM383595 | Similar to HTPAP protein (predicted)                                                                                                | RGD1559978_predicted | 1.329 | 0.312 | 1.335  | 0.088 | 1.092 | 0.182 | 1.275  | 0.090 |
| 1390667_at   | BF408543 | similar to Hypothetical 55.1 kDa protein F09G8.5 in chromosome III (predicted)                                                      | RGD1565856_predicted | 0.533 | 0.002 | 0.883  | 0.707 | 0.409 | 0.003 | 0.585  | 0.404 |
| 1395391_at   | BF412774 | similar to hypothetical gene supported by AK029636; BC048562                                                                        | LOC498677            | 0.971 | 0.977 | 0.994  | 0.862 | 0.999 | 0.090 | 1.000  | 0.677 |
| 1382834_at   | AI070996 | Similar to hypothetical gene supported by AK044523 (predicted)                                                                      | RGD1562175_predicted | 1.002 | 0.900 | 0.992  | 0.970 | 1.012 | 0.803 | 0.988  | 0.935 |
| 1380118_at   | BI275569 | similar to hypothetical gene supported by AK085276 (predicted)                                                                      | RGD1562252_predicted | 0.904 | 0.445 | 0.956  | 0.792 | 1.197 | 0.716 | 1.041  | 0.431 |
| 1398608_at   | BG371578 | similar to hypothetical gene supported by BC007071                                                                                  | RGD1311868           | 1.010 | 0.887 | 1.468  | 0.117 | 1.061 | 0.577 | 1.408  | 0.009 |
| 1388946_at   | AI233763 | similar to hypothetical p38 protein (predicted)                                                                                     | RGD1311910_predicted | 0.737 | 0.029 | 0.699  | 0.274 | 0.523 | 0.004 | 0.587  | 0.103 |
| 1382807_at   | BE100287 | similar to hypothetical protein                                                                                                     | RGD1310450           | 0.683 | 0.001 | 0.720  | 0.051 | 1.109 | 0.841 | 0.805  | 0.054 |
| 1388532_at   | AI599496 | similar to hypothetical protein                                                                                                     | RGD1310571           | 0.385 | 0.013 | 1.323  | 0.868 | 0.308 | 0.002 | 1.094  | 0.151 |
| 1393011_at   | BE104363 | similar to hypothetical protein                                                                                                     | LOC361041            | 0.483 | 0.050 | 0.131  | 0.000 | 0.870 | 0.169 | 0.190  | 0.043 |
| 1377615_at   | AI112395 | similar to hypothetical protein                                                                                                     | LOC304280            | 0.575 | 0.089 | 0.439  | 0.001 | 0.495 | 0.021 | 0.444  | 0.000 |
| 1373982_at   | BM385377 | similar to hypothetical protein                                                                                                     | RGD1306595           | 0.485 | 0.206 | 1.121  | 0.556 | 0.433 | 0.007 | 1.056  | 0.979 |
| 1389788_at   | AW522732 | similar to hypothetical protein                                                                                                     | RGD1307336           | 0.667 | 0.249 | 0.950  | 0.847 | 0.641 | 0.443 | 1.087  | 0.605 |
| 1380320_at   | AI176284 | similar to hypothetical protein                                                                                                     | RGD1311361           | 0.943 | 0.433 | 3.409  | 0.005 | 0.665 | 0.276 | 2.966  | 0.042 |
| 1386733_at   | BF544390 | Similar to hypothetical protein (predicted)                                                                                         | RGD1306694_predicted | 1.492 | 0.001 | 0.988  | 0.966 | 1.085 | 0.161 | 0.897  | 0.352 |
| 1383494_at   | BF414338 | similar to hypothetical protein (predicted)                                                                                         | RGD1562788_predicted | 1.294 | 0.004 | 0.904  | 0.969 | 0.959 | 0.771 | 0.965  | 0.688 |
| 1375429_at   | BI294768 | Similar to hypothetical protein (predicted)                                                                                         | RGD1562784_predicted | 0.647 | 0.030 | 0.670  | 0.013 | 0.607 | 0.003 | 0.614  | 0.007 |
| 1377232_at   | BF406608 | similar to hypothetical protein (predicted)                                                                                         | RGD1305269_predicted | 0.517 | 0.033 | 0.290  | 0.005 | 0.455 | 0.160 | 0.224  | 0.001 |
| 1390414_at   | BI296515 | similar to hypothetical protein (predicted)                                                                                         | RGD1308489_predicted | 1.677 | 0.038 | 2.276  | 0.087 | 2.803 | 0.084 | 2.226  | 0.106 |
| 1377868_at   | AW530090 | similar to hypothetical protein (predicted)                                                                                         | RGD1561019_predicted | 0.540 | 0.043 | 0.631  | 0.104 | 0.564 | 0.007 | 0.684  | 0.026 |
| 1376546_at   | BE120498 | similar to hypothetical protein (predicted)                                                                                         | RGD1565432_predicted | 0.442 | 0.044 | 0.577  | 0.004 | 0.494 | 0.013 | 0.435  | 0.052 |
| 1385083_at   | BG378253 | similar to hypothetical protein (predicted)                                                                                         | RGD1563056_predicted | 0.509 | 0.086 | 0.948  | 0.849 | 0.565 | 0.106 | 0.910  | 0.867 |
| 1374328_at   | BF403886 | similar to hypothetical protein (predicted)                                                                                         | RGD1566393_predicted | 1.467 | 0.136 | 1.602  | 0.062 | 1.270 | 0.184 | 1.704  | 0.029 |
| 1389194_at   | AI406491 | Similar to hypothetical protein (predicted)                                                                                         | RGD1565536_predicted | 0.565 | 0.138 | 0.474  | 0.007 | 0.440 | 0.012 | 0.527  | 0.023 |
| 1381150_at   | BF410638 | Similar to hypothetical protein (predicted)                                                                                         | RGD1305239_predicted | 0.799 | 0.173 | 0.967  | 0.084 | 0.858 | 0.986 | 0.791  | 0.425 |
| 1386061_at   | BF523573 | similar to hypothetical protein (predicted)                                                                                         | RGD1306694_predicted | 1.101 | 0.231 | 0.677  | 0.029 | 1.016 | 0.224 | 0.783  | 0.252 |





|              |          |                                                                                       |                         |        |       |       |       |        |       |        |       |
|--------------|----------|---------------------------------------------------------------------------------------|-------------------------|--------|-------|-------|-------|--------|-------|--------|-------|
| 1373077_at   | BI285902 | similar to hypothetical protein D11Ert497e                                            | RGD1308696              | 0.866  | 0.737 | 0.907 | 0.384 | 0.571  | 0.041 | 0.917  | 0.103 |
| 1370298_at   | AF052042 | similar to hypothetical protein D11Ert499e (predicted)                                | RGD1564337_predicted    | 0.874  | 0.654 | 1.154 | 0.566 | 0.440  | 0.026 | 1.124  | 0.316 |
| 1372713_at   | BE109614 | Similar to hypothetical protein D12Ert4771e                                           | RGD1309550              | 1.336  | 0.121 | 0.972 | 0.541 | 1.199  | 0.051 | 1.148  | 0.095 |
| 1374913_at   | BI295047 | similar to hypothetical protein D12Ert4771e                                           | RGD1309550              | 1.827  | 0.222 | 1.249 | 0.890 | 0.939  | 0.962 | 1.171  | 0.781 |
| 1397483_at   | BE104832 | Similar to hypothetical protein D12Ert4771e                                           | RGD1309550              | 0.935  | 0.708 | 0.893 | 0.485 | 0.860  | 0.857 | 0.979  | 0.583 |
| 1372188_at   | BM392171 | Similar to hypothetical protein D15Ert4785e                                           | MGC114417               | 1.352  | 0.554 | 1.396 | 0.342 | 0.943  | 0.078 | 1.326  | 0.302 |
| 1393609_at   | AA964480 | Similar to hypothetical protein D15Ert4785e                                           | MGC114417               | 1.098  | 0.730 | 1.046 | 0.871 | 1.902  | 0.628 | 1.007  | 0.770 |
| 1388336_at   | AI411514 | Similar to hypothetical protein D2Ert4391e (predicted)                                | RGD1310685_predicted    | 0.627  | 0.297 | 0.514 | 0.033 | 0.799  | 0.151 | 0.719  | 0.058 |
| 1376719_at   | AI172189 | similar to hypothetical protein D4Ert489e                                             | RGD1305703              | 1.130  | 0.026 | 0.974 | 0.645 | 1.215  | 0.093 | 0.939  | 0.499 |
| 1383715_at   | BI284371 | similar to hypothetical protein D4Ert489e                                             | RGD1305703              | 0.894  | 0.981 | 1.215 | 0.359 | 0.782  | 0.313 | 1.014  | 0.144 |
| 1388790_at   | BM384998 | similar to hypothetical protein D5Ert433e                                             | RGD1310857              | 0.454  | 0.098 | 1.003 | 0.314 | 0.502  | 0.024 | 0.907  | 0.767 |
| 1382818_at   | AI177067 | similar to hypothetical protein D630010C10                                            | RGD1309752              | 0.923  | 0.293 | 0.922 | 0.462 | 0.601  | 0.108 | 0.897  | 0.007 |
| 1397259_at   | BF291133 | similar to hypothetical protein D630010C10                                            | RGD1309752              | 0.763  | 0.325 | 1.084 | 0.513 | 1.144  | 0.302 | 1.060  | 0.145 |
| 1385108_at   | AW524173 | Similar to hypothetical protein D630010C10                                            | RGD1309752              | 1.334  | 0.508 | 0.733 | 0.082 | 1.258  | 0.125 | 0.685  | 0.027 |
| 1378860_at   | AW525986 | Similar to hypothetical protein D930020E02 (predicted)                                | RGD1562973_predicted    | 0.468  | 0.013 | 0.185 | 0.010 | 1.007  | 0.997 | 0.516  | 0.010 |
| 1385558_at   | AW532330 | Similar to hypothetical protein D930024E11 (predicted)                                | RGD1561304_predicted    | 1.036  | 0.289 | 0.206 | 0.038 | 0.938  | 0.025 | 0.393  | 0.033 |
| 1389386_at   | AI170759 | similar to hypothetical protein DKFZp313N0621 (predicted)                             | RGD1560717_predicted    | 0.812  | 0.093 | 0.904 | 0.340 | 0.408  | 0.252 | 0.559  | 0.000 |
| 1377365_at   | BG372342 | similar to hypothetical protein DKFZp434H2010 (predicted)                             | RGD1311019_predicted    | 2.563  | 0.034 | 1.644 | 0.048 | 2.753  | 0.054 | 1.443  | 0.072 |
| 1384989_at   | BE107398 | similar to hypothetical protein DKFZp434H2010 (predicted)                             | RGD1311019_predicted    | 1.004  | 0.974 | 1.036 | 0.509 | 1.143  | 0.489 | 1.018  | 0.043 |
| 1382399_at   | AW530026 | similar to hypothetical protein DKFZp434K1421                                         | RGD1309863              | 1.058  | 0.242 | 0.989 | 0.943 | 1.073  | 0.134 | 1.264  | 0.974 |
| 1382904_at   | BF397274 | similar to hypothetical protein DKFZp434K1421                                         | RGD1309863              | 0.955  | 0.647 | 1.091 | 0.036 | 1.156  | 0.504 | 1.056  | 0.054 |
| 1373715_at   | BI274516 | similar to hypothetical protein DKFZp434K1815                                         | LOC304396               | 0.962  | 0.874 | 0.953 | 0.706 | 0.795  | 0.454 | 0.864  | 0.741 |
| 1375678_at   | AI412430 | similar to hypothetical protein DKFZp434P0316 (predicted)                             | RGD1562974_predicted    | 2.918  | 0.000 | 1.834 | 0.017 | 3.263  | 0.001 | 1.789  | 0.014 |
| 1397041_at   | BF404629 | Similar to hypothetical protein DKFZp564D0478 (predicted)                             | RGD1304793_predicted    | 1.017  | 0.619 | 1.362 | 0.166 | 1.073  | 0.069 | 0.765  | 0.150 |
| 1376833_at   | AW525740 | similar to hypothetical protein DKFZp564D0478 (predicted)                             | RGD1304793_predicted    | 1.539  | 0.783 | 1.388 | 0.071 | 1.246  | 0.578 | 1.247  | 0.189 |
| 1377995_at   | AA799854 | similar to hypothetical protein DKFZp761D0211                                         | RGD1311484              | 0.800  | 0.009 | 1.257 | 0.022 | 0.463  | 0.035 | 1.012  | 0.156 |
| 1378744_at   | AI412523 | Similar to hypothetical protein DKFZp761D0211                                         | RGD1311484              | 1.423  | 0.257 | 1.668 | 0.560 | 1.200  | 0.170 | 1.048  | 0.526 |
| 1382948_at   | BI296929 | similar to hypothetical protein E130310N06 (predicted)                                | RGD1559882_predicted    | 1.097  | 0.485 | 1.002 | 0.564 | 1.001  | 0.709 | 0.998  | 0.403 |
| 1391819_at   | BM390584 | similar to hypothetical protein ET (predicted)                                        | RGD1307394_predicted    | 1.006  | 0.647 | 2.603 | 0.042 | 0.994  | 0.898 | 1.586  | 0.147 |
| 1382196_at   | BI293505 | Similar to hypothetical protein ET (predicted)                                        | RGD1307394_predicted    | 0.977  | 0.883 | 0.675 | 0.535 | 0.644  | 0.362 | 0.525  | 0.345 |
| 1372222_at   | BI285621 | Similar to hypothetical protein F730001J03 (predicted)                                | RGD1311757_predicted    | 0.539  | 0.376 | 0.575 | 0.002 | 0.563  | 0.049 | 0.502  | 0.023 |
| 1391356_at   | BI282688 | similar to hypothetical protein FLJ10006                                              | RGD1304762              | 1.494  | 0.018 | 2.288 | 0.060 | 1.775  | 0.153 | 2.049  | 0.075 |
| 1372522_at   | AI556235 | similar to hypothetical protein FLJ10154                                              | RGD1310061              | 0.779  | 0.098 | 0.554 | 0.002 | 0.998  | 0.989 | 0.742  | 0.101 |
| 1395516_at   | BG663870 | similar to hypothetical protein FLJ10154                                              | RGD1310061              | 1.001  | 0.997 | 1.198 | 0.033 | 1.730  | 1.000 | 1.129  | 0.072 |
| 1383461_at   | AA946382 | similar to hypothetical protein FLJ10204                                              | RGD1311362              | 1.183  | 0.707 | 1.655 | 0.014 | 0.897  | 0.039 | 1.493  | 0.014 |
| 1374715_at   | BE097245 | similar to hypothetical protein FLJ10233                                              | RGD1309487              | 1.152  | 0.554 | 2.812 | 0.008 | 1.137  | 0.812 | 2.864  | 0.006 |
| 1389192_at   | AA800521 | similar to hypothetical protein FLJ10241                                              | MGC109149               | 0.920  | 0.255 | 1.008 | 0.873 | 0.924  | 0.280 | 0.997  | 0.633 |
| 1375461_at   | BI285588 | similar to hypothetical protein FLJ10241                                              | MGC109149               | 0.810  | 0.441 | 0.545 | 0.063 | 0.991  | 0.994 | 0.853  | 0.231 |
| 1371738_at   | BI287983 | similar to hypothetical protein FLJ10375 (predicted)                                  | RGD1308260_predicted    | 0.969  | 0.433 | 1.115 | 0.302 | 1.030  | 0.355 | 1.187  | 0.108 |
| 1372302_at   | BF284897 | similar to hypothetical protein FLJ10579                                              | RGD1308697              | 4.108  | 0.011 | 2.856 | 0.010 | 5.080  | 0.003 | 4.604  | 0.012 |
| 1395297_at   | AI556097 | similar to hypothetical protein FLJ10652                                              | RGD1309621              | 3.200  | 0.002 | 3.091 | 0.029 | 2.984  | 0.004 | 1.992  | 0.329 |
| 1373143_at   | BM390131 | similar to hypothetical protein FLJ10652                                              | RGD1309621              | 3.956  | 0.015 | 4.236 | 0.000 | 6.715  | 0.005 | 2.688  | 0.001 |
| 1379278_at   | BE103919 | similar to hypothetical protein FLJ10871 (predicted)                                  | RGD1311539_predicted    | 0.998  | 0.517 | 0.799 | 0.566 | 1.145  | 0.341 | 0.996  | 0.277 |
| 1395072_at   | AW534686 | Similar to hypothetical protein FLJ10901 (predicted)                                  | RGD1311892_predicted    | 1.533  | 0.073 | 1.049 | 0.683 | 1.111  | 0.092 | 0.774  | 0.010 |
| 1377341_at   | AA859545 | similar to hypothetical protein FLJ10925                                              | RGD1305455              | 0.903  | 0.192 | 0.829 | 0.512 | 0.900  | 0.355 | 0.926  | 0.733 |
| 1380546_at   | AA926048 | similar to hypothetical protein FLJ10986 /// similar to hypothetical protein FLJ10986 | LOC298250 /// LOC298251 | 1.002  | 0.926 | 0.634 | 0.131 | 1.482  | 0.479 | 0.744  | 0.196 |
| 1381816_at   | BE119617 | similar to hypothetical protein FLJ11218                                              | RGD1309804              | 1.283  | 0.365 | 1.034 | 0.968 | 1.068  | 0.221 | 0.999  | 0.989 |
| 1382008_at   | AI044348 | similar to hypothetical protein FLJ11218                                              | RGD1309804              | 0.996  | 0.993 | 0.780 | 0.053 | 0.624  | 0.036 | 0.915  | 0.796 |
| 1385277_x_at | AA818849 | similar to hypothetical protein FLJ11354 (predicted)                                  | RGD1310093_predicted    | 6.503  | 0.002 | 1.849 | 0.004 | 16.826 | 0.004 | 5.776  | 0.025 |
| 1385276_a_at | AA818849 | similar to hypothetical protein FLJ11354 (predicted)                                  | RGD1310093_predicted    | 18.547 | 0.014 | 3.700 | 0.008 | 57.307 | 0.005 | 17.056 | 0.002 |
| 1399151_at   | AI029110 | similar to hypothetical protein FLJ11526 (predicted)                                  | RGD1309585_predicted    | 0.938  | 0.919 | 1.593 | 0.021 | 0.813  | 0.549 | 1.402  | 0.071 |
| 1373451_at   | BG380780 | similar to hypothetical protein FLJ11712                                              | MGC94780                | 0.789  | 0.197 | 0.764 | 0.288 | 0.910  | 0.541 | 1.141  | 0.538 |
| 1380815_at   | AW523684 | similar to hypothetical protein FLJ11752                                              | LOC304923               | 0.848  | 0.249 | 1.698 | 0.017 | 0.874  | 0.660 | 1.652  | 0.029 |
| 1382972_at   | BE103344 | similar to hypothetical protein FLJ12787                                              | RGD1310992              | 1.307  | 0.185 | 2.872 | 0.005 | 1.518  | 0.135 | 1.915  | 0.019 |
| 1393320_at   | BF396985 | Similar to hypothetical protein FLJ12787                                              | RGD1310992              | 1.215  | 0.378 | 2.072 | 0.006 | 1.131  | 0.869 | 2.000  | 0.000 |
| 1383849_at   | AW143311 | similar to hypothetical protein FLJ12994 (predicted)                                  | RGD1308795_predicted    | 0.630  | 0.281 | 0.764 | 0.766 | 1.010  | 0.936 | 0.919  | 0.342 |
| 1382139_at   | BE108950 | similar to hypothetical protein FLJ12994 (predicted)                                  | RGD1308795_predicted    | 0.962  | 0.825 | 0.692 | 0.028 | 0.862  | 0.096 | 0.757  | 0.022 |
| 1377683_at   | AI407061 | similar to hypothetical protein FLJ13045 (predicted)                                  | RGD1307615_predicted    | 0.804  | 0.206 | 1.011 | 0.367 | 0.597  | 0.997 | 1.162  | 0.484 |
| 1380667_at   | AW251634 | similar to hypothetical protein FLJ13045 (predicted)                                  | RGD1307615_predicted    | 1.073  | 0.250 | 0.932 | 0.768 | 0.683  | 0.728 | 0.988  | 0.954 |
| 1372618_at   | AI407147 | similar to hypothetical protein FLJ13045 (predicted)                                  | RGD1307615_predicted    | 0.860  | 0.364 | 1.275 | 0.182 | 0.871  | 0.828 | 1.054  | 0.106 |
| 1385066_a_at | BM390527 | Similar to hypothetical protein FLJ13089                                              | RGD1305685              | 1.585  | 0.032 | 2.144 | 0.004 | 1.751  | 0.010 | 2.273  | 0.002 |

|              |          |                                                                                       |                             |       |       |       |       |        |       |       |       |
|--------------|----------|---------------------------------------------------------------------------------------|-----------------------------|-------|-------|-------|-------|--------|-------|-------|-------|
| 1395524_at   | AW525958 | Similar to hypothetical protein FLJ13089                                              | RGD1305685                  | 1.239 | 0.287 | 1.195 | 0.968 | 2.146  | 0.006 | 1.168 | 0.175 |
| 1384553_at   | BE118056 | similar to hypothetical protein FLJ13089                                              | RGD1305685                  | 1.246 | 0.395 | 2.301 | 0.000 | 1.771  | 0.004 | 2.225 | 0.013 |
| 1394566_at   | AI549119 | similar to hypothetical protein FLJ13188 (predicted)                                  | RGD1305500_predicted        | 0.723 | 0.069 | 0.455 | 0.013 | 0.666  | 0.578 | 0.579 | 0.102 |
| 1377439_at   | BF408617 | similar to hypothetical protein FLJ13231 (predicted)                                  | RGD1310081_predicted        | 4.627 | 0.000 | 1.024 | 0.832 | 20.467 | 0.000 | 3.357 | 0.000 |
| 1382062_at   | AA943385 | similar to hypothetical protein FLJ13273 (predicted)                                  | RGD1311822_predicted        | 0.700 | 0.246 | 1.008 | 0.958 | 0.737  | 0.009 | 0.983 | 0.741 |
| 1373866_at   | AI238596 | similar to hypothetical protein FLJ13448                                              | RGD1359509                  | 0.662 | 0.014 | 0.821 | 0.349 | 0.721  | 0.024 | 0.925 | 0.282 |
| 1382530_at   | AI044286 | Similar to hypothetical protein FLJ13910 (predicted)                                  | RGD1309766_predicted        | 1.224 | 0.779 | 0.639 | 0.082 | 1.041  | 0.291 | 0.626 | 0.117 |
| 1383258_at   | BM383065 | similar to hypothetical protein FLJ14146                                              | RGD1310587                  | 0.703 | 0.338 | 0.667 | 0.428 | 0.963  | 0.395 | 1.187 | 0.526 |
| 1384956_at   | AI556490 | Similar to hypothetical protein FLJ14345 (predicted)                                  | RGD1566248_predicted        | 1.125 | 0.716 | 1.223 | 0.868 | 1.489  | 0.980 | 1.589 | 0.086 |
| 1390031_at   | BG378798 | similar to hypothetical protein FLJ14466                                              | RGD1311873                  | 0.761 | 0.124 | 0.966 | 0.950 | 1.106  | 0.744 | 0.817 | 0.960 |
| 1392463_at   | AI576058 | similar to hypothetical protein FLJ14503 (predicted)                                  | RGD1564852_predicted        | 1.001 | 0.542 | 0.613 | 0.010 | 1.317  | 0.093 | 0.933 | 0.322 |
| 1397373_at   | AI575906 | similar to hypothetical protein FLJ14503 (predicted)                                  | RGD1564852_predicted        | 0.792 | 0.563 | 0.807 | 0.233 | 0.953  | 0.816 | 0.586 | 0.063 |
| 1374767_at   | AI105450 | similar to hypothetical protein FLJ14675                                              | RGD1309592                  | 0.684 | 0.011 | 0.468 | 0.048 | 0.531  | 0.027 | 0.678 | 0.092 |
| 1386425_at   | H33472   | Similar to hypothetical protein FLJ14675                                              | RGD1309592                  | 0.448 | 0.108 | 0.253 | 0.058 | 0.645  | 0.271 | 0.363 | 0.032 |
| 1398020_at   | BF393027 | Similar to hypothetical protein FLJ14675                                              | RGD1309592                  | 0.618 | 0.243 | 0.090 | 0.014 | 0.363  | 0.058 | 0.094 | 0.019 |
| 1392051_at   | BE106315 | similar to hypothetical protein FLJ14681 (predicted)                                  | RGD1307907_predicted        | 0.889 | 0.451 | 0.783 | 0.067 | 0.863  | 0.378 | 0.718 | 0.050 |
| 1373018_at   | BM390695 | similar to hypothetical protein FLJ14800 (predicted)                                  | RGD1561500_predicted        | 0.917 | 0.085 | 1.052 | 0.405 | 1.134  | 0.357 | 1.000 | 0.974 |
| 1383118_at   | BI288120 | similar to hypothetical protein FLJ14803                                              | RGD1309682                  | 0.326 | 0.010 | 0.325 | 0.006 | 0.383  | 0.013 | 0.387 | 0.263 |
| 1374660_at   | BM385193 | similar to hypothetical protein FLJ20003 (predicted)                                  | RGD1309025_predicted        | 1.163 | 0.430 | 0.849 | 0.984 | 1.322  | 0.085 | 1.181 | 0.049 |
| 1376898_at   | AI172467 | Similar to hypothetical protein FLJ20035 (predicted)                                  | RGD1561680_predicted        | 1.047 | 0.643 | 0.950 | 0.776 | 0.860  | 0.365 | 0.749 | 0.607 |
| 1392680_at   | AA900508 | Similar to hypothetical protein FLJ20037 (predicted)                                  | RGD1311381_predicted        | 0.302 | 0.038 | 0.276 | 0.017 | 0.330  | 0.084 | 0.299 | 0.007 |
| 1394940_at   | BI294811 | similar to hypothetical protein FLJ20037 (predicted)                                  | RGD1311381_predicted        | 0.203 | 0.055 | 0.361 | 0.004 | 0.322  | 0.006 | 0.530 | 0.000 |
| 1394745_at   | AA850950 | Similar to hypothetical protein FLJ20037 (predicted)                                  | RGD1311381_predicted        | 0.469 | 0.056 | 0.354 | 0.067 | 0.305  | 0.039 | 0.313 | 0.066 |
| 1394695_at   | BE111700 | Similar to hypothetical protein FLJ20037 (predicted)                                  | RGD1311381_predicted        | 0.597 | 0.170 | 2.266 | 0.005 | 0.640  | 0.128 | 2.245 | 0.028 |
| 1383496_at   | BM387466 | similar to hypothetical protein FLJ20171 (predicted)                                  | RGD1560481_predicted        | 1.216 | 0.102 | 2.611 | 0.001 | 1.503  | 0.006 | 2.530 | 0.000 |
| 1382596_a_at | AI230388 | similar to hypothetical protein FLJ20254                                              | RGD1311324                  | 0.634 | 0.007 | 0.683 | 0.084 | 0.689  | 0.040 | 0.697 | 0.053 |
| 1394530_at   | AW535733 | Similar to hypothetical protein FLJ20259 (predicted)                                  | RGD1311095_predicted        | 1.720 | 0.430 | 1.440 | 0.050 | 0.800  | 0.464 | 1.455 | 0.150 |
| 1374227_at   | BM386851 | similar to hypothetical protein FLJ20272 (predicted)                                  | RGD1305264_predicted        | 0.997 | 0.816 | 1.279 | 0.155 | 0.999  | 0.709 | 1.025 | 0.714 |
| 1374719_at   | BF285339 | Similar to hypothetical protein FLJ20302; similar to CG31653-PA (predicted)           | RGD1307264_predicted        | 1.248 | 0.686 | 1.791 | 0.015 | 0.691  | 0.283 | 1.361 | 0.132 |
| 1377745_at   | BE349673 | similar to hypothetical protein FLJ20331                                              | LOC310946                   | 0.502 | 0.026 | 1.362 | 0.075 | 0.672  | 0.284 | 1.131 | 0.117 |
| 1382321_at   | AI071312 | Similar to hypothetical protein FLJ20422 (predicted)                                  | RGD1307703_predicted        | 0.409 | 0.005 | 0.519 | 0.104 | 0.600  | 0.050 | 0.708 | 0.051 |
| 1388564_at   | BF283612 | similar to hypothetical protein FLJ20436                                              | RGD1303127                  | 1.139 | 0.079 | 2.149 | 0.001 | 1.245  | 0.189 | 1.794 | 0.002 |
| 1381108_at   | BF387399 | similar to hypothetical protein FLJ20436                                              | RGD1303127                  | 0.996 | 0.974 | 1.325 | 0.613 | 1.001  | 0.994 | 1.105 | 0.997 |
| 1373492_at   | AA964545 | similar to hypothetical protein FLJ20487                                              | RGD1309216                  | 0.979 | 0.974 | 0.908 | 0.051 | 1.228  | 0.334 | 0.966 | 0.620 |
| 1388635_at   | BE113372 | similar to hypothetical protein FLJ20507 (predicted)                                  | RGD1309744_predicted        | 0.835 | 0.630 | 0.746 | 0.013 | 0.932  | 0.353 | 0.704 | 0.013 |
| 1389317_at   | BF417627 | similar to hypothetical protein FLJ20507 (predicted)                                  | RGD1309744_predicted        | 0.921 | 0.915 | 1.255 | 0.089 | 0.852  | 0.871 | 1.177 | 0.451 |
| 1384330_at   | AI763467 | similar to hypothetical protein FLJ20546                                              | LOC303067                   | 0.645 | 0.509 | 1.687 | 0.092 | 0.469  | 0.033 | 1.137 | 0.464 |
| 1391530_a_at | BI291880 | similar to hypothetical protein FLJ20604 /// similar to hypothetical protein FLJ20604 | RGD1311092 ///<br>LOC498451 | 0.738 | 0.641 | 1.451 | 0.118 | 1.309  | 0.303 | 3.143 | 0.038 |
| 1373248_at   | BI292079 | Similar to hypothetical protein FLJ20674 (predicted)                                  | RGD1565800_predicted        | 1.028 | 0.747 | 0.892 | 0.096 | 0.892  | 0.750 | 0.785 | 0.098 |
| 1392454_at   | BI296999 | similar to hypothetical protein FLJ20729 (predicted)                                  | RGD1308723_predicted        | 2.121 | 0.219 | 2.161 | 0.012 | 2.697  | 0.006 | 2.474 | 0.002 |
| 1382253_at   | BF419062 | similar to hypothetical protein FLJ21103                                              | RGD1307173                  | 1.041 | 0.809 | 0.974 | 0.808 | 1.034  | 0.384 | 0.911 | 0.936 |
| 1382117_at   | BF417345 | similar to hypothetical protein FLJ21148 (predicted)                                  | RGD1560538_predicted        | 0.411 | 0.013 | 2.307 | 0.006 | 0.196  | 0.049 | 2.658 | 0.001 |
| 1392109_at   | BG671422 | Similar to hypothetical protein FLJ21439 (predicted)                                  | RGD1562529_predicted        | 0.613 | 0.010 | 0.921 | 0.259 | 0.528  | 0.103 | 0.979 | 0.969 |
| 1376695_at   | BE108967 | similar to hypothetical protein FLJ21816 (predicted)                                  | RGD1304759_predicted        | 1.020 | 0.914 | 0.590 | 0.021 | 1.007  | 0.752 | 0.628 | 0.044 |
| 1380943_at   | BI301460 | similar to hypothetical protein FLJ21820                                              | RGD1311648                  | 0.904 | 0.508 | 0.697 | 0.013 | 1.281  | 0.266 | 0.921 | 0.606 |
| 1372670_at   | BI281686 | similar to hypothetical protein FLJ21827                                              | RGD1307682                  | 0.506 | 0.061 | 0.348 | 0.014 | 0.304  | 0.048 | 0.326 | 0.064 |
| 1395984_at   | AI043648 | similar to hypothetical protein FLJ21827                                              | RGD1307682                  | 1.038 | 0.978 | 0.450 | 0.026 | 1.000  | 0.828 | 0.454 | 0.027 |
| 1376281_at   | BM389698 | Similar to hypothetical protein FLJ22349                                              | LOC500909                   | 1.268 | 0.112 | 1.084 | 0.063 | 1.234  | 0.569 | 1.045 | 0.426 |
| 1393804_at   | BF388537 | similar to hypothetical protein FLJ22490 (predicted)                                  | RGD1307055_predicted        | 0.906 | 0.511 | 0.857 | 0.310 | 0.780  | 0.289 | 0.861 | 0.449 |
| 1379343_at   | BF404452 | similar to hypothetical protein FLJ22555                                              | MGC94335                    | 1.175 | 0.567 | 1.029 | 0.826 | 1.161  | 0.118 | 1.020 | 0.713 |
| 1367510_at   | BG381690 | similar to hypothetical protein FLJ22625                                              | RGD1304696                  | 0.435 | 0.483 | 0.465 | 0.004 | 0.473  | 0.015 | 0.424 | 0.005 |
| 1394891_at   | BF548290 | Similar to hypothetical protein FLJ22965 (predicted)                                  | RGD1564541_predicted        | 1.504 | 0.091 | 1.198 | 0.873 | 1.273  | 0.281 | 0.992 | 0.304 |
| 1380185_at   | BI303290 | Similar to hypothetical protein FLJ22965 (predicted)                                  | RGD1564541_predicted        | 0.932 | 0.727 | 0.695 | 0.033 | 1.115  | 0.823 | 0.490 | 0.019 |
| 1377854_at   | AI406343 | similar to hypothetical protein FLJ23375 (predicted)                                  | RGD1305647_predicted        | 0.918 | 0.588 | 2.536 | 0.000 | 0.709  | 0.006 | 2.248 | 0.013 |
| 1374042_at   | BG378161 | similar to hypothetical protein FLJ23451 (predicted)                                  | RGD1310453_predicted        | 0.904 | 0.141 | 1.473 | 0.033 | 1.210  | 0.699 | 1.035 | 0.433 |
| 1372338_at   | AI599079 | similar to hypothetical protein FLJ25059 (predicted)                                  | RGD1565697_predicted        | 0.610 | 0.130 | 0.594 | 0.045 | 0.657  | 0.010 | 0.724 | 0.127 |
| 1386795_at   | BF291091 | similar to hypothetical protein FLJ25530 (predicted)                                  | RGD1305697_predicted        | 0.654 | 0.007 | 0.169 | 0.000 | 0.643  | 0.326 | 0.184 | 0.046 |
| 1382235_at   | BF549700 | similar to hypothetical protein FLJ30596 (predicted)                                  | RGD1306809_predicted        | 0.813 | 0.365 | 1.998 | 0.092 | 1.442  | 0.012 | 2.348 | 0.041 |
| 1375460_at   | BE113248 | similar to hypothetical protein FLJ30656 (predicted)                                  | RGD1309441_predicted        | 0.779 | 0.088 | 1.008 | 0.045 | 0.621  | 0.026 | 0.988 | 0.549 |
| 1389627_at   | BF550270 | similar to hypothetical protein FLJ31413                                              | RGD1306209                  | 0.911 | 0.865 | 0.874 | 0.239 | 0.729  | 0.159 | 0.631 | 0.007 |

|              |          |                                                                 |                      |       |       |       |       |       |       |       |       |
|--------------|----------|-----------------------------------------------------------------|----------------------|-------|-------|-------|-------|-------|-------|-------|-------|
| 1399087_at   | AI179711 | similar to hypothetical protein FLJ31528                        | RGD1307410           | 0.651 | 0.104 | 1.011 | 0.235 | 1.096 | 0.394 | 0.544 | 0.042 |
| 1381924_at   | BF412180 | similar to hypothetical protein FLJ31606 (predicted)            | RGD1561507_predicted | 1.444 | 0.167 | 1.020 | 0.891 | 1.020 | 0.918 | 1.029 | 0.868 |
| 1391929_at   | AI231461 | Similar to hypothetical protein FLJ31846 (predicted)            | RGD1306118_predicted | 1.449 | 0.566 | 0.777 | 0.950 | 0.735 | 0.627 | 1.319 | 0.100 |
| 1383951_at   | BE108661 | similar to hypothetical protein FLJ31951 (predicted)            | RGD1309561_predicted | 0.443 | 0.009 | 0.777 | 0.131 | 0.625 | 0.050 | 0.934 | 0.716 |
| 1377178_at   | AA998606 | similar to hypothetical protein FLJ32356 (predicted)            | RGD1310656_predicted | 1.098 | 0.590 | 0.936 | 0.783 | 1.001 | 0.984 | 0.938 | 0.654 |
| 1398618_s_at | AW435170 | Similar to hypothetical protein FLJ32743 (predicted)            | RGD1306734_predicted | 1.062 | 0.781 | 1.061 | 0.285 | 1.200 | 0.160 | 1.128 | 0.245 |
| 1393818_s_at | BE102234 | similar to hypothetical protein FLJ32796 (predicted)            | RGD1311142_predicted | 0.960 | 0.999 | 0.926 | 0.075 | 1.015 | 0.888 | 0.999 | 0.929 |
| 1379636_at   | AW528443 | similar to hypothetical protein FLJ32954                        | LOC313840            | 1.080 | 0.558 | 0.886 | 0.387 | 1.004 | 0.977 | 0.554 | 0.011 |
| 1376776_at   | AW915484 | similar to hypothetical protein FLJ33084                        | LOC500528            | 0.821 | 0.303 | 0.307 | 0.047 | 0.622 | 0.054 | 0.365 | 0.013 |
| 1374076_at   | AI408984 | similar to hypothetical protein FLJ34389 (predicted)            | RGD1305243_predicted | 3.029 | 0.048 | 0.872 | 0.652 | 1.820 | 0.031 | 1.190 | 1.000 |
| 1392389_at   | BF389942 | Similar to hypothetical protein FLJ34389 (predicted)            | RGD1305243_predicted | 0.970 | 0.801 | 1.175 | 0.980 | 0.939 | 0.589 | 1.068 | 0.331 |
| 1372909_at   | BE112384 | similar to hypothetical protein FLJ36090 (predicted)            | RGD1565619_predicted | 0.480 | 0.058 | 0.784 | 0.110 | 0.678 | 0.259 | 1.060 | 0.548 |
| 1382420_at   | AI146080 | Similar to hypothetical protein FLJ37440 (predicted)            | RGD1310131_predicted | 1.577 | 0.353 | 0.523 | 0.026 | 1.888 | 0.769 | 0.566 | 0.039 |
| 1389182_at   | AI603132 | similar to hypothetical protein FLJ37953 (predicted)            | RGD1311269_predicted | 0.905 | 0.362 | 1.612 | 0.099 | 1.241 | 0.179 | 1.371 | 0.498 |
| 1384149_at   | H32531   | similar to hypothetical protein FLJ38348 (predicted)            | RGD1311424_predicted | 1.405 | 0.025 | 1.613 | 0.022 | 1.014 | 0.887 | 0.987 | 0.098 |
| 1390124_at   | AA801136 | similar to hypothetical protein FLJ38426 (predicted)            | RGD1564603_predicted | 0.896 | 0.816 | 1.741 | 0.009 | 0.705 | 0.892 | 1.143 | 0.044 |
| 1371932_at   | AI232287 | similar to hypothetical protein FLJ38482                        | RGD1309341           | 1.480 | 0.275 | 1.956 | 0.018 | 1.656 | 0.079 | 1.963 | 0.006 |
| 1393074_at   | BF406819 | Similar to hypothetical protein FLJ38984 (predicted)            | RGD1563072_predicted | 0.883 | 0.258 | 1.379 | 0.090 | 1.002 | 0.993 | 1.216 | 0.095 |
| 1380314_at   | BI290787 | similar to hypothetical protein FLJ38984 (predicted)            | RGD1563072_predicted | 0.999 | 0.956 | 0.906 | 0.597 | 0.988 | 0.884 | 0.844 | 0.387 |
| 1396200_at   | BF419037 | similar to hypothetical protein FLJ40283 (predicted)            | RGD1305898_predicted | 0.685 | 0.131 | 1.112 | 0.113 | 0.751 | 0.147 | 0.929 | 0.087 |
| 1384008_at   | AI555224 | Similar to hypothetical protein FLJ40283 (predicted)            | RGD1305898_predicted | 1.288 | 0.164 | 1.100 | 0.829 | 1.409 | 0.017 | 0.903 | 0.432 |
| 1398647_at   | BI288939 | Similar to hypothetical protein FLJ40283 (predicted)            | RGD1305898_predicted | 1.152 | 0.239 | 1.130 | 0.198 | 1.378 | 0.032 | 1.080 | 0.178 |
| 1380419_at   | BF287246 | Similar to hypothetical protein FLJ90013 (predicted)            | RGD1309656_predicted | 0.990 | 0.994 | 0.857 | 0.867 | 0.719 | 0.036 | 0.657 | 0.498 |
| 1397806_at   | BF406662 | similar to hypothetical protein FLJ90652                        | LOC293494            | 0.880 | 0.793 | 1.296 | 0.093 | 0.917 | 0.789 | 0.999 | 0.999 |
| 1396796_at   | BF392949 | Similar to hypothetical protein FLJ90709                        | RGD1311881           | 1.444 | 0.857 | 0.853 | 0.582 | 1.187 | 0.136 | 0.660 | 0.854 |
| 1390514_at   | BI295160 | similar to hypothetical protein from BCRA2 region               | MGC94223             | 1.573 | 0.006 | 1.992 | 0.001 | 1.409 | 0.002 | 1.782 | 0.008 |
| 1383179_at   | BI291413 | Similar to hypothetical protein HSPC129                         | RGD1309219           | 1.536 | 0.055 | 3.031 | 0.001 | 1.207 | 0.048 | 2.108 | 0.003 |
| 1375697_at   | AI407016 | similar to Hypothetical protein KIAA0152                        | RGD1307736           | 0.714 | 0.658 | 1.663 | 0.020 | 0.654 | 0.008 | 0.869 | 0.135 |
| 1379046_at   | BI290140 | similar to Hypothetical protein KIAA0152                        | RGD1307736           | 0.666 | 0.780 | 1.555 | 0.063 | 0.731 | 0.083 | 0.834 | 0.696 |
| 1380907_at   | BE109785 | Similar to Hypothetical protein KIAA0297/KIAA0329 (predicted)   | RGD1307503_predicted | 1.079 | 0.996 | 1.054 | 0.378 | 1.093 | 0.091 | 0.874 | 0.682 |
| 1383883_at   | BG380058 | Similar to Hypothetical protein KIAA0469 (predicted)            | RGD1309644_predicted | 0.995 | 0.989 | 0.949 | 0.390 | 1.019 | 0.182 | 0.957 | 0.292 |
| 1384153_at   | BF415575 | similar to Hypothetical protein KIAA0555 (predicted)            | RGD1559742_predicted | 1.334 | 0.373 | 1.263 | 0.741 | 1.208 | 0.287 | 1.612 | 0.217 |
| 1393089_at   | BI295973 | similar to Hypothetical protein KIAA0586 (predicted)            | RGD1311562_predicted | 0.836 | 0.451 | 1.001 | 0.828 | 1.008 | 0.686 | 0.972 | 0.883 |
| 1384886_at   | AW523423 | similar to hypothetical protein LOC168850 (predicted)           | RGD1560157_predicted | 1.066 | 0.530 | 0.825 | 0.048 | 0.943 | 0.353 | 0.927 | 0.472 |
| 1383624_at   | BF420279 | similar to hypothetical protein LOC284018 isoform b (predicted) | RGD1565033_predicted | 0.654 | 0.040 | 0.505 | 0.032 | 0.376 | 0.023 | 0.500 | 0.140 |
| 1390226_at   | AI408343 | similar to hypothetical protein LOC340061 (predicted)           | RGD1562552_predicted | 3.047 | 0.012 | 5.430 | 0.001 | 3.553 | 0.009 | 3.264 | 0.002 |
| 1374211_at   | BG380798 | similar to Hypothetical protein LOC73072 (predicted)            | RGD1566084_predicted | 0.272 | 0.098 | 0.679 | 0.024 | 0.344 | 0.109 | 0.661 | 0.142 |
| 1382471_at   | AI709698 | similar to hypothetical protein MGC10993                        | RGD1310320           | 0.412 | 0.021 | 0.912 | 0.105 | 0.176 | 0.006 | 1.693 | 0.097 |
| 1372971_at   | BI291301 | similar to Hypothetical protein MGC11690                        | RGD1305178           | 0.685 | 0.152 | 1.362 | 0.274 | 0.587 | 0.001 | 0.918 | 0.557 |
| 1379977_at   | AI176858 | similar to hypothetical protein MGC13024                        | RGD1306538           | 0.418 | 0.032 | 0.562 | 0.073 | 0.535 | 0.070 | 0.449 | 0.010 |
| 1374258_at   | BF394021 | Similar to hypothetical protein MGC13138 (predicted)            | RGD1306928_predicted | 0.978 | 0.818 | 0.925 | 0.358 | 0.979 | 0.825 | 0.979 | 0.443 |
| 1388683_at   | AI411174 | similar to hypothetical protein MGC14151 (predicted)            | RGD1559617_predicted | 0.599 | 0.067 | 0.984 | 0.121 | 0.684 | 0.038 | 1.017 | 0.200 |
| 1395351_at   | BF543381 | Similar to hypothetical protein MGC14151 (predicted)            | RGD1559617_predicted | 0.699 | 0.110 | 0.442 | 0.047 | 0.541 | 0.053 | 0.373 | 0.109 |
| 1379323_at   | BE109498 | similar to hypothetical protein MGC14327 (predicted)            | RGD1306304_predicted | 0.208 | 0.045 | 0.427 | 0.016 | 0.205 | 0.011 | 0.442 | 0.121 |
| 1389124_at   | AI009814 | similar to hypothetical protein MGC15396 (predicted)            | RGD1310602_predicted | 0.873 | 0.528 | 0.412 | 0.004 | 0.663 | 0.243 | 0.532 | 0.017 |
| 1373806_at   | AI044859 | similar to hypothetical protein MGC15407                        | RGD1311732           | 0.438 | 0.068 | 0.288 | 0.000 | 0.421 | 0.002 | 0.286 | 0.001 |
| 1394424_at   | AI547622 | similar to hypothetical protein MGC15407                        | RGD1311732           | 0.539 | 0.334 | 0.216 | 0.003 | 0.423 | 0.075 | 0.286 | 0.007 |
| 1399102_at   | BG377901 | similar to hypothetical protein MGC15523                        | RGD1306356           | 0.328 | 0.063 | 0.457 | 0.004 | 0.378 | 0.024 | 0.462 | 0.002 |
| 1373853_at   | AI705797 | similar to hypothetical protein MGC15716                        | RGD1308123           | 0.622 | 0.108 | 0.338 | 0.000 | 0.410 | 0.025 | 0.406 | 0.022 |
| 1388789_at   | AI410352 | similar to hypothetical protein MGC17943 (predicted)            | RGD1563325_predicted | 0.584 | 0.596 | 0.797 | 0.022 | 0.739 | 0.346 | 0.650 | 0.031 |
| 1392942_at   | BM383823 | similar to hypothetical protein MGC17943 (predicted)            | RGD1563325_predicted | 1.223 | 0.926 | 0.450 | 0.307 | 0.697 | 0.097 | 0.437 | 0.311 |
| 1372866_at   | BM386202 | similar to hypothetical protein MGC18873                        | RGD1311914           | 0.730 | 0.142 | 2.890 | 0.000 | 0.919 | 0.195 | 1.874 | 0.000 |
| 1372496_at   | BG371538 | similar to hypothetical protein MGC19604 (predicted)            | RGD1561264_predicted | 0.551 | 0.665 | 3.260 | 0.001 | 0.682 | 0.086 | 1.852 | 0.003 |
| 1373730_at   | BI282077 | Similar to hypothetical protein MGC20460 (predicted)            | RGD1310651_predicted | 1.756 | 0.302 | 4.172 | 0.001 | 1.047 | 0.733 | 3.782 | 0.001 |
| 1377793_at   | BF407551 | similar to hypothetical protein MGC20460 (predicted)            | RGD1310651_predicted | 1.087 | 0.718 | 0.910 | 0.815 | 1.492 | 0.824 | 0.881 | 0.267 |
| 1383198_at   | AI598511 | similar to hypothetical protein MGC20460 (predicted)            | RGD1310651_predicted | 0.926 | 0.902 | 1.084 | 0.746 | 0.500 | 0.278 | 0.688 | 0.635 |
| 1374899_at   | BM383043 | similar to hypothetical protein MGC20579 (predicted)            | RGD1566042_predicted | 0.448 | 0.514 | 0.212 | 0.084 | 0.562 | 0.390 | 0.186 | 0.094 |
| 1374670_at   | BM384543 | similar to hypothetical protein MGC20700 (predicted)            | RGD1307722_predicted | 3.432 | 0.002 | 2.520 | 0.008 | 9.022 | 0.003 | 2.794 | 0.005 |
| 1372807_at   | BF402462 | similar to hypothetical protein MGC21688 (predicted)            | RGD1310480_predicted | 0.980 | 0.342 | 0.498 | 0.061 | 1.932 | 0.071 | 0.690 | 0.028 |
| 1372786_at   | BF284299 | similar to hypothetical protein MGC2494                         | RGD1306126           | 0.950 | 0.219 | 0.419 | 0.040 | 0.981 | 0.213 | 0.589 | 0.026 |
| 1390620_at   | BI278605 | similar to Hypothetical protein MGC25529 (predicted)            | RGD1306746_predicted | 0.759 | 0.094 | 0.705 | 0.042 | 0.720 | 0.130 | 1.191 | 0.544 |

|              |          |                                                                                                                                     |                      |        |       |        |       |         |       |         |       |
|--------------|----------|-------------------------------------------------------------------------------------------------------------------------------------|----------------------|--------|-------|--------|-------|---------|-------|---------|-------|
| 1397255_at   | AW533685 | similar to hypothetical protein MGC2574                                                                                             | MGC94720             | 0.641  | 0.294 | 2.275  | 0.278 | 0.373   | 0.089 | 1.849   | 0.088 |
| 1378958_at   | AA998314 | similar to hypothetical protein MGC2574                                                                                             | MGC94720             | 0.680  | 0.352 | 1.557  | 0.023 | 0.508   | 0.021 | 1.848   | 0.001 |
| 1375551_at   | BG377782 | similar to hypothetical protein MGC2574                                                                                             | MGC94720             | 0.551  | 0.895 | 1.632  | 0.221 | 0.465   | 0.027 | 1.751   | 0.028 |
| 1389637_at   | AI227731 | Similar to hypothetical protein MGC26816 (predicted)                                                                                | RGD1309338_predicted | 0.863  | 0.410 | 1.022  | 0.761 | 0.869   | 0.460 | 0.986   | 0.924 |
| 1373135_at   | AW531123 | similar to hypothetical protein MGC2744                                                                                             | LOC619440            | 0.631  | 0.942 | 0.718  | 0.873 | 0.929   | 0.880 | 0.803   | 0.629 |
| 1382388_at   | AW533941 | Similar to hypothetical protein MGC27699 (predicted)                                                                                | RGD1305013_predicted | 0.972  | 0.847 | 0.690  | 0.015 | 1.001   | 0.990 | 0.728   | 0.008 |
| 1380872_at   | BF396681 | Similar to hypothetical protein MGC2817 (predicted)                                                                                 | RGD1562449_predicted | 0.907  | 0.133 | 0.194  | 0.019 | 0.654   | 0.018 | 0.337   | 0.014 |
| 1371550_at   | AW533431 | Similar to Hypothetical protein MGC28888                                                                                            | LOC304361            | 1.693  | 0.021 | 1.314  | 0.182 | 2.317   | 0.005 | 1.505   | 0.599 |
| 1377159_at   | BE120729 | Similar to Hypothetical protein MGC28888                                                                                            | LOC304361            | 1.656  | 0.611 | 0.969  | 0.532 | 1.876   | 0.429 | 1.159   | 0.315 |
| 1372198_at   | BG376471 | similar to Hypothetical protein MGC28888                                                                                            | LOC304361            | 0.962  | 0.820 | 0.636  | 0.047 | 0.634   | 0.810 | 0.672   | 0.051 |
| 1372034_at   | BF284106 | Similar to hypothetical protein MGC29390 (predicted)                                                                                | RGD1310490_predicted | 23.406 | 0.000 | 11.803 | 0.002 | 52.253  | 0.001 | 26.183  | 0.003 |
| 1379613_at   | BM390301 | Similar to hypothetical protein MGC29390 (predicted)                                                                                | RGD1310490_predicted | 22.986 | 0.000 | 5.223  | 0.003 | 49.883  | 0.000 | 13.019  | 0.000 |
| 1390035_at   | BI297073 | similar to hypothetical protein MGC29875; novel putative protein similar to YIL091C yeast hypothetical 84 kD protein from SGA1-KTR7 | LOC305076            | 0.982  | 0.735 | 0.980  | 0.929 | 0.914   | 0.012 | 1.044   | 0.577 |
| 1373209_at   | AI599284 | Similar to hypothetical protein MGC30618                                                                                            | RGD1305572           | 1.218  | 0.348 | 1.128  | 0.586 | 1.161   | 0.488 | 1.234   | 0.782 |
| 1372980_at   | AA819250 | similar to Hypothetical protein MGC30714 (predicted)                                                                                | RGD1560915_predicted | 0.594  | 0.011 | 0.539  | 0.010 | 0.472   | 0.005 | 0.604   | 0.126 |
| 1389559_at   | AA892872 | similar to Hypothetical protein MGC31278 (predicted)                                                                                | RGD1564420_predicted | 1.151  | 0.270 | 2.005  | 0.000 | 0.887   | 0.619 | 1.738   | 0.000 |
| 1390101_at   | AI170609 | similar to hypothetical protein MGC31967 (predicted)                                                                                | RGD1560252_predicted | 0.510  | 0.004 | 0.329  | 0.004 | 0.452   | 0.001 | 0.394   | 0.101 |
| 1379826_at   | AA859429 | similar to hypothetical protein MGC31967 (predicted)                                                                                | RGD1560252_predicted | 0.448  | 0.064 | 0.161  | 0.008 | 0.420   | 0.007 | 0.283   | 0.009 |
| 1376134_at   | BI277596 | similar to hypothetical protein MGC3207                                                                                             | RGD1307789           | 0.729  | 0.427 | 0.552  | 0.147 | 0.668   | 0.115 | 0.655   | 0.253 |
| 1392488_at   | AI168950 | Similar to hypothetical protein MGC32132 (predicted)                                                                                | RGD1307915_predicted | 0.904  | 0.653 | 1.016  | 0.841 | 1.338   | 0.254 | 1.015   | 0.774 |
| 1397251_at   | BF389812 | Similar to hypothetical protein MGC32132 (predicted)                                                                                | RGD1307915_predicted | 1.296  | 0.834 | 1.015  | 0.083 | 0.755   | 0.453 | 0.938   | 0.946 |
| 1378338_at   | BE103735 | similar to hypothetical protein MGC32132 (predicted)                                                                                | RGD1307915_predicted | 0.991  | 0.900 | 2.728  | 0.061 | 0.968   | 0.534 | 1.463   | 0.148 |
| 1374605_at   | AA818020 | similar to hypothetical protein MGC33214 (predicted)                                                                                | RGD1309660_predicted | 0.971  | 0.541 | 1.277  | 0.088 | 1.008   | 0.967 | 1.516   | 0.019 |
| 1375513_at   | BG376846 | Similar to hypothetical protein MGC33214 (predicted)                                                                                | RGD1309660_predicted | 0.919  | 0.782 | 1.045  | 0.347 | 0.976   | 0.925 | 1.351   | 0.353 |
| 1376904_at   | AI716115 | similar to hypothetical protein MGC33486 (predicted)                                                                                | RGD1310680_predicted | 19.250 | 0.011 | 2.353  | 0.025 | 14.190  | 0.005 | 5.376   | 0.004 |
| 1390801_at   | AI412174 | similar to hypothetical protein MGC34760                                                                                            | RGD1359349           | 1.487  | 0.057 | 0.919  | 0.780 | 2.474   | 0.018 | 1.328   | 0.254 |
| 1370901_at   | AI407120 | similar to hypothetical protein MGC36831 (predicted)                                                                                | RGD1306215_predicted | 0.490  | 0.051 | 1.098  | 0.475 | 0.373   | 0.002 | 0.744   | 0.182 |
| 1378606_at   | AI010216 | similar to hypothetical protein MGC37079 (predicted)                                                                                | RGD1310484_predicted | 0.874  | 0.170 | 0.618  | 0.002 | 0.824   | 0.043 | 0.642   | 0.007 |
| 1392993_at   | BG665293 | similar to hypothetical protein MGC37079 (predicted)                                                                                | RGD1310484_predicted | 1.186  | 0.213 | 0.741  | 0.006 | 1.092   | 0.405 | 0.669   | 0.001 |
| 1374249_at   | AI168962 | similar to Hypothetical protein MGC38513                                                                                            | RGD1304580           | 0.564  | 0.054 | 0.643  | 0.037 | 0.811   | 0.075 | 0.557   | 0.069 |
| 1373251_at   | BI289957 | similar to hypothetical protein MGC38837                                                                                            | LOC499671            | 0.595  | 0.038 | 0.745  | 0.230 | 0.696   | 0.166 | 0.826   | 0.787 |
| 1393352_at   | BI293882 | similar to hypothetical protein MGC38960 (predicted)                                                                                | RGD1310552_predicted | 0.641  | 0.015 | 0.619  | 0.012 | 0.573   | 0.045 | 0.548   | 0.010 |
| 1374574_at   | AI547611 | Similar to hypothetical protein MGC38960 (predicted)                                                                                | RGD1310552_predicted | 0.587  | 0.024 | 0.234  | 0.006 | 0.858   | 0.545 | 0.456   | 0.028 |
| 1398425_at   | AI101458 | similar to hypothetical protein MGC39325-like protein                                                                               | MGC109194            | 0.456  | 0.548 | 0.826  | 0.127 | 0.750   | 0.067 | 0.805   | 0.206 |
| 1373574_at   | BI285607 | similar to hypothetical protein MGC40499 (predicted)                                                                                | RGD1307636_predicted | 1.075  | 0.968 | 0.760  | 0.037 | 1.147   | 0.904 | 0.331   | 0.092 |
| 1392014_at   | BF416257 | Similar to hypothetical protein MGC40841; similar to hypothetical protein MGC4707                                                   | RGD1309540           | 1.569  | 0.405 | 0.902  | 0.907 | 1.279   | 0.843 | 0.957   | 0.696 |
| 1382770_at   | BG376622 | similar to hypothetical protein MGC52110 (predicted)                                                                                | RGD1565095_predicted | 0.734  | 0.491 | 1.132  | 0.460 | 0.575   | 0.086 | 1.067   | 0.657 |
| 1393512_at   | AA957880 | Similar to hypothetical protein MGC5297                                                                                             | RGD1309729           | 2.046  | 0.077 | 1.280  | 0.034 | 1.020   | 0.897 | 1.237   | 0.236 |
| 1384011_a_at | BF287623 | similar to hypothetical protein MGC5297                                                                                             | RGD1309729           | 1.151  | 0.712 | 0.982  | 0.918 | 2.169   | 0.012 | 1.299   | 0.568 |
| 1381057_at   | AW526130 | Similar to hypothetical protein MGC5391 (predicted)                                                                                 | RGD1561764_predicted | 0.469  | 0.028 | 0.954  | 0.751 | 0.674   | 0.063 | 0.830   | 0.288 |
| 1389114_at   | AW523874 | similar to Hypothetical protein MGC59076                                                                                            | RGD1309144           | 0.997  | 0.988 | 0.575  | 0.012 | 0.999   | 0.416 | 0.726   | 0.064 |
| 1373299_at   | BI295816 | similar to hypothetical protein MGC6696                                                                                             | RGD1309471           | 1.484  | 0.168 | 1.903  | 0.016 | 1.634   | 0.000 | 2.148   | 0.010 |
| 1388499_at   | AW531384 | similar to hypothetical protein MGC7537                                                                                             | RGD1359380           | 0.748  | 0.104 | 1.034  | 0.692 | 0.903   | 0.552 | 0.971   | 0.732 |
| 1392538_at   | BE110656 | similar to Hypothetical protein MGC75937 (predicted)                                                                                | RGD1562826_predicted | 0.948  | 0.077 | 1.810  | 0.031 | 1.171   | 0.184 | 1.211   | 0.262 |
| 1373388_at   | BI279290 | Similar to Hypothetical protein MGC75937 (predicted)                                                                                | RGD1562826_predicted | 1.232  | 0.086 | 1.001  | 0.078 | 1.231   | 0.234 | 0.954   | 0.781 |
| 1378201_at   | BF392915 | Similar to Hypothetical protein MGC75937 (predicted)                                                                                | RGD1562826_predicted | 0.987  | 0.865 | 1.001  | 0.968 | 0.997   | 0.975 | 0.997   | 0.934 |
| 1390653_at   | AI171174 | similar to hypothetical protein MGC9907                                                                                             | RGD1307393           | 0.954  | 0.373 | 1.365  | 0.181 | 1.330   | 0.129 | 1.527   | 0.092 |
| 1376581_at   | AW433895 | similar to hypothetical protein MGC9912 (predicted)                                                                                 | RGD1309138_predicted | 0.470  | 0.031 | 0.544  | 0.019 | 0.651   | 0.074 | 1.274   | 0.222 |
| 1372329_at   | BM389011 | similar to hypothetical protein PRO0971                                                                                             | RGD1311435           | 2.483  | 0.007 | 2.419  | 0.017 | 2.382   | 0.004 | 1.750   | 0.027 |
| 1382682_at   | AI172217 | Similar to hypothetical protein PRO0971                                                                                             | RGD1311435           | 2.429  | 0.090 | 1.779  | 0.125 | 3.959   | 0.099 | 1.356   | 0.092 |
| 1376209_at   | BG669208 | similar to hypothetical protein supported by AL449243 (predicted)                                                                   | RGD1311310_predicted | 0.884  | 0.628 | 1.125  | 0.921 | 0.731   | 0.077 | 1.094   | 0.521 |
| 1367523_at   | AI409145 | similar to hypothetical protein, 2-6 (predicted)                                                                                    | RGD1304906_predicted | 0.883  | 0.575 | 2.268  | 0.023 | 0.443   | 0.015 | 1.968   | 0.000 |
| 1389343_at   | H35203   | similar to Hypothetical UPF0327 protein (predicted)                                                                                 | RGD1560187_predicted | 0.667  | 0.504 | 1.017  | 0.259 | 0.747   | 0.073 | 0.966   | 1.000 |
| 1383579_at   | BE109121 | Similar to IKEN cDNA 6720480D16                                                                                                     | LOC502282            | 1.154  | 0.244 | 0.828  | 0.595 | 1.005   | 0.977 | 1.060   | 0.402 |
| 1375285_at   | AI407169 | Similar to IL-17D (predicted)                                                                                                       | RGD1563436_predicted | 1.001  | 0.995 | 1.047  | 0.510 | 1.000   | 0.945 | 1.156   | 0.366 |
| 1371284_at   | AJ391310 | similar to immunoglobulin 4G6 heavy chain variable region (predicted)                                                               | RGD1564284_predicted | 1.007  | 0.988 | 0.998  | 0.972 | 1.000   | 0.995 | 1.023   | 0.596 |
| 1393366_at   | BF521857 | Similar to Inner nuclear membrane protein ManI (LEM domain containing protein 3) (predicted)                                        | RGD1561001_predicted | 0.783  | 0.103 | 0.549  | 0.074 | 0.721   | 0.127 | 0.651   | 0.264 |
| 1398599_at   | BG664929 | similar to integral membrane protein 1 (predicted)                                                                                  | RGD1565793_predicted | 0.977  | 0.108 | 0.960  | 0.806 | 0.924   | 0.199 | 1.021   | 0.983 |
| 1377950_at   | AA955213 | similar to interferon-inducible GTPase                                                                                              | RGD1309362           | 63.412 | 0.001 | 29.135 | 0.009 | 235.043 | 0.001 | 142.184 | 0.006 |
| 1392637_at   | AA923988 | Similar to interferon-inducible GTPase                                                                                              | MGC108823            | 33.348 | 0.018 | 13.693 | 0.013 | 78.149  | 0.006 | 38.101  | 0.001 |



|              |          |                                                                                                                                                                     |                                                  |         |       |         |       |         |       |         |       |
|--------------|----------|---------------------------------------------------------------------------------------------------------------------------------------------------------------------|--------------------------------------------------|---------|-------|---------|-------|---------|-------|---------|-------|
| 1373992_at   | AI408440 | similar to interferon-inducible GTPase /// similar to MGC108823 protein (predicted) /// similar to MGC108823 protein                                                | MGC108823 ///<br>RGD1559715_predicted ///        | 140.487 | 0.000 | 144.379 | 0.000 | 482.198 | 0.000 | 370.848 | 0.001 |
| 1371582_at   | BM389129 | similar to interleukin enhancer binding factor 2                                                                                                                    | LOC498872                                        | 0.972   | 0.782 | 1.284   | 0.018 | 0.827   | 0.007 | 1.071   | 0.032 |
| 1382551_at   | BF417645 | similar to Intersectin 2 (SH3 domain-containing protein 1B) (SH3P18) (SH3P18-like WASP associated protein)                                                          | LOC313934                                        | 1.362   | 0.034 | 1.678   | 0.033 | 1.247   | 0.431 | 1.302   | 0.245 |
| 1377903_at   | AI408914 | Similar to Intersectin 2 (SH3 domain-containing protein 1B) (SH3P18) (SH3P18-like WASP associated protein)                                                          | LOC313934                                        | 0.842   | 0.097 | 0.642   | 0.049 | 0.692   | 0.091 | 0.919   | 0.447 |
| 1396256_at   | AI045614 | similar to Intersectin 2 (SH3 domain-containing protein 1B) (SH3P18) (SH3P18-like WASP associated protein)                                                          | LOC313934                                        | 1.144   | 0.458 | 1.009   | 0.427 | 0.665   | 0.277 | 0.759   | 0.317 |
| 1379459_at   | BI301276 | similar to intracellular membrane-associated calcium-independent phospholipase A2 gamma (predicted)                                                                 | RGD1311444_predicted                             | 1.121   | 0.344 | 0.563   | 0.835 | 1.000   | 0.996 | 0.512   | 0.140 |
| 1395725_at   | BF557088 | similar to intracellular membrane-associated calcium-independent phospholipase A2 gamma (predicted)                                                                 | RGD1311444_predicted                             | 0.975   | 0.447 | 0.964   | 0.075 | 1.091   | 0.908 | 0.889   | 0.020 |
| 1394234_x_at | AA848540 | Similar to IQ motif and WD repeats 1 (predicted)                                                                                                                    | RGD1561961_predicted                             | 0.490   | 0.016 | 0.450   | 0.023 | 0.641   | 0.167 | 0.411   | 0.036 |
| 1377807_a_at | BF389856 | Similar to IQ motif and WD repeats 1 (predicted)                                                                                                                    | RGD1561961_predicted                             | 0.688   | 0.046 | 0.652   | 0.189 | 0.621   | 0.319 | 0.474   | 0.093 |
| 1390852_x_at | BF389856 | Similar to IQ motif and WD repeats 1 (predicted)                                                                                                                    | RGD1561961_predicted                             | 0.613   | 0.061 | 0.481   | 0.123 | 0.682   | 0.228 | 0.358   | 0.079 |
| 1386473_at   | AA848540 | similar to IQ motif and WD repeats 1 (predicted)                                                                                                                    | RGD1561961_predicted                             | 0.750   | 0.163 | 0.516   | 0.004 | 0.495   | 0.136 | 0.529   | 0.047 |
| 1377808_at   | BF389856 | Similar to IQ motif and WD repeats 1 (predicted)                                                                                                                    | RGD1561961_predicted                             | 0.573   | 0.185 | 0.496   | 0.076 | 0.737   | 0.316 | 0.331   | 0.080 |
| 1395232_at   | AI011035 | similar to IQ motif and WD repeats 1 (predicted)                                                                                                                    | RGD1561961_predicted                             | 0.760   | 0.283 | 0.336   | 0.077 | 0.852   | 0.601 | 0.309   | 0.070 |
| 1384402_a_at | H31119   | similar to IQ motif and WD repeats 1 (predicted)                                                                                                                    | RGD1561961_predicted                             | 0.711   | 0.514 | 0.245   | 0.099 | 1.079   | 0.770 | 0.167   | 0.035 |
| 1385546_at   | AA998195 | similar to IQ motif and WD repeats 1 (predicted)                                                                                                                    | RGD1561961_predicted                             | 0.843   | 0.752 | 0.861   | 0.671 | 0.651   | 0.277 | 0.688   | 0.055 |
| 1383312_at   | BF396751 | Similar to JM11 protein (predicted)                                                                                                                                 | RGD1561596_predicted                             | 1.292   | 0.011 | 0.991   | 0.946 | 1.281   | 0.193 | 0.968   | 0.531 |
| 1382051_at   | AA955489 | similar to J-type co-chaperone HSC20 (predicted)                                                                                                                    | RGD1311005_predicted                             | 0.993   | 0.500 | 1.005   | 0.743 | 0.923   | 0.235 | 1.158   | 0.186 |
| 1393199_at   | AA955145 | similar to Jumonji/ARID domain-containing protein 1C (SmcX protein) (predicted) /// similar to Jumonji/ARID domain-containing protein 1C (SmcX protein) (predicted) | RGD1560601_predicted ///<br>RGD1566193_predicted | 0.956   | 0.812 | 2.335   | 0.052 | 0.888   | 0.912 | 1.004   | 0.686 |
| 1377818_at   | AW532426 | Similar to junction-mediating and regulatory protein (predicted)                                                                                                    | RGD1563506_predicted                             | 1.484   | 0.311 | 1.319   | 0.424 | 1.563   | 0.141 | 1.340   | 0.174 |
| 1375887_at   | BI282089 | similar to kaiso protein (predicted)                                                                                                                                | RGD1566309_predicted                             | 0.920   | 0.725 | 0.650   | 0.089 | 0.966   | 0.690 | 0.829   | 0.240 |
| 1373968_at   | AI176016 | Similar to KB07 protein (predicted)                                                                                                                                 | RGD1561940_predicted                             | 1.011   | 0.880 | 1.301   | 0.065 | 0.757   | 0.012 | 1.052   | 0.193 |
| 1384788_at   | BF393298 | similar to KCCR13L (predicted)                                                                                                                                      | RGD1310193_predicted                             | 0.494   | 0.013 | 0.786   | 0.045 | 0.480   | 0.005 | 0.695   | 0.082 |
| 1396556_at   | BF413366 | Similar to KCNMA1 protein                                                                                                                                           | LOC498438                                        | 1.201   | 0.939 | 1.678   | 0.020 | 1.003   | 0.946 | 1.507   | 0.066 |
| 1376730_at   | BE103377 | Similar to kelch/ankyrin repeat containing cyclin A1 interacting protein isoform a (predicted)                                                                      | RGD1561025_predicted                             | 0.761   | 0.022 | 0.664   | 0.065 | 0.709   | 0.092 | 0.652   | 0.051 |
| 1392340_at   | BF416150 | similar to Kelch-like protein 3 (predicted)                                                                                                                         | RGD1565218_predicted                             | 0.707   | 0.964 | 0.880   | 0.741 | 0.845   | 0.659 | 0.861   | 0.680 |
| 1399124_at   | AI598517 | similar to KIAA0090 protein (predicted)                                                                                                                             | RGD1310427_predicted                             | 0.690   | 0.102 | 0.531   | 0.003 | 0.759   | 0.197 | 0.456   | 0.010 |
| 1382364_at   | BI293914 | similar to KIAA0090 protein (predicted)                                                                                                                             | RGD1310427_predicted                             | 1.106   | 0.619 | 0.460   | 0.008 | 0.970   | 0.709 | 0.385   | 0.012 |
| 1389717_at   | AI171467 | similar to KIAA0157 gene product is novel. (predicted)                                                                                                              | RGD1308918_predicted                             | 0.673   | 0.559 | 0.772   | 0.166 | 0.934   | 0.457 | 0.870   | 0.729 |
| 1398607_at   | AI717510 | Similar to KIAA0240 (predicted)                                                                                                                                     | RGD1305680_predicted                             | 0.782   | 0.356 | 0.827   | 0.240 | 0.479   | 0.166 | 0.591   | 0.004 |
| 1394405_at   | AI232356 | Similar to KIAA0303 (predicted)                                                                                                                                     | RGD1310139_predicted                             | 2.515   | 0.005 | 1.508   | 0.028 | 1.788   | 0.017 | 1.253   | 0.065 |
| 1379114_at   | BF412325 | Similar to KIAA0303 (predicted)                                                                                                                                     | RGD1310139_predicted                             | 3.578   | 0.013 | 1.053   | 0.591 | 3.382   | 0.104 | 0.423   | 0.131 |
| 1384940_at   | AI136655 | similar to KIAA0335                                                                                                                                                 | RGD1305314                                       | 0.745   | 0.476 | 0.817   | 0.043 | 0.795   | 0.945 | 0.882   | 0.349 |
| 1373292_at   | AI176553 | similar to KIAA0339 protein                                                                                                                                         | RGD1311624                                       | 0.996   | 0.852 | 1.221   | 0.089 | 0.869   | 0.239 | 1.132   | 0.184 |
| 1393683_at   | BF415479 | similar to KIAA0368 (predicted)                                                                                                                                     | RGD1306148_predicted                             | 1.425   | 0.001 | 1.121   | 0.635 | 1.569   | 0.003 | 0.999   | 0.997 |
| 1389277_at   | BI285258 | similar to KIAA0368 (predicted)                                                                                                                                     | RGD1306148_predicted                             | 1.038   | 0.266 | 1.578   | 0.084 | 1.419   | 0.598 | 1.243   | 0.088 |
| 1395875_at   | BG379050 | similar to KIAA0372 gene product (predicted)                                                                                                                        | RGD1306062_predicted                             | 0.743   | 0.587 | 1.125   | 0.404 | 0.841   | 0.101 | 0.934   | 0.137 |
| 1390876_at   | BM386308 | similar to KIAA0377-like protein (predicted)                                                                                                                        | RGD1311552_predicted                             | 1.713   | 0.036 | 1.702   | 0.430 | 1.232   | 0.410 | 1.304   | 0.326 |
| 1393065_at   | BI276770 | similar to KIAA0406-like protein (predicted)                                                                                                                        | RGD1562582_predicted                             | 0.670   | 0.131 | 0.365   | 0.000 | 0.527   | 0.056 | 0.467   | 0.011 |
| 1384172_at   | BF398262 | Similar to KIAA0423 (predicted)                                                                                                                                     | RGD1310474_predicted                             | 0.974   | 0.643 | 0.870   | 0.377 | 1.235   | 0.080 | 1.163   | 0.078 |
| 1386217_at   | AI639048 | similar to KIAA0423 (predicted)                                                                                                                                     | RGD1310474_predicted                             | 1.043   | 0.715 | 1.000   | 0.997 | 1.039   | 0.423 | 0.972   | 0.724 |
| 1378831_at   | BE108135 | Similar to KIAA0456 protein (predicted)                                                                                                                             | RGD1566016_predicted                             | 1.540   | 0.048 | 1.220   | 0.833 | 0.950   | 0.397 | 1.033   | 0.719 |
| 1381126_at   | BE099652 | similar to KIAA0456 protein (predicted)                                                                                                                             | RGD1566016_predicted                             | 0.953   | 0.752 | 2.453   | 0.001 | 0.956   | 0.758 | 1.531   | 0.018 |
| 1398224_at   | BF393183 | Similar to KIAA0456 protein (predicted)                                                                                                                             | RGD1566016_predicted                             | 0.999   | 0.976 | 1.007   | 0.296 | 1.498   | 0.051 | 1.009   | 0.980 |
| 1395958_at   | BF396619 | similar to KIAA0460 protein (predicted)                                                                                                                             | RGD1308268_predicted                             | 0.810   | 0.600 | 1.105   | 0.291 | 0.546   | 0.013 | 1.124   | 0.785 |
| 1384384_at   | BF543289 | similar to KIAA0528 protein (predicted)                                                                                                                             | RGD1304592_predicted                             | 0.771   | 0.067 | 1.415   | 0.096 | 0.734   | 0.301 | 1.617   | 0.113 |
| 1390338_at   | BG373138 | similar to KIAA0556 protein                                                                                                                                         | LOC361646                                        | 0.976   | 0.929 | 1.154   | 0.214 | 1.018   | 0.642 | 1.258   | 0.046 |
| 1383933_at   | AI136714 | Similar to KIAA0564 protein (predicted)                                                                                                                             | RGD1308772_predicted                             | 0.642   | 0.020 | 0.497   | 0.000 | 0.534   | 0.019 | 0.587   | 0.015 |
| 1380431_at   | AA893000 | similar to KIAA0564 protein (predicted)                                                                                                                             | RGD1308772_predicted                             | 0.731   | 0.164 | 0.308   | 0.114 | 0.642   | 0.097 | 0.655   | 0.407 |
| 1393230_s_at | AI136714 | Similar to KIAA0564 protein (predicted)                                                                                                                             | RGD1308772_predicted                             | 0.804   | 0.251 | 0.710   | 0.071 | 0.699   | 0.087 | 0.754   | 0.100 |
| 1372395_at   | AA850978 | Similar to KIAA0597 protein (predicted)                                                                                                                             | RGD1565757_predicted                             | 0.442   | 0.035 | 0.816   | 0.034 | 0.350   | 0.003 | 0.717   | 0.053 |
| 1381715_at   | BE107590 | Similar to KIAA0605 gene product (predicted)                                                                                                                        | RGD1305459_predicted                             | 1.233   | 0.233 | 1.074   | 0.978 | 1.202   | 0.505 | 0.999   | 0.730 |
| 1398691_at   | AI408578 | Similar to KIAA0669 gene product                                                                                                                                    | LOC499624                                        | 1.900   | 0.977 | 1.556   | 0.018 | 0.926   | 0.104 | 1.658   | 0.045 |
| 1373581_at   | BG380767 | Similar to KIAA0672 gene product                                                                                                                                    | RGD1305664                                       | 1.779   | 0.135 | 1.704   | 0.027 | 2.466   | 0.077 | 2.364   | 0.001 |
| 1383677_at   | AA925701 | Similar to KIAA0794 protein (predicted)                                                                                                                             | RGD1306346_predicted                             | 0.745   | 0.441 | 0.825   | 0.081 | 0.632   | 0.175 | 1.376   | 0.183 |
| 1384416_at   | BE115686 | Similar to KIAA0794 protein (predicted)                                                                                                                             | RGD1306346_predicted                             | 1.263   | 0.944 | 0.897   | 0.862 | 1.103   | 0.640 | 1.042   | 0.757 |
| 1376104_at   | BG381010 | Similar to KIAA0802 protein (predicted)                                                                                                                             | RGD1308319_predicted                             | 0.907   | 0.231 | 0.664   | 0.017 | 0.711   | 0.074 | 0.649   | 0.045 |
| 1389636_at   | AI231088 | similar to KIAA0833 protein                                                                                                                                         | LOC362665                                        | 0.806   | 0.241 | 0.972   | 0.847 | 0.567   | 0.016 | 1.154   | 0.879 |
| 1379664_at   | BF419602 | similar to KIAA0853 protein (predicted)                                                                                                                             | RGD1307729_predicted                             | 1.472   | 0.024 | 2.403   | 0.079 | 1.632   | 0.026 | 1.498   | 0.078 |



|              |          |                                                           |                      |       |       |       |       |       |       |       |       |
|--------------|----------|-----------------------------------------------------------|----------------------|-------|-------|-------|-------|-------|-------|-------|-------|
| 1382080_at   | AW523680 | similar to KIAA0853 protein (predicted)                   | RGD1563689_predicted | 1.381 | 0.100 | 1.802 | 0.003 | 1.226 | 0.165 | 1.688 | 0.028 |
| 1395154_at   | BI288548 | similar to KIAA0853 protein (predicted)                   | RGD1307729_predicted | 1.050 | 0.627 | 0.935 | 0.190 | 1.339 | 0.122 | 0.722 | 0.901 |
| 1379027_at   | BM390702 | similar to KIAA0869 protein (predicted)                   | RGD1308329_predicted | 2.349 | 0.003 | 2.381 | 0.109 | 1.352 | 0.014 | 1.996 | 0.088 |
| 1378972_at   | AI071547 | Similar to KIAA0869 protein (predicted)                   | RGD1308329_predicted | 0.997 | 0.985 | 1.822 | 0.043 | 0.978 | 0.765 | 1.237 | 0.092 |
| 1394439_at   | AW523921 | similar to KIAA0892 protein (predicted)                   | RGD1308759_predicted | 1.767 | 0.248 | 0.867 | 0.578 | 0.973 | 0.989 | 0.936 | 0.928 |
| 1390315_a_at | AA875438 | similar to KIAA0913 protein (predicted)                   | RGD1309414_predicted | 1.724 | 0.081 | 0.928 | 0.290 | 1.115 | 0.575 | 0.972 | 0.444 |
| 1380979_a_at | AW523336 | similar to KIAA0913 protein (predicted)                   | RGD1309414_predicted | 1.359 | 0.573 | 1.139 | 0.053 | 1.087 | 0.559 | 1.003 | 0.939 |
| 1376414_x_at | BE109634 | similar to KIAA0913 protein (predicted)                   | RGD1309414_predicted | 1.045 | 0.752 | 1.093 | 0.400 | 1.003 | 0.963 | 1.305 | 0.002 |
| 1372629_at   | BF285818 | similar to KIAA0925 protein                               | LOC300768            | 0.727 | 0.376 | 0.693 | 0.050 | 0.729 | 0.084 | 0.618 | 0.030 |
| 1398022_at   | BF404957 | Similar to KIAA0953 protein (predicted)                   | RGD1310845_predicted | 0.928 | 0.806 | 0.789 | 0.480 | 0.931 | 0.780 | 0.842 | 0.405 |
| 1376560_at   | BM388282 | Similar to KIAA0962 protein                               | LOC362652            | 0.925 | 0.254 | 0.277 | 0.011 | 1.093 | 0.867 | 0.849 | 0.375 |
| 1383299_at   | BI291730 | Similar to KIAA0965 protein (predicted)                   | RGD1564793_predicted | 0.349 | 0.053 | 0.265 | 0.000 | 0.983 | 0.952 | 0.340 | 0.014 |
| 1373709_at   | BI281706 | similar to KIAA0974 protein                               | RGD1359592           | 0.549 | 0.211 | 0.502 | 0.007 | 0.740 | 0.018 | 0.592 | 0.099 |
| 1397289_at   | AI228245 | Similar to KIAA0974 protein                               | RGD1359592           | 0.748 | 0.669 | 1.450 | 0.327 | 0.717 | 0.289 | 1.013 | 0.687 |
| 1398951_at   | BE109021 | similar to KIAA1007 protein; adrenal gland protein AD-005 | RGD1308009           | 1.174 | 0.066 | 0.981 | 0.333 | 1.117 | 0.059 | 1.209 | 0.039 |
| 1392727_at   | AI235560 | similar to KIAA1009 protein                               | RGD1307365           | 1.256 | 0.427 | 0.712 | 0.400 | 1.002 | 0.616 | 1.000 | 0.565 |
| 1390838_at   | BE115823 | similar to KIAA1034-like DNA binding protein (predicted)  | RGD1562369_predicted | 0.910 | 0.359 | 0.996 | 0.464 | 0.885 | 0.708 | 1.062 | 0.470 |
| 1375091_at   | BE111801 | similar to KIAA1052 protein (predicted)                   | RGD1561243_predicted | 1.182 | 0.031 | 1.091 | 0.859 | 1.073 | 0.997 | 1.010 | 0.894 |
| 1392468_at   | AW526683 | similar to KIAA1078 protein (predicted)                   | RGD1310950_predicted | 0.765 | 0.012 | 0.599 | 0.015 | 0.756 | 0.021 | 0.668 | 0.032 |
| 1395080_at   | BF389061 | Similar to KIAA1078 protein (predicted)                   | RGD1310950_predicted | 0.785 | 0.127 | 1.087 | 0.710 | 1.499 | 0.670 | 1.564 | 0.068 |
| 1397201_at   | BE107286 | similar to KIAA1078 protein (predicted)                   | RGD1310950_predicted | 0.912 | 0.201 | 0.947 | 0.679 | 0.909 | 0.210 | 1.000 | 0.995 |
| 1384039_at   | BF558912 | similar to KIAA1078 protein (predicted)                   | RGD1310950_predicted | 0.747 | 0.696 | 0.569 | 0.030 | 0.809 | 0.886 | 0.602 | 0.062 |
| 1392738_at   | AI602954 | similar to KIAA1096 protein (predicted)                   | RGD1566064_predicted | 0.859 | 0.124 | 2.194 | 0.057 | 1.368 | 0.834 | 1.461 | 0.323 |
| 1398633_at   | AI136344 | Similar to KIAA1096 protein (predicted)                   | RGD1566064_predicted | 1.256 | 0.267 | 0.985 | 0.879 | 0.838 | 0.645 | 1.028 | 0.864 |
| 1399079_at   | AI101659 | similar to KIAA1096 protein (predicted)                   | RGD1307838_predicted | 1.049 | 0.795 | 1.008 | 0.121 | 1.009 | 0.278 | 1.048 | 0.327 |
| 1378155_at   | BI289641 | similar to KIAA1096 protein (predicted)                   | RGD1566064_predicted | 0.794 | 0.911 | 0.716 | 0.546 | 0.785 | 0.484 | 0.962 | 0.244 |
| 1374120_at   | BI296223 | similar to KIAA1126 protein (predicted)                   | RGD1309971_predicted | 0.973 | 0.311 | 1.575 | 0.609 | 1.106 | 0.590 | 0.713 | 0.478 |
| 1382265_at   | AI070061 | similar to KIAA1128 protein (predicted)                   | RGD1304626_predicted | 1.004 | 0.769 | 1.102 | 0.221 | 1.053 | 0.281 | 1.000 | 0.834 |
| 1373985_at   | BI282311 | Similar to KIAA1183 protein (predicted)                   | RGD1560435_predicted | 0.219 | 0.061 | 0.086 | 0.000 | 0.174 | 0.056 | 0.135 | 0.027 |
| 1385491_at   | BF403514 | similar to KIAA1183 protein (predicted)                   | RGD1560435_predicted | 0.479 | 0.098 | 0.223 | 0.002 | 0.357 | 0.135 | 0.168 | 0.009 |
| 1378978_a_at | AW520354 | Similar to KIAA1205 protein (predicted)                   | RGD1309896_predicted | 0.809 | 0.741 | 1.422 | 0.569 | 0.928 | 0.306 | 1.359 | 0.155 |
| 1378979_x_at | AW520354 | Similar to KIAA1205 protein (predicted)                   | RGD1309896_predicted | 0.967 | 0.856 | 0.787 | 0.376 | 0.762 | 0.834 | 1.066 | 0.259 |
| 1392593_a_at | AI555789 | similar to KIAA1205 protein (predicted)                   | RGD1309896_predicted | 1.193 | 0.931 | 0.910 | 0.475 | 1.093 | 0.737 | 1.219 | 0.258 |
| 1382297_x_at | AI555789 | similar to KIAA1205 protein (predicted)                   | RGD1309896_predicted | 0.877 | 0.978 | 1.042 | 0.307 | 1.112 | 0.744 | 1.075 | 0.566 |
| 1380182_at   | BF291123 | similar to KIAA1217 (predicted)                           | RGD1563437_predicted | 0.768 | 0.004 | 0.300 | 0.004 | 0.943 | 0.161 | 0.477 | 0.027 |
| 1397152_at   | BE108638 | Similar to KIAA1217 (predicted)                           | RGD1563437_predicted | 1.382 | 0.789 | 0.734 | 0.153 | 1.633 | 0.256 | 1.250 | 0.359 |
| 1383165_at   | BM390462 | similar to KIAA1324 protein (predicted)                   | RGD1310209_predicted | 0.818 | 0.180 | 0.543 | 0.000 | 0.814 | 0.087 | 0.563 | 0.002 |
| 1394760_at   | BF387238 | similar to KIAA1409 protein (predicted)                   | RGD1311117_predicted | 0.657 | 0.097 | 0.208 | 0.000 | 0.897 | 0.395 | 0.447 | 0.085 |
| 1382373_at   | AA964332 | Similar to KIAA1411 protein (predicted)                   | RGD1304927_predicted | 0.759 | 0.018 | 0.601 | 0.103 | 0.551 | 0.025 | 0.918 | 0.341 |
| 1386154_at   | AI639161 | similar to KIAA1411 protein (predicted)                   | RGD1304927_predicted | 0.730 | 0.140 | 0.884 | 0.015 | 0.442 | 0.002 | 0.931 | 0.296 |
| 1389769_at   | BI285697 | similar to KIAA1440 protein (predicted)                   | RGD1308908_predicted | 0.647 | 0.494 | 1.398 | 0.141 | 0.862 | 0.633 | 1.088 | 0.606 |
| 1383803_at   | BF283176 | Similar to KIAA1546 protein (predicted)                   | RGD1311625_predicted | 1.562 | 0.021 | 1.072 | 0.262 | 1.246 | 0.365 | 0.819 | 0.127 |
| 1376260_at   | BI274279 | similar to KIAA1627 protein (predicted)                   | RGD1304822_predicted | 0.767 | 0.055 | 1.386 | 0.035 | 0.927 | 0.294 | 1.447 | 0.026 |
| 1380900_at   | BE120504 | Similar to KIAA1731 protein (predicted)                   | RGD1311723_predicted | 0.638 | 0.027 | 0.429 | 0.006 | 0.464 | 0.170 | 0.510 | 0.042 |
| 1397811_at   | AI137142 | similar to KIAA1731 protein (predicted)                   | RGD1311723_predicted | 0.991 | 0.415 | 0.861 | 0.449 | 0.914 | 0.882 | 0.762 | 0.020 |
| 1380286_x_at | BM386844 | similar to KIAA1731 protein (predicted)                   | RGD1311723_predicted | 0.965 | 0.920 | 1.271 | 0.029 | 1.021 | 0.984 | 1.199 | 0.059 |
| 1377245_a_at | AI146147 | similar to KIAA1731 protein (predicted)                   | RGD1311723_predicted | 0.972 | 0.931 | 1.600 | 0.015 | 0.960 | 0.942 | 1.304 | 0.016 |
| 1382875_at   | BF386519 | similar to KIAA1838 protein (predicted)                   | RGD1310304_predicted | 0.702 | 0.037 | 1.405 | 0.034 | 0.854 | 0.016 | 1.138 | 0.463 |
| 1377648_at   | BF414047 | similar to KIAA1838 protein (predicted)                   | RGD1310304_predicted | 0.740 | 0.130 | 0.383 | 0.009 | 0.633 | 0.062 | 0.394 | 0.007 |
| 1383431_at   | BF404209 | Similar to KIAA1841 protein (predicted)                   | RGD1305110_predicted | 0.748 | 0.187 | 0.800 | 0.045 | 0.485 | 0.035 | 0.728 | 0.176 |
| 1393909_at   | BF544438 | similar to KIAA1841 protein (predicted)                   | RGD1305110_predicted | 0.996 | 0.975 | 0.784 | 0.007 | 1.008 | 0.917 | 0.722 | 0.008 |
| 1391805_at   | BE096676 | Similar to KIAA1900 protein (predicted)                   | RGD1310364_predicted | 1.854 | 0.012 | 1.027 | 0.127 | 1.908 | 0.006 | 1.433 | 0.141 |
| 1391767_at   | AI548603 | similar to KIAA1919 protein (predicted)                   | RGD1310495_predicted | 1.001 | 0.258 | 0.999 | 0.209 | 1.002 | 0.803 | 1.003 | 0.890 |
| 1385660_at   | AA924079 | similar to KIAA2010 protein (predicted)                   | RGD1309059_predicted | 1.199 | 0.287 | 1.343 | 0.054 | 1.406 | 0.114 | 1.102 | 0.380 |
| 1394555_at   | AI501080 | Similar to KIAA2010 protein (predicted)                   | RGD1309059_predicted | 0.904 | 0.755 | 1.638 | 0.365 | 1.432 | 0.817 | 1.088 | 0.631 |
| 1384799_at   | BF416137 | similar to KIAA2022 protein (predicted)                   | RGD1561931_predicted | 1.040 | 0.519 | 0.467 | 0.045 | 0.808 | 0.456 | 1.005 | 0.186 |
| 1390699_at   | BF390453 | similar to KIAA2026 protein                               | RGD1311595           | 1.186 | 0.518 | 1.030 | 0.801 | 1.132 | 0.158 | 1.363 | 0.096 |
| 1372811_at   | BI289779 | similar to kinectin (predicted)                           | RGD1563957_predicted | 1.236 | 0.704 | 1.304 | 0.009 | 1.118 | 0.156 | 1.283 | 0.097 |
| 1376451_at   | BG377849 | similar to krev interaction trapped-1A                    | LOC362317            | 1.562 | 0.006 | 1.355 | 0.135 | 1.773 | 0.015 | 1.666 | 0.057 |
| 1396078_at   | BF389439 | similar to krev interaction trapped-1A                    | LOC362317            | 1.066 | 0.364 | 1.215 | 0.188 | 1.156 | 0.224 | 1.108 | 0.880 |
| 1382856_at   | BI295313 | similar to Ku70-binding protein 3                         | LOC299828            | 1.866 | 0.061 | 0.807 | 0.444 | 1.951 | 0.008 | 1.143 | 0.244 |

|              |           |                                                                                                                                                             |                                       |         |       |         |       |         |       |        |       |
|--------------|-----------|-------------------------------------------------------------------------------------------------------------------------------------------------------------|---------------------------------------|---------|-------|---------|-------|---------|-------|--------|-------|
| 1398887_at   | BE113217  | similar to Late endosomal/lysosomal Mp1 interacting protein (p14) (predicted)                                                                               | RGD1562501_predicted                  | 0.692   | 0.447 | 0.715   | 0.062 | 0.693   | 0.433 | 0.900  | 0.475 |
| 1391044_s_at | BM390051  | similar to Lck-interacting transmembrane adaptor protein LIME (predicted)                                                                                   | RGD1562795_predicted                  | 0.323   | 0.111 | 0.811   | 0.082 | 1.252   | 0.961 | 0.537  | 0.038 |
| 1378810_at   | BE114206  | Similar to lemur tyrosine kinase 2                                                                                                                          | LOC304286                             | 0.902   | 0.307 | 1.207   | 0.090 | 0.910   | 0.417 | 1.162  | 0.202 |
| 1374737_at   | AW528218  | similar to Lethal giant larvae homolog 2 (predicted)                                                                                                        | RGD1560307_predicted                  | 0.912   | 0.390 | 2.009   | 0.038 | 0.968   | 0.210 | 0.947  | 0.849 |
| 1372831_at   | BE349838  | Similar to leucine zipper, down-regulated in cancer 1; breast cancer, up-regulated 1 (predicted)                                                            | RGD1306472_predicted                  | 0.269   | 0.000 | 0.287   | 0.041 | 0.473   | 0.004 | 0.625  | 0.035 |
| 1383342_at   | BE098779  | similar to Leucine-rich repeat-containing 14                                                                                                                | MGC108882                             | 0.747   | 0.333 | 0.688   | 0.033 | 0.732   | 0.328 | 0.882  | 0.677 |
| 1373168_at   | BG380214  | Similar to LEYDIG CELL TUMOR 10 KD PROTEIN                                                                                                                  | LOC288913                             | 0.515   | 0.147 | 0.902   | 0.191 | 0.552   | 0.018 | 1.144  | 0.143 |
| 1398316_at   | X62277    | similar to LEYDIG CELL TUMOR 10 KD PROTEIN                                                                                                                  | LOC288913                             | 0.856   | 0.399 | 1.250   | 0.233 | 0.702   | 0.017 | 1.760  | 0.111 |
| 1372769_at   | AI105290  | similar to ligatin                                                                                                                                          | LOC498225                             | 0.703   | 0.122 | 1.311   | 0.138 | 0.930   | 0.347 | 1.413  | 0.384 |
| 1398067_at   | BF393939  | Similar to LIM domain only 3 (predicted)                                                                                                                    | RGD1561357_predicted                  | 1.391   | 0.350 | 1.265   | 0.050 | 1.042   | 0.908 | 1.125  | 0.121 |
| 1385765_at   | BF406563  | similar to lin-9 homolog (C. elegans)                                                                                                                       | LOC360888                             | 1.193   | 0.078 | 0.769   | 0.009 | 1.027   | 0.234 | 0.817  | 0.134 |
| 1376682_at   | AI709541  | similar to lipin 3                                                                                                                                          | LOC362261                             | 1.053   | 0.756 | 1.173   | 0.149 | 1.099   | 0.984 | 1.073  | 0.063 |
| 1380839_at   | BF401620  | Similar to lipoma HMGIC fusion partner-like 3 (predicted)                                                                                                   | RGD1559727_predicted                  | 1.054   | 0.837 | 1.013   | 0.691 | 1.024   | 0.889 | 0.997  | 0.106 |
| 1374548_at   | BE104797  | Similar to Liver-expressed antimicrobial peptide 2 precursor (LEAP-2)                                                                                       | LOC497901                             | 1.099   | 0.122 | 1.172   | 0.033 | 1.223   | 0.035 | 1.287  | 0.077 |
| 1372234_at   | AA800950  | similar to Lix1 homolog (mouse) like                                                                                                                        | LOC499677                             | 1.364   | 0.333 | 1.413   | 0.021 | 1.657   | 0.065 | 1.534  | 0.021 |
| 1392070_at   | AI112117  | similar to Lix1 homolog (mouse) like                                                                                                                        | LOC499677                             | 1.056   | 0.727 | 0.811   | 0.446 | 1.542   | 0.004 | 0.994  | 0.275 |
| 1382386_at   | BI274268  | similar to Lmbr1 protein (predicted)                                                                                                                        | RGD1563910_predicted                  | 0.797   | 0.029 | 2.335   | 0.014 | 0.426   | 0.027 | 2.273  | 0.011 |
| 1376018_at   | BF398513  | similar to Lmnb2 protein (predicted)                                                                                                                        | RGD1563803_predicted                  | 0.664   | 0.384 | 1.073   | 0.300 | 0.939   | 0.307 | 0.827  | 0.033 |
| 1394537_at   | AI178429  | similar to Lmo6 protein                                                                                                                                     | LOC317380                             | 1.034   | 0.562 | 1.037   | 0.885 | 1.036   | 0.189 | 0.998  | 0.651 |
| 1372478_at   | AI137605  | similar to LNV                                                                                                                                              | LOC501065                             | 0.998   | 0.506 | 0.761   | 0.012 | 1.254   | 0.846 | 0.597  | 0.012 |
| 1373782_a_at | AW253957  | similar to LOC495800 protein                                                                                                                                | LOC499770                             | 0.505   | 0.032 | 1.022   | 0.723 | 0.863   | 0.423 | 1.160  | 0.411 |
| 1373685_at   | BI291430  | similar to low density lipoprotein receptor-related protein binding protein (predicted)                                                                     | RGD1565715_predicted                  | 0.407   | 0.000 | 2.061   | 0.186 | 0.680   | 0.303 | 1.532  | 0.074 |
| 1384440_at   | BM385619  | Similar to LRRGT00021 (predicted)                                                                                                                           | RGD1562496_predicted                  | 1.043   | 0.913 | 0.958   | 0.791 | 0.998   | 0.953 | 0.995  | 0.945 |
| 1373121_at   | BE097240  | similar to LRRGT00031                                                                                                                                       | LOC499572                             | 0.839   | 0.463 | 2.711   | 0.007 | 0.567   | 0.041 | 2.101  | 0.026 |
| 1384134_at   | AI059390  | Similar to LRRGT00057 (predicted)                                                                                                                           | RGD1563911_predicted                  | 1.028   | 0.903 | 1.044   | 0.801 | 1.860   | 0.019 | 1.120  | 0.998 |
| 1396155_at   | BF283527  | similar to LRRGT00057 (predicted) /// similar to ORF2 consensus sequence encoding endonuclease and reverse transcriptase minus RNaseH                       | RGD1564501_predicted ///<br>LOC501761 | 1.109   | 0.775 | 1.006   | 0.115 | 0.844   | 0.968 | 0.944  | 0.315 |
| 1385461_at   | AW529460  | similar to LRRGT00108 /// similar to LRRG00135 (predicted)                                                                                                  | LOC500675 ///<br>RGD1562616_predicted | 1.041   | 0.550 | 0.518   | 0.209 | 0.829   | 0.370 | 0.922  | 0.356 |
| 1393759_at   | BM385963  | similar to LRRGT00194 (predicted)                                                                                                                           | RGD1561564_predicted                  | 1.018   | 0.241 | 0.652   | 0.061 | 0.791   | 0.612 | 0.755  | 0.020 |
| 1383906_at   | BF416847  | similar to lung inducible neuralized-related C3HC4 RING finger protein                                                                                      | LOC316326                             | 178.200 | 0.000 | 117.719 | 0.003 | 255.497 | 0.000 | 99.708 | 0.001 |
| 1388347_at   | AI233210  | similar to lymphocyte antigen 6 complex, locus E                                                                                                            | LOC362934                             | 1.753   | 0.025 | 1.370   | 0.053 | 3.290   | 0.000 | 2.927  | 0.002 |
| 1393776_at   | AA955277  | Similar to lymphocyte antigen 6 complex, locus E                                                                                                            | LOC362934                             | 1.848   | 0.114 | 1.197   | 0.307 | 2.763   | 0.134 | 1.360  | 0.356 |
| 1373372_at   | BM389227  | similar to lymphocyte antigen 6 complex, locus E ligand                                                                                                     | LOC501282                             | 0.556   | 0.916 | 1.474   | 0.398 | 0.538   | 0.204 | 1.338  | 0.697 |
| 1377744_at   | BF392982  | Similar to macrophage actin-associated-tyrosine-phosphorylated protein (predicted)                                                                          | RGD1563090_predicted                  | 2.556   | 0.004 | 2.186   | 0.006 | 0.969   | 0.768 | 1.578  | 0.010 |
| 1378092_at   | AI408718  | similar to magnesium-dependent phosphatase-1 (predicted)                                                                                                    | RGD1311147_predicted                  | 0.712   | 0.252 | 0.922   | 0.710 | 0.533   | 0.082 | 1.299  | 0.168 |
| 1386266_at   | AI227948  | Similar to male sterility domain containing 1 (predicted)                                                                                                   | RGD1565966_predicted                  | 0.912   | 0.176 | 0.460   | 0.194 | 0.669   | 0.111 | 0.491  | 0.178 |
| 1382629_at   | BM383809  | similar to male sterility domain containing 2                                                                                                               | LOC499247                             | 2.422   | 0.069 | 2.793   | 0.003 | 1.713   | 0.023 | 2.435  | 0.070 |
| 1377307_at   | BM385387  | similar to mammary tumor receptor 2 isoform-like protein                                                                                                    | LOC498968                             | 0.987   | 0.460 | 0.991   | 0.571 | 1.279   | 0.350 | 1.009  | 0.835 |
| 1372029_at   | BI281957  | similar to mannose-6-phosphate receptor binding protein 1                                                                                                   | LOC316130                             | 1.002   | 0.973 | 2.173   | 0.011 | 1.002   | 0.803 | 1.449  | 0.024 |
| 1398924_at   | AA849774  | similar to mannosidase, beta A, lysosomal-like                                                                                                              | MGC109145                             | 0.982   | 0.536 | 1.789   | 0.503 | 1.156   | 0.551 | 1.905  | 0.057 |
| 1374550_at   | BI277482  | similar to map kinase interacting kinase                                                                                                                    | MGC112775                             | 1.011   | 0.938 | 0.843   | 0.002 | 0.976   | 0.897 | 0.900  | 0.439 |
| 1370141_at   | NM_021846 | similar to MAP/microtubule affinity-regulating kinase 4 (MAP/microtubule affinity-regulating kinase like 1) (predicted)                                     | RGD1561096_predicted                  | 1.418   | 0.139 | 8.571   | 0.001 | 1.743   | 0.138 | 5.501  | 0.007 |
| 1372740_at   | AA925557  | similar to Map4k6-pending protein                                                                                                                           | LOC303259                             | 0.924   | 0.303 | 1.718   | 0.005 | 1.260   | 0.061 | 1.528  | 0.038 |
| 1392133_at   | AI502069  | Similar to MAPK-interacting and spindle-stabilizing protein (predicted)                                                                                     | RGD1311455_predicted                  | 3.091   | 0.014 | 4.256   | 0.003 | 3.308   | 0.004 | 1.946  | 0.781 |
| 1382565_at   | BE108260  | Similar to MAPK-interacting and spindle-stabilizing protein (predicted)                                                                                     | RGD1311455_predicted                  | 2.217   | 0.021 | 4.200   | 0.040 | 1.700   | 0.124 | 1.866  | 0.064 |
| 1374112_at   | BI296251  | similar to MAPK-interacting and spindle-stabilizing protein (predicted)                                                                                     | RGD1565431_predicted                  | 1.093   | 0.062 | 0.816   | 0.069 | 0.840   | 0.111 | 0.736  | 0.047 |
| 1381758_at   | AI535566  | similar to MDM2 Binding protein (predicted)                                                                                                                 | RGD1565672_predicted                  | 1.237   | 0.673 | 0.739   | 0.104 | 0.960   | 0.788 | 1.181  | 0.245 |
| 1381353_at   | AI179244  | similar to melanoma antigen family A, 5                                                                                                                     | MGC114427                             | 1.340   | 0.111 | 1.053   | 0.910 | 1.545   | 0.215 | 0.984  | 0.837 |
| 1395760_at   | BF552848  | Similar to membrane protein expressed in epithelial-like lung adenocarcinoma (predicted)                                                                    | RGD1307493_predicted                  | 0.811   | 0.465 | 0.901   | 0.897 | 1.066   | 0.783 | 0.912  | 0.223 |
| 1388578_at   | BI288621  | similar to membrane targeting translocation system protein like (2A562)                                                                                     | LOC289378                             | 1.597   | 0.060 | 0.839   | 0.444 | 1.396   | 0.170 | 0.770  | 0.128 |
| 1395710_at   | BI275003  | similar to mesoderm induction early response 1 (MI-ER1) (predicted)                                                                                         | RGD1562337_predicted                  | 1.060   | 0.554 | 1.005   | 0.857 | 1.053   | 0.136 | 1.096  | 0.273 |
| 1399077_at   | AI411253  | similar to Metaxin 1, isoform 2                                                                                                                             | LOC295241                             | 0.530   | 0.031 | 1.024   | 0.030 | 0.609   | 0.046 | 1.219  | 0.118 |
| 1393094_at   | AI385367  | Similar to methyl-CpG binding protein MBD2                                                                                                                  | LOC498883                             | 1.225   | 0.494 | 0.210   | 0.004 | 0.987   | 0.802 | 0.238  | 0.005 |
| 1381280_at   | BF415212  | Similar to methylenetetrahydrofolate dehydrogenase (NAD) (EC 1.5.1.15) / methenyltetrahydrofolate cyclohydrolase (EC 3.5.4.9) precursor - mouse (predicted) | RGD1310879_predicted                  | 1.889   | 0.157 | 1.042   | 0.466 | 0.774   | 0.474 | 0.990  | 0.967 |
| 1372808_at   | AW251324  | similar to methylenetetrahydrofolate dehydrogenase (NAD) (EC 1.5.1.15)/methenyltetrahydrofolate cyclohydrolase (EC 3.5.4.9) precursor (predicted)           | RGD1564040_predicted                  | 1.045   | 0.809 | 1.410   | 0.024 | 0.855   | 0.511 | 1.359  | 0.173 |
| 1382903_at   | BF420492  | similar to mFLJ00191 protein                                                                                                                                | LOC310958                             | 1.457   | 0.253 | 2.572   | 0.006 | 0.738   | 0.474 | 2.166  | 0.013 |
| 1372872_at   | BI291271  | Similar to mFLJ00191 protein                                                                                                                                | LOC310958                             | 1.067   | 0.919 | 0.451   | 0.034 | 0.935   | 0.634 | 0.778  | 0.065 |

|            |          |                                                                                              |                      |        |       |        |       |        |       |        |       |
|------------|----------|----------------------------------------------------------------------------------------------|----------------------|--------|-------|--------|-------|--------|-------|--------|-------|
| 1377393_at | H31625   | similar to MGC14161 protein (predicted)                                                      | RGD1561554_predicted | 0.554  | 0.045 | 0.549  | 0.008 | 0.410  | 0.014 | 0.403  | 0.037 |
| 1375294_at | BF415950 | Similar to MGC14161 protein (predicted)                                                      | RGD1561554_predicted | 0.825  | 0.529 | 0.714  | 0.039 | 0.933  | 0.397 | 0.720  | 0.047 |
| 1396619_at | BF403306 | Similar to MGC14161 protein (predicted)                                                      | RGD1561554_predicted | 1.000  | 0.940 | 1.010  | 0.997 | 1.001  | 0.977 | 1.011  | 0.927 |
| 1381827_at | AW527316 | similar to MGC4645 protein (predicted)                                                       | RGD1565864_predicted | 1.275  | 0.255 | 1.395  | 0.072 | 1.430  | 0.050 | 1.008  | 0.054 |
| 1385128_at | BE108716 | Similar to MGC68837 protein (predicted)                                                      | RGD1565710_predicted | 2.320  | 0.045 | 1.044  | 0.879 | 2.493  | 0.116 | 1.953  | 0.046 |
| 1379577_at | AW527171 | similar to MIC2L1 (predicted)                                                                | RGD1559441_predicted | 1.004  | 0.993 | 0.942  | 0.049 | 1.120  | 0.583 | 1.213  | 0.148 |
| 1379153_at | BF387484 | Similar to microfilament and actin filament cross-linker protein isoform a                   | LOC362587            | 0.668  | 0.118 | 0.661  | 0.291 | 0.683  | 0.235 | 0.656  | 0.007 |
| 1371940_at | AW920000 | similar to microfilament and actin filament cross-linker protein isoform a                   | LOC362587            | 0.992  | 0.890 | 0.589  | 0.014 | 0.869  | 0.240 | 0.682  | 0.084 |
| 1373333_at | AI102732 | similar to Microsomal signal peptidase 23 kDa subunit (SPase 22 kDa subunit) (SPC22/23)      | MGC109340            | 0.826  | 0.532 | 0.512  | 0.016 | 0.526  | 0.180 | 0.395  | 0.010 |
| 1386090_at | BF289454 | similar to minichromosome maintenance protein 8 isoform 1 (predicted)                        | RGD1560557_predicted | 1.057  | 0.709 | 1.265  | 0.986 | 0.763  | 0.074 | 0.765  | 0.162 |
| 1379748_at | AA819629 | Similar to minor histocompatibility antigen precursor                                        | LOC310968            | 19.808 | 0.002 | 12.384 | 0.003 | 46.552 | 0.000 | 39.999 | 0.002 |
| 1373020_at | BG379323 | similar to mitochondria-associated granulocyte macrophage CSF signaling molecule (predicted) | RGD1564452_predicted | 0.698  | 0.085 | 1.492  | 0.046 | 0.680  | 0.070 | 1.355  | 0.000 |
| 1379632_at | AI502790 | Similar to mitochondrial carrier family protein                                              | RGD1308774           | 0.369  | 0.035 | 0.496  | 0.028 | 0.446  | 0.007 | 0.603  | 0.106 |
| 1380307_at | AI556551 | Similar to mitochondrial carrier family protein                                              | RGD1308774           | 1.359  | 0.477 | 0.885  | 0.463 | 1.156  | 0.859 | 1.038  | 0.672 |
| 1395621_at | H33102   | similar to Mitochondrial carrier triple repeat 1 (predicted)                                 | RGD1565119_predicted | 0.845  | 0.802 | 1.179  | 0.240 | 0.879  | 0.673 | 0.675  | 0.010 |
| 1371649_at | BI289411 | similar to mitochondrial ribosomal protein S24 (predicted)                                   | RGD1564681_predicted | 0.503  | 0.258 | 1.052  | 0.612 | 0.436  | 0.010 | 0.780  | 0.983 |
| 1397264_at | AA859819 | Similar to mitochondrial tryptophanyl tRNA synthetase 2 (predicted)                          | RGD1565226_predicted | 1.064  | 0.282 | 0.999  | 0.977 | 0.926  | 0.744 | 1.017  | 0.934 |
| 1372977_at | BI291366 | similar to mitogen-activated protein kinase kinase kinase 5 isoform 2 (predicted)            | RGD1562028_predicted | 1.001  | 0.976 | 1.289  | 0.986 | 0.906  | 0.533 | 1.106  | 0.346 |
| 1383558_at | BI290282 | similar to MJ0495-like protein SelB (predicted)                                              | RGD1560552_predicted | 0.349  | 0.077 | 1.843  | 0.048 | 0.344  | 0.006 | 1.941  | 0.010 |
| 1372010_at | BF283797 | similar to MK-5 type 2                                                                       | MGC116327            | 0.897  | 0.771 | 1.687  | 0.024 | 0.645  | 0.005 | 1.260  | 0.099 |
| 1374799_at | AI407418 | similar to mKIAA0159 protein (predicted)                                                     | RGD1562596_predicted | 0.844  | 0.056 | 0.934  | 0.553 | 0.879  | 0.689 | 0.605  | 0.481 |
| 1395248_at | BF418342 | similar to mKIAA0212 protein (predicted)                                                     | RGD1563633_predicted | 1.335  | 0.475 | 1.517  | 0.110 | 1.166  | 0.070 | 1.198  | 0.421 |
| 1384186_at | AI556447 | similar to mKIAA0212 protein (predicted)                                                     | RGD1563633_predicted | 1.724  | 0.522 | 1.045  | 0.893 | 1.593  | 0.096 | 0.926  | 0.441 |
| 1383528_at | BI276223 | similar to mKIAA0215 protein (predicted)                                                     | RGD1563945_predicted | 0.709  | 0.058 | 1.125  | 0.575 | 0.532  | 0.074 | 1.143  | 0.192 |
| 1376013_at | BF282700 | similar to mKIAA0227 protein (predicted)                                                     | RGD1565985_predicted | 0.769  | 0.164 | 0.801  | 0.851 | 0.568  | 0.009 | 0.756  | 0.025 |
| 1392632_at | AI044816 | similar to mKIAA0227 protein (predicted)                                                     | RGD1565985_predicted | 1.003  | 0.995 | 0.885  | 0.473 | 1.005  | 0.964 | 0.766  | 0.664 |
| 1381958_at | BE107587 | similar to mKIAA0259 protein (predicted)                                                     | RGD1562949_predicted | 0.715  | 0.203 | 1.213  | 0.311 | 0.318  | 0.011 | 0.943  | 0.780 |
| 1379061_at | BI290700 | similar to mKIAA0323 protein (predicted)                                                     | RGD1565688_predicted | 1.000  | 0.991 | 2.436  | 0.068 | 1.001  | 0.661 | 1.153  | 0.641 |
| 1385004_at | BE107527 | Similar to mKIAA0376 protein                                                                 | RGD1309570           | 1.004  | 0.615 | 0.999  | 0.188 | 1.319  | 0.241 | 1.012  | 0.941 |
| 1377190_at | AI010237 | Similar to mKIAA0386 protein                                                                 | RGD1306939           | 1.512  | 0.250 | 1.157  | 0.827 | 1.393  | 0.260 | 1.005  | 0.384 |
| 1374766_at | BE103616 | Similar to mKIAA0493 protein (predicted)                                                     | RGD1564703_predicted | 0.440  | 0.000 | 0.443  | 0.000 | 0.566  | 0.002 | 0.431  | 0.004 |
| 1385408_at | BI288589 | similar to mKIAA0518 protein (predicted)                                                     | RGD1561597_predicted | 2.491  | 0.097 | 1.330  | 0.395 | 1.357  | 0.075 | 1.581  | 0.023 |
| 1371984_at | AI598442 | Similar to mKIAA0613 protein (predicted)                                                     | RGD1564875_predicted | 0.930  | 0.950 | 1.045  | 0.534 | 1.011  | 0.952 | 0.912  | 0.451 |
| 1389129_at | BF282876 | similar to mKIAA0665 protein                                                                 | RGD1308952           | 1.549  | 0.102 | 1.534  | 0.307 | 1.174  | 0.167 | 1.118  | 0.516 |
| 1390200_at | BM388794 | similar to mKIAA0674 protein (predicted)                                                     | RGD1304816_predicted | 1.231  | 0.348 | 1.296  | 0.231 | 1.421  | 0.091 | 1.143  | 0.479 |
| 1384616_at | AW523666 | similar to mKIAA0674 protein (predicted)                                                     | RGD1304816_predicted | 0.991  | 0.655 | 1.086  | 0.124 | 1.005  | 0.052 | 1.197  | 0.563 |
| 1389672_at | BI301467 | similar to mKIAA0701 protein                                                                 | LOC363009            | 0.816  | 0.046 | 0.545  | 0.018 | 0.830  | 0.532 | 0.631  | 0.208 |
| 1392559_at | BM383442 | similar to mKIAA0701 protein                                                                 | LOC363009            | 0.949  | 0.969 | 2.146  | 0.011 | 0.973  | 0.889 | 1.946  | 0.051 |
| 1384110_at | AI045668 | similar to mKIAA0716 protein (predicted)                                                     | RGD1561724_predicted | 2.479  | 0.003 | 0.500  | 0.040 | 3.508  | 0.001 | 0.896  | 0.701 |
| 1397226_at | AI100942 | similar to mKIAA0716 protein (predicted)                                                     | RGD1561724_predicted | 2.549  | 0.024 | 0.839  | 0.059 | 2.329  | 0.024 | 0.932  | 0.141 |
| 1376034_at | AW141824 | similar to mKIAA0738 protein (predicted)                                                     | RGD1565474_predicted | 0.741  | 0.136 | 0.407  | 0.007 | 0.620  | 0.483 | 0.715  | 0.032 |
| 1380309_at | BI273829 | similar to mKIAA0804 protein (predicted)                                                     | RGD1309443_predicted | 0.962  | 0.949 | 1.138  | 0.348 | 1.018  | 0.485 | 1.182  | 0.143 |
| 1374576_at | BF283857 | similar to mKIAA0841 protein (predicted)                                                     | RGD1564266_predicted | 1.005  | 0.887 | 1.389  | 0.055 | 0.946  | 0.556 | 1.041  | 0.995 |
| 1397368_at | BE120588 | Similar to mKIAA0843 protein (predicted)                                                     | RGD1565118_predicted | 0.680  | 0.497 | 1.224  | 0.544 | 0.633  | 0.286 | 1.021  | 0.596 |
| 1391528_at | AA858509 | similar to mKIAA0863 protein (predicted)                                                     | RGD1308279_predicted | 0.720  | 0.098 | 0.685  | 0.135 | 0.721  | 0.488 | 1.033  | 0.808 |
| 1382552_at | AW522677 | similar to mKIAA0934 protein (predicted)                                                     | RGD1560155_predicted | 1.038  | 0.470 | 2.062  | 0.007 | 0.580  | 0.026 | 1.725  | 0.003 |
| 1380969_at | BE106363 | Similar to mKIAA0940 protein (predicted)                                                     | RGD1564670_predicted | 1.423  | 0.637 | 0.998  | 0.804 | 0.894  | 0.473 | 0.733  | 0.141 |
| 1378147_at | BE109576 | similar to mKIAA0978 protein (predicted)                                                     | RGD1561878_predicted | 1.163  | 0.858 | 1.635  | 0.142 | 1.424  | 0.068 | 1.365  | 0.088 |
| 1398493_at | BG377873 | Similar to mKIAA0981 protein                                                                 | LOC316457            | 1.138  | 0.597 | 0.879  | 0.136 | 1.152  | 0.280 | 0.930  | 0.566 |
| 1379916_at | BE108030 | Similar to mKIAA0998 protein (predicted)                                                     | RGD1563583_predicted | 1.003  | 0.771 | 0.998  | 0.930 | 1.018  | 0.866 | 1.005  | 0.975 |
| 1373814_at | BI291270 | similar to mKIAA1002 protein                                                                 | RGD1310066           | 2.607  | 0.021 | 1.239  | 0.737 | 1.118  | 0.795 | 1.019  | 0.582 |
| 1382066_at | AI549105 | similar to mKIAA1002 protein                                                                 | RGD1310066           | 1.216  | 0.622 | 0.299  | 0.120 | 0.713  | 0.439 | 0.703  | 0.759 |
| 1381422_at | AA817889 | Similar to mKIAA1002 protein                                                                 | RGD1310066           | 1.393  | 0.999 | 0.703  | 0.468 | 1.141  | 0.084 | 0.822  | 0.996 |
| 1377653_at | BI293195 | similar to mKIAA1011 protein                                                                 | LOC366669            | 1.482  | 0.944 | 0.884  | 0.474 | 1.370  | 0.529 | 0.856  | 0.106 |
| 1374322_at | AA893980 | similar to MKIAA1064 protein                                                                 | LOC499087            | 0.895  | 0.182 | 0.311  | 0.006 | 1.362  | 0.299 | 0.466  | 0.032 |
| 1392148_at | BF391605 | Similar to mKIAA1107 protein (predicted)                                                     | RGD1306921_predicted | 0.181  | 0.008 | 0.613  | 0.019 | 0.445  | 0.073 | 0.516  | 0.044 |
| 1373179_at | BI300727 | similar to mKIAA1107 protein (predicted)                                                     | RGD1306921_predicted | 0.144  | 0.018 | 0.481  | 0.006 | 0.199  | 0.017 | 0.388  | 0.096 |
| 1397758_at | BI301535 | Similar to mKIAA1208 protein (predicted)                                                     | RGD1564821_predicted | 0.806  | 0.083 | 0.676  | 0.012 | 0.667  | 0.096 | 0.573  | 0.022 |
| 1382584_at | BE116720 | similar to mKIAA1321 protein (predicted)                                                     | RGD1564405_predicted | 1.424  | 0.156 | 1.275  | 0.280 | 1.434  | 0.350 | 1.448  | 0.171 |
| 1381586_at | BI296171 | similar to mKIAA1386 protein                                                                 | LOC368062            | 1.178  | 0.020 | 0.997  | 0.965 | 1.009  | 0.882 | 0.998  | 0.950 |
| 1377657_at | AW525218 | Similar to mKIAA1417 protein (predicted)                                                     | RGD1565019_predicted | 0.908  | 0.032 | 0.935  | 0.575 | 1.026  | 0.771 | 1.015  | 0.965 |

|              |          |                                                                                                                        |                                                                   |        |       |        |       |         |       |        |       |
|--------------|----------|------------------------------------------------------------------------------------------------------------------------|-------------------------------------------------------------------|--------|-------|--------|-------|---------|-------|--------|-------|
| 1374230_at   | BI395805 | Similar to mKIAA1429 protein (predicted)                                                                               | RGD1559904_predicted                                              | 0.497  | 0.668 | 0.550  | 0.003 | 0.521   | 0.087 | 0.674  | 0.024 |
| 1391192_at   | BF414558 | Similar to mKIAA1429 protein (predicted)                                                                               | RGD1559904_predicted                                              | 0.817  | 0.773 | 0.921  | 0.119 | 1.280   | 0.890 | 1.009  | 0.958 |
| 1392548_at   | BF394282 | similar to mKIAA1604 protein (predicted)                                                                               | RGD1565385_predicted                                              | 1.384  | 0.994 | 1.361  | 0.051 | 0.657   | 0.077 | 0.984  | 0.159 |
| 1374725_at   | AW252811 | similar to mKIAA1631 protein                                                                                           | LOC310756                                                         | 32.943 | 0.002 | 13.783 | 0.002 | 74.845  | 0.005 | 13.632 | 0.010 |
| 1381820_at   | BI286742 | Similar to mKIAA1631 protein                                                                                           | LOC310756                                                         | 1.544  | 0.586 | 2.497  | 0.348 | 2.016   | 0.092 | 1.086  | 0.875 |
| 1392900_at   | AW888327 | Similar to mKIAA1631 protein                                                                                           | LOC310756                                                         | 1.058  | 0.754 | 0.988  | 0.901 | 1.170   | 0.579 | 1.189  | 0.098 |
| 1379139_x_at | BF406217 | Similar to mKIAA1737 protein (predicted)                                                                               | RGD1309492_predicted                                              | 1.963  | 0.317 | 1.003  | 0.473 | 0.808   | 0.303 | 0.809  | 0.435 |
| 1374568_at   | BF284775 | Similar to mKIAA1737 protein (predicted)                                                                               | RGD1309492_predicted                                              | 1.158  | 0.906 | 1.279  | 0.029 | 1.091   | 0.829 | 1.298  | 0.009 |
| 1386311_at   | AI008479 | Similar to mKIAA1737 protein (predicted)                                                                               | RGD1309492_predicted                                              | 1.242  | 0.956 | 0.807  | 0.284 | 1.105   | 0.181 | 0.548  | 0.546 |
| 1378705_at   | AW254450 | similar to mKIAA1757 protein (predicted)                                                                               | RGD1310433_predicted                                              | 1.690  | 0.015 | 1.044  | 0.828 | 1.320   | 0.091 | 0.960  | 0.577 |
| 1399070_at   | AI180081 | similar to mKIAA1757 protein (predicted)                                                                               | RGD1310433_predicted                                              | 2.115  | 0.045 | 3.652  | 0.043 | 1.089   | 0.366 | 2.317  | 0.000 |
| 1391170_at   | BE115521 | similar to mKIAA1757 protein (predicted)                                                                               | RGD1310433_predicted                                              | 1.257  | 0.087 | 1.595  | 0.052 | 1.438   | 0.477 | 1.175  | 0.386 |
| 1373330_at   | AI406704 | similar to mKIAA1783 protein (predicted)                                                                               | RGD1560214_predicted                                              | 0.476  | 0.019 | 0.284  | 0.002 | 0.496   | 0.027 | 0.195  | 0.013 |
| 1372614_at   | BF390044 | similar to mKIAA1797 protein (predicted)                                                                               | RGD1311849_predicted                                              | 0.603  | 0.629 | 1.157  | 0.979 | 0.503   | 0.052 | 0.907  | 0.315 |
| 1398115_at   | BF393962 | Similar to mKIAA1797 protein (predicted)                                                                               | RGD1311849_predicted                                              | 1.371  | 0.701 | 0.839  | 0.137 | 0.891   | 0.936 | 1.005  | 0.790 |
| 1374364_at   | BI277805 | similar to mKIAA1931 protein (predicted)                                                                               | RGD1562335_predicted                                              | 0.958  | 0.356 | 1.219  | 0.169 | 1.307   | 0.441 | 0.992  | 0.913 |
| 1380079_at   | AW533923 | similar to mKIAA2005 protein                                                                                           | LOC500015                                                         | 5.842  | 0.001 | 1.530  | 0.183 | 34.077  | 0.001 | 9.980  | 0.018 |
| 1376920_at   | BF408536 | similar to mKIAA2005 protein (predicted) /// similar to mKIAA2005 protein (predicted) /// similar to mKIAA2005 protein | RGD1561472_predicted ///<br>RGD1563965_predicted ///<br>LOC500015 | 58.330 | 0.000 | 11.098 | 0.008 | 239.421 | 0.000 | 51.352 | 0.001 |
| 1390312_at   | BG670441 | similar to mKIAA2005 protein (predicted) /// similar to mKIAA2005 protein (predicted) /// similar to mKIAA2005 protein | RGD1561472_predicted ///<br>RGD1563965_predicted ///<br>LOC500015 | 7.621  | 0.044 | 1.343  | 0.001 | 51.275  | 0.001 | 14.989 | 0.007 |
| 1397528_at   | BE112252 | Similar to mKIAA3013 protein                                                                                           | LOC312030                                                         | 0.887  | 0.035 | 1.032  | 0.873 | 0.839   | 0.054 | 0.946  | 0.930 |
| 1376049_at   | AA925805 | Similar to mKIAA3013 protein                                                                                           | LOC312030                                                         | 0.504  | 0.086 | 0.612  | 0.199 | 0.574   | 0.057 | 1.005  | 0.960 |
| 1374154_at   | AI411610 | Similar to mKIAA3013 protein                                                                                           | LOC312030                                                         | 1.430  | 0.101 | 2.892  | 0.001 | 1.028   | 0.900 | 2.498  | 0.002 |
| 1383043_at   | AA955140 | Similar to mKIAA3013 protein                                                                                           | LOC312030                                                         | 1.372  | 0.200 | 1.398  | 0.108 | 0.957   | 0.864 | 1.085  | 0.979 |
| 1373303_at   | BM383325 | similar to mKIAA3013 protein                                                                                           | LOC312030                                                         | 1.008  | 0.950 | 1.638  | 0.116 | 0.588   | 0.168 | 1.350  | 0.262 |
| 1373496_at   | AI137294 | similar to Mkrn1 protein                                                                                               | MGC94941                                                          | 1.054  | 0.447 | 1.073  | 0.777 | 0.697   | 0.164 | 1.351  | 0.306 |
| 1376626_at   | AI145815 | similar to Mkrn1 protein                                                                                               | MGC94941                                                          | 0.920  | 0.734 | 1.516  | 0.016 | 0.888   | 0.586 | 1.315  | 0.026 |
| 1372606_at   | BM390528 | Similar to MLTK-beta (predicted)                                                                                       | RGD1561394_predicted                                              | 1.130  | 0.901 | 2.446  | 0.032 | 1.888   | 0.025 | 5.793  | 0.006 |
| 1371998_at   | AI176611 | similar to Mob4B protein                                                                                               | MGC124888                                                         | 1.187  | 0.037 | 1.591  | 0.031 | 1.127   | 0.166 | 1.371  | 0.016 |
| 1392961_at   | AW534383 | similar to Mob4B protein                                                                                               | MGC124888                                                         | 1.687  | 0.473 | 1.427  | 0.158 | 2.333   | 0.704 | 1.277  | 0.465 |
| 1397372_at   | BI289004 | similar to Mob4B protein                                                                                               | MGC124888                                                         | 1.055  | 0.531 | 0.857  | 0.992 | 1.410   | 0.099 | 0.780  | 0.273 |
| 1388820_at   | BI286365 | similar to modulator of estrogen induced transcription                                                                 | RGD1307526                                                        | 0.951  | 0.222 | 2.156  | 0.001 | 0.917   | 0.359 | 1.941  | 0.004 |
| 1390989_at   | BG667374 | similar to Mospd2 protein (predicted)                                                                                  | RGD1563952_predicted                                              | 0.662  | 0.844 | 0.775  | 0.002 | 0.864   | 0.454 | 0.759  | 0.141 |
| 1382743_at   | AI578576 | Similar to mouse LOC212632                                                                                             | LOC641315                                                         | 2.296  | 0.034 | 2.609  | 0.044 | 1.134   | 0.628 | 1.435  | 0.072 |
| 1371720_at   | AI599839 | similar to Mrpl20 protein (predicted)                                                                                  | RGD1562345_predicted                                              | 0.389  | 0.274 | 0.275  | 0.018 | 0.376   | 0.042 | 0.553  | 0.344 |
| 1373705_at   | AI235502 | similar to Mrpl28 protein                                                                                              | LOC497876                                                         | 0.520  | 0.004 | 0.624  | 0.063 | 0.527   | 0.002 | 0.776  | 0.149 |
| 1379831_at   | AW252506 | similar to multiple hat domains (predicted)                                                                            | RGD1311017_predicted                                              | 0.880  | 0.742 | 1.046  | 0.889 | 0.721   | 0.057 | 0.727  | 0.294 |
| 1393595_at   | BI289182 | similar to multiple hat domains (predicted)                                                                            | RGD1311017_predicted                                              | 0.865  | 0.765 | 0.944  | 0.437 | 0.942   | 0.998 | 0.942  | 0.160 |
| 1391786_at   | BI297047 | Similar to Murine homolog of human ftp-3                                                                               | LOC308650                                                         | 1.032  | 0.863 | 0.578  | 0.006 | 1.578   | 0.012 | 0.661  | 0.056 |
| 1373635_at   | BF393090 | similar to Myb protein P42POP (predicted)                                                                              | RGD1565160_predicted                                              | 0.838  | 0.273 | 0.790  | 0.131 | 0.939   | 0.468 | 0.782  | 0.128 |
| 1371877_at   | BM391502 | similar to MYLE protein (Dexamethasone-induced protein) (predicted)                                                    | RGD1564938_predicted                                              | 0.557  | 0.003 | 0.943  | 0.558 | 0.724   | 0.205 | 0.689  | 0.945 |
| 1389165_at   | AI178292 | similar to myocardial ischemic preconditioning upregulated protein 2 (predicted)                                       | RGD1565589_predicted                                              | 1.096  | 0.224 | 1.354  | 0.037 | 0.670   | 0.059 | 1.222  | 0.052 |
| 1394400_at   | BF542890 | Similar to myocardial ischemic preconditioning upregulated protein 2 (predicted)                                       | RGD1565589_predicted                                              | 0.953  | 0.417 | 0.860  | 0.730 | 1.297   | 0.550 | 0.751  | 0.301 |
| 1392472_at   | BI281877 | similar to myocyte enhancer factor 2C                                                                                  | LOC309957                                                         | 1.160  | 0.141 | 2.846  | 0.015 | 1.195   | 0.994 | 1.665  | 0.046 |
| 1371817_at   | BI285489 | similar to myo-inositol 1-phosphate synthase A1                                                                        | LOC290651                                                         | 0.585  | 0.018 | 1.467  | 0.014 | 0.768   | 0.173 | 1.013  | 0.933 |







|              |          |                                                                                                                                                       |                      |       |       |       |       |        |       |       |       |
|--------------|----------|-------------------------------------------------------------------------------------------------------------------------------------------------------|----------------------|-------|-------|-------|-------|--------|-------|-------|-------|
| 1389023_at   | AI599504 | Similar to Oligosaccharyl transferase 3 CG7748-PA                                                                                                     | RGD1311563           | 0.588 | 0.245 | 0.530 | 0.001 | 0.656  | 0.023 | 0.572 | 0.002 |
| 1383631_at   | BI296244 | similar to Oligosaccharyl transferase 3 CG7748-PA                                                                                                     | RGD1311563           | 0.466 | 0.298 | 0.961 | 0.304 | 0.566  | 0.103 | 0.763 | 0.086 |
| 1382057_at   | AI058311 | similar to oocyte-testis gene 1 (predicted)                                                                                                           | RGD1564078_predicted | 0.909 | 0.843 | 0.706 | 0.248 | 0.673  | 0.187 | 0.924 | 0.225 |
| 1385070_at   | BE111420 | Similar to Opa-interacting protein 5 (predicted)                                                                                                      | RGD1564263_predicted | 1.772 | 0.042 | 0.998 | 0.524 | 0.997  | 0.965 | 1.003 | 0.988 |
| 1388575_at   | AA943740 | Similar to Opa-interacting protein 5 (predicted)                                                                                                      | RGD1564263_predicted | 0.873 | 0.229 | 0.695 | 0.068 | 1.816  | 0.474 | 1.044 | 0.730 |
| 1373743_at   | BI295567 | similar to open reading frame 5                                                                                                                       | RGD1305062           | 0.979 | 0.178 | 0.862 | 0.762 | 1.295  | 0.065 | 0.996 | 0.386 |
| 1391147_at   | BF404398 | Similar to opioid growth factor receptor (predicted)                                                                                                  | RGD1562096_predicted | 1.273 | 0.122 | 1.001 | 0.750 | 1.130  | 0.586 | 0.775 | 0.050 |
| 1374264_at   | BM384751 | similar to ORC5-related protein                                                                                                                       | LOC362304            | 0.946 | 0.209 | 1.141 | 0.135 | 1.160  | 0.180 | 0.903 | 0.852 |
| 1398939_at   | BF284885 | similar to ORM1-like 3                                                                                                                                | LOC360618            | 0.712 | 0.374 | 1.205 | 0.134 | 0.844  | 0.057 | 1.043 | 0.828 |
| 1396763_at   | BF412954 | Similar to ortholog of human amyotrophic lateral sclerosis 2 (juvenile) chromosome region, candidate 19 (ALS2CR19)                                    | LOC301455            | 0.772 | 0.767 | 0.810 | 0.074 | 3.504  | 0.175 | 1.039 | 0.116 |
| 1390793_at   | BI295759 | similar to osmosis responsive factor (predicted)                                                                                                      | RGD1564042_predicted | 0.932 | 0.930 | 0.638 | 0.358 | 0.554  | 0.324 | 0.967 | 0.458 |
| 1397904_at   | BI292042 | Similar to osteoclast inhibitory lectin (predicted)                                                                                                   | RGD1563148_predicted | 2.727 | 0.016 | 1.185 | 0.155 | 4.266  | 0.003 | 3.489 | 0.039 |
| 1397676_at   | BF290784 | Similar to osteoclast inhibitory lectin (predicted)                                                                                                   | RGD1563148_predicted | 2.837 | 0.019 | 1.974 | 0.003 | 5.531  | 0.000 | 2.855 | 0.001 |
| 1383862_at   | BF404050 | Similar to osteoclast inhibitory lectin (predicted)                                                                                                   | RGD1563148_predicted | 1.507 | 0.160 | 1.244 | 0.024 | 2.256  | 0.026 | 2.181 | 0.054 |
| 1384752_at   | BF407755 | similar to osteoclast inhibitory lectin (predicted)                                                                                                   | RGD1563033_predicted | 1.165 | 0.957 | 1.186 | 0.420 | 1.149  | 0.477 | 0.970 | 0.747 |
| 1398581_at   | AA956307 | similar to osteopetrosis associated transmembrane protein 1                                                                                           | LOC365611            | 0.707 | 0.131 | 0.408 | 0.000 | 0.555  | 0.009 | 0.379 | 0.018 |
| 1395454_at   | AW920180 | similar to osteopetrosis associated transmembrane protein 1                                                                                           | LOC499474            | 0.916 | 0.665 | 1.260 | 0.033 | 1.043  | 0.358 | 1.317 | 0.027 |
| 1389144_at   | AA818759 | similar to OTTHUMP0000018508 (predicted)                                                                                                              | RGD1560745_predicted | 1.194 | 0.792 | 1.693 | 0.184 | 1.165  | 1.000 | 1.550 | 0.074 |
| 1384428_at   | AI043872 | similar to OTTHUMP0000040081 (predicted)                                                                                                              | RGD1566403_predicted | 0.946 | 0.436 | 1.281 | 0.277 | 0.679  | 0.336 | 1.248 | 0.128 |
| 1397780_at   | BE096283 | similar to OTTHUMP0000040479 (predicted)                                                                                                              | RGD1564192_predicted | 1.089 | 0.138 | 0.965 | 0.817 | 1.759  | 0.067 | 0.968 | 0.673 |
| 1373898_at   | BM387873 | similar to OTTHUMP0000042400                                                                                                                          | LOC360760            | 1.412 | 0.041 | 0.937 | 0.072 | 1.385  | 0.050 | 0.991 | 0.835 |
| 1384254_at   | AI717553 | similar to OTU domain containing 1 (predicted)                                                                                                        | RGD1563344_predicted | 5.435 | 0.000 | 4.414 | 0.000 | 4.964  | 0.004 | 3.758 | 0.000 |
| 1389614_at   | AI172472 | similar to ovary-specific MOB-like protein (predicted)                                                                                                | RGD1562983_predicted | 0.997 | 0.862 | 1.122 | 0.216 | 0.724  | 0.134 | 0.881 | 0.526 |
| 1388646_at   | BM391469 | similar to p150 target of rapamycin (TOR)-scaffold protein containing WD-repeats (predicted)                                                          | RGD1311784_predicted | 0.603 | 0.206 | 0.368 | 0.006 | 0.536  | 0.003 | 0.354 | 0.012 |
| 1382275_at   | AI236989 | similar to PAK/PLC-interacting protein 1                                                                                                              | MGC125015            | 0.886 | 0.645 | 1.909 | 0.000 | 1.068  | 0.995 | 1.198 | 0.122 |
| 1389918_at   | BM391364 | similar to palladin                                                                                                                                   | LOC290704            | 4.315 | 0.013 | 3.869 | 0.002 | 1.726  | 0.131 | 3.057 | 0.047 |
| 1384253_at   | AW251334 | similar to palladin; CGI-151 protein                                                                                                                  | LOC364558            | 0.696 | 0.020 | 0.276 | 0.004 | 0.888  | 0.535 | 0.641 | 0.204 |
| 1383324_at   | AI703599 | Similar to PALS2-alpha splice variant (predicted)                                                                                                     | RGD1562141_predicted | 1.422 | 0.006 | 3.731 | 0.000 | 1.276  | 0.102 | 2.171 | 0.008 |
| 1398627_at   | AA819889 | Similar to PALS2-alpha splice variant (predicted)                                                                                                     | RGD1562141_predicted | 1.483 | 0.200 | 0.626 | 0.102 | 0.836  | 0.226 | 0.762 | 0.108 |
| 1397419_at   | AI101314 | Similar to PALS2-alpha splice variant (predicted)                                                                                                     | RGD1562141_predicted | 1.272 | 0.256 | 1.663 | 0.052 | 0.957  | 0.788 | 1.665 | 0.026 |
| 1391825_at   | BE120422 | Similar to part of a novel protein (predicted)                                                                                                        | RGD1562324_predicted | 0.409 | 0.013 | 1.041 | 0.572 | 0.335  | 0.011 | 0.863 | 0.370 |
| 1390366_at   | BI291884 | similar to PC-LKC gene product (predicted)                                                                                                            | RGD1560576_predicted | 0.857 | 0.759 | 0.511 | 0.346 | 0.671  | 0.109 | 0.841 | 0.710 |
| 1392556_at   | BF410961 | similar to PDZ domain actin binding protein Shroom                                                                                                    | RGD1310470           | 1.319 | 0.065 | 1.143 | 0.322 | 1.411  | 0.339 | 1.136 | 0.309 |
| 1388664_at   | BI282719 | similar to PDZ-domain protein scribble (predicted)                                                                                                    | RGD1565055_predicted | 1.004 | 0.696 | 1.272 | 0.430 | 1.078  | 0.864 | 0.929 | 0.613 |
| 1399081_at   | AI712911 | similar to pellino protein (predicted)                                                                                                                | RGD1564594_predicted | 2.209 | 0.032 | 1.003 | 0.720 | 3.057  | 0.018 | 1.002 | 0.404 |
| 1396292_at   | BG379069 | Similar to peptide N-glycanase                                                                                                                        | LOC361014            | 0.440 | 0.005 | 0.880 | 0.310 | 0.700  | 0.013 | 0.831 | 0.303 |
| 1384205_at   | BM385969 | similar to peptide N-glycanase                                                                                                                        | LOC361014            | 0.732 | 0.173 | 0.957 | 0.427 | 0.781  | 0.165 | 1.019 | 0.800 |
| 1398480_at   | AW531492 | similar to Peroxidasin CG12002-PA (predicted)                                                                                                         | RGD1308720_predicted | 0.997 | 0.991 | 0.992 | 0.994 | 0.999  | 0.997 | 0.996 | 0.986 |
| 1390531_at   | BE098021 | Similar to Peroxisomal proliferator-activated receptor A interacting complex 285 kDa protein (PPAR-alpha interacting complex protein 285) (predicted) | RGD1306056_predicted | 7.195 | 0.001 | 1.755 | 0.052 | 13.438 | 0.003 | 4.269 | 0.004 |
| 1376595_at   | BF282695 | similar to peroxisome biogenesis factor 1 (predicted)                                                                                                 | RGD1559939_predicted | 0.838 | 0.100 | 0.282 | 0.001 | 1.093  | 0.405 | 0.519 | 0.051 |
| 1385561_at   | BF561031 | similar to peroxisome biogenesis factor 1 (predicted)                                                                                                 | RGD1559939_predicted | 1.014 | 0.997 | 0.600 | 0.118 | 1.012  | 0.999 | 0.599 | 0.121 |
| 1390506_at   | BF396678 | similar to peroxisome proliferator-activated receptor binding protein (predicted)                                                                     | RGD1559552_predicted | 1.175 | 0.166 | 1.289 | 0.080 | 1.534  | 0.142 | 1.782 | 0.095 |
| 1384962_at   | BI295735 | similar to peroxisome proliferator-activated receptor binding protein (predicted)                                                                     | RGD1559552_predicted | 1.114 | 0.984 | 3.612 | 0.100 | 1.112  | 0.970 | 1.047 | 0.919 |
| 1379520_at   | BE103550 | Similar to PEST-containing nuclear protein                                                                                                            | LOC288165            | 3.447 | 0.027 | 0.858 | 0.497 | 2.238  | 0.049 | 0.635 | 0.116 |
| 1389040_at   | AI170825 | similar to PEST-containing nuclear protein                                                                                                            | LOC288165            | 0.766 | 0.517 | 0.603 | 0.007 | 1.003  | 0.590 | 0.695 | 0.012 |
| 1391426_a_at | AI578071 | similar to PEST-containing nuclear protein                                                                                                            | LOC288165            | 1.094 | 0.546 | 1.178 | 0.359 | 1.089  | 0.918 | 1.310 | 0.101 |
| 1384518_at   | BE107536 | similar to PHD finger protein 14 isoform 1 (predicted)                                                                                                | RGD1563764_predicted | 0.500 | 0.297 | 0.727 | 0.180 | 0.442  | 0.157 | 0.708 | 0.113 |
| 1393458_s_at | BE107536 | similar to PHD finger protein 14 isoform 1 (predicted)                                                                                                | RGD1563764_predicted | 0.846 | 0.753 | 0.787 | 0.031 | 0.689  | 0.280 | 0.716 | 0.020 |
| 1376043_at   | BI292073 | similar to PHD zinc finger containing protein JUNE1                                                                                                   | MGC94192             | 1.327 | 0.118 | 2.893 | 0.006 | 0.940  | 0.173 | 2.274 | 0.107 |
| 1377674_at   | AI408930 | Similar to PHF21A protein (predicted)                                                                                                                 | RGD1560612_predicted | 1.451 | 0.039 | 0.681 | 0.004 | 1.743  | 0.036 | 0.966 | 0.735 |
| 1374078_at   | BI295133 | similar to PHF21A protein (predicted)                                                                                                                 | RGD1560612_predicted | 1.042 | 0.795 | 1.398 | 0.337 | 1.503  | 0.781 | 1.535 | 0.025 |
| 1371863_at   | BM387059 | similar to phosphatidylglycerophosphate synthase (predicted)                                                                                          | RGD1305052_predicted | 3.422 | 0.008 | 5.272 | 0.001 | 2.846  | 0.001 | 2.595 | 0.002 |
| 1398557_at   | BF389362 | Similar to phosphoseryl-tRNA kinase (predicted)                                                                                                       | RGD1564300_predicted | 1.213 | 0.029 | 1.498 | 0.033 | 0.835  | 0.463 | 1.933 | 0.027 |
| 1373731_at   | AI409901 | similar to phosphoseryl-tRNA kinase (predicted)                                                                                                       | RGD1564300_predicted | 0.677 | 0.271 | 1.848 | 0.012 | 0.542  | 0.229 | 1.520 | 0.044 |
| 1390779_at   | AA818912 | Similar to phosphoseryl-tRNA kinase (predicted)                                                                                                       | RGD1564300_predicted | 0.831 | 0.510 | 0.881 | 0.274 | 1.056  | 0.924 | 0.916 | 0.274 |
| 1392038_at   | BF387389 | similar to PI-3-kinase-related kinase SMG-1 isoform 2 (predicted)                                                                                     | RGD1563508_predicted | 2.173 | 0.014 | 5.263 | 0.003 | 1.979  | 0.079 | 2.679 | 0.001 |
| 1397709_at   | BG672259 | similar to PI-3-kinase-related kinase SMG-1 isoform 2 (predicted)                                                                                     | RGD1563508_predicted | 1.302 | 0.014 | 1.109 | 0.109 | 1.585  | 0.051 | 1.042 | 0.986 |
| 1372830_at   | BM384116 | similar to PI-3-kinase-related kinase SMG-1 isoform 2 (predicted)                                                                                     | RGD1563508_predicted | 1.357 | 0.198 | 1.289 | 0.004 | 1.361  | 0.118 | 1.375 | 0.006 |
| 1374111_at   | BI301101 | similar to pinin                                                                                                                                      | LOC368070            | 1.311 | 0.017 | 1.135 | 0.153 | 2.422  | 0.003 | 1.414 | 0.026 |

|            |          |                                                                                                                                                     |                                                  |       |       |       |       |       |       |       |       |
|------------|----------|-----------------------------------------------------------------------------------------------------------------------------------------------------|--------------------------------------------------|-------|-------|-------|-------|-------|-------|-------|-------|
| 1380001_at | AW526140 | similar to pinin                                                                                                                                    | LOC368070                                        | 1.648 | 0.040 | 1.096 | 0.972 | 3.007 | 0.014 | 1.407 | 0.667 |
| 1396463_at | BE127046 | similar to pinin                                                                                                                                    | LOC368070                                        | 1.080 | 0.279 | 1.132 | 0.368 | 1.851 | 0.098 | 0.963 | 0.778 |
| 1383336_at | BF549763 | similar to pinin                                                                                                                                    | LOC368070                                        | 1.128 | 0.847 | 1.165 | 0.495 | 2.385 | 0.006 | 1.383 | 0.054 |
| 1376762_at | BE112933 | Similar to Pleckstrin homology domain-containing protein family A member 1 (Tandem PH domain containing protein-1) (predicted)                      | RGD1564153_predicted                             | 1.524 | 0.075 | 2.268 | 0.025 | 0.989 | 0.815 | 2.823 | 0.034 |
| 1392230_at | BI287470 | Similar to Pleckstrin homology domain-containing protein family A member 1 (Tandem PH domain containing protein-1) (predicted)                      | RGD1564153_predicted                             | 1.362 | 0.739 | 1.105 | 0.972 | 2.315 | 0.184 | 1.649 | 0.257 |
| 1378094_at | BM389654 | Similar to pleckstrin homology-like domain, family B, member 2                                                                                      | LOC360713                                        | 0.395 | 0.004 | 0.243 | 0.000 | 0.472 | 0.003 | 0.308 | 0.012 |
| 1377022_at | BF395328 | similar to pleckstrin homology-like domain, family B, member 2                                                                                      | LOC360713                                        | 0.532 | 0.054 | 1.762 | 0.191 | 0.802 | 0.376 | 1.965 | 0.014 |
| 1381796_at | AI454286 | Similar to PLU1 (predicted)                                                                                                                         | RGD1565602_predicted                             | 0.884 | 0.586 | 1.072 | 0.957 | 0.991 | 0.479 | 1.514 | 0.147 |
| 1383082_at | BF522592 | similar to PLU1 (predicted)                                                                                                                         | RGD1565602_predicted                             | 1.008 | 0.614 | 1.044 | 0.675 | 0.995 | 0.985 | 1.001 | 0.991 |
| 1376347_at | BM383996 | similar to PLU1 (predicted)                                                                                                                         | RGD1565602_predicted                             | 0.988 | 0.685 | 1.231 | 0.124 | 0.998 | 0.933 | 0.969 | 0.307 |
| 1382152_at | AI234336 | similar to PLU1 (predicted)                                                                                                                         | RGD1565602_predicted                             | 0.913 | 0.848 | 0.966 | 0.828 | 0.994 | 0.787 | 1.009 | 0.948 |
| 1377863_at | BI303977 | similar to PLU1 (predicted)                                                                                                                         | RGD1565602_predicted                             | 0.978 | 0.947 | 0.585 | 0.025 | 0.704 | 0.159 | 0.833 | 0.060 |
| 1388852_at | AI406307 | similar to pM5 protein; DNA segment, Chr 7, ERATO Doi 156, expressed (predicted)                                                                    | RGD1305240_predicted                             | 0.516 | 0.045 | 0.576 | 0.008 | 0.618 | 0.009 | 0.636 | 0.090 |
| 1374385_at | AI009789 | similar to Pol(yrC)-binding protein 1 (Alpha-CP1) (hnRNP-E1) (predicted)                                                                            | RGD1561319_predicted                             | 0.968 | 0.957 | 2.192 | 0.001 | 1.026 | 0.810 | 1.758 | 0.000 |
| 1376056_at | BF291214 | similar to poly (ADP-ribose) polymerase family, member 10 (predicted)                                                                               | RGD1563511_predicted                             | 3.548 | 0.075 | 1.364 | 0.707 | 2.794 | 0.007 | 1.503 | 0.047 |
| 1377970_at | BE105494 | similar to poly (ADP-ribose) polymerase family, member 8                                                                                            | LOC294762                                        | 6.906 | 0.000 | 3.377 | 0.000 | 6.385 | 0.001 | 3.319 | 0.002 |
| 1373013_at | AI009693 | similar to polyadenylate-binding protein-interacting protein 2                                                                                      | LOC361309                                        | 1.034 | 0.201 | 1.249 | 0.063 | 1.097 | 0.373 | 1.182 | 0.057 |
| 1399026_at | AI178191 | similar to polyadenylate-binding protein-interacting protein 2                                                                                      | LOC361309                                        | 0.757 | 0.959 | 0.889 | 0.544 | 0.918 | 0.236 | 0.731 | 0.099 |
| 1392054_at | AW532414 | similar to polybromo-1 (predicted)                                                                                                                  | RGD1565549_predicted                             | 1.319 | 0.132 | 0.958 | 0.530 | 1.211 | 0.318 | 0.939 | 0.413 |
| 1395100_at | BI286690 | similar to polybromo-1 (predicted)                                                                                                                  | RGD1565549_predicted                             | 1.961 | 0.158 | 1.017 | 0.910 | 1.779 | 0.036 | 0.997 | 0.991 |
| 1379645_at | BE113614 | similar to polybromo-1 (predicted)                                                                                                                  | RGD1565549_predicted                             | 1.018 | 0.629 | 0.589 | 0.057 | 1.261 | 0.622 | 0.568 | 0.007 |
| 1382021_at | AA850650 | Similar to polycystic kidney disease 2 (predicted)                                                                                                  | RGD1559992_predicted                             | 0.704 | 0.411 | 0.443 | 0.000 | 0.673 | 0.322 | 0.470 | 0.010 |
| 1378522_at | BG373062 | Similar to polycystic kidney disease 2 (predicted)                                                                                                  | RGD1559992_predicted                             | 0.820 | 0.533 | 1.040 | 0.298 | 0.889 | 0.517 | 0.839 | 0.197 |
| 1376374_at | AI406775 | Similar to polycystic kidney disease 2 (predicted)                                                                                                  | RGD1559992_predicted                             | 0.955 | 0.883 | 0.678 | 0.008 | 0.786 | 0.477 | 0.663 | 0.007 |
| 1398508_at | BF546374 | similar to polyglutamine-containing protein                                                                                                         | RGD1310994                                       | 1.011 | 0.798 | 0.742 | 0.125 | 0.947 | 0.742 | 0.819 | 0.366 |
| 1393205_at | AA997182 | Similar to polymerase (RNA) II (DNA directed) polypeptide H (predicted)                                                                             | RGD1561203_predicted                             | 1.529 | 0.597 | 1.363 | 0.021 | 0.657 | 0.154 | 1.089 | 0.950 |
| 1372363_at | BF404414 | similar to polymerase (RNA) II (DNA directed) polypeptide H (predicted) /// similar to polymerase (RNA) II (DNA directed) polypeptide H (predicted) | RGD1565904_predicted ///<br>RGD1561203_predicted | 1.092 | 0.553 | 1.115 | 0.277 | 0.760 | 0.238 | 0.973 | 0.355 |
| 1389247_at | BI274108 | similar to polymerase (RNA) III (DNA directed) (155kD)                                                                                              | RGD1305574                                       | 0.726 | 0.304 | 1.255 | 0.727 | 0.943 | 0.457 | 0.880 | 0.789 |
| 1375896_at | BM392055 | similar to polyploidy associated protein kinase PAK-A (predicted)                                                                                   | RGD1559449_predicted                             | 0.795 | 0.745 | 0.547 | 0.029 | 1.608 | 0.109 | 0.606 | 0.009 |
| 1384523_at | BF400964 | similar to postmeiotic segregation increased 1                                                                                                      | MGC72584                                         | 1.091 | 0.731 | 1.357 | 0.050 | 0.981 | 0.879 | 1.299 | 0.041 |
| 1399134_at | AW144008 | similar to POT1-like telomere end-binding protein                                                                                                   | LOC500054                                        | 0.656 | 0.062 | 0.711 | 0.006 | 0.562 | 0.234 | 0.504 | 0.003 |
| 1389988_at | BI301226 | similar to Potassium channel tetramerisation domain containing protein 2 (predicted)                                                                | RGD1566063_predicted                             | 0.577 | 0.077 | 1.000 | 0.995 | 0.635 | 0.192 | 1.003 | 0.918 |
| 1384002_at | BG663077 | similar to Potential phospholipid-transporting ATPase IF (ATPase class I type 11B) (ATPase IR)                                                      | LOC361929                                        | 0.658 | 0.231 | 0.343 | 0.003 | 0.823 | 0.457 | 0.558 | 0.005 |
| 1370925_at | BG380816 | similar to Potential phospholipid-transporting ATPase IIB                                                                                           | LOC291411                                        | 0.580 | 0.311 | 0.470 | 0.002 | 0.473 | 0.002 | 0.446 | 0.020 |
| 1399000_at | AI233289 | Similar to Potential phospholipid-transporting ATPase IIB                                                                                           | LOC291411                                        | 0.791 | 0.943 | 1.231 | 0.636 | 1.092 | 0.690 | 1.001 | 0.997 |
| 1393502_at | AI071962 | similar to predicted CDS, putative protein of bilateral origin (4J193)                                                                              | RGD1306153                                       | 0.816 | 0.110 | 1.401 | 0.006 | 0.853 | 0.910 | 1.108 | 0.033 |
| 1367495_at | AI412457 | similar to prefoldin 4 (predicted)                                                                                                                  | RGD1560211_predicted                             | 0.725 | 0.097 | 1.580 | 0.042 | 0.580 | 0.006 | 1.656 | 0.224 |
| 1388475_at | AA899150 | Similar to prion protein interacting protein 1                                                                                                      | LOC313535                                        | 0.848 | 0.088 | 0.847 | 0.070 | 0.896 | 0.409 | 0.849 | 0.052 |
| 1374082_at | BI275982 | similar to PRO1853 homolog                                                                                                                          | RGD1311578                                       | 0.857 | 0.382 | 1.251 | 0.194 | 0.556 | 0.017 | 1.311 | 0.021 |
| 1395318_at | BF397354 | similar to Probable chromodomain-helicase-DNA-binding protein KIAA1416                                                                              | LOC307727                                        | 1.009 | 0.935 | 0.959 | 0.833 | 0.993 | 0.949 | 0.961 | 0.538 |
| 1374129_at | AI104518 | similar to product is unknown-seizure-related gene (predicted)                                                                                      | RGD1562933_predicted                             | 0.936 | 0.260 | 0.942 | 0.079 | 1.059 | 0.638 | 0.757 | 0.051 |
| 1397320_at | BI293372 | Similar to Progesterone-induced blocking factor 1 (predicted)                                                                                       | RGD1305077_predicted                             | 0.660 | 0.239 | 2.742 | 0.005 | 0.992 | 0.747 | 1.709 | 0.127 |
| 1389325_at | AA848545 | similar to programmed cell death 10                                                                                                                 | MGC72992                                         | 1.744 | 0.107 | 1.948 | 0.019 | 1.855 | 0.057 | 2.033 | 0.002 |
| 1389852_at | AI598316 | similar to proliferation associated nuclear element 1 isoform 1 (predicted)                                                                         | RGD1307309_predicted                             | 0.783 | 0.979 | 1.099 | 0.212 | 1.030 | 0.896 | 1.101 | 0.755 |
| 1389447_at | AA955470 | similar to prolyl-4-hydroxylase-alpha NE2 CG9720-PA (predicted)                                                                                     | RGD1311848_predicted                             | 0.521 | 0.514 | 0.953 | 0.922 | 0.612 | 0.175 | 0.864 | 0.329 |
| 1372643_at | BE110569 | similar to protein 4.1G (predicted)                                                                                                                 | RGD1563977_predicted                             | 0.431 | 0.023 | 0.512 | 0.052 | 0.452 | 0.015 | 0.410 | 0.011 |
| 1390957_at | AI112360 | Similar to Protein C14orf101 homolog (predicted)                                                                                                    | RGD1562018_predicted                             | 0.820 | 0.426 | 0.625 | 0.015 | 0.610 | 0.195 | 0.842 | 0.141 |
| 1382855_at | BI295963 | similar to Protein C20orf158 (predicted)                                                                                                            | RGD1305899_predicted                             | 1.019 | 0.392 | 0.876 | 0.079 | 0.859 | 0.304 | 0.706 | 0.054 |
| 1375667_at | AW434286 | Similar to Protein C20orf177 (predicted)                                                                                                            | RGD1311952_predicted                             | 0.478 | 0.099 | 0.128 | 0.014 | 0.244 | 0.056 | 0.087 | 0.003 |
| 1393046_at | AI709474 | similar to Protein C20orf20                                                                                                                         | RGD1308612                                       | 0.901 | 0.521 | 1.525 | 0.013 | 0.940 | 0.697 | 1.107 | 0.073 |
| 1389594_at | BI284608 | similar to Protein C20orf22 homolog                                                                                                                 | LOC499913                                        | 0.451 | 0.440 | 0.712 | 0.188 | 0.435 | 0.067 | 0.463 | 0.099 |
| 1392576_at | AI175445 | similar to protein C33A12.3                                                                                                                         | RGD1359508                                       | 0.558 | 0.883 | 0.878 | 0.354 | 0.997 | 0.987 | 0.847 | 0.611 |
| 1380553_at | BM390497 | similar to Protein C8orf1 (hT41) (predicted)                                                                                                        | RGD1306323_predicted                             | 1.779 | 0.207 | 1.602 | 0.067 | 1.758 | 0.302 | 1.026 | 0.464 |
| 1391881_at | AI716506 | Similar to Protein C9orf10 (predicted)                                                                                                              | RGD1306643_predicted                             | 1.323 | 0.187 | 1.038 | 0.791 | 0.737 | 0.234 | 1.207 | 0.410 |
| 1371386_at | AI407975 | similar to Protein C9orf10 (predicted)                                                                                                              | RGD1306643_predicted                             | 0.787 | 0.428 | 0.869 | 0.057 | 0.747 | 0.039 | 0.828 | 0.053 |
| 1372028_at | AA893215 | similar to Protein CGI-117 (Protein HSPC111) (predicted)                                                                                            | RGD1305727_predicted                             | 0.723 | 0.338 | 1.547 | 0.015 | 1.007 | 0.523 | 1.596 | 0.022 |
| 1389980_at | AI412591 | similar to Protein HSPC163 (predicted)                                                                                                              | RGD1559740_predicted                             | 1.715 | 0.044 | 2.725 | 0.001 | 1.466 | 0.101 | 2.241 | 0.002 |
| 1398458_at | BE104506 | similar to protein kinase, lysine deficient 1; kinase deficient protein (predicted)                                                                 | RGD1307284_predicted                             | 0.399 | 0.067 | 0.403 | 0.003 | 0.342 | 0.022 | 0.456 | 0.003 |

|            |           |                                                                                                                                                                                                                                      |                         |       |       |       |       |        |       |       |       |
|------------|-----------|--------------------------------------------------------------------------------------------------------------------------------------------------------------------------------------------------------------------------------------|-------------------------|-------|-------|-------|-------|--------|-------|-------|-------|
| 1388949_at | BI297693  | Similar to protein of unknown function (predicted)                                                                                                                                                                                   | RGD1566243_predicted    | 0.869 | 0.993 | 1.191 | 0.465 | 1.004  | 0.991 | 1.084 | 0.503 |
| 1377359_at | BM384440  | similar to protein P3                                                                                                                                                                                                                | LOC501665               | 0.247 | 0.105 | 0.513 | 0.178 | 0.368  | 0.075 | 0.649 | 0.285 |
| 1393890_at | BG670819  | similar to protein phosphatase 1, regulatory (inhibitor) subunit 1C (predicted)                                                                                                                                                      | RGD1562095_predicted    | 0.770 | 0.746 | 0.965 | 0.375 | 1.315  | 0.229 | 0.743 | 0.319 |
| 1397786_at | BF391927  | Similar to protein phosphatase 1, regulatory subunit 12C                                                                                                                                                                             | LOC499076               | 1.722 | 0.230 | 0.828 | 0.639 | 2.859  | 0.059 | 1.236 | 0.699 |
| 1372625_at | AA851663  | similar to protein phosphatase 1, regulatory subunit 12C                                                                                                                                                                             | LOC499076               | 0.981 | 0.739 | 0.933 | 0.155 | 1.524  | 0.075 | 0.982 | 0.993 |
| 1393261_at | AI058850  | Similar to protein phosphatase 2A B56 regulatory subunit gamma 3 isoform (predicted)                                                                                                                                                 | RGD1564600_predicted    | 0.550 | 0.175 | 0.309 | 0.002 | 0.643  | 0.262 | 0.306 | 0.003 |
| 1392498_at | BG670494  | similar to protein phosphatase 2A B56 regulatory subunit gamma 3 isoform (predicted)                                                                                                                                                 | RGD1564600_predicted    | 0.437 | 0.470 | 0.612 | 0.188 | 0.368  | 0.034 | 0.673 | 0.010 |
| 1374812_at | AA818197  | similar to protein Tyr phosphatase                                                                                                                                                                                                   | LOC498331               | 1.020 | 0.860 | 0.972 | 0.909 | 1.307  | 0.433 | 0.995 | 0.986 |
| 1395437_at | BF287018  | Similar to protein Tyr phosphatase                                                                                                                                                                                                   | LOC498331               | 1.202 | 0.889 | 0.736 | 0.085 | 1.391  | 0.139 | 0.960 | 0.406 |
| 1371086_at | BE096879  | similar to protein tyrosine phosphatase, receptor type, F (predicted)                                                                                                                                                                | RGD1564047_predicted    | 1.135 | 0.838 | 1.730 | 0.452 | 1.002  | 0.993 | 1.928 | 0.094 |
| 1382200_at | AW917547  | similar to Prr6 protein (predicted)                                                                                                                                                                                                  | RGD1565681_predicted    | 0.368 | 0.135 | 0.474 | 0.005 | 0.671  | 0.105 | 0.540 | 0.011 |
| 1395399_at | BM387829  | similar to PS1D protein (predicted)                                                                                                                                                                                                  | RGD1565267_predicted    | 0.659 | 0.981 | 0.956 | 0.965 | 0.948  | 0.567 | 0.825 | 0.496 |
| 1376315_at | BI282297  | similar to putative alpha-mannosidase                                                                                                                                                                                                | RGD1303074              | 0.483 | 0.163 | 0.409 | 0.007 | 0.604  | 0.000 | 0.327 | 0.007 |
| 1389450_at | BF392737  | similar to Putative methyltransferase HUSSY-03 (Williams-Beuren syndrome chromosome region 22 protein homolog) ///<br>similar to Putative methyltransferase HUSSY-03 (Williams-Beuren syndrome chromosome region 22 protein homolog) | LOC360830 /// LOC368084 | 0.581 | 0.158 | 1.273 | 0.097 | 0.932  | 0.627 | 1.049 | 0.191 |
| 1373563_at | H35156    | similar to putative nucleic acid binding protein RY-1; EST AI449063 (predicted)                                                                                                                                                      | RGD1310925_predicted    | 0.972 | 0.339 | 1.297 | 0.125 | 0.900  | 0.225 | 1.175 | 0.012 |
| 1377309_at | AA963085  | Similar to putative pheromone receptor                                                                                                                                                                                               | LOC503293               | 1.116 | 0.924 | 1.100 | 0.143 | 1.292  | 0.275 | 1.242 | 0.596 |
| 1396892_at | AI548369  | Similar to putative pheromone receptor (predicted)                                                                                                                                                                                   | RGD1563755_predicted    | 1.530 | 0.493 | 1.492 | 0.610 | 0.795  | 0.449 | 1.376 | 0.425 |
| 1378741_at | AA850260  | similar to putative phosphatase subunit                                                                                                                                                                                              | RGD1309207              | 1.457 | 0.569 | 1.777 | 0.040 | 1.342  | 0.487 | 1.196 | 0.082 |
| 1373627_at | BI289104  | Similar to putative phosphoinositide 5-phosphatase type II; C62                                                                                                                                                                      | LOC287533               | 0.875 | 0.946 | 0.950 | 0.687 | 1.006  | 0.984 | 1.056 | 0.238 |
| 1376328_at | BI278776  | similar to putative protein (5S487) (predicted)                                                                                                                                                                                      | RGD1310819_predicted    | 0.715 | 0.166 | 3.383 | 0.001 | 0.836  | 0.351 | 0.865 | 0.601 |
| 1379360_at | AI013789  | similar to Putative protein 15E1.2 (predicted)                                                                                                                                                                                       | RGD1309698_predicted    | 0.703 | 0.325 | 1.003 | 0.668 | 0.720  | 0.332 | 0.867 | 0.155 |
| 1382866_at | BI285368  | similar to Putative protein 15E1.2 (predicted)                                                                                                                                                                                       | RGD1309698_predicted    | 1.002 | 0.687 | 0.651 | 0.016 | 0.744  | 0.604 | 1.092 | 0.535 |
| 1393653_at | BM384831  | similar to putative protein product of HMFN2073 (predicted)                                                                                                                                                                          | RGD1560766_predicted    | 1.530 | 0.204 | 0.995 | 0.961 | 1.017  | 0.977 | 1.000 | 0.992 |
| 1376502_at | AW523504  | similar to putative protein, with at least 9 transmembrane domains, of eukaryotic origin (43.9 kD) (2G415)                                                                                                                           | RGD1309228              | 1.176 | 0.053 | 1.094 | 0.206 | 1.025  | 0.246 | 1.153 | 0.853 |
| 1395537_at | BF523835  | similar to putative protein, with at least 9 transmembrane domains, of eukaryotic origin (43.9 kD) (2G415)                                                                                                                           | RGD1309228              | 1.190 | 0.506 | 1.730 | 0.020 | 1.117  | 0.258 | 1.300 | 0.530 |
| 1378445_at | BM388759  | similar to putative repair and recombination helicase RAD26L (predicted)                                                                                                                                                             | RGD1561537_predicted    | 0.708 | 0.112 | 0.844 | 0.298 | 0.807  | 0.584 | 0.926 | 0.229 |
| 1374170_at | AI172069  | similar to putative TRAF and TNF receptor associated protein                                                                                                                                                                         | LOC498749               | 0.822 | 0.307 | 1.159 | 0.203 | 1.499  | 0.303 | 1.116 | 0.408 |
| 1371620_at | BI279855  | similar to px19-like protein                                                                                                                                                                                                         | RGD1308082              | 0.703 | 0.207 | 1.310 | 0.006 | 0.611  | 0.038 | 1.211 | 0.117 |
| 1382028_at | BE115406  | similar to PxF protein                                                                                                                                                                                                               | LOC289233               | 1.000 | 0.915 | 0.686 | 0.009 | 1.055  | 0.124 | 0.734 | 0.002 |
| 1376710_at | BE113252  | Similar to PYM protein                                                                                                                                                                                                               | LOC503354               | 1.263 | 0.682 | 1.009 | 0.078 | 1.952  | 0.098 | 1.267 | 0.132 |
| 1369931_at | NM_053297 | similar to pyruvate kinase (EC 2.7.1.40) isozyme M2 - rat (predicted)                                                                                                                                                                | RGD1561681_predicted    | 0.812 | 0.194 | 0.834 | 0.039 | 0.746  | 0.044 | 0.681 | 0.003 |
| 1398909_at | AA849634  | similar to QIL1                                                                                                                                                                                                                      | LOC301124               | 0.710 | 0.634 | 0.578 | 0.045 | 0.568  | 0.031 | 0.561 | 0.058 |
| 1375378_at | BE108882  | similar to QUAKING isoform 6                                                                                                                                                                                                         | LOC499022               | 1.448 | 0.014 | 1.478 | 0.028 | 1.436  | 0.040 | 1.654 | 0.011 |
| 1384016_at | AI044937  | similar to R31449_3 (predicted)                                                                                                                                                                                                      | RGD1563634_predicted    | 1.005 | 0.976 | 1.337 | 0.057 | 0.804  | 0.991 | 1.939 | 0.005 |
| 1391955_at | BI291339  | similar to RAB19, member RAS oncogene family                                                                                                                                                                                         | LOC500088               | 1.006 | 0.061 | 1.327 | 0.006 | 1.456  | 0.039 | 1.222 | 0.001 |
| 1383264_at | BI294715  | Similar to RAB3 GTPase-activating protein (predicted)                                                                                                                                                                                | RGD1306487_predicted    | 0.866 | 0.040 | 0.945 | 0.166 | 0.951  | 0.081 | 0.916 | 0.199 |
| 1391897_at | BG379295  | similar to rab6 GTPase activating protein (GAP and centrosome-associated) (predicted)                                                                                                                                                | RGD1304620_predicted    | 3.734 | 0.040 | 1.068 | 0.971 | 4.792  | 0.001 | 1.587 | 0.043 |
| 1396817_at | AI599545  | Similar to RAD54B homolog isoform 1; RAD54, S. cerevisiae, homolog of, B (predicted)                                                                                                                                                 | RGD1306507_predicted    | 0.694 | 0.454 | 0.339 | 0.016 | 0.587  | 0.470 | 0.346 | 0.015 |
| 1385221_at | BE099682  | Similar to RAD54B homolog isoform 1; RAD54, S. cerevisiae, homolog of, B (predicted)                                                                                                                                                 | RGD1306507_predicted    | 1.070 | 0.913 | 0.538 | 0.196 | 0.745  | 0.197 | 0.460 | 0.042 |
| 1396801_at | AI764598  | Similar to Ran-binding protein 2 (predicted)                                                                                                                                                                                         | RGD1560047_predicted    | 1.890 | 0.114 | 0.839 | 0.274 | 1.246  | 0.296 | 1.346 | 0.458 |
| 1383172_at | BF543886  | similar to Ran-binding protein 2 (predicted)                                                                                                                                                                                         | RGD1560047_predicted    | 0.865 | 0.420 | 0.746 | 0.320 | 1.099  | 0.059 | 0.905 | 0.868 |
| 1375371_at | BI296662  | similar to Ran-binding protein 2 (predicted)                                                                                                                                                                                         | RGD1560047_predicted    | 1.039 | 0.892 | 1.374 | 0.110 | 0.944  | 0.807 | 1.123 | 0.804 |
| 1388477_at | AI598440  | similar to RAN-binding protein 3 (RanBP3)                                                                                                                                                                                            | LOC501281               | 0.726 | 0.189 | 0.993 | 0.821 | 0.764  | 0.138 | 0.905 | 0.490 |
| 1371752_at | AI105088  | similar to Ran-interacting protein MOG1 (predicted)                                                                                                                                                                                  | RGD1563195_predicted    | 0.845 | 0.510 | 1.163 | 0.293 | 1.247  | 0.306 | 1.070 | 0.102 |
| 1395264_at | BF543757  | similar to Rap1-interacting factor 1 (predicted)                                                                                                                                                                                     | RGD1562474_predicted    | 0.610 | 0.038 | 0.912 | 0.405 | 0.719  | 0.062 | 0.944 | 0.223 |
| 1382384_at | BM383783  | similar to Ras association (RalGDS/AF-6) domain family 6                                                                                                                                                                             | MGC114410               | 0.696 | 0.033 | 1.252 | 0.157 | 0.426  | 0.005 | 0.972 | 0.563 |
| 1373036_at | BF283621  | similar to Ras GTPase-activating-like protein IQGAP2 (predicted)                                                                                                                                                                     | RGD1561455_predicted    | 0.842 | 0.643 | 1.011 | 0.969 | 0.863  | 0.708 | 1.010 | 0.973 |
| 1374165_at | AA818264  | similar to Rasa4 protein (predicted)                                                                                                                                                                                                 | RGD1565457_predicted    | 5.067 | 0.005 | 4.171 | 0.000 | 12.611 | 0.000 | 6.171 | 0.000 |
| 1398982_at | AI178239  | similar to Ras-related protein Rab-1B                                                                                                                                                                                                | MGC105830               | 0.515 | 0.908 | 0.710 | 0.016 | 0.427  | 0.963 | 0.714 | 0.068 |
| 1384937_at | AI715121  | Similar to RB-associated KRAB repressor (predicted)                                                                                                                                                                                  | RGD1562875_predicted    | 0.826 | 0.040 | 1.232 | 0.953 | 0.326  | 0.003 | 1.117 | 0.662 |
| 1377787_at | BF407266  | similar to Rbm6 protein (predicted)                                                                                                                                                                                                  | RGD1560367_predicted    | 1.223 | 0.186 | 1.113 | 0.141 | 1.013  | 0.941 | 1.127 | 0.137 |
| 1389868_at | AA850780  | similar to RCK (predicted)                                                                                                                                                                                                           | RGD1564560_predicted    | 0.661 | 0.162 | 0.835 | 0.228 | 0.727  | 0.126 | 0.737 | 0.005 |
| 1392854_at | BE116127  | similar to RCK (predicted)                                                                                                                                                                                                           | RGD1564560_predicted    | 0.622 | 0.625 | 0.492 | 0.164 | 0.457  | 0.104 | 0.500 | 0.197 |
| 1385168_at | BM387883  | similar to receptor-interacting factor 1                                                                                                                                                                                             | RGD1306520              | 1.302 | 0.157 | 0.767 | 0.934 | 1.887  | 0.055 | 1.515 | 0.131 |
| 1396870_at | BF419761  | Similar to regulator of G-protein signaling Z1                                                                                                                                                                                       | LOC362477               | 0.652 | 0.240 | 1.268 | 0.928 | 0.573  | 0.010 | 0.808 | 0.531 |
| 1396547_at | BI299163  | Similar to regulator of G-protein signaling Z1                                                                                                                                                                                       | LOC362477               | 1.061 | 0.906 | 0.858 | 0.471 | 1.000  | 0.705 | 1.016 | 0.652 |
| 1382362_at | AA997890  | Similar to regulator of sex-limitation candidate 16 (predicted)                                                                                                                                                                      | RGD1566325_predicted    | 0.514 | 0.001 | 0.483 | 0.005 | 0.759  | 0.000 | 0.564 | 0.004 |
| 1393378_at | BM388654  | Similar to regulator of sex-limitation candidate 16 (predicted)                                                                                                                                                                      | RGD1566325_predicted    | 1.071 | 0.261 | 0.543 | 0.032 | 0.978  | 0.908 | 0.574 | 0.002 |
| 1381481_at | AI028912  | Similar to regulator of sex-limitation candidate 16 (predicted)                                                                                                                                                                      | RGD1566325_predicted    | 1.452 | 0.287 | 1.456 | 0.229 | 1.062  | 0.952 | 0.886 | 0.888 |

|              |           |                                                                                                                                                               |                                          |        |       |       |       |        |       |       |       |
|--------------|-----------|---------------------------------------------------------------------------------------------------------------------------------------------------------------|------------------------------------------|--------|-------|-------|-------|--------|-------|-------|-------|
| 1393262_at   | BG379771  | Similar to regulatory factor X-associated protein                                                                                                             | LOC499617                                | 0.557  | 0.038 | 0.175 | 0.008 | 0.203  | 0.058 | 0.191 | 0.006 |
| 1395445_at   | AI548975  | similar to regulatory factor X-associated protein                                                                                                             | LOC499617                                | 1.484  | 0.302 | 1.267 | 0.193 | 0.874  | 0.616 | 0.664 | 0.533 |
| 1373382_at   | AI408771  | similar to RERI homolog                                                                                                                                       | RGD1306324                               | 0.763  | 0.498 | 1.114 | 0.727 | 0.585  | 0.025 | 1.197 | 0.365 |
| 1381754_at   | BE116951  | similar to retinitis pigmentosa GTPase regulator-like protein (predicted)                                                                                     | RGD1563024_predicted                     | 0.796  | 0.528 | 1.571 | 0.105 | 1.333  | 0.784 | 1.470 | 0.066 |
| 1392543_at   | BI293462  | similar to retinoblastoma binding protein 4 (predicted) /// retinoblastoma binding protein 4 (predicted)                                                      | RGD1563620_predicted /// Rbbp4_predicted | 0.760  | 0.069 | 0.884 | 0.130 | 0.791  | 0.047 | 0.859 | 0.204 |
| 1376299_at   | BI298889  | similar to Retinoblastoma-binding protein 2 (RBBP-2)                                                                                                          | LOC312678                                | 0.662  | 0.321 | 1.234 | 0.469 | 0.663  | 0.003 | 0.997 | 0.296 |
| 1391689_at   | BI282883  | similar to Retinoblastoma-binding protein 2 (RBBP-2)                                                                                                          | LOC312678                                | 0.953  | 0.621 | 1.124 | 0.296 | 0.902  | 0.373 | 0.907 | 0.527 |
| 1379618_at   | AI172526  | Similar to Retinoblastoma-binding protein 8 (RBBP-8) (CtBP interacting protein) (CtIP) (Retinoblastoma-interacting protein and myosin-like) (RIM) (predicted) | RGD1308872_predicted                     | 1.019  | 0.200 | 1.200 | 0.253 | 1.275  | 0.086 | 1.031 | 0.833 |
| 1391040_at   | AA997052  | similar to Retinoblastoma-binding protein 8 (RBBP-8) (CtBP interacting protein) (CtIP) (Retinoblastoma-interacting protein and myosin-like) (RIM) (predicted) | RGD1308872_predicted                     | 1.151  | 0.309 | 1.009 | 0.874 | 1.427  | 0.038 | 1.142 | 0.062 |
| 1398995_at   | BM389233  | similar to retinoid x receptor interacting protein                                                                                                            | RGD1307009                               | 1.713  | 0.153 | 1.425 | 0.008 | 1.717  | 0.049 | 1.000 | 0.342 |
| 1379239_at   | AI705987  | Similar to retinoid x receptor interacting protein                                                                                                            | RGD1307009                               | 1.086  | 0.506 | 1.194 | 0.639 | 1.582  | 0.103 | 0.891 | 0.276 |
| 1391908_at   | AW919097  | Similar to retinoid x receptor interacting protein                                                                                                            | RGD1307009                               | 1.423  | 0.665 | 0.817 | 0.660 | 1.244  | 0.651 | 0.931 | 0.486 |
| 1382689_at   | BI276519  | similar to RGD1310870_predicted protein                                                                                                                       | LOC499242                                | 0.546  | 0.116 | 1.309 | 0.456 | 0.563  | 0.004 | 1.074 | 0.141 |
| 1374708_at   | BF408594  | similar to Rho guanine nucleotide exchange factor (GEF) 10 (predicted)                                                                                        | RGD1565043_predicted                     | 0.999  | 0.993 | 0.788 | 0.348 | 1.007  | 0.967 | 0.646 | 0.263 |
| 1398361_at   | BI295127  | similar to Rho-GTPase-activating protein PS-GAP-a (predicted)                                                                                                 | RGD1562938_predicted                     | 1.003  | 0.356 | 1.001 | 0.961 | 0.999  | 0.990 | 0.999 | 0.991 |
| 1395449_at   | BG673211  | Similar to ribosomal protein L24-like; 60S ribosomal protein L30 isolog; my024 protein; homolog of yeast ribosomal like protein 24                            | RGD1309784                               | 0.959  | 0.584 | 1.099 | 0.735 | 0.953  | 0.497 | 1.112 | 0.139 |
| 1374957_at   | AI408197  | similar to ribosomal protein L27a (predicted)                                                                                                                 | RGD1560633_predicted                     | 0.414  | 0.003 | 0.204 | 0.000 | 0.391  | 0.051 | 0.283 | 0.000 |
| 1393096_at   | BF393086  | similar to ribosomal protein L27a (predicted)                                                                                                                 | RGD1560633_predicted                     | 0.672  | 0.008 | 0.586 | 0.000 | 0.520  | 0.002 | 0.600 | 0.008 |
| 1372043_at   | BI282363  | similar to ribosomal protein P0-like protein; 60S acidic ribosomal protein PO; ribosomal protein, large, P0-like (predicted)                                  | RGD1311709_predicted                     | 0.690  | 0.033 | 4.982 | 0.000 | 0.340  | 0.038 | 3.472 | 0.009 |
| 1398751_at   | NM_031570 | similar to ribosomal protein S7                                                                                                                               | LOC497813                                | 0.873  | 0.784 | 1.030 | 0.661 | 0.764  | 0.025 | 1.038 | 0.356 |
| 1389202_at   | AA944520  | similar to Ribulose-5-phosphate-3-epimerase                                                                                                                   | MGC124653                                | 1.504  | 0.038 | 1.500 | 0.038 | 1.840  | 0.023 | 1.586 | 0.002 |
| 1390093_at   | BF404417  | Similar to Ribulose-5-phosphate-3-epimerase                                                                                                                   | MGC124653                                | 1.783  | 0.181 | 0.837 | 0.126 | 2.502  | 0.036 | 0.962 | 0.656 |
| 1371467_at   | AA891221  | similar to RIKEN cDNA 0610007P06                                                                                                                              | LOC293103                                | 0.887  | 0.340 | 1.843 | 0.019 | 0.994  | 0.752 | 1.338 | 0.127 |
| 1373603_at   | BG673166  | similar to RIKEN cDNA 0610007P22 (predicted)                                                                                                                  | RGD1565744_predicted                     | 0.694  | 0.079 | 2.709 | 0.020 | 0.652  | 0.010 | 1.747 | 0.000 |
| 1375297_at   | AI168968  | similar to RIKEN cDNA 0610008C08 (predicted)                                                                                                                  | RGD1565289_predicted                     | 0.714  | 0.141 | 0.728 | 0.092 | 0.719  | 0.018 | 0.880 | 0.047 |
| 1371466_at   | AI177397  | similar to RIKEN cDNA 0610009B22                                                                                                                              | RGD1306925                               | 0.490  | 0.099 | 0.249 | 0.000 | 0.606  | 0.010 | 0.325 | 0.011 |
| 1393492_at   | BE107812  | Similar to RIKEN cDNA 0610009F02 (predicted)                                                                                                                  | RGD1562328_predicted                     | 1.058  | 0.241 | 0.911 | 0.276 | 1.692  | 0.042 | 1.209 | 0.113 |
| 1390421_at   | AI232524  | Similar to RIKEN cDNA 0610010D20 (predicted)                                                                                                                  | RGD1310475_predicted                     | 1.046  | 0.788 | 0.466 | 0.522 | 1.025  | 0.696 | 0.865 | 0.890 |
| 1395383_at   | BE116860  | similar to RIKEN cDNA 0610011L14 gene                                                                                                                         | RGD1311066                               | 0.864  | 0.251 | 0.758 | 0.042 | 0.770  | 0.064 | 0.910 | 0.283 |
| 1385496_at   | AI043653  | similar to RIKEN cDNA 0610011N22 gene                                                                                                                         | RGD735106                                | 0.911  | 0.109 | 0.500 | 0.076 | 0.918  | 0.111 | 0.694 | 0.140 |
| 1385102_at   | AI712625  | similar to RIKEN cDNA 0610011N22 gene                                                                                                                         | RGD735106                                | 1.273  | 0.328 | 0.965 | 0.105 | 1.234  | 0.225 | 0.645 | 0.046 |
| 1385101_a_at | AI712625  | similar to RIKEN cDNA 0610011N22 gene                                                                                                                         | RGD735106                                | 0.891  | 0.947 | 0.907 | 0.171 | 0.715  | 0.218 | 0.679 | 0.060 |
| 1398516_at   | BF283013  | similar to RIKEN cDNA 0610012C01 (predicted)                                                                                                                  | RGD1566310_predicted                     | 0.823  | 0.153 | 0.981 | 0.905 | 0.596  | 0.030 | 0.926 | 0.177 |
| 1391679_at   | AA944639  | similar to RIKEN cDNA 0610012H03                                                                                                                              | LOC499850                                | 1.152  | 0.267 | 1.249 | 0.705 | 1.011  | 0.495 | 1.239 | 0.693 |
| 1389312_at   | AI104484  | similar to RIKEN cDNA 0610016J10 gene                                                                                                                         | RGD1309929                               | 0.573  | 0.024 | 0.588 | 0.008 | 0.564  | 0.001 | 0.718 | 0.009 |
| 1376083_at   | BE112924  | Similar to RIKEN cDNA 0610016J10 gene                                                                                                                         | RGD1309929                               | 0.987  | 0.957 | 0.834 | 0.211 | 0.936  | 0.581 | 0.902 | 0.481 |
| 1393832_at   | AI136337  | similar to RIKEN cDNA 0610033I05                                                                                                                              | RGD1306676                               | 11.880 | 0.000 | 4.786 | 0.003 | 19.993 | 0.000 | 8.437 | 0.006 |
| 1381601_at   | BI293235  | Similar to RIKEN cDNA 0610037L13                                                                                                                              | RGD1559786                               | 0.899  | 0.185 | 0.984 | 0.655 | 0.948  | 0.850 | 0.967 | 0.800 |
| 1379288_at   | BM389308  | similar to RIKEN cDNA 0610037L13                                                                                                                              | RGD1559786                               | 0.720  | 0.780 | 0.885 | 0.540 | 0.838  | 0.912 | 0.651 | 0.246 |
| 1373009_at   | AI176734  | similar to RIKEN cDNA 0610037L13                                                                                                                              | RGD1559786                               | 0.945  | 0.926 | 1.120 | 0.112 | 0.884  | 0.221 | 1.435 | 0.012 |
| 1373454_at   | AI230689  | similar to RIKEN cDNA 0610037P05                                                                                                                              | RGD1305823                               | 0.881  | 0.046 | 1.392 | 0.047 | 1.056  | 0.544 | 1.081 | 0.387 |
| 1388376_at   | AI235498  | similar to RIKEN cDNA 0610038D11 (predicted)                                                                                                                  | RGD1309710_predicted                     | 1.039  | 0.856 | 1.746 | 0.035 | 0.914  | 0.074 | 1.627 | 0.025 |
|              |           |                                                                                                                                                               | RGD1560961_predicted /// Rfk ///         |        |       |       |       |        |       |       |       |
| 1382331_at   | AI180421  | similar to RIKEN cDNA 0610038L10 gene (predicted) /// riboflavin kinase /// similar to riboflavin kinase (predicted)                                          | RGD1563242_predicted                     | 0.870  | 0.932 | 0.981 | 0.248 | 0.767  | 0.175 | 0.949 | 0.637 |
| 1373334_at   | AI406609  | Similar to RIKEN cDNA 0610039G24 gene (predicted)                                                                                                             | RGD1310828_predicted                     | 0.745  | 0.026 | 0.788 | 0.109 | 0.689  | 0.276 | 1.029 | 0.776 |
| 1391387_s_at | AI072956  | Similar to RIKEN cDNA 0610039G24 gene (predicted)                                                                                                             | RGD1310828_predicted                     | 1.376  | 0.087 | 1.600 | 0.057 | 1.596  | 0.265 | 1.301 | 0.158 |
| 1395322_at   | BE116752  | Similar to RIKEN cDNA 0610039G24 gene (predicted)                                                                                                             | RGD1310828_predicted                     | 1.013  | 0.964 | 0.970 | 0.479 | 1.031  | 0.960 | 0.715 | 0.527 |
| 1389399_at   | BG372451  | similar to RIKEN cDNA 0610039J04                                                                                                                              | RGD1562218                               | 0.677  | 0.072 | 0.733 | 0.837 | 0.746  | 0.354 | 0.985 | 0.737 |
| 1398372_at   | BG380297  | similar to RIKEN cDNA 0610039K22                                                                                                                              | MGC112682                                | 0.682  | 0.204 | 0.872 | 0.119 | 0.906  | 0.992 | 0.922 | 0.076 |
| 1389054_at   | BE113616  | similar to RIKEN cDNA 0610040J01                                                                                                                              | LOC498368                                | 0.621  | 0.675 | 0.725 | 0.226 | 0.349  | 0.014 | 0.847 | 0.347 |
| 1397717_at   | BF285031  | similar to RIKEN cDNA 0610042E07                                                                                                                              | RGD1309062                               | 1.006  | 0.366 | 1.065 | 0.925 | 1.036  | 0.685 | 1.078 | 0.787 |
| 1372033_at   | BM385414  | similar to RIKEN cDNA 0610042E07                                                                                                                              | RGD1309062                               | 1.145  | 0.748 | 1.528 | 0.730 | 1.631  | 0.123 | 1.596 | 0.214 |
| 1379759_at   | BG377329  | Similar to RIKEN cDNA 0710008K08 (predicted)                                                                                                                  | RGD1562691_predicted                     | 0.988  | 0.921 | 1.220 | 0.013 | 0.994  | 0.960 | 1.193 | 0.022 |
| 1390844_at   | AI230339  | Similar to RIKEN cDNA 1110001A07 gene                                                                                                                         | RGD1307084                               | 0.930  | 0.350 | 0.435 | 0.001 | 0.915  | 0.373 | 0.555 | 0.002 |
| 1382587_at   | AA901257  | Similar to RIKEN cDNA 1110001A07 gene                                                                                                                         | RGD1307084                               | 0.733  | 0.478 | 0.779 | 0.162 | 1.052  | 0.145 | 0.900 | 0.502 |

|              |          |                                                                                   |                             |       |       |       |       |       |       |       |       |
|--------------|----------|-----------------------------------------------------------------------------------|-----------------------------|-------|-------|-------|-------|-------|-------|-------|-------|
| 1379261_at   | BE111490 | similar to RIKEN cDNA 1110001A07 gene                                             | RGD1307084                  | 1.203 | 0.529 | 0.724 | 0.021 | 0.951 | 0.660 | 0.603 | 0.020 |
| 1373371_a_at | AA892572 | similar to RIKEN cDNA 1110001J03                                                  | MGC112899                   | 0.358 | 0.301 | 0.955 | 0.644 | 0.393 | 0.099 | 0.783 | 0.669 |
| 1395898_at   | BF396228 | Similar to RIKEN cDNA 1110001M20 (predicted)                                      | RGD1310313_predicted        | 0.924 | 0.054 | 1.290 | 0.142 | 0.982 | 0.881 | 0.964 | 0.809 |
| 1399012_at   | BI285976 | similar to RIKEN cDNA 1110001M20 (predicted)                                      | RGD1310313_predicted        | 0.832 | 0.493 | 0.501 | 0.002 | 0.957 | 0.694 | 0.608 | 0.000 |
| 1375637_at   | AI010441 | similar to RIKEN cDNA 1110003E01                                                  | RGD1311122                  | 0.716 | 0.092 | 0.782 | 0.022 | 0.681 | 0.247 | 0.643 | 0.030 |
| 1385110_at   | AI029476 | Similar to RIKEN cDNA 1110003E01                                                  | RGD1311122                  | 0.776 | 0.998 | 1.515 | 0.019 | 0.886 | 0.902 | 1.344 | 0.016 |
| 1372675_at   | BI291418 | similar to RIKEN cDNA 1110004E09                                                  | RGD1306954                  | 0.747 | 0.112 | 1.198 | 0.230 | 0.707 | 0.036 | 1.167 | 0.595 |
| 1383281_at   | AA866227 | similar to RIKEN cDNA 1110005A03                                                  | RGD1306284                  | 0.785 | 0.182 | 0.706 | 0.001 | 1.272 | 0.768 | 0.791 | 0.009 |
| 1388344_at   | BI283112 | similar to RIKEN cDNA 1110005A23                                                  | RGD1305692                  | 0.728 | 0.300 | 0.588 | 0.101 | 0.775 | 0.394 | 0.707 | 0.047 |
| 1374333_at   | AI227700 | similar to RIKEN cDNA 1110007C09 (predicted)                                      | RGD1306058_predicted        | 0.457 | 0.141 | 0.493 | 0.041 | 0.285 | 0.025 | 0.423 | 0.018 |
| 1372596_at   | BI284774 | similar to RIKEN cDNA 1110007L15 (predicted)                                      | RGD1311660_predicted        | 0.666 | 0.061 | 2.234 | 0.006 | 0.439 | 0.037 | 1.271 | 0.212 |
| 1376016_at   | BF285425 | similar to RIKEN cDNA 1110007L15 (predicted)                                      | RGD1311660_predicted        | 0.534 | 0.091 | 0.741 | 0.006 | 0.583 | 0.004 | 0.627 | 0.000 |
| 1371478_at   | AI409756 | similar to RIKEN cDNA 1110008F13                                                  | RGD1307752                  | 0.767 | 0.141 | 1.887 | 0.002 | 0.838 | 0.133 | 1.607 | 0.002 |
| 1386259_a_at | AI104152 | similar to RIKEN cDNA 1110008J03 (predicted)                                      | RGD1306772_predicted        | 1.416 | 0.675 | 0.642 | 0.433 | 0.701 | 0.086 | 0.974 | 0.754 |
| 1372946_at   | AI411957 | similar to RIKEN cDNA 1110012L19 (predicted)                                      | RGD1562747_predicted        | 0.866 | 0.819 | 0.435 | 0.090 | 0.750 | 0.873 | 0.732 | 0.366 |
| 1388457_at   | AI176633 | similar to RIKEN cDNA 1110012M11                                                  | MGC72581                    | 0.700 | 0.170 | 0.880 | 0.162 | 0.654 | 0.009 | 0.872 | 0.060 |
| 1389011_at   | BG374333 | similar to RIKEN cDNA 1110014D18                                                  | RGD1305156                  | 1.282 | 0.086 | 1.213 | 0.148 | 1.233 | 0.394 | 1.033 | 0.850 |
| 1377692_at   | BF558563 | similar to RIKEN cDNA 1110018J12 (predicted)                                      | RGD1565310_predicted        | 1.011 | 0.769 | 1.285 | 0.484 | 1.576 | 0.052 | 1.105 | 0.224 |
| 1377141_at   | AI103397 | Similar to RIKEN cDNA 1110018J18                                                  | LOC498685                   | 0.363 | 0.020 | 0.220 | 0.000 | 0.293 | 0.010 | 0.223 | 0.003 |
| 1383443_at   | AI146079 | similar to RIKEN cDNA 1110018J18                                                  | LOC498685                   | 1.007 | 0.871 | 0.962 | 0.975 | 1.264 | 0.219 | 1.083 | 0.731 |
| 1388665_at   | BM390489 | similar to RIKEN cDNA 1110020A23 (predicted)                                      | RGD1308134_predicted        | 0.496 | 0.482 | 1.615 | 0.024 | 0.522 | 0.066 | 1.134 | 0.327 |
| 1388408_at   | AA800199 | similar to RIKEN cDNA 1110020C13                                                  | RGD1307129                  | 1.162 | 0.189 | 1.167 | 0.036 | 1.101 | 0.079 | 1.205 | 0.105 |
| 1367529_at   | BE113989 | similar to RIKEN cDNA 1110021N07 /// similar to Der1-like domain family, member 1 | RGD1311835 ///<br>LOC500872 | 0.806 | 0.133 | 1.519 | 0.006 | 0.777 | 0.234 | 1.436 | 0.025 |
| 1374581_at   | BM384392 | similar to RIKEN cDNA 1110021N07 /// similar to Der1-like domain family, member 1 | RGD1311835 ///<br>LOC500872 | 0.908 | 0.215 | 1.734 | 0.001 | 0.799 | 0.323 | 1.431 | 0.004 |
| 1389615_at   | BI284801 | similar to RIKEN cDNA 1110021N07 /// similar to Der1-like domain family, member 1 | RGD1311835 ///<br>LOC500872 | 0.576 | 0.428 | 2.337 | 0.006 | 0.545 | 0.006 | 2.070 | 0.006 |
| 1384407_at   | AI602856 | similar to RIKEN cDNA 1110025F24 (predicted)                                      | RGD1311451_predicted        | 0.801 | 0.440 | 0.382 | 0.051 | 0.814 | 0.199 | 0.557 | 0.057 |
| 1373822_at   | BI275708 | similar to RIKEN cDNA 1110025L05 (predicted)                                      | RGD1565363_predicted        | 1.080 | 0.299 | 1.787 | 0.006 | 1.018 | 0.752 | 1.322 | 0.017 |
| 1388621_at   | BG378803 | similar to RIKEN cDNA 1110030J09 (predicted)                                      | RGD1563202_predicted        | 0.593 | 0.649 | 0.896 | 0.159 | 0.567 | 0.139 | 0.663 | 0.101 |
| 1374292_at   | BF414124 | similar to RIKEN cDNA 1110031I02                                                  | RGD1305007                  | 0.762 | 0.986 | 1.060 | 0.731 | 0.944 | 0.377 | 1.161 | 0.771 |
| 1372677_at   | BM392053 | similar to RIKEN cDNA 1110033C18                                                  | RGD1304783                  | 0.986 | 0.347 | 1.852 | 0.000 | 0.798 | 0.068 | 1.307 | 0.070 |
| 1372644_at   | BI282137 | similar to RIKEN cDNA 1110038F14 (predicted)                                      | RGD1304721_predicted        | 0.811 | 0.734 | 2.430 | 0.052 | 1.194 | 0.701 | 1.157 | 0.524 |
| 1373562_at   | BF416880 | similar to RIKEN cDNA 1110055N21 (predicted)                                      | RGD1309370_predicted        | 0.806 | 0.035 | 1.004 | 0.374 | 0.840 | 0.185 | 0.997 | 0.983 |
| 1371623_at   | AI411896 | similar to RIKEN cDNA 1110058L19 (predicted)                                      | RGD1309248_predicted        | 0.658 | 0.701 | 1.116 | 0.750 | 0.592 | 0.539 | 1.245 | 0.046 |
| 1372667_at   | AI170752 | similar to RIKEN cDNA 1110059E24                                                  | RGD1359158                  | 1.101 | 0.105 | 1.889 | 0.122 | 0.733 | 0.442 | 1.404 | 0.067 |
| 1399117_at   | BF546356 | similar to RIKEN cDNA 1110059G10                                                  | RGD1311745                  | 0.937 | 0.875 | 0.601 | 0.209 | 0.812 | 0.377 | 1.055 | 0.412 |
| 1371860_at   | AA944016 | similar to RIKEN cDNA 1110059P08                                                  | RGD1305031                  | 1.041 | 0.452 | 1.263 | 0.261 | 0.803 | 0.815 | 1.373 | 0.151 |
| 1374145_at   | BF414252 | similar to RIKEN cDNA 1110061L23                                                  | RGD1309809                  | 0.572 | 0.080 | 0.623 | 0.027 | 0.626 | 0.116 | 0.776 | 0.136 |
| 1383077_at   | BI287209 | similar to RIKEN cDNA 1110063F24 (predicted)                                      | RGD1311622_predicted        | 0.866 | 0.153 | 1.049 | 0.397 | 0.954 | 0.254 | 0.973 | 0.647 |
| 1374560_at   | AI137296 | similar to RIKEN cDNA 1190002C06                                                  | MGC124825                   | 1.422 | 0.099 | 3.688 | 0.023 | 1.200 | 0.119 | 2.124 | 0.641 |
| 1389629_at   | AA819400 | similar to RIKEN cDNA 1190003A07 (predicted)                                      | RGD1307103_predicted        | 1.153 | 0.296 | 1.493 | 0.020 | 0.991 | 0.669 | 1.215 | 0.102 |
| 1373875_at   | BG381541 | similar to RIKEN cDNA 1190005P17 (predicted)                                      | RGD1308261_predicted        | 0.923 | 0.186 | 2.269 | 0.001 | 0.714 | 0.058 | 2.022 | 0.015 |
| 1372918_at   | BM385785 | similar to RIKEN cDNA 1190017O12 (predicted)                                      | RGD1566291_predicted        | 0.763 | 0.445 | 1.281 | 0.154 | 0.693 | 0.113 | 1.123 | 0.089 |
| 1399049_at   | AI230073 | similar to RIKEN cDNA 1200003C05 (predicted)                                      | RGD1308917_predicted        | 0.529 | 0.097 | 0.851 | 0.175 | 0.524 | 0.052 | 0.846 | 0.113 |
| 1373588_at   | H33457   | similar to RIKEN cDNA 1200004M23                                                  | RGD1310323                  | 2.888 | 0.011 | 3.285 | 0.000 | 3.572 | 0.010 | 3.597 | 0.001 |
| 1383471_at   | BI286125 | similar to RIKEN cDNA 1200006F02                                                  | RGD1307594                  | 0.996 | 0.827 | 0.782 | 0.171 | 0.996 | 0.990 | 0.899 | 0.164 |
| 1382150_at   | BG377042 | similar to RIKEN cDNA 1200007B05 gene                                             | RGD1305072                  | 0.704 | 0.057 | 0.370 | 0.000 | 0.602 | 0.017 | 0.481 | 0.008 |
| 1386088_at   | AW141957 | similar to RIKEN cDNA 1200007B05 gene                                             | RGD1305072                  | 0.502 | 0.074 | 0.469 | 0.001 | 0.537 | 0.151 | 0.461 | 0.013 |
| 1389970_at   | BG378319 | similar to RIKEN cDNA 1200009B18; EST AA408438                                    | RGD1310606                  | 0.823 | 0.008 | 0.532 | 0.000 | 0.939 | 0.478 | 0.640 | 0.005 |
| 1375819_at   | BI299678 | similar to RIKEN cDNA 1200011I18                                                  | RGD1307254                  | 0.635 | 0.064 | 0.796 | 0.016 | 0.621 | 0.034 | 0.796 | 0.124 |
| 1377252_at   | BF411321 | similar to RIKEN cDNA 1200011M11 (predicted)                                      | RGD1306862_predicted        | 0.999 | 0.995 | 0.699 | 0.157 | 0.966 | 0.975 | 0.945 | 0.163 |
| 1388406_at   | AI412090 | similar to RIKEN cDNA 1200013P24                                                  | RGD1308915                  | 0.313 | 0.048 | 0.649 | 0.301 | 0.323 | 0.000 | 0.840 | 0.041 |
| 1390264_at   | BF413854 | similar to RIKEN cDNA 1200014J11 (predicted)                                      | RGD1308139_predicted        | 1.452 | 0.169 | 2.154 | 0.001 | 1.218 | 0.285 | 1.314 | 0.004 |
| 1394213_at   | AI030380 | similar to RIKEN cDNA 1200014J11 (predicted)                                      | RGD1308139_predicted        | 1.482 | 0.514 | 1.729 | 0.064 | 0.884 | 0.182 | 1.000 | 0.989 |
| 1377268_at   | BM390418 | similar to RIKEN cDNA 1200014M14                                                  | RGD1310597                  | 0.636 | 0.016 | 1.035 | 0.374 | 0.579 | 0.025 | 1.001 | 0.990 |
| 1390868_at   | BF403073 | similar to RIKEN cDNA 1200016B10 (predicted)                                      | RGD1308695_predicted        | 0.811 | 0.139 | 3.101 | 0.066 | 1.156 | 0.712 | 2.116 | 0.163 |
| 1388907_at   | BF400873 | similar to RIKEN cDNA 1200016B17                                                  | RGD1306053                  | 0.463 | 0.384 | 0.600 | 0.021 | 0.532 | 0.008 | 0.472 | 0.008 |
| 1371730_at   | BF418786 | similar to RIKEN cDNA 1300002A08                                                  | RGD1305466                  | 0.797 | 0.016 | 0.879 | 0.222 | 0.687 | 0.096 | 0.856 | 0.027 |
| 1379254_at   | AA945882 | similar to RIKEN cDNA 1300007B12; clone MNCb-2755                                 | RGD1309892                  | 0.959 | 0.860 | 1.094 | 0.338 | 0.896 | 0.590 | 1.128 | 0.158 |

|              |          |                                                                                                                                                                                                                                                                                                                                                                                                                                                                                                                                                                                                                                                                                            |                                                                                                                                                                                                                                                                                                           |       |       |       |       |       |       |       |       |
|--------------|----------|--------------------------------------------------------------------------------------------------------------------------------------------------------------------------------------------------------------------------------------------------------------------------------------------------------------------------------------------------------------------------------------------------------------------------------------------------------------------------------------------------------------------------------------------------------------------------------------------------------------------------------------------------------------------------------------------|-----------------------------------------------------------------------------------------------------------------------------------------------------------------------------------------------------------------------------------------------------------------------------------------------------------|-------|-------|-------|-------|-------|-------|-------|-------|
| 1374414_at   | AI412962 | similar to RIKEN cDNA 1300010M03                                                                                                                                                                                                                                                                                                                                                                                                                                                                                                                                                                                                                                                           | RGD1306844                                                                                                                                                                                                                                                                                                | 0.783 | 0.343 | 1.052 | 0.696 | 0.540 | 0.019 | 0.801 | 0.021 |
| 1376087_at   | BM386653 | similar to RIKEN cDNA 1300010M03 (predicted)                                                                                                                                                                                                                                                                                                                                                                                                                                                                                                                                                                                                                                               | RGD1561189_predicted                                                                                                                                                                                                                                                                                      | 0.739 | 0.612 | 0.867 | 0.570 | 1.041 | 0.839 | 1.159 | 0.270 |
| 1381187_at   | BE102551 | Similar to RIKEN cDNA 1300017J02                                                                                                                                                                                                                                                                                                                                                                                                                                                                                                                                                                                                                                                           | RGD1310507                                                                                                                                                                                                                                                                                                | 1.012 | 0.992 | 1.013 | 0.949 | 1.020 | 0.638 | 0.996 | 0.958 |
| 1398925_at   | BI274664 | similar to RIKEN cDNA 1300018I05                                                                                                                                                                                                                                                                                                                                                                                                                                                                                                                                                                                                                                                           | RGD1307801                                                                                                                                                                                                                                                                                                | 1.288 | 0.176 | 0.638 | 0.037 | 1.596 | 0.002 | 0.824 | 0.011 |
| 1373655_at   | BG371863 | similar to RIKEN cDNA 1500002O20                                                                                                                                                                                                                                                                                                                                                                                                                                                                                                                                                                                                                                                           | RGD1309888                                                                                                                                                                                                                                                                                                | 0.796 | 0.125 | 1.231 | 0.014 | 0.931 | 0.744 | 1.113 | 0.561 |
| 1376681_at   | AI177038 | similar to RIKEN cDNA 1500003O22                                                                                                                                                                                                                                                                                                                                                                                                                                                                                                                                                                                                                                                           | RGD1308302                                                                                                                                                                                                                                                                                                | 0.685 | 0.187 | 1.091 | 0.518 | 0.919 | 0.442 | 1.284 | 0.088 |
| 1375712_at   | AI600090 | Similar to RIKEN cDNA 1500006O09 (predicted)                                                                                                                                                                                                                                                                                                                                                                                                                                                                                                                                                                                                                                               | RGD1305475_predicted                                                                                                                                                                                                                                                                                      | 0.789 | 0.521 | 1.001 | 0.868 | 0.712 | 0.003 | 1.291 | 0.156 |
| 1398385_at   | AI169641 | similar to RIKEN cDNA 1500006O09 (predicted)                                                                                                                                                                                                                                                                                                                                                                                                                                                                                                                                                                                                                                               | RGD1305475_predicted                                                                                                                                                                                                                                                                                      | 0.548 | 0.610 | 0.813 | 0.232 | 0.633 | 0.076 | 1.116 | 0.807 |
| 1377133_at   | BE100973 | Similar to RIKEN cDNA 1500009M05 (predicted)                                                                                                                                                                                                                                                                                                                                                                                                                                                                                                                                                                                                                                               | RGD1566242_predicted                                                                                                                                                                                                                                                                                      | 2.448 | 0.030 | 1.097 | 0.801 | 1.510 | 0.011 | 1.180 | 0.997 |
| 1392662_at   | AI229905 | similar to RIKEN cDNA 1500009M05 (predicted)                                                                                                                                                                                                                                                                                                                                                                                                                                                                                                                                                                                                                                               | RGD1566242_predicted                                                                                                                                                                                                                                                                                      | 0.748 | 0.755 | 2.746 | 0.011 | 0.554 | 0.225 | 2.367 | 0.007 |
| 1371828_at   | BM386571 | similar to RIKEN cDNA 1500011H22                                                                                                                                                                                                                                                                                                                                                                                                                                                                                                                                                                                                                                                           | RGD1310861                                                                                                                                                                                                                                                                                                | 0.463 | 0.132 | 0.630 | 0.001 | 0.690 | 0.039 | 0.661 | 0.055 |
| 1372391_at   | AI598937 | similar to RIKEN cDNA 1500016H10 (predicted)                                                                                                                                                                                                                                                                                                                                                                                                                                                                                                                                                                                                                                               | RGD1308469_predicted                                                                                                                                                                                                                                                                                      | 0.914 | 0.938 | 1.306 | 0.012 | 0.820 | 0.094 | 1.629 | 0.016 |
| 1389013_at   | BF420644 | similar to RIKEN cDNA 1500016H10 (predicted)                                                                                                                                                                                                                                                                                                                                                                                                                                                                                                                                                                                                                                               | RGD1308469_predicted                                                                                                                                                                                                                                                                                      | 1.059 | 0.980 | 1.413 | 0.178 | 0.635 | 0.256 | 1.322 | 0.243 |
| 1373042_at   | AW434104 | similar to RIKEN cDNA 1500016L11 (predicted)                                                                                                                                                                                                                                                                                                                                                                                                                                                                                                                                                                                                                                               | RGD1305050_predicted                                                                                                                                                                                                                                                                                      | 1.001 | 0.998 | 1.162 | 0.176 | 1.040 | 0.178 | 1.006 | 0.990 |
| 1370360_at   | AF146738 | similar to RIKEN cDNA 1500031L02                                                                                                                                                                                                                                                                                                                                                                                                                                                                                                                                                                                                                                                           | RGD621352                                                                                                                                                                                                                                                                                                 | 0.378 | 0.197 | 0.285 | 0.001 | 0.308 | 0.007 | 0.440 | 0.002 |
| 1385711_at   | AW507178 | similar to RIKEN cDNA 1500031M22 (predicted)                                                                                                                                                                                                                                                                                                                                                                                                                                                                                                                                                                                                                                               | RGD1311752_predicted                                                                                                                                                                                                                                                                                      | 0.780 | 0.032 | 1.554 | 0.024 | 0.337 | 0.002 | 0.699 | 0.087 |
| 1391427_at   | AW254563 | Similar to RIKEN cDNA 1500031M22 (predicted)                                                                                                                                                                                                                                                                                                                                                                                                                                                                                                                                                                                                                                               | RGD1311752_predicted                                                                                                                                                                                                                                                                                      | 0.874 | 0.189 | 1.217 | 0.767 | 0.396 | 0.052 | 1.173 | 0.163 |
| 1389459_at   | BE116947 | Similar to RIKEN cDNA 1600012F09 (predicted)                                                                                                                                                                                                                                                                                                                                                                                                                                                                                                                                                                                                                                               | RGD1306613_predicted                                                                                                                                                                                                                                                                                      | 1.903 | 0.225 | 1.425 | 0.048 | 1.847 | 0.077 | 1.951 | 0.003 |
| 1392504_at   | BI297184 | similar to RIKEN cDNA 1600012F09 (predicted)                                                                                                                                                                                                                                                                                                                                                                                                                                                                                                                                                                                                                                               | RGD1306613_predicted                                                                                                                                                                                                                                                                                      | 0.623 | 0.248 | 2.425 | 0.017 | 0.293 | 0.028 | 1.239 | 0.337 |
| 1395696_at   | BF560674 | similar to RIKEN cDNA 1600012F09 (predicted) /// hypothetical protein LOC500028                                                                                                                                                                                                                                                                                                                                                                                                                                                                                                                                                                                                            | RGD1306613_predicted ///<br>LOC500028                                                                                                                                                                                                                                                                     | 0.998 | 0.857 | 1.024 | 0.830 | 1.005 | 0.993 | 0.995 | 0.983 |
| 1395887_at   | BF283642 | similar to RIKEN cDNA 1600029D21                                                                                                                                                                                                                                                                                                                                                                                                                                                                                                                                                                                                                                                           | LOC363060                                                                                                                                                                                                                                                                                                 | 1.119 | 0.047 | 1.030 | 0.635 | 1.007 | 0.892 | 0.996 | 0.843 |
| 1384696_at   | BE113106 | similar to RIKEN cDNA 1700001E04                                                                                                                                                                                                                                                                                                                                                                                                                                                                                                                                                                                                                                                           | MGC116197                                                                                                                                                                                                                                                                                                 | 0.993 | 0.819 | 1.008 | 0.855 | 1.003 | 0.952 | 0.998 | 0.495 |
| 1397537_at   | BG665530 | similar to RIKEN cDNA 1700001E04 /// similar to cDNA sequence AY358078 /// similar to RIKEN cDNA 4930555G01 /// similar to RIKEN cDNA 4930555G01 /// similar to RIKEN cDNA 1700001E04 /// similar to RIKEN cDNA 4930555G01 /// similar to cDNA sequence AY358078 /// similar to RIKEN cDNA 4930555G01 /// similar to RIKEN cDNA 1700001E04                                                                                                                                                                                                                                                                                                                                                 | LOC363433 /// LOC363434<br>/// LOC367381 ///<br>LOC500070 /// LOC501091<br>/// LOC501092 ///<br>LOC501221 /// LOC501222<br>/// LOC501399                                                                                                                                                                  | 1.016 | 0.978 | 1.006 | 0.045 | 1.267 | 0.374 | 0.984 | 0.050 |
| 1389600_at   | AW524433 | similar to RIKEN cDNA 1700001E04 /// similar to RIKEN cDNA 1700001E04 /// similar to RIKEN cDNA 1700001E04 /// hypothetical protein LOC363306 /// similar to RIKEN cDNA 1700001E04 /// similar to RIKEN cDNA 1700001E04 /// similar to RIKEN cDNA 1700001E04 /// similar to RIKEN cDNA 4930555G01 /// similar to RIKEN cDNA 2610042L04 /// similar to cDNA sequence AY358078 /// similar to cDNA sequence AY358078 /// similar to RIKEN cDNA 1700001E04 /// similar to cDNA sequence AY358078 /// similar to Reticulocalbin 1 precursor /// similar to RIKEN cDNA 4930555G01 /// similar to cDNA sequence AY358078 /// hypothetical protein LOC501396 /// similar to RIKEN cDNA 1700001E04 | LOC301748 /// LOC316186<br>/// LOC360998 ///<br>LOC363306 /// LOC363320<br>/// LOC363433 ///<br>LOC498374 /// LOC501091<br>/// LOC501092 ///<br>LOC501093 /// LOC501221<br>/// LOC501225 ///<br>LOC501226 /// LOC501245<br>/// LOC501250 ///<br>LOC501253 /// LOC501393<br>/// LOC501396 ///<br>LOC501399 | 1.128 | 0.761 | 1.667 | 0.229 | 1.625 | 0.084 | 1.839 | 0.041 |
| 1379347_at   | BM389290 | Similar to RIKEN cDNA 1700023M03                                                                                                                                                                                                                                                                                                                                                                                                                                                                                                                                                                                                                                                           | RGD1305457                                                                                                                                                                                                                                                                                                | 0.383 | 0.003 | 0.824 | 0.008 | 0.562 | 0.006 | 0.568 | 0.036 |
| 1376689_at   | BF282636 | similar to RIKEN cDNA 1700023M03                                                                                                                                                                                                                                                                                                                                                                                                                                                                                                                                                                                                                                                           | RGD1305457                                                                                                                                                                                                                                                                                                | 0.475 | 0.137 | 0.299 | 0.050 | 0.640 | 0.757 | 0.679 | 0.346 |
| 1390502_at   | BF388757 | similar to RIKEN cDNA 1700025G04 gene (predicted)                                                                                                                                                                                                                                                                                                                                                                                                                                                                                                                                                                                                                                          | RGD1309104_predicted                                                                                                                                                                                                                                                                                      | 0.997 | 0.979 | 1.195 | 0.170 | 1.083 | 0.731 | 1.083 | 0.982 |
| 1398371_at   | AI409075 | similar to RIKEN cDNA 1700034M03 gene                                                                                                                                                                                                                                                                                                                                                                                                                                                                                                                                                                                                                                                      | RGD1304751                                                                                                                                                                                                                                                                                                | 1.710 | 0.005 | 1.984 | 0.026 | 1.428 | 0.031 | 2.464 | 0.007 |
| 1388563_at   | AI169287 | similar to RIKEN cDNA 1700034P14 (predicted)                                                                                                                                                                                                                                                                                                                                                                                                                                                                                                                                                                                                                                               | RGD1305492_predicted                                                                                                                                                                                                                                                                                      | 1.372 | 0.024 | 2.113 | 0.000 | 1.240 | 0.072 | 1.529 | 0.039 |
| 1396128_at   | BG670404 | similar to RIKEN cDNA 1700034P14 (predicted)                                                                                                                                                                                                                                                                                                                                                                                                                                                                                                                                                                                                                                               | RGD1305492_predicted                                                                                                                                                                                                                                                                                      | 1.003 | 0.735 | 1.774 | 0.124 | 0.633 | 0.159 | 1.193 | 0.473 |
| 1373436_at   | AI171288 | similar to RIKEN cDNA 1700040L02 (predicted)                                                                                                                                                                                                                                                                                                                                                                                                                                                                                                                                                                                                                                               | RGD1306739_predicted                                                                                                                                                                                                                                                                                      | 1.196 | 0.130 | 1.140 | 0.188 | 1.198 | 0.130 | 1.052 | 0.081 |
| 1386566_at   | BF558962 | Similar to RIKEN cDNA 1700047I17 (predicted)                                                                                                                                                                                                                                                                                                                                                                                                                                                                                                                                                                                                                                               | RGD1562713_predicted                                                                                                                                                                                                                                                                                      | 6.037 | 0.000 | 2.202 | 0.044 | 4.903 | 0.010 | 1.678 | 0.012 |
| 1382884_at   | AI009813 | Similar to RIKEN cDNA 1700047I17 (predicted)                                                                                                                                                                                                                                                                                                                                                                                                                                                                                                                                                                                                                                               | RGD1562713_predicted                                                                                                                                                                                                                                                                                      | 6.740 | 0.017 | 3.477 | 0.004 | 4.823 | 0.067 | 2.485 | 0.009 |
| 1376883_at   | BI284887 | similar to RIKEN cDNA 1700048E23                                                                                                                                                                                                                                                                                                                                                                                                                                                                                                                                                                                                                                                           | MGC93920                                                                                                                                                                                                                                                                                                  | 0.872 | 0.675 | 0.704 | 0.036 | 0.792 | 0.126 | 0.787 | 0.252 |
| 1393027_at   | AI058848 | similar to RIKEN cDNA 1700052N19                                                                                                                                                                                                                                                                                                                                                                                                                                                                                                                                                                                                                                                           | RGD1305235                                                                                                                                                                                                                                                                                                | 1.291 | 0.545 | 1.173 | 0.111 | 0.993 | 0.796 | 1.696 | 0.017 |
| 1389187_at   | BI286421 | Similar to RIKEN cDNA 1700088E04                                                                                                                                                                                                                                                                                                                                                                                                                                                                                                                                                                                                                                                           | RGD1359634                                                                                                                                                                                                                                                                                                | 1.519 | 0.783 | 1.449 | 0.702 | 0.968 | 0.305 | 1.278 | 0.557 |
| 1379044_at   | AW534064 | Similar to RIKEN cDNA 1700108L22                                                                                                                                                                                                                                                                                                                                                                                                                                                                                                                                                                                                                                                           | RGD1307509                                                                                                                                                                                                                                                                                                | 0.828 | 0.477 | 0.737 | 0.071 | 0.972 | 0.135 | 0.424 | 0.030 |
| 1382219_at   | AA945904 | similar to RIKEN cDNA 1700108L22                                                                                                                                                                                                                                                                                                                                                                                                                                                                                                                                                                                                                                                           | RGD1307509                                                                                                                                                                                                                                                                                                | 0.957 | 0.502 | 1.400 | 0.137 | 0.775 | 0.020 | 1.235 | 0.259 |
| 1379473_at   | BI284815 | similar to RIKEN cDNA 1700108L22                                                                                                                                                                                                                                                                                                                                                                                                                                                                                                                                                                                                                                                           | RGD1307509                                                                                                                                                                                                                                                                                                | 0.929 | 0.792 | 0.986 | 0.932 | 0.974 | 0.240 | 0.500 | 0.121 |
| 1372090_at   | AI231566 | similar to RIKEN cDNA 1700108M19 (predicted)                                                                                                                                                                                                                                                                                                                                                                                                                                                                                                                                                                                                                                               | RGD1560395_predicted                                                                                                                                                                                                                                                                                      | 2.196 | 0.093 | 1.506 | 0.011 | 3.215 | 0.004 | 1.964 | 0.006 |
| 1377387_a_at | BF414330 | similar to RIKEN cDNA 1810009K13 (predicted)                                                                                                                                                                                                                                                                                                                                                                                                                                                                                                                                                                                                                                               | RGD1562184_predicted                                                                                                                                                                                                                                                                                      | 1.001 | 0.076 | 1.041 | 0.855 | 2.898 | 0.053 | 1.218 | 0.268 |
| 1374183_at   | AI705068 | similar to RIKEN cDNA 1810011O16 (predicted)                                                                                                                                                                                                                                                                                                                                                                                                                                                                                                                                                                                                                                               | RGD1309624_predicted                                                                                                                                                                                                                                                                                      | 1.113 | 0.854 | 4.305 | 0.003 | 0.450 | 0.062 | 2.425 | 0.016 |
| 1377830_a_at | BF281728 | similar to RIKEN cDNA 1810014F10 gene (predicted)                                                                                                                                                                                                                                                                                                                                                                                                                                                                                                                                                                                                                                          | RGD1311186_predicted                                                                                                                                                                                                                                                                                      | 0.326 | 0.018 | 0.566 | 0.241 | 0.307 | 0.027 | 0.752 | 0.372 |



|              |          |                                                                                   |                                       |        |       |        |       |        |       |        |       |
|--------------|----------|-----------------------------------------------------------------------------------|---------------------------------------|--------|-------|--------|-------|--------|-------|--------|-------|
| 1376861_at   | AW525240 | similar to RIKEN cDNA 1810018L05 /// similar to motile sperm domain containing 1  | LOC317312 /// LOC501648               | 1.354  | 0.445 | 1.529  | 0.124 | 1.655  | 0.371 | 2.521  | 0.640 |
| 1383104_at   | BI295116 | similar to RIKEN cDNA 1810020D17 (predicted)                                      | RGD1561459_predicted                  | 0.942  | 0.775 | 0.574  | 0.072 | 0.841  | 0.612 | 0.929  | 0.087 |
| 1371634_at   | BE107851 | similar to RIKEN cDNA 1810020E01                                                  | RGD1305677                            | 0.827  | 0.639 | 1.828  | 0.002 | 0.715  | 0.802 | 1.875  | 0.001 |
| 1373585_at   | BE116774 | similar to RIKEN cDNA 1810020G14 (predicted)                                      | RGD1310781_predicted                  | 0.476  | 0.224 | 0.463  | 0.004 | 0.409  | 0.254 | 0.536  | 0.009 |
| 1389561_at   | BE110624 | similar to RIKEN cDNA 1810021J13                                                  | RGD1311364                            | 0.275  | 0.004 | 0.275  | 0.001 | 0.349  | 0.008 | 0.262  | 0.016 |
| 1388884_at   | BM390774 | similar to RIKEN cDNA 1810022C23                                                  | RGD1310224                            | 0.774  | 0.427 | 0.505  | 0.014 | 1.073  | 0.681 | 0.776  | 0.423 |
| 1390579_at   | BI294760 | similar to RIKEN cDNA 1810029B16 (predicted)                                      | RGD1305222_predicted                  | 1.000  | 0.275 | 7.969  | 0.007 | 0.985  | 0.100 | 2.693  | 0.019 |
| 1394240_at   | AI014154 | Similar to RIKEN cDNA 1810030N24 (predicted)                                      | RGD1305158_predicted                  | 0.721  | 0.039 | 0.676  | 0.031 | 0.311  | 0.016 | 0.812  | 0.010 |
| 1399107_at   | BE112193 | similar to RIKEN cDNA 1810030N24 (predicted)                                      | RGD1305158_predicted                  | 0.534  | 0.041 | 0.472  | 0.068 | 0.264  | 0.044 | 0.685  | 0.236 |
| 1384550_at   | AW917943 | similar to RIKEN cDNA 1810030O07 (predicted)                                      | RGD1565685_predicted                  | 1.231  | 0.219 | 0.679  | 0.051 | 1.856  | 0.110 | 0.834  | 0.788 |
| 1383100_at   | AI070897 | similar to RIKEN cDNA 1810036I24 (predicted)                                      | RGD1306343_predicted                  | 0.647  | 0.097 | 0.916  | 0.532 | 0.777  | 0.091 | 1.056  | 0.487 |
| 1377654_at   | BE328936 | similar to RIKEN cDNA 1810037C20 (predicted)                                      | RGD1562076_predicted                  | 0.784  | 0.269 | 0.565  | 0.003 | 0.768  | 0.084 | 0.676  | 0.058 |
| 1388306_at   | BM383758 | similar to RIKEN cDNA 1810042K04 (predicted)                                      | RGD1305593_predicted                  | 0.656  | 0.427 | 1.045  | 0.770 | 0.599  | 0.035 | 1.021  | 0.881 |
| 1388770_at   | BI275670 | similar to RIKEN cDNA 1810045K17                                                  | RGD1304890                            | 0.463  | 0.105 | 0.711  | 0.030 | 0.563  | 0.010 | 0.570  | 0.021 |
| 1372813_at   | AA858862 | similar to RIKEN cDNA 1810046J19 (predicted)                                      | RGD1306682_predicted                  | 0.622  | 0.626 | 1.253  | 0.435 | 0.709  | 0.295 | 1.141  | 0.851 |
| 1376086_at   | AW528625 | similar to RIKEN cDNA 1810047C23                                                  | RGD1311161                            | 0.766  | 0.025 | 1.308  | 0.047 | 0.665  | 0.048 | 1.212  | 0.128 |
| 1373071_at   | AI103101 | similar to RIKEN cDNA 1810054G18 (predicted)                                      | RGD1308901_predicted                  | 0.953  | 0.777 | 2.367  | 0.003 | 0.597  | 0.395 | 1.829  | 0.007 |
| 1374233_at   | BG372723 | similar to RIKEN cDNA 1810055E12 (predicted)                                      | RGD1308326_predicted                  | 0.547  | 0.186 | 0.556  | 0.020 | 0.784  | 0.045 | 0.561  | 0.050 |
| 1375829_at   | AW525101 | similar to RIKEN cDNA 1810055E12 (predicted)                                      | RGD1308326_predicted                  | 0.989  | 0.611 | 1.760  | 0.052 | 0.996  | 0.975 | 0.940  | 0.239 |
| 1390232_at   | BM388441 | similar to RIKEN cDNA 1810055G02                                                  | RGD1311946                            | 0.367  | 0.017 | 0.921  | 0.509 | 0.342  | 0.016 | 0.928  | 0.772 |
| 1389467_at   | BM391248 | similar to RIKEN cDNA 1810057C19                                                  | MGC108778                             | 0.330  | 0.007 | 0.344  | 0.030 | 0.229  | 0.012 | 0.240  | 0.053 |
| 1383594_at   | AW914775 | similar to RIKEN cDNA 1810060J02                                                  | LOC312863                             | 0.857  | 0.283 | 0.916  | 0.643 | 0.998  | 0.916 | 0.925  | 0.609 |
| 1386755_at   | BF552559 | similar to RIKEN cDNA 1810060J02                                                  | LOC312863                             | 0.622  | 0.635 | 1.390  | 0.273 | 1.005  | 0.886 | 1.121  | 0.567 |
| 1374807_at   | AI230067 | similar to RIKEN cDNA 1810063B07 gene (predicted)                                 | RGD1310877_predicted                  | 0.878  | 0.521 | 0.671  | 0.007 | 1.169  | 0.237 | 0.584  | 0.087 |
| 1376896_at   | AI227699 | Similar to RIKEN cDNA 1810074P20 (predicted)                                      | RGD1309308_predicted                  | 0.637  | 0.305 | 0.762  | 0.094 | 0.817  | 0.106 | 0.724  | 0.094 |
| 1382526_at   | BF281921 | similar to RIKEN cDNA 1810074P20 (predicted)                                      | RGD1309308_predicted                  | 0.693  | 0.789 | 1.412  | 0.030 | 1.145  | 0.836 | 1.086  | 0.413 |
| 1372814_at   | BF283084 | similar to RIKEN cDNA 2010005O13                                                  | RGD1310623                            | 1.118  | 0.708 | 0.766  | 0.068 | 1.124  | 0.743 | 0.813  | 0.108 |
| 1393005_at   | AW916965 | similar to RIKEN cDNA 2010005O13                                                  | RGD1310623                            | 1.055  | 0.735 | 1.152  | 0.157 | 0.901  | 0.989 | 1.400  | 0.033 |
| 1381588_at   | BG377308 | similar to RIKEN cDNA 2010005O13                                                  | RGD1310623                            | 0.968  | 0.948 | 1.025  | 0.893 | 0.967  | 0.944 | 1.043  | 0.913 |
| 1373244_at   | AI412948 | similar to RIKEN cDNA 2010008E23 gene                                             | RGD1304758                            | 1.184  | 0.172 | 1.241  | 0.000 | 1.396  | 0.087 | 1.228  | 0.001 |
| 1394807_at   | AW522357 | Similar to RIKEN cDNA 2010008E23 gene                                             | RGD1304758                            | 1.626  | 0.347 | 1.702  | 0.066 | 1.717  | 0.034 | 1.128  | 0.236 |
| 1389782_at   | AI408993 | similar to RIKEN cDNA 2010107G23 (predicted)                                      | RGD1305587_predicted                  | 0.547  | 0.050 | 0.554  | 0.003 | 0.554  | 0.062 | 0.772  | 0.027 |
| 1391776_at   | BF403524 | similar to RIKEN cDNA 2010110K16 (predicted)                                      | RGD1305283_predicted                  | 1.123  | 0.590 | 1.225  | 0.961 | 1.561  | 0.039 | 1.541  | 0.266 |
| 1377964_at   | BM390539 | similar to RIKEN cDNA 2010200O16 (predicted)                                      | RGD1564454_predicted                  | 0.879  | 0.490 | 4.142  | 0.004 | 0.639  | 0.418 | 2.736  | 0.013 |
| 1393186_at   | BE117182 | similar to RIKEN cDNA 2010200O16 (predicted)                                      | RGD1564454_predicted                  | 0.789  | 0.900 | 0.993  | 0.334 | 0.746  | 0.070 | 0.930  | 0.221 |
| 1389228_at   | AI412292 | Similar to RIKEN cDNA 2010309E21 (predicted)                                      | RGD1304825_predicted                  | 0.898  | 0.359 | 2.348  | 0.013 | 0.637  | 0.009 | 1.821  | 0.033 |
| 1371965_at   | BF283269 | similar to RIKEN cDNA 2010311D03                                                  | RGD1303272                            | 0.648  | 0.296 | 0.519  | 0.004 | 0.506  | 0.059 | 0.673  | 0.003 |
| 1388542_at   | BI283120 | similar to RIKEN cDNA 2010315L10 (predicted) /// similar to 2010315L10Rik protein | RGD1306660_predicted ///<br>LOC292282 | 0.962  | 0.355 | 0.824  | 0.165 | 0.940  | 0.300 | 0.836  | 0.051 |
| 1383774_at   | BG376677 | similar to RIKEN cDNA 2010316F05 (predicted)                                      | RGD1308179_predicted                  | 0.355  | 0.005 | 0.773  | 0.106 | 0.421  | 0.009 | 0.580  | 0.116 |
| 1379475_at   | BF396403 | similar to RIKEN cDNA 2210009G21 (predicted)                                      | RGD1563120_predicted                  | 0.626  | 0.393 | 0.273  | 0.009 | 0.565  | 0.085 | 0.458  | 0.148 |
| 1373112_at   | BE110870 | Similar to RIKEN cDNA 2210010N04 gene                                             | RGD1306873                            | 1.582  | 0.147 | 0.965  | 0.621 | 1.300  | 0.966 | 0.949  | 0.718 |
| 1375656_at   | AI717725 | similar to RIKEN cDNA 2210010N04 gene                                             | RGD1306873                            | 1.096  | 0.875 | 1.376  | 0.280 | 2.149  | 0.083 | 1.033  | 0.860 |
| 1372535_at   | AI410203 | similar to RIKEN cDNA 2210012G02                                                  | LOC366431                             | 0.998  | 0.989 | 1.427  | 0.067 | 0.995  | 0.979 | 1.479  | 0.202 |
| 1372454_at   | BG378568 | similar to RIKEN cDNA 2210016L21 gene                                             | RGD1311899                            | 0.743  | 0.565 | 0.602  | 0.003 | 0.815  | 0.024 | 0.678  | 0.027 |
| 1389393_at   | AI232269 | similar to RIKEN cDNA 2210412D01                                                  | RGD1308210                            | 1.645  | 0.068 | 1.604  | 0.048 | 1.547  | 0.135 | 1.198  | 0.274 |
| 1373315_at   | AI176425 | Similar to RIKEN cDNA 2210412D01                                                  | RGD1308210                            | 0.681  | 0.107 | 0.872  | 0.904 | 0.468  | 0.002 | 0.833  | 0.512 |
| 1372604_at   | BI289459 | similar to RIKEN cDNA 2210421G13 (predicted)                                      | RGD1565597_predicted                  | 34.242 | 0.000 | 34.714 | 0.000 | 47.175 | 0.001 | 94.349 | 0.001 |
| 1397167_at   | AW534046 | Similar to RIKEN cDNA 2210421G13 (predicted)                                      | RGD1565356_predicted                  | 0.701  | 0.359 | 1.224  | 0.332 | 0.823  | 0.033 | 1.006  | 0.466 |
| 1374420_at   | BE117936 | similar to RIKEN cDNA 2310001A20                                                  | RGD1308874                            | 0.761  | 0.866 | 0.837  | 0.065 | 0.776  | 0.857 | 0.820  | 0.193 |
| 1390382_at   | BF414043 | similar to RIKEN cDNA 2310003F16 (predicted)                                      | RGD1311457_predicted                  | 0.886  | 0.827 | 1.540  | 0.012 | 0.621  | 0.024 | 1.001  | 0.058 |
| 1392960_at   | AI713860 | similar to RIKEN cDNA 2310004I24 gene                                             | RGD1309906                            | 0.769  | 0.758 | 1.362  | 0.021 | 0.999  | 0.997 | 1.076  | 0.599 |
| 1376379_a_at | AW252141 | similar to RIKEN cDNA 2310004I24 gene                                             | RGD1309906                            | 0.625  | 0.875 | 1.006  | 0.893 | 1.045  | 0.458 | 0.909  | 0.563 |
| 1373857_at   | BM387116 | Similar to RIKEN cDNA 2310005N03 gene                                             | RGD1309105_predicted                  | 0.304  | 0.094 | 0.363  | 0.005 | 0.345  | 0.024 | 0.487  | 0.088 |
| 1380821_a_at | AI072678 | Similar to RIKEN cDNA 2310005N03 gene                                             | RGD1309105_predicted                  | 0.834  | 0.429 | 0.665  | 0.037 | 1.207  | 0.921 | 0.722  | 0.293 |
| 1372823_at   | BE117126 | Similar to RIKEN cDNA 2310005N03 gene                                             | RGD1309105_predicted                  | 1.104  | 0.760 | 1.657  | 0.007 | 1.021  | 0.405 | 1.346  | 0.004 |
| 1388570_at   | AI232494 | similar to RIKEN cDNA 2310005O14                                                  | LOC498909                             | 0.552  | 0.012 | 0.820  | 0.539 | 0.476  | 0.030 | 0.902  | 0.415 |
| 1390491_at   | BM390772 | similar to RIKEN cDNA 2310005O14                                                  | LOC498909                             | 0.547  | 0.339 | 1.098  | 0.587 | 1.750  | 0.344 | 1.200  | 0.552 |
| 1393537_at   | AI060026 | Similar to RIKEN cDNA 2310005P05                                                  | RGD1307401                            | 1.513  | 0.883 | 0.973  | 0.769 | 0.733  | 0.387 | 0.800  | 0.058 |
| 1376985_at   | AA866482 | similar to RIKEN cDNA 2310007F12 (predicted)                                      | RGD1562416_predicted                  | 0.829  | 0.447 | 1.765  | 0.001 | 0.613  | 0.004 | 1.487  | 0.005 |
| 1372704_at   | BE098941 | similar to RIKEN cDNA 2310008M10 (predicted)                                      | RGD1560708_predicted                  | 0.708  | 0.238 | 0.836  | 0.014 | 0.618  | 0.071 | 0.774  | 0.043 |

|              |          |                                                                                               |                                                  |       |       |       |       |       |       |       |       |
|--------------|----------|-----------------------------------------------------------------------------------------------|--------------------------------------------------|-------|-------|-------|-------|-------|-------|-------|-------|
| 1373791_at   | BI289399 | similar to RIKEN cDNA 2310011J03                                                              | RGD1359127                                       | 0.824 | 0.822 | 0.919 | 0.456 | 0.578 | 0.067 | 1.438 | 0.026 |
| 1377194_a_at | BE107471 | similar to RIKEN cDNA 2310015N07                                                              | RGD1308637                                       | 1.205 | 0.118 | 1.539 | 0.018 | 1.180 | 0.135 | 1.523 | 0.004 |
| 1382590_at   | BI277914 | Similar to RIKEN cDNA 2310015N21 (predicted)                                                  | RGD1563347_predicted                             | 1.141 | 0.169 | 0.997 | 0.973 | 0.709 | 0.962 | 0.989 | 0.988 |
| 1393165_at   | BG377684 | similar to RIKEN cDNA 2310028N02                                                              | RGD1359339                                       | 0.359 | 0.021 | 0.585 | 0.015 | 0.318 | 0.003 | 0.488 | 0.010 |
| 1397714_at   | BF565706 | similar to RIKEN cDNA 2310035C23 (predicted)                                                  | RGD1307235_predicted                             | 1.905 | 0.010 | 0.991 | 0.810 | 1.549 | 0.054 | 1.118 | 0.634 |
| 1374253_at   | BI291355 | similar to RIKEN cDNA 2310035C23 (predicted)                                                  | RGD1307235_predicted                             | 0.712 | 0.197 | 0.551 | 0.007 | 1.490 | 0.926 | 0.897 | 0.055 |
| 1394925_at   | AI578037 | similar to RIKEN cDNA 2310035C23 (predicted)                                                  | RGD1307235_predicted                             | 1.222 | 0.282 | 1.242 | 0.941 | 1.941 | 0.021 | 0.993 | 0.781 |
| 1398952_at   | AI233222 | similar to RIKEN cDNA 2310036O22 (predicted) /// similar to RIKEN cDNA 2310036O22 (predicted) | RGD1564093_predicted ///<br>RGD1563295_predicted | 1.112 | 0.062 | 1.199 | 0.031 | 1.062 | 0.371 | 1.247 | 0.023 |
| 1388616_at   | AI233746 | similar to RIKEN cDNA 2310042G06                                                              | MGC72955                                         | 0.548 | 0.148 | 0.692 | 0.004 | 0.492 | 0.007 | 0.694 | 0.042 |
| 1399135_at   | BI290646 | similar to RIKEN cDNA 2310042P20                                                              | MGC94954                                         | 0.676 | 0.291 | 0.902 | 0.088 | 1.002 | 0.350 | 0.977 | 0.985 |
| 1382100_at   | AA997169 | similar to RIKEN cDNA 2310047O13 (predicted)                                                  | RGD1309605_predicted                             | 0.576 | 0.007 | 0.947 | 0.279 | 0.655 | 0.007 | 0.865 | 0.681 |
| 1372488_at   | BM386249 | similar to RIKEN cDNA 2310057D15                                                              | RGD1309016                                       | 0.930 | 0.995 | 2.535 | 0.040 | 0.831 | 0.992 | 1.366 | 0.179 |
| 1385208_at   | BF391430 | similar to RIKEN cDNA 2310057M21                                                              | RGD1305014                                       | 1.168 | 0.550 | 0.837 | 0.808 | 1.015 | 0.707 | 1.205 | 0.896 |
| 1391634_at   | BF552826 | similar to RIKEN cDNA 2310057N15 (predicted)                                                  | RGD1562078_predicted                             | 1.146 | 0.447 | 0.923 | 0.714 | 1.002 | 0.090 | 0.928 | 0.787 |
| 1372952_at   | BI291286 | similar to RIKEN cDNA 2310061F22                                                              | LOC292069                                        | 0.849 | 0.445 | 1.448 | 0.058 | 1.049 | 0.517 | 0.955 | 0.753 |
| 1372913_at   | AA849734 | similar to RIKEN cDNA 2310065K24                                                              | RGD1307433                                       | 1.493 | 0.014 | 1.347 | 0.011 | 3.001 | 0.006 | 1.440 | 0.220 |
| 1382490_at   | BF284288 | Similar to RIKEN cDNA 2310067G05                                                              | LOC301113                                        | 0.817 | 0.067 | 0.597 | 0.016 | 1.501 | 0.734 | 0.829 | 0.018 |
| 1379273_at   | BE109836 | similar to RIKEN cDNA 2310075A12                                                              | LOC300472                                        | 0.475 | 0.099 | 0.934 | 0.236 | 0.280 | 0.000 | 0.769 | 0.014 |
| 1395289_at   | H33428   | similar to RIKEN cDNA 2310075A12                                                              | LOC300472                                        | 0.479 | 0.139 | 0.788 | 0.853 | 0.525 | 0.036 | 0.475 | 0.116 |
| 1388412_at   | BI284376 | similar to RIKEN cDNA 2400003C14                                                              | RGD1307799                                       | 1.360 | 0.015 | 1.411 | 0.025 | 1.162 | 0.016 | 1.184 | 0.020 |
| 1374047_at   | BM390427 | similar to RIKEN cDNA 2400010D15                                                              | RGD1311805                                       | 0.694 | 0.210 | 0.663 | 0.022 | 0.968 | 0.173 | 1.026 | 0.462 |
| 1393009_at   | AI535126 | similar to RIKEN cDNA 2410002F23                                                              | RGD1309326                                       | 0.610 | 0.071 | 1.357 | 0.074 | 0.451 | 0.026 | 1.460 | 0.128 |
| 1385648_at   | AA956840 | Similar to RIKEN cDNA 2410002O22 gene                                                         | RGD1306583                                       | 1.917 | 0.013 | 1.555 | 0.026 | 0.562 | 0.114 | 0.646 | 0.042 |
| 1372547_at   | AI175034 | similar to RIKEN cDNA 2410002O22 gene                                                         | RGD1306583                                       | 0.634 | 0.100 | 0.953 | 0.639 | 0.608 | 0.012 | 0.919 | 0.379 |
| 1379795_at   | AA819224 | similar to RIKEN cDNA 2410002O22 gene                                                         | RGD1306583                                       | 0.439 | 0.170 | 0.649 | 0.139 | 0.864 | 0.879 | 0.606 | 0.286 |
| 1375918_at   | AW917662 | similar to RIKEN cDNA 2410003C20                                                              | LOC497967                                        | 0.636 | 0.275 | 0.851 | 0.574 | 0.397 | 0.073 | 0.906 | 0.852 |
| 1384105_at   | BE109571 | Similar to RIKEN cDNA 2410003C20                                                              | LOC497967                                        | 0.827 | 0.668 | 1.083 | 0.636 | 0.929 | 0.775 | 1.632 | 0.090 |
| 1374841_at   | AI237644 | similar to RIKEN cDNA 2410004B18 (predicted)                                                  | RGD1560065_predicted                             | 1.164 | 0.389 | 0.558 | 0.057 | 0.687 | 0.148 | 0.571 | 0.166 |
| 1384710_at   | BF403316 | similar to RIKEN cDNA 2410004F06 (predicted)                                                  | RGD1562792_predicted                             | 0.998 | 0.977 | 1.000 | 0.185 | 1.021 | 0.824 | 0.997 | 0.162 |
| 1374661_at   | AW524523 | similar to RIKEN cDNA 2410004H02                                                              | LOC361571                                        | 0.865 | 0.062 | 1.942 | 0.000 | 0.697 | 0.280 | 1.812 | 0.005 |
| 1389786_at   | AA946272 | Similar to RIKEN cDNA 2410005O16                                                              | LOC500419                                        | 1.222 | 0.598 | 0.801 | 0.424 | 1.797 | 0.051 | 0.999 | 0.479 |
| 1390967_a_at | AW919980 | similar to RIKEN cDNA 2410006F12                                                              | RGD1306841                                       | 0.690 | 0.997 | 2.533 | 0.011 | 0.936 | 0.124 | 1.569 | 0.065 |
| 1374848_at   | AI599867 | Similar to RIKEN cDNA 2410016F19 (predicted)                                                  | RGD1307434_predicted                             | 0.524 | 0.002 | 1.170 | 0.411 | 0.939 | 0.221 | 1.037 | 0.848 |
| 1384185_at   | BI289594 | similar to RIKEN cDNA 2410016O06 (predicted)                                                  | RGD1307704_predicted                             | 0.690 | 0.348 | 1.127 | 0.318 | 0.586 | 0.007 | 1.004 | 0.511 |
| 1373639_at   | BE115570 | similar to RIKEN cDNA 2410022L05 (predicted)                                                  | RGD1565675_predicted                             | 1.128 | 0.663 | 1.405 | 0.094 | 1.397 | 0.114 | 1.917 | 0.023 |
| 1379816_at   | AI502578 | Similar to RIKEN cDNA 2410025L10 (predicted)                                                  | RGD1563342_predicted                             | 1.082 | 0.468 | 0.622 | 0.007 | 3.234 | 0.034 | 0.825 | 0.276 |
| 1392491_at   | AI072533 | Similar to RIKEN cDNA 2410127L17                                                              | RGD1311863                                       | 0.843 | 0.040 | 0.786 | 0.512 | 0.933 | 0.623 | 1.155 | 0.542 |
| 1371461_at   | BF414239 | similar to RIKEN cDNA 2410166I05                                                              | RGD1305453                                       | 0.719 | 0.447 | 0.941 | 0.701 | 0.616 | 0.021 | 0.998 | 0.877 |
| 1390392_at   | BI301527 | similar to RIKEN cDNA 2500001K11 (predicted)                                                  | RGD1309602_predicted                             | 0.578 | 0.003 | 1.045 | 0.920 | 0.758 | 0.206 | 1.213 | 0.333 |
| 1398359_at   | AI008549 | similar to RIKEN cDNA 2500002L14; EST C77350                                                  | MGC94464                                         | 0.645 | 0.581 | 1.194 | 0.601 | 0.758 | 0.385 | 1.027 | 0.854 |
| 1371373_at   | AI010460 | similar to RIKEN cDNA 2500002L14; EST C77350                                                  | MGC94464                                         | 0.881 | 0.721 | 0.948 | 0.146 | 0.990 | 0.811 | 0.963 | 0.250 |
| 1384925_at   | AI045021 | Similar to RIKEN cDNA 2510005D08 (predicted)                                                  | RGD1306762_predicted                             | 0.718 | 0.020 | 0.704 | 0.180 | 0.496 | 0.040 | 0.653 | 0.360 |
| 1390098_at   | AA955687 | similar to RIKEN cDNA 2510005D08 (predicted)                                                  | RGD1306762_predicted                             | 0.728 | 0.724 | 0.840 | 0.402 | 0.808 | 0.027 | 0.656 | 0.769 |
| 1389682_at   | BF284967 | similar to RIKEN cDNA 2510006C20                                                              | RGD1309120                                       | 0.774 | 0.123 | 0.585 | 0.000 | 0.724 | 0.298 | 0.765 | 0.063 |
| 1374210_at   | BM383870 | similar to RIKEN cDNA 2510027N19                                                              | RGD1307760                                       | 1.672 | 0.213 | 1.939 | 0.060 | 1.753 | 0.014 | 1.892 | 0.051 |
| 1371654_at   | BF417252 | similar to RIKEN cDNA 2510039O18 (predicted)                                                  | RGD1305350_predicted                             | 0.658 | 0.051 | 0.975 | 0.883 | 0.512 | 0.032 | 1.110 | 0.052 |
| 1388508_at   | BM384233 | similar to RIKEN cDNA 2510049I19 (predicted)                                                  | RGD1561287_predicted                             | 0.595 | 0.193 | 1.376 | 0.174 | 0.761 | 0.015 | 1.274 | 0.834 |
| 1383779_at   | BF566806 | similar to RIKEN cDNA 2600005C20 (predicted)                                                  | RGD1305633_predicted                             | 1.164 | 0.985 | 0.895 | 0.481 | 0.805 | 0.226 | 1.003 | 0.947 |
| 1372549_at   | AI409460 | similar to RIKEN cDNA 2600017H02 (predicted)                                                  | RGD1561781_predicted                             | 0.881 | 0.053 | 0.997 | 0.844 | 0.775 | 0.008 | 1.000 | 0.990 |
| 1392923_at   | H34314   | Similar to RIKEN cDNA 2610001E06 (predicted)                                                  | RGD1308126_predicted                             | 1.415 | 0.021 | 0.749 | 0.001 | 0.736 | 0.215 | 0.544 | 0.035 |
| 1392562_at   | BM391400 | similar to RIKEN cDNA 2610001E06 (predicted)                                                  | RGD1308126_predicted                             | 1.179 | 0.127 | 1.731 | 0.014 | 0.995 | 0.856 | 0.888 | 0.322 |
| 1382436_at   | BM386497 | similar to RIKEN cDNA 2610002M06 (predicted)                                                  | RGD1566265_predicted                             | 1.396 | 0.138 | 2.925 | 0.006 | 1.821 | 0.100 | 3.364 | 0.004 |
| 1374124_at   | AA851397 | similar to RIKEN cDNA 2610003J06                                                              | RGD1307381                                       | 0.589 | 0.319 | 0.743 | 0.050 | 0.811 | 0.239 | 0.589 | 0.016 |
| 1379318_at   | BI296812 | Similar to RIKEN cDNA 2610019F03                                                              | LOC498662                                        | 0.912 | 0.514 | 1.004 | 0.988 | 0.873 | 0.357 | 1.000 | 0.987 |
| 1399130_at   | AW918690 | similar to RIKEN cDNA 2610022G08                                                              | LOC502782                                        | 0.276 | 0.025 | 0.421 | 0.104 | 0.351 | 0.007 | 0.236 | 0.053 |
| 1372543_at   | BI282107 | similar to RIKEN cDNA 2610029G23 (predicted)                                                  | RGD1562502_predicted                             | 1.177 | 0.919 | 1.547 | 0.021 | 0.879 | 0.150 | 1.636 | 0.002 |
| 1382186_a_at | AI136314 | similar to RIKEN cDNA 2610029K21                                                              | RGD1311086                                       | 0.214 | 0.010 | 5.225 | 0.005 | 0.202 | 0.001 | 5.488 | 0.006 |
| 1393128_at   | BI288424 | similar to RIKEN cDNA 2610029K21                                                              | RGD1311086                                       | 0.525 | 0.139 | 1.526 | 0.935 | 0.467 | 0.097 | 1.534 | 0.936 |
| 1382188_at   | BF397703 | similar to RIKEN cDNA 2610029K21                                                              | RGD1311086                                       | 0.813 | 0.645 | 1.382 | 0.454 | 0.821 | 0.253 | 1.235 | 0.196 |
| 1382187_at   | AI136314 | similar to RIKEN cDNA 2610029K21                                                              | RGD1311086                                       | 0.991 | 0.997 | 1.007 | 0.985 | 0.992 | 0.987 | 1.354 | 0.046 |

|              |          |                                                                                               |                          |       |       |       |       |       |       |       |       |
|--------------|----------|-----------------------------------------------------------------------------------------------|--------------------------|-------|-------|-------|-------|-------|-------|-------|-------|
| 1399009_at   | BE329028 | similar to RIKEN cDNA 2610034N24 (predicted)                                                  | RGD1305036_predicted     | 0.704 | 0.076 | 0.806 | 0.093 | 0.638 | 0.161 | 0.899 | 0.962 |
| 1381139_at   | BM387383 | Similar to RIKEN cDNA 2610039E05 (predicted)                                                  | RGD1560840_predicted     | 0.929 | 0.999 | 0.883 | 0.960 | 1.121 | 0.548 | 0.754 | 0.242 |
| 1378875_a_at | AW522817 | similar to RIKEN cDNA 2610110G12                                                              | RGD1303066               | 0.611 | 0.385 | 0.373 | 0.001 | 0.971 | 0.927 | 0.515 | 0.107 |
| 1391554_at   | BE113319 | Similar to RIKEN cDNA 2610110G12                                                              | RGD1303066               | 0.968 | 0.522 | 0.737 | 0.052 | 1.122 | 0.631 | 0.895 | 0.047 |
| 1396713_at   | BE121434 | Similar to RIKEN cDNA 2610110G12                                                              | RGD1303066               | 0.995 | 0.990 | 0.749 | 0.606 | 1.006 | 0.979 | 0.999 | 0.995 |
| 1372066_at   | AI170703 | similar to RIKEN cDNA 2610204K14                                                              | RGD1310022               | 0.874 | 0.208 | 1.250 | 0.361 | 0.543 | 0.272 | 1.243 | 0.088 |
| 1372185_at   | BF557934 | similar to RIKEN cDNA 2610205E22                                                              | RGD1306582               | 0.842 | 0.573 | 3.493 | 0.019 | 0.785 | 0.184 | 2.222 | 0.026 |
| 1397468_at   | BI288527 | similar to RIKEN cDNA 2610207I16                                                              | RGD1305387               | 0.831 | 0.147 | 0.938 | 0.754 | 1.506 | 0.097 | 0.782 | 0.867 |
| 1384244_at   | AA964752 | similar to RIKEN cDNA 2610207I16                                                              | RGD1305387               | 0.787 | 0.207 | 1.508 | 0.001 | 1.602 | 0.015 | 2.069 | 0.009 |
| 1372553_at   | AI233205 | similar to RIKEN cDNA 2610301B20; EST AI428449                                                | MGC94199                 | 0.764 | 0.012 | 0.641 | 0.028 | 0.735 | 0.304 | 0.763 | 0.025 |
| 1390146_at   | BF414998 | similar to RIKEN cDNA 2610318G18 (predicted)                                                  | RGD1306105_predicted     | 0.479 | 0.007 | 0.595 | 0.005 | 0.687 | 0.028 | 0.792 | 0.049 |
| 1399013_at   | AI412609 | similar to RIKEN cDNA 2610318K02 (predicted)                                                  | RGD1310905_predicted     | 0.833 | 0.466 | 1.231 | 0.147 | 0.771 | 0.007 | 1.149 | 0.102 |
| 1393451_at   | BI295149 | similar to RIKEN cDNA 2610510J17                                                              | RGD1310953               | 1.757 | 0.769 | 0.993 | 0.049 | 1.001 | 0.992 | 0.998 | 0.992 |
| 1383560_at   | BI303213 | Similar to RIKEN cDNA 2610528A15                                                              | RGD1305984               | 0.407 | 0.074 | 1.058 | 0.976 | 0.462 | 0.089 | 0.708 | 0.594 |
| 1389810_at   | BI275054 | similar to RIKEN cDNA 2610528A15                                                              | RGD1305984               | 0.466 | 0.107 | 1.101 | 0.486 | 0.945 | 0.790 | 1.367 | 0.060 |
| 1374478_at   | AA819329 | similar to RIKEN cDNA 2610528J11 (predicted)                                                  | RGD1305347_predicted     | 0.435 | 0.027 | 0.515 | 0.024 | 0.283 | 0.013 | 0.375 | 0.014 |
| 1373074_at   | AI171367 | similar to RIKEN cDNA 2700002I20                                                              | RGD1307279               | 0.495 | 0.836 | 0.954 | 0.780 | 0.949 | 0.845 | 1.169 | 0.095 |
| 1381118_at   | AW526652 | similar to RIKEN cDNA 2700007P21                                                              | RGD1311463               | 0.350 | 0.002 | 0.485 | 0.067 | 0.408 | 0.013 | 0.407 | 0.064 |
| 1392967_at   | BF550692 | similar to RIKEN cDNA 2700062C07                                                              | MGC116121                | 0.702 | 0.013 | 0.525 | 0.006 | 0.863 | 0.985 | 0.653 | 0.016 |
| 1376638_at   | BI288798 | similar to RIKEN cDNA 2700067D09                                                              | RGD1305833               | 0.914 | 0.422 | 0.738 | 0.021 | 1.007 | 0.581 | 0.910 | 0.012 |
| 1374321_at   | AI227598 | Similar to RIKEN cDNA 2700081O15 (predicted)                                                  | RGD1560108_predicted     | 1.033 | 0.205 | 0.554 | 0.025 | 1.674 | 0.114 | 0.880 | 0.449 |
| 1374430_at   | BI274617 | similar to RIKEN cDNA 2700085E05                                                              | RGD1307010               | 0.665 | 0.322 | 0.954 | 0.366 | 0.754 | 0.045 | 0.939 | 0.164 |
| 1390284_at   | BM383683 | Similar to RIKEN cDNA 2700091N06 (predicted)                                                  | RGD1310710_predicted     | 0.887 | 0.467 | 1.063 | 0.851 | 0.833 | 0.176 | 0.981 | 0.876 |
| 1398374_at   | BE101274 | similar to RIKEN cDNA 2810002D13 gene                                                         | RGD1307128               | 0.994 | 0.935 | 0.729 | 0.136 | 0.745 | 0.074 | 0.695 | 0.191 |
| 1372265_at   | AI172218 | similar to RIKEN cDNA 2810002N01                                                              | RGD1304719               | 0.631 | 0.187 | 0.815 | 0.114 | 0.456 | 0.026 | 0.902 | 0.495 |
| 1375701_at   | BF400575 | similar to RIKEN cDNA 2810013M15                                                              | LOC360568                | 1.895 | 0.058 | 1.201 | 0.246 | 1.547 | 0.020 | 0.709 | 0.051 |
| 1376201_at   | AI070397 | similar to RIKEN cDNA 2810013M15                                                              | LOC360568                | 1.125 | 0.992 | 0.776 | 0.323 | 1.001 | 0.988 | 0.997 | 0.214 |
| 1373413_at   | AW531093 | similar to RIKEN cDNA 2810021O14 (predicted)                                                  | RGD1310481_predicted     | 0.870 | 0.872 | 0.778 | 0.080 | 0.991 | 0.681 | 0.846 | 0.294 |
| 1395336_at   | BE098691 | similar to RIKEN cDNA 2810022L02                                                              | LOC501207                | 1.018 | 0.700 | 1.003 | 0.935 | 1.016 | 0.946 | 0.999 | 0.989 |
| 1373946_at   | AI409943 | similar to RIKEN cDNA 2810037C14                                                              | RGD1305915               | 0.957 | 0.938 | 1.233 | 0.441 | 0.838 | 0.510 | 1.062 | 0.217 |
| 1392928_at   | AA891693 | similar to RIKEN cDNA 2810055F11 (predicted)                                                  | RGD1305721_predicted     | 0.829 | 0.883 | 1.107 | 0.046 | 1.144 | 0.065 | 1.504 | 0.067 |
| 1373474_at   | BE115948 | similar to RIKEN cDNA 2810403A07                                                              | RGD1565775               | 0.928 | 0.066 | 0.964 | 0.946 | 1.140 | 0.797 | 1.061 | 0.336 |
| 1395535_at   | BF548555 | similar to RIKEN cDNA 2810405J04                                                              | RGD1305486               | 1.078 | 0.266 | 1.002 | 0.946 | 1.328 | 0.049 | 1.000 | 0.997 |
| 1373870_at   | BE110630 | similar to RIKEN cDNA 2810405J04                                                              | RGD1305486               | 0.757 | 0.356 | 0.793 | 0.082 | 0.742 | 0.026 | 0.870 | 0.356 |
| 1397077_at   | BF410515 | Similar to RIKEN cDNA 2810409H07                                                              | RGD1307982               | 0.990 | 0.670 | 1.110 | 0.959 | 0.998 | 0.877 | 1.093 | 0.965 |
| 1388645_at   | AI175494 | similar to RIKEN cDNA 2810409H07                                                              | RGD1307982               | 0.969 | 0.861 | 1.558 | 0.001 | 1.219 | 0.064 | 2.103 | 0.000 |
| 1383891_a_at | AA997097 | similar to RIKEN cDNA 2810417J12 gene (predicted)                                             | RGD1311166_predicted     | 1.179 | 0.541 | 1.394 | 0.098 | 1.003 | 0.298 | 1.466 | 0.093 |
| 1379337_at   | BI284334 | similar to RIKEN cDNA 2810421I24                                                              | RGD1307883               | 1.065 | 0.562 | 2.441 | 0.053 | 0.731 | 0.054 | 2.715 | 0.097 |
| 1372108_at   | BE098359 | similar to RIKEN cDNA 2810422B04                                                              | LOC500199                | 0.418 | 0.042 | 0.751 | 0.587 | 0.840 | 0.035 | 0.710 | 0.463 |
| 1393834_at   | BF402667 | Similar to RIKEN cDNA 2810426N06 (predicted)                                                  | RGD1562094_predicted     | 1.356 | 0.079 | 0.951 | 0.568 | 2.932 | 0.016 | 1.370 | 0.529 |
| 1392956_at   | BG373315 | Similar to RIKEN cDNA 2810443J12 (predicted)                                                  | RGD1304868_predicted     | 0.961 | 0.798 | 0.711 | 0.813 | 0.759 | 0.325 | 1.457 | 0.069 |
| 1373198_at   | BF283018 | similar to RIKEN cDNA 2810451A06                                                              | RGD1311098               | 0.482 | 0.347 | 1.022 | 0.874 | 0.350 | 0.024 | 0.723 | 0.733 |
| 1373688_at   | AA849532 | similar to RIKEN cDNA 2810453I06                                                              | LOC498145                | 0.663 | 0.003 | 1.304 | 0.445 | 0.845 | 0.291 | 1.005 | 0.358 |
| 1378399_at   | BE111635 | similar to RIKEN cDNA 2810453I06                                                              | LOC498145                | 0.706 | 0.181 | 1.350 | 0.214 | 0.758 | 0.099 | 1.156 | 0.558 |
| 1379284_at   | AI411760 | similar to RIKEN cDNA 2810457I06 (predicted)                                                  | RGD1310357_predicted     | 0.995 | 0.696 | 1.334 | 0.062 | 0.999 | 0.984 | 1.064 | 0.016 |
| 1377703_at   | AA819694 | similar to RIKEN cDNA 2900009I07                                                              | RGD1310316               | 0.769 | 0.854 | 0.903 | 0.591 | 0.526 | 0.059 | 0.916 | 0.343 |
| 1373100_at   | BI288811 | similar to RIKEN cDNA 2900010J23                                                              | LOC499779                | 0.802 | 0.217 | 0.706 | 0.058 | 0.701 | 0.193 | 0.652 | 0.103 |
| 1380750_at   | BF398240 | Similar to RIKEN cDNA 2900010J23                                                              | LOC499779                | 0.646 | 0.951 | 0.727 | 0.060 | 0.840 | 0.828 | 0.649 | 0.020 |
| 1397901_at   | BI298378 | Similar to RIKEN cDNA 2900010J23 (predicted)                                                  | RGD1561465_predicted     | 1.064 | 0.317 | 0.858 | 0.124 | 0.616 | 0.109 | 0.723 | 0.198 |
| 1389033_at   | AW918775 | similar to RIKEN cDNA 2900010M23 (predicted)                                                  | RGD1306917_predicted     | 1.011 | 0.948 | 1.264 | 0.877 | 0.756 | 0.091 | 1.211 | 0.839 |
| 1392294_at   | BE119402 | Similar to RIKEN cDNA 2900016D05                                                              | LOC501285                | 1.188 | 0.883 | 1.077 | 0.718 | 1.113 | 0.077 | 1.048 | 0.802 |
| 1383128_at   | AW921382 | similar to RIKEN cDNA 2900024C23 (predicted)                                                  | RGD1308581_predicted     | 1.133 | 0.987 | 0.705 | 0.249 | 0.940 | 0.629 | 1.344 | 0.813 |
| 1397628_at   | BM390965 | similar to RIKEN cDNA 2900092E17                                                              | RGD1305592               | 1.734 | 0.176 | 1.775 | 0.137 | 1.289 | 0.479 | 2.167 | 0.076 |
| 1381765_at   | AI137388 | Similar to RIKEN cDNA 3010027G13                                                              | RGD1306193               | 0.779 | 0.086 | 1.081 | 0.480 | 0.625 | 0.014 | 1.006 | 0.920 |
| 1375146_at   | BI282168 | similar to RIKEN cDNA 3010027G13                                                              | RGD1306193               | 0.764 | 0.165 | 1.101 | 0.151 | 0.668 | 0.009 | 1.051 | 0.180 |
| 1371502_at   | AI103666 | similar to RIKEN cDNA 3100004P22                                                              | RGD1306184               | 0.730 | 0.368 | 0.890 | 0.365 | 0.822 | 0.204 | 0.832 | 0.443 |
| 1367483_at   | AI170657 | similar to RIKEN cDNA 3110001D03 (predicted)                                                  | RGD1309148_predicted     | 0.944 | 0.328 | 1.138 | 0.269 | 1.157 | 0.061 | 1.156 | 0.177 |
|              |          |                                                                                               | RGD1561986_predicted /// |       |       |       |       |       |       |       |       |
| 1380619_at   | AI177390 | similar to RIKEN cDNA 3110001I22 (predicted) /// similar to RIKEN cDNA 3110001I22 (predicted) | RGD1565661_predicted     | 1.194 | 0.093 | 1.404 | 0.004 | 1.433 | 0.002 | 2.245 | 0.011 |
| 1371424_at   | BG378621 | similar to RIKEN cDNA 3110005O21                                                              | RGD1304823               | 1.281 | 0.518 | 1.021 | 0.475 | 0.968 | 0.763 | 1.021 | 0.368 |
| 1396891_at   | AW533248 | Similar to RIKEN cDNA 3110007P09 (predicted)                                                  | RGD1564957_predicted     | 0.686 | 0.430 | 1.526 | 0.205 | 0.630 | 0.419 | 1.238 | 0.397 |

|              |          |                                                                                            |                         |       |       |       |       |       |       |       |       |
|--------------|----------|--------------------------------------------------------------------------------------------|-------------------------|-------|-------|-------|-------|-------|-------|-------|-------|
| 1389231_at   | BI296728 | similar to RIKEN cDNA 3110007P09 (predicted)                                               | RGD1564957_predicted    | 1.010 | 0.852 | 0.998 | 0.124 | 1.013 | 0.994 | 1.147 | 0.680 |
| 1397708_at   | BI289555 | similar to RIKEN cDNA 3110009E18                                                           | LOC288978               | 0.507 | 0.037 | 0.696 | 0.035 | 0.601 | 0.042 | 0.550 | 0.020 |
| 1375816_at   | BI296706 | Similar to RIKEN cDNA 3110009E18                                                           | LOC288978               | 1.540 | 0.518 | 1.333 | 0.615 | 1.479 | 0.786 | 0.880 | 0.442 |
| 1379793_at   | AW535749 | similar to RIKEN cDNA 3110031B13                                                           | RGD1305356              | 0.963 | 0.084 | 0.956 | 0.789 | 0.958 | 0.627 | 0.843 | 0.053 |
| 1388775_at   | AI176439 | similar to RIKEN cDNA 3110031B13                                                           | RGD1305356              | 1.012 | 0.414 | 0.470 | 0.000 | 0.582 | 0.408 | 0.600 | 0.001 |
| 1379425_at   | AI549208 | similar to RIKEN cDNA 3110037I16 (predicted)                                               | RGD1309802_predicted    | 1.710 | 0.669 | 0.968 | 0.780 | 0.998 | 0.303 | 0.959 | 0.308 |
| 1373833_at   | BI288945 | similar to RIKEN cDNA 3110040N11                                                           | RGD1305713              | 1.131 | 0.274 | 0.671 | 0.055 | 0.998 | 0.961 | 0.472 | 0.057 |
| 1390144_at   | BF411622 | similar to RIKEN cDNA 3110043O21                                                           | RGD1359108              | 0.518 | 0.269 | 1.373 | 0.036 | 0.608 | 0.407 | 0.963 | 0.768 |
| 1388996_at   | AI406527 | similar to RIKEN cDNA 3110052N05                                                           | RGD1308579              | 0.513 | 0.122 | 0.311 | 0.003 | 0.668 | 0.068 | 0.339 | 0.010 |
| 1372072_at   | BI282268 | similar to RIKEN cDNA 3110052N05                                                           | RGD1308579              | 0.931 | 0.340 | 0.707 | 0.153 | 0.755 | 0.181 | 0.772 | 0.573 |
| 1395503_at   | BF564382 | similar to RIKEN cDNA 3230401I01 (predicted)                                               | RGD1307904_predicted    | 1.171 | 0.901 | 1.064 | 0.514 | 0.998 | 0.986 | 1.048 | 0.443 |
| 1377848_at   | AW535219 | similar to RIKEN cDNA 3830405G04                                                           | RGD1305287              | 0.353 | 0.007 | 0.271 | 0.008 | 0.517 | 0.047 | 0.381 | 0.007 |
| 1398968_at   | AI168979 | Similar to RIKEN cDNA 3930401K13                                                           | RGD1309459              | 0.722 | 0.949 | 0.666 | 0.002 | 0.910 | 0.111 | 0.614 | 0.083 |
| 1376028_at   | BI285463 | similar to RIKEN cDNA 4121402D02 (predicted)                                               | RGD1564778_predicted    | 0.952 | 0.315 | 0.912 | 0.230 | 1.066 | 0.656 | 0.841 | 0.287 |
| 1389917_at   | BF284375 | Similar to RIKEN cDNA 4121402D02 (predicted)                                               | RGD1564778_predicted    | 1.003 | 0.711 | 0.999 | 0.979 | 1.000 | 0.114 | 1.000 | 0.984 |
| 1372169_at   | BE108809 | similar to RIKEN cDNA 4121402D02 (predicted)                                               | RGD1564778_predicted    | 1.055 | 0.810 | 0.866 | 0.027 | 0.939 | 0.023 | 0.781 | 0.066 |
| 1373390_at   | AI178783 | similar to RIKEN cDNA 4121402D02 (predicted)                                               | RGD1564778_predicted    | 0.967 | 0.810 | 0.875 | 0.851 | 1.075 | 0.781 | 0.801 | 0.337 |
| 1399118_at   | AI168933 | similar to RIKEN cDNA 4121402D02 (predicted)                                               | RGD1564778_predicted    | 1.363 | 0.865 | 2.083 | 0.009 | 1.397 | 0.879 | 1.345 | 0.066 |
| 1383307_at   | AI717533 | similar to RIKEN cDNA 4432406C05                                                           | MGC114379               | 0.650 | 0.261 | 0.576 | 0.004 | 0.496 | 0.037 | 0.653 | 0.019 |
| 1397410_at   | BI301687 | Similar to RIKEN cDNA 4631427C17 (predicted)                                               | RGD1564895_predicted    | 1.070 | 0.763 | 0.475 | 0.002 | 0.831 | 0.825 | 0.484 | 0.019 |
| 1388637_at   | AI579376 | similar to RIKEN cDNA 4632411B12                                                           | RGD1309220              | 0.921 | 0.798 | 1.515 | 0.068 | 0.933 | 0.102 | 1.095 | 0.060 |
| 1374441_at   | AI180035 | similar to RIKEN cDNA 4633402N23 gene                                                      | RGD1306649              | 0.574 | 0.234 | 0.869 | 0.460 | 0.297 | 0.003 | 1.143 | 0.556 |
| 1375548_at   | BI296537 | similar to RIKEN cDNA 4732418C07 (predicted)                                               | RGD1310351_predicted    | 0.640 | 0.329 | 0.576 | 0.009 | 0.898 | 0.455 | 0.596 | 0.003 |
| 1378962_at   | BM385701 | similar to RIKEN cDNA 4732496G21 gene                                                      | RGD1309655              | 1.362 | 0.194 | 1.112 | 0.049 | 1.619 | 0.339 | 0.960 | 0.312 |
| 1385204_at   | AI639503 | similar to RIKEN cDNA 4833418A01 (predicted)                                               | RGD1565551_predicted    | 1.002 | 0.994 | 0.804 | 0.806 | 0.999 | 0.969 | 1.148 | 0.271 |
| 1379422_at   | AI145871 | similar to RIKEN cDNA 4833435D08 /// similar to glycosyltransferase 28 domain containing 1 | LOC300284 /// LOC367759 | 0.869 | 0.175 | 0.467 | 0.015 | 0.893 | 0.599 | 0.480 | 0.031 |
| 1393369_at   | BI300502 | Similar to RIKEN cDNA 4921511I16                                                           | RGD1305302              | 1.860 | 0.015 | 0.854 | 0.010 | 1.321 | 0.101 | 0.870 | 0.252 |
| 1383617_at   | BF401603 | similar to RIKEN cDNA 4921511I16                                                           | RGD1305302              | 1.097 | 0.055 | 1.079 | 0.288 | 1.219 | 0.049 | 1.391 | 0.191 |
| 1388625_at   | BM390149 | similar to RIKEN cDNA 4921521J11 (predicted)                                               | RGD1304711_predicted    | 0.750 | 0.012 | 0.858 | 0.089 | 1.177 | 0.329 | 1.016 | 0.144 |
| 1377644_at   | BF284809 | similar to RIKEN cDNA 4921524J17 (predicted)                                               | RGD1308706_predicted    | 1.609 | 0.218 | 2.325 | 0.007 | 1.340 | 0.058 | 2.725 | 0.003 |
| 1389296_at   | AI104356 | similar to RIKEN cDNA 4921531G14 (predicted)                                               | RGD1310430_predicted    | 0.620 | 0.036 | 1.172 | 0.314 | 0.530 | 0.071 | 0.966 | 0.697 |
| 1390875_a_at | BF290046 | similar to RIKEN cDNA 4921537D05                                                           | RGD1359593              | 1.637 | 0.011 | 2.035 | 0.044 | 3.316 | 0.012 | 1.929 | 0.012 |
| 1377855_at   | BE111774 | similar to RIKEN cDNA 4921537D05                                                           | RGD1359593              | 1.479 | 0.121 | 0.988 | 0.603 | 2.252 | 0.056 | 1.229 | 0.350 |
| 1376668_at   | BM388328 | similar to RIKEN cDNA 4922503N01 (predicted)                                               | RGD1311126_predicted    | 0.973 | 0.937 | 0.755 | 0.083 | 0.669 | 0.912 | 0.831 | 0.365 |
| 1389300_at   | AI410415 | similar to RIKEN cDNA 4930404J24 (predicted)                                               | RGD1563498_predicted    | 0.979 | 0.899 | 1.475 | 0.057 | 0.621 | 0.112 | 1.464 | 0.067 |
| 1372378_at   | BE111729 | similar to RIKEN cDNA 4930429A22 (predicted)                                               | RGD1560168_predicted    | 0.771 | 0.148 | 1.038 | 0.647 | 0.838 | 0.034 | 1.056 | 0.708 |
| 1394095_at   | AA850714 | similar to RIKEN cDNA 4930429M06Rik                                                        | RGD1307449              | 1.060 | 0.759 | 1.969 | 0.147 | 0.556 | 0.268 | 0.981 | 0.999 |
| 1391115_at   | BM390642 | similar to RIKEN cDNA 4930429O20                                                           | LOC498229               | 0.997 | 0.980 | 1.021 | 0.924 | 1.006 | 0.955 | 0.995 | 0.979 |
| 1384431_at   | AI070150 | Similar to RIKEN cDNA 4930431B11 gene                                                      | RGD1308555              | 2.446 | 0.038 | 4.261 | 0.004 | 1.639 | 0.026 | 5.491 | 0.009 |
| 1377053_at   | BE117757 | similar to RIKEN cDNA 4930444A02                                                           | RGD1310810              | 0.346 | 0.001 | 0.376 | 0.008 | 0.412 | 0.000 | 0.567 | 0.004 |
| 1382813_at   | BG377386 | similar to RIKEN cDNA 4930444A02                                                           | RGD1310810              | 0.445 | 0.028 | 0.374 | 0.003 | 0.560 | 0.031 | 0.438 | 0.022 |
| 1390913_at   | AW435463 | similar to RIKEN cDNA 4930506L13 (predicted)                                               | RGD1308890_predicted    | 0.666 | 0.118 | 0.802 | 0.155 | 0.489 | 0.119 | 1.044 | 0.236 |
| 1378220_at   | AI111983 | similar to RIKEN cDNA 4930517K11                                                           | LOC497860               | 1.290 | 0.640 | 1.258 | 0.279 | 1.551 | 0.352 | 1.232 | 0.071 |
| 1382115_at   | BE099174 | similar to RIKEN cDNA 4930521E07 (predicted)                                               | RGD1305166_predicted    | 0.520 | 0.039 | 0.448 | 0.009 | 0.516 | 0.261 | 0.396 | 0.101 |
| 1374980_at   | BI282049 | similar to RIKEN cDNA 4930527D15                                                           | RGD1307598              | 0.851 | 0.180 | 1.384 | 0.044 | 1.206 | 0.592 | 1.154 | 0.593 |
| 1388633_at   | BM388921 | similar to RIKEN cDNA 4930538D17                                                           | RGD1309313              | 0.607 | 0.090 | 0.638 | 0.016 | 0.814 | 0.074 | 0.701 | 0.027 |
| 1393464_at   | BM383378 | similar to RIKEN cDNA 4930550C14                                                           | RGD1311251              | 0.667 | 0.588 | 0.502 | 0.038 | 1.007 | 0.884 | 0.443 | 0.866 |
| 1374856_at   | BF396478 | similar to RIKEN cDNA 4930556P03 (predicted)                                               | RGD1306433_predicted    | 1.078 | 0.856 | 1.215 | 0.090 | 1.056 | 0.810 | 1.354 | 0.067 |
| 1373613_at   | AI408827 | similar to RIKEN cDNA 4930570C03                                                           | LOC300191               | 0.968 | 0.417 | 0.998 | 0.983 | 0.968 | 0.669 | 1.025 | 0.075 |
| 1396737_at   | BF403249 | similar to RIKEN cDNA 4931400A14 (predicted)                                               | RGD1307234_predicted    | 1.007 | 0.857 | 1.536 | 0.044 | 0.992 | 0.249 | 0.996 | 0.802 |
| 1371763_at   | BI274533 | similar to RIKEN cDNA 4931406C07                                                           | RGD1309534              | 0.270 | 0.027 | 0.218 | 0.001 | 0.175 | 0.004 | 0.267 | 0.011 |
| 1381305_at   | BM383011 | similar to RIKEN cDNA 4931406P16 (predicted)                                               | RGD1308428_predicted    | 1.051 | 0.511 | 0.570 | 0.030 | 1.223 | 0.172 | 1.113 | 0.536 |
| 1392586_at   | AI704512 | similar to RIKEN cDNA 4932432K03                                                           | RGD1308087              | 0.878 | 0.392 | 0.816 | 0.287 | 1.134 | 0.094 | 0.921 | 0.896 |
| 1373123_at   | BG372671 | similar to RIKEN cDNA 4932432N11 gene (predicted)                                          | RGD1310671_predicted    | 0.711 | 0.214 | 0.763 | 0.071 | 0.820 | 0.332 | 0.857 | 0.065 |
| 1372063_at   | BG377807 | Similar to RIKEN cDNA 4933402P03                                                           | LOC497938               | 0.736 | 0.456 | 0.513 | 0.010 | 1.163 | 0.963 | 0.575 | 0.065 |
| 1380261_at   | BE328914 | Similar to RIKEN cDNA 4933404M02                                                           | LOC499806               | 1.062 | 0.401 | 0.999 | 0.993 | 1.340 | 0.017 | 0.983 | 0.955 |
| 1393919_at   | AW535116 | similar to RIKEN cDNA 4933405A16                                                           | RGD1305778              | 2.612 | 0.078 | 5.531 | 0.024 | 3.667 | 0.009 | 3.969 | 0.003 |
| 1381888_x_at | AA848451 | Similar to RIKEN cDNA 4933428G09 (predicted)                                               | RGD1311045_predicted    | 1.028 | 0.772 | 1.304 | 0.076 | 1.375 | 0.441 | 1.082 | 0.605 |
| 1389269_at   | BI285251 | similar to RIKEN cDNA 4933433P14 gene                                                      | RGD1308470              | 0.942 | 0.543 | 1.090 | 0.663 | 1.031 | 0.042 | 1.316 | 0.149 |
| 1377613_at   | BF403784 | similar to RIKEN cDNA 5031400M07                                                           | RGD1307343              | 0.847 | 0.290 | 1.074 | 0.114 | 0.810 | 0.376 | 1.022 | 0.172 |
| 1386287_at   | AI407974 | similar to RIKEN cDNA 5033405K12 (predicted)                                               | RGD1311593_predicted    | 2.468 | 0.034 | 6.674 | 0.003 | 1.832 | 0.033 | 6.194 | 0.004 |

|              |          |                                                                                                                                                                                                                                                                    |                                                                                                                                 |       |       |        |       |        |       |        |       |
|--------------|----------|--------------------------------------------------------------------------------------------------------------------------------------------------------------------------------------------------------------------------------------------------------------------|---------------------------------------------------------------------------------------------------------------------------------|-------|-------|--------|-------|--------|-------|--------|-------|
| 1380032_at   | BF407634 | similar to RIKEN cDNA 5033405K12 (predicted)                                                                                                                                                                                                                       | RGD1311593_predicted                                                                                                            | 1.113 | 0.241 | 3.085  | 0.052 | 1.109  | 0.354 | 3.245  | 0.423 |
| 1373186_at   | AI176617 | similar to RIKEN cDNA 5033405K12 (predicted)                                                                                                                                                                                                                       | RGD1311593_predicted                                                                                                            | 0.946 | 0.443 | 0.901  | 0.060 | 1.037  | 0.334 | 0.991  | 0.263 |
| 1389444_at   | AI179665 | Similar to RIKEN cDNA 5033406L14                                                                                                                                                                                                                                   | RGD1305755                                                                                                                      | 1.330 | 0.115 | 0.687  | 0.073 | 1.255  | 0.695 | 0.687  | 0.070 |
| 1390802_at   | AI170769 | similar to RIKEN cDNA 5033414D02 (predicted)                                                                                                                                                                                                                       | RGD1306839_predicted                                                                                                            | 0.447 | 0.524 | 1.204  | 0.329 | 0.507  | 0.141 | 1.078  | 0.147 |
| 1395440_at   | AW915843 | similar to RIKEN cDNA 5133401N09                                                                                                                                                                                                                                   | MGC125086                                                                                                                       | 1.005 | 0.981 | 1.004  | 0.966 | 0.998  | 0.974 | 1.001  | 0.996 |
| 1371941_at   | AI411390 | similar to RIKEN cDNA 5230400G24                                                                                                                                                                                                                                   | RGD1310230                                                                                                                      | 0.778 | 0.223 | 0.791  | 0.021 | 0.739  | 0.011 | 0.732  | 0.052 |
| 1375024_at   | AI410336 | similar to RIKEN cDNA 5230400J09 (predicted)                                                                                                                                                                                                                       | RGD1559623_predicted                                                                                                            | 1.007 | 0.265 | 0.933  | 0.499 | 0.925  | 0.387 | 1.634  | 0.021 |
| 1382987_at   | AA874945 | Similar to RIKEN cDNA 5330414D10 (predicted)                                                                                                                                                                                                                       | RGD1307986_predicted                                                                                                            | 3.857 | 0.492 | 1.083  | 0.735 | 2.381  | 0.193 | 0.910  | 0.229 |
| 1384970_at   | BM389861 | similar to RIKEN cDNA 5330437I02 gene (predicted)                                                                                                                                                                                                                  | RGD1565246_predicted                                                                                                            | 0.999 | 0.773 | 0.997  | 0.986 | 1.004  | 0.962 | 1.000  | 0.994 |
| 1367542_at   | AI411793 | similar to RIKEN cDNA 5330440M15 /// similar to hypothetical protein SP192 (predicted) /// similar to 5330440M15Rik protein /// similar to 5330440M15Rik protein (predicted) /// similar to 5330440M15Rik protein /// similar to 5330440M15Rik protein (predicted) | LOC313519 ///<br>RGD1564280_predicted ///<br>LOC498424 ///<br>RGD1563081_predicted ///<br>LOC499711 ///<br>RGD1563632_predicted | 1.294 | 0.050 | 1.289  | 0.098 | 1.097  | 0.221 | 1.395  | 0.045 |
| 1372152_at   | BI275874 | similar to RIKEN cDNA 5430428G01 /// similar to RIKEN cDNA 5430428G01                                                                                                                                                                                              | RGD1312003 ///<br>LOC499699                                                                                                     | 0.783 | 0.547 | 0.738  | 0.076 | 0.762  | 0.283 | 1.258  | 0.212 |
| 1371992_at   | BG378110 | similar to RIKEN cDNA 5430437P03                                                                                                                                                                                                                                   | MGC94542                                                                                                                        | 0.948 | 0.172 | 1.380  | 0.021 | 1.573  | 0.205 | 1.417  | 0.012 |
| 1385681_at   | BG668520 | similar to RIKEN cDNA 5430437P03                                                                                                                                                                                                                                   | MGC94542                                                                                                                        | 1.061 | 0.886 | 1.034  | 0.041 | 1.000  | 0.954 | 1.004  | 0.983 |
| 1389472_at   | AI169015 | Similar to RIKEN cDNA 5630401D24 (predicted)                                                                                                                                                                                                                       | RGD1311526_predicted                                                                                                            | 0.824 | 0.338 | 1.495  | 0.003 | 0.592  | 0.019 | 1.508  | 0.002 |
| 1393510_at   | AW524463 | similar to RIKEN cDNA 5730410E15 gene (predicted)                                                                                                                                                                                                                  | RGD1564335_predicted                                                                                                            | 1.203 | 0.314 | 3.747  | 0.054 | 1.571  | 0.026 | 2.996  | 0.092 |
| 1376793_at   | BF397794 | similar to RIKEN cDNA 5730414C17 (predicted)                                                                                                                                                                                                                       | RGD1308377_predicted                                                                                                            | 0.877 | 0.929 | 0.687  | 0.004 | 0.873  | 0.593 | 0.986  | 0.068 |
| 1389708_at   | AW142960 | similar to RIKEN cDNA 5730421E18                                                                                                                                                                                                                                   | RGD1310006                                                                                                                      | 0.554 | 0.060 | 0.901  | 0.822 | 0.626  | 0.148 | 1.226  | 0.363 |
| 1373846_at   | BF408064 | similar to RIKEN cDNA 5730434I03 gene (predicted)                                                                                                                                                                                                                  | RGD1311774_predicted                                                                                                            | 0.777 | 0.127 | 0.789  | 0.020 | 0.659  | 0.000 | 0.763  | 0.005 |
| 1373848_at   | BM388575 | similar to RIKEN cDNA 5730449L18 (predicted)                                                                                                                                                                                                                       | RGD1308584_predicted                                                                                                            | 0.828 | 0.483 | 1.237  | 0.677 | 0.618  | 0.076 | 1.297  | 0.565 |
| 1383141_a_at | AI236700 | similar to RIKEN cDNA 5730453I16                                                                                                                                                                                                                                   | RGD1305441                                                                                                                      | 1.234 | 0.000 | 1.116  | 0.680 | 1.309  | 0.034 | 1.127  | 0.819 |
| 1390729_x_at | BM391768 | similar to RIKEN cDNA 5730453I16                                                                                                                                                                                                                                   | RGD1305441                                                                                                                      | 0.924 | 0.515 | 1.442  | 0.001 | 1.310  | 0.193 | 1.097  | 0.418 |
| 1377496_at   | BM391768 | similar to RIKEN cDNA 5730453I16                                                                                                                                                                                                                                   | RGD1305441                                                                                                                      | 1.102 | 0.697 | 2.185  | 0.009 | 1.081  | 0.407 | 1.609  | 0.219 |
| 1375590_at   | AA894335 | similar to RIKEN cDNA 5730454B08 (predicted)                                                                                                                                                                                                                       | RGD1308290_predicted                                                                                                            | 1.004 | 0.964 | 1.335  | 0.004 | 1.066  | 0.257 | 1.001  | 0.994 |
| 1393583_at   | BE119096 | similar to RIKEN cDNA 5730466H23 (predicted)                                                                                                                                                                                                                       | RGD1560957_predicted                                                                                                            | 1.569 | 0.138 | 1.946  | 0.153 | 1.498  | 0.285 | 2.107  | 0.016 |
| 1393086_at   | AI060055 | similar to RIKEN cDNA 5730469D23 (predicted)                                                                                                                                                                                                                       | RGD1308324_predicted                                                                                                            | 1.090 | 0.759 | 0.997  | 0.134 | 1.124  | 0.910 | 0.810  | 0.034 |
| 1391236_at   | BG380318 | similar to RIKEN cDNA 5730469D23 (predicted)                                                                                                                                                                                                                       | RGD1308324_predicted                                                                                                            | 0.893 | 0.955 | 1.609  | 0.084 | 0.581  | 0.103 | 1.695  | 0.045 |
| 1372895_at   | AI169367 | similar to RIKEN cDNA 5730469M10                                                                                                                                                                                                                                   | RGD1309676                                                                                                                      | 4.050 | 0.022 | 10.944 | 0.001 | 15.114 | 0.008 | 13.719 | 0.000 |
| 1392116_at   | BE102137 | similar to RIKEN cDNA 5730470L24                                                                                                                                                                                                                                   | RGD1311316                                                                                                                      | 1.109 | 0.306 | 0.826  | 0.048 | 0.897  | 0.084 | 0.871  | 0.086 |
| 1371740_at   | AI178732 | similar to RIKEN cDNA 5730470L24                                                                                                                                                                                                                                   | RGD1311316                                                                                                                      | 0.837 | 0.809 | 0.419  | 0.016 | 0.842  | 0.411 | 0.405  | 0.023 |
| 1388693_at   | BF418174 | similar to RIKEN cDNA 5730502D15 gene (predicted)                                                                                                                                                                                                                  | RGD1310875_predicted                                                                                                            | 0.750 | 0.920 | 1.449  | 0.019 | 0.734  | 0.770 | 1.209  | 0.164 |
| 1395883_at   | BF550469 | Similar to RIKEN cDNA 5730509K17 gene (predicted)                                                                                                                                                                                                                  | RGD1561042_predicted                                                                                                            | 2.094 | 0.410 | 0.945  | 0.863 | 1.203  | 0.187 | 0.935  | 0.799 |
| 1374874_at   | AI410818 | similar to RIKEN cDNA 5730509K17 gene (predicted)                                                                                                                                                                                                                  | RGD1561042_predicted                                                                                                            | 0.982 | 0.877 | 0.313  | 0.002 | 0.992  | 0.934 | 0.312  | 0.006 |
| 1374487_at   | AI169579 | similar to RIKEN cDNA 5730536A07                                                                                                                                                                                                                                   | RGD1307481                                                                                                                      | 0.877 | 0.537 | 0.955  | 0.702 | 0.778  | 0.027 | 0.868  | 0.410 |
| 1378433_at   | BI296242 | similar to RIKEN cDNA 5730557B15 (predicted)                                                                                                                                                                                                                       | RGD1564227_predicted                                                                                                            | 4.032 | 0.008 | 1.667  | 0.175 | 2.374  | 0.108 | 2.222  | 0.161 |
| 1376177_at   | AI179609 | similar to RIKEN cDNA 5730593F17 (predicted)                                                                                                                                                                                                                       | RGD1561062_predicted                                                                                                            | 0.437 | 0.053 | 0.665  | 0.094 | 0.474  | 0.001 | 0.696  | 0.000 |
| 1383360_at   | AI145787 | similar to RIKEN cDNA 5830404H04                                                                                                                                                                                                                                   | RGD735112                                                                                                                       | 1.116 | 0.990 | 1.001  | 0.617 | 1.006  | 0.944 | 0.944  | 0.423 |
| 1395620_at   | AI710510 | similar to RIKEN cDNA 5830415L20                                                                                                                                                                                                                                   | RGD1306302                                                                                                                      | 1.006 | 0.230 | 1.274  | 0.084 | 1.673  | 0.721 | 1.518  | 0.082 |
| 1374009_at   | BI282615 | similar to RIKEN cDNA 5830415L20                                                                                                                                                                                                                                   | RGD1306302                                                                                                                      | 1.046 | 0.740 | 0.818  | 0.156 | 1.214  | 0.218 | 0.874  | 0.290 |
| 1383652_at   | BF409138 | similar to RIKEN cDNA 5830427H10                                                                                                                                                                                                                                   | LOC502872                                                                                                                       | 0.622 | 0.202 | 0.935  | 0.029 | 1.033  | 0.492 | 0.980  | 0.782 |
| 1392591_at   | AI170983 | Similar to RIKEN cDNA 5830433M19                                                                                                                                                                                                                                   | MGC125002                                                                                                                       | 0.589 | 0.071 | 0.586  | 0.004 | 0.786  | 0.300 | 0.684  | 0.006 |
| 1380035_at   | BF523119 | similar to RIKEN cDNA 5830433M19                                                                                                                                                                                                                                   | MGC125002                                                                                                                       | 0.716 | 0.100 | 0.833  | 0.027 | 0.553  | 0.029 | 0.976  | 0.681 |
| 1377218_at   | BF414000 | Similar to RIKEN cDNA 5830434P21                                                                                                                                                                                                                                   | LOC296637                                                                                                                       | 1.239 | 0.175 | 1.018  | 0.375 | 1.021  | 0.784 | 1.046  | 0.175 |
| 1393346_at   | BI279863 | similar to RIKEN cDNA 5830436D01 (predicted)                                                                                                                                                                                                                       | RGD1561673_predicted                                                                                                            | 0.924 | 0.759 | 0.514  | 0.001 | 0.663  | 0.066 | 0.698  | 0.083 |
| 1377756_at   | AI232228 | similar to RIKEN cDNA 5830446M03                                                                                                                                                                                                                                   | RGD1307688                                                                                                                      | 1.390 | 0.182 | 1.928  | 0.000 | 1.371  | 0.338 | 1.746  | 0.000 |
| 1391933_at   | BF392746 | Similar to RIKEN cDNA 5830457O10 (predicted)                                                                                                                                                                                                                       | RGD1306894_predicted                                                                                                            | 1.002 | 0.496 | 0.758  | 0.139 | 0.999  | 0.532 | 0.998  | 0.336 |
| 1374516_at   | AI008492 | similar to RIKEN cDNA 5830457O10 (predicted)                                                                                                                                                                                                                       | RGD1306894_predicted                                                                                                            | 0.736 | 0.974 | 0.497  | 0.001 | 0.600  | 0.327 | 0.730  | 0.099 |
| 1377067_at   | AI137309 | similar to RIKEN cDNA 6030443O07 (predicted)                                                                                                                                                                                                                       | RGD1305918_predicted                                                                                                            | 1.001 | 0.991 | 0.495  | 0.014 | 0.991  | 0.052 | 0.579  | 0.009 |
| 1376645_at   | AW916327 | Similar to RIKEN cDNA 6330406I15 (predicted)                                                                                                                                                                                                                       | RGD1307396_predicted                                                                                                            | 0.243 | 0.066 | 0.406  | 0.097 | 0.178  | 0.007 | 0.426  | 0.076 |
| 1374929_at   | AI010233 | similar to RIKEN cDNA 6330407D12 (predicted)                                                                                                                                                                                                                       | RGD1561171_predicted                                                                                                            | 0.399 | 0.066 | 0.748  | 0.102 | 0.324  | 0.008 | 0.495  | 0.003 |
| 1374515_at   | AA848948 | similar to RIKEN cDNA 6330409N04                                                                                                                                                                                                                                   | RGD1306437                                                                                                                      | 0.859 | 0.984 | 1.657  | 0.046 | 0.698  | 0.461 | 1.431  | 0.025 |
| 1393370_at   | BG380685 | similar to RIKEN cDNA 6330415M09 (predicted)                                                                                                                                                                                                                       | RGD1308384_predicted                                                                                                            | 2.021 | 0.216 | 0.994  | 0.961 | 2.332  | 0.025 | 1.614  | 0.538 |
| 1379987_at   | BE100570 | similar to RIKEN cDNA 6330416G13 gene (predicted)                                                                                                                                                                                                                  | RGD1304595_predicted                                                                                                            | 1.062 | 0.680 | 1.899  | 0.048 | 1.162  | 0.056 | 1.280  | 0.207 |
| 1383806_at   | BF556825 | similar to RIKEN cDNA 6330509G02                                                                                                                                                                                                                                   | RGD1304726                                                                                                                      | 2.060 | 0.097 | 0.726  | 0.560 | 1.113  | 0.790 | 0.759  | 0.059 |
| 1372938_at   | AI575671 | similar to RIKEN cDNA 6330509G02                                                                                                                                                                                                                                   | RGD1304726                                                                                                                      | 0.920 | 0.509 | 0.777  | 0.184 | 0.989  | 0.395 | 0.695  | 0.022 |
| 1382737_at   | AI059118 | similar to RIKEN cDNA 6430548M08 (predicted)                                                                                                                                                                                                                       | RGD1304884_predicted                                                                                                            | 1.010 | 0.497 | 1.101  | 0.401 | 1.005  | 0.466 | 1.014  | 0.844 |

|              |          |                                                                                                             |                                                  |       |       |       |       |        |       |       |       |
|--------------|----------|-------------------------------------------------------------------------------------------------------------|--------------------------------------------------|-------|-------|-------|-------|--------|-------|-------|-------|
| 1376583_at   | BE095847 | similar to RIKEN cDNA 6430548M08 (predicted)                                                                | RGD1304884_predicted                             | 0.917 | 0.691 | 1.156 | 0.525 | 0.735  | 0.052 | 0.886 | 0.161 |
| 1384923_at   | AI137998 | Similar to RIKEN cDNA 6430571L13 gene; similar to g20 protein (predicted)                                   | RGD1307461_predicted                             | 1.027 | 0.374 | 1.004 | 0.119 | 1.234  | 0.009 | 0.996 | 0.980 |
| 1394419_at   | BE109109 | similar to RIKEN cDNA 6530401L14 gene                                                                       | RGD1309107                                       | 1.226 | 0.057 | 1.015 | 0.678 | 1.057  | 0.823 | 0.871 | 0.446 |
| 1382466_at   | BF407231 | similar to RIKEN cDNA 6530403A03                                                                            | RGD1309020                                       | 1.353 | 0.015 | 1.995 | 0.004 | 1.077  | 0.716 | 1.651 | 0.013 |
| 1377907_at   | BF287924 | similar to RIKEN cDNA 6530403A03                                                                            | RGD1309020                                       | 1.371 | 0.823 | 0.683 | 0.046 | 0.956  | 0.826 | 0.708 | 0.041 |
| 1377616_at   | BE114214 | similar to RIKEN cDNA 6720467C03 (predicted)                                                                | RGD1310681_predicted                             | 0.336 | 0.060 | 0.365 | 0.003 | 0.254  | 0.000 | 0.522 | 0.028 |
| 1378104_at   | AI105459 | similar to RIKEN cDNA 8430406I07                                                                            | RGD1307465                                       | 0.899 | 0.693 | 0.878 | 0.078 | 0.934  | 0.691 | 0.748 | 0.018 |
| 1397238_at   | AW524239 | Similar to RIKEN cDNA 8430426H19 (predicted)                                                                | RGD1559768_predicted                             | 0.913 | 0.064 | 0.286 | 0.001 | 0.958  | 0.505 | 0.366 | 0.012 |
| 1395323_x_at | BF398458 | Similar to RIKEN cDNA 8430426H19 (predicted)                                                                | RGD1559768_predicted                             | 1.469 | 0.447 | 0.814 | 0.101 | 1.166  | 0.240 | 0.724 | 0.239 |
| 1391410_at   | BM392039 | Similar to RIKEN cDNA 8430426H19 (predicted)                                                                | RGD1559768_predicted                             | 0.691 | 0.481 | 0.418 | 0.012 | 0.574  | 0.076 | 0.512 | 0.031 |
| 1372714_at   | BG668449 | similar to RIKEN cDNA 8430437G11                                                                            | RGD1307778                                       | 1.083 | 0.813 | 0.908 | 0.068 | 1.060  | 0.946 | 1.176 | 0.018 |
| 1388801_at   | AA945103 | Similar to RIKEN cDNA 9030221M09 gene (predicted)                                                           | RGD1305469_predicted                             | 1.698 | 0.107 | 0.710 | 0.091 | 1.374  | 0.157 | 1.080 | 0.386 |
| 1389036_at   | BM385629 | similar to RIKEN cDNA 9030221M09 gene (predicted)                                                           | RGD1305469_predicted                             | 1.449 | 0.154 | 1.892 | 0.026 | 1.736  | 0.067 | 1.664 | 0.247 |
| 1367514_at   | AI235508 | similar to RIKEN cDNA 9030624J02                                                                            | LOC361635                                        | 1.044 | 0.866 | 1.045 | 0.330 | 1.004  | 0.833 | 0.969 | 0.340 |
| 1389435_at   | BE329046 | Similar to RIKEN cDNA 9130005N14 (predicted)                                                                | RGD1560201_predicted                             | 0.686 | 0.974 | 0.576 | 0.001 | 0.551  | 0.029 | 0.426 | 0.004 |
| 1395226_at   | BI274777 | similar to RIKEN cDNA 9130023F12 gene (predicted)                                                           | RGD1311920_predicted                             | 1.135 | 0.083 | 2.192 | 0.000 | 0.960  | 0.516 | 1.419 | 0.009 |
| 1390500_at   | BG375508 | similar to RIKEN cDNA 9130023F12 gene (predicted)                                                           | RGD1311920_predicted                             | 0.965 | 0.921 | 0.560 | 0.019 | 0.637  | 0.038 | 0.714 | 0.005 |
| 1388482_at   | BM384306 | similar to RIKEN cDNA 9130404D14                                                                            | RGD1307018                                       | 5.825 | 0.071 | 7.923 | 0.003 | 4.154  | 0.059 | 2.762 | 0.003 |
| 1390474_at   | AA859508 | similar to RIKEN cDNA 9330161F08 (predicted)                                                                | RGD1564315_predicted                             | 0.656 | 0.386 | 0.762 | 0.021 | 0.688  | 0.205 | 0.670 | 0.100 |
| 1377701_at   | AI012404 | similar to RIKEN cDNA 9330177P20 (predicted)                                                                | RGD1561833_predicted                             | 1.189 | 0.393 | 1.533 | 0.019 | 0.701  | 0.044 | 1.361 | 0.052 |
| 1372026_at   | BI282651 | similar to RIKEN cDNA 9430023L20                                                                            | RGD1359310                                       | 1.069 | 0.284 | 2.877 | 0.020 | 1.004  | 0.973 | 2.909 | 0.048 |
| 1398337_at   | AI169116 | Similar to RIKEN cDNA 9430077D24 gene                                                                       | LOC290341                                        | 0.846 | 0.883 | 0.845 | 0.015 | 1.001  | 0.989 | 0.903 | 0.199 |
| 1389148_at   | AW254686 | similar to RIKEN cDNA 9430083G14                                                                            | RGD1549725                                       | 1.006 | 0.899 | 1.001 | 0.819 | 0.996  | 0.669 | 1.889 | 0.078 |
| 1399068_at   | BM389499 | similar to RIKEN cDNA 9430098E02 (predicted) /// similar to RIKEN cDNA 9430098E02 (predicted)               | RGD1565407_predicted ///<br>RGD1561454_predicted | 0.544 | 0.032 | 0.739 | 0.263 | 0.571  | 0.231 | 0.657 | 0.141 |
| 1389197_at   | BI290535 | similar to RIKEN cDNA 9630046K23                                                                            | RGD1306248                                       | 0.690 | 0.351 | 0.860 | 0.160 | 0.583  | 0.013 | 0.701 | 0.320 |
| 1398107_at   | AI385379 | similar to RIKEN cDNA A030007L17; EST AA673177 (predicted) /// similar to RIKEN cDNA A030007L17 (predicted) | RGD1304876_predicted ///<br>RGD1560425_predicted | 1.114 | 0.233 | 1.917 | 0.094 | 1.004  | 0.945 | 0.993 | 0.769 |
| 1392541_at   | AW919608 | similar to RIKEN cDNA A030007L17; EST AA673177 (predicted) /// similar to RIKEN cDNA A030007L17 (predicted) | RGD1304876_predicted ///<br>RGD1560425_predicted | 0.859 | 0.920 | 3.037 | 0.005 | 0.926  | 0.578 | 2.236 | 0.014 |
| 1376970_at   | AW530127 | Similar to RIKEN cDNA A130042E20; open reading frame 57 (predicted)                                         | RGD1308722_predicted                             | 1.000 | 0.969 | 0.857 | 0.101 | 1.001  | 0.972 | 0.826 | 0.116 |
| 1380904_at   | BI300461 | Similar to RIKEN cDNA A230102I05 (predicted)                                                                | RGD1311663_predicted                             | 1.116 | 0.068 | 0.987 | 0.615 | 1.178  | 0.877 | 1.114 | 0.550 |
| 1380721_at   | BE103115 | Similar to RIKEN cDNA A230102I05 (predicted)                                                                | RGD1311663_predicted                             | 1.861 | 0.324 | 0.848 | 0.217 | 1.847  | 0.166 | 1.013 | 0.619 |
| 1371443_at   | AI409584 | similar to RIKEN cDNA A430005L14                                                                            | RGD1304567                                       | 0.328 | 0.006 | 1.022 | 0.400 | 0.314  | 0.004 | 0.886 | 0.488 |
| 1382424_at   | AI071713 | Similar to RIKEN cDNA A430005L14                                                                            | RGD1304567                                       | 0.459 | 0.104 | 0.775 | 0.017 | 0.440  | 0.073 | 0.836 | 0.252 |
| 1392901_at   | BM385213 | Similar to RIKEN cDNA A430093J20 gene                                                                       | LOC367113                                        | 2.586 | 0.003 | 1.140 | 0.594 | 1.955  | 0.015 | 1.002 | 0.237 |
| 1398411_at   | BI278952 | similar to RIKEN cDNA A430107P09 gene                                                                       | LOC364357                                        | 0.760 | 0.543 | 0.619 | 0.062 | 1.140  | 0.437 | 0.701 | 0.050 |
| 1382181_at   | AI555069 | similar to RIKEN cDNA A530088I07 gene                                                                       | LOC311984                                        | 4.749 | 0.012 | 2.245 | 0.042 | 13.768 | 0.000 | 2.144 | 0.159 |
| 1390289_at   | BI283804 | similar to RIKEN cDNA A530089I17 (predicted)                                                                | RGD1311375_predicted                             | 0.389 | 0.026 | 0.291 | 0.002 | 0.465  | 0.018 | 0.312 | 0.032 |
| 1397305_at   | BE110307 | Similar to RIKEN cDNA A630054L15; hypothetical protein MGC38041 (predicted)                                 | RGD1306064_predicted                             | 0.677 | 0.134 | 0.861 | 0.518 | 0.924  | 0.613 | 0.872 | 0.484 |
| 1399150_at   | AW144400 | similar to RIKEN cDNA A630054L15; hypothetical protein MGC38041 (predicted)                                 | RGD1306064_predicted                             | 1.355 | 0.409 | 0.495 | 0.060 | 1.444  | 0.260 | 0.554 | 0.004 |
| 1383209_at   | AW916721 | similar to RIKEN cDNA A630054L15; hypothetical protein MGC38041 (predicted)                                 | RGD1306064_predicted                             | 1.018 | 0.433 | 0.807 | 0.347 | 1.108  | 0.247 | 0.940 | 0.167 |
| 1397350_at   | BE096697 | similar to RIKEN cDNA A730011L01 gene                                                                       | LOC498029                                        | 1.854 | 0.299 | 0.945 | 0.671 | 10.529 | 0.006 | 1.017 | 0.467 |
| 1398219_at   | BE109914 | similar to RIKEN cDNA A930001M12 gene (predicted)                                                           | RGD1562567_predicted                             | 0.441 | 0.013 | 0.141 | 0.001 | 0.334  | 0.048 | 0.151 | 0.012 |
| 1392015_at   | BF392359 | Similar to RIKEN cDNA A930008G19 (predicted)                                                                | RGD1310799_predicted                             | 1.348 | 0.224 | 1.356 | 0.942 | 1.033  | 0.678 | 1.176 | 0.624 |
| 1396198_at   | BF282909 | Similar to RIKEN cDNA A930008G19 (predicted)                                                                | RGD1310799_predicted                             | 0.835 | 0.589 | 0.908 | 0.524 | 1.043  | 0.736 | 1.110 | 0.618 |
| 1376654_at   | AW521378 | similar to RIKEN cDNA B130016O10 gene (predicted)                                                           | RGD1308448_predicted                             | 0.717 | 0.208 | 0.615 | 0.012 | 0.748  | 0.049 | 0.948 | 0.067 |
| 1398426_at   | AI409065 | similar to RIKEN cDNA B130052G07 (predicted)                                                                | RGD1564105_predicted                             | 0.740 | 0.973 | 0.940 | 0.738 | 0.740  | 0.974 | 0.635 | 0.644 |
| 1375006_at   | BE121050 | Similar to RIKEN cDNA B130055L09 (predicted)                                                                | RGD1309236_predicted                             | 2.140 | 0.016 | 2.007 | 0.007 | 2.613  | 0.011 | 2.207 | 0.008 |
| 1390806_at   | AW251111 | similar to RIKEN cDNA B230118H07 (predicted)                                                                | RGD1309730_predicted                             | 0.629 | 0.216 | 0.774 | 0.251 | 1.030  | 0.499 | 0.607 | 0.102 |
| 1371991_at   | AA894318 | Similar to RIKEN cDNA B230312A22                                                                            | RGD1311249                                       | 1.003 | 0.389 | 0.652 | 0.102 | 1.052  | 0.723 | 0.564 | 0.063 |
| 1376863_at   | BE109118 | similar to RIKEN cDNA B230339M05 gene (predicted)                                                           | RGD1306861_predicted                             | 0.736 | 0.033 | 1.116 | 0.263 | 0.456  | 0.017 | 1.099 | 0.280 |
| 1393505_x_at | AI045965 | similar to RIKEN cDNA B230380D07 (predicted)                                                                | RGD1311456_predicted                             | 0.822 | 0.324 | 1.125 | 0.391 | 0.718  | 0.092 | 0.953 | 0.666 |
| 1384609_a_at | AI045965 | similar to RIKEN cDNA B230380D07 (predicted)                                                                | RGD1311456_predicted                             | 0.707 | 0.332 | 0.784 | 0.981 | 0.256  | 0.043 | 1.045 | 0.618 |
| 1397774_at   | BF290889 | similar to RIKEN cDNA B230380D07 (predicted)                                                                | RGD1311456_predicted                             | 1.021 | 0.609 | 0.904 | 0.232 | 0.948  | 0.718 | 0.727 | 0.016 |
| 1391169_at   | BE120139 | Similar to RIKEN cDNA B930062P21 gene (predicted)                                                           | RGD1562562_predicted                             | 7.205 | 0.041 | 4.697 | 0.006 | 2.486  | 0.194 | 3.560 | 0.020 |
| 1381419_at   | AI145119 | Similar to RIKEN cDNA C230021P08 (predicted)                                                                | RGD1561571_predicted                             | 0.903 | 0.774 | 0.903 | 0.651 | 1.385  | 0.068 | 1.320 | 0.284 |
| 1379356_at   | AI574991 | Similar to RIKEN cDNA C230093N12 (predicted)                                                                | RGD1310037_predicted                             | 0.851 | 0.996 | 0.384 | 0.089 | 0.867  | 0.613 | 0.693 | 0.317 |
| 1372341_at   | AI233213 | Similar to RIKEN cDNA C330005L02                                                                            | LOC501039                                        | 0.625 | 0.019 | 0.771 | 0.006 | 0.523  | 0.002 | 0.732 | 0.006 |
| 1380084_at   | BF399367 | Similar to RIKEN cDNA C330005L02                                                                            | LOC501039                                        | 1.627 | 0.125 | 1.023 | 0.889 | 0.983  | 0.997 | 1.002 | 0.991 |
| 1392789_at   | BI296353 | Similar to RIKEN cDNA C330005L02                                                                            | LOC501039                                        | 0.660 | 0.359 | 7.001 | 0.001 | 0.753  | 0.335 | 4.624 | 0.005 |



|              |          |                                                                                                                                          |                                                                                                  |        |       |        |       |        |       |        |       |
|--------------|----------|------------------------------------------------------------------------------------------------------------------------------------------|--------------------------------------------------------------------------------------------------|--------|-------|--------|-------|--------|-------|--------|-------|
| 1390602_a_at | BG381320 | similar to RIKEN cDNA C430004E15                                                                                                         | LOC499749                                                                                        | 1.010  | 0.955 | 1.686  | 0.029 | 0.526  | 0.016 | 0.942  | 0.543 |
| 1395624_at   | BF546268 | Similar to RIKEN cDNA C430008C19                                                                                                         | RGD1307947                                                                                       | 0.425  | 0.059 | 0.738  | 0.117 | 0.405  | 0.113 | 0.632  | 0.053 |
| 1389264_at   | BI278594 | similar to RIKEN cDNA C730048E16                                                                                                         | RGD1309552                                                                                       | 0.867  | 0.628 | 1.262  | 0.444 | 0.666  | 0.679 | 0.951  | 0.819 |
| 1395739_at   | BG672302 | similar to RIKEN cDNA C920006C10 (predicted)                                                                                             | RGD1305976_predicted                                                                             | 2.238  | 0.001 | 3.302  | 0.009 | 2.131  | 0.006 | 4.234  | 0.004 |
| 1389526_at   | BG373853 | similar to RIKEN cDNA C920006C10 (predicted)                                                                                             | RGD1305976_predicted                                                                             | 1.409  | 0.211 | 0.900  | 0.366 | 1.884  | 0.012 | 1.095  | 0.105 |
| 1390550_at   | BF403636 | similar to RIKEN cDNA C920006C10 (predicted)                                                                                             | RGD1305976_predicted                                                                             | 1.148  | 0.650 | 2.857  | 0.064 | 1.232  | 0.258 | 1.536  | 0.227 |
| 1374400_at   | BI291528 | similar to RIKEN cDNA C920006C10 (predicted)                                                                                             | RGD1305976_predicted                                                                             | 1.198  | 0.716 | 0.577  | 0.003 | 1.449  | 0.263 | 0.786  | 0.012 |
| 1374004_at   | BM387902 | similar to RIKEN cDNA D030028O16                                                                                                         | RGD1310143                                                                                       | 0.498  | 0.057 | 0.800  | 0.075 | 0.452  | 0.020 | 1.007  | 0.739 |
| 1381321_at   | BE113257 | Similar to RIKEN cDNA D030060M11                                                                                                         | RGD1308076                                                                                       | 1.403  | 0.406 | 1.262  | 0.265 | 1.172  | 0.681 | 1.066  | 0.539 |
| 1377480_at   | BF387366 | similar to RIKEN cDNA D030060M11                                                                                                         | RGD1308076                                                                                       | 1.104  | 0.431 | 1.280  | 0.038 | 1.478  | 0.764 | 1.373  | 0.010 |
| 1374479_at   | BM390240 | similar to RIKEN cDNA D030070L09                                                                                                         | RGD1310199                                                                                       | 1.295  | 0.248 | 0.913  | 0.589 | 1.406  | 0.662 | 1.016  | 0.970 |
| 1389302_at   | BI289482 | similar to RIKEN cDNA D030070L09                                                                                                         | RGD1310199                                                                                       | 1.449  | 0.452 | 0.920  | 0.277 | 0.965  | 0.773 | 1.006  | 0.964 |
| 1388425_at   | BG671569 | similar to RIKEN cDNA D130038B21                                                                                                         | RGD1305890                                                                                       | 3.503  | 0.077 | 3.776  | 0.041 | 3.306  | 0.053 | 4.400  | 0.026 |
| 1397959_at   | AW534218 | similar to RIKEN cDNA D130059P03 gene (predicted)                                                                                        | RGD1310722_predicted                                                                             | 1.905  | 0.047 | 1.305  | 0.068 | 1.407  | 0.091 | 1.195  | 0.892 |
| 1393091_at   | H34096   | similar to RIKEN cDNA D130064H19 (predicted)                                                                                             | RGD1311241_predicted                                                                             | 0.854  | 0.139 | 0.824  | 0.053 | 0.679  | 0.021 | 0.818  | 0.038 |
| 1375934_at   | BE112948 | similar to RIKEN cDNA D330045A20 (predicted)                                                                                             | RGD1566282_predicted                                                                             | 0.512  | 0.049 | 1.107  | 0.177 | 0.695  | 0.030 | 0.836  | 0.224 |
| 1383554_at   | AW142796 | similar to RIKEN cDNA D330045A20 (predicted)                                                                                             | RGD1566282_predicted                                                                             | 0.783  | 0.094 | 1.377  | 0.371 | 0.760  | 0.049 | 1.306  | 0.327 |
| 1384472_at   | AA926022 | similar to RIKEN cDNA D330050P16 gene                                                                                                    | LOC362683                                                                                        | 0.774  | 0.486 | 0.609  | 0.004 | 0.965  | 0.340 | 0.812  | 0.013 |
| 1383710_at   | BE098872 | similar to RIKEN cDNA D330050P16 gene /// similar to KIAA1414 protein                                                                    | LOC362683 /// LOC362684                                                                          | 1.016  | 0.793 | 0.464  | 0.019 | 1.001  | 0.823 | 0.419  | 0.010 |
| 1376446_at   | BE099060 | similar to RIKEN cDNA D430028G21                                                                                                         | MGC93707                                                                                         | 1.004  | 0.758 | 0.958  | 0.841 | 1.032  | 0.367 | 0.933  | 0.600 |
| 1384858_a_at | AA964590 | similar to RIKEN cDNA D530033C11 (predicted)                                                                                             | RGD1307179_predicted                                                                             | 0.980  | 0.896 | 1.627  | 0.024 | 0.955  | 0.725 | 1.448  | 0.034 |
| 1389476_at   | AI010238 | similar to RIKEN cDNA D630029K19                                                                                                         | RGD1307100                                                                                       | 1.421  | 0.001 | 0.660  | 0.005 | 1.452  | 0.057 | 0.690  | 0.011 |
| 1384483_at   | BI274216 | Similar to RIKEN cDNA E030034P13 (predicted)                                                                                             | RGD1309385_predicted                                                                             | 11.402 | 0.010 | 8.062  | 0.000 | 15.690 | 0.003 | 10.932 | 0.001 |
| 1372555_at   | AI171778 | similar to RIKEN cDNA E030034P13 (predicted)                                                                                             | RGD1309385_predicted                                                                             | 0.630  | 0.565 | 1.018  | 0.955 | 0.716  | 0.176 | 0.857  | 0.527 |
| 1374579_at   | BF281860 | Similar to RIKEN cDNA E230015L20 gene (predicted)                                                                                        | RGD1560873_predicted                                                                             | 1.473  | 0.939 | 0.559  | 0.015 | 1.267  | 0.648 | 0.607  | 0.070 |
| 1383095_at   | BM387808 | Similar to RIKEN cDNA E230015L20 gene (predicted)                                                                                        | RGD1560873_predicted                                                                             | 1.008  | 0.973 | 0.368  | 0.000 | 1.108  | 0.746 | 0.510  | 0.000 |
| 1391812_at   | AI145876 | Similar to RIKEN cDNA E330026B02 (predicted)                                                                                             | RGD1309172_predicted                                                                             | 0.392  | 0.006 | 0.059  | 0.002 | 0.571  | 0.035 | 0.122  | 0.023 |
| 1373086_at   | AI102818 | similar to RIKEN cDNA F730014I05 (predicted)                                                                                             | RGD1310800_predicted                                                                             | 0.680  | 0.171 | 1.259  | 0.877 | 0.897  | 0.546 | 1.118  | 0.595 |
| 1390278_at   | BI279652 | similar to RIKEN cDNA G430041M01 (predicted)                                                                                             | RGD1562563_predicted                                                                             | 1.252  | 0.061 | 1.261  | 0.198 | 1.572  | 0.008 | 1.260  | 0.195 |
| 1377762_at   | BG381701 | Similar to RIKEN cDNA G430041M01 (predicted)                                                                                             | RGD1562563_predicted                                                                             | 1.304  | 0.275 | 2.285  | 0.022 | 1.819  | 0.006 | 0.985  | 0.407 |
| 1394585_at   | BE116089 | Similar to RIKEN cDNA G430041M01 (predicted)                                                                                             | RGD1562563_predicted                                                                             | 1.075  | 0.534 | 1.687  | 0.154 | 1.874  | 0.104 | 0.938  | 0.532 |
| 1380489_at   | BF389269 | Similar to RIKEN cDNA G430041M01 (predicted)                                                                                             | RGD1562563_predicted                                                                             | 0.975  | 0.648 | 1.115  | 0.271 | 1.062  | 0.851 | 0.803  | 0.460 |
| 1392758_at   | AA943056 | similar to RIKEN cDNA G430041M01 (predicted)                                                                                             | RGD1562563_predicted                                                                             | 1.155  | 0.794 | 1.378  | 0.684 | 1.282  | 0.372 | 0.667  | 0.248 |
| 1378326_at   | AW435059 | similar to RIKEN cDNA G430055L02                                                                                                         | LOC366012                                                                                        | 1.306  | 0.072 | 1.081  | 0.026 | 1.048  | 0.250 | 1.173  | 0.430 |
| 1383260_at   | BI289879 | similar to RIKEN cDNA G630024C07 gene (predicted)                                                                                        | RGD1305903_predicted                                                                             | 0.891  | 0.990 | 0.823  | 0.352 | 0.961  | 0.303 | 0.928  | 0.349 |
| 1393018_at   | AI071984 | Similar to RING finger protein 33 (predicted)                                                                                            | RGD1565534_predicted                                                                             | 0.304  | 0.131 | 31.829 | 0.000 | 0.430  | 0.027 | 19.187 | 0.001 |
| 1373708_at   | BG378168 | similar to RNA binding motif protein 21                                                                                                  | MGC125034                                                                                        | 0.734  | 0.322 | 1.452  | 0.105 | 0.660  | 0.212 | 1.588  | 0.018 |
| 1392936_at   | AW434972 | similar to RNA binding motif protein 25 (predicted)                                                                                      | RGD1565486_predicted                                                                             | 1.173  | 0.071 | 0.857  | 0.242 | 0.953  | 0.676 | 0.820  | 0.011 |
| 1375898_at   | AW252379 | similar to RNA binding protein gene with multiple splicing (predicted)                                                                   | RGD1561067_predicted                                                                             | 1.356  | 0.026 | 0.416  | 0.001 | 1.328  | 0.060 | 0.517  | 0.033 |
| 1372380_at   | AI231308 | similar to RNA binding protein gene with multiple splicing (predicted)                                                                   | RGD1561067_predicted                                                                             | 0.976  | 0.728 | 2.710  | 0.002 | 0.910  | 0.255 | 2.370  | 0.012 |
| 1371351_at   | AI233192 | similar to RNA polymerase 1-3                                                                                                            | MGC112727                                                                                        | 0.964  | 0.740 | 1.892  | 0.000 | 0.905  | 0.480 | 1.183  | 0.266 |
| 1396410_at   | BE116258 | Similar to RNA-binding protein isoform G3BP-2a                                                                                           | RGD1309571                                                                                       | 1.159  | 0.120 | 1.168  | 0.834 | 1.411  | 0.019 | 1.052  | 0.651 |
| 1375974_at   | AI406315 | Similar to RNA-binding protein isoform G3BP-2a                                                                                           | RGD1309571                                                                                       | 1.489  | 0.140 | 1.094  | 0.388 | 1.491  | 0.109 | 1.053  | 0.298 |
| 1392572_at   | BI282339 | similar to RNA-binding protein Musashi2-S (predicted)                                                                                    | RGD1560397_predicted                                                                             | 1.186  | 0.004 | 1.665  | 0.055 | 1.417  | 0.002 | 1.825  | 0.011 |
| 1385427_at   | BE118330 | similar to RNA-binding protein Musashi2-S (predicted)                                                                                    | RGD1560397_predicted                                                                             | 1.519  | 0.012 | 1.209  | 0.199 | 1.468  | 0.031 | 1.462  | 0.280 |
| 1380541_at   | AA957801 | Similar to RNA-binding protein Musashi2-S (predicted)                                                                                    | RGD1560397_predicted                                                                             | 1.709  | 0.015 | 0.517  | 0.002 | 1.829  | 0.009 | 0.767  | 0.139 |
| 1388870_at   | BF284305 | Similar to RNA-binding protein Musashi2-S (predicted)                                                                                    | RGD1560397_predicted                                                                             | 1.243  | 0.162 | 0.361  | 0.008 | 1.659  | 0.103 | 0.622  | 0.079 |
| 1385809_at   | AI070105 | Similar to Rnf37-pending protein                                                                                                         | RGD1305440                                                                                       | 0.482  | 0.044 | 1.583  | 0.148 | 0.362  | 0.029 | 1.217  | 0.470 |
| 1389702_at   | AI013041 | similar to Rnf37-pending protein                                                                                                         | RGD1305440                                                                                       | 1.004  | 0.973 | 1.033  | 0.285 | 1.019  | 0.452 | 1.003  | 0.956 |
| 1383743_at   | BI275464 | similar to RP23-462P2.7 (predicted)                                                                                                      | RGD1561607_predicted                                                                             | 1.669  | 0.009 | 0.901  | 0.028 | 1.586  | 0.009 | 1.373  | 0.091 |
| 1379055_x_at | BF410240 | similar to Rpl17 protein (predicted) /// similar to Ac1147 (predicted) /// similar to Ac1147 /// similar to Ac1147 /// similar to Ac1147 | RGD1565093_predicted ///<br>RGD1561314_predicted ///<br>LOC503301 /// LOC503405<br>/// LOC503410 | 1.300  | 0.866 | 1.253  | 0.170 | 1.447  | 0.195 | 1.249  | 0.220 |
| 1372554_at   | AA943110 | Similar to RW1 protein (predicted)                                                                                                       | RGD1309266_predicted                                                                             | 0.791  | 0.719 | 0.566  | 0.009 | 0.694  | 0.079 | 0.800  | 0.010 |
| 1371350_at   | AI412159 | similar to S-adenosylmethionine synthetase gamma form (Methionine adenosyltransferase) (predicted)                                       | RGD1560523_predicted                                                                             | 0.629  | 0.000 | 0.965  | 0.363 | 0.612  | 0.004 | 1.116  | 0.129 |
| 1390360_a_at | BI282944 | similar to Safb2 protein                                                                                                                 | LOC301126                                                                                        | 0.744  | 0.222 | 1.323  | 0.461 | 1.002  | 0.251 | 0.951  | 0.730 |
| 1374500_at   | AI011571 | similar to sarcoma antigen NY-SAR-27                                                                                                     | LOC499691                                                                                        | 0.757  | 0.030 | 0.971  | 0.263 | 1.216  | 0.615 | 0.803  | 0.916 |
| 1385455_at   | BF397666 | similar to sarcoma antigen NY-SAR-27                                                                                                     | LOC499691                                                                                        | 0.898  | 0.314 | 1.251  | 0.363 | 1.131  | 0.852 | 1.017  | 0.861 |
| 1379691_at   | BM389372 | similar to sarcoma antigen NY-SAR-27                                                                                                     | LOC499691                                                                                        | 0.768  | 0.352 | 0.709  | 0.196 | 0.744  | 0.539 | 0.543  | 0.027 |
| 1383371_at   | AI712305 | Similar to scavenger receptor cysteine rich domain containing, group B (4 domains) (predicted)                                           | RGD1561163_predicted                                                                             | 0.509  | 0.084 | 0.556  | 0.020 | 0.829  | 0.229 | 0.990  | 0.476 |

|            |          |                                                                                                                                       |                                          |       |       |       |       |       |       |       |       |
|------------|----------|---------------------------------------------------------------------------------------------------------------------------------------|------------------------------------------|-------|-------|-------|-------|-------|-------|-------|-------|
| 1382601_at | AI237698 | Similar to scavenger receptor type A SR-A (predicted)                                                                                 | RGD1564316_predicted                     | 1.223 | 0.828 | 1.045 | 0.726 | 1.199 | 0.610 | 1.248 | 0.080 |
| 1378080_at | BI274498 | similar to SCO cytochrome oxidase deficient homolog 1 (yeast) (predicted)                                                             | RGD1559538_predicted                     | 0.972 | 0.993 | 1.321 | 0.073 | 0.963 | 0.957 | 0.929 | 0.548 |
| 1389024_at | BG380647 | similar to Sec1 family domain containing protein 2 (Syntaxin binding protein 1-like 1) (Neuronal Sec1)                                | LOC498353                                | 0.673 | 0.011 | 0.471 | 0.017 | 0.460 | 0.005 | 0.825 | 0.031 |
| 1388991_at | AA892491 | similar to SEC14 and spectrin domains 1 (predicted)                                                                                   | RGD1562244_predicted                     | 1.963 | 0.057 | 2.576 | 0.158 | 1.595 | 0.015 | 1.170 | 0.178 |
| 1388334_at | AI176849 | similar to SEC14-like 1 (predicted)                                                                                                   | RGD1563123_predicted                     | 0.650 | 0.585 | 0.762 | 0.221 | 0.551 | 0.359 | 0.902 | 0.476 |
| 1398886_at | BI285703 | similar to Selenoprotein H (predicted)                                                                                                | RGD1563348_predicted                     | 0.898 | 0.884 | 2.087 | 0.006 | 0.590 | 0.016 | 2.254 | 0.002 |
| 1388705_at | BI282694 | similar to selenoprotein SelM (predicted)                                                                                             | RGD1565037_predicted                     | 0.653 | 0.643 | 1.010 | 0.359 | 0.493 | 0.108 | 0.740 | 0.854 |
| 1373508_at | AI180004 | similar to Selenoprotein T precursor                                                                                                  | LOC499625                                | 0.571 | 0.278 | 0.773 | 0.029 | 0.696 | 0.098 | 0.717 | 0.031 |
| 1389354_at | BF285490 | similar to semaF cytoplasmic domain associated protein 2                                                                              | LOC365960                                | 1.029 | 0.553 | 0.999 | 0.286 | 1.186 | 0.442 | 1.237 | 0.070 |
| 1381162_at | AI136863 | Similar to septin 10 isoform 1                                                                                                        | LOC309891                                | 1.356 | 0.124 | 1.219 | 0.146 | 2.078 | 0.008 | 1.254 | 0.048 |
| 1372044_at | AI410321 | similar to Ser/Thr-rich protein T10 in DGCR region (predicted)                                                                        | RGD1310348_predicted                     | 0.516 | 0.002 | 0.309 | 0.015 | 0.695 | 0.167 | 0.462 | 0.009 |
| 1389358_at | BF282740 | Similar to serine/threonine kinase                                                                                                    | LOC498312                                | 1.312 | 0.215 | 0.797 | 0.033 | 0.726 | 0.698 | 0.673 | 0.024 |
| 1397880_at | BF389592 | Similar to serine/threonine kinase                                                                                                    | LOC498312                                | 0.735 | 0.604 | 0.944 | 0.798 | 0.591 | 0.009 | 0.878 | 0.168 |
| 1389219_at | AI406322 | Similar to serine/threonine kinase                                                                                                    | LOC498312                                | 0.987 | 0.774 | 0.906 | 0.050 | 0.617 | 0.269 | 0.975 | 0.102 |
| 1374584_at | BM388112 | similar to Serine/threonine protein kinase 24 (predicted)                                                                             | RGD1561742_predicted                     | 0.953 | 0.360 | 1.073 | 0.063 | 0.739 | 0.011 | 0.944 | 0.646 |
| 1398089_at | BF401882 | Similar to Serine/threonine protein kinase 24 (predicted)                                                                             | RGD1561742_predicted                     | 1.930 | 0.470 | 0.956 | 0.848 | 1.045 | 0.943 | 0.906 | 0.958 |
| 1375450_at | BF403864 | similar to serologically defined colon cancer antigen 1 isoform a (predicted)                                                         | RGD1561973_predicted                     | 1.193 | 0.216 | 0.601 | 0.535 | 0.966 | 0.349 | 0.601 | 0.571 |
| 1377212_at | BF416289 | Similar to Serologically defined colon cancer antigen 13 (predicted)                                                                  | RGD1564816_predicted                     | 1.427 | 0.026 | 0.730 | 0.071 | 1.038 | 0.830 | 0.759 | 0.482 |
| 1384922_at | AW527642 | Similar to SERTA domain containing 4 (predicted)                                                                                      | RGD1564561_predicted                     | 0.255 | 0.004 | 0.055 | 0.001 | 0.256 | 0.000 | 0.211 | 0.006 |
| 1385073_at | AI145639 | similar to SERTA domain containing 4 (predicted)                                                                                      | RGD1564561_predicted                     | 0.359 | 0.041 | 0.189 | 0.051 | 0.229 | 0.012 | 0.183 | 0.087 |
| 1392711_at | AA996440 | Similar to SERTA domain containing 4 (predicted)                                                                                      | RGD1564561_predicted                     | 0.622 | 0.152 | 0.145 | 0.007 | 0.840 | 0.148 | 0.350 | 0.049 |
| 1388842_at | BG380385 | similar to serum response factor (predicted)                                                                                          | RGD1559787_predicted                     | 3.624 | 0.004 | 3.282 | 0.003 | 1.687 | 0.024 | 1.565 | 0.042 |
| 1374829_at | BF395579 | similar to serum response factor (predicted)                                                                                          | RGD1559787_predicted                     | 1.250 | 0.184 | 3.208 | 0.062 | 1.002 | 0.984 | 1.000 | 0.995 |
| 1391046_at | BM384217 | similar to SET and MYND domain containing 3                                                                                           | LOC498295                                | 0.981 | 0.318 | 1.460 | 0.037 | 0.976 | 0.221 | 1.237 | 0.012 |
| 1375171_at | BF396622 | Similar to SET binding factor 2 (predicted)                                                                                           | RGD1559442_predicted                     | 2.175 | 0.070 | 2.259 | 0.029 | 2.051 | 0.079 | 1.688 | 0.000 |
| 1372458_at | AI235220 | similar to SET domain-containing protein                                                                                              | LOC498178                                | 0.998 | 0.490 | 1.721 | 0.006 | 1.045 | 0.609 | 1.496 | 0.031 |
| 1372230_at | AI105430 | similar to seven transmembrane domain protein                                                                                         | RGD1304706                               | 0.462 | 0.193 | 1.022 | 0.880 | 0.709 | 0.032 | 1.119 | 0.593 |
| 1381623_at | BF391476 | similar to Sfrs4 protein (predicted)                                                                                                  | RGD1561347_predicted                     | 1.225 | 0.354 | 2.076 | 0.005 | 1.591 | 0.332 | 1.886 | 0.001 |
| 1398084_at | BF419651 | Similar to SH3 domain binding glutamic acid-rich protein like 2                                                                       | LOC501026                                | 2.256 | 0.064 | 2.040 | 0.445 | 1.605 | 0.133 | 1.389 | 0.420 |
| 1389639_at | BF283302 | similar to Shb protein (predicted)                                                                                                    | RGD1565350_predicted                     | 3.283 | 0.008 | 2.949 | 0.008 | 2.726 | 0.018 | 1.696 | 0.026 |
| 1389575_at | BF284868 | similar to sid2057p                                                                                                                   | RGD1311703                               | 0.967 | 0.868 | 1.067 | 0.678 | 0.897 | 0.493 | 1.033 | 0.709 |
| 1393801_at | AI111841 | similar to Sid3177p /// similar to Telomerase-binding protein p23 (Hsp90 co-chaperone) (Progesterone receptor complex p23) (Sid 3177) | LOC367808 /// LOC501566                  | 0.794 | 0.083 | 1.705 | 0.062 | 0.685 | 0.025 | 1.191 | 0.338 |
| 1375552_at | BG372976 | similar to signal recognition particle,72 kDa subunit                                                                                 | LOC498351                                | 0.667 | 0.033 | 1.122 | 0.385 | 0.750 | 0.093 | 1.121 | 0.762 |
| 1399144_at | BG670238 | Similar to signal recognition particle,72 kDa subunit                                                                                 | LOC498351                                | 0.505 | 0.111 | 0.723 | 0.042 | 0.521 | 0.093 | 0.851 | 0.449 |
| 1367501_at | BM383845 | Similar to signal recognition particle,72 kDa subunit                                                                                 | LOC498351                                | 0.787 | 0.141 | 1.316 | 0.019 | 0.939 | 0.447 | 1.240 | 0.102 |
| 1392957_at | BF565151 | similar to Single-stranded DNA-binding protein 2 (Sequence-specific single-stranded-DNA-binding protein 2) (predicted)                | RGD1562968_predicted                     | 0.660 | 0.013 | 0.664 | 0.062 | 0.462 | 0.083 | 0.820 | 0.141 |
| 1372491_at | AI229647 | similar to Ski protein (predicted)                                                                                                    | RGD1565591_predicted                     | 1.417 | 0.462 | 1.119 | 0.154 | 0.650 | 0.150 | 0.661 | 0.759 |
| 1391633_at | BF390387 | Similar to SLIT-ROBO Rho GTPase-activating protein 1 (predicted)                                                                      | RGD1566260_predicted                     | 1.515 | 0.528 | 1.650 | 0.038 | 0.509 | 0.404 | 0.991 | 0.966 |
| 1379542_at | BF522334 | similar to Small nuclear ribonucleoprotein F (snRNP-F) (predicted) /// small nuclear ribonucleoprotein polypeptide F (predicted)      | RGD1561993_predicted /// Snrpf_predicted | 0.580 | 0.332 | 0.820 | 0.156 | 0.565 | 0.119 | 0.890 | 0.958 |
| 1377731_at | AI454091 | similar to small unique nuclear receptor co-repressor (predicted)                                                                     | RGD1560600_predicted                     | 1.053 | 0.452 | 1.070 | 0.250 | 1.142 | 0.092 | 1.171 | 0.168 |
| 1372105_at | BF284932 | similar to Smhs2 homolog (predicted)                                                                                                  | RGD1309934_predicted                     | 1.315 | 0.423 | 1.514 | 0.002 | 0.907 | 0.491 | 1.361 | 0.021 |
| 1371712_at | AI176503 | similar to snRNP core protein SMX5d (predicted)                                                                                       | RGD1560193_predicted                     | 0.516 | 0.773 | 2.221 | 0.010 | 0.544 | 0.028 | 1.857 | 0.021 |
| 1376936_at | BI296215 | similar to sodium/calcium exchanger protein                                                                                           | LOC498185                                | 1.623 | 0.171 | 1.146 | 0.265 | 0.948 | 0.646 | 1.014 | 0.762 |
| 1380105_at | C07059   | similar to Solute carrier family 23, member 2 (Sodium-dependent vitamin C transporter 2) (predicted)                                  | RGD1565367_predicted                     | 0.983 | 0.390 | 0.205 | 0.000 | 0.888 | 0.747 | 0.279 | 0.005 |
| 1372289_at | AI170792 | similar to solute carrier family 25 (mitochondrial carrier, Aralar), member 12 (predicted)                                            | RGD1561141_predicted                     | 0.555 | 0.131 | 0.934 | 0.567 | 0.553 | 0.992 | 0.779 | 0.485 |
| 1384413_at | AA900068 | Similar to solute carrier family 35, member A5 (predicted)                                                                            | RGD1564361_predicted                     | 2.668 | 0.014 | 0.818 | 0.169 | 3.213 | 0.009 | 1.086 | 0.452 |
| 1389391_at | AI411981 | Similar to Solute carrier family 35, member E3 (predicted)                                                                            | RGD1564876_predicted                     | 0.680 | 0.251 | 1.195 | 0.208 | 0.658 | 0.016 | 1.111 | 0.414 |
| 1378131_at | AI045015 | Similar to solute carrier family 9 (sodium/hydrogen exchanger), isoform 9 (predicted)                                                 | RGD1560736_predicted                     | 0.719 | 0.040 | 0.710 | 0.468 | 0.511 | 0.081 | 0.858 | 0.265 |
| 1394902_at | AA996417 | Similar to sorting nexin 21 isoform a; sorting nexin L; sorting nexin 21 (predicted)                                                  | RGD1311169_predicted                     | 1.473 | 0.590 | 1.362 | 0.077 | 1.212 | 0.097 | 1.139 | 0.326 |
| 1374745_at | BM391278 | Similar to sorting nexin 21 isoform a; sorting nexin L; sorting nexin 21 (predicted)                                                  | RGD1311169_predicted                     | 1.001 | 0.990 | 1.157 | 0.361 | 1.443 | 0.226 | 1.015 | 0.894 |
| 1384760_at | AI711126 | similar to Sorting nexin 6 (TRAF4-associated factor 2) (predicted)                                                                    | RGD1560591_predicted                     | 1.001 | 0.973 | 0.623 | 0.002 | 1.003 | 0.773 | 0.623 | 0.002 |
| 1379942_at | AA858564 | Similar to SOX2 protein (predicted)                                                                                                   | RGD1565646_predicted                     | 0.464 | 0.231 | 1.634 | 0.399 | 1.352 | 0.275 | 1.569 | 0.093 |
| 1379742_at | BI301216 | similar to SP140 nuclear body protein isoform 1                                                                                       | LOC501175                                | 1.198 | 0.770 | 1.108 | 0.113 | 4.158 | 0.005 | 2.414 | 0.042 |
| 1383103_at | BE110514 | Similar to Sperm 1 POU-domain transcription factor (SPRM-1) (predicted)                                                               | RGD1305526_predicted                     | 0.882 | 0.323 | 0.799 | 0.138 | 0.859 | 0.250 | 0.875 | 0.257 |
| 1389516_at | BI300082 | Similar to Sperm 1 POU-domain transcription factor (SPRM-1) (predicted)                                                               | RGD1305526_predicted                     | 1.347 | 0.448 | 1.043 | 0.809 | 1.319 | 0.932 | 0.934 | 0.519 |
| 1381393_at | BI301735 | Similar to sperm antigen HCMOGT-1                                                                                                     | RGD1309718                               | 0.807 | 0.674 | 0.996 | 0.402 | 1.671 | 0.019 | 1.162 | 0.869 |
| 1397391_at | AI454739 | Similar to spermatogenesis associated glutamate (E)-rich protein 4d                                                                   | LOC296777                                | 0.703 | 0.149 | 0.444 | 0.013 | 0.572 | 0.044 | 0.423 | 0.036 |
| 1395806_at | AI547628 | similar to spermatogenesis associated glutamate (E)-rich protein 4d                                                                   | LOC501290                                | 1.772 | 0.399 | 0.820 | 0.152 | 1.134 | 0.634 | 0.648 | 0.201 |

|              |           |                                                                                                                                                      |                      |        |       |        |       |        |       |        |       |
|--------------|-----------|------------------------------------------------------------------------------------------------------------------------------------------------------|----------------------|--------|-------|--------|-------|--------|-------|--------|-------|
| 1373592_at   | AI407094  | similar to SPI6                                                                                                                                      | MGC94010             | 4.846  | 0.023 | 1.762  | 0.118 | 4.018  | 0.076 | 5.090  | 0.013 |
| 1384023_at   | AI229556  | similar to Spindlin-like (predicted)                                                                                                                 | RGD1560898_predicted | 0.813  | 0.180 | 0.996  | 0.908 | 0.817  | 0.188 | 0.999  | 0.986 |
| 1379409_at   | AW915474  | similar to spinocerebellar ataxia 7 homolog (predicted)                                                                                              | RGD1562692_predicted | 1.893  | 0.267 | 1.127  | 0.225 | 1.783  | 0.177 | 0.986  | 0.363 |
| 1388675_at   | BE349771  | similar to spinster-like protein                                                                                                                     | RGD1305613           | 0.817  | 0.861 | 1.998  | 0.009 | 0.772  | 0.884 | 2.077  | 0.058 |
| 1379221_at   | AI716277  | similar to SPLa/RY anodine receptor SPRY (1J970) (predicted)                                                                                         | RGD1308847_predicted | 1.071  | 0.505 | 1.198  | 0.766 | 1.220  | 0.086 | 1.003  | 0.906 |
| 1394441_at   | AW528593  | similar to SPLa/RY anodine receptor SPRY (1J970) (predicted)                                                                                         | RGD1308847_predicted | 1.058  | 0.752 | 0.791  | 0.021 | 1.260  | 0.158 | 0.867  | 0.269 |
| 1382056_at   | AI145768  | similar to splicing factor p54                                                                                                                       | LOC502603            | 0.988  | 0.086 | 1.163  | 0.474 | 0.723  | 0.427 | 0.914  | 0.637 |
| 1368212_at   | NM_031021 | similar to splicing factor p54                                                                                                                       | LOC502603            | 1.213  | 0.275 | 1.151  | 0.014 | 1.104  | 0.399 | 1.087  | 0.095 |
| 1371838_at   | AI411155  | similar to splicing factor, arginine/serine-rich 2                                                                                                   | Sfrs2                | 1.106  | 0.264 | 1.428  | 0.001 | 1.133  | 0.300 | 1.326  | 0.003 |
| 1371839_at   | AA819369  | similar to splicing factor, arginine/serine-rich 2                                                                                                   | Sfrs2                | 0.626  | 0.551 | 1.587  | 0.003 | 0.659  | 0.048 | 1.328  | 0.110 |
| 1373543_at   | BI296461  | Similar to Sprouty homolog 3 (Spry-3) (predicted)                                                                                                    | RGD1564382_predicted | 0.644  | 0.120 | 0.415  | 0.019 | 0.777  | 0.352 | 0.508  | 0.005 |
| 1385686_at   | BI283251  | similar to SPRR1b (predicted)                                                                                                                        | RGD1565265_predicted | 0.639  | 0.174 | 0.992  | 0.947 | 0.676  | 0.204 | 0.999  | 0.964 |
| 1397635_at   | BM390325  | similar to squamous cell carcinoma antigen 2 (predicted)                                                                                             | RGD1562868_predicted | 1.007  | 0.442 | 1.537  | 0.191 | 1.090  | 0.130 | 0.654  | 0.035 |
| 1373534_at   | BE107209  | similar to SR rich protein                                                                                                                           | RGD1307395           | 0.902  | 0.719 | 0.760  | 0.010 | 1.241  | 0.260 | 0.953  | 0.491 |
| 1373852_at   | AA859922  | similar to SRD5A2L                                                                                                                                   | RGD1308828           | 1.398  | 0.082 | 1.220  | 0.182 | 0.834  | 0.637 | 0.617  | 0.063 |
| 1392813_at   | AI548994  | Similar to SRY sex determining region Y-box 9 protein (predicted)                                                                                    | RGD1563617_predicted | 1.895  | 0.232 | 1.196  | 0.119 | 1.060  | 0.578 | 1.293  | 0.155 |
| 1382291_at   | AI454332  | Similar to SRY sex determining region Y-box 9 protein (predicted)                                                                                    | RGD1563617_predicted | 1.888  | 0.477 | 2.188  | 0.421 | 1.446  | 0.909 | 1.607  | 0.439 |
| 1381935_at   | BE115780  | Similar to Sspn protein (predicted)                                                                                                                  | RGD1559723_predicted | 1.002  | 0.317 | 0.867  | 0.207 | 0.858  | 0.104 | 0.999  | 0.986 |
| 1373871_at   | AW435481  | similar to STAGA complex 65 gamma subunit (predicted)                                                                                                | RGD1562206_predicted | 0.637  | 0.247 | 0.517  | 0.001 | 0.569  | 0.265 | 0.774  | 0.039 |
| 1381461_at   | AI058509  | Similar to StAR-related protein 1-4E (predicted)                                                                                                     | RGD1561783_predicted | 1.385  | 0.015 | 0.414  | 0.002 | 1.274  | 0.006 | 0.526  | 0.015 |
| 1394275_at   | BF559096  | Similar to StAR-related protein 1-4E (predicted)                                                                                                     | RGD1561783_predicted | 1.616  | 0.052 | 0.285  | 0.000 | 0.629  | 0.128 | 0.397  | 0.000 |
| 1393183_at   | H33503    | similar to StAR-related protein 1-4E (predicted)                                                                                                     | RGD1561783_predicted | 0.800  | 0.397 | 0.298  | 0.000 | 1.028  | 0.806 | 0.403  | 0.009 |
| 1398588_at   | BE098532  | similar to step II splicing factor SLU7; DNA segment, Chr 11, ERATO Doi 730, expressed; DNA segment, Chr 3, Brigham & Womens Genetics 0878 expressed | LOC303057            | 0.906  | 0.788 | 1.313  | 0.125 | 0.908  | 0.530 | 0.963  | 0.543 |
| 1380226_at   | BG376544  | Similar to Sterile alpha motif domain containing 10 (predicted)                                                                                      | RGD1563203_predicted | 0.707  | 0.172 | 0.730  | 0.099 | 0.842  | 0.040 | 1.019  | 0.854 |
| 1375073_at   | BE107313  | similar to sterile alpha motif domain containing 11 (predicted)                                                                                      | RGD1563779_predicted | 0.807  | 0.275 | 1.189  | 0.045 | 1.015  | 0.058 | 1.225  | 0.018 |
| 1377918_at   | AW526291  | similar to Stomatin-like 1 (predicted)                                                                                                               | RGD1559463_predicted | 1.057  | 0.027 | 0.648  | 0.030 | 1.508  | 0.078 | 0.703  | 0.036 |
| 1373263_at   | AW523737  | similar to SUMO/sentrin specific protease 5 (predicted)                                                                                              | RGD1563140_predicted | 0.506  | 0.305 | 2.942  | 0.001 | 0.713  | 0.962 | 2.738  | 0.004 |
| 1390555_at   | AW530876  | similar to Suppressor of cytokine signaling 5 (predicted)                                                                                            | RGD1564914_predicted | 0.717  | 0.022 | 1.011  | 0.685 | 0.539  | 0.034 | 0.959  | 0.134 |
| 1379271_at   | AA925076  | similar to Suppressor of cytokine signaling 5 (predicted)                                                                                            | RGD1564914_predicted | 0.774  | 0.475 | 1.163  | 0.223 | 0.717  | 0.264 | 1.009  | 0.829 |
| 1375068_at   | AI410604  | Similar to surfeit 5 isoform b (predicted)                                                                                                           | RGD1564893_predicted | 0.664  | 0.635 | 0.967  | 0.803 | 0.597  | 0.045 | 0.997  | 0.536 |
| 1376054_at   | AI103054  | similar to SWAP2                                                                                                                                     | LOC499390            | 0.874  | 0.256 | 1.429  | 0.122 | 2.234  | 0.982 | 1.213  | 0.088 |
| 1371679_at   | BE113393  | similar to Synaptopodin-2 (Myopodin) (predicted)                                                                                                     | RGD1564779_predicted | 0.583  | 0.053 | 0.485  | 0.050 | 0.331  | 0.010 | 0.412  | 0.092 |
| 1384160_at   | AI547837  | similar to Synaptopodin-2 (Myopodin) (predicted)                                                                                                     | RGD1564779_predicted | 1.014  | 0.864 | 4.332  | 0.022 | 0.608  | 0.043 | 1.196  | 0.412 |
| 1388620_at   | AA818192  | similar to Tada3l protein                                                                                                                            | LOC362414            | 1.205  | 0.496 | 0.908  | 0.991 | 0.513  | 0.243 | 0.615  | 0.991 |
| 1380184_at   | AW521222  | Similar to TAF5A (predicted)                                                                                                                         | RGD1562115_predicted | 0.849  | 0.670 | 0.538  | 0.104 | 3.093  | 0.001 | 0.757  | 0.450 |
| 1380925_at   | BF420093  | Similar to talin 2 (predicted)                                                                                                                       | RGD1565416_predicted | 1.812  | 0.011 | 0.998  | 0.875 | 2.082  | 0.029 | 0.942  | 0.661 |
| 1392944_at   | AW251506  | similar to talin 2 (predicted)                                                                                                                       | RGD1565416_predicted | 1.061  | 0.838 | 1.049  | 0.171 | 1.632  | 0.838 | 0.965  | 0.824 |
| 1371381_at   | AI007981  | similar to TBC1 domain family member 4 (predicted)                                                                                                   | RGD1561609_predicted | 0.797  | 0.299 | 0.987  | 0.516 | 0.612  | 0.107 | 0.830  | 0.389 |
| 1378254_at   | BM389480  | similar to TBC1 domain family member 4 (predicted)                                                                                                   | RGD1561609_predicted | 1.013  | 0.919 | 0.841  | 0.472 | 0.712  | 0.147 | 0.638  | 0.194 |
| 1372129_at   | BG378054  | similar to TBC1 domain family, member 8; BUB2-like protein 1; vascular Rab-GAP/TBC-containing (predicted)                                            | RGD1310147_predicted | 1.072  | 0.538 | 0.954  | 0.286 | 1.020  | 0.538 | 0.919  | 0.231 |
| 1373467_at   | BG374179  | similar to TBP-associated factor 172 (TAF-172) (TAF(II)170) (predicted)                                                                              | RGD1564130_predicted | 1.613  | 0.108 | 1.775  | 0.097 | 2.049  | 0.034 | 2.590  | 0.005 |
| 1383429_at   | BI289160  | similar to T-Brain-1                                                                                                                                 | LOC311078            | 0.666  | 0.448 | 1.285  | 0.002 | 0.725  | 0.112 | 1.211  | 0.012 |
| 1394082_at   | BG662631  | similar to T-Brain-1                                                                                                                                 | LOC311078            | 0.564  | 0.747 | 1.165  | 0.380 | 0.399  | 0.555 | 1.060  | 0.668 |
| 1386073_at   | AI043800  | Similar to T-Brain-1                                                                                                                                 | LOC311078            | 0.588  | 0.923 | 1.327  | 0.097 | 0.571  | 0.461 | 1.306  | 0.036 |
| 1379945_at   | AI137329  | similar to T-cell activation kelch repeat protein (predicted)                                                                                        | RGD1563166_predicted | 1.239  | 0.904 | 0.355  | 0.002 | 0.599  | 0.901 | 0.505  | 0.030 |
| 1381570_at   | BI293518  | similar to T-cell activation NFKB-like protein (predicted)                                                                                           | RGD1308055_predicted | 1.613  | 0.224 | 1.248  | 0.034 | 3.797  | 0.015 | 1.524  | 0.046 |
| 1397859_x_at | BI291927  | Similar to T-cell receptor alpha chain (predicted)                                                                                                   | RGD1565851_predicted | 15.986 | 0.000 | 15.027 | 0.000 | 23.435 | 0.000 | 16.985 | 0.000 |
| 1377156_at   | BI273936  | Similar to TCF7L2 protein                                                                                                                            | LOC365486            | 12.088 | 0.001 | 1.035  | 0.913 | 14.076 | 0.008 | 2.796  | 0.053 |
| 1397210_at   | BF396902  | Similar to TCF7L2 protein                                                                                                                            | LOC365486            | 1.068  | 0.978 | 0.984  | 0.090 | 1.702  | 0.047 | 1.006  | 0.872 |
| 1395845_at   | AW534087  | Similar to TEL protein                                                                                                                               | LOC312777            | 1.725  | 0.057 | 1.070  | 0.669 | 2.014  | 0.199 | 1.000  | 0.999 |
| 1385294_at   | BM387000  | similar to TEL protein                                                                                                                               | LOC312777            | 1.754  | 0.181 | 4.807  | 0.010 | 1.063  | 0.840 | 1.905  | 0.087 |
| 1391444_at   | BF285611  | Similar to teratocyte-specific carboxylesterase (predicted)                                                                                          | RGD1564156_predicted | 0.619  | 0.079 | 0.479  | 0.000 | 0.483  | 0.018 | 0.539  | 0.044 |
| 1397569_at   | BF546710  | Similar to teratocyte-specific carboxylesterase (predicted)                                                                                          | RGD1564156_predicted | 0.816  | 0.290 | 0.436  | 0.020 | 0.416  | 0.074 | 0.311  | 0.000 |
| 1372237_at   | BI298306  | Similar to testes development-related NYD-SP22 isoform 1 (predicted)                                                                                 | RGD1561916_predicted | 1.303  | 0.539 | 1.026  | 0.102 | 1.373  | 0.356 | 1.081  | 0.142 |
| 1389679_at   | AI178923  | Similar to testhymen (predicted)                                                                                                                     | RGD1563612_predicted | 0.828  | 0.952 | 0.464  | 0.006 | 0.730  | 0.923 | 0.651  | 0.020 |
| 1389409_at   | AI177869  | similar to Testis derived transcript                                                                                                                 | LOC500040            | 0.637  | 0.938 | 2.419  | 0.008 | 0.477  | 0.821 | 2.019  | 0.059 |
| 1378941_at   | AA957447  | Similar to testis-specific chromodomain Y-like protein                                                                                               | LOC361237            | 1.317  | 0.237 | 1.706  | 0.004 | 1.291  | 0.325 | 1.730  | 0.021 |
| 1374494_at   | AI137375  | Similar to testis-specific chromodomain Y-like protein                                                                                               | LOC361237            | 0.840  | 0.988 | 2.097  | 0.116 | 0.783  | 0.317 | 2.905  | 0.014 |
| 1393496_at   | BF566173  | similar to testis-specific gene                                                                                                                      | LOC500799            | 1.141  | 0.322 | 1.028  | 0.869 | 1.003  | 0.868 | 0.993  | 0.969 |
| 1394949_at   | BF399419  | Similar to TGFB-induced factor 2 (predicted)                                                                                                         | RGD1561562_predicted | 1.001  | 0.626 | 0.653  | 0.299 | 1.586  | 0.429 | 0.565  | 0.067 |

|            |          |                                                                                                                                                                                    |                      |       |       |        |       |       |       |       |       |
|------------|----------|------------------------------------------------------------------------------------------------------------------------------------------------------------------------------------|----------------------|-------|-------|--------|-------|-------|-------|-------|-------|
| 1383428_at | AA923920 | Similar to Thioredoxin domain containing protein 6 (Thioredoxin-like protein 2) (predicted)                                                                                        | RGD1564871_predicted | 1.504 | 0.158 | 1.150  | 0.589 | 1.914 | 0.101 | 1.679 | 0.023 |
| 1382333_at | AI511250 | Similar to THUMP domain containing 3 (predicted)                                                                                                                                   | RGD1560852_predicted | 0.610 | 0.036 | 0.891  | 0.124 | 0.596 | 0.034 | 0.787 | 0.068 |
| 1393317_at | BI303231 | similar to THUMP domain containing 3 (predicted)                                                                                                                                   | RGD1560852_predicted | 0.902 | 0.239 | 1.983  | 0.018 | 0.854 | 0.572 | 1.743 | 0.026 |
| 1382049_at | AW530828 | similar to thymus atrophy-related protein (predicted)                                                                                                                              | RGD1304607_predicted | 0.529 | 0.093 | 0.334  | 0.045 | 0.470 | 0.087 | 0.464 | 0.047 |
| 1376119_at | BE100155 | similar to thyroid adenoma associated (predicted)                                                                                                                                  | RGD1560519_predicted | 0.711 | 0.008 | 1.002  | 0.706 | 0.712 | 0.032 | 0.998 | 0.989 |
| 1397182_at | AI169397 | similar to thyroid hormone receptor interactor 11                                                                                                                                  | LOC314393            | 0.999 | 0.992 | 1.118  | 0.666 | 0.926 | 0.890 | 1.000 | 0.763 |
| 1372324_at | AW253391 | similar to thyroid hormone receptor interactor 3                                                                                                                                   | LOC497975            | 0.785 | 0.113 | 0.684  | 0.731 | 0.673 | 0.217 | 0.993 | 0.309 |
| 1384094_at | BF414316 | Similar to timeless-interacting protein (predicted)                                                                                                                                | RGD1564084_predicted | 1.373 | 0.211 | 1.772  | 0.562 | 0.587 | 0.275 | 0.891 | 0.388 |
| 1371546_at | BI284988 | similar to TR4 orphan receptor associated protein TRA16                                                                                                                            | LOC361128            | 0.641 | 0.034 | 1.754  | 0.061 | 0.535 | 0.014 | 1.653 | 0.072 |
| 1380100_at | AW526268 | similar to Traf2 and NCK interacting kinase, splice variant 4 (predicted)                                                                                                          | RGD1561817_predicted | 0.643 | 0.374 | 0.649  | 0.005 | 0.769 | 0.200 | 0.561 | 0.063 |
| 1396144_at | BF560978 | similar to Traf2 and NCK interacting kinase, splice variant 4 (predicted)                                                                                                          | RGD1561817_predicted | 0.819 | 0.567 | 0.594  | 0.006 | 1.052 | 0.279 | 0.581 | 0.008 |
| 1383805_at | BG666454 | similar to Traf2 and NCK interacting kinase, splice variant 4 (predicted)                                                                                                          | RGD1561817_predicted | 0.878 | 0.684 | 0.479  | 0.017 | 0.831 | 0.521 | 0.288 | 0.019 |
| 1373271_at | AI104034 | similar to trafficking protein particle complex 5 (predicted)                                                                                                                      | RGD1563971_predicted | 0.595 | 0.676 | 1.784  | 0.031 | 0.588 | 0.046 | 1.294 | 0.280 |
| 1377987_at | BI281852 | similar to trafficking protein particle complex 5 (predicted)                                                                                                                      | RGD1563971_predicted | 1.039 | 0.799 | 0.840  | 0.044 | 1.034 | 0.169 | 0.900 | 0.630 |
| 1384313_at | BF412520 | similar to trafficking protein particle complex 5 (predicted)                                                                                                                      | RGD1563971_predicted | 1.032 | 0.853 | 0.615  | 0.116 | 0.943 | 0.168 | 0.710 | 0.134 |
| 1382861_at | AA997486 | similar to transcription elongation factor IIS - mouse                                                                                                                             | LOC498453            | 1.660 | 0.036 | 2.222  | 0.011 | 1.457 | 0.179 | 3.612 | 0.014 |
| 1392658_at | AI230409 | Similar to transcription elongation factor IIS - mouse                                                                                                                             | LOC498453            | 1.718 | 0.120 | 2.428  | 0.003 | 1.978 | 0.158 | 3.054 | 0.000 |
| 1388867_at | AI227852 | similar to transcription factor                                                                                                                                                    | MGC112830            | 0.720 | 0.076 | 0.613  | 0.021 | 0.679 | 0.042 | 0.447 | 0.020 |
| 1388964_at | AI232289 | similar to transcription factor (p38 interacting protein)                                                                                                                          | RGD1307812           | 0.638 | 0.030 | 0.798  | 0.063 | 0.722 | 0.319 | 0.794 | 0.137 |
| 1394699_at | BG671896 | Similar to transcription factor ONECUT2 (predicted)                                                                                                                                | RGD1564677_predicted | 0.860 | 0.424 | 0.884  | 0.610 | 0.707 | 0.552 | 1.216 | 0.125 |
| 1379100_at | BF407311 | similar to transcriptional regulating protein 132 (predicted)                                                                                                                      | RGD1306119_predicted | 1.012 | 0.930 | 16.731 | 0.009 | 1.028 | 0.669 | 3.652 | 0.039 |
| 1389485_at | BE099784 | similar to transformed mouse 3T3 cell double minute 1                                                                                                                              | LOC314859            | 0.686 | 0.212 | 1.112  | 0.523 | 0.563 | 0.119 | 0.808 | 0.368 |
| 1378675_at | BE119678 | similar to transglutaminase E3 (predicted)                                                                                                                                         | RGD1561831_predicted | 1.058 | 0.338 | 0.447  | 0.082 | 1.019 | 0.994 | 0.402 | 0.000 |
| 1398973_at | BI296499 | similar to transmembrane protein TM9SF3 (predicted)                                                                                                                                | RGD1564625_predicted | 0.812 | 0.128 | 0.299  | 0.005 | 0.738 | 0.076 | 0.205 | 0.015 |
| 1395343_at | BF545305 | similar to transmembrane protein TM9SF3 (predicted)                                                                                                                                | RGD1564625_predicted | 0.385 | 0.129 | 1.249  | 0.812 | 0.881 | 0.827 | 1.062 | 0.695 |
| 1379627_at | AW534630 | similar to transmembrane protein TM9SF3 (predicted)                                                                                                                                | RGD1564625_predicted | 1.143 | 0.189 | 0.323  | 0.010 | 0.861 | 0.821 | 0.464 | 0.005 |
| 1371647_at | AA963367 | similar to transmembrane protein TM9SF3 (predicted)                                                                                                                                | RGD1564625_predicted | 0.878 | 0.755 | 0.816  | 0.061 | 0.971 | 0.883 | 0.875 | 0.324 |
| 1383721_at | AI556075 | similar to transmembrane receptor                                                                                                                                                  | MGC112790            | 0.507 | 0.201 | 2.133  | 0.115 | 0.453 | 0.076 | 2.758 | 0.066 |
| 1388821_at | AI010430 | similar to Tribbles homolog 2 (predicted)                                                                                                                                          | RGD1564451_predicted | 0.466 | 0.041 | 0.447  | 0.005 | 0.673 | 0.225 | 0.401 | 0.011 |
| 1390122_at | BI275740 | Similar to triggering receptor expressed on myeloid cells-like 1 (predicted)                                                                                                       | RGD1565175_predicted | 2.150 | 0.010 | 1.465  | 0.016 | 2.272 | 0.003 | 1.493 | 0.041 |
| 1397183_at | BF404362 | Similar to trinucleotide repeat containing 4 (predicted)                                                                                                                           | RGD1563168_predicted | 1.079 | 0.832 | 0.573  | 0.045 | 1.036 | 0.852 | 0.475 | 0.196 |
| 1380769_at | BF394344 | Similar to tripartite motif protein 24 (predicted)                                                                                                                                 | RGD1562133_predicted | 0.870 | 0.994 | 1.332  | 0.751 | 1.398 | 0.030 | 1.041 | 0.518 |
| 1373127_at | BM383645 | Similar to Tripartite motif protein 44 (DIPB protein)                                                                                                                              | LOC502656            | 1.018 | 0.880 | 1.109  | 0.654 | 0.940 | 0.150 | 1.100 | 0.893 |
| 1374017_at | BI289517 | Similar to tripartite motif protein 50 (predicted)                                                                                                                                 | RGD1562778_predicted | 3.057 | 0.006 | 0.343  | 0.028 | 4.558 | 0.005 | 0.274 | 0.028 |
| 1391027_at | AI236184 | Similar to tripartite motif-containing 65 (predicted)                                                                                                                              | RGD1559497_predicted | 1.165 | 0.527 | 1.008  | 0.729 | 0.972 | 0.916 | 0.948 | 0.754 |
| 1388951_at | BI294789 | similar to Trithorax homolog 2 (Mixed lineage leukemia gene homolog 2 protein) (predicted)                                                                                         | RGD1308331_predicted | 1.100 | 0.893 | 1.847  | 0.018 | 0.933 | 0.909 | 1.308 | 0.373 |
| 1376609_at | BG672064 | similar to TRS85 homolog (predicted)                                                                                                                                               | RGD1309102_predicted | 1.072 | 0.531 | 1.119  | 0.444 | 1.118 | 0.623 | 1.058 | 0.437 |
| 1396115_at | BF566051 | Similar to TRS85 homolog (predicted)                                                                                                                                               | RGD1309102_predicted | 0.840 | 0.971 | 0.820  | 0.024 | 1.195 | 0.895 | 0.998 | 0.990 |
| 1389139_at | BG665007 | similar to Ttc15 protein (predicted)                                                                                                                                               | RGD1566054_predicted | 0.521 | 0.008 | 0.414  | 0.000 | 0.653 | 0.034 | 0.671 | 0.006 |
| 1382068_at | AA963991 | similar to tubby super-family protein (predicted)                                                                                                                                  | RGD1564487_predicted | 1.100 | 0.298 | 1.293  | 0.142 | 1.183 | 0.187 | 1.071 | 0.517 |
| 1373718_at | BM384071 | similar to tubulin, beta 2                                                                                                                                                         | LOC498736            | 3.379 | 0.008 | 2.320  | 0.021 | 2.101 | 0.198 | 2.002 | 0.002 |
| 1389108_at | AI710235 | similar to tubulin-specific chaperone d                                                                                                                                            | LOC363309            | 0.612 | 0.216 | 0.360  | 0.000 | 0.631 | 0.011 | 0.390 | 0.004 |
| 1372626_at | AI231999 | Similar to tumor protein D53 (predicted)                                                                                                                                           | RGD1564417_predicted | 0.370 | 0.021 | 0.503  | 0.023 | 0.384 | 0.010 | 0.656 | 0.012 |
| 1393034_at | BI292899 | similar to tyrosine kinase-associated leucine zipper protein LAZipII (predicted)                                                                                                   | RGD1565584_predicted | 1.108 | 0.232 | 1.201  | 0.104 | 1.624 | 0.182 | 1.247 | 0.058 |
| 1379723_at | BG673264 | similar to tyrosine kinase-associated leucine zipper protein LAZipII (predicted)                                                                                                   | RGD1565584_predicted | 1.249 | 0.343 | 0.993  | 0.395 | 1.196 | 0.069 | 1.080 | 0.225 |
| 1376537_at | AW435010 | Similar to Tyrosine-protein phosphatase, non-receptor type 3 (Protein-tyrosine phosphatase H1) (PTP-H1)                                                                            | LOC500465            | 0.575 | 0.784 | 0.765  | 0.289 | 0.866 | 0.405 | 1.006 | 0.971 |
| 1394962_at | AI554981 | Similar to U1 small nuclear ribonucleoprotein subunit, putative (predicted)                                                                                                        | RGD1563251_predicted | 0.994 | 0.560 | 1.022  | 0.846 | 1.001 | 0.798 | 0.948 | 0.833 |
| 1389874_at | BF404554 | similar to U2 small nuclear ribonucleoprotein auxiliary factor 35 kDa subunit related-protein 1 (U2(RNU2) small nuclear RNA auxillary factor 1-like 1) (SP2)                       | LOC498425            | 0.809 | 0.457 | 1.104  | 0.660 | 1.017 | 0.665 | 1.090 | 0.883 |
| 1379590_at | AW527413 | similar to U2 small nuclear ribonucleoprotein auxiliary factor 35 kDa subunit related-protein 1 (U2(RNU2) small nuclear RNA auxillary factor 1-like 1) (SP2)                       | LOC498425            | 1.020 | 0.819 | 1.296  | 0.525 | 0.721 | 0.065 | 0.929 | 0.519 |
| 1375058_at | BF396164 | similar to U2af1-rs2 (predicted)                                                                                                                                                   | RGD1564881_predicted | 0.472 | 0.009 | 0.738  | 0.011 | 0.413 | 0.021 | 0.877 | 0.013 |
| 1394672_at | BF414556 | Similar to U5 snRNP-specific protein (Prp8-binding) (predicted)                                                                                                                    | RGD1309198_predicted | 0.820 | 0.995 | 0.772  | 0.029 | 0.822 | 0.807 | 0.727 | 0.077 |
| 1383202_at | AA818406 | similar to U6 snRNA-associated Sm-like protein LSm6 (Sm protein F) (predicted)                                                                                                     | RGD1561937_predicted | 1.002 | 0.272 | 0.931  | 0.698 | 1.074 | 0.799 | 1.349 | 0.001 |
| 1397874_at | AI548493 | Similar to U7 snRNA-associated Sm-like protein Lsm11 (predicted)                                                                                                                   | RGD1565523_predicted | 0.685 | 0.014 | 0.739  | 0.133 | 0.890 | 0.087 | 0.733 | 0.805 |
| 1375415_at | AI169233 | similar to U7 snRNP-specific Sm-like protein LSM10                                                                                                                                 | LOC366468            | 0.999 | 0.990 | 0.992  | 0.172 | 1.002 | 0.950 | 1.658 | 0.523 |
| 1371764_at | AI411771 | similar to Ubc6p homolog                                                                                                                                                           | MGC94113             | 1.324 | 0.367 | 1.362  | 0.043 | 1.110 | 0.946 | 1.548 | 0.000 |
| 1389016_at | AI029306 | similar to Ubiquitin carboxyl-terminal hydrolase 4 (Ubiquitin thiolesterase 4) (Ubiquitin-specific processing protease 4) (Deubiquitinating enzyme 4) (Ubiquitous nuclear protein) | LOC290864            | 1.025 | 0.882 | 1.719  | 0.047 | 0.956 | 0.832 | 1.129 | 0.360 |
| 1373409_at | BI294738 | similar to ubiquitin protein ligase E3C (predicted)                                                                                                                                | RGD1559986_predicted | 0.617 | 0.126 | 0.601  | 0.008 | 0.564 | 0.002 | 0.605 | 0.007 |
| 1380705_at | AW523627 | Similar to ubiquitin protein ligase E3C (predicted)                                                                                                                                | RGD1559986_predicted | 0.974 | 0.708 | 0.869  | 0.116 | 1.705 | 0.971 | 0.900 | 0.167 |

|              |          |                                                                                                                                                             |                      |       |       |       |       |       |       |       |       |
|--------------|----------|-------------------------------------------------------------------------------------------------------------------------------------------------------------|----------------------|-------|-------|-------|-------|-------|-------|-------|-------|
| 1390183_at   | AI177708 | similar to ubiquitin specific protease 34                                                                                                                   | LOC360990            | 1.362 | 0.019 | 1.074 | 0.110 | 1.174 | 0.054 | 1.165 | 0.059 |
| 1395426_at   | AW142658 | similar to ubiquitin-conjugating enzyme E2 variant 1 (predicted)                                                                                            | RGD1562209_predicted | 1.619 | 0.327 | 1.071 | 0.770 | 1.812 | 0.647 | 0.881 | 0.476 |
| 1388640_at   | BI279654 | similar to Ubiquitin-like protein SMT3A precursor (Ubiquitin-related protein SUMO-2)                                                                        | LOC499417            | 0.507 | 0.245 | 1.061 | 0.095 | 0.404 | 0.003 | 0.891 | 0.762 |
| 1367472_at   | BG153295 | similar to ubiquitin-protein ligase (EC 6.3.2.19) E1 - mouse                                                                                                | LOC314432            | 1.299 | 0.228 | 1.071 | 0.880 | 1.269 | 0.053 | 1.167 | 0.339 |
| 1383522_at   | AI045086 | similar to Ubiquitously transcribed tetratricopeptide repeat gene, X chromosome (predicted)                                                                 | RGD1565134_predicted | 1.240 | 0.454 | 0.997 | 0.562 | 0.953 | 0.874 | 1.286 | 0.373 |
| 1372115_at   | AI408477 | similar to Ubr2 protein (predicted)                                                                                                                         | RGD1561637_predicted | 0.883 | 0.001 | 0.597 | 0.004 | 1.101 | 0.410 | 0.656 | 0.023 |
| 1391304_at   | BM388658 | similar to Ubr2 protein (predicted)                                                                                                                         | RGD1561637_predicted | 1.837 | 0.127 | 1.024 | 0.779 | 1.125 | 0.735 | 1.010 | 0.715 |
| 1381349_a_at | AI231906 | similar to Ubr2 protein (predicted)                                                                                                                         | RGD1561637_predicted | 0.976 | 0.331 | 1.516 | 0.010 | 0.837 | 0.199 | 1.386 | 0.097 |
| 1389260_at   | AI008393 | similar to UBX domain-containing protein 1                                                                                                                  | LOC363332            | 1.134 | 0.753 | 1.407 | 0.349 | 1.146 | 0.983 | 2.180 | 0.018 |
| 1377572_at   | AW434912 | similar to UDP-glucose ceramide glucosyltransferase-like 2 (predicted)                                                                                      | RGD1563520_predicted | 0.627 | 0.312 | 0.482 | 0.086 | 0.996 | 0.252 | 0.612 | 0.143 |
| 1379910_at   | AI136097 | similar to UDP-N-actetylglucosamine pyrophosphorylase 1 homolog (predicted)                                                                                 | RGD1561967_predicted | 1.422 | 0.007 | 1.772 | 0.020 | 2.203 | 0.000 | 2.275 | 0.023 |
| 1378642_at   | AI112858 | similar to uncharacterized hypothalamus protein HT013 (predicted)                                                                                           | RGD1307071_predicted | 0.777 | 0.586 | 2.010 | 0.019 | 1.471 | 0.207 | 2.017 | 0.015 |
| 1383643_at   | BI282584 | similar to UPF0197 protein C11orf10 homolog (predicted)                                                                                                     | RGD1560328_predicted | 0.794 | 0.071 | 1.030 | 0.761 | 0.472 | 0.046 | 1.002 | 0.301 |
| 1390110_at   | BG372998 | similar to Uridine-cytidine kinase 1-like 1 (predicted)                                                                                                     | RGD1565465_predicted | 0.721 | 0.158 | 1.069 | 0.432 | 0.819 | 0.121 | 1.067 | 0.747 |
| 1380038_at   | BF393567 | similar to vacuolar protein sorting 13C protein (predicted)                                                                                                 | RGD1560364_predicted | 1.050 | 0.973 | 0.986 | 0.985 | 1.001 | 0.996 | 0.997 | 0.967 |
| 1377145_at   | BI296089 | similar to very large G-protein coupled receptor 1 (predicted)                                                                                              | RGD1562101_predicted | 1.133 | 0.048 | 0.993 | 0.846 | 0.996 | 0.997 | 1.061 | 0.994 |
| 1393304_at   | BF386764 | Similar to vesicle transport through interaction with t-SNAREs 1B homolog (predicted)                                                                       | RGD1560475_predicted | 0.975 | 0.785 | 1.462 | 0.011 | 1.006 | 0.984 | 1.179 | 0.247 |
| 1373145_at   | BI281884 | similar to Vps41 protein (predicted)                                                                                                                        | RGD1560511_predicted | 0.775 | 0.280 | 0.618 | 0.006 | 0.884 | 0.249 | 0.767 | 0.023 |
| 1397512_at   | BI281965 | similar to Vps41 protein (predicted)                                                                                                                        | RGD1560511_predicted | 0.979 | 0.779 | 0.768 | 0.679 | 1.018 | 0.567 | 0.847 | 0.313 |
| 1397824_at   | BG665671 | similar to WAC (predicted)                                                                                                                                  | RGD1562407_predicted | 2.210 | 0.066 | 1.500 | 0.626 | 3.096 | 0.047 | 1.062 | 0.807 |
| 1375644_at   | AI170561 | similar to WAC (predicted)                                                                                                                                  | RGD1562093_predicted | 1.800 | 0.181 | 2.208 | 0.005 | 1.753 | 0.258 | 1.612 | 0.005 |
| 1393686_at   | AA818655 | Similar to WAC (predicted)                                                                                                                                  | RGD1562407_predicted | 1.389 | 0.394 | 0.923 | 0.204 | 1.412 | 0.162 | 0.813 | 0.145 |
| 1391272_at   | H33448   | Similar to WAP four-disulfide core domain protein 8 precursor (Putative protease inhibitor WAP8)                                                            | LOC499942            | 2.798 | 0.525 | 0.955 | 0.994 | 1.229 | 0.847 | 1.011 | 0.996 |
| 1374669_at   | AI600234 | similar to WD repeat domain 11                                                                                                                              | LOC309016            | 0.756 | 0.342 | 0.622 | 0.200 | 0.689 | 0.233 | 0.553 | 0.075 |
| 1382489_at   | BE116698 | similar to WD repeat domain 11 protein (predicted)                                                                                                          | RGD1564964_predicted | 1.365 | 0.644 | 1.247 | 0.078 | 0.906 | 0.767 | 1.218 | 0.043 |
| 1391524_at   | BE107185 | similar to WD repeat domain 11 protein (predicted)                                                                                                          | RGD1564964_predicted | 0.983 | 0.705 | 1.100 | 0.545 | 1.037 | 0.900 | 1.163 | 0.928 |
| 1378318_at   | BF420065 | similar to WD repeat domain 53 (predicted)                                                                                                                  | RGD1559546_predicted | 0.809 | 0.745 | 1.254 | 0.041 | 1.004 | 0.970 | 1.277 | 0.035 |
| 1386580_at   | AW142797 | similar to Wdr8 protein                                                                                                                                     | LOC366515            | 0.639 | 0.636 | 1.188 | 0.101 | 0.970 | 0.605 | 0.899 | 0.669 |
| 1390811_at   | BI290344 | similar to Wdr8 protein                                                                                                                                     | LOC366515            | 0.709 | 0.981 | 1.240 | 0.314 | 0.627 | 0.211 | 1.470 | 0.001 |
| 1388709_at   | BF284695 | similar to WD-repeat protein 43                                                                                                                             | LOC362703            | 0.505 | 0.288 | 1.064 | 0.721 | 0.729 | 0.150 | 1.149 | 0.090 |
| 1382679_at   | BF396190 | similar to WD-repeat protein 43                                                                                                                             | LOC362703            | 0.726 | 0.433 | 2.907 | 0.006 | 0.759 | 0.323 | 2.598 | 0.005 |
| 1383376_at   | AI717529 | similar to Williams-Beuren syndrome critical region protein 18                                                                                              | LOC368190            | 1.220 | 0.379 | 0.866 | 0.252 | 1.080 | 0.359 | 1.204 | 0.938 |
| 1380745_at   | AA900859 | Similar to Wilms tumor 1-associating protein (WT1-associated protein) homolog (predicted)                                                                   | RGD1563824_predicted | 1.161 | 0.097 | 1.814 | 0.062 | 1.460 | 0.181 | 1.243 | 0.052 |
| 1382175_at   | AW534129 | Similar to Wilms tumor 1-associating protein (WT1-associated protein) homolog (predicted)                                                                   | RGD1563824_predicted | 1.156 | 0.400 | 2.573 | 0.000 | 0.748 | 0.210 | 2.422 | 0.000 |
| 1391339_at   | BI304052 | Similar to Wilms tumor 1-associating protein (WT1-associated protein) homolog (predicted)                                                                   | RGD1563824_predicted | 0.991 | 0.982 | 1.296 | 0.747 | 1.315 | 0.466 | 1.170 | 0.331 |
| 1390733_at   | BI275867 | Similar to WW domain-containing oxidoreductase isoform 2 (predicted)                                                                                        | RGD1565791_predicted | 1.158 | 0.770 | 0.726 | 0.392 | 0.867 | 0.772 | 1.117 | 0.838 |
| 1377183_at   | BE098555 | Similar to WW-domain oxidoreductase (predicted)                                                                                                             | RGD1564231_predicted | 0.764 | 0.000 | 0.490 | 0.063 | 0.773 | 0.075 | 0.181 | 0.002 |
| 1388941_at   | AI172403 | similar to X83328 protein                                                                                                                                   | RGD1304846           | 0.566 | 0.071 | 0.935 | 0.342 | 0.384 | 0.014 | 1.326 | 0.060 |
| 1376300_at   | BI289802 | similar to X83328 protein                                                                                                                                   | RGD1304846           | 0.996 | 0.984 | 0.280 | 0.003 | 0.952 | 0.989 | 0.458 | 0.004 |
| 1380102_at   | BM386836 | similar to XAP-5 protein (predicted)                                                                                                                        | RGD1560964_predicted | 0.484 | 0.015 | 0.829 | 0.285 | 0.342 | 0.003 | 0.860 | 0.051 |
| 1384354_at   | BI288653 | similar to X-linked lymphocyte regulated gene 4 (predicted)                                                                                                 | RGD1565442_predicted | 1.053 | 0.731 | 1.317 | 0.166 | 1.739 | 0.104 | 1.301 | 0.033 |
| 1373980_at   | AW916138 | similar to XPA binding protein 1 (predicted)                                                                                                                | RGD1564506_predicted | 0.894 | 0.129 | 1.684 | 0.005 | 0.726 | 0.044 | 1.537 | 0.018 |
| 1373941_at   | BE103152 | similar to YEATS domain containing 2 (predicted)                                                                                                            | RGD1566176_predicted | 1.103 | 0.498 | 1.070 | 0.115 | 1.093 | 0.799 | 1.033 | 0.687 |
| 1373149_at   | BF285344 | similar to yippee-like 3 (predicted)                                                                                                                        | RGD1564579_predicted | 0.852 | 0.066 | 0.538 | 0.042 | 0.447 | 0.048 | 0.485 | 0.006 |
| 1372840_at   | AI170289 | Similar to Zbed4 protein (predicted)                                                                                                                        | RGD1560093_predicted | 1.340 | 0.074 | 1.624 | 0.731 | 0.913 | 0.862 | 1.060 | 0.259 |
| 1379461_at   | BE120147 | similar to ZFP (predicted)                                                                                                                                  | RGD1559144_predicted | 1.354 | 0.047 | 0.838 | 0.089 | 1.563 | 0.018 | 0.766 | 0.238 |
| 1393105_at   | BF288164 | similar to zinc finger protein (predicted)                                                                                                                  | RGD1562173_predicted | 0.425 | 0.064 | 1.002 | 0.454 | 0.395 | 0.064 | 0.909 | 0.204 |
| 1379104_at   | BF400861 | Similar to zinc finger protein 120 isoform 1 (predicted)                                                                                                    | RGD1562845_predicted | 1.089 | 0.018 | 1.442 | 0.073 | 1.305 | 0.372 | 2.017 | 0.000 |
| 1389709_at   | AI146063 | similar to Zinc finger protein 133                                                                                                                          | LOC499900            | 1.284 | 0.621 | 1.697 | 0.127 | 0.830 | 0.769 | 1.686 | 0.117 |
| 1396104_at   | BF405150 | Similar to Zinc finger protein 184 (predicted)                                                                                                              | RGD1305084_predicted | 1.022 | 0.970 | 0.878 | 0.840 | 1.475 | 0.003 | 0.959 | 0.867 |
| 1367547_at   | BM388010 | similar to zinc finger protein 198                                                                                                                          | LOC305913            | 1.220 | 0.092 | 1.153 | 0.189 | 1.380 | 0.127 | 1.094 | 0.318 |
| 1381733_at   | BF404543 | Similar to zinc finger protein 198                                                                                                                          | LOC305913            | 1.252 | 0.451 | 0.854 | 0.876 | 1.613 | 0.310 | 0.986 | 0.862 |
| 1393363_at   | AI111670 | similar to zinc finger protein 198                                                                                                                          | LOC305913            | 1.210 | 0.489 | 1.053 | 0.526 | 0.653 | 0.933 | 0.920 | 0.595 |
| 1380186_at   | AI101272 | Similar to Zinc finger protein 198 (Fused in myeloproliferative disorders protein) (Rearranged in atypical myeloproliferative disorder protein) (predicted) | RGD1306353_predicted | 2.024 | 0.012 | 1.257 | 0.092 | 3.618 | 0.007 | 1.281 | 0.044 |
| 1382736_at   | AI407047 | Similar to Zinc finger protein 198 (Fused in myeloproliferative disorders protein) (Rearranged in atypical myeloproliferative disorder protein) (predicted) | RGD1306353_predicted | 4.010 | 0.019 | 1.982 | 0.006 | 4.764 | 0.000 | 1.489 | 0.015 |
| 1390189_at   | BF398121 | similar to Zinc finger protein 277                                                                                                                          | LOC298977            | 1.247 | 0.445 | 1.643 | 0.067 | 1.278 | 0.393 | 2.032 | 0.011 |
| 1382228_at   | BE095590 | similar to Zinc finger protein 431 (predicted)                                                                                                              | RGD1565971_predicted | 0.777 | 0.064 | 0.616 | 0.009 | 0.902 | 0.533 | 0.582 | 0.006 |
| 1389657_at   | AI175762 | similar to zinc finger protein 524 (predicted)                                                                                                              | RGD1565485_predicted | 1.077 | 0.722 | 1.123 | 0.090 | 0.995 | 0.992 | 0.983 | 0.992 |
| 1389366_at   | BI293689 | similar to Zinc finger protein 553 (predicted)                                                                                                              | RGD1561639_predicted | 0.687 | 0.005 | 1.616 | 0.005 | 0.901 | 0.277 | 1.327 | 0.019 |



|              |           |                                                                                                                       |                                                  |       |       |       |       |       |       |       |       |
|--------------|-----------|-----------------------------------------------------------------------------------------------------------------------|--------------------------------------------------|-------|-------|-------|-------|-------|-------|-------|-------|
| 1397757_at   | AW523345  | Similar to zinc finger protein 560 (predicted)                                                                        | RGD1565847_predicted                             | 0.774 | 0.699 | 0.573 | 0.005 | 1.222 | 0.190 | 0.807 | 0.170 |
| 1393247_at   | BI298190  | Similar to zinc finger protein 560 (predicted)                                                                        | RGD1565847_predicted                             | 1.529 | 0.931 | 0.673 | 0.017 | 1.057 | 0.316 | 0.935 | 0.498 |
| 1375859_a_at | BM386823  | Similar to zinc finger protein 565 (predicted)                                                                        | RGD1560682_predicted                             | 1.126 | 0.406 | 1.495 | 0.027 | 0.925 | 0.552 | 1.144 | 0.636 |
| 1389631_at   | AA943109  | Similar to zinc finger protein 609 (predicted)                                                                        | RGD1561651_predicted                             | 0.818 | 0.907 | 0.833 | 0.002 | 1.202 | 0.474 | 0.857 | 0.017 |
| 1390739_at   | BE118828  | similar to zinc finger protein 609 /// similar to zinc finger protein 609 (predicted)                                 | LOC315766 ///<br>RGD1561651_predicted            | 2.344 | 0.271 | 1.803 | 0.136 | 2.901 | 0.077 | 0.655 | 0.590 |
| 1398663_at   | AI030120  | similar to zinc finger protein 61                                                                                     | LOC499094                                        | 1.115 | 0.264 | 0.628 | 0.021 | 1.066 | 0.374 | 0.524 | 0.046 |
| 1386793_at   | BF552772  | similar to zinc finger protein 61                                                                                     | LOC499094                                        | 1.171 | 0.288 | 0.464 | 0.017 | 0.954 | 0.798 | 0.404 | 0.006 |
| 1380810_at   | BE102637  | Similar to zinc finger protein 610 (predicted)                                                                        | RGD1560769_predicted                             | 0.399 | 0.002 | 0.464 | 0.003 | 0.606 | 0.048 | 0.675 | 0.108 |
| 1392198_at   | BF398283  | Similar to zinc finger protein 610 (predicted)                                                                        | RGD1560769_predicted                             | 1.162 | 0.571 | 0.648 | 0.075 | 0.688 | 0.664 | 0.710 | 0.078 |
| 1379029_at   | BI284478  | Similar to Zinc finger protein 62 homolog (Zfp-62) (ZT3) (predicted)                                                  | RGD1560191_predicted                             | 1.226 | 0.174 | 1.410 | 0.681 | 1.090 | 0.197 | 1.407 | 0.761 |
| 1396175_at   | BG670617  | similar to Zinc finger protein 62 homolog (Zfp-62) (ZT3) (predicted)                                                  | RGD1560191_predicted                             | 1.497 | 0.724 | 1.023 | 0.426 | 1.192 | 0.791 | 1.242 | 0.218 |
| 1383538_at   | BF545850  | similar to zinc finger protein 650 (predicted)                                                                        | RGD1565257_predicted                             | 0.644 | 0.126 | 0.419 | 0.000 | 0.635 | 0.005 | 0.342 | 0.016 |
| 1382602_at   | BE120211  | similar to zinc finger protein 650 (predicted)                                                                        | RGD1565257_predicted                             | 0.800 | 0.129 | 0.388 | 0.001 | 0.828 | 0.069 | 0.383 | 0.009 |
| 1375059_at   | AI178854  | similar to zinc finger protein 652 (predicted)                                                                        | RGD1566329_predicted                             | 0.547 | 0.023 | 0.994 | 0.071 | 0.630 | 0.197 | 1.019 | 0.922 |
| 1393461_at   | BM392157  | Similar to zinc finger protein 75 (predicted)                                                                         | RGD1565419_predicted                             | 0.787 | 0.050 | 0.988 | 0.903 | 1.053 | 0.873 | 1.000 | 0.638 |
| 1377501_at   | BM383704  | similar to zinc finger protein 75 (predicted)                                                                         | RGD1565419_predicted                             | 1.966 | 0.103 | 1.012 | 0.648 | 1.346 | 0.676 | 0.647 | 0.684 |
| 1378973_at   | BF396260  | Similar to zinc finger protein Cezanne; cellular zinc finger anti-NF-kappaB Cezanne (predicted)                       | RGD1308111_predicted                             | 2.651 | 0.041 | 3.053 | 0.027 | 1.476 | 0.179 | 2.283 | 0.049 |
| 1383311_at   | AI716026  | Similar to zinc finger protein Cezanne; cellular zinc finger anti-NF-kappaB Cezanne (predicted)                       | RGD1308111_predicted                             | 2.481 | 0.068 | 1.601 | 0.081 | 2.374 | 0.084 | 1.321 | 0.274 |
| 1374348_at   | BG373082  | Similar to zinc finger protein Cezanne; cellular zinc finger anti-NF-kappaB Cezanne (predicted)                       | RGD1308111_predicted                             | 1.172 | 0.083 | 1.005 | 0.785 | 1.087 | 0.548 | 1.080 | 0.253 |
| 1395651_at   | AI511118  | Similar to zinc finger protein Cezanne; cellular zinc finger anti-NF-kappaB Cezanne (predicted)                       | RGD1308111_predicted                             | 1.019 | 0.163 | 0.497 | 0.024 | 1.251 | 0.281 | 0.501 | 0.022 |
| 1391507_at   | BF417765  | similar to zinc finger protein EZI                                                                                    | LOC500110                                        | 0.956 | 0.977 | 0.893 | 0.257 | 1.018 | 0.847 | 0.927 | 0.530 |
| 1391130_at   | BI284481  | similar to Zinc finger protein OZF (POZF-1)                                                                           | RGD1308782                                       | 1.035 | 0.713 | 1.001 | 0.988 | 0.998 | 0.994 | 1.000 | 0.997 |
| 1385536_at   | AI454433  | Similar to zinc finger protein ZFP235 (predicted)                                                                     | RGD1560762_predicted                             | 2.025 | 0.075 | 1.183 | 0.421 | 0.641 | 0.172 | 3.193 | 0.154 |
| 1382453_at   | BE118707  | Similar to Zinc finger protein ZIC 3 (Zinc finger protein of the cerebellum 3) (predicted)                            | RGD1561261_predicted                             | 1.121 | 0.732 | 1.567 | 0.273 | 1.235 | 0.696 | 1.658 | 0.365 |
| 1384769_a_at | AI136549  | similar to Zinc finger X-linked protein ZXDB (predicted) /// similar to Zinc finger X-linked protein ZXDB (predicted) | RGD1563355_predicted ///<br>RGD1563156_predicted | 0.767 | 0.234 | 1.458 | 0.022 | 1.082 | 0.878 | 1.179 | 0.046 |
| 1372989_at   | BI296586  | similar to zinc finger, DHHC domain containing 14                                                                     | LOC499014                                        | 1.141 | 0.054 | 1.746 | 0.005 | 1.009 | 0.072 | 2.053 | 0.003 |
| 1374949_at   | BM385443  | similar to Zinc finger, FYVE domain containing 19                                                                     | LOC499871                                        | 1.009 | 0.928 | 1.988 | 0.004 | 1.409 | 0.415 | 1.760 | 0.020 |
| 1389509_at   | BE097016  | Sin3A associated protein 130 (predicted)                                                                              | Sap130_predicted                                 | 0.616 | 0.063 | 0.871 | 0.113 | 0.431 | 0.050 | 0.903 | 0.163 |
| 1392465_at   | AI228030  | sin3-associated polypeptide, 18kDa                                                                                    | Sap18                                            | 0.667 | 0.271 | 1.303 | 0.024 | 0.548 | 0.051 | 1.093 | 0.072 |
| 1374904_at   | AI175048  | sine oculis homeobox homolog 1 (Drosophila)                                                                           | Six1                                             | 1.647 | 0.466 | 1.501 | 0.689 | 1.256 | 0.038 | 0.882 | 0.668 |
| 1374080_at   | AI407118  | sine oculis-related homeobox 5 homolog (Drosophila) (predicted)                                                       | Six5_predicted                                   | 0.961 | 0.178 | 0.783 | 0.667 | 0.963 | 0.996 | 1.002 | 0.998 |
| 1378605_at   | AA818702  | single immunoglobulin and toll-interleukin 1 receptor (TIR) domain                                                    | Sigirr                                           | 0.591 | 0.386 | 0.646 | 0.372 | 0.647 | 0.215 | 1.030 | 0.900 |
| 1368517_at   | NM_053358 | single stranded DNA binding protein 3                                                                                 | Ssbp3                                            | 1.862 | 0.005 | 1.482 | 0.009 | 2.046 | 0.004 | 1.357 | 0.052 |
| 1372793_at   | BE108903  | single-stranded DNA binding protein 1                                                                                 | Ssbp1                                            | 0.470 | 0.011 | 0.587 | 0.004 | 0.570 | 0.062 | 0.817 | 0.069 |
| 1394884_s_at | AI171809  | single-stranded DNA binding protein 1                                                                                 | Ssbp1                                            | 0.622 | 0.082 | 0.730 | 0.018 | 0.683 | 0.125 | 0.752 | 0.065 |
| 1375413_at   | AA799614  | sirtuin (silent mating type information regulation 2 homolog) 2 (S. cerevisiae)                                       | Sirt2                                            | 0.850 | 0.897 | 1.614 | 0.115 | 1.178 | 0.296 | 1.924 | 0.000 |
| 1388925_at   | AI171547  | sirtuin 5 (silent mating type information regulation 2 homolog) 5 (S. cerevisiae)                                     | Sirt5                                            | 0.887 | 0.840 | 1.621 | 0.025 | 0.783 | 0.361 | 1.174 | 0.068 |
| 1388638_at   | AW525725  | sirtuin 6 (silent mating type information regulation 2, homolog) 6 (S. cerevisiae)                                    | Sirt6                                            | 0.937 | 0.883 | 1.073 | 0.631 | 0.782 | 0.297 | 1.070 | 0.931 |
| 1372933_at   | AA892780  | Sirtuin 7 (silent mating type information regulation 2, homolog) 7 (S. cerevisiae) (predicted)                        | Sirt7_predicted                                  | 0.936 | 0.909 | 1.442 | 0.050 | 0.701 | 0.056 | 1.101 | 0.318 |
| 1393706_at   | BE109939  | six transmembrane epithelial antigen of the prostate 1 (predicted)                                                    | Steap1_predicted                                 | 1.002 | 0.245 | 1.366 | 0.969 | 0.790 | 0.993 | 1.398 | 0.978 |
| 1387262_at   | NM_031119 | Sjogren syndrome antigen B                                                                                            | Ssb                                              | 1.001 | 0.115 | 0.959 | 0.184 | 1.068 | 0.399 | 0.956 | 0.366 |
| 1388655_at   | AW252465  | Sjogren's syndrome nuclear autoantigen 1 (predicted)                                                                  | Ssna1_predicted                                  | 0.692 | 0.481 | 1.354 | 0.190 | 0.330 | 0.015 | 1.317 | 0.283 |
| 1383138_at   | AI578268  | slingshot homolog 3 (Drosophila)                                                                                      | Ssh3                                             | 0.867 | 0.553 | 0.879 | 0.391 | 1.398 | 0.836 | 0.905 | 0.141 |
| 1383231_at   | AA955078  | Smad nuclear interacting protein 1                                                                                    | Snip1                                            | 1.128 | 0.127 | 1.581 | 0.025 | 0.746 | 0.081 | 1.463 | 0.058 |
| 1398420_at   | BF393807  | SMAD specific E3 ubiquitin protein ligase 2 (predicted)                                                               | Smurf2_predicted                                 | 1.636 | 0.000 | 1.866 | 0.003 | 1.541 | 0.132 | 1.312 | 0.018 |
| 1372734_at   | AI408095  | small cell adhesion glycoprotein                                                                                      | Smagp                                            | 5.081 | 0.026 | 5.604 | 0.004 | 3.204 | 0.090 | 4.519 | 0.002 |
| 1388467_at   | BG378576  | small glutamine-rich tetratricopeptide repeat (TPR)-containing, alpha                                                 | Sgta                                             | 0.993 | 0.104 | 1.046 | 0.460 | 0.847 | 0.927 | 0.990 | 0.897 |
| 1377920_at   | AI413026  | Small glutamine-rich tetratricopeptide repeat (TPR)-containing, beta                                                  | Sgtb                                             | 1.525 | 0.009 | 2.630 | 0.007 | 1.524 | 0.029 | 1.030 | 0.954 |
| 1374279_at   | BI288244  | small inducible cytokine subfamily E, member 1                                                                        | Scye1                                            | 0.858 | 0.819 | 1.942 | 0.004 | 0.670 | 0.052 | 1.679 | 0.003 |
| 1379810_at   | AI454911  | small inducible cytokine subfamily E, member 1                                                                        | Scye1                                            | 0.952 | 0.975 | 2.060 | 0.003 | 0.966 | 0.969 | 2.086 | 0.006 |
| 1379320_at   | AI102591  | Small nuclear ribonucleoprotein D1 (predicted)                                                                        | Snrpd1_predicted                                 | 0.674 | 0.016 | 1.408 | 0.068 | 0.668 | 0.094 | 1.460 | 0.001 |
| 1383107_at   | BG670306  | small nuclear ribonucleoprotein D1 (predicted)                                                                        | Snrpd1_predicted                                 | 0.849 | 0.071 | 1.341 | 0.016 | 0.740 | 0.036 | 1.112 | 0.036 |
| 1371341_at   | BG372885  | small nuclear ribonucleoprotein D2 (predicted)                                                                        | Snrpd2_predicted                                 | 0.802 | 0.573 | 1.617 | 0.091 | 0.566 | 0.022 | 1.354 | 0.173 |
| 1372333_at   | BF555033  | small nuclear ribonucleoprotein E (predicted) /// similar to small nuclear ribonucleoprotein E (predicted)            | Snrpe_predicted ///<br>RGD1565878_predicted      | 1.153 | 0.699 | 1.330 | 0.248 | 0.882 | 0.284 | 1.251 | 0.034 |
| 1388259_at   | M29294    | small nuclear ribonucleoprotein N                                                                                     | Snrpn                                            | 0.458 | 0.281 | 0.676 | 0.021 | 0.477 | 0.172 | 0.693 | 0.064 |
| 1368098_a_at | M29294    | small nuclear ribonucleoprotein N                                                                                     | Snrpn                                            | 0.586 | 0.356 | 0.654 | 0.062 | 0.497 | 0.029 | 0.638 | 0.053 |
| 1369085_s_at | NM_130738 | small nuclear ribonucleoprotein N /// SNRPN upstream reading frame                                                    | Snrpn /// Snurf                                  | 0.671 | 0.234 | 0.517 | 0.091 | 0.420 | 0.156 | 0.458 | 0.040 |
| 1389446_at   | AI576586  | small nuclear ribonucleoprotein polypeptide A' (predicted)                                                            | Snrpa1_predicted                                 | 1.116 | 0.434 | 3.092 | 0.006 | 1.163 | 0.452 | 2.492 | 0.008 |



|              |           |                                                                                                         |                    |       |       |        |       |       |       |       |       |
|--------------|-----------|---------------------------------------------------------------------------------------------------------|--------------------|-------|-------|--------|-------|-------|-------|-------|-------|
| 1388117_at   | AI411893  | Small nuclear ribonucleoprotein polypeptides B and B1                                                   | Snrpb              | 1.002 | 0.577 | 1.037  | 0.781 | 1.049 | 0.770 | 1.089 | 0.137 |
| 1397294_at   | AW529486  | Small nuclear ribonucleoprotein polypeptides B and B1                                                   | Snrpb              | 0.968 | 0.865 | 0.804  | 0.235 | 0.882 | 0.245 | 1.003 | 0.993 |
| 1380265_at   | BI294596  | small nuclear RNA activating complex, polypeptide 1 (predicted)                                         | Snape1_predicted   | 0.792 | 0.795 | 0.870  | 0.243 | 0.654 | 0.096 | 1.051 | 0.730 |
| 1393161_at   | AW916962  | small nuclear RNA activating complex, polypeptide 3                                                     | Snape3             | 1.134 | 0.605 | 1.548  | 0.002 | 1.191 | 0.464 | 1.850 | 0.005 |
| 1389641_at   | BE349788  | small nuclear RNA activating complex, polypeptide 4 (predicted)                                         | Snape4_predicted   | 0.830 | 0.697 | 1.457  | 0.005 | 0.882 | 0.410 | 0.983 | 0.868 |
| 1389792_at   | BE329471  | Small optic lobes homolog (Drosophila) (predicted)                                                      | Solh_predicted     | 0.747 | 0.366 | 1.390  | 0.130 | 0.945 | 0.290 | 1.350 | 0.130 |
| 1393041_at   | AW535052  | SMC2 structural maintenance of chromosomes 2-like 1 (yeast) (predicted)                                 | Smc211_predicted   | 0.767 | 0.333 | 1.271  | 0.210 | 0.772 | 0.040 | 1.104 | 0.576 |
| 1383008_at   | AW535494  | SMC4 structural maintenance of chromosomes 4-like 1 (yeast)                                             | Smc411             | 0.922 | 0.522 | 1.473  | 0.433 | 0.600 | 0.151 | 0.681 | 0.018 |
| 1380257_at   | BF419367  | SMC5 structural maintenance of chromosomes 5-like 1 (yeast) (predicted)                                 | Smc511_predicted   | 2.071 | 0.071 | 7.298  | 0.015 | 1.621 | 0.382 | 3.653 | 0.035 |
| 1390534_at   | BG374727  | SMC5 structural maintenance of chromosomes 5-like 1 (yeast) (predicted)                                 | Smc511_predicted   | 1.109 | 0.091 | 0.976  | 0.651 | 1.098 | 0.709 | 1.364 | 0.479 |
| 1382790_at   | AI639485  | SMC5 structural maintenance of chromosomes 5-like 1 (yeast) (predicted)                                 | Smc511_predicted   | 0.947 | 0.630 | 1.143  | 0.517 | 0.874 | 0.644 | 1.305 | 0.315 |
| 1378178_at   | AA850777  | SMC6 structural maintenance of chromosomes 6-like 1 (yeast) (predicted)                                 | Smc611_predicted   | 1.554 | 0.096 | 1.230  | 0.041 | 1.507 | 0.106 | 0.924 | 0.063 |
| 1399095_at   | AI407918  | SMT3 suppressor of mif two 3 homolog 1 (yeast)                                                          | Sumo1              | 1.084 | 0.664 | 0.962  | 0.849 | 1.193 | 0.369 | 1.191 | 0.133 |
| 1367452_at   | NM_133594 | SMT3 suppressor of mif two 3 homolog 2 (yeast)                                                          | Sumo2              | 0.928 | 0.119 | 0.895  | 0.516 | 0.841 | 0.208 | 0.969 | 0.085 |
| 1367935_at   | NM_057195 | smu-1 suppressor of mec-8 and unc-52 homolog (C. elegans)                                               | Smu1               | 0.750 | 0.139 | 0.977  | 0.628 | 0.712 | 0.001 | 0.991 | 0.911 |
| 1382006_at   | AA996892  | SNAP-associated protein                                                                                 | Snapap             | 0.755 | 0.017 | 0.710  | 0.028 | 0.799 | 0.062 | 0.799 | 0.351 |
| 1376366_at   | BI278753  | SNAP-associated protein                                                                                 | Snapap             | 0.999 | 0.472 | 0.702  | 0.000 | 0.914 | 0.996 | 0.877 | 0.241 |
| 1368596_at   | NM_021693 | SNF1-like kinase                                                                                        | Snf11k             | 0.579 | 0.008 | 0.352  | 0.001 | 0.570 | 0.032 | 0.326 | 0.001 |
| 1391834_at   | BM386419  | Snf7 homologue associated with Alix 3                                                                   | MGC108776          | 1.041 | 0.853 | 0.303  | 0.021 | 1.011 | 0.992 | 0.596 | 0.076 |
| 1372581_at   | BF282487  | SNF8, ESCRT-II complex subunit, homolog (S. cerevisiae)                                                 | Snf8               | 0.660 | 0.059 | 0.830  | 0.064 | 0.772 | 0.012 | 0.723 | 0.096 |
| 1395406_at   | BF552212  | Sno, strawberry notch homolog 1 (Drosophila)                                                            | Sbno1              | 0.746 | 0.339 | 1.795  | 0.030 | 1.244 | 0.743 | 1.785 | 0.020 |
| 1389309_at   | AW251323  | sno, strawberry notch homolog 1 (Drosophila)                                                            | Sbno1              | 1.019 | 0.824 | 2.096  | 0.000 | 1.233 | 0.163 | 2.153 | 0.006 |
| 1379307_at   | BF283256  | sodium channel associated protein 1                                                                     | Sap1               | 0.656 | 0.020 | 0.866  | 0.206 | 0.651 | 0.046 | 1.127 | 0.461 |
| 1373377_at   | BG376162  | sodium channel modifier 1 (predicted)                                                                   | Scnm1_predicted    | 0.840 | 0.790 | 1.365  | 0.220 | 0.707 | 0.100 | 0.961 | 0.837 |
| 1369691_at   | NM_013119 | sodium channel, voltage-gated, type III, alpha polypeptide                                              | Scn3a              | 1.225 | 0.648 | 0.503  | 0.046 | 1.067 | 0.747 | 0.541 | 0.006 |
| 1383435_at   | BF542912  | sodium channel, voltage-gated, type III, beta                                                           | Scn3b              | 1.751 | 0.146 | 0.418  | 0.019 | 1.950 | 0.533 | 0.441 | 0.079 |
| 1370850_at   | AA685184  | sodium channel, voltage-gated, type III, beta                                                           | Scn3b              | 0.979 | 0.832 | 0.359  | 0.000 | 1.276 | 0.114 | 0.537 | 0.016 |
| 1370973_at   | BF285019  | sodium channel, voltage-gated, type VII, alpha                                                          | Scn7a              | 1.113 | 0.826 | 0.259  | 0.042 | 1.588 | 0.403 | 0.291 | 0.039 |
| 1369693_a_at | NM_017215 | solute carrier family 1 (glial high affinity glutamate transporter), member 2                           | Slc1a2             | 0.910 | 0.975 | 4.298  | 0.005 | 0.989 | 0.958 | 1.099 | 0.621 |
| 1368565_at   | NM_019225 | solute carrier family 1 (glial high affinity glutamate transporter), member 3                           | Slc1a3             | 0.733 | 0.110 | 0.661  | 0.091 | 2.169 | 0.116 | 1.057 | 0.400 |
| 1371130_at   | X63744    | solute carrier family 1 (glial high affinity glutamate transporter), member 3                           | Slc1a3             | 0.994 | 0.930 | 0.994  | 0.127 | 0.985 | 0.930 | 0.831 | 0.067 |
| 1370367_at   | D63772    | solute carrier family 1 (neuronal/epithelial high affinity glutamate transporter, system Xag), member 1 | Slc1a1             | 7.193 | 0.008 | 1.240  | 0.145 | 7.776 | 0.014 | 0.962 | 0.374 |
| 1387932_at   | U39555    | solute carrier family 1 (neuronal/epithelial high affinity glutamate transporter, system Xag), member 1 | Slc1a1             | 1.015 | 0.921 | 1.000  | 0.968 | 1.801 | 0.102 | 1.039 | 0.926 |
| 1368609_at   | NM_017047 | solute carrier family 10 (sodium/bile acid cotransporter family), member 1                              | Slc10a1            | 1.687 | 0.225 | 1.001  | 0.750 | 0.998 | 0.924 | 0.950 | 0.456 |
| 1367877_at   | NM_013173 | solute carrier family 11 (proton-coupled divalent metal ion transporters), member 2                     | Slc11a2            | 9.325 | 0.000 | 17.194 | 0.002 | 2.864 | 0.024 | 3.877 | 0.021 |
| 1388059_a_at | AF029757  | solute carrier family 11 (proton-coupled divalent metal ion transporters), member 2                     | Slc11a2            | 2.139 | 0.213 | 1.588  | 0.037 | 1.458 | 0.347 | 1.085 | 0.433 |
| 1371525_at   | BI277550  | solute carrier family 12 (potassium/chloride transporters), member 7                                    | Slc12a7            | 1.000 | 0.608 | 0.891  | 0.304 | 1.977 | 0.012 | 1.189 | 0.074 |
| 1393364_at   | BM385460  | solute carrier family 12 (potassium/chloride transporters), member 8                                    | Slc12a8            | 0.571 | 0.032 | 0.798  | 0.196 | 0.525 | 0.033 | 0.647 | 0.008 |
| 1381253_at   | BF398826  | Solute carrier family 12, member 2                                                                      | Slc12a2            | 1.613 | 0.532 | 1.325  | 0.130 | 0.923 | 0.419 | 1.057 | 0.772 |
| 1395748_at   | AW528866  | Solute carrier family 12, member 6                                                                      | Slc12a6            | 1.111 | 0.993 | 0.638  | 0.123 | 1.340 | 0.077 | 0.758 | 0.057 |
| 1370440_at   | AB000280  | solute carrier family 15, member 4                                                                      | Slc15a4            | 1.456 | 0.173 | 1.330  | 0.271 | 1.049 | 0.733 | 1.808 | 0.197 |
| 1370548_at   | AB047324  | solute carrier family 16 (monocarboxylic acid transporters), member 10                                  | Slc16a10           | 0.219 | 0.079 | 0.108  | 0.000 | 0.369 | 0.003 | 0.250 | 0.025 |
| 1390036_at   | BI289867  | solute carrier family 16 (monocarboxylic acid transporters), member 6                                   | Slc16a6            | 4.252 | 0.006 | 1.772  | 0.162 | 4.552 | 0.001 | 2.207 | 0.013 |
| 1394751_at   | AI577528  | Solute carrier family 16 (monocarboxylic acid transporters), member 6                                   | Slc16a6            | 1.000 | 0.481 | 1.022  | 0.590 | 0.784 | 0.297 | 0.936 | 0.634 |
| 1392879_at   | AA946069  | Solute carrier family 16 (monocarboxylic acid transporters), member 6                                   | Slc16a6            | 0.807 | 0.984 | 0.999  | 0.832 | 0.968 | 0.982 | 1.003 | 0.727 |
| 1376605_at   | AA900983  | solute carrier family 17 (anion/sugar transporter), member 5                                            | Slc17a5            | 0.815 | 0.100 | 1.666  | 0.040 | 0.659 | 0.142 | 1.429 | 0.049 |
| 1387188_at   | NM_133554 | solute carrier family 17 (sodium phosphate), member 1                                                   | Slc17a1            | 1.001 | 0.996 | 0.997  | 0.928 | 1.283 | 0.402 | 1.054 | 0.750 |
| 1390591_at   | AI169163  | solute carrier family 17 (sodium phosphate), member 3                                                   | Slc17a3            | 2.051 | 0.002 | 7.003  | 0.005 | 1.161 | 0.497 | 7.051 | 0.006 |
| 1387999_at   | M97380    | solute carrier family 18 (vesicular monoamine), member 1                                                | Slc18a1            | 1.247 | 0.510 | 1.004  | 0.980 | 1.268 | 0.374 | 0.995 | 0.975 |
| 1369131_at   | NM_013031 | solute carrier family 18 (vesicular monoamine), member 2                                                | Slc18a2            | 0.679 | 0.068 | 0.749  | 0.118 | 0.522 | 0.073 | 0.523 | 0.005 |
| 1390863_at   | BF283298  | solute carrier family 19 (thiamine transporter), member 2                                               | Slc19a2            | 1.112 | 0.601 | 3.217  | 0.000 | 0.908 | 0.583 | 2.478 | 0.006 |
| 1370848_at   | BI284218  | solute carrier family 2 (facilitated glucose transporter), member 1                                     | Slc2a1             | 4.249 | 0.009 | 12.799 | 0.005 | 2.223 | 0.143 | 9.074 | 0.006 |
| 1380112_at   | AW531114  | Solute carrier family 2 (facilitated glucose transporter), member 1                                     | Slc2a1             | 1.160 | 0.597 | 0.708  | 0.710 | 0.763 | 0.106 | 1.007 | 0.988 |
| 1387228_at   | NM_012879 | solute carrier family 2 (facilitated glucose transporter), member 2                                     | Slc2a2             | 0.373 | 0.000 | 0.266  | 0.001 | 0.381 | 0.003 | 0.373 | 0.018 |
| 1368460_at   | NM_031741 | solute carrier family 2, member 5                                                                       | Slc2a5             | 0.716 | 0.998 | 0.510  | 0.026 | 0.433 | 0.777 | 0.426 | 0.028 |
| 1370314_at   | AB000489  | solute carrier family 20 (phosphate transporter), member 1                                              | Slc20a1            | 2.250 | 0.017 | 4.990  | 0.000 | 2.643 | 0.013 | 4.115 | 0.000 |
| 1372747_at   | AI409899  | solute carrier family 20, member 2                                                                      | Slc20a2            | 0.790 | 0.795 | 1.275  | 0.059 | 0.748 | 0.572 | 1.571 | 0.115 |
| 1398435_at   | BE112977  | Solute carrier family 22 (organic cation transporter), member 15 (predicted)                            | Slc22a15_predicted | 2.424 | 0.100 | 2.117  | 0.056 | 1.407 | 0.084 | 1.738 | 0.006 |
| 1371889_at   | AW915448  | solute carrier family 22 (organic cation transporter), member 17                                        | Slc22a17           | 0.448 | 0.093 | 0.269  | 0.002 | 0.455 | 0.074 | 0.361 | 0.011 |
| 1367950_at   | NM_019269 | solute carrier family 22 (organic cation transporter), member 5                                         | Slc22a5            | 1.564 | 0.072 | 1.535  | 0.047 | 1.078 | 0.754 | 0.733 | 0.139 |
| 1369169_at   | NM_017315 | solute carrier family 23 (nucleobase transporters), member 1                                            | Slc23a1            | 0.856 | 0.664 | 1.084  | 0.946 | 0.800 | 0.579 | 1.001 | 0.641 |

|              |           |                                                                                                                  |                    |        |       |       |       |        |       |       |       |
|--------------|-----------|------------------------------------------------------------------------------------------------------------------|--------------------|--------|-------|-------|-------|--------|-------|-------|-------|
| 1386454_at   | AI639159  | solute carrier family 23 (nucleobase transporters), member 3 (predicted)                                         | Slc23a3_predicted  | 1.625  | 0.063 | 0.942 | 0.727 | 1.727  | 0.213 | 0.934 | 0.056 |
| 1398162_at   | BF400617  | Solute carrier family 24 (sodium/potassium/calcium exchanger), member 2                                          | Slc24a2            | 0.913  | 0.030 | 0.949 | 0.822 | 0.422  | 0.054 | 0.941 | 0.814 |
| 1388000_at   | AF021923  | solute carrier family 24 (sodium/potassium/calcium exchanger), member 2                                          | Slc24a2            | 0.302  | 0.051 | 0.141 | 0.015 | 0.295  | 0.040 | 0.179 | 0.005 |
| 1392459_x_at | AI136271  | Solute carrier family 24 (sodium/potassium/calcium exchanger), member 4 (predicted)                              | Slc24a4_predicted  | 1.887  | 0.424 | 0.986 | 0.324 | 1.358  | 0.418 | 1.872 | 0.082 |
| 1381965_at   | AI136271  | Solute carrier family 24 (sodium/potassium/calcium exchanger), member 4 (predicted)                              | Slc24a4_predicted  | 1.329  | 0.699 | 1.527 | 0.965 | 1.365  | 0.461 | 1.439 | 0.089 |
| 1398249_at   | NM_053965 | solute carrier family 25 (mitochondrial carnitine/acylcarnitine translocase), member 20                          | Slc25a20           | 0.763  | 0.466 | 1.273 | 0.033 | 0.780  | 0.143 | 0.899 | 0.268 |
| 1380111_at   | AI578095  | Solute carrier family 25 (mitochondrial carrier, Aralar), member 12 (predicted)                                  | Slc25a12_predicted | 1.043  | 0.359 | 0.961 | 0.986 | 0.998  | 0.454 | 1.119 | 0.829 |
| 1371534_at   | AI407908  | solute carrier family 25 (mitochondrial carrier, glutamate), member 22                                           | Slc25a22           | 1.516  | 0.141 | 2.047 | 0.004 | 1.053  | 0.634 | 1.986 | 0.004 |
| 1390483_at   | BF555120  | solute carrier family 25 (mitochondrial carrier, palmitoylcarnitine transporter), member 29                      | Slc25a29           | 1.000  | 0.545 | 1.000 | 0.976 | 1.176  | 0.329 | 1.002 | 0.992 |
| 1372538_at   | BM389148  | solute carrier family 25 (mitochondrial carrier, peroxisomal membrane protein), member 17 (predicted)            | Slc25a17_predicted | 0.483  | 0.042 | 0.783 | 0.126 | 0.369  | 0.007 | 0.636 | 0.011 |
| 1380909_at   | BM385894  | Solute carrier family 25 (mitochondrial carrier, phosphate carrier), member 24 (predicted)                       | Slc25a24_predicted | 2.091  | 0.000 | 1.303 | 0.005 | 1.968  | 0.000 | 1.277 | 0.048 |
| 1371754_at   | AI177358  | solute carrier family 25 (mitochondrial carrier, phosphate carrier), member 25                                   | Slc25a25           | 0.579  | 0.133 | 0.569 | 0.011 | 0.540  | 0.007 | 0.625 | 0.005 |
| 1373283_at   | BE113158  | Solute carrier family 25 (mitochondrial carrier; adenine nucleotide translocator), member 3                      | Slc25a3            | 0.487  | 0.082 | 2.119 | 0.016 | 0.210  | 0.003 | 1.407 | 0.034 |
| 1370277_at   | M23984    | solute carrier family 25 (mitochondrial carrier; adenine nucleotide translocator), member 3                      | Slc25a3            | 0.621  | 0.260 | 0.868 | 0.090 | 0.704  | 0.051 | 0.919 | 0.345 |
| 1396641_at   | BF397278  | Solute carrier family 25 (mitochondrial carrier; adenine nucleotide translocator), member 3                      | Slc25a3            | 0.998  | 0.984 | 0.974 | 0.713 | 1.099  | 0.333 | 1.185 | 0.757 |
| 1388112_at   | BG666999  | solute carrier family 25 (mitochondrial carrier; adenine nucleotide translocator), member 4                      | Slc25a4            | 0.858  | 0.818 | 0.965 | 0.262 | 0.449  | 0.093 | 0.679 | 0.002 |
| 1388163_at   | AI012445  | solute carrier family 25 (mitochondrial carrier; adenine nucleotide translocator), member 5                      | Slc25a5            | 0.653  | 0.804 | 0.956 | 0.098 | 0.598  | 0.546 | 0.909 | 0.226 |
| 1370020_at   | NM_133418 | solute carrier family 25 (mitochondrial carrier; dicarboxylate transporter), member 10                           | Slc25a10           | 1.140  | 0.313 | 1.006 | 0.982 | 0.934  | 0.410 | 0.969 | 0.976 |
| 1393947_at   | BG377383  | solute carrier family 25 (mitochondrial carrier; ornithine transporter) member 15                                | Slc25a15           | 0.998  | 0.181 | 0.504 | 0.007 | 1.107  | 0.155 | 0.509 | 0.007 |
| 1370060_at   | NM_022398 | solute carrier family 25 (mitochondrial carrier; oxoglutarate carrier), member 11                                | Slc25a11           | 0.510  | 0.021 | 0.647 | 0.006 | 0.540  | 0.000 | 0.700 | 0.094 |
| 1380031_at   | BE098261  | Solute carrier family 25 (mitochondrial oxodicarboxylate carrier), member 21                                     | Slc25a21           | 0.624  | 0.149 | 1.474 | 0.069 | 1.559  | 0.007 | 0.935 | 0.780 |
| 1367773_at   | NM_017307 | solute carrier family 25, member 1                                                                               | Slc25a1            | 1.227  | 0.996 | 0.573 | 0.016 | 0.906  | 0.638 | 0.681 | 0.008 |
| 1390416_at   | H35736    | Solute carrier family 25, member 30                                                                              | Slc25a30           | 1.143  | 0.424 | 2.086 | 0.015 | 0.831  | 0.365 | 1.786 | 0.044 |
| 1381472_at   | BE110276  | Solute carrier family 25, member 32 (predicted)                                                                  | Slc25a32_predicted | 1.871  | 0.219 | 1.063 | 0.304 | 2.901  | 0.136 | 0.826 | 0.920 |
| 1393513_at   | AI071445  | Solute carrier family 26 (sulfate transporter), member 2                                                         | Slc26a2            | 1.510  | 0.498 | 0.950 | 0.571 | 1.491  | 0.350 | 1.173 | 0.155 |
| 1367789_at   | NM_053580 | solute carrier family 27 (fatty acid transporter), member 1                                                      | Slc27a1            | 0.423  | 0.013 | 0.439 | 0.071 | 0.912  | 0.196 | 0.608 | 0.024 |
| 1381028_at   | BF417583  | Solute carrier family 27 (fatty acid transporter), member 4                                                      | Slc27a4            | 1.096  | 0.226 | 1.867 | 0.009 | 0.671  | 0.191 | 1.107 | 0.520 |
| 1387585_at   | NM_031738 | solute carrier family 29 (nucleoside transporters), member 2                                                     | Slc29a2            | 1.002  | 0.881 | 1.003 | 0.878 | 1.000  | 0.430 | 1.001 | 0.952 |
| 1374200_at   | BM392280  | solute carrier family 29 (nucleoside transporters), member 3                                                     | Slc29a3            | 1.250  | 0.208 | 0.708 | 0.070 | 1.337  | 0.077 | 0.994 | 0.655 |
| 1398771_at   | NM_019283 | solute carrier family 3 (activators of dibasic and neutral amino acid transport), member 2                       | Slc3a2             | 0.989  | 0.897 | 2.168 | 0.002 | 0.671  | 0.418 | 1.765 | 0.030 |
| 1368440_at   | NM_017216 | solute carrier family 3, member 1                                                                                | Slc3a1             | 0.238  | 0.022 | 0.109 | 0.006 | 0.460  | 0.046 | 0.168 | 0.009 |
| 1375182_at   | BE109671  | Solute carrier family 3, member 1                                                                                | Slc3a1             | 0.335  | 0.034 | 0.129 | 0.000 | 0.368  | 0.006 | 0.236 | 0.013 |
| 1398264_at   | NM_012890 | solute carrier family 30 (zinc transporter), member 2                                                            | Slc30a2            | 0.997  | 0.680 | 0.996 | 0.978 | 1.002  | 0.988 | 0.904 | 0.104 |
| 1370357_at   | Y16774    | solute carrier family 30 (zinc transporter), member 4                                                            | Slc30a4            | 0.482  | 0.095 | 0.737 | 0.035 | 0.427  | 0.000 | 0.783 | 0.058 |
| 1373821_at   | BF418332  | solute carrier family 30 (zinc transporter), member 5 (predicted)                                                | Slc30a5_predicted  | 0.497  | 0.384 | 0.935 | 0.207 | 0.452  | 0.052 | 0.769 | 0.033 |
| 1389133_at   | AI104870  | solute carrier family 30 (zinc transporter), member 6 (predicted)                                                | Slc30a6_predicted  | 0.767  | 0.246 | 0.713 | 0.358 | 0.755  | 0.215 | 0.788 | 0.375 |
| 1374686_at   | BF283406  | solute carrier family 30 (zinc transporter), member 7                                                            | Slc30a7            | 0.887  | 0.603 | 1.188 | 0.874 | 1.295  | 0.076 | 1.005 | 0.952 |
| 1368045_at   | NM_133600 | solute carrier family 31 (copper transporters), member 1                                                         | Slc31a1            | 0.536  | 0.082 | 1.401 | 0.002 | 0.621  | 0.041 | 1.225 | 0.006 |
| 1373657_at   | BF417391  | solute carrier family 31, member 2                                                                               | Slc31a2            | 1.092  | 0.738 | 0.314 | 0.004 | 1.258  | 0.233 | 0.392 | 0.005 |
| 1394954_at   | BE101666  | solute carrier family 31, member 2                                                                               | Slc31a2            | 1.229  | 0.914 | 0.268 | 0.005 | 0.816  | 0.478 | 0.246 | 0.023 |
| 1393216_at   | BI282044  | solute carrier family 33 (acetyl-CoA transporter), member 1                                                      | Slc33a1            | 0.716  | 0.031 | 0.648 | 0.015 | 1.020  | 0.353 | 0.845 | 0.172 |
| 1370134_at   | NM_022252 | solute carrier family 33 (acetyl-CoA transporter), member 1                                                      | Slc33a1            | 0.569  | 0.305 | 0.885 | 0.509 | 0.769  | 0.197 | 1.037 | 0.516 |
| 1392317_at   | BI288026  | Solute carrier family 33 (acetyl-CoA transporter), member 1                                                      | Slc33a1            | 0.932  | 0.417 | 1.562 | 0.502 | 1.198  | 0.190 | 1.150 | 0.586 |
| 1370745_at   | AB013454  | solute carrier family 34 (sodium phosphate), member 1                                                            | Slc34a1            | 0.960  | 0.633 | 1.331 | 0.065 | 0.857  | 0.086 | 1.308 | 0.018 |
| 1386077_at   | AA891822  | Solute carrier family 35 (CMP-sialic acid transporter), member 1 (predicted)                                     | Slc35a1_predicted  | 0.805  | 0.077 | 0.796 | 0.075 | 0.741  | 0.728 | 1.111 | 0.258 |
| 1386078_at   | AI228537  | solute carrier family 35 (CMP-sialic acid transporter), member 1 (predicted)                                     | Slc35a1_predicted  | 1.110  | 0.300 | 0.750 | 0.162 | 0.810  | 0.347 | 0.712 | 0.109 |
| 1375254_at   | BE103444  | solute carrier family 35 (CMP-sialic acid transporter), member 1 (predicted)                                     | Slc35a1_predicted  | 0.851  | 0.674 | 0.818 | 0.096 | 0.999  | 0.997 | 0.632 | 0.187 |
| 1376187_at   | AI177887  | Solute carrier family 35 (UDP-glucuronic acid/UDP-N-acetylgalactosamine dual transporter), member D1 (predicted) | Slc35d1_predicted  | 0.970  | 0.280 | 0.926 | 0.268 | 0.800  | 0.160 | 0.900 | 0.323 |
| 1370303_at   | AF406814  | solute carrier family 35, member A4                                                                              | Slc35a4            | 0.887  | 0.257 | 0.902 | 0.171 | 0.766  | 0.322 | 1.128 | 0.362 |
| 1375871_at   | BM392047  | solute carrier family 35, member B1                                                                              | Slc35b1            | 0.934  | 0.457 | 1.370 | 0.092 | 1.021  | 0.157 | 1.012 | 0.416 |
| 1377143_at   | BM388792  | solute carrier family 35, member B1                                                                              | Slc35b1            | 0.788  | 0.992 | 0.987 | 0.144 | 0.832  | 0.527 | 1.051 | 0.113 |
| 1376835_at   | BI293600  | Solute carrier family 35, member B2                                                                              | Slc35b2            | 11.207 | 0.028 | 2.045 | 0.023 | 41.266 | 0.000 | 7.889 | 0.003 |
| 1390825_at   | AI010067  | solute carrier family 35, member B3 (predicted)                                                                  | Slc35b3_predicted  | 1.243  | 0.015 | 1.111 | 0.237 | 1.613  | 0.296 | 1.227 | 0.009 |
| 1388760_at   | BI296312  | Solute carrier family 35, member B4 (predicted)                                                                  | Slc35b4_predicted  | 0.450  | 0.028 | 0.749 | 0.124 | 0.957  | 0.649 | 0.874 | 0.108 |
| 1367499_at   | BM390900  | solute carrier family 35, member C1 (predicted)                                                                  | Slc35c1_predicted  | 0.516  | 0.206 | 0.646 | 0.014 | 0.632  | 0.141 | 0.918 | 0.431 |
| 1383350_at   | AA963524  | Solute carrier family 35, member C2                                                                              | Slc35c2            | 0.774  | 0.074 | 0.896 | 0.964 | 0.884  | 0.161 | 0.998 | 0.988 |
| 1383996_at   | BI281608  | Solute carrier family 35, member E1 (predicted)                                                                  | Slc35e1_predicted  | 0.874  | 0.892 | 1.225 | 0.215 | 0.926  | 0.785 | 0.962 | 0.211 |
| 1387942_at   | AF182714  | solute carrier family 35, member E4                                                                              | Slc35e4            | 0.999  | 0.989 | 1.424 | 0.063 | 0.997  | 0.968 | 1.122 | 0.252 |
| 1388732_at   | AI009820  | solute carrier family 35, member F5 (predicted)                                                                  | Slc35f5_predicted  | 1.168  | 0.529 | 1.184 | 0.796 | 0.639  | 0.136 | 0.934 | 0.306 |
| 1398531_at   | AI058947  | Solute carrier family 36 (proton/amino acid symporter), member 4 (predicted)                                     | Slc36a4_predicted  | 0.438  | 0.003 | 0.358 | 0.001 | 0.279  | 0.103 | 0.361 | 0.031 |

|              |           |                                                                                                                                           |                    |       |       |        |       |       |       |        |       |
|--------------|-----------|-------------------------------------------------------------------------------------------------------------------------------------------|--------------------|-------|-------|--------|-------|-------|-------|--------|-------|
| 1382076_at   | AA955403  | solute carrier family 37 (glycerol-3-phosphate transporter), member 1                                                                     | Slc37a1            | 3.388 | 0.050 | 1.933  | 0.009 | 2.979 | 0.000 | 1.974  | 0.047 |
| 1386960_at   | NM_031589 | solute carrier family 37 (glycerol-6-phosphate transporter), member 4                                                                     | Slc37a4            | 0.115 | 0.009 | 0.183  | 0.000 | 0.202 | 0.000 | 0.183  | 0.009 |
| 1370409_at   | AF075704  | solute carrier family 38, member 1                                                                                                        | Slc38a1            | 0.831 | 0.897 | 4.248  | 0.016 | 0.887 | 0.896 | 3.495  | 0.001 |
| 1370286_at   | AF249673  | solute carrier family 38, member 2                                                                                                        | Slc38a2            | 0.942 | 0.547 | 0.914  | 0.120 | 0.872 | 0.093 | 1.036  | 0.557 |
| 1369074_at   | NM_130748 | solute carrier family 38, member 4                                                                                                        | Slc38a4            | 0.657 | 0.028 | 1.021  | 0.989 | 0.634 | 0.045 | 0.991  | 0.899 |
| 1387970_at   | AF276870  | solute carrier family 38, member 5                                                                                                        | Slc38a5            | 0.453 | 0.069 | 0.114  | 0.000 | 0.496 | 0.027 | 0.134  | 0.003 |
| 1376972_at   | AI407028  | Solute carrier family 39 (iron-regulated transporter), member 1                                                                           | Slc40a1            | 0.270 | 0.006 | 0.790  | 0.939 | 0.270 | 0.007 | 0.839  | 0.906 |
| 1390412_at   | AI229664  | Solute carrier family 39 (iron-regulated transporter), member 1                                                                           | Slc40a1            | 0.143 | 0.027 | 1.456  | 0.435 | 0.352 | 0.068 | 1.912  | 0.117 |
| 1393162_at   | AI502079  | solute carrier family 39 (metal ion transporter), member 6                                                                                | Slc39a6            | 1.396 | 0.202 | 1.684  | 0.003 | 1.482 | 0.880 | 1.272  | 0.312 |
| 1372482_at   | AI600216  | solute carrier family 39 (zinc transporter), member 13                                                                                    | Slc39a13           | 0.660 | 0.010 | 1.000  | 0.998 | 0.867 | 0.161 | 0.821  | 0.089 |
| 1373953_at   | BI290779  | solute carrier family 4 (anion exchanger), member 1, adaptor protein (predicted)                                                          | Slc4a1ap_predicted | 0.660 | 0.683 | 0.940  | 0.470 | 1.069 | 0.903 | 1.173  | 0.158 |
| 1368082_at   | NM_017048 | solute carrier family 4, member 2                                                                                                         | Slc4a2             | 0.938 | 0.801 | 0.889  | 0.739 | 0.627 | 0.014 | 0.885  | 0.028 |
| 1368772_at   | NM_017049 | solute carrier family 4, member 3                                                                                                         | Slc4a3             | 0.924 | 0.208 | 1.033  | 0.394 | 0.717 | 0.342 | 0.787  | 0.005 |
| 1373326_at   | AI716512  | Solute carrier family 4, sodium bicarbonate transporter-like, member 10                                                                   | Slc4a10            | 0.781 | 0.050 | 2.704  | 0.001 | 0.487 | 0.017 | 2.326  | 0.002 |
| 1383319_at   | BI293444  | solute carrier family 4, sodium bicarbonate transporter-like, member 11 (predicted)                                                       | Slc4a11_predicted  | 3.300 | 0.015 | 2.622  | 0.016 | 1.160 | 0.656 | 1.140  | 0.384 |
| 1379736_at   | AI232440  | Solute carrier family 43, member 2 (predicted)                                                                                            | Slc43a2_predicted  | 2.013 | 0.037 | 0.747  | 0.077 | 0.482 | 0.041 | 0.439  | 0.021 |
| 1384756_at   | BF394311  | Solute carrier family 43, member 2 (predicted)                                                                                            | Slc43a2_predicted  | 0.646 | 0.189 | 0.127  | 0.006 | 0.157 | 0.030 | 0.151  | 0.015 |
| 1376117_at   | BI289103  | solute carrier family 44, member 4                                                                                                        | Slc44a4            | 2.459 | 0.130 | 2.604  | 0.018 | 4.514 | 0.004 | 3.226  | 0.007 |
| 1392349_at   | BE116021  | solute carrier family 5 (inositol transporters), member 3                                                                                 | Slc5a3             | 1.116 | 0.722 | 2.788  | 0.009 | 2.117 | 0.099 | 1.448  | 0.062 |
| 1383697_at   | AW530905  | Solute carrier family 5 (inositol transporters), member 3                                                                                 | Slc5a3             | 1.072 | 0.991 | 1.919  | 0.034 | 1.639 | 0.127 | 1.517  | 0.086 |
| 1377196_at   | BI289660  | Solute carrier family 5 (sodium/glucose cotransporter), member 10 (predicted)                                                             | Slc5a10_predicted  | 1.010 | 0.988 | 0.982  | 0.788 | 1.115 | 0.734 | 0.981  | 0.991 |
| 1368414_at   | NM_022590 | solute carrier family 5 (sodium/glucose cotransporter), member 2                                                                          | Slc5a2             | 0.514 | 0.033 | 0.389  | 0.001 | 0.449 | 0.299 | 0.468  | 0.004 |
| 1367815_at   | NM_130746 | solute carrier family 5 (sodium-dependent vitamin transporter), member 6                                                                  | Slc5a6             | 0.573 | 0.171 | 1.486  | 0.142 | 0.631 | 0.365 | 1.543  | 0.043 |
| 1384303_s_at | AI712791  | solute carrier family 6 (neurotransmitter transporter), member 17                                                                         | Slc6a17            | 0.416 | 0.041 | 0.323  | 0.045 | 0.391 | 0.028 | 0.212  | 0.021 |
| 1384302_at   | AI712791  | solute carrier family 6 (neurotransmitter transporter), member 17                                                                         | Slc6a17            | 0.298 | 0.094 | 0.400  | 0.005 | 0.188 | 0.021 | 0.264  | 0.022 |
| 1367810_at   | AI412218  | solute carrier family 6 (neurotransmitter transporter, creatine), member 8                                                                | Slc6a8             | 2.192 | 0.051 | 23.339 | 0.001 | 0.461 | 0.196 | 14.009 | 0.000 |
| 1386934_at   | NM_017348 | solute carrier family 6 (neurotransmitter transporter, creatine), member 8                                                                | Slc6a8             | 1.199 | 0.938 | 1.290  | 0.122 | 0.673 | 0.210 | 1.463  | 0.019 |
| 1373787_at   | AA943735  | Solute carrier family 6 (neurotransmitter transporter, glycine), member 9                                                                 | Slc6a9             | 1.304 | 0.330 | 4.793  | 0.014 | 1.472 | 0.233 | 5.906  | 0.006 |
| 1378910_at   | BG378480  | Solute carrier family 6 (neurotransmitter transporter, taurine), member 6                                                                 | Slc6a6             | 2.719 | 0.034 | 39.573 | 0.000 | 2.135 | 0.094 | 14.032 | 0.000 |
| 1368778_at   | NM_017206 | solute carrier family 6 (neurotransmitter transporter, taurine), member 6                                                                 | Slc6a6             | 1.683 | 0.117 | 1.300  | 0.413 | 1.101 | 0.621 | 0.701  | 0.013 |
| 1368391_at   | NM_013111 | solute carrier family 7 (cationic amino acid transporter, y+ system), member 1                                                            | Slc7a1             | 1.262 | 0.065 | 1.520  | 0.005 | 1.178 | 0.149 | 1.558  | 0.007 |
| 1368392_at   | BF420160  | solute carrier family 7 (cationic amino acid transporter, y+ system), member 1                                                            | Slc7a1             | 0.916 | 0.779 | 2.475  | 0.005 | 0.962 | 0.551 | 1.525  | 0.009 |
| 1369460_at   | NM_022619 | solute carrier family 7 (cationic amino acid transporter, y+ system), member 2                                                            | Slc7a2             | 1.112 | 0.375 | 2.915  | 0.014 | 0.594 | 0.447 | 1.425  | 0.135 |
| 1382145_at   | AW531444  | solute carrier family 7 (cationic amino acid transporter, y+ system), member 4 (predicted)                                                | Slc7a4_predicted   | 0.467 | 0.056 | 0.229  | 0.004 | 0.367 | 0.012 | 0.361  | 0.040 |
| 1387280_a_at | NM_017353 | solute carrier family 7 (cationic amino acid transporter, y+ system), member 5                                                            | Slc7a5             | 0.476 | 0.104 | 0.705  | 0.017 | 0.432 | 0.039 | 0.557  | 0.006 |
| 1373629_at   | BE108272  | solute carrier family 7 (cationic amino acid transporter, y+ system), member 6 (predicted)                                                | Slc7a6_predicted   | 0.696 | 0.059 | 0.917  | 0.548 | 0.693 | 0.264 | 0.842  | 0.182 |
| 1387808_at   | AF200684  | solute carrier family 7 (cationic amino acid transporter, y+ system), member 7                                                            | Slc7a7             | 1.005 | 0.570 | 0.944  | 0.074 | 1.005 | 0.992 | 0.945  | 0.077 |
| 1387057_at   | NM_053442 | solute carrier family 7 (cationic amino acid transporter, y+ system), member 8 /// synaptic Ras GTPase activating protein 1 homolog (rat) | Slc7a8 /// Syngap1 | 0.706 | 0.087 | 0.279  | 0.001 | 0.429 | 0.017 | 0.257  | 0.006 |
| 1384831_at   | AI233155  | solute carrier family 7, (cationic amino acid transporter, y+ system) member 13                                                           | Slc7a13            | 0.592 | 0.482 | 1.207  | 0.628 | 1.253 | 0.606 | 0.651  | 0.324 |
| 1387793_at   | NM_021594 | solute carrier family 9 (sodium/hydrogen exchanger), isoform 3 regulator 1                                                                | Slc9a3r1           | 0.849 | 0.582 | 0.636  | 0.048 | 0.936 | 0.580 | 0.992  | 0.138 |
| 1380531_at   | AI102178  | solute carrier family 9 (sodium/hydrogen exchanger), isoform 9 (predicted)                                                                | Slc9a9_predicted   | 0.426 | 0.037 | 1.040  | 0.151 | 0.651 | 0.077 | 0.995  | 0.841 |
| 1390440_at   | BG380512  | solute carrier family 9 (sodium/hydrogen exchanger), member 6 (predicted)                                                                 | Slc9a6_predicted   | 0.713 | 0.288 | 0.385  | 0.000 | 0.674 | 0.012 | 0.477  | 0.004 |
| 1372899_at   | AI104683  | Solute carrier family 9 (sodium/hydrogen exchanger), member 8                                                                             | Slc9a8             | 0.933 | 0.197 | 0.615  | 0.003 | 1.252 | 0.158 | 0.650  | 0.001 |
| 1367965_at   | NM_012652 | solute carrier family 9, member 1                                                                                                         | Slc9a1             | 0.964 | 0.833 | 0.986  | 0.252 | 1.807 | 0.113 | 1.024  | 0.301 |
| 1370800_at   | AF462063  | Solute carrier family 9, member 1                                                                                                         | Slc9a1             | 0.999 | 0.995 | 1.053  | 0.645 | 1.003 | 0.765 | 0.956  | 0.924 |
| 1368606_at   | NM_030838 | solute carrier organic anion transporter family, member 1a5                                                                               | Slco1a5            | 1.217 | 0.642 | 1.150  | 0.575 | 2.471 | 0.237 | 1.991  | 0.002 |
| 1395039_at   | BI289224  | Solute carrier organic anion transporter family, member 3a1                                                                               | Slco3a1            | 1.914 | 0.006 | 1.176  | 0.031 | 0.752 | 0.113 | 0.820  | 0.212 |
| 1373734_at   | AI101171  | Solute carrier organic anion transporter family, member 3a1                                                                               | Slco3a1            | 0.506 | 0.141 | 0.380  | 0.003 | 0.801 | 0.088 | 0.306  | 0.015 |
| 1389067_at   | AI180349  | solute carrier organic anion transporter family, member 4a1                                                                               | Slco4a1            | 2.124 | 0.024 | 1.663  | 0.112 | 1.410 | 0.074 | 0.966  | 0.871 |
| 1367762_at   | NM_012659 | somatostatin                                                                                                                              | Sst                | 0.476 | 0.005 | 0.083  | 0.005 | 0.478 | 0.019 | 0.077  | 0.048 |
| 1368598_at   | NM_133522 | somatostatin receptor 3 /// hypothetical gene supported by NM_133522                                                                      | Sstr3 /// SSTR     | 2.172 | 0.043 | 1.987  | 0.039 | 0.722 | 0.929 | 1.103  | 0.845 |
| 1392523_at   | AW144637  | Son cell proliferation protein                                                                                                            | Son                | 0.871 | 0.032 | 0.678  | 0.200 | 0.991 | 0.965 | 0.791  | 0.385 |
| 1391978_at   | AW531885  | Son cell proliferation protein                                                                                                            | Son                | 1.284 | 0.187 | 0.563  | 0.032 | 1.167 | 0.534 | 0.833  | 0.589 |
| 1398989_at   | BI275248  | Son cell proliferation protein                                                                                                            | Son                | 1.072 | 0.483 | 0.627  | 0.001 | 0.941 | 0.366 | 0.730  | 0.010 |
| 1369636_at   | BI285149  | sorbitol dehydrogenase                                                                                                                    | Sord               | 0.574 | 0.096 | 0.987  | 0.884 | 0.679 | 0.232 | 0.811  | 0.835 |
| 1372728_at   | BE103745  | Sortilin 1                                                                                                                                | Sort1              | 0.523 | 0.116 | 0.128  | 0.001 | 0.609 | 0.270 | 0.205  | 0.002 |
| 1391230_at   | BF394904  | Sortilin 1                                                                                                                                | Sort1              | 1.045 | 0.609 | 1.431  | 0.993 | 0.998 | 0.917 | 1.028  | 0.868 |
| 1390710_x_at | AA850618  | sortilin-related receptor, L(DLR class) A repeats-containing (predicted)                                                                  | Sorl1_predicted    | 0.615 | 0.007 | 0.244  | 0.000 | 0.643 | 0.011 | 0.419  | 0.000 |
| 1377457_a_at | AA850618  | sortilin-related receptor, L(DLR class) A repeats-containing (predicted)                                                                  | Sorl1_predicted    | 0.353 | 0.022 | 0.253  | 0.000 | 0.530 | 0.010 | 0.417  | 0.006 |
| 1377458_at   | AA850618  | sortilin-related receptor, L(DLR class) A repeats-containing (predicted)                                                                  | Sorl1_predicted    | 0.798 | 0.064 | 0.287  | 0.001 | 0.773 | 0.120 | 0.346  | 0.000 |

|              |           |                                                                           |                                             |        |       |        |       |        |       |        |       |
|--------------|-----------|---------------------------------------------------------------------------|---------------------------------------------|--------|-------|--------|-------|--------|-------|--------|-------|
| 1393933_at   | AW144823  | sortilin-related receptor, L(DLR class) A repeats-containing (predicted)  | Sor11_predicted                             | 0.470  | 0.800 | 0.216  | 0.002 | 0.574  | 0.644 | 0.329  | 0.000 |
| 1388380_at   | BI278122  | sorting and assembly machinery component 50 homolog (S. cerevisiae)       | Samm50                                      | 0.476  | 0.030 | 0.630  | 0.017 | 0.597  | 0.065 | 0.746  | 0.012 |
| 1368043_at   | NM_053411 | sorting nexin 1                                                           | Snx1                                        | 1.460  | 0.016 | 1.913  | 0.007 | 1.412  | 0.090 | 1.823  | 0.010 |
| 1383585_s_at | AI043753  | Sorting nexin 10                                                          | Snx10                                       | 4.616  | 0.026 | 4.064  | 0.002 | 5.147  | 0.002 | 6.992  | 0.001 |
| 1383653_at   | BG374126  | sorting nexin 11                                                          | Snx11                                       | 2.449  | 0.067 | 1.397  | 0.994 | 3.578  | 0.003 | 1.156  | 0.986 |
| 1381699_at   | BF389280  | Sorting nexin 12 (predicted)                                              | Snx12_predicted                             | 2.021  | 0.150 | 0.808  | 0.333 | 1.578  | 0.739 | 0.680  | 0.146 |
| 1384410_at   | AA964404  | Sorting nexin 12 (predicted)                                              | Snx12_predicted                             | 1.286  | 0.415 | 0.527  | 0.039 | 0.935  | 0.263 | 0.651  | 0.486 |
| 1390280_at   | BF396115  | Sorting nexin 12 (predicted)                                              | Snx12_predicted                             | 0.994  | 0.966 | 0.954  | 0.123 | 1.002  | 0.607 | 0.929  | 0.197 |
| 1371555_at   | AI599411  | sorting nexin 12 (predicted) /// similar to Sorting nexin 12 (predicted)  | Snx12_predicted ///<br>RGD1559528_predicted | 0.783  | 0.448 | 1.017  | 0.989 | 0.977  | 0.497 | 0.948  | 0.355 |
| 1389647_at   | BM387990  | Sorting nexin 13 (predicted)                                              | Snx13_predicted                             | 0.917  | 0.330 | 0.652  | 0.122 | 1.037  | 0.681 | 0.755  | 0.049 |
| 1379388_at   | BI296311  | sorting nexin 13 (predicted)                                              | Snx13_predicted                             | 1.281  | 0.555 | 1.940  | 0.003 | 1.318  | 0.276 | 2.224  | 0.001 |
| 1374692_at   | BE107598  | Sorting nexin 14 (predicted)                                              | Snx14_predicted                             | 0.701  | 0.055 | 0.607  | 0.027 | 0.604  | 0.098 | 0.724  | 0.103 |
| 1372656_at   | BI282899  | sorting nexin 15                                                          | Snx15                                       | 1.963  | 0.012 | 4.904  | 0.000 | 2.009  | 0.010 | 3.601  | 0.000 |
| 1387510_at   | NM_022289 | sorting nexin 16                                                          | Snx16                                       | 1.530  | 0.126 | 2.549  | 0.021 | 1.603  | 0.046 | 2.050  | 0.017 |
| 1382643_at   | BE102993  | sorting nexin 16                                                          | Snx16                                       | 1.502  | 0.159 | 1.775  | 0.034 | 1.499  | 0.090 | 1.370  | 0.038 |
| 1373061_at   | BE329329  | sorting nexin 17                                                          | Snx17                                       | 0.448  | 0.457 | 0.624  | 0.277 | 0.401  | 0.066 | 0.769  | 0.140 |
| 1373832_at   | AI009949  | Sorting nexin 19 (predicted)                                              | Snx19_predicted                             | 0.999  | 0.986 | 0.837  | 0.155 | 0.848  | 0.037 | 0.862  | 0.292 |
| 1374401_at   | AI549249  | sorting nexin 2 (predicted)                                               | Snx2_predicted                              | 0.672  | 0.416 | 1.517  | 0.008 | 0.793  | 0.490 | 1.458  | 0.003 |
| 1386247_at   | AA859100  | sorting nexin 25                                                          | Snx25                                       | 0.910  | 0.028 | 0.972  | 0.444 | 0.879  | 0.110 | 1.040  | 0.867 |
| 1395405_at   | BE116248  | Sorting nexin 26 (predicted)                                              | Snx26_predicted                             | 0.716  | 0.541 | 0.606  | 0.066 | 0.603  | 0.967 | 0.588  | 0.013 |
| 1392704_at   | AI029221  | Sorting nexin 4 (predicted)                                               | Snx4_predicted                              | 2.258  | 0.032 | 1.692  | 0.148 | 1.565  | 0.041 | 1.158  | 0.999 |
| 1373305_at   | BI280349  | sorting nexin 4 (predicted)                                               | Snx4_predicted                              | 2.143  | 0.088 | 1.151  | 0.106 | 2.122  | 0.005 | 1.242  | 0.029 |
| 1391055_at   | AA866467  | Sorting nexin 5 (predicted)                                               | Snx5_predicted                              | 0.965  | 0.744 | 0.763  | 0.018 | 0.978  | 0.796 | 0.870  | 0.040 |
| 1371779_at   | AI408852  | sorting nexin 6 (predicted)                                               | Snx6_predicted                              | 1.742  | 0.191 | 1.826  | 0.177 | 1.235  | 0.361 | 1.428  | 0.060 |
| 1383944_at   | AI144970  | Sorting nexin 6 (predicted)                                               | Snx6_predicted                              | 1.581  | 0.662 | 1.181  | 0.643 | 1.687  | 0.023 | 0.862  | 0.043 |
| 1383742_at   | AA997003  | sorting nexin 7                                                           | Snx7                                        | 0.998  | 0.994 | 12.558 | 0.005 | 1.658  | 0.080 | 14.921 | 0.002 |
| 1379804_at   | AA900057  | sorting nexin family member 27                                            | Snx27                                       | 0.823  | 0.100 | 0.756  | 0.880 | 0.573  | 0.055 | 0.892  | 0.435 |
| 1372203_at   | AI101286  | sorting nexin family member 27                                            | Snx27                                       | 0.788  | 0.118 | 0.796  | 0.091 | 1.054  | 0.926 | 0.705  | 0.085 |
| 1395216_at   | AI176768  | Sorting nexin family member 27                                            | Snx27                                       | 0.636  | 0.590 | 1.000  | 0.039 | 0.849  | 0.699 | 1.329  | 0.090 |
| 1377603_at   | BF284123  | sorting nexin 24                                                          | Snx24                                       | 2.542  | 0.147 | 1.140  | 0.308 | 2.118  | 0.002 | 1.792  | 0.095 |
| 1381625_at   | AI146135  | Sorting nexin 24                                                          | Snx24                                       | 1.435  | 0.293 | 1.223  | 0.796 | 3.165  | 0.001 | 1.129  | 0.762 |
| 1382419_at   | BI276776  | SoxLZ/Sox6 leucine zipper binding protein in testis (predicted)           | Solt_predicted                              | 0.275  | 0.124 | 0.435  | 0.806 | 0.479  | 0.134 | 0.235  | 0.096 |
| 1392631_at   | AA900254  | Sp1 transcription factor                                                  | Sp1                                         | 1.674  | 0.145 | 2.712  | 0.126 | 0.945  | 0.964 | 2.049  | 0.179 |
| 1392180_at   | AI705174  | Sp1 transcription factor                                                  | Sp1                                         | 1.475  | 0.159 | 2.803  | 0.013 | 2.186  | 0.312 | 2.236  | 0.098 |
| 1371880_at   | AI179662  | Sp1 transcription factor                                                  | Sp1                                         | 1.631  | 0.279 | 2.609  | 0.006 | 1.327  | 0.193 | 2.087  | 0.007 |
| 1379384_at   | BF288328  | Sp1 transcription factor                                                  | Sp1                                         | 0.964  | 0.354 | 1.001  | 0.973 | 0.932  | 0.151 | 1.002  | 0.970 |
| 1372930_at   | AI411381  | SP110 nuclear body protein                                                | Sp110                                       | 10.738 | 0.000 | 2.537  | 0.002 | 13.192 | 0.000 | 3.132  | 0.001 |
| 1394819_at   | AI177957  | SP110 nuclear body protein                                                | Sp110                                       | 14.520 | 0.001 | 4.784  | 0.007 | 20.472 | 0.002 | 6.431  | 0.006 |
| 1396268_at   | BF523991  | SP110 nuclear body protein                                                | Sp110                                       | 15.427 | 0.038 | 3.378  | 0.012 | 11.760 | 0.006 | 3.743  | 0.026 |
| 1374838_at   | BI293504  | SP140 nuclear body protein                                                | Sp140                                       | 13.225 | 0.000 | 4.693  | 0.001 | 15.220 | 0.000 | 5.180  | 0.014 |
| 1382548_at   | AI011760  | Sp2 transcription factor (mapped)                                         | Sp2_mapped                                  | 0.826  | 0.235 | 0.877  | 0.586 | 0.684  | 0.215 | 0.733  | 0.247 |
| 1393471_at   | AI175908  | Sp3 transcription factor                                                  | Sp3                                         | 1.113  | 0.494 | 3.119  | 0.046 | 1.168  | 0.257 | 1.159  | 0.648 |
| 1397734_at   | AW524780  | Sp3 transcription factor                                                  | Sp3                                         | 0.875  | 0.643 | 0.753  | 0.400 | 0.710  | 0.520 | 1.006  | 0.987 |
| 1373636_at   | AI406342  | sparc/osteonectin, cwcv and kazal-like domains proteoglycan 1             | Spock1                                      | 0.676  | 0.681 | 0.388  | 0.056 | 0.433  | 0.108 | 0.297  | 0.010 |
| 1383140_at   | BG665046  | sparc/osteonectin, cwcv and kazal-like domains proteoglycan 2 (predicted) | Spock2_predicted                            | 1.003  | 0.510 | 0.735  | 0.048 | 0.985  | 0.959 | 0.452  | 0.005 |
| 1383839_at   | AI576427  | spastic paraplegia 20, spartin (Troyer syndrome) homolog (human)          | Spg20                                       | 0.413  | 0.020 | 0.412  | 0.013 | 0.255  | 0.003 | 0.492  | 0.009 |
| 1388565_at   | BI289536  | spastic paraplegia 21 homolog (human)                                     | Spg21                                       | 1.646  | 0.067 | 3.120  | 0.000 | 2.196  | 0.008 | 3.604  | 0.007 |
| 1374839_at   | BE329255  | spastic paraplegia 7 homolog (human)                                      | Spg7                                        | 0.808  | 0.101 | 0.898  | 0.364 | 0.655  | 0.147 | 0.906  | 0.475 |
| 1395985_at   | AI175636  | spastic paraplegia 7 homolog (human)                                      | Spg7                                        | 0.989  | 0.965 | 1.068  | 0.983 | 1.187  | 0.483 | 1.066  | 0.987 |
| 1383782_at   | AI144975  | spastin (predicted)                                                       | Spast_predicted                             | 0.511  | 0.167 | 1.371  | 0.197 | 0.812  | 0.735 | 1.262  | 0.305 |
| 1378629_at   | AI227638  | special AT-rich sequence binding protein 1                                | Satb1                                       | 0.543  | 0.021 | 0.233  | 0.012 | 0.446  | 0.039 | 0.283  | 0.012 |
| 1379626_at   | AA946353  | Special AT-rich sequence binding protein 1                                | Satb1                                       | 0.851  | 0.056 | 0.232  | 0.001 | 0.965  | 0.414 | 0.364  | 0.003 |
| 1398367_at   | BF283504  | speckle-type POZ protein                                                  | Spop                                        | 1.826  | 0.011 | 1.248  | 0.002 | 1.578  | 0.033 | 1.253  | 0.055 |
| 1378604_at   | BF396495  | Speckle-type POZ protein                                                  | Spop                                        | 1.607  | 0.827 | 0.772  | 0.880 | 0.800  | 0.480 | 0.882  | 0.143 |
| 1390706_at   | BF392456  | spectrin beta 2                                                           | Spnb2                                       | 1.030  | 0.637 | 1.200  | 0.512 | 1.066  | 0.976 | 1.410  | 0.768 |
| 1371419_at   | AW918614  | spectrin beta 2                                                           | Spnb2                                       | 1.077  | 0.647 | 1.033  | 0.933 | 0.851  | 0.431 | 0.944  | 0.356 |
| 1395359_at   | BF559566  | Spectrin beta 2                                                           | Spnb2                                       | 1.021  | 0.805 | 1.796  | 0.007 | 0.923  | 0.366 | 1.856  | 0.029 |
| 1394926_at   | AW527214  | Spectrin beta 3                                                           | Spnb3                                       | 1.008  | 0.844 | 0.979  | 0.616 | 1.001  | 0.965 | 0.970  | 0.880 |
| 1386596_at   | BF563673  | Speedy homolog 1 (Drosophila)                                             | Spdy1                                       | 1.193  | 0.137 | 2.347  | 0.182 | 1.466  | 0.162 | 2.033  | 0.021 |
| 1369469_s_at | NM_138855 | speedy homolog 1 (Drosophila)                                             | Spdy1                                       | 1.054  | 0.304 | 1.099  | 0.058 | 1.280  | 0.055 | 0.840  | 0.620 |

|              |           |                                                                                          |                                            |       |       |        |       |       |       |        |       |
|--------------|-----------|------------------------------------------------------------------------------------------|--------------------------------------------|-------|-------|--------|-------|-------|-------|--------|-------|
| 1386597_s_at | BF563673  | speedy homolog 1 (Drosophila)                                                            | Spdy1                                      | 1.072 | 0.811 | 0.833  | 0.330 | 1.233 | 0.145 | 1.178  | 0.106 |
| 1389400_at   | AW531716  | SPEN homolog, transcriptional regulator (Drosophila) (predicted)                         | Spn_predicted                              | 1.353 | 0.152 | 1.471  | 0.001 | 1.043 | 0.727 | 1.751  | 0.065 |
| 1387326_at   | NM_053967 | sperm adhesion molecule                                                                  | Spam                                       | 1.045 | 0.158 | 1.139  | 0.993 | 1.044 | 0.812 | 1.136  | 0.993 |
| 1379028_at   | BE118950  | sperm associated antigen 7 (predicted)                                                   | Spag7_predicted                            | 1.154 | 0.823 | 0.843  | 0.927 | 0.820 | 0.334 | 1.000  | 0.650 |
| 1394436_at   | BF560163  | sperm associated antigen 9 (predicted)                                                   | Spag9_predicted                            | 0.895 | 0.064 | 0.721  | 0.102 | 1.415 | 0.404 | 0.784  | 0.370 |
| 1368903_at   | NM_053416 | spermatid perinuclear RNA binding protein                                                | Strbp                                      | 0.731 | 0.322 | 1.474  | 0.007 | 0.845 | 0.035 | 1.298  | 0.007 |
| 1393724_at   | BE113911  | spermatogenesis associated 1                                                             | LOC362056                                  | 1.454 | 0.109 | 0.994  | 0.991 | 0.987 | 0.938 | 0.996  | 0.241 |
| 1375047_at   | BI295760  | spermatogenesis associated 5 (predicted)                                                 | Spata5_predicted                           | 1.164 | 0.212 | 3.068  | 0.007 | 1.786 | 0.021 | 1.915  | 0.021 |
| 1377319_at   | BF404163  | Spermatogenesis associated 5 (predicted)                                                 | Spata5_predicted                           | 1.010 | 0.952 | 1.427  | 0.216 | 1.407 | 0.449 | 1.029  | 0.897 |
| 1370398_at   | AF094609  | spermatogenesis associated 7                                                             | Spata7                                     | 0.513 | 0.147 | 1.060  | 0.786 | 0.589 | 0.128 | 1.148  | 0.938 |
| 1379018_at   | BG375236  | Spermatogenesis associated 7                                                             | Spata7                                     | 0.870 | 0.842 | 1.153  | 0.899 | 1.062 | 0.809 | 0.813  | 0.670 |
| 1391885_at   | AA925352  | Spermatogenesis associated 9 (predicted)                                                 | Spata9_predicted                           | 0.450 | 0.043 | 0.154  | 0.009 | 0.624 | 0.128 | 0.357  | 0.015 |
| 1391839_at   | AA891521  | Spermatogenesis associated 9 (predicted)                                                 | Spata9_predicted                           | 0.995 | 0.855 | 0.332  | 0.001 | 0.799 | 0.934 | 0.376  | 0.042 |
| 1390244_at   | BF418231  | spermatogenesis associated, serine-rich 2 (predicted)                                    | Spats2_predicted                           | 1.314 | 0.403 | 1.365  | 0.806 | 1.503 | 0.302 | 1.176  | 0.921 |
| 1369915_at   | NM_139186 | spermatogenesis-related protein (Srp)                                                    | Mki67ip                                    | 0.508 | 0.005 | 1.213  | 0.455 | 0.490 | 0.004 | 1.162  | 0.082 |
| 1395595_at   | BG667615  | Spermatogenesis-related protein (Srp)                                                    | Mki67ip                                    | 0.536 | 0.125 | 1.173  | 0.707 | 0.529 | 0.121 | 0.911  | 0.108 |
| 1388990_at   | AA924622  | Spermatogenesis-related protein (Srp)                                                    | Mki67ip                                    | 0.469 | 0.155 | 1.599  | 0.006 | 0.567 | 0.009 | 1.542  | 0.004 |
| 1367834_at   | NM_053464 | spermidine synthase                                                                      | Srm                                        | 0.489 | 0.043 | 1.585  | 0.026 | 0.326 | 0.007 | 1.394  | 0.101 |
| 1371774_at   | AA893220  | spermidine/spermine N1-acetyl transferase (mapped)                                       | Sat_mapped                                 | 2.230 | 0.006 | 11.183 | 0.000 | 1.571 | 0.130 | 8.696  | 0.000 |
| 1374892_at   | AI410221  | spermidine/spermine N1-acetyl transferase 2 (predicted)                                  | Sat2_predicted                             | 0.936 | 0.996 | 1.177  | 0.330 | 0.498 | 0.046 | 0.859  | 0.655 |
| 1374556_at   | BI289700  | spermine oxidase (predicted)                                                             | Smox_predicted                             | 2.439 | 0.043 | 3.168  | 0.018 | 2.022 | 0.965 | 1.176  | 0.430 |
| 1394621_at   | BI292153  | spermine oxidase (predicted) /// similar to polyamine oxidase isoform 2 (predicted)      | Smox_predicted ///<br>RGD1564480_predicted | 1.350 | 0.132 | 7.768  | 0.011 | 0.991 | 0.461 | 1.199  | 0.120 |
| 1375889_at   | AI228536  | spermine synthase                                                                        | Sms                                        | 0.702 | 0.013 | 0.569  | 0.003 | 0.577 | 0.006 | 0.506  | 0.010 |
| 1394243_at   | AI101062  | spermine synthase                                                                        | Sms                                        | 0.958 | 0.757 | 0.420  | 0.017 | 1.013 | 0.932 | 0.518  | 0.030 |
| 1371580_at   | AI102725  | SPFH domain family, member 1 (predicted)                                                 | Spfh1_predicted                            | 0.848 | 0.691 | 2.019  | 0.001 | 0.667 | 0.001 | 1.863  | 0.008 |
| 1374209_at   | AI010575  | SPFH domain family, member 2 (predicted)                                                 | Spfh2_predicted                            | 1.066 | 0.920 | 0.851  | 0.290 | 1.742 | 0.012 | 1.607  | 0.036 |
| 1372437_at   | BM390921  | S-phase kinase-associated protein 1A                                                     | Skp1a                                      | 0.614 | 0.408 | 0.515  | 0.009 | 0.665 | 0.096 | 0.522  | 0.003 |
| 1388552_at   | BI283738  | sphingomyelin phosphodiesterase 1, acid lysosomal                                        | Smpd1                                      | 0.866 | 0.542 | 0.995  | 0.938 | 0.874 | 0.048 | 0.599  | 0.001 |
| 1368991_at   | NM_053605 | sphingomyelin phosphodiesterase 3, neutral                                               | Smpd3                                      | 1.759 | 0.309 | 0.720  | 0.197 | 0.999 | 0.631 | 0.465  | 0.020 |
| 1388809_at   | BM389498  | sphingomyelin phosphodiesterase, acid-like 3A                                            | Smpdl3a                                    | 1.091 | 0.493 | 1.136  | 0.410 | 0.427 | 0.017 | 1.385  | 0.196 |
| 1373542_at   | BM386306  | sphingosine kinase 2                                                                     | Sphk2                                      | 1.634 | 0.599 | 1.363  | 0.979 | 1.003 | 0.905 | 1.055  | 0.770 |
| 1373874_at   | AI169638  | sphingosine-1-phosphate phosphatase 1                                                    | Sgpp1                                      | 0.356 | 0.305 | 0.650  | 0.004 | 0.755 | 0.068 | 0.734  | 0.072 |
| 1378047_at   | AA901337  | Spi-C transcription factor (Spi-1/PU.1 related) (predicted)                              | Spic_predicted                             | 0.956 | 0.872 | 0.950  | 0.582 | 1.531 | 0.139 | 1.008  | 0.429 |
| 1376195_at   | BI288682  | spindlin                                                                                 | Spin                                       | 3.406 | 0.028 | 14.597 | 0.001 | 3.162 | 0.049 | 10.588 | 0.003 |
| 1399097_at   | AI236783  | Spindlin                                                                                 | Spin                                       | 1.894 | 0.036 | 1.635  | 0.000 | 1.737 | 0.024 | 1.486  | 0.049 |
| 1398601_at   | AW143872  | spire homolog 1 (Drosophila) (predicted)                                                 | Spire1_predicted                           | 2.315 | 0.000 | 1.423  | 0.109 | 1.778 | 0.049 | 1.240  | 0.918 |
| 1380002_at   | H31747    | spire homolog 1 (Drosophila) (predicted)                                                 | Spire1_predicted                           | 2.837 | 0.069 | 1.289  | 0.071 | 2.261 | 0.048 | 1.331  | 0.358 |
| 1396081_at   | BM387505  | spire homolog 1 (Drosophila) (predicted)                                                 | Spire1_predicted                           | 1.412 | 0.072 | 1.312  | 0.178 | 1.269 | 0.404 | 0.998  | 0.981 |
| 1373742_at   | AW526082  | splA/ryanodine receptor domain and SOCS box containing 2                                 | Spsb2                                      | 1.088 | 0.617 | 1.514  | 0.528 | 0.990 | 0.039 | 1.071  | 0.688 |
| 1377303_at   | BG373000  | SplA/ryanodine receptor domain and SOCS box containing 3 (predicted)                     | Spsb3_predicted                            | 1.623 | 0.227 | 0.596  | 0.003 | 1.834 | 0.117 | 0.828  | 0.027 |
| 1372908_at   | BM384449  | splA/ryanodine receptor domain and SOCS box containing 3 (predicted)                     | Spsb3_predicted                            | 0.591 | 0.476 | 1.078  | 0.737 | 0.738 | 0.202 | 1.090  | 0.280 |
| 1396863_at   | AW535061  | SplA/ryanodine receptor domain and SOCS box containing 4 (predicted)                     | Spsb4_predicted                            | 0.962 | 0.903 | 1.599  | 0.559 | 1.223 | 0.143 | 0.997  | 0.570 |
| 1368186_a_at | U21683    | spleen tyrosine kinase                                                                   | Syk                                        | 1.000 | 0.852 | 1.000  | 0.997 | 0.999 | 0.850 | 0.999  | 0.993 |
| 1374668_at   | AI230180  | splicing factor 3a, subunit 1 (predicted)                                                | Sf3a1_predicted                            | 0.997 | 0.988 | 1.683  | 0.148 | 0.968 | 0.705 | 1.235  | 0.033 |
| 1383591_at   | BM391839  | splicing factor 3a, subunit 2, 66kDa                                                     | Sf3a2                                      | 1.491 | 0.437 | 0.978  | 0.789 | 1.518 | 0.317 | 1.057  | 0.866 |
| 1388669_at   | BM391739  | splicing factor 3a, subunit 3                                                            | Sf3a3                                      | 1.032 | 0.116 | 0.997  | 0.692 | 0.909 | 0.491 | 1.000  | 0.036 |
| 1373887_at   | BF523561  | splicing factor 3b, subunit 1                                                            | Sf3b1                                      | 1.218 | 0.070 | 0.717  | 0.024 | 1.740 | 0.030 | 0.719  | 0.004 |
| 1389840_at   | BM384277  | splicing factor 3b, subunit 1                                                            | Sf3b1                                      | 1.089 | 0.259 | 1.389  | 0.063 | 1.416 | 0.218 | 0.768  | 0.300 |
| 1390234_at   | BE115465  | splicing factor 3b, subunit 1                                                            | Sf3b1                                      | 1.066 | 0.419 | 1.408  | 0.035 | 1.250 | 0.203 | 1.639  | 0.108 |
| 1388614_at   | BM386768  | splicing factor 3b, subunit 2 (predicted)                                                | Sf3b2_predicted                            | 0.722 | 0.095 | 1.108  | 0.184 | 0.627 | 0.027 | 0.941  | 0.514 |
| 1377070_at   | BE098910  | splicing factor 3b, subunit 2 (predicted)                                                | Sf3b2_predicted                            | 0.672 | 0.691 | 1.508  | 0.063 | 0.800 | 0.216 | 1.088  | 0.093 |
| 1372501_at   | BI285007  | splicing factor 3b, subunit 3 (predicted)                                                | Sf3b3_predicted                            | 0.852 | 0.644 | 1.062  | 0.951 | 0.997 | 0.952 | 0.926  | 0.543 |
| 1374834_at   | AA943520  | splicing factor 3b, subunit 4                                                            | Sf3b4                                      | 0.992 | 0.967 | 1.975  | 0.003 | 0.953 | 0.708 | 1.254  | 0.022 |
| 1376164_at   | BM383641  | splicing factor 4                                                                        | Sf4                                        | 0.689 | 0.024 | 1.033  | 0.613 | 0.699 | 0.115 | 0.955  | 0.885 |
| 1388132_at   | BE107056  | splicing factor proline/glutamine rich (polypyrimidine tract binding protein associated) | Sfpq                                       | 0.575 | 0.050 | 0.962  | 0.429 | 0.631 | 0.061 | 0.841  | 0.391 |
| 1383859_at   | AA963376  | Splicing factor proline/glutamine rich (polypyrimidine tract binding protein associated) | Sfpq                                       | 1.366 | 0.320 | 0.427  | 0.085 | 0.774 | 0.400 | 0.485  | 0.003 |
| 1368063_a_at | NM_133423 | splicing factor YT521-B                                                                  | Yt521                                      | 1.339 | 0.093 | 1.533  | 0.001 | 1.124 | 0.122 | 1.457  | 0.002 |
| 1374442_at   | AI227831  | splicing factor, arginine/serine rich 9                                                  | Sfrs9                                      | 0.660 | 0.005 | 1.181  | 0.555 | 0.612 | 0.011 | 0.974  | 0.875 |
| 1370189_at   | BI290979  | splicing factor, arginine/serine-rich 10 (transformer 2 homolog, Drosophila)             | Sfrs10                                     | 0.994 | 0.891 | 0.892  | 0.071 | 1.033 | 0.798 | 0.969  | 0.338 |
| 1370188_at   | AW252670  | splicing factor, arginine/serine-rich 10 (transformer 2 homolog, Drosophila)             | Sfrs10                                     | 1.020 | 0.952 | 2.182  | 0.006 | 1.044 | 0.693 | 1.409  | 0.087 |

|              |           |                                                                                           |                  |       |       |       |       |       |       |       |       |
|--------------|-----------|-------------------------------------------------------------------------------------------|------------------|-------|-------|-------|-------|-------|-------|-------|-------|
| 1387824_at   | NM_020092 | splicing factor, arginine/serine-rich 12                                                  | Sfrs12           | 1.213 | 0.159 | 4.743 | 0.015 | 1.516 | 0.097 | 1.563 | 0.040 |
| 1377521_at   | BF415552  | Splicing factor, arginine/serine-rich 14 (predicted)                                      | Sfrs14_predicted | 0.857 | 0.270 | 0.726 | 0.518 | 0.699 | 0.471 | 0.712 | 0.600 |
| 1379685_at   | AI502753  | splicing factor, arginine/serine-rich 15                                                  | Sfrs15           | 1.123 | 0.431 | 1.335 | 0.189 | 1.523 | 0.274 | 0.952 | 0.716 |
| 1379010_at   | AA956727  | Splicing factor, arginine/serine-rich 3 (SRp20) (predicted)                               | Sfrs3_predicted  | 2.108 | 0.052 | 3.978 | 0.003 | 1.181 | 0.203 | 2.046 | 0.012 |
| 1374063_at   | AI579288  | splicing factor, arginine/serine-rich 3 (SRp20) (predicted)                               | Sfrs3_predicted  | 1.084 | 0.075 | 1.251 | 0.037 | 0.991 | 0.995 | 1.040 | 0.485 |
| 1376252_at   | AI145784  | splicing factor, arginine/serine-rich 3 (SRp20) (predicted)                               | Sfrs3_predicted  | 1.031 | 0.415 | 0.385 | 0.002 | 0.760 | 0.131 | 0.501 | 0.042 |
| 1368992_a_at | AI104005  | splicing factor, arginine/serine-rich 5                                                   | Sfrs5            | 0.561 | 0.016 | 0.530 | 0.006 | 0.767 | 0.099 | 0.569 | 0.022 |
| 1380875_at   | BE106717  | Splicing factor, arginine/serine-rich 8 (suppressor-of-white-apricot homolog, Drosophila) | Sfrs8            | 0.763 | 0.033 | 1.014 | 0.603 | 0.614 | 0.237 | 1.012 | 0.884 |
| 1383676_at   | AA996595  | splicing factor, arginine/serine-rich 8 (suppressor-of-white-apricot homolog, Drosophila) | Sfrs8            | 1.020 | 0.498 | 1.084 | 0.058 | 1.000 | 0.247 | 1.130 | 0.156 |
| 1390919_at   | AI230176  | Splicing factor, arginine/serine-rich 8 (suppressor-of-white-apricot homolog, Drosophila) | Sfrs8            | 1.052 | 0.885 | 1.341 | 0.142 | 1.294 | 0.070 | 1.346 | 0.330 |
| 1391858_at   | BM385930  | splicing factor, arginine/serine-rich 8 (suppressor-of-white-apricot homolog, Drosophila) | Sfrs8            | 0.791 | 0.970 | 0.776 | 0.959 | 1.046 | 0.927 | 0.671 | 0.863 |
| 1370312_at   | M88469    | spondin 1                                                                                 | Spon1            | 1.376 | 0.177 | 0.993 | 0.975 | 1.311 | 0.072 | 1.014 | 0.946 |
| 1370847_at   | AA801238  | spondin 2, extracellular matrix protein                                                   | Spon2            | 1.209 | 0.204 | 1.106 | 0.505 | 1.805 | 0.079 | 0.904 | 0.495 |
| 1372954_at   | BF404393  | Sprague-Dawley UV73 mRNA, partial sequence                                                | ---              | 0.829 | 0.750 | 1.488 | 0.003 | 0.948 | 0.879 | 1.441 | 0.014 |
| 1374864_at   | BM390457  | sprouty homolog 2 (Drosophila)                                                            | Spry2            | 0.773 | 0.264 | 2.825 | 0.010 | 0.738 | 0.197 | 2.724 | 0.011 |
| 1392024_at   | BF419641  | Sprouty protein with EVH-1 domain 1, related sequence                                     | Spred1           | 1.568 | 0.359 | 0.877 | 0.070 | 3.776 | 0.027 | 0.575 | 0.022 |
| 1392788_at   | AA944323  | Sprouty protein with EVH-1 domain 1, related sequence                                     | Spred1           | 1.007 | 0.910 | 0.999 | 0.996 | 1.069 | 0.214 | 0.798 | 0.460 |
| 1377743_at   | BI292687  | Sprouty protein with EVH-1 domain 1, related sequence                                     | Spred1           | 1.140 | 0.986 | 1.012 | 0.336 | 1.141 | 0.995 | 1.439 | 0.235 |
| 1389008_at   | AI409218  | Sprouty-related, EVH1 domain containing 2                                                 | Spred2           | 1.157 | 0.582 | 0.362 | 0.013 | 1.725 | 0.784 | 0.411 | 0.014 |
| 1387017_at   | NM_017136 | squalene epoxidase                                                                        | Sqle             | 0.665 | 0.332 | 0.683 | 0.009 | 0.279 | 0.063 | 0.665 | 0.004 |
| 1384967_at   | BM386930  | Squamous cell carcinoma antigen recognized by T cells 2 (predicted)                       | Sart2_predicted  | 1.167 | 0.745 | 0.951 | 0.217 | 0.890 | 0.673 | 0.853 | 0.315 |
| 1387012_at   | NM_031596 | squamous cell carcinoma antigen recognized by T-cells 1                                   | Sart1            | 1.029 | 0.776 | 2.234 | 0.004 | 1.174 | 0.812 | 1.767 | 0.001 |
| 1373003_at   | BF414266  | Squamous cell carcinoma antigen recognized by T-cells 3 (predicted)                       | Sart3_predicted  | 0.707 | 0.228 | 1.415 | 0.001 | 0.761 | 0.227 | 1.776 | 0.001 |
| 1376690_at   | BI296277  | SRB7 (suppressor of RNA polymerase B) homolog (S. cerevisiae) (predicted)                 | Surb7_predicted  | 0.912 | 0.821 | 0.942 | 0.098 | 1.005 | 0.980 | 1.114 | 0.315 |
| 1369979_at   | NM_130413 | src family associated phosphoprotein 2                                                    | Scap2            | 1.317 | 0.481 | 1.112 | 0.862 | 1.531 | 0.060 | 1.163 | 0.488 |
| 1396910_at   | AW535180  | Src homology 2 domain-containing transforming protein C1                                  | Shc1             | 1.597 | 0.073 | 1.962 | 0.049 | 1.410 | 0.164 | 1.333 | 0.278 |
| 1377594_at   | BF548525  | Src homology 2 domain-containing transforming protein C1                                  | Shc1             | 1.052 | 0.399 | 1.049 | 0.586 | 0.908 | 0.554 | 1.028 | 0.654 |
| 1389567_at   | BE329208  | SREBP cleavage activating protein (predicted)                                             | Scap_predicted   | 0.872 | 0.028 | 1.454 | 0.015 | 0.772 | 0.055 | 1.330 | 0.007 |
| 1387275_at   | NM_053349 | SRY-box containing gene 11                                                                | Sox11            | 5.294 | 0.000 | 3.117 | 0.061 | 5.288 | 0.041 | 3.777 | 0.003 |
| 1383137_at   | AA956294  | SRY-box containing gene 4 (predicted)                                                     | Sox4_predicted   | 0.975 | 0.992 | 0.828 | 0.583 | 0.717 | 0.252 | 0.907 | 0.550 |
| 1373860_at   | BI297183  | SRY-box containing gene 4 (predicted)                                                     | Sox4_predicted   | 0.997 | 1.000 | 1.426 | 0.977 | 0.999 | 0.998 | 1.435 | 0.992 |
| 1392783_at   | AI136436  | Ssu72 RNA polymerase II CTD phosphatase homolog (yeast)                                   | Ssu72            | 0.635 | 0.044 | 0.567 | 0.023 | 0.879 | 0.241 | 0.688 | 0.051 |
| 1398517_at   | BI295779  | Ssu72 RNA polymerase II CTD phosphatase homolog (yeast)                                   | Ssu72            | 0.648 | 0.084 | 0.623 | 0.020 | 0.903 | 0.480 | 0.809 | 0.071 |
| 1371768_at   | BM391850  | Ssu72 RNA polymerase II CTD phosphatase homolog (yeast)                                   | Ssu72            | 1.287 | 0.470 | 1.143 | 0.634 | 1.610 | 0.133 | 1.095 | 0.990 |
| 1379078_at   | BE105838  | ST3 beta-galactoside alpha-2,3-sialyltransferase 2                                        | St3gal2          | 1.538 | 0.195 | 0.498 | 0.085 | 0.722 | 0.105 | 0.931 | 0.502 |
| 1373607_at   | BF418530  | ST3 beta-galactoside alpha-2,3-sialyltransferase 3                                        | St3gal3          | 0.814 | 0.303 | 0.672 | 0.033 | 1.024 | 0.742 | 0.650 | 0.012 |
| 1373224_at   | BI295550  | ST3 beta-galactoside alpha-2,3-sialyltransferase 4                                        | St3gal4          | 0.976 | 0.943 | 0.587 | 0.004 | 0.757 | 0.261 | 0.593 | 0.036 |
| 1368109_at   | NM_031337 | ST3 beta-galactoside alpha-2,3-sialyltransferase 5                                        | St3gal5          | 1.362 | 0.317 | 2.081 | 0.028 | 1.112 | 0.178 | 0.652 | 0.677 |
| 1383309_at   | BF522030  | ST3 beta-galactoside alpha-2,3-sialyltransferase 6                                        | St3gal6          | 2.053 | 0.221 | 1.249 | 0.256 | 2.159 | 0.142 | 0.777 | 0.458 |
| 1395389_at   | BG663624  | ST3 beta-galactoside alpha-2,3-sialyltransferase 6                                        | St3gal6          | 0.967 | 0.695 | 1.025 | 0.773 | 0.947 | 0.434 | 0.972 | 0.042 |
| 1387435_at   | NM_013029 | ST8 alpha-N-acetyl-neuraminide alpha-2,8-sialyltransferase 3                              | St8sia3          | 0.912 | 0.690 | 0.304 | 0.003 | 0.747 | 0.271 | 0.402 | 0.002 |
| 1370476_at   | AY083159  | Stam binding protein                                                                      | Stamp            | 0.939 | 0.454 | 1.037 | 0.388 | 0.914 | 0.848 | 0.932 | 0.558 |
| 1370898_at   | BF288101  | stannin                                                                                   | Snn              | 1.002 | 0.985 | 1.024 | 0.840 | 1.002 | 0.988 | 1.001 | 0.878 |
| 1393559_at   | AI235210  | Stanniocalcin 1                                                                           | Stc1             | 0.613 | 0.230 | 1.289 | 0.210 | 0.515 | 0.177 | 0.833 | 0.845 |
| 1377404_at   | BM386683  | stanniocalcin 1                                                                           | Stc1             | 1.001 | 0.933 | 1.229 | 0.059 | 0.999 | 1.000 | 1.282 | 0.748 |
| 1367790_at   | NM_022694 | staphylococcal nuclease domain containing 1                                               | Snd1             | 0.833 | 0.088 | 1.010 | 0.243 | 0.861 | 0.169 | 1.065 | 0.073 |
| 1374815_at   | AA997695  | STARD3 N-terminal like                                                                    | Stard3nl         | 1.048 | 0.845 | 1.461 | 0.025 | 1.492 | 0.026 | 1.556 | 0.007 |
| 1392708_at   | AI175745  | STAR-related lipid transfer (START) domain containing protein 6                           | Stard6           | 0.689 | 0.414 | 0.922 | 0.514 | 0.706 | 0.415 | 0.646 | 0.766 |
| 1388948_at   | AI104759  | START domain containing 10                                                                | Stard10          | 0.733 | 0.415 | 0.877 | 0.513 | 0.582 | 0.031 | 0.728 | 0.759 |
| 1388562_at   | BI282011  | START domain containing 7 (predicted)                                                     | Stard7_predicted | 0.834 | 0.073 | 0.759 | 0.010 | 0.932 | 0.958 | 0.773 | 0.025 |
| 1384665_at   | BF549590  | START domain containing 7 (predicted)                                                     | Stard7_predicted | 0.922 | 0.773 | 0.867 | 0.554 | 1.218 | 0.193 | 0.872 | 0.608 |
| 1386857_at   | NM_017166 | stathmin 1                                                                                | Stmn1            | 0.780 | 0.456 | 1.418 | 0.098 | 0.668 | 0.135 | 1.013 | 0.801 |
| 1370041_at   | NM_053440 | stathmin-like 2                                                                           | Stmn2            | 1.793 | 0.022 | 0.774 | 0.008 | 1.151 | 0.490 | 0.738 | 0.017 |
| 1370042_at   | BG668493  | stathmin-like 2                                                                           | Stmn2            | 1.525 | 0.276 | 0.758 | 0.142 | 1.319 | 0.110 | 1.147 | 0.739 |
| 1368157_at   | NM_024346 | stathmin-like 3                                                                           | Stmn3            | 0.739 | 0.080 | 0.539 | 0.009 | 0.520 | 0.006 | 0.399 | 0.001 |
| 1387051_at   | NM_053436 | staufer RNA binding protein homolog 1 (Drosophila)                                        | Stau1            | 0.875 | 0.286 | 1.046 | 0.566 | 0.597 | 0.003 | 0.920 | 0.151 |
| 1379754_at   | AI070598  | staufer, RNA binding protein, homolog 2 (Drosophila)                                      | Stau2            | 7.721 | 0.002 | 2.374 | 0.003 | 8.366 | 0.005 | 2.804 | 0.015 |
| 1370680_at   | AF483620  | staufer, RNA binding protein, homolog 2 (Drosophila)                                      | Stau2            | 6.281 | 0.008 | 2.189 | 0.027 | 6.102 | 0.006 | 2.581 | 0.017 |
| 1390558_at   | AI502229  | staufer, RNA binding protein, homolog 2 (Drosophila)                                      | Stau2            | 1.157 | 0.717 | 0.921 | 0.291 | 0.950 | 0.787 | 0.649 | 0.055 |
| 1370355_at   | J02585    | stearoyl-Coenzyme A desaturase 1                                                          | Scd1             | 0.956 | 0.943 | 1.440 | 0.043 | 2.102 | 0.240 | 2.103 | 0.013 |
| 1388253_at   | M15114    | Stearoyl-Coenzyme A desaturase 2                                                          | Scd2             | 0.597 | 0.285 | 0.519 | 0.000 | 0.445 | 0.169 | 0.613 | 0.002 |



|            |           |                                                                                         |                 |       |       |       |       |       |       |       |       |
|------------|-----------|-----------------------------------------------------------------------------------------|-----------------|-------|-------|-------|-------|-------|-------|-------|-------|
| 1367668_at | NM_031841 | stearoyl-Coenzyme A desaturase 2                                                        | Scd2            | 0.755 | 0.340 | 0.769 | 0.035 | 0.690 | 0.054 | 0.799 | 0.148 |
| 1386889_at | BE107760  | stearoyl-Coenzyme A desaturase 2                                                        | Scd2            | 0.830 | 0.969 | 0.374 | 0.027 | 0.823 | 0.108 | 0.293 | 0.020 |
| 1374007_at | AI178499  | Step II splicing factor SLU7 ( <i>S. cerevisiae</i> )                                   | Slu7            | 0.528 | 0.018 | 1.052 | 0.224 | 0.566 | 0.105 | 0.974 | 0.766 |
| 1386856_at | AA859633  | sterile alpha motif domain containing 4B                                                | Samd4b          | 0.848 | 0.097 | 1.345 | 0.244 | 1.150 | 0.393 | 1.330 | 0.090 |
| 1393932_at | AI060175  | sterile alpha motif domain containing 8                                                 | Samd8           | 0.919 | 0.690 | 4.268 | 0.005 | 1.155 | 0.382 | 3.500 | 0.004 |
| 1370420_at | J05035    | steroid 5 alpha-reductase 1                                                             | Srd5a1          | 0.640 | 0.006 | 1.001 | 0.602 | 0.818 | 0.098 | 1.005 | 0.810 |
| 1371718_at | BI283124  | steroid receptor RNA activator 1                                                        | Sra1            | 0.600 | 0.259 | 0.619 | 0.063 | 0.512 | 0.010 | 0.741 | 0.012 |
| 1368372_at | NM_012661 | steroid sulfatase                                                                       | Sts             | 0.805 | 0.701 | 1.184 | 0.142 | 1.083 | 0.921 | 1.237 | 0.723 |
| 1387896_at | M62763    | sterol carrier protein 2                                                                | Scp2            | 0.817 | 0.551 | 0.545 | 0.003 | 1.575 | 0.566 | 0.671 | 0.096 |
| 1370296_at | M34728    | sterol carrier protein 2                                                                | Scp2            | 0.752 | 0.569 | 0.426 | 0.006 | 0.764 | 0.236 | 0.498 | 0.017 |
| 1373869_at | AI012418  | sterol O-acyltransferase 1                                                              | Soat1           | 0.251 | 0.044 | 0.278 | 0.000 | 0.204 | 0.000 | 0.250 | 0.001 |
| 1374976_at | AI548897  | Sterol O-acyltransferase 1                                                              | Soat1           | 0.298 | 0.061 | 0.723 | 0.013 | 0.302 | 0.026 | 0.461 | 0.000 |
| 1388426_at | BF398848  | sterol regulatory element binding factor 1                                              | Sreb1           | 0.674 | 0.030 | 1.106 | 0.381 | 0.675 | 0.204 | 0.998 | 0.422 |
| 1383159_at | AW434445  | Sterol regulatory element binding factor 1                                              | Sreb1           | 0.989 | 0.534 | 1.125 | 0.046 | 0.934 | 0.769 | 1.265 | 0.199 |
| 1371979_at | AI170663  | sterol regulatory element binding factor 2 (predicted)                                  | Sreb2_predicted | 0.869 | 0.469 | 0.448 | 0.009 | 0.870 | 0.900 | 0.431 | 0.009 |
| 1368275_at | NM_080886 | sterol-C4-methyl oxidase-like                                                           | Sc4mol          | 0.864 | 0.763 | 1.349 | 0.033 | 0.685 | 0.785 | 1.099 | 0.573 |
| 1390777_at | AI710051  | sterol-C5-desaturase (fungal ERG3, delta-5-desaturase) homolog ( <i>S. cerevisiae</i> ) | Sc5d            | 0.646 | 0.097 | 0.743 | 0.192 | 0.493 | 0.004 | 0.635 | 0.082 |
| 1387926_at | AB052846  | sterol-C5-desaturase (fungal ERG3, delta-5-desaturase) homolog ( <i>S. cerevisiae</i> ) | Sc5d            | 0.512 | 0.557 | 0.525 | 0.007 | 0.236 | 0.003 | 0.471 | 0.002 |
| 1398910_at | BI280327  | STIP1 homology and U-Box containing protein 1                                           | Stub1           | 0.658 | 0.054 | 1.065 | 0.060 | 0.697 | 0.013 | 0.920 | 0.059 |
| 1398908_at | AA799462  | stomatin (Epb7.2)-like 2                                                                | Stoml2          | 0.703 | 0.467 | 1.467 | 0.144 | 0.646 | 0.062 | 1.129 | 0.652 |
| 1383508_at | AW528853  | stomatin (Epb7.2)-like 3 (predicted)                                                    | Stom3_predicted | 0.717 | 0.939 | 0.432 | 0.004 | 1.476 | 0.566 | 0.628 | 0.435 |
| 1380981_at | AW534519  | Stonin 2 (predicted)                                                                    | Ston2_predicted | 2.061 | 0.314 | 1.620 | 0.082 | 0.878 | 0.783 | 1.072 | 0.090 |
| 1382210_at | BE117392  | Strain Wistar Rap2a mRNA, 5' UTR                                                        | ---             | 2.006 | 0.060 | 1.088 | 0.957 | 3.703 | 0.000 | 1.814 | 0.080 |
| 1375096_at | BF418337  | stratifin (predicted)                                                                   | Sfn_predicted   | 1.005 | 0.193 | 1.100 | 0.105 | 0.653 | 0.296 | 1.004 | 0.972 |
| 1392107_at | BI302669  | strawberry notch homolog ( <i>Drosophila</i> ) (predicted)                              | Stno_predicted  | 2.283 | 0.026 | 1.178 | 0.071 | 1.477 | 0.111 | 1.053 | 0.813 |
| 1368844_at | NM_019271 | stress 70 protein chaperone, microsomal-associated, 60kD human homolog                  | Stch            | 0.731 | 0.659 | 0.951 | 0.613 | 0.856 | 0.539 | 1.001 | 0.616 |
| 1398877_at | BI283691  | stress-induced phosphoprotein 1                                                         | Stip1           | 0.646 | 0.254 | 1.451 | 0.044 | 0.622 | 0.159 | 1.328 | 0.071 |
| 1392986_at | AI227920  | striatin, calmodulin binding protein                                                    | Strn            | 0.824 | 0.717 | 1.415 | 0.119 | 0.973 | 0.944 | 1.163 | 0.498 |
| 1375537_at | BE107226  | striatin, calmodulin binding protein 3                                                  | Strn3           | 1.448 | 0.370 | 1.165 | 0.473 | 1.457 | 0.203 | 1.205 | 0.134 |
| 1388835_at | AI575072  | striatin, calmodulin binding protein 4 (predicted)                                      | Strn4_predicted | 0.865 | 0.394 | 0.593 | 0.029 | 0.708 | 0.189 | 0.707 | 0.006 |
| 1385241_at | AI071210  | Stromal antigen 1 (predicted)                                                           | Stag1_predicted | 1.186 | 0.918 | 1.061 | 0.296 | 1.137 | 0.516 | 1.056 | 0.355 |
| 1381259_at | BM391784  | Stromal antigen 1 (predicted)                                                           | Stag1_predicted | 0.725 | 0.988 | 0.905 | 0.906 | 1.320 | 0.329 | 0.770 | 0.343 |
| 1382332_at | AI549167  | stromal antigen 2 (predicted)                                                           | Stag2_predicted | 0.744 | 0.202 | 0.805 | 0.761 | 0.768 | 0.119 | 0.965 | 0.705 |
| 1371645_at | BI284339  | stromal cell derived factor 2 (predicted)                                               | Sdf2_predicted  | 0.663 | 0.815 | 0.900 | 0.162 | 0.873 | 0.256 | 0.894 | 0.244 |
| 1387778_at | NM_130412 | stromal cell derived factor 4                                                           | Sdf4            | 0.812 | 0.626 | 0.698 | 0.004 | 0.826 | 0.007 | 0.642 | 0.001 |
| 1387016_at | NM_019380 | stromal cell derived factor receptor 1                                                  | Sdfr1           | 1.084 | 0.013 | 0.864 | 0.031 | 1.251 | 0.008 | 1.072 | 0.351 |
| 1378160_at | AI179412  | stromal cell derived factor receptor 2 (predicted)                                      | Sdfr2_predicted | 0.617 | 0.032 | 2.493 | 0.000 | 0.642 | 0.010 | 2.237 | 0.034 |
| 1376024_at | AW914992  | stromal interaction molecule 1 (predicted)                                              | Stim1_predicted | 0.471 | 0.020 | 0.468 | 0.016 | 0.499 | 0.113 | 0.597 | 0.017 |
| 1382121_at | BI292282  | stromal interaction molecule 1 (predicted)                                              | Stim1_predicted | 0.799 | 0.933 | 0.545 | 0.013 | 0.994 | 0.921 | 0.491 | 0.024 |
| 1379279_at | AI234719  | stromal interaction molecule 2 (predicted)                                              | Stim2_predicted | 1.811 | 0.005 | 1.313 | 0.073 | 2.111 | 0.003 | 1.601 | 0.020 |
| 1398062_at | BF404303  | stromal membrane-associated protein 1-like                                              | Smap11          | 1.442 | 0.065 | 1.879 | 0.029 | 1.248 | 0.057 | 1.432 | 0.269 |
| 1372561_at | AI234095  | stromal membrane-associated protein 1-like                                              | Smap11          | 0.823 | 0.194 | 0.271 | 0.001 | 0.754 | 0.070 | 0.265 | 0.021 |
| 1390350_at | BE097445  | stromal membrane-associated protein 1-like                                              | Smap11          | 1.018 | 0.739 | 0.291 | 0.015 | 0.844 | 0.107 | 0.279 | 0.000 |
| 1387026_at | NM_031683 | structural maintenance of chromosomes 1 like 1 ( <i>S. cerevisiae</i> )                 | Smc11           | 1.012 | 0.980 | 2.310 | 0.023 | 1.328 | 0.056 | 2.242 | 0.019 |
| 1388129_at | L08814    | structure specific recognition protein 1                                                | Ssrp1           | 0.838 | 0.337 | 1.906 | 0.018 | 0.766 | 0.075 | 1.957 | 0.031 |
| 1398880_at | BM388890  | SUB1 homolog ( <i>S. cerevisiae</i> )                                                   | Sub1            | 0.686 | 0.060 | 0.591 | 0.110 | 0.782 | 0.284 | 0.805 | 0.029 |
| 1367678_at | NM_130428 | succinate dehydrogenase complex, subunit A, flavoprotein (Fp)                           | Sdha            | 0.657 | 0.192 | 1.212 | 0.265 | 0.722 | 0.080 | 1.248 | 0.402 |
| 1372123_at | AI172320  | succinate dehydrogenase complex, subunit B, iron sulfur (Ip) (predicted)                | Sdhb_predicted  | 0.840 | 0.730 | 1.429 | 0.007 | 0.587 | 0.044 | 1.318 | 0.011 |
| 1380813_at | AA891239  | Succinate dehydrogenase complex, subunit B, iron sulfur (Ip) (predicted)                | Sdhb_predicted  | 0.971 | 0.930 | 0.664 | 0.008 | 0.996 | 0.991 | 0.889 | 0.780 |
| 1371311_at | AI009817  | succinate dehydrogenase complex, subunit C, integral membrane protein                   | Sdhc            | 0.828 | 0.370 | 0.854 | 0.089 | 0.911 | 0.544 | 0.897 | 0.080 |
| 1388294_at | AI176608  | succinate dehydrogenase complex, subunit D, integral membrane protein                   | Sdhd            | 0.487 | 0.117 | 1.157 | 0.063 | 0.440 | 0.016 | 1.162 | 0.015 |
| 1371296_at | AI410703  | succinate dehydrogenase complex, subunit D, integral membrane protein                   | Sdhd            | 0.494 | 0.251 | 0.991 | 0.969 | 0.443 | 0.029 | 1.144 | 0.245 |
| 1367642_at | NM_053752 | succinate-CoA ligase, GDP-forming, alpha subunit                                        | Suclg1          | 0.665 | 0.208 | 0.861 | 0.791 | 0.741 | 0.052 | 0.954 | 0.467 |
| 1388975_at | AA923982  | succinate-Coenzyme A ligase, ADP-forming, beta subunit (predicted)                      | Sucl2_predicted | 0.341 | 0.084 | 1.010 | 0.326 | 0.354 | 0.013 | 1.010 | 0.729 |
| 1373017_at | AI237518  | succinate-Coenzyme A ligase, GDP-forming, beta subunit                                  | Suclg2          | 0.837 | 0.829 | 0.647 | 0.001 | 0.843 | 0.189 | 0.889 | 0.056 |
| 1395293_at | BF388802  | Sulfatase 2                                                                             | Sulf2           | 1.001 | 0.440 | 0.811 | 0.357 | 1.285 | 0.363 | 0.913 | 0.666 |
| 1372422_at | AI175506  | Sulfatase modifying factor 1 (predicted)                                                | Sumf1_predicted | 0.322 | 0.118 | 0.172 | 0.030 | 0.210 | 0.000 | 0.216 | 0.096 |
| 1389833_at | BF285924  | Sulfatase modifying factor 1 (predicted)                                                | Sumf1_predicted | 0.517 | 0.208 | 0.211 | 0.008 | 0.513 | 0.209 | 0.212 | 0.001 |
| 1374588_at | BM389462  | sulfatase modifying factor 1 (predicted)                                                | Sumf1_predicted | 0.871 | 0.728 | 1.336 | 0.006 | 0.840 | 0.221 | 1.185 | 0.174 |
| 1381979_at | AA964066  | sulfatase modifying factor 2                                                            | Sumf2           | 0.701 | 0.138 | 0.999 | 0.681 | 0.436 | 0.109 | 0.908 | 0.699 |
| 1384331_at | H31896    | Sulfiredoxin 1 homolog ( <i>S. cerevisiae</i> )                                         | Srxn1           | 0.370 | 0.018 | 4.564 | 0.023 | 0.364 | 0.007 | 4.396 | 0.001 |

|              |           |                                                                                                               |                                             |        |       |        |       |       |       |       |       |
|--------------|-----------|---------------------------------------------------------------------------------------------------------------|---------------------------------------------|--------|-------|--------|-------|-------|-------|-------|-------|
| 1372510_at   | AI172302  | Sulfiredoxin 1 homolog ( <i>S. cerevisiae</i> )                                                               | Srxn1                                       | 0.358  | 0.108 | 3.527  | 0.002 | 0.212 | 0.001 | 2.868 | 0.001 |
| 1370036_at   | NM_031127 | sulfite oxidase                                                                                               | Suox                                        | 0.279  | 0.112 | 0.082  | 0.002 | 0.319 | 0.007 | 0.125 | 0.014 |
| 1388526_at   | AI169075  | Sulfotransferase family, cytosolic, 2B, member 1 (predicted)                                                  | Sult2b1_predicted                           | 0.275  | 0.006 | 0.191  | 0.000 | 0.392 | 0.006 | 0.192 | 0.036 |
| 1371650_at   | BI275947  | SUMO/sentrin specific peptidase 3                                                                             | Senp3                                       | 0.890  | 0.036 | 0.778  | 0.022 | 0.811 | 0.033 | 0.869 | 0.054 |
| 1374580_at   | AW535691  | SUMO/sentrin specific peptidase 6 (predicted)                                                                 | Senp6_predicted                             | 0.948  | 0.362 | 1.145  | 0.049 | 0.836 | 0.034 | 1.145 | 0.019 |
| 1397812_at   | H32530    | SUMO/sentrin specific peptidase 6 (predicted)                                                                 | Senp6_predicted                             | 0.924  | 0.546 | 1.220  | 0.773 | 0.814 | 0.165 | 0.809 | 0.165 |
| 1372386_at   | AW530777  | SUMO/sentrin specific protease 2                                                                              | Senp2                                       | 1.068  | 0.828 | 1.178  | 0.033 | 1.131 | 0.132 | 1.239 | 0.014 |
| 1391262_at   | BE105606  | SUMO/sentrin specific protease 5 (predicted) /// similar to SUMO/sentrin specific protease 5 (predicted)      | Senp5_predicted ///<br>RGD1564247_predicted | 1.022  | 0.680 | 0.936  | 0.618 | 1.201 | 0.725 | 0.890 | 0.381 |
| 1394086_at   | AI069981  | SUMO1/sentrin specific protease 7 (predicted)                                                                 | Senp7_predicted                             | 1.737  | 0.013 | 0.979  | 0.556 | 3.111 | 0.010 | 0.882 | 0.596 |
| 1367641_at   | NM_017050 | superoxide dismutase 1                                                                                        | Sod1                                        | 0.771  | 0.374 | 0.781  | 0.032 | 0.763 | 0.021 | 0.834 | 0.134 |
| 1370173_at   | BG671549  | superoxide dismutase 2, mitochondrial                                                                         | Sod2                                        | 6.741  | 0.000 | 7.513  | 0.002 | 7.021 | 0.000 | 5.526 | 0.000 |
| 1370172_at   | AA892254  | superoxide dismutase 2, mitochondrial                                                                         | Sod2                                        | 8.687  | 0.001 | 13.068 | 0.000 | 9.232 | 0.001 | 9.183 | 0.000 |
| 1391004_at   | AW535541  | Supervillin (predicted)                                                                                       | Svil_predicted                              | 2.581  | 0.024 | 0.691  | 0.057 | 1.057 | 0.076 | 0.628 | 0.138 |
| 1376572_a_at | AI045848  | supervillin (predicted)                                                                                       | Svil_predicted                              | 1.906  | 0.127 | 0.748  | 0.268 | 0.839 | 0.512 | 0.695 | 0.092 |
| 1398848_at   | BG377057  | suppression of tumorigenicity 13                                                                              | St13                                        | 1.151  | 0.521 | 2.019  | 0.009 | 0.968 | 0.660 | 1.878 | 0.020 |
| 1387195_at   | AB049189  | suppression of tumorigenicity 14 (colon carcinoma)                                                            | St14                                        | 16.177 | 0.013 | 7.784  | 0.001 | 1.031 | 0.946 | 1.015 | 0.048 |
| 1370658_a_at | AF031942  | suppression of tumorigenicity 18                                                                              | St18                                        | 0.550  | 0.152 | 0.321  | 0.079 | 0.692 | 0.162 | 0.357 | 0.015 |
| 1373288_at   | BG373023  | suppression of tumorigenicity 5 (predicted)                                                                   | St5_predicted                               | 1.940  | 0.050 | 1.064  | 0.910 | 1.685 | 0.173 | 0.922 | 0.676 |
| 1392925_at   | BI132374  | suppression of tumorigenicity 7                                                                               | ST7                                         | 0.932  | 0.900 | 1.247  | 0.290 | 1.164 | 0.422 | 1.441 | 0.006 |
| 1379842_at   | H33639    | suppression of tumorigenicity 7-like                                                                          | St7l                                        | 0.745  | 0.332 | 0.979  | 0.847 | 0.634 | 0.190 | 0.997 | 0.957 |
| 1390977_at   | AW527529  | suppression of tumorigenicity 7-like                                                                          | St7l                                        | 0.967  | 0.866 | 0.835  | 0.024 | 0.950 | 0.943 | 0.770 | 0.020 |
| 1375568_at   | AI029171  | Suppressor of cytokine signaling 1                                                                            | Socs1                                       | 2.372  | 0.054 | 1.002  | 0.982 | 1.335 | 0.091 | 1.000 | 0.978 |
| 1376666_at   | AI170864  | suppressor of cytokine signaling 6 (predicted)                                                                | Socs6_predicted                             | 0.903  | 0.516 | 1.510  | 0.007 | 1.282 | 0.665 | 1.369 | 0.040 |
| 1391484_at   | BF284786  | Suppressor of cytokine signaling 7 (predicted)                                                                | Socs7_predicted                             | 1.322  | 0.034 | 1.246  | 0.005 | 1.530 | 0.024 | 1.409 | 0.028 |
| 1389060_at   | BI297313  | Suppressor of cytokine signaling 7 (predicted)                                                                | Socs7_predicted                             | 1.439  | 0.367 | 1.274  | 0.125 | 1.694 | 0.051 | 1.777 | 0.566 |
| 1371378_at   | BM389078  | suppressor of initiator codon mutations, related sequence 1 ( <i>S. cerevisiae</i> ) (predicted)              | Sui1-rs1_predicted                          | 0.728  | 0.239 | 0.832  | 0.050 | 0.684 | 0.027 | 0.788 | 0.022 |
| 1388310_at   | AI012372  | suppressor of initiator codon mutations, related sequence 1 ( <i>S. cerevisiae</i> ) (predicted)              | Sui1-rs1_predicted                          | 0.976  | 0.991 | 1.495  | 0.001 | 0.750 | 0.099 | 1.372 | 0.001 |
| 1377281_at   | BM388545  | Suppressor of Ty 16 homolog ( <i>S. cerevisiae</i> ) (predicted)                                              | Supt16h_predicted                           | 0.596  | 0.041 | 0.841  | 0.059 | 0.583 | 0.057 | 0.967 | 0.400 |
| 1398980_at   | AW253429  | suppressor of Ty 16 homolog ( <i>S. cerevisiae</i> ) (predicted)                                              | Supt16h_predicted                           | 0.896  | 0.258 | 1.083  | 0.053 | 0.768 | 0.180 | 1.188 | 0.028 |
| 1398987_at   | AW141261  | suppressor of Ty 4 homolog 2 ( <i>S. cerevisiae</i> ) (predicted)                                             | Supt4h2_predicted                           | 1.027  | 0.941 | 0.977  | 0.186 | 0.876 | 0.011 | 1.052 | 0.074 |
| 1372094_at   | BG380556  | suppressor of Ty 5 homolog ( <i>S. cerevisiae</i> )                                                           | Supt5h                                      | 0.885  | 0.295 | 1.263  | 0.605 | 0.844 | 0.275 | 1.208 | 0.272 |
| 1374398_at   | AI178787  | suppressor of Ty 6 homolog ( <i>S. cerevisiae</i> )                                                           | Supt6h                                      | 0.764  | 0.008 | 1.015  | 0.980 | 0.715 | 0.011 | 0.982 | 0.826 |
| 1372350_at   | BI297676  | suppressor of var1, 3-like 1 ( <i>S. cerevisiae</i> )                                                         | Supv31l                                     | 0.997  | 0.976 | 1.102  | 0.970 | 1.000 | 0.968 | 1.019 | 0.626 |
| 1375981_a_at | AA997899  | suppressor of variegation 3-9 homolog 1 ( <i>Drosophila</i> ) (predicted)                                     | Suv39h1_predicted                           | 1.950  | 0.001 | 6.036  | 0.002 | 2.761 | 0.001 | 4.466 | 0.014 |
| 1389620_at   | AW525235  | suppressor of variegation 4-20 homolog 2 ( <i>Drosophila</i> ) (predicted)                                    | Suv420h2_predicted                          | 0.856  | 0.228 | 1.961  | 0.100 | 1.160 | 0.256 | 1.277 | 0.199 |
| 1384664_at   | AI233855  | surfactant associated protein B                                                                               | Sftpb                                       | 0.976  | 0.243 | 0.466  | 0.133 | 1.027 | 0.493 | 0.999 | 0.459 |
| 1398857_at   | AF182952  | surfeit 1                                                                                                     | Surf1                                       | 0.604  | 0.082 | 0.917  | 0.245 | 0.659 | 0.014 | 1.143 | 0.576 |
| 1388658_at   | AA942704  | surfeit 2                                                                                                     | Surf2                                       | 0.431  | 0.000 | 0.898  | 0.152 | 0.461 | 0.052 | 0.736 | 0.022 |
| 1389973_a_at | BE112262  | surfeit 4                                                                                                     | Surf4                                       | 0.657  | 0.017 | 1.174  | 0.059 | 0.722 | 0.069 | 0.977 | 0.654 |
| 1371791_at   | AI227937  | surfeit 4                                                                                                     | Surf4                                       | 0.540  | 0.660 | 0.916  | 0.405 | 0.803 | 0.199 | 0.838 | 0.097 |
| 1390290_at   | BF396659  | surfeit gene 6 (predicted)                                                                                    | Surf6_predicted                             | 1.466  | 0.130 | 1.936  | 0.022 | 1.226 | 0.025 | 1.634 | 0.016 |
| 1388979_at   | BM390864  | survival motor neuron domain containing 1                                                                     | Smndc1                                      | 0.950  | 0.866 | 2.209  | 0.045 | 0.997 | 0.443 | 1.642 | 0.060 |
| 1382165_at   | BI288396  | survival motor neuron domain containing 1                                                                     | Smndc1                                      | 0.887  | 0.881 | 1.495  | 0.586 | 1.265 | 0.182 | 1.794 | 0.183 |
| 1367883_at   | NM_022509 | survival of motor neuron 1, telomeric                                                                         | Smn1                                        | 1.082  | 0.614 | 2.561  | 0.001 | 0.928 | 0.959 | 2.024 | 0.002 |
| 1368229_at   | NM_053389 | survival of motor neuron protein interacting protein 1                                                        | Sip1                                        | 0.407  | 0.069 | 0.599  | 0.130 | 0.387 | 0.059 | 0.715 | 0.149 |
| 1379960_at   | AI406705  | Sushi domain containing 3 (predicted)                                                                         | Susd3_predicted                             | 1.000  | 0.992 | 1.048  | 0.848 | 1.001 | 0.197 | 1.006 | 0.978 |
| 1373706_at   | BI281981  | Swi/SNF related matrix associated, actin dependent regulator of chromatin, subfamily a-like 1 (predicted)     | Smarca1_predicted                           | 1.001  | 0.490 | 0.947  | 0.112 | 1.004 | 0.493 | 0.828 | 0.068 |
| 1384437_at   | AI576309  | SWI/SNF related, matrix associated, actin dependent regulator of chromatin, subfamily a, member 1 (predicted) | Smarca1_predicted                           | 1.006  | 0.140 | 0.582  | 0.010 | 0.955 | 0.672 | 0.877 | 0.256 |
| 1394066_at   | AA875609  | SWI/SNF related, matrix associated, actin dependent regulator of chromatin, subfamily a, member 2             | Smarca2                                     | 0.426  | 0.039 | 0.428  | 0.035 | 1.120 | 0.776 | 0.716 | 0.157 |
| 1385074_at   | BE102268  | SWI/SNF related, matrix associated, actin dependent regulator of chromatin, subfamily a, member 2             | Smarca2                                     | 0.163  | 0.067 | 0.429  | 0.205 | 0.694 | 0.105 | 0.430 | 0.234 |
| 1376337_at   | AI170385  | SWI/SNF related, matrix associated, actin dependent regulator of chromatin, subfamily a, member 2             | Smarca2                                     | 0.734  | 0.103 | 0.510  | 0.000 | 1.108 | 0.296 | 0.800 | 0.046 |
| 1397165_at   | BF547582  | SWI/SNF related, matrix associated, actin dependent regulator of chromatin, subfamily a, member 2             | Smarca2                                     | 0.833  | 0.128 | 0.583  | 0.029 | 0.856 | 0.224 | 0.840 | 0.366 |
| 1373565_at   | BE329013  | SWI/SNF related, matrix associated, actin dependent regulator of chromatin, subfamily a, member 4             | Smarca4                                     | 0.786  | 0.385 | 0.864  | 0.183 | 0.676 | 0.098 | 0.799 | 0.069 |
| 1375469_at   | BE111847  | SWI/SNF related, matrix associated, actin dependent regulator of chromatin, subfamily a, member 4             | Smarca4                                     | 0.806  | 0.693 | 0.677  | 0.969 | 0.636 | 0.166 | 0.742 | 0.501 |
| 1384246_at   | AA996404  | SWI/SNF related, matrix associated, actin dependent regulator of chromatin, subfamily a, member 5 (predicted) | Smarca5_predicted                           | 0.751  | 0.011 | 0.570  | 0.001 | 0.816 | 0.002 | 0.704 | 0.009 |
| 1394093_at   | BF557855  | SWI/SNF related, matrix associated, actin dependent regulator of chromatin, subfamily a, member 5 (predicted) | Smarca5_predicted                           | 1.078  | 0.686 | 0.464  | 0.011 | 0.959 | 0.586 | 0.668 | 0.049 |
| 1379327_at   | BI292524  | SWI/SNF related, matrix associated, actin dependent regulator of chromatin, subfamily a, member 5 (predicted) | Smarca5_predicted                           | 0.856  | 0.909 | 1.596  | 0.004 | 0.904 | 0.557 | 1.163 | 0.075 |
| 1371914_at   | AI406553  | SWI/SNF related, matrix associated, actin dependent regulator of chromatin, subfamily b, member 1             | Smarb1                                      | 0.978  | 0.749 | 1.250  | 0.114 | 0.837 | 0.196 | 1.227 | 0.083 |
| 1374182_at   | AA965063  | SWI/SNF related, matrix associated, actin dependent regulator of chromatin, subfamily c, member 1 (predicted) | Smarc1_predicted                            | 1.007  | 0.560 | 1.290  | 0.688 | 1.078 | 0.154 | 1.335 | 0.185 |
| 1370159_at   | AB003505  | SWI/SNF related, matrix associated, actin dependent regulator of chromatin, subfamily d, member 2             | Smard2                                      | 1.855  | 0.011 | 1.009  | 0.368 | 3.044 | 0.005 | 1.647 | 0.023 |

|              |           |                                                                                                   |                 |       |       |       |       |        |       |       |       |
|--------------|-----------|---------------------------------------------------------------------------------------------------|-----------------|-------|-------|-------|-------|--------|-------|-------|-------|
| 1377473_at   | BE349749  | SWI/SNF related, matrix associated, actin dependent regulator of chromatin, subfamily d, member 3 | Smarcd3         | 0.367 | 0.032 | 0.326 | 0.010 | 0.659  | 0.962 | 0.964 | 0.898 |
| 1398244_at   | NM_133417 | SYF2 homolog, RNA splicing factor ( <i>S. cerevisiae</i> )                                        | Syf2            | 1.467 | 0.164 | 1.841 | 0.033 | 0.878  | 0.619 | 1.683 | 0.041 |
| 1374733_at   | BM387193  | symplekin                                                                                         | Sympk           | 1.162 | 0.565 | 0.830 | 0.815 | 1.006  | 0.980 | 0.920 | 0.756 |
| 1379635_at   | BF399325  | synapse associated protein 1                                                                      | Syap1           | 1.589 | 0.017 | 0.778 | 0.387 | 1.450  | 0.052 | 1.124 | 0.969 |
| 1392599_at   | BE111132  | synapse associated protein 1                                                                      | Syap1           | 1.221 | 0.265 | 1.347 | 0.029 | 1.608  | 0.106 | 1.387 | 0.026 |
| 1390196_at   | BG378858  | Synapsin I                                                                                        | Syn1            | 2.724 | 0.129 | 1.184 | 0.502 | 3.559  | 0.000 | 1.609 | 0.099 |
| 1388811_at   | BF401593  | Synapsin II                                                                                       | Syn2            | 1.413 | 0.363 | 0.322 | 0.007 | 0.888  | 0.524 | 0.268 | 0.006 |
| 1383399_at   | AI574728  | synaptic vesicle glycoprotein 2a                                                                  | Sv2a            | 0.563 | 0.122 | 0.540 | 0.016 | 0.306  | 0.013 | 0.755 | 0.178 |
| 1369628_at   | BG672437  | synaptic vesicle glycoprotein 2b                                                                  | Sv2b            | 0.933 | 0.385 | 1.039 | 0.033 | 1.113  | 0.210 | 1.072 | 0.040 |
| 1370098_at   | NM_053531 | synaptobrevin-like 1                                                                              | Sybl1           | 0.738 | 0.569 | 0.538 | 0.122 | 0.675  | 0.339 | 0.725 | 0.455 |
| 1369554_at   | NM_053553 | synaptogyrin 2                                                                                    | Syng2           | 0.789 | 0.641 | 1.042 | 0.802 | 0.883  | 0.613 | 1.475 | 0.392 |
| 1388586_at   | BG372397  | synaptojanin 1                                                                                    | Synj1           | 1.606 | 0.030 | 1.240 | 0.005 | 1.341  | 0.153 | 1.060 | 0.170 |
| 1370070_at   | NM_053476 | synaptojanin 1                                                                                    | Synj1           | 1.249 | 0.155 | 0.912 | 0.556 | 1.252  | 0.072 | 0.880 | 0.094 |
| 1368038_at   | AF260258  | synaptojanin 2 binding protein                                                                    | Synj2bp         | 0.630 | 0.091 | 0.383 | 0.013 | 0.782  | 0.438 | 0.598 | 0.069 |
| 1368040_at   | BI285174  | synaptojanin 2 binding protein                                                                    | Synj2bp         | 0.393 | 0.516 | 0.663 | 0.162 | 0.543  | 0.132 | 0.584 | 0.033 |
| 1368041_at   | BF284821  | synaptojanin 2 binding protein                                                                    | Synj2bp         | 1.162 | 0.634 | 1.124 | 0.574 | 0.474  | 0.251 | 0.901 | 0.354 |
| 1387553_at   | NM_012810 | synaptonemal complex protein 1                                                                    | Sycp1           | 1.188 | 0.932 | 0.971 | 0.630 | 1.194  | 0.570 | 2.340 | 0.508 |
| 1368499_at   | NM_130735 | synaptonemal complex protein 2                                                                    | Sycp2           | 0.658 | 0.082 | 0.819 | 0.128 | 1.174  | 0.852 | 0.600 | 0.059 |
| 1387614_at   | NM_013041 | synaptonemal complex protein 3                                                                    | Sycp3           | 0.972 | 0.106 | 0.613 | 0.156 | 1.068  | 0.778 | 0.961 | 0.831 |
| 1368276_at   | NM_012664 | synaptophysin                                                                                     | Syp             | 0.805 | 0.493 | 0.492 | 0.039 | 0.497  | 0.052 | 0.469 | 0.060 |
| 1387073_at   | NM_030991 | synaptosomal-associated protein 25                                                                | Snap25          | 0.656 | 0.032 | 0.573 | 0.002 | 0.640  | 0.001 | 0.594 | 0.001 |
| 1373213_at   | BI274180  | synaptosomal-associated protein 29                                                                | Snap29          | 0.931 | 0.683 | 0.710 | 0.029 | 0.736  | 0.867 | 0.656 | 0.069 |
| 1398568_at   | AW531009  | Synaptosomal-associated protein, 91kDa homolog (mouse)                                            | Snap91          | 1.134 | 0.050 | 1.080 | 0.168 | 1.908  | 0.022 | 1.103 | 0.395 |
| 1373865_at   | BF281248  | synaptosomal-associated protein, 91kDa homolog (mouse)                                            | Snap91          | 1.520 | 0.092 | 0.745 | 0.066 | 2.493  | 0.001 | 1.097 | 0.125 |
| 1398741_at   | BE096677  | Synaptosomal-associated protein, 91kDa homolog (mouse)                                            | Snap91          | 1.268 | 0.170 | 1.175 | 0.003 | 1.910  | 0.075 | 1.062 | 0.341 |
| 1394659_at   | BF289445  | Synaptotagmin binding, cytoplasmic RNA interacting protein                                        | Syncrip         | 1.270 | 0.607 | 2.439 | 0.036 | 0.993  | 0.967 | 1.391 | 0.334 |
| 1382923_at   | AI072424  | synaptotagmin binding, cytoplasmic RNA interacting protein                                        | Syncrip         | 0.517 | 0.691 | 6.247 | 0.020 | 0.509  | 0.108 | 3.357 | 0.002 |
| 1392071_at   | BF392945  | Synaptotagmin I                                                                                   | Syt1            | 1.068 | 0.487 | 0.995 | 0.883 | 2.035  | 0.170 | 1.001 | 0.993 |
| 1375877_at   | AI454612  | synaptotagmin IV                                                                                  | Syt4            | 0.614 | 0.039 | 0.948 | 0.658 | 0.632  | 0.000 | 0.875 | 0.240 |
| 1387662_at   | L38247    | synaptotagmin IV                                                                                  | Syt4            | 0.539 | 0.132 | 0.979 | 0.520 | 0.263  | 0.089 | 0.381 | 0.079 |
| 1368417_at   | NM_019350 | synaptotagmin V                                                                                   | Syt5            | 0.697 | 0.615 | 0.699 | 0.108 | 0.776  | 0.267 | 0.620 | 0.111 |
| 1374427_at   | AI144986  | Synaptotagmin XIII                                                                                | Syt13           | 0.726 | 0.099 | 0.479 | 0.003 | 0.444  | 0.004 | 0.540 | 0.017 |
| 1387517_at   | NM_030839 | synaptotagmin XIII                                                                                | Syt13           | 0.950 | 0.512 | 0.163 | 0.020 | 0.948  | 0.141 | 0.215 | 0.026 |
| 1369457_a_at | AF419342  | synaptotagmin-like 4                                                                              | Syt14           | 0.776 | 0.460 | 0.113 | 0.006 | 0.778  | 0.450 | 0.097 | 0.001 |
| 1367849_at   | NM_013026 | syndecan 1                                                                                        | Sdc1            | 0.884 | 0.746 | 0.868 | 0.229 | 1.058  | 0.612 | 0.908 | 0.809 |
| 1370166_at   | AI169682  | syndecan 2                                                                                        | Sdc2            | 0.415 | 0.269 | 0.322 | 0.005 | 0.490  | 0.071 | 0.482 | 0.005 |
| 1370167_at   | BG668421  | syndecan 2                                                                                        | Sdc2            | 0.520 | 0.303 | 0.432 | 0.000 | 0.567  | 0.036 | 0.469 | 0.031 |
| 1367721_at   | NM_012649 | syndecan 4                                                                                        | Sdc4            | 8.336 | 0.003 | 2.754 | 0.006 | 10.825 | 0.002 | 2.453 | 0.005 |
| 1398762_at   | NM_031986 | syndecan binding protein                                                                          | Sdcbp           | 1.442 | 0.001 | 2.297 | 0.002 | 1.234  | 0.052 | 1.575 | 0.011 |
| 1376973_at   | BM386609  | syndecan binding protein (syntenin) 2                                                             | Sdcbp2          | 2.604 | 0.078 | 1.051 | 0.550 | 1.344  | 0.062 | 1.080 | 0.274 |
| 1371827_at   | AA946430  | synovial apoptosis inhibitor 1, synoviolin                                                        | Syvn1           | 0.797 | 0.078 | 0.873 | 0.757 | 1.138  | 0.806 | 0.758 | 0.553 |
| 1397489_at   | BE099670  | Synovial sarcoma translocation, Chromosome 18                                                     | Ss18            | 1.667 | 0.348 | 1.397 | 0.674 | 1.005  | 0.204 | 0.944 | 0.700 |
| 1391628_at   | BF418596  | synovial sarcoma translocation, Chromosome 18                                                     | Ss18            | 1.517 | 0.466 | 1.546 | 0.017 | 1.578  | 0.004 | 2.036 | 0.026 |
| 1388431_at   | AA851282  | synovial sarcoma translocation, Chromosome 18                                                     | Ss18            | 0.966 | 0.545 | 0.592 | 0.012 | 1.101  | 0.156 | 0.690 | 0.029 |
| 1373146_at   | AI716240  | synovial sarcoma, X breakpoint 2 interacting protein                                              | Ssx2ip          | 0.626 | 0.020 | 1.014 | 0.922 | 0.677  | 0.018 | 1.289 | 0.064 |
| 1384379_at   | BG668700  | Syntaxin 12                                                                                       | Stx12           | 0.861 | 0.612 | 0.891 | 0.468 | 0.985  | 0.892 | 0.893 | 0.150 |
| 1370192_at   | BF283010  | syntaxin 12                                                                                       | Stx12           | 0.689 | 0.959 | 1.013 | 0.973 | 0.580  | 0.491 | 0.899 | 0.279 |
| 1367530_at   | AI412967  | Syntaxin 16 (predicted)                                                                           | Stx16_predicted | 0.604 | 0.034 | 0.383 | 0.000 | 0.731  | 0.053 | 0.334 | 0.005 |
| 1370597_at   | AF115435  | syntaxin 17                                                                                       | Stx17           | 1.072 | 0.746 | 0.996 | 0.962 | 1.097  | 0.770 | 0.997 | 0.973 |
| 1372512_at   | BE113340  | syntaxin 18                                                                                       | Stx18           | 1.133 | 0.386 | 1.590 | 0.043 | 0.939  | 0.545 | 1.099 | 0.045 |
| 1370014_at   | NM_031125 | syntaxin 4A (placental)                                                                           | Stx4a           | 1.196 | 0.644 | 1.282 | 0.224 | 1.564  | 0.027 | 1.875 | 0.010 |
| 1367878_at   | NM_031704 | syntaxin 5a                                                                                       | Stx5a           | 0.695 | 0.182 | 1.235 | 0.014 | 0.773  | 0.002 | 1.017 | 0.101 |
| 1380639_at   | BI296446  | syntaxin 5a                                                                                       | Stx5a           | 0.854 | 0.432 | 0.852 | 0.262 | 0.792  | 0.471 | 0.615 | 0.421 |
| 1386853_s_at | BI296446  | syntaxin 5a                                                                                       | Stx5a           | 0.621 | 0.944 | 1.086 | 0.843 | 0.983  | 0.317 | 0.725 | 0.042 |
| 1388556_at   | BG381589  | syntaxin 6                                                                                        | Stx6            | 2.555 | 0.010 | 2.311 | 0.007 | 2.565  | 0.004 | 1.361 | 0.052 |
| 1387857_at   | AI406531  | syntaxin 7                                                                                        | Stx7            | 1.226 | 0.664 | 0.671 | 0.015 | 1.796  | 0.159 | 1.217 | 0.264 |
| 1397565_at   | BI296579  | Syntaxin 7                                                                                        | Stx7            | 1.014 | 0.826 | 1.011 | 0.971 | 1.616  | 0.076 | 1.001 | 0.996 |
| 1368070_at   | NM_031656 | syntaxin 8                                                                                        | Stx8            | 0.998 | 0.274 | 1.878 | 0.010 | 0.975  | 0.654 | 1.665 | 0.014 |
| 1398330_at   | BM388715  | syntaxin binding protein 1                                                                        | Stxbp1          | 0.852 | 0.064 | 0.646 | 0.002 | 0.796  | 0.152 | 0.690 | 0.009 |
| 1370519_at   | U06069    | syntaxin binding protein 1                                                                        | Stxbp1          | 0.733 | 0.977 | 0.481 | 0.027 | 0.658  | 0.351 | 0.544 | 0.003 |
| 1383871_at   | BE120348  | Syntaxin binding protein 2                                                                        | Stxbp2          | 0.564 | 0.012 | 0.473 | 0.052 | 1.076  | 0.645 | 0.481 | 0.017 |

|              |           |                                                                                                         |                   |       |       |       |       |       |       |        |       |
|--------------|-----------|---------------------------------------------------------------------------------------------------------|-------------------|-------|-------|-------|-------|-------|-------|--------|-------|
| 1369057_at   | NM_031126 | syntaxin binding protein 2                                                                              | Stxbp2            | 0.879 | 0.402 | 0.819 | 0.281 | 0.724 | 0.362 | 0.801  | 0.284 |
| 1369414_at   | NM_053637 | syntaxin binding protein 3                                                                              | Stxbp3            | 0.978 | 0.457 | 0.818 | 0.080 | 0.994 | 0.857 | 0.835  | 0.091 |
| 1387415_a_at | AF118889  | syntaxin binding protein 5 (tomosyn)                                                                    | Stxbp5            | 1.001 | 0.946 | 0.887 | 0.260 | 0.945 | 0.602 | 0.488  | 0.143 |
| 1367977_at   | NM_019169 | synuclein, alpha                                                                                        | Snca              | 1.004 | 0.754 | 1.381 | 0.879 | 0.663 | 0.225 | 0.577  | 0.135 |
| 1371568_at   | AI145381  | synuclein, beta                                                                                         | Sncb              | 0.285 | 0.001 | 0.537 | 0.109 | 0.204 | 0.003 | 0.389  | 0.064 |
| 1387474_at   | J05097    | tachykinin receptor 1                                                                                   | Tacr1             | 1.131 | 0.605 | 1.410 | 0.029 | 1.135 | 0.611 | 0.998  | 0.655 |
| 1368752_at   | NM_017053 | tachykinin receptor 3                                                                                   | Tacr3             | 0.883 | 0.701 | 0.813 | 0.751 | 0.687 | 0.254 | 0.872  | 0.402 |
| 1398963_at   | BM392226  | TAF10 RNA polymerase II, TATA box binding protein (TBP)-associated factor (predicted)                   | Taf10_predicted   | 0.444 | 0.281 | 0.919 | 0.506 | 0.379 | 0.003 | 0.741  | 0.000 |
| 1389025_at   | BI278688  | TAF11 RNA polymerase II, TATA box binding protein (TBP)-associated factor                               | Taf11             | 1.354 | 0.356 | 0.587 | 0.083 | 1.632 | 0.162 | 0.718  | 0.773 |
| 1374177_at   | AI230912  | TAF13 RNA polymerase II, TATA box binding protein (TBP)-associated factor (predicted)                   | Taf13_predicted   | 0.542 | 0.124 | 0.313 | 0.002 | 0.622 | 0.062 | 0.401  | 0.014 |
| 1383108_at   | BE120513  | TAF13 RNA polymerase II, TATA box binding protein (TBP)-associated factor (predicted)                   | Taf13_predicted   | 0.736 | 0.696 | 0.577 | 0.008 | 0.680 | 0.227 | 0.546  | 0.067 |
| 1393322_at   | AI556910  | TAF15 RNA polymerase II, TATA box binding protein (TBP)-associated factor (predicted)                   | Taf15_predicted   | 1.489 | 0.097 | 1.380 | 0.004 | 1.752 | 0.029 | 1.333  | 0.019 |
| 1392511_at   | AA998513  | TAF2 RNA polymerase II, TATA box binding protein (TBP)-associated factor                                | Taf2              | 0.748 | 0.878 | 0.474 | 0.001 | 0.957 | 0.863 | 0.695  | 0.035 |
| 1392561_at   | BF396279  | TAF3 RNA polymerase II, TATA box binding protein (TBP)-associated factor (predicted)                    | Taf3_predicted    | 0.858 | 0.860 | 1.091 | 0.481 | 1.638 | 0.423 | 1.021  | 0.965 |
| 1376050_at   | AI177663  | TAF5 RNA polymerase II, TATA box binding protein (TBP)-associated factor (predicted)                    | Taf5_predicted    | 2.393 | 0.004 | 1.643 | 0.020 | 1.694 | 0.064 | 2.764  | 0.018 |
| 1373449_at   | BG375861  | TAF5-like RNA polymerase II, p300/CBP-associated factor (PCAF)-associated factor                        | Taf5l             | 1.250 | 0.025 | 1.691 | 0.022 | 0.958 | 0.796 | 1.727  | 0.028 |
| 1384508_at   | AI576469  | TAF6 RNA polymerase II, TATA box binding protein (TBP)-associated factor                                | Taf6              | 1.376 | 0.052 | 1.149 | 0.438 | 3.509 | 0.091 | 1.241  | 0.012 |
| 1388058_at   | D49446    | TAF6 RNA polymerase II, TATA box binding protein (TBP)-associated factor                                | Taf6              | 1.128 | 0.180 | 1.385 | 0.186 | 1.706 | 0.101 | 1.550  | 0.003 |
| 1389174_s_at | AI234857  | TAF6 RNA polymerase II, TATA box binding protein (TBP)-associated factor                                | Taf6              | 1.278 | 0.791 | 1.263 | 0.439 | 1.017 | 0.683 | 1.388  | 0.304 |
| 1375414_at   | AA944572  | TAF9 RNA polymerase II, TATA box binding protein (TBP)-associated factor                                | Taf9              | 0.618 | 0.423 | 1.250 | 0.369 | 0.486 | 0.039 | 1.013  | 0.909 |
| 1373632_at   | AI172041  | TAF9 RNA polymerase II, TATA box binding protein (TBP)-associated factor                                | Taf9              | 1.106 | 0.714 | 1.423 | 0.685 | 0.843 | 0.926 | 1.053  | 0.674 |
| 1368429_at   | NM_133615 | TAF9-like RNA polymerase II, TATA box binding protein (TBP)-associated factor, 31kDa                    | Taf9l             | 0.918 | 0.896 | 0.249 | 0.004 | 0.936 | 0.319 | 0.385  | 0.034 |
| 1372008_at   | BM385175  | tafazzin (cardiomyopathy, dilated 3A (X-linked); endocardial fibroelastosis 2; Barth syndrome) (mapped) | Taz_mapped        | 0.414 | 0.010 | 0.543 | 0.007 | 0.503 | 0.040 | 0.591  | 0.011 |
| 1382036_at   | AA900870  | talin 1                                                                                                 | Tln1              | 1.281 | 0.335 | 0.993 | 0.993 | 1.191 | 0.558 | 0.994  | 0.998 |
| 1389002_at   | BI283756  | talin 1                                                                                                 | Tln1              | 0.999 | 0.781 | 1.078 | 0.744 | 1.155 | 0.851 | 0.998  | 0.461 |
| 1371610_at   | AI411017  | Tankyrase, TRF1-interacting ankyrin-related ADP-ribose polymerase (predicted)                           | Tnks_predicted    | 0.835 | 0.073 | 0.765 | 0.036 | 0.835 | 0.200 | 0.993  | 0.404 |
| 1387140_at   | NM_022702 | TAO kinase 2                                                                                            | Taok2             | 0.647 | 0.974 | 0.724 | 0.104 | 0.943 | 0.679 | 0.973  | 0.597 |
| 1369726_at   | NM_033098 | TAP binding protein                                                                                     | Tapbp             | 5.627 | 0.039 | 8.768 | 0.001 | 4.270 | 0.001 | 14.864 | 0.003 |
| 1372962_at   | AI599123  | TAR (HIV) RNA binding protein 2                                                                         | Tarbp2            | 0.789 | 0.649 | 1.387 | 0.268 | 0.623 | 0.902 | 1.263  | 0.434 |
| 1377608_a_at | BM392298  | TAR DNA binding protein                                                                                 | Tardbp            | 0.871 | 0.142 | 0.795 | 0.021 | 0.953 | 0.639 | 0.883  | 0.162 |
| 1371367_at   | BE107459  | TAR DNA binding protein                                                                                 | Tardbp            | 0.926 | 0.412 | 0.397 | 0.003 | 0.831 | 0.031 | 0.507  | 0.004 |
| 1373927_at   | BI283489  | Target of myb1 homolog (chicken)                                                                        | Tom1              | 1.201 | 0.028 | 1.255 | 0.186 | 1.204 | 0.047 | 1.255  | 0.712 |
| 1372020_at   | BI285561  | target of myb1 homolog (chicken)                                                                        | Tom1              | 0.550 | 0.434 | 2.101 | 0.000 | 0.718 | 0.284 | 1.725  | 0.059 |
| 1382428_at   | AA925658  | taspase, threonine aspartase 1 (predicted)                                                              | Tasp1_predicted   | 0.961 | 0.160 | 1.524 | 0.186 | 1.271 | 0.534 | 0.983  | 0.933 |
| 1382035_at   | AI535480  | TATA box binding protein                                                                                | Tbp               | 1.014 | 0.935 | 0.910 | 0.198 | 0.969 | 0.324 | 0.595  | 0.038 |
| 1373242_at   | AW434020  | TATA box binding protein-like 1 (predicted)                                                             | Tbp1l_predicted   | 1.198 | 0.335 | 1.292 | 0.336 | 1.095 | 0.394 | 1.399  | 0.673 |
| 1376554_at   | BE121079  | TatD DNase domain containing 1 (predicted)                                                              | Tatdn1_predicted  | 1.004 | 0.206 | 1.709 | 0.021 | 0.899 | 0.298 | 1.656  | 0.016 |
| 1398948_at   | AI228250  | Tax1 (human T-cell leukemia virus type I) binding protein 1                                             | Tax1bp1           | 0.875 | 0.686 | 1.403 | 0.007 | 0.826 | 0.153 | 1.170  | 0.041 |
| 1388392_at   | BI274159  | Tax1 (human T-cell leukemia virus type I) binding protein 3                                             | Tax1bp3           | 0.897 | 0.766 | 1.254 | 0.499 | 1.075 | 0.187 | 1.094  | 0.671 |
| 1391861_at   | BI290684  | taxilin beta (predicted)                                                                                | Txlnb_predicted   | 1.065 | 0.900 | 1.561 | 0.372 | 1.030 | 0.862 | 1.194  | 0.511 |
| 1397115_at   | BF409361  | TBC1 domain family, member 1 (predicted)                                                                | Tbcd1_predicted   | 1.938 | 0.374 | 0.811 | 0.527 | 4.222 | 0.040 | 0.606  | 0.377 |
| 1374101_at   | BF282437  | TBC1 domain family, member 10a                                                                          | Tbcd10a           | 0.806 | 0.091 | 2.066 | 0.006 | 0.954 | 0.860 | 1.684  | 0.074 |
| 1375226_at   | BI287864  | TBC1 domain family, member 10b (predicted)                                                              | Tbcd10b_predicted | 0.997 | 0.974 | 1.247 | 0.055 | 0.943 | 0.857 | 0.999  | 0.610 |
| 1388679_at   | AI412244  | TBC1 domain family, member 14                                                                           | Tbcd14            | 0.684 | 0.554 | 0.470 | 0.091 | 0.441 | 0.010 | 0.346  | 0.006 |
| 1388473_at   | BF418041  | TBC1 domain family, member 14                                                                           | Tbcd14            | 1.026 | 0.883 | 0.835 | 0.081 | 1.305 | 0.085 | 0.746  | 0.018 |
| 1382045_at   | BI304056  | TBC1 domain family, member 15                                                                           | Tbcd15            | 1.450 | 0.200 | 1.584 | 0.010 | 1.244 | 0.191 | 1.272  | 0.016 |
| 1385596_at   | BF392191  | TBC1 domain family, member 15                                                                           | Tbcd15            | 1.158 | 0.957 | 4.988 | 0.000 | 2.030 | 0.914 | 2.972  | 0.002 |
| 1379901_at   | BG375857  | TBC1 domain family, member 17 (predicted)                                                               | Tbcd17_predicted  | 0.834 | 0.006 | 1.042 | 0.237 | 0.925 | 0.742 | 1.038  | 0.838 |
| 1396309_at   | BI292839  | TBC1 domain family, member 19 (predicted)                                                               | Tbcd19_predicted  | 0.953 | 0.199 | 0.995 | 0.241 | 0.861 | 0.637 | 0.918  | 0.994 |
| 1383807_at   | BG672767  | TBC1 domain family, member 19 (predicted)                                                               | Tbcd19_predicted  | 1.119 | 0.959 | 1.994 | 0.036 | 0.669 | 0.201 | 1.720  | 0.042 |
| 1395785_at   | BE105453  | TBC1 domain family, member 20                                                                           | Tbcd20            | 1.713 | 0.051 | 1.103 | 0.139 | 1.573 | 0.051 | 1.121  | 0.656 |
| 1372357_at   | BI281833  | TBC1 domain family, member 20                                                                           | Tbcd20            | 1.211 | 0.373 | 1.299 | 0.080 | 0.909 | 0.477 | 1.030  | 0.775 |
| 1373464_at   | BF418962  | TBC1 domain family, member 22a (predicted)                                                              | Tbcd22a_predicted | 2.285 | 0.155 | 1.411 | 0.218 | 0.913 | 0.638 | 1.072  | 0.605 |
| 1381109_at   | BF412395  | TBC1 domain family, member 22a (predicted)                                                              | Tbcd22a_predicted | 0.700 | 0.768 | 1.014 | 0.962 | 1.000 | 0.253 | 1.000  | 0.973 |
| 1383265_at   | BF408403  | TBC1 domain family, member 23 (predicted)                                                               | Tbcd23_predicted  | 0.556 | 0.021 | 0.343 | 0.002 | 0.566 | 0.056 | 0.484  | 0.004 |
| 1385494_at   | BM390350  | TBC1 domain family, member 23 (predicted)                                                               | Tbcd23_predicted  | 0.949 | 0.872 | 0.867 | 0.146 | 0.912 | 0.989 | 0.551  | 0.137 |
| 1372748_at   | BE113335  | TBC1 domain family, member 2B                                                                           | Tbcd2b            | 1.033 | 0.129 | 0.942 | 0.468 | 2.033 | 0.053 | 1.005  | 0.577 |
| 1391497_at   | AA997515  | TBC1D12: TBC1 domain family, member 12 (predicted)                                                      | Tbcd12_predicted  | 5.647 | 0.000 | 2.972 | 0.051 | 3.307 | 0.052 | 3.249  | 0.064 |
| 1379232_at   | AA955771  | TBC1D12: TBC1 domain family, member 12 (predicted)                                                      | Tbcd12_predicted  | 2.109 | 0.014 | 2.808 | 0.017 | 2.431 | 0.162 | 1.692  | 0.101 |
| 1375074_at   | BE113756  | TBK1 binding protein 1                                                                                  | Tbkbp1            | 2.610 | 0.020 | 2.330 | 0.000 | 1.580 | 0.006 | 1.230  | 0.024 |
| 1383916_at   | AW533075  | T-box 15 (predicted)                                                                                    | Tbx15_predicted   | 1.413 | 0.078 | 1.605 | 0.321 | 1.843 | 0.140 | 1.146  | 0.021 |

|              |           |                                                                                                                                                      |                                    |       |       |       |       |       |       |       |       |
|--------------|-----------|------------------------------------------------------------------------------------------------------------------------------------------------------|------------------------------------|-------|-------|-------|-------|-------|-------|-------|-------|
| 1374446_at   | AI179464  | TCDD-inducible poly(ADP-ribose) polymerase (predicted)                                                                                               | Tiparp_predicted                   | 1.329 | 0.046 | 3.779 | 0.000 | 1.540 | 0.022 | 3.423 | 0.004 |
| 1385407_at   | AI511405  | TCDD-inducible poly(ADP-ribose) polymerase (predicted)                                                                                               | Tiparp_predicted                   | 1.093 | 0.172 | 2.441 | 0.074 | 2.827 | 0.024 | 2.077 | 0.002 |
| 1367716_at   | NM_133557 | T-cell immunomodulatory protein                                                                                                                      | Cda08                              | 0.535 | 0.476 | 0.427 | 0.000 | 0.868 | 0.087 | 0.492 | 0.005 |
| 1382448_at   | AI071189  | T-cell immunomodulatory protein                                                                                                                      | Cda08                              | 0.776 | 0.581 | 1.047 | 0.416 | 1.018 | 0.313 | 0.926 | 0.737 |
| 1372507_at   | AA901093  | T-cell leukemia translocation altered gene                                                                                                           | Tcta                               | 0.406 | 0.307 | 0.461 | 0.008 | 0.418 | 0.002 | 0.455 | 0.002 |
| 1381167_at   | BF390767  | T-cell lymphoma invasion and metastasis 1                                                                                                            | Tiam1                              | 3.118 | 0.007 | 3.685 | 0.014 | 2.113 | 0.009 | 2.683 | 0.005 |
| 1374257_at   | BM389265  | T-cell lymphoma invasion and metastasis 1                                                                                                            | Tiam1                              | 2.823 | 0.012 | 1.989 | 0.139 | 4.010 | 0.018 | 1.560 | 0.066 |
| 1392980_at   | AI716456  | T-cell lymphoma invasion and metastasis 1                                                                                                            | Tiam1                              | 2.687 | 0.013 | 2.052 | 0.016 | 2.670 | 0.004 | 1.466 | 0.018 |
| 1371196_at   | M23890    | T-cell receptor beta-chain mRNA V-region (V-D-J-C), clone CRTB188                                                                                    | ---                                | 0.999 | 0.947 | 0.995 | 0.894 | 1.113 | 0.362 | 1.000 | 1.000 |
| 1380019_at   | BM392376  | T-cell, immune regulator 1                                                                                                                           | Tcirg1                             | 1.403 | 0.367 | 1.177 | 0.941 | 2.219 | 0.153 | 1.003 | 0.967 |
| 1385224_at   | AA819531  | T-cell, immune regulator 1                                                                                                                           | Tcirg1                             | 1.003 | 0.955 | 1.049 | 0.439 | 1.121 | 0.983 | 1.051 | 0.563 |
| 1388099_a_at | AB029495  | TCF3 (E2A) fusion partner                                                                                                                            | Tfpt                               | 1.010 | 0.956 | 1.847 | 0.016 | 0.929 | 0.891 | 1.838 | 0.057 |
| 1388471_at   | AA800197  | t-complex 11 (mouse) like 2                                                                                                                          | Tcp112                             | 1.019 | 0.704 | 0.626 | 0.030 | 1.183 | 0.834 | 0.669 | 0.018 |
| 1388903_at   | AI179335  | T-complex associated-testis-expressed 1-like (Protein 91/23) /// similar to T-complex associated-testis-expressed 1-like (Protein 91/23) (predicted) | Tcte11 ///<br>RGD1566162_predicted | 0.964 | 0.951 | 0.411 | 0.002 | 0.784 | 0.173 | 0.567 | 0.002 |
| 1368049_at   | NM_012670 | t-complex protein 1                                                                                                                                  | Tcp1                               | 0.561 | 0.036 | 1.168 | 0.051 | 0.497 | 0.010 | 1.018 | 0.392 |
| 1386882_at   | NM_031318 | t-complex testis expressed 1                                                                                                                         | Tctex1                             | 1.470 | 0.037 | 1.950 | 0.033 | 1.910 | 0.011 | 2.207 | 0.021 |
| 1370916_at   | AI406496  | tec protein tyrosine kinase                                                                                                                          | Tec                                | 0.749 | 0.052 | 1.412 | 0.174 | 0.795 | 0.050 | 1.243 | 0.272 |
| 1368012_at   | NM_022591 | telomerase associated protein 1                                                                                                                      | Tep1                               | 1.450 | 0.015 | 0.947 | 0.813 | 2.596 | 0.014 | 1.233 | 0.269 |
| 1394854_at   | AA818755  | telomeric repeat binding factor 1                                                                                                                    | Terf1                              | 1.467 | 0.102 | 1.510 | 0.085 | 1.580 | 0.275 | 1.679 | 0.138 |
| 1388780_at   | BF395792  | telomeric repeat binding factor 2, interacting protein                                                                                               | Terf2ip                            | 0.482 | 0.737 | 0.492 | 0.000 | 0.608 | 0.265 | 0.659 | 0.006 |
| 1371309_at   | BI276999  | testis enhanced gene transcript                                                                                                                      | Tegt                               | 1.024 | 0.798 | 0.841 | 0.008 | 1.128 | 0.526 | 0.873 | 0.079 |
| 1369879_a_at | NM_019381 | testis enhanced gene transcript                                                                                                                      | Tegt                               | 1.019 | 0.911 | 1.792 | 0.038 | 0.880 | 0.415 | 1.640 | 0.048 |
| 1391440_at   | AW521245  | testis expressed gene 10 (predicted)                                                                                                                 | Tex10_predicted                    | 1.278 | 0.147 | 3.638 | 0.023 | 1.149 | 0.429 | 3.229 | 0.011 |
| 1370453_at   | AF347056  | testis expressed gene 101                                                                                                                            | Tex101                             | 0.984 | 0.862 | 0.995 | 0.953 | 0.998 | 0.612 | 0.996 | 0.923 |
| 1376038_at   | AI411054  | testis expressed gene 2                                                                                                                              | Tex2                               | 0.420 | 0.149 | 0.518 | 0.004 | 0.427 | 0.023 | 0.611 | 0.006 |
| 1373539_at   | BG380686  | Testis expressed gene 261                                                                                                                            | Tex261                             | 0.755 | 0.033 | 0.994 | 0.918 | 0.758 | 0.024 | 1.007 | 0.924 |
| 1389557_at   | BM384037  | testis expressed gene 261                                                                                                                            | Tex261                             | 0.619 | 0.254 | 0.778 | 0.160 | 0.510 | 0.007 | 0.496 | 0.007 |
| 1388463_at   | AW252660  | testis expressed gene 264 homolog (mouse)                                                                                                            | Tex264                             | 1.260 | 0.376 | 4.045 | 0.001 | 0.705 | 0.181 | 2.379 | 0.003 |
| 1388209_at   | AF092091  | testis specific 10                                                                                                                                   | Tsga10                             | 0.245 | 0.056 | 0.040 | 0.000 | 0.239 | 0.057 | 0.041 | 0.000 |
| 1379708_at   | BG381298  | Testis specific 10                                                                                                                                   | Tsga10                             | 0.926 | 0.163 | 0.679 | 0.129 | 0.845 | 0.070 | 0.854 | 0.200 |
| 1395889_at   | AA956651  | Testis specific 10 interacting protein                                                                                                               | Tsga10ip                           | 0.781 | 0.087 | 0.760 | 0.390 | 1.003 | 0.083 | 0.996 | 0.987 |
| 1391228_at   | BE106353  | testis specific gene A2                                                                                                                              | Tsga2                              | 1.088 | 0.844 | 0.973 | 0.073 | 1.124 | 0.951 | 0.788 | 0.064 |
| 1368687_at   | NM_031578 | testis specific protein kinase 1                                                                                                                     | Tesk1                              | 1.020 | 0.969 | 1.535 | 0.024 | 0.668 | 0.038 | 1.090 | 0.041 |
| 1368736_at   | NM_019203 | testis specific X-linked gene                                                                                                                        | Tsx                                | 1.483 | 0.255 | 0.731 | 0.023 | 3.548 | 0.057 | 1.173 | 0.214 |
| 1380091_at   | BF287655  | Testis-specific gene including a ubiquitin-likely domain                                                                                             | Anubl1                             | 2.365 | 0.100 | 0.840 | 0.369 | 1.334 | 0.190 | 0.826 | 0.983 |
| 1394863_at   | AI547767  | Testis-specific kinase 2                                                                                                                             | Tesk2                              | 1.305 | 0.394 | 0.591 | 0.212 | 0.776 | 0.941 | 0.549 | 0.968 |
| 1394772_at   | AW521307  | Testis-specific kinase 2                                                                                                                             | Tesk2                              | 1.590 | 0.703 | 0.848 | 0.579 | 0.862 | 0.567 | 1.079 | 0.478 |
| 1374602_at   | BF407207  | testis-specific protein, Y-encoded-like                                                                                                              | Tspan1                             | 0.491 | 0.144 | 0.550 | 0.003 | 0.575 | 0.023 | 0.565 | 0.007 |
| 1372136_at   | AA848776  | tetraspanin 14 (predicted)                                                                                                                           | Tspan14_predicted                  | 1.115 | 0.926 | 0.857 | 0.513 | 0.761 | 0.059 | 0.642 | 0.283 |
| 1398325_at   | AI172464  | tetraspanin 3                                                                                                                                        | Tspan3                             | 0.754 | 0.427 | 0.594 | 0.004 | 0.731 | 0.013 | 0.553 | 0.002 |
| 1372739_at   | AA818865  | tetraspanin 31                                                                                                                                       | Tspan31                            | 0.958 | 0.323 | 1.681 | 0.008 | 1.264 | 0.118 | 1.517 | 0.005 |
| 1381668_at   | AW528482  | Tetraspanin 5                                                                                                                                        | Tspan5                             | 0.771 | 0.127 | 1.414 | 0.431 | 0.885 | 0.310 | 1.211 | 0.921 |
| 1377089_a_at | BG381571  | tetraspanin 5                                                                                                                                        | Tspan5                             | 0.919 | 0.589 | 0.741 | 0.298 | 0.622 | 0.021 | 0.733 | 0.118 |
| 1394316_a_at | AW920272  | tetraspanin 5                                                                                                                                        | Tspan5                             | 0.866 | 0.708 | 0.733 | 0.275 | 0.501 | 0.038 | 0.780 | 0.571 |
| 1380725_at   | AW251317  | tetraspanin 5                                                                                                                                        | Tspan5                             | 0.886 | 0.791 | 5.917 | 0.004 | 0.266 | 0.002 | 3.755 | 0.002 |
| 1382146_at   | BF412968  | tetraspanin 6                                                                                                                                        | Tspan6                             | 0.502 | 0.319 | 0.290 | 0.004 | 0.627 | 0.111 | 0.314 | 0.050 |
| 1372286_at   | BI295929  | tetraspanin 6                                                                                                                                        | Tspan6                             | 0.774 | 0.728 | 0.436 | 0.025 | 0.725 | 0.204 | 0.506 | 0.004 |
| 1368052_at   | NM_133526 | tetraspanin 8                                                                                                                                        | Tspan8                             | 0.461 | 0.088 | 0.808 | 0.252 | 0.414 | 0.180 | 0.515 | 0.070 |
| 1381119_at   | BM387763  | tetratricopeptide repeat domain 1                                                                                                                    | Ttc1                               | 0.925 | 0.234 | 1.118 | 0.129 | 0.951 | 0.359 | 1.001 | 0.983 |
| 1372712_at   | BG380294  | tetratricopeptide repeat domain 1                                                                                                                    | Ttc1                               | 0.835 | 0.707 | 1.233 | 0.058 | 0.702 | 0.739 | 1.021 | 0.788 |
| 1389052_at   | BI278584  | tetratricopeptide repeat domain 13                                                                                                                   | Ttc13                              | 0.467 | 0.036 | 0.484 | 0.002 | 1.033 | 0.839 | 0.574 | 0.027 |
| 1393758_at   | AI535253  | tetratricopeptide repeat domain 14 (predicted)                                                                                                       | Ttc14_predicted                    | 0.548 | 0.087 | 0.814 | 0.054 | 0.514 | 0.105 | 0.599 | 0.021 |
| 1372854_at   | AI229046  | tetratricopeptide repeat domain 17                                                                                                                   | Ttc17                              | 0.706 | 0.042 | 0.819 | 0.406 | 0.860 | 0.526 | 0.715 | 0.953 |
| 1388806_at   | AI176039  | tetratricopeptide repeat domain 5                                                                                                                    | Ttc5                               | 1.000 | 0.949 | 0.982 | 0.454 | 1.052 | 0.708 | 0.737 | 0.042 |
| 1393457_at   | BI289669  | Tetratricopeptide repeat domain 5                                                                                                                    | Ttc5                               | 0.942 | 0.957 | 1.141 | 0.484 | 0.816 | 0.877 | 0.845 | 0.491 |
| 1376974_at   | BG381669  | tetratricopeptide repeat domain 7                                                                                                                    | Ttc7                               | 2.565 | 0.028 | 2.894 | 0.004 | 2.674 | 0.018 | 1.666 | 0.028 |
| 1376035_at   | BI274308  | Tetratricopeptide repeat domain 7B (predicted)                                                                                                       | Ttc7b_predicted                    | 0.583 | 0.246 | 1.697 | 0.018 | 0.430 | 0.003 | 1.119 | 0.065 |
| 1376613_at   | BI279201  | tetratricopeptide repeat domain 9C                                                                                                                   | Ttc9c                              | 1.466 | 0.009 | 1.165 | 0.144 | 2.040 | 0.001 | 1.403 | 0.007 |
| 1383730_at   | BG668930  | Tetratricopeptide repeat domain 9C                                                                                                                   | Ttc9c                              | 1.364 | 0.018 | 0.814 | 0.062 | 1.434 | 0.089 | 0.857 | 0.323 |
| 1395375_at   | BG672758  | tetratricopeptide repeat domain 9C                                                                                                                   | Ttc9c                              | 1.234 | 0.121 | 1.005 | 0.124 | 2.077 | 0.129 | 1.174 | 0.518 |

|              |           |                                                                    |                  |         |       |        |       |         |       |        |       |
|--------------|-----------|--------------------------------------------------------------------|------------------|---------|-------|--------|-------|---------|-------|--------|-------|
| 1378964_at   | AI709953  | Tetratricopeptide repeat domain 9C                                 | Ttc9c            | 1.057   | 0.853 | 1.153  | 0.355 | 1.366   | 0.015 | 1.411  | 0.090 |
| 1373421_at   | BM392224  | TG interacting factor                                              | Tgif             | 4.918   | 0.003 | 8.613  | 0.000 | 4.204   | 0.006 | 9.880  | 0.001 |
| 1383282_at   | BF543075  | THAP domain containing 11 (predicted)                              | Thap11_predicted | 0.888   | 0.276 | 0.874  | 0.541 | 0.348   | 0.076 | 0.825  | 0.347 |
| 1371557_at   | BI275281  | THAP domain containing 4                                           | Thap4            | 0.765   | 0.561 | 1.441  | 0.035 | 0.624   | 0.014 | 1.277  | 0.611 |
| 1390428_at   | BF555924  | THAP domain containing 6 (predicted)                               | Thap6_predicted  | 0.926   | 0.132 | 0.659  | 0.117 | 0.837   | 0.532 | 0.751  | 0.098 |
| 1374341_at   | AI237866  | THAP domain containing 7                                           | Thap7            | 0.689   | 0.582 | 1.419  | 0.193 | 0.856   | 0.289 | 1.089  | 0.392 |
| 1372412_at   | AA943723  | THAP domain containing, apoptosis associated protein 3 (predicted) | Thap3_predicted  | 0.463   | 0.037 | 0.698  | 0.214 | 0.550   | 0.237 | 0.632  | 0.176 |
| 1388713_at   | AW919094  | thiamine triphosphatase                                            | Thtpa            | 0.667   | 0.044 | 0.534  | 0.012 | 0.702   | 0.020 | 0.649  | 0.216 |
| 1388497_at   | AI411426  | thioesterase superfamily member 2 (predicted)                      | Them2_predicted  | 0.623   | 0.029 | 0.861  | 0.319 | 0.710   | 0.072 | 0.818  | 0.174 |
| 1374640_at   | BE112158  | thioesterase superfamily member 4                                  | Them4            | 1.015   | 0.975 | 1.260  | 0.064 | 1.025   | 0.751 | 1.083  | 0.214 |
| 1370821_at   | AF120100  | Thiopurine methyltransferase                                       | Tpmt             | 0.641   | 0.106 | 0.967  | 0.730 | 0.555   | 0.071 | 0.977  | 0.242 |
| 1378753_at   | AI638971  | thiopurine methyltransferase                                       | Tpmt             | 0.707   | 0.111 | 1.063  | 0.489 | 0.675   | 0.775 | 1.175  | 0.028 |
| 1398839_at   | NM_053800 | thioredoxin 1                                                      | Txn1             | 1.320   | 0.150 | 1.537  | 0.004 | 1.391   | 0.018 | 1.733  | 0.000 |
| 1398844_at   | AA800180  | thioredoxin 2                                                      | Txn2             | 0.578   | 0.548 | 1.322  | 0.194 | 0.553   | 0.055 | 1.515  | 0.008 |
| 1390599_at   | BE101766  | Thioredoxin domain containing 1                                    | Txndc1           | 0.556   | 0.047 | 0.418  | 0.037 | 0.731   | 0.152 | 0.414  | 0.009 |
| 1372067_at   | AI179567  | thioredoxin domain containing 1                                    | Txndc1           | 0.680   | 0.208 | 0.851  | 0.061 | 0.691   | 0.025 | 0.954  | 0.477 |
| 1371565_at   | BM390478  | Thioredoxin domain containing 12 (endoplasmic reticulum)           | Txndc12          | 0.598   | 0.099 | 1.006  | 0.612 | 0.483   | 0.005 | 0.961  | 0.441 |
| 1388523_at   | BM392352  | thioredoxin domain containing 12 (endoplasmic reticulum)           | Txndc12          | 0.716   | 0.310 | 1.507  | 0.098 | 0.729   | 0.036 | 1.340  | 0.054 |
| 1379023_at   | BF406975  | Thioredoxin domain containing 12 (endoplasmic reticulum)           | Txndc12          | 1.142   | 0.702 | 2.217  | 0.013 | 0.679   | 0.029 | 1.425  | 0.035 |
| 1375221_at   | BE109676  | thioredoxin domain containing 13                                   | Txndc13          | 1.179   | 0.113 | 0.819  | 0.013 | 1.037   | 0.205 | 0.866  | 0.138 |
| 1372298_at   | BE098766  | thioredoxin domain containing 4 (endoplasmic reticulum)            | Txndc4           | 0.865   | 0.197 | 1.003  | 0.943 | 0.855   | 0.032 | 0.857  | 0.045 |
| 1395693_at   | BF553613  | thioredoxin domain containing 4 (endoplasmic reticulum)            | Txndc4           | 0.552   | 0.871 | 0.670  | 0.020 | 0.973   | 0.571 | 0.670  | 0.005 |
| 1371391_at   | BM390196  | thioredoxin domain containing 5 (predicted)                        | Txndc5_predicted | 0.532   | 0.382 | 0.701  | 0.043 | 0.519   | 0.008 | 0.600  | 0.029 |
| 1391927_at   | BE100100  | Thioredoxin domain containing 5 (predicted)                        | Txndc5_predicted | 0.807   | 0.609 | 0.798  | 0.314 | 1.066   | 0.796 | 0.979  | 0.678 |
| 1379245_at   | BI283491  | Thioredoxin domain containing 9                                    | Txndc9           | 0.711   | 0.587 | 0.892  | 0.071 | 0.744   | 0.178 | 0.833  | 0.012 |
| 1386958_at   | U63923    | thioredoxin reductase 1                                            | Txnrd1           | 1.345   | 0.125 | 3.241  | 0.003 | 0.925   | 0.408 | 2.259  | 0.003 |
| 1398791_at   | NM_031614 | thioredoxin reductase 1                                            | Txnrd1           | 1.064   | 0.278 | 1.654  | 0.013 | 0.805   | 0.290 | 1.499  | 0.003 |
| 1380191_s_at | BF555110  | thioredoxin-like 1                                                 | Txn1l            | 0.715   | 0.077 | 1.571  | 0.000 | 0.784   | 0.032 | 1.271  | 0.001 |
| 1391789_at   | BF555110  | thioredoxin-like 1                                                 | Txn1l            | 0.835   | 0.239 | 2.552  | 0.013 | 0.956   | 0.453 | 1.315  | 0.119 |
| 1368936_at   | NM_080887 | thioredoxin-like 1                                                 | Txn1l            | 0.588   | 0.757 | 1.211  | 0.064 | 0.474   | 0.092 | 1.185  | 0.249 |
| 1367870_at   | NM_032614 | thioredoxin-like 2                                                 | Txn12            | 0.703   | 0.057 | 2.118  | 0.001 | 0.727   | 0.004 | 2.351  | 0.000 |
| 1372795_at   | BF285089  | thioredoxin-like 4B                                                | Txn14b           | 1.299   | 0.571 | 1.536  | 0.082 | 1.092   | 0.765 | 1.422  | 0.164 |
| 1388555_at   | AI104292  | thioredoxin-like 5 (predicted)                                     | Txn15_predicted  | 0.736   | 0.628 | 1.496  | 0.071 | 0.621   | 0.098 | 1.109  | 0.192 |
| 1396281_at   | BI274269  | Thioredoxin-like 6 (predicted)                                     | Txn16_predicted  | 1.244   | 0.508 | 1.317  | 0.985 | 1.030   | 0.992 | 0.999  | 0.998 |
| 1371796_at   | AA799476  | Thioredoxin-related transmembrane protein 2                        | Tmx2             | 0.545   | 0.031 | 0.934  | 0.676 | 0.634   | 0.028 | 0.852  | 0.304 |
| 1379981_at   | AI170356  | THO complex 1                                                      | Thoc1            | 0.878   | 0.406 | 0.311  | 0.011 | 1.001   | 0.993 | 0.276  | 0.022 |
| 1376641_at   | BM384228  | THO complex 1                                                      | Thoc1            | 1.170   | 0.596 | 1.583  | 0.018 | 0.806   | 0.970 | 1.589  | 0.028 |
| 1386525_at   | AI556851  | THO complex 2 (predicted)                                          | Thoc2_predicted  | 0.909   | 0.672 | 1.478  | 0.031 | 0.881   | 0.224 | 1.493  | 0.470 |
| 1379849_at   | BE098416  | THO complex 3 (predicted)                                          | Thoc3_predicted  | 0.838   | 0.533 | 1.539  | 0.111 | 0.603   | 0.016 | 1.167  | 0.228 |
| 1392671_at   | AA999074  | THO complex 3 (predicted)                                          | Thoc3_predicted  | 0.603   | 0.553 | 1.725  | 0.030 | 0.524   | 0.138 | 1.139  | 0.279 |
| 1392508_at   | BE119831  | three prime histone mRNA exonuclease 1                             | Thex1            | 1.376   | 0.077 | 1.693  | 0.001 | 1.694   | 0.094 | 1.683  | 0.015 |
| 1392120_at   | AW526194  | Threonine synthase-like 1                                          | Thns1l           | 0.967   | 0.999 | 0.910  | 0.305 | 1.402   | 0.095 | 0.909  | 0.399 |
| 1372145_at   | BI289683  | threonyl-tRNA synthetase                                           | Tars             | 1.265   | 0.164 | 1.746  | 0.003 | 1.289   | 0.009 | 1.722  | 0.007 |
| 1373760_at   | BE349725  | threonyl-tRNA synthetase-like 1                                    | Tars1l           | 1.423   | 0.072 | 1.068  | 0.679 | 1.405   | 0.925 | 0.972  | 0.698 |
| 1368901_at   | BG666306  | thrombomodulin                                                     | Thbd             | 0.181   | 0.011 | 0.471  | 0.033 | 0.214   | 0.012 | 0.477  | 0.027 |
| 1375951_at   | AA818521  | thrombomodulin                                                     | Thbd             | 0.220   | 0.088 | 0.950  | 0.867 | 0.224   | 0.092 | 0.948  | 0.876 |
| 1388567_at   | BF282947  | THUMP domain containing 1                                          | Thumpd1          | 0.496   | 0.021 | 0.458  | 0.000 | 0.437   | 0.003 | 0.500  | 0.001 |
| 1376090_at   | AW252828  | THUMP domain containing 2                                          | Thumpd2          | 0.730   | 0.077 | 0.735  | 0.123 | 0.730   | 0.078 | 0.738  | 0.115 |
| 1398448_at   | BE108346  | Thymic stromal cotransporter (predicted)                           | Tscot_predicted  | 0.538   | 0.032 | 0.646  | 0.017 | 0.492   | 0.018 | 0.595  | 0.003 |
| 1368179_at   | NM_134465 | thymic stromal-derived lymphopoietin, receptor                     | Tslpr            | 1.796   | 0.009 | 1.344  | 0.443 | 1.710   | 0.066 | 0.967  | 0.986 |
| 1393044_at   | BF282370  | thymidylate kinase family LPS-inducible member (predicted)         | Tyki_predicted   | 110.965 | 0.000 | 26.603 | 0.004 | 276.242 | 0.001 | 52.564 | 0.001 |
| 1383424_at   | BI276216  | thymidylate kinase family LPS-inducible member (predicted)         | Tyki_predicted   | 93.299  | 0.006 | 43.348 | 0.001 | 156.711 | 0.005 | 78.594 | 0.000 |
| 1369499_at   | NM_019179 | thymidylate synthase                                               | Tyms             | 1.087   | 0.292 | 1.634  | 0.045 | 1.416   | 0.179 | 1.395  | 0.164 |
| 1368268_at   | NM_053729 | thymine-DNA glycosylase                                            | Tdg              | 1.171   | 0.492 | 1.463  | 0.102 | 0.814   | 0.583 | 1.428  | 0.132 |
| 1392387_at   | AI549050  | Thymocyte nuclear protein 1                                        | Thyn1            | 0.777   | 0.188 | 0.779  | 0.786 | 0.491   | 0.021 | 1.140  | 0.232 |
| 1383623_at   | BM383909  | thymocyte nuclear protein 1                                        | Thyn1            | 0.712   | 0.410 | 1.333  | 0.636 | 0.526   | 0.025 | 1.390  | 0.092 |
| 1393083_at   | AI102529  | Thymocyte selection-associated HMG box gene (predicted)            | Tox_predicted    | 1.077   | 0.474 | 0.899  | 0.182 | 1.391   | 0.045 | 0.720  | 0.083 |
| 1379824_at   | AI101139  | Thymocyte selection-associated HMG box gene (predicted)            | Tox_predicted    | 1.540   | 0.504 | 1.559  | 0.972 | 1.162   | 0.440 | 0.909  | 0.908 |
| 1383126_at   | AA998057  | Thymoma viral proto-oncogene 1                                     | Akt1             | 0.646   | 0.295 | 0.519  | 0.041 | 0.662   | 0.002 | 0.672  | 0.023 |
| 1375178_at   | BE111601  | Thymoma viral proto-oncogene 1                                     | Akt1             | 1.000   | 0.975 | 0.763  | 0.006 | 1.008   | 0.999 | 0.537  | 0.010 |
| 1368832_at   | NM_017093 | thymoma viral proto-oncogene 2                                     | Akt2             | 1.020   | 0.907 | 0.998  | 0.981 | 0.911   | 0.864 | 0.998  | 0.990 |



|              |           |                                                                        |                  |        |       |        |       |        |       |        |       |
|--------------|-----------|------------------------------------------------------------------------|------------------|--------|-------|--------|-------|--------|-------|--------|-------|
| 1388765_at   | AA946508  | Thymoma viral proto-oncogene 2                                         | Akt2             | 1.009  | 0.908 | 1.328  | 0.213 | 1.309  | 0.672 | 0.998  | 0.976 |
| 1387592_at   | NM_031575 | thymoma viral proto-oncogene 3                                         | Akt3             | 0.962  | 0.101 | 2.455  | 0.035 | 0.850  | 0.676 | 1.601  | 0.014 |
| 1368136_at   | NM_012887 | thymopoietin                                                           | Tmpo             | 1.346  | 0.687 | 1.173  | 0.427 | 0.742  | 0.033 | 0.936  | 0.053 |
| 1370442_at   | U25684    | thymosin beta-like protein 1                                           | Tmsb1l           | 0.816  | 0.146 | 0.644  | 0.048 | 0.867  | 0.064 | 0.775  | 0.074 |
| 1367655_at   | NM_021261 | thymosin, beta 10                                                      | Tmsb10           | 1.923  | 0.012 | 2.210  | 0.016 | 1.830  | 0.010 | 1.789  | 0.010 |
| 1387883_a_at | BG668902  | thymosin, beta 4                                                       | Tmsb4x           | 1.493  | 0.331 | 0.720  | 0.277 | 0.927  | 0.698 | 0.723  | 0.059 |
| 1369744_at   | AF221622  | thyroglobulin                                                          | Tg               | 1.501  | 0.183 | 0.716  | 0.076 | 2.376  | 0.037 | 0.641  | 0.038 |
| 1395928_at   | BE102495  | Thyroid hormone receptor alpha                                         | Thra             | 0.872  | 0.968 | 1.590  | 0.004 | 1.000  | 0.999 | 0.997  | 0.975 |
| 1386156_at   | AI639451  | thyroid hormone receptor associated protein 1 (predicted)              | Thrap1_predicted | 2.107  | 0.003 | 1.420  | 0.010 | 1.619  | 0.033 | 1.749  | 0.025 |
| 1379567_at   | AI105643  | thyroid hormone receptor associated protein 1 (predicted)              | Thrap1_predicted | 2.055  | 0.083 | 2.127  | 0.003 | 1.487  | 0.245 | 1.587  | 0.110 |
| 1385091_at   | AW530801  | thyroid hormone receptor associated protein 1 (predicted)              | Thrap1_predicted | 1.019  | 0.864 | 1.343  | 0.390 | 0.970  | 0.266 | 1.279  | 0.055 |
| 1367525_at   | AI179833  | thyroid hormone receptor associated protein 3                          | Thrap3           | 0.716  | 0.003 | 0.650  | 0.019 | 0.854  | 0.022 | 0.783  | 0.063 |
| 1398967_at   | AI410050  | thyroid hormone receptor associated protein 4                          | Thrap4           | 0.901  | 0.047 | 1.045  | 0.048 | 1.128  | 0.174 | 0.995  | 0.972 |
| 1399078_at   | BG380479  | thyroid hormone receptor associated protein 5 (predicted)              | Thrap5_predicted | 1.003  | 0.545 | 1.535  | 0.093 | 1.173  | 0.908 | 1.164  | 0.196 |
| 1377596_a_at | AI008698  | thyroid hormone receptor associated protein 6 (predicted)              | Thrap6_predicted | 0.881  | 0.151 | 0.949  | 0.676 | 1.005  | 0.469 | 0.947  | 0.456 |
| 1386963_at   | NM_053920 | thyroid hormone receptor interactor 10                                 | Trip10           | 1.565  | 0.796 | 4.393  | 0.026 | 1.629  | 0.550 | 3.913  | 0.026 |
| 1374795_at   | AA891859  | Thyroid hormone receptor interactor 12                                 | Trip12           | 0.937  | 0.495 | 0.336  | 0.007 | 0.895  | 0.396 | 0.395  | 0.012 |
| 1374490_at   | AI177845  | thyroid hormone receptor interactor 12                                 | Trip12           | 0.992  | 0.598 | 0.470  | 0.002 | 1.059  | 0.445 | 0.568  | 0.035 |
| 1376984_at   | AW915048  | Thyroid hormone receptor interactor 12                                 | Trip12           | 1.178  | 0.610 | 0.460  | 0.002 | 1.078  | 0.638 | 0.613  | 0.004 |
| 1388873_at   | AA891883  | thyroid hormone receptor interactor 12                                 | Trip12           | 1.163  | 0.648 | 1.310  | 0.005 | 1.045  | 0.727 | 1.114  | 0.641 |
| 1382288_at   | AI172553  | thyroid hormone receptor interactor 4 (predicted)                      | Trip4_predicted  | 0.687  | 0.593 | 1.725  | 0.011 | 0.646  | 0.081 | 1.002  | 0.858 |
| 1371400_at   | AI169092  | thyroid hormone responsive protein                                     | Thrsp            | 1.050  | 0.889 | 0.985  | 0.502 | 0.998  | 0.893 | 1.001  | 0.649 |
| 1370302_at   | AF348365  | thyroid hormone-response protein-1                                     | AF348365         | 1.001  | 0.852 | 0.860  | 0.070 | 0.716  | 0.021 | 0.690  | 0.077 |
| 1368912_at   | M12138    | thyrotropin releasing hormone                                          | Trh              | 0.496  | 0.138 | 0.293  | 0.353 | 0.512  | 0.073 | 0.077  | 0.041 |
| 1388476_at   | AI101391  | Tial1 cytotoxic granule-associated RNA binding protein-like 1 (mapped) | Tial1_mapped     | 1.146  | 0.486 | 1.387  | 0.001 | 1.028  | 0.501 | 1.317  | 0.005 |
| 1397797_at   | BE103164  | Tigger transposable element derived 3 (predicted)                      | Tigd3_predicted  | 1.051  | 0.763 | 0.961  | 0.818 | 5.729  | 0.098 | 0.999  | 0.884 |
| 1375865_at   | BF408844  | tight junction associated protein 1 (predicted)                        | Tjap1_predicted  | 1.654  | 0.035 | 1.517  | 0.128 | 1.965  | 0.034 | 1.831  | 0.006 |
| 1372473_at   | AW434048  | tight junction protein 1 (predicted)                                   | Tjp1_predicted   | 2.417  | 0.005 | 1.633  | 0.004 | 2.584  | 0.000 | 2.185  | 0.012 |
| 1370940_at   | BG378746  | tight junction protein 2                                               | Tjp2             | 3.919  | 0.018 | 2.947  | 0.013 | 2.037  | 0.052 | 2.462  | 0.026 |
| 1378567_at   | BI295961  | tight junction protein 3 (predicted)                                   | Tjp3_predicted   | 1.149  | 0.560 | 2.678  | 0.082 | 1.025  | 0.489 | 1.334  | 0.137 |
| 1368522_at   | NM_031340 | timeless homolog (Drosophila)                                          | Timeless         | 1.004  | 0.637 | 1.003  | 0.875 | 1.002  | 0.991 | 0.994  | 0.935 |
| 1368323_at   | NM_017200 | tissue factor pathway inhibitor                                        | Tfpi             | 0.986  | 0.593 | 0.102  | 0.001 | 0.999  | 0.817 | 0.136  | 0.002 |
| 1377340_at   | AI179507  | tissue factor pathway inhibitor 2                                      | Tfpi2            | 0.997  | 0.991 | 0.718  | 0.035 | 1.001  | 0.949 | 1.037  | 0.244 |
| 1367712_at   | NM_053819 | tissue inhibitor of metalloproteinase 1                                | Timp1            | 15.285 | 0.001 | 20.152 | 0.000 | 18.594 | 0.000 | 19.444 | 0.000 |
| 1398953_at   | BM386183  | tissue specific transplantation antigen P35B (predicted)               | Tsta3_predicted  | 0.617  | 0.007 | 0.942  | 0.406 | 0.398  | 0.003 | 0.802  | 0.338 |
| 1391559_at   | AW525904  | TLC domain containing 1                                                | Tlcd1            | 1.119  | 0.510 | 2.421  | 0.011 | 1.055  | 0.803 | 2.292  | 0.001 |
| 1385838_a_at | BF287928  | TM2 domain containing 1 (predicted)                                    | Tm2d1_predicted  | 0.682  | 0.365 | 0.463  | 0.011 | 0.796  | 0.502 | 0.660  | 0.014 |
| 1385839_x_at | BF287928  | TM2 domain containing 1 (predicted)                                    | Tm2d1_predicted  | 0.720  | 0.442 | 0.460  | 0.012 | 0.747  | 0.412 | 0.626  | 0.004 |
| 1367550_a_at | BI287742  | TM2 domain containing 1 (predicted)                                    | Tm2d1_predicted  | 0.722  | 0.526 | 0.475  | 0.011 | 0.766  | 0.436 | 0.633  | 0.006 |
| 1398984_at   | AA818129  | TM2 domain containing 2                                                | Tm2d2            | 0.300  | 0.077 | 0.520  | 0.000 | 0.482  | 0.001 | 0.655  | 0.002 |
| 1373277_at   | BG373457  | TM2 domain containing 3 (predicted)                                    | Tm2d3_predicted  | 0.532  | 0.292 | 1.253  | 0.209 | 0.704  | 0.440 | 1.155  | 0.660 |
| 1381524_at   | BF397008  | TM2 domain containing 3 (predicted)                                    | Tm2d3_predicted  | 1.183  | 0.723 | 0.851  | 0.918 | 0.735  | 0.667 | 1.070  | 0.986 |
| 1374675_at   | BG374992  | TMEM9 domain family, member B (predicted)                              | Tmem9b_predicted | 0.999  | 0.219 | 0.973  | 0.397 | 0.536  | 0.063 | 0.928  | 0.895 |
| 1374058_at   | BM384945  | TMEM9 domain family, member B (predicted)                              | Tmem9b_predicted | 0.793  | 0.279 | 0.838  | 0.052 | 0.761  | 0.217 | 0.837  | 0.027 |
| 1371551_at   | BM383323  | Tnf receptor associated factor 4 (predicted)                           | Traf4_predicted  | 1.470  | 0.035 | 1.786  | 0.067 | 1.403  | 0.002 | 1.725  | 0.018 |
| 1388769_at   | BI287266  | Tnf receptor-associated factor 7 (predicted)                           | Traf7_predicted  | 1.012  | 0.823 | 1.143  | 0.284 | 1.160  | 0.161 | 1.156  | 0.167 |
| 1374467_at   | BM389034  | TNF receptor-associated protein 1                                      | Trap1            | 0.291  | 0.014 | 0.497  | 0.175 | 0.347  | 0.003 | 0.685  | 0.521 |
| 1388492_at   | AW919111  | TNFAIP3 interacting protein 1 (predicted)                              | Tnip1_predicted  | 28.231 | 0.000 | 5.140  | 0.000 | 35.164 | 0.000 | 6.443  | 0.000 |
| 1383655_at   | BF545192  | TNFAIP3 interacting protein 2                                          | Tnip2            | 3.215  | 0.017 | 14.278 | 0.002 | 1.952  | 0.051 | 10.646 | 0.002 |
| 1390434_at   | BM386846  | TNFRSF1A-associated via death domain                                   | Tradd            | 0.887  | 0.487 | 2.030  | 0.073 | 1.096  | 0.272 | 1.907  | 0.049 |
| 1378572_at   | BF408962  | toll interacting protein (predicted)                                   | Tollip_predicted | 3.268  | 0.077 | 6.994  | 0.007 | 1.950  | 0.006 | 1.899  | 0.107 |
| 1399052_at   | AA957069  | Toll interacting protein (predicted)                                   | Tollip_predicted | 1.370  | 0.152 | 1.280  | 0.007 | 0.920  | 0.927 | 1.034  | 0.981 |
| 1380808_at   | BE112982  | Toll interacting protein (predicted)                                   | Tollip_predicted | 1.378  | 0.480 | 1.305  | 0.099 | 0.860  | 0.827 | 0.998  | 0.388 |
| 1389944_at   | AI014155  | Toll-like receptor adaptor molecule 2 (predicted)                      | Ticam2_predicted | 0.605  | 0.148 | 1.254  | 0.269 | 1.047  | 0.942 | 0.713  | 0.328 |
| 1373862_at   | AI009673  | Toll-like receptor adaptor molecule 2 (predicted)                      | Ticam2_predicted | 0.772  | 0.192 | 0.975  | 0.421 | 0.801  | 0.098 | 0.924  | 0.321 |
| 1386477_at   | AI170046  | Toll-like receptor adaptor molecule 2 (predicted)                      | Ticam2_predicted | 0.642  | 0.813 | 1.028  | 0.950 | 0.697  | 0.339 | 0.938  | 0.743 |
| 1369990_at   | NM_022183 | topoisomerase (DNA) 2 alpha                                            | Top2a            | 0.411  | 0.196 | 1.177  | 0.052 | 0.341  | 0.004 | 1.102  | 0.297 |
| 1388650_at   | BM385445  | topoisomerase (DNA) 2 alpha                                            | Top2a            | 0.999  | 0.745 | 0.062  | 0.002 | 1.088  | 0.185 | 0.061  | 0.000 |
| 1399046_at   | BE116507  | topoisomerase (DNA) I                                                  | Top1             | 1.243  | 0.020 | 0.826  | 0.054 | 1.159  | 0.067 | 0.753  | 0.094 |
| 1369421_at   | NM_022615 | topoisomerase (DNA) I                                                  | Top1             | 0.967  | 0.858 | 0.977  | 0.832 | 0.980  | 0.404 | 0.956  | 0.996 |
| 1373553_at   | AI233765  | topoisomerase (DNA) III beta (predicted)                               | Top3b_predicted  | 0.764  | 0.531 | 1.231  | 0.263 | 1.019  | 0.198 | 0.920  | 0.527 |

|              |           |                                                                                                 |                    |         |       |        |       |         |       |        |       |
|--------------|-----------|-------------------------------------------------------------------------------------------------|--------------------|---------|-------|--------|-------|---------|-------|--------|-------|
| 1392610_at   | AI176588  | topoisomerase I binding, arginine/serine-rich (predicted)                                       | Topors_predicted   | 1.083   | 0.236 | 1.126  | 0.630 | 1.007   | 0.904 | 1.008  | 0.949 |
| 1388024_s_at | U20286    | torsin A interacting protein 1                                                                  | Tor1aip1           | 2.702   | 0.027 | 1.320  | 0.299 | 2.991   | 0.001 | 1.672  | 0.306 |
| 1387917_at   | U19614    | torsin A interacting protein 1                                                                  | Tor1aip1           | 2.164   | 0.045 | 1.630  | 0.027 | 2.534   | 0.000 | 1.269  | 0.034 |
| 1375969_at   | BI296555  | torsin A interacting protein 2                                                                  | Tor1aip2           | 1.930   | 0.018 | 3.020  | 0.003 | 1.890   | 0.042 | 2.285  | 0.066 |
| 1381980_at   | BI278862  | Torsin A interacting protein 2                                                                  | Tor1aip2           | 1.492   | 0.034 | 1.037  | 0.238 | 2.038   | 0.013 | 0.932  | 0.462 |
| 1374798_at   | AA924151  | Torsin A interacting protein 2                                                                  | Tor1aip2           | 0.541   | 0.094 | 0.417  | 0.004 | 0.733   | 0.052 | 0.609  | 0.003 |
| 1392656_at   | AI073268  | Torsin A interacting protein 2                                                                  | Tor1aip2           | 1.010   | 0.964 | 1.735  | 0.114 | 1.005   | 0.970 | 1.004  | 0.974 |
| 1373406_at   | BM384991  | torsin family 1, member B                                                                       | Tor1b              | 0.580   | 0.044 | 0.492  | 0.001 | 1.276   | 0.062 | 0.764  | 0.016 |
| 1382984_at   | AI073272  | torsin family 1, member B                                                                       | Tor1b              | 0.616   | 0.486 | 0.687  | 0.629 | 0.693   | 0.199 | 0.797  | 0.667 |
| 1373662_at   | AI178830  | torsin family 2, member A                                                                       | Tor2a              | 0.692   | 0.160 | 1.212  | 0.414 | 0.828   | 0.552 | 1.058  | 0.458 |
| 1384318_at   | BE100696  | Torsin family 2, member A                                                                       | Tor2a              | 1.266   | 0.818 | 0.281  | 0.006 | 1.842   | 0.340 | 0.451  | 0.098 |
| 1372868_at   | BF284295  | torsin family 3, member A                                                                       | Tor3a              | 1.737   | 0.001 | 2.151  | 0.001 | 2.670   | 0.000 | 2.589  | 0.000 |
| 1382114_at   | BG379991  | tousled-like kinase 1 (predicted)                                                               | Tlk1_predicted     | 1.505   | 0.010 | 1.125  | 0.075 | 1.356   | 0.001 | 1.069  | 0.890 |
| 1383827_at   | AI059119  | tousled-like kinase 1 (predicted)                                                               | Tlk1_predicted     | 1.603   | 0.012 | 1.238  | 0.108 | 1.551   | 0.041 | 1.424  | 0.012 |
| 1399088_at   | AA819648  | tousled-like kinase 2 (Arabidopsis) (predicted)                                                 | Tlk2_predicted     | 2.047   | 0.101 | 1.536  | 0.058 | 1.694   | 0.044 | 1.644  | 0.009 |
| 1379488_at   | BI274525  | TP53 regulating kinase (predicted)                                                              | Trp53rk_predicted  | 0.509   | 0.110 | 1.274  | 0.251 | 0.515   | 0.105 | 1.004  | 0.949 |
| 1376007_at   | AI411772  | TP53 binding protein                                                                            | Tprkb              | 0.726   | 0.180 | 0.356  | 0.033 | 0.633   | 0.377 | 0.773  | 0.055 |
| 1390972_at   | BI281729  | TP53 binding protein                                                                            | Tprkb              | 0.671   | 0.230 | 0.992  | 0.162 | 0.642   | 0.212 | 0.833  | 0.086 |
| 1373392_at   | AW523924  | TPA regulated locus                                                                             | Tparl              | 0.987   | 0.964 | 0.648  | 0.013 | 0.831   | 0.606 | 0.755  | 0.060 |
| 1371122_at   | AW140505  | TRAF family member-associated Nf-kappa B activator /// hypothetical gene supported by NM_145788 | Tank /// LOC497768 | 1.125   | 0.135 | 1.744  | 0.990 | 0.997   | 0.991 | 1.005  | 0.976 |
| 1382311_at   | BM384466  | TRAF2 binding protein                                                                           | LOC310877          | 39.747  | 0.003 | 7.045  | 0.001 | 78.651  | 0.001 | 15.497 | 0.002 |
| 1391787_at   | AI059620  | TRAF3 interacting protein 3                                                                     | Traf3ip3           | 0.717   | 0.019 | 0.965  | 0.607 | 0.698   | 0.120 | 0.681  | 0.119 |
| 1372252_at   | BE112892  | trafficking protein particle complex 1                                                          | Trappc1            | 0.518   | 0.004 | 0.475  | 0.000 | 0.523   | 0.008 | 0.497  | 0.015 |
| 1372284_at   | AI104319  | trafficking protein particle complex 3                                                          | Trappc3            | 1.022   | 0.945 | 0.864  | 0.358 | 0.763   | 0.483 | 0.962  | 0.736 |
| 1373907_at   | BI288890  | trafficking protein particle complex 4                                                          | Trappc4            | 1.024   | 0.937 | 1.416  | 0.094 | 0.744   | 0.229 | 1.496  | 0.018 |
| 1372283_at   | AA800622  | trafficking protein particle complex 6B (predicted)                                             | Trappc6b_predicted | 1.103   | 0.697 | 1.303  | 0.185 | 0.969   | 0.842 | 1.234  | 0.008 |
| 1372092_at   | BI278968  | trafficking protein, kinesin binding 2                                                          | Trak2              | 0.443   | 0.080 | 0.225  | 0.000 | 0.366   | 0.001 | 0.336  | 0.000 |
| 1369940_at   | NM_031811 | transaldolase 1                                                                                 | Taldo1             | 0.819   | 0.113 | 2.126  | 0.001 | 0.680   | 0.025 | 1.374  | 0.028 |
| 1367765_at   | NM_022534 | transcobalamin 2                                                                                | Tcn2               | 0.684   | 0.668 | 0.553  | 0.000 | 0.420   | 0.020 | 0.535  | 0.008 |
| 1393351_at   | BE109501  | Transcribed locus                                                                               | ---                | 10.542  | 0.000 | 2.572  | 0.003 | 9.782   | 0.000 | 1.852  | 0.225 |
| 1380129_at   | AA818937  | Transcribed locus                                                                               | ---                | 8.755   | 0.000 | 10.515 | 0.002 | 10.502  | 0.000 | 11.448 | 0.002 |
| 1393494_at   | AA866419  | Transcribed locus                                                                               | ---                | 10.652  | 0.000 | 2.217  | 0.004 | 9.999   | 0.000 | 1.801  | 0.051 |
| 1383757_at   | AI044802  | Transcribed locus                                                                               | ---                | 53.430  | 0.000 | 21.195 | 0.000 | 37.958  | 0.000 | 37.808 | 0.002 |
| 1382933_at   | BE102157  | Transcribed locus                                                                               | ---                | 10.837  | 0.000 | 4.571  | 0.001 | 1.655   | 0.513 | 1.397  | 0.081 |
| 1379647_at   | BI295140  | Transcribed locus                                                                               | ---                | 0.232   | 0.000 | 0.223  | 0.000 | 0.276   | 0.019 | 0.254  | 0.023 |
| 1379477_at   | AI555261  | Transcribed locus                                                                               | ---                | 4.212   | 0.000 | 1.738  | 0.029 | 3.304   | 0.000 | 2.775  | 0.045 |
| 1383939_at   | BG378849  | Transcribed locus                                                                               | ---                | 15.308  | 0.000 | 4.169  | 0.004 | 20.279  | 0.000 | 9.791  | 0.001 |
| 1371627_at   | BI277433  | Transcribed locus                                                                               | ---                | 0.352   | 0.000 | 0.210  | 0.002 | 0.337   | 0.001 | 0.119  | 0.013 |
| 1373488_at   | BF289154  | Transcribed locus                                                                               | ---                | 4.087   | 0.000 | 0.801  | 0.040 | 5.003   | 0.000 | 1.288  | 0.210 |
| 1377826_at   | AI176721  | Transcribed locus                                                                               | ---                | 17.836  | 0.000 | 3.325  | 0.003 | 18.228  | 0.000 | 5.169  | 0.011 |
| 1391125_at   | AI639331  | Transcribed locus                                                                               | ---                | 3.046   | 0.000 | 2.336  | 0.014 | 3.665   | 0.000 | 2.273  | 0.002 |
| 1374075_at   | AI175533  | Transcribed locus                                                                               | ---                | 0.600   | 0.000 | 0.430  | 0.000 | 0.818   | 0.103 | 0.612  | 0.010 |
| 1377442_at   | BF409997  | Transcribed locus                                                                               | ---                | 0.169   | 0.000 | 0.209  | 0.022 | 0.233   | 0.000 | 0.419  | 0.030 |
| 1385380_at   | AI044983  | Transcribed locus                                                                               | ---                | 126.467 | 0.000 | 29.024 | 0.000 | 292.902 | 0.000 | 41.156 | 0.000 |
| 1389774_at   | AI008371  | Transcribed locus                                                                               | ---                | 0.423   | 0.000 | 0.264  | 0.000 | 0.679   | 0.060 | 0.276  | 0.020 |
| 1377345_at   | AI502211  | Transcribed locus                                                                               | ---                | 1.839   | 0.000 | 1.116  | 0.025 | 2.096   | 0.000 | 1.233  | 0.003 |
| 1388701_at   | AI555336  | Transcribed locus                                                                               | ---                | 7.229   | 0.000 | 0.983  | 0.751 | 7.515   | 0.002 | 0.982  | 0.747 |
| 1374823_at   | BI291651  | Transcribed locus                                                                               | ---                | 0.531   | 0.000 | 0.391  | 0.001 | 0.785   | 0.193 | 0.463  | 0.068 |
| 1374685_at   | BE117446  | Transcribed locus                                                                               | ---                | 0.540   | 0.000 | 0.411  | 0.001 | 0.644   | 0.003 | 0.503  | 0.016 |
| 1388759_at   | BM389875  | Transcribed locus                                                                               | ---                | 3.833   | 0.000 | 2.517  | 0.000 | 5.374   | 0.002 | 3.243  | 0.000 |
| 1384470_at   | BE114218  | Transcribed locus                                                                               | ---                | 0.362   | 0.000 | 0.382  | 0.005 | 0.176   | 0.015 | 0.277  | 0.020 |
| 1394456_at   | AW525722  | Transcribed locus                                                                               | ---                | 0.515   | 0.000 | 0.869  | 0.022 | 0.524   | 0.011 | 0.996  | 0.085 |
| 1380712_at   | AI406475  | Transcribed locus                                                                               | ---                | 0.307   | 0.000 | 0.143  | 0.000 | 0.395   | 0.031 | 0.064  | 0.015 |
| 1382171_at   | AI454310  | Transcribed locus                                                                               | ---                | 1.356   | 0.000 | 2.524  | 0.025 | 0.872   | 0.313 | 2.429  | 0.024 |
| 1379431_at   | AW918368  | Transcribed locus                                                                               | ---                | 0.602   | 0.000 | 0.333  | 0.001 | 0.799   | 0.004 | 0.335  | 0.019 |
| 1385381_at   | AA996491  | Transcribed locus                                                                               | ---                | 0.222   | 0.000 | 0.443  | 0.009 | 0.321   | 0.010 | 0.369  | 0.124 |
| 1384019_a_at | BM383449  | Transcribed locus                                                                               | ---                | 1.591   | 0.000 | 1.356  | 0.004 | 1.791   | 0.003 | 1.607  | 0.024 |
| 1385926_at   | BF550565  | Transcribed locus                                                                               | ---                | 14.358  | 0.000 | 4.903  | 0.003 | 14.889  | 0.001 | 6.938  | 0.001 |
| 1374622_at   | BE107309  | Transcribed locus                                                                               | ---                | 11.960  | 0.001 | 2.002  | 0.047 | 11.295  | 0.004 | 2.098  | 0.006 |
| 1389206_at   | BE116867  | Transcribed locus                                                                               | ---                | 0.368   | 0.001 | 0.332  | 0.000 | 0.304   | 0.011 | 0.516  | 0.023 |
| 1376673_at   | BM391853  | Transcribed locus                                                                               | ---                | 4.409   | 0.001 | 2.216  | 0.002 | 4.435   | 0.002 | 2.319  | 0.004 |

|              |          |                   |     |        |       |        |       |        |       |        |       |
|--------------|----------|-------------------|-----|--------|-------|--------|-------|--------|-------|--------|-------|
| 1379073_at   | AA859663 | Transcribed locus | --- | 0.346  | 0.001 | 0.345  | 0.015 | 0.729  | 0.187 | 0.584  | 0.151 |
| 1390659_at   | BI302830 | Transcribed locus | --- | 16.855 | 0.001 | 13.404 | 0.001 | 14.540 | 0.000 | 9.852  | 0.001 |
| 1371821_at   | BM391330 | Transcribed locus | --- | 2.217  | 0.001 | 1.578  | 0.048 | 2.078  | 0.015 | 1.414  | 0.036 |
| 1385925_at   | AA963975 | Transcribed locus | --- | 22.343 | 0.001 | 5.828  | 0.001 | 18.753 | 0.001 | 7.430  | 0.001 |
| 1383189_at   | AA818143 | Transcribed locus | --- | 13.898 | 0.001 | 1.893  | 0.158 | 34.959 | 0.001 | 8.590  | 0.003 |
| 1381145_at   | BE112469 | Transcribed locus | --- | 4.079  | 0.001 | 1.465  | 0.695 | 2.817  | 0.008 | 0.861  | 0.724 |
| 1395081_at   | BI290843 | Transcribed locus | --- | 2.687  | 0.001 | 0.447  | 0.051 | 3.255  | 0.006 | 0.848  | 0.531 |
| 1394786_at   | AW526631 | Transcribed locus | --- | 0.486  | 0.001 | 0.127  | 0.001 | 0.705  | 0.061 | 0.258  | 0.002 |
| 1376637_at   | AI102401 | Transcribed locus | --- | 0.363  | 0.001 | 0.222  | 0.000 | 0.299  | 0.001 | 0.228  | 0.038 |
| 1397558_at   | AW527159 | Transcribed locus | --- | 2.309  | 0.001 | 0.693  | 0.314 | 1.989  | 0.045 | 0.899  | 0.570 |
| 1388573_at   | BF288140 | Transcribed locus | --- | 1.791  | 0.001 | 0.685  | 0.233 | 1.090  | 0.159 | 1.002  | 0.994 |
| 1383348_at   | BF545309 | Transcribed locus | --- | 2.715  | 0.001 | 2.735  | 0.001 | 2.438  | 0.002 | 2.832  | 0.004 |
| 1373055_at   | AI407547 | Transcribed locus | --- | 0.321  | 0.001 | 1.363  | 0.909 | 0.344  | 0.001 | 1.004  | 0.211 |
| 1393134_at   | BG375377 | Transcribed locus | --- | 0.433  | 0.001 | 0.501  | 0.032 | 0.642  | 0.010 | 0.781  | 0.318 |
| 1395480_at   | BI303370 | Transcribed locus | --- | 1.474  | 0.001 | 0.459  | 0.295 | 1.806  | 0.020 | 0.872  | 0.281 |
| 1382931_at   | AA924607 | Transcribed locus | --- | 2.899  | 0.001 | 1.622  | 0.026 | 2.138  | 0.014 | 1.070  | 0.549 |
| 1390809_at   | AI599392 | Transcribed locus | --- | 3.286  | 0.001 | 1.745  | 0.047 | 2.763  | 0.011 | 2.168  | 0.160 |
| 1392969_at   | BI282309 | Transcribed locus | --- | 0.432  | 0.001 | 0.183  | 0.002 | 0.171  | 0.022 | 0.192  | 0.084 |
| 1374429_at   | AI598401 | Transcribed locus | --- | 7.484  | 0.001 | 3.765  | 0.011 | 8.377  | 0.003 | 3.736  | 0.015 |
| 1389213_at   | AI408955 | Transcribed locus | --- | 2.078  | 0.001 | 0.485  | 0.113 | 2.464  | 0.000 | 0.726  | 0.978 |
| 1381081_at   | AW523873 | Transcribed locus | --- | 2.332  | 0.001 | 1.016  | 0.834 | 2.461  | 0.007 | 1.207  | 0.007 |
| 1374531_at   | AA926305 | Transcribed locus | --- | 1.542  | 0.001 | 0.835  | 0.094 | 1.225  | 0.011 | 0.794  | 0.020 |
| 1398412_at   | BF402250 | Transcribed locus | --- | 0.126  | 0.001 | 0.447  | 0.010 | 0.139  | 0.003 | 0.385  | 0.001 |
| 1388465_at   | AA891733 | Transcribed locus | --- | 0.491  | 0.001 | 0.642  | 0.008 | 0.415  | 0.007 | 0.649  | 0.007 |
| 1393478_at   | AI029492 | Transcribed locus | --- | 0.475  | 0.001 | 0.312  | 0.000 | 0.457  | 0.010 | 0.464  | 0.010 |
| 1390207_at   | BM390283 | Transcribed locus | --- | 0.521  | 0.001 | 0.379  | 0.045 | 0.423  | 0.054 | 0.527  | 0.000 |
| 1385016_at   | AI136882 | Transcribed locus | --- | 0.203  | 0.001 | 0.090  | 0.001 | 0.222  | 0.001 | 0.216  | 0.023 |
| 1379113_at   | BE119226 | Transcribed locus | --- | 0.550  | 0.001 | 0.828  | 0.311 | 0.405  | 0.002 | 0.780  | 0.093 |
| 1386022_at   | AW921706 | Transcribed locus | --- | 0.664  | 0.001 | 0.555  | 0.066 | 0.606  | 0.050 | 0.633  | 0.051 |
| 1390804_at   | AI176434 | Transcribed locus | --- | 1.724  | 0.001 | 0.850  | 0.029 | 1.873  | 0.004 | 1.037  | 0.763 |
| 1378783_at   | AI144739 | Transcribed locus | --- | 11.302 | 0.001 | 3.398  | 0.213 | 7.604  | 0.006 | 1.554  | 0.583 |
| 1376319_at   | BM390322 | Transcribed locus | --- | 2.031  | 0.002 | 3.465  | 0.001 | 1.698  | 0.015 | 2.907  | 0.003 |
| 1373923_at   | BF283756 | Transcribed locus | --- | 10.555 | 0.002 | 1.619  | 0.017 | 11.952 | 0.002 | 0.932  | 0.829 |
| 1372381_at   | BM383457 | Transcribed locus | --- | 0.195  | 0.002 | 0.140  | 0.000 | 0.259  | 0.006 | 0.184  | 0.013 |
| 1398440_at   | BI292166 | Transcribed locus | --- | 0.382  | 0.002 | 0.236  | 0.003 | 1.014  | 0.275 | 0.487  | 0.012 |
| 1381043_at   | AI639256 | Transcribed locus | --- | 0.223  | 0.002 | 0.490  | 0.119 | 1.084  | 0.853 | 1.043  | 0.975 |
| 1383938_at   | BI286738 | Transcribed locus | --- | 2.811  | 0.002 | 0.843  | 0.124 | 5.257  | 0.000 | 1.137  | 0.237 |
| 1390461_at   | AI071102 | Transcribed locus | --- | 0.702  | 0.002 | 1.057  | 0.093 | 0.452  | 0.009 | 0.779  | 0.447 |
| 1392518_at   | AI577870 | Transcribed locus | --- | 1.876  | 0.002 | 1.818  | 0.013 | 3.355  | 0.000 | 1.513  | 0.127 |
| 1383503_at   | AI102821 | Transcribed locus | --- | 0.617  | 0.002 | 0.715  | 0.030 | 0.540  | 0.043 | 0.840  | 0.574 |
| 1391106_at   | BM385061 | Transcribed locus | --- | 57.037 | 0.002 | 28.311 | 0.000 | 87.755 | 0.001 | 86.156 | 0.002 |
| 1385138_at   | BF401469 | Transcribed locus | --- | 0.231  | 0.002 | 0.610  | 0.015 | 0.326  | 0.007 | 0.631  | 0.011 |
| 1377994_at   | AI501237 | Transcribed locus | --- | 6.140  | 0.002 | 3.568  | 0.019 | 6.436  | 0.002 | 1.969  | 0.093 |
| 1382289_at   | BI291954 | Transcribed locus | --- | 0.569  | 0.002 | 0.197  | 0.000 | 0.960  | 0.733 | 0.240  | 0.018 |
| 1367540_at   | AI044872 | Transcribed locus | --- | 5.408  | 0.002 | 3.064  | 0.000 | 6.238  | 0.004 | 2.563  | 0.007 |
| 1395557_at   | BF565718 | Transcribed locus | --- | 4.434  | 0.002 | 4.128  | 0.001 | 4.423  | 0.012 | 3.224  | 0.010 |
| 1393728_at   | AA964541 | Transcribed locus | --- | 71.436 | 0.002 | 27.395 | 0.008 | 33.004 | 0.001 | 24.395 | 0.006 |
| 1390142_at   | BE111888 | Transcribed locus | --- | 2.461  | 0.002 | 0.890  | 0.294 | 3.025  | 0.001 | 1.216  | 0.752 |
| 1396770_at   | BE099410 | Transcribed locus | --- | 3.428  | 0.002 | 1.428  | 0.347 | 1.878  | 0.017 | 0.681  | 0.816 |
| 1391463_at   | AI575264 | Transcribed locus | --- | 8.933  | 0.002 | 5.004  | 0.000 | 14.629 | 0.000 | 14.723 | 0.006 |
| 1376520_at   | BE117616 | Transcribed locus | --- | 1.519  | 0.002 | 0.249  | 0.004 | 1.765  | 0.021 | 0.478  | 0.042 |
| 1372633_at   | AI178531 | Transcribed locus | --- | 0.466  | 0.002 | 0.276  | 0.002 | 0.387  | 0.001 | 0.447  | 0.007 |
| 1392600_a_at | AI176989 | Transcribed locus | --- | 13.173 | 0.002 | 3.194  | 0.002 | 6.648  | 0.015 | 2.356  | 0.009 |
| 1397748_at   | AW521583 | Transcribed locus | --- | 0.512  | 0.002 | 0.484  | 0.001 | 0.710  | 0.271 | 0.708  | 0.083 |
| 1380137_at   | BF406176 | Transcribed locus | --- | 0.512  | 0.002 | 0.179  | 0.015 | 0.324  | 0.039 | 0.380  | 0.033 |
| 1394184_at   | AI177746 | Transcribed locus | --- | 1.297  | 0.002 | 0.896  | 0.975 | 3.079  | 0.046 | 1.124  | 0.074 |
| 1371707_at   | AI235431 | Transcribed locus | --- | 0.735  | 0.002 | 0.758  | 0.099 | 0.898  | 0.836 | 0.968  | 0.304 |
| 1373137_at   | BI284360 | Transcribed locus | --- | 0.604  | 0.002 | 0.835  | 0.181 | 0.489  | 0.009 | 0.778  | 0.036 |
| 1380119_at   | AA996432 | Transcribed locus | --- | 5.332  | 0.002 | 2.967  | 0.018 | 12.371 | 0.000 | 4.569  | 0.006 |
| 1383383_at   | BE115992 | Transcribed locus | --- | 1.379  | 0.002 | 1.567  | 0.001 | 1.395  | 0.008 | 1.489  | 0.019 |
| 1374542_at   | AI409904 | Transcribed locus | --- | 0.314  | 0.002 | 1.978  | 0.818 | 0.356  | 0.003 | 1.770  | 0.990 |

|              |          |                   |     |        |       |        |       |         |       |        |       |
|--------------|----------|-------------------|-----|--------|-------|--------|-------|---------|-------|--------|-------|
| 1398561_at   | BI302791 | Transcribed locus | --- | 6.568  | 0.002 | 1.366  | 0.016 | 9.396   | 0.000 | 1.981  | 0.016 |
| 1394399_at   | AW523958 | Transcribed locus | --- | 3.120  | 0.002 | 1.791  | 0.025 | 1.934   | 0.009 | 1.049  | 0.901 |
| 1376672_at   | AW533083 | Transcribed locus | --- | 2.718  | 0.002 | 0.648  | 0.020 | 3.457   | 0.003 | 0.815  | 0.123 |
| 1388447_at   | AA800701 | Transcribed locus | --- | 0.334  | 0.002 | 0.357  | 0.009 | 0.250   | 0.004 | 0.377  | 0.001 |
| 1398620_at   | BF397903 | Transcribed locus | --- | 7.046  | 0.002 | 2.397  | 0.045 | 11.908  | 0.001 | 3.476  | 0.026 |
| 1383511_at   | BF409024 | Transcribed locus | --- | 0.361  | 0.002 | 0.720  | 0.004 | 0.464   | 0.077 | 0.956  | 0.861 |
| 1389319_at   | AA800719 | Transcribed locus | --- | 0.546  | 0.002 | 0.709  | 0.007 | 0.575   | 0.010 | 0.720  | 0.025 |
| 1383486_at   | AA926109 | Transcribed locus | --- | 2.972  | 0.003 | 1.128  | 0.633 | 2.891   | 0.016 | 1.384  | 0.075 |
| 1374463_at   | AI172068 | Transcribed locus | --- | 1.331  | 0.003 | 1.874  | 0.001 | 1.075   | 0.440 | 1.569  | 0.026 |
| 1374337_at   | AI408954 | Transcribed locus | --- | 43.544 | 0.003 | 22.632 | 0.000 | 114.111 | 0.001 | 49.242 | 0.000 |
| 1376869_at   | BE108193 | Transcribed locus | --- | 2.209  | 0.003 | 0.790  | 0.045 | 2.083   | 0.016 | 1.125  | 0.065 |
| 1373164_at   | AI012590 | Transcribed locus | --- | 3.011  | 0.003 | 2.361  | 0.044 | 1.180   | 0.957 | 2.026  | 0.055 |
| 1374627_at   | BF283727 | Transcribed locus | --- | 10.625 | 0.003 | 7.756  | 0.001 | 8.497   | 0.010 | 8.243  | 0.001 |
| 1374578_at   | AI409501 | Transcribed locus | --- | 3.033  | 0.003 | 1.511  | 0.042 | 2.267   | 0.033 | 1.495  | 0.011 |
| 1397247_at   | BI276505 | Transcribed locus | --- | 10.343 | 0.003 | 9.110  | 0.001 | 10.576  | 0.015 | 4.668  | 0.001 |
| 1377103_at   | AW525765 | Transcribed locus | --- | 0.579  | 0.003 | 0.962  | 0.362 | 0.520   | 0.022 | 1.002  | 0.979 |
| 1382438_at   | BF393639 | Transcribed locus | --- | 0.265  | 0.003 | 0.598  | 0.127 | 0.205   | 0.011 | 0.290  | 0.043 |
| 1374968_at   | AI599930 | Transcribed locus | --- | 0.565  | 0.003 | 0.627  | 0.033 | 0.541   | 0.081 | 0.548  | 0.016 |
| 1379373_at   | AI556457 | Transcribed locus | --- | 0.217  | 0.003 | 0.057  | 0.006 | 0.209   | 0.004 | 0.099  | 0.021 |
| 1379269_at   | BM385296 | Transcribed locus | --- | 1.951  | 0.003 | 0.623  | 0.018 | 3.975   | 0.001 | 1.085  | 0.455 |
| 1377825_at   | AI411841 | Transcribed locus | --- | 1.349  | 0.003 | 0.939  | 0.292 | 1.060   | 0.855 | 0.881  | 0.206 |
| 1389395_at   | BI275654 | Transcribed locus | --- | 0.442  | 0.003 | 0.338  | 0.024 | 0.442   | 0.007 | 0.744  | 0.189 |
| 1392982_at   | AA818059 | Transcribed locus | --- | 0.274  | 0.003 | 0.337  | 0.004 | 0.137   | 0.010 | 0.241  | 0.005 |
| 1378211_s_at | BE114473 | Transcribed locus | --- | 3.193  | 0.003 | 0.719  | 0.008 | 3.764   | 0.006 | 0.883  | 0.068 |
| 1396328_at   | BF390586 | Transcribed locus | --- | 0.461  | 0.003 | 0.184  | 0.001 | 0.368   | 0.004 | 0.238  | 0.023 |
| 1393193_at   | BF522381 | Transcribed locus | --- | 0.386  | 0.003 | 0.673  | 0.134 | 0.363   | 0.031 | 0.667  | 0.159 |
| 1389589_at   | BE105898 | Transcribed locus | --- | 0.511  | 0.004 | 0.499  | 0.065 | 0.560   | 0.014 | 0.799  | 0.237 |
| 1384163_at   | BE103875 | Transcribed locus | --- | 1.921  | 0.004 | 2.851  | 0.002 | 1.850   | 0.005 | 3.071  | 0.001 |
| 1374709_at   | AI406795 | Transcribed locus | --- | 1.196  | 0.004 | 0.629  | 0.080 | 1.002   | 0.925 | 0.641  | 0.041 |
| 1396307_at   | BF522907 | Transcribed locus | --- | 2.250  | 0.004 | 1.769  | 0.081 | 1.290   | 0.194 | 1.203  | 0.064 |
| 1379283_at   | BE117687 | Transcribed locus | --- | 0.468  | 0.004 | 0.857  | 0.061 | 0.510   | 0.003 | 0.677  | 0.007 |
| 1379267_a_at | AA924312 | Transcribed locus | --- | 0.505  | 0.004 | 0.486  | 0.011 | 0.744   | 0.100 | 0.616  | 0.116 |
| 1377424_at   | AI712672 | Transcribed locus | --- | 0.109  | 0.004 | 0.081  | 0.004 | 0.228   | 0.003 | 0.183  | 0.027 |
| 1375979_at   | AA945734 | Transcribed locus | --- | 14.516 | 0.004 | 4.092  | 0.004 | 4.182   | 0.021 | 2.404  | 0.005 |
| 1391411_at   | AI179941 | Transcribed locus | --- | 7.657  | 0.004 | 2.815  | 0.002 | 6.423   | 0.002 | 3.008  | 0.010 |
| 1392125_at   | BF390331 | Transcribed locus | --- | 0.241  | 0.004 | 0.645  | 0.432 | 0.339   | 0.004 | 0.554  | 0.011 |
| 1374803_at   | BG374219 | Transcribed locus | --- | 0.731  | 0.004 | 0.821  | 0.024 | 0.746   | 0.045 | 0.981  | 0.239 |
| 1377879_at   | BE102375 | Transcribed locus | --- | 2.344  | 0.004 | 0.938  | 0.969 | 1.299   | 0.406 | 0.625  | 0.204 |
| 1373678_at   | BE098848 | Transcribed locus | --- | 3.285  | 0.004 | 3.310  | 0.003 | 4.456   | 0.001 | 3.609  | 0.001 |
| 1392716_at   | BF282115 | Transcribed locus | --- | 0.367  | 0.004 | 0.482  | 0.009 | 0.479   | 0.003 | 0.568  | 0.037 |
| 1376398_at   | BF417784 | Transcribed locus | --- | 0.131  | 0.004 | 0.065  | 0.008 | 0.083   | 0.001 | 0.109  | 0.043 |
| 1382462_at   | BF290937 | Transcribed locus | --- | 0.348  | 0.004 | 0.761  | 0.061 | 0.345   | 0.003 | 0.566  | 0.053 |
| 1389586_at   | BE107169 | Transcribed locus | --- | 2.681  | 0.004 | 0.938  | 0.720 | 2.209   | 0.002 | 1.144  | 0.215 |
| 1378421_at   | BG671734 | Transcribed locus | --- | 2.650  | 0.004 | 0.747  | 0.146 | 2.324   | 0.003 | 0.874  | 0.338 |
| 1372778_at   | AA799420 | Transcribed locus | --- | 2.595  | 0.004 | 2.121  | 0.003 | 2.839   | 0.001 | 2.390  | 0.001 |
| 1393050_at   | BG664069 | Transcribed locus | --- | 2.905  | 0.004 | 2.253  | 0.017 | 2.526   | 0.017 | 2.852  | 0.006 |
| 1377996_at   | BE103975 | Transcribed locus | --- | 1.850  | 0.004 | 1.270  | 0.366 | 1.728   | 0.012 | 1.661  | 0.144 |
| 1378496_at   | BM384963 | Transcribed locus | --- | 0.121  | 0.005 | 1.538  | 0.277 | 0.164   | 0.001 | 1.713  | 0.207 |
| 1390543_at   | BF396416 | Transcribed locus | --- | 0.301  | 0.005 | 0.259  | 0.001 | 0.278   | 0.059 | 0.331  | 0.027 |
| 1380200_at   | AI102906 | Transcribed locus | --- | 4.966  | 0.005 | 2.295  | 0.001 | 5.354   | 0.001 | 2.326  | 0.001 |
| 1374079_at   | AW915055 | Transcribed locus | --- | 0.690  | 0.005 | 0.434  | 0.001 | 0.705   | 0.191 | 0.534  | 0.033 |
| 1378373_at   | BF522207 | Transcribed locus | --- | 1.786  | 0.005 | 0.497  | 0.099 | 0.894   | 0.509 | 0.514  | 0.002 |
| 1390393_at   | BF388422 | Transcribed locus | --- | 0.383  | 0.005 | 0.695  | 0.418 | 1.040   | 0.376 | 1.789  | 0.044 |
| 1398368_at   | AI406502 | Transcribed locus | --- | 0.551  | 0.005 | 0.184  | 0.000 | 0.649   | 0.146 | 0.286  | 0.012 |
| 1376916_at   | AW529183 | Transcribed locus | --- | 4.450  | 0.005 | 4.699  | 0.004 | 1.715   | 0.076 | 3.161  | 0.056 |
| 1389150_at   | AW524559 | Transcribed locus | --- | 3.264  | 0.005 | 2.204  | 0.000 | 2.366   | 0.012 | 2.007  | 0.002 |
| 1378133_at   | AW532618 | Transcribed locus | --- | 2.934  | 0.005 | 14.676 | 0.000 | 1.489   | 0.080 | 8.822  | 0.000 |
| 1376395_at   | AI145359 | Transcribed locus | --- | 0.369  | 0.005 | 0.132  | 0.005 | 0.200   | 0.026 | 0.158  | 0.015 |
| 1390443_at   | BE105661 | Transcribed locus | --- | 0.716  | 0.005 | 0.752  | 0.506 | 0.709   | 0.004 | 1.066  | 0.672 |
| 1383795_at   | BF521753 | Transcribed locus | --- | 0.748  | 0.005 | 0.694  | 0.005 | 0.749   | 0.025 | 0.685  | 0.022 |
| 1391958_at   | BE119699 | Transcribed locus | --- | 5.504  | 0.005 | 2.787  | 0.013 | 12.923  | 0.003 | 3.628  | 0.000 |

|              |          |                   |     |        |       |       |       |        |       |        |       |
|--------------|----------|-------------------|-----|--------|-------|-------|-------|--------|-------|--------|-------|
| 1392761_at   | BM389886 | Transcribed locus | --- | 1.683  | 0.005 | 0.866 | 0.020 | 1.549  | 0.008 | 0.911  | 0.244 |
| 1376930_at   | BI294860 | Transcribed locus | --- | 0.757  | 0.005 | 0.634 | 0.001 | 0.629  | 0.016 | 0.672  | 0.020 |
| 1389465_at   | AI231286 | Transcribed locus | --- | 2.360  | 0.005 | 1.476 | 0.071 | 2.570  | 0.001 | 1.784  | 0.011 |
| 1399121_at   | BE111600 | Transcribed locus | --- | 2.087  | 0.005 | 1.352 | 0.035 | 1.917  | 0.019 | 1.219  | 0.019 |
| 1390856_at   | BF289100 | Transcribed locus | --- | 1.959  | 0.005 | 0.620 | 0.008 | 1.029  | 0.726 | 0.798  | 0.029 |
| 1391251_at   | BI290666 | Transcribed locus | --- | 0.464  | 0.005 | 0.942 | 0.926 | 0.463  | 0.002 | 0.794  | 0.942 |
| 1374160_at   | BE111296 | Transcribed locus | --- | 0.128  | 0.005 | 0.220 | 0.003 | 0.240  | 0.023 | 0.187  | 0.041 |
| 1396621_at   | BF408910 | Transcribed locus | --- | 0.293  | 0.005 | 0.438 | 0.082 | 0.279  | 0.023 | 0.970  | 0.926 |
| 1393528_at   | AI059227 | Transcribed locus | --- | 0.111  | 0.006 | 0.057 | 0.008 | 0.091  | 0.003 | 0.101  | 0.041 |
| 1384184_at   | BE117485 | Transcribed locus | --- | 5.056  | 0.006 | 2.605 | 0.000 | 1.769  | 0.006 | 3.016  | 0.005 |
| 1384460_at   | AI072669 | Transcribed locus | --- | 0.141  | 0.006 | 0.131 | 0.001 | 0.113  | 0.000 | 0.140  | 0.021 |
| 1390203_at   | AI411149 | Transcribed locus | --- | 0.387  | 0.006 | 1.295 | 0.208 | 0.457  | 0.006 | 0.822  | 0.300 |
| 1384242_at   | BI303239 | Transcribed locus | --- | 4.780  | 0.006 | 1.117 | 0.600 | 2.623  | 0.002 | 1.085  | 0.326 |
| 1374060_at   | AI411374 | Transcribed locus | --- | 0.329  | 0.006 | 0.269 | 0.016 | 0.422  | 0.083 | 0.249  | 0.026 |
| 1379301_at   | BM384812 | Transcribed locus | --- | 0.803  | 0.006 | 0.892 | 0.149 | 0.824  | 0.008 | 1.089  | 0.899 |
| 1379089_at   | BM382838 | Transcribed locus | --- | 3.486  | 0.006 | 1.757 | 0.044 | 2.715  | 0.012 | 1.753  | 0.023 |
| 1393699_at   | BF391905 | Transcribed locus | --- | 0.523  | 0.006 | 0.394 | 0.000 | 0.414  | 0.009 | 0.346  | 0.010 |
| 1383967_at   | BI275739 | Transcribed locus | --- | 0.221  | 0.006 | 0.853 | 0.815 | 0.072  | 0.001 | 0.972  | 0.638 |
| 1383484_at   | AW920193 | Transcribed locus | --- | 1.502  | 0.006 | 1.097 | 0.607 | 1.211  | 0.146 | 1.093  | 0.037 |
| 1383770_at   | BE117323 | Transcribed locus | --- | 4.436  | 0.006 | 1.940 | 0.007 | 3.205  | 0.031 | 1.375  | 0.024 |
| 1377411_at   | BF404135 | Transcribed locus | --- | 2.326  | 0.006 | 1.274 | 0.595 | 3.102  | 0.005 | 1.185  | 0.382 |
| 1379607_at   | AW527767 | Transcribed locus | --- | 0.282  | 0.006 | 0.393 | 0.054 | 0.372  | 0.012 | 0.302  | 0.011 |
| 1390841_at   | BI290420 | Transcribed locus | --- | 2.379  | 0.006 | 0.457 | 0.023 | 2.670  | 0.008 | 0.538  | 0.013 |
| 1372466_at   | AI408571 | Transcribed locus | --- | 3.944  | 0.006 | 2.535 | 0.003 | 5.889  | 0.008 | 2.513  | 0.006 |
| 1373438_at   | BE329352 | Transcribed locus | --- | 0.632  | 0.006 | 1.484 | 0.014 | 0.548  | 0.010 | 1.355  | 0.007 |
| 1385169_at   | AI230598 | Transcribed locus | --- | 1.397  | 0.006 | 1.192 | 0.059 | 1.262  | 0.009 | 1.069  | 0.487 |
| 1396441_at   | BE108895 | Transcribed locus | --- | 0.523  | 0.006 | 1.943 | 0.102 | 0.507  | 0.002 | 1.378  | 0.295 |
| 1389687_at   | BI273981 | Transcribed locus | --- | 0.250  | 0.006 | 0.176 | 0.000 | 0.297  | 0.003 | 0.356  | 0.018 |
| 1377236_at   | BF405622 | Transcribed locus | --- | 1.675  | 0.006 | 1.177 | 0.074 | 1.258  | 0.281 | 1.164  | 0.046 |
| 1371575_at   | BF281185 | Transcribed locus | --- | 1.934  | 0.006 | 1.199 | 0.026 | 1.718  | 0.140 | 1.195  | 0.281 |
| 1386195_x_at | AI176775 | Transcribed locus | --- | 1.983  | 0.006 | 0.764 | 0.024 | 1.254  | 0.032 | 0.722  | 0.045 |
| 1371995_at   | AI599225 | Transcribed locus | --- | 0.718  | 0.006 | 1.452 | 0.006 | 0.732  | 0.013 | 1.014  | 0.223 |
| 1389706_at   | AI007639 | Transcribed locus | --- | 0.201  | 0.007 | 0.169 | 0.006 | 0.196  | 0.031 | 0.130  | 0.006 |
| 1377704_at   | BE117155 | Transcribed locus | --- | 1.298  | 0.007 | 1.307 | 0.628 | 1.290  | 0.048 | 1.243  | 0.152 |
| 1372850_at   | AA799464 | Transcribed locus | --- | 1.806  | 0.007 | 1.366 | 0.023 | 3.137  | 0.005 | 1.920  | 0.006 |
| 1382604_at   | BE117925 | Transcribed locus | --- | 0.406  | 0.007 | 0.565 | 0.034 | 0.332  | 0.000 | 0.606  | 0.018 |
| 1389718_at   | AA956417 | Transcribed locus | --- | 4.918  | 0.007 | 2.310 | 0.123 | 2.165  | 0.009 | 0.862  | 0.496 |
| 1383458_at   | BF403759 | Transcribed locus | --- | 0.666  | 0.007 | 0.294 | 0.005 | 0.881  | 0.226 | 0.376  | 0.032 |
| 1390832_at   | BI294696 | Transcribed locus | --- | 7.908  | 0.007 | 3.664 | 0.000 | 6.970  | 0.017 | 3.825  | 0.001 |
| 1397617_at   | BM382925 | Transcribed locus | --- | 1.329  | 0.007 | 1.477 | 0.024 | 0.781  | 0.470 | 1.186  | 0.115 |
| 1389474_at   | AA818380 | Transcribed locus | --- | 0.594  | 0.007 | 1.032 | 0.560 | 0.610  | 0.009 | 0.964  | 0.969 |
| 1375866_at   | BF396191 | Transcribed locus | --- | 3.301  | 0.007 | 1.938 | 0.005 | 1.657  | 0.168 | 1.896  | 0.009 |
| 1386252_at   | BE349825 | Transcribed locus | --- | 2.643  | 0.007 | 3.928 | 0.032 | 3.195  | 0.025 | 3.248  | 0.038 |
| 1379371_at   | BF284791 | Transcribed locus | --- | 9.103  | 0.007 | 6.541 | 0.000 | 10.197 | 0.005 | 5.111  | 0.009 |
| 1388561_at   | AI412886 | Transcribed locus | --- | 0.428  | 0.007 | 0.268 | 0.010 | 0.662  | 0.110 | 0.199  | 0.028 |
| 1391550_at   | BE108780 | Transcribed locus | --- | 1.664  | 0.007 | 0.995 | 0.109 | 2.610  | 0.017 | 1.208  | 0.027 |
| 1374736_at   | AI172004 | Transcribed locus | --- | 2.305  | 0.007 | 2.360 | 0.002 | 2.415  | 0.003 | 2.096  | 0.000 |
| 1373993_at   | AA799470 | Transcribed locus | --- | 0.657  | 0.008 | 0.580 | 0.002 | 0.596  | 0.010 | 0.553  | 0.001 |
| 1390457_at   | BM385762 | Transcribed locus | --- | 0.409  | 0.008 | 0.294 | 0.001 | 0.287  | 0.028 | 0.736  | 0.066 |
| 1377925_at   | BE105762 | Transcribed locus | --- | 2.176  | 0.008 | 1.899 | 0.025 | 1.275  | 0.340 | 1.438  | 0.022 |
| 1373843_at   | BE107419 | Transcribed locus | --- | 14.548 | 0.008 | 3.128 | 0.017 | 46.872 | 0.008 | 15.516 | 0.002 |
| 1390708_at   | AI012518 | Transcribed locus | --- | 3.171  | 0.008 | 1.978 | 0.019 | 2.438  | 0.031 | 1.878  | 0.009 |
| 1378603_at   | BM387125 | Transcribed locus | --- | 0.353  | 0.008 | 0.225 | 0.020 | 0.360  | 0.010 | 0.239  | 0.055 |
| 1374694_at   | BF284602 | Transcribed locus | --- | 0.742  | 0.008 | 0.516 | 0.041 | 1.002  | 0.138 | 0.700  | 0.136 |
| 1380400_at   | BF402498 | Transcribed locus | --- | 2.203  | 0.008 | 0.977 | 0.818 | 1.281  | 0.532 | 1.756  | 0.051 |
| 1393273_at   | AW533027 | Transcribed locus | --- | 0.269  | 0.008 | 0.310 | 0.004 | 0.229  | 0.024 | 0.327  | 0.006 |
| 1374752_at   | AI408734 | Transcribed locus | --- | 3.206  | 0.008 | 1.437 | 0.054 | 1.950  | 0.040 | 1.273  | 0.320 |
| 1394797_at   | BI276075 | Transcribed locus | --- | 2.215  | 0.008 | 1.321 | 0.095 | 1.493  | 0.399 | 1.647  | 0.110 |
| 1391828_at   | AI030836 | Transcribed locus | --- | 1.893  | 0.008 | 1.793 | 0.000 | 2.270  | 0.023 | 1.916  | 0.016 |
| 1391808_at   | AI535140 | Transcribed locus | --- | 3.738  | 0.008 | 2.707 | 0.025 | 5.747  | 0.009 | 3.345  | 0.073 |
| 1372515_at   | BI281177 | Transcribed locus | --- | 0.408  | 0.008 | 0.562 | 0.001 | 0.398  | 0.001 | 0.361  | 0.000 |

|              |          |                   |     |        |       |        |       |        |       |        |       |
|--------------|----------|-------------------|-----|--------|-------|--------|-------|--------|-------|--------|-------|
| 1377456_at   | BE116775 | Transcribed locus | --- | 0.418  | 0.008 | 0.312  | 0.023 | 0.610  | 0.006 | 0.353  | 0.129 |
| 1383929_at   | AI230265 | Transcribed locus | --- | 0.533  | 0.008 | 0.469  | 0.001 | 0.992  | 0.408 | 0.725  | 0.291 |
| 1390709_at   | AI102364 | Transcribed locus | --- | 2.385  | 0.008 | 1.683  | 0.025 | 1.817  | 0.013 | 1.501  | 0.089 |
| 1383786_at   | AW915417 | Transcribed locus | --- | 3.152  | 0.008 | 4.005  | 0.004 | 1.712  | 0.086 | 1.329  | 0.612 |
| 1382330_at   | BE116838 | Transcribed locus | --- | 0.550  | 0.008 | 0.536  | 0.038 | 0.554  | 0.016 | 0.623  | 0.098 |
| 1382497_at   | AA875457 | Transcribed locus | --- | 0.559  | 0.008 | 0.456  | 0.038 | 0.834  | 0.065 | 0.629  | 0.062 |
| 1390339_at   | BE099435 | Transcribed locus | --- | 0.437  | 0.008 | 0.522  | 0.021 | 0.226  | 0.005 | 0.494  | 0.029 |
| 1377757_at   | AA858978 | Transcribed locus | --- | 0.716  | 0.009 | 0.513  | 0.054 | 0.709  | 0.022 | 0.521  | 0.002 |
| 1373656_at   | AI713313 | Transcribed locus | --- | 0.304  | 0.009 | 0.318  | 0.002 | 0.280  | 0.005 | 0.364  | 0.001 |
| 1377790_at   | BE115859 | Transcribed locus | --- | 1.457  | 0.009 | 1.733  | 0.027 | 1.408  | 0.013 | 1.868  | 0.005 |
| 1379487_at   | BF287099 | Transcribed locus | --- | 2.195  | 0.009 | 0.638  | 0.067 | 1.950  | 0.421 | 1.014  | 0.594 |
| 1384699_at   | BM384930 | Transcribed locus | --- | 0.405  | 0.009 | 0.867  | 0.423 | 0.425  | 0.005 | 0.913  | 0.918 |
| 1397928_at   | BF389357 | Transcribed locus | --- | 0.376  | 0.009 | 0.604  | 0.056 | 0.882  | 0.734 | 0.994  | 0.623 |
| 1376066_at   | AI103572 | Transcribed locus | --- | 6.489  | 0.009 | 2.110  | 0.007 | 4.662  | 0.008 | 2.976  | 0.005 |
| 1395233_at   | BE107671 | Transcribed locus | --- | 0.542  | 0.009 | 0.940  | 0.846 | 0.341  | 0.024 | 0.963  | 0.968 |
| 1375793_at   | BI295700 | Transcribed locus | --- | 3.871  | 0.009 | 0.793  | 0.141 | 3.071  | 0.008 | 0.804  | 0.340 |
| 1392592_at   | AI137045 | Transcribed locus | --- | 4.348  | 0.009 | 2.546  | 0.014 | 6.254  | 0.006 | 4.316  | 0.014 |
| 1378070_at   | BE099891 | Transcribed locus | --- | 0.408  | 0.009 | 0.252  | 0.008 | 0.395  | 0.016 | 0.393  | 0.021 |
| 1379085_at   | BF396507 | Transcribed locus | --- | 1.217  | 0.009 | 1.099  | 0.223 | 1.272  | 0.067 | 0.652  | 0.093 |
| 1379719_at   | AI408386 | Transcribed locus | --- | 0.451  | 0.009 | 0.668  | 0.015 | 0.351  | 0.165 | 0.798  | 0.047 |
| 1374809_at   | BG672598 | Transcribed locus | --- | 0.542  | 0.009 | 0.506  | 0.003 | 0.857  | 0.029 | 0.634  | 0.000 |
| 1390907_at   | AI145039 | Transcribed locus | --- | 0.668  | 0.009 | 0.562  | 0.009 | 0.589  | 0.198 | 0.498  | 0.019 |
| 1392995_at   | BG669396 | Transcribed locus | --- | 0.807  | 0.009 | 0.976  | 0.204 | 0.639  | 0.002 | 0.865  | 0.587 |
| 1390895_at   | AA957047 | Transcribed locus | --- | 3.273  | 0.009 | 1.883  | 0.057 | 4.109  | 0.006 | 2.580  | 0.026 |
| 1380858_at   | BE120316 | Transcribed locus | --- | 0.423  | 0.009 | 0.417  | 0.023 | 0.469  | 0.084 | 0.242  | 0.008 |
| 1397871_at   | AI144643 | Transcribed locus | --- | 0.421  | 0.009 | 0.642  | 0.003 | 0.572  | 0.245 | 0.595  | 0.004 |
| 1380229_at   | AW530004 | Transcribed locus | --- | 14.165 | 0.009 | 54.328 | 0.001 | 9.311  | 0.003 | 26.059 | 0.000 |
| 1372258_at   | AI102935 | Transcribed locus | --- | 0.638  | 0.010 | 0.382  | 0.000 | 0.761  | 0.011 | 0.429  | 0.001 |
| 1397765_at   | BF406754 | Transcribed locus | --- | 0.553  | 0.010 | 0.314  | 0.001 | 0.646  | 0.063 | 0.582  | 0.010 |
| 1385379_at   | AA998187 | Transcribed locus | --- | 2.214  | 0.010 | 0.301  | 0.059 | 1.487  | 0.038 | 0.586  | 0.583 |
| 1376966_at   | BE108930 | Transcribed locus | --- | 0.312  | 0.010 | 0.298  | 0.001 | 0.465  | 0.019 | 0.326  | 0.002 |
| 1398393_at   | BF414412 | Transcribed locus | --- | 4.589  | 0.010 | 2.182  | 0.034 | 14.960 | 0.007 | 3.569  | 0.019 |
| 1390324_at   | BE101809 | Transcribed locus | --- | 0.092  | 0.010 | 0.103  | 0.002 | 0.065  | 0.011 | 0.251  | 0.056 |
| 1373594_at   | BE097279 | Transcribed locus | --- | 0.689  | 0.010 | 0.527  | 0.039 | 0.542  | 0.067 | 0.658  | 0.052 |
| 1372582_at   | AI407847 | Transcribed locus | --- | 1.210  | 0.010 | 1.240  | 0.245 | 1.375  | 0.046 | 1.322  | 0.008 |
| 1376590_at   | AA818732 | Transcribed locus | --- | 0.524  | 0.010 | 0.209  | 0.028 | 0.597  | 0.069 | 0.291  | 0.092 |
| 1398615_at   | BG379594 | Transcribed locus | --- | 2.092  | 0.010 | 1.341  | 0.043 | 1.628  | 0.027 | 1.269  | 0.034 |
| 1383527_at   | BF418522 | Transcribed locus | --- | 2.157  | 0.010 | 0.766  | 0.446 | 0.671  | 0.476 | 1.000  | 0.350 |
| 1381084_at   | AA964619 | Transcribed locus | --- | 0.563  | 0.010 | 0.527  | 0.062 | 0.924  | 0.881 | 1.010  | 0.492 |
| 1390400_a_at | BM390922 | Transcribed locus | --- | 2.172  | 0.010 | 0.744  | 0.158 | 1.413  | 0.089 | 0.641  | 0.001 |
| 1378346_at   | AI385237 | Transcribed locus | --- | 3.067  | 0.010 | 1.601  | 0.170 | 2.323  | 0.020 | 1.531  | 0.405 |
| 1374885_at   | AI172278 | Transcribed locus | --- | 0.296  | 0.010 | 0.187  | 0.000 | 0.471  | 0.005 | 0.202  | 0.001 |
| 1377651_at   | AI577848 | Transcribed locus | --- | 3.009  | 0.011 | 1.235  | 0.820 | 1.020  | 0.072 | 0.974  | 0.404 |
| 1381400_at   | AI137973 | Transcribed locus | --- | 0.517  | 0.011 | 1.077  | 0.554 | 0.355  | 0.003 | 0.997  | 0.947 |
| 1398969_at   | BE104323 | Transcribed locus | --- | 1.474  | 0.011 | 0.820  | 0.168 | 1.248  | 0.212 | 0.797  | 0.083 |
| 1382440_at   | AI410813 | Transcribed locus | --- | 0.453  | 0.011 | 0.301  | 0.000 | 0.310  | 0.004 | 0.340  | 0.047 |
| 1375051_at   | BE104792 | Transcribed locus | --- | 1.474  | 0.011 | 0.943  | 0.074 | 1.716  | 0.107 | 1.000  | 0.984 |
| 1376292_at   | BM383423 | Transcribed locus | --- | 6.332  | 0.011 | 6.194  | 0.002 | 3.632  | 0.025 | 2.998  | 0.013 |
| 1373351_at   | BI286775 | Transcribed locus | --- | 2.244  | 0.011 | 0.841  | 0.901 | 2.670  | 0.007 | 1.248  | 0.327 |
| 1373197_at   | AI578263 | Transcribed locus | --- | 4.028  | 0.011 | 1.399  | 0.055 | 25.420 | 0.001 | 3.381  | 0.021 |
| 1388986_at   | AI598339 | Transcribed locus | --- | 9.356  | 0.011 | 2.865  | 0.010 | 8.003  | 0.007 | 2.255  | 0.011 |
| 1376006_at   | BG373799 | Transcribed locus | --- | 4.939  | 0.011 | 5.059  | 0.002 | 4.796  | 0.011 | 3.243  | 0.001 |
| 1383499_at   | BG371995 | Transcribed locus | --- | 0.595  | 0.011 | 0.458  | 0.016 | 0.512  | 0.081 | 0.356  | 0.009 |
| 1392876_at   | BG375098 | Transcribed locus | --- | 2.936  | 0.011 | 7.562  | 0.006 | 3.118  | 0.022 | 5.913  | 0.001 |
| 1391979_at   | AA851345 | Transcribed locus | --- | 0.524  | 0.012 | 0.164  | 0.000 | 0.526  | 0.013 | 0.180  | 0.010 |
| 1393561_at   | BF396511 | Transcribed locus | --- | 1.772  | 0.012 | 0.625  | 0.004 | 2.209  | 0.001 | 0.898  | 0.069 |
| 1398578_at   | AI102019 | Transcribed locus | --- | 1.961  | 0.012 | 1.131  | 0.926 | 1.046  | 0.527 | 0.732  | 0.505 |
| 1378292_at   | BE096367 | Transcribed locus | --- | 1.979  | 0.012 | 0.775  | 0.052 | 1.996  | 0.013 | 1.641  | 0.117 |
| 1397572_at   | BE109994 | Transcribed locus | --- | 0.642  | 0.012 | 0.570  | 0.005 | 0.701  | 0.030 | 0.620  | 0.007 |
| 1388771_at   | BG668182 | Transcribed locus | --- | 1.570  | 0.012 | 1.171  | 0.154 | 1.534  | 0.013 | 1.135  | 0.046 |
| 1378210_at   | BE114473 | Transcribed locus | --- | 2.046  | 0.012 | 0.815  | 0.140 | 2.490  | 0.003 | 1.021  | 0.860 |



|            |          |                   |     |       |       |        |       |       |       |        |       |
|------------|----------|-------------------|-----|-------|-------|--------|-------|-------|-------|--------|-------|
| 1378457_at | AI179450 | Transcribed locus | --- | 0.353 | 0.012 | 0.874  | 0.557 | 0.562 | 0.054 | 0.894  | 0.351 |
| 1378672_at | BG381207 | Transcribed locus | --- | 0.316 | 0.012 | 0.512  | 0.125 | 0.797 | 0.341 | 0.542  | 0.009 |
| 1398497_at | BF391243 | Transcribed locus | --- | 0.166 | 0.012 | 0.424  | 0.024 | 0.314 | 0.008 | 0.665  | 0.112 |
| 1397888_at | BM389787 | Transcribed locus | --- | 0.641 | 0.012 | 0.524  | 0.000 | 0.775 | 0.082 | 0.303  | 0.003 |
| 1391866_at | AI014116 | Transcribed locus | --- | 1.420 | 0.012 | 2.531  | 0.085 | 0.888 | 0.745 | 1.275  | 0.271 |
| 1377221_at | AI411226 | Transcribed locus | --- | 1.252 | 0.013 | 0.441  | 0.003 | 1.485 | 0.007 | 0.321  | 0.012 |
| 1390727_at | BF398618 | Transcribed locus | --- | 1.305 | 0.013 | 0.625  | 0.038 | 1.290 | 0.291 | 0.833  | 0.072 |
| 1389584_at | AI101266 | Transcribed locus | --- | 0.261 | 0.013 | 0.131  | 0.005 | 0.127 | 0.001 | 0.091  | 0.030 |
| 1384268_at | AW435305 | Transcribed locus | --- | 0.080 | 0.013 | 0.134  | 0.000 | 0.212 | 0.022 | 0.153  | 0.002 |
| 1391672_at | BF399539 | Transcribed locus | --- | 0.337 | 0.013 | 0.053  | 0.000 | 0.297 | 0.010 | 0.110  | 0.015 |
| 1392762_at | BF559727 | Transcribed locus | --- | 0.640 | 0.013 | 0.618  | 0.086 | 0.518 | 0.002 | 0.814  | 0.245 |
| 1377045_at | BG372832 | Transcribed locus | --- | 0.484 | 0.013 | 0.217  | 0.003 | 0.740 | 0.103 | 0.373  | 0.012 |
| 1378091_at | AW528824 | Transcribed locus | --- | 0.681 | 0.013 | 0.281  | 0.054 | 0.631 | 0.021 | 0.339  | 0.051 |
| 1376205_at | BI286851 | Transcribed locus | --- | 2.213 | 0.013 | 1.440  | 0.016 | 2.403 | 0.003 | 1.757  | 0.016 |
| 1395536_at | BG673248 | Transcribed locus | --- | 0.449 | 0.014 | 0.139  | 0.021 | 0.538 | 0.010 | 0.178  | 0.026 |
| 1395705_at | BF412848 | Transcribed locus | --- | 0.454 | 0.014 | 0.376  | 0.072 | 0.669 | 0.662 | 0.343  | 0.094 |
| 1376996_at | AI556018 | Transcribed locus | --- | 1.702 | 0.014 | 1.431  | 0.090 | 1.746 | 0.013 | 1.324  | 0.071 |
| 1388915_at | BI295753 | Transcribed locus | --- | 5.128 | 0.014 | 1.490  | 0.089 | 6.296 | 0.000 | 2.540  | 0.009 |
| 1382381_at | AA818480 | Transcribed locus | --- | 1.808 | 0.014 | 1.612  | 0.016 | 2.127 | 0.015 | 1.888  | 0.008 |
| 1379873_at | BI276971 | Transcribed locus | --- | 0.638 | 0.014 | 1.048  | 0.547 | 0.630 | 0.043 | 1.122  | 0.638 |
| 1379382_at | AI144865 | Transcribed locus | --- | 2.023 | 0.014 | 1.431  | 0.220 | 1.345 | 0.045 | 1.482  | 0.176 |
| 1398707_at | BE108582 | Transcribed locus | --- | 0.245 | 0.014 | 0.114  | 0.001 | 0.203 | 0.015 | 0.277  | 0.035 |
| 1389602_at | BF396759 | Transcribed locus | --- | 0.597 | 0.014 | 0.512  | 0.005 | 0.640 | 0.001 | 0.658  | 0.004 |
| 1390364_at | AI044316 | Transcribed locus | --- | 6.074 | 0.014 | 3.891  | 0.002 | 7.136 | 0.006 | 1.946  | 0.043 |
| 1391802_at | BE107950 | Transcribed locus | --- | 0.513 | 0.014 | 0.636  | 0.153 | 0.338 | 0.008 | 0.581  | 0.190 |
| 1380831_at | AI237035 | Transcribed locus | --- | 1.383 | 0.014 | 1.523  | 0.077 | 1.201 | 0.252 | 1.231  | 0.698 |
| 1391003_at | BE117528 | Transcribed locus | --- | 1.403 | 0.014 | 1.158  | 0.469 | 1.424 | 0.009 | 0.982  | 0.725 |
| 1376065_at | AI058889 | Transcribed locus | --- | 0.547 | 0.014 | 2.538  | 0.005 | 0.378 | 0.013 | 2.400  | 0.001 |
| 1377273_at | BF389637 | Transcribed locus | --- | 0.338 | 0.014 | 0.307  | 0.012 | 0.541 | 0.026 | 0.354  | 0.020 |
| 1374243_at | AI102744 | Transcribed locus | --- | 0.623 | 0.014 | 0.500  | 0.002 | 0.808 | 0.265 | 0.702  | 0.004 |
| 1393052_at | BM392406 | Transcribed locus | --- | 1.822 | 0.014 | 3.125  | 0.000 | 0.980 | 0.359 | 2.263  | 0.002 |
| 1398978_at | AA850525 | Transcribed locus | --- | 0.654 | 0.014 | 0.545  | 0.001 | 0.770 | 0.217 | 0.747  | 0.000 |
| 1392026_at | BF391823 | Transcribed locus | --- | 0.410 | 0.014 | 0.797  | 0.120 | 0.828 | 0.044 | 0.578  | 0.014 |
| 1373515_at | BI275737 | Transcribed locus | --- | 0.536 | 0.015 | 0.558  | 0.004 | 0.642 | 0.045 | 0.682  | 0.019 |
| 1373679_at | AA946467 | Transcribed locus | --- | 2.481 | 0.015 | 8.726  | 0.000 | 1.191 | 0.297 | 10.298 | 0.002 |
| 1390444_at | AI044433 | Transcribed locus | --- | 0.630 | 0.015 | 0.434  | 0.147 | 1.051 | 0.103 | 0.448  | 0.036 |
| 1372347_at | BI289462 | Transcribed locus | --- | 1.846 | 0.015 | 2.111  | 0.002 | 2.083 | 0.192 | 1.735  | 0.002 |
| 1389246_at | BF282414 | Transcribed locus | --- | 1.846 | 0.015 | 1.692  | 0.026 | 1.727 | 0.026 | 1.598  | 0.030 |
| 1384882_at | AI229056 | Transcribed locus | --- | 3.184 | 0.015 | 6.414  | 0.000 | 1.539 | 0.084 | 3.893  | 0.000 |
| 1382705_at | BE116909 | Transcribed locus | --- | 0.577 | 0.015 | 0.539  | 0.120 | 0.813 | 0.138 | 0.424  | 0.055 |
| 1382610_at | AA957105 | Transcribed locus | --- | 2.232 | 0.015 | 1.178  | 0.927 | 3.864 | 0.005 | 1.920  | 0.030 |
| 1374896_at | AI101385 | Transcribed locus | --- | 0.495 | 0.015 | 0.296  | 0.000 | 0.695 | 0.031 | 0.373  | 0.020 |
| 1384892_at | AI029798 | Transcribed locus | --- | 2.179 | 0.015 | 1.117  | 0.288 | 2.111 | 0.048 | 1.671  | 0.009 |
| 1372390_at | AI710604 | Transcribed locus | --- | 0.810 | 0.015 | 0.565  | 0.003 | 0.918 | 0.200 | 0.624  | 0.005 |
| 1373269_at | AI407751 | Transcribed locus | --- | 0.400 | 0.015 | 0.709  | 0.044 | 0.438 | 0.186 | 0.649  | 0.088 |
| 1383894_at | BI289486 | Transcribed locus | --- | 5.541 | 0.015 | 10.412 | 0.005 | 1.150 | 0.710 | 3.820  | 0.012 |
| 1389613_at | AI234712 | Transcribed locus | --- | 3.299 | 0.016 | 0.464  | 0.013 | 3.211 | 0.011 | 0.513  | 0.015 |
| 1372937_at | AI012601 | Transcribed locus | --- | 1.918 | 0.016 | 1.001  | 0.959 | 1.376 | 0.041 | 0.994  | 0.969 |
| 1389794_at | AI044984 | Transcribed locus | --- | 0.531 | 0.016 | 0.304  | 0.007 | 0.626 | 0.052 | 0.463  | 0.032 |
| 1373736_at | AI178446 | Transcribed locus | --- | 0.625 | 0.016 | 0.368  | 0.001 | 0.634 | 0.010 | 0.644  | 0.024 |
| 1383444_at | AA964069 | Transcribed locus | --- | 0.387 | 0.016 | 0.279  | 0.000 | 0.508 | 0.027 | 0.359  | 0.025 |
| 1381275_at | AI179171 | Transcribed locus | --- | 2.130 | 0.016 | 0.984  | 0.992 | 1.885 | 0.032 | 1.169  | 0.333 |
| 1377748_at | BF410460 | Transcribed locus | --- | 0.676 | 0.016 | 0.970  | 0.379 | 0.804 | 0.019 | 1.109  | 0.028 |
| 1375523_at | BE108178 | Transcribed locus | --- | 0.564 | 0.016 | 0.173  | 0.000 | 0.614 | 0.043 | 0.216  | 0.017 |
| 1382777_at | BE108796 | Transcribed locus | --- | 4.486 | 0.016 | 1.468  | 0.292 | 3.401 | 0.091 | 1.778  | 0.133 |
| 1390134_at | AI411274 | Transcribed locus | --- | 3.325 | 0.016 | 1.665  | 0.008 | 4.125 | 0.012 | 2.171  | 0.012 |
| 1379310_at | AI101880 | Transcribed locus | --- | 2.899 | 0.016 | 2.235  | 0.002 | 2.193 | 0.057 | 1.641  | 0.011 |
| 1375575_at | BF403410 | Transcribed locus | --- | 0.654 | 0.016 | 0.519  | 0.007 | 0.560 | 0.002 | 0.403  | 0.033 |
| 1383660_at | AI713166 | Transcribed locus | --- | 0.658 | 0.016 | 0.712  | 0.144 | 0.719 | 0.014 | 0.592  | 0.011 |
| 1375962_at | BE102925 | Transcribed locus | --- | 2.113 | 0.016 | 1.673  | 0.085 | 1.994 | 0.064 | 1.197  | 0.199 |
| 1374480_at | BE107255 | Transcribed locus | --- | 1.931 | 0.016 | 0.992  | 0.901 | 2.494 | 0.001 | 1.300  | 0.067 |

|            |          |                   |     |        |       |        |       |        |       |        |       |
|------------|----------|-------------------|-----|--------|-------|--------|-------|--------|-------|--------|-------|
| 1373310_at | BF396512 | Transcribed locus | --- | 1.283  | 0.016 | 1.272  | 0.073 | 1.449  | 0.012 | 1.473  | 0.019 |
| 1391445_at | AI009603 | Transcribed locus | --- | 0.588  | 0.016 | 1.273  | 0.563 | 1.139  | 0.764 | 1.376  | 0.058 |
| 1398622_at | AI703807 | Transcribed locus | --- | 2.643  | 0.016 | 1.663  | 0.465 | 1.379  | 0.322 | 1.358  | 0.827 |
| 1375873_at | AI231506 | Transcribed locus | --- | 2.032  | 0.016 | 1.675  | 0.017 | 2.029  | 0.068 | 1.355  | 0.072 |
| 1383999_at | AW527651 | Transcribed locus | --- | 2.607  | 0.016 | 1.105  | 0.865 | 4.895  | 0.005 | 1.645  | 0.016 |
| 1378391_at | AI511069 | Transcribed locus | --- | 0.477  | 0.016 | 0.438  | 0.039 | 0.619  | 0.111 | 0.611  | 0.025 |
| 1372642_at | BE113397 | Transcribed locus | --- | 0.640  | 0.016 | 1.324  | 0.006 | 0.590  | 0.003 | 1.131  | 0.053 |
| 1372964_at | BI294751 | Transcribed locus | --- | 3.344  | 0.017 | 0.838  | 0.523 | 1.889  | 0.069 | 0.702  | 0.070 |
| 1374750_at | AI172313 | Transcribed locus | --- | 2.260  | 0.017 | 3.161  | 0.000 | 2.110  | 0.001 | 2.647  | 0.000 |
| 1389640_at | BM391811 | Transcribed locus | --- | 1.639  | 0.017 | 1.745  | 0.018 | 1.289  | 0.145 | 1.237  | 0.080 |
| 1377322_at | BE117290 | Transcribed locus | --- | 1.550  | 0.017 | 0.802  | 0.646 | 1.763  | 0.057 | 0.985  | 0.876 |
| 1384267_at | BF547003 | Transcribed locus | --- | 1.455  | 0.017 | 1.519  | 0.213 | 0.762  | 0.227 | 1.921  | 0.080 |
| 1378861_at | BE105498 | Transcribed locus | --- | 0.455  | 0.017 | 0.117  | 0.002 | 1.370  | 0.353 | 0.155  | 0.002 |
| 1375723_at | AI385171 | Transcribed locus | --- | 0.652  | 0.017 | 0.534  | 0.042 | 0.648  | 0.023 | 0.547  | 0.039 |
| 1378166_at | BE096995 | Transcribed locus | --- | 1.111  | 0.017 | 0.882  | 0.408 | 1.750  | 0.017 | 1.103  | 0.901 |
| 1396119_at | AW534209 | Transcribed locus | --- | 0.422  | 0.017 | 0.203  | 0.000 | 1.044  | 0.251 | 0.455  | 0.068 |
| 1391670_at | BI295819 | Transcribed locus | --- | 0.516  | 0.017 | 0.393  | 0.041 | 0.424  | 0.017 | 0.500  | 0.073 |
| 1389804_at | BF392605 | Transcribed locus | --- | 4.663  | 0.017 | 1.454  | 0.198 | 7.958  | 0.009 | 1.546  | 0.153 |
| 1381579_at | BF386959 | Transcribed locus | --- | 2.881  | 0.017 | 0.845  | 0.040 | 2.354  | 0.037 | 0.765  | 0.035 |
| 1394475_at | BE096857 | Transcribed locus | --- | 0.332  | 0.017 | 0.241  | 0.003 | 0.141  | 0.018 | 0.072  | 0.018 |
| 1398424_at | AA799515 | Transcribed locus | --- | 0.325  | 0.018 | 0.467  | 0.013 | 0.387  | 0.004 | 0.485  | 0.049 |
| 1391822_at | AW253356 | Transcribed locus | --- | 0.659  | 0.018 | 0.556  | 0.022 | 0.743  | 0.271 | 0.717  | 0.295 |
| 1378668_at | BG672426 | Transcribed locus | --- | 1.759  | 0.018 | 0.794  | 0.870 | 2.266  | 0.018 | 0.910  | 0.396 |
| 1381534_at | BI278449 | Transcribed locus | --- | 2.918  | 0.018 | 4.246  | 0.000 | 3.409  | 0.022 | 6.286  | 0.005 |
| 1390391_at | BF283381 | Transcribed locus | --- | 4.468  | 0.018 | 15.686 | 0.000 | 13.151 | 0.019 | 10.101 | 0.001 |
| 1373097_at | BF282125 | Transcribed locus | --- | 0.663  | 0.018 | 1.081  | 0.358 | 0.810  | 0.922 | 0.700  | 0.337 |
| 1372848_at | BI296915 | Transcribed locus | --- | 0.192  | 0.018 | 0.368  | 0.005 | 0.182  | 0.021 | 0.279  | 0.011 |
| 1379092_at | AI712997 | Transcribed locus | --- | 2.336  | 0.019 | 1.677  | 0.031 | 1.751  | 0.029 | 1.310  | 0.131 |
| 1390145_at | AW524532 | Transcribed locus | --- | 0.587  | 0.019 | 0.322  | 0.000 | 0.997  | 0.615 | 0.534  | 0.028 |
| 1380174_at | BE116115 | Transcribed locus | --- | 1.092  | 0.019 | 0.453  | 0.000 | 1.219  | 0.326 | 0.594  | 0.000 |
| 1389365_at | AI228291 | Transcribed locus | --- | 4.057  | 0.019 | 2.604  | 0.000 | 7.752  | 0.000 | 3.706  | 0.007 |
| 1392777_at | BF287676 | Transcribed locus | --- | 14.628 | 0.020 | 6.337  | 0.002 | 12.097 | 0.015 | 6.652  | 0.002 |
| 1377451_at | AI599250 | Transcribed locus | --- | 1.361  | 0.020 | 1.549  | 0.068 | 1.097  | 0.582 | 1.003  | 0.978 |
| 1378112_at | BI304019 | Transcribed locus | --- | 1.732  | 0.020 | 1.138  | 0.254 | 1.472  | 0.064 | 1.052  | 0.109 |
| 1373082_at | AA893743 | Transcribed locus | --- | 2.371  | 0.020 | 2.017  | 0.002 | 2.199  | 0.027 | 1.857  | 0.006 |
| 1376877_at | AA893164 | Transcribed locus | --- | 9.519  | 0.020 | 3.108  | 0.016 | 12.874 | 0.035 | 1.668  | 0.091 |
| 1392869_at | AI111868 | Transcribed locus | --- | 0.266  | 0.020 | 0.868  | 0.128 | 0.236  | 0.026 | 0.997  | 0.221 |
| 1389713_at | AI602851 | Transcribed locus | --- | 1.478  | 0.020 | 0.767  | 0.007 | 1.394  | 0.052 | 0.832  | 0.195 |
| 1374466_at | AI715484 | Transcribed locus | --- | 0.575  | 0.020 | 0.266  | 0.005 | 0.917  | 0.970 | 0.443  | 0.001 |
| 1372236_at | BI279079 | Transcribed locus | --- | 2.053  | 0.020 | 0.668  | 0.009 | 3.297  | 0.000 | 0.557  | 0.033 |
| 1376593_at | BF283990 | Transcribed locus | --- | 2.128  | 0.020 | 2.051  | 0.016 | 1.201  | 0.243 | 1.387  | 0.079 |
| 1377084_at | BE106598 | Transcribed locus | --- | 0.655  | 0.020 | 0.933  | 0.116 | 0.514  | 0.031 | 0.865  | 0.486 |
| 1386621_at | AW142419 | Transcribed locus | --- | 2.251  | 0.021 | 1.590  | 0.052 | 2.038  | 0.020 | 1.192  | 0.093 |
| 1375585_at | BE111820 | Transcribed locus | --- | 2.521  | 0.021 | 1.723  | 0.074 | 5.143  | 0.016 | 1.889  | 0.006 |
| 1394097_at | AA849706 | Transcribed locus | --- | 0.525  | 0.021 | 0.970  | 0.420 | 0.413  | 0.001 | 0.654  | 0.015 |
| 1373070_at | AI406379 | Transcribed locus | --- | 1.268  | 0.021 | 0.658  | 0.008 | 1.162  | 0.037 | 0.689  | 0.020 |
| 1390024_at | AI237685 | Transcribed locus | --- | 4.018  | 0.022 | 1.818  | 0.152 | 13.952 | 0.000 | 4.139  | 0.001 |
| 1374760_at | BG374448 | Transcribed locus | --- | 4.083  | 0.022 | 2.577  | 0.014 | 3.681  | 0.117 | 2.621  | 0.003 |
| 1397417_at | BG671626 | Transcribed locus | --- | 1.391  | 0.022 | 1.101  | 0.087 | 1.734  | 0.024 | 1.214  | 0.107 |
| 1374935_at | AI412099 | Transcribed locus | --- | 2.030  | 0.022 | 1.036  | 0.751 | 1.376  | 0.369 | 0.892  | 0.382 |
| 1374064_at | BG376942 | Transcribed locus | --- | 0.590  | 0.022 | 0.967  | 0.594 | 0.757  | 0.005 | 0.902  | 0.894 |
| 1378018_at | BE098045 | Transcribed locus | --- | 0.402  | 0.022 | 0.402  | 0.001 | 0.280  | 0.000 | 0.375  | 0.019 |
| 1389159_at | BM385437 | Transcribed locus | --- | 0.391  | 0.022 | 0.422  | 0.004 | 0.369  | 0.009 | 0.411  | 0.000 |
| 1382023_at | AI407113 | Transcribed locus | --- | 0.618  | 0.022 | 0.875  | 0.394 | 0.298  | 0.025 | 0.682  | 0.320 |
| 1399064_at | AI009591 | Transcribed locus | --- | 0.459  | 0.022 | 0.674  | 0.011 | 0.601  | 0.074 | 0.582  | 0.072 |
| 1372921_at | AI073219 | Transcribed locus | --- | 0.409  | 0.023 | 1.164  | 0.729 | 0.286  | 0.003 | 1.002  | 0.991 |
| 1388662_at | BF392884 | Transcribed locus | --- | 1.899  | 0.023 | 1.466  | 0.131 | 1.779  | 0.083 | 1.187  | 0.243 |
| 1377893_at | BM390475 | Transcribed locus | --- | 1.981  | 0.023 | 0.313  | 0.014 | 4.180  | 0.000 | 0.758  | 0.108 |
| 1373761_at | AI176129 | Transcribed locus | --- | 1.510  | 0.023 | 4.497  | 0.002 | 2.617  | 0.015 | 2.985  | 0.001 |
| 1384435_at | AA964258 | Transcribed locus | --- | 0.586  | 0.023 | 0.844  | 0.619 | 0.593  | 0.214 | 0.792  | 0.351 |
| 1383645_at | BF411062 | Transcribed locus | --- | 0.362  | 0.023 | 0.234  | 0.004 | 0.467  | 0.065 | 0.216  | 0.008 |

|            |          |                   |     |       |       |       |       |        |       |       |       |
|------------|----------|-------------------|-----|-------|-------|-------|-------|--------|-------|-------|-------|
| 1377376_at | BF397554 | Transcribed locus | --- | 1.145 | 0.023 | 1.059 | 0.561 | 1.580  | 0.121 | 1.361 | 0.374 |
| 1381981_at | BE101088 | Transcribed locus | --- | 0.772 | 0.023 | 0.879 | 0.327 | 1.026  | 0.638 | 1.039 | 0.970 |
| 1372449_at | AW253616 | Transcribed locus | --- | 0.610 | 0.023 | 0.193 | 0.000 | 0.738  | 0.097 | 0.330 | 0.000 |
| 1380193_at | BM387449 | Transcribed locus | --- | 1.998 | 0.023 | 0.396 | 0.618 | 1.303  | 0.025 | 0.394 | 0.587 |
| 1390463_at | BG378294 | Transcribed locus | --- | 0.506 | 0.023 | 0.440 | 0.004 | 0.511  | 0.001 | 0.596 | 0.006 |
| 1373225_at | AI102618 | Transcribed locus | --- | 2.078 | 0.023 | 1.315 | 0.010 | 2.215  | 0.000 | 1.267 | 0.036 |
| 1395751_at | AI501450 | Transcribed locus | --- | 1.598 | 0.024 | 1.110 | 0.001 | 0.895  | 0.996 | 1.813 | 0.087 |
| 1390669_at | AI639410 | Transcribed locus | --- | 1.447 | 0.024 | 0.799 | 0.024 | 2.205  | 0.002 | 1.072 | 0.860 |
| 1388999_at | BF397907 | Transcribed locus | --- | 1.217 | 0.024 | 1.393 | 0.028 | 1.071  | 0.468 | 1.606 | 0.043 |
| 1384678_at | BF559356 | Transcribed locus | --- | 1.556 | 0.024 | 1.134 | 0.636 | 1.233  | 0.363 | 1.662 | 0.110 |
| 1385841_at | BM383983 | Transcribed locus | --- | 0.195 | 0.024 | 0.192 | 0.007 | 0.460  | 0.032 | 0.466 | 0.020 |
| 1372884_at | BG381486 | Transcribed locus | --- | 0.498 | 0.024 | 0.313 | 0.006 | 0.373  | 0.009 | 0.559 | 0.012 |
| 1373998_at | BM389853 | Transcribed locus | --- | 5.861 | 0.024 | 1.300 | 0.313 | 6.770  | 0.024 | 1.672 | 0.051 |
| 1396850_at | AI501434 | Transcribed locus | --- | 1.782 | 0.024 | 1.129 | 0.892 | 1.618  | 0.172 | 0.980 | 0.929 |
| 1375647_at | BG671943 | Transcribed locus | --- | 1.488 | 0.024 | 1.248 | 0.220 | 1.413  | 0.005 | 1.230 | 0.656 |
| 1378134_at | BI291629 | Transcribed locus | --- | 1.821 | 0.024 | 0.767 | 0.008 | 0.922  | 0.932 | 0.656 | 0.042 |
| 1393732_at | AI071024 | Transcribed locus | --- | 1.197 | 0.024 | 1.003 | 0.670 | 1.288  | 0.007 | 1.194 | 0.958 |
| 1394467_at | AI511367 | Transcribed locus | --- | 0.106 | 0.024 | 0.050 | 0.043 | 0.472  | 0.034 | 0.044 | 0.047 |
| 1373176_at | AA943208 | Transcribed locus | --- | 3.171 | 0.024 | 1.523 | 0.027 | 3.714  | 0.032 | 1.531 | 0.264 |
| 1371601_at | BE107520 | Transcribed locus | --- | 0.788 | 0.024 | 0.689 | 0.008 | 0.713  | 0.009 | 0.618 | 0.027 |
| 1374653_at | BF413204 | Transcribed locus | --- | 0.545 | 0.024 | 0.891 | 0.913 | 0.798  | 0.048 | 0.917 | 0.851 |
| 1382304_at | AW528823 | Transcribed locus | --- | 0.847 | 0.025 | 0.360 | 0.038 | 1.062  | 0.368 | 0.546 | 0.012 |
| 1392653_at | BE118116 | Transcribed locus | --- | 7.540 | 0.025 | 2.353 | 0.017 | 3.994  | 0.033 | 2.363 | 0.047 |
| 1389698_at | AI010312 | Transcribed locus | --- | 0.606 | 0.025 | 0.376 | 0.002 | 0.683  | 0.346 | 0.362 | 0.026 |
| 1393117_at | BI286900 | Transcribed locus | --- | 0.692 | 0.025 | 0.652 | 0.008 | 0.545  | 0.075 | 0.643 | 0.146 |
| 1371529_at | BF289001 | Transcribed locus | --- | 2.352 | 0.025 | 1.286 | 0.081 | 3.627  | 0.002 | 1.876 | 0.043 |
| 1390351_at | AI231225 | Transcribed locus | --- | 1.712 | 0.025 | 0.652 | 0.017 | 1.629  | 0.053 | 0.784 | 0.068 |
| 1397679_at | BF550199 | Transcribed locus | --- | 1.406 | 0.025 | 1.213 | 0.028 | 1.365  | 0.237 | 1.032 | 0.550 |
| 1371485_at | BI283695 | Transcribed locus | --- | 1.664 | 0.025 | 1.376 | 0.361 | 0.701  | 0.657 | 1.035 | 0.063 |
| 1384671_at | AI059958 | Transcribed locus | --- | 8.231 | 0.025 | 1.527 | 0.177 | 1.829  | 0.160 | 0.772 | 0.395 |
| 1373986_at | AI410107 | Transcribed locus | --- | 2.154 | 0.025 | 2.994 | 0.001 | 0.971  | 0.818 | 2.381 | 0.002 |
| 1391702_at | BM389392 | Transcribed locus | --- | 0.649 | 0.026 | 0.488 | 0.001 | 0.857  | 0.737 | 0.611 | 0.013 |
| 1390470_at | BE107044 | Transcribed locus | --- | 1.728 | 0.026 | 0.535 | 0.004 | 1.214  | 0.194 | 0.708 | 0.368 |
| 1378590_at | AW527807 | Transcribed locus | --- | 1.456 | 0.026 | 1.087 | 0.612 | 1.489  | 0.054 | 0.770 | 0.782 |
| 1371726_at | AW433870 | Transcribed locus | --- | 1.404 | 0.026 | 1.002 | 0.087 | 0.982  | 0.489 | 1.213 | 0.248 |
| 1373545_at | AI406964 | Transcribed locus | --- | 0.637 | 0.026 | 0.256 | 0.075 | 0.633  | 0.026 | 0.370 | 0.072 |
| 1397731_at | AA998060 | Transcribed locus | --- | 1.948 | 0.026 | 1.602 | 0.099 | 2.394  | 0.026 | 1.840 | 0.076 |
| 1377884_at | BG671879 | Transcribed locus | --- | 1.251 | 0.026 | 1.055 | 0.705 | 0.936  | 0.051 | 1.075 | 0.073 |
| 1396297_at | BG374359 | Transcribed locus | --- | 4.006 | 0.026 | 1.211 | 0.063 | 5.120  | 0.007 | 1.687 | 0.125 |
| 1394290_at | BG669921 | Transcribed locus | --- | 3.078 | 0.026 | 1.977 | 0.051 | 1.976  | 0.059 | 2.122 | 0.243 |
| 1372225_at | BE119802 | Transcribed locus | --- | 1.706 | 0.026 | 1.255 | 0.041 | 4.066  | 0.003 | 1.397 | 0.015 |
| 1388743_at | BI297291 | Transcribed locus | --- | 0.508 | 0.026 | 0.109 | 0.001 | 0.624  | 0.072 | 0.174 | 0.022 |
| 1394942_at | AI408528 | Transcribed locus | --- | 1.089 | 0.027 | 1.022 | 0.882 | 1.002  | 0.749 | 0.979 | 0.846 |
| 1371616_at | AW524495 | Transcribed locus | --- | 2.306 | 0.027 | 0.591 | 0.058 | 3.043  | 0.014 | 0.873 | 0.437 |
| 1376357_at | AA875143 | Transcribed locus | --- | 1.340 | 0.027 | 0.696 | 0.011 | 1.487  | 0.092 | 0.851 | 0.007 |
| 1382313_at | AI511408 | Transcribed locus | --- | 0.660 | 0.027 | 0.779 | 0.061 | 0.746  | 0.367 | 0.707 | 0.076 |
| 1393482_at | AI045330 | Transcribed locus | --- | 0.099 | 0.027 | 0.032 | 0.000 | 0.092  | 0.002 | 0.076 | 0.012 |
| 1378222_at | BF389961 | Transcribed locus | --- | 1.416 | 0.027 | 0.630 | 0.055 | 1.377  | 0.039 | 1.010 | 0.883 |
| 1373328_at | AI009678 | Transcribed locus | --- | 0.728 | 0.027 | 0.693 | 0.081 | 0.504  | 0.003 | 0.984 | 0.145 |
| 1379379_at | BF392753 | Transcribed locus | --- | 7.234 | 0.027 | 1.455 | 0.411 | 14.214 | 0.000 | 3.652 | 0.006 |
| 1383363_at | BF418817 | Transcribed locus | --- | 0.369 | 0.027 | 2.435 | 0.025 | 0.414  | 0.017 | 3.392 | 0.334 |
| 1374350_at | BM382988 | Transcribed locus | --- | 0.329 | 0.028 | 0.176 | 0.000 | 0.473  | 0.061 | 0.292 | 0.016 |
| 1381036_at | AW434394 | Transcribed locus | --- | 2.118 | 0.028 | 1.540 | 0.031 | 0.993  | 0.226 | 1.214 | 0.376 |
| 1390885_at | AW535696 | Transcribed locus | --- | 1.965 | 0.028 | 0.870 | 0.173 | 1.272  | 0.035 | 0.727 | 0.084 |
| 1380365_at | BF403932 | Transcribed locus | --- | 0.600 | 0.028 | 0.673 | 0.042 | 0.701  | 0.072 | 0.739 | 0.004 |
| 1396813_at | AW528749 | Transcribed locus | --- | 2.150 | 0.028 | 0.994 | 0.826 | 3.046  | 0.030 | 1.112 | 0.429 |
| 1390356_at | AW535401 | Transcribed locus | --- | 1.528 | 0.028 | 1.063 | 0.128 | 1.723  | 0.005 | 1.383 | 0.008 |
| 1373311_at | BF405581 | Transcribed locus | --- | 1.586 | 0.028 | 3.223 | 0.020 | 1.048  | 0.728 | 2.201 | 0.040 |
| 1376842_at | BF395964 | Transcribed locus | --- | 3.740 | 0.028 | 2.471 | 0.007 | 3.077  | 0.048 | 2.457 | 0.010 |
| 1374435_at | AA996970 | Transcribed locus | --- | 1.218 | 0.029 | 1.046 | 0.531 | 1.295  | 0.008 | 1.078 | 0.062 |
| 1391571_at | BG666079 | Transcribed locus | --- | 0.671 | 0.029 | 0.886 | 0.143 | 0.663  | 0.019 | 0.948 | 0.791 |

|              |          |                   |     |       |       |       |       |       |       |       |       |
|--------------|----------|-------------------|-----|-------|-------|-------|-------|-------|-------|-------|-------|
| 1390962_at   | BM385344 | Transcribed locus | --- | 1.093 | 0.029 | 1.005 | 0.992 | 1.341 | 0.107 | 1.028 | 0.705 |
| 1384059_at   | BE115159 | Transcribed locus | --- | 0.517 | 0.029 | 0.289 | 0.015 | 0.492 | 0.032 | 0.460 | 0.020 |
| 1373497_at   | BE109208 | Transcribed locus | --- | 1.224 | 0.029 | 1.155 | 0.150 | 1.367 | 0.036 | 1.296 | 0.080 |
| 1389437_at   | BF392952 | Transcribed locus | --- | 0.525 | 0.029 | 0.297 | 0.001 | 0.393 | 0.151 | 0.392 | 0.001 |
| 1397300_at   | BG371544 | Transcribed locus | --- | 0.626 | 0.029 | 0.601 | 0.040 | 0.998 | 0.851 | 0.881 | 0.618 |
| 1397348_at   | BE118444 | Transcribed locus | --- | 2.975 | 0.029 | 0.979 | 0.087 | 3.817 | 0.028 | 1.532 | 0.210 |
| 1393265_at   | BF546659 | Transcribed locus | --- | 1.508 | 0.030 | 0.791 | 0.207 | 1.007 | 0.983 | 0.819 | 0.409 |
| 1371766_at   | BE113242 | Transcribed locus | --- | 0.893 | 0.030 | 0.859 | 0.078 | 1.285 | 0.126 | 0.828 | 0.171 |
| 1380660_at   | BI295181 | Transcribed locus | --- | 1.080 | 0.030 | 1.011 | 0.995 | 1.034 | 0.409 | 1.000 | 0.977 |
| 1379251_at   | BF398485 | Transcribed locus | --- | 1.178 | 0.030 | 1.122 | 0.061 | 1.340 | 0.059 | 1.230 | 0.000 |
| 1398447_at   | AA801323 | Transcribed locus | --- | 0.580 | 0.030 | 0.491 | 0.001 | 0.884 | 0.216 | 0.625 | 0.009 |
| 1393516_at   | AA892335 | Transcribed locus | --- | 0.381 | 0.030 | 0.229 | 0.011 | 0.460 | 0.011 | 0.405 | 0.079 |
| 1384839_at   | AW522827 | Transcribed locus | --- | 0.384 | 0.030 | 0.498 | 0.009 | 0.953 | 0.849 | 0.586 | 0.046 |
| 1382341_at   | AI136740 | Transcribed locus | --- | 1.250 | 0.030 | 0.890 | 0.175 | 1.365 | 0.061 | 0.648 | 0.177 |
| 1384032_at   | AI058837 | Transcribed locus | --- | 1.947 | 0.030 | 0.588 | 0.004 | 2.499 | 0.003 | 1.073 | 0.689 |
| 1395779_at   | BF523321 | Transcribed locus | --- | 1.505 | 0.030 | 0.512 | 0.004 | 1.868 | 0.001 | 0.645 | 0.024 |
| 1397924_at   | AW523490 | Transcribed locus | --- | 0.551 | 0.030 | 0.967 | 0.419 | 0.998 | 0.321 | 1.200 | 0.203 |
| 1394120_a_at | AI176775 | Transcribed locus | --- | 2.070 | 0.030 | 0.585 | 0.035 | 1.281 | 0.257 | 0.837 | 0.042 |
| 1398613_at   | AW532063 | Transcribed locus | --- | 0.911 | 0.030 | 0.399 | 0.021 | 0.905 | 0.059 | 0.398 | 0.013 |
| 1376127_at   | BE117201 | Transcribed locus | --- | 0.801 | 0.031 | 0.804 | 0.002 | 0.671 | 0.015 | 0.830 | 0.018 |
| 1373207_at   | AI235503 | Transcribed locus | --- | 0.911 | 0.031 | 0.634 | 0.003 | 0.900 | 0.106 | 0.775 | 0.036 |
| 1381807_at   | BM383408 | Transcribed locus | --- | 0.231 | 0.031 | 0.806 | 0.518 | 0.652 | 0.074 | 1.000 | 0.627 |
| 1374483_at   | BE098873 | Transcribed locus | --- | 0.364 | 0.031 | 0.975 | 0.565 | 0.264 | 0.050 | 1.681 | 0.002 |
| 1392516_a_at | AI236580 | Transcribed locus | --- | 0.611 | 0.031 | 0.437 | 0.021 | 0.686 | 0.059 | 0.405 | 0.040 |
| 1381008_at   | BF390077 | Transcribed locus | --- | 0.587 | 0.032 | 1.243 | 0.282 | 0.626 | 0.095 | 1.151 | 0.122 |
| 1374796_at   | AI413058 | Transcribed locus | --- | 0.386 | 0.032 | 0.164 | 0.000 | 0.418 | 0.001 | 0.248 | 0.005 |
| 1380033_at   | AI408858 | Transcribed locus | --- | 0.778 | 0.032 | 0.570 | 0.000 | 0.719 | 0.127 | 1.027 | 0.780 |
| 1378299_at   | BF397445 | Transcribed locus | --- | 1.734 | 0.032 | 0.947 | 0.339 | 1.881 | 0.023 | 0.986 | 0.977 |
| 1380152_at   | BF407782 | Transcribed locus | --- | 0.696 | 0.032 | 0.485 | 0.037 | 0.668 | 0.086 | 0.448 | 0.172 |
| 1380064_at   | BE113961 | Transcribed locus | --- | 1.763 | 0.032 | 0.657 | 0.000 | 1.479 | 0.037 | 0.846 | 0.064 |
| 1390731_at   | BI288533 | Transcribed locus | --- | 2.154 | 0.032 | 2.224 | 0.025 | 1.728 | 0.494 | 1.503 | 0.583 |
| 1374702_at   | BI291393 | Transcribed locus | --- | 0.622 | 0.032 | 0.506 | 0.003 | 0.530 | 0.011 | 0.553 | 0.036 |
| 1374410_at   | BI278611 | Transcribed locus | --- | 3.640 | 0.032 | 1.450 | 0.034 | 3.959 | 0.033 | 1.784 | 0.033 |
| 1374150_at   | AA875425 | Transcribed locus | --- | 1.236 | 0.032 | 1.650 | 0.013 | 1.333 | 0.073 | 1.829 | 0.006 |
| 1371552_at   | BF400684 | Transcribed locus | --- | 0.520 | 0.032 | 0.697 | 0.158 | 1.095 | 0.172 | 0.835 | 0.601 |
| 1396460_at   | AW522969 | Transcribed locus | --- | 0.501 | 0.033 | 0.308 | 0.000 | 0.771 | 0.026 | 0.269 | 0.000 |
| 1391683_at   | BF563946 | Transcribed locus | --- | 1.564 | 0.033 | 1.224 | 0.662 | 1.465 | 0.049 | 1.097 | 0.567 |
| 1392698_a_at | AA899844 | Transcribed locus | --- | 0.586 | 0.033 | 0.792 | 0.038 | 0.756 | 0.047 | 0.841 | 0.041 |
| 1383210_at   | BF554576 | Transcribed locus | --- | 4.543 | 0.033 | 2.216 | 0.184 | 2.836 | 0.109 | 3.294 | 0.098 |
| 1393413_at   | BI290400 | Transcribed locus | --- | 3.106 | 0.033 | 3.103 | 0.007 | 2.242 | 0.011 | 1.678 | 0.038 |
| 1377712_at   | AI556865 | Transcribed locus | --- | 0.723 | 0.033 | 0.451 | 0.166 | 0.431 | 0.018 | 0.634 | 0.162 |
| 1391774_at   | AW526131 | Transcribed locus | --- | 0.339 | 0.033 | 0.326 | 0.009 | 1.459 | 0.238 | 0.412 | 0.027 |
| 1383237_at   | BE098240 | Transcribed locus | --- | 1.532 | 0.033 | 1.250 | 0.055 | 0.726 | 0.181 | 1.079 | 0.414 |
| 1378004_at   | BF287788 | Transcribed locus | --- | 0.478 | 0.033 | 0.405 | 0.025 | 0.601 | 0.045 | 0.641 | 0.080 |
| 1396037_at   | BF544069 | Transcribed locus | --- | 1.720 | 0.034 | 0.608 | 0.254 | 1.617 | 0.114 | 0.963 | 0.494 |
| 1382755_at   | AI058343 | Transcribed locus | --- | 1.621 | 0.034 | 2.305 | 0.013 | 1.694 | 0.008 | 2.394 | 0.029 |
| 1392575_at   | BE108929 | Transcribed locus | --- | 0.727 | 0.034 | 0.777 | 0.009 | 0.687 | 0.014 | 0.819 | 0.107 |
| 1384277_at   | BM388018 | Transcribed locus | --- | 1.642 | 0.034 | 1.165 | 0.138 | 1.834 | 0.026 | 1.137 | 0.086 |
| 1374281_at   | BE109901 | Transcribed locus | --- | 1.360 | 0.034 | 1.520 | 0.027 | 1.135 | 0.098 | 1.569 | 0.014 |
| 1375897_at   | AI101372 | Transcribed locus | --- | 0.938 | 0.034 | 1.433 | 0.054 | 0.615 | 0.211 | 0.996 | 0.990 |
| 1374780_at   | AI232806 | Transcribed locus | --- | 0.857 | 0.034 | 0.520 | 0.045 | 0.759 | 0.073 | 0.607 | 0.001 |
| 1389722_at   | BF408457 | Transcribed locus | --- | 5.386 | 0.034 | 0.568 | 0.044 | 8.004 | 0.005 | 0.640 | 0.944 |
| 1397199_at   | BF408180 | Transcribed locus | --- | 1.241 | 0.034 | 1.082 | 0.553 | 0.717 | 0.266 | 0.972 | 0.574 |
| 1385014_at   | BG377996 | Transcribed locus | --- | 0.351 | 0.034 | 0.456 | 0.003 | 0.413 | 0.075 | 0.644 | 0.039 |
| 1371798_at   | AI013011 | Transcribed locus | --- | 0.524 | 0.035 | 0.613 | 0.001 | 0.472 | 0.004 | 0.761 | 0.014 |
| 1380369_at   | AI058315 | Transcribed locus | --- | 1.196 | 0.035 | 0.841 | 0.966 | 1.352 | 0.400 | 0.705 | 0.021 |
| 1381885_at   | BE102910 | Transcribed locus | --- | 1.167 | 0.035 | 1.826 | 0.029 | 1.111 | 0.362 | 1.328 | 0.093 |
| 1376330_at   | BF393046 | Transcribed locus | --- | 0.303 | 0.035 | 0.321 | 0.006 | 0.278 | 0.022 | 0.348 | 0.004 |
| 1373023_at   | BF555947 | Transcribed locus | --- | 0.632 | 0.035 | 0.223 | 0.002 | 0.550 | 0.032 | 0.302 | 0.002 |
| 1374703_at   | BI304209 | Transcribed locus | --- | 0.638 | 0.035 | 0.556 | 0.003 | 0.546 | 0.023 | 0.682 | 0.005 |
| 1377880_at   | AI170633 | Transcribed locus | --- | 0.559 | 0.035 | 1.069 | 0.203 | 0.808 | 0.222 | 1.039 | 0.743 |

|              |          |                   |     |        |       |       |       |        |       |        |       |
|--------------|----------|-------------------|-----|--------|-------|-------|-------|--------|-------|--------|-------|
| 1378467_at   | AA851361 | Transcribed locus | --- | 1.914  | 0.035 | 0.942 | 0.216 | 2.641  | 0.005 | 1.252  | 0.652 |
| 1377155_at   | BI294806 | Transcribed locus | --- | 0.258  | 0.035 | 0.169 | 0.000 | 0.238  | 0.049 | 0.359  | 0.008 |
| 1379381_at   | AI045321 | Transcribed locus | --- | 3.199  | 0.036 | 1.001 | 0.553 | 4.312  | 0.001 | 0.916  | 0.665 |
| 1389075_at   | AI600221 | Transcribed locus | --- | 0.391  | 0.036 | 1.836 | 0.079 | 0.321  | 0.021 | 1.460  | 0.024 |
| 1384847_at   | AA924641 | Transcribed locus | --- | 2.547  | 0.036 | 1.230 | 0.529 | 2.584  | 0.104 | 0.618  | 0.075 |
| 1384238_at   | BM385249 | Transcribed locus | --- | 0.632  | 0.036 | 0.246 | 0.000 | 0.328  | 0.001 | 0.260  | 0.010 |
| 1395704_at   | BF561525 | Transcribed locus | --- | 2.148  | 0.036 | 0.766 | 0.126 | 1.292  | 0.028 | 0.559  | 0.010 |
| 1382227_at   | AW533203 | Transcribed locus | --- | 0.328  | 0.036 | 0.199 | 0.000 | 0.404  | 0.075 | 0.234  | 0.001 |
| 1379260_at   | BE115626 | Transcribed locus | --- | 3.375  | 0.036 | 1.139 | 0.447 | 3.749  | 0.042 | 1.699  | 0.370 |
| 1380917_at   | BE109049 | Transcribed locus | --- | 1.447  | 0.036 | 5.866 | 0.001 | 2.939  | 0.007 | 10.359 | 0.001 |
| 1386583_at   | AA859497 | Transcribed locus | --- | 0.530  | 0.036 | 0.860 | 0.010 | 0.513  | 0.016 | 0.916  | 0.789 |
| 1380345_at   | AW529036 | Transcribed locus | --- | 0.507  | 0.036 | 0.375 | 0.002 | 0.392  | 0.178 | 0.573  | 0.155 |
| 1372978_at   | BI291218 | Transcribed locus | --- | 0.496  | 0.036 | 0.761 | 0.381 | 0.456  | 0.019 | 0.699  | 0.355 |
| 1378965_at   | AA818967 | Transcribed locus | --- | 0.503  | 0.036 | 0.342 | 0.001 | 0.425  | 0.020 | 0.457  | 0.015 |
| 1391334_at   | BE106273 | Transcribed locus | --- | 0.353  | 0.037 | 0.312 | 0.135 | 0.344  | 0.040 | 0.793  | 0.135 |
| 1391582_at   | AI180053 | Transcribed locus | --- | 1.813  | 0.037 | 1.690 | 0.149 | 1.096  | 0.312 | 1.019  | 0.796 |
| 1392149_at   | AA997766 | Transcribed locus | --- | 0.686  | 0.037 | 1.096 | 0.992 | 0.728  | 0.210 | 0.523  | 0.093 |
| 1376463_at   | AA955579 | Transcribed locus | --- | 0.243  | 0.037 | 0.062 | 0.000 | 0.179  | 0.019 | 0.057  | 0.000 |
| 1389635_at   | BE120878 | Transcribed locus | --- | 0.849  | 0.037 | 0.724 | 0.004 | 0.743  | 0.040 | 0.811  | 0.253 |
| 1388881_at   | BG380656 | Transcribed locus | --- | 0.400  | 0.037 | 0.618 | 0.037 | 0.305  | 0.035 | 0.628  | 0.022 |
| 1382098_at   | AI228756 | Transcribed locus | --- | 0.446  | 0.037 | 0.040 | 0.000 | 0.521  | 0.009 | 0.152  | 0.010 |
| 1381386_at   | AI407297 | Transcribed locus | --- | 0.232  | 0.037 | 0.660 | 0.195 | 0.394  | 0.004 | 0.529  | 0.354 |
| 1396775_at   | BF403583 | Transcribed locus | --- | 1.674  | 0.037 | 0.847 | 0.796 | 1.509  | 0.052 | 0.563  | 0.198 |
| 1380741_at   | BF412788 | Transcribed locus | --- | 0.218  | 0.037 | 0.097 | 0.000 | 0.157  | 0.000 | 0.144  | 0.011 |
| 1374329_at   | BI286364 | Transcribed locus | --- | 0.578  | 0.038 | 0.475 | 0.007 | 0.425  | 0.010 | 0.369  | 0.025 |
| 1389301_at   | AI176665 | Transcribed locus | --- | 0.575  | 0.038 | 0.482 | 0.000 | 0.568  | 0.003 | 0.644  | 0.003 |
| 1391197_at   | BF399523 | Transcribed locus | --- | 2.226  | 0.038 | 1.209 | 0.444 | 1.466  | 0.360 | 1.158  | 0.993 |
| 1377909_at   | BF401445 | Transcribed locus | --- | 1.312  | 0.038 | 0.586 | 0.038 | 1.355  | 0.376 | 1.376  | 0.974 |
| 1392844_at   | BE119432 | Transcribed locus | --- | 1.507  | 0.038 | 2.651 | 0.007 | 1.882  | 0.214 | 1.907  | 0.030 |
| 1389388_at   | BF291161 | Transcribed locus | --- | 0.378  | 0.038 | 0.344 | 0.000 | 0.450  | 0.274 | 0.490  | 0.012 |
| 1373922_at   | BG377024 | Transcribed locus | --- | 2.221  | 0.038 | 2.006 | 0.000 | 1.338  | 0.394 | 1.603  | 0.127 |
| 1398464_at   | AI575255 | Transcribed locus | --- | 3.867  | 0.038 | 2.368 | 0.025 | 3.243  | 0.002 | 2.082  | 0.092 |
| 1386063_at   | BF559746 | Transcribed locus | --- | 2.492  | 0.038 | 1.552 | 0.135 | 1.864  | 0.070 | 1.002  | 0.227 |
| 1372197_at   | BI299775 | Transcribed locus | --- | 0.764  | 0.038 | 0.948 | 0.454 | 1.490  | 0.318 | 1.082  | 0.454 |
| 1382480_at   | AI060139 | Transcribed locus | --- | 0.705  | 0.038 | 1.012 | 0.365 | 0.702  | 0.026 | 0.948  | 0.156 |
| 1373050_at   | AW917731 | Transcribed locus | --- | 2.362  | 0.038 | 0.646 | 0.465 | 3.570  | 0.001 | 0.526  | 0.519 |
| 1381626_at   | BE105470 | Transcribed locus | --- | 0.508  | 0.039 | 1.033 | 0.936 | 0.521  | 0.032 | 0.990  | 0.961 |
| 1389789_at   | AI059662 | Transcribed locus | --- | 4.395  | 0.039 | 0.916 | 0.427 | 5.849  | 0.004 | 1.465  | 0.045 |
| 1374473_at   | BI282910 | Transcribed locus | --- | 1.497  | 0.039 | 1.191 | 0.001 | 1.045  | 0.558 | 1.220  | 0.002 |
| 1373217_at   | AI010234 | Transcribed locus | --- | 1.330  | 0.039 | 0.978 | 0.783 | 1.015  | 0.383 | 0.825  | 0.174 |
| 1372951_at   | BI274172 | Transcribed locus | --- | 1.891  | 0.039 | 2.487 | 0.005 | 1.959  | 0.009 | 2.462  | 0.001 |
| 1393822_at   | AA925789 | Transcribed locus | --- | 11.771 | 0.039 | 4.783 | 0.024 | 9.231  | 0.049 | 4.810  | 0.007 |
| 1388702_at   | BI285078 | Transcribed locus | --- | 0.589  | 0.039 | 0.591 | 0.082 | 0.715  | 0.424 | 0.648  | 0.006 |
| 1377019_at   | BF410042 | Transcribed locus | --- | 0.590  | 0.039 | 0.999 | 0.773 | 0.588  | 0.032 | 1.145  | 0.116 |
| 1372910_at   | AI408770 | Transcribed locus | --- | 1.388  | 0.039 | 1.149 | 0.051 | 2.311  | 0.006 | 1.469  | 0.026 |
| 1377413_at   | BF548480 | Transcribed locus | --- | 1.554  | 0.039 | 1.369 | 0.025 | 1.382  | 0.051 | 1.526  | 0.009 |
| 1390240_at   | BM389611 | Transcribed locus | --- | 13.310 | 0.040 | 5.801 | 0.027 | 11.773 | 0.016 | 3.957  | 0.145 |
| 1398619_at   | BG671918 | Transcribed locus | --- | 1.567  | 0.040 | 0.806 | 0.031 | 1.969  | 0.027 | 0.754  | 0.131 |
| 1377167_at   | AA964494 | Transcribed locus | --- | 1.147  | 0.040 | 0.713 | 0.076 | 1.487  | 0.048 | 1.033  | 0.196 |
| 1374158_at   | BF398160 | Transcribed locus | --- | 1.751  | 0.040 | 1.027 | 0.759 | 1.686  | 0.021 | 1.102  | 0.713 |
| 1382867_at   | AA849390 | Transcribed locus | --- | 2.437  | 0.041 | 0.593 | 0.158 | 1.648  | 0.035 | 0.786  | 0.145 |
| 1395110_at   | BE110272 | Transcribed locus | --- | 19.822 | 0.041 | 5.927 | 0.012 | 16.509 | 0.000 | 1.889  | 0.019 |
| 1384451_at   | BE116574 | Transcribed locus | --- | 2.007  | 0.041 | 0.995 | 0.683 | 2.426  | 0.045 | 1.036  | 0.803 |
| 1385355_at   | BF391308 | Transcribed locus | --- | 1.492  | 0.042 | 1.152 | 0.759 | 2.003  | 0.142 | 0.956  | 0.924 |
| 1381508_at   | BE098143 | Transcribed locus | --- | 0.805  | 0.042 | 2.182 | 0.067 | 0.801  | 0.038 | 1.134  | 0.317 |
| 1371818_at   | AW251204 | Transcribed locus | --- | 0.662  | 0.042 | 1.036 | 0.878 | 0.513  | 0.014 | 1.075  | 0.568 |
| 1384520_at   | AW523106 | Transcribed locus | --- | 0.754  | 0.042 | 0.619 | 0.057 | 0.586  | 0.014 | 0.743  | 0.120 |
| 1390303_at   | BF390840 | Transcribed locus | --- | 0.425  | 0.042 | 0.219 | 0.005 | 0.697  | 0.466 | 0.401  | 0.039 |
| 1372889_at   | AI407489 | Transcribed locus | --- | 2.165  | 0.042 | 0.329 | 0.049 | 1.044  | 0.659 | 0.329  | 0.049 |
| 1379997_at   | BF398462 | Transcribed locus | --- | 2.164  | 0.042 | 0.986 | 0.615 | 1.097  | 0.962 | 1.143  | 0.508 |
| 1390509_a_at | BI294860 | Transcribed locus | --- | 0.666  | 0.042 | 0.604 | 0.003 | 0.562  | 0.037 | 0.652  | 0.001 |

|            |          |                   |     |       |       |        |       |       |       |        |       |
|------------|----------|-------------------|-----|-------|-------|--------|-------|-------|-------|--------|-------|
| 1375363_at | BG374402 | Transcribed locus | --- | 1.678 | 0.042 | 0.970  | 0.804 | 1.180 | 0.222 | 0.895  | 0.710 |
| 1393972_at | BE096871 | Transcribed locus | --- | 2.403 | 0.042 | 0.905  | 0.273 | 1.662 | 0.464 | 1.416  | 0.120 |
| 1393730_at | BI277836 | Transcribed locus | --- | 5.026 | 0.042 | 2.221  | 0.223 | 3.787 | 0.170 | 1.536  | 0.927 |
| 1389383_at | BI289855 | Transcribed locus | --- | 1.843 | 0.042 | 0.619  | 0.001 | 3.237 | 0.014 | 0.755  | 0.047 |
| 1392493_at | AI501338 | Transcribed locus | --- | 1.603 | 0.042 | 1.102  | 0.077 | 1.512 | 0.062 | 1.273  | 0.165 |
| 1377272_at | BE112934 | Transcribed locus | --- | 0.513 | 0.042 | 1.195  | 0.139 | 0.389 | 0.037 | 0.942  | 0.306 |
| 1379535_at | AI073064 | Transcribed locus | --- | 2.029 | 0.043 | 1.480  | 0.030 | 2.646 | 0.015 | 1.367  | 0.036 |
| 1396088_at | AW914780 | Transcribed locus | --- | 2.910 | 0.043 | 1.924  | 0.053 | 2.386 | 0.073 | 1.030  | 0.072 |
| 1382334_at | AI170308 | Transcribed locus | --- | 1.946 | 0.043 | 1.879  | 0.444 | 2.812 | 0.031 | 1.647  | 0.408 |
| 1382814_at | AW521702 | Transcribed locus | --- | 0.949 | 0.043 | 0.238  | 0.001 | 0.959 | 0.261 | 0.255  | 0.005 |
| 1385929_at | AI171447 | Transcribed locus | --- | 0.613 | 0.043 | 0.534  | 0.036 | 0.345 | 0.010 | 1.151  | 0.585 |
| 1385098_at | AW526343 | Transcribed locus | --- | 0.640 | 0.043 | 0.099  | 0.002 | 0.529 | 0.078 | 0.117  | 0.002 |
| 1392924_at | BG371591 | Transcribed locus | --- | 0.675 | 0.043 | 0.590  | 0.001 | 0.660 | 0.025 | 0.659  | 0.026 |
| 1395183_at | BM391096 | Transcribed locus | --- | 2.008 | 0.043 | 39.509 | 0.003 | 0.550 | 0.530 | 30.352 | 0.001 |
| 1378367_at | BF389087 | Transcribed locus | --- | 0.737 | 0.043 | 0.376  | 0.007 | 1.173 | 0.513 | 0.522  | 0.044 |
| 1392492_at | AA956982 | Transcribed locus | --- | 1.698 | 0.043 | 1.118  | 0.694 | 1.554 | 0.077 | 0.952  | 0.817 |
| 1374485_at | AI137762 | Transcribed locus | --- | 1.491 | 0.043 | 0.698  | 0.487 | 1.526 | 0.062 | 0.862  | 0.251 |
| 1374553_at | AW535229 | Transcribed locus | --- | 0.693 | 0.043 | 0.893  | 0.216 | 0.786 | 0.002 | 0.764  | 0.017 |
| 1389230_at | AA818910 | Transcribed locus | --- | 1.181 | 0.043 | 2.104  | 0.023 | 0.832 | 0.372 | 2.199  | 0.053 |
| 1383362_at | BI275850 | Transcribed locus | --- | 3.174 | 0.043 | 1.364  | 0.291 | 3.751 | 0.045 | 1.592  | 0.008 |
| 1382854_at | AI232286 | Transcribed locus | --- | 1.787 | 0.044 | 1.072  | 0.666 | 1.006 | 0.984 | 1.106  | 0.147 |
| 1384124_at | AW534915 | Transcribed locus | --- | 0.548 | 0.044 | 0.916  | 0.035 | 0.415 | 0.020 | 0.518  | 0.011 |
| 1383907_at | BE117969 | Transcribed locus | --- | 0.736 | 0.044 | 0.484  | 0.000 | 0.928 | 0.637 | 0.724  | 0.062 |
| 1374263_at | BF396108 | Transcribed locus | --- | 2.160 | 0.044 | 1.077  | 0.227 | 4.703 | 0.021 | 1.798  | 1.000 |
| 1396405_at | BE097557 | Transcribed locus | --- | 0.658 | 0.044 | 0.254  | 0.000 | 0.890 | 0.706 | 0.353  | 0.004 |
| 1390996_at | BE101679 | Transcribed locus | --- | 1.539 | 0.044 | 1.018  | 0.942 | 0.980 | 0.764 | 1.154  | 0.105 |
| 1384948_at | AI113157 | Transcribed locus | --- | 1.537 | 0.044 | 0.753  | 0.074 | 1.561 | 0.021 | 0.779  | 0.135 |
| 1376808_at | BG672572 | Transcribed locus | --- | 0.644 | 0.044 | 0.204  | 0.001 | 0.534 | 0.079 | 0.321  | 0.018 |
| 1382506_at | AI044841 | Transcribed locus | --- | 3.615 | 0.044 | 0.593  | 0.202 | 2.927 | 0.018 | 0.775  | 0.084 |
| 1374241_at | AI406271 | Transcribed locus | --- | 0.408 | 0.044 | 0.286  | 0.003 | 0.265 | 0.000 | 0.289  | 0.005 |
| 1394169_at | AI639265 | Transcribed locus | --- | 0.693 | 0.045 | 0.293  | 0.002 | 0.691 | 0.087 | 0.347  | 0.061 |
| 1391480_at | BI296013 | Transcribed locus | --- | 0.668 | 0.045 | 0.601  | 0.140 | 0.672 | 0.043 | 0.598  | 0.139 |
| 1396967_at | BF406294 | Transcribed locus | --- | 0.718 | 0.045 | 0.498  | 0.105 | 0.721 | 0.045 | 0.513  | 0.108 |
| 1376814_at | BE107949 | Transcribed locus | --- | 0.363 | 0.045 | 0.318  | 0.004 | 0.575 | 0.036 | 0.526  | 0.036 |
| 1391241_at | BF394755 | Transcribed locus | --- | 2.505 | 0.045 | 0.544  | 0.417 | 3.400 | 0.026 | 0.989  | 0.977 |
| 1398985_at | AI716480 | Transcribed locus | --- | 3.421 | 0.045 | 0.952  | 0.139 | 4.062 | 0.012 | 1.574  | 0.034 |
| 1391610_at | AI555319 | Transcribed locus | --- | 0.827 | 0.045 | 0.956  | 0.960 | 1.510 | 0.161 | 0.990  | 0.570 |
| 1391744_at | AI548028 | Transcribed locus | --- | 0.308 | 0.045 | 0.319  | 0.073 | 0.459 | 0.090 | 0.165  | 0.043 |
| 1393765_at | AI043706 | Transcribed locus | --- | 0.399 | 0.045 | 0.415  | 0.000 | 0.808 | 0.220 | 0.500  | 0.008 |
| 1379244_at | AW522926 | Transcribed locus | --- | 2.815 | 0.045 | 1.273  | 0.120 | 2.426 | 0.078 | 1.001  | 0.995 |
| 1372875_at | AI408520 | Transcribed locus | --- | 1.778 | 0.045 | 1.438  | 0.039 | 1.428 | 0.075 | 1.310  | 0.092 |
| 1394342_at | BF557463 | Transcribed locus | --- | 2.215 | 0.046 | 1.001  | 0.721 | 0.623 | 0.886 | 0.751  | 0.045 |
| 1383378_at | BI298932 | Transcribed locus | --- | 0.432 | 0.046 | 0.634  | 0.086 | 0.318 | 0.040 | 0.586  | 0.178 |
| 1373633_at | BF399791 | Transcribed locus | --- | 2.043 | 0.046 | 2.055  | 0.166 | 1.286 | 0.311 | 1.143  | 0.683 |
| 1372564_at | AI411375 | Transcribed locus | --- | 1.632 | 0.047 | 1.454  | 0.038 | 1.356 | 0.189 | 1.390  | 0.034 |
| 1374868_at | AW535434 | Transcribed locus | --- | 1.461 | 0.047 | 1.187  | 0.100 | 1.550 | 0.035 | 0.891  | 0.929 |
| 1377688_at | AI136703 | Transcribed locus | --- | 2.304 | 0.047 | 1.425  | 0.159 | 2.032 | 0.146 | 0.978  | 0.418 |
| 1390394_at | AW251900 | Transcribed locus | --- | 1.443 | 0.047 | 1.451  | 0.004 | 1.796 | 0.000 | 1.535  | 0.057 |
| 1393021_at | BE113061 | Transcribed locus | --- | 0.422 | 0.047 | 0.704  | 0.015 | 0.637 | 0.180 | 0.667  | 0.023 |
| 1372371_at | BI303031 | Transcribed locus | --- | 2.125 | 0.047 | 1.031  | 0.966 | 2.344 | 0.032 | 1.409  | 0.218 |
| 1393928_at | AA899202 | Transcribed locus | --- | 1.953 | 0.047 | 2.366  | 0.052 | 2.254 | 0.544 | 2.179  | 0.019 |
| 1398902_at | BF282978 | Transcribed locus | --- | 0.689 | 0.047 | 1.607  | 0.012 | 0.477 | 0.007 | 1.333  | 0.119 |
| 1378937_at | BE349836 | Transcribed locus | --- | 0.445 | 0.047 | 0.934  | 0.708 | 0.635 | 0.000 | 0.984  | 0.588 |
| 1377890_at | AI411360 | Transcribed locus | --- | 0.619 | 0.047 | 0.333  | 0.009 | 0.590 | 0.046 | 0.329  | 0.003 |
| 1379358_at | BE108208 | Transcribed locus | --- | 1.323 | 0.047 | 1.323  | 0.682 | 3.092 | 0.027 | 1.321  | 0.295 |
| 1392733_at | BM391545 | Transcribed locus | --- | 2.209 | 0.047 | 3.164  | 0.011 | 1.792 | 0.019 | 5.558  | 0.009 |
| 1373516_at | BE099830 | Transcribed locus | --- | 0.761 | 0.048 | 0.663  | 0.054 | 0.445 | 0.030 | 0.743  | 0.250 |
| 1372452_at | BG666882 | Transcribed locus | --- | 0.657 | 0.048 | 0.712  | 0.047 | 0.393 | 0.006 | 0.580  | 0.056 |
| 1391292_at | AI556811 | Transcribed locus | --- | 0.440 | 0.048 | 0.732  | 0.016 | 0.390 | 0.003 | 0.647  | 0.051 |
| 1377500_at | BE119198 | Transcribed locus | --- | 1.629 | 0.048 | 1.836  | 0.083 | 1.118 | 0.218 | 1.568  | 0.015 |
| 1383417_at | BE119990 | Transcribed locus | --- | 0.539 | 0.048 | 1.060  | 0.819 | 0.529 | 0.080 | 0.908  | 0.682 |



|              |          |                   |     |       |       |       |       |       |       |       |       |
|--------------|----------|-------------------|-----|-------|-------|-------|-------|-------|-------|-------|-------|
| 1372204_at   | BM391843 | Transcribed locus | --- | 1.748 | 0.048 | 1.492 | 0.042 | 2.129 | 0.018 | 1.865 | 0.004 |
| 1392692_at   | BE107050 | Transcribed locus | --- | 1.254 | 0.048 | 0.754 | 0.225 | 1.406 | 0.035 | 0.880 | 0.673 |
| 1393465_at   | BE103258 | Transcribed locus | --- | 0.697 | 0.048 | 0.972 | 0.763 | 0.554 | 0.013 | 0.661 | 0.038 |
| 1382071_at   | BI302916 | Transcribed locus | --- | 1.238 | 0.048 | 1.162 | 0.456 | 1.271 | 0.073 | 1.125 | 0.314 |
| 1379076_at   | BE328961 | Transcribed locus | --- | 0.606 | 0.048 | 0.233 | 0.000 | 0.664 | 0.515 | 0.376 | 0.054 |
| 1377202_at   | AI172197 | Transcribed locus | --- | 0.673 | 0.049 | 0.404 | 0.007 | 1.045 | 0.984 | 0.462 | 0.041 |
| 1379994_at   | AI070694 | Transcribed locus | --- | 1.539 | 0.049 | 0.852 | 0.502 | 1.340 | 0.022 | 1.036 | 0.754 |
| 1375272_at   | BE113423 | Transcribed locus | --- | 1.147 | 0.049 | 1.279 | 0.043 | 1.232 | 0.023 | 1.177 | 0.086 |
| 1372768_at   | AW251331 | Transcribed locus | --- | 0.762 | 0.049 | 0.689 | 0.014 | 0.729 | 0.106 | 0.699 | 0.003 |
| 1382300_at   | BF284236 | Transcribed locus | --- | 0.639 | 0.049 | 1.059 | 0.922 | 0.856 | 0.896 | 1.127 | 0.115 |
| 1393600_at   | AA817969 | Transcribed locus | --- | 0.692 | 0.049 | 0.411 | 0.020 | 0.689 | 0.045 | 0.761 | 0.072 |
| 1378316_at   | AI145009 | Transcribed locus | --- | 0.528 | 0.049 | 0.879 | 0.242 | 0.773 | 0.460 | 0.930 | 0.134 |
| 1372276_at   | BG378613 | Transcribed locus | --- | 0.461 | 0.050 | 0.390 | 0.020 | 0.478 | 0.076 | 0.412 | 0.064 |
| 1382183_at   | AA849479 | Transcribed locus | --- | 0.379 | 0.050 | 0.219 | 0.001 | 0.404 | 0.053 | 0.408 | 0.038 |
| 1383750_at   | BF418523 | Transcribed locus | --- | 0.425 | 0.050 | 0.108 | 0.000 | 0.684 | 0.000 | 0.217 | 0.025 |
| 1376691_at   | AI103213 | Transcribed locus | --- | 0.194 | 0.050 | 0.579 | 0.009 | 0.447 | 0.015 | 0.433 | 0.022 |
| 1389591_at   | BM388471 | Transcribed locus | --- | 1.639 | 0.050 | 1.730 | 0.068 | 1.134 | 0.910 | 1.213 | 0.989 |
| 1391860_at   | AI599816 | Transcribed locus | --- | 1.336 | 0.050 | 1.185 | 0.151 | 1.272 | 0.406 | 0.998 | 0.919 |
| 1382654_at   | AA859319 | Transcribed locus | --- | 0.664 | 0.050 | 0.418 | 0.006 | 0.512 | 0.033 | 0.427 | 0.020 |
| 1391817_at   | AA901178 | Transcribed locus | --- | 2.260 | 0.050 | 2.422 | 0.002 | 3.259 | 0.032 | 1.598 | 0.039 |
| 1393019_at   | BG372243 | Transcribed locus | --- | 0.746 | 0.050 | 0.589 | 0.007 | 0.897 | 0.463 | 0.758 | 0.002 |
| 1379302_at   | AA848916 | Transcribed locus | --- | 1.214 | 0.050 | 1.638 | 0.118 | 0.904 | 0.830 | 0.950 | 0.543 |
| 1379324_at   | AW535283 | Transcribed locus | --- | 0.568 | 0.051 | 0.666 | 0.045 | 0.378 | 0.000 | 0.658 | 0.012 |
| 1390410_at   | AA963369 | Transcribed locus | --- | 0.866 | 0.051 | 0.846 | 0.196 | 0.786 | 0.211 | 0.866 | 0.040 |
| 1374265_at   | BF395101 | Transcribed locus | --- | 1.969 | 0.051 | 1.744 | 0.024 | 2.822 | 0.062 | 1.504 | 0.046 |
| 1375635_at   | AI406410 | Transcribed locus | --- | 3.714 | 0.051 | 0.856 | 0.014 | 4.344 | 0.036 | 1.167 | 0.167 |
| 1375437_at   | BI298111 | Transcribed locus | --- | 0.777 | 0.051 | 0.924 | 0.039 | 0.776 | 0.064 | 0.610 | 0.008 |
| 1393937_at   | AI577369 | Transcribed locus | --- | 0.884 | 0.051 | 0.399 | 0.002 | 0.922 | 0.540 | 0.543 | 0.048 |
| 1373078_at   | AI409271 | Transcribed locus | --- | 0.661 | 0.051 | 0.463 | 0.004 | 0.611 | 0.032 | 0.485 | 0.004 |
| 1383102_at   | BE111057 | Transcribed locus | --- | 1.249 | 0.051 | 0.861 | 0.506 | 1.422 | 0.143 | 1.292 | 0.210 |
| 1373091_at   | AI102576 | Transcribed locus | --- | 1.464 | 0.051 | 0.689 | 0.420 | 1.742 | 0.186 | 1.022 | 0.214 |
| 1391220_at   | BG381455 | Transcribed locus | --- | 0.718 | 0.051 | 1.248 | 0.072 | 0.605 | 0.026 | 1.254 | 0.043 |
| 1377312_at   | BF401679 | Transcribed locus | --- | 0.655 | 0.051 | 0.769 | 0.052 | 0.708 | 0.589 | 0.769 | 0.048 |
| 1391863_at   | BE106361 | Transcribed locus | --- | 1.330 | 0.051 | 0.994 | 0.957 | 1.074 | 0.447 | 0.999 | 0.374 |
| 1393308_at   | BE110640 | Transcribed locus | --- | 0.601 | 0.051 | 0.779 | 0.236 | 0.715 | 0.838 | 0.837 | 0.093 |
| 1385350_at   | BF398122 | Transcribed locus | --- | 0.685 | 0.052 | 1.229 | 0.540 | 0.545 | 0.051 | 1.407 | 0.707 |
| 1392849_at   | AI044509 | Transcribed locus | --- | 1.087 | 0.052 | 1.035 | 0.581 | 1.548 | 0.123 | 0.999 | 0.895 |
| 1383022_at   | BF390046 | Transcribed locus | --- | 1.268 | 0.052 | 0.423 | 0.016 | 0.729 | 0.038 | 0.611 | 0.041 |
| 1371494_at   | BE110614 | Transcribed locus | --- | 0.365 | 0.052 | 0.133 | 0.001 | 0.565 | 0.039 | 0.201 | 0.029 |
| 1372027_at   | AI009713 | Transcribed locus | --- | 1.477 | 0.052 | 1.112 | 0.765 | 1.112 | 0.391 | 0.927 | 0.910 |
| 1377469_at   | AI103161 | Transcribed locus | --- | 0.375 | 0.052 | 0.207 | 0.003 | 0.335 | 0.032 | 0.465 | 0.016 |
| 1385717_at   | AW524331 | Transcribed locus | --- | 0.437 | 0.052 | 0.397 | 0.000 | 0.518 | 0.015 | 0.553 | 0.018 |
| 1398495_at   | BE121436 | Transcribed locus | --- | 0.747 | 0.052 | 0.461 | 0.086 | 0.476 | 0.016 | 0.322 | 0.071 |
| 1377154_at   | BI295766 | Transcribed locus | --- | 1.724 | 0.052 | 0.690 | 0.265 | 1.183 | 0.685 | 0.689 | 0.265 |
| 1373113_at   | AI231778 | Transcribed locus | --- | 1.506 | 0.053 | 1.722 | 0.000 | 1.224 | 0.296 | 1.574 | 0.010 |
| 1378396_at   | AI007647 | Transcribed locus | --- | 0.725 | 0.053 | 0.589 | 0.060 | 0.925 | 0.652 | 0.588 | 0.023 |
| 1398397_at   | AI407483 | Transcribed locus | --- | 1.799 | 0.053 | 1.521 | 0.807 | 4.682 | 0.001 | 1.810 | 0.990 |
| 1372838_at   | AI227902 | Transcribed locus | --- | 0.701 | 0.053 | 0.684 | 0.143 | 0.787 | 0.056 | 0.689 | 0.106 |
| 1375843_at   | BM383777 | Transcribed locus | --- | 0.765 | 0.053 | 0.636 | 0.001 | 0.919 | 0.291 | 0.685 | 0.021 |
| 1392531_at   | AI178693 | Transcribed locus | --- | 1.905 | 0.053 | 2.304 | 0.014 | 1.649 | 0.031 | 2.091 | 0.013 |
| 1392217_at   | AI172126 | Transcribed locus | --- | 0.280 | 0.053 | 0.268 | 0.000 | 0.354 | 0.034 | 0.208 | 0.008 |
| 1385253_at   | AW529791 | Transcribed locus | --- | 1.471 | 0.053 | 2.010 | 0.017 | 2.151 | 0.030 | 1.431 | 0.067 |
| 1393143_at   | AI045866 | Transcribed locus | --- | 1.449 | 0.054 | 0.712 | 0.016 | 1.917 | 0.071 | 1.053 | 0.649 |
| 1380298_at   | AW435308 | Transcribed locus | --- | 0.834 | 0.054 | 0.999 | 0.995 | 0.846 | 0.076 | 1.002 | 0.955 |
| 1393817_at   | AI070991 | Transcribed locus | --- | 1.328 | 0.054 | 0.915 | 0.263 | 1.566 | 0.101 | 1.206 | 0.124 |
| 1393777_at   | AA998104 | Transcribed locus | --- | 0.255 | 0.054 | 0.797 | 0.530 | 0.586 | 0.219 | 0.960 | 0.395 |
| 1393344_at   | AW528051 | Transcribed locus | --- | 0.676 | 0.054 | 0.335 | 0.017 | 0.780 | 0.230 | 0.225 | 0.034 |
| 1377040_a_at | AI172225 | Transcribed locus | --- | 0.573 | 0.054 | 0.902 | 0.974 | 0.520 | 0.019 | 0.769 | 0.074 |
| 1376660_at   | BG672127 | Transcribed locus | --- | 0.689 | 0.054 | 2.635 | 0.003 | 0.998 | 0.993 | 1.988 | 0.004 |
| 1374035_at   | BI296482 | Transcribed locus | --- | 0.168 | 0.055 | 0.141 | 0.005 | 0.137 | 0.001 | 0.126 | 0.037 |
| 1379698_at   | AI178631 | Transcribed locus | --- | 0.444 | 0.055 | 0.260 | 0.001 | 0.314 | 0.033 | 0.381 | 0.047 |

|            |          |                   |     |       |       |       |       |       |       |       |       |
|------------|----------|-------------------|-----|-------|-------|-------|-------|-------|-------|-------|-------|
| 1392500_at | AA957990 | Transcribed locus | --- | 1.518 | 0.055 | 0.867 | 0.315 | 1.440 | 0.053 | 0.961 | 0.310 |
| 1398389_at | AI236136 | Transcribed locus | --- | 0.719 | 0.055 | 0.441 | 0.001 | 0.717 | 0.003 | 0.517 | 0.011 |
| 1378998_at | AI071538 | Transcribed locus | --- | 0.723 | 0.055 | 0.934 | 0.931 | 0.781 | 0.102 | 1.048 | 0.974 |
| 1391077_at | AA851257 | Transcribed locus | --- | 0.253 | 0.055 | 0.696 | 0.126 | 0.252 | 0.049 | 0.538 | 0.005 |
| 1389205_at | AI012582 | Transcribed locus | --- | 1.094 | 0.055 | 0.908 | 0.342 | 2.349 | 0.004 | 1.028 | 0.661 |
| 1376167_at | AA799347 | Transcribed locus | --- | 0.609 | 0.055 | 0.648 | 0.127 | 0.642 | 0.224 | 0.782 | 0.228 |
| 1381795_at | AA963295 | Transcribed locus | --- | 1.787 | 0.056 | 1.206 | 0.274 | 2.206 | 0.001 | 1.272 | 0.122 |
| 1399061_at | H35275   | Transcribed locus | --- | 0.728 | 0.056 | 0.763 | 0.010 | 0.764 | 0.586 | 0.913 | 0.167 |
| 1388830_at | BM390687 | Transcribed locus | --- | 1.873 | 0.056 | 1.236 | 0.039 | 1.885 | 0.006 | 1.439 | 0.008 |
| 1390530_at | AI169239 | Transcribed locus | --- | 0.473 | 0.056 | 0.392 | 0.012 | 0.661 | 0.028 | 0.370 | 0.024 |
| 1393077_at | AA925179 | Transcribed locus | --- | 0.839 | 0.056 | 0.703 | 0.011 | 0.665 | 0.017 | 0.713 | 0.005 |
| 1396236_at | AI145896 | Transcribed locus | --- | 1.413 | 0.056 | 1.001 | 0.997 | 1.411 | 0.053 | 0.996 | 0.901 |
| 1379619_at | BE104952 | Transcribed locus | --- | 1.512 | 0.057 | 1.385 | 0.090 | 1.201 | 0.246 | 0.902 | 0.628 |
| 1376232_at | AW521352 | Transcribed locus | --- | 1.766 | 0.057 | 0.740 | 0.287 | 2.650 | 0.004 | 0.761 | 0.042 |
| 1372821_at | AI236621 | Transcribed locus | --- | 0.268 | 0.057 | 0.613 | 0.376 | 0.495 | 0.033 | 0.812 | 0.421 |
| 1377076_at | AI716131 | Transcribed locus | --- | 0.511 | 0.057 | 0.694 | 0.004 | 0.667 | 0.129 | 0.566 | 0.062 |
| 1380158_at | BF284973 | Transcribed locus | --- | 1.682 | 0.057 | 1.144 | 0.335 | 1.589 | 0.020 | 1.792 | 0.012 |
| 1378357_at | AI556522 | Transcribed locus | --- | 0.457 | 0.057 | 0.828 | 0.620 | 0.535 | 0.026 | 0.456 | 0.186 |
| 1384135_at | AI575629 | Transcribed locus | --- | 1.533 | 0.058 | 0.735 | 0.486 | 1.976 | 0.723 | 0.698 | 0.316 |
| 1389293_at | BM390250 | Transcribed locus | --- | 0.496 | 0.058 | 0.584 | 0.009 | 0.930 | 0.517 | 0.770 | 0.075 |
| 1380947_at | BE108752 | Transcribed locus | --- | 0.764 | 0.058 | 0.670 | 0.009 | 0.440 | 0.001 | 0.259 | 0.043 |
| 1381551_at | BG378461 | Transcribed locus | --- | 2.993 | 0.058 | 1.824 | 0.499 | 2.240 | 0.272 | 2.445 | 0.460 |
| 1377331_at | AW532469 | Transcribed locus | --- | 0.656 | 0.058 | 0.623 | 0.006 | 0.695 | 0.048 | 0.768 | 0.008 |
| 1374270_at | AA964789 | Transcribed locus | --- | 0.230 | 0.058 | 0.281 | 0.047 | 0.286 | 0.077 | 0.274 | 0.046 |
| 1388472_at | AI177860 | Transcribed locus | --- | 1.363 | 0.058 | 0.933 | 0.365 | 1.603 | 0.113 | 0.998 | 0.792 |
| 1396483_at | AW434740 | Transcribed locus | --- | 0.777 | 0.058 | 0.925 | 0.452 | 0.933 | 0.321 | 1.223 | 0.749 |
| 1376631_at | BF283675 | Transcribed locus | --- | 1.255 | 0.059 | 1.060 | 0.231 | 0.985 | 0.900 | 1.007 | 0.960 |
| 1372736_at | BG374196 | Transcribed locus | --- | 0.313 | 0.059 | 0.244 | 0.007 | 0.252 | 0.001 | 0.246 | 0.014 |
| 1389612_at | AI410941 | Transcribed locus | --- | 0.786 | 0.059 | 0.298 | 0.012 | 0.804 | 0.150 | 0.402 | 0.004 |
| 1372277_at | BI274673 | Transcribed locus | --- | 3.228 | 0.059 | 1.012 | 0.929 | 4.781 | 0.005 | 1.210 | 0.354 |
| 1390986_at | AW526072 | Transcribed locus | --- | 0.486 | 0.059 | 0.213 | 0.000 | 0.367 | 0.044 | 0.233 | 0.000 |
| 1375050_at | BI294558 | Transcribed locus | --- | 0.717 | 0.059 | 1.013 | 0.257 | 0.393 | 0.037 | 0.654 | 0.036 |
| 1373469_at | BF408841 | Transcribed locus | --- | 0.354 | 0.059 | 0.536 | 0.007 | 0.283 | 0.010 | 0.603 | 0.006 |
| 1385533_at | BE106145 | Transcribed locus | --- | 0.579 | 0.059 | 0.803 | 0.440 | 0.885 | 0.213 | 1.022 | 0.386 |
| 1373376_at | BI285979 | Transcribed locus | --- | 0.570 | 0.059 | 0.714 | 0.021 | 0.751 | 0.083 | 0.719 | 0.001 |
| 1397584_at | BF289504 | Transcribed locus | --- | 0.311 | 0.059 | 1.296 | 0.160 | 1.220 | 0.068 | 1.495 | 0.488 |
| 1394207_at | AI236188 | Transcribed locus | --- | 0.439 | 0.059 | 0.121 | 0.001 | 0.746 | 0.435 | 0.187 | 0.033 |
| 1384833_at | AA801117 | Transcribed locus | --- | 0.672 | 0.060 | 1.167 | 0.664 | 0.705 | 0.195 | 0.799 | 0.010 |
| 1383393_at | AA858485 | Transcribed locus | --- | 1.237 | 0.060 | 0.871 | 0.273 | 1.448 | 0.051 | 0.916 | 0.401 |
| 1389318_at | BF282986 | Transcribed locus | --- | 1.375 | 0.060 | 0.690 | 0.019 | 2.133 | 0.001 | 0.950 | 0.231 |
| 1380552_at | AI555855 | Transcribed locus | --- | 7.872 | 0.060 | 1.877 | 0.130 | 8.124 | 0.060 | 6.903 | 0.013 |
| 1396076_at | AW914907 | Transcribed locus | --- | 1.760 | 0.060 | 0.911 | 0.732 | 1.001 | 0.210 | 0.905 | 0.296 |
| 1398484_at | AI070306 | Transcribed locus | --- | 0.776 | 0.060 | 0.285 | 0.001 | 0.669 | 0.057 | 0.315 | 0.001 |
| 1393177_at | AA924403 | Transcribed locus | --- | 2.681 | 0.060 | 1.637 | 0.010 | 4.022 | 0.000 | 1.537 | 0.178 |
| 1372486_at | AI236691 | Transcribed locus | --- | 0.676 | 0.060 | 0.532 | 0.000 | 0.602 | 0.028 | 0.614 | 0.001 |
| 1395625_at | BF415216 | Transcribed locus | --- | 0.607 | 0.061 | 0.586 | 0.002 | 0.630 | 0.012 | 0.625 | 0.105 |
| 1380255_at | AI235931 | Transcribed locus | --- | 0.504 | 0.061 | 0.390 | 0.002 | 0.730 | 0.054 | 0.697 | 0.006 |
| 1389458_at | AW435191 | Transcribed locus | --- | 0.653 | 0.061 | 1.085 | 0.030 | 1.202 | 0.779 | 1.150 | 0.075 |
| 1376002_at | AI406363 | Transcribed locus | --- | 2.069 | 0.061 | 1.018 | 0.393 | 3.862 | 0.008 | 1.838 | 0.330 |
| 1373223_at | AI101361 | Transcribed locus | --- | 1.938 | 0.061 | 0.792 | 0.409 | 2.906 | 0.003 | 3.030 | 0.008 |
| 1373370_at | AI407467 | Transcribed locus | --- | 1.570 | 0.061 | 0.795 | 0.380 | 2.447 | 0.004 | 0.987 | 0.587 |
| 1381077_at | AA996843 | Transcribed locus | --- | 0.524 | 0.061 | 0.258 | 0.002 | 0.520 | 0.051 | 0.249 | 0.011 |
| 1378000_at | AA801075 | Transcribed locus | --- | 0.460 | 0.061 | 0.297 | 0.000 | 0.290 | 0.026 | 0.356 | 0.002 |
| 1374019_at | BF284939 | Transcribed locus | --- | 0.655 | 0.061 | 0.489 | 0.063 | 0.654 | 0.261 | 0.724 | 0.130 |
| 1391210_at | AI175259 | Transcribed locus | --- | 0.471 | 0.061 | 0.484 | 0.060 | 0.516 | 0.967 | 0.410 | 0.049 |
| 1379510_at | BF546306 | Transcribed locus | --- | 1.101 | 0.062 | 1.159 | 0.993 | 1.039 | 0.986 | 1.427 | 0.389 |
| 1393014_at | AA849210 | Transcribed locus | --- | 1.401 | 0.062 | 1.162 | 0.359 | 1.370 | 0.612 | 0.711 | 0.314 |
| 1382368_at | AA943075 | Transcribed locus | --- | 2.066 | 0.062 | 1.080 | 0.438 | 1.223 | 0.505 | 1.636 | 0.048 |
| 1373075_at | BM390707 | Transcribed locus | --- | 1.087 | 0.062 | 1.529 | 0.004 | 1.307 | 0.001 | 1.453 | 0.033 |
| 1375687_at | BE097926 | Transcribed locus | --- | 0.747 | 0.062 | 0.698 | 0.001 | 0.650 | 0.018 | 0.775 | 0.021 |
| 1373309_at | BI281129 | Transcribed locus | --- | 2.044 | 0.062 | 1.368 | 0.115 | 4.596 | 0.001 | 2.014 | 0.003 |

|              |          |                   |     |       |       |        |       |       |       |       |       |
|--------------|----------|-------------------|-----|-------|-------|--------|-------|-------|-------|-------|-------|
| 1393687_at   | BE113870 | Transcribed locus | --- | 1.591 | 0.062 | 0.878  | 0.679 | 1.155 | 0.096 | 1.061 | 0.204 |
| 1385585_at   | AI111674 | Transcribed locus | --- | 1.886 | 0.062 | 2.345  | 0.016 | 1.085 | 0.651 | 1.824 | 0.177 |
| 1378765_at   | BM384731 | Transcribed locus | --- | 1.839 | 0.062 | 0.853  | 0.982 | 2.236 | 0.016 | 1.002 | 0.909 |
| 1375947_at   | AI171856 | Transcribed locus | --- | 0.710 | 0.063 | 0.637  | 0.043 | 0.720 | 0.045 | 0.860 | 0.317 |
| 1372836_at   | AI170399 | Transcribed locus | --- | 0.386 | 0.063 | 0.690  | 0.036 | 0.619 | 0.087 | 0.597 | 0.020 |
| 1383964_at   | AI549551 | Transcribed locus | --- | 0.704 | 0.063 | 0.284  | 0.006 | 0.859 | 0.331 | 0.360 | 0.009 |
| 1385874_at   | AA956418 | Transcribed locus | --- | 1.452 | 0.063 | 0.772  | 0.016 | 1.109 | 0.951 | 0.883 | 0.061 |
| 1376490_at   | BG378933 | Transcribed locus | --- | 1.310 | 0.063 | 2.045  | 0.176 | 0.998 | 0.513 | 0.835 | 0.263 |
| 1390213_at   | BF388763 | Transcribed locus | --- | 1.376 | 0.063 | 0.907  | 0.698 | 1.161 | 0.400 | 0.953 | 0.751 |
| 1389121_at   | AA998771 | Transcribed locus | --- | 0.613 | 0.063 | 0.460  | 0.025 | 0.790 | 0.063 | 0.527 | 0.234 |
| 1390206_at   | AW434946 | Transcribed locus | --- | 0.681 | 0.063 | 0.607  | 0.219 | 1.418 | 0.298 | 0.640 | 0.269 |
| 1394950_at   | AI502833 | Transcribed locus | --- | 3.456 | 0.064 | 4.311  | 0.005 | 2.338 | 0.091 | 1.131 | 0.683 |
| 1378016_at   | BE104462 | Transcribed locus | --- | 1.416 | 0.064 | 0.977  | 0.791 | 1.075 | 0.168 | 1.078 | 0.851 |
| 1380926_at   | AA957632 | Transcribed locus | --- | 1.422 | 0.064 | 2.031  | 0.055 | 1.039 | 0.197 | 1.515 | 0.014 |
| 1397112_at   | BF415784 | Transcribed locus | --- | 1.716 | 0.064 | 1.612  | 0.216 | 1.554 | 0.364 | 0.893 | 0.680 |
| 1395442_at   | BF398196 | Transcribed locus | --- | 1.665 | 0.064 | 1.069  | 0.446 | 1.166 | 0.034 | 0.824 | 0.319 |
| 1395832_at   | AW529599 | Transcribed locus | --- | 1.039 | 0.064 | 0.661  | 0.027 | 1.001 | 0.898 | 0.579 | 0.036 |
| 1398120_at   | AW531770 | Transcribed locus | --- | 0.525 | 0.064 | 1.239  | 0.152 | 0.363 | 0.050 | 1.145 | 0.820 |
| 1383565_at   | BE120852 | Transcribed locus | --- | 1.849 | 0.064 | 0.852  | 0.355 | 1.040 | 0.746 | 0.995 | 0.444 |
| 1393107_at   | BI303078 | Transcribed locus | --- | 1.064 | 0.064 | 0.625  | 0.007 | 1.057 | 0.816 | 0.742 | 0.112 |
| 1379908_at   | BE104836 | Transcribed locus | --- | 2.092 | 0.064 | 1.342  | 0.808 | 2.410 | 0.116 | 1.118 | 0.959 |
| 1382578_at   | AI178173 | Transcribed locus | --- | 0.640 | 0.064 | 1.185  | 0.282 | 0.665 | 0.068 | 1.249 | 0.988 |
| 1374339_at   | BI303362 | Transcribed locus | --- | 0.654 | 0.064 | 0.561  | 0.000 | 0.751 | 0.019 | 0.706 | 0.207 |
| 1392536_at   | AI136839 | Transcribed locus | --- | 1.135 | 0.065 | 1.890  | 0.001 | 0.664 | 0.015 | 1.905 | 0.033 |
| 1389109_at   | AI407351 | Transcribed locus | --- | 1.152 | 0.065 | 1.208  | 0.143 | 2.711 | 0.045 | 1.558 | 0.008 |
| 1374645_at   | AW535233 | Transcribed locus | --- | 1.330 | 0.065 | 0.948  | 0.673 | 0.992 | 0.862 | 0.978 | 0.893 |
| 1373729_at   | BG376772 | Transcribed locus | --- | 0.703 | 0.065 | 0.649  | 0.013 | 0.983 | 0.593 | 0.657 | 0.001 |
| 1374676_at   | AA818911 | Transcribed locus | --- | 1.899 | 0.065 | 0.502  | 0.046 | 3.401 | 0.001 | 0.754 | 0.112 |
| 1373415_at   | AI407050 | Transcribed locus | --- | 1.017 | 0.066 | 0.402  | 0.003 | 1.045 | 0.248 | 0.447 | 0.037 |
| 1379249_at   | AA900400 | Transcribed locus | --- | 1.498 | 0.066 | 1.507  | 0.004 | 1.291 | 0.135 | 1.288 | 0.099 |
| 1384584_at   | AA892774 | Transcribed locus | --- | 2.226 | 0.066 | 2.562  | 0.003 | 1.954 | 0.044 | 2.098 | 0.006 |
| 1380347_at   | AI030806 | Transcribed locus | --- | 0.936 | 0.066 | 0.263  | 0.000 | 0.966 | 0.537 | 0.286 | 0.076 |
| 1396399_at   | AW530442 | Transcribed locus | --- | 2.974 | 0.066 | 1.100  | 0.436 | 2.747 | 0.074 | 0.962 | 0.919 |
| 1383232_at   | AI716944 | Transcribed locus | --- | 0.782 | 0.066 | 0.772  | 0.005 | 0.775 | 0.020 | 0.805 | 0.005 |
| 1382270_at   | BM384387 | Transcribed locus | --- | 0.473 | 0.066 | 0.292  | 0.021 | 0.567 | 0.161 | 0.340 | 0.001 |
| 1397453_at   | BM390792 | Transcribed locus | --- | 1.591 | 0.066 | 0.770  | 0.349 | 2.414 | 0.001 | 1.589 | 0.073 |
| 1394527_at   | AI501679 | Transcribed locus | --- | 2.444 | 0.067 | 1.074  | 0.015 | 3.774 | 0.016 | 1.316 | 0.119 |
| 1374543_at   | AA858791 | Transcribed locus | --- | 2.415 | 0.067 | 1.865  | 0.001 | 2.447 | 0.041 | 2.246 | 0.008 |
| 1383504_at   | AW530604 | Transcribed locus | --- | 0.704 | 0.067 | 0.538  | 0.000 | 0.834 | 0.485 | 0.648 | 0.002 |
| 1395948_at   | BF410644 | Transcribed locus | --- | 0.450 | 0.067 | 0.413  | 0.064 | 0.088 | 0.025 | 0.670 | 0.061 |
| 1380349_at   | BF395595 | Transcribed locus | --- | 0.913 | 0.067 | 0.363  | 0.006 | 0.717 | 0.026 | 0.420 | 0.007 |
| 1379903_at   | AI059853 | Transcribed locus | --- | 0.427 | 0.067 | 0.714  | 0.024 | 0.285 | 0.005 | 0.751 | 0.025 |
| 1378162_at   | AI045884 | Transcribed locus | --- | 2.166 | 0.067 | 2.132  | 0.118 | 1.492 | 0.025 | 2.037 | 0.041 |
| 1378261_at   | BE102806 | Transcribed locus | --- | 5.705 | 0.068 | 32.402 | 0.013 | 1.346 | 0.447 | 4.127 | 0.014 |
| 1381915_at   | AI111735 | Transcribed locus | --- | 1.489 | 0.068 | 2.245  | 0.001 | 1.327 | 0.139 | 1.895 | 0.007 |
| 1392889_at   | AI112294 | Transcribed locus | --- | 1.615 | 0.068 | 0.632  | 0.035 | 1.347 | 0.039 | 0.772 | 0.077 |
| 1381507_at   | BE097981 | Transcribed locus | --- | 2.665 | 0.068 | 0.736  | 0.201 | 1.349 | 0.198 | 0.515 | 0.013 |
| 1397804_at   | BF411294 | Transcribed locus | --- | 1.098 | 0.068 | 1.102  | 0.491 | 1.450 | 0.001 | 1.065 | 0.090 |
| 1374422_at   | BI395803 | Transcribed locus | --- | 1.020 | 0.068 | 0.817  | 0.177 | 1.437 | 0.033 | 0.806 | 0.038 |
| 1375990_a_at | BF284519 | Transcribed locus | --- | 2.173 | 0.069 | 0.938  | 0.439 | 1.465 | 0.831 | 1.219 | 0.874 |
| 1372560_at   | AW522495 | Transcribed locus | --- | 0.569 | 0.069 | 2.511  | 0.023 | 0.583 | 0.079 | 0.971 | 0.042 |
| 1390395_at   | BF284768 | Transcribed locus | --- | 0.854 | 0.069 | 0.772  | 0.082 | 0.970 | 0.726 | 1.297 | 0.014 |
| 1391217_at   | BI289843 | Transcribed locus | --- | 1.272 | 0.069 | 1.100  | 0.901 | 0.814 | 0.529 | 0.722 | 0.031 |
| 1377742_at   | AI170706 | Transcribed locus | --- | 0.824 | 0.069 | 1.074  | 0.372 | 0.960 | 0.584 | 0.959 | 0.214 |
| 1375497_at   | BE107853 | Transcribed locus | --- | 2.019 | 0.069 | 1.034  | 0.331 | 1.029 | 0.866 | 0.873 | 0.326 |
| 1384582_at   | BE107130 | Transcribed locus | --- | 1.239 | 0.070 | 0.987  | 0.067 | 1.712 | 0.013 | 1.155 | 0.272 |
| 1374664_at   | AI235511 | Transcribed locus | --- | 1.824 | 0.070 | 2.614  | 0.009 | 1.201 | 0.445 | 1.791 | 0.029 |
| 1391060_at   | BG371670 | Transcribed locus | --- | 1.521 | 0.070 | 0.845  | 0.313 | 1.717 | 0.067 | 1.206 | 0.874 |
| 1374636_at   | BI298596 | Transcribed locus | --- | 0.842 | 0.070 | 1.427  | 0.001 | 0.605 | 0.135 | 1.206 | 0.008 |
| 1391436_at   | BF283714 | Transcribed locus | --- | 0.379 | 0.070 | 0.205  | 0.000 | 0.713 | 0.368 | 0.404 | 0.006 |
| 1374307_at   | AI236027 | Transcribed locus | --- | 0.702 | 0.070 | 0.294  | 0.001 | 0.556 | 0.032 | 0.263 | 0.018 |

|            |          |                   |     |       |       |       |       |       |       |       |       |
|------------|----------|-------------------|-----|-------|-------|-------|-------|-------|-------|-------|-------|
| 1377883_at | AI717530 | Transcribed locus | --- | 0.551 | 0.070 | 0.162 | 0.005 | 1.069 | 0.429 | 0.661 | 0.019 |
| 1379695_at | AW915505 | Transcribed locus | --- | 1.302 | 0.070 | 0.997 | 0.082 | 4.659 | 0.033 | 1.014 | 0.951 |
| 1378044_at | AA964294 | Transcribed locus | --- | 2.182 | 0.071 | 1.009 | 0.945 | 1.028 | 0.927 | 1.007 | 0.905 |
| 1395726_at | AW143353 | Transcribed locus | --- | 0.300 | 0.071 | 0.208 | 0.000 | 0.463 | 0.023 | 0.183 | 0.016 |
| 1372263_at | BF396485 | Transcribed locus | --- | 1.397 | 0.071 | 3.624 | 0.023 | 0.971 | 0.473 | 1.857 | 0.007 |
| 1378370_at | BF401705 | Transcribed locus | --- | 1.112 | 0.071 | 0.903 | 0.012 | 1.538 | 0.044 | 1.116 | 0.057 |
| 1386653_at | AW917558 | Transcribed locus | --- | 0.387 | 0.071 | 0.305 | 0.011 | 0.522 | 0.030 | 0.301 | 0.024 |
| 1375963_at | BF281523 | Transcribed locus | --- | 1.077 | 0.072 | 1.051 | 0.775 | 1.168 | 0.077 | 1.126 | 0.452 |
| 1379581_at | BI288586 | Transcribed locus | --- | 2.118 | 0.072 | 1.433 | 0.284 | 1.386 | 0.300 | 0.982 | 0.870 |
| 1382352_at | AI030845 | Transcribed locus | --- | 0.383 | 0.072 | 0.391 | 0.007 | 0.532 | 0.003 | 0.302 | 0.007 |
| 1389216_at | AW523499 | Transcribed locus | --- | 1.322 | 0.072 | 1.840 | 0.017 | 1.327 | 0.174 | 2.023 | 0.005 |
| 1386064_at | AI501693 | Transcribed locus | --- | 2.435 | 0.072 | 2.156 | 0.057 | 1.641 | 0.141 | 1.179 | 0.080 |
| 1377071_at | BG375652 | Transcribed locus | --- | 1.278 | 0.072 | 0.296 | 0.005 | 1.454 | 0.411 | 0.322 | 0.004 |
| 1372495_at | BI274679 | Transcribed locus | --- | 2.296 | 0.073 | 0.992 | 0.796 | 1.987 | 0.180 | 1.152 | 0.367 |
| 1390476_at | BE101472 | Transcribed locus | --- | 1.379 | 0.073 | 1.159 | 0.090 | 0.923 | 0.651 | 1.000 | 0.136 |
| 1374610_at | AI599365 | Transcribed locus | --- | 2.616 | 0.073 | 6.795 | 0.004 | 1.136 | 0.800 | 4.832 | 0.005 |
| 1386052_at | BF290410 | Transcribed locus | --- | 2.573 | 0.073 | 0.977 | 0.879 | 1.791 | 0.112 | 0.961 | 0.869 |
| 1373854_at | AI175795 | Transcribed locus | --- | 0.291 | 0.073 | 0.643 | 0.015 | 0.189 | 0.065 | 0.735 | 0.016 |
| 1386035_at | BG381661 | Transcribed locus | --- | 0.758 | 0.073 | 1.074 | 0.613 | 1.555 | 0.226 | 1.117 | 0.198 |
| 1395393_at | BG671174 | Transcribed locus | --- | 0.701 | 0.073 | 0.993 | 0.892 | 0.892 | 0.287 | 0.857 | 0.539 |
| 1379774_at | AI137801 | Transcribed locus | --- | 1.559 | 0.073 | 1.056 | 0.221 | 1.805 | 0.001 | 1.165 | 0.019 |
| 1377005_at | BM390962 | Transcribed locus | --- | 0.496 | 0.074 | 0.231 | 0.006 | 0.628 | 0.043 | 0.355 | 0.008 |
| 1372532_at | BI289477 | Transcribed locus | --- | 0.676 | 0.074 | 2.213 | 0.002 | 0.798 | 0.059 | 2.038 | 0.009 |
| 1375612_at | AA965147 | Transcribed locus | --- | 0.833 | 0.074 | 0.785 | 0.055 | 0.757 | 0.016 | 0.677 | 0.009 |
| 1383723_at | BF418837 | Transcribed locus | --- | 1.753 | 0.074 | 2.025 | 0.015 | 1.017 | 0.111 | 2.081 | 0.041 |
| 1395991_at | BE107556 | Transcribed locus | --- | 0.580 | 0.074 | 0.362 | 0.013 | 0.919 | 0.125 | 0.487 | 0.084 |
| 1397524_at | AA942689 | Transcribed locus | --- | 1.139 | 0.074 | 1.194 | 0.382 | 1.009 | 0.991 | 0.988 | 0.039 |
| 1382240_at | AI029959 | Transcribed locus | --- | 1.320 | 0.075 | 0.534 | 0.008 | 1.426 | 0.121 | 0.631 | 0.038 |
| 1398211_at | BF413560 | Transcribed locus | --- | 1.009 | 0.075 | 0.954 | 0.921 | 1.000 | 0.994 | 1.122 | 0.450 |
| 1398644_at | AI535104 | Transcribed locus | --- | 2.178 | 0.075 | 1.181 | 0.267 | 1.713 | 0.011 | 1.258 | 0.260 |
| 1391338_at | AI603449 | Transcribed locus | --- | 0.557 | 0.075 | 0.532 | 0.000 | 1.048 | 0.217 | 0.518 | 0.000 |
| 1394135_at | AI639109 | Transcribed locus | --- | 1.225 | 0.075 | 0.697 | 0.013 | 0.836 | 0.764 | 0.964 | 0.781 |
| 1395518_at | BF544403 | Transcribed locus | --- | 0.876 | 0.076 | 3.098 | 0.000 | 0.418 | 0.005 | 2.687 | 0.015 |
| 1388758_at | AI009074 | Transcribed locus | --- | 0.654 | 0.076 | 0.431 | 0.002 | 0.709 | 0.106 | 0.646 | 0.010 |
| 1384615_at | AI071319 | Transcribed locus | --- | 0.883 | 0.076 | 0.519 | 0.003 | 0.592 | 0.084 | 0.402 | 0.004 |
| 1372529_at | BE116914 | Transcribed locus | --- | 0.543 | 0.076 | 0.938 | 0.399 | 0.476 | 0.022 | 1.217 | 0.031 |
| 1373524_at | AA946482 | Transcribed locus | --- | 0.531 | 0.076 | 0.324 | 0.010 | 0.757 | 0.446 | 0.596 | 0.021 |
| 1391990_at | BF405569 | Transcribed locus | --- | 2.215 | 0.076 | 0.743 | 0.072 | 1.535 | 0.087 | 0.944 | 0.626 |
| 1382839_at | AI009109 | Transcribed locus | --- | 0.996 | 0.077 | 0.272 | 0.055 | 0.999 | 0.970 | 0.564 | 0.129 |
| 1393824_at | BG377414 | Transcribed locus | --- | 1.225 | 0.077 | 1.087 | 0.151 | 1.410 | 0.261 | 1.127 | 0.295 |
| 1375733_at | AW520755 | Transcribed locus | --- | 0.261 | 0.077 | 0.388 | 0.004 | 0.635 | 0.152 | 0.373 | 0.055 |
| 1395368_at | BF408886 | Transcribed locus | --- | 0.717 | 0.077 | 0.180 | 0.001 | 0.663 | 0.023 | 0.256 | 0.060 |
| 1381482_at | AI555166 | Transcribed locus | --- | 2.478 | 0.077 | 0.525 | 0.664 | 0.939 | 0.105 | 0.772 | 0.352 |
| 1371773_at | AI179413 | Transcribed locus | --- | 0.964 | 0.077 | 0.775 | 0.020 | 0.619 | 0.019 | 0.860 | 0.184 |
| 1379984_at | AI411147 | Transcribed locus | --- | 0.865 | 0.077 | 1.222 | 0.199 | 0.867 | 0.112 | 1.475 | 0.049 |
| 1395373_at | BF561546 | Transcribed locus | --- | 0.611 | 0.077 | 0.559 | 0.305 | 0.563 | 0.071 | 0.645 | 0.127 |
| 1397766_at | BI291982 | Transcribed locus | --- | 2.236 | 0.077 | 0.757 | 0.062 | 2.628 | 0.044 | 1.065 | 0.751 |
| 1379296_at | AI137435 | Transcribed locus | --- | 0.463 | 0.077 | 0.963 | 0.326 | 0.935 | 0.358 | 1.003 | 0.827 |
| 1382684_at | BI293639 | Transcribed locus | --- | 0.786 | 0.077 | 1.316 | 0.292 | 1.318 | 0.088 | 1.087 | 0.689 |
| 1374773_at | BF398048 | Transcribed locus | --- | 1.565 | 0.078 | 1.653 | 0.040 | 0.966 | 0.158 | 1.258 | 0.016 |
| 1378899_at | BE108523 | Transcribed locus | --- | 0.546 | 0.078 | 0.624 | 0.003 | 0.526 | 0.006 | 0.631 | 0.041 |
| 1376237_at | AI145040 | Transcribed locus | --- | 1.488 | 0.078 | 1.682 | 0.011 | 0.907 | 0.625 | 1.679 | 0.001 |
| 1399129_at | AA924317 | Transcribed locus | --- | 0.768 | 0.078 | 0.692 | 0.030 | 0.777 | 0.087 | 0.780 | 0.797 |
| 1371775_at | AI172057 | Transcribed locus | --- | 0.727 | 0.078 | 0.515 | 0.034 | 1.368 | 0.752 | 0.413 | 0.020 |
| 1394430_at | AI511275 | Transcribed locus | --- | 0.624 | 0.078 | 0.414 | 0.021 | 0.500 | 0.049 | 0.580 | 0.033 |
| 1385826_at | AA860047 | Transcribed locus | --- | 0.813 | 0.078 | 0.288 | 0.005 | 0.379 | 0.049 | 0.352 | 0.043 |
| 1378003_at | BM391860 | Transcribed locus | --- | 2.382 | 0.079 | 1.766 | 0.030 | 1.942 | 0.046 | 1.447 | 0.518 |
| 1383819_at | BI292866 | Transcribed locus | --- | 0.963 | 0.079 | 0.781 | 0.045 | 0.868 | 0.071 | 0.844 | 0.196 |
| 1398956_at | BE113384 | Transcribed locus | --- | 0.804 | 0.079 | 0.650 | 0.009 | 0.694 | 0.144 | 0.670 | 0.164 |
| 1393135_at | BM390238 | Transcribed locus | --- | 0.690 | 0.079 | 0.715 | 0.190 | 0.820 | 0.094 | 1.000 | 0.998 |
| 1376032_at | BF283840 | Transcribed locus | --- | 1.064 | 0.079 | 1.160 | 0.309 | 1.691 | 0.056 | 1.004 | 0.545 |

|            |          |                   |     |       |       |       |       |       |       |       |       |
|------------|----------|-------------------|-----|-------|-------|-------|-------|-------|-------|-------|-------|
| 1374598_at | AW914984 | Transcribed locus | --- | 0.842 | 0.079 | 0.766 | 0.018 | 0.745 | 0.291 | 0.746 | 0.450 |
| 1388649_at | BI291470 | Transcribed locus | --- | 0.903 | 0.079 | 0.735 | 0.280 | 0.814 | 0.071 | 0.737 | 0.067 |
| 1372126_at | BI288075 | Transcribed locus | --- | 0.633 | 0.079 | 0.654 | 0.001 | 0.458 | 0.026 | 0.575 | 0.010 |
| 1374259_at | BG378156 | Transcribed locus | --- | 1.792 | 0.080 | 0.408 | 0.006 | 1.441 | 0.110 | 0.588 | 0.003 |
| 1373423_at | AI170766 | Transcribed locus | --- | 0.542 | 0.080 | 0.804 | 0.039 | 0.825 | 0.399 | 0.830 | 0.078 |
| 1384018_at | BG663446 | Transcribed locus | --- | 1.010 | 0.080 | 0.949 | 0.683 | 0.934 | 0.168 | 0.999 | 0.833 |
| 1399109_at | BI281673 | Transcribed locus | --- | 0.479 | 0.080 | 0.363 | 0.000 | 0.696 | 0.284 | 0.457 | 0.028 |
| 1390057_at | AA875554 | Transcribed locus | --- | 0.521 | 0.080 | 0.358 | 0.020 | 0.322 | 0.233 | 0.314 | 0.089 |
| 1399060_at | BE113005 | Transcribed locus | --- | 1.213 | 0.081 | 0.750 | 0.004 | 1.128 | 0.381 | 0.751 | 0.004 |
| 1397046_at | BE120364 | Transcribed locus | --- | 0.707 | 0.081 | 0.668 | 0.177 | 1.090 | 0.751 | 0.707 | 0.131 |
| 1384562_at | AI071755 | Transcribed locus | --- | 2.213 | 0.081 | 0.821 | 0.026 | 1.625 | 0.316 | 1.210 | 0.202 |
| 1380341_at | BE096469 | Transcribed locus | --- | 0.885 | 0.081 | 1.084 | 0.484 | 0.889 | 0.071 | 1.000 | 0.999 |
| 1391342_at | AI058512 | Transcribed locus | --- | 0.587 | 0.081 | 0.998 | 0.971 | 0.591 | 0.082 | 0.999 | 0.999 |
| 1383240_at | BE110753 | Transcribed locus | --- | 1.560 | 0.082 | 0.833 | 0.598 | 0.815 | 0.206 | 1.007 | 0.797 |
| 1386257_at | AA858641 | Transcribed locus | --- | 0.557 | 0.082 | 0.377 | 0.006 | 0.558 | 0.176 | 0.402 | 0.003 |
| 1388738_at | AI411227 | Transcribed locus | --- | 0.272 | 0.082 | 0.209 | 0.002 | 0.882 | 0.880 | 0.184 | 0.030 |
| 1376386_at | BF393799 | Transcribed locus | --- | 0.455 | 0.082 | 0.853 | 0.809 | 0.957 | 0.123 | 1.013 | 0.808 |
| 1382158_at | BF557889 | Transcribed locus | --- | 1.478 | 0.082 | 1.486 | 0.213 | 2.855 | 0.017 | 2.025 | 0.080 |
| 1374312_at | BI297050 | Transcribed locus | --- | 0.764 | 0.082 | 1.132 | 0.462 | 0.609 | 0.024 | 0.843 | 0.109 |
| 1379506_at | AA963909 | Transcribed locus | --- | 1.926 | 0.083 | 1.480 | 0.022 | 1.001 | 0.851 | 1.436 | 0.117 |
| 1391711_at | BM386534 | Transcribed locus | --- | 2.243 | 0.083 | 1.433 | 0.095 | 2.268 | 0.093 | 1.300 | 0.493 |
| 1376860_at | BE105713 | Transcribed locus | --- | 1.389 | 0.083 | 0.748 | 0.014 | 0.993 | 0.055 | 0.897 | 0.019 |
| 1372696_at | AA893807 | Transcribed locus | --- | 0.826 | 0.083 | 0.464 | 0.011 | 0.799 | 0.108 | 0.670 | 0.015 |
| 1395213_at | BI289885 | Transcribed locus | --- | 1.310 | 0.083 | 0.867 | 0.080 | 1.030 | 0.978 | 0.860 | 0.085 |
| 1398992_at | AI410311 | Transcribed locus | --- | 1.670 | 0.084 | 0.667 | 0.020 | 1.410 | 0.088 | 1.070 | 0.479 |
| 1374514_at | BG671893 | Transcribed locus | --- | 1.469 | 0.084 | 0.975 | 0.443 | 1.753 | 0.041 | 0.973 | 0.462 |
| 1393154_at | BM384240 | Transcribed locus | --- | 0.449 | 0.084 | 1.109 | 0.184 | 0.279 | 0.000 | 1.308 | 0.096 |
| 1373336_at | AI411074 | Transcribed locus | --- | 0.785 | 0.085 | 0.372 | 0.000 | 0.726 | 0.020 | 0.384 | 0.025 |
| 1390743_at | BF405616 | Transcribed locus | --- | 1.282 | 0.085 | 2.955 | 0.021 | 1.261 | 0.226 | 2.423 | 0.058 |
| 1377201_at | BE109156 | Transcribed locus | --- | 0.698 | 0.085 | 0.267 | 0.004 | 0.206 | 0.037 | 0.210 | 0.003 |
| 1395483_at | BI296524 | Transcribed locus | --- | 1.921 | 0.085 | 0.749 | 0.981 | 1.018 | 0.853 | 0.930 | 0.930 |
| 1393133_at | BG381252 | Transcribed locus | --- | 0.739 | 0.086 | 0.870 | 0.248 | 1.041 | 0.485 | 1.218 | 0.990 |
| 1385883_at | AI144842 | Transcribed locus | --- | 0.743 | 0.086 | 0.671 | 0.001 | 0.665 | 0.074 | 0.737 | 0.001 |
| 1385542_at | BF402259 | Transcribed locus | --- | 1.614 | 0.086 | 1.260 | 0.079 | 1.136 | 0.716 | 1.191 | 0.253 |
| 1382107_at | AI176848 | Transcribed locus | --- | 1.416 | 0.086 | 0.988 | 0.919 | 1.760 | 0.019 | 1.241 | 0.096 |
| 1384419_at | AA944588 | Transcribed locus | --- | 1.667 | 0.086 | 1.354 | 0.494 | 2.230 | 0.052 | 0.823 | 0.106 |
| 1391329_at | BM387817 | Transcribed locus | --- | 1.297 | 0.087 | 1.029 | 0.896 | 1.010 | 0.228 | 1.004 | 0.999 |
| 1391274_at | BI292056 | Transcribed locus | --- | 1.119 | 0.087 | 0.783 | 0.967 | 0.822 | 0.264 | 0.995 | 0.971 |
| 1382346_at | BF281960 | Transcribed locus | --- | 1.508 | 0.087 | 0.979 | 0.977 | 1.427 | 0.617 | 1.413 | 0.501 |
| 1372024_at | AI104846 | Transcribed locus | --- | 1.106 | 0.087 | 2.241 | 0.003 | 1.097 | 0.754 | 1.719 | 0.011 |
| 1379364_at | BI273752 | Transcribed locus | --- | 0.727 | 0.087 | 1.018 | 0.094 | 0.688 | 0.061 | 0.946 | 0.488 |
| 1378185_at | AW528873 | Transcribed locus | --- | 1.604 | 0.088 | 1.493 | 0.072 | 1.363 | 0.077 | 3.041 | 0.002 |
| 1396378_at | BF412429 | Transcribed locus | --- | 2.109 | 0.088 | 2.159 | 0.070 | 2.097 | 0.126 | 1.739 | 0.118 |
| 1381902_at | BE116321 | Transcribed locus | --- | 1.447 | 0.088 | 2.369 | 0.000 | 1.190 | 0.021 | 1.910 | 0.001 |
| 1376531_at | BF416276 | Transcribed locus | --- | 0.766 | 0.088 | 0.529 | 0.113 | 0.738 | 0.086 | 0.679 | 0.210 |
| 1383216_at | BM390667 | Transcribed locus | --- | 1.769 | 0.088 | 2.677 | 0.000 | 0.912 | 0.417 | 1.997 | 0.013 |
| 1384119_at | AI072851 | Transcribed locus | --- | 1.180 | 0.088 | 0.998 | 0.927 | 1.005 | 0.974 | 0.972 | 0.179 |
| 1377597_at | BI300688 | Transcribed locus | --- | 0.746 | 0.088 | 0.389 | 0.001 | 1.145 | 0.224 | 0.617 | 0.015 |
| 1382754_at | H33080   | Transcribed locus | --- | 0.591 | 0.088 | 0.997 | 0.973 | 0.788 | 0.462 | 0.996 | 0.972 |
| 1376235_at | BI289136 | Transcribed locus | --- | 0.895 | 0.089 | 0.496 | 0.004 | 0.912 | 0.142 | 0.619 | 0.043 |
| 1381058_at | AI548492 | Transcribed locus | --- | 2.339 | 0.089 | 0.437 | 0.012 | 1.475 | 0.018 | 0.618 | 0.043 |
| 1395468_at | BF409952 | Transcribed locus | --- | 0.627 | 0.089 | 0.218 | 0.000 | 1.869 | 0.171 | 0.312 | 0.023 |
| 1390132_at | BF282059 | Transcribed locus | --- | 1.112 | 0.089 | 1.377 | 0.874 | 1.218 | 0.203 | 1.120 | 0.229 |
| 1377082_at | BF567763 | Transcribed locus | --- | 0.598 | 0.089 | 1.247 | 0.771 | 1.130 | 0.348 | 0.761 | 0.140 |
| 1376047_at | BI285321 | Transcribed locus | --- | 0.511 | 0.090 | 0.309 | 0.002 | 0.646 | 0.022 | 0.459 | 0.009 |
| 1378350_at | AA859902 | Transcribed locus | --- | 0.322 | 0.090 | 0.160 | 0.000 | 0.295 | 0.090 | 0.240 | 0.003 |
| 1373999_at | AI406350 | Transcribed locus | --- | 0.647 | 0.090 | 0.882 | 0.265 | 0.425 | 0.001 | 0.708 | 0.012 |
| 1388918_at | BG378074 | Transcribed locus | --- | 0.521 | 0.090 | 0.377 | 0.000 | 0.647 | 0.019 | 0.456 | 0.013 |
| 1392633_at | AI045724 | Transcribed locus | --- | 1.436 | 0.091 | 3.173 | 0.003 | 1.002 | 0.820 | 1.492 | 0.260 |
| 1388607_at | AI177408 | Transcribed locus | --- | 1.717 | 0.091 | 1.256 | 0.069 | 0.982 | 0.178 | 1.306 | 0.048 |
| 1374269_at | BF398756 | Transcribed locus | --- | 0.768 | 0.091 | 0.615 | 0.174 | 0.627 | 0.094 | 0.652 | 0.204 |

|              |          |                   |     |       |       |       |       |       |       |       |       |
|--------------|----------|-------------------|-----|-------|-------|-------|-------|-------|-------|-------|-------|
| 1372890_at   | BM389696 | Transcribed locus | --- | 1.049 | 0.091 | 1.097 | 0.474 | 1.538 | 0.097 | 1.202 | 0.344 |
| 1378631_at   | BM388084 | Transcribed locus | --- | 0.895 | 0.091 | 0.985 | 0.622 | 0.912 | 0.214 | 0.950 | 0.030 |
| 1371559_at   | AI103384 | Transcribed locus | --- | 0.555 | 0.091 | 0.617 | 0.008 | 0.537 | 0.014 | 0.651 | 0.007 |
| 1382455_at   | BG379564 | Transcribed locus | --- | 1.224 | 0.091 | 0.734 | 0.238 | 2.165 | 0.055 | 1.389 | 0.302 |
| 1378237_at   | BG376172 | Transcribed locus | --- | 1.450 | 0.091 | 1.183 | 0.058 | 2.688 | 0.004 | 1.598 | 0.010 |
| 1392199_at   | BF398981 | Transcribed locus | --- | 0.610 | 0.091 | 0.196 | 0.008 | 0.348 | 0.006 | 0.266 | 0.013 |
| 1391264_at   | AA875301 | Transcribed locus | --- | 0.890 | 0.092 | 0.478 | 0.004 | 0.776 | 0.125 | 0.636 | 0.004 |
| 1395601_at   | BI302615 | Transcribed locus | --- | 0.864 | 0.092 | 0.167 | 0.004 | 0.498 | 0.080 | 0.344 | 0.010 |
| 1379835_at   | BF558512 | Transcribed locus | --- | 0.759 | 0.092 | 0.325 | 0.020 | 0.246 | 0.108 | 0.419 | 0.037 |
| 1377052_at   | AW533469 | Transcribed locus | --- | 2.208 | 0.092 | 2.481 | 0.010 | 5.021 | 0.006 | 4.087 | 0.015 |
| 1380155_at   | AI137306 | Transcribed locus | --- | 1.882 | 0.092 | 1.992 | 0.012 | 1.596 | 0.035 | 1.497 | 0.075 |
| 1380685_at   | AI103408 | Transcribed locus | --- | 1.312 | 0.092 | 0.477 | 0.072 | 1.004 | 0.478 | 0.405 | 0.056 |
| 1397652_at   | BE108399 | Transcribed locus | --- | 0.651 | 0.093 | 0.203 | 0.002 | 0.446 | 0.099 | 0.489 | 0.022 |
| 1377444_at   | BE120680 | Transcribed locus | --- | 1.293 | 0.093 | 0.954 | 0.754 | 1.152 | 0.323 | 1.022 | 0.886 |
| 1371472_at   | BG380581 | Transcribed locus | --- | 1.574 | 0.093 | 0.982 | 0.734 | 1.048 | 0.775 | 0.926 | 0.743 |
| 1393120_at   | BG381381 | Transcribed locus | --- | 0.593 | 0.093 | 0.967 | 0.329 | 0.455 | 0.005 | 0.809 | 0.014 |
| 1390466_at   | AW531623 | Transcribed locus | --- | 0.611 | 0.093 | 0.501 | 0.001 | 0.936 | 0.084 | 0.497 | 0.010 |
| 1386279_at   | AI235655 | Transcribed locus | --- | 0.474 | 0.093 | 0.475 | 0.003 | 0.489 | 0.112 | 0.383 | 0.027 |
| 1383978_at   | BM384029 | Transcribed locus | --- | 0.460 | 0.093 | 0.744 | 0.087 | 0.441 | 0.007 | 0.743 | 0.046 |
| 1378132_at   | AI716098 | Transcribed locus | --- | 2.341 | 0.093 | 2.571 | 0.031 | 2.435 | 0.003 | 2.618 | 0.046 |
| 1389974_at   | BF555171 | Transcribed locus | --- | 0.544 | 0.094 | 0.639 | 0.032 | 0.461 | 0.203 | 0.499 | 0.202 |
| 1396995_at   | BG376821 | Transcribed locus | --- | 2.365 | 0.094 | 1.227 | 0.571 | 2.188 | 0.048 | 0.691 | 0.354 |
| 1374066_at   | BG376309 | Transcribed locus | --- | 1.004 | 0.094 | 1.668 | 0.034 | 1.319 | 0.027 | 1.804 | 0.054 |
| 1373265_at   | BM383832 | Transcribed locus | --- | 1.299 | 0.094 | 1.109 | 0.214 | 1.498 | 0.076 | 0.912 | 0.556 |
| 1380003_at   | BI281665 | Transcribed locus | --- | 1.284 | 0.094 | 1.782 | 0.012 | 0.763 | 0.043 | 2.778 | 0.004 |
| 1389372_at   | BF394221 | Transcribed locus | --- | 1.450 | 0.094 | 0.709 | 0.016 | 1.947 | 0.023 | 0.917 | 0.699 |
| 1383934_at   | BI299169 | Transcribed locus | --- | 0.418 | 0.094 | 0.510 | 0.001 | 0.630 | 0.154 | 0.612 | 0.000 |
| 1393226_at   | BI275559 | Transcribed locus | --- | 2.001 | 0.094 | 0.912 | 0.240 | 1.616 | 0.102 | 1.249 | 0.017 |
| 1376820_at   | AI045220 | Transcribed locus | --- | 0.592 | 0.094 | 0.102 | 0.000 | 0.996 | 0.079 | 0.123 | 0.007 |
| 1379739_at   | BF408431 | Transcribed locus | --- | 0.753 | 0.094 | 0.838 | 0.006 | 0.991 | 0.370 | 0.913 | 0.378 |
| 1399156_at   | AA900891 | Transcribed locus | --- | 1.324 | 0.094 | 0.611 | 0.038 | 1.671 | 0.018 | 0.803 | 0.000 |
| 1393298_at   | BF566249 | Transcribed locus | --- | 0.993 | 0.094 | 1.453 | 0.012 | 1.406 | 0.014 | 1.395 | 0.176 |
| 1385822_at   | AI030314 | Transcribed locus | --- | 0.786 | 0.095 | 0.361 | 0.017 | 1.076 | 0.770 | 0.546 | 0.048 |
| 1383226_at   | BI293943 | Transcribed locus | --- | 1.684 | 0.096 | 0.532 | 0.014 | 1.055 | 0.442 | 0.581 | 0.003 |
| 1376698_at   | BF418869 | Transcribed locus | --- | 0.854 | 0.096 | 0.583 | 0.073 | 0.870 | 0.618 | 1.006 | 0.155 |
| 1398415_at   | BG380708 | Transcribed locus | --- | 0.422 | 0.096 | 0.271 | 0.013 | 1.155 | 0.055 | 0.306 | 0.027 |
| 1374688_at   | AA945696 | Transcribed locus | --- | 0.742 | 0.096 | 0.259 | 0.003 | 0.917 | 0.825 | 0.447 | 0.015 |
| 1393174_at   | AI412813 | Transcribed locus | --- | 1.576 | 0.097 | 1.065 | 0.553 | 2.085 | 0.067 | 1.136 | 0.287 |
| 1391090_at   | BG380796 | Transcribed locus | --- | 0.563 | 0.097 | 0.327 | 0.006 | 0.564 | 0.093 | 0.277 | 0.006 |
| 1384204_at   | BG379466 | Transcribed locus | --- | 0.884 | 0.098 | 0.400 | 0.015 | 0.914 | 0.879 | 0.711 | 0.075 |
| 1390792_a_at | AI406827 | Transcribed locus | --- | 1.407 | 0.098 | 1.005 | 0.979 | 1.001 | 0.821 | 1.038 | 0.369 |
| 1380395_at   | AI230394 | Transcribed locus | --- | 0.900 | 0.099 | 1.768 | 0.001 | 0.611 | 0.036 | 1.743 | 0.008 |
| 1390545_at   | AI178155 | Transcribed locus | --- | 0.622 | 0.099 | 0.522 | 0.020 | 0.512 | 0.002 | 0.552 | 0.008 |
| 1393062_at   | BI275419 | Transcribed locus | --- | 0.504 | 0.099 | 0.549 | 0.044 | 0.371 | 0.009 | 0.873 | 0.216 |
| 1374644_at   | BM386365 | Transcribed locus | --- | 0.391 | 0.100 | 0.404 | 0.003 | 0.439 | 0.052 | 0.641 | 0.012 |
| 1385755_at   | BF396388 | Transcribed locus | --- | 2.153 | 0.100 | 1.256 | 0.098 | 3.131 | 0.028 | 1.939 | 0.009 |
| 1390456_at   | AW524471 | Transcribed locus | --- | 0.592 | 0.100 | 0.392 | 0.000 | 0.679 | 0.068 | 0.451 | 0.000 |
| 1386641_at   | BF546770 | Transcribed locus | --- | 2.047 | 0.100 | 1.441 | 0.002 | 1.463 | 0.009 | 1.767 | 0.002 |
| 1397214_at   | BF288533 | Transcribed locus | --- | 0.321 | 0.101 | 0.174 | 0.007 | 0.566 | 0.060 | 0.236 | 0.015 |
| 1380409_at   | BF413455 | Transcribed locus | --- | 0.526 | 0.101 | 0.595 | 0.224 | 0.762 | 0.294 | 1.318 | 0.251 |
| 1391694_at   | AW521119 | Transcribed locus | --- | 0.629 | 0.101 | 0.245 | 0.001 | 0.793 | 0.181 | 0.334 | 0.001 |
| 1395414_at   | BI296064 | Transcribed locus | --- | 0.348 | 0.101 | 0.133 | 0.009 | 0.999 | 0.087 | 0.425 | 0.074 |
| 1383766_at   | BG663338 | Transcribed locus | --- | 0.554 | 0.102 | 0.473 | 0.013 | 0.478 | 0.180 | 0.246 | 0.014 |
| 1374673_at   | BI292547 | Transcribed locus | --- | 1.462 | 0.102 | 1.226 | 0.140 | 1.379 | 0.319 | 0.946 | 0.456 |
| 1383540_at   | BF551093 | Transcribed locus | --- | 1.000 | 0.102 | 0.470 | 0.006 | 0.905 | 0.231 | 1.070 | 0.539 |
| 1392955_at   | BF548909 | Transcribed locus | --- | 0.754 | 0.102 | 0.887 | 0.314 | 1.055 | 0.290 | 0.987 | 0.892 |
| 1389402_at   | AI178746 | Transcribed locus | --- | 1.658 | 0.102 | 5.277 | 0.009 | 1.926 | 0.106 | 3.049 | 0.013 |
| 1397015_at   | BF386238 | Transcribed locus | --- | 0.597 | 0.103 | 0.775 | 0.191 | 0.665 | 0.211 | 0.753 | 0.384 |
| 1390376_at   | BF406135 | Transcribed locus | --- | 1.356 | 0.103 | 0.658 | 0.648 | 1.900 | 0.014 | 1.089 | 0.550 |
| 1391535_at   | BF284610 | Transcribed locus | --- | 0.573 | 0.103 | 0.205 | 0.002 | 0.387 | 0.011 | 0.337 | 0.015 |
| 1380023_at   | AA997863 | Transcribed locus | --- | 1.788 | 0.103 | 1.001 | 0.996 | 1.749 | 0.009 | 0.808 | 0.155 |



|              |          |                   |     |       |       |       |       |       |       |       |       |
|--------------|----------|-------------------|-----|-------|-------|-------|-------|-------|-------|-------|-------|
| 1376975_at   | AA849719 | Transcribed locus | --- | 1.188 | 0.104 | 0.775 | 0.843 | 1.056 | 0.427 | 0.941 | 0.831 |
| 1376827_at   | BE111290 | Transcribed locus | --- | 1.407 | 0.104 | 1.189 | 0.278 | 0.984 | 0.941 | 1.126 | 0.396 |
| 1385150_at   | AI045507 | Transcribed locus | --- | 3.133 | 0.104 | 1.376 | 0.087 | 6.487 | 0.024 | 1.042 | 0.108 |
| 1390515_at   | AA998383 | Transcribed locus | --- | 1.935 | 0.104 | 1.815 | 0.080 | 2.007 | 0.093 | 1.846 | 0.060 |
| 1393236_at   | AI137233 | Transcribed locus | --- | 1.303 | 0.105 | 2.782 | 0.001 | 1.358 | 0.143 | 3.011 | 0.004 |
| 1383593_at   | BE113211 | Transcribed locus | --- | 1.260 | 0.105 | 0.396 | 0.002 | 1.754 | 0.002 | 0.442 | 0.049 |
| 1376763_at   | AW915423 | Transcribed locus | --- | 1.988 | 0.105 | 0.803 | 0.061 | 2.117 | 0.164 | 0.928 | 0.848 |
| 1390136_at   | BE109274 | Transcribed locus | --- | 2.706 | 0.105 | 5.883 | 0.013 | 2.438 | 0.013 | 5.599 | 0.008 |
| 1377681_at   | AA925313 | Transcribed locus | --- | 0.755 | 0.105 | 0.537 | 0.040 | 0.958 | 0.985 | 0.689 | 0.011 |
| 1373580_at   | BI289991 | Transcribed locus | --- | 0.743 | 0.106 | 0.501 | 0.013 | 0.816 | 0.068 | 0.628 | 0.107 |
| 1388342_at   | BI291344 | Transcribed locus | --- | 1.363 | 0.106 | 0.836 | 0.164 | 1.147 | 0.634 | 0.959 | 0.197 |
| 1384214_a_at | AI045459 | Transcribed locus | --- | 0.502 | 0.106 | 0.266 | 0.004 | 0.753 | 0.784 | 0.420 | 0.036 |
| 1373453_at   | AA849756 | Transcribed locus | --- | 1.886 | 0.106 | 1.369 | 0.918 | 0.999 | 0.993 | 0.999 | 0.793 |
| 1384462_at   | AA819526 | Transcribed locus | --- | 2.068 | 0.106 | 1.306 | 0.824 | 3.532 | 0.001 | 1.143 | 0.614 |
| 1373634_at   | AI177753 | Transcribed locus | --- | 0.789 | 0.107 | 0.569 | 0.000 | 0.809 | 0.185 | 0.611 | 0.007 |
| 1389477_at   | BI278855 | Transcribed locus | --- | 0.708 | 0.107 | 2.024 | 0.012 | 0.681 | 0.082 | 1.309 | 0.474 |
| 1373859_at   | AA819884 | Transcribed locus | --- | 0.641 | 0.108 | 0.277 | 0.000 | 0.901 | 0.039 | 0.357 | 0.007 |
| 1382572_at   | AI577469 | Transcribed locus | --- | 0.604 | 0.108 | 0.937 | 0.195 | 0.983 | 0.108 | 0.590 | 0.095 |
| 1396202_at   | BF401339 | Transcribed locus | --- | 1.003 | 0.108 | 0.889 | 0.267 | 1.168 | 0.399 | 1.097 | 0.200 |
| 1389522_at   | BE109446 | Transcribed locus | --- | 0.420 | 0.108 | 0.199 | 0.004 | 1.147 | 0.391 | 0.425 | 0.018 |
| 1394448_at   | BG380768 | Transcribed locus | --- | 0.850 | 0.108 | 0.874 | 0.900 | 0.568 | 0.049 | 1.005 | 0.695 |
| 1375880_at   | AI170384 | Transcribed locus | --- | 0.379 | 0.109 | 0.253 | 0.000 | 0.550 | 0.007 | 0.320 | 0.003 |
| 1389337_at   | AA946032 | Transcribed locus | --- | 0.728 | 0.109 | 0.498 | 0.028 | 0.859 | 0.293 | 0.802 | 0.104 |
| 1375777_at   | BF402633 | Transcribed locus | --- | 0.988 | 0.109 | 0.999 | 0.994 | 0.448 | 0.065 | 0.834 | 0.108 |
| 1376267_at   | AA859652 | Transcribed locus | --- | 2.588 | 0.109 | 1.116 | 0.346 | 7.375 | 0.009 | 1.522 | 0.043 |
| 1389411_at   | AW435329 | Transcribed locus | --- | 0.631 | 0.109 | 0.105 | 0.003 | 0.485 | 0.059 | 0.273 | 0.001 |
| 1390156_a_at | BF283671 | Transcribed locus | --- | 0.491 | 0.109 | 0.328 | 0.047 | 0.388 | 0.062 | 0.552 | 0.121 |
| 1374113_at   | BM387384 | Transcribed locus | --- | 1.783 | 0.109 | 1.806 | 0.015 | 1.423 | 0.272 | 2.432 | 0.057 |
| 1377831_at   | BF285316 | Transcribed locus | --- | 0.545 | 0.109 | 0.966 | 0.899 | 0.517 | 0.018 | 0.839 | 0.042 |
| 1397583_at   | BF394946 | Transcribed locus | --- | 0.627 | 0.110 | 0.356 | 0.014 | 0.703 | 0.925 | 0.357 | 0.007 |
| 1376275_at   | BE101108 | Transcribed locus | --- | 0.762 | 0.110 | 0.652 | 0.038 | 0.571 | 0.361 | 0.855 | 0.107 |
| 1382917_at   | AI043869 | Transcribed locus | --- | 0.410 | 0.110 | 0.247 | 0.002 | 0.480 | 0.084 | 0.243 | 0.004 |
| 1382611_at   | AA945938 | Transcribed locus | --- | 0.594 | 0.110 | 0.810 | 0.760 | 1.028 | 0.403 | 0.975 | 0.759 |
| 1389736_at   | BM392358 | Transcribed locus | --- | 1.604 | 0.110 | 0.940 | 0.372 | 0.919 | 0.583 | 0.939 | 0.301 |
| 1374674_at   | AW528792 | Transcribed locus | --- | 0.633 | 0.110 | 0.506 | 0.001 | 0.848 | 0.200 | 0.679 | 0.082 |
| 1382573_at   | AI233217 | Transcribed locus | --- | 1.651 | 0.110 | 1.021 | 0.929 | 0.553 | 0.022 | 1.054 | 0.875 |
| 1397881_at   | AI575768 | Transcribed locus | --- | 1.181 | 0.110 | 0.470 | 0.011 | 1.502 | 0.044 | 0.551 | 0.040 |
| 1378246_at   | AW535196 | Transcribed locus | --- | 1.522 | 0.111 | 1.619 | 0.946 | 1.544 | 0.326 | 1.006 | 0.599 |
| 1375673_at   | AI102620 | Transcribed locus | --- | 1.307 | 0.111 | 2.011 | 0.017 | 1.417 | 0.140 | 1.536 | 0.014 |
| 1388524_at   | BF284328 | Transcribed locus | --- | 1.211 | 0.111 | 0.893 | 0.050 | 0.891 | 0.025 | 0.633 | 0.032 |
| 1389134_at   | BF551369 | Transcribed locus | --- | 1.722 | 0.111 | 0.627 | 0.010 | 1.351 | 0.185 | 0.744 | 0.043 |
| 1392501_at   | BE120710 | Transcribed locus | --- | 0.718 | 0.111 | 0.497 | 0.000 | 0.850 | 0.682 | 0.769 | 0.001 |
| 1377823_at   | AW531363 | Transcribed locus | --- | 1.688 | 0.112 | 1.766 | 0.022 | 1.735 | 0.148 | 1.533 | 0.000 |
| 1385580_at   | AI071620 | Transcribed locus | --- | 1.957 | 0.112 | 0.905 | 0.980 | 3.249 | 0.014 | 2.305 | 0.021 |
| 1378232_at   | BF417445 | Transcribed locus | --- | 0.531 | 0.112 | 1.670 | 0.036 | 0.658 | 0.006 | 1.506 | 0.039 |
| 1374879_x_at | AI228249 | Transcribed locus | --- | 1.339 | 0.112 | 1.091 | 0.369 | 0.874 | 0.410 | 1.123 | 0.250 |
| 1376999_at   | BF389721 | Transcribed locus | --- | 0.750 | 0.112 | 0.549 | 0.004 | 0.654 | 0.277 | 0.552 | 0.007 |
| 1382395_at   | AA963192 | Transcribed locus | --- | 2.570 | 0.112 | 1.462 | 0.329 | 4.398 | 0.073 | 2.691 | 0.011 |
| 1385060_at   | BF401036 | Transcribed locus | --- | 1.020 | 0.113 | 0.257 | 0.002 | 1.014 | 0.962 | 0.331 | 0.020 |
| 1376620_at   | AI137912 | Transcribed locus | --- | 1.327 | 0.113 | 1.229 | 0.059 | 1.344 | 0.062 | 1.061 | 0.733 |
| 1383123_at   | BF559503 | Transcribed locus | --- | 1.263 | 0.113 | 0.651 | 0.004 | 0.940 | 0.877 | 0.908 | 0.023 |
| 1383885_at   | BF560882 | Transcribed locus | --- | 1.230 | 0.113 | 0.956 | 0.823 | 1.380 | 0.193 | 0.999 | 0.549 |
| 1384743_at   | BF418132 | Transcribed locus | --- | 0.365 | 0.114 | 0.590 | 0.070 | 0.327 | 0.001 | 0.528 | 0.114 |
| 1374729_at   | BM385616 | Transcribed locus | --- | 1.712 | 0.114 | 2.207 | 0.026 | 1.710 | 0.009 | 2.625 | 0.005 |
| 1373962_at   | AI178556 | Transcribed locus | --- | 2.145 | 0.114 | 1.570 | 0.033 | 1.359 | 0.422 | 1.479 | 0.004 |
| 1376283_at   | BG378070 | Transcribed locus | --- | 0.538 | 0.114 | 0.139 | 0.007 | 0.446 | 0.004 | 0.116 | 0.032 |
| 1390034_at   | BF393945 | Transcribed locus | --- | 0.938 | 0.115 | 0.403 | 0.025 | 0.838 | 0.093 | 0.496 | 0.060 |
| 1377004_at   | AA800184 | Transcribed locus | --- | 0.959 | 0.115 | 0.884 | 0.307 | 0.975 | 0.886 | 0.795 | 0.299 |
| 1388383_at   | AI412740 | Transcribed locus | --- | 0.725 | 0.116 | 0.552 | 0.000 | 0.683 | 0.001 | 0.711 | 0.005 |
| 1375781_at   | BF419844 | Transcribed locus | --- | 1.271 | 0.116 | 0.470 | 0.075 | 1.273 | 0.499 | 0.443 | 0.070 |
| 1388825_at   | BE119400 | Transcribed locus | --- | 0.860 | 0.116 | 1.076 | 0.147 | 0.764 | 0.049 | 0.614 | 0.017 |

|              |          |                   |     |       |       |       |       |       |       |       |       |
|--------------|----------|-------------------|-----|-------|-------|-------|-------|-------|-------|-------|-------|
| 1393736_at   | BE116820 | Transcribed locus | --- | 0.770 | 0.117 | 0.318 | 0.001 | 0.813 | 0.044 | 0.501 | 0.030 |
| 1376800_at   | AA892496 | Transcribed locus | --- | 1.392 | 0.117 | 1.118 | 0.517 | 1.006 | 0.236 | 1.003 | 0.841 |
| 1374372_at   | BF392147 | Transcribed locus | --- | 0.867 | 0.117 | 0.881 | 0.128 | 1.118 | 0.696 | 0.760 | 0.166 |
| 1388317_at   | BE110655 | Transcribed locus | --- | 0.791 | 0.118 | 0.658 | 0.027 | 0.827 | 0.121 | 0.796 | 0.117 |
| 1396461_at   | BE117448 | Transcribed locus | --- | 1.394 | 0.118 | 0.888 | 0.451 | 1.046 | 0.945 | 1.050 | 0.373 |
| 1396397_at   | AW529321 | Transcribed locus | --- | 1.951 | 0.118 | 1.389 | 0.895 | 1.241 | 0.275 | 1.659 | 0.083 |
| 1391499_at   | BF551074 | Transcribed locus | --- | 1.190 | 0.119 | 0.836 | 0.945 | 0.999 | 0.999 | 0.977 | 0.756 |
| 1385881_at   | BE100612 | Transcribed locus | --- | 0.390 | 0.119 | 0.060 | 0.003 | 0.410 | 0.058 | 0.059 | 0.002 |
| 1395425_at   | BE099398 | Transcribed locus | --- | 0.803 | 0.119 | 0.809 | 0.099 | 0.877 | 0.476 | 0.833 | 0.078 |
| 1393930_at   | AI029426 | Transcribed locus | --- | 1.463 | 0.120 | 0.600 | 0.094 | 1.603 | 0.181 | 1.143 | 0.768 |
| 1378565_at   | AW435439 | Transcribed locus | --- | 0.827 | 0.120 | 0.612 | 0.060 | 0.788 | 0.012 | 0.686 | 0.111 |
| 1384025_at   | AA943432 | Transcribed locus | --- | 0.774 | 0.120 | 0.340 | 0.000 | 0.725 | 0.367 | 0.421 | 0.035 |
| 1373072_at   | AI170552 | Transcribed locus | --- | 1.731 | 0.121 | 4.978 | 0.000 | 1.561 | 0.086 | 3.629 | 0.000 |
| 1393314_at   | BI289840 | Transcribed locus | --- | 2.039 | 0.121 | 0.612 | 0.128 | 0.905 | 0.290 | 0.702 | 0.112 |
| 1398596_at   | AA925896 | Transcribed locus | --- | 1.238 | 0.121 | 1.274 | 0.229 | 1.672 | 0.039 | 1.133 | 0.268 |
| 1389784_at   | AI177507 | Transcribed locus | --- | 1.232 | 0.121 | 0.665 | 0.005 | 1.207 | 0.174 | 0.630 | 0.003 |
| 1375028_at   | AI409635 | Transcribed locus | --- | 3.355 | 0.121 | 2.713 | 0.017 | 1.778 | 0.419 | 1.011 | 0.415 |
| 1376183_at   | AI101484 | Transcribed locus | --- | 0.707 | 0.122 | 0.207 | 0.000 | 0.786 | 0.437 | 0.326 | 0.007 |
| 1390538_at   | BF414192 | Transcribed locus | --- | 0.557 | 0.123 | 0.752 | 0.106 | 0.676 | 0.016 | 0.924 | 0.357 |
| 1377412_at   | AI146237 | Transcribed locus | --- | 0.494 | 0.123 | 0.149 | 0.002 | 0.645 | 0.086 | 0.178 | 0.009 |
| 1385164_at   | BE108640 | Transcribed locus | --- | 1.525 | 0.123 | 1.783 | 0.042 | 1.002 | 0.397 | 1.983 | 0.059 |
| 1379913_at   | BE100916 | Transcribed locus | --- | 0.667 | 0.124 | 0.395 | 0.090 | 0.651 | 0.119 | 0.400 | 0.020 |
| 1392604_at   | AA997187 | Transcribed locus | --- | 0.264 | 0.124 | 0.353 | 0.003 | 0.425 | 0.173 | 0.561 | 0.078 |
| 1367517_at   | BG373057 | Transcribed locus | --- | 1.265 | 0.124 | 0.807 | 0.201 | 1.089 | 0.641 | 0.842 | 0.251 |
| 1382524_at   | AA850361 | Transcribed locus | --- | 1.174 | 0.125 | 0.510 | 0.002 | 0.643 | 0.148 | 0.537 | 0.006 |
| 1392251_at   | BF397284 | Transcribed locus | --- | 1.431 | 0.125 | 0.759 | 0.124 | 2.269 | 0.010 | 0.981 | 0.596 |
| 1372003_at   | BI296755 | Transcribed locus | --- | 1.390 | 0.125 | 0.779 | 0.098 | 1.498 | 0.038 | 0.772 | 0.034 |
| 1378499_at   | BF405148 | Transcribed locus | --- | 1.709 | 0.125 | 1.427 | 0.045 | 1.856 | 0.064 | 1.363 | 0.154 |
| 1379265_at   | BF398764 | Transcribed locus | --- | 1.354 | 0.125 | 1.108 | 0.491 | 1.099 | 0.377 | 1.040 | 0.754 |
| 1382162_at   | BG373568 | Transcribed locus | --- | 1.880 | 0.126 | 0.993 | 0.978 | 1.304 | 0.461 | 1.004 | 0.715 |
| 1377725_at   | AI575322 | Transcribed locus | --- | 0.702 | 0.126 | 0.466 | 0.015 | 0.706 | 0.295 | 0.445 | 0.001 |
| 1391936_a_at | BI289110 | Transcribed locus | --- | 0.827 | 0.126 | 0.185 | 0.008 | 0.679 | 0.890 | 0.514 | 0.017 |
| 1372885_at   | AI230467 | Transcribed locus | --- | 1.599 | 0.127 | 1.914 | 0.002 | 1.564 | 0.067 | 1.906 | 0.009 |
| 1383954_at   | BI273721 | Transcribed locus | --- | 0.386 | 0.127 | 0.378 | 0.001 | 0.761 | 0.034 | 0.401 | 0.009 |
| 1385689_at   | BI290860 | Transcribed locus | --- | 0.935 | 0.127 | 0.805 | 0.053 | 0.702 | 0.055 | 0.752 | 0.075 |
| 1385873_at   | BM388405 | Transcribed locus | --- | 1.444 | 0.127 | 0.895 | 0.162 | 1.309 | 0.131 | 1.115 | 0.218 |
| 1396326_at   | BM390873 | Transcribed locus | --- | 0.702 | 0.127 | 0.251 | 0.002 | 0.723 | 0.080 | 0.336 | 0.037 |
| 1384284_at   | BI290838 | Transcribed locus | --- | 0.589 | 0.127 | 0.266 | 0.006 | 0.509 | 0.145 | 0.357 | 0.021 |
| 1391361_at   | BF411568 | Transcribed locus | --- | 0.600 | 0.128 | 0.226 | 0.014 | 0.736 | 0.154 | 0.238 | 0.011 |
| 1373583_at   | BF396317 | Transcribed locus | --- | 1.605 | 0.129 | 0.925 | 0.158 | 1.473 | 0.158 | 1.727 | 0.036 |
| 1380610_at   | AI406521 | Transcribed locus | --- | 1.122 | 0.129 | 0.548 | 0.071 | 1.220 | 0.095 | 0.633 | 0.121 |
| 1376194_at   | BM384889 | Transcribed locus | --- | 0.801 | 0.130 | 0.300 | 0.001 | 0.765 | 0.024 | 0.635 | 0.176 |
| 1380081_at   | AA819551 | Transcribed locus | --- | 1.497 | 0.130 | 1.237 | 0.170 | 3.680 | 0.006 | 1.301 | 0.062 |
| 1383483_at   | BE106581 | Transcribed locus | --- | 0.733 | 0.130 | 0.952 | 0.545 | 0.805 | 0.926 | 0.945 | 0.088 |
| 1375879_at   | BE111762 | Transcribed locus | --- | 0.769 | 0.131 | 0.414 | 0.002 | 0.728 | 0.051 | 0.446 | 0.033 |
| 1390873_at   | BE118616 | Transcribed locus | --- | 1.359 | 0.131 | 0.731 | 0.113 | 1.220 | 0.901 | 0.568 | 0.004 |
| 1374990_at   | AI233786 | Transcribed locus | --- | 0.977 | 0.131 | 1.387 | 0.394 | 0.796 | 0.051 | 1.197 | 0.104 |
| 1375088_at   | BF404846 | Transcribed locus | --- | 0.842 | 0.131 | 1.960 | 0.069 | 1.081 | 0.222 | 0.902 | 0.737 |
| 1394785_at   | BE329290 | Transcribed locus | --- | 1.650 | 0.132 | 0.958 | 0.244 | 1.150 | 0.774 | 0.899 | 0.501 |
| 1390586_at   | AA924192 | Transcribed locus | --- | 1.251 | 0.132 | 1.097 | 0.334 | 0.819 | 0.513 | 1.032 | 0.958 |
| 1376206_at   | BF398576 | Transcribed locus | --- | 0.596 | 0.133 | 1.614 | 0.023 | 0.753 | 0.216 | 1.620 | 0.013 |
| 1381303_at   | BE107070 | Transcribed locus | --- | 3.235 | 0.133 | 1.726 | 0.130 | 1.794 | 0.054 | 1.742 | 0.192 |
| 1383368_at   | BF550060 | Transcribed locus | --- | 0.634 | 0.133 | 1.183 | 0.074 | 0.725 | 0.056 | 1.034 | 0.062 |
| 1384000_at   | BF560932 | Transcribed locus | --- | 0.750 | 0.134 | 0.651 | 0.450 | 0.472 | 0.004 | 0.716 | 0.633 |
| 1375538_at   | AI230737 | Transcribed locus | --- | 1.474 | 0.134 | 1.574 | 0.022 | 0.884 | 0.916 | 1.310 | 0.024 |
| 1379274_at   | AW535515 | Transcribed locus | --- | 0.793 | 0.134 | 0.499 | 0.002 | 0.809 | 0.048 | 0.691 | 0.160 |
| 1398481_at   | BF402699 | Transcribed locus | --- | 1.293 | 0.135 | 0.451 | 0.003 | 1.334 | 0.193 | 0.758 | 0.059 |
| 1372164_at   | AI600255 | Transcribed locus | --- | 1.396 | 0.135 | 0.860 | 0.831 | 0.978 | 0.998 | 0.885 | 0.980 |
| 1384680_at   | AA924336 | Transcribed locus | --- | 1.007 | 0.135 | 0.824 | 0.066 | 0.993 | 0.811 | 0.689 | 0.053 |
| 1384607_at   | BE120546 | Transcribed locus | --- | 0.699 | 0.135 | 1.017 | 0.821 | 0.703 | 0.139 | 0.997 | 0.967 |
| 1373818_at   | AI408351 | Transcribed locus | --- | 0.443 | 0.136 | 0.236 | 0.004 | 0.181 | 0.006 | 0.451 | 0.017 |

|              |          |                   |     |       |       |       |       |       |       |       |       |
|--------------|----------|-------------------|-----|-------|-------|-------|-------|-------|-------|-------|-------|
| 1372292_at   | AI009732 | Transcribed locus | --- | 0.431 | 0.137 | 0.240 | 0.001 | 0.394 | 0.000 | 0.295 | 0.001 |
| 1394029_at   | BF283049 | Transcribed locus | --- | 0.460 | 0.137 | 0.630 | 0.032 | 0.394 | 0.038 | 0.686 | 0.188 |
| 1378536_at   | AI638960 | Transcribed locus | --- | 0.787 | 0.137 | 0.994 | 0.921 | 0.813 | 0.170 | 1.068 | 0.639 |
| 1373129_at   | BF388415 | Transcribed locus | --- | 0.510 | 0.137 | 0.641 | 0.241 | 1.040 | 0.247 | 0.748 | 0.311 |
| 1389049_at   | BM382847 | Transcribed locus | --- | 0.706 | 0.137 | 0.402 | 0.061 | 0.701 | 0.857 | 0.543 | 0.235 |
| 1391145_at   | BE112120 | Transcribed locus | --- | 0.535 | 0.137 | 0.814 | 0.132 | 0.602 | 0.156 | 0.931 | 0.425 |
| 1389579_at   | BI284372 | Transcribed locus | --- | 0.733 | 0.137 | 0.727 | 0.164 | 0.706 | 0.114 | 0.702 | 0.087 |
| 1383338_at   | AA875190 | Transcribed locus | --- | 1.272 | 0.138 | 1.716 | 0.001 | 1.338 | 0.079 | 1.850 | 0.001 |
| 1383064_at   | AI137878 | Transcribed locus | --- | 0.658 | 0.138 | 0.567 | 0.068 | 0.851 | 0.102 | 0.613 | 0.001 |
| 1378345_at   | BF389196 | Transcribed locus | --- | 0.518 | 0.139 | 0.521 | 0.013 | 0.487 | 0.015 | 0.530 | 0.015 |
| 1394993_at   | AW531339 | Transcribed locus | --- | 1.327 | 0.139 | 1.159 | 0.570 | 1.001 | 0.986 | 0.849 | 0.044 |
| 1392490_at   | BM390676 | Transcribed locus | --- | 0.557 | 0.139 | 0.553 | 0.019 | 0.518 | 0.034 | 0.527 | 0.004 |
| 1385643_at   | AI045069 | Transcribed locus | --- | 1.173 | 0.139 | 0.896 | 0.282 | 0.831 | 0.856 | 1.228 | 0.242 |
| 1394153_at   | AA858641 | Transcribed locus | --- | 0.512 | 0.139 | 0.214 | 0.030 | 0.507 | 0.138 | 0.480 | 0.069 |
| 1381686_at   | BI276419 | Transcribed locus | --- | 1.096 | 0.140 | 1.309 | 0.160 | 1.202 | 0.068 | 1.236 | 0.985 |
| 1392764_at   | BE115434 | Transcribed locus | --- | 0.765 | 0.141 | 0.681 | 0.069 | 0.764 | 0.227 | 0.681 | 0.122 |
| 1371999_at   | BI303641 | Transcribed locus | --- | 0.374 | 0.141 | 0.187 | 0.005 | 0.712 | 0.003 | 0.196 | 0.022 |
| 1396993_at   | BM390929 | Transcribed locus | --- | 1.609 | 0.141 | 1.018 | 0.829 | 5.123 | 0.017 | 1.225 | 0.091 |
| 1383190_at   | BE113297 | Transcribed locus | --- | 0.895 | 0.142 | 0.828 | 0.283 | 0.892 | 0.036 | 0.892 | 0.162 |
| 1390512_at   | AI170376 | Transcribed locus | --- | 1.324 | 0.142 | 0.851 | 0.327 | 4.367 | 0.068 | 2.531 | 0.047 |
| 1381685_a_at | BI276419 | Transcribed locus | --- | 1.269 | 0.142 | 1.692 | 0.010 | 1.114 | 0.306 | 1.882 | 0.014 |
| 1384648_at   | AA963844 | Transcribed locus | --- | 1.163 | 0.142 | 0.794 | 0.095 | 2.002 | 0.144 | 1.042 | 0.762 |
| 1380340_at   | BF387865 | Transcribed locus | --- | 2.769 | 0.142 | 1.026 | 0.930 | 0.918 | 0.848 | 1.062 | 0.394 |
| 1379494_at   | AI012029 | Transcribed locus | --- | 0.796 | 0.143 | 0.753 | 0.089 | 0.800 | 0.244 | 0.969 | 0.360 |
| 1383963_at   | AW521925 | Transcribed locus | --- | 1.333 | 0.144 | 1.587 | 0.015 | 0.872 | 0.215 | 1.122 | 0.206 |
| 1381414_at   | AA964872 | Transcribed locus | --- | 1.469 | 0.144 | 1.162 | 0.583 | 0.834 | 0.312 | 0.771 | 0.509 |
| 1390335_at   | AW252589 | Transcribed locus | --- | 1.274 | 0.144 | 1.807 | 0.014 | 1.056 | 0.746 | 1.523 | 0.021 |
| 1390475_at   | AI412632 | Transcribed locus | --- | 0.613 | 0.144 | 0.880 | 0.569 | 1.037 | 0.714 | 0.708 | 0.554 |
| 1392046_at   | BE121124 | Transcribed locus | --- | 0.563 | 0.144 | 1.089 | 0.718 | 1.096 | 0.592 | 1.177 | 0.971 |
| 1378824_at   | BF389173 | Transcribed locus | --- | 0.602 | 0.144 | 0.399 | 0.046 | 0.977 | 0.874 | 0.400 | 0.050 |
| 1372524_at   | BG378238 | Transcribed locus | --- | 0.851 | 0.145 | 0.710 | 0.014 | 0.558 | 0.001 | 0.817 | 0.364 |
| 1398051_at   | BF392993 | Transcribed locus | --- | 0.853 | 0.145 | 1.267 | 0.329 | 0.854 | 0.584 | 1.457 | 0.254 |
| 1376453_at   | BF419074 | Transcribed locus | --- | 0.790 | 0.146 | 0.996 | 0.955 | 0.983 | 0.138 | 0.996 | 0.896 |
| 1398935_at   | AI009819 | Transcribed locus | --- | 0.871 | 0.147 | 0.854 | 0.185 | 0.694 | 0.230 | 0.830 | 0.007 |
| 1372912_at   | AA851280 | Transcribed locus | --- | 1.242 | 0.147 | 0.908 | 0.541 | 0.886 | 0.925 | 1.339 | 0.011 |
| 1396844_at   | AI547818 | Transcribed locus | --- | 1.359 | 0.147 | 1.367 | 0.019 | 1.123 | 0.820 | 1.207 | 0.275 |
| 1373825_at   | BG373078 | Transcribed locus | --- | 0.829 | 0.147 | 1.129 | 0.184 | 1.002 | 0.860 | 0.880 | 0.742 |
| 1378620_at   | BE104164 | Transcribed locus | --- | 0.681 | 0.147 | 0.457 | 0.015 | 1.024 | 0.235 | 0.533 | 0.051 |
| 1399122_at   | BI278603 | Transcribed locus | --- | 1.417 | 0.147 | 1.091 | 0.440 | 2.738 | 0.023 | 1.483 | 0.025 |
| 1382317_at   | AI408597 | Transcribed locus | --- | 1.476 | 0.148 | 2.538 | 0.004 | 1.315 | 0.232 | 2.479 | 0.003 |
| 1382824_at   | AI059884 | Transcribed locus | --- | 1.488 | 0.148 | 1.224 | 0.178 | 1.009 | 0.520 | 1.072 | 0.137 |
| 1376834_at   | AI407992 | Transcribed locus | --- | 0.734 | 0.148 | 0.882 | 0.229 | 0.729 | 0.550 | 0.948 | 0.102 |
| 1376686_at   | BI279363 | Transcribed locus | --- | 0.453 | 0.148 | 1.550 | 0.009 | 0.361 | 0.027 | 1.223 | 0.430 |
| 1395455_at   | AI713082 | Transcribed locus | --- | 0.634 | 0.148 | 0.729 | 0.064 | 0.620 | 0.217 | 0.985 | 0.699 |
| 1382594_at   | AI113090 | Transcribed locus | --- | 0.854 | 0.149 | 0.245 | 0.024 | 0.796 | 0.378 | 0.197 | 0.039 |
| 1389486_at   | BE108354 | Transcribed locus | --- | 0.645 | 0.150 | 0.249 | 0.002 | 0.421 | 0.003 | 0.326 | 0.015 |
| 1395909_at   | BE105118 | Transcribed locus | --- | 1.010 | 0.150 | 0.795 | 0.026 | 1.001 | 0.971 | 0.803 | 0.008 |
| 1388580_at   | AI100850 | Transcribed locus | --- | 0.702 | 0.150 | 0.627 | 0.000 | 0.744 | 0.102 | 0.718 | 0.002 |
| 1390916_at   | AI407187 | Transcribed locus | --- | 0.848 | 0.150 | 0.676 | 0.211 | 1.075 | 0.615 | 0.851 | 0.837 |
| 1380379_at   | AI228000 | Transcribed locus | --- | 0.577 | 0.150 | 0.489 | 0.007 | 0.623 | 0.030 | 0.531 | 0.011 |
| 1383637_at   | AA925807 | Transcribed locus | --- | 1.402 | 0.150 | 1.084 | 0.293 | 1.087 | 0.059 | 0.990 | 0.997 |
| 1396077_at   | BF554876 | Transcribed locus | --- | 2.723 | 0.150 | 0.719 | 0.165 | 3.230 | 0.013 | 1.039 | 0.448 |
| 1381078_at   | BF409999 | Transcribed locus | --- | 0.839 | 0.151 | 0.994 | 0.947 | 0.843 | 0.157 | 0.995 | 0.998 |
| 1380640_at   | BM389373 | Transcribed locus | --- | 1.001 | 0.151 | 0.983 | 0.979 | 0.771 | 0.080 | 1.231 | 0.993 |
| 1374833_at   | BF290953 | Transcribed locus | --- | 0.639 | 0.152 | 0.175 | 0.002 | 0.749 | 0.339 | 0.222 | 0.005 |
| 1376401_at   | AI412569 | Transcribed locus | --- | 1.315 | 0.152 | 2.109 | 0.008 | 0.910 | 0.196 | 1.999 | 0.009 |
| 1395745_at   | AI113308 | Transcribed locus | --- | 0.836 | 0.152 | 0.308 | 0.005 | 0.478 | 0.151 | 0.380 | 0.010 |
| 1377165_at   | BF420664 | Transcribed locus | --- | 0.469 | 0.152 | 0.229 | 0.001 | 0.365 | 0.019 | 0.401 | 0.000 |
| 1383051_at   | AW915925 | Transcribed locus | --- | 1.174 | 0.153 | 0.945 | 0.684 | 0.667 | 0.106 | 0.850 | 0.127 |
| 1393961_at   | AA926088 | Transcribed locus | --- | 0.304 | 0.153 | 0.829 | 0.048 | 0.275 | 0.093 | 0.652 | 0.016 |
| 1372750_at   | AI102517 | Transcribed locus | --- | 0.547 | 0.153 | 0.796 | 0.195 | 0.457 | 0.072 | 1.265 | 0.309 |

|              |          |                   |     |       |       |       |       |       |       |       |       |
|--------------|----------|-------------------|-----|-------|-------|-------|-------|-------|-------|-------|-------|
| 1381592_at   | AA926244 | Transcribed locus | --- | 0.609 | 0.153 | 0.671 | 0.095 | 0.924 | 0.757 | 0.637 | 0.109 |
| 1390536_at   | BF551311 | Transcribed locus | --- | 0.457 | 0.153 | 0.264 | 0.076 | 0.541 | 0.159 | 0.314 | 0.028 |
| 1381575_at   | AI638986 | Transcribed locus | --- | 2.761 | 0.153 | 2.038 | 0.159 | 1.011 | 0.797 | 1.761 | 0.061 |
| 1373367_at   | AI556297 | Transcribed locus | --- | 0.811 | 0.154 | 0.557 | 0.000 | 0.752 | 0.123 | 0.653 | 0.000 |
| 1375462_at   | BE109177 | Transcribed locus | --- | 0.794 | 0.154 | 0.845 | 0.668 | 0.648 | 0.110 | 0.799 | 0.025 |
| 1376679_at   | AI556021 | Transcribed locus | --- | 0.754 | 0.154 | 0.938 | 0.241 | 0.849 | 0.022 | 0.907 | 0.098 |
| 1376906_at   | BM391974 | Transcribed locus | --- | 2.163 | 0.154 | 1.968 | 0.007 | 1.765 | 0.138 | 1.615 | 0.057 |
| 1392507_at   | AI385280 | Transcribed locus | --- | 0.566 | 0.155 | 0.896 | 0.243 | 0.521 | 0.079 | 0.737 | 0.036 |
| 1390983_at   | AA956823 | Transcribed locus | --- | 1.158 | 0.155 | 1.182 | 0.432 | 1.957 | 0.628 | 0.734 | 0.309 |
| 1371517_at   | BF283627 | Transcribed locus | --- | 1.980 | 0.155 | 1.648 | 0.083 | 0.700 | 0.674 | 0.791 | 0.436 |
| 1395574_at   | BE118358 | Transcribed locus | --- | 2.090 | 0.155 | 1.125 | 0.238 | 1.220 | 0.506 | 1.169 | 0.239 |
| 1385261_s_at | BE103057 | Transcribed locus | --- | 1.433 | 0.156 | 0.479 | 0.086 | 1.283 | 0.370 | 0.814 | 0.208 |
| 1383810_at   | AA955678 | Transcribed locus | --- | 0.499 | 0.156 | 0.630 | 0.254 | 0.332 | 0.076 | 0.629 | 0.464 |
| 1395953_at   | AA955517 | Transcribed locus | --- | 0.354 | 0.157 | 0.610 | 0.095 | 0.361 | 0.075 | 0.683 | 0.054 |
| 1374327_at   | AW531530 | Transcribed locus | --- | 1.073 | 0.157 | 1.495 | 0.206 | 1.459 | 0.309 | 1.284 | 0.156 |
| 1372849_at   | AI229183 | Transcribed locus | --- | 0.512 | 0.157 | 0.251 | 0.020 | 0.640 | 0.026 | 0.356 | 0.000 |
| 1388734_at   | AA894193 | Transcribed locus | --- | 0.750 | 0.157 | 0.925 | 0.419 | 0.951 | 0.751 | 0.944 | 0.958 |
| 1389392_at   | BF399468 | Transcribed locus | --- | 1.125 | 0.157 | 1.104 | 0.393 | 1.090 | 0.207 | 0.974 | 0.703 |
| 1374783_at   | BI301183 | Transcribed locus | --- | 0.865 | 0.157 | 1.192 | 0.083 | 0.848 | 0.119 | 0.852 | 0.404 |
| 1385773_at   | BF416395 | Transcribed locus | --- | 1.175 | 0.157 | 0.416 | 0.066 | 1.139 | 0.072 | 0.376 | 0.046 |
| 1382915_at   | AI237079 | Transcribed locus | --- | 1.588 | 0.157 | 1.120 | 0.147 | 1.618 | 0.013 | 1.254 | 0.006 |
| 1382791_at   | AI716238 | Transcribed locus | --- | 1.594 | 0.158 | 1.379 | 0.075 | 1.415 | 0.411 | 2.372 | 0.125 |
| 1374093_at   | BE108840 | Transcribed locus | --- | 0.808 | 0.158 | 0.371 | 0.014 | 1.325 | 0.273 | 0.550 | 0.044 |
| 1384896_at   | AA997660 | Transcribed locus | --- | 1.295 | 0.158 | 0.460 | 0.087 | 1.470 | 0.046 | 1.098 | 0.420 |
| 1394160_at   | AI101945 | Transcribed locus | --- | 1.573 | 0.158 | 0.784 | 0.095 | 2.093 | 0.037 | 0.697 | 0.011 |
| 1396023_at   | AW522736 | Transcribed locus | --- | 1.549 | 0.158 | 1.215 | 0.232 | 1.463 | 0.221 | 1.432 | 0.434 |
| 1386470_at   | H33577   | Transcribed locus | --- | 0.574 | 0.159 | 1.046 | 0.764 | 1.139 | 0.300 | 1.008 | 0.941 |
| 1395904_at   | BF388148 | Transcribed locus | --- | 2.498 | 0.159 | 0.490 | 0.191 | 1.837 | 0.136 | 0.563 | 0.038 |
| 1383575_at   | BG376561 | Transcribed locus | --- | 0.774 | 0.159 | 0.767 | 0.628 | 0.554 | 0.119 | 0.566 | 0.034 |
| 1382891_at   | BE108241 | Transcribed locus | --- | 1.502 | 0.159 | 1.099 | 0.494 | 1.018 | 0.929 | 0.999 | 0.996 |
| 1375349_at   | BI295776 | Transcribed locus | --- | 1.623 | 0.159 | 1.032 | 0.182 | 4.340 | 0.011 | 2.162 | 0.052 |
| 1396029_at   | BE120584 | Transcribed locus | --- | 1.141 | 0.159 | 0.966 | 0.902 | 0.318 | 0.057 | 1.040 | 0.823 |
| 1371903_at   | BM384012 | Transcribed locus | --- | 0.559 | 0.160 | 0.940 | 0.808 | 0.274 | 0.026 | 0.797 | 0.410 |
| 1392509_at   | AA925469 | Transcribed locus | --- | 1.248 | 0.161 | 1.087 | 0.156 | 1.265 | 0.710 | 1.366 | 0.175 |
| 1382609_at   | AI058451 | Transcribed locus | --- | 1.811 | 0.161 | 1.837 | 0.141 | 1.319 | 0.230 | 1.217 | 0.486 |
| 1381857_at   | AA963157 | Transcribed locus | --- | 1.396 | 0.161 | 0.688 | 0.008 | 0.808 | 0.864 | 0.909 | 0.228 |
| 1385467_at   | BF388485 | Transcribed locus | --- | 0.704 | 0.162 | 1.000 | 0.510 | 0.832 | 0.206 | 1.107 | 0.043 |
| 1382412_at   | BM389786 | Transcribed locus | --- | 1.114 | 0.162 | 0.832 | 0.048 | 1.274 | 0.331 | 0.927 | 0.337 |
| 1382131_at   | AW523674 | Transcribed locus | --- | 1.074 | 0.163 | 0.886 | 0.307 | 1.286 | 0.032 | 0.847 | 0.441 |
| 1385868_at   | AA875124 | Transcribed locus | --- | 0.676 | 0.164 | 0.846 | 0.540 | 0.496 | 0.079 | 1.047 | 0.806 |
| 1374052_at   | AI599270 | Transcribed locus | --- | 1.398 | 0.164 | 1.361 | 0.059 | 1.410 | 0.252 | 1.281 | 0.076 |
| 1382564_at   | AI233574 | Transcribed locus | --- | 0.808 | 0.164 | 1.360 | 0.093 | 0.669 | 0.062 | 1.593 | 0.061 |
| 1376242_at   | BF402365 | Transcribed locus | --- | 0.548 | 0.164 | 0.208 | 0.000 | 1.087 | 0.181 | 0.257 | 0.036 |
| 1374559_at   | AI171211 | Transcribed locus | --- | 0.508 | 0.164 | 0.538 | 0.004 | 0.354 | 0.042 | 0.586 | 0.019 |
| 1392603_at   | AI717425 | Transcribed locus | --- | 0.650 | 0.165 | 2.487 | 0.004 | 0.542 | 0.254 | 2.151 | 0.012 |
| 1372414_at   | BI281979 | Transcribed locus | --- | 1.027 | 0.165 | 1.047 | 0.522 | 1.024 | 0.245 | 1.072 | 0.636 |
| 1383576_at   | AW917643 | Transcribed locus | --- | 1.355 | 0.165 | 0.982 | 0.403 | 0.934 | 0.994 | 1.061 | 0.768 |
| 1373165_at   | BF404539 | Transcribed locus | --- | 0.589 | 0.165 | 0.057 | 0.001 | 0.663 | 0.863 | 0.192 | 0.006 |
| 1385732_at   | BE115744 | Transcribed locus | --- | 1.276 | 0.166 | 0.506 | 0.066 | 0.986 | 0.995 | 0.535 | 0.009 |
| 1377021_at   | BI303908 | Transcribed locus | --- | 0.502 | 0.166 | 1.176 | 0.668 | 0.685 | 0.089 | 1.128 | 0.778 |
| 1380766_a_at | BF389689 | Transcribed locus | --- | 0.939 | 0.166 | 0.959 | 0.703 | 0.987 | 0.863 | 0.995 | 0.663 |
| 1374633_at   | BF284700 | Transcribed locus | --- | 0.795 | 0.166 | 0.146 | 0.000 | 0.393 | 0.017 | 0.163 | 0.016 |
| 1382032_at   | AI407730 | Transcribed locus | --- | 0.733 | 0.167 | 0.228 | 0.002 | 0.303 | 0.040 | 0.538 | 0.037 |
| 1376153_at   | BE102621 | Transcribed locus | --- | 1.098 | 0.167 | 0.994 | 0.944 | 1.320 | 0.156 | 0.955 | 0.787 |
| 1384546_at   | AA924204 | Transcribed locus | --- | 1.175 | 0.167 | 3.018 | 0.014 | 0.668 | 0.068 | 3.284 | 0.015 |
| 1395922_at   | BF412539 | Transcribed locus | --- | 0.777 | 0.168 | 0.662 | 0.264 | 0.896 | 0.671 | 0.479 | 0.663 |
| 1374421_at   | AA850752 | Transcribed locus | --- | 1.072 | 0.168 | 1.079 | 0.496 | 1.191 | 0.457 | 1.034 | 0.135 |
| 1392618_at   | BG379597 | Transcribed locus | --- | 1.181 | 0.168 | 1.075 | 0.793 | 1.904 | 0.131 | 1.434 | 0.118 |
| 1393192_at   | AW528963 | Transcribed locus | --- | 0.480 | 0.169 | 0.229 | 0.000 | 0.631 | 0.142 | 0.459 | 0.001 |
| 1391407_at   | BF392634 | Transcribed locus | --- | 2.440 | 0.169 | 1.704 | 0.242 | 1.986 | 0.500 | 1.200 | 0.026 |
| 1378325_at   | BE098737 | Transcribed locus | --- | 2.069 | 0.169 | 0.354 | 0.004 | 2.618 | 0.097 | 0.358 | 0.005 |

|              |          |                   |     |       |       |       |       |       |       |       |       |
|--------------|----------|-------------------|-----|-------|-------|-------|-------|-------|-------|-------|-------|
| 1391589_at   | BM385772 | Transcribed locus | --- | 1.108 | 0.169 | 0.718 | 0.103 | 1.458 | 0.018 | 0.849 | 0.198 |
| 1372079_at   | AI410099 | Transcribed locus | --- | 1.116 | 0.169 | 0.922 | 0.035 | 1.088 | 0.182 | 1.037 | 0.633 |
| 1378139_at   | AI412468 | Transcribed locus | --- | 1.420 | 0.169 | 0.360 | 0.017 | 1.211 | 0.980 | 0.359 | 0.012 |
| 1373439_at   | AI178491 | Transcribed locus | --- | 1.163 | 0.169 | 1.736 | 0.022 | 1.284 | 0.255 | 1.347 | 0.032 |
| 1382651_at   | AA998677 | Transcribed locus | --- | 0.303 | 0.169 | 0.062 | 0.014 | 0.579 | 0.182 | 0.068 | 0.019 |
| 1378395_at   | BF411826 | Transcribed locus | --- | 0.596 | 0.170 | 0.373 | 0.004 | 0.512 | 0.015 | 0.504 | 0.073 |
| 1371477_at   | BG380735 | Transcribed locus | --- | 1.142 | 0.170 | 1.333 | 0.367 | 1.142 | 0.352 | 1.359 | 0.116 |
| 1391923_at   | BG376838 | Transcribed locus | --- | 0.373 | 0.170 | 0.113 | 0.000 | 0.530 | 0.033 | 0.170 | 0.019 |
| 1382404_at   | BG669741 | Transcribed locus | --- | 2.003 | 0.170 | 2.392 | 0.004 | 1.597 | 0.038 | 1.937 | 0.019 |
| 1397822_at   | BF554794 | Transcribed locus | --- | 0.398 | 0.170 | 0.865 | 0.803 | 1.097 | 0.225 | 0.455 | 0.268 |
| 1384708_at   | BF400572 | Transcribed locus | --- | 0.471 | 0.170 | 0.354 | 0.010 | 0.148 | 0.037 | 0.123 | 0.048 |
| 1381075_at   | AA956937 | Transcribed locus | --- | 0.816 | 0.170 | 0.522 | 0.002 | 0.951 | 0.641 | 0.479 | 0.007 |
| 1384821_at   | AI511134 | Transcribed locus | --- | 0.550 | 0.170 | 0.984 | 0.324 | 1.387 | 0.108 | 1.094 | 0.320 |
| 1380466_at   | BG670778 | Transcribed locus | --- | 0.748 | 0.171 | 1.042 | 0.233 | 0.264 | 0.001 | 0.725 | 0.088 |
| 1391526_at   | AI029006 | Transcribed locus | --- | 1.260 | 0.171 | 0.928 | 0.477 | 1.025 | 0.076 | 0.649 | 0.187 |
| 1383869_at   | AI071350 | Transcribed locus | --- | 1.680 | 0.171 | 1.232 | 0.016 | 1.281 | 0.297 | 1.738 | 0.000 |
| 1396676_at   | BF394718 | Transcribed locus | --- | 1.862 | 0.172 | 1.044 | 0.779 | 1.018 | 0.925 | 1.074 | 0.175 |
| 1393806_at   | BE107400 | Transcribed locus | --- | 1.063 | 0.172 | 0.818 | 0.233 | 1.195 | 0.290 | 1.328 | 0.479 |
| 1382205_at   | AW527509 | Transcribed locus | --- | 0.812 | 0.173 | 1.926 | 0.177 | 0.821 | 0.618 | 2.247 | 0.072 |
| 1389790_at   | AI410565 | Transcribed locus | --- | 2.638 | 0.174 | 1.872 | 0.008 | 2.773 | 0.012 | 2.444 | 0.005 |
| 1394460_at   | BF564428 | Transcribed locus | --- | 1.162 | 0.175 | 0.276 | 0.006 | 1.720 | 0.014 | 0.610 | 0.018 |
| 1396448_at   | BE119407 | Transcribed locus | --- | 1.532 | 0.175 | 1.354 | 0.057 | 1.573 | 0.045 | 1.597 | 0.088 |
| 1384690_at   | AI071329 | Transcribed locus | --- | 0.473 | 0.175 | 1.014 | 0.328 | 0.483 | 0.172 | 1.316 | 0.530 |
| 1392598_at   | AA899326 | Transcribed locus | --- | 1.071 | 0.176 | 0.934 | 0.513 | 0.754 | 0.506 | 1.022 | 0.119 |
| 1391773_at   | BM390802 | Transcribed locus | --- | 0.777 | 0.176 | 0.433 | 0.003 | 0.680 | 0.033 | 0.588 | 0.019 |
| 1371867_at   | BE120836 | Transcribed locus | --- | 1.324 | 0.176 | 0.967 | 0.961 | 1.306 | 0.169 | 1.077 | 0.310 |
| 1383434_at   | AA997640 | Transcribed locus | --- | 0.666 | 0.177 | 0.711 | 0.008 | 0.636 | 0.029 | 0.436 | 0.065 |
| 1385723_at   | BE097133 | Transcribed locus | --- | 1.752 | 0.177 | 0.512 | 0.157 | 1.338 | 0.256 | 1.000 | 0.186 |
| 1374820_at   | AI598946 | Transcribed locus | --- | 0.679 | 0.177 | 1.091 | 0.639 | 0.802 | 0.241 | 1.391 | 0.045 |
| 1398335_at   | BI285665 | Transcribed locus | --- | 0.717 | 0.177 | 0.441 | 0.029 | 0.785 | 0.214 | 0.611 | 0.058 |
| 1385429_at   | AA957452 | Transcribed locus | --- | 0.733 | 0.177 | 0.815 | 0.409 | 0.841 | 0.426 | 1.016 | 0.637 |
| 1393342_at   | BG380998 | Transcribed locus | --- | 0.636 | 0.178 | 0.482 | 0.004 | 0.782 | 0.764 | 0.605 | 0.002 |
| 1377711_at   | BF284137 | Transcribed locus | --- | 0.891 | 0.178 | 0.660 | 0.030 | 0.470 | 0.470 | 0.481 | 0.015 |
| 1379874_at   | BE107929 | Transcribed locus | --- | 0.796 | 0.178 | 0.476 | 0.007 | 0.675 | 0.209 | 0.414 | 0.015 |
| 1384875_at   | AW529951 | Transcribed locus | --- | 1.547 | 0.179 | 0.405 | 0.177 | 1.582 | 0.459 | 0.494 | 0.080 |
| 1376097_at   | BF416935 | Transcribed locus | --- | 1.203 | 0.179 | 0.782 | 0.587 | 1.814 | 0.048 | 0.986 | 0.274 |
| 1396057_at   | AW521804 | Transcribed locus | --- | 0.903 | 0.180 | 0.548 | 0.005 | 0.940 | 0.099 | 0.563 | 0.006 |
| 1376173_at   | BI292125 | Transcribed locus | --- | 0.662 | 0.180 | 1.140 | 0.064 | 0.878 | 0.044 | 1.129 | 0.086 |
| 1390248_at   | AW142935 | Transcribed locus | --- | 1.496 | 0.180 | 1.001 | 0.965 | 1.011 | 0.687 | 0.999 | 0.992 |
| 1396330_at   | AW526516 | Transcribed locus | --- | 0.610 | 0.180 | 0.969 | 0.942 | 1.008 | 0.247 | 0.989 | 0.935 |
| 1375841_at   | BI282607 | Transcribed locus | --- | 0.750 | 0.180 | 0.346 | 0.000 | 0.907 | 0.597 | 0.576 | 0.008 |
| 1384812_at   | AI229409 | Transcribed locus | --- | 0.664 | 0.181 | 0.861 | 0.081 | 0.796 | 0.182 | 0.773 | 0.169 |
| 1389976_at   | BE109682 | Transcribed locus | --- | 0.905 | 0.181 | 0.783 | 0.644 | 0.998 | 0.193 | 0.796 | 0.798 |
| 1389297_at   | AI146215 | Transcribed locus | --- | 0.469 | 0.182 | 1.154 | 0.974 | 0.493 | 0.003 | 0.958 | 0.168 |
| 1376991_at   | BE095620 | Transcribed locus | --- | 1.281 | 0.182 | 0.749 | 0.288 | 1.040 | 0.645 | 0.678 | 0.125 |
| 1385876_at   | AA817826 | Transcribed locus | --- | 1.049 | 0.183 | 1.612 | 0.812 | 0.688 | 0.035 | 1.107 | 0.981 |
| 1392101_s_at | AI175670 | Transcribed locus | --- | 0.809 | 0.183 | 1.187 | 0.101 | 0.978 | 0.906 | 1.237 | 0.015 |
| 1393206_at   | BM383684 | Transcribed locus | --- | 1.177 | 0.183 | 0.735 | 0.038 | 1.786 | 0.032 | 0.921 | 0.191 |
| 1375484_at   | BG376458 | Transcribed locus | --- | 0.669 | 0.184 | 0.825 | 0.364 | 0.959 | 0.687 | 0.642 | 0.034 |
| 1377934_at   | BF387289 | Transcribed locus | --- | 0.860 | 0.184 | 0.827 | 0.302 | 0.601 | 0.097 | 0.726 | 0.189 |
| 1373252_at   | AI411930 | Transcribed locus | --- | 1.934 | 0.184 | 4.219 | 0.005 | 2.816 | 0.118 | 4.555 | 0.003 |
| 1388495_at   | BI303583 | Transcribed locus | --- | 0.877 | 0.184 | 0.506 | 0.013 | 1.042 | 0.069 | 0.464 | 0.003 |
| 1391460_at   | BF408186 | Transcribed locus | --- | 1.052 | 0.186 | 0.694 | 0.024 | 1.248 | 0.340 | 0.981 | 0.549 |
| 1378517_at   | AI176472 | Transcribed locus | --- | 0.423 | 0.187 | 1.179 | 0.069 | 1.481 | 0.405 | 1.745 | 0.186 |
| 1376428_at   | BF412631 | Transcribed locus | --- | 0.902 | 0.187 | 1.007 | 0.926 | 0.968 | 0.535 | 1.229 | 0.996 |
| 1373807_at   | AI175732 | Transcribed locus | --- | 1.011 | 0.187 | 0.960 | 0.580 | 1.095 | 0.944 | 1.020 | 0.174 |
| 1385901_at   | BE118197 | Transcribed locus | --- | 1.434 | 0.187 | 0.512 | 0.006 | 1.317 | 0.284 | 0.772 | 0.032 |
| 1391725_at   | BI289277 | Transcribed locus | --- | 1.168 | 0.187 | 0.418 | 0.023 | 0.872 | 0.712 | 0.539 | 0.227 |
| 1389724_at   | BI274507 | Transcribed locus | --- | 1.227 | 0.187 | 0.991 | 0.227 | 0.726 | 0.534 | 0.805 | 0.078 |
| 1376022_at   | BI292196 | Transcribed locus | --- | 1.516 | 0.188 | 0.913 | 0.327 | 3.205 | 0.013 | 1.480 | 0.030 |
| 1375016_at   | AI406912 | Transcribed locus | --- | 0.854 | 0.188 | 0.739 | 0.080 | 0.758 | 0.042 | 0.850 | 0.095 |

|              |          |                   |     |       |       |       |       |       |       |       |       |
|--------------|----------|-------------------|-----|-------|-------|-------|-------|-------|-------|-------|-------|
| 1384261_at   | AI072173 | Transcribed locus | --- | 0.790 | 0.188 | 0.627 | 0.020 | 0.933 | 0.802 | 0.546 | 0.010 |
| 1391821_at   | BF391706 | Transcribed locus | --- | 0.914 | 0.188 | 1.090 | 0.346 | 1.100 | 0.544 | 1.092 | 0.352 |
| 1373218_at   | BG381051 | Transcribed locus | --- | 1.502 | 0.188 | 1.165 | 0.615 | 0.999 | 0.959 | 0.859 | 0.992 |
| 1381948_at   | AI547876 | Transcribed locus | --- | 1.392 | 0.188 | 0.437 | 0.086 | 3.282 | 0.018 | 0.667 | 0.102 |
| 1389397_at   | AI234012 | Transcribed locus | --- | 0.684 | 0.189 | 0.800 | 0.015 | 0.673 | 0.014 | 0.744 | 0.015 |
| 1382347_at   | AA850576 | Transcribed locus | --- | 2.073 | 0.189 | 0.755 | 0.092 | 1.675 | 0.028 | 1.113 | 0.464 |
| 1386798_at   | BF552068 | Transcribed locus | --- | 1.678 | 0.189 | 0.604 | 0.048 | 1.963 | 0.214 | 0.919 | 0.149 |
| 1373221_at   | BI278478 | Transcribed locus | --- | 1.384 | 0.189 | 1.485 | 0.006 | 1.403 | 0.220 | 1.333 | 0.017 |
| 1373285_at   | AI406624 | Transcribed locus | --- | 1.591 | 0.190 | 0.588 | 0.024 | 1.812 | 0.061 | 0.999 | 0.350 |
| 1380068_at   | AA964641 | Transcribed locus | --- | 0.525 | 0.190 | 0.704 | 0.511 | 0.828 | 0.075 | 0.683 | 0.012 |
| 1376622_at   | BM389574 | Transcribed locus | --- | 0.743 | 0.190 | 0.361 | 0.000 | 0.527 | 0.004 | 0.483 | 0.005 |
| 1392887_at   | AI575082 | Transcribed locus | --- | 0.585 | 0.190 | 0.218 | 0.022 | 0.610 | 0.037 | 0.360 | 0.136 |
| 1376706_at   | BG373822 | Transcribed locus | --- | 1.306 | 0.191 | 0.982 | 0.935 | 2.914 | 0.038 | 0.693 | 0.158 |
| 1372855_at   | BF287135 | Transcribed locus | --- | 0.797 | 0.191 | 0.237 | 0.009 | 0.843 | 0.424 | 0.286 | 0.011 |
| 1371986_at   | AI576652 | Transcribed locus | --- | 0.965 | 0.191 | 0.408 | 0.002 | 0.998 | 0.270 | 0.498 | 0.021 |
| 1377151_at   | AI102833 | Transcribed locus | --- | 1.973 | 0.191 | 2.877 | 0.008 | 1.861 | 0.027 | 5.355 | 0.013 |
| 1382835_at   | BM387260 | Transcribed locus | --- | 0.678 | 0.192 | 1.374 | 0.063 | 0.898 | 0.103 | 0.845 | 0.411 |
| 1379761_at   | BE104517 | Transcribed locus | --- | 0.586 | 0.193 | 2.548 | 0.007 | 0.549 | 0.077 | 1.152 | 0.150 |
| 1381091_at   | BE101556 | Transcribed locus | --- | 0.670 | 0.193 | 1.097 | 0.949 | 0.639 | 0.237 | 0.977 | 0.942 |
| 1383288_at   | BE117716 | Transcribed locus | --- | 1.482 | 0.193 | 2.811 | 0.010 | 1.115 | 0.550 | 2.506 | 0.022 |
| 1393959_at   | BI293249 | Transcribed locus | --- | 1.151 | 0.193 | 0.568 | 0.021 | 1.392 | 0.141 | 0.482 | 0.003 |
| 1388978_at   | BF283704 | Transcribed locus | --- | 0.655 | 0.193 | 0.552 | 0.001 | 0.830 | 0.184 | 0.662 | 0.001 |
| 1372717_at   | BI296012 | Transcribed locus | --- | 1.318 | 0.193 | 1.755 | 0.001 | 0.934 | 0.467 | 1.487 | 0.007 |
| 1395382_at   | AW522848 | Transcribed locus | --- | 0.745 | 0.193 | 0.950 | 0.175 | 0.734 | 0.084 | 0.877 | 0.057 |
| 1374123_at   | BM384680 | Transcribed locus | --- | 0.670 | 0.194 | 0.951 | 0.295 | 0.841 | 0.191 | 0.852 | 0.044 |
| 1393879_at   | BF391763 | Transcribed locus | --- | 0.740 | 0.194 | 0.363 | 0.015 | 0.667 | 0.111 | 0.518 | 0.083 |
| 1376584_at   | BE116408 | Transcribed locus | --- | 0.747 | 0.194 | 0.403 | 0.001 | 0.668 | 0.112 | 0.464 | 0.004 |
| 1388768_at   | BI285601 | Transcribed locus | --- | 1.306 | 0.194 | 1.054 | 0.498 | 2.062 | 0.067 | 1.231 | 0.449 |
| 1376946_at   | BG380358 | Transcribed locus | --- | 0.455 | 0.194 | 0.309 | 0.001 | 0.521 | 0.046 | 0.530 | 0.008 |
| 1389867_at   | BI281086 | Transcribed locus | --- | 1.099 | 0.195 | 0.544 | 0.005 | 1.250 | 0.240 | 0.703 | 0.027 |
| 1393743_at   | AI453930 | Transcribed locus | --- | 0.540 | 0.195 | 2.825 | 0.002 | 0.390 | 0.205 | 3.780 | 0.014 |
| 1398528_at   | BE117514 | Transcribed locus | --- | 1.243 | 0.195 | 1.040 | 0.813 | 1.244 | 0.169 | 0.752 | 0.364 |
| 1383280_at   | BG669130 | Transcribed locus | --- | 1.692 | 0.195 | 0.687 | 0.006 | 2.019 | 0.007 | 0.686 | 0.001 |
| 1371823_at   | BM392158 | Transcribed locus | --- | 0.835 | 0.195 | 0.528 | 0.001 | 0.800 | 0.073 | 0.618 | 0.004 |
| 1389479_at   | AI233750 | Transcribed locus | --- | 1.497 | 0.196 | 1.143 | 0.577 | 0.989 | 0.787 | 1.016 | 0.812 |
| 1397394_at   | BF412275 | Transcribed locus | --- | 0.866 | 0.196 | 1.116 | 0.608 | 0.577 | 0.191 | 1.185 | 0.876 |
| 1394487_at   | AW526344 | Transcribed locus | --- | 1.123 | 0.196 | 0.877 | 0.094 | 1.091 | 0.328 | 0.768 | 0.026 |
| 1377819_at   | AA955441 | Transcribed locus | --- | 1.017 | 0.196 | 0.730 | 0.012 | 1.412 | 0.263 | 0.802 | 0.011 |
| 1390889_at   | AI102132 | Transcribed locus | --- | 1.090 | 0.196 | 0.874 | 0.236 | 0.892 | 0.790 | 0.869 | 0.216 |
| 1385761_s_at | BF400633 | Transcribed locus | --- | 1.228 | 0.197 | 1.220 | 0.406 | 1.411 | 0.172 | 0.999 | 0.978 |
| 1389707_at   | AW251681 | Transcribed locus | --- | 0.390 | 0.197 | 0.509 | 0.008 | 0.305 | 0.016 | 0.590 | 0.018 |
| 1390239_at   | BE112417 | Transcribed locus | --- | 2.543 | 0.197 | 0.641 | 0.291 | 1.828 | 0.223 | 0.631 | 0.619 |
| 1382262_at   | BE111891 | Transcribed locus | --- | 1.642 | 0.197 | 0.951 | 0.782 | 1.872 | 0.158 | 0.868 | 0.765 |
| 1389776_at   | BE105589 | Transcribed locus | --- | 0.878 | 0.198 | 1.721 | 0.019 | 0.827 | 0.154 | 1.203 | 0.155 |
| 1398348_at   | AA945604 | Transcribed locus | --- | 1.557 | 0.198 | 1.708 | 0.187 | 1.975 | 0.010 | 0.873 | 0.862 |
| 1376778_at   | AI406670 | Transcribed locus | --- | 0.574 | 0.198 | 1.003 | 0.970 | 0.983 | 0.192 | 0.992 | 0.954 |
| 1395207_at   | AW527787 | Transcribed locus | --- | 1.687 | 0.198 | 0.673 | 0.235 | 1.411 | 0.127 | 0.828 | 0.398 |
| 1376588_at   | BF284632 | Transcribed locus | --- | 1.245 | 0.199 | 1.086 | 0.872 | 1.523 | 0.029 | 0.817 | 0.764 |
| 1389143_at   | BF288139 | Transcribed locus | --- | 0.929 | 0.199 | 0.846 | 0.021 | 1.066 | 0.964 | 0.865 | 0.031 |
| 1385891_at   | AI101553 | Transcribed locus | --- | 0.632 | 0.200 | 0.411 | 0.012 | 1.138 | 0.801 | 0.288 | 0.055 |
| 1376635_at   | BF283341 | Transcribed locus | --- | 0.811 | 0.200 | 0.842 | 0.381 | 0.331 | 0.013 | 0.520 | 0.099 |
| 1381940_at   | AW527798 | Transcribed locus | --- | 1.526 | 0.200 | 1.492 | 0.069 | 0.826 | 0.653 | 1.309 | 0.274 |
| 1383084_at   | BG671922 | Transcribed locus | --- | 0.652 | 0.200 | 0.314 | 0.003 | 0.899 | 0.671 | 0.423 | 0.003 |
| 1373836_at   | AI236582 | Transcribed locus | --- | 0.755 | 0.200 | 0.614 | 0.005 | 0.751 | 0.126 | 0.628 | 0.011 |
| 1375199_at   | BG378641 | Transcribed locus | --- | 1.263 | 0.202 | 1.401 | 0.891 | 1.521 | 0.149 | 0.598 | 0.072 |
| 1379408_at   | AW916148 | Transcribed locus | --- | 1.482 | 0.202 | 1.046 | 0.839 | 0.945 | 0.931 | 0.835 | 0.377 |
| 1392625_at   | AI578406 | Transcribed locus | --- | 0.995 | 0.203 | 1.001 | 0.972 | 1.000 | 0.844 | 1.001 | 0.780 |
| 1373021_at   | AI171823 | Transcribed locus | --- | 0.715 | 0.203 | 0.384 | 0.002 | 0.706 | 0.042 | 0.432 | 0.010 |
| 1378801_at   | AI599072 | Transcribed locus | --- | 1.931 | 0.204 | 1.034 | 0.937 | 1.452 | 0.370 | 0.927 | 0.918 |
| 1373967_at   | AI229311 | Transcribed locus | --- | 0.490 | 0.204 | 0.138 | 0.000 | 0.499 | 0.159 | 0.331 | 0.018 |
| 1388623_at   | BI277003 | Transcribed locus | --- | 1.092 | 0.205 | 1.211 | 0.110 | 0.999 | 0.996 | 0.859 | 0.270 |



|              |          |                   |     |       |       |       |       |       |       |       |       |
|--------------|----------|-------------------|-----|-------|-------|-------|-------|-------|-------|-------|-------|
| 1394488_at   | AW524157 | Transcribed locus | --- | 1.341 | 0.205 | 0.216 | 0.003 | 0.607 | 0.016 | 0.342 | 0.001 |
| 1390153_at   | BG378721 | Transcribed locus | --- | 0.604 | 0.205 | 0.386 | 0.000 | 0.503 | 0.014 | 0.358 | 0.021 |
| 1397563_at   | AW522171 | Transcribed locus | --- | 0.834 | 0.205 | 1.004 | 0.850 | 0.824 | 0.429 | 0.997 | 0.361 |
| 1389732_at   | BM386323 | Transcribed locus | --- | 1.522 | 0.206 | 3.112 | 0.006 | 1.891 | 0.109 | 1.952 | 0.037 |
| 1380529_at   | AI059721 | Transcribed locus | --- | 1.375 | 0.206 | 0.931 | 0.275 | 1.673 | 0.192 | 0.665 | 0.052 |
| 1393835_s_at | AA900738 | Transcribed locus | --- | 1.010 | 0.206 | 1.289 | 0.389 | 1.735 | 0.115 | 1.419 | 0.820 |
| 1379630_at   | AI105051 | Transcribed locus | --- | 1.835 | 0.206 | 1.504 | 0.051 | 1.671 | 0.243 | 1.340 | 0.062 |
| 1384360_at   | BI282303 | Transcribed locus | --- | 1.949 | 0.206 | 1.352 | 0.046 | 2.139 | 0.057 | 0.990 | 0.995 |
| 1392999_at   | AA819279 | Transcribed locus | --- | 1.050 | 0.207 | 0.893 | 0.467 | 1.014 | 0.316 | 1.236 | 0.049 |
| 1377682_at   | AW522708 | Transcribed locus | --- | 1.626 | 0.207 | 0.997 | 0.967 | 1.803 | 0.015 | 1.251 | 0.898 |
| 1383691_at   | BF415419 | Transcribed locus | --- | 1.699 | 0.207 | 0.998 | 0.797 | 1.265 | 0.484 | 1.600 | 0.356 |
| 1376982_at   | BI295869 | Transcribed locus | --- | 1.371 | 0.207 | 0.649 | 0.013 | 1.413 | 0.196 | 0.924 | 0.923 |
| 1394742_at   | AW534107 | Transcribed locus | --- | 0.965 | 0.207 | 0.819 | 0.183 | 0.906 | 0.213 | 0.720 | 0.610 |
| 1381984_at   | AI600142 | Transcribed locus | --- | 1.669 | 0.207 | 1.698 | 0.005 | 2.768 | 0.037 | 1.832 | 0.001 |
| 1379252_at   | AW522833 | Transcribed locus | --- | 1.165 | 0.208 | 0.725 | 0.014 | 0.940 | 0.817 | 0.644 | 0.005 |
| 1371872_at   | BE108905 | Transcribed locus | --- | 0.824 | 0.208 | 0.877 | 0.249 | 0.833 | 0.035 | 0.896 | 0.082 |
| 1392119_at   | BF390340 | Transcribed locus | --- | 1.290 | 0.209 | 0.652 | 0.000 | 1.111 | 0.706 | 0.920 | 0.318 |
| 1392775_at   | AI136598 | Transcribed locus | --- | 0.785 | 0.209 | 1.296 | 0.695 | 0.552 | 0.219 | 1.334 | 0.529 |
| 1392432_at   | AA998022 | Transcribed locus | --- | 1.257 | 0.209 | 0.966 | 0.600 | 1.144 | 0.623 | 1.170 | 0.819 |
| 1389259_at   | AA894084 | Transcribed locus | --- | 1.043 | 0.210 | 0.971 | 0.289 | 0.957 | 0.944 | 0.899 | 0.944 |
| 1377287_at   | AA957673 | Transcribed locus | --- | 1.128 | 0.210 | 2.377 | 0.009 | 0.776 | 0.711 | 2.021 | 0.025 |
| 1394509_at   | BE114001 | Transcribed locus | --- | 0.406 | 0.211 | 0.983 | 0.768 | 0.406 | 0.037 | 0.996 | 0.903 |
| 1388474_at   | AI104523 | Transcribed locus | --- | 0.732 | 0.211 | 0.341 | 0.002 | 0.739 | 0.605 | 0.590 | 0.032 |
| 1397184_at   | AI574688 | Transcribed locus | --- | 0.740 | 0.211 | 0.308 | 0.001 | 1.047 | 0.302 | 0.365 | 0.008 |
| 1378105_at   | BF289201 | Transcribed locus | --- | 0.670 | 0.212 | 0.477 | 0.043 | 1.023 | 0.830 | 1.233 | 0.387 |
| 1377012_at   | AI012630 | Transcribed locus | --- | 0.809 | 0.213 | 0.384 | 0.007 | 1.142 | 0.178 | 0.877 | 0.391 |
| 1378182_at   | BI288560 | Transcribed locus | --- | 0.638 | 0.213 | 0.990 | 0.283 | 1.252 | 0.122 | 1.024 | 0.566 |
| 1372379_at   | AI177706 | Transcribed locus | --- | 1.534 | 0.214 | 1.275 | 0.336 | 0.701 | 0.132 | 1.206 | 0.627 |
| 1393251_at   | BM391286 | Transcribed locus | --- | 0.724 | 0.214 | 0.693 | 0.260 | 0.748 | 0.168 | 0.512 | 0.030 |
| 1391431_at   | AI712476 | Transcribed locus | --- | 1.080 | 0.214 | 0.810 | 0.035 | 1.320 | 0.105 | 0.939 | 0.199 |
| 1372779_at   | BG373352 | Transcribed locus | --- | 0.965 | 0.215 | 1.595 | 0.003 | 0.611 | 0.013 | 1.262 | 0.020 |
| 1385594_at   | AW144020 | Transcribed locus | --- | 0.689 | 0.215 | 0.556 | 0.015 | 0.453 | 0.118 | 0.489 | 0.016 |
| 1382557_at   | AA946491 | Transcribed locus | --- | 0.689 | 0.216 | 1.018 | 0.667 | 0.987 | 0.290 | 0.774 | 0.085 |
| 1395071_at   | AI010512 | Transcribed locus | --- | 1.184 | 0.217 | 0.748 | 0.252 | 1.281 | 0.033 | 1.472 | 0.748 |
| 1395742_at   | AW920352 | Transcribed locus | --- | 1.472 | 0.218 | 1.886 | 0.022 | 2.604 | 0.021 | 2.645 | 0.033 |
| 1385955_at   | AI029023 | Transcribed locus | --- | 0.708 | 0.218 | 0.998 | 0.952 | 0.604 | 0.382 | 1.000 | 0.984 |
| 1390864_at   | BE107335 | Transcribed locus | --- | 0.639 | 0.219 | 0.299 | 0.024 | 0.971 | 0.243 | 0.689 | 0.072 |
| 1398964_at   | AI231773 | Transcribed locus | --- | 0.779 | 0.219 | 0.530 | 0.007 | 0.873 | 0.062 | 0.751 | 0.007 |
| 1372594_at   | AI233721 | Transcribed locus | --- | 0.680 | 0.219 | 0.600 | 0.017 | 0.872 | 0.503 | 0.702 | 0.006 |
| 1391752_at   | BF394182 | Transcribed locus | --- | 1.948 | 0.220 | 0.695 | 0.057 | 2.132 | 0.009 | 0.706 | 0.271 |
| 1390574_at   | BE101126 | Transcribed locus | --- | 1.489 | 0.220 | 1.062 | 0.535 | 1.661 | 0.013 | 1.410 | 0.053 |
| 1373612_at   | BM391810 | Transcribed locus | --- | 1.539 | 0.220 | 0.841 | 0.055 | 1.599 | 0.044 | 0.765 | 0.218 |
| 1390583_at   | AI228169 | Transcribed locus | --- | 0.752 | 0.221 | 1.122 | 0.735 | 0.773 | 0.309 | 0.825 | 0.330 |
| 1380785_at   | BF405178 | Transcribed locus | --- | 1.029 | 0.221 | 1.255 | 0.982 | 0.873 | 0.545 | 1.617 | 0.153 |
| 1374941_at   | BF397951 | Transcribed locus | --- | 0.911 | 0.221 | 0.945 | 0.236 | 1.093 | 0.174 | 0.922 | 0.236 |
| 1393350_at   | BI284396 | Transcribed locus | --- | 0.617 | 0.222 | 1.698 | 0.097 | 1.405 | 0.052 | 1.080 | 0.293 |
| 1379412_at   | BF559875 | Transcribed locus | --- | 0.914 | 0.222 | 0.748 | 0.417 | 1.174 | 0.371 | 0.814 | 0.560 |
| 1375011_at   | AA818819 | Transcribed locus | --- | 0.661 | 0.222 | 0.384 | 0.000 | 0.814 | 0.741 | 0.476 | 0.042 |
| 1384217_at   | BI276341 | Transcribed locus | --- | 1.270 | 0.223 | 1.472 | 0.009 | 1.049 | 0.231 | 1.480 | 0.027 |
| 1383776_at   | AW525120 | Transcribed locus | --- | 1.065 | 0.223 | 0.494 | 0.024 | 0.999 | 0.995 | 0.581 | 0.041 |
| 1377092_at   | BF389682 | Transcribed locus | --- | 2.219 | 0.223 | 1.639 | 0.028 | 1.854 | 0.109 | 2.403 | 0.001 |
| 1395474_at   | AW530415 | Transcribed locus | --- | 1.256 | 0.224 | 0.999 | 0.562 | 1.460 | 0.055 | 1.064 | 0.041 |
| 1381724_at   | BF392468 | Transcribed locus | --- | 1.798 | 0.224 | 0.856 | 0.460 | 1.003 | 0.095 | 0.841 | 0.288 |
| 1388874_at   | BE113032 | Transcribed locus | --- | 0.844 | 0.224 | 0.799 | 0.306 | 0.785 | 0.111 | 0.898 | 0.737 |
| 1389491_at   | BE102814 | Transcribed locus | --- | 0.777 | 0.225 | 2.637 | 0.040 | 1.897 | 0.178 | 1.857 | 0.010 |
| 1374721_at   | AI178647 | Transcribed locus | --- | 0.635 | 0.226 | 0.363 | 0.011 | 0.821 | 0.419 | 0.570 | 0.004 |
| 1383404_at   | BI295203 | Transcribed locus | --- | 0.486 | 0.226 | 0.466 | 0.005 | 0.531 | 0.006 | 0.409 | 0.012 |
| 1389379_at   | AI011967 | Transcribed locus | --- | 1.387 | 0.226 | 0.954 | 0.957 | 2.184 | 0.060 | 0.958 | 0.996 |
| 1381336_at   | BF408248 | Transcribed locus | --- | 0.785 | 0.227 | 0.205 | 0.011 | 0.707 | 0.284 | 0.235 | 0.012 |
| 1383982_at   | BE112063 | Transcribed locus | --- | 1.514 | 0.227 | 1.643 | 0.043 | 1.077 | 0.285 | 1.393 | 0.080 |
| 1384668_at   | AI070299 | Transcribed locus | --- | 1.291 | 0.227 | 0.709 | 0.097 | 1.020 | 0.631 | 0.791 | 0.098 |

|            |          |                   |     |       |       |       |       |       |       |       |       |
|------------|----------|-------------------|-----|-------|-------|-------|-------|-------|-------|-------|-------|
| 1390252_at | AI176825 | Transcribed locus | --- | 1.692 | 0.228 | 1.073 | 0.979 | 2.281 | 0.160 | 1.604 | 0.154 |
| 1380522_at | AI060201 | Transcribed locus | --- | 0.953 | 0.228 | 1.121 | 0.074 | 0.939 | 0.160 | 0.989 | 0.969 |
| 1395631_at | BF418465 | Transcribed locus | --- | 0.740 | 0.228 | 0.956 | 0.101 | 0.830 | 0.158 | 0.978 | 0.577 |
| 1391994_at | AI408264 | Transcribed locus | --- | 1.101 | 0.228 | 1.035 | 0.727 | 1.433 | 0.121 | 1.331 | 0.041 |
| 1378010_at | BG662522 | Transcribed locus | --- | 0.652 | 0.228 | 0.527 | 0.000 | 1.029 | 0.542 | 0.764 | 0.129 |
| 1372442_at | BG673216 | Transcribed locus | --- | 1.119 | 0.229 | 0.982 | 0.477 | 1.495 | 0.019 | 1.349 | 0.011 |
| 1383044_at | BM385117 | Transcribed locus | --- | 1.923 | 0.229 | 3.638 | 0.002 | 0.906 | 0.932 | 3.348 | 0.009 |
| 1382223_at | AA874952 | Transcribed locus | --- | 0.940 | 0.229 | 0.820 | 0.025 | 0.761 | 0.259 | 0.894 | 0.448 |
| 1371898_at | BI287946 | Transcribed locus | --- | 1.714 | 0.229 | 2.091 | 0.071 | 1.013 | 0.957 | 1.364 | 0.409 |
| 1389070_at | AI179506 | Transcribed locus | --- | 1.398 | 0.229 | 1.554 | 0.008 | 1.113 | 0.716 | 1.164 | 0.245 |
| 1374192_at | BE105137 | Transcribed locus | --- | 1.423 | 0.230 | 1.157 | 0.216 | 1.054 | 0.230 | 1.269 | 0.742 |
| 1394598_at | AA956038 | Transcribed locus | --- | 0.707 | 0.230 | 0.915 | 0.942 | 1.123 | 0.545 | 1.049 | 0.592 |
| 1373373_at | BI295011 | Transcribed locus | --- | 1.153 | 0.230 | 1.085 | 0.890 | 1.217 | 0.044 | 1.016 | 0.454 |
| 1390990_at | AI409862 | Transcribed locus | --- | 0.558 | 0.230 | 0.345 | 0.004 | 0.552 | 0.021 | 0.442 | 0.001 |
| 1394235_at | AA800639 | Transcribed locus | --- | 0.698 | 0.230 | 0.944 | 0.755 | 1.071 | 0.050 | 0.478 | 0.113 |
| 1375054_at | AI233709 | Transcribed locus | --- | 0.820 | 0.230 | 0.958 | 0.843 | 0.636 | 0.093 | 1.137 | 0.150 |
| 1375194_at | AI231460 | Transcribed locus | --- | 1.171 | 0.231 | 0.273 | 0.005 | 1.433 | 0.720 | 0.405 | 0.007 |
| 1385453_at | AI145167 | Transcribed locus | --- | 4.501 | 0.232 | 0.977 | 0.617 | 3.203 | 0.078 | 1.242 | 0.694 |
| 1379126_at | AI555608 | Transcribed locus | --- | 0.655 | 0.232 | 0.333 | 0.001 | 0.770 | 0.163 | 0.509 | 0.020 |
| 1379817_at | AI227924 | Transcribed locus | --- | 1.286 | 0.232 | 2.259 | 0.047 | 0.755 | 0.148 | 1.000 | 0.137 |
| 1372227_at | AI177863 | Transcribed locus | --- | 0.625 | 0.232 | 0.834 | 0.303 | 0.918 | 0.204 | 0.666 | 0.161 |
| 1385978_at | AI072788 | Transcribed locus | --- | 2.068 | 0.232 | 1.016 | 0.940 | 1.855 | 0.018 | 1.354 | 0.056 |
| 1396274_at | AI111884 | Transcribed locus | --- | 0.698 | 0.232 | 0.490 | 0.068 | 1.214 | 0.516 | 0.757 | 0.280 |
| 1378531_at | AI555775 | Transcribed locus | --- | 1.617 | 0.232 | 0.239 | 0.015 | 1.009 | 0.242 | 0.249 | 0.012 |
| 1398579_at | AA997808 | Transcribed locus | --- | 1.725 | 0.233 | 1.083 | 0.722 | 1.132 | 0.208 | 1.236 | 0.042 |
| 1384505_at | BI294773 | Transcribed locus | --- | 0.859 | 0.233 | 1.065 | 0.569 | 0.808 | 0.075 | 0.760 | 0.128 |
| 1391566_at | AA818977 | Transcribed locus | --- | 0.996 | 0.234 | 0.990 | 0.962 | 0.974 | 0.577 | 0.679 | 0.158 |
| 1381102_at | BF415341 | Transcribed locus | --- | 0.617 | 0.234 | 0.846 | 0.282 | 0.665 | 0.228 | 1.133 | 0.317 |
| 1374939_at | BE112927 | Transcribed locus | --- | 0.942 | 0.234 | 0.606 | 0.003 | 1.249 | 0.811 | 0.674 | 0.002 |
| 1388688_at | BI296599 | Transcribed locus | --- | 1.475 | 0.234 | 1.103 | 0.201 | 1.929 | 0.416 | 1.050 | 0.151 |
| 1374212_at | AI012753 | Transcribed locus | --- | 1.377 | 0.235 | 1.301 | 0.043 | 1.926 | 0.369 | 1.348 | 0.069 |
| 1379859_at | AA964506 | Transcribed locus | --- | 0.916 | 0.235 | 0.915 | 0.267 | 0.753 | 0.086 | 0.728 | 0.040 |
| 1376911_at | BM386385 | Transcribed locus | --- | 0.758 | 0.235 | 0.328 | 0.000 | 0.762 | 0.235 | 0.307 | 0.010 |
| 1398450_at | BI291373 | Transcribed locus | --- | 1.456 | 0.236 | 0.675 | 0.075 | 1.596 | 0.001 | 0.732 | 0.023 |
| 1394594_at | BM383974 | Transcribed locus | --- | 1.175 | 0.236 | 1.430 | 0.027 | 1.176 | 0.347 | 1.323 | 0.359 |
| 1391916_at | BE116043 | Transcribed locus | --- | 1.016 | 0.236 | 0.740 | 0.002 | 0.569 | 0.015 | 0.811 | 0.090 |
| 1384280_at | AA964152 | Transcribed locus | --- | 0.610 | 0.237 | 0.468 | 0.027 | 0.526 | 0.288 | 0.522 | 0.020 |
| 1381470_at | AI454052 | Transcribed locus | --- | 1.260 | 0.237 | 1.580 | 0.016 | 1.721 | 0.010 | 1.526 | 0.022 |
| 1371491_at | BM390614 | Transcribed locus | --- | 1.287 | 0.238 | 1.043 | 0.575 | 1.643 | 0.086 | 1.007 | 0.985 |
| 1392989_at | BI295986 | Transcribed locus | --- | 0.575 | 0.238 | 0.371 | 0.002 | 0.693 | 0.140 | 0.409 | 0.003 |
| 1386008_at | AW914833 | Transcribed locus | --- | 0.857 | 0.239 | 0.529 | 0.016 | 1.033 | 0.304 | 0.547 | 0.050 |
| 1378146_at | BG380860 | Transcribed locus | --- | 0.760 | 0.239 | 1.010 | 0.731 | 0.759 | 0.020 | 1.006 | 0.772 |
| 1383005_at | BM383579 | Transcribed locus | --- | 0.625 | 0.239 | 1.301 | 0.005 | 0.680 | 0.352 | 1.092 | 0.419 |
| 1371588_at | AA686007 | Transcribed locus | --- | 1.232 | 0.239 | 0.684 | 0.009 | 1.131 | 0.091 | 0.748 | 0.023 |
| 1390747_at | BF412714 | Transcribed locus | --- | 1.039 | 0.240 | 0.820 | 0.701 | 1.008 | 0.513 | 1.006 | 0.750 |
| 1380399_at | BF393255 | Transcribed locus | --- | 1.320 | 0.240 | 0.771 | 0.306 | 1.203 | 0.490 | 0.961 | 0.751 |
| 1389111_at | BF396316 | Transcribed locus | --- | 0.691 | 0.240 | 0.664 | 0.012 | 0.537 | 0.032 | 0.604 | 0.031 |
| 1377327_at | AI008151 | Transcribed locus | --- | 1.538 | 0.240 | 1.237 | 0.182 | 0.823 | 0.437 | 1.124 | 0.221 |
| 1392303_at | AA998501 | Transcribed locus | --- | 0.914 | 0.240 | 1.002 | 0.986 | 0.851 | 0.984 | 1.000 | 0.999 |
| 1385506_at | AW530507 | Transcribed locus | --- | 2.103 | 0.242 | 0.530 | 0.530 | 1.613 | 0.162 | 0.901 | 0.722 |
| 1390493_at | AI556256 | Transcribed locus | --- | 0.866 | 0.242 | 2.204 | 0.028 | 1.083 | 0.058 | 3.241 | 0.014 |
| 1380760_at | BF420433 | Transcribed locus | --- | 0.969 | 0.242 | 1.001 | 0.153 | 0.524 | 0.076 | 1.359 | 0.299 |
| 1380116_at | AI146098 | Transcribed locus | --- | 1.207 | 0.242 | 1.207 | 0.021 | 1.300 | 0.057 | 0.942 | 0.595 |
| 1397430_at | BF403977 | Transcribed locus | --- | 0.638 | 0.243 | 0.824 | 0.826 | 1.278 | 0.986 | 0.972 | 0.358 |
| 1376568_at | AI144997 | Transcribed locus | --- | 1.386 | 0.243 | 0.705 | 0.070 | 1.683 | 0.096 | 0.852 | 0.421 |
| 1378592_at | BF396210 | Transcribed locus | --- | 1.388 | 0.243 | 3.101 | 0.001 | 1.242 | 0.314 | 3.764 | 0.010 |
| 1382148_at | AA923980 | Transcribed locus | --- | 1.139 | 0.243 | 2.159 | 0.072 | 1.077 | 0.084 | 1.987 | 0.019 |
| 1377609_at | BE112251 | Transcribed locus | --- | 1.169 | 0.243 | 1.001 | 0.701 | 1.025 | 0.810 | 1.023 | 0.668 |
| 1393382_at | BE096740 | Transcribed locus | --- | 0.669 | 0.243 | 1.013 | 0.626 | 0.750 | 0.637 | 1.404 | 0.156 |
| 1375561_at | BG372234 | Transcribed locus | --- | 1.432 | 0.245 | 1.032 | 0.378 | 1.500 | 0.054 | 0.993 | 0.340 |
| 1375970_at | AI010423 | Transcribed locus | --- | 0.990 | 0.245 | 0.628 | 0.003 | 1.043 | 0.776 | 0.780 | 0.002 |

|            |          |                   |     |       |       |       |       |       |       |       |       |
|------------|----------|-------------------|-----|-------|-------|-------|-------|-------|-------|-------|-------|
| 1391981_at | AI639181 | Transcribed locus | --- | 1.209 | 0.246 | 1.004 | 0.974 | 0.881 | 0.532 | 1.009 | 0.972 |
| 1378014_at | BF405144 | Transcribed locus | --- | 0.846 | 0.246 | 0.618 | 0.010 | 1.365 | 0.160 | 0.974 | 0.838 |
| 1397986_at | BF389825 | Transcribed locus | --- | 1.572 | 0.246 | 0.581 | 0.990 | 1.532 | 0.049 | 0.666 | 0.493 |
| 1373482_at | BI303106 | Transcribed locus | --- | 1.234 | 0.247 | 1.265 | 0.160 | 1.441 | 0.119 | 1.367 | 0.025 |
| 1390735_at | BG375163 | Transcribed locus | --- | 0.897 | 0.247 | 1.114 | 0.795 | 0.608 | 0.218 | 1.426 | 0.057 |
| 1381818_at | BF409711 | Transcribed locus | --- | 0.769 | 0.248 | 0.923 | 0.708 | 1.022 | 0.762 | 1.078 | 0.673 |
| 1385117_at | BE101831 | Transcribed locus | --- | 1.285 | 0.249 | 1.008 | 0.913 | 1.046 | 0.837 | 0.927 | 0.883 |
| 1385731_at | BE113552 | Transcribed locus | --- | 0.588 | 0.249 | 0.298 | 0.025 | 0.462 | 0.018 | 0.386 | 0.030 |
| 1389616_at | BF403163 | Transcribed locus | --- | 0.851 | 0.250 | 0.960 | 0.147 | 0.826 | 0.508 | 0.625 | 0.036 |
| 1393178_at | BF551322 | Transcribed locus | --- | 0.496 | 0.250 | 0.875 | 0.965 | 0.431 | 0.243 | 0.700 | 0.374 |
| 1377850_at | AI178231 | Transcribed locus | --- | 1.564 | 0.250 | 0.678 | 0.945 | 0.935 | 0.834 | 0.819 | 0.173 |
| 1397858_at | AI548704 | Transcribed locus | --- | 3.639 | 0.250 | 1.179 | 0.285 | 2.967 | 0.082 | 1.432 | 0.233 |
| 1386027_at | AI409701 | Transcribed locus | --- | 0.635 | 0.251 | 0.130 | 0.005 | 0.464 | 0.185 | 0.254 | 0.075 |
| 1396957_at | BF404490 | Transcribed locus | --- | 0.555 | 0.251 | 0.461 | 0.059 | 0.630 | 0.283 | 0.517 | 0.129 |
| 1395759_at | AI556251 | Transcribed locus | --- | 0.989 | 0.251 | 2.963 | 0.011 | 1.269 | 0.435 | 1.863 | 0.041 |
| 1380789_at | BF416254 | Transcribed locus | --- | 1.896 | 0.251 | 1.258 | 0.301 | 1.043 | 0.297 | 1.401 | 0.126 |
| 1382002_at | AI230621 | Transcribed locus | --- | 1.231 | 0.252 | 0.485 | 0.024 | 1.102 | 0.242 | 0.370 | 0.118 |
| 1378537_at | BI289126 | Transcribed locus | --- | 1.970 | 0.253 | 0.989 | 0.734 | 1.001 | 0.998 | 1.034 | 0.896 |
| 1367539_at | AI170357 | Transcribed locus | --- | 1.388 | 0.253 | 0.716 | 0.079 | 1.080 | 0.679 | 0.853 | 0.087 |
| 1377421_at | BF562337 | Transcribed locus | --- | 0.838 | 0.253 | 0.873 | 0.021 | 1.003 | 0.182 | 0.990 | 0.300 |
| 1377913_at | AI598485 | Transcribed locus | --- | 1.483 | 0.253 | 1.559 | 0.119 | 1.127 | 0.676 | 1.328 | 0.838 |
| 1380978_at | AI044494 | Transcribed locus | --- | 0.694 | 0.254 | 0.904 | 0.027 | 0.967 | 0.803 | 0.763 | 0.025 |
| 1383866_at | BI293248 | Transcribed locus | --- | 1.010 | 0.254 | 0.418 | 0.001 | 0.565 | 0.817 | 0.417 | 0.113 |
| 1373626_at | AI102507 | Transcribed locus | --- | 1.636 | 0.255 | 1.077 | 0.076 | 1.831 | 0.183 | 1.248 | 0.013 |
| 1384463_at | AW523485 | Transcribed locus | --- | 0.647 | 0.255 | 0.603 | 0.089 | 1.010 | 0.973 | 0.780 | 0.607 |
| 1390199_at | BM389647 | Transcribed locus | --- | 0.935 | 0.256 | 1.641 | 0.001 | 0.760 | 0.010 | 1.412 | 0.045 |
| 1397750_at | AI145087 | Transcribed locus | --- | 1.484 | 0.256 | 0.668 | 0.171 | 1.038 | 0.876 | 0.868 | 0.253 |
| 1374116_at | AA964836 | Transcribed locus | --- | 0.895 | 0.256 | 0.885 | 0.314 | 0.904 | 0.083 | 0.855 | 0.064 |
| 1391183_at | BI290796 | Transcribed locus | --- | 0.491 | 0.256 | 1.220 | 0.223 | 0.889 | 0.162 | 0.828 | 0.635 |
| 1376712_at | AI144967 | Transcribed locus | --- | 0.703 | 0.256 | 0.546 | 0.009 | 0.836 | 0.329 | 0.747 | 0.085 |
| 1372509_at | AI172024 | Transcribed locus | --- | 1.013 | 0.257 | 0.936 | 0.449 | 0.999 | 0.431 | 0.775 | 0.174 |
| 1390734_at | BI291369 | Transcribed locus | --- | 1.681 | 0.257 | 0.583 | 0.044 | 0.919 | 0.475 | 0.612 | 0.060 |
| 1383390_at | AI111644 | Transcribed locus | --- | 0.649 | 0.257 | 0.493 | 0.023 | 0.566 | 0.145 | 0.555 | 0.048 |
| 1382177_at | BF415064 | Transcribed locus | --- | 1.314 | 0.258 | 0.970 | 0.104 | 4.194 | 0.004 | 2.560 | 0.007 |
| 1382372_at | AA858521 | Transcribed locus | --- | 2.033 | 0.258 | 1.752 | 0.002 | 1.734 | 0.475 | 1.662 | 0.014 |
| 1379725_at | AW920459 | Transcribed locus | --- | 1.239 | 0.259 | 0.836 | 0.618 | 0.986 | 0.456 | 0.947 | 0.410 |
| 1372774_at | AI170570 | Transcribed locus | --- | 0.682 | 0.259 | 1.299 | 0.022 | 0.591 | 0.011 | 1.098 | 0.435 |
| 1394573_at | BF288475 | Transcribed locus | --- | 0.950 | 0.260 | 0.703 | 0.090 | 0.903 | 0.746 | 0.608 | 0.001 |
| 1384141_at | BI289930 | Transcribed locus | --- | 1.344 | 0.260 | 2.147 | 0.020 | 0.849 | 0.417 | 1.196 | 0.322 |
| 1382079_at | AI511007 | Transcribed locus | --- | 0.653 | 0.261 | 1.103 | 0.420 | 1.347 | 0.570 | 0.821 | 0.109 |
| 1383687_at | AW435306 | Transcribed locus | --- | 0.726 | 0.261 | 0.722 | 0.131 | 0.865 | 0.343 | 0.780 | 0.083 |
| 1382249_at | AI171858 | Transcribed locus | --- | 1.264 | 0.262 | 1.022 | 0.781 | 1.423 | 0.186 | 1.062 | 0.231 |
| 1390799_at | AI177748 | Transcribed locus | --- | 0.579 | 0.262 | 1.172 | 0.587 | 0.431 | 0.002 | 0.965 | 0.944 |
| 1395964_at | BI301241 | Transcribed locus | --- | 1.051 | 0.263 | 0.983 | 0.097 | 1.074 | 0.175 | 0.718 | 0.258 |
| 1391012_at | BF283210 | Transcribed locus | --- | 0.681 | 0.263 | 0.992 | 0.557 | 0.770 | 0.199 | 1.237 | 0.740 |
| 1393580_at | AW531476 | Transcribed locus | --- | 1.125 | 0.263 | 1.611 | 0.645 | 1.043 | 0.668 | 1.290 | 0.977 |
| 1377700_at | BE111648 | Transcribed locus | --- | 0.971 | 0.263 | 0.588 | 0.001 | 1.187 | 0.158 | 0.784 | 0.049 |
| 1375067_at | AI555354 | Transcribed locus | --- | 0.943 | 0.264 | 1.405 | 0.050 | 0.834 | 0.040 | 1.113 | 0.221 |
| 1383498_at | BG373354 | Transcribed locus | --- | 1.677 | 0.264 | 1.890 | 0.002 | 1.279 | 0.942 | 1.201 | 0.013 |
| 1375035_at | AI169627 | Transcribed locus | --- | 1.215 | 0.264 | 0.883 | 0.199 | 0.979 | 0.908 | 0.868 | 0.289 |
| 1392951_at | AW521231 | Transcribed locus | --- | 0.764 | 0.264 | 0.545 | 0.003 | 0.702 | 0.273 | 0.620 | 0.007 |
| 1376168_at | BE100946 | Transcribed locus | --- | 0.614 | 0.266 | 1.000 | 0.996 | 0.691 | 0.062 | 1.089 | 0.619 |
| 1382132_at | AW524858 | Transcribed locus | --- | 0.801 | 0.266 | 0.412 | 0.011 | 0.997 | 0.112 | 0.500 | 0.057 |
| 1389590_at | AA925513 | Transcribed locus | --- | 0.741 | 0.266 | 0.996 | 0.186 | 0.705 | 0.305 | 0.880 | 0.208 |
| 1383778_at | AW917920 | Transcribed locus | --- | 1.268 | 0.267 | 1.193 | 0.642 | 1.622 | 0.013 | 1.194 | 0.672 |
| 1389700_at | H31078   | Transcribed locus | --- | 1.171 | 0.267 | 1.462 | 0.058 | 1.256 | 0.274 | 1.526 | 0.193 |
| 1383493_at | BE102202 | Transcribed locus | --- | 1.355 | 0.268 | 0.606 | 0.024 | 1.088 | 0.484 | 0.620 | 0.122 |
| 1377852_at | BF410258 | Transcribed locus | --- | 1.999 | 0.269 | 1.002 | 0.989 | 1.804 | 0.096 | 1.003 | 0.997 |
| 1388778_at | BF284876 | Transcribed locus | --- | 0.720 | 0.270 | 0.324 | 0.003 | 1.406 | 0.614 | 0.702 | 0.037 |
| 1378314_at | AA956277 | Transcribed locus | --- | 0.921 | 0.270 | 1.100 | 0.110 | 0.921 | 0.275 | 0.997 | 0.987 |
| 1391441_at | AA899943 | Transcribed locus | --- | 1.011 | 0.271 | 0.843 | 0.756 | 0.841 | 0.322 | 0.957 | 0.118 |

|              |          |                   |     |       |       |        |       |       |       |       |       |
|--------------|----------|-------------------|-----|-------|-------|--------|-------|-------|-------|-------|-------|
| 1394420_at   | BF287027 | Transcribed locus | --- | 1.315 | 0.271 | 1.341  | 0.435 | 0.995 | 0.937 | 1.303 | 0.478 |
| 1383515_at   | AW143503 | Transcribed locus | --- | 0.816 | 0.272 | 0.328  | 0.015 | 0.710 | 0.138 | 0.480 | 0.011 |
| 1391549_at   | BF288456 | Transcribed locus | --- | 0.764 | 0.272 | 0.288  | 0.003 | 0.842 | 0.233 | 0.282 | 0.036 |
| 1389085_at   | BI296359 | Transcribed locus | --- | 0.835 | 0.272 | 1.034  | 0.642 | 0.862 | 0.930 | 1.021 | 0.985 |
| 1377911_at   | AI029434 | Transcribed locus | --- | 0.657 | 0.273 | 0.652  | 0.026 | 0.862 | 0.354 | 0.819 | 0.003 |
| 1391476_at   | BE113113 | Transcribed locus | --- | 1.332 | 0.273 | 0.560  | 0.010 | 1.584 | 0.144 | 0.731 | 0.010 |
| 1371522_at   | BI295010 | Transcribed locus | --- | 1.228 | 0.274 | 1.946  | 0.005 | 0.898 | 0.581 | 2.038 | 0.000 |
| 1372771_at   | BI279659 | Transcribed locus | --- | 0.590 | 0.274 | 0.419  | 0.013 | 0.399 | 0.025 | 0.517 | 0.019 |
| 1380452_at   | AA964564 | Transcribed locus | --- | 1.605 | 0.274 | 1.488  | 0.841 | 1.975 | 0.309 | 1.345 | 0.850 |
| 1394849_at   | BF402012 | Transcribed locus | --- | 1.366 | 0.275 | 0.983  | 0.446 | 2.193 | 0.001 | 0.994 | 0.985 |
| 1380402_at   | AA818127 | Transcribed locus | --- | 0.895 | 0.276 | 1.970  | 0.009 | 0.996 | 0.281 | 1.443 | 0.012 |
| 1378441_at   | AI176859 | Transcribed locus | --- | 0.540 | 0.277 | 0.337  | 0.005 | 0.562 | 0.289 | 0.289 | 0.014 |
| 1389642_at   | H35643   | Transcribed locus | --- | 1.373 | 0.278 | 0.887  | 0.070 | 2.122 | 0.010 | 1.382 | 0.169 |
| 1380437_at   | BE104421 | Transcribed locus | --- | 1.005 | 0.278 | 0.428  | 0.002 | 1.067 | 0.464 | 0.534 | 0.009 |
| 1395903_at   | BF565954 | Transcribed locus | --- | 1.656 | 0.279 | 1.575  | 0.710 | 1.355 | 0.251 | 1.204 | 0.581 |
| 1376837_at   | BE109381 | Transcribed locus | --- | 0.965 | 0.279 | 1.270  | 0.097 | 0.817 | 0.896 | 1.420 | 0.070 |
| 1395563_at   | AA875586 | Transcribed locus | --- | 0.562 | 0.280 | 0.345  | 0.093 | 0.537 | 0.061 | 0.293 | 0.040 |
| 1380976_at   | BF396723 | Transcribed locus | --- | 1.247 | 0.280 | 0.319  | 0.003 | 1.316 | 0.101 | 0.415 | 0.002 |
| 1390639_at   | BM387719 | Transcribed locus | --- | 1.146 | 0.281 | 1.020  | 0.959 | 0.950 | 0.779 | 0.935 | 0.136 |
| 1378736_at   | BF391862 | Transcribed locus | --- | 0.915 | 0.281 | 0.495  | 0.029 | 0.986 | 0.836 | 0.528 | 0.093 |
| 1389497_at   | BF414808 | Transcribed locus | --- | 0.895 | 0.282 | 3.648  | 0.015 | 0.781 | 0.078 | 2.090 | 0.109 |
| 1372146_at   | AA851264 | Transcribed locus | --- | 0.534 | 0.283 | 0.802  | 0.012 | 0.609 | 0.040 | 0.776 | 0.021 |
| 1386701_at   | BF565038 | Transcribed locus | --- | 1.235 | 0.283 | 0.988  | 0.974 | 1.074 | 0.175 | 0.935 | 0.354 |
| 1371755_at   | AA799607 | Transcribed locus | --- | 0.614 | 0.284 | 0.431  | 0.001 | 0.561 | 0.016 | 0.589 | 0.004 |
| 1382193_at   | BI294188 | Transcribed locus | --- | 0.460 | 0.285 | 0.508  | 0.001 | 0.872 | 0.331 | 0.555 | 0.003 |
| 1373569_at   | AI013005 | Transcribed locus | --- | 0.839 | 0.286 | 1.564  | 0.233 | 0.738 | 0.180 | 1.165 | 0.920 |
| 1373858_at   | BE109064 | Transcribed locus | --- | 0.940 | 0.288 | 0.583  | 0.009 | 0.876 | 0.051 | 0.596 | 0.019 |
| 1389149_at   | BM389321 | Transcribed locus | --- | 1.208 | 0.288 | 1.251  | 0.264 | 1.563 | 0.143 | 1.130 | 0.010 |
| 1397573_at   | BM391779 | Transcribed locus | --- | 0.894 | 0.288 | 1.440  | 0.049 | 0.778 | 0.758 | 1.467 | 0.241 |
| 1372785_at   | BG671790 | Transcribed locus | --- | 1.362 | 0.288 | 1.127  | 0.219 | 1.206 | 0.203 | 1.244 | 0.113 |
| 1391580_at   | AI234123 | Transcribed locus | --- | 0.672 | 0.289 | 0.574  | 0.053 | 0.942 | 0.649 | 1.038 | 0.120 |
| 1383366_at   | BE107954 | Transcribed locus | --- | 1.523 | 0.289 | 0.761  | 0.053 | 0.885 | 0.587 | 0.612 | 0.100 |
| 1373076_at   | AI411577 | Transcribed locus | --- | 0.926 | 0.289 | 0.321  | 0.017 | 0.835 | 0.618 | 0.510 | 0.046 |
| 1390724_at   | AW253006 | Transcribed locus | --- | 1.315 | 0.290 | 1.177  | 0.161 | 1.407 | 0.139 | 2.010 | 0.075 |
| 1389456_at   | BI296591 | Transcribed locus | --- | 0.716 | 0.291 | 0.940  | 0.616 | 0.756 | 0.116 | 0.868 | 0.700 |
| 1379662_a_at | AI011832 | Transcribed locus | --- | 1.712 | 0.291 | 1.412  | 0.012 | 1.644 | 0.430 | 1.427 | 0.267 |
| 1392666_at   | BF554555 | Transcribed locus | --- | 0.718 | 0.291 | 0.276  | 0.044 | 0.898 | 0.682 | 0.327 | 0.250 |
| 1385739_at   | BE120816 | Transcribed locus | --- | 1.201 | 0.291 | 1.150  | 0.077 | 1.410 | 0.030 | 1.230 | 0.020 |
| 1396156_at   | BE120371 | Transcribed locus | --- | 0.986 | 0.292 | 0.514  | 0.167 | 0.747 | 0.203 | 0.927 | 0.792 |
| 1374164_at   | BF410020 | Transcribed locus | --- | 0.909 | 0.292 | 0.609  | 0.022 | 2.349 | 0.002 | 1.872 | 0.018 |
| 1378175_at   | AW921557 | Transcribed locus | --- | 0.912 | 0.292 | 0.378  | 0.130 | 1.356 | 0.262 | 0.573 | 0.022 |
| 1388862_at   | AI412143 | Transcribed locus | --- | 0.694 | 0.294 | 0.650  | 0.012 | 0.484 | 0.027 | 0.657 | 0.018 |
| 1397485_at   | BI298636 | Transcribed locus | --- | 0.691 | 0.294 | 0.462  | 0.010 | 0.549 | 0.079 | 0.646 | 0.037 |
| 1385100_at   | AI073049 | Transcribed locus | --- | 1.044 | 0.295 | 0.489  | 0.409 | 0.943 | 0.037 | 0.883 | 0.376 |
| 1377749_at   | BE112621 | Transcribed locus | --- | 0.792 | 0.295 | 0.839  | 0.359 | 0.397 | 0.146 | 0.795 | 0.314 |
| 1393331_at   | AI575856 | Transcribed locus | --- | 1.466 | 0.295 | 11.502 | 0.001 | 2.905 | 0.118 | 8.103 | 0.001 |
| 1383526_at   | AA957027 | Transcribed locus | --- | 1.145 | 0.295 | 1.006  | 0.972 | 1.310 | 0.286 | 1.152 | 0.988 |
| 1394948_at   | BI303527 | Transcribed locus | --- | 1.147 | 0.295 | 2.795  | 0.129 | 0.788 | 0.278 | 2.175 | 0.122 |
| 1382668_at   | AI232529 | Transcribed locus | --- | 0.863 | 0.296 | 0.929  | 0.259 | 1.260 | 0.237 | 0.813 | 0.571 |
| 1395551_at   | BG671371 | Transcribed locus | --- | 0.602 | 0.296 | 1.037  | 0.912 | 0.496 | 0.323 | 1.101 | 0.389 |
| 1386745_at   | BF523839 | Transcribed locus | --- | 1.392 | 0.296 | 0.542  | 0.003 | 1.426 | 0.303 | 0.701 | 0.033 |
| 1391167_at   | AW532567 | Transcribed locus | --- | 1.388 | 0.297 | 0.815  | 0.140 | 1.391 | 0.465 | 1.025 | 0.796 |
| 1398518_at   | AW534099 | Transcribed locus | --- | 1.349 | 0.297 | 0.997  | 0.992 | 0.990 | 0.873 | 1.003 | 0.801 |
| 1378570_at   | AA849985 | Transcribed locus | --- | 0.694 | 0.297 | 0.318  | 0.003 | 1.247 | 0.643 | 0.548 | 0.001 |
| 1395655_at   | BM383435 | Transcribed locus | --- | 1.202 | 0.297 | 0.983  | 0.295 | 0.800 | 0.106 | 1.043 | 0.168 |
| 1390401_at   | BF285365 | Transcribed locus | --- | 1.292 | 0.298 | 0.752  | 0.197 | 1.401 | 0.092 | 0.851 | 0.182 |
| 1372216_at   | AI010259 | Transcribed locus | --- | 1.395 | 0.298 | 1.069  | 0.732 | 0.999 | 0.639 | 0.938 | 0.951 |
| 1380692_at   | BM387127 | Transcribed locus | --- | 0.578 | 0.298 | 0.636  | 0.063 | 1.165 | 0.695 | 0.850 | 0.492 |
| 1381817_at   | AI044318 | Transcribed locus | --- | 0.624 | 0.300 | 0.290  | 0.001 | 0.583 | 0.066 | 0.513 | 0.003 |
| 1379562_at   | AA858498 | Transcribed locus | --- | 0.841 | 0.300 | 0.413  | 0.006 | 0.632 | 0.463 | 0.292 | 0.001 |
| 1382469_at   | AA900787 | Transcribed locus | --- | 0.861 | 0.301 | 0.451  | 0.001 | 0.797 | 0.091 | 0.519 | 0.001 |

|            |          |                   |     |       |       |       |       |       |       |       |       |
|------------|----------|-------------------|-----|-------|-------|-------|-------|-------|-------|-------|-------|
| 1383727_at | BF564921 | Transcribed locus | --- | 1.090 | 0.302 | 3.916 | 0.006 | 1.039 | 0.778 | 1.576 | 0.057 |
| 1398451_at | BI296494 | Transcribed locus | --- | 0.662 | 0.303 | 2.579 | 0.316 | 0.400 | 0.077 | 1.367 | 0.435 |
| 1390341_at | BF396709 | Transcribed locus | --- | 1.030 | 0.303 | 0.969 | 0.397 | 1.343 | 0.255 | 1.005 | 0.928 |
| 1374530_at | AI010048 | Transcribed locus | --- | 0.972 | 0.304 | 5.959 | 0.001 | 1.299 | 0.044 | 4.985 | 0.004 |
| 1388764_at | BM387072 | Transcribed locus | --- | 1.289 | 0.304 | 1.007 | 0.254 | 1.204 | 0.065 | 0.947 | 0.284 |
| 1385956_at | BF289086 | Transcribed locus | --- | 0.653 | 0.305 | 0.591 | 0.032 | 0.633 | 0.134 | 0.539 | 0.036 |
| 1379666_at | BF417824 | Transcribed locus | --- | 1.305 | 0.305 | 1.360 | 0.079 | 1.317 | 0.470 | 1.494 | 0.637 |
| 1383714_at | H32348   | Transcribed locus | --- | 1.227 | 0.306 | 1.733 | 0.001 | 1.253 | 0.255 | 1.842 | 0.037 |
| 1384430_at | BF390040 | Transcribed locus | --- | 1.351 | 0.306 | 0.826 | 0.161 | 1.326 | 0.158 | 0.751 | 0.999 |
| 1386176_at | AA892868 | Transcribed locus | --- | 0.898 | 0.306 | 0.997 | 0.225 | 2.787 | 0.100 | 1.144 | 0.075 |
| 1392645_at | AA998765 | Transcribed locus | --- | 0.735 | 0.307 | 0.491 | 0.013 | 0.403 | 0.005 | 0.437 | 0.063 |
| 1381607_at | AI145754 | Transcribed locus | --- | 1.059 | 0.307 | 0.556 | 0.013 | 0.709 | 0.370 | 0.548 | 0.178 |
| 1388899_at | BE098818 | Transcribed locus | --- | 1.260 | 0.308 | 0.677 | 0.011 | 1.122 | 0.977 | 0.755 | 0.045 |
| 1392946_at | AI029194 | Transcribed locus | --- | 0.799 | 0.308 | 0.236 | 0.001 | 0.739 | 0.276 | 0.331 | 0.007 |
| 1372275_at | BI296757 | Transcribed locus | --- | 0.541 | 0.309 | 0.630 | 0.276 | 0.619 | 0.053 | 0.744 | 0.098 |
| 1372530_at | AA944190 | Transcribed locus | --- | 0.841 | 0.309 | 0.824 | 0.123 | 0.945 | 0.840 | 0.973 | 0.300 |
| 1393341_at | AA955466 | Transcribed locus | --- | 0.819 | 0.309 | 0.907 | 0.036 | 0.684 | 0.063 | 0.902 | 0.110 |
| 1392742_at | AI230806 | Transcribed locus | --- | 0.656 | 0.310 | 1.079 | 0.660 | 0.366 | 0.137 | 0.998 | 0.245 |
| 1379879_at | AI411294 | Transcribed locus | --- | 1.302 | 0.310 | 0.655 | 0.286 | 0.836 | 0.650 | 0.617 | 0.257 |
| 1382605_at | AI234026 | Transcribed locus | --- | 0.697 | 0.311 | 1.064 | 0.882 | 0.736 | 0.391 | 0.934 | 0.981 |
| 1385899_at | BE113381 | Transcribed locus | --- | 0.764 | 0.311 | 1.283 | 0.972 | 1.090 | 0.705 | 1.000 | 1.000 |
| 1378602_at | BE098753 | Transcribed locus | --- | 0.763 | 0.312 | 0.900 | 0.241 | 0.752 | 0.010 | 0.637 | 0.002 |
| 1376157_at | AI236782 | Transcribed locus | --- | 0.764 | 0.312 | 0.357 | 0.033 | 0.856 | 0.688 | 0.676 | 0.008 |
| 1378547_at | AI176027 | Transcribed locus | --- | 0.724 | 0.312 | 1.088 | 0.760 | 0.545 | 0.109 | 0.828 | 0.615 |
| 1383523_at | BE110369 | Transcribed locus | --- | 1.677 | 0.312 | 1.710 | 0.001 | 2.143 | 0.002 | 2.083 | 0.011 |
| 1383632_at | BI295105 | Transcribed locus | --- | 0.757 | 0.312 | 1.183 | 0.072 | 0.575 | 0.029 | 1.282 | 0.003 |
| 1394776_at | AA899386 | Transcribed locus | --- | 0.776 | 0.313 | 1.001 | 0.305 | 0.780 | 0.316 | 1.150 | 0.065 |
| 1374149_at | AW144301 | Transcribed locus | --- | 0.664 | 0.313 | 0.434 | 0.013 | 0.980 | 0.935 | 0.690 | 0.007 |
| 1379625_at | BG664461 | Transcribed locus | --- | 1.244 | 0.313 | 0.675 | 0.006 | 1.978 | 0.210 | 0.941 | 0.367 |
| 1371826_at | BM390536 | Transcribed locus | --- | 0.728 | 0.314 | 1.056 | 0.233 | 0.759 | 0.046 | 1.006 | 0.361 |
| 1374453_at | AW917568 | Transcribed locus | --- | 1.090 | 0.315 | 1.250 | 0.371 | 0.960 | 0.227 | 1.056 | 0.598 |
| 1397290_at | AI408310 | Transcribed locus | --- | 0.843 | 0.315 | 0.429 | 0.023 | 1.009 | 0.965 | 0.488 | 0.015 |
| 1398217_at | BE108367 | Transcribed locus | --- | 1.156 | 0.315 | 0.645 | 0.753 | 1.221 | 0.797 | 1.214 | 0.140 |
| 1375946_at | BF415909 | Transcribed locus | --- | 0.931 | 0.315 | 0.578 | 0.004 | 1.001 | 0.986 | 0.624 | 0.002 |
| 1391486_at | BM388409 | Transcribed locus | --- | 0.819 | 0.315 | 0.738 | 0.065 | 0.877 | 0.792 | 1.041 | 0.337 |
| 1378516_at | BF409076 | Transcribed locus | --- | 0.736 | 0.316 | 0.432 | 0.022 | 1.489 | 0.819 | 0.405 | 0.063 |
| 1397889_at | BF402043 | Transcribed locus | --- | 0.716 | 0.316 | 0.965 | 0.525 | 1.147 | 0.104 | 1.042 | 0.358 |
| 1383113_at | AW523077 | Transcribed locus | --- | 1.154 | 0.317 | 1.164 | 0.416 | 1.042 | 0.264 | 0.951 | 0.729 |
| 1390121_at | BM391112 | Transcribed locus | --- | 0.970 | 0.317 | 0.998 | 0.982 | 0.795 | 0.490 | 0.915 | 0.055 |
| 1390368_at | AI716535 | Transcribed locus | --- | 0.804 | 0.318 | 0.550 | 0.036 | 0.929 | 0.064 | 0.575 | 0.054 |
| 1382054_at | BF285731 | Transcribed locus | --- | 0.606 | 0.318 | 1.100 | 0.491 | 0.980 | 0.475 | 1.626 | 0.774 |
| 1383473_at | BF551504 | Transcribed locus | --- | 1.063 | 0.318 | 1.041 | 0.771 | 1.179 | 0.745 | 1.001 | 0.521 |
| 1393284_at | BF567391 | Transcribed locus | --- | 1.263 | 0.319 | 0.938 | 0.927 | 0.979 | 0.885 | 1.003 | 0.984 |
| 1377430_at | BF413556 | Transcribed locus | --- | 1.249 | 0.319 | 0.937 | 0.037 | 1.484 | 0.090 | 1.130 | 0.822 |
| 1372539_at | AA801220 | Transcribed locus | --- | 1.174 | 0.320 | 0.430 | 0.022 | 1.570 | 0.164 | 0.313 | 0.022 |
| 1389376_at | BE113330 | Transcribed locus | --- | 0.954 | 0.320 | 0.287 | 0.000 | 0.715 | 0.089 | 0.381 | 0.012 |
| 1388478_at | BE108225 | Transcribed locus | --- | 1.037 | 0.320 | 1.663 | 0.001 | 1.436 | 0.960 | 1.852 | 0.002 |
| 1373707_at | BM382865 | Transcribed locus | --- | 1.270 | 0.321 | 1.593 | 0.017 | 1.668 | 0.452 | 1.309 | 0.002 |
| 1391594_at | BI295733 | Transcribed locus | --- | 1.583 | 0.321 | 1.061 | 0.676 | 1.412 | 0.621 | 0.886 | 0.912 |
| 1398427_at | AW526160 | Transcribed locus | --- | 2.085 | 0.321 | 3.049 | 0.013 | 0.814 | 0.085 | 2.174 | 0.056 |
| 1372467_at | AA943794 | Transcribed locus | --- | 0.739 | 0.322 | 0.522 | 0.045 | 0.698 | 0.197 | 0.518 | 0.133 |
| 1373892_at | AA945986 | Transcribed locus | --- | 0.776 | 0.322 | 0.622 | 0.016 | 0.763 | 0.006 | 0.779 | 0.004 |
| 1393571_at | AA963158 | Transcribed locus | --- | 1.440 | 0.322 | 0.729 | 0.113 | 0.639 | 0.003 | 0.819 | 0.231 |
| 1389405_at | BG378880 | Transcribed locus | --- | 1.173 | 0.323 | 0.502 | 0.027 | 1.091 | 0.260 | 0.692 | 0.021 |
| 1388872_at | BI290053 | Transcribed locus | --- | 0.459 | 0.324 | 0.404 | 0.006 | 0.521 | 0.185 | 0.381 | 0.006 |
| 1376575_at | BI302686 | Transcribed locus | --- | 1.317 | 0.324 | 1.237 | 0.005 | 1.853 | 0.030 | 1.505 | 0.001 |
| 1377093_at | BE106555 | Transcribed locus | --- | 1.243 | 0.325 | 1.199 | 0.392 | 1.151 | 0.476 | 0.852 | 0.211 |
| 1373229_at | AI407946 | Transcribed locus | --- | 1.572 | 0.325 | 0.821 | 0.088 | 1.671 | 0.717 | 0.732 | 0.070 |
| 1383170_at | AW143788 | Transcribed locus | --- | 0.751 | 0.326 | 1.081 | 0.715 | 1.177 | 0.777 | 1.503 | 0.574 |
| 1377517_at | AA945491 | Transcribed locus | --- | 1.124 | 0.326 | 1.029 | 0.186 | 0.991 | 0.959 | 1.034 | 0.668 |
| 1397764_at | BG379719 | Transcribed locus | --- | 1.686 | 0.327 | 1.721 | 0.045 | 1.410 | 0.497 | 1.499 | 0.061 |

|              |          |                   |     |       |       |       |       |       |       |       |       |
|--------------|----------|-------------------|-----|-------|-------|-------|-------|-------|-------|-------|-------|
| 1374174_at   | AI555195 | Transcribed locus | --- | 1.751 | 0.328 | 1.101 | 0.580 | 2.119 | 0.550 | 0.868 | 0.319 |
| 1381076_at   | BF391525 | Transcribed locus | --- | 0.839 | 0.329 | 1.395 | 0.068 | 0.614 | 0.030 | 1.048 | 0.225 |
| 1386089_at   | BF548514 | Transcribed locus | --- | 1.709 | 0.329 | 1.020 | 0.557 | 0.795 | 0.296 | 1.024 | 0.550 |
| 1394546_at   | AI556229 | Transcribed locus | --- | 0.815 | 0.330 | 0.099 | 0.000 | 0.592 | 0.051 | 0.206 | 0.008 |
| 1393024_at   | BI300589 | Transcribed locus | --- | 0.708 | 0.331 | 0.395 | 0.001 | 0.582 | 0.094 | 0.618 | 0.010 |
| 1397480_at   | BF548515 | Transcribed locus | --- | 1.062 | 0.331 | 0.992 | 0.808 | 1.004 | 0.945 | 0.996 | 0.997 |
| 1372822_at   | BI287226 | Transcribed locus | --- | 0.794 | 0.331 | 0.655 | 0.015 | 0.979 | 0.774 | 0.763 | 0.010 |
| 1391016_at   | AI235914 | Transcribed locus | --- | 1.135 | 0.331 | 1.357 | 0.725 | 0.576 | 0.084 | 1.361 | 0.556 |
| 1379797_at   | AI229704 | Transcribed locus | --- | 1.441 | 0.331 | 1.664 | 0.094 | 1.782 | 0.025 | 1.081 | 0.150 |
| 1378103_at   | AI406799 | Transcribed locus | --- | 1.301 | 0.332 | 1.136 | 0.391 | 1.093 | 0.605 | 1.146 | 0.838 |
| 1397108_at   | BE110342 | Transcribed locus | --- | 2.062 | 0.332 | 1.159 | 0.343 | 1.906 | 0.028 | 1.281 | 0.166 |
| 1390526_at   | BI289484 | Transcribed locus | --- | 1.131 | 0.332 | 0.588 | 0.005 | 1.000 | 0.152 | 0.560 | 0.004 |
| 1393577_at   | AI058546 | Transcribed locus | --- | 1.638 | 0.332 | 0.933 | 0.984 | 1.568 | 0.200 | 0.815 | 0.076 |
| 1377162_at   | BF390386 | Transcribed locus | --- | 0.834 | 0.332 | 1.369 | 0.137 | 0.599 | 0.107 | 1.113 | 0.127 |
| 1390117_at   | BG372455 | Transcribed locus | --- | 1.136 | 0.334 | 0.887 | 0.545 | 0.961 | 0.830 | 0.648 | 0.040 |
| 1394209_at   | AI236275 | Transcribed locus | --- | 0.633 | 0.334 | 0.258 | 0.017 | 0.679 | 0.238 | 0.306 | 0.017 |
| 1381974_at   | AI101499 | Transcribed locus | --- | 0.478 | 0.335 | 0.594 | 0.009 | 0.377 | 0.015 | 0.439 | 0.001 |
| 1382969_at   | AI029559 | Transcribed locus | --- | 1.501 | 0.335 | 0.504 | 0.016 | 1.024 | 0.722 | 0.393 | 0.001 |
| 1377770_at   | AI168965 | Transcribed locus | --- | 0.849 | 0.335 | 0.826 | 0.405 | 0.639 | 0.072 | 0.804 | 0.425 |
| 1376331_at   | BI295137 | Transcribed locus | --- | 0.647 | 0.335 | 0.389 | 0.117 | 0.640 | 0.054 | 0.632 | 0.245 |
| 1389692_at   | BM391905 | Transcribed locus | --- | 1.004 | 0.336 | 0.462 | 0.065 | 0.567 | 0.247 | 0.467 | 0.012 |
| 1397854_at   | BI275309 | Transcribed locus | --- | 0.626 | 0.336 | 0.743 | 0.068 | 1.072 | 0.381 | 0.679 | 0.043 |
| 1375370_at   | BE119626 | Transcribed locus | --- | 1.443 | 0.336 | 2.012 | 0.034 | 1.670 | 0.278 | 1.501 | 0.013 |
| 1390499_at   | BG380393 | Transcribed locus | --- | 0.696 | 0.337 | 0.680 | 0.028 | 0.697 | 0.338 | 0.683 | 0.034 |
| 1389565_at   | BE113491 | Transcribed locus | --- | 0.904 | 0.337 | 0.332 | 0.009 | 1.482 | 0.830 | 0.344 | 0.060 |
| 1374335_at   | AA800786 | Transcribed locus | --- | 2.171 | 0.338 | 0.791 | 0.075 | 2.124 | 0.373 | 0.893 | 0.440 |
| 1388437_at   | AI103153 | Transcribed locus | --- | 1.123 | 0.338 | 0.530 | 0.005 | 1.037 | 0.771 | 0.491 | 0.032 |
| 1382568_at   | BE098457 | Transcribed locus | --- | 1.430 | 0.338 | 2.730 | 0.000 | 0.833 | 0.648 | 1.987 | 0.009 |
| 1376577_at   | AI145247 | Transcribed locus | --- | 0.650 | 0.339 | 0.220 | 0.000 | 0.771 | 0.386 | 0.290 | 0.002 |
| 1377185_at   | BG667451 | Transcribed locus | --- | 1.542 | 0.340 | 0.392 | 0.024 | 1.449 | 0.021 | 0.658 | 0.180 |
| 1382953_at   | AI043711 | Transcribed locus | --- | 1.612 | 0.341 | 1.061 | 0.647 | 0.941 | 0.704 | 1.148 | 0.873 |
| 1399059_at   | BI283868 | Transcribed locus | --- | 1.059 | 0.341 | 1.229 | 0.090 | 0.903 | 0.106 | 1.107 | 0.166 |
| 1382636_at   | AA899383 | Transcribed locus | --- | 1.296 | 0.342 | 0.778 | 0.069 | 0.760 | 0.559 | 0.863 | 0.009 |
| 1397536_at   | BF564825 | Transcribed locus | --- | 1.466 | 0.342 | 1.166 | 0.629 | 1.506 | 0.176 | 1.285 | 0.248 |
| 1373829_at   | AI412658 | Transcribed locus | --- | 1.179 | 0.343 | 1.065 | 0.814 | 0.935 | 0.345 | 0.937 | 0.817 |
| 1372175_at   | BE112899 | Transcribed locus | --- | 0.833 | 0.343 | 0.650 | 0.000 | 1.001 | 0.836 | 0.664 | 0.007 |
| 1398346_at   | BI275581 | Transcribed locus | --- | 0.763 | 0.343 | 0.732 | 0.104 | 0.525 | 0.080 | 0.962 | 0.431 |
| 1378778_a_at | BF394727 | Transcribed locus | --- | 1.459 | 0.343 | 1.234 | 0.349 | 1.901 | 0.004 | 1.082 | 0.415 |
| 1372231_at   | AA893532 | Transcribed locus | --- | 0.948 | 0.343 | 1.723 | 0.013 | 0.921 | 0.450 | 1.499 | 0.038 |
| 1377111_at   | BI295188 | Transcribed locus | --- | 0.929 | 0.343 | 2.743 | 0.058 | 0.312 | 0.136 | 2.107 | 0.058 |
| 1390985_at   | AA956519 | Transcribed locus | --- | 0.855 | 0.344 | 0.460 | 0.018 | 0.898 | 0.370 | 0.610 | 0.403 |
| 1389430_at   | AI176172 | Transcribed locus | --- | 0.768 | 0.344 | 0.603 | 0.043 | 0.534 | 0.236 | 0.536 | 0.017 |
| 1383112_at   | BF550315 | Transcribed locus | --- | 1.650 | 0.344 | 0.731 | 0.160 | 1.448 | 0.071 | 0.644 | 0.066 |
| 1398392_at   | BF405932 | Transcribed locus | --- | 0.650 | 0.345 | 0.404 | 0.009 | 0.942 | 0.445 | 0.793 | 0.096 |
| 1374476_at   | AA866267 | Transcribed locus | --- | 0.977 | 0.346 | 1.057 | 0.524 | 1.354 | 0.745 | 1.493 | 0.066 |
| 1380225_at   | BF396725 | Transcribed locus | --- | 0.863 | 0.347 | 0.975 | 0.537 | 1.211 | 0.429 | 0.985 | 0.201 |
| 1376627_at   | BF550404 | Transcribed locus | --- | 1.065 | 0.347 | 1.465 | 0.248 | 1.350 | 0.567 | 1.604 | 0.077 |
| 1378840_at   | BF402541 | Transcribed locus | --- | 0.606 | 0.347 | 0.804 | 0.899 | 0.968 | 0.794 | 0.969 | 0.881 |
| 1383510_at   | AI230360 | Transcribed locus | --- | 1.099 | 0.347 | 1.049 | 0.904 | 0.664 | 0.043 | 1.013 | 0.572 |
| 1374609_at   | AI011183 | Transcribed locus | --- | 1.032 | 0.348 | 0.497 | 0.001 | 0.885 | 0.563 | 0.624 | 0.015 |
| 1382060_at   | BE115085 | Transcribed locus | --- | 1.190 | 0.348 | 0.256 | 0.001 | 1.037 | 0.326 | 0.408 | 0.101 |
| 1382633_at   | BE120748 | Transcribed locus | --- | 1.095 | 0.349 | 1.130 | 0.751 | 1.204 | 0.533 | 1.183 | 0.738 |
| 1393153_at   | BG663023 | Transcribed locus | --- | 1.175 | 0.349 | 0.547 | 0.014 | 1.411 | 0.020 | 0.508 | 0.001 |
| 1375721_at   | BF408438 | Transcribed locus | --- | 1.028 | 0.349 | 0.525 | 0.217 | 1.004 | 0.907 | 0.525 | 0.171 |
| 1382308_at   | AI717668 | Transcribed locus | --- | 1.176 | 0.350 | 0.504 | 0.036 | 1.087 | 0.907 | 0.496 | 0.044 |
| 1374880_at   | AW251285 | Transcribed locus | --- | 0.886 | 0.351 | 1.103 | 0.169 | 0.889 | 0.338 | 1.510 | 0.169 |
| 1396083_at   | BM390018 | Transcribed locus | --- | 0.584 | 0.352 | 1.406 | 0.180 | 0.616 | 0.218 | 0.986 | 0.198 |
| 1374081_at   | AI011704 | Transcribed locus | --- | 0.702 | 0.352 | 0.540 | 0.002 | 0.762 | 0.284 | 0.457 | 0.002 |
| 1394569_at   | AI549154 | Transcribed locus | --- | 1.716 | 0.352 | 0.777 | 0.214 | 1.787 | 0.069 | 0.732 | 0.198 |
| 1382760_at   | AA899481 | Transcribed locus | --- | 0.894 | 0.353 | 2.107 | 0.267 | 0.766 | 0.192 | 2.129 | 0.027 |
| 1384270_at   | BG375371 | Transcribed locus | --- | 0.799 | 0.353 | 0.940 | 0.897 | 0.892 | 0.653 | 0.580 | 0.021 |



|              |          |                   |     |       |       |       |       |       |       |       |       |
|--------------|----------|-------------------|-----|-------|-------|-------|-------|-------|-------|-------|-------|
| 1372354_at   | BM389898 | Transcribed locus | --- | 1.602 | 0.354 | 6.511 | 0.002 | 2.602 | 0.009 | 7.278 | 0.003 |
| 1374918_at   | BM392219 | Transcribed locus | --- | 0.734 | 0.354 | 1.387 | 0.398 | 1.004 | 0.669 | 1.858 | 0.079 |
| 1373249_at   | AA817861 | Transcribed locus | --- | 0.758 | 0.355 | 0.712 | 0.182 | 0.522 | 0.298 | 0.864 | 0.301 |
| 1372763_at   | AI407545 | Transcribed locus | --- | 0.445 | 0.355 | 0.354 | 0.004 | 0.706 | 0.379 | 0.469 | 0.009 |
| 1394570_at   | BF284360 | Transcribed locus | --- | 0.812 | 0.355 | 0.603 | 0.004 | 0.708 | 0.272 | 0.796 | 0.014 |
| 1375517_at   | AI171654 | Transcribed locus | --- | 1.380 | 0.356 | 0.669 | 0.000 | 1.051 | 0.863 | 0.878 | 0.283 |
| 1384926_at   | AA964975 | Transcribed locus | --- | 0.496 | 0.357 | 0.469 | 0.041 | 0.802 | 0.604 | 1.089 | 0.765 |
| 1375639_at   | AA850881 | Transcribed locus | --- | 0.632 | 0.357 | 0.931 | 0.448 | 0.603 | 0.022 | 1.152 | 0.463 |
| 1390198_at   | AW523642 | Transcribed locus | --- | 0.736 | 0.358 | 0.236 | 0.014 | 0.836 | 0.178 | 0.384 | 0.014 |
| 1390129_at   | AI177861 | Transcribed locus | --- | 0.991 | 0.358 | 1.166 | 0.166 | 0.966 | 0.739 | 0.952 | 0.794 |
| 1398333_at   | AI598434 | Transcribed locus | --- | 0.255 | 0.359 | 1.549 | 0.036 | 0.159 | 0.008 | 0.988 | 0.953 |
| 1375760_at   | AI070270 | Transcribed locus | --- | 0.851 | 0.359 | 0.966 | 0.668 | 0.898 | 0.189 | 0.846 | 0.290 |
| 1384745_at   | BE111824 | Transcribed locus | --- | 1.647 | 0.359 | 1.093 | 0.839 | 1.373 | 0.177 | 1.406 | 0.717 |
| 1378007_at   | BE103359 | Transcribed locus | --- | 0.722 | 0.360 | 0.380 | 0.009 | 0.958 | 0.200 | 0.564 | 0.153 |
| 1397244_at   | AI535406 | Transcribed locus | --- | 0.980 | 0.360 | 1.107 | 0.812 | 1.025 | 0.925 | 1.264 | 0.169 |
| 1392413_at   | BE111448 | Transcribed locus | --- | 0.892 | 0.360 | 1.052 | 0.734 | 0.764 | 0.025 | 1.019 | 0.407 |
| 1372220_at   | BI278846 | Transcribed locus | --- | 1.231 | 0.360 | 1.017 | 0.182 | 1.228 | 0.032 | 1.083 | 0.152 |
| 1376400_at   | BG380445 | Transcribed locus | --- | 1.743 | 0.362 | 2.424 | 0.016 | 1.387 | 0.438 | 1.105 | 0.033 |
| 1382343_at   | AA999037 | Transcribed locus | --- | 1.281 | 0.362 | 1.668 | 0.021 | 0.936 | 0.551 | 1.585 | 0.122 |
| 1381333_at   | BI294382 | Transcribed locus | --- | 1.495 | 0.362 | 0.722 | 0.012 | 0.980 | 0.943 | 1.024 | 0.961 |
| 1397265_at   | AW529600 | Transcribed locus | --- | 1.311 | 0.362 | 0.654 | 0.266 | 1.135 | 0.181 | 0.781 | 0.103 |
| 1384907_at   | AI411835 | Transcribed locus | --- | 0.606 | 0.364 | 0.280 | 0.004 | 0.457 | 0.073 | 0.373 | 0.043 |
| 1391877_at   | BF405044 | Transcribed locus | --- | 1.287 | 0.365 | 0.940 | 0.549 | 1.286 | 0.825 | 0.668 | 0.053 |
| 1389241_at   | AA800593 | Transcribed locus | --- | 1.072 | 0.366 | 0.730 | 0.009 | 1.133 | 0.093 | 0.908 | 0.532 |
| 1376318_at   | BE113300 | Transcribed locus | --- | 0.950 | 0.366 | 0.995 | 0.480 | 0.897 | 0.297 | 1.002 | 0.327 |
| 1376979_at   | BF393959 | Transcribed locus | --- | 0.948 | 0.366 | 0.890 | 0.403 | 2.419 | 0.054 | 0.926 | 0.815 |
| 1394474_at   | BF396804 | Transcribed locus | --- | 1.022 | 0.367 | 0.982 | 0.890 | 0.661 | 0.980 | 1.511 | 0.158 |
| 1383577_at   | AA859277 | Transcribed locus | --- | 0.819 | 0.367 | 0.741 | 0.013 | 0.834 | 0.393 | 0.521 | 0.063 |
| 1371906_at   | BF288092 | Transcribed locus | --- | 1.064 | 0.369 | 0.871 | 0.953 | 1.331 | 0.175 | 0.870 | 0.289 |
| 1372749_at   | AI009786 | Transcribed locus | --- | 1.692 | 0.369 | 0.895 | 0.154 | 1.384 | 0.198 | 0.827 | 0.037 |
| 1382306_at   | AW919478 | Transcribed locus | --- | 0.798 | 0.370 | 0.984 | 0.988 | 0.749 | 0.380 | 1.007 | 0.997 |
| 1395325_s_at | BF564628 | Transcribed locus | --- | 0.726 | 0.370 | 1.111 | 0.889 | 0.570 | 0.100 | 1.043 | 0.627 |
| 1382795_at   | AI228346 | Transcribed locus | --- | 0.789 | 0.370 | 0.805 | 0.116 | 1.014 | 0.995 | 0.971 | 0.865 |
| 1383466_at   | BG667930 | Transcribed locus | --- | 0.601 | 0.370 | 0.272 | 0.023 | 0.717 | 0.128 | 0.302 | 0.012 |
| 1396302_at   | BM389727 | Transcribed locus | --- | 0.816 | 0.371 | 0.904 | 0.170 | 0.896 | 0.473 | 1.039 | 0.517 |
| 1397225_at   | AA875647 | Transcribed locus | --- | 1.252 | 0.372 | 0.712 | 0.312 | 1.701 | 0.211 | 0.771 | 0.269 |
| 1396772_at   | BE116581 | Transcribed locus | --- | 0.591 | 0.373 | 0.985 | 0.100 | 0.677 | 0.307 | 1.061 | 0.944 |
| 1392964_at   | BF559822 | Transcribed locus | --- | 1.872 | 0.373 | 1.947 | 0.050 | 1.356 | 0.580 | 1.902 | 0.059 |
| 1377782_at   | BF402614 | Transcribed locus | --- | 0.807 | 0.373 | 1.002 | 0.986 | 0.972 | 0.869 | 0.947 | 0.995 |
| 1374001_at   | AA851818 | Transcribed locus | --- | 0.925 | 0.374 | 0.676 | 0.192 | 0.937 | 0.540 | 0.813 | 0.129 |
| 1373529_at   | BE117883 | Transcribed locus | --- | 0.781 | 0.375 | 0.696 | 0.003 | 0.520 | 0.004 | 0.826 | 0.027 |
| 1391880_at   | AA893670 | Transcribed locus | --- | 0.839 | 0.375 | 0.998 | 0.978 | 0.641 | 0.012 | 0.952 | 0.331 |
| 1382698_at   | AI030699 | Transcribed locus | --- | 1.222 | 0.375 | 0.384 | 0.006 | 1.208 | 0.511 | 0.595 | 0.062 |
| 1371537_at   | AI179422 | Transcribed locus | --- | 1.200 | 0.376 | 1.553 | 0.649 | 4.643 | 0.046 | 1.798 | 0.147 |
| 1373180_at   | AI227919 | Transcribed locus | --- | 0.741 | 0.376 | 0.729 | 0.001 | 0.718 | 0.014 | 0.809 | 0.005 |
| 1377366_at   | BF389753 | Transcribed locus | --- | 0.532 | 0.377 | 0.541 | 0.020 | 0.395 | 0.016 | 0.554 | 0.026 |
| 1374641_at   | BF397653 | Transcribed locus | --- | 1.753 | 0.377 | 1.943 | 0.103 | 1.487 | 0.229 | 1.925 | 0.026 |
| 1374946_at   | BI296261 | Transcribed locus | --- | 0.647 | 0.377 | 1.054 | 0.863 | 0.634 | 0.623 | 0.818 | 0.358 |
| 1381627_at   | AW529790 | Transcribed locus | --- | 1.040 | 0.377 | 1.017 | 0.655 | 1.092 | 0.805 | 1.124 | 0.407 |
| 1385675_at   | BG376858 | Transcribed locus | --- | 1.540 | 0.378 | 0.983 | 0.984 | 0.999 | 0.989 | 1.004 | 0.991 |
| 1376341_at   | BM388895 | Transcribed locus | --- | 1.553 | 0.378 | 0.563 | 0.151 | 1.564 | 0.348 | 0.774 | 0.102 |
| 1388558_at   | AI171802 | Transcribed locus | --- | 1.161 | 0.379 | 0.700 | 0.004 | 0.866 | 0.238 | 0.870 | 0.048 |
| 1381899_at   | AW534794 | Transcribed locus | --- | 1.749 | 0.379 | 1.236 | 0.612 | 2.082 | 0.056 | 1.361 | 0.216 |
| 1390921_at   | BG373223 | Transcribed locus | --- | 1.119 | 0.379 | 0.578 | 0.025 | 1.186 | 0.043 | 1.167 | 0.083 |
| 1380606_at   | BF404346 | Transcribed locus | --- | 1.339 | 0.381 | 1.045 | 0.482 | 0.755 | 0.373 | 1.050 | 0.753 |
| 1377990_at   | BF396815 | Transcribed locus | --- | 0.843 | 0.382 | 0.926 | 0.698 | 0.926 | 0.914 | 0.656 | 0.039 |
| 1381476_at   | BF416405 | Transcribed locus | --- | 1.067 | 0.382 | 0.719 | 0.978 | 0.947 | 0.304 | 0.856 | 0.205 |
| 1372332_at   | AI170687 | Transcribed locus | --- | 1.624 | 0.384 | 0.804 | 0.117 | 4.965 | 0.004 | 1.440 | 0.290 |
| 1393410_at   | BG666397 | Transcribed locus | --- | 1.845 | 0.385 | 1.695 | 0.328 | 1.448 | 0.323 | 4.043 | 0.025 |
| 1376744_at   | BI289572 | Transcribed locus | --- | 1.001 | 0.385 | 0.865 | 0.234 | 0.945 | 0.169 | 1.014 | 0.070 |
| 1377394_at   | BF387305 | Transcribed locus | --- | 1.083 | 0.386 | 0.469 | 0.042 | 1.123 | 0.732 | 0.592 | 0.051 |

|              |          |                   |     |       |       |       |       |       |       |       |       |
|--------------|----------|-------------------|-----|-------|-------|-------|-------|-------|-------|-------|-------|
| 1390813_at   | AI236624 | Transcribed locus | --- | 1.193 | 0.387 | 0.681 | 0.017 | 1.377 | 0.146 | 0.958 | 0.830 |
| 1394643_at   | AA819409 | Transcribed locus | --- | 0.969 | 0.387 | 1.191 | 0.152 | 1.090 | 0.227 | 1.188 | 0.406 |
| 1380718_at   | AI600021 | Transcribed locus | --- | 1.226 | 0.388 | 0.472 | 0.021 | 1.008 | 0.912 | 0.774 | 0.018 |
| 1372502_at   | AI579645 | Transcribed locus | --- | 0.400 | 0.388 | 0.312 | 0.023 | 0.475 | 0.011 | 0.273 | 0.061 |
| 1379272_at   | AA963084 | Transcribed locus | --- | 0.816 | 0.388 | 0.791 | 0.061 | 0.868 | 0.190 | 0.663 | 0.496 |
| 1367545_at   | AI710043 | Transcribed locus | --- | 1.143 | 0.389 | 0.919 | 0.208 | 0.604 | 0.094 | 0.823 | 0.361 |
| 1377975_at   | AI100827 | Transcribed locus | --- | 0.819 | 0.389 | 0.562 | 0.001 | 1.004 | 0.853 | 0.584 | 0.031 |
| 1379785_at   | BI275894 | Transcribed locus | --- | 0.846 | 0.389 | 1.405 | 0.008 | 1.319 | 0.471 | 1.412 | 0.030 |
| 1375943_at   | BI288873 | Transcribed locus | --- | 0.828 | 0.389 | 0.194 | 0.000 | 0.940 | 0.858 | 0.302 | 0.001 |
| 1372802_at   | AI172500 | Transcribed locus | --- | 1.387 | 0.390 | 1.656 | 0.032 | 0.865 | 0.971 | 1.608 | 0.084 |
| 1378790_at   | AW535379 | Transcribed locus | --- | 0.815 | 0.390 | 1.079 | 0.979 | 0.819 | 0.381 | 1.012 | 0.523 |
| 1373932_at   | BE098739 | Transcribed locus | --- | 1.382 | 0.390 | 5.095 | 0.011 | 1.766 | 0.007 | 2.093 | 0.016 |
| 1389730_at   | AI176502 | Transcribed locus | --- | 1.119 | 0.391 | 0.515 | 0.008 | 0.820 | 0.576 | 0.708 | 0.040 |
| 1375005_at   | BF403824 | Transcribed locus | --- | 1.248 | 0.392 | 0.823 | 0.943 | 1.053 | 0.717 | 0.561 | 0.506 |
| 1397531_at   | BF522208 | Transcribed locus | --- | 0.808 | 0.392 | 0.682 | 0.016 | 0.874 | 0.011 | 0.663 | 0.002 |
| 1391552_at   | BM391661 | Transcribed locus | --- | 0.805 | 0.392 | 0.503 | 0.087 | 0.619 | 0.140 | 0.362 | 0.011 |
| 1392091_at   | AI043891 | Transcribed locus | --- | 1.001 | 0.393 | 1.352 | 0.189 | 1.385 | 0.509 | 1.101 | 0.682 |
| 1388486_at   | BG671315 | Transcribed locus | --- | 0.866 | 0.393 | 0.266 | 0.000 | 1.273 | 0.095 | 0.329 | 0.032 |
| 1388735_at   | BF405161 | Transcribed locus | --- | 1.367 | 0.393 | 1.059 | 0.755 | 1.266 | 0.294 | 0.999 | 0.749 |
| 1395294_at   | BE106134 | Transcribed locus | --- | 1.358 | 0.394 | 0.544 | 0.241 | 1.693 | 0.337 | 0.752 | 0.008 |
| 1379886_at   | AA997880 | Transcribed locus | --- | 1.008 | 0.394 | 1.072 | 0.569 | 1.092 | 0.706 | 1.099 | 0.427 |
| 1374714_at   | BI284781 | Transcribed locus | --- | 0.592 | 0.395 | 0.578 | 0.015 | 0.948 | 0.888 | 0.537 | 0.003 |
| 1377333_at   | BE114427 | Transcribed locus | --- | 1.187 | 0.395 | 0.411 | 0.072 | 1.780 | 0.036 | 0.326 | 0.015 |
| 1374893_at   | BG380384 | Transcribed locus | --- | 0.460 | 0.395 | 2.468 | 0.005 | 0.213 | 0.072 | 2.385 | 0.017 |
| 1391423_at   | AA944812 | Transcribed locus | --- | 0.918 | 0.395 | 1.328 | 0.005 | 0.971 | 0.897 | 1.376 | 0.032 |
| 1382336_at   | AI236491 | Transcribed locus | --- | 0.941 | 0.395 | 0.588 | 0.004 | 0.960 | 0.211 | 0.660 | 0.010 |
| 1382585_at   | AW529128 | Transcribed locus | --- | 1.169 | 0.395 | 0.982 | 0.261 | 0.813 | 0.095 | 0.947 | 0.860 |
| 1384484_at   | AI172598 | Transcribed locus | --- | 1.175 | 0.395 | 0.666 | 0.031 | 1.181 | 0.223 | 1.052 | 0.183 |
| 1385677_s_at | BG372143 | Transcribed locus | --- | 0.914 | 0.396 | 0.790 | 0.124 | 1.024 | 0.710 | 1.115 | 0.452 |
| 1397328_at   | AI555961 | Transcribed locus | --- | 1.002 | 0.397 | 0.952 | 0.563 | 0.958 | 0.202 | 0.646 | 0.178 |
| 1389039_at   | BM386520 | Transcribed locus | --- | 1.228 | 0.398 | 0.999 | 0.983 | 0.932 | 0.523 | 0.960 | 0.299 |
| 1381988_at   | AI029833 | Transcribed locus | --- | 0.729 | 0.398 | 0.509 | 0.031 | 0.324 | 0.040 | 0.356 | 0.011 |
| 1383468_at   | BM958512 | Transcribed locus | --- | 0.982 | 0.399 | 0.537 | 0.013 | 0.980 | 0.707 | 0.447 | 0.028 |
| 1377932_at   | AI556063 | Transcribed locus | --- | 1.589 | 0.399 | 0.772 | 0.255 | 1.536 | 0.456 | 0.834 | 0.083 |
| 1384058_at   | AI059089 | Transcribed locus | --- | 1.489 | 0.399 | 0.957 | 0.319 | 1.303 | 0.375 | 1.273 | 0.643 |
| 1393224_at   | AW529774 | Transcribed locus | --- | 0.880 | 0.400 | 0.712 | 0.003 | 0.936 | 0.449 | 0.785 | 0.222 |
| 1379468_at   | BI281734 | Transcribed locus | --- | 1.407 | 0.400 | 0.802 | 0.385 | 1.002 | 0.994 | 0.794 | 0.099 |
| 1393181_at   | BG663084 | Transcribed locus | --- | 0.810 | 0.401 | 0.385 | 0.009 | 1.555 | 0.601 | 1.045 | 0.580 |
| 1390508_at   | BI284393 | Transcribed locus | --- | 0.759 | 0.401 | 0.940 | 0.479 | 0.525 | 0.094 | 0.738 | 0.075 |
| 1383661_at   | AA926037 | Transcribed locus | --- | 0.980 | 0.401 | 1.557 | 0.119 | 0.693 | 0.252 | 1.024 | 0.826 |
| 1372257_at   | BG662579 | Transcribed locus | --- | 1.035 | 0.401 | 0.679 | 0.018 | 0.815 | 0.501 | 0.838 | 0.017 |
| 1378173_at   | BF397791 | Transcribed locus | --- | 0.803 | 0.402 | 1.024 | 0.554 | 0.718 | 0.005 | 1.226 | 0.977 |
| 1386310_at   | AI412779 | Transcribed locus | --- | 1.302 | 0.402 | 1.159 | 0.603 | 1.014 | 0.973 | 2.262 | 0.106 |
| 1378152_at   | AI170349 | Transcribed locus | --- | 0.832 | 0.402 | 1.145 | 0.919 | 1.785 | 0.061 | 1.467 | 0.077 |
| 1371538_at   | BF407786 | Transcribed locus | --- | 0.690 | 0.402 | 0.453 | 0.009 | 0.776 | 0.369 | 0.619 | 0.190 |
| 1390247_at   | BI275999 | Transcribed locus | --- | 1.195 | 0.403 | 0.692 | 0.849 | 1.367 | 0.435 | 0.817 | 0.998 |
| 1375984_at   | BE103689 | Transcribed locus | --- | 1.810 | 0.403 | 1.091 | 0.981 | 2.393 | 0.430 | 1.575 | 0.581 |
| 1396153_at   | AI555740 | Transcribed locus | --- | 0.706 | 0.404 | 1.120 | 0.454 | 1.373 | 0.066 | 1.547 | 0.003 |
| 1395819_at   | AW526127 | Transcribed locus | --- | 1.885 | 0.404 | 1.187 | 0.754 | 0.573 | 0.178 | 1.009 | 0.621 |
| 1396925_at   | BF542680 | Transcribed locus | --- | 1.682 | 0.405 | 1.076 | 0.682 | 1.410 | 0.368 | 1.258 | 0.449 |
| 1376965_at   | BM389656 | Transcribed locus | --- | 0.777 | 0.406 | 1.010 | 0.359 | 0.899 | 0.022 | 0.884 | 0.455 |
| 1397719_at   | AI716857 | Transcribed locus | --- | 1.010 | 0.406 | 2.604 | 0.038 | 1.202 | 0.033 | 3.162 | 0.032 |
| 1392383_at   | BF405619 | Transcribed locus | --- | 2.276 | 0.407 | 1.039 | 0.944 | 1.714 | 0.250 | 1.095 | 0.414 |
| 1392316_at   | BI293349 | Transcribed locus | --- | 1.598 | 0.407 | 1.675 | 0.117 | 1.676 | 0.055 | 1.383 | 0.117 |
| 1382042_at   | AI137817 | Transcribed locus | --- | 1.158 | 0.408 | 0.994 | 0.245 | 1.395 | 0.173 | 0.689 | 0.112 |
| 1390909_at   | AI171480 | Transcribed locus | --- | 1.153 | 0.408 | 1.072 | 0.798 | 2.400 | 0.021 | 1.258 | 0.286 |
| 1374059_at   | AI177428 | Transcribed locus | --- | 0.966 | 0.408 | 0.807 | 0.002 | 1.057 | 0.841 | 0.754 | 0.054 |
| 1395552_s_at | BG671371 | Transcribed locus | --- | 1.070 | 0.409 | 0.835 | 0.472 | 0.838 | 0.763 | 0.885 | 0.301 |
| 1395147_at   | BE116565 | Transcribed locus | --- | 1.378 | 0.409 | 5.019 | 0.000 | 1.361 | 0.279 | 5.555 | 0.000 |
| 1377188_at   | BI296291 | Transcribed locus | --- | 0.772 | 0.410 | 1.014 | 0.664 | 0.990 | 0.399 | 0.980 | 0.463 |
| 1376409_at   | AI176677 | Transcribed locus | --- | 1.080 | 0.410 | 0.609 | 0.037 | 1.031 | 0.874 | 0.604 | 0.017 |

|            |          |                   |     |       |       |       |       |       |       |       |       |
|------------|----------|-------------------|-----|-------|-------|-------|-------|-------|-------|-------|-------|
| 1392945_at | BE115154 | Transcribed locus | --- | 1.450 | 0.410 | 0.978 | 0.706 | 0.939 | 0.787 | 0.915 | 0.411 |
| 1395654_at | BI278299 | Transcribed locus | --- | 1.807 | 0.411 | 0.996 | 0.999 | 1.682 | 0.197 | 0.826 | 0.325 |
| 1396186_at | BE095907 | Transcribed locus | --- | 1.762 | 0.412 | 0.980 | 0.413 | 0.961 | 0.788 | 1.117 | 0.193 |
| 1381736_at | BF405604 | Transcribed locus | --- | 1.132 | 0.412 | 0.966 | 0.522 | 1.002 | 0.991 | 1.094 | 0.787 |
| 1374521_at | AI230320 | Transcribed locus | --- | 1.241 | 0.412 | 0.875 | 0.356 | 1.294 | 0.806 | 0.777 | 0.150 |
| 1390169_at | AW144331 | Transcribed locus | --- | 1.103 | 0.412 | 0.780 | 0.062 | 1.351 | 0.686 | 0.800 | 0.034 |
| 1377523_at | BE113698 | Transcribed locus | --- | 0.688 | 0.412 | 0.221 | 0.001 | 1.786 | 0.348 | 0.306 | 0.004 |
| 1380664_at | BF416244 | Transcribed locus | --- | 1.232 | 0.413 | 1.398 | 0.988 | 0.995 | 0.989 | 0.980 | 0.907 |
| 1378909_at | BE120180 | Transcribed locus | --- | 0.800 | 0.413 | 0.292 | 0.011 | 0.455 | 0.001 | 0.756 | 0.102 |
| 1376434_at | AI101016 | Transcribed locus | --- | 1.614 | 0.414 | 0.666 | 0.342 | 2.661 | 0.098 | 1.365 | 0.504 |
| 1392636_at | AA964319 | Transcribed locus | --- | 0.658 | 0.415 | 0.258 | 0.004 | 0.540 | 0.047 | 0.213 | 0.029 |
| 1397545_at | BM386640 | Transcribed locus | --- | 1.036 | 0.416 | 0.558 | 0.090 | 1.693 | 0.092 | 0.919 | 0.996 |
| 1392985_at | BF555731 | Transcribed locus | --- | 0.861 | 0.416 | 0.983 | 0.618 | 1.062 | 0.828 | 1.062 | 0.442 |
| 1373855_at | AI171776 | Transcribed locus | --- | 0.597 | 0.416 | 1.107 | 0.078 | 0.368 | 0.010 | 0.990 | 0.213 |
| 1379415_at | AA998194 | Transcribed locus | --- | 1.221 | 0.417 | 0.986 | 0.944 | 0.904 | 0.649 | 1.037 | 0.136 |
| 1395931_at | BF408949 | Transcribed locus | --- | 0.819 | 0.417 | 1.220 | 0.324 | 0.919 | 0.143 | 1.226 | 0.864 |
| 1378785_at | BI288719 | Transcribed locus | --- | 1.054 | 0.417 | 1.001 | 0.912 | 1.001 | 0.999 | 1.278 | 0.259 |
| 1386376_at | AA892173 | Transcribed locus | --- | 0.929 | 0.417 | 0.954 | 0.869 | 0.968 | 0.493 | 0.998 | 0.955 |
| 1385753_at | BF395818 | Transcribed locus | --- | 0.829 | 0.418 | 0.900 | 0.534 | 0.530 | 0.270 | 1.039 | 0.348 |
| 1373039_at | AI600081 | Transcribed locus | --- | 0.684 | 0.418 | 1.246 | 0.252 | 0.524 | 0.012 | 1.075 | 0.289 |
| 1391464_at | BE104324 | Transcribed locus | --- | 1.492 | 0.418 | 1.121 | 0.712 | 0.997 | 0.972 | 0.859 | 0.677 |
| 1381290_at | AI101288 | Transcribed locus | --- | 0.795 | 0.418 | 0.404 | 0.039 | 0.862 | 0.115 | 0.611 | 0.099 |
| 1389669_at | BI296532 | Transcribed locus | --- | 0.789 | 0.419 | 0.827 | 0.463 | 1.007 | 0.928 | 0.946 | 0.902 |
| 1381026_at | BF391155 | Transcribed locus | --- | 1.165 | 0.419 | 1.096 | 0.999 | 0.923 | 0.697 | 1.194 | 0.997 |
| 1376655_at | AA850435 | Transcribed locus | --- | 0.659 | 0.419 | 0.793 | 0.003 | 0.723 | 0.101 | 0.852 | 0.029 |
| 1393268_at | AI071071 | Transcribed locus | --- | 0.639 | 0.419 | 0.707 | 0.286 | 0.572 | 0.016 | 0.615 | 0.416 |
| 1395121_at | BF394559 | Transcribed locus | --- | 1.497 | 0.421 | 0.999 | 0.701 | 1.893 | 0.035 | 0.960 | 0.276 |
| 1389529_at | AI409595 | Transcribed locus | --- | 0.948 | 0.422 | 0.917 | 0.151 | 1.083 | 0.751 | 0.926 | 0.180 |
| 1382423_at | AW920944 | Transcribed locus | --- | 0.792 | 0.422 | 1.281 | 0.147 | 0.902 | 0.098 | 0.926 | 0.034 |
| 1382549_at | AI071736 | Transcribed locus | --- | 0.758 | 0.423 | 0.862 | 0.370 | 0.848 | 0.783 | 0.745 | 0.025 |
| 1398430_at | AW524711 | Transcribed locus | --- | 0.782 | 0.423 | 0.341 | 0.003 | 1.086 | 0.969 | 0.405 | 0.053 |
| 1377924_at | BE113414 | Transcribed locus | --- | 1.347 | 0.423 | 1.726 | 0.343 | 1.652 | 0.194 | 1.267 | 0.245 |
| 1373867_at | BI289360 | Transcribed locus | --- | 1.293 | 0.424 | 1.186 | 0.065 | 1.135 | 0.336 | 1.168 | 0.022 |
| 1392385_at | BF398583 | Transcribed locus | --- | 0.938 | 0.424 | 0.855 | 0.376 | 1.571 | 0.053 | 1.252 | 0.034 |
| 1392293_at | BE113790 | Transcribed locus | --- | 1.366 | 0.426 | 0.859 | 0.319 | 1.137 | 0.680 | 0.427 | 0.056 |
| 1396989_at | BF402350 | Transcribed locus | --- | 1.562 | 0.426 | 1.709 | 0.793 | 1.838 | 0.014 | 1.067 | 0.957 |
| 1377043_at | BF388434 | Transcribed locus | --- | 0.951 | 0.426 | 0.774 | 0.094 | 0.946 | 0.313 | 0.753 | 0.158 |
| 1376149_at | BE100200 | Transcribed locus | --- | 1.137 | 0.426 | 1.133 | 0.029 | 1.418 | 0.039 | 1.150 | 0.084 |
| 1393440_at | AI071835 | Transcribed locus | --- | 1.823 | 0.426 | 1.424 | 0.288 | 2.907 | 0.047 | 2.569 | 0.093 |
| 1388749_at | BI278823 | Transcribed locus | --- | 0.521 | 0.427 | 0.424 | 0.002 | 0.593 | 0.007 | 0.480 | 0.003 |
| 1393495_at | AI043752 | Transcribed locus | --- | 0.862 | 0.427 | 0.745 | 0.013 | 0.967 | 0.781 | 0.950 | 0.185 |
| 1375886_at | AI236778 | Transcribed locus | --- | 0.567 | 0.427 | 0.454 | 0.039 | 0.387 | 0.171 | 0.472 | 0.001 |
| 1375828_at | BF390631 | Transcribed locus | --- | 2.049 | 0.429 | 0.808 | 0.049 | 1.573 | 0.397 | 0.908 | 0.340 |
| 1380125_at | BM384823 | Transcribed locus | --- | 0.845 | 0.430 | 0.857 | 0.441 | 1.795 | 0.489 | 1.455 | 0.039 |
| 1376872_at | BF283556 | Transcribed locus | --- | 2.977 | 0.430 | 0.638 | 0.021 | 1.351 | 0.691 | 0.945 | 0.546 |
| 1383791_at | BG664616 | Transcribed locus | --- | 0.249 | 0.430 | 0.608 | 0.052 | 0.812 | 0.668 | 0.444 | 0.020 |
| 1375090_at | AI579005 | Transcribed locus | --- | 0.958 | 0.432 | 1.011 | 0.136 | 0.780 | 0.461 | 0.938 | 0.509 |
| 1385342_at | AA998932 | Transcribed locus | --- | 1.078 | 0.432 | 0.932 | 0.287 | 0.834 | 0.998 | 0.875 | 0.437 |
| 1385618_at | AA858570 | Transcribed locus | --- | 0.613 | 0.433 | 0.852 | 0.240 | 1.151 | 0.048 | 0.940 | 0.550 |
| 1392580_at | BF282184 | Transcribed locus | --- | 0.606 | 0.434 | 0.552 | 0.093 | 0.485 | 0.035 | 0.719 | 0.031 |
| 1384281_at | BI295209 | Transcribed locus | --- | 1.281 | 0.434 | 1.300 | 0.090 | 1.744 | 0.013 | 1.922 | 0.107 |
| 1385054_at | BE104042 | Transcribed locus | --- | 1.162 | 0.437 | 0.784 | 0.036 | 2.033 | 0.034 | 0.660 | 0.385 |
| 1376214_at | AA850788 | Transcribed locus | --- | 0.947 | 0.437 | 1.458 | 0.064 | 0.640 | 0.368 | 1.225 | 0.189 |
| 1377257_at | BI290077 | Transcribed locus | --- | 0.543 | 0.438 | 0.500 | 0.238 | 0.442 | 0.052 | 0.464 | 0.089 |
| 1383529_at | BF549256 | Transcribed locus | --- | 0.809 | 0.439 | 0.609 | 0.117 | 0.678 | 0.130 | 0.501 | 0.012 |
| 1380713_at | BG376879 | Transcribed locus | --- | 0.881 | 0.440 | 1.044 | 0.809 | 0.905 | 0.620 | 1.042 | 0.484 |
| 1372666_at | BI284861 | Transcribed locus | --- | 0.982 | 0.443 | 1.051 | 0.063 | 1.003 | 0.185 | 1.048 | 0.149 |
| 1389799_at | BG378730 | Transcribed locus | --- | 0.658 | 0.445 | 1.230 | 0.626 | 0.896 | 0.028 | 0.887 | 0.413 |
| 1388553_at | BI290534 | Transcribed locus | --- | 1.026 | 0.445 | 0.617 | 0.017 | 1.357 | 0.058 | 0.706 | 0.038 |
| 1395581_at | BF389197 | Transcribed locus | --- | 0.912 | 0.446 | 0.600 | 0.272 | 0.929 | 0.283 | 0.961 | 0.191 |
| 1392084_at | BE109244 | Transcribed locus | --- | 0.918 | 0.446 | 0.899 | 0.740 | 0.971 | 0.806 | 0.731 | 0.564 |

|            |          |                   |     |       |       |       |       |       |       |       |       |
|------------|----------|-------------------|-----|-------|-------|-------|-------|-------|-------|-------|-------|
| 1383884_at | BF409598 | Transcribed locus | --- | 1.356 | 0.446 | 0.860 | 0.002 | 1.028 | 0.694 | 0.981 | 0.979 |
| 1374680_at | AA858731 | Transcribed locus | --- | 0.847 | 0.446 | 1.560 | 0.030 | 1.029 | 0.806 | 1.890 | 0.010 |
| 1375210_at | AW252841 | Transcribed locus | --- | 0.635 | 0.447 | 0.779 | 0.092 | 0.519 | 0.143 | 0.821 | 0.488 |
| 1392917_at | BI302971 | Transcribed locus | --- | 1.122 | 0.447 | 1.356 | 0.001 | 0.929 | 0.088 | 1.257 | 0.003 |
| 1393815_at | BM387050 | Transcribed locus | --- | 0.840 | 0.450 | 0.905 | 0.547 | 0.787 | 0.539 | 1.011 | 0.900 |
| 1372192_at | AI145385 | Transcribed locus | --- | 0.777 | 0.450 | 0.602 | 0.008 | 0.927 | 0.239 | 0.640 | 0.023 |
| 1394410_at | BF393802 | Transcribed locus | --- | 1.254 | 0.450 | 0.995 | 0.962 | 0.668 | 0.231 | 0.887 | 0.967 |
| 1393402_at | BG670858 | Transcribed locus | --- | 0.999 | 0.450 | 1.308 | 0.198 | 1.235 | 0.560 | 1.065 | 0.467 |
| 1386448_at | AI639182 | Transcribed locus | --- | 2.359 | 0.450 | 1.492 | 0.487 | 0.642 | 0.473 | 0.992 | 0.737 |
| 1394449_at | AW524715 | Transcribed locus | --- | 0.493 | 0.451 | 0.861 | 0.630 | 0.630 | 0.299 | 0.742 | 0.372 |
| 1383061_at | AI070680 | Transcribed locus | --- | 0.945 | 0.451 | 0.856 | 0.019 | 0.904 | 0.203 | 0.810 | 0.090 |
| 1381149_at | BI293484 | Transcribed locus | --- | 1.068 | 0.451 | 0.502 | 0.062 | 0.730 | 0.139 | 0.680 | 0.141 |
| 1388505_at | BE109642 | Transcribed locus | --- | 0.874 | 0.451 | 0.715 | 0.068 | 1.057 | 0.833 | 0.722 | 0.032 |
| 1390453_at | AI599873 | Transcribed locus | --- | 0.705 | 0.451 | 0.160 | 0.002 | 1.099 | 0.746 | 0.201 | 0.006 |
| 1381186_at | AW527770 | Transcribed locus | --- | 1.003 | 0.451 | 0.997 | 0.807 | 1.620 | 0.092 | 1.301 | 0.573 |
| 1393666_at | BE101321 | Transcribed locus | --- | 1.191 | 0.451 | 0.865 | 0.122 | 1.171 | 0.474 | 1.061 | 0.205 |
| 1393626_at | BF562507 | Transcribed locus | --- | 0.587 | 0.452 | 0.069 | 0.000 | 0.818 | 0.432 | 0.098 | 0.005 |
| 1382870_at | AI103536 | Transcribed locus | --- | 0.859 | 0.452 | 1.229 | 0.029 | 0.696 | 0.244 | 0.983 | 0.144 |
| 1392934_at | BM384509 | Transcribed locus | --- | 0.874 | 0.453 | 0.935 | 0.519 | 0.659 | 0.038 | 0.923 | 0.241 |
| 1399145_at | BF410891 | Transcribed locus | --- | 1.482 | 0.453 | 1.494 | 0.179 | 1.772 | 0.295 | 1.256 | 0.068 |
| 1386592_at | AI639154 | Transcribed locus | --- | 0.895 | 0.453 | 0.999 | 0.990 | 1.103 | 0.963 | 1.144 | 0.448 |
| 1391799_at | AA899247 | Transcribed locus | --- | 0.666 | 0.453 | 1.844 | 0.016 | 1.332 | 0.357 | 1.030 | 0.502 |
| 1379964_at | BF417011 | Transcribed locus | --- | 0.940 | 0.455 | 0.868 | 0.297 | 0.887 | 0.319 | 0.963 | 0.340 |
| 1386395_at | H31724   | Transcribed locus | --- | 0.999 | 0.455 | 1.016 | 0.981 | 1.002 | 0.997 | 1.013 | 0.962 |
| 1382236_at | BI288538 | Transcribed locus | --- | 1.061 | 0.455 | 0.707 | 0.063 | 1.213 | 0.059 | 0.965 | 0.787 |
| 1385191_at | AA997253 | Transcribed locus | --- | 1.089 | 0.456 | 0.650 | 0.013 | 1.088 | 0.507 | 0.547 | 0.016 |
| 1378797_at | BF394883 | Transcribed locus | --- | 0.883 | 0.456 | 0.867 | 0.681 | 1.503 | 0.032 | 1.173 | 0.272 |
| 1382731_at | AA818685 | Transcribed locus | --- | 0.688 | 0.457 | 0.782 | 0.361 | 1.523 | 0.849 | 0.747 | 0.808 |
| 1376734_at | BI279030 | Transcribed locus | --- | 0.999 | 0.457 | 0.926 | 0.463 | 1.964 | 0.085 | 0.694 | 0.189 |
| 1392660_at | BE119130 | Transcribed locus | --- | 1.314 | 0.458 | 0.864 | 0.381 | 1.494 | 0.119 | 0.911 | 0.606 |
| 1397185_at | BE102060 | Transcribed locus | --- | 0.621 | 0.458 | 0.441 | 0.176 | 0.427 | 0.010 | 0.691 | 0.066 |
| 1374652_at | BF285372 | Transcribed locus | --- | 1.275 | 0.459 | 0.770 | 0.314 | 0.468 | 0.011 | 0.647 | 0.055 |
| 1378253_at | AI555294 | Transcribed locus | --- | 1.061 | 0.461 | 0.808 | 0.007 | 0.987 | 0.625 | 0.763 | 0.006 |
| 1372583_at | AI009094 | Transcribed locus | --- | 0.773 | 0.461 | 0.600 | 0.047 | 2.174 | 0.013 | 0.919 | 0.886 |
| 1391148_at | AA957886 | Transcribed locus | --- | 1.218 | 0.462 | 1.643 | 0.579 | 1.169 | 0.444 | 1.290 | 0.846 |
| 1377197_at | BE108892 | Transcribed locus | --- | 0.986 | 0.463 | 0.595 | 0.019 | 0.860 | 0.371 | 0.640 | 0.024 |
| 1398990_at | BI281754 | Transcribed locus | --- | 0.425 | 0.463 | 0.243 | 0.002 | 0.204 | 0.019 | 0.243 | 0.023 |
| 1398421_at | BM384203 | Transcribed locus | --- | 1.178 | 0.463 | 0.641 | 0.215 | 1.205 | 0.242 | 0.647 | 0.125 |
| 1389072_at | AI412323 | Transcribed locus | --- | 0.960 | 0.463 | 1.122 | 0.538 | 1.263 | 0.110 | 1.129 | 0.813 |
| 1390924_at | BE109165 | Transcribed locus | --- | 0.839 | 0.464 | 0.740 | 0.275 | 1.008 | 0.990 | 0.934 | 0.183 |
| 1383284_at | BG372598 | Transcribed locus | --- | 0.806 | 0.464 | 0.959 | 0.331 | 0.852 | 0.493 | 0.700 | 0.112 |
| 1374927_at | AI714124 | Transcribed locus | --- | 0.680 | 0.465 | 0.507 | 0.001 | 0.626 | 0.135 | 0.558 | 0.001 |
| 1398548_at | BF389746 | Transcribed locus | --- | 1.304 | 0.466 | 1.165 | 0.672 | 1.558 | 0.694 | 0.738 | 0.979 |
| 1394779_at | AI717218 | Transcribed locus | --- | 1.164 | 0.467 | 3.146 | 0.001 | 2.263 | 0.015 | 1.909 | 0.043 |
| 1390442_at | BF284171 | Transcribed locus | --- | 0.749 | 0.467 | 1.708 | 0.093 | 0.981 | 0.817 | 0.761 | 0.246 |
| 1385029_at | BE110921 | Transcribed locus | --- | 1.062 | 0.467 | 1.366 | 0.465 | 3.282 | 0.030 | 1.238 | 0.159 |
| 1388451_at | AA817802 | Transcribed locus | --- | 0.976 | 0.468 | 0.417 | 0.000 | 1.192 | 0.270 | 0.656 | 0.010 |
| 1393414_at | AW142650 | Transcribed locus | --- | 0.925 | 0.468 | 0.502 | 0.010 | 0.862 | 0.276 | 0.857 | 0.308 |
| 1397596_at | H31511   | Transcribed locus | --- | 2.450 | 0.469 | 0.823 | 0.615 | 1.489 | 0.197 | 1.210 | 0.031 |
| 1391001_at | BE112519 | Transcribed locus | --- | 0.821 | 0.470 | 0.696 | 0.100 | 0.786 | 0.401 | 0.507 | 0.099 |
| 1376314_at | AI172148 | Transcribed locus | --- | 0.859 | 0.470 | 0.561 | 0.003 | 0.396 | 0.168 | 0.481 | 0.009 |
| 1385980_at | AI228059 | Transcribed locus | --- | 1.087 | 0.471 | 0.813 | 0.200 | 0.951 | 0.905 | 0.905 | 0.767 |
| 1372490_at | BF283759 | Transcribed locus | --- | 0.820 | 0.471 | 0.798 | 0.097 | 0.852 | 0.553 | 0.733 | 0.402 |
| 1372444_at | AW918352 | Transcribed locus | --- | 1.117 | 0.471 | 1.065 | 0.623 | 0.848 | 0.087 | 1.003 | 0.979 |
| 1394526_at | AI236935 | Transcribed locus | --- | 0.958 | 0.471 | 1.837 | 0.051 | 1.297 | 0.601 | 0.966 | 0.089 |
| 1384387_at | BE110061 | Transcribed locus | --- | 1.178 | 0.472 | 0.608 | 0.119 | 0.816 | 0.339 | 0.758 | 0.086 |
| 1386123_at | BF553538 | Transcribed locus | --- | 1.043 | 0.472 | 0.336 | 0.005 | 0.997 | 0.836 | 0.698 | 0.106 |
| 1383121_at | BM384218 | Transcribed locus | --- | 0.602 | 0.472 | 0.610 | 0.013 | 0.513 | 0.018 | 0.805 | 0.155 |
| 1377751_at | AI233227 | Transcribed locus | --- | 1.363 | 0.473 | 0.383 | 0.000 | 0.988 | 0.971 | 0.472 | 0.031 |
| 1379110_at | AI763769 | Transcribed locus | --- | 0.935 | 0.473 | 0.974 | 0.544 | 1.177 | 0.580 | 1.080 | 0.825 |
| 1397743_at | BF410216 | Transcribed locus | --- | 0.947 | 0.474 | 0.477 | 0.007 | 0.993 | 0.690 | 0.850 | 0.030 |

|              |          |                   |     |       |       |       |       |       |       |       |       |
|--------------|----------|-------------------|-----|-------|-------|-------|-------|-------|-------|-------|-------|
| 1376683_at   | AI175063 | Transcribed locus | --- | 0.512 | 0.475 | 0.979 | 0.149 | 1.049 | 0.400 | 0.769 | 0.185 |
| 1379058_at   | AA900904 | Transcribed locus | --- | 0.904 | 0.476 | 0.400 | 0.037 | 0.958 | 0.849 | 0.409 | 0.044 |
| 1393613_at   | BE117871 | Transcribed locus | --- | 0.923 | 0.476 | 0.394 | 0.002 | 0.801 | 0.183 | 0.494 | 0.016 |
| 1377740_at   | BF284600 | Transcribed locus | --- | 1.222 | 0.477 | 0.727 | 0.070 | 0.571 | 0.560 | 0.522 | 0.041 |
| 1396694_at   | BF400272 | Transcribed locus | --- | 0.641 | 0.477 | 0.684 | 0.198 | 0.626 | 0.157 | 0.802 | 0.193 |
| 1393405_at   | AA925444 | Transcribed locus | --- | 0.818 | 0.477 | 0.985 | 0.964 | 0.993 | 0.623 | 0.956 | 0.725 |
| 1393977_at   | BI288958 | Transcribed locus | --- | 0.778 | 0.477 | 0.437 | 0.039 | 0.415 | 0.012 | 0.454 | 0.045 |
| 1397638_at   | BF412682 | Transcribed locus | --- | 0.983 | 0.478 | 0.993 | 0.947 | 1.715 | 0.097 | 0.999 | 0.995 |
| 1373159_at   | AI411370 | Transcribed locus | --- | 0.857 | 0.478 | 1.023 | 0.322 | 0.769 | 0.030 | 0.986 | 0.551 |
| 1396321_at   | BE120690 | Transcribed locus | --- | 1.308 | 0.479 | 1.001 | 0.991 | 1.400 | 0.071 | 1.023 | 0.225 |
| 1374392_at   | BE113385 | Transcribed locus | --- | 1.007 | 0.481 | 0.580 | 0.017 | 0.954 | 0.962 | 0.652 | 0.010 |
| 1373555_at   | BM392315 | Transcribed locus | --- | 0.834 | 0.481 | 0.658 | 0.005 | 1.031 | 0.550 | 0.713 | 0.005 |
| 1375298_at   | BF408443 | Transcribed locus | --- | 0.878 | 0.481 | 0.691 | 0.127 | 0.895 | 0.535 | 0.614 | 0.025 |
| 1390445_at   | BE114154 | Transcribed locus | --- | 1.824 | 0.482 | 0.987 | 0.815 | 2.205 | 0.213 | 0.516 | 0.222 |
| 1397385_at   | BM387110 | Transcribed locus | --- | 1.201 | 0.482 | 0.946 | 0.074 | 1.090 | 0.713 | 0.593 | 0.025 |
| 1380253_at   | BE102139 | Transcribed locus | --- | 0.850 | 0.483 | 0.729 | 0.230 | 0.762 | 0.070 | 0.999 | 0.632 |
| 1372261_at   | AI409067 | Transcribed locus | --- | 0.908 | 0.483 | 1.272 | 0.389 | 0.699 | 0.062 | 1.106 | 0.541 |
| 1378722_at   | BF393951 | Transcribed locus | --- | 0.832 | 0.483 | 1.011 | 0.569 | 0.732 | 0.471 | 0.977 | 0.931 |
| 1394647_at   | AA819479 | Transcribed locus | --- | 1.957 | 0.484 | 1.062 | 0.316 | 1.885 | 0.086 | 1.040 | 0.380 |
| 1379548_at   | BF560252 | Transcribed locus | --- | 0.941 | 0.484 | 1.178 | 0.235 | 0.283 | 0.472 | 0.777 | 0.876 |
| 1393310_at   | BG672309 | Transcribed locus | --- | 1.169 | 0.485 | 1.028 | 0.257 | 0.814 | 0.704 | 0.515 | 0.019 |
| 1397650_at   | BF403165 | Transcribed locus | --- | 0.916 | 0.485 | 0.912 | 0.021 | 0.818 | 0.079 | 0.966 | 0.296 |
| 1386818_at   | AA848601 | Transcribed locus | --- | 0.556 | 0.486 | 0.452 | 0.014 | 0.369 | 0.035 | 0.526 | 0.010 |
| 1391291_at   | BF410101 | Transcribed locus | --- | 0.863 | 0.486 | 1.279 | 0.112 | 1.548 | 0.211 | 0.924 | 0.573 |
| 1375699_at   | BM389190 | Transcribed locus | --- | 1.241 | 0.487 | 3.033 | 0.075 | 1.292 | 0.343 | 2.338 | 0.003 |
| 1379394_at   | BF289573 | Transcribed locus | --- | 0.791 | 0.488 | 0.799 | 0.027 | 1.156 | 0.997 | 0.802 | 0.183 |
| 1393712_at   | BF419515 | Transcribed locus | --- | 0.958 | 0.488 | 0.549 | 0.013 | 0.897 | 0.104 | 0.569 | 0.025 |
| 1373220_at   | BI296489 | Transcribed locus | --- | 0.814 | 0.488 | 0.239 | 0.006 | 0.908 | 0.191 | 0.167 | 0.006 |
| 1379637_at   | BG670537 | Transcribed locus | --- | 0.807 | 0.489 | 1.605 | 0.044 | 1.060 | 0.699 | 1.153 | 0.083 |
| 1385581_at   | BF551187 | Transcribed locus | --- | 0.628 | 0.490 | 0.210 | 0.002 | 0.809 | 0.430 | 0.352 | 0.010 |
| 1375308_at   | BM383330 | Transcribed locus | --- | 0.728 | 0.492 | 1.068 | 0.862 | 1.301 | 0.950 | 1.470 | 0.785 |
| 1377723_at   | AI234810 | Transcribed locus | --- | 0.995 | 0.493 | 0.371 | 0.004 | 1.144 | 0.990 | 0.673 | 0.078 |
| 1383501_at   | AI059858 | Transcribed locus | --- | 0.873 | 0.493 | 0.608 | 0.635 | 0.789 | 0.450 | 0.863 | 0.517 |
| 1397554_at   | BE108776 | Transcribed locus | --- | 1.015 | 0.494 | 1.000 | 0.616 | 1.369 | 0.087 | 0.896 | 0.995 |
| 1376351_at   | BM383716 | Transcribed locus | --- | 0.814 | 0.494 | 0.878 | 0.960 | 0.822 | 0.281 | 0.857 | 0.280 |
| 1393360_at   | BE105636 | Transcribed locus | --- | 0.585 | 0.495 | 0.328 | 0.002 | 0.835 | 0.257 | 0.417 | 0.012 |
| 1383069_at   | AW144676 | Transcribed locus | --- | 2.001 | 0.497 | 0.844 | 0.551 | 1.371 | 0.305 | 0.806 | 0.450 |
| 1376685_at   | AW532489 | Transcribed locus | --- | 1.320 | 0.497 | 0.779 | 0.431 | 1.631 | 0.476 | 0.920 | 0.763 |
| 1379769_at   | AW529745 | Transcribed locus | --- | 1.002 | 0.498 | 1.000 | 0.934 | 0.856 | 0.096 | 1.001 | 0.941 |
| 1379433_at   | AI059449 | Transcribed locus | --- | 0.923 | 0.498 | 0.720 | 0.007 | 0.990 | 0.733 | 0.644 | 0.061 |
| 1397897_x_at | BI273954 | Transcribed locus | --- | 1.258 | 0.499 | 1.371 | 0.426 | 1.236 | 0.030 | 1.284 | 0.280 |
| 1379043_at   | BI284837 | Transcribed locus | --- | 0.851 | 0.499 | 2.385 | 0.002 | 0.713 | 0.069 | 1.541 | 0.046 |
| 1375661_at   | BE104180 | Transcribed locus | --- | 1.944 | 0.500 | 1.157 | 0.563 | 1.818 | 0.518 | 4.705 | 0.045 |
| 1384406_at   | AW527186 | Transcribed locus | --- | 1.293 | 0.500 | 0.985 | 0.503 | 1.094 | 0.377 | 1.028 | 0.515 |
| 1391976_at   | BI286417 | Transcribed locus | --- | 0.656 | 0.501 | 0.922 | 0.148 | 1.692 | 0.069 | 1.743 | 0.104 |
| 1394600_at   | AI146026 | Transcribed locus | --- | 0.688 | 0.501 | 3.268 | 0.009 | 1.084 | 0.682 | 2.052 | 0.029 |
| 1399053_at   | BM391257 | Transcribed locus | --- | 0.825 | 0.501 | 0.703 | 0.007 | 0.826 | 0.449 | 0.696 | 0.022 |
| 1391943_at   | BF393061 | Transcribed locus | --- | 0.944 | 0.501 | 0.999 | 0.974 | 0.946 | 0.440 | 1.000 | 0.997 |
| 1398594_at   | AI029767 | Transcribed locus | --- | 1.351 | 0.501 | 0.383 | 0.008 | 1.811 | 0.234 | 0.578 | 0.120 |
| 1397282_at   | AW531746 | Transcribed locus | --- | 0.935 | 0.502 | 1.002 | 0.970 | 0.935 | 0.506 | 1.031 | 0.278 |
| 1373981_at   | BI299720 | Transcribed locus | --- | 1.001 | 0.502 | 1.002 | 0.464 | 1.003 | 0.898 | 0.923 | 0.450 |
| 1385706_at   | BI292758 | Transcribed locus | --- | 0.774 | 0.502 | 0.940 | 0.716 | 0.895 | 0.552 | 0.902 | 0.455 |
| 1394733_at   | AW527528 | Transcribed locus | --- | 0.999 | 0.503 | 0.811 | 0.989 | 1.138 | 0.209 | 0.991 | 0.995 |
| 1389536_at   | BF281954 | Transcribed locus | --- | 1.805 | 0.503 | 1.028 | 0.958 | 1.289 | 0.675 | 1.292 | 0.358 |
| 1389818_at   | AA997712 | Transcribed locus | --- | 0.955 | 0.504 | 1.688 | 0.000 | 0.774 | 0.027 | 1.374 | 0.008 |
| 1385719_at   | AW531176 | Transcribed locus | --- | 1.098 | 0.504 | 1.042 | 0.857 | 0.943 | 0.685 | 1.216 | 0.152 |
| 1378087_at   | BM387164 | Transcribed locus | --- | 1.239 | 0.504 | 0.785 | 0.895 | 0.611 | 0.999 | 1.467 | 0.107 |
| 1397541_at   | BG671148 | Transcribed locus | --- | 1.130 | 0.504 | 0.853 | 0.552 | 1.956 | 0.227 | 1.307 | 0.099 |
| 1397942_at   | BF552711 | Transcribed locus | --- | 0.712 | 0.504 | 0.681 | 0.038 | 0.538 | 0.045 | 0.526 | 0.038 |
| 1394026_at   | AA875227 | Transcribed locus | --- | 0.968 | 0.504 | 1.153 | 0.540 | 0.869 | 0.738 | 1.189 | 0.264 |
| 1375343_at   | BE116572 | Transcribed locus | --- | 1.011 | 0.506 | 0.474 | 0.024 | 0.707 | 0.241 | 0.484 | 0.005 |

|            |          |                   |     |       |       |       |       |       |       |       |       |
|------------|----------|-------------------|-----|-------|-------|-------|-------|-------|-------|-------|-------|
| 1397257_at | BE108093 | Transcribed locus | --- | 1.325 | 0.506 | 1.286 | 0.979 | 1.436 | 0.292 | 1.186 | 0.582 |
| 1397371_at | AI577362 | Transcribed locus | --- | 1.348 | 0.506 | 1.007 | 0.900 | 1.850 | 0.046 | 1.001 | 0.988 |
| 1384226_at | AI602005 | Transcribed locus | --- | 0.423 | 0.507 | 0.466 | 0.020 | 0.954 | 0.921 | 0.428 | 0.157 |
| 1380078_at | AW144384 | Transcribed locus | --- | 0.833 | 0.507 | 0.374 | 0.013 | 1.280 | 0.566 | 0.380 | 0.015 |
| 1381506_at | BF417935 | Transcribed locus | --- | 1.203 | 0.507 | 1.362 | 0.147 | 0.961 | 0.709 | 1.424 | 0.345 |
| 1373525_at | AI113011 | Transcribed locus | --- | 0.867 | 0.508 | 0.818 | 0.354 | 0.767 | 0.418 | 0.845 | 0.113 |
| 1386292_at | AI639358 | Transcribed locus | --- | 0.700 | 0.509 | 2.024 | 0.848 | 1.403 | 0.329 | 3.655 | 0.175 |
| 1373511_at | BI296596 | Transcribed locus | --- | 0.753 | 0.509 | 0.249 | 0.013 | 0.610 | 0.067 | 0.237 | 0.015 |
| 1385782_at | AW524067 | Transcribed locus | --- | 0.909 | 0.511 | 1.255 | 0.451 | 1.748 | 0.219 | 0.802 | 0.227 |
| 1395422_at | BF288357 | Transcribed locus | --- | 0.843 | 0.511 | 1.209 | 0.289 | 0.917 | 0.716 | 1.086 | 0.955 |
| 1381681_at | BE110205 | Transcribed locus | --- | 1.499 | 0.511 | 1.219 | 0.416 | 2.818 | 0.194 | 1.204 | 0.489 |
| 1380121_at | BE117215 | Transcribed locus | --- | 1.031 | 0.512 | 0.975 | 0.225 | 1.104 | 0.665 | 0.794 | 0.321 |
| 1389610_at | AW520754 | Transcribed locus | --- | 0.875 | 0.512 | 0.960 | 0.930 | 0.333 | 0.003 | 0.402 | 0.072 |
| 1382978_at | AA955691 | Transcribed locus | --- | 0.653 | 0.512 | 0.971 | 0.704 | 0.618 | 0.181 | 0.975 | 0.769 |
| 1390259_at | AI231279 | Transcribed locus | --- | 0.976 | 0.512 | 1.037 | 0.132 | 0.845 | 0.528 | 0.841 | 0.766 |
| 1383139_at | BM386881 | Transcribed locus | --- | 1.387 | 0.512 | 0.426 | 0.000 | 1.641 | 0.037 | 0.906 | 0.035 |
| 1383751_at | AI555007 | Transcribed locus | --- | 1.197 | 0.513 | 3.182 | 0.005 | 1.279 | 0.113 | 2.041 | 0.036 |
| 1375773_at | BG379365 | Transcribed locus | --- | 0.787 | 0.513 | 0.446 | 0.073 | 0.734 | 0.793 | 0.541 | 0.057 |
| 1394499_at | AI501768 | Transcribed locus | --- | 1.278 | 0.513 | 1.295 | 0.004 | 1.001 | 0.821 | 1.749 | 0.000 |
| 1398693_at | BF289500 | Transcribed locus | --- | 1.034 | 0.513 | 0.748 | 0.260 | 1.200 | 0.336 | 0.689 | 0.131 |
| 1385399_at | AI071789 | Transcribed locus | --- | 1.699 | 0.514 | 0.906 | 0.365 | 1.659 | 0.064 | 0.953 | 0.749 |
| 1380376_at | BI290853 | Transcribed locus | --- | 0.952 | 0.516 | 0.474 | 0.036 | 0.943 | 0.770 | 0.604 | 0.046 |
| 1376773_at | AI406968 | Transcribed locus | --- | 1.120 | 0.517 | 0.784 | 0.048 | 1.455 | 0.088 | 0.781 | 0.601 |
| 1381144_at | AW524106 | Transcribed locus | --- | 0.679 | 0.517 | 0.709 | 0.024 | 0.669 | 0.471 | 0.377 | 0.010 |
| 1385922_at | BM385585 | Transcribed locus | --- | 1.077 | 0.517 | 0.730 | 0.366 | 1.003 | 0.991 | 0.728 | 0.368 |
| 1371675_at | AA893193 | Transcribed locus | --- | 1.022 | 0.518 | 1.346 | 0.088 | 1.397 | 0.903 | 1.492 | 0.055 |
| 1376662_at | BF390141 | Transcribed locus | --- | 1.116 | 0.518 | 0.629 | 0.010 | 1.036 | 0.714 | 0.801 | 0.043 |
| 1372669_at | BF404426 | Transcribed locus | --- | 0.959 | 0.518 | 0.287 | 0.002 | 1.692 | 0.092 | 0.478 | 0.236 |
| 1378627_at | BE120328 | Transcribed locus | --- | 0.883 | 0.519 | 1.408 | 0.764 | 0.867 | 0.565 | 1.227 | 0.425 |
| 1373937_at | AA799661 | Transcribed locus | --- | 1.057 | 0.519 | 1.221 | 0.062 | 1.711 | 0.084 | 1.127 | 0.277 |
| 1373306_at | BM386212 | Transcribed locus | --- | 1.190 | 0.520 | 0.812 | 0.454 | 0.977 | 0.295 | 1.104 | 0.262 |
| 1384916_at | AI717256 | Transcribed locus | --- | 1.219 | 0.520 | 0.981 | 0.401 | 1.143 | 0.287 | 0.983 | 0.857 |
| 1397894_at | BG381542 | Transcribed locus | --- | 0.728 | 0.521 | 0.449 | 0.029 | 1.085 | 0.715 | 1.225 | 0.591 |
| 1393207_at | BF566116 | Transcribed locus | --- | 1.159 | 0.521 | 0.998 | 0.987 | 1.000 | 0.999 | 0.999 | 0.988 |
| 1392044_at | BE117009 | Transcribed locus | --- | 0.987 | 0.522 | 0.412 | 0.020 | 1.514 | 0.116 | 0.556 | 0.076 |
| 1384107_at | AI071397 | Transcribed locus | --- | 1.700 | 0.522 | 0.879 | 0.099 | 0.787 | 0.116 | 1.153 | 0.057 |
| 1380416_at | BF284504 | Transcribed locus | --- | 0.868 | 0.522 | 0.826 | 0.061 | 0.862 | 0.131 | 1.169 | 0.039 |
| 1373184_at | BF410842 | Transcribed locus | --- | 1.292 | 0.523 | 0.973 | 0.924 | 0.998 | 0.785 | 0.999 | 0.997 |
| 1383234_at | BF405850 | Transcribed locus | --- | 1.277 | 0.523 | 0.306 | 0.000 | 1.124 | 0.775 | 0.325 | 0.001 |
| 1392424_at | BF407028 | Transcribed locus | --- | 0.718 | 0.524 | 0.849 | 0.094 | 0.624 | 0.121 | 0.751 | 0.018 |
| 1398496_at | BF390696 | Transcribed locus | --- | 0.555 | 0.524 | 0.477 | 0.006 | 0.709 | 0.941 | 0.520 | 0.007 |
| 1373879_at | AI234961 | Transcribed locus | --- | 0.633 | 0.525 | 1.420 | 0.042 | 0.465 | 0.036 | 1.293 | 0.477 |
| 1395158_at | BF391885 | Transcribed locus | --- | 1.003 | 0.526 | 0.986 | 0.119 | 1.565 | 0.212 | 0.992 | 0.724 |
| 1390427_at | BF397491 | Transcribed locus | --- | 1.008 | 0.526 | 0.531 | 0.131 | 1.300 | 0.818 | 0.532 | 0.009 |
| 1384346_at | AA964754 | Transcribed locus | --- | 1.609 | 0.527 | 0.722 | 0.064 | 1.399 | 0.460 | 0.624 | 0.007 |
| 1375601_at | BF410219 | Transcribed locus | --- | 0.946 | 0.527 | 0.634 | 0.518 | 0.681 | 0.180 | 0.602 | 0.619 |
| 1371328_at | BM986552 | Transcribed locus | --- | 0.912 | 0.527 | 1.017 | 0.799 | 0.823 | 0.487 | 0.908 | 0.077 |
| 1379031_at | BM390697 | Transcribed locus | --- | 0.726 | 0.527 | 0.832 | 0.447 | 0.929 | 0.771 | 0.895 | 0.047 |
| 1389147_at | BE116020 | Transcribed locus | --- | 0.823 | 0.528 | 1.328 | 0.009 | 0.702 | 0.009 | 1.284 | 0.010 |
| 1393582_at | AW529067 | Transcribed locus | --- | 0.968 | 0.528 | 0.800 | 0.024 | 1.000 | 0.752 | 0.743 | 0.170 |
| 1375658_at | AI412317 | Transcribed locus | --- | 1.252 | 0.529 | 1.193 | 0.453 | 1.588 | 0.023 | 1.471 | 0.167 |
| 1378204_at | AI171512 | Transcribed locus | --- | 0.927 | 0.529 | 0.911 | 0.043 | 0.999 | 0.392 | 0.712 | 0.017 |
| 1393772_at | AW523217 | Transcribed locus | --- | 1.131 | 0.530 | 0.752 | 0.029 | 0.640 | 0.522 | 0.948 | 0.628 |
| 1398491_at | BM383434 | Transcribed locus | --- | 0.884 | 0.531 | 0.489 | 0.003 | 0.720 | 0.429 | 0.316 | 0.002 |
| 1376430_at | AA925921 | Transcribed locus | --- | 1.402 | 0.531 | 1.113 | 0.985 | 1.405 | 0.846 | 1.006 | 0.908 |
| 1378506_at | BM385647 | Transcribed locus | --- | 0.529 | 0.532 | 0.568 | 0.012 | 0.586 | 0.130 | 0.553 | 0.002 |
| 1395217_at | AA899394 | Transcribed locus | --- | 1.290 | 0.532 | 1.002 | 0.702 | 1.366 | 0.216 | 0.943 | 0.704 |
| 1385106_at | BE107024 | Transcribed locus | --- | 1.121 | 0.532 | 0.562 | 0.013 | 0.976 | 0.915 | 0.701 | 0.111 |
| 1390028_at | BE096356 | Transcribed locus | --- | 1.069 | 0.533 | 1.081 | 0.283 | 0.961 | 0.717 | 1.148 | 0.159 |
| 1372314_at | AI179677 | Transcribed locus | --- | 0.950 | 0.533 | 0.571 | 0.002 | 0.933 | 0.850 | 0.770 | 0.028 |
| 1376278_at | BI282100 | Transcribed locus | --- | 0.910 | 0.533 | 0.755 | 0.086 | 1.132 | 0.058 | 0.968 | 0.583 |



|              |          |                   |     |       |       |       |       |       |       |       |       |
|--------------|----------|-------------------|-----|-------|-------|-------|-------|-------|-------|-------|-------|
| 1388522_at   | AI170820 | Transcribed locus | --- | 0.820 | 0.534 | 1.136 | 0.320 | 0.878 | 0.041 | 1.119 | 0.261 |
| 1372668_at   | BI289676 | Transcribed locus | --- | 1.030 | 0.535 | 1.098 | 0.101 | 0.798 | 0.037 | 0.707 | 0.242 |
| 1384219_at   | BF522747 | Transcribed locus | --- | 0.812 | 0.535 | 0.654 | 0.058 | 1.176 | 0.727 | 0.663 | 0.053 |
| 1375932_at   | BF284677 | Transcribed locus | --- | 0.801 | 0.535 | 0.520 | 0.021 | 0.773 | 0.823 | 0.611 | 0.024 |
| 1394049_at   | BE108839 | Transcribed locus | --- | 1.142 | 0.536 | 0.960 | 0.228 | 1.000 | 0.323 | 0.891 | 0.424 |
| 1389019_at   | AI178561 | Transcribed locus | --- | 0.858 | 0.536 | 0.443 | 0.014 | 0.787 | 0.099 | 0.685 | 0.047 |
| 1393006_at   | BF282112 | Transcribed locus | --- | 0.886 | 0.536 | 0.733 | 0.006 | 1.124 | 0.604 | 0.754 | 0.053 |
| 1391901_at   | AA956085 | Transcribed locus | --- | 0.844 | 0.537 | 0.497 | 0.012 | 0.670 | 0.819 | 0.602 | 0.029 |
| 1396406_at   | BE102611 | Transcribed locus | --- | 0.876 | 0.538 | 1.005 | 0.994 | 0.871 | 0.478 | 1.009 | 0.777 |
| 1388888_at   | BI274615 | Transcribed locus | --- | 0.755 | 0.538 | 0.728 | 0.010 | 0.648 | 0.001 | 0.690 | 0.015 |
| 1392139_at   | BE105731 | Transcribed locus | --- | 0.873 | 0.538 | 0.995 | 0.213 | 0.876 | 0.611 | 1.002 | 0.093 |
| 1386540_at   | BG666051 | Transcribed locus | --- | 1.330 | 0.539 | 1.110 | 0.118 | 2.635 | 0.735 | 1.603 | 0.006 |
| 1378381_x_at | BF552442 | Transcribed locus | --- | 1.531 | 0.539 | 1.161 | 0.832 | 1.134 | 0.179 | 0.787 | 0.405 |
| 1392189_at   | BE105136 | Transcribed locus | --- | 0.999 | 0.540 | 1.197 | 0.076 | 0.593 | 0.022 | 1.212 | 0.935 |
| 1376782_at   | AW915083 | Transcribed locus | --- | 0.483 | 0.541 | 0.717 | 0.153 | 0.178 | 0.039 | 0.709 | 0.032 |
| 1383331_at   | BF548234 | Transcribed locus | --- | 1.274 | 0.541 | 1.051 | 0.548 | 1.506 | 0.283 | 1.167 | 0.478 |
| 1395578_at   | BF419340 | Transcribed locus | --- | 0.746 | 0.542 | 1.522 | 0.199 | 1.215 | 0.716 | 1.803 | 0.002 |
| 1378685_at   | AI235586 | Transcribed locus | --- | 0.935 | 0.544 | 0.630 | 0.108 | 1.049 | 0.126 | 0.738 | 0.114 |
| 1389800_at   | BF420629 | Transcribed locus | --- | 1.048 | 0.544 | 1.120 | 0.383 | 1.049 | 0.989 | 1.004 | 0.812 |
| 1378084_at   | BF396266 | Transcribed locus | --- | 0.978 | 0.545 | 0.642 | 0.020 | 0.953 | 0.827 | 0.585 | 0.001 |
| 1372727_at   | BM384088 | Transcribed locus | --- | 0.567 | 0.546 | 0.389 | 0.118 | 1.959 | 0.264 | 0.139 | 0.024 |
| 1399025_at   | AW916140 | Transcribed locus | --- | 1.004 | 0.546 | 0.958 | 0.410 | 1.083 | 0.633 | 1.021 | 0.960 |
| 1373766_at   | BF405110 | Transcribed locus | --- | 0.608 | 0.547 | 1.158 | 0.222 | 0.674 | 0.331 | 1.012 | 0.769 |
| 1379828_at   | AI113302 | Transcribed locus | --- | 1.002 | 0.547 | 0.993 | 0.953 | 1.309 | 0.184 | 1.000 | 0.957 |
| 1385935_at   | AI577552 | Transcribed locus | --- | 1.234 | 0.548 | 0.701 | 0.101 | 1.279 | 0.128 | 0.602 | 0.086 |
| 1381060_at   | AI113313 | Transcribed locus | --- | 2.446 | 0.548 | 0.872 | 0.952 | 1.043 | 0.784 | 0.891 | 0.848 |
| 1391523_at   | AA955605 | Transcribed locus | --- | 0.999 | 0.550 | 1.285 | 0.185 | 1.245 | 0.767 | 0.900 | 0.098 |
| 1382655_at   | AA964534 | Transcribed locus | --- | 1.029 | 0.551 | 1.153 | 0.048 | 0.906 | 0.125 | 1.867 | 0.053 |
| 1397278_at   | BE113877 | Transcribed locus | --- | 1.044 | 0.552 | 1.186 | 0.934 | 1.148 | 0.595 | 0.717 | 0.081 |
| 1392796_at   | AI231609 | Transcribed locus | --- | 1.233 | 0.553 | 0.726 | 0.091 | 1.461 | 0.013 | 1.083 | 0.272 |
| 1373645_at   | BM386246 | Transcribed locus | --- | 0.975 | 0.553 | 1.002 | 0.972 | 1.103 | 0.134 | 1.007 | 0.923 |
| 1379074_at   | BE329032 | Transcribed locus | --- | 1.030 | 0.554 | 1.200 | 0.159 | 0.724 | 0.118 | 1.223 | 0.034 |
| 1371901_at   | AI176646 | Transcribed locus | --- | 1.124 | 0.554 | 0.813 | 0.013 | 1.092 | 0.583 | 0.793 | 0.070 |
| 1381131_at   | AI171441 | Transcribed locus | --- | 1.644 | 0.555 | 0.922 | 0.361 | 1.579 | 0.881 | 0.990 | 0.322 |
| 1373261_at   | BF388657 | Transcribed locus | --- | 1.320 | 0.555 | 0.561 | 0.056 | 1.674 | 0.061 | 0.719 | 0.471 |
| 1382692_at   | AI045955 | Transcribed locus | --- | 0.987 | 0.556 | 1.003 | 0.992 | 1.596 | 0.307 | 1.284 | 0.382 |
| 1380124_at   | BF388563 | Transcribed locus | --- | 1.098 | 0.556 | 0.863 | 0.981 | 0.872 | 0.176 | 0.690 | 0.514 |
| 1374758_at   | BM387112 | Transcribed locus | --- | 0.646 | 0.556 | 0.322 | 0.000 | 0.521 | 0.018 | 0.385 | 0.002 |
| 1372805_at   | BE328984 | Transcribed locus | --- | 1.194 | 0.557 | 0.629 | 0.058 | 0.847 | 0.968 | 0.746 | 0.278 |
| 1392127_at   | BF400081 | Transcribed locus | --- | 0.897 | 0.557 | 1.703 | 0.387 | 1.329 | 0.967 | 1.292 | 0.301 |
| 1372544_at   | AI410305 | Transcribed locus | --- | 0.919 | 0.558 | 0.468 | 0.002 | 1.013 | 0.260 | 0.436 | 0.013 |
| 1376933_at   | AI170377 | Transcribed locus | --- | 0.857 | 0.558 | 0.741 | 0.176 | 0.570 | 0.451 | 0.438 | 0.032 |
| 1376385_at   | BF400806 | Transcribed locus | --- | 0.724 | 0.558 | 0.957 | 0.240 | 1.010 | 0.948 | 0.780 | 0.466 |
| 1383408_at   | BI276349 | Transcribed locus | --- | 1.198 | 0.559 | 1.029 | 0.796 | 0.783 | 0.005 | 1.115 | 0.472 |
| 1391039_at   | BE115243 | Transcribed locus | --- | 0.999 | 0.560 | 0.806 | 0.030 | 0.997 | 0.752 | 1.222 | 0.252 |
| 1393355_at   | AI111659 | Transcribed locus | --- | 1.463 | 0.561 | 3.789 | 0.157 | 1.027 | 0.494 | 1.667 | 0.107 |
| 1381210_at   | AI639521 | Transcribed locus | --- | 0.944 | 0.562 | 0.870 | 0.312 | 0.890 | 0.651 | 1.139 | 0.678 |
| 1372681_at   | BI294716 | Transcribed locus | --- | 1.041 | 0.563 | 0.774 | 0.735 | 1.480 | 0.022 | 0.755 | 0.304 |
| 1374587_at   | AI009750 | Transcribed locus | --- | 0.539 | 0.564 | 0.766 | 0.276 | 1.258 | 0.535 | 0.644 | 0.033 |
| 1384422_at   | AI045140 | Transcribed locus | --- | 0.514 | 0.564 | 0.095 | 0.000 | 0.508 | 0.019 | 0.077 | 0.020 |
| 1393916_at   | AI044713 | Transcribed locus | --- | 1.040 | 0.564 | 0.848 | 0.079 | 1.216 | 0.797 | 1.074 | 0.667 |
| 1391600_at   | BE118049 | Transcribed locus | --- | 1.031 | 0.564 | 0.778 | 0.144 | 1.481 | 0.031 | 0.897 | 0.007 |
| 1383935_at   | AW252428 | Transcribed locus | --- | 1.033 | 0.564 | 0.941 | 0.772 | 1.625 | 0.128 | 1.351 | 0.645 |
| 1391492_at   | AI103493 | Transcribed locus | --- | 0.998 | 0.565 | 1.216 | 0.501 | 0.942 | 0.457 | 1.028 | 0.235 |
| 1390561_at   | BF282191 | Transcribed locus | --- | 1.127 | 0.565 | 0.283 | 0.000 | 2.088 | 0.160 | 0.542 | 0.007 |
| 1380677_at   | BF401719 | Transcribed locus | --- | 1.292 | 0.566 | 0.848 | 0.046 | 1.214 | 0.604 | 0.872 | 0.719 |
| 1383167_at   | BM392101 | Transcribed locus | --- | 0.574 | 0.567 | 0.681 | 0.006 | 0.545 | 0.061 | 0.813 | 0.008 |
| 1373313_at   | BM391570 | Transcribed locus | --- | 0.781 | 0.568 | 0.968 | 0.539 | 1.059 | 0.311 | 1.043 | 0.724 |
| 1385246_at   | AI717564 | Transcribed locus | --- | 1.698 | 0.568 | 0.901 | 0.410 | 1.339 | 0.117 | 0.766 | 0.499 |
| 1385087_at   | BF406606 | Transcribed locus | --- | 0.988 | 0.568 | 0.554 | 0.009 | 0.707 | 0.190 | 0.519 | 0.017 |
| 1382215_at   | AA875331 | Transcribed locus | --- | 1.250 | 0.569 | 2.229 | 0.005 | 1.773 | 0.128 | 2.120 | 0.047 |

|              |          |                   |     |       |       |       |       |       |       |       |       |
|--------------|----------|-------------------|-----|-------|-------|-------|-------|-------|-------|-------|-------|
| 1374027_at   | AI071243 | Transcribed locus | --- | 0.951 | 0.569 | 1.303 | 0.017 | 1.173 | 0.343 | 1.216 | 0.094 |
| 1374888_at   | AI317837 | Transcribed locus | --- | 2.281 | 0.570 | 1.676 | 0.053 | 1.533 | 0.442 | 1.439 | 0.010 |
| 1389138_at   | AA945574 | Transcribed locus | --- | 0.853 | 0.571 | 0.902 | 0.249 | 0.791 | 0.031 | 0.913 | 0.039 |
| 1381538_at   | BF391531 | Transcribed locus | --- | 1.052 | 0.573 | 1.226 | 0.392 | 1.474 | 0.217 | 1.694 | 0.219 |
| 1385003_at   | BE099045 | Transcribed locus | --- | 1.328 | 0.575 | 0.708 | 0.008 | 0.829 | 0.713 | 0.726 | 0.035 |
| 1377836_at   | AI638997 | Transcribed locus | --- | 1.299 | 0.577 | 1.312 | 0.083 | 1.543 | 0.542 | 1.361 | 0.049 |
| 1382540_at   | BI296328 | Transcribed locus | --- | 0.918 | 0.577 | 0.754 | 0.089 | 0.866 | 0.148 | 0.553 | 0.034 |
| 1373183_at   | AI229780 | Transcribed locus | --- | 0.682 | 0.578 | 0.626 | 0.030 | 0.852 | 0.217 | 0.638 | 0.078 |
| 1376891_at   | AA818282 | Transcribed locus | --- | 0.784 | 0.579 | 0.213 | 0.009 | 0.733 | 0.297 | 0.288 | 0.010 |
| 1395174_at   | BI289214 | Transcribed locus | --- | 1.109 | 0.579 | 0.325 | 0.011 | 1.278 | 0.352 | 0.354 | 0.035 |
| 1396062_at   | BF290729 | Transcribed locus | --- | 0.784 | 0.579 | 0.596 | 0.112 | 1.291 | 0.435 | 0.544 | 0.083 |
| 1385652_at   | AI549246 | Transcribed locus | --- | 1.375 | 0.580 | 1.858 | 0.025 | 1.004 | 0.601 | 1.450 | 0.173 |
| 1378167_at   | AI599898 | Transcribed locus | --- | 1.129 | 0.580 | 1.097 | 0.796 | 1.001 | 0.969 | 1.017 | 0.921 |
| 1396760_at   | BF405512 | Transcribed locus | --- | 0.756 | 0.580 | 1.000 | 0.296 | 0.846 | 0.045 | 0.927 | 0.753 |
| 1383816_at   | BI285419 | Transcribed locus | --- | 1.011 | 0.581 | 0.724 | 0.044 | 0.944 | 0.713 | 0.588 | 0.056 |
| 1385697_at   | BI302799 | Transcribed locus | --- | 0.973 | 0.581 | 0.661 | 0.039 | 1.052 | 0.236 | 0.777 | 0.198 |
| 1375237_at   | BF404538 | Transcribed locus | --- | 0.825 | 0.581 | 0.786 | 0.032 | 1.012 | 0.372 | 0.759 | 0.057 |
| 1376600_at   | BI289616 | Transcribed locus | --- | 0.969 | 0.582 | 0.555 | 0.013 | 0.853 | 0.048 | 0.735 | 0.028 |
| 1385879_at   | AA893004 | Transcribed locus | --- | 0.814 | 0.582 | 6.279 | 0.024 | 1.588 | 0.958 | 2.399 | 0.009 |
| 1381848_at   | AI228486 | Transcribed locus | --- | 0.909 | 0.583 | 1.412 | 0.663 | 1.220 | 0.166 | 1.347 | 0.547 |
| 1377130_at   | AW526352 | Transcribed locus | --- | 1.128 | 0.584 | 1.047 | 0.612 | 1.323 | 0.618 | 1.151 | 0.207 |
| 1383487_at   | AW530484 | Transcribed locus | --- | 0.904 | 0.584 | 0.666 | 0.004 | 0.776 | 0.190 | 0.541 | 0.004 |
| 1383854_at   | AI715145 | Transcribed locus | --- | 1.005 | 0.586 | 1.261 | 0.545 | 1.015 | 0.963 | 0.935 | 0.758 |
| 1378717_at   | BF390952 | Transcribed locus | --- | 1.100 | 0.586 | 0.999 | 0.994 | 0.992 | 0.888 | 1.000 | 0.962 |
| 1373019_at   | AI172468 | Transcribed locus | --- | 0.562 | 0.586 | 0.526 | 0.010 | 0.897 | 0.220 | 0.799 | 0.094 |
| 1378097_at   | AI599593 | Transcribed locus | --- | 1.130 | 0.586 | 0.286 | 0.036 | 3.115 | 0.009 | 0.657 | 0.263 |
| 1372641_at   | AW434261 | Transcribed locus | --- | 1.135 | 0.587 | 1.238 | 0.388 | 1.290 | 0.969 | 1.702 | 0.127 |
| 1395901_at   | AW532049 | Transcribed locus | --- | 0.803 | 0.587 | 0.948 | 0.288 | 0.836 | 0.010 | 0.898 | 0.447 |
| 1390684_at   | AA892642 | Transcribed locus | --- | 0.898 | 0.587 | 0.788 | 0.087 | 1.014 | 0.249 | 0.957 | 0.811 |
| 1379612_at   | BI276164 | Transcribed locus | --- | 1.184 | 0.588 | 1.188 | 0.322 | 1.005 | 0.763 | 0.996 | 0.958 |
| 1379807_at   | BE109195 | Transcribed locus | --- | 1.098 | 0.589 | 1.857 | 0.071 | 0.688 | 0.106 | 1.217 | 0.288 |
| 1380860_at   | AA819536 | Transcribed locus | --- | 1.020 | 0.589 | 0.467 | 0.015 | 1.240 | 0.949 | 0.635 | 0.014 |
| 1371666_at   | BM385852 | Transcribed locus | --- | 1.052 | 0.589 | 1.655 | 0.004 | 0.903 | 0.285 | 1.658 | 0.004 |
| 1381011_at   | BF402331 | Transcribed locus | --- | 0.961 | 0.590 | 0.587 | 0.197 | 0.996 | 0.799 | 0.640 | 0.255 |
| 1373513_at   | AI012419 | Transcribed locus | --- | 1.205 | 0.590 | 0.553 | 0.000 | 1.063 | 0.815 | 0.608 | 0.048 |
| 1378021_at   | AI102035 | Transcribed locus | --- | 1.061 | 0.591 | 1.561 | 0.027 | 0.919 | 0.773 | 1.166 | 0.236 |
| 1383530_at   | AA925994 | Transcribed locus | --- | 0.857 | 0.591 | 2.090 | 0.002 | 0.647 | 0.029 | 1.868 | 0.002 |
| 1383747_at   | AI578135 | Transcribed locus | --- | 1.308 | 0.591 | 0.477 | 0.043 | 0.650 | 0.168 | 0.494 | 0.011 |
| 1396028_at   | BF392616 | Transcribed locus | --- | 1.126 | 0.591 | 0.766 | 0.052 | 1.237 | 0.780 | 0.851 | 0.038 |
| 1377222_at   | BF400700 | Transcribed locus | --- | 1.060 | 0.591 | 1.144 | 0.762 | 0.985 | 0.325 | 0.710 | 0.254 |
| 1379912_at   | BM392147 | Transcribed locus | --- | 0.972 | 0.594 | 0.584 | 0.007 | 1.186 | 0.048 | 0.621 | 0.066 |
| 1374054_at   | BE118605 | Transcribed locus | --- | 0.647 | 0.594 | 0.692 | 0.086 | 0.726 | 0.182 | 0.864 | 0.044 |
| 1378559_at   | BF400658 | Transcribed locus | --- | 0.791 | 0.595 | 1.117 | 0.185 | 1.391 | 0.212 | 1.187 | 0.173 |
| 1391649_a_at | AW915522 | Transcribed locus | --- | 1.058 | 0.595 | 1.028 | 0.821 | 0.456 | 0.049 | 1.052 | 0.968 |
| 1377862_at   | BI274618 | Transcribed locus | --- | 1.212 | 0.595 | 0.688 | 0.840 | 0.890 | 0.857 | 0.774 | 0.248 |
| 1392155_at   | AW523955 | Transcribed locus | --- | 1.286 | 0.596 | 1.511 | 0.769 | 1.277 | 0.319 | 1.245 | 0.784 |
| 1392840_at   | AI764605 | Transcribed locus | --- | 0.656 | 0.597 | 2.828 | 0.649 | 1.799 | 0.014 | 2.390 | 0.363 |
| 1384542_at   | BE103021 | Transcribed locus | --- | 1.802 | 0.598 | 0.778 | 0.220 | 1.500 | 0.611 | 0.526 | 0.099 |
| 1382226_at   | AI502443 | Transcribed locus | --- | 1.343 | 0.598 | 1.067 | 0.813 | 1.022 | 0.887 | 1.144 | 0.395 |
| 1378183_at   | AW531387 | Transcribed locus | --- | 1.094 | 0.600 | 1.147 | 0.177 | 0.713 | 0.011 | 0.667 | 0.119 |
| 1373092_at   | BE109587 | Transcribed locus | --- | 1.185 | 0.600 | 0.411 | 0.100 | 0.749 | 0.574 | 0.663 | 0.267 |
| 1391023_at   | AI548713 | Transcribed locus | --- | 1.388 | 0.601 | 1.327 | 0.308 | 0.948 | 0.731 | 1.294 | 0.330 |
| 1397724_at   | BF412617 | Transcribed locus | --- | 1.117 | 0.601 | 1.260 | 0.107 | 1.005 | 0.961 | 0.993 | 0.009 |
| 1390436_at   | BI300794 | Transcribed locus | --- | 0.950 | 0.602 | 0.980 | 0.549 | 0.466 | 0.180 | 0.965 | 0.845 |
| 1395052_at   | BE118917 | Transcribed locus | --- | 1.136 | 0.602 | 0.440 | 0.024 | 0.759 | 0.093 | 0.492 | 0.113 |
| 1397574_at   | BF563598 | Transcribed locus | --- | 0.913 | 0.602 | 0.997 | 0.977 | 1.277 | 0.301 | 0.925 | 0.992 |
| 1383330_at   | AW915049 | Transcribed locus | --- | 0.901 | 0.603 | 1.698 | 0.768 | 0.817 | 0.410 | 2.569 | 0.703 |
| 1395306_at   | AI502736 | Transcribed locus | --- | 0.878 | 0.604 | 0.611 | 0.029 | 0.858 | 0.274 | 0.720 | 0.050 |
| 1390425_at   | BF398716 | Transcribed locus | --- | 1.082 | 0.604 | 0.924 | 0.755 | 0.670 | 0.088 | 0.990 | 0.653 |
| 1384030_at   | AI030261 | Transcribed locus | --- | 0.589 | 0.605 | 1.491 | 0.311 | 0.925 | 0.715 | 0.912 | 0.252 |
| 1393093_at   | BF522164 | Transcribed locus | --- | 0.905 | 0.605 | 0.878 | 0.268 | 0.557 | 0.151 | 0.988 | 0.442 |

|            |          |                   |     |       |       |       |       |       |       |       |       |
|------------|----------|-------------------|-----|-------|-------|-------|-------|-------|-------|-------|-------|
| 1377574_at | BF392065 | Transcribed locus | --- | 1.004 | 0.605 | 1.003 | 0.827 | 0.791 | 0.557 | 1.000 | 0.754 |
| 1398003_at | BF400768 | Transcribed locus | --- | 0.855 | 0.605 | 0.978 | 0.391 | 0.676 | 0.166 | 1.126 | 0.714 |
| 1379522_at | AA956480 | Transcribed locus | --- | 1.212 | 0.606 | 1.097 | 0.588 | 2.443 | 0.051 | 1.000 | 0.998 |
| 1389552_at | BG371715 | Transcribed locus | --- | 0.749 | 0.606 | 0.658 | 0.061 | 0.568 | 0.015 | 0.665 | 0.114 |
| 1390215_at | AI235499 | Transcribed locus | --- | 0.946 | 0.606 | 0.461 | 0.006 | 0.859 | 0.214 | 0.577 | 0.000 |
| 1390387_at | BF396636 | Transcribed locus | --- | 1.135 | 0.606 | 1.063 | 0.562 | 0.951 | 0.671 | 1.529 | 0.023 |
| 1381027_at | BF393571 | Transcribed locus | --- | 0.658 | 0.607 | 0.694 | 0.058 | 0.566 | 0.067 | 0.930 | 0.190 |
| 1373568_at | AI172222 | Transcribed locus | --- | 1.175 | 0.607 | 1.242 | 0.140 | 1.137 | 0.299 | 1.309 | 0.069 |
| 1383552_at | AI071698 | Transcribed locus | --- | 1.008 | 0.607 | 0.410 | 0.028 | 0.999 | 0.938 | 0.407 | 0.028 |
| 1395010_at | AI102173 | Transcribed locus | --- | 1.030 | 0.608 | 0.668 | 0.085 | 0.994 | 0.848 | 0.673 | 0.072 |
| 1390385_at | AA964674 | Transcribed locus | --- | 1.227 | 0.608 | 1.758 | 0.018 | 1.281 | 0.757 | 1.703 | 0.027 |
| 1383352_at | AI029580 | Transcribed locus | --- | 1.082 | 0.609 | 0.727 | 0.178 | 0.913 | 0.506 | 0.864 | 0.574 |
| 1390171_at | AA924717 | Transcribed locus | --- | 0.939 | 0.609 | 1.215 | 0.093 | 0.896 | 0.653 | 1.600 | 0.007 |
| 1376277_at | AI412413 | Transcribed locus | --- | 0.686 | 0.611 | 0.958 | 0.814 | 0.457 | 0.032 | 0.826 | 0.935 |
| 1399017_at | AI234040 | Transcribed locus | --- | 0.916 | 0.611 | 0.718 | 0.039 | 0.886 | 0.258 | 0.779 | 0.055 |
| 1393526_at | AA900633 | Transcribed locus | --- | 0.782 | 0.612 | 0.676 | 0.197 | 1.689 | 0.077 | 0.746 | 0.221 |
| 1375448_at | BM391628 | Transcribed locus | --- | 0.999 | 0.612 | 0.929 | 0.596 | 1.002 | 0.290 | 0.935 | 0.308 |
| 1385486_at | AW534737 | Transcribed locus | --- | 1.313 | 0.613 | 0.562 | 0.183 | 1.141 | 0.689 | 1.565 | 0.183 |
| 1389226_at | BI295219 | Transcribed locus | --- | 0.733 | 0.613 | 0.438 | 0.031 | 0.520 | 0.087 | 0.662 | 0.068 |
| 1394856_at | BM383417 | Transcribed locus | --- | 1.316 | 0.614 | 1.187 | 0.487 | 1.318 | 0.691 | 0.963 | 0.599 |
| 1385505_at | AI072068 | Transcribed locus | --- | 1.660 | 0.614 | 0.831 | 0.569 | 1.158 | 0.694 | 1.122 | 0.196 |
| 1372163_at | BG670246 | Transcribed locus | --- | 0.981 | 0.614 | 0.127 | 0.010 | 1.404 | 0.047 | 0.354 | 0.049 |
| 1380251_at | BM386280 | Transcribed locus | --- | 0.835 | 0.616 | 0.849 | 0.096 | 0.822 | 0.572 | 0.820 | 0.019 |
| 1397073_at | BE117296 | Transcribed locus | --- | 0.873 | 0.616 | 1.506 | 0.406 | 0.837 | 0.667 | 1.358 | 0.670 |
| 1376989_at | BE099568 | Transcribed locus | --- | 0.883 | 0.617 | 0.142 | 0.009 | 1.235 | 0.294 | 0.339 | 0.097 |
| 1382583_at | AA899919 | Transcribed locus | --- | 0.874 | 0.617 | 1.213 | 0.628 | 0.425 | 0.813 | 1.309 | 0.336 |
| 1382938_at | BF386757 | Transcribed locus | --- | 0.737 | 0.617 | 1.259 | 0.531 | 1.070 | 0.185 | 1.887 | 0.962 |
| 1379513_at | BE108949 | Transcribed locus | --- | 2.305 | 0.618 | 0.594 | 0.025 | 2.359 | 0.136 | 0.640 | 0.310 |
| 1390433_at | AI102429 | Transcribed locus | --- | 1.412 | 0.619 | 1.274 | 0.003 | 1.152 | 0.273 | 1.117 | 0.184 |
| 1383278_at | BF558819 | Transcribed locus | --- | 1.160 | 0.620 | 2.949 | 0.004 | 1.025 | 0.367 | 3.056 | 0.001 |
| 1391967_at | BM389832 | Transcribed locus | --- | 0.964 | 0.620 | 1.193 | 0.362 | 1.660 | 0.449 | 1.048 | 0.687 |
| 1390695_at | BM385951 | Transcribed locus | --- | 1.027 | 0.621 | 0.392 | 0.008 | 1.035 | 0.703 | 0.676 | 0.091 |
| 1383835_at | BI303704 | Transcribed locus | --- | 1.148 | 0.622 | 1.099 | 0.268 | 1.485 | 0.080 | 1.094 | 0.656 |
| 1395302_at | BE104435 | Transcribed locus | --- | 1.269 | 0.622 | 0.963 | 0.274 | 1.582 | 0.088 | 0.866 | 0.766 |
| 1391218_at | BI294343 | Transcribed locus | --- | 0.805 | 0.623 | 0.532 | 0.001 | 0.762 | 0.184 | 0.441 | 0.026 |
| 1385393_at | BE099283 | Transcribed locus | --- | 1.088 | 0.623 | 2.368 | 0.014 | 0.822 | 0.609 | 1.438 | 0.293 |
| 1378858_at | BF400182 | Transcribed locus | --- | 1.085 | 0.623 | 2.432 | 0.034 | 1.839 | 0.370 | 1.483 | 0.553 |
| 1377588_at | BI300335 | Transcribed locus | --- | 0.881 | 0.624 | 0.990 | 0.165 | 0.980 | 0.113 | 0.977 | 0.437 |
| 1379980_at | BM386302 | Transcribed locus | --- | 0.708 | 0.624 | 1.127 | 0.432 | 1.131 | 0.701 | 1.203 | 0.523 |
| 1386051_at | H31285   | Transcribed locus | --- | 0.791 | 0.624 | 0.955 | 0.690 | 0.939 | 0.246 | 1.036 | 0.892 |
| 1371606_at | AA819633 | Transcribed locus | --- | 1.063 | 0.626 | 0.580 | 0.014 | 0.936 | 0.903 | 0.693 | 0.139 |
| 1388944_at | BE109016 | Transcribed locus | --- | 1.275 | 0.626 | 1.519 | 0.661 | 1.049 | 0.443 | 1.175 | 0.339 |
| 1372777_at | BM385774 | Transcribed locus | --- | 0.832 | 0.627 | 1.497 | 0.038 | 1.085 | 0.119 | 1.122 | 0.583 |
| 1396045_at | BI299536 | Transcribed locus | --- | 0.728 | 0.628 | 0.527 | 0.101 | 1.005 | 0.982 | 0.878 | 0.265 |
| 1379585_at | AA946230 | Transcribed locus | --- | 0.909 | 0.628 | 0.989 | 0.717 | 0.907 | 0.631 | 0.922 | 0.709 |
| 1397128_at | BF392437 | Transcribed locus | --- | 1.245 | 0.629 | 1.068 | 0.692 | 1.677 | 0.129 | 1.217 | 0.910 |
| 1376204_at | AW531412 | Transcribed locus | --- | 1.936 | 0.629 | 0.477 | 0.012 | 1.085 | 0.649 | 0.650 | 0.090 |
| 1395815_at | BF291198 | Transcribed locus | --- | 1.407 | 0.629 | 0.898 | 0.723 | 1.216 | 0.553 | 0.956 | 0.191 |
| 1377330_at | BF411114 | Transcribed locus | --- | 1.438 | 0.629 | 0.926 | 0.735 | 1.659 | 0.451 | 0.753 | 0.253 |
| 1391676_at | AI511097 | Transcribed locus | --- | 1.151 | 0.630 | 0.641 | 0.007 | 2.046 | 0.111 | 0.901 | 0.071 |
| 1385043_at | AA924649 | Transcribed locus | --- | 0.883 | 0.631 | 0.727 | 0.018 | 1.097 | 0.460 | 0.857 | 0.114 |
| 1396529_at | BF415512 | Transcribed locus | --- | 0.925 | 0.632 | 0.695 | 0.024 | 1.179 | 0.223 | 0.771 | 0.316 |
| 1389225_at | BI296570 | Transcribed locus | --- | 0.860 | 0.632 | 0.983 | 0.963 | 1.067 | 0.391 | 0.857 | 0.166 |
| 1376651_at | AW528774 | Transcribed locus | --- | 0.717 | 0.632 | 0.724 | 0.010 | 0.688 | 0.047 | 0.777 | 0.005 |
| 1386220_at | AA892761 | Transcribed locus | --- | 0.979 | 0.633 | 1.014 | 0.721 | 0.918 | 0.158 | 1.000 | 0.666 |
| 1383130_at | BF555795 | Transcribed locus | --- | 1.149 | 0.634 | 0.621 | 0.194 | 1.587 | 0.104 | 1.086 | 0.236 |
| 1394836_at | AI535155 | Transcribed locus | --- | 0.950 | 0.634 | 0.995 | 0.932 | 0.988 | 0.941 | 0.868 | 0.854 |
| 1379414_at | AA997596 | Transcribed locus | --- | 0.857 | 0.634 | 0.502 | 0.046 | 0.790 | 0.626 | 0.890 | 0.472 |
| 1367528_at | BE103273 | Transcribed locus | --- | 0.631 | 0.634 | 1.409 | 0.071 | 0.819 | 0.181 | 0.907 | 0.260 |
| 1375532_at | AI008792 | Transcribed locus | --- | 1.508 | 0.635 | 1.222 | 0.571 | 1.932 | 0.382 | 1.001 | 0.999 |
| 1393409_at | AW143298 | Transcribed locus | --- | 1.128 | 0.635 | 0.812 | 0.324 | 0.851 | 0.484 | 0.747 | 0.204 |

|            |          |                   |     |       |       |       |       |       |       |       |       |
|------------|----------|-------------------|-----|-------|-------|-------|-------|-------|-------|-------|-------|
| 1391331_at | BE106891 | Transcribed locus | --- | 0.822 | 0.636 | 0.424 | 0.003 | 0.831 | 0.366 | 0.561 | 0.001 |
| 1390489_at | BE108860 | Transcribed locus | --- | 0.899 | 0.636 | 1.246 | 0.246 | 0.935 | 0.948 | 1.516 | 0.013 |
| 1398509_at | AI170370 | Transcribed locus | --- | 1.171 | 0.639 | 1.090 | 0.600 | 1.540 | 0.977 | 1.169 | 0.530 |
| 1389050_at | AI170797 | Transcribed locus | --- | 0.925 | 0.639 | 1.129 | 0.776 | 0.611 | 0.058 | 0.688 | 0.034 |
| 1389563_at | BF406562 | Transcribed locus | --- | 0.832 | 0.639 | 1.091 | 0.074 | 0.794 | 0.049 | 1.249 | 0.012 |
| 1384006_at | AI045457 | Transcribed locus | --- | 0.792 | 0.639 | 1.575 | 0.351 | 0.310 | 0.016 | 1.008 | 0.355 |
| 1384120_at | BF386877 | Transcribed locus | --- | 1.428 | 0.640 | 0.936 | 0.406 | 1.123 | 0.965 | 0.895 | 0.777 |
| 1374663_at | AW526756 | Transcribed locus | --- | 0.901 | 0.641 | 0.806 | 0.232 | 0.464 | 0.132 | 0.691 | 0.033 |
| 1383548_at | BI290887 | Transcribed locus | --- | 0.871 | 0.641 | 1.333 | 0.044 | 1.199 | 0.498 | 1.536 | 0.059 |
| 1376095_at | BF401491 | Transcribed locus | --- | 0.911 | 0.641 | 1.077 | 0.738 | 1.001 | 0.993 | 1.003 | 0.070 |
| 1386466_at | H33093   | Transcribed locus | --- | 1.126 | 0.641 | 1.096 | 0.612 | 0.999 | 0.746 | 0.771 | 0.190 |
| 1392792_at | AI071152 | Transcribed locus | --- | 1.555 | 0.642 | 0.615 | 0.012 | 1.207 | 0.962 | 0.495 | 0.003 |
| 1374591_at | AI409042 | Transcribed locus | --- | 1.263 | 0.642 | 0.737 | 0.109 | 1.806 | 0.477 | 0.559 | 0.204 |
| 1374203_at | BM385279 | Transcribed locus | --- | 1.240 | 0.642 | 1.357 | 0.155 | 0.961 | 0.766 | 1.286 | 0.241 |
| 1398028_at | BF399371 | Transcribed locus | --- | 1.134 | 0.642 | 1.046 | 0.968 | 1.059 | 0.296 | 1.000 | 0.900 |
| 1383998_at | BF545601 | Transcribed locus | --- | 0.911 | 0.643 | 1.835 | 0.000 | 0.851 | 0.388 | 1.575 | 0.003 |
| 1392851_at | AI146048 | Transcribed locus | --- | 0.992 | 0.643 | 1.277 | 0.740 | 1.929 | 0.024 | 0.744 | 0.107 |
| 1379720_at | AW528715 | Transcribed locus | --- | 1.018 | 0.644 | 0.886 | 0.407 | 0.845 | 0.164 | 0.847 | 0.456 |
| 1372576_at | AI232347 | Transcribed locus | --- | 1.066 | 0.645 | 1.452 | 0.003 | 0.821 | 0.886 | 1.264 | 0.015 |
| 1393327_at | BG667328 | Transcribed locus | --- | 1.301 | 0.647 | 0.648 | 0.101 | 1.353 | 0.813 | 0.796 | 0.053 |
| 1396430_at | BF410086 | Transcribed locus | --- | 1.199 | 0.647 | 0.995 | 0.933 | 1.004 | 0.898 | 1.005 | 0.901 |
| 1376282_at | BM392087 | Transcribed locus | --- | 0.875 | 0.647 | 0.973 | 0.734 | 0.870 | 0.644 | 0.966 | 0.655 |
| 1397624_at | BI300158 | Transcribed locus | --- | 1.070 | 0.648 | 1.241 | 0.162 | 1.028 | 0.789 | 1.312 | 0.002 |
| 1383111_at | AI058895 | Transcribed locus | --- | 1.003 | 0.650 | 0.712 | 0.328 | 0.988 | 0.518 | 0.711 | 0.327 |
| 1380811_at | BE105756 | Transcribed locus | --- | 0.838 | 0.650 | 0.491 | 0.000 | 0.616 | 0.004 | 0.849 | 0.018 |
| 1373057_at | AI229142 | Transcribed locus | --- | 0.924 | 0.650 | 1.165 | 0.170 | 0.859 | 0.633 | 0.785 | 0.049 |
| 1391447_at | BI299229 | Transcribed locus | --- | 0.853 | 0.651 | 0.687 | 0.252 | 1.452 | 0.007 | 0.586 | 0.052 |
| 1391899_at | BI303858 | Transcribed locus | --- | 1.233 | 0.652 | 0.782 | 0.115 | 0.948 | 0.135 | 0.764 | 0.033 |
| 1380584_at | BE109190 | Transcribed locus | --- | 0.874 | 0.652 | 1.106 | 0.922 | 0.955 | 0.152 | 1.099 | 0.978 |
| 1390960_at | AA893602 | Transcribed locus | --- | 1.146 | 0.653 | 1.057 | 0.797 | 1.235 | 0.279 | 1.258 | 0.277 |
| 1374172_at | AI010883 | Transcribed locus | --- | 1.131 | 0.655 | 0.993 | 0.967 | 1.020 | 0.504 | 0.960 | 0.626 |
| 1378730_at | AW534183 | Transcribed locus | --- | 0.931 | 0.655 | 0.588 | 0.164 | 0.996 | 0.275 | 0.671 | 0.251 |
| 1393527_at | AI501914 | Transcribed locus | --- | 0.811 | 0.655 | 1.159 | 0.143 | 1.166 | 0.864 | 1.285 | 0.035 |
| 1390796_at | AA998424 | Transcribed locus | --- | 1.110 | 0.656 | 0.655 | 0.010 | 1.655 | 0.089 | 0.952 | 0.233 |
| 1396276_at | BG662898 | Transcribed locus | --- | 0.800 | 0.656 | 0.084 | 0.001 | 0.699 | 0.190 | 0.252 | 0.002 |
| 1375086_at | BF393881 | Transcribed locus | --- | 1.197 | 0.657 | 1.010 | 0.502 | 1.002 | 0.657 | 0.778 | 0.309 |
| 1396138_at | BF544511 | Transcribed locus | --- | 1.279 | 0.660 | 0.873 | 0.246 | 1.622 | 0.013 | 1.062 | 0.097 |
| 1372221_at | BM389079 | Transcribed locus | --- | 0.854 | 0.660 | 0.683 | 0.060 | 1.117 | 0.731 | 0.941 | 0.573 |
| 1397078_at | AI111920 | Transcribed locus | --- | 1.041 | 0.660 | 0.947 | 0.827 | 0.918 | 0.408 | 1.034 | 0.888 |
| 1385892_at | AA900322 | Transcribed locus | --- | 0.664 | 0.660 | 0.280 | 0.005 | 0.788 | 0.574 | 0.278 | 0.093 |
| 1389460_at | AI231787 | Transcribed locus | --- | 1.177 | 0.660 | 1.267 | 0.062 | 0.999 | 0.378 | 1.013 | 0.307 |
| 1375925_at | BE113449 | Transcribed locus | --- | 1.533 | 0.661 | 3.105 | 0.088 | 1.200 | 0.242 | 1.903 | 0.062 |
| 1397685_at | BF553180 | Transcribed locus | --- | 0.967 | 0.661 | 0.456 | 0.027 | 0.993 | 0.973 | 0.628 | 0.079 |
| 1372833_at | AW521376 | Transcribed locus | --- | 0.826 | 0.662 | 0.808 | 0.005 | 0.750 | 0.155 | 0.844 | 0.019 |
| 1374038_at | AA799964 | Transcribed locus | --- | 0.870 | 0.662 | 0.484 | 0.001 | 1.165 | 0.974 | 0.526 | 0.000 |
| 1397589_at | BI296502 | Transcribed locus | --- | 0.593 | 0.663 | 0.826 | 0.348 | 0.520 | 0.513 | 1.291 | 0.922 |
| 1396662_at | BF410720 | Transcribed locus | --- | 0.998 | 0.665 | 0.988 | 0.811 | 0.841 | 0.081 | 1.080 | 0.269 |
| 1374130_at | BG373550 | Transcribed locus | --- | 0.864 | 0.665 | 0.760 | 0.018 | 0.403 | 0.047 | 0.690 | 0.064 |
| 1395592_at | AA957981 | Transcribed locus | --- | 1.695 | 0.665 | 1.084 | 0.381 | 2.614 | 0.083 | 1.312 | 0.052 |
| 1385314_at | AA923974 | Transcribed locus | --- | 0.818 | 0.665 | 0.795 | 0.251 | 0.500 | 0.086 | 0.443 | 0.086 |
| 1377389_at | AI145613 | Transcribed locus | --- | 1.145 | 0.665 | 0.634 | 0.111 | 1.704 | 0.813 | 0.893 | 0.061 |
| 1386828_at | BF557642 | Transcribed locus | --- | 1.153 | 0.667 | 1.025 | 0.940 | 1.273 | 0.999 | 0.886 | 0.177 |
| 1382717_at | BF386949 | Transcribed locus | --- | 0.805 | 0.668 | 0.737 | 0.958 | 1.050 | 0.065 | 1.021 | 0.628 |
| 1377224_at | BM391851 | Transcribed locus | --- | 1.320 | 0.668 | 0.663 | 0.020 | 1.063 | 0.908 | 0.691 | 0.025 |
| 1378323_at | AW524892 | Transcribed locus | --- | 1.264 | 0.669 | 0.398 | 0.016 | 1.326 | 0.671 | 0.723 | 0.140 |
| 1379376_at | BG372891 | Transcribed locus | --- | 0.994 | 0.669 | 0.910 | 0.902 | 1.543 | 0.037 | 1.089 | 0.899 |
| 1398074_at | BE109876 | Transcribed locus | --- | 1.154 | 0.669 | 0.506 | 0.422 | 0.903 | 0.642 | 0.707 | 0.185 |
| 1389218_at | AI169490 | Transcribed locus | --- | 0.817 | 0.669 | 0.414 | 0.003 | 0.951 | 0.925 | 0.562 | 0.003 |
| 1375965_at | AI229167 | Transcribed locus | --- | 0.675 | 0.670 | 0.226 | 0.004 | 1.000 | 0.295 | 0.262 | 0.007 |
| 1391584_at | AA850595 | Transcribed locus | --- | 0.814 | 0.670 | 0.472 | 0.062 | 0.628 | 0.259 | 0.504 | 0.001 |
| 1395770_at | BM391695 | Transcribed locus | --- | 1.210 | 0.670 | 1.396 | 0.204 | 1.561 | 0.009 | 1.745 | 0.835 |

|              |          |                   |     |       |       |       |       |       |       |       |       |
|--------------|----------|-------------------|-----|-------|-------|-------|-------|-------|-------|-------|-------|
| 1392675_at   | AI044784 | Transcribed locus | --- | 0.942 | 0.670 | 0.686 | 0.041 | 1.194 | 0.384 | 0.952 | 0.085 |
| 1378063_at   | AW524795 | Transcribed locus | --- | 0.652 | 0.672 | 0.800 | 0.044 | 0.961 | 0.580 | 0.958 | 0.165 |
| 1380902_at   | BE106303 | Transcribed locus | --- | 0.786 | 0.672 | 0.554 | 0.023 | 0.753 | 0.338 | 0.737 | 0.120 |
| 1391173_at   | BF389308 | Transcribed locus | --- | 1.069 | 0.674 | 0.882 | 0.069 | 0.946 | 0.689 | 1.223 | 0.628 |
| 1394601_at   | AW526910 | Transcribed locus | --- | 1.281 | 0.674 | 0.772 | 0.043 | 0.690 | 0.230 | 0.813 | 0.321 |
| 1385909_at   | BE118035 | Transcribed locus | --- | 0.941 | 0.675 | 0.214 | 0.069 | 0.646 | 0.001 | 0.469 | 0.013 |
| 1392192_at   | BF413231 | Transcribed locus | --- | 1.144 | 0.676 | 1.115 | 0.211 | 1.276 | 0.044 | 0.983 | 0.194 |
| 1383877_a_at | AW433647 | Transcribed locus | --- | 1.041 | 0.677 | 0.951 | 0.579 | 0.790 | 0.895 | 1.268 | 0.075 |
| 1372355_at   | BE109242 | Transcribed locus | --- | 0.826 | 0.677 | 0.855 | 0.319 | 0.876 | 0.068 | 0.798 | 0.286 |
| 1391215_at   | BF386303 | Transcribed locus | --- | 1.145 | 0.678 | 1.488 | 0.172 | 1.127 | 0.777 | 1.195 | 0.023 |
| 1373518_at   | AA866231 | Transcribed locus | --- | 0.959 | 0.679 | 0.775 | 0.425 | 0.963 | 0.578 | 0.973 | 0.818 |
| 1389735_at   | BE107296 | Transcribed locus | --- | 1.192 | 0.679 | 0.323 | 0.009 | 2.274 | 0.017 | 0.370 | 0.153 |
| 1371859_at   | D86655   | Transcribed locus | --- | 1.047 | 0.679 | 1.088 | 0.165 | 1.202 | 0.942 | 0.934 | 0.331 |
| 1388515_at   | BE112952 | Transcribed locus | --- | 0.877 | 0.679 | 0.945 | 0.250 | 0.770 | 0.319 | 1.056 | 0.474 |
| 1398406_at   | AI102382 | Transcribed locus | --- | 0.855 | 0.679 | 0.120 | 0.002 | 0.911 | 0.238 | 0.084 | 0.023 |
| 1374595_at   | BF282323 | Transcribed locus | --- | 1.136 | 0.680 | 1.206 | 0.803 | 1.306 | 0.782 | 0.935 | 0.570 |
| 1398195_at   | BF397286 | Transcribed locus | --- | 0.973 | 0.680 | 0.997 | 0.517 | 1.034 | 0.596 | 1.001 | 0.955 |
| 1392641_at   | AA957091 | Transcribed locus | --- | 1.129 | 0.680 | 0.704 | 0.007 | 0.880 | 0.803 | 0.662 | 0.012 |
| 1375487_at   | BI296529 | Transcribed locus | --- | 1.125 | 0.681 | 1.148 | 0.908 | 1.014 | 0.332 | 1.388 | 0.999 |
| 1391193_at   | BI288564 | Transcribed locus | --- | 0.920 | 0.682 | 0.872 | 0.367 | 1.249 | 0.173 | 0.999 | 0.820 |
| 1396021_at   | AA999128 | Transcribed locus | --- | 1.072 | 0.683 | 0.715 | 0.023 | 0.847 | 0.127 | 0.697 | 0.025 |
| 1389462_at   | BG373049 | Transcribed locus | --- | 0.884 | 0.683 | 0.870 | 0.676 | 0.941 | 0.966 | 0.979 | 0.206 |
| 1385543_at   | BF413374 | Transcribed locus | --- | 0.856 | 0.683 | 0.538 | 0.039 | 1.207 | 0.337 | 0.928 | 0.395 |
| 1384446_at   | BF402271 | Transcribed locus | --- | 0.922 | 0.683 | 0.293 | 0.061 | 1.543 | 0.276 | 0.295 | 0.062 |
| 1374126_at   | BG374261 | Transcribed locus | --- | 1.196 | 0.684 | 0.920 | 0.299 | 0.597 | 0.070 | 1.086 | 0.301 |
| 1390701_at   | BG372551 | Transcribed locus | --- | 0.759 | 0.685 | 0.868 | 0.245 | 1.063 | 0.738 | 0.892 | 0.937 |
| 1391928_at   | BF418827 | Transcribed locus | --- | 1.022 | 0.685 | 2.463 | 0.017 | 1.063 | 0.204 | 1.852 | 0.025 |
| 1381163_at   | AI229248 | Transcribed locus | --- | 0.841 | 0.685 | 2.781 | 0.000 | 0.610 | 0.043 | 1.765 | 0.003 |
| 1384521_at   | BE117499 | Transcribed locus | --- | 1.164 | 0.686 | 1.047 | 0.928 | 0.972 | 0.048 | 0.827 | 0.020 |
| 1380961_at   | AW526232 | Transcribed locus | --- | 1.115 | 0.686 | 1.088 | 0.357 | 1.195 | 0.026 | 1.130 | 0.407 |
| 1390815_at   | BF282870 | Transcribed locus | --- | 1.084 | 0.687 | 0.487 | 0.000 | 0.760 | 0.231 | 0.379 | 0.010 |
| 1394739_at   | BE102817 | Transcribed locus | --- | 0.865 | 0.688 | 0.936 | 0.414 | 0.962 | 0.559 | 0.984 | 0.751 |
| 1393131_at   | AI112338 | Transcribed locus | --- | 1.166 | 0.688 | 1.736 | 0.040 | 1.261 | 0.224 | 1.740 | 0.066 |
| 1373434_at   | AA944179 | Transcribed locus | --- | 1.268 | 0.689 | 1.042 | 0.215 | 1.020 | 0.894 | 1.193 | 0.406 |
| 1380599_at   | AI639258 | Transcribed locus | --- | 0.965 | 0.689 | 1.132 | 0.553 | 0.839 | 0.136 | 1.349 | 0.100 |
| 1377611_at   | AI145868 | Transcribed locus | --- | 1.247 | 0.690 | 1.153 | 0.117 | 1.335 | 0.600 | 1.557 | 0.010 |
| 1391763_at   | BF420184 | Transcribed locus | --- | 0.854 | 0.690 | 0.476 | 0.018 | 1.429 | 0.354 | 0.522 | 0.026 |
| 1383166_at   | BE100595 | Transcribed locus | --- | 0.844 | 0.690 | 0.853 | 0.063 | 0.879 | 0.316 | 0.981 | 0.241 |
| 1384958_at   | BI279112 | Transcribed locus | --- | 0.741 | 0.691 | 0.909 | 0.089 | 0.810 | 0.081 | 0.901 | 0.939 |
| 1379259_at   | AW534671 | Transcribed locus | --- | 0.971 | 0.691 | 1.838 | 0.036 | 1.059 | 0.708 | 1.448 | 0.219 |
| 1390917_at   | AI227828 | Transcribed locus | --- | 1.211 | 0.691 | 1.247 | 0.152 | 1.011 | 0.538 | 1.051 | 0.147 |
| 1394577_at   | BI279384 | Transcribed locus | --- | 0.883 | 0.692 | 0.430 | 0.025 | 1.550 | 0.543 | 0.595 | 0.041 |
| 1389797_at   | AI317854 | Transcribed locus | --- | 0.843 | 0.693 | 0.545 | 0.015 | 0.886 | 0.926 | 0.442 | 0.126 |
| 1374383_at   | BE121006 | Transcribed locus | --- | 0.914 | 0.694 | 0.995 | 0.353 | 0.449 | 0.184 | 1.090 | 0.923 |
| 1382520_at   | AI008244 | Transcribed locus | --- | 0.862 | 0.695 | 1.951 | 0.352 | 1.508 | 0.064 | 1.002 | 0.154 |
| 1374155_at   | BF410502 | Transcribed locus | --- | 0.956 | 0.696 | 0.556 | 0.025 | 1.256 | 0.020 | 0.373 | 0.020 |
| 1395242_at   | BF419005 | Transcribed locus | --- | 1.128 | 0.696 | 0.996 | 0.940 | 0.992 | 0.151 | 0.983 | 0.948 |
| 1380520_at   | BI295810 | Transcribed locus | --- | 0.973 | 0.697 | 0.990 | 0.974 | 1.073 | 0.182 | 1.163 | 0.946 |
| 1388418_at   | BG378875 | Transcribed locus | --- | 0.980 | 0.697 | 0.501 | 0.005 | 0.830 | 0.104 | 0.640 | 0.025 |
| 1377213_at   | BI280353 | Transcribed locus | --- | 1.066 | 0.697 | 3.443 | 0.000 | 0.870 | 0.227 | 3.104 | 0.003 |
| 1391406_at   | AI169572 | Transcribed locus | --- | 0.939 | 0.698 | 0.755 | 0.038 | 0.936 | 0.125 | 0.721 | 0.013 |
| 1379675_at   | BF402435 | Transcribed locus | --- | 1.112 | 0.699 | 1.017 | 0.327 | 1.111 | 0.171 | 0.947 | 0.997 |
| 1377637_at   | AW916093 | Transcribed locus | --- | 1.272 | 0.699 | 1.531 | 0.209 | 1.426 | 0.012 | 0.728 | 0.328 |
| 1385597_at   | AI709508 | Transcribed locus | --- | 1.904 | 0.700 | 0.418 | 0.026 | 0.695 | 0.268 | 0.468 | 0.025 |
| 1397616_at   | BI292232 | Transcribed locus | --- | 0.955 | 0.700 | 0.655 | 0.126 | 1.084 | 0.047 | 0.731 | 0.147 |
| 1379555_at   | AI233902 | Transcribed locus | --- | 1.160 | 0.701 | 0.898 | 0.770 | 1.317 | 0.397 | 0.652 | 0.179 |
| 1399085_at   | BM384770 | Transcribed locus | --- | 0.995 | 0.701 | 0.588 | 0.004 | 1.068 | 0.687 | 0.690 | 0.001 |
| 1393173_at   | BG668164 | Transcribed locus | --- | 1.160 | 0.701 | 0.791 | 0.019 | 0.955 | 0.669 | 0.887 | 0.803 |
| 1396954_at   | BM386206 | Transcribed locus | --- | 1.033 | 0.701 | 0.954 | 0.781 | 1.212 | 0.703 | 0.952 | 0.471 |
| 1397134_at   | BF414458 | Transcribed locus | --- | 0.923 | 0.701 | 1.168 | 0.676 | 1.045 | 0.640 | 0.903 | 0.533 |
| 1399104_at   | BI287258 | Transcribed locus | --- | 1.000 | 0.702 | 0.467 | 0.012 | 0.833 | 0.485 | 0.459 | 0.067 |

|            |          |                   |     |       |       |       |       |       |       |       |       |
|------------|----------|-------------------|-----|-------|-------|-------|-------|-------|-------|-------|-------|
| 1379738_at | AI007726 | Transcribed locus | --- | 1.921 | 0.702 | 0.719 | 0.165 | 1.042 | 0.483 | 1.167 | 0.157 |
| 1393252_at | AA996804 | Transcribed locus | --- | 1.038 | 0.705 | 1.328 | 0.781 | 1.174 | 0.933 | 1.014 | 0.439 |
| 1397301_at | BM386743 | Transcribed locus | --- | 0.924 | 0.705 | 0.499 | 0.040 | 1.551 | 0.178 | 0.867 | 0.186 |
| 1374087_at | AI411088 | Transcribed locus | --- | 0.993 | 0.705 | 0.962 | 0.802 | 0.997 | 0.253 | 1.051 | 0.841 |
| 1374613_at | BE100609 | Transcribed locus | --- | 0.868 | 0.706 | 0.385 | 0.001 | 1.008 | 0.624 | 0.577 | 0.011 |
| 1385911_at | AI235281 | Transcribed locus | --- | 1.050 | 0.706 | 0.574 | 0.068 | 1.134 | 0.482 | 0.714 | 0.090 |
| 1390301_at | AW524414 | Transcribed locus | --- | 0.903 | 0.707 | 0.858 | 0.697 | 0.704 | 0.285 | 0.679 | 0.099 |
| 1397422_at | BF390904 | Transcribed locus | --- | 1.252 | 0.712 | 1.158 | 0.580 | 1.002 | 0.994 | 0.714 | 0.782 |
| 1382960_at | BE108047 | Transcribed locus | --- | 0.990 | 0.713 | 0.997 | 0.979 | 0.978 | 0.361 | 1.104 | 0.680 |
| 1390557_at | BF394809 | Transcribed locus | --- | 0.729 | 0.713 | 0.837 | 0.052 | 0.627 | 0.214 | 0.849 | 0.128 |
| 1379208_at | BE113484 | Transcribed locus | --- | 1.185 | 0.714 | 1.454 | 0.075 | 1.049 | 0.696 | 0.954 | 0.813 |
| 1371667_at | BG380728 | Transcribed locus | --- | 0.868 | 0.715 | 0.815 | 0.023 | 0.891 | 0.204 | 0.949 | 0.247 |
| 1399090_at | AA944459 | Transcribed locus | --- | 0.634 | 0.715 | 0.875 | 0.158 | 0.513 | 0.080 | 0.747 | 0.028 |
| 1385877_at | BI294012 | Transcribed locus | --- | 0.911 | 0.716 | 0.791 | 0.897 | 0.998 | 0.933 | 0.789 | 0.279 |
| 1380975_at | AW534466 | Transcribed locus | --- | 1.095 | 0.716 | 0.775 | 0.331 | 1.118 | 0.501 | 0.758 | 0.314 |
| 1373680_at | AA800708 | Transcribed locus | --- | 1.050 | 0.718 | 0.751 | 0.152 | 1.036 | 0.802 | 0.666 | 0.046 |
| 1373505_at | BI287800 | Transcribed locus | --- | 1.058 | 0.719 | 1.719 | 0.005 | 0.801 | 0.105 | 1.361 | 0.009 |
| 1375012_at | BF399627 | Transcribed locus | --- | 0.950 | 0.719 | 0.407 | 0.024 | 1.494 | 0.133 | 0.500 | 0.010 |
| 1385521_at | AI603505 | Transcribed locus | --- | 1.117 | 0.721 | 0.998 | 0.483 | 1.094 | 0.256 | 0.766 | 0.191 |
| 1392968_at | BI300566 | Transcribed locus | --- | 0.848 | 0.721 | 0.265 | 0.002 | 0.426 | 0.301 | 0.376 | 0.003 |
| 1384004_at | AI030360 | Transcribed locus | --- | 0.684 | 0.725 | 0.639 | 0.005 | 0.562 | 0.051 | 0.773 | 0.052 |
| 1395004_at | BF397827 | Transcribed locus | --- | 1.504 | 0.725 | 1.068 | 0.655 | 1.158 | 0.837 | 0.839 | 0.495 |
| 1378673_at | AI071509 | Transcribed locus | --- | 1.077 | 0.727 | 1.049 | 0.506 | 1.357 | 0.008 | 0.999 | 0.997 |
| 1378616_at | BG380791 | Transcribed locus | --- | 0.977 | 0.727 | 0.816 | 0.127 | 0.997 | 0.926 | 0.721 | 0.116 |
| 1386589_at | AW143518 | Transcribed locus | --- | 0.814 | 0.728 | 0.547 | 0.008 | 0.401 | 0.028 | 0.569 | 0.003 |
| 1397698_at | AW917627 | Transcribed locus | --- | 0.796 | 0.728 | 0.511 | 0.059 | 0.520 | 0.170 | 0.634 | 0.008 |
| 1383174_at | AI576562 | Transcribed locus | --- | 1.108 | 0.729 | 0.244 | 0.002 | 1.030 | 0.907 | 0.556 | 0.007 |
| 1374994_at | BF394281 | Transcribed locus | --- | 1.035 | 0.729 | 0.403 | 0.020 | 1.002 | 0.991 | 0.302 | 0.000 |
| 1377875_at | BF400747 | Transcribed locus | --- | 0.514 | 0.730 | 0.103 | 0.001 | 0.733 | 0.710 | 0.208 | 0.009 |
| 1399066_at | AI236763 | Transcribed locus | --- | 0.950 | 0.730 | 0.642 | 0.003 | 0.907 | 0.455 | 0.608 | 0.005 |
| 1378117_at | BF396269 | Transcribed locus | --- | 1.046 | 0.731 | 1.075 | 0.374 | 0.846 | 0.377 | 1.288 | 0.023 |
| 1375705_at | AI103622 | Transcribed locus | --- | 0.907 | 0.731 | 0.457 | 0.022 | 0.651 | 0.281 | 0.479 | 0.007 |
| 1392587_at | BE115141 | Transcribed locus | --- | 1.421 | 0.733 | 0.843 | 0.158 | 1.034 | 0.930 | 1.033 | 0.100 |
| 1392144_at | BF391491 | Transcribed locus | --- | 1.130 | 0.733 | 0.837 | 0.306 | 0.999 | 0.389 | 0.962 | 0.384 |
| 1395944_at | AI548667 | Transcribed locus | --- | 0.942 | 0.734 | 0.814 | 0.225 | 0.958 | 0.984 | 0.816 | 0.267 |
| 1377132_at | AW527797 | Transcribed locus | --- | 0.957 | 0.734 | 1.198 | 0.192 | 1.153 | 0.615 | 1.231 | 0.111 |
| 1385637_at | AI029494 | Transcribed locus | --- | 1.479 | 0.734 | 1.029 | 0.501 | 1.865 | 0.053 | 1.002 | 0.994 |
| 1399119_at | BI282030 | Transcribed locus | --- | 0.932 | 0.734 | 2.328 | 0.016 | 1.142 | 0.395 | 1.658 | 0.035 |
| 1374700_at | BF388903 | Transcribed locus | --- | 1.071 | 0.735 | 1.295 | 0.127 | 1.156 | 0.226 | 1.625 | 0.129 |
| 1376060_at | BF416794 | Transcribed locus | --- | 1.075 | 0.736 | 0.673 | 0.006 | 1.084 | 0.139 | 0.605 | 0.047 |
| 1379915_at | BF393083 | Transcribed locus | --- | 0.836 | 0.736 | 1.262 | 0.714 | 1.313 | 0.309 | 1.404 | 0.052 |
| 1376771_at | BF412303 | Transcribed locus | --- | 1.157 | 0.737 | 0.829 | 0.950 | 0.800 | 0.787 | 0.970 | 0.320 |
| 1390597_at | BF419818 | Transcribed locus | --- | 0.981 | 0.737 | 0.962 | 0.634 | 0.967 | 0.739 | 0.981 | 0.883 |
| 1390952_at | AI144822 | Transcribed locus | --- | 1.207 | 0.737 | 1.266 | 0.127 | 0.488 | 0.069 | 1.033 | 0.146 |
| 1385156_at | BE120415 | Transcribed locus | --- | 0.962 | 0.738 | 0.997 | 0.992 | 0.994 | 0.915 | 1.009 | 0.967 |
| 1391400_at | BI296500 | Transcribed locus | --- | 1.002 | 0.738 | 0.843 | 0.065 | 1.090 | 0.480 | 0.584 | 0.075 |
| 1395085_at | BF386354 | Transcribed locus | --- | 1.058 | 0.738 | 1.085 | 0.576 | 0.861 | 0.716 | 1.518 | 0.098 |
| 1379799_at | BF415056 | Transcribed locus | --- | 0.405 | 0.738 | 2.378 | 0.101 | 0.670 | 0.357 | 0.963 | 0.996 |
| 1383087_at | BF409251 | Transcribed locus | --- | 1.134 | 0.739 | 0.848 | 0.384 | 1.568 | 0.018 | 1.152 | 0.683 |
| 1395499_at | BF392443 | Transcribed locus | --- | 1.117 | 0.739 | 1.453 | 0.080 | 1.001 | 0.189 | 1.000 | 0.952 |
| 1394816_at | AI501478 | Transcribed locus | --- | 0.927 | 0.739 | 0.819 | 0.971 | 0.886 | 0.477 | 0.843 | 0.996 |
| 1391337_at | BE116623 | Transcribed locus | --- | 0.849 | 0.740 | 0.419 | 0.026 | 0.999 | 0.986 | 0.624 | 0.168 |
| 1373792_at | AI228348 | Transcribed locus | --- | 0.884 | 0.741 | 0.914 | 0.431 | 0.809 | 0.351 | 1.020 | 0.696 |
| 1381038_at | BE101442 | Transcribed locus | --- | 1.010 | 0.743 | 0.999 | 0.925 | 1.018 | 0.833 | 0.990 | 0.967 |
| 1381354_at | BF403728 | Transcribed locus | --- | 1.192 | 0.743 | 0.562 | 0.120 | 0.893 | 0.974 | 0.676 | 0.110 |
| 1380714_at | AI600230 | Transcribed locus | --- | 1.103 | 0.745 | 0.825 | 0.510 | 1.002 | 0.797 | 0.673 | 0.199 |
| 1398328_at | BM389797 | Transcribed locus | --- | 1.088 | 0.745 | 0.876 | 0.960 | 0.572 | 0.808 | 0.608 | 0.100 |
| 1384199_at | BF395951 | Transcribed locus | --- | 1.764 | 0.746 | 1.470 | 0.923 | 1.641 | 0.220 | 1.136 | 0.410 |
| 1371711_at | AA800689 | Transcribed locus | --- | 0.816 | 0.746 | 0.763 | 0.069 | 0.666 | 0.079 | 0.721 | 0.009 |
| 1380075_at | BF390843 | Transcribed locus | --- | 1.161 | 0.749 | 0.618 | 0.083 | 0.958 | 0.679 | 0.824 | 0.149 |
| 1382108_at | AA900536 | Transcribed locus | --- | 0.985 | 0.750 | 0.903 | 0.603 | 0.660 | 0.026 | 0.999 | 0.803 |



|            |          |                   |     |       |       |       |       |       |       |       |       |
|------------|----------|-------------------|-----|-------|-------|-------|-------|-------|-------|-------|-------|
| 1372285_at | BM389061 | Transcribed locus | --- | 0.810 | 0.753 | 0.611 | 0.056 | 0.776 | 0.165 | 0.864 | 0.302 |
| 1381147_at | BF409065 | Transcribed locus | --- | 0.894 | 0.754 | 0.255 | 0.007 | 0.706 | 0.138 | 0.292 | 0.032 |
| 1379951_at | BE104039 | Transcribed locus | --- | 1.033 | 0.754 | 0.893 | 0.972 | 0.999 | 0.995 | 1.025 | 0.996 |
| 1395457_at | BM387150 | Transcribed locus | --- | 1.406 | 0.755 | 1.351 | 0.720 | 0.913 | 0.810 | 1.027 | 0.438 |
| 1382159_at | BF386740 | Transcribed locus | --- | 1.038 | 0.755 | 0.871 | 0.402 | 0.986 | 0.184 | 0.926 | 0.234 |
| 1389352_at | BF281980 | Transcribed locus | --- | 0.898 | 0.755 | 0.470 | 0.015 | 1.255 | 0.089 | 0.670 | 0.001 |
| 1398235_at | BE097092 | Transcribed locus | --- | 1.049 | 0.755 | 0.644 | 0.617 | 0.788 | 0.113 | 0.885 | 0.512 |
| 1380603_at | AI044853 | Transcribed locus | --- | 1.007 | 0.756 | 1.213 | 0.908 | 0.930 | 0.476 | 1.190 | 1.000 |
| 1381471_at | AI060117 | Transcribed locus | --- | 0.956 | 0.757 | 0.782 | 0.334 | 1.766 | 0.001 | 0.964 | 0.417 |
| 1394979_at | BE101703 | Transcribed locus | --- | 0.998 | 0.758 | 0.599 | 0.046 | 0.780 | 0.638 | 0.628 | 0.077 |
| 1392331_at | BE100256 | Transcribed locus | --- | 1.029 | 0.758 | 0.950 | 0.818 | 1.264 | 0.215 | 0.945 | 0.759 |
| 1379617_at | BF288779 | Transcribed locus | --- | 0.937 | 0.759 | 1.626 | 0.395 | 1.232 | 0.885 | 1.206 | 0.875 |
| 1374493_at | H35017   | Transcribed locus | --- | 1.107 | 0.759 | 0.991 | 0.889 | 0.783 | 0.320 | 0.993 | 0.552 |
| 1376404_at | AI639317 | Transcribed locus | --- | 1.027 | 0.759 | 0.736 | 0.222 | 0.588 | 0.051 | 0.620 | 0.084 |
| 1390517_at | BM392260 | Transcribed locus | --- | 0.890 | 0.760 | 0.558 | 0.045 | 0.825 | 0.436 | 0.782 | 0.885 |
| 1394525_at | BM385125 | Transcribed locus | --- | 1.165 | 0.761 | 1.196 | 0.168 | 1.444 | 0.513 | 1.243 | 0.188 |
| 1386683_at | BF562870 | Transcribed locus | --- | 1.168 | 0.762 | 0.371 | 0.023 | 0.854 | 0.100 | 0.508 | 0.003 |
| 1391496_at | AA819635 | Transcribed locus | --- | 0.933 | 0.763 | 0.554 | 0.014 | 0.752 | 0.213 | 0.616 | 0.007 |
| 1381837_at | AI502137 | Transcribed locus | --- | 0.958 | 0.764 | 0.649 | 0.009 | 0.963 | 0.542 | 0.446 | 0.008 |
| 1396502_at | BF405162 | Transcribed locus | --- | 1.104 | 0.765 | 0.924 | 0.341 | 1.046 | 0.882 | 0.854 | 0.390 |
| 1375562_at | BF408460 | Transcribed locus | --- | 0.963 | 0.766 | 1.115 | 0.770 | 0.559 | 0.714 | 0.962 | 0.757 |
| 1378903_at | AI712467 | Transcribed locus | --- | 1.006 | 0.767 | 1.000 | 0.944 | 1.159 | 0.386 | 1.112 | 0.973 |
| 1391511_at | AA997877 | Transcribed locus | --- | 0.875 | 0.768 | 0.855 | 0.434 | 1.135 | 0.773 | 1.027 | 0.920 |
| 1392768_at | AA900944 | Transcribed locus | --- | 0.983 | 0.768 | 0.912 | 0.293 | 1.089 | 0.388 | 0.783 | 0.375 |
| 1375431_at | AW531861 | Transcribed locus | --- | 0.694 | 0.768 | 0.707 | 0.027 | 0.425 | 0.029 | 0.785 | 0.076 |
| 1386109_at | BF287631 | Transcribed locus | --- | 1.374 | 0.768 | 1.115 | 0.459 | 1.413 | 0.219 | 1.030 | 0.493 |
| 1375235_at | BG378732 | Transcribed locus | --- | 1.305 | 0.768 | 0.985 | 0.956 | 1.194 | 0.397 | 0.993 | 0.804 |
| 1376619_at | AI412803 | Transcribed locus | --- | 0.947 | 0.770 | 1.360 | 0.611 | 1.255 | 0.207 | 1.055 | 0.920 |
| 1384193_at | AI235607 | Transcribed locus | --- | 1.340 | 0.771 | 1.113 | 0.636 | 1.369 | 0.460 | 1.010 | 0.549 |
| 1380387_at | BE105492 | Transcribed locus | --- | 1.967 | 0.772 | 0.714 | 0.514 | 1.487 | 0.764 | 0.922 | 0.521 |
| 1381916_at | AA997234 | Transcribed locus | --- | 1.269 | 0.772 | 0.866 | 0.970 | 1.009 | 0.958 | 0.737 | 0.125 |
| 1375591_at | AI101245 | Transcribed locus | --- | 1.303 | 0.772 | 0.496 | 0.012 | 1.221 | 0.970 | 0.626 | 0.019 |
| 1376378_at | BF393577 | Transcribed locus | --- | 0.957 | 0.772 | 1.001 | 0.430 | 1.305 | 0.050 | 0.941 | 0.429 |
| 1383334_at | AW921244 | Transcribed locus | --- | 0.790 | 0.772 | 0.613 | 0.186 | 0.908 | 0.376 | 0.644 | 0.016 |
| 1379528_at | BI284017 | Transcribed locus | --- | 1.118 | 0.773 | 1.104 | 0.648 | 1.065 | 0.504 | 1.040 | 0.725 |
| 1393200_at | AI500827 | Transcribed locus | --- | 0.981 | 0.774 | 0.926 | 0.419 | 0.857 | 0.123 | 0.820 | 0.461 |
| 1377474_at | AI007668 | Transcribed locus | --- | 0.909 | 0.774 | 1.528 | 0.060 | 0.722 | 0.034 | 1.451 | 0.250 |
| 1384035_at | AW536030 | Transcribed locus | --- | 1.453 | 0.775 | 0.599 | 0.112 | 1.022 | 0.991 | 1.457 | 0.634 |
| 1378036_at | AI029387 | Transcribed locus | --- | 1.004 | 0.775 | 0.549 | 0.000 | 1.309 | 0.020 | 0.700 | 0.007 |
| 1371864_at | AW524563 | Transcribed locus | --- | 1.176 | 0.775 | 1.040 | 0.346 | 1.180 | 0.553 | 0.942 | 0.202 |
| 1372816_at | BE107319 | Transcribed locus | --- | 0.675 | 0.776 | 0.542 | 0.002 | 0.595 | 0.051 | 0.536 | 0.002 |
| 1395366_at | BG669749 | Transcribed locus | --- | 0.684 | 0.778 | 1.365 | 0.040 | 1.005 | 0.963 | 1.451 | 0.105 |
| 1377750_at | AI454536 | Transcribed locus | --- | 0.964 | 0.778 | 0.397 | 0.002 | 1.609 | 0.000 | 0.437 | 0.001 |
| 1389495_at | BF394211 | Transcribed locus | --- | 1.060 | 0.779 | 0.999 | 0.961 | 1.090 | 0.150 | 0.986 | 0.786 |
| 1385734_at | BE118753 | Transcribed locus | --- | 1.063 | 0.779 | 0.656 | 0.014 | 1.065 | 0.553 | 0.903 | 0.375 |
| 1399096_at | AA894279 | Transcribed locus | --- | 1.259 | 0.779 | 0.470 | 0.012 | 1.101 | 0.320 | 0.585 | 0.271 |
| 1378188_at | BE102810 | Transcribed locus | --- | 0.914 | 0.782 | 0.983 | 0.583 | 1.166 | 0.650 | 0.885 | 0.192 |
| 1383521_at | AW915081 | Transcribed locus | --- | 0.958 | 0.782 | 1.074 | 0.352 | 1.122 | 0.362 | 1.110 | 0.012 |
| 1374214_at | AI235359 | Transcribed locus | --- | 1.051 | 0.786 | 1.083 | 0.207 | 0.693 | 0.007 | 1.223 | 0.252 |
| 1395720_at | BE098012 | Transcribed locus | --- | 0.813 | 0.786 | 0.405 | 0.112 | 0.961 | 0.651 | 0.376 | 0.017 |
| 1394395_at | BG668719 | Transcribed locus | --- | 1.095 | 0.786 | 0.257 | 0.003 | 0.904 | 0.665 | 0.395 | 0.059 |
| 1382789_at | BM389812 | Transcribed locus | --- | 1.719 | 0.786 | 1.754 | 0.002 | 2.233 | 0.050 | 1.304 | 0.291 |
| 1397784_at | BI297092 | Transcribed locus | --- | 0.815 | 0.789 | 0.409 | 0.015 | 0.745 | 0.733 | 0.470 | 0.008 |
| 1382086_at | AI235883 | Transcribed locus | --- | 1.034 | 0.789 | 1.028 | 0.631 | 2.546 | 0.044 | 1.012 | 0.938 |
| 1396883_at | AI548898 | Transcribed locus | --- | 0.747 | 0.791 | 0.973 | 0.912 | 0.898 | 0.997 | 1.542 | 0.178 |
| 1395862_at | BF397879 | Transcribed locus | --- | 1.142 | 0.791 | 1.135 | 0.521 | 1.097 | 0.627 | 0.756 | 0.275 |
| 1390431_at | AI111559 | Transcribed locus | --- | 1.020 | 0.792 | 0.340 | 0.016 | 0.910 | 0.880 | 0.415 | 0.012 |
| 1372901_at | BM386850 | Transcribed locus | --- | 0.781 | 0.792 | 1.244 | 0.567 | 0.623 | 0.367 | 1.075 | 0.590 |
| 1385271_at | AI763870 | Transcribed locus | --- | 0.835 | 0.793 | 0.470 | 0.005 | 0.707 | 0.142 | 0.730 | 0.071 |
| 1396044_at | AI706203 | Transcribed locus | --- | 1.198 | 0.795 | 1.287 | 0.571 | 1.013 | 0.379 | 0.868 | 0.523 |
| 1389401_at | BI294956 | Transcribed locus | --- | 0.983 | 0.795 | 0.875 | 0.326 | 0.532 | 0.004 | 0.729 | 0.071 |

|            |          |                   |     |       |       |       |       |       |       |       |       |
|------------|----------|-------------------|-----|-------|-------|-------|-------|-------|-------|-------|-------|
| 1378076_at | AA963273 | Transcribed locus | --- | 1.054 | 0.796 | 0.532 | 0.007 | 1.149 | 0.677 | 0.576 | 0.006 |
| 1381549_at | BG376818 | Transcribed locus | --- | 1.048 | 0.797 | 1.508 | 0.031 | 3.057 | 0.041 | 1.209 | 0.212 |
| 1374920_at | AI228955 | Transcribed locus | --- | 0.925 | 0.798 | 0.552 | 0.006 | 0.931 | 0.306 | 0.441 | 0.008 |
| 1379097_at | BF416779 | Transcribed locus | --- | 0.986 | 0.798 | 0.700 | 0.023 | 0.372 | 0.087 | 0.834 | 0.331 |
| 1381146_at | AW434387 | Transcribed locus | --- | 1.326 | 0.799 | 1.233 | 0.345 | 1.151 | 0.609 | 0.942 | 0.024 |
| 1380383_at | AI030650 | Transcribed locus | --- | 0.975 | 0.799 | 0.297 | 0.004 | 0.729 | 0.061 | 0.476 | 0.008 |
| 1379416_at | AW535897 | Transcribed locus | --- | 1.560 | 0.799 | 0.609 | 0.078 | 1.216 | 0.501 | 1.035 | 0.965 |
| 1378258_at | AI716449 | Transcribed locus | --- | 0.856 | 0.800 | 0.999 | 0.969 | 1.200 | 0.022 | 1.003 | 0.994 |
| 1375676_at | AA956897 | Transcribed locus | --- | 1.002 | 0.801 | 0.947 | 0.617 | 1.243 | 0.706 | 1.052 | 0.201 |
| 1374186_at | BE109362 | Transcribed locus | --- | 0.970 | 0.801 | 1.268 | 0.121 | 0.978 | 0.194 | 1.162 | 0.982 |
| 1383509_at | BF551003 | Transcribed locus | --- | 1.207 | 0.801 | 1.325 | 0.008 | 1.090 | 0.505 | 0.971 | 0.127 |
| 1389748_at | BE118122 | Transcribed locus | --- | 1.444 | 0.803 | 0.642 | 0.118 | 1.338 | 0.504 | 1.085 | 0.757 |
| 1383740_at | AI029740 | Transcribed locus | --- | 0.747 | 0.804 | 0.927 | 0.090 | 0.885 | 0.537 | 0.817 | 0.028 |
| 1390631_at | BE107619 | Transcribed locus | --- | 1.303 | 0.804 | 3.014 | 0.005 | 1.017 | 0.343 | 1.877 | 0.006 |
| 1392183_at | AI547389 | Transcribed locus | --- | 1.408 | 0.805 | 1.093 | 0.620 | 1.293 | 0.742 | 1.012 | 0.435 |
| 1378439_at | AI175531 | Transcribed locus | --- | 1.435 | 0.806 | 1.244 | 0.282 | 1.794 | 0.240 | 1.123 | 0.395 |
| 1390173_at | BG377886 | Transcribed locus | --- | 1.105 | 0.808 | 0.991 | 0.451 | 1.006 | 0.978 | 0.999 | 0.621 |
| 1381684_at | BM391296 | Transcribed locus | --- | 1.006 | 0.809 | 2.392 | 0.234 | 1.518 | 0.398 | 1.636 | 0.086 |
| 1394809_at | AW522733 | Transcribed locus | --- | 1.050 | 0.809 | 0.854 | 0.846 | 0.912 | 0.718 | 1.013 | 0.953 |
| 1378921_at | BF407470 | Transcribed locus | --- | 0.981 | 0.810 | 0.965 | 0.999 | 1.054 | 0.983 | 0.817 | 0.057 |
| 1391599_at | AA875010 | Transcribed locus | --- | 1.015 | 0.811 | 0.797 | 0.193 | 0.653 | 0.245 | 0.468 | 0.057 |
| 1392909_at | AT005674 | Transcribed locus | --- | 1.014 | 0.811 | 0.512 | 0.830 | 1.021 | 0.062 | 0.851 | 0.543 |
| 1395307_at | AI409823 | Transcribed locus | --- | 1.300 | 0.812 | 0.994 | 0.934 | 1.030 | 0.710 | 0.999 | 0.976 |
| 1377617_at | BF550438 | Transcribed locus | --- | 0.834 | 0.812 | 0.546 | 0.024 | 0.846 | 0.094 | 0.609 | 0.022 |
| 1386600_at | BF522129 | Transcribed locus | --- | 0.805 | 0.813 | 1.535 | 0.056 | 0.639 | 0.238 | 0.960 | 0.831 |
| 1386286_at | AI639322 | Transcribed locus | --- | 0.935 | 0.814 | 0.119 | 0.010 | 1.646 | 0.438 | 0.386 | 0.080 |
| 1374251_at | AA893192 | Transcribed locus | --- | 1.098 | 0.814 | 0.541 | 0.022 | 1.146 | 0.958 | 0.793 | 0.195 |
| 1392487_at | BI303896 | Transcribed locus | --- | 1.075 | 0.815 | 1.505 | 0.041 | 0.850 | 0.785 | 0.969 | 0.548 |
| 1390615_at | BI281629 | Transcribed locus | --- | 1.382 | 0.815 | 1.485 | 0.235 | 0.461 | 0.592 | 1.845 | 0.406 |
| 1390298_at | BI287856 | Transcribed locus | --- | 0.994 | 0.815 | 1.393 | 0.025 | 1.093 | 0.468 | 1.190 | 0.780 |
| 1383861_at | BF394135 | Transcribed locus | --- | 0.983 | 0.816 | 0.751 | 0.044 | 0.793 | 0.383 | 0.828 | 0.162 |
| 1373851_at | AI171998 | Transcribed locus | --- | 0.661 | 0.816 | 0.923 | 0.039 | 0.915 | 0.458 | 0.928 | 0.356 |
| 1393115_at | BI293687 | Transcribed locus | --- | 1.670 | 0.817 | 0.864 | 0.310 | 0.998 | 0.888 | 0.717 | 0.138 |
| 1382444_at | AA925250 | Transcribed locus | --- | 1.071 | 0.817 | 1.624 | 0.036 | 1.152 | 0.769 | 1.202 | 0.664 |
| 1398382_at | AI175556 | Transcribed locus | --- | 0.887 | 0.817 | 1.541 | 0.005 | 0.588 | 0.258 | 1.229 | 0.484 |
| 1396530_at | BE120509 | Transcribed locus | --- | 1.319 | 0.817 | 1.597 | 0.450 | 1.710 | 0.309 | 1.364 | 0.318 |
| 1389064_at | BE111732 | Transcribed locus | --- | 0.975 | 0.818 | 1.284 | 0.133 | 0.719 | 0.304 | 0.979 | 0.855 |
| 1384366_at | BI283477 | Transcribed locus | --- | 1.130 | 0.820 | 0.889 | 0.386 | 1.133 | 0.203 | 0.583 | 0.013 |
| 1373944_at | AW530292 | Transcribed locus | --- | 1.052 | 0.820 | 0.916 | 0.076 | 0.939 | 0.433 | 0.946 | 0.365 |
| 1390778_at | AI556731 | Transcribed locus | --- | 1.321 | 0.820 | 1.204 | 0.917 | 0.722 | 0.193 | 0.987 | 0.908 |
| 1381071_at | AI112096 | Transcribed locus | --- | 0.732 | 0.821 | 0.731 | 0.114 | 1.388 | 0.224 | 0.929 | 0.896 |
| 1367534_at | BG374688 | Transcribed locus | --- | 0.894 | 0.822 | 0.761 | 0.241 | 0.654 | 0.439 | 0.803 | 0.197 |
| 1397407_at | AI137564 | Transcribed locus | --- | 0.970 | 0.822 | 0.777 | 0.041 | 1.573 | 0.100 | 0.937 | 0.031 |
| 1386065_at | AI169118 | Transcribed locus | --- | 0.931 | 0.822 | 5.043 | 0.000 | 1.179 | 0.603 | 4.564 | 0.000 |
| 1371636_at | BE104321 | Transcribed locus | --- | 0.933 | 0.822 | 0.724 | 0.036 | 0.950 | 0.188 | 0.858 | 0.150 |
| 1376181_at | BG668724 | Transcribed locus | --- | 0.820 | 0.822 | 1.390 | 0.121 | 1.106 | 0.011 | 1.926 | 0.053 |
| 1396000_at | AI704583 | Transcribed locus | --- | 1.037 | 0.822 | 0.997 | 0.977 | 1.090 | 0.680 | 1.468 | 0.139 |
| 1398187_at | BM391924 | Transcribed locus | --- | 1.092 | 0.822 | 1.043 | 0.498 | 1.229 | 0.058 | 0.833 | 0.502 |
| 1395548_at | BG666506 | Transcribed locus | --- | 0.949 | 0.824 | 0.529 | 0.070 | 1.418 | 0.164 | 0.483 | 0.046 |
| 1383716_at | BF556301 | Transcribed locus | --- | 0.818 | 0.824 | 0.856 | 0.231 | 1.047 | 0.482 | 0.897 | 0.534 |
| 1371960_at | AI230548 | Transcribed locus | --- | 0.849 | 0.825 | 0.798 | 0.050 | 1.142 | 0.426 | 0.929 | 0.537 |
| 1378601_at | AI413056 | Transcribed locus | --- | 1.061 | 0.825 | 0.966 | 0.871 | 1.006 | 0.925 | 0.716 | 0.777 |
| 1386474_at | H31753   | Transcribed locus | --- | 0.730 | 0.825 | 0.776 | 0.529 | 1.002 | 0.994 | 1.469 | 0.301 |
| 1373839_at | BG372386 | Transcribed locus | --- | 0.660 | 0.826 | 0.943 | 0.820 | 0.705 | 0.578 | 1.294 | 0.439 |
| 1390373_at | BE107528 | Transcribed locus | --- | 1.183 | 0.827 | 2.503 | 0.005 | 0.487 | 0.006 | 1.613 | 0.020 |
| 1378444_at | AI175473 | Transcribed locus | --- | 1.059 | 0.827 | 0.200 | 0.001 | 0.927 | 0.533 | 0.159 | 0.032 |
| 1396428_at | BF409243 | Transcribed locus | --- | 1.016 | 0.827 | 0.949 | 0.330 | 1.017 | 0.858 | 0.957 | 0.396 |
| 1379934_at | BI285676 | Transcribed locus | --- | 0.763 | 0.827 | 0.456 | 0.008 | 0.588 | 0.052 | 0.509 | 0.023 |
| 1383439_at | BI278550 | Transcribed locus | --- | 0.997 | 0.827 | 1.196 | 0.482 | 0.892 | 0.721 | 0.746 | 0.075 |
| 1378268_at | AI554986 | Transcribed locus | --- | 0.922 | 0.827 | 1.005 | 0.966 | 0.971 | 0.981 | 0.901 | 0.408 |
| 1383843_at | AA945568 | Transcribed locus | --- | 0.666 | 0.828 | 0.336 | 0.042 | 0.395 | 0.091 | 0.509 | 0.102 |

|              |          |                   |     |       |       |       |       |       |       |       |       |
|--------------|----------|-------------------|-----|-------|-------|-------|-------|-------|-------|-------|-------|
| 1392699_at   | BF411888 | Transcribed locus | --- | 1.003 | 0.828 | 0.993 | 0.904 | 0.967 | 0.754 | 1.217 | 0.215 |
| 1394541_at   | BM387754 | Transcribed locus | --- | 1.081 | 0.829 | 1.188 | 0.279 | 1.139 | 0.086 | 1.262 | 0.326 |
| 1391723_at   | BI291869 | Transcribed locus | --- | 0.950 | 0.830 | 0.670 | 0.005 | 1.291 | 0.161 | 0.849 | 0.050 |
| 1381644_at   | BE121056 | Transcribed locus | --- | 2.162 | 0.830 | 1.124 | 0.698 | 1.823 | 0.300 | 0.547 | 0.093 |
| 1389960_at   | BF390877 | Transcribed locus | --- | 1.171 | 0.830 | 1.385 | 0.700 | 0.769 | 0.156 | 1.153 | 0.433 |
| 1397028_at   | BF389733 | Transcribed locus | --- | 1.100 | 0.831 | 0.959 | 0.352 | 0.992 | 0.948 | 1.171 | 0.428 |
| 1391561_at   | BE108893 | Transcribed locus | --- | 1.194 | 0.831 | 1.625 | 0.550 | 1.020 | 0.259 | 1.051 | 0.856 |
| 1397204_s_at | BM385125 | Transcribed locus | --- | 1.225 | 0.831 | 1.118 | 0.073 | 1.172 | 0.536 | 1.043 | 0.100 |
| 1385875_at   | AA957617 | Transcribed locus | --- | 1.035 | 0.832 | 1.350 | 0.073 | 1.123 | 0.329 | 0.999 | 0.969 |
| 1389279_at   | BM386204 | Transcribed locus | --- | 0.681 | 0.832 | 1.238 | 0.110 | 0.604 | 0.200 | 1.131 | 0.108 |
| 1384243_at   | AI111413 | Transcribed locus | --- | 0.999 | 0.832 | 0.999 | 0.163 | 1.001 | 0.998 | 1.008 | 0.964 |
| 1380859_at   | AA891931 | Transcribed locus | --- | 1.002 | 0.834 | 0.785 | 0.022 | 0.654 | 0.020 | 0.853 | 0.289 |
| 1397615_at   | BG375528 | Transcribed locus | --- | 1.122 | 0.834 | 0.863 | 0.563 | 0.887 | 0.926 | 0.877 | 0.947 |
| 1392619_at   | BE118107 | Transcribed locus | --- | 1.083 | 0.835 | 0.938 | 0.991 | 1.434 | 0.084 | 1.179 | 0.307 |
| 1392190_at   | BF404047 | Transcribed locus | --- | 0.942 | 0.836 | 0.907 | 0.060 | 1.020 | 0.912 | 0.930 | 0.040 |
| 1392898_at   | AF011367 | Transcribed locus | --- | 0.969 | 0.836 | 0.777 | 0.023 | 0.816 | 0.409 | 0.775 | 0.028 |
| 1397178_at   | AA899041 | Transcribed locus | --- | 1.087 | 0.836 | 2.410 | 0.003 | 1.124 | 0.313 | 3.073 | 0.004 |
| 1395749_at   | BE104663 | Transcribed locus | --- | 1.178 | 0.837 | 1.302 | 0.226 | 1.488 | 0.236 | 1.065 | 0.809 |
| 1374992_at   | AI714115 | Transcribed locus | --- | 0.692 | 0.840 | 0.573 | 0.351 | 0.808 | 0.193 | 0.571 | 0.022 |
| 1379690_at   | BF420785 | Transcribed locus | --- | 1.261 | 0.840 | 0.939 | 0.713 | 0.875 | 0.349 | 0.473 | 0.524 |
| 1389097_at   | BI275857 | Transcribed locus | --- | 0.961 | 0.841 | 0.711 | 0.236 | 1.005 | 0.934 | 0.791 | 0.738 |
| 1371893_at   | BE111640 | Transcribed locus | --- | 1.223 | 0.842 | 0.612 | 0.001 | 1.253 | 0.051 | 0.735 | 0.004 |
| 1398731_at   | BF410569 | Transcribed locus | --- | 0.987 | 0.842 | 0.930 | 0.057 | 1.779 | 0.090 | 0.923 | 0.094 |
| 1390718_at   | BE096865 | Transcribed locus | --- | 0.924 | 0.843 | 1.061 | 0.707 | 1.028 | 0.100 | 1.088 | 0.257 |
| 1391814_at   | BI293690 | Transcribed locus | --- | 1.011 | 0.844 | 0.896 | 0.331 | 1.544 | 0.950 | 0.930 | 0.604 |
| 1397800_at   | BE106592 | Transcribed locus | --- | 1.153 | 0.844 | 1.219 | 0.681 | 1.794 | 0.427 | 2.347 | 0.091 |
| 1383611_at   | AI145497 | Transcribed locus | --- | 0.565 | 0.844 | 0.589 | 0.084 | 1.664 | 0.323 | 0.928 | 0.180 |
| 1396363_at   | BF399356 | Transcribed locus | --- | 0.932 | 0.845 | 1.147 | 0.397 | 3.660 | 0.003 | 3.119 | 0.013 |
| 1383518_at   | AI137914 | Transcribed locus | --- | 1.297 | 0.845 | 1.233 | 0.415 | 1.015 | 0.905 | 1.095 | 0.264 |
| 1391871_at   | AI763550 | Transcribed locus | --- | 1.031 | 0.845 | 0.457 | 0.005 | 0.792 | 0.105 | 0.275 | 0.025 |
| 1381324_at   | BM387030 | Transcribed locus | --- | 1.019 | 0.846 | 1.418 | 0.329 | 1.001 | 0.993 | 1.115 | 0.554 |
| 1372081_at   | BI299305 | Transcribed locus | --- | 0.930 | 0.847 | 0.526 | 0.018 | 1.359 | 0.989 | 0.687 | 0.012 |
| 1389721_at   | BI285940 | Transcribed locus | --- | 1.056 | 0.848 | 0.974 | 0.873 | 1.056 | 0.162 | 0.706 | 0.914 |
| 1396451_at   | BF393275 | Transcribed locus | --- | 1.176 | 0.848 | 0.527 | 0.014 | 1.367 | 0.829 | 0.564 | 0.029 |
| 1376141_at   | BF394672 | Transcribed locus | --- | 0.891 | 0.848 | 0.562 | 0.112 | 0.818 | 0.904 | 0.665 | 0.727 |
| 1395189_at   | BE111371 | Transcribed locus | --- | 0.951 | 0.850 | 0.673 | 0.013 | 1.739 | 0.184 | 0.519 | 0.007 |
| 1381296_at   | AA819045 | Transcribed locus | --- | 1.111 | 0.850 | 0.738 | 0.420 | 1.706 | 0.099 | 0.928 | 0.975 |
| 1398507_at   | BE108415 | Transcribed locus | --- | 0.983 | 0.851 | 0.475 | 0.023 | 0.973 | 0.770 | 0.506 | 0.029 |
| 1393334_at   | AW528448 | Transcribed locus | --- | 2.671 | 0.851 | 0.784 | 0.029 | 0.803 | 0.985 | 0.409 | 0.045 |
| 1375692_at   | AI229025 | Transcribed locus | --- | 0.768 | 0.851 | 1.042 | 0.832 | 0.561 | 0.156 | 0.789 | 0.040 |
| 1385905_at   | AI178616 | Transcribed locus | --- | 0.839 | 0.852 | 0.653 | 0.024 | 1.053 | 0.515 | 0.697 | 0.264 |
| 1377418_at   | AI411724 | Transcribed locus | --- | 0.985 | 0.852 | 0.968 | 0.544 | 0.997 | 0.059 | 1.236 | 0.026 |
| 1393391_at   | BF406888 | Transcribed locus | --- | 1.259 | 0.852 | 2.502 | 0.007 | 1.046 | 0.198 | 1.728 | 0.024 |
| 1375928_at   | BI285329 | Transcribed locus | --- | 1.213 | 0.853 | 1.703 | 0.006 | 0.868 | 0.660 | 1.615 | 0.061 |
| 1396743_at   | BF391580 | Transcribed locus | --- | 2.050 | 0.853 | 1.745 | 0.275 | 2.297 | 0.394 | 1.108 | 0.812 |
| 1395355_at   | AI555210 | Transcribed locus | --- | 0.965 | 0.854 | 0.317 | 0.001 | 1.059 | 0.745 | 0.636 | 0.006 |
| 1391851_at   | AI548705 | Transcribed locus | --- | 1.050 | 0.854 | 0.663 | 0.085 | 1.405 | 0.266 | 0.703 | 0.013 |
| 1385933_at   | AI709424 | Transcribed locus | --- | 1.274 | 0.855 | 1.222 | 0.086 | 1.026 | 0.700 | 0.972 | 0.861 |
| 1384934_at   | AA893454 | Transcribed locus | --- | 0.928 | 0.855 | 0.715 | 0.094 | 1.295 | 0.051 | 0.906 | 0.319 |
| 1381216_at   | BI294178 | Transcribed locus | --- | 0.945 | 0.856 | 1.080 | 0.301 | 1.016 | 0.340 | 1.115 | 0.117 |
| 1394256_at   | BG664811 | Transcribed locus | --- | 0.999 | 0.857 | 0.614 | 0.009 | 1.006 | 0.954 | 0.607 | 0.047 |
| 1395921_at   | BE097603 | Transcribed locus | --- | 0.958 | 0.857 | 0.462 | 0.017 | 0.911 | 0.696 | 0.473 | 0.005 |
| 1392615_at   | AI454224 | Transcribed locus | --- | 0.972 | 0.859 | 1.625 | 0.043 | 0.874 | 0.246 | 1.655 | 0.102 |
| 1384897_at   | AA858696 | Transcribed locus | --- | 0.984 | 0.860 | 0.683 | 0.094 | 1.031 | 0.702 | 0.677 | 0.318 |
| 1392025_x_at | BI303277 | Transcribed locus | --- | 1.080 | 0.861 | 1.086 | 0.225 | 1.148 | 0.095 | 1.095 | 0.168 |
| 1388520_at   | BI278854 | Transcribed locus | --- | 1.266 | 0.861 | 0.378 | 0.000 | 0.813 | 0.479 | 0.588 | 0.003 |
| 1378202_at   | BE106504 | Transcribed locus | --- | 0.997 | 0.862 | 1.010 | 0.914 | 0.992 | 0.984 | 1.008 | 0.991 |
| 1378315_at   | AI045116 | Transcribed locus | --- | 1.436 | 0.863 | 1.221 | 0.403 | 1.019 | 0.986 | 1.429 | 0.098 |
| 1382212_at   | AI385201 | Transcribed locus | --- | 1.055 | 0.863 | 0.985 | 0.774 | 1.224 | 0.080 | 0.692 | 0.613 |
| 1374648_at   | BM390626 | Transcribed locus | --- | 1.000 | 0.863 | 0.093 | 0.001 | 0.996 | 0.918 | 0.093 | 0.000 |
| 1395381_at   | BF542239 | Transcribed locus | --- | 1.016 | 0.864 | 1.179 | 0.106 | 1.134 | 0.515 | 1.072 | 0.075 |

|              |          |                   |     |       |       |       |       |       |       |       |       |
|--------------|----------|-------------------|-----|-------|-------|-------|-------|-------|-------|-------|-------|
| 1393119_at   | BM388725 | Transcribed locus | --- | 1.004 | 0.864 | 8.035 | 0.000 | 0.545 | 0.007 | 6.812 | 0.004 |
| 1373007_at   | BF417885 | Transcribed locus | --- | 1.091 | 0.864 | 0.933 | 0.734 | 1.186 | 0.414 | 1.158 | 0.066 |
| 1397080_at   | BM390517 | Transcribed locus | --- | 0.897 | 0.865 | 0.833 | 0.085 | 1.057 | 0.870 | 0.664 | 0.029 |
| 1392774_at   | BF284310 | Transcribed locus | --- | 0.847 | 0.865 | 0.611 | 0.003 | 0.845 | 0.113 | 0.737 | 0.064 |
| 1392118_at   | BE099845 | Transcribed locus | --- | 0.837 | 0.866 | 0.426 | 0.003 | 0.790 | 0.400 | 0.317 | 0.014 |
| 1393025_at   | BI297354 | Transcribed locus | --- | 0.988 | 0.866 | 0.833 | 0.346 | 0.961 | 0.930 | 0.820 | 0.074 |
| 1395022_at   | AA859303 | Transcribed locus | --- | 1.091 | 0.866 | 0.712 | 0.906 | 1.340 | 0.026 | 1.110 | 0.606 |
| 1379205_at   | BG374111 | Transcribed locus | --- | 1.082 | 0.867 | 1.581 | 0.987 | 1.111 | 0.704 | 1.273 | 0.960 |
| 1381335_at   | BE349658 | Transcribed locus | --- | 0.928 | 0.869 | 0.985 | 0.068 | 1.224 | 0.075 | 1.075 | 0.113 |
| 1374216_at   | BI280277 | Transcribed locus | --- | 0.897 | 0.869 | 1.714 | 0.067 | 1.264 | 0.257 | 0.825 | 0.113 |
| 1376750_at   | AA963477 | Transcribed locus | --- | 1.552 | 0.869 | 0.601 | 0.417 | 1.682 | 0.266 | 0.999 | 0.999 |
| 1391514_at   | AI575440 | Transcribed locus | --- | 1.130 | 0.869 | 0.813 | 0.378 | 0.820 | 0.046 | 1.094 | 0.444 |
| 1383809_at   | BF562237 | Transcribed locus | --- | 0.952 | 0.871 | 0.538 | 0.081 | 1.143 | 0.289 | 0.830 | 0.076 |
| 1382575_at   | BE118546 | Transcribed locus | --- | 0.847 | 0.871 | 1.101 | 0.295 | 0.713 | 0.739 | 1.248 | 0.084 |
| 1395674_at   | BF408259 | Transcribed locus | --- | 1.155 | 0.871 | 0.362 | 0.005 | 0.932 | 0.855 | 0.451 | 0.051 |
| 1396603_at   | BF406214 | Transcribed locus | --- | 1.166 | 0.872 | 0.879 | 0.232 | 0.936 | 0.771 | 1.410 | 0.969 |
| 1397173_at   | BE109095 | Transcribed locus | --- | 0.974 | 0.873 | 0.320 | 0.035 | 0.968 | 0.860 | 0.367 | 0.002 |
| 1372851_at   | AI412931 | Transcribed locus | --- | 1.052 | 0.873 | 0.809 | 0.476 | 1.407 | 0.688 | 0.447 | 0.765 |
| 1380057_at   | BE097091 | Transcribed locus | --- | 1.009 | 0.873 | 0.946 | 0.963 | 1.009 | 0.344 | 1.014 | 0.871 |
| 1383063_a_at | AI137878 | Transcribed locus | --- | 1.012 | 0.876 | 0.961 | 0.236 | 1.877 | 0.105 | 1.174 | 0.947 |
| 1397434_at   | BF399188 | Transcribed locus | --- | 1.185 | 0.877 | 0.973 | 0.398 | 1.274 | 0.341 | 0.780 | 0.580 |
| 1378208_at   | BE099836 | Transcribed locus | --- | 0.981 | 0.877 | 0.999 | 0.970 | 0.976 | 0.368 | 0.968 | 0.999 |
| 1394990_at   | BI301740 | Transcribed locus | --- | 1.152 | 0.877 | 1.025 | 0.149 | 1.506 | 0.202 | 1.271 | 0.360 |
| 1381225_at   | BE119934 | Transcribed locus | --- | 1.014 | 0.877 | 0.241 | 0.001 | 1.000 | 0.449 | 0.240 | 0.000 |
| 1377747_at   | BE116029 | Transcribed locus | --- | 0.865 | 0.879 | 0.791 | 0.516 | 1.019 | 0.261 | 0.802 | 0.144 |
| 1383293_at   | BG669441 | Transcribed locus | --- | 1.075 | 0.880 | 0.832 | 0.170 | 1.111 | 0.783 | 0.830 | 0.047 |
| 1390177_at   | AI233857 | Transcribed locus | --- | 1.001 | 0.880 | 0.894 | 0.341 | 0.780 | 0.672 | 1.008 | 0.406 |
| 1381613_at   | BI290213 | Transcribed locus | --- | 0.906 | 0.881 | 1.083 | 0.146 | 1.362 | 0.800 | 1.107 | 0.996 |
| 1381402_at   | BE108294 | Transcribed locus | --- | 1.108 | 0.881 | 0.962 | 0.843 | 1.340 | 0.413 | 1.038 | 0.685 |
| 1394996_at   | BF390127 | Transcribed locus | --- | 0.585 | 0.881 | 0.754 | 0.460 | 1.051 | 0.648 | 0.795 | 0.192 |
| 1373677_at   | AI598315 | Transcribed locus | --- | 1.380 | 0.881 | 1.458 | 0.326 | 1.902 | 0.072 | 0.875 | 0.346 |
| 1383201_at   | BI289300 | Transcribed locus | --- | 1.071 | 0.881 | 0.432 | 0.003 | 1.026 | 0.998 | 0.475 | 0.025 |
| 1396623_at   | BF399568 | Transcribed locus | --- | 0.981 | 0.881 | 1.033 | 0.587 | 1.083 | 0.779 | 1.127 | 0.510 |
| 1384164_at   | BF290416 | Transcribed locus | --- | 0.849 | 0.882 | 1.265 | 0.163 | 1.505 | 0.048 | 1.028 | 0.099 |
| 1378009_at   | BF282481 | Transcribed locus | --- | 1.063 | 0.882 | 1.030 | 0.788 | 0.550 | 0.012 | 1.113 | 0.634 |
| 1392497_at   | BE104938 | Transcribed locus | --- | 0.932 | 0.882 | 0.567 | 0.007 | 0.998 | 0.663 | 0.763 | 0.042 |
| 1391591_at   | AW532531 | Transcribed locus | --- | 1.027 | 0.882 | 0.845 | 0.725 | 1.186 | 0.186 | 1.096 | 0.246 |
| 1397195_at   | AI110520 | Transcribed locus | --- | 1.092 | 0.882 | 0.997 | 0.678 | 0.958 | 0.828 | 0.629 | 0.200 |
| 1381591_at   | BI302903 | Transcribed locus | --- | 0.935 | 0.882 | 0.501 | 0.027 | 0.465 | 0.135 | 0.513 | 0.064 |
| 1382628_at   | BE111904 | Transcribed locus | --- | 0.895 | 0.882 | 0.484 | 0.051 | 0.790 | 0.432 | 0.373 | 0.005 |
| 1374336_at   | AI409666 | Transcribed locus | --- | 1.128 | 0.884 | 1.115 | 0.473 | 1.019 | 0.658 | 1.128 | 0.707 |
| 1389285_at   | AI229933 | Transcribed locus | --- | 1.000 | 0.884 | 0.138 | 0.013 | 0.992 | 0.056 | 0.163 | 0.004 |
| 1374324_at   | AA945828 | Transcribed locus | --- | 0.966 | 0.884 | 0.686 | 0.096 | 0.822 | 0.189 | 0.752 | 0.033 |
| 1382983_at   | AI136134 | Transcribed locus | --- | 1.185 | 0.885 | 0.907 | 0.777 | 2.110 | 0.073 | 1.220 | 0.523 |
| 1394898_at   | BF286853 | Transcribed locus | --- | 0.971 | 0.885 | 0.971 | 0.600 | 1.710 | 0.063 | 0.935 | 0.441 |
| 1383557_at   | BG665587 | Transcribed locus | --- | 1.424 | 0.885 | 0.644 | 0.120 | 1.378 | 0.740 | 0.740 | 0.113 |
| 1381990_at   | AA963979 | Transcribed locus | --- | 0.937 | 0.886 | 0.831 | 0.524 | 0.937 | 0.932 | 0.776 | 0.286 |
| 1398072_at   | BF409833 | Transcribed locus | --- | 3.074 | 0.886 | 1.276 | 0.950 | 1.545 | 0.617 | 1.459 | 0.817 |
| 1392187_at   | BG371676 | Transcribed locus | --- | 0.998 | 0.887 | 1.002 | 0.853 | 1.003 | 0.999 | 1.001 | 0.964 |
| 1376433_at   | BF400033 | Transcribed locus | --- | 0.764 | 0.887 | 0.973 | 0.924 | 0.966 | 0.987 | 1.036 | 0.891 |
| 1385442_at   | AW529552 | Transcribed locus | --- | 1.046 | 0.887 | 0.362 | 0.000 | 0.803 | 0.934 | 0.248 | 0.055 |
| 1384001_at   | AW143174 | Transcribed locus | --- | 1.064 | 0.888 | 1.656 | 0.060 | 0.771 | 0.450 | 1.516 | 0.015 |
| 1385584_at   | AI111406 | Transcribed locus | --- | 0.970 | 0.888 | 1.223 | 0.901 | 0.796 | 0.410 | 0.821 | 0.767 |
| 1383133_at   | BI295765 | Transcribed locus | --- | 0.962 | 0.888 | 0.774 | 0.112 | 1.033 | 0.871 | 0.555 | 0.017 |
| 1389541_at   | AI410836 | Transcribed locus | --- | 1.150 | 0.888 | 1.181 | 0.102 | 0.747 | 0.092 | 1.131 | 0.848 |
| 1382477_at   | AW532560 | Transcribed locus | --- | 1.010 | 0.888 | 1.292 | 0.012 | 1.003 | 0.154 | 1.068 | 0.063 |
| 1381655_at   | BE102083 | Transcribed locus | --- | 0.559 | 0.889 | 0.515 | 0.051 | 1.492 | 0.509 | 0.580 | 0.234 |
| 1392246_at   | AA900645 | Transcribed locus | --- | 0.889 | 0.890 | 0.695 | 0.127 | 0.746 | 0.329 | 0.671 | 0.081 |
| 1395390_at   | BM384238 | Transcribed locus | --- | 1.029 | 0.890 | 0.991 | 0.944 | 0.993 | 0.960 | 0.994 | 0.996 |
| 1376096_a_at | BE108246 | Transcribed locus | --- | 0.980 | 0.891 | 0.990 | 0.972 | 1.425 | 0.043 | 1.004 | 0.400 |
| 1380935_at   | AI179379 | Transcribed locus | --- | 1.003 | 0.893 | 1.701 | 0.085 | 1.068 | 0.778 | 1.071 | 0.272 |

|              |          |                   |     |       |       |       |       |       |       |       |       |
|--------------|----------|-------------------|-----|-------|-------|-------|-------|-------|-------|-------|-------|
| 1389442_at   | AI406804 | Transcribed locus | --- | 0.978 | 0.894 | 0.563 | 0.013 | 0.612 | 0.930 | 0.679 | 0.085 |
| 1385924_at   | AI454060 | Transcribed locus | --- | 0.816 | 0.895 | 0.443 | 0.033 | 0.894 | 0.417 | 0.427 | 0.014 |
| 1384093_at   | AW523562 | Transcribed locus | --- | 1.033 | 0.895 | 1.741 | 0.358 | 1.004 | 0.910 | 1.259 | 0.314 |
| 1380886_at   | AI145907 | Transcribed locus | --- | 0.856 | 0.895 | 1.124 | 0.041 | 0.717 | 0.642 | 0.778 | 0.295 |
| 1375293_at   | BE107875 | Transcribed locus | --- | 0.992 | 0.896 | 0.991 | 0.627 | 1.016 | 0.993 | 0.994 | 0.991 |
| 1376266_at   | AA819086 | Transcribed locus | --- | 1.002 | 0.896 | 1.035 | 0.881 | 1.006 | 0.993 | 0.934 | 0.995 |
| 1383192_at   | BI289990 | Transcribed locus | --- | 1.008 | 0.897 | 0.876 | 0.773 | 1.014 | 0.900 | 0.954 | 0.506 |
| 1374180_at   | AI236753 | Transcribed locus | --- | 0.962 | 0.898 | 1.755 | 0.002 | 0.901 | 0.580 | 1.647 | 0.015 |
| 1398369_at   | AI599048 | Transcribed locus | --- | 1.001 | 0.898 | 0.502 | 0.006 | 0.923 | 0.170 | 0.799 | 0.154 |
| 1393428_at   | BF398638 | Transcribed locus | --- | 1.003 | 0.898 | 1.183 | 0.593 | 0.975 | 0.434 | 0.544 | 0.078 |
| 1383889_at   | AI511225 | Transcribed locus | --- | 0.882 | 0.898 | 1.811 | 0.082 | 0.627 | 0.030 | 1.481 | 0.309 |
| 1375953_at   | AI012884 | Transcribed locus | --- | 0.980 | 0.898 | 1.064 | 0.898 | 1.022 | 0.048 | 0.993 | 0.823 |
| 1378580_at   | AI007848 | Transcribed locus | --- | 1.104 | 0.898 | 0.346 | 0.014 | 0.974 | 0.775 | 0.303 | 0.000 |
| 1396600_at   | BF393953 | Transcribed locus | --- | 0.810 | 0.899 | 0.719 | 0.079 | 0.919 | 0.250 | 0.612 | 0.503 |
| 1391479_at   | BE107968 | Transcribed locus | --- | 1.032 | 0.899 | 0.331 | 0.042 | 1.028 | 0.703 | 0.347 | 0.047 |
| 1384790_at   | BF388025 | Transcribed locus | --- | 0.998 | 0.899 | 1.002 | 0.976 | 1.011 | 0.970 | 0.996 | 0.997 |
| 1393432_a_at | AA899840 | Transcribed locus | --- | 1.006 | 0.900 | 0.374 | 0.000 | 0.961 | 0.996 | 0.510 | 0.013 |
| 1374754_at   | BF400833 | Transcribed locus | --- | 0.955 | 0.900 | 1.265 | 0.091 | 1.220 | 0.783 | 0.983 | 0.437 |
| 1377946_at   | BF420043 | Transcribed locus | --- | 1.013 | 0.901 | 0.999 | 0.958 | 0.952 | 0.682 | 0.951 | 0.603 |
| 1374537_at   | AI406533 | Transcribed locus | --- | 0.959 | 0.901 | 0.675 | 0.109 | 1.007 | 0.922 | 0.527 | 0.017 |
| 1385068_at   | BF397283 | Transcribed locus | --- | 0.730 | 0.902 | 0.450 | 0.074 | 1.002 | 0.874 | 0.496 | 0.044 |
| 1383105_at   | BI293339 | Transcribed locus | --- | 1.038 | 0.903 | 1.108 | 0.955 | 1.022 | 0.804 | 0.885 | 0.133 |
| 1385798_at   | AW533857 | Transcribed locus | --- | 0.987 | 0.904 | 0.325 | 0.004 | 0.959 | 0.992 | 0.585 | 0.071 |
| 1372783_at   | BM387109 | Transcribed locus | --- | 0.979 | 0.904 | 0.742 | 0.035 | 0.905 | 0.758 | 0.776 | 0.001 |
| 1383850_at   | BF548042 | Transcribed locus | --- | 0.936 | 0.904 | 1.559 | 0.228 | 0.940 | 0.878 | 1.146 | 0.282 |
| 1397472_at   | AI454728 | Transcribed locus | --- | 1.290 | 0.904 | 1.122 | 0.399 | 1.217 | 0.591 | 1.054 | 0.254 |
| 1389554_at   | AA956784 | Transcribed locus | --- | 1.181 | 0.905 | 0.947 | 0.283 | 1.060 | 0.153 | 1.227 | 0.132 |
| 1393703_at   | BI288832 | Transcribed locus | --- | 0.991 | 0.906 | 1.019 | 0.987 | 0.979 | 0.833 | 1.023 | 0.937 |
| 1391708_at   | BE096515 | Transcribed locus | --- | 1.045 | 0.906 | 1.095 | 0.428 | 0.997 | 0.847 | 1.118 | 0.858 |
| 1373385_at   | BF550271 | Transcribed locus | --- | 1.009 | 0.906 | 1.474 | 0.016 | 0.996 | 0.895 | 1.279 | 0.143 |
| 1380471_at   | H31701   | Transcribed locus | --- | 0.838 | 0.907 | 0.601 | 0.088 | 0.512 | 0.057 | 0.486 | 0.018 |
| 1385002_at   | AI454867 | Transcribed locus | --- | 0.960 | 0.907 | 1.184 | 0.063 | 0.963 | 0.934 | 1.709 | 0.072 |
| 1379511_at   | AA875275 | Transcribed locus | --- | 0.961 | 0.908 | 1.035 | 0.089 | 1.161 | 0.595 | 0.617 | 0.041 |
| 1377781_at   | AA899278 | Transcribed locus | --- | 0.960 | 0.908 | 0.350 | 0.018 | 0.955 | 0.295 | 0.419 | 0.003 |
| 1383385_at   | AI136674 | Transcribed locus | --- | 0.981 | 0.908 | 0.574 | 0.063 | 0.997 | 0.851 | 0.833 | 0.329 |
| 1375358_at   | AA998150 | Transcribed locus | --- | 1.024 | 0.908 | 1.684 | 0.050 | 0.690 | 0.068 | 1.772 | 0.110 |
| 1375698_at   | BG372400 | Transcribed locus | --- | 1.066 | 0.908 | 1.001 | 0.960 | 0.994 | 0.992 | 1.020 | 0.564 |
| 1394627_at   | AW527508 | Transcribed locus | --- | 0.878 | 0.908 | 0.817 | 0.778 | 0.998 | 0.974 | 0.999 | 0.777 |
| 1381608_at   | BF394383 | Transcribed locus | --- | 0.968 | 0.908 | 1.091 | 0.967 | 0.972 | 0.900 | 1.014 | 0.906 |
| 1380997_at   | BE103561 | Transcribed locus | --- | 0.990 | 0.909 | 1.418 | 0.122 | 1.270 | 0.689 | 1.115 | 0.271 |
| 1378863_at   | BF412077 | Transcribed locus | --- | 0.986 | 0.909 | 0.749 | 0.107 | 1.514 | 0.090 | 0.639 | 0.073 |
| 1393211_at   | AW144047 | Transcribed locus | --- | 0.915 | 0.910 | 0.775 | 0.541 | 1.104 | 0.793 | 0.780 | 0.543 |
| 1399015_at   | BI281753 | Transcribed locus | --- | 0.719 | 0.910 | 0.874 | 0.014 | 0.773 | 0.748 | 0.784 | 0.052 |
| 1394818_at   | AI176867 | Transcribed locus | --- | 1.223 | 0.910 | 0.482 | 0.028 | 0.916 | 0.453 | 0.515 | 0.003 |
| 1371689_at   | BE107334 | Transcribed locus | --- | 1.006 | 0.910 | 1.071 | 0.821 | 0.973 | 0.497 | 0.935 | 0.093 |
| 1397930_at   | BE104754 | Transcribed locus | --- | 1.015 | 0.912 | 1.000 | 0.924 | 0.963 | 0.856 | 1.471 | 0.694 |
| 1378440_at   | BM385137 | Transcribed locus | --- | 1.405 | 0.912 | 0.850 | 0.332 | 1.350 | 0.376 | 1.146 | 0.472 |
| 1382299_at   | AW914657 | Transcribed locus | --- | 1.011 | 0.913 | 1.120 | 0.996 | 1.051 | 0.985 | 1.117 | 0.391 |
| 1376031_at   | BE099769 | Transcribed locus | --- | 0.739 | 0.913 | 1.014 | 0.807 | 0.858 | 0.210 | 1.187 | 0.031 |
| 1398545_at   | BI288876 | Transcribed locus | --- | 1.002 | 0.913 | 0.997 | 0.855 | 1.013 | 0.060 | 0.996 | 0.733 |
| 1389304_at   | AI176323 | Transcribed locus | --- | 0.950 | 0.913 | 1.729 | 0.123 | 1.492 | 0.704 | 0.978 | 0.851 |
| 1388656_at   | BI294968 | Transcribed locus | --- | 0.947 | 0.914 | 0.580 | 0.009 | 0.949 | 0.453 | 0.727 | 0.009 |
| 1385720_at   | AW533911 | Transcribed locus | --- | 1.074 | 0.915 | 1.345 | 0.357 | 1.555 | 0.494 | 1.488 | 0.189 |
| 1372392_at   | AI599125 | Transcribed locus | --- | 1.610 | 0.915 | 1.512 | 0.084 | 0.848 | 0.689 | 1.941 | 0.050 |
| 1394390_at   | BF394739 | Transcribed locus | --- | 0.840 | 0.915 | 0.962 | 0.753 | 0.711 | 0.111 | 0.951 | 0.061 |
| 1382846_at   | AI501459 | Transcribed locus | --- | 0.977 | 0.915 | 1.545 | 0.028 | 0.655 | 0.059 | 1.711 | 0.138 |
| 1376543_at   | BF404136 | Transcribed locus | --- | 0.966 | 0.915 | 0.883 | 0.159 | 1.104 | 0.593 | 0.981 | 0.878 |
| 1372489_at   | AI172498 | Transcribed locus | --- | 0.910 | 0.916 | 0.448 | 0.010 | 0.820 | 0.069 | 0.669 | 0.000 |
| 1378110_at   | AI412190 | Transcribed locus | --- | 0.594 | 0.916 | 1.510 | 0.032 | 0.586 | 0.576 | 1.266 | 0.061 |
| 1388916_at   | BE109616 | Transcribed locus | --- | 0.924 | 0.916 | 0.556 | 0.179 | 2.070 | 0.074 | 1.180 | 0.313 |
| 1392668_at   | AI235429 | Transcribed locus | --- | 1.870 | 0.916 | 1.369 | 0.483 | 0.898 | 0.880 | 1.111 | 0.928 |

|              |          |                   |     |       |       |       |       |       |       |       |       |
|--------------|----------|-------------------|-----|-------|-------|-------|-------|-------|-------|-------|-------|
| 1374089_at   | BI289692 | Transcribed locus | --- | 1.181 | 0.917 | 0.713 | 0.015 | 1.152 | 0.460 | 0.774 | 0.065 |
| 1390609_at   | BI296683 | Transcribed locus | --- | 1.021 | 0.918 | 0.621 | 0.024 | 0.738 | 0.583 | 1.206 | 0.702 |
| 1383470_at   | AI548857 | Transcribed locus | --- | 1.064 | 0.918 | 0.917 | 0.978 | 1.042 | 0.528 | 1.039 | 0.204 |
| 1393938_at   | AI501880 | Transcribed locus | --- | 0.887 | 0.919 | 0.982 | 0.353 | 0.881 | 0.699 | 0.747 | 0.032 |
| 1373765_at   | BG371708 | Transcribed locus | --- | 0.950 | 0.919 | 0.410 | 0.042 | 0.985 | 0.943 | 0.592 | 0.004 |
| 1389649_at   | AI411897 | Transcribed locus | --- | 1.056 | 0.919 | 0.408 | 0.015 | 1.046 | 0.996 | 0.395 | 0.019 |
| 1375369_at   | Z83035   | Transcribed locus | --- | 1.060 | 0.922 | 1.224 | 0.404 | 1.069 | 0.378 | 1.107 | 0.207 |
| 1383636_at   | AA997509 | Transcribed locus | --- | 0.708 | 0.923 | 0.697 | 0.051 | 0.802 | 0.313 | 0.626 | 0.046 |
| 1383027_at   | AA900262 | Transcribed locus | --- | 1.256 | 0.924 | 1.397 | 0.881 | 1.483 | 0.121 | 1.740 | 0.579 |
| 1377737_at   | BE098874 | Transcribed locus | --- | 0.948 | 0.925 | 1.146 | 0.077 | 1.133 | 0.073 | 1.280 | 0.066 |
| 1388585_at   | BF281959 | Transcribed locus | --- | 0.891 | 0.925 | 0.944 | 0.679 | 1.093 | 0.819 | 1.119 | 0.787 |
| 1392529_at   | BI294478 | Transcribed locus | --- | 0.749 | 0.925 | 1.278 | 0.109 | 0.753 | 0.111 | 1.027 | 0.836 |
| 1398047_at   | BF394787 | Transcribed locus | --- | 0.977 | 0.926 | 0.295 | 0.001 | 1.541 | 0.187 | 0.348 | 0.014 |
| 1392893_a_at | AA926239 | Transcribed locus | --- | 1.070 | 0.926 | 0.831 | 0.613 | 1.125 | 0.213 | 1.065 | 0.225 |
| 1379898_at   | AI030607 | Transcribed locus | --- | 0.999 | 0.926 | 1.221 | 0.994 | 0.781 | 0.581 | 1.535 | 0.143 |
| 1381017_at   | AA925043 | Transcribed locus | --- | 1.019 | 0.926 | 1.254 | 0.324 | 0.919 | 0.942 | 0.986 | 0.344 |
| 1375233_at   | BI296668 | Transcribed locus | --- | 1.010 | 0.926 | 1.319 | 0.084 | 1.002 | 0.975 | 1.084 | 0.230 |
| 1382706_at   | AI501895 | Transcribed locus | --- | 1.034 | 0.927 | 1.303 | 0.251 | 0.762 | 0.229 | 1.128 | 0.663 |
| 1395362_at   | BG670699 | Transcribed locus | --- | 1.005 | 0.927 | 0.468 | 0.025 | 1.016 | 0.973 | 0.899 | 0.146 |
| 1383164_at   | AW524366 | Transcribed locus | --- | 0.986 | 0.927 | 0.371 | 0.005 | 0.676 | 0.038 | 0.431 | 0.032 |
| 1377957_at   | AI716128 | Transcribed locus | --- | 0.955 | 0.927 | 0.209 | 0.011 | 1.031 | 0.935 | 0.409 | 0.073 |
| 1374606_at   | BF283073 | Transcribed locus | --- | 0.835 | 0.928 | 0.736 | 0.041 | 0.716 | 0.313 | 0.631 | 0.019 |
| 1379680_at   | AI030284 | Transcribed locus | --- | 0.783 | 0.929 | 1.019 | 0.971 | 0.922 | 0.688 | 0.809 | 0.105 |
| 1384189_at   | AI045368 | Transcribed locus | --- | 0.663 | 0.929 | 0.718 | 0.177 | 1.184 | 0.703 | 0.990 | 0.120 |
| 1377661_at   | AW524539 | Transcribed locus | --- | 0.830 | 0.930 | 0.832 | 0.102 | 0.627 | 0.036 | 0.843 | 0.056 |
| 1388737_at   | AI410799 | Transcribed locus | --- | 1.000 | 0.931 | 0.820 | 0.029 | 1.141 | 0.108 | 1.080 | 0.641 |
| 1391146_at   | BE111632 | Transcribed locus | --- | 1.174 | 0.931 | 0.998 | 0.904 | 0.805 | 0.381 | 0.930 | 0.976 |
| 1385032_at   | BE114028 | Transcribed locus | --- | 0.985 | 0.931 | 0.694 | 0.164 | 1.001 | 0.995 | 0.688 | 0.166 |
| 1374144_at   | BF402375 | Transcribed locus | --- | 0.868 | 0.932 | 0.644 | 0.060 | 0.713 | 0.104 | 0.711 | 0.052 |
| 1372191_at   | BI303656 | Transcribed locus | --- | 0.975 | 0.933 | 1.716 | 0.119 | 0.918 | 0.283 | 1.091 | 0.163 |
| 1392039_at   | AI007657 | Transcribed locus | --- | 0.963 | 0.933 | 1.259 | 0.813 | 1.003 | 0.244 | 0.703 | 0.375 |
| 1380069_at   | BF389717 | Transcribed locus | --- | 1.066 | 0.935 | 0.415 | 0.001 | 1.251 | 0.052 | 0.474 | 0.008 |
| 1382844_at   | AA819037 | Transcribed locus | --- | 0.991 | 0.935 | 0.999 | 0.971 | 1.111 | 0.964 | 0.795 | 0.998 |
| 1374168_at   | BE099608 | Transcribed locus | --- | 0.923 | 0.936 | 0.496 | 0.002 | 1.253 | 0.039 | 0.704 | 0.049 |
| 1379149_at   | BF404318 | Transcribed locus | --- | 1.019 | 0.936 | 0.993 | 0.675 | 0.945 | 0.487 | 1.000 | 0.994 |
| 1380699_at   | BE110761 | Transcribed locus | --- | 1.101 | 0.936 | 1.540 | 0.212 | 1.472 | 0.085 | 1.012 | 0.982 |
| 1380214_at   | BE118929 | Transcribed locus | --- | 1.011 | 0.936 | 0.979 | 0.112 | 1.007 | 0.877 | 1.029 | 0.949 |
| 1394636_at   | BM385501 | Transcribed locus | --- | 1.009 | 0.937 | 0.625 | 0.183 | 1.003 | 0.993 | 0.983 | 0.826 |
| 1394589_at   | AA892134 | Transcribed locus | --- | 1.024 | 0.937 | 0.304 | 0.077 | 1.706 | 0.868 | 1.162 | 0.562 |
| 1380433_at   | AI229240 | Transcribed locus | --- | 1.031 | 0.938 | 0.977 | 0.982 | 0.838 | 0.385 | 0.862 | 0.252 |
| 1386178_at   | AA799690 | Transcribed locus | --- | 0.994 | 0.939 | 0.484 | 0.028 | 0.951 | 0.991 | 0.415 | 0.058 |
| 1384554_at   | AI058725 | Transcribed locus | --- | 1.002 | 0.939 | 1.001 | 0.810 | 1.004 | 0.887 | 1.003 | 0.982 |
| 1374094_at   | BF408129 | Transcribed locus | --- | 0.981 | 0.939 | 1.028 | 0.591 | 1.379 | 0.115 | 0.866 | 0.391 |
| 1376295_at   | BE119676 | Transcribed locus | --- | 1.049 | 0.940 | 1.007 | 0.991 | 1.008 | 0.967 | 1.314 | 0.115 |
| 1381292_at   | BE095785 | Transcribed locus | --- | 0.991 | 0.940 | 1.009 | 0.747 | 1.027 | 0.206 | 1.000 | 0.920 |
| 1381803_at   | BE110472 | Transcribed locus | --- | 1.000 | 0.940 | 1.000 | 0.923 | 0.974 | 0.988 | 1.004 | 0.912 |
| 1393574_at   | AI103347 | Transcribed locus | --- | 0.981 | 0.940 | 1.248 | 0.314 | 1.592 | 0.127 | 1.081 | 0.313 |
| 1398050_at   | BI300450 | Transcribed locus | --- | 0.995 | 0.941 | 0.962 | 0.688 | 1.636 | 0.052 | 0.988 | 0.990 |
| 1380880_at   | AA900583 | Transcribed locus | --- | 1.016 | 0.942 | 1.132 | 0.109 | 1.740 | 0.162 | 1.104 | 0.056 |
| 1375972_at   | AA851327 | Transcribed locus | --- | 1.203 | 0.942 | 1.470 | 0.080 | 1.164 | 0.586 | 0.954 | 0.414 |
| 1390497_at   | AI175594 | Transcribed locus | --- | 0.958 | 0.942 | 1.616 | 0.008 | 1.039 | 0.816 | 1.495 | 0.064 |
| 1376376_at   | AI501923 | Transcribed locus | --- | 1.160 | 0.942 | 0.606 | 0.001 | 1.345 | 0.137 | 0.915 | 0.132 |
| 1396968_at   | BF404591 | Transcribed locus | --- | 1.044 | 0.943 | 1.104 | 0.986 | 1.024 | 0.950 | 1.138 | 0.530 |
| 1379336_at   | BF289150 | Transcribed locus | --- | 1.266 | 0.943 | 1.676 | 0.045 | 5.082 | 0.009 | 3.342 | 0.002 |
| 1393059_at   | AI137360 | Transcribed locus | --- | 1.015 | 0.944 | 0.901 | 0.929 | 0.997 | 0.993 | 0.936 | 0.997 |
| 1380588_at   | AI511180 | Transcribed locus | --- | 1.002 | 0.945 | 0.804 | 0.134 | 1.006 | 0.968 | 1.372 | 0.131 |
| 1385760_at   | BF400633 | Transcribed locus | --- | 1.013 | 0.945 | 0.989 | 0.703 | 1.030 | 0.463 | 1.098 | 0.431 |
| 1379350_at   | AI179648 | Transcribed locus | --- | 1.015 | 0.945 | 0.955 | 0.184 | 0.789 | 0.663 | 0.677 | 0.028 |
| 1374395_at   | AI102825 | Transcribed locus | --- | 1.019 | 0.945 | 1.446 | 0.016 | 0.755 | 0.005 | 1.508 | 0.048 |
| 1396779_at   | BF402702 | Transcribed locus | --- | 0.977 | 0.945 | 1.479 | 0.062 | 0.869 | 0.839 | 0.976 | 0.942 |
| 1389592_at   | AI317817 | Transcribed locus | --- | 0.920 | 0.946 | 2.678 | 0.069 | 0.995 | 0.886 | 1.995 | 0.138 |



|            |          |                   |     |       |       |       |       |       |       |       |       |
|------------|----------|-------------------|-----|-------|-------|-------|-------|-------|-------|-------|-------|
| 1382681_at | AA899948 | Transcribed locus | --- | 1.027 | 0.946 | 1.232 | 0.651 | 1.174 | 0.582 | 0.802 | 0.325 |
| 1386043_at | BF289242 | Transcribed locus | --- | 1.009 | 0.948 | 1.034 | 0.628 | 1.012 | 0.943 | 0.935 | 0.500 |
| 1397248_at | AI547500 | Transcribed locus | --- | 0.993 | 0.948 | 0.985 | 0.633 | 0.997 | 0.993 | 0.983 | 0.975 |
| 1373396_at | BF283617 | Transcribed locus | --- | 0.789 | 0.948 | 1.015 | 0.150 | 0.927 | 0.711 | 0.872 | 0.823 |
| 1381079_at | BF411725 | Transcribed locus | --- | 1.007 | 0.949 | 1.075 | 0.361 | 0.997 | 0.993 | 1.057 | 0.906 |
| 1379187_at | BF418643 | Transcribed locus | --- | 0.998 | 0.949 | 0.997 | 0.985 | 1.002 | 0.980 | 1.068 | 0.587 |
| 1391563_at | AA963184 | Transcribed locus | --- | 1.415 | 0.950 | 0.659 | 0.161 | 1.323 | 0.494 | 0.442 | 0.145 |
| 1390845_at | AI179288 | Transcribed locus | --- | 1.003 | 0.950 | 1.018 | 0.867 | 1.004 | 0.979 | 1.399 | 0.012 |
| 1374268_at | AA859010 | Transcribed locus | --- | 1.005 | 0.950 | 0.487 | 0.097 | 0.999 | 0.969 | 0.519 | 0.090 |
| 1375000_at | BF415422 | Transcribed locus | --- | 0.865 | 0.950 | 0.432 | 0.000 | 0.926 | 0.554 | 0.476 | 0.003 |
| 1395831_at | BF288661 | Transcribed locus | --- | 0.969 | 0.950 | 1.242 | 0.773 | 1.002 | 0.577 | 3.054 | 0.419 |
| 1397883_at | H33845   | Transcribed locus | --- | 0.980 | 0.952 | 1.105 | 0.163 | 1.393 | 0.074 | 1.290 | 0.196 |
| 1376078_at | BI296274 | Transcribed locus | --- | 0.998 | 0.952 | 0.957 | 0.837 | 1.542 | 0.239 | 0.955 | 0.670 |
| 1383741_at | BE100721 | Transcribed locus | --- | 0.979 | 0.952 | 1.005 | 0.916 | 1.007 | 0.971 | 1.032 | 0.509 |
| 1384595_at | AI030888 | Transcribed locus | --- | 0.959 | 0.952 | 0.315 | 0.005 | 0.954 | 0.496 | 0.512 | 0.004 |
| 1378397_at | BM385449 | Transcribed locus | --- | 0.999 | 0.952 | 0.266 | 0.013 | 1.296 | 0.550 | 0.397 | 0.026 |
| 1382567_at | AI013639 | Transcribed locus | --- | 1.026 | 0.953 | 2.885 | 0.013 | 0.997 | 0.958 | 1.863 | 0.088 |
| 1390229_at | BF284176 | Transcribed locus | --- | 0.952 | 0.954 | 0.614 | 0.099 | 0.673 | 0.808 | 0.742 | 0.759 |
| 1395606_at | BF412220 | Transcribed locus | --- | 1.214 | 0.954 | 0.521 | 0.036 | 1.504 | 0.206 | 0.504 | 0.039 |
| 1379143_at | BF409564 | Transcribed locus | --- | 1.106 | 0.954 | 0.884 | 0.424 | 1.156 | 0.551 | 0.546 | 0.237 |
| 1382391_at | BF397532 | Transcribed locus | --- | 1.247 | 0.954 | 0.427 | 0.004 | 1.265 | 0.281 | 0.655 | 0.084 |
| 1398490_at | BM390414 | Transcribed locus | --- | 0.980 | 0.955 | 1.224 | 0.498 | 1.018 | 0.553 | 1.360 | 0.942 |
| 1396014_at | BM384523 | Transcribed locus | --- | 1.023 | 0.955 | 0.995 | 0.860 | 1.009 | 0.814 | 0.999 | 0.947 |
| 1375649_at | BF396469 | Transcribed locus | --- | 1.115 | 0.956 | 1.339 | 0.616 | 1.070 | 0.988 | 1.654 | 0.150 |
| 1397149_at | BF395834 | Transcribed locus | --- | 1.109 | 0.956 | 0.869 | 0.267 | 1.010 | 0.971 | 0.977 | 0.379 |
| 1382595_at | BF289213 | Transcribed locus | --- | 1.074 | 0.956 | 0.641 | 0.126 | 1.166 | 0.038 | 0.667 | 0.131 |
| 1395151_at | AW527014 | Transcribed locus | --- | 1.110 | 0.956 | 0.468 | 0.035 | 1.927 | 0.890 | 0.536 | 0.019 |
| 1382361_at | BF290407 | Transcribed locus | --- | 0.862 | 0.957 | 0.486 | 0.067 | 0.713 | 0.099 | 0.708 | 0.127 |
| 1389796_at | BI298018 | Transcribed locus | --- | 1.001 | 0.957 | 0.904 | 0.043 | 1.371 | 0.110 | 0.649 | 0.014 |
| 1390595_at | AW527996 | Transcribed locus | --- | 1.002 | 0.958 | 1.037 | 0.041 | 1.019 | 0.880 | 1.034 | 0.476 |
| 1376885_at | BE095660 | Transcribed locus | --- | 1.027 | 0.958 | 1.256 | 0.849 | 0.789 | 0.096 | 0.961 | 0.201 |
| 1398563_at | BE115879 | Transcribed locus | --- | 2.002 | 0.959 | 0.884 | 0.397 | 2.024 | 0.100 | 0.730 | 0.246 |
| 1395743_at | BF522730 | Transcribed locus | --- | 0.999 | 0.960 | 0.874 | 0.082 | 1.005 | 0.947 | 0.895 | 0.077 |
| 1391999_at | BI301720 | Transcribed locus | --- | 1.008 | 0.960 | 1.518 | 0.305 | 1.325 | 0.307 | 1.018 | 0.583 |
| 1381271_at | BF403362 | Transcribed locus | --- | 1.362 | 0.961 | 0.916 | 0.443 | 1.086 | 0.732 | 1.075 | 0.278 |
| 1395715_at | BI288113 | Transcribed locus | --- | 0.994 | 0.961 | 0.999 | 0.721 | 0.998 | 0.913 | 0.997 | 0.967 |
| 1394738_at | AW531516 | Transcribed locus | --- | 0.871 | 0.962 | 1.011 | 0.399 | 0.906 | 0.049 | 0.990 | 0.352 |
| 1383681_at | BI289508 | Transcribed locus | --- | 0.993 | 0.962 | 1.057 | 0.551 | 1.001 | 0.990 | 1.134 | 0.257 |
| 1385046_at | BM387916 | Transcribed locus | --- | 1.003 | 0.962 | 0.999 | 0.872 | 1.001 | 0.994 | 1.001 | 0.999 |
| 1397377_at | AA955664 | Transcribed locus | --- | 0.981 | 0.963 | 0.593 | 0.004 | 1.250 | 0.278 | 0.534 | 0.002 |
| 1381112_at | AI555805 | Transcribed locus | --- | 1.017 | 0.963 | 1.278 | 0.685 | 1.194 | 0.115 | 0.846 | 0.138 |
| 1383767_at | AW524430 | Transcribed locus | --- | 0.932 | 0.963 | 1.382 | 0.660 | 0.988 | 0.708 | 1.300 | 0.684 |
| 1398045_at | BE120285 | Transcribed locus | --- | 0.989 | 0.964 | 0.814 | 0.767 | 0.875 | 0.381 | 0.852 | 0.817 |
| 1373234_at | BI277492 | Transcribed locus | --- | 1.020 | 0.964 | 0.505 | 0.040 | 1.015 | 0.625 | 0.754 | 0.214 |
| 1391985_at | BI288541 | Transcribed locus | --- | 0.971 | 0.965 | 1.514 | 0.027 | 0.777 | 0.151 | 1.371 | 0.007 |
| 1377357_at | BE106428 | Transcribed locus | --- | 0.910 | 0.965 | 0.424 | 0.000 | 1.202 | 0.606 | 0.505 | 0.026 |
| 1397119_at | BF563062 | Transcribed locus | --- | 1.001 | 0.965 | 0.495 | 0.062 | 0.990 | 0.991 | 0.512 | 0.075 |
| 1393605_at | AI145306 | Transcribed locus | --- | 0.792 | 0.966 | 0.450 | 0.016 | 1.171 | 0.413 | 0.773 | 0.095 |
| 1381614_at | BF406227 | Transcribed locus | --- | 1.010 | 0.966 | 1.002 | 0.715 | 1.314 | 0.053 | 1.000 | 0.952 |
| 1384588_at | BI295602 | Transcribed locus | --- | 1.011 | 0.966 | 0.886 | 0.270 | 1.484 | 0.103 | 0.835 | 0.219 |
| 1397787_at | BF416511 | Transcribed locus | --- | 1.540 | 0.967 | 1.430 | 0.525 | 1.178 | 0.200 | 1.129 | 0.849 |
| 1395560_at | BF522151 | Transcribed locus | --- | 1.015 | 0.967 | 0.996 | 0.911 | 1.138 | 0.138 | 0.912 | 0.229 |
| 1379268_at | AA924312 | Transcribed locus | --- | 0.998 | 0.967 | 0.599 | 0.022 | 1.001 | 0.948 | 0.603 | 0.022 |
| 1392142_at | AI764196 | Transcribed locus | --- | 0.997 | 0.968 | 1.337 | 0.057 | 0.889 | 0.185 | 0.919 | 0.760 |
| 1383482_at | AI578183 | Transcribed locus | --- | 0.928 | 0.968 | 0.689 | 0.044 | 0.622 | 0.074 | 0.649 | 0.050 |
| 1378199_at | AI408485 | Transcribed locus | --- | 0.998 | 0.969 | 1.417 | 0.080 | 0.968 | 0.400 | 1.032 | 0.650 |
| 1389864_at | BF405086 | Transcribed locus | --- | 1.048 | 0.969 | 0.994 | 0.891 | 0.992 | 0.967 | 1.015 | 0.895 |
| 1372635_at | BF282163 | Transcribed locus | --- | 1.017 | 0.970 | 0.484 | 0.071 | 1.294 | 0.025 | 0.846 | 0.088 |
| 1382555_at | BF407487 | Transcribed locus | --- | 0.994 | 0.970 | 0.939 | 0.605 | 1.031 | 0.984 | 0.904 | 0.875 |
| 1398007_at | AI713125 | Transcribed locus | --- | 1.178 | 0.971 | 1.133 | 0.562 | 2.024 | 0.021 | 1.126 | 0.528 |
| 1374498_at | AW916866 | Transcribed locus | --- | 0.568 | 0.971 | 0.203 | 0.002 | 0.989 | 0.421 | 0.369 | 0.065 |

|              |          |                   |     |       |       |       |       |       |       |       |       |
|--------------|----------|-------------------|-----|-------|-------|-------|-------|-------|-------|-------|-------|
| 1378272_at   | BF411569 | Transcribed locus | --- | 0.936 | 0.972 | 1.281 | 0.940 | 0.944 | 0.452 | 1.003 | 0.962 |
| 1392941_at   | BE103748 | Transcribed locus | --- | 1.011 | 0.972 | 0.423 | 0.053 | 1.272 | 0.119 | 0.426 | 0.035 |
| 1396337_at   | AW529811 | Transcribed locus | --- | 0.852 | 0.972 | 0.621 | 0.324 | 1.592 | 0.488 | 1.072 | 0.261 |
| 1379819_at   | BF392928 | Transcribed locus | --- | 1.011 | 0.972 | 1.100 | 0.355 | 1.112 | 0.087 | 1.025 | 0.640 |
| 1396488_at   | BI291411 | Transcribed locus | --- | 1.233 | 0.972 | 1.072 | 0.748 | 1.416 | 0.244 | 1.005 | 0.999 |
| 1385034_at   | AW527447 | Transcribed locus | --- | 0.991 | 0.973 | 0.996 | 0.899 | 1.053 | 0.879 | 1.006 | 0.954 |
| 1383918_at   | AI070651 | Transcribed locus | --- | 1.006 | 0.973 | 0.495 | 0.014 | 1.405 | 0.048 | 0.524 | 0.019 |
| 1371569_at   | BI294976 | Transcribed locus | --- | 0.892 | 0.973 | 0.917 | 0.571 | 1.592 | 0.028 | 0.875 | 0.951 |
| 1373608_at   | AI639277 | Transcribed locus | --- | 0.925 | 0.973 | 0.817 | 0.437 | 0.856 | 0.418 | 0.853 | 0.434 |
| 1394696_at   | BF287122 | Transcribed locus | --- | 1.067 | 0.973 | 0.576 | 0.429 | 1.212 | 0.103 | 0.931 | 0.506 |
| 1380651_at   | BI296352 | Transcribed locus | --- | 0.845 | 0.974 | 0.286 | 0.039 | 0.770 | 0.548 | 0.519 | 0.010 |
| 1381351_at   | AI599264 | Transcribed locus | --- | 0.984 | 0.974 | 1.195 | 0.414 | 1.137 | 0.194 | 1.046 | 0.549 |
| 1374586_at   | AI103993 | Transcribed locus | --- | 0.997 | 0.974 | 0.507 | 0.021 | 0.763 | 0.439 | 0.336 | 0.033 |
| 1397138_at   | BF396994 | Transcribed locus | --- | 1.109 | 0.975 | 1.577 | 0.631 | 1.112 | 0.667 | 1.040 | 0.791 |
| 1378333_at   | BI284174 | Transcribed locus | --- | 1.034 | 0.975 | 0.966 | 0.734 | 1.035 | 0.810 | 0.810 | 0.221 |
| 1397767_at   | BG377356 | Transcribed locus | --- | 1.590 | 0.975 | 0.886 | 0.644 | 1.407 | 1.000 | 0.795 | 0.107 |
| 1378931_at   | AW523881 | Transcribed locus | --- | 1.000 | 0.976 | 0.996 | 0.981 | 0.999 | 0.962 | 0.997 | 0.942 |
| 1390187_at   | AI060043 | Transcribed locus | --- | 0.997 | 0.976 | 0.462 | 0.051 | 0.995 | 0.979 | 0.388 | 0.023 |
| 1395139_at   | BM388214 | Transcribed locus | --- | 1.271 | 0.976 | 0.997 | 0.230 | 0.932 | 0.165 | 0.833 | 0.097 |
| 1393303_at   | AW918896 | Transcribed locus | --- | 1.019 | 0.976 | 0.953 | 0.995 | 0.886 | 0.998 | 0.863 | 0.398 |
| 1377531_at   | BF405592 | Transcribed locus | --- | 1.005 | 0.976 | 1.021 | 0.853 | 1.001 | 0.180 | 1.003 | 0.989 |
| 1374563_at   | BI301280 | Transcribed locus | --- | 0.794 | 0.977 | 1.051 | 0.738 | 0.871 | 0.072 | 1.147 | 0.344 |
| 1393661_at   | BG381658 | Transcribed locus | --- | 0.984 | 0.977 | 1.058 | 0.881 | 0.683 | 0.133 | 0.751 | 0.068 |
| 1388513_at   | BI281612 | Transcribed locus | --- | 0.999 | 0.977 | 1.002 | 0.773 | 1.356 | 0.079 | 0.998 | 0.571 |
| 1395973_at   | AI236099 | Transcribed locus | --- | 1.063 | 0.978 | 0.756 | 0.230 | 1.564 | 0.460 | 0.722 | 0.017 |
| 1377318_at   | BF415648 | Transcribed locus | --- | 1.204 | 0.978 | 1.200 | 0.809 | 0.794 | 0.436 | 1.271 | 0.859 |
| 1378020_at   | AI060205 | Transcribed locus | --- | 0.989 | 0.978 | 1.273 | 0.029 | 1.174 | 0.270 | 1.866 | 0.129 |
| 1373066_at   | AI407797 | Transcribed locus | --- | 1.009 | 0.978 | 1.003 | 0.586 | 6.919 | 0.002 | 1.828 | 0.076 |
| 1390235_at   | BF410589 | Transcribed locus | --- | 0.998 | 0.979 | 0.919 | 0.939 | 1.007 | 0.535 | 0.930 | 0.970 |
| 1378304_at   | BI276118 | Transcribed locus | --- | 1.002 | 0.979 | 1.506 | 0.724 | 1.035 | 0.804 | 1.449 | 0.045 |
| 1398182_at   | BF411782 | Transcribed locus | --- | 0.693 | 0.979 | 0.596 | 0.080 | 1.019 | 0.031 | 0.580 | 0.077 |
| 1381191_at   | AI145988 | Transcribed locus | --- | 1.011 | 0.980 | 0.560 | 0.007 | 0.902 | 0.987 | 0.509 | 0.047 |
| 1383667_at   | AI603411 | Transcribed locus | --- | 0.787 | 0.980 | 1.001 | 0.866 | 1.679 | 0.012 | 1.066 | 0.841 |
| 1380473_at   | AW529772 | Transcribed locus | --- | 0.995 | 0.980 | 0.987 | 0.952 | 1.614 | 0.088 | 1.024 | 0.984 |
| 1390626_at   | BF398788 | Transcribed locus | --- | 0.883 | 0.981 | 0.992 | 0.839 | 2.100 | 0.182 | 1.625 | 0.048 |
| 1371739_at   | AI104605 | Transcribed locus | --- | 0.959 | 0.981 | 1.244 | 0.709 | 0.920 | 0.156 | 1.171 | 0.910 |
| 1391316_at   | AI072558 | Transcribed locus | --- | 0.949 | 0.981 | 1.002 | 0.197 | 1.057 | 0.467 | 1.167 | 0.986 |
| 1389710_at   | BF558393 | Transcribed locus | --- | 1.007 | 0.982 | 2.032 | 0.047 | 0.751 | 0.214 | 1.181 | 0.367 |
| 1374071_at   | BG670800 | Transcribed locus | --- | 0.951 | 0.982 | 0.673 | 0.049 | 1.007 | 0.974 | 0.960 | 0.842 |
| 1376301_at   | BE110719 | Transcribed locus | --- | 1.127 | 0.983 | 1.218 | 0.392 | 1.587 | 0.035 | 1.142 | 0.908 |
| 1392569_at   | AA955871 | Transcribed locus | --- | 0.990 | 0.983 | 1.230 | 0.196 | 0.985 | 0.948 | 0.992 | 0.929 |
| 1380180_at   | AW528635 | Transcribed locus | --- | 0.998 | 0.984 | 0.355 | 0.011 | 0.999 | 0.994 | 0.415 | 0.012 |
| 1391181_at   | BF390734 | Transcribed locus | --- | 0.999 | 0.984 | 0.675 | 0.126 | 0.998 | 0.273 | 0.753 | 0.122 |
| 1384654_at   | AI113214 | Transcribed locus | --- | 0.909 | 0.984 | 0.995 | 0.982 | 1.019 | 0.970 | 0.999 | 0.940 |
| 1395628_at   | AW434310 | Transcribed locus | --- | 0.999 | 0.984 | 0.977 | 0.140 | 0.998 | 0.986 | 0.975 | 0.104 |
| 1392102_at   | BE118959 | Transcribed locus | --- | 0.998 | 0.984 | 0.939 | 0.531 | 0.544 | 0.009 | 1.030 | 0.850 |
| 1396288_s_at | BI273954 | Transcribed locus | --- | 1.060 | 0.984 | 1.121 | 0.889 | 0.930 | 0.086 | 1.312 | 0.774 |
| 1379689_at   | AI011930 | Transcribed locus | --- | 1.515 | 0.984 | 0.911 | 0.866 | 0.594 | 0.160 | 0.606 | 0.851 |
| 1390553_at   | BE104167 | Transcribed locus | --- | 1.003 | 0.984 | 1.704 | 0.119 | 0.821 | 0.182 | 1.219 | 0.250 |
| 1379523_at   | AA818187 | Transcribed locus | --- | 0.999 | 0.984 | 0.968 | 0.428 | 1.347 | 0.043 | 1.109 | 0.821 |
| 1372326_at   | AA901341 | Transcribed locus | --- | 0.998 | 0.984 | 1.009 | 0.978 | 1.012 | 0.912 | 0.999 | 0.647 |
| 1381095_at   | BI302849 | Transcribed locus | --- | 1.032 | 0.985 | 0.996 | 0.586 | 1.026 | 0.583 | 1.001 | 0.995 |
| 1391558_at   | BF290997 | Transcribed locus | --- | 1.043 | 0.985 | 1.046 | 0.828 | 1.339 | 0.248 | 0.981 | 0.931 |
| 1380939_at   | BE118701 | Transcribed locus | --- | 1.624 | 0.985 | 0.672 | 0.366 | 1.046 | 0.917 | 0.621 | 0.054 |
| 1382910_at   | AI072237 | Transcribed locus | --- | 1.010 | 0.985 | 1.489 | 0.637 | 1.382 | 0.292 | 1.108 | 0.370 |
| 1390540_at   | BF400717 | Transcribed locus | --- | 0.970 | 0.986 | 0.660 | 0.111 | 1.010 | 0.945 | 0.732 | 0.071 |
| 1383997_at   | AA874850 | Transcribed locus | --- | 2.442 | 0.986 | 0.984 | 0.880 | 1.244 | 0.519 | 1.049 | 0.698 |
| 1396283_at   | BI293995 | Transcribed locus | --- | 0.998 | 0.987 | 1.086 | 0.962 | 1.007 | 0.150 | 1.083 | 0.975 |
| 1378422_at   | BE117312 | Transcribed locus | --- | 1.056 | 0.987 | 1.069 | 0.664 | 1.191 | 0.064 | 0.981 | 0.901 |
| 1383578_at   | AI071227 | Transcribed locus | --- | 1.169 | 0.987 | 0.739 | 0.110 | 1.726 | 0.198 | 0.909 | 0.137 |
| 1383590_at   | AA963863 | Transcribed locus | --- | 2.382 | 0.987 | 1.383 | 0.102 | 1.738 | 0.095 | 5.014 | 0.023 |

|            |          |                   |     |       |       |       |       |       |       |       |       |
|------------|----------|-------------------|-----|-------|-------|-------|-------|-------|-------|-------|-------|
| 1395611_at | BE106061 | Transcribed locus | --- | 1.356 | 0.987 | 1.525 | 0.994 | 1.452 | 0.814 | 1.550 | 0.991 |
| 1385470_at | AI045606 | Transcribed locus | --- | 0.998 | 0.987 | 0.672 | 0.191 | 0.715 | 0.218 | 0.677 | 0.188 |
| 1383720_at | AW527404 | Transcribed locus | --- | 1.062 | 0.987 | 1.194 | 0.705 | 1.097 | 0.994 | 0.973 | 0.293 |
| 1390818_at | BF288088 | Transcribed locus | --- | 0.999 | 0.988 | 0.657 | 0.406 | 1.000 | 0.973 | 0.867 | 0.336 |
| 1374713_at | AI228970 | Transcribed locus | --- | 1.000 | 0.988 | 0.854 | 0.437 | 1.001 | 0.995 | 0.825 | 0.502 |
| 1382298_at | BM385955 | Transcribed locus | --- | 1.002 | 0.988 | 1.323 | 0.305 | 1.751 | 0.373 | 1.295 | 0.217 |
| 1375264_at | BF416264 | Transcribed locus | --- | 1.003 | 0.988 | 0.703 | 0.092 | 1.003 | 0.996 | 0.608 | 0.176 |
| 1397390_at | BF398678 | Transcribed locus | --- | 1.285 | 0.988 | 1.047 | 0.933 | 1.009 | 0.628 | 1.071 | 0.627 |
| 1383909_at | BG376442 | Transcribed locus | --- | 0.988 | 0.988 | 0.791 | 0.037 | 0.758 | 0.149 | 0.886 | 0.101 |
| 1392238_at | AI112241 | Transcribed locus | --- | 1.618 | 0.989 | 0.996 | 0.985 | 0.983 | 0.987 | 0.981 | 0.995 |
| 1375376_at | AA997231 | Transcribed locus | --- | 1.059 | 0.989 | 1.035 | 0.038 | 0.999 | 0.993 | 1.091 | 0.011 |
| 1398428_at | BF410381 | Transcribed locus | --- | 1.156 | 0.989 | 1.199 | 0.409 | 1.274 | 0.054 | 0.978 | 0.986 |
| 1391256_at | AA900781 | Transcribed locus | --- | 1.006 | 0.989 | 0.114 | 0.001 | 0.999 | 0.981 | 0.157 | 0.000 |
| 1386709_at | AW916606 | Transcribed locus | --- | 1.349 | 0.989 | 1.058 | 0.605 | 1.096 | 0.697 | 0.509 | 0.018 |
| 1378269_at | AI112113 | Transcribed locus | --- | 1.086 | 0.989 | 0.819 | 0.383 | 0.971 | 0.727 | 0.804 | 0.227 |
| 1371767_at | BG380270 | Transcribed locus | --- | 1.312 | 0.990 | 0.877 | 0.054 | 1.020 | 0.905 | 0.839 | 0.006 |
| 1376126_at | BE107449 | Transcribed locus | --- | 1.079 | 0.990 | 0.944 | 0.909 | 1.090 | 0.907 | 0.768 | 0.147 |
| 1380774_at | AI227918 | Transcribed locus | --- | 1.339 | 0.990 | 1.001 | 0.978 | 1.025 | 0.901 | 0.985 | 0.448 |
| 1380099_at | BM391357 | Transcribed locus | --- | 1.004 | 0.991 | 0.822 | 0.432 | 0.926 | 0.562 | 0.854 | 0.806 |
| 1391073_at | AA964252 | Transcribed locus | --- | 1.010 | 0.992 | 1.216 | 0.892 | 1.291 | 0.063 | 1.014 | 0.769 |
| 1380543_at | BF564294 | Transcribed locus | --- | 1.011 | 0.992 | 0.880 | 0.874 | 1.021 | 0.758 | 1.033 | 0.959 |
| 1379733_at | BF396474 | Transcribed locus | --- | 0.999 | 0.992 | 0.920 | 0.060 | 1.004 | 0.981 | 0.859 | 0.071 |
| 1377455_at | BE106526 | Transcribed locus | --- | 1.854 | 0.992 | 0.994 | 0.997 | 1.044 | 0.893 | 1.045 | 0.826 |
| 1390898_at | BE111116 | Transcribed locus | --- | 1.369 | 0.992 | 1.161 | 0.500 | 1.468 | 0.150 | 0.931 | 0.498 |
| 1392297_at | BF410297 | Transcribed locus | --- | 1.252 | 0.992 | 1.027 | 0.723 | 0.973 | 0.980 | 1.691 | 0.167 |
| 1392228_at | BI294408 | Transcribed locus | --- | 0.998 | 0.992 | 0.612 | 0.104 | 1.145 | 0.397 | 0.992 | 0.837 |
| 1396785_at | BF419700 | Transcribed locus | --- | 1.148 | 0.992 | 0.939 | 0.821 | 1.184 | 0.311 | 1.110 | 0.234 |
| 1379622_at | BF405145 | Transcribed locus | --- | 1.001 | 0.992 | 0.858 | 0.281 | 1.007 | 0.396 | 0.997 | 0.952 |
| 1389949_at | BI298868 | Transcribed locus | --- | 1.002 | 0.992 | 0.884 | 0.955 | 1.005 | 0.995 | 0.881 | 0.991 |
| 1383452_at | BG670461 | Transcribed locus | --- | 0.998 | 0.992 | 1.028 | 0.876 | 1.000 | 0.998 | 1.000 | 0.992 |
| 1388887_at | AI178222 | Transcribed locus | --- | 1.003 | 0.993 | 0.568 | 0.012 | 1.144 | 0.878 | 0.656 | 0.011 |
| 1386804_at | BF553434 | Transcribed locus | --- | 1.002 | 0.993 | 1.042 | 0.736 | 1.043 | 0.813 | 1.439 | 0.124 |
| 1377059_at | AW533194 | Transcribed locus | --- | 0.998 | 0.993 | 1.006 | 0.692 | 1.042 | 0.138 | 1.146 | 0.042 |
| 1379917_at | AW528106 | Transcribed locus | --- | 1.599 | 0.993 | 1.185 | 0.822 | 1.434 | 0.218 | 0.886 | 0.096 |
| 1395027_at | BI290841 | Transcribed locus | --- | 0.998 | 0.993 | 1.259 | 0.988 | 1.383 | 0.253 | 0.924 | 0.810 |
| 1390030_at | BI284294 | Transcribed locus | --- | 0.999 | 0.993 | 1.004 | 0.890 | 1.001 | 0.991 | 1.000 | 0.993 |
| 1377822_at | AI179605 | Transcribed locus | --- | 1.070 | 0.993 | 1.001 | 0.303 | 1.114 | 0.137 | 0.910 | 0.485 |
| 1390874_at | BE109206 | Transcribed locus | --- | 0.973 | 0.993 | 0.379 | 0.005 | 1.281 | 0.609 | 0.738 | 0.030 |
| 1388942_at | BM390129 | Transcribed locus | --- | 0.767 | 0.993 | 0.459 | 0.002 | 1.054 | 0.975 | 0.378 | 0.003 |
| 1382516_at | AI170660 | Transcribed locus | --- | 1.001 | 0.994 | 0.331 | 0.003 | 0.687 | 0.983 | 0.509 | 0.003 |
| 1383253_at | AI179795 | Transcribed locus | --- | 1.034 | 0.994 | 0.802 | 0.249 | 0.739 | 0.090 | 0.633 | 0.047 |
| 1384574_at | AI502627 | Transcribed locus | --- | 1.105 | 0.994 | 0.994 | 0.950 | 1.001 | 0.998 | 0.996 | 0.999 |
| 1397744_at | BI276183 | Transcribed locus | --- | 1.002 | 0.994 | 1.017 | 0.472 | 1.007 | 0.354 | 0.978 | 0.700 |
| 1378001_at | AI548615 | Transcribed locus | --- | 1.015 | 0.994 | 0.975 | 0.908 | 1.036 | 0.602 | 0.997 | 0.990 |
| 1397564_at | BF286959 | Transcribed locus | --- | 1.117 | 0.994 | 1.524 | 0.869 | 0.985 | 0.328 | 1.306 | 0.369 |
| 1391035_at | BE096618 | Transcribed locus | --- | 0.875 | 0.994 | 1.164 | 0.269 | 0.992 | 0.902 | 0.966 | 0.925 |
| 1394959_at | AI502099 | Transcribed locus | --- | 1.024 | 0.994 | 0.997 | 0.543 | 0.923 | 0.097 | 1.002 | 0.988 |
| 1374960_at | BM390080 | Transcribed locus | --- | 1.002 | 0.994 | 0.994 | 0.022 | 1.001 | 0.866 | 0.991 | 0.041 |
| 1382793_at | BF288344 | Transcribed locus | --- | 0.998 | 0.994 | 1.265 | 0.922 | 1.000 | 0.489 | 0.999 | 0.996 |
| 1391094_at | BM387077 | Transcribed locus | --- | 1.002 | 0.994 | 0.883 | 0.584 | 1.062 | 0.660 | 0.577 | 0.227 |
| 1379712_at | BF408872 | Transcribed locus | --- | 1.003 | 0.995 | 1.197 | 0.066 | 1.307 | 0.422 | 1.123 | 0.021 |
| 1389648_at | AI170382 | Transcribed locus | --- | 1.001 | 0.995 | 0.980 | 0.787 | 0.778 | 0.026 | 0.868 | 0.015 |
| 1380428_at | AI030973 | Transcribed locus | --- | 0.940 | 0.995 | 0.763 | 0.311 | 0.963 | 0.549 | 0.688 | 0.234 |
| 1377966_at | BI275560 | Transcribed locus | --- | 0.995 | 0.995 | 1.004 | 0.951 | 0.808 | 0.168 | 0.814 | 0.634 |
| 1395907_at | BF416753 | Transcribed locus | --- | 1.007 | 0.995 | 0.974 | 0.980 | 0.999 | 0.999 | 0.984 | 0.725 |
| 1378695_at | AI007942 | Transcribed locus | --- | 1.001 | 0.995 | 1.194 | 0.049 | 1.475 | 0.236 | 1.262 | 0.032 |
| 1382640_at | AA944498 | Transcribed locus | --- | 0.919 | 0.995 | 1.010 | 0.938 | 1.002 | 0.966 | 1.000 | 0.980 |
| 1393358_at | AA957379 | Transcribed locus | --- | 1.001 | 0.995 | 0.998 | 0.974 | 1.001 | 0.259 | 1.001 | 0.995 |
| 1398510_at | BI295013 | Transcribed locus | --- | 0.999 | 0.996 | 1.278 | 0.238 | 0.831 | 0.486 | 0.829 | 0.348 |
| 1379060_at | BG378788 | Transcribed locus | --- | 0.895 | 0.996 | 0.502 | 0.244 | 1.323 | 0.807 | 1.525 | 0.162 |
| 1398099_at | AW527241 | Transcribed locus | --- | 1.000 | 0.996 | 1.001 | 0.883 | 1.077 | 0.983 | 1.011 | 0.992 |

|            |          |                                                                                                                                  |     |        |       |       |       |        |       |       |       |
|------------|----------|----------------------------------------------------------------------------------------------------------------------------------|-----|--------|-------|-------|-------|--------|-------|-------|-------|
| 1397186_at | AW529325 | Transcribed locus                                                                                                                | --- | 0.793  | 0.996 | 1.012 | 0.295 | 1.033  | 0.268 | 1.123 | 0.582 |
| 1397189_at | BE108217 | Transcribed locus                                                                                                                | --- | 0.822  | 0.996 | 0.154 | 0.000 | 0.641  | 0.948 | 0.128 | 0.000 |
| 1376859_at | BM384750 | Transcribed locus                                                                                                                | --- | 1.001  | 0.996 | 0.553 | 0.072 | 1.347  | 0.072 | 0.937 | 0.210 |
| 1395131_at | BF288188 | Transcribed locus                                                                                                                | --- | 1.013  | 0.997 | 1.106 | 0.481 | 1.380  | 0.003 | 0.970 | 0.570 |
| 1398702_at | BE117785 | Transcribed locus                                                                                                                | --- | 0.998  | 0.997 | 0.865 | 0.934 | 1.002  | 0.996 | 0.926 | 0.767 |
| 1385119_at | AI043832 | Transcribed locus                                                                                                                | --- | 0.749  | 0.997 | 0.231 | 0.027 | 0.685  | 0.329 | 0.179 | 0.025 |
| 1398445_at | BF420311 | Transcribed locus                                                                                                                | --- | 1.001  | 0.997 | 0.564 | 0.187 | 1.621  | 0.114 | 0.824 | 0.139 |
| 1378234_at | BF524457 | Transcribed locus                                                                                                                | --- | 1.455  | 0.997 | 0.997 | 0.988 | 1.974  | 0.087 | 1.035 | 0.197 |
| 1374166_at | AW252076 | Transcribed locus                                                                                                                | --- | 1.002  | 0.997 | 1.138 | 0.825 | 1.005  | 0.991 | 1.004 | 0.998 |
| 1377628_at | AW523327 | Transcribed locus                                                                                                                | --- | 1.001  | 0.997 | 1.379 | 0.214 | 1.338  | 0.690 | 1.026 | 0.835 |
| 1392652_at | AI060083 | Transcribed locus                                                                                                                | --- | 0.986  | 0.997 | 0.813 | 0.125 | 1.004  | 0.990 | 0.996 | 0.920 |
| 1384075_at | BF523960 | Transcribed locus                                                                                                                | --- | 1.292  | 0.997 | 1.160 | 0.366 | 1.716  | 0.292 | 0.967 | 0.371 |
| 1393576_at | AA963989 | Transcribed locus                                                                                                                | --- | 1.003  | 0.997 | 0.998 | 0.982 | 1.011  | 0.778 | 1.000 | 0.569 |
| 1383006_at | AW528365 | Transcribed locus                                                                                                                | --- | 1.000  | 0.997 | 1.001 | 0.983 | 1.003  | 1.000 | 1.000 | 0.879 |
| 1390942_at | AI043817 | Transcribed locus                                                                                                                | --- | 1.001  | 0.998 | 2.052 | 0.016 | 0.957  | 0.971 | 1.592 | 0.206 |
| 1381762_at | AW526420 | Transcribed locus                                                                                                                | --- | 1.001  | 0.998 | 0.894 | 0.076 | 1.095  | 0.223 | 1.065 | 0.628 |
| 1396704_at | BF394808 | Transcribed locus                                                                                                                | --- | 1.011  | 0.999 | 0.410 | 0.001 | 0.987  | 0.246 | 0.560 | 0.007 |
| 1393395_at | BE120797 | Transcribed locus                                                                                                                | --- | 1.000  | 0.999 | 0.738 | 0.213 | 0.724  | 0.882 | 0.998 | 0.985 |
| 1391862_at | BG377635 | Transcribed locus                                                                                                                | --- | 0.689  | 0.999 | 0.327 | 0.009 | 1.158  | 0.880 | 0.689 | 0.101 |
| 1384829_at | AI454917 | Transcribed locus                                                                                                                | --- | 0.884  | 1.000 | 0.588 | 0.051 | 0.951  | 0.414 | 0.551 | 0.016 |
| 1374286_at | AA996836 | Transcribed locus                                                                                                                | --- | 1.000  | 1.000 | 1.334 | 0.011 | 1.091  | 0.313 | 1.247 | 0.021 |
| 1375655_at | BE107208 | Transcribed locus                                                                                                                | --- | 1.000  | 1.000 | 2.040 | 0.632 | 1.334  | 0.253 | 1.158 | 0.597 |
| 1398220_at | BE121176 | Transcribed locus                                                                                                                | --- | 1.000  | 1.000 | 0.976 | 0.019 | 1.023  | 1.000 | 1.137 | 0.147 |
| 1392352_at | AW521481 | Transcribed locus                                                                                                                | --- | 1.481  | 1.000 | 1.226 | 0.556 | 1.078  | 0.904 | 1.869 | 0.186 |
| 1377251_at | AW251255 | Transcribed locus                                                                                                                | --- | 1.260  | 1.000 | 0.788 | 0.225 | 1.449  | 0.172 | 1.104 | 0.734 |
| 1376939_at | BI284907 | Transcribed locus                                                                                                                | --- | 1.000  | 1.000 | 0.970 | 0.588 | 1.470  | 0.078 | 0.931 | 0.603 |
| 1377346_at | AI112098 | Transcribed locus, moderately similar to NP_001007591.1 hypothetical protein LOC433886 [Mus musculus]                            | --- | 0.954  | 0.715 | 1.353 | 0.044 | 0.705  | 0.056 | 1.272 | 0.515 |
| 1378706_at | BE101875 | Transcribed locus, moderately similar to NP_003416.1 zinc finger protein 45 [Homo sapiens]                                       | --- | 0.999  | 0.403 | 0.996 | 0.927 | 0.727  | 0.267 | 0.982 | 0.377 |
| 1398713_at | BI279821 | Transcribed locus, moderately similar to NP_032607.1 melanoma antigen [Mus musculus]                                             | --- | 0.958  | 0.596 | 1.358 | 0.163 | 1.256  | 0.220 | 1.136 | 0.324 |
| 1389006_at | AI170394 | Transcribed locus, moderately similar to NP_035543.1 sex-limited protein [Mus musculus]                                          | --- | 1.003  | 0.993 | 1.032 | 0.860 | 5.505  | 0.002 | 1.693 | 0.138 |
| 1374682_at | BM383170 | Transcribed locus, moderately similar to NP_035569.1 SRY-box 13 [Mus musculus]                                                   | --- | 2.358  | 0.000 | 1.549 | 0.005 | 2.410  | 0.001 | 1.428 | 0.013 |
| 1398396_at | BF281315 | Transcribed locus, moderately similar to NP_037116.1 myosin IXb [Rattus norvegicus]                                              | --- | 1.417  | 0.338 | 0.442 | 0.023 | 1.401  | 0.191 | 0.654 | 0.011 |
| 1394620_at | BI288579 | Transcribed locus, moderately similar to NP_038630.1 metallothionein I [Mus musculus]                                            | --- | 0.615  | 0.006 | 0.515 | 0.050 | 0.516  | 0.001 | 0.603 | 0.037 |
| 1384179_at | BI294722 | Transcribed locus, moderately similar to NP_038871.1 zinc finger protein 53 [Mus musculus]                                       | --- | 1.418  | 0.071 | 1.032 | 0.346 | 1.828  | 0.017 | 1.292 | 0.020 |
| 1367474_at | AI231320 | Transcribed locus, moderately similar to NP_055637.1 Sec24-related protein D [Homo sapiens]                                      | --- | 0.855  | 0.007 | 0.984 | 0.702 | 0.907  | 0.087 | 1.105 | 0.004 |
| 1372096_at | BI296062 | Transcribed locus, moderately similar to NP_060655.1 hypothetical protein LOC55208 isoform a [Homo sapiens]                      | --- | 1.297  | 0.082 | 1.218 | 0.072 | 1.364  | 0.016 | 1.177 | 0.145 |
| 1383377_at | BG372192 | Transcribed locus, moderately similar to NP_062289.1 DNA binding protein with his-thr domain [Mus musculus]                      | --- | 2.344  | 0.229 | 0.830 | 0.498 | 1.908  | 0.161 | 0.920 | 0.182 |
| 1372479_at | AI175666 | Transcribed locus, moderately similar to NP_064456.1 fibrinogen, beta polypeptide [Rattus norvegicus]                            | --- | 21.995 | 0.001 | 0.995 | 0.523 | 18.446 | 0.000 | 1.534 | 0.092 |
| 1373643_at | AI177028 | Transcribed locus, moderately similar to NP_081983.2 delangin isoform A [Mus musculus]                                           | --- | 0.747  | 0.504 | 1.103 | 0.279 | 0.785  | 0.558 | 0.832 | 0.042 |
| 1382309_at | BI286390 | Transcribed locus, moderately similar to NP_081983.2 delangin isoform A [Mus musculus]                                           | --- | 0.991  | 0.783 | 1.414 | 0.004 | 1.069  | 0.896 | 1.364 | 0.023 |
| 1391608_at | AI602260 | Transcribed locus, moderately similar to NP_083037.1 poly(A)-specific ribonuclease (deadenylation nuclease) [Mus musculus]       | --- | 0.749  | 0.354 | 0.776 | 0.086 | 0.579  | 0.074 | 1.325 | 0.700 |
| 1381416_at | AI029400 | Transcribed locus, moderately similar to NP_114131.1 transmembrane protein induced by tumor necrosis factor alpha [Homo sapiens] | --- | 0.730  | 0.300 | 0.132 | 0.001 | 0.208  | 0.007 | 0.310 | 0.022 |
| 1391477_at | BF396595 | Transcribed locus, moderately similar to NP_446319.1 tumor protein, translationally-controlled 1 [Rattus norvegicus]             | --- | 0.540  | 0.078 | 0.719 | 0.738 | 1.656  | 0.008 | 1.211 | 0.253 |
| 1372481_at | AI102873 | Transcribed locus, moderately similar to NP_598415.1 CD34 antigen [Mus musculus]                                                 | --- | 1.041  | 0.933 | 0.995 | 0.971 | 1.005  | 0.942 | 0.995 | 0.813 |
| 1374765_at | BI288055 | Transcribed locus, moderately similar to NP_598623.1 fibrinogen, gamma polypeptide [Mus musculus]                                | --- | 1.019  | 0.793 | 1.294 | 0.269 | 0.921  | 0.301 | 1.775 | 0.011 |
| 1391573_at | AA891842 | Transcribed locus, moderately similar to NP_620203.1 podocalyxin-like [Rattus norvegicus]                                        | --- | 0.370  | 0.036 | 1.154 | 0.236 | 0.204  | 0.019 | 1.059 | 0.771 |
| 1376708_at | BM385170 | Transcribed locus, moderately similar to NP_666286.1 hypothetical protein LOC232748 [Mus musculus]                               | --- | 11.625 | 0.005 | 5.441 | 0.001 | 11.736 | 0.002 | 9.003 | 0.000 |
| 1392683_at | AW142773 | Transcribed locus, moderately similar to NP_766102.1 hypothetical protein LOC213068 [Mus musculus]                               | --- | 2.385  | 0.012 | 1.202 | 0.218 | 6.630  | 0.001 | 1.078 | 0.574 |
| 1399069_at | AI234008 | Transcribed locus, moderately similar to NP_766286.2 hypothetical protein LOC230648 [Mus musculus]                               | --- | 0.549  | 0.161 | 0.337 | 0.000 | 0.911  | 0.273 | 0.388 | 0.005 |
| 1376887_at | AI555799 | Transcribed locus, moderately similar to NP_775540.3 zinc finger protein 445 [Mus musculus]                                      | --- | 0.887  | 0.409 | 0.996 | 0.965 | 0.925  | 0.178 | 1.103 | 0.728 |
| 1380883_at | BF386294 | Transcribed locus, moderately similar to NP_941007.1 hypothetical protein LOC219114 [Mus musculus]                               | --- | 1.717  | 0.301 | 0.445 | 0.006 | 0.674  | 0.318 | 0.309 | 0.001 |
| 1392772_at | BF285633 | Transcribed locus, moderately similar to NP_997554.1 zinc finger protein 318 isoform 1 [Mus musculus]                            | --- | 1.431  | 0.059 | 0.774 | 0.311 | 1.422  | 0.052 | 0.923 | 0.406 |
| 1377180_at | BF394102 | Transcribed locus, moderately similar to NP_998724.1 superkiller viralicidic activity 2-like [Rattus norvegicus]                 | --- | 2.772  | 0.000 | 0.979 | 0.497 | 0.811  | 0.773 | 0.595 | 0.010 |
| 1383713_at | BM389843 | Transcribed locus, moderately similar to XP_132808.1 PREDICTED: hypothetical protein LOC70291 isoform 1 [Mus musculus]           | --- | 0.879  | 0.089 | 0.707 | 0.000 | 1.025  | 0.311 | 0.768 | 0.162 |
| 1390228_at | BM384446 | Transcribed locus, moderately similar to XP_213925.1 PREDICTED: similar to early quiescence protein-1 [Rattus norvegicus]        | --- | 0.633  | 0.088 | 1.233 | 0.858 | 0.629  | 0.091 | 1.132 | 0.831 |

|              |          |                                                                                                                                                                                                                                                                                      |     |       |       |       |       |       |       |       |       |
|--------------|----------|--------------------------------------------------------------------------------------------------------------------------------------------------------------------------------------------------------------------------------------------------------------------------------------|-----|-------|-------|-------|-------|-------|-------|-------|-------|
| 1374056_at   | AI236229 | Transcribed locus, moderately similar to XP_214446.2 PREDICTED: similar to Autosomal Highly Conserved Protein [Rattus norvegicus]                                                                                                                                                    | --- | 1.225 | 0.570 | 0.708 | 0.221 | 1.267 | 0.511 | 1.001 | 0.998 |
| 1395718_at   | BE102746 | Transcribed locus, moderately similar to XP_216760.3 PREDICTED: similar to peroxisomal membrane protein-1 like protein [Rattus norvegicus]                                                                                                                                           | --- | 0.783 | 0.170 | 0.500 | 0.006 | 0.467 | 0.024 | 0.381 | 0.025 |
| 1381384_at   | AW530069 | Transcribed locus, moderately similar to XP_223005.2 PREDICTED: similar to Mdes protein [Rattus norvegicus]                                                                                                                                                                          | --- | 0.782 | 0.267 | 0.846 | 0.834 | 0.512 | 0.053 | 0.433 | 0.122 |
| 1392778_at   | AA891634 | Transcribed locus, moderately similar to XP_236873.3 PREDICTED: similar to RIKEN cDNA 4930555G01 [Rattus norvegicus]                                                                                                                                                                 | --- | 0.992 | 0.910 | 0.721 | 0.166 | 1.134 | 0.500 | 0.555 | 0.045 |
| 1397495_at   | BE102358 | Transcribed locus, moderately similar to XP_237998.3 PREDICTED: similar to mKIAA0183 protein [Rattus norvegicus]                                                                                                                                                                     | --- | 0.994 | 0.976 | 1.523 | 0.059 | 0.910 | 0.943 | 0.999 | 0.579 |
| 1375950_a_at | BI294235 | Transcribed locus, moderately similar to XP_343384.2 PREDICTED: similar to KIAA1052 protein [Rattus norvegicus]                                                                                                                                                                      | --- | 1.309 | 0.036 | 2.217 | 0.001 | 1.426 | 0.358 | 1.591 | 0.014 |
| 1382536_at   | BE109224 | Transcribed locus, moderately similar to XP_415884.1 PREDICTED: similar to Thyroid hormone receptor-associated protein complex 240 kDa component (Trap240) (Activator-recruited cofactor 250 kDa component) (ARC250) (Thyroid hormone receptor associated protein 1) [Gallus gallus] | --- | 0.709 | 0.343 | 1.835 | 0.135 | 0.475 | 0.017 | 1.558 | 0.204 |
| 1383949_at   | AI703880 | Transcribed locus, moderately similar to XP_415884.1 PREDICTED: similar to Thyroid hormone receptor-associated protein complex 240 kDa component (Trap240) (Activator-recruited cofactor 250 kDa component) (ARC250) (Thyroid hormone receptor associated protein 1) [Gallus gallus] | --- | 1.078 | 0.471 | 0.929 | 0.047 | 1.042 | 0.289 | 0.880 | 0.050 |
| 1397614_at   | BF404116 | Transcribed locus, moderately similar to XP_416880.1 PREDICTED: similar to Gamma-aminobutyric-acid receptor alpha-5 subunit precursor (GABA(A) receptor) [Gallus gallus]                                                                                                             | --- | 0.682 | 0.753 | 1.074 | 0.992 | 1.153 | 0.487 | 1.198 | 0.816 |
| 1376994_at   | BE098799 | Transcribed locus, moderately similar to XP_418823.1 PREDICTED: similar to leucine-rich repeats containing F-box protein FBL3 [Gallus gallus]                                                                                                                                        | --- | 1.111 | 0.468 | 1.665 | 0.140 | 1.166 | 0.252 | 1.421 | 0.075 |
| 1390981_at   | AI028965 | Transcribed locus, moderately similar to XP_423294.1 PREDICTED: similar to dolichyl-diphosphooligosaccharide-protein glycotransferase (EC 2.4.1.119) 50k chain - chicken [Gallus gallus]                                                                                             | --- | 0.756 | 0.297 | 0.573 | 0.046 | 1.198 | 0.214 | 0.645 | 0.019 |
| 1395963_at   | BI303658 | Transcribed locus, moderately similar to XP_509099.1 PREDICTED: similar to mitogen-activated protein kinase kinase 12; leucine zipper protein kinase; zipper protein kinase; protein kinase MUK; dual leucine zipper kinase DLK [Pan troglodytes]                                    | --- | 0.896 | 0.592 | 1.041 | 0.159 | 0.747 | 0.905 | 0.904 | 0.883 |
| 1394452_at   | BM391487 | Transcribed locus, moderately similar to XP_510359.1 PREDICTED: hypothetical protein XP_510359 [Pan troglodytes]                                                                                                                                                                     | --- | 0.912 | 0.268 | 0.553 | 0.028 | 1.113 | 0.663 | 1.024 | 0.165 |
| 1375353_at   | BI296696 | Transcribed locus, moderately similar to XP_512059.1 PREDICTED: similar to Cdk5 and Abl enzyme substrate 1 [Pan troglodytes]                                                                                                                                                         | --- | 0.446 | 0.149 | 1.065 | 0.832 | 0.455 | 0.006 | 0.819 | 0.068 |
| 1393156_at   | BI278333 | Transcribed locus, moderately similar to XP_514381.1 PREDICTED: similar to mannan-binding lectin serine protease 2 isoform 1 precursor; MBL-associated plasma protein of 19 kDa; small MBL-associated protein; MBL-associated protein MAp19 [Pan troglodytes]                        | --- | 0.547 | 0.038 | 0.456 | 0.089 | 0.713 | 0.096 | 0.614 | 0.050 |
| 1385893_at   | AA874903 | Transcribed locus, moderately similar to XP_515015.1 PREDICTED: similar to immunoglobulin lambda light chain [Pan troglodytes]                                                                                                                                                       | --- | 0.979 | 0.672 | 1.760 | 0.064 | 0.811 | 0.094 | 1.464 | 0.097 |
| 1376053_at   | BM385144 | Transcribed locus, moderately similar to XP_517387.1 PREDICTED: similar to ribosomal protein L34; 60S ribosomal protein L34 [Pan troglodytes]                                                                                                                                        | --- | 0.925 | 0.075 | 1.524 | 0.021 | 0.817 | 0.072 | 1.291 | 0.204 |
| 1374724_at   | BG378232 | Transcribed locus, moderately similar to XP_518719.1 PREDICTED: similar to tumor differentially expressed 2 [Pan troglodytes]                                                                                                                                                        | --- | 1.277 | 0.187 | 2.205 | 0.192 | 1.562 | 0.160 | 2.459 | 0.720 |
| 1391194_at   | BG377337 | Transcribed locus, moderately similar to XP_528650.1 PREDICTED: similar to Superoxide dismutase [Pan troglodytes]                                                                                                                                                                    | --- | 1.052 | 0.761 | 0.750 | 0.042 | 0.870 | 0.246 | 1.054 | 0.652 |
| 1382886_at   | BE100329 | Transcribed locus, moderately similar to XP_528703.1 PREDICTED: similar to chromatin-specific transcription elongation factor large subunit [Pan troglodytes]                                                                                                                        | --- | 0.552 | 0.002 | 0.476 | 0.051 | 0.534 | 0.030 | 0.510 | 0.148 |
| 1379410_at   | AA925019 | Transcribed locus, moderately similar to XP_529790.1 PREDICTED: hypothetical protein XP_529790 [Pan troglodytes]                                                                                                                                                                     | --- | 0.638 | 0.010 | 0.552 | 0.033 | 0.524 | 0.009 | 0.704 | 0.103 |
| 1376176_at   | AI145586 | Transcribed locus, moderately similar to XP_533875.2 PREDICTED: similar to microtubule associated serine/threonine kinase 2 [Canis familiaris]                                                                                                                                       | --- | 0.347 | 0.001 | 0.452 | 0.120 | 0.188 | 0.026 | 0.611 | 0.164 |
| 1388838_at   | AA943752 | Transcribed locus, moderately similar to XP_535115.1 PREDICTED: similar to chromatin modifying protein 4C isoform 1 [Canis familiaris]                                                                                                                                               | --- | 1.130 | 0.445 | 1.026 | 0.852 | 0.901 | 0.479 | 0.740 | 0.031 |
| 1390380_at   | BE116633 | Transcribed locus, moderately similar to XP_573674.1 PREDICTED: similar to U2 small nuclear ribonucleoprotein auxiliary factor 35 kDa subunit related-protein 1 (U2(RNU2) small nuclear RNA auxillary factor 1-like 1) (SP2) [Rattus norvegicus]                                     | --- | 1.360 | 0.021 | 1.336 | 0.075 | 1.319 | 0.055 | 1.334 | 0.009 |
| 1375463_at   | BG380847 | Transcribed locus, moderately similar to XP_573674.1 PREDICTED: similar to U2 small nuclear ribonucleoprotein auxiliary factor 35 kDa subunit related-protein 1 (U2(RNU2) small nuclear RNA auxillary factor 1-like 1) (SP2) [Rattus norvegicus]                                     | --- | 1.192 | 0.199 | 1.282 | 0.231 | 0.942 | 0.867 | 0.898 | 0.490 |
| 1382802_x_at | AW920828 | Transcribed locus, moderately similar to XP_574110.1 PREDICTED: similar to Ab2-143 [Rattus norvegicus]                                                                                                                                                                               | --- | 1.327 | 0.610 | 1.013 | 0.385 | 0.968 | 0.848 | 0.822 | 0.314 |
| 1377705_at   | BF549971 | Transcribed locus, moderately similar to XP_574280.1 PREDICTED: similar to Ab2-143 [Rattus norvegicus]                                                                                                                                                                               | --- | 0.889 | 0.757 | 1.025 | 0.206 | 1.077 | 0.096 | 0.958 | 0.100 |
| 1377706_x_at | BF549971 | Transcribed locus, moderately similar to XP_574280.1 PREDICTED: similar to Ab2-143 [Rattus norvegicus]                                                                                                                                                                               | --- | 0.934 | 0.858 | 0.966 | 0.296 | 1.055 | 0.117 | 0.876 | 0.204 |
| 1391505_x_at | BI275261 | Transcribed locus, moderately similar to XP_574280.1 PREDICTED: similar to Ab2-143 [Rattus norvegicus]                                                                                                                                                                               | --- | 1.290 | 0.866 | 1.373 | 0.707 | 1.224 | 0.137 | 1.139 | 0.210 |
| 1379497_at   | BI275261 | Transcribed locus, moderately similar to XP_574280.1 PREDICTED: similar to Ab2-143 [Rattus norvegicus]                                                                                                                                                                               | --- | 1.485 | 0.916 | 1.307 | 0.568 | 1.148 | 0.200 | 1.028 | 0.126 |

|              |          |                                                                                                                                                                                     |     |       |       |       |       |        |       |       |       |
|--------------|----------|-------------------------------------------------------------------------------------------------------------------------------------------------------------------------------------|-----|-------|-------|-------|-------|--------|-------|-------|-------|
| 1379735_at   | AA850836 | Transcribed locus, moderately similar to XP_574686.1 PREDICTED: similar to ORF2 consensus sequence encoding endonuclease and reverse transcriptase minus RNaseH [Rattus norvegicus] | --- | 1.577 | 0.042 | 1.095 | 0.100 | 1.080  | 0.767 | 1.001 | 0.950 |
| 1394951_at   | BE107308 | Transcribed locus, moderately similar to XP_575346.1 PREDICTED: similar to Ab1-219 [Rattus norvegicus]                                                                              | --- | 1.081 | 0.862 | 1.037 | 0.741 | 1.169  | 0.269 | 1.422 | 0.105 |
| 1396189_at   | BI274116 | Transcribed locus, moderately similar to XP_575703.1 PREDICTED: similar to LRRGT00139 [Rattus norvegicus]                                                                           | --- | 1.374 | 0.440 | 0.635 | 0.069 | 1.098  | 0.767 | 0.570 | 0.167 |
| 1396190_x_at | BI274116 | Transcribed locus, moderately similar to XP_575703.1 PREDICTED: similar to LRRGT00139 [Rattus norvegicus]                                                                           | --- | 0.971 | 0.487 | 0.599 | 0.064 | 1.130  | 0.555 | 0.673 | 0.040 |
| 1380913_at   | BG374053 | Transcribed locus, moderately similar to XP_576220.1 PREDICTED: similar to ORF2 consensus sequence encoding endonuclease and reverse transcriptase minus RNaseH [Rattus norvegicus] | --- | 1.074 | 0.444 | 0.755 | 0.274 | 1.032  | 0.769 | 0.754 | 0.337 |
| 1380662_at   | BM389613 | Transcribed locus, moderately similar to XP_576260.1 PREDICTED: similar to LRRGT00194 [Rattus norvegicus]                                                                           | --- | 0.999 | 0.995 | 1.000 | 0.972 | 1.004  | 0.975 | 0.998 | 0.305 |
| 1390698_at   | BF395822 | Transcribed locus, moderately similar to XP_576460.1 PREDICTED: similar to hypothetical protein PB402898.00.0 [Rattus norvegicus]                                                   | --- | 2.074 | 0.002 | 1.962 | 0.001 | 2.041  | 0.031 | 2.104 | 0.002 |
| 1379696_at   | BI291833 | Transcribed locus, moderately similar to XP_576460.1 PREDICTED: similar to hypothetical protein PB402898.00.0 [Rattus norvegicus]                                                   | --- | 8.571 | 0.003 | 1.768 | 0.123 | 13.135 | 0.000 | 2.111 | 0.027 |
| 1384096_at   | BI279347 | Transcribed locus, moderately similar to XP_576460.1 PREDICTED: similar to hypothetical protein PB402898.00.0 [Rattus norvegicus]                                                   | --- | 0.272 | 0.010 | 0.380 | 0.061 | 0.292  | 0.021 | 0.490 | 0.083 |
| 1377759_at   | BG666928 | Transcribed locus, moderately similar to XP_576460.1 PREDICTED: similar to hypothetical protein PB402898.00.0 [Rattus norvegicus]                                                   | --- | 6.287 | 0.013 | 9.392 | 0.001 | 3.478  | 0.026 | 4.301 | 0.019 |
| 1389422_at   | AI180400 | Transcribed locus, moderately similar to XP_576460.1 PREDICTED: similar to hypothetical protein PB402898.00.0 [Rattus norvegicus]                                                   | --- | 0.798 | 0.138 | 0.707 | 0.005 | 0.934  | 0.172 | 0.748 | 0.016 |
| 1392616_at   | AI575519 | Transcribed locus, moderately similar to XP_576460.1 PREDICTED: similar to hypothetical protein PB402898.00.0 [Rattus norvegicus]                                                   | --- | 0.769 | 0.223 | 0.799 | 0.945 | 0.876  | 0.211 | 0.741 | 0.058 |
| 1382857_at   | BE108794 | Transcribed locus, moderately similar to XP_576460.1 PREDICTED: similar to hypothetical protein PB402898.00.0 [Rattus norvegicus]                                                   | --- | 1.235 | 0.237 | 0.826 | 0.501 | 1.305  | 0.077 | 1.103 | 0.030 |
| 1396975_at   | BI281220 | Transcribed locus, moderately similar to XP_576460.1 PREDICTED: similar to hypothetical protein PB402898.00.0 [Rattus norvegicus]                                                   | --- | 2.474 | 0.267 | 1.470 | 0.041 | 2.685  | 0.004 | 1.161 | 0.990 |
| 1374552_at   | BF412718 | Transcribed locus, moderately similar to XP_576460.1 PREDICTED: similar to hypothetical protein PB402898.00.0 [Rattus norvegicus]                                                   | --- | 0.964 | 0.393 | 0.392 | 0.008 | 1.903  | 0.000 | 0.620 | 0.006 |
| 1380856_at   | BE120542 | Transcribed locus, moderately similar to XP_576460.1 PREDICTED: similar to hypothetical protein PB402898.00.0 [Rattus norvegicus]                                                   | --- | 0.983 | 0.425 | 0.612 | 0.123 | 0.973  | 0.863 | 0.614 | 0.124 |
| 1372272_at   | BF394074 | Transcribed locus, moderately similar to XP_576460.1 PREDICTED: similar to hypothetical protein PB402898.00.0 [Rattus norvegicus]                                                   | --- | 0.753 | 0.497 | 1.012 | 0.219 | 0.662  | 0.566 | 0.814 | 0.479 |
| 1382393_at   | AI407100 | Transcribed locus, moderately similar to XP_576460.1 PREDICTED: similar to hypothetical protein PB402898.00.0 [Rattus norvegicus]                                                   | --- | 1.003 | 0.505 | 0.889 | 0.315 | 0.920  | 0.499 | 0.890 | 0.320 |
| 1379519_at   | AI171230 | Transcribed locus, moderately similar to XP_576460.1 PREDICTED: similar to hypothetical protein PB402898.00.0 [Rattus norvegicus]                                                   | --- | 0.902 | 0.641 | 0.829 | 0.005 | 1.066  | 0.671 | 0.845 | 0.292 |
| 1380487_at   | BE105524 | Transcribed locus, moderately similar to XP_576460.1 PREDICTED: similar to hypothetical protein PB402898.00.0 [Rattus norvegicus]                                                   | --- | 1.005 | 0.666 | 1.014 | 0.110 | 0.707  | 0.031 | 0.775 | 0.125 |
| 1396161_at   | BI285362 | Transcribed locus, moderately similar to XP_576460.1 PREDICTED: similar to hypothetical protein PB402898.00.0 [Rattus norvegicus]                                                   | --- | 0.987 | 0.911 | 1.003 | 0.905 | 1.121  | 0.652 | 1.101 | 0.782 |
| 1392674_at   | AI013937 | Transcribed locus, moderately similar to XP_576460.1 PREDICTED: similar to hypothetical protein PB402898.00.0 [Rattus norvegicus]                                                   | --- | 0.830 | 0.935 | 0.855 | 0.398 | 1.082  | 0.833 | 0.714 | 0.172 |
| 1384637_at   | AW535033 | Transcribed locus, moderately similar to XP_576460.1 PREDICTED: similar to hypothetical protein PB402898.00.0 [Rattus norvegicus]                                                   | --- | 1.302 | 0.959 | 0.980 | 0.745 | 1.344  | 0.889 | 1.230 | 0.877 |
| 1393656_at   | AA892817 | Transcribed locus, moderately similar to XP_576460.1 PREDICTED: similar to hypothetical protein PB402898.00.0 [Rattus norvegicus]                                                   | --- | 1.011 | 0.971 | 0.890 | 0.251 | 0.937  | 0.400 | 0.945 | 0.527 |
| 1396205_at   | BI303419 | Transcribed locus, moderately similar to XP_576460.1 PREDICTED: similar to hypothetical protein PB402898.00.0 [Rattus norvegicus]                                                   | --- | 1.005 | 0.980 | 0.864 | 0.423 | 1.641  | 0.054 | 0.872 | 0.300 |
| 1375079_at   | BE115776 | Transcribed locus, moderately similar to XP_576550.1 PREDICTED: similar to ORF2 consensus sequence encoding endonuclease and reverse transcriptase minus RNaseH [Rattus norvegicus] | --- | 1.294 | 0.982 | 1.100 | 0.161 | 1.401  | 0.407 | 1.235 | 0.509 |
| 1395994_at   | BE116471 | Transcribed locus, moderately similar to XP_578397.1 PREDICTED: similar to sentrin 17 [Rattus norvegicus]                                                                           | --- | 0.862 | 0.663 | 0.729 | 0.024 | 1.054  | 0.932 | 0.617 | 0.260 |
| 1373710_at   | BI296600 | Transcribed locus, moderately similar to XP_579384.1 PREDICTED: hypothetical protein XP_579384 [Rattus norvegicus]                                                                  | --- | 0.543 | 0.061 | 0.148 | 0.001 | 0.814  | 0.332 | 0.280 | 0.036 |
| 1395744_at   | BF291140 | Transcribed locus, moderately similar to XP_579465.1 PREDICTED: DNA binding protein N5 [Rattus norvegicus]                                                                          | --- | 2.625 | 0.017 | 1.292 | 0.242 | 2.907  | 0.016 | 1.888 | 0.013 |
| 1395260_at   | BM383147 | Transcribed locus, moderately similar to XP_579465.1 PREDICTED: DNA binding protein N5 [Rattus norvegicus]                                                                          | --- | 6.921 | 0.078 | 1.407 | 0.122 | 9.595  | 0.067 | 2.325 | 0.020 |
| 1383603_at   | BM385552 | Transcribed locus, moderately similar to XP_579465.1 PREDICTED: DNA binding protein N5 [Rattus norvegicus]                                                                          | --- | 1.927 | 0.092 | 1.673 | 0.036 | 2.817  | 0.026 | 2.053 | 0.004 |
| 1384041_at   | BG671630 | Transcribed locus, moderately similar to XP_580018.1 PREDICTED: hypothetical protein XP_580018 [Rattus norvegicus]                                                                  | --- | 1.541 | 0.003 | 1.180 | 0.717 | 1.502  | 0.092 | 0.805 | 0.681 |
| 1372911_at   | BI281950 | Transcribed locus, moderately similar to XP_580018.1 PREDICTED: hypothetical protein XP_580018 [Rattus norvegicus]                                                                  | --- | 0.408 | 0.004 | 0.979 | 0.286 | 0.483  | 0.113 | 0.760 | 0.430 |



|            |          |                                                                                                                    |     |       |       |       |       |        |       |       |       |
|------------|----------|--------------------------------------------------------------------------------------------------------------------|-----|-------|-------|-------|-------|--------|-------|-------|-------|
| 1376700_at | AI179472 | Transcribed locus, moderately similar to XP_580018.1 PREDICTED: hypothetical protein XP_580018 [Rattus norvegicus] | --- | 3.924 | 0.004 | 1.041 | 0.089 | 4.312  | 0.002 | 1.107 | 0.025 |
| 1381237_at | AW534521 | Transcribed locus, moderately similar to XP_580018.1 PREDICTED: hypothetical protein XP_580018 [Rattus norvegicus] | --- | 1.666 | 0.012 | 1.094 | 0.017 | 1.582  | 0.058 | 1.313 | 0.003 |
| 1377999_at | BE103242 | Transcribed locus, moderately similar to XP_580018.1 PREDICTED: hypothetical protein XP_580018 [Rattus norvegicus] | --- | 1.634 | 0.013 | 1.045 | 0.606 | 2.200  | 0.000 | 1.460 | 0.356 |
| 1391613_at | AW534807 | Transcribed locus, moderately similar to XP_580018.1 PREDICTED: hypothetical protein XP_580018 [Rattus norvegicus] | --- | 1.821 | 0.023 | 1.721 | 0.132 | 2.384  | 0.034 | 1.254 | 0.448 |
| 1383169_at | BF563716 | Transcribed locus, moderately similar to XP_580018.1 PREDICTED: hypothetical protein XP_580018 [Rattus norvegicus] | --- | 1.374 | 0.032 | 0.586 | 0.003 | 2.124  | 0.000 | 0.665 | 0.022 |
| 1397463_at | BE105818 | Transcribed locus, moderately similar to XP_580018.1 PREDICTED: hypothetical protein XP_580018 [Rattus norvegicus] | --- | 1.597 | 0.049 | 1.448 | 0.084 | 1.933  | 0.096 | 0.890 | 0.403 |
| 1385569_at | BF559640 | Transcribed locus, moderately similar to XP_580018.1 PREDICTED: hypothetical protein XP_580018 [Rattus norvegicus] | --- | 8.241 | 0.066 | 3.953 | 0.004 | 13.523 | 0.052 | 7.751 | 0.002 |
| 1377556_at | AW535380 | Transcribed locus, moderately similar to XP_580018.1 PREDICTED: hypothetical protein XP_580018 [Rattus norvegicus] | --- | 0.802 | 0.084 | 0.472 | 0.004 | 0.664  | 0.703 | 0.605 | 0.020 |
| 1394437_at | AI407319 | Transcribed locus, moderately similar to XP_580018.1 PREDICTED: hypothetical protein XP_580018 [Rattus norvegicus] | --- | 1.922 | 0.089 | 1.418 | 0.461 | 1.560  | 0.090 | 1.082 | 0.550 |
| 1384845_at | AI176044 | Transcribed locus, moderately similar to XP_580018.1 PREDICTED: hypothetical protein XP_580018 [Rattus norvegicus] | --- | 2.144 | 0.089 | 1.321 | 0.490 | 2.675  | 0.012 | 1.328 | 0.278 |
| 1383085_at | BG672648 | Transcribed locus, moderately similar to XP_580018.1 PREDICTED: hypothetical protein XP_580018 [Rattus norvegicus] | --- | 2.283 | 0.096 | 0.433 | 0.081 | 1.237  | 0.519 | 0.274 | 0.017 |
| 1381643_at | AW536050 | Transcribed locus, moderately similar to XP_580018.1 PREDICTED: hypothetical protein XP_580018 [Rattus norvegicus] | --- | 1.420 | 0.110 | 0.998 | 0.968 | 1.929  | 0.112 | 1.153 | 0.218 |
| 1398409_at | AA850428 | Transcribed locus, moderately similar to XP_580018.1 PREDICTED: hypothetical protein XP_580018 [Rattus norvegicus] | --- | 1.151 | 0.147 | 1.550 | 0.045 | 1.222  | 0.083 | 1.168 | 0.110 |
| 1379941_at | BM384685 | Transcribed locus, moderately similar to XP_580018.1 PREDICTED: hypothetical protein XP_580018 [Rattus norvegicus] | --- | 1.487 | 0.158 | 0.630 | 0.236 | 2.119  | 0.059 | 0.739 | 0.348 |
| 1393146_at | BG663116 | Transcribed locus, moderately similar to XP_580018.1 PREDICTED: hypothetical protein XP_580018 [Rattus norvegicus] | --- | 0.617 | 0.210 | 0.555 | 0.061 | 0.679  | 0.062 | 0.596 | 0.062 |
| 1380477_at | BE112382 | Transcribed locus, moderately similar to XP_580018.1 PREDICTED: hypothetical protein XP_580018 [Rattus norvegicus] | --- | 0.910 | 0.213 | 1.628 | 0.673 | 1.709  | 0.089 | 1.099 | 0.897 |
| 1376129_at | BE108174 | Transcribed locus, moderately similar to XP_580018.1 PREDICTED: hypothetical protein XP_580018 [Rattus norvegicus] | --- | 1.211 | 0.218 | 0.781 | 0.056 | 0.935  | 0.193 | 0.776 | 0.207 |
| 1374607_at | AI599854 | Transcribed locus, moderately similar to XP_580018.1 PREDICTED: hypothetical protein XP_580018 [Rattus norvegicus] | --- | 0.825 | 0.225 | 0.445 | 0.001 | 0.674  | 0.240 | 0.594 | 0.026 |
| 1374278_at | BG381647 | Transcribed locus, moderately similar to XP_580018.1 PREDICTED: hypothetical protein XP_580018 [Rattus norvegicus] | --- | 0.436 | 0.265 | 0.703 | 0.466 | 0.242  | 0.024 | 0.334 | 0.093 |
| 1373178_at | AA945183 | Transcribed locus, moderately similar to XP_580018.1 PREDICTED: hypothetical protein XP_580018 [Rattus norvegicus] | --- | 1.583 | 0.294 | 0.469 | 0.003 | 1.717  | 0.016 | 0.598 | 0.042 |
| 1386032_at | BF288135 | Transcribed locus, moderately similar to XP_580018.1 PREDICTED: hypothetical protein XP_580018 [Rattus norvegicus] | --- | 1.673 | 0.309 | 0.891 | 0.983 | 1.039  | 0.980 | 0.995 | 0.965 |
| 1378231_at | BI300425 | Transcribed locus, moderately similar to XP_580018.1 PREDICTED: hypothetical protein XP_580018 [Rattus norvegicus] | --- | 1.015 | 0.318 | 0.798 | 0.196 | 1.708  | 0.062 | 0.745 | 0.105 |
| 1382004_at | AI175827 | Transcribed locus, moderately similar to XP_580018.1 PREDICTED: hypothetical protein XP_580018 [Rattus norvegicus] | --- | 0.999 | 0.322 | 0.823 | 0.344 | 0.907  | 0.165 | 0.732 | 0.087 |
| 1389896_at | AI232217 | Transcribed locus, moderately similar to XP_580018.1 PREDICTED: hypothetical protein XP_580018 [Rattus norvegicus] | --- | 0.754 | 0.356 | 0.328 | 0.001 | 1.259  | 0.078 | 0.475 | 0.004 |
| 1379825_at | AI112993 | Transcribed locus, moderately similar to XP_580018.1 PREDICTED: hypothetical protein XP_580018 [Rattus norvegicus] | --- | 1.427 | 0.359 | 1.065 | 0.672 | 1.277  | 0.375 | 1.403 | 0.724 |
| 1374298_at | BG373455 | Transcribed locus, moderately similar to XP_580018.1 PREDICTED: hypothetical protein XP_580018 [Rattus norvegicus] | --- | 1.293 | 0.362 | 0.441 | 0.015 | 8.291  | 0.026 | 1.734 | 0.031 |
| 1383545_at | BF562608 | Transcribed locus, moderately similar to XP_580018.1 PREDICTED: hypothetical protein XP_580018 [Rattus norvegicus] | --- | 0.671 | 0.432 | 1.003 | 0.686 | 0.545  | 0.056 | 0.834 | 0.157 |
| 1383142_at | BI289244 | Transcribed locus, moderately similar to XP_580018.1 PREDICTED: hypothetical protein XP_580018 [Rattus norvegicus] | --- | 1.114 | 0.511 | 1.384 | 0.005 | 0.660  | 0.016 | 1.205 | 0.405 |
| 1386031_at | BF288135 | Transcribed locus, moderately similar to XP_580018.1 PREDICTED: hypothetical protein XP_580018 [Rattus norvegicus] | --- | 1.149 | 0.535 | 0.863 | 0.508 | 1.262  | 0.009 | 0.989 | 0.957 |
| 1384605_at | BF419162 | Transcribed locus, moderately similar to XP_580018.1 PREDICTED: hypothetical protein XP_580018 [Rattus norvegicus] | --- | 1.108 | 0.586 | 1.074 | 0.709 | 1.816  | 0.493 | 1.143 | 0.391 |

|              |          |                                                                                                                                                                                                            |     |       |       |       |       |       |       |       |       |
|--------------|----------|------------------------------------------------------------------------------------------------------------------------------------------------------------------------------------------------------------|-----|-------|-------|-------|-------|-------|-------|-------|-------|
| 1372187_at   | AA945751 | Transcribed locus, moderately similar to XP_580018.1 PREDICTED: hypothetical protein XP_580018 [Rattus norvegicus]                                                                                         | --- | 0.889 | 0.617 | 1.018 | 0.613 | 0.769 | 0.377 | 1.412 | 0.037 |
| 1383012_at   | BE115155 | Transcribed locus, moderately similar to XP_580018.1 PREDICTED: hypothetical protein XP_580018 [Rattus norvegicus]                                                                                         | --- | 1.130 | 0.627 | 1.920 | 0.001 | 0.933 | 0.635 | 1.322 | 0.146 |
| 1382256_at   | AI011445 | Transcribed locus, moderately similar to XP_580018.1 PREDICTED: hypothetical protein XP_580018 [Rattus norvegicus]                                                                                         | --- | 1.276 | 0.629 | 1.460 | 0.249 | 0.970 | 0.602 | 1.238 | 0.147 |
| 1398454_at   | BM389272 | Transcribed locus, moderately similar to XP_580018.1 PREDICTED: hypothetical protein XP_580018 [Rattus norvegicus]                                                                                         | --- | 1.090 | 0.633 | 0.836 | 0.131 | 1.032 | 0.787 | 0.618 | 0.038 |
| 1374193_at   | BI303636 | Transcribed locus, moderately similar to XP_580018.1 PREDICTED: hypothetical protein XP_580018 [Rattus norvegicus]                                                                                         | --- | 1.579 | 0.651 | 1.063 | 0.133 | 2.550 | 0.039 | 1.406 | 0.767 |
| 1399142_at   | BF398045 | Transcribed locus, moderately similar to XP_580018.1 PREDICTED: hypothetical protein XP_580018 [Rattus norvegicus]                                                                                         | --- | 0.880 | 0.652 | 0.483 | 0.003 | 0.904 | 0.214 | 0.503 | 0.003 |
| 1377310_at   | BG374304 | Transcribed locus, moderately similar to XP_580018.1 PREDICTED: hypothetical protein XP_580018 [Rattus norvegicus]                                                                                         | --- | 0.701 | 0.662 | 0.487 | 0.002 | 1.245 | 0.011 | 0.607 | 0.060 |
| 1374753_at   | AI105113 | Transcribed locus, moderately similar to XP_580018.1 PREDICTED: hypothetical protein XP_580018 [Rattus norvegicus]                                                                                         | --- | 0.988 | 0.710 | 0.681 | 0.047 | 1.034 | 0.961 | 0.712 | 0.133 |
| 1394820_at   | AI704849 | Transcribed locus, moderately similar to XP_580018.1 PREDICTED: hypothetical protein XP_580018 [Rattus norvegicus]                                                                                         | --- | 1.322 | 0.731 | 0.759 | 0.384 | 1.468 | 0.243 | 0.936 | 0.812 |
| 1382703_at   | BE099893 | Transcribed locus, moderately similar to XP_580018.1 PREDICTED: hypothetical protein XP_580018 [Rattus norvegicus]                                                                                         | --- | 0.567 | 0.734 | 0.726 | 0.224 | 0.836 | 0.648 | 0.690 | 0.036 |
| 1383987_at   | AI112807 | Transcribed locus, moderately similar to XP_580018.1 PREDICTED: hypothetical protein XP_580018 [Rattus norvegicus]                                                                                         | --- | 1.048 | 0.794 | 0.915 | 0.168 | 2.035 | 0.983 | 1.481 | 0.038 |
| 1379933_at   | AI409737 | Transcribed locus, moderately similar to XP_580018.1 PREDICTED: hypothetical protein XP_580018 [Rattus norvegicus]                                                                                         | --- | 0.998 | 0.808 | 1.002 | 0.981 | 0.974 | 0.982 | 0.999 | 0.979 |
| 1394773_at   | BG378318 | Transcribed locus, moderately similar to XP_580018.1 PREDICTED: hypothetical protein XP_580018 [Rattus norvegicus]                                                                                         | --- | 1.058 | 0.908 | 1.199 | 0.775 | 1.016 | 0.972 | 1.229 | 0.825 |
| 1397384_at   | BM391073 | Transcribed locus, moderately similar to XP_580018.1 PREDICTED: hypothetical protein XP_580018 [Rattus norvegicus]                                                                                         | --- | 1.251 | 0.910 | 0.700 | 0.017 | 1.298 | 0.991 | 0.753 | 0.022 |
| 1379547_at   | AA964652 | Transcribed locus, moderately similar to XP_580018.1 PREDICTED: hypothetical protein XP_580018 [Rattus norvegicus]                                                                                         | --- | 1.132 | 0.912 | 1.007 | 0.818 | 1.559 | 0.074 | 1.933 | 0.050 |
| 1395220_at   | AI556467 | Transcribed locus, moderately similar to XP_580018.1 PREDICTED: hypothetical protein XP_580018 [Rattus norvegicus]                                                                                         | --- | 1.174 | 0.928 | 1.111 | 0.715 | 1.594 | 0.134 | 0.899 | 0.896 |
| 1398587_at   | AA860035 | Transcribed locus, moderately similar to XP_580018.1 PREDICTED: hypothetical protein XP_580018 [Rattus norvegicus]                                                                                         | --- | 0.831 | 0.954 | 0.518 | 0.000 | 1.196 | 0.149 | 0.560 | 0.079 |
| 1395395_at   | BF291053 | Transcribed locus, moderately similar to XP_580018.1 PREDICTED: hypothetical protein XP_580018 [Rattus norvegicus]                                                                                         | --- | 1.001 | 0.988 | 0.844 | 0.015 | 1.003 | 0.983 | 1.005 | 0.217 |
| 1384359_at   | BF407520 | Transcribed locus, moderately similar to XP_618803.1 PREDICTED: similar to ATP synthase, H <sup>+</sup> transporting, mitochondrial F0 complex, subunit G [Mus musculus]                                   | --- | 1.030 | 0.835 | 0.899 | 0.189 | 1.030 | 0.978 | 1.000 | 0.383 |
| 1377238_at   | BM386889 | Transcribed locus, moderately similar to XP_860663.1 PREDICTED: similar to GMP reductase 2 (Guanosine 5-monophosphate oxidoreductase 2) (Guanosine monophosphate reductase 2) isoform 6 [Canis familiaris] | --- | 0.506 | 0.076 | 0.213 | 0.002 | 0.683 | 0.392 | 0.395 | 0.010 |
| 1372716_at   | BF284207 | Transcribed locus, moderately similar to XP_866446.1 PREDICTED: similar to chromosome 18 open reading frame 25 isoform b isoform 2 [Canis familiaris]                                                      | --- | 0.896 | 0.236 | 1.041 | 0.862 | 0.940 | 0.612 | 0.999 | 0.452 |
| 1371468_at   | BI296378 | Transcribed locus, strongly similar to NP_001003955.1 RAB11 family interacting protein 5 (class I) isoform 1 [Mus musculus]                                                                                | --- | 1.001 | 0.990 | 1.002 | 0.948 | 0.999 | 0.997 | 1.000 | 0.997 |
| 1383405_at   | AW254703 | Transcribed locus, strongly similar to NP_001005420.1 hypothetical protein LOC241289 [Mus musculus]                                                                                                        | --- | 0.648 | 0.321 | 0.510 | 0.006 | 0.436 | 0.029 | 0.551 | 0.082 |
| 1382174_at   | AI227996 | Transcribed locus, strongly similar to NP_006210.1 phosphoinositide-3-kinase, catalytic, beta polypeptide [Homo sapiens]                                                                                   | --- | 3.081 | 0.037 | 1.378 | 0.032 | 3.576 | 0.506 | 0.790 | 0.195 |
| 1398037_at   | BF390325 | Transcribed locus, strongly similar to NP_006613.1 polo-like kinase 2 [Homo sapiens]                                                                                                                       | --- | 1.553 | 0.605 | 1.008 | 0.208 | 1.884 | 0.207 | 1.271 | 0.256 |
| 1384239_at   | AA818474 | Transcribed locus, strongly similar to NP_008994.1 TBC1 domain family, member 8 [Homo sapiens]                                                                                                             | --- | 1.021 | 0.672 | 1.159 | 0.045 | 1.181 | 0.293 | 1.015 | 0.631 |
| 1388763_at   | AI230762 | Transcribed locus, strongly similar to NP_031751.1 calponin 2 [Mus musculus]                                                                                                                               | --- | 1.979 | 0.012 | 4.957 | 0.015 | 2.403 | 0.055 | 4.469 | 0.018 |
| 1371981_at   | BI294700 | Transcribed locus, strongly similar to NP_031860.1 Down syndrome critical region protein A [Mus musculus]                                                                                                  | --- | 1.866 | 0.009 | 2.322 | 0.050 | 0.835 | 0.464 | 1.434 | 0.070 |
| 1373735_at   | BG372418 | Transcribed locus, strongly similar to NP_031975.2 excision repair cross-complementing rodent repair deficiency, complementation group 2 [Mus musculus]                                                    | --- | 0.680 | 0.345 | 0.993 | 0.985 | 1.145 | 0.122 | 0.767 | 0.090 |
| 1372089_at   | AI171222 | Transcribed locus, strongly similar to NP_032322.1 heat shock factor 1 [Mus musculus]                                                                                                                      | --- | 1.186 | 0.163 | 1.185 | 0.207 | 1.112 | 0.270 | 1.076 | 0.543 |
| 1393836_at   | BE097933 | Transcribed locus, strongly similar to NP_032627.1 microphthalmia-associated transcription factor [Mus musculus]                                                                                           | --- | 0.896 | 0.616 | 0.724 | 0.577 | 2.724 | 0.021 | 1.213 | 0.511 |
| 1397872_at   | AI577099 | Transcribed locus, strongly similar to NP_033413.1 thymidine kinase 1 [Mus musculus]                                                                                                                       | --- | 1.138 | 0.032 | 0.914 | 0.722 | 1.090 | 0.943 | 1.527 | 0.471 |
| 1399166_a_at | BF420294 | Transcribed locus, strongly similar to NP_033875.1 B-cell CLL/lymphoma 7B [Mus musculus]                                                                                                                   | --- | 0.784 | 0.922 | 1.625 | 0.189 | 0.884 | 0.492 | 1.110 | 0.551 |
| 1372484_at   | AI176231 | Transcribed locus, strongly similar to NP_035242.1 poly (A) polymerase alpha [Mus musculus]                                                                                                                | --- | 0.706 | 0.047 | 0.290 | 0.000 | 0.952 | 0.309 | 0.426 | 0.018 |
| 1382154_at   | BI289625 | Transcribed locus, strongly similar to NP_035333.2 protein tyrosine phosphatase, non-receptor type 12 [Mus musculus]                                                                                       | --- | 2.460 | 0.004 | 1.791 | 0.003 | 2.307 | 0.004 | 1.854 | 0.019 |

|              |          |                                                                                                                                      |     |       |       |       |       |       |       |       |       |
|--------------|----------|--------------------------------------------------------------------------------------------------------------------------------------|-----|-------|-------|-------|-------|-------|-------|-------|-------|
| 1376101_at   | AI228256 | Transcribed locus, strongly similar to NP_035543.1 sex-limited protein [Mus musculus]                                                | --- | 0.918 | 0.595 | 0.650 | 0.023 | 0.948 | 0.694 | 0.750 | 0.011 |
| 1372318_at   | AI235528 | Transcribed locus, strongly similar to NP_035560.1 synuclein, gamma [Mus musculus]                                                   | --- | 0.077 | 0.009 | 0.040 | 0.006 | 0.076 | 0.003 | 0.034 | 0.001 |
| 1388690_at   | AI105439 | Transcribed locus, strongly similar to NP_035720.1 translocator of inner mitochondrial membrane 17a [Mus musculus]                   | --- | 1.043 | 0.876 | 0.473 | 0.014 | 0.992 | 0.768 | 0.512 | 0.014 |
| 1395532_at   | AI137456 | Transcribed locus, strongly similar to NP_035873.1 SH3-domain binding protein 3 [Mus musculus]                                       | --- | 0.799 | 0.319 | 0.881 | 0.133 | 0.660 | 0.128 | 0.743 | 0.343 |
| 1371794_at   | BM391449 | Transcribed locus, strongly similar to NP_035873.1 SH3-domain binding protein 3 [Mus musculus]                                       | --- | 0.805 | 0.817 | 0.925 | 0.275 | 0.907 | 0.362 | 0.960 | 0.510 |
| 1381012_at   | BI303349 | Transcribed locus, strongly similar to NP_035920.1 ariadne homolog 2 [Mus musculus]                                                  | --- | 1.091 | 0.886 | 0.688 | 0.752 | 1.046 | 0.685 | 0.960 | 0.768 |
| 1375172_at   | AA850517 | Transcribed locus, strongly similar to NP_036061.1 constitutive photomorphogenic protein 1 [Mus musculus]                            | --- | 1.166 | 0.593 | 0.846 | 0.873 | 1.028 | 0.936 | 1.059 | 0.850 |
| 1373673_at   | BF284593 | Transcribed locus, strongly similar to NP_037230.1 glucose-6-phosphatase, catalytic [Rattus norvegicus]                              | --- | 0.929 | 0.810 | 0.745 | 0.007 | 1.035 | 0.064 | 0.744 | 0.055 |
| 1396512_at   | BF393192 | Transcribed locus, strongly similar to NP_062039.1 synaptogyrin 1 [Rattus norvegicus]                                                | --- | 0.985 | 0.881 | 0.258 | 0.070 | 0.695 | 0.286 | 0.274 | 0.079 |
| 1398617_at   | BE098167 | Transcribed locus, strongly similar to NP_062613.2 ubiquitin C [Mus musculus]                                                        | --- | 0.982 | 0.267 | 1.095 | 0.502 | 1.414 | 0.660 | 0.686 | 0.108 |
| 1371699_at   | BI295739 | Transcribed locus, strongly similar to NP_064456.1 fibrinogen, beta polypeptide [Rattus norvegicus]                                  | --- | 1.988 | 0.001 | 1.511 | 0.006 | 1.415 | 0.086 | 1.060 | 0.122 |
| 1373166_at   | BM391823 | Transcribed locus, strongly similar to NP_064456.1 fibrinogen, beta polypeptide [Rattus norvegicus]                                  | --- | 1.664 | 0.066 | 1.476 | 0.137 | 1.312 | 0.104 | 0.883 | 0.397 |
| 1372041_at   | BI290059 | Transcribed locus, strongly similar to NP_066943.1 synapse-associated protein 102 [Homo sapiens]                                     | --- | 0.634 | 0.112 | 0.279 | 0.006 | 0.417 | 0.065 | 0.231 | 0.024 |
| 1393184_at   | BF420805 | Transcribed locus, strongly similar to NP_068778.1 protein phosphatase 1, regulatory (inhibitor) subunit 11 isoform 1 [Homo sapiens] | --- | 0.902 | 0.628 | 0.541 | 0.033 | 0.963 | 0.871 | 0.454 | 0.001 |
| 1376421_at   | BI278838 | Transcribed locus, strongly similar to NP_075230.1 nuclear receptor subfamily 1, group I, member 3 [Rattus norvegicus]               | --- | 0.365 | 0.119 | 0.372 | 0.004 | 0.426 | 0.044 | 0.228 | 0.065 |
| 1382087_at   | BE109382 | Transcribed locus, strongly similar to NP_076005.1 hypoxia-inducible protein 2 [Mus musculus]                                        | --- | 0.813 | 0.136 | 6.674 | 0.000 | 1.310 | 0.079 | 5.901 | 0.001 |
| 1388692_at   | AI411102 | Transcribed locus, strongly similar to NP_079814.1 spermatogenesis associated 11 [Mus musculus]                                      | --- | 0.790 | 0.964 | 1.003 | 0.722 | 0.954 | 0.557 | 1.078 | 0.308 |
| 1374877_at   | AI112752 | Transcribed locus, strongly similar to NP_079892.1 translocase of inner mitochondrial membrane 50 homolog [Mus musculus]             | --- | 0.616 | 0.026 | 1.484 | 0.069 | 0.501 | 0.076 | 1.217 | 0.710 |
| 1373235_at   | AA892370 | Transcribed locus, strongly similar to NP_080208.1 synapse associated protein 1 [Mus musculus]                                       | --- | 0.786 | 0.741 | 1.223 | 0.247 | 0.896 | 0.465 | 1.233 | 0.010 |
| 1386253_at   | AA800290 | Transcribed locus, strongly similar to NP_080395.1 vitamin D receptor interacting protein [Mus musculus]                             | --- | 0.986 | 0.896 | 1.795 | 0.102 | 0.653 | 0.949 | 1.043 | 0.713 |
| 1386180_at   | AI178132 | Transcribed locus, strongly similar to NP_080601.1 hypothetical protein LOC67706 [Mus musculus]                                      | --- | 0.987 | 0.997 | 0.963 | 0.461 | 0.978 | 0.878 | 0.999 | 0.630 |
| 1374583_at   | BI288131 | Transcribed locus, strongly similar to NP_081306.1 histidine triad protein member 5 [Mus musculus]                                   | --- | 0.789 | 0.625 | 0.727 | 0.124 | 0.810 | 0.647 | 1.125 | 0.831 |
| 1384311_at   | BE113314 | Transcribed locus, strongly similar to NP_081823.1 PR domain containing 5 [Mus musculus]                                             | --- | 2.826 | 0.098 | 1.717 | 0.105 | 1.632 | 0.084 | 0.971 | 0.928 |
| 1399100_at   | BF396192 | Transcribed locus, strongly similar to NP_082675.1 cyclin T2 [Mus musculus]                                                          | --- | 1.355 | 0.018 | 1.229 | 0.380 | 1.387 | 0.231 | 1.150 | 0.762 |
| 1388689_at   | AI170755 | Transcribed locus, strongly similar to NP_083620.1 acylphosphatase 2, muscle type [Mus musculus]                                     | --- | 0.885 | 0.707 | 0.294 | 0.013 | 0.897 | 0.763 | 0.465 | 0.036 |
| 1392663_at   | AI179925 | Transcribed locus, strongly similar to NP_083924.2 hypothetical protein LOC76539 [Mus musculus]                                      | --- | 0.395 | 0.057 | 0.656 | 0.001 | 0.417 | 0.008 | 0.592 | 0.027 |
| 1374541_at   | BM392117 | Transcribed locus, strongly similar to NP_109603.2 glycogen synthase 1, muscle [Mus musculus]                                        | --- | 0.931 | 0.996 | 6.471 | 0.001 | 1.151 | 0.784 | 2.563 | 0.008 |
| 1382649_at   | AI030649 | Transcribed locus, strongly similar to NP_112381.2 Sjogren syndrome antigen B [Rattus norvegicus]                                    | --- | 0.964 | 0.695 | 0.967 | 0.187 | 1.199 | 0.136 | 1.100 | 0.082 |
| 1374138_at   | BG378169 | Transcribed locus, strongly similar to NP_112574.3 ADP-dependent glucokinase [Homo sapiens]                                          | --- | 0.999 | 0.934 | 0.922 | 0.936 | 1.014 | 0.902 | 0.921 | 0.999 |
| 1371324_at   | BG673668 | Transcribed locus, strongly similar to NP_112577.1 SF3b10 [Homo sapiens]                                                             | --- | 0.835 | 0.980 | 0.573 | 0.162 | 0.740 | 0.753 | 0.374 | 0.066 |
| 1382422_at   | AA956340 | Transcribed locus, strongly similar to NP_115833.1 protocadherin 7 isoform c precursor [Homo sapiens]                                | --- | 0.802 | 0.835 | 0.815 | 0.037 | 0.976 | 0.696 | 1.143 | 0.630 |
| 1385008_at   | AA925373 | Transcribed locus, strongly similar to NP_115833.1 protocadherin 7 isoform c precursor [Homo sapiens]                                | --- | 1.246 | 0.998 | 0.851 | 0.590 | 1.538 | 0.169 | 1.444 | 0.081 |
| 1379332_at   | AI556426 | Transcribed locus, strongly similar to NP_361014.1 F-box protein FBW7 isoform 1 [Homo sapiens]                                       | --- | 0.819 | 0.507 | 1.400 | 0.057 | 0.786 | 0.407 | 1.108 | 0.367 |
| 1373120_at   | BM389931 | Transcribed locus, strongly similar to NP_446127.3 spermatogenesis associated 2 [Rattus norvegicus]                                  | --- | 1.322 | 0.731 | 1.296 | 0.233 | 1.108 | 0.909 | 1.117 | 0.082 |
| 1383536_at   | AI712541 | Transcribed locus, strongly similar to NP_569084.1 dihydrofolate reductase [Rattus norvegicus]                                       | --- | 1.249 | 0.934 | 1.158 | 0.861 | 1.006 | 0.504 | 1.513 | 0.773 |
| 1374458_at   | AI600031 | Transcribed locus, strongly similar to NP_573483.1 serum/glucocorticoid regulated kinase 3 [Mus musculus]                            | --- | 0.535 | 0.032 | 0.396 | 0.015 | 0.741 | 0.222 | 0.831 | 0.359 |
| 1380148_at   | BE118688 | Transcribed locus, strongly similar to NP_579890.1 Wolf-Hirschhorn syndrome candidate 1 protein isoform 1 [Homo sapiens]             | --- | 1.020 | 0.933 | 1.237 | 0.097 | 1.303 | 0.218 | 1.029 | 0.203 |
| 1393168_at   | BF398450 | Transcribed locus, strongly similar to NP_598773.1 mbt domain containing 1 [Mus musculus]                                            | --- | 1.065 | 0.911 | 0.823 | 0.054 | 1.684 | 0.150 | 0.778 | 0.054 |
| 1386750_at   | BF290862 | Transcribed locus, strongly similar to NP_666196.1 expressed sequence AW060714 [Mus musculus]                                        | --- | 1.149 | 0.050 | 2.313 | 0.009 | 1.057 | 0.234 | 2.042 | 0.007 |
| 1373652_at   | BG374986 | Transcribed locus, strongly similar to NP_666217.2 hypothetical protein LOC226744 [Mus musculus]                                     | --- | 0.671 | 0.089 | 0.559 | 0.010 | 0.484 | 0.057 | 0.624 | 0.009 |
| 1391623_at   | AI706933 | Transcribed locus, strongly similar to NP_666224.2 Grb10 interacting GYF protein 2 [Mus musculus]                                    | --- | 0.942 | 0.895 | 0.862 | 0.351 | 0.762 | 0.185 | 0.801 | 0.097 |
| 1383670_at   | BM383134 | Transcribed locus, strongly similar to NP_666333.1 zinc finger protein 426 [Mus musculus]                                            | --- | 0.997 | 0.057 | 0.672 | 0.031 | 0.888 | 0.604 | 0.784 | 0.129 |
| 1389633_at   | BI290172 | Transcribed locus, strongly similar to NP_683754.1 E2F transcription factor 4 [Mus musculus]                                         | --- | 0.856 | 0.454 | 2.221 | 0.006 | 0.791 | 0.192 | 1.968 | 0.010 |
| 1372178_at   | BM385981 | Transcribed locus, strongly similar to NP_695208.1 serine/threonine protein kinase 6 [Rattus norvegicus]                             | --- | 2.225 | 0.018 | 1.874 | 0.053 | 2.747 | 0.012 | 1.832 | 0.005 |
| 1398386_at   | AW915951 | Transcribed locus, strongly similar to NP_705766.2 zinc finger, CCHC domain containing 6 [Mus musculus]                              | --- | 1.518 | 0.549 | 1.008 | 0.744 | 1.344 | 0.157 | 1.004 | 0.786 |
| 1382248_at   | BI292769 | Transcribed locus, strongly similar to NP_705773.1 leucine rich repeat containing 45 [Mus musculus]                                  | --- | 0.458 | 0.012 | 0.648 | 0.083 | 0.549 | 0.755 | 0.320 | 0.185 |
| 1376021_at   | BM384049 | Transcribed locus, strongly similar to NP_705773.1 leucine rich repeat containing 45 [Mus musculus]                                  | --- | 1.545 | 0.114 | 1.881 | 0.005 | 1.256 | 0.373 | 2.005 | 0.001 |
| 1383357_a_at | BF403558 | Transcribed locus, strongly similar to NP_722482.1 BCL2-associated transcription factor 1 isoform 2 [Mus musculus]                   | --- | 1.659 | 0.061 | 1.594 | 0.001 | 1.198 | 0.196 | 1.524 | 0.001 |
| 1389771_at   | AI013885 | Transcribed locus, strongly similar to NP_766314.2 hypothetical protein LOC231868 [Mus musculus]                                     | --- | 0.647 | 0.027 | 0.908 | 0.249 | 0.729 | 0.017 | 0.881 | 0.580 |
| 1373950_at   | AI598911 | Transcribed locus, strongly similar to NP_766529.2 zinc finger protein 496 [Mus musculus]                                            | --- | 1.017 | 0.824 | 2.850 | 0.003 | 1.109 | 0.983 | 2.036 | 0.004 |
| 1384517_at   | BF420144 | Transcribed locus, strongly similar to NP_766529.2 zinc finger protein 496 [Mus musculus]                                            | --- | 1.005 | 0.973 | 1.971 | 0.133 | 1.000 | 0.978 | 1.093 | 0.752 |
| 1383373_at   | AI576635 | Transcribed locus, strongly similar to NP_766590.1 ZXD family zinc finger C isoform 2 [Mus musculus]                                 | --- | 1.377 | 0.139 | 0.695 | 0.127 | 1.307 | 0.017 | 0.887 | 0.372 |
| 1383800_at   | AW523537 | Transcribed locus, strongly similar to NP_775622.1 transmembrane protein 28 [Mus musculus]                                           | --- | 0.890 | 0.917 | 0.432 | 0.000 | 0.980 | 0.371 | 0.662 | 0.015 |
| 1394417_at   | BF396165 | Transcribed locus, strongly similar to NP_786941.1 PC4 and SFRS1 interacting protein 1 [Rattus norvegicus]                           | --- | 0.667 | 0.490 | 0.546 | 0.339 | 0.690 | 0.378 | 0.619 | 0.170 |
| 1372690_at   | AI137471 | Transcribed locus, strongly similar to NP_808376.1 reticulon 4 receptor-like 1 [Mus musculus]                                        | --- | 0.363 | 0.004 | 0.858 | 0.440 | 0.477 | 0.073 | 0.500 | 0.022 |

|              |          |                                                                                                                                                                                                                                                                    |     |        |       |       |       |        |       |        |       |
|--------------|----------|--------------------------------------------------------------------------------------------------------------------------------------------------------------------------------------------------------------------------------------------------------------------|-----|--------|-------|-------|-------|--------|-------|--------|-------|
| 1393404_at   | BF554746 | Transcribed locus, strongly similar to NP_808376.1 reticulon 4 receptor-like 1 [Mus musculus]                                                                                                                                                                      | --- | 0.420  | 0.012 | 0.751 | 0.724 | 0.268  | 0.004 | 0.752  | 0.411 |
| 1393808_at   | AW527783 | Transcribed locus, strongly similar to NP_835187.1 fatty acid 2-hydroxylase [Mus musculus]                                                                                                                                                                         | --- | 1.008  | 0.910 | 1.007 | 0.861 | 0.889  | 0.023 | 0.968  | 0.975 |
| 1373649_at   | AI453889 | Transcribed locus, strongly similar to NP_848466.1 COX10 homolog, cytochrome c oxidase assembly protein, heme A: farnesyltransferase [Mus musculus]                                                                                                                | --- | 0.996  | 0.953 | 0.969 | 0.813 | 0.754  | 0.969 | 0.963  | 0.831 |
| 1395285_at   | BE108376 | Transcribed locus, strongly similar to NP_940969.1 hypothetical protein LOC375484 [Homo sapiens]                                                                                                                                                                   | --- | 0.673  | 0.090 | 1.257 | 0.074 | 0.451  | 0.004 | 1.051  | 0.247 |
| 1377002_at   | AA946209 | Transcribed locus, strongly similar to XP_213649.3 PREDICTED: similar to interferon alpha/beta receptor [Rattus norvegicus]                                                                                                                                        | --- | 1.314  | 0.917 | 0.885 | 0.676 | 1.006  | 0.502 | 0.710  | 0.144 |
| 1397307_at   | BF555100 | Transcribed locus, strongly similar to XP_213790.3 PREDICTED: similar to Tescalcin [Rattus norvegicus]                                                                                                                                                             | --- | 1.761  | 0.212 | 0.341 | 0.038 | 0.895  | 0.103 | 0.467  | 0.485 |
| 1380605_at   | BM387149 | Transcribed locus, strongly similar to XP_213842.2 PREDICTED: similar to Gadd45gip1_predicted protein [Rattus norvegicus]                                                                                                                                          | --- | 0.997  | 0.736 | 1.006 | 0.945 | 1.103  | 0.118 | 1.000  | 0.998 |
| 1391206_at   | AW533313 | Transcribed locus, strongly similar to XP_213984.3 PREDICTED: similar to RIKEN cDNA 5730559C18 [Rattus norvegicus]                                                                                                                                                 | --- | 1.995  | 0.016 | 1.443 | 0.677 | 1.516  | 0.003 | 0.886  | 0.500 |
| 1377897_at   | AI231330 | Transcribed locus, strongly similar to XP_214371.3 PREDICTED: similar to WHSC1L1 protein isoform long [Rattus norvegicus]                                                                                                                                          | --- | 0.671  | 0.076 | 0.884 | 0.974 | 0.651  | 0.308 | 0.978  | 0.809 |
| 1389172_at   | AI179391 | Transcribed locus, strongly similar to XP_214403.2 PREDICTED: similar to N(4)-(beta-N-acetylglucosaminy)-L-asparaginase precursor (Glycosylasparaginase) (Aspartylglucosaminidase) (N4-(N-acetyl-beta-glucosaminy)-L-asparagine amidase) (AGA) [Rattus norvegicus] | --- | 1.801  | 0.137 | 1.565 | 0.011 | 1.986  | 0.021 | 1.414  | 0.140 |
| 1376258_at   | AI406785 | Transcribed locus, strongly similar to XP_214459.3 PREDICTED: similar to serine (or cysteine) proteinase inhibitor, clade B, member 1b [Rattus norvegicus]                                                                                                         | --- | 0.995  | 0.677 | 0.992 | 0.911 | 0.999  | 0.970 | 0.996  | 0.949 |
| 1367518_at   | BI274976 | Transcribed locus, strongly similar to XP_214652.3 PREDICTED: similar to Fatso [Rattus norvegicus]                                                                                                                                                                 | --- | 0.591  | 0.389 | 0.906 | 0.550 | 0.492  | 0.008 | 0.856  | 0.494 |
| 1381248_at   | AI763874 | Transcribed locus, strongly similar to XP_215477.3 PREDICTED: similar to RIKEN cDNA 1500031M22 [Rattus norvegicus]                                                                                                                                                 | --- | 0.578  | 0.146 | 0.712 | 0.001 | 0.569  | 0.136 | 0.888  | 0.424 |
| 1391680_at   | BF410646 | Transcribed locus, strongly similar to XP_215614.3 PREDICTED: similar to G patch domain containing 4 [Rattus norvegicus]                                                                                                                                           | --- | 0.999  | 0.994 | 1.026 | 0.484 | 0.739  | 0.298 | 1.073  | 0.706 |
| 1391250_at   | BG374216 | Transcribed locus, strongly similar to XP_215812.3 PREDICTED: similar to 53BP1 protein [Rattus norvegicus]                                                                                                                                                         | --- | 0.961  | 0.338 | 0.998 | 0.999 | 0.947  | 0.330 | 1.003  | 0.971 |
| 1383769_at   | BF398206 | Transcribed locus, strongly similar to XP_217409.3 PREDICTED: bone morphogenic protein receptor, type II (serine/threonine kinase) [Rattus norvegicus]                                                                                                             | --- | 1.032  | 0.921 | 1.285 | 0.002 | 0.908  | 0.475 | 1.114  | 0.294 |
| 1390480_at   | AI704806 | Transcribed locus, strongly similar to XP_217893.3 PREDICTED: similar to KIF13A [Rattus norvegicus]                                                                                                                                                                | --- | 0.971  | 0.849 | 0.766 | 0.027 | 0.967  | 0.807 | 0.812  | 0.037 |
| 1396191_at   | BF395978 | Transcribed locus, strongly similar to XP_218162.3 PREDICTED: similar to Eukaryotic translation initiation factor 5B (eIF-5B) (Translation initiation factor IF-2) [Rattus norvegicus]                                                                             | --- | 0.763  | 0.060 | 0.846 | 0.394 | 0.892  | 0.057 | 1.256  | 0.160 |
| 1383910_at   | BF398220 | Transcribed locus, strongly similar to XP_218459.3 PREDICTED: similar to zinc finger protein 574 [Rattus norvegicus]                                                                                                                                               | --- | 1.714  | 0.002 | 1.160 | 0.239 | 1.411  | 0.018 | 1.062  | 0.215 |
| 1390589_at   | AI030995 | Transcribed locus, strongly similar to XP_220062.3 PREDICTED: similar to proliferation associated SNF2-like protein [Rattus norvegicus]                                                                                                                            | --- | 1.045  | 0.902 | 0.760 | 0.050 | 0.939  | 0.525 | 0.750  | 0.132 |
| 1391187_at   | BI303019 | Transcribed locus, strongly similar to XP_220174.3 PREDICTED: similar to periplakin [Rattus norvegicus]                                                                                                                                                            | --- | 0.938  | 0.982 | 0.898 | 0.677 | 0.567  | 0.311 | 0.792  | 0.579 |
| 1385439_x_at | BF417541 | Transcribed locus, strongly similar to XP_220978.3 PREDICTED: similar to Probable ATP-dependent helicase LGP2 (Protein D11Lgp2) [Rattus norvegicus]                                                                                                                | --- | 15.519 | 0.000 | 4.114 | 0.002 | 61.098 | 0.000 | 11.821 | 0.001 |
| 1383948_at   | AA998083 | Transcribed locus, strongly similar to XP_222260.3 PREDICTED: similar to OTTHUMP00000028696 [Rattus norvegicus]                                                                                                                                                    | --- | 0.260  | 0.000 | 0.101 | 0.000 | 0.244  | 0.006 | 0.096  | 0.013 |
| 1376610_a_at | BE109163 | Transcribed locus, strongly similar to XP_222260.3 PREDICTED: similar to OTTHUMP00000028696 [Rattus norvegicus]                                                                                                                                                    | --- | 0.354  | 0.046 | 0.181 | 0.014 | 0.548  | 0.116 | 0.355  | 0.014 |
| 1386309_at   | AI176361 | Transcribed locus, strongly similar to XP_222260.3 PREDICTED: similar to OTTHUMP00000028696 [Rattus norvegicus]                                                                                                                                                    | --- | 0.640  | 0.048 | 0.332 | 0.004 | 0.642  | 0.006 | 0.366  | 0.014 |
| 1386805_at   | BF554446 | Transcribed locus, strongly similar to XP_222260.3 PREDICTED: similar to OTTHUMP00000028696 [Rattus norvegicus]                                                                                                                                                    | --- | 0.653  | 0.280 | 0.100 | 0.002 | 0.646  | 0.272 | 0.100  | 0.002 |
| 1390194_at   | BI296401 | Transcribed locus, strongly similar to XP_223687.3 PREDICTED: similar to RIKEN cDNA 4933435A13 [Rattus norvegicus]                                                                                                                                                 | --- | 1.100  | 0.243 | 0.857 | 0.180 | 1.878  | 0.030 | 1.109  | 0.466 |
| 1383561_at   | BF550555 | Transcribed locus, strongly similar to XP_225045.1 PREDICTED: similar to ligase IV, DNA, ATP-dependent [Rattus norvegicus]                                                                                                                                         | --- | 0.869  | 0.124 | 0.666 | 0.043 | 1.489  | 0.456 | 0.868  | 0.171 |
| 1378676_at   | BF406322 | Transcribed locus, strongly similar to XP_226159.3 PREDICTED: similar to laminin-5 alpha 3 chain [Rattus norvegicus]                                                                                                                                               | --- | 1.002  | 0.742 | 0.821 | 0.046 | 1.713  | 0.074 | 1.002  | 0.999 |
| 1397562_at   | AW534448 | Transcribed locus, strongly similar to XP_226249.3 PREDICTED: similar to amyloid beta precursor protein binding protein 1 [Rattus norvegicus]                                                                                                                      | --- | 0.908  | 0.048 | 1.006 | 0.941 | 0.755  | 0.083 | 1.036  | 0.902 |
| 1378454_at   | BF405939 | Transcribed locus, strongly similar to XP_226608.3 PREDICTED: similar to hypothetical protein FLJ25333 [Rattus norvegicus]                                                                                                                                         | --- | 1.808  | 0.208 | 0.840 | 0.101 | 1.775  | 0.188 | 1.158  | 0.310 |
| 1390886_at   | BE111565 | Transcribed locus, strongly similar to XP_227031.3 PREDICTED: similar to hypothetical protein D3Erttd789e [Rattus norvegicus]                                                                                                                                      | --- | 0.664  | 0.026 | 0.511 | 0.017 | 0.605  | 0.106 | 0.685  | 0.704 |
| 1389632_at   | AA799294 | Transcribed locus, strongly similar to XP_228131.3 PREDICTED: similar to Rho-related BTB domain-containing protein 1 [Rattus norvegicus]                                                                                                                           | --- | 0.479  | 0.011 | 0.224 | 0.000 | 0.446  | 0.001 | 0.305  | 0.013 |
| 1393222_at   | AI058449 | Transcribed locus, strongly similar to XP_230471.1 PREDICTED: similar to Vps18 protein [Rattus norvegicus]                                                                                                                                                         | --- | 1.005  | 0.639 | 1.013 | 0.947 | 0.854  | 0.158 | 0.991  | 0.876 |

|              |          |                                                                                                                                                                                                                                                                                  |     |       |       |       |       |       |       |       |       |
|--------------|----------|----------------------------------------------------------------------------------------------------------------------------------------------------------------------------------------------------------------------------------------------------------------------------------|-----|-------|-------|-------|-------|-------|-------|-------|-------|
| 1396996_at   | BF409811 | Transcribed locus, strongly similar to XP_233217.2 PREDICTED: similar to ubiquitin specific protease 1 [Rattus norvegicus]                                                                                                                                                       | --- | 0.766 | 0.537 | 1.009 | 0.175 | 4.798 | 0.006 | 1.132 | 0.096 |
| 1376824_at   | AI408131 | Transcribed locus, strongly similar to XP_233612.3 PREDICTED: similar to DNA-damage inducible protein 2 [Rattus norvegicus]                                                                                                                                                      | --- | 1.416 | 0.023 | 0.768 | 0.291 | 1.555 | 0.011 | 0.994 | 0.993 |
| 1372987_at   | BF393934 | Transcribed locus, strongly similar to XP_233741.1 PREDICTED: similar to Non-receptor tyrosine-protein kinase TYK2 [Rattus norvegicus]                                                                                                                                           | --- | 2.640 | 0.103 | 1.262 | 0.862 | 2.964 | 0.011 | 1.802 | 0.040 |
| 1377741_at   | BF389042 | Transcribed locus, strongly similar to XP_235292.3 PREDICTED: similar to PHD finger protein 20-like 1 isoform 1 [Rattus norvegicus]                                                                                                                                              | --- | 1.510 | 0.034 | 0.456 | 0.058 | 1.652 | 0.044 | 0.631 | 0.015 |
| 1376169_at   | BE104290 | Transcribed locus, strongly similar to XP_235292.3 PREDICTED: similar to PHD finger protein 20-like 1 isoform 1 [Rattus norvegicus]                                                                                                                                              | --- | 1.353 | 0.089 | 0.461 | 0.000 | 1.696 | 0.005 | 0.606 | 0.009 |
| 1383002_at   | AA998043 | Transcribed locus, strongly similar to XP_235292.3 PREDICTED: similar to PHD finger protein 20-like 1 isoform 1 [Rattus norvegicus]                                                                                                                                              | --- | 1.188 | 0.414 | 0.417 | 0.008 | 1.591 | 0.010 | 0.540 | 0.021 |
| 1371716_at   | BE107610 | Transcribed locus, strongly similar to XP_236644.2 PREDICTED: similar to SWI/SNF related matrix-associated actin-dependent regulator of chromatin subfamily C member 1 (SWI/SNF complex 155 kDa subunit) (BRG1-associated factor 155) (SWI3-related protein) [Rattus norvegicus] | --- | 0.710 | 0.612 | 0.249 | 0.000 | 1.644 | 0.084 | 0.367 | 0.035 |
| 1381539_at   | BI294601 | Transcribed locus, strongly similar to XP_236784.3 PREDICTED: similar to sex-determination protein homolog Fem1a [Rattus norvegicus]                                                                                                                                             | --- | 1.001 | 0.992 | 0.873 | 0.130 | 1.001 | 1.000 | 0.778 | 0.143 |
| 1383310_at   | AI030892 | Transcribed locus, strongly similar to XP_236988.3 PREDICTED: similar to DNA replication licensing factor MCM3 (DNA polymerase alpha holoenzyme-associated protein P1) (P1-MCM3) [Rattus norvegicus]                                                                             | --- | 0.996 | 0.959 | 0.666 | 0.033 | 0.806 | 0.506 | 0.826 | 0.176 |
| 1373459_at   | AI103051 | Transcribed locus, strongly similar to XP_237307.3 PREDICTED: similar to serine/threonine kinase 11 interacting protein [Rattus norvegicus]                                                                                                                                      | --- | 0.798 | 0.397 | 3.477 | 0.004 | 0.828 | 0.721 | 2.019 | 0.017 |
| 1390492_a_at | BM391750 | Transcribed locus, strongly similar to XP_237371.3 PREDICTED: similar to Ubiquitin carboxyl-terminal hydrolase 40 (Ubiquitin thiolesterase 40) (Ubiquitin-specific processing protease 40) (Deubiquitinating enzyme 40) [Rattus norvegicus]                                      | --- | 0.933 | 0.659 | 0.626 | 0.035 | 0.851 | 0.478 | 0.638 | 0.034 |
| 1383841_at   | BF396378 | Transcribed locus, strongly similar to XP_282969.4 PREDICTED: hypothetical protein LOC70802 isoform 1 [Mus musculus]                                                                                                                                                             | --- | 1.027 | 0.780 | 0.771 | 0.248 | 1.737 | 0.047 | 1.106 | 0.609 |
| 1379292_at   | AI412288 | Transcribed locus, strongly similar to XP_341302.2 PREDICTED: similar to mKIAA1344 protein [Rattus norvegicus]                                                                                                                                                                   | --- | 0.727 | 0.127 | 0.912 | 0.527 | 0.907 | 0.610 | 1.134 | 0.254 |
| 1399167_a_at | BI278183 | Transcribed locus, strongly similar to XP_341668.2 PREDICTED: similar to Growth factor receptor bound protein 2-associated protein 1 [Rattus norvegicus]                                                                                                                         | --- | 3.285 | 0.019 | 1.000 | 0.563 | 3.586 | 0.016 | 1.637 | 0.054 |
| 1376219_at   | BI273855 | Transcribed locus, strongly similar to XP_342285.2 PREDICTED: similar to ATPase, Class I, type 8B, member 2 isoform a; phospholipid-transporting ATPase ID [Rattus norvegicus]                                                                                                   | --- | 1.273 | 0.159 | 1.115 | 0.545 | 1.207 | 0.135 | 0.698 | 0.048 |
| 1390250_x_at | BI273855 | Transcribed locus, strongly similar to XP_342285.2 PREDICTED: similar to ATPase, Class I, type 8B, member 2 isoform a; phospholipid-transporting ATPase ID [Rattus norvegicus]                                                                                                   | --- | 0.798 | 0.294 | 1.269 | 0.094 | 0.998 | 0.983 | 0.890 | 0.371 |
| 1376218_a_at | BI273855 | Transcribed locus, strongly similar to XP_342285.2 PREDICTED: similar to ATPase, Class I, type 8B, member 2 isoform a; phospholipid-transporting ATPase ID [Rattus norvegicus]                                                                                                   | --- | 0.812 | 0.320 | 1.272 | 0.845 | 0.946 | 0.697 | 0.932 | 1.000 |
| 1391065_at   | BG373309 | Transcribed locus, strongly similar to XP_343352.2 PREDICTED: similar to KIAA1731 protein [Rattus norvegicus]                                                                                                                                                                    | --- | 0.914 | 0.723 | 0.988 | 0.054 | 1.365 | 0.881 | 1.213 | 0.077 |
| 1373199_at   | AA943573 | Transcribed locus, strongly similar to XP_343818.1 PREDICTED: similar to Alpha-galactosidase A precursor (Melibiase) (Alpha-D-galactoside galactohydrolase) (Alpha-D-galactosidase A) [Rattus norvegicus]                                                                        | --- | 0.638 | 0.698 | 0.574 | 0.012 | 0.904 | 0.900 | 0.614 | 0.022 |
| 1373880_at   | AI408513 | Transcribed locus, strongly similar to XP_344704.2 PREDICTED: similar to mKIAA1632 protein [Rattus norvegicus]                                                                                                                                                                   | --- | 1.201 | 0.091 | 1.888 | 0.004 | 1.048 | 0.820 | 1.396 | 0.019 |
| 1382961_at   | AI013305 | Transcribed locus, strongly similar to XP_346951.1 PREDICTED: hypothetical protein XP_346950 [Rattus norvegicus]                                                                                                                                                                 | --- | 0.988 | 0.971 | 1.407 | 0.904 | 1.084 | 0.740 | 1.332 | 0.282 |
| 1393194_at   | BF558732 | Transcribed locus, strongly similar to XP_347167.1 PREDICTED: similar to Williams-Beuren syndrome deletion transcript 9 homolog [Rattus norvegicus]                                                                                                                              | --- | 1.089 | 0.232 | 1.352 | 0.151 | 1.047 | 0.485 | 1.004 | 0.569 |
| 1382001_at   | AI227612 | Transcribed locus, strongly similar to XP_418542.1 PREDICTED: similar to Myeloid/lymphoid or mixed-lineage leukemia protein 3 homolog (Histone-lysine N-methyltransferase, H3 lysine-4 specific MLL3) (Homologous to ALR protein) [Gallus gallus]                                | --- | 1.136 | 0.406 | 0.807 | 0.004 | 0.882 | 0.599 | 0.937 | 0.380 |
| 1379423_at   | AA963364 | Transcribed locus, strongly similar to XP_418627.1 PREDICTED: similar to Ras suppressor protein 1 (Rsu-1) (RSP-1) [Gallus gallus]                                                                                                                                                | --- | 1.183 | 0.181 | 1.047 | 0.253 | 1.170 | 0.429 | 0.867 | 0.119 |
| 1389466_at   | BG374280 | Transcribed locus, strongly similar to XP_421547.1 PREDICTED: similar to coiled-coil domain containing 6 [Gallus gallus]                                                                                                                                                         | --- | 0.470 | 0.053 | 0.893 | 0.660 | 0.562 | 0.012 | 0.712 | 0.063 |
| 1371776_at   | AA819268 | Transcribed locus, strongly similar to XP_424759.1 PREDICTED: similar to 3-phosphatidylinositol kinase (EC 2.7.1.-) 85K chain alpha - bovine [Gallus gallus]                                                                                                                     | --- | 1.353 | 0.534 | 1.410 | 0.155 | 1.638 | 0.901 | 0.914 | 0.508 |
| 1394463_at   | BE097727 | Transcribed locus, strongly similar to XP_507983.1 PREDICTED: similar to PRO1933 [Pan troglodytes]                                                                                                                                                                               | --- | 1.033 | 0.852 | 0.927 | 0.145 | 1.659 | 0.049 | 0.929 | 0.219 |
| 1398945_at   | AA851439 | Transcribed locus, strongly similar to XP_508798.1 PREDICTED: similar to probable RNA helicase (EC 3.6.1.-) RCK - human [Pan troglodytes]                                                                                                                                        | --- | 0.726 | 0.060 | 0.475 | 0.001 | 0.641 | 0.123 | 0.516 | 0.000 |
| 1391031_at   | BF389889 | Transcribed locus, strongly similar to XP_510753.1 PREDICTED: similar to Transcription elongation factor B polypeptide 2 (RNA polymerase II transcription factor SIII subunit B) (SIII p18) (Elongin B) (EloB) (Elongin 18 kDa subunit) [Pan troglodytes]                        | --- | 2.330 | 0.002 | 1.538 | 0.126 | 1.359 | 0.037 | 1.490 | 0.062 |

|              |          |                                                                                                                                                                                        |     |       |       |       |       |        |       |       |       |
|--------------|----------|----------------------------------------------------------------------------------------------------------------------------------------------------------------------------------------|-----|-------|-------|-------|-------|--------|-------|-------|-------|
| 1396638_at   | BM382854 | Transcribed locus, strongly similar to XP_510927.1 PREDICTED: similar to septin 1 [Pan troglodytes]                                                                                    | --- | 1.045 | 0.946 | 1.362 | 0.976 | 1.246  | 0.208 | 1.086 | 0.889 |
| 1380921_at   | AI548341 | Transcribed locus, strongly similar to XP_512522.1 PREDICTED: similar to MEF2B protein [Pan troglodytes]                                                                               | --- | 1.001 | 0.902 | 0.858 | 0.247 | 1.027  | 0.616 | 0.998 | 0.990 |
| 1382110_at   | AA899630 | Transcribed locus, strongly similar to XP_518480.1 PREDICTED: similar to trinucleotide repeat containing 5; expanded repeat domain, CAG/CTG 5; CAG repeat containing [Pan troglodytes] | --- | 0.596 | 0.084 | 1.324 | 0.264 | 0.575  | 0.076 | 1.374 | 0.598 |
| 1379173_at   | BF394515 | Transcribed locus, strongly similar to XP_518598.1 PREDICTED: similar to pleckstrin homology domain interacting protein [Pan troglodytes]                                              | --- | 0.852 | 0.796 | 1.224 | 0.013 | 0.689  | 0.172 | 1.002 | 0.971 |
| 1382142_at   | AI029975 | Transcribed locus, strongly similar to XP_520163.1 PREDICTED: similar to ATP-binding cassette transporter 1 [Pan troglodytes]                                                          | --- | 1.014 | 0.091 | 0.413 | 0.006 | 0.954  | 0.616 | 0.398 | 0.012 |
| 1382431_at   | AI103530 | Transcribed locus, strongly similar to XP_520163.1 PREDICTED: similar to ATP-binding cassette transporter 1 [Pan troglodytes]                                                          | --- | 1.076 | 0.297 | 0.445 | 0.002 | 0.809  | 0.236 | 0.442 | 0.002 |
| 1383204_at   | BE099804 | Transcribed locus, strongly similar to XP_523419.1 PREDICTED: similar to zinc and ring finger protein 1; nerve injury gene 283 [Pan troglodytes]                                       | --- | 4.598 | 0.004 | 3.677 | 0.001 | 6.751  | 0.001 | 2.748 | 0.001 |
| 1392975_at   | AI058938 | Transcribed locus, strongly similar to XP_525786.1 PREDICTED: similar to chromosome 2 open reading frame 7 [Pan troglodytes]                                                           | --- | 0.472 | 0.020 | 0.763 | 0.110 | 0.473  | 0.014 | 0.750 | 0.223 |
| 1393841_at   | AA859317 | Transcribed locus, strongly similar to XP_528581.1 PREDICTED: similar to hypothetical protein FLJ31810 [Pan troglodytes]                                                               | --- | 0.190 | 0.000 | 0.124 | 0.004 | 0.279  | 0.005 | 0.309 | 0.094 |
| 1376324_at   | BF406329 | Transcribed locus, strongly similar to XP_528965.1 PREDICTED: similar to dJ54B20.4 (novel KRAB box containing C2H2 type zinc finger protein) [Pan troglodytes]                         | --- | 0.920 | 0.802 | 1.044 | 0.508 | 1.582  | 0.059 | 0.796 | 0.213 |
| 1379400_at   | AI044556 | Transcribed locus, strongly similar to XP_531763.2 PREDICTED: similar to aldehyde dehydrogenase 1 family, member L2 [Canis familiaris]                                                 | --- | 0.207 | 0.002 | 0.252 | 0.016 | 0.273  | 0.004 | 0.267 | 0.025 |
| 1389558_at   | BF281962 | Transcribed locus, strongly similar to XP_532522.2 PREDICTED: similar to CG3570-PA [Canis familiaris]                                                                                  | --- | 1.481 | 0.054 | 1.248 | 0.056 | 2.229  | 0.002 | 1.345 | 0.013 |
| 1385149_at   | AI502063 | Transcribed locus, strongly similar to XP_532627.2 PREDICTED: similar to methyltransferase like 3 isoform 1 [Canis familiaris]                                                         | --- | 0.844 | 0.144 | 0.878 | 0.409 | 1.010  | 0.281 | 1.070 | 0.566 |
| 1396247_at   | AI453997 | Transcribed locus, strongly similar to XP_537630.2 PREDICTED: similar to CG10802-PA [Canis familiaris]                                                                                 | --- | 0.974 | 0.160 | 1.491 | 0.446 | 1.369  | 0.097 | 1.329 | 0.918 |
| 1390915_at   | BI275327 | Transcribed locus, strongly similar to XP_538131.2 PREDICTED: similar to MORC family CW-type zinc finger 4 (Zinc finger CW-type coiled-coil domain protein 2) [Canis familiaris]       | --- | 0.969 | 0.292 | 1.000 | 0.775 | 1.068  | 0.659 | 0.949 | 0.532 |
| 1378229_at   | BE118073 | Transcribed locus, strongly similar to XP_541626.2 PREDICTED: similar to leucine rich repeat and fibronectin type III domain containing 1 [Canis familiaris]                           | --- | 1.373 | 0.363 | 0.993 | 0.897 | 1.500  | 0.090 | 0.997 | 0.930 |
| 1397174_at   | AW520453 | Transcribed locus, strongly similar to XP_547003.2 PREDICTED: similar to Forkhead box protein K1 (Myocyte nuclear factor) (MNF) [Canis familiaris]                                     | --- | 1.767 | 0.057 | 0.843 | 0.360 | 1.381  | 0.124 | 0.844 | 0.001 |
| 1386744_x_at | BF544149 | Transcribed locus, strongly similar to XP_574268.1 PREDICTED: similar to LRRGT00194 [Rattus norvegicus]                                                                                | --- | 1.191 | 0.837 | 0.804 | 0.154 | 0.983  | 0.924 | 0.772 | 0.281 |
| 1373872_at   | BE096535 | Transcribed locus, strongly similar to XP_574462.1 PREDICTED: similar to hypothetical protein C230069C04 [Rattus norvegicus]                                                           | --- | 0.991 | 0.999 | 0.663 | 0.852 | 0.999  | 0.991 | 0.995 | 0.962 |
| 1373703_at   | BE113247 | Transcribed locus, strongly similar to XP_576199.1 PREDICTED: similar to envelope [Rattus norvegicus]                                                                                  | --- | 2.326 | 0.220 | 1.071 | 0.075 | 10.954 | 0.002 | 3.250 | 0.053 |
| 1381459_at   | BE099644 | Transcribed locus, strongly similar to XP_576213.1 PREDICTED: similar to RIKEN cDNA 4933417K05 gene [Rattus norvegicus]                                                                | --- | 0.313 | 0.002 | 0.841 | 0.385 | 0.428  | 0.008 | 1.188 | 0.260 |
| 1398922_at   | BM389018 | Transcribed locus, strongly similar to XP_576460.1 PREDICTED: similar to hypothetical protein PB402898.00.0 [Rattus norvegicus]                                                        | --- | 0.702 | 0.071 | 0.856 | 0.069 | 0.704  | 0.045 | 1.035 | 0.198 |
| 1373942_at   | BF396312 | Transcribed locus, strongly similar to XP_576460.1 PREDICTED: similar to hypothetical protein PB402898.00.0 [Rattus norvegicus]                                                        | --- | 0.838 | 0.384 | 0.628 | 0.054 | 1.321  | 0.624 | 1.116 | 0.745 |
| 1385653_at   | AA817920 | Transcribed locus, strongly similar to XP_576460.1 PREDICTED: similar to hypothetical protein PB402898.00.0 [Rattus norvegicus]                                                        | --- | 1.160 | 0.482 | 0.950 | 0.955 | 1.525  | 0.285 | 0.973 | 0.543 |
| 1395427_at   | AW918981 | Transcribed locus, strongly similar to XP_576460.1 PREDICTED: similar to hypothetical protein PB402898.00.0 [Rattus norvegicus]                                                        | --- | 0.997 | 0.986 | 0.989 | 0.353 | 0.930  | 0.193 | 1.076 | 0.269 |
| 1390678_at   | AA955527 | Transcribed locus, strongly similar to XP_578163.1 PREDICTED: similar to hypothetical protein, expressed [Rattus norvegicus]                                                           | --- | 1.579 | 0.036 | 1.552 | 0.183 | 1.104  | 0.411 | 0.935 | 0.643 |
| 1372022_at   | BI283822 | Transcribed locus, strongly similar to XP_579363.1 PREDICTED: hypothetical protein XP_579363 [Rattus norvegicus]                                                                       | --- | 0.586 | 0.623 | 0.930 | 0.071 | 0.590  | 0.486 | 0.921 | 0.059 |
| 1371735_at   | AI105202 | Transcribed locus, strongly similar to XP_579758.1 PREDICTED: hypothetical protein XP_579758 [Rattus norvegicus]                                                                       | --- | 1.262 | 0.298 | 2.978 | 0.004 | 0.910  | 0.147 | 2.819 | 0.005 |
| 1383921_at   | AW916957 | Transcribed locus, strongly similar to XP_579758.1 PREDICTED: hypothetical protein XP_579758 [Rattus norvegicus]                                                                       | --- | 1.044 | 0.512 | 1.140 | 0.787 | 0.868  | 0.052 | 1.394 | 0.707 |
| 1379801_at   | AI137954 | Transcribed locus, strongly similar to XP_580017.1 PREDICTED: hypothetical protein XP_580017 [Rattus norvegicus]                                                                       | --- | 0.954 | 0.100 | 0.461 | 0.091 | 1.456  | 0.682 | 0.755 | 0.476 |
| 1379445_at   | BF283378 | Transcribed locus, strongly similar to XP_580091.1 PREDICTED: hypothetical protein XP_580091 [Rattus norvegicus]                                                                       | --- | 0.838 | 0.660 | 0.183 | 0.002 | 0.930  | 0.148 | 0.309 | 0.037 |
| 1378530_at   | BF394061 | Transcribed locus, strongly similar to XP_580104.1 PREDICTED: hypothetical protein XP_580104 [Rattus norvegicus]                                                                       | --- | 0.659 | 0.053 | 0.995 | 0.927 | 0.596  | 0.063 | 1.000 | 0.795 |
| 1383185_at   | BE105131 | Transcribed locus, strongly similar to XP_580113.1 PREDICTED: hypothetical protein XP_580113 [Rattus norvegicus]                                                                       | --- | 0.918 | 0.716 | 0.315 | 0.003 | 1.314  | 0.132 | 0.282 | 0.074 |
| 1383247_a_at | BI291029 | Transcribed locus, strongly similar to XP_848415.1 PREDICTED: similar to spinster-like [Canis familiaris]                                                                              | --- | 0.671 | 0.006 | 0.947 | 0.405 | 0.617  | 0.063 | 1.061 | 0.198 |



|              |          |                                                                                                                                                                                                             |     |       |       |       |       |       |       |       |       |
|--------------|----------|-------------------------------------------------------------------------------------------------------------------------------------------------------------------------------------------------------------|-----|-------|-------|-------|-------|-------|-------|-------|-------|
| 1375939_at   | BM391922 | Transcribed locus, strongly similar to XP_852159.1 PREDICTED: similar to GC-rich sequence DNA-binding factor homolog [Canis familiaris]                                                                     | --- | 1.105 | 0.598 | 0.915 | 0.496 | 1.217 | 0.552 | 1.000 | 0.998 |
| 1375268_at   | AA858591 | Transcribed locus, strongly similar to XP_853191.1 PREDICTED: similar to 40S ribosomal protein S27-like protein [Canis familiaris]                                                                          | --- | 0.959 | 0.898 | 2.295 | 0.008 | 0.790 | 0.582 | 2.631 | 0.001 |
| 1388454_at   | AI230759 | Transcribed locus, strongly similar to XP_853377.1 PREDICTED: similar to ornithine decarboxylase antizyme 2 [Canis familiaris]                                                                              | --- | 0.917 | 0.892 | 0.438 | 0.005 | 1.197 | 0.040 | 0.569 | 0.012 |
| 1374562_at   | AI177115 | Transcribed locus, strongly similar to XP_860264.1 PREDICTED: similar to CG4699-PA, isoform A isoform 5 [Canis familiaris]                                                                                  | --- | 1.436 | 0.035 | 1.049 | 0.876 | 1.290 | 0.005 | 0.940 | 0.179 |
| 1378416_at   | AA892565 | Transcribed locus, strongly similar to XP_868417.1 PREDICTED: similar to tetratricopeptide repeat domain 8 isoform B isoform 2 [Canis familiaris]                                                           | --- | 0.476 | 0.004 | 0.265 | 0.001 | 0.314 | 0.018 | 0.272 | 0.027 |
| 1382140_at   | AI012247 | Transcribed locus, weakly similar to NP_001003141.1 protein tyrosine kinase fer [Canis familiaris]                                                                                                          | --- | 1.379 | 0.338 | 0.766 | 0.144 | 1.857 | 0.984 | 0.751 | 0.038 |
| 1376464_at   | BE102505 | Transcribed locus, weakly similar to NP_001007662.1 thymocyte protein thy28 [Rattus norvegicus]                                                                                                             | --- | 0.454 | 0.025 | 0.325 | 0.001 | 0.562 | 0.084 | 0.351 | 0.003 |
| 1394416_at   | AI176741 | Transcribed locus, weakly similar to NP_006141.2 LIM domain only 6 [Homo sapiens]                                                                                                                           | --- | 0.645 | 0.340 | 0.302 | 0.028 | 0.385 | 0.233 | 0.283 | 0.053 |
| 1374178_at   | AI103954 | Transcribed locus, weakly similar to NP_032303.1 4-hydroxyphenylpyruvic acid dioxygenase [Mus musculus]                                                                                                     | --- | 1.122 | 0.538 | 1.332 | 0.061 | 1.336 | 0.065 | 1.643 | 0.004 |
| 1389414_at   | BI285335 | Transcribed locus, weakly similar to NP_032607.1 melanoma antigen [Mus musculus]                                                                                                                            | --- | 0.309 | 0.029 | 1.046 | 0.691 | 0.708 | 0.321 | 0.780 | 0.022 |
| 1383901_at   | BI287446 | Transcribed locus, weakly similar to NP_035020.2 neural precursor cell expressed, developmentally down-regulated gene 4 [Mus musculus]                                                                      | --- | 1.452 | 0.128 | 1.796 | 0.015 | 2.824 | 0.007 | 1.876 | 0.009 |
| 1380232_at   | BE119516 | Transcribed locus, weakly similar to NP_035020.2 neural precursor cell expressed, developmentally down-regulated gene 4 [Mus musculus]                                                                      | --- | 0.935 | 0.714 | 0.583 | 0.068 | 1.585 | 0.016 | 0.788 | 0.058 |
| 1380233_x_at | BE119516 | Transcribed locus, weakly similar to NP_035020.2 neural precursor cell expressed, developmentally down-regulated gene 4 [Mus musculus]                                                                      | --- | 0.916 | 0.728 | 0.616 | 0.037 | 1.467 | 0.594 | 0.683 | 0.023 |
| 1374800_at   | BI303627 | Transcribed locus, weakly similar to NP_035385.1 retinol binding protein 4, plasma [Mus musculus]                                                                                                           | --- | 0.535 | 0.409 | 0.354 | 0.001 | 0.856 | 0.433 | 0.515 | 0.001 |
| 1381124_at   | AA819672 | Transcribed locus, weakly similar to NP_035385.1 retinol binding protein 4, plasma [Mus musculus]                                                                                                           | --- | 1.059 | 0.962 | 0.742 | 0.155 | 1.058 | 0.950 | 0.761 | 0.076 |
| 1393160_at   | AA955879 | Transcribed locus, weakly similar to NP_035665.2 T-box 3 protein isoform 1 [Mus musculus]                                                                                                                   | --- | 1.222 | 0.948 | 0.991 | 0.981 | 0.826 | 0.429 | 1.241 | 0.561 |
| 1388935_at   | AI231814 | Transcribed locus, weakly similar to NP_036019.1 septin 3 [Mus musculus]                                                                                                                                    | --- | 1.112 | 0.235 | 1.093 | 0.690 | 1.022 | 0.896 | 0.998 | 0.984 |
| 1372368_at   | AI230431 | Transcribed locus, weakly similar to NP_036925.1 guanidinoacetate methyltransferase [Rattus norvegicus]                                                                                                     | --- | 0.709 | 0.192 | 0.989 | 0.555 | 0.797 | 0.075 | 0.959 | 0.526 |
| 1376109_at   | BM387711 | Transcribed locus, weakly similar to NP_062289.1 DNA binding protein with his-thr domain [Mus musculus]                                                                                                     | --- | 1.423 | 0.051 | 0.995 | 0.941 | 2.004 | 0.068 | 1.486 | 0.207 |
| 1389530_at   | BI274313 | Transcribed locus, weakly similar to NP_071556.1 L-gulonolactone oxidase [Rattus norvegicus]                                                                                                                | --- | 0.755 | 0.612 | 1.781 | 0.001 | 0.802 | 0.025 | 1.643 | 0.012 |
| 1390823_at   | AA924839 | Transcribed locus, weakly similar to NP_116026.1 S-phase kinase-associated protein 2 isoform 2 [Homo sapiens]                                                                                               | --- | 0.665 | 0.093 | 0.964 | 0.920 | 0.800 | 0.095 | 0.994 | 0.966 |
| 1396349_at   | BE099657 | Transcribed locus, weakly similar to NP_190697.1 unknown protein [Arabidopsis thaliana]                                                                                                                     | --- | 1.020 | 0.142 | 0.456 | 0.006 | 1.846 | 0.027 | 0.756 | 0.097 |
| 1383058_at   | AI410438 | Transcribed locus, weakly similar to NP_198672.1 ATP binding / kinase/ protein kinase/ protein serine/threonine kinase/ protein-tyrosine kinase/ structural constituent of cell wall [Arabidopsis thaliana] | --- | 1.134 | 0.294 | 0.973 | 0.255 | 0.978 | 0.827 | 1.090 | 0.693 |
| 1383332_at   | BI281615 | Transcribed locus, weakly similar to NP_473118.2 hypothetical protein [Plasmodium falciparum 3D7]                                                                                                           | --- | 1.252 | 0.024 | 0.966 | 0.700 | 1.211 | 0.031 | 0.933 | 0.476 |
| 1388933_at   | AI233748 | Transcribed locus, weakly similar to NP_473118.2 hypothetical protein [Plasmodium falciparum 3D7]                                                                                                           | --- | 0.453 | 0.280 | 3.245 | 0.003 | 0.336 | 0.036 | 2.514 | 0.001 |
| 1393003_at   | AA899900 | Transcribed locus, weakly similar to NP_473118.2 hypothetical protein [Plasmodium falciparum 3D7]                                                                                                           | --- | 0.798 | 0.465 | 0.215 | 0.002 | 1.301 | 0.017 | 0.128 | 0.018 |
| 1379545_at   | BG372752 | Transcribed locus, weakly similar to NP_473118.2 hypothetical protein [Plasmodium falciparum 3D7]                                                                                                           | --- | 0.814 | 0.489 | 0.310 | 0.012 | 0.661 | 0.434 | 0.328 | 0.037 |
| 1392868_at   | AA859495 | Transcribed locus, weakly similar to NP_473357.1 FUS interacting protein (serine-arginine rich) 1 isoform 2 [Homo sapiens]                                                                                  | --- | 1.199 | 0.147 | 1.514 | 0.056 | 2.268 | 0.207 | 1.880 | 0.001 |
| 1373501_at   | AA955361 | Transcribed locus, weakly similar to NP_542945.1 proteasome (prosome, macropain) subunit, beta type 8 [Rattus norvegicus]                                                                                   | --- | 1.025 | 0.954 | 0.922 | 0.065 | 1.633 | 0.002 | 1.184 | 0.248 |
| 1380406_at   | BE115630 | Transcribed locus, weakly similar to NP_570953.1 CAMP [Mus musculus]                                                                                                                                        | --- | 0.601 | 0.049 | 0.590 | 0.520 | 0.947 | 0.731 | 0.677 | 0.072 |
| 1399031_at   | BM391360 | Transcribed locus, weakly similar to NP_594758.1 hypothetical protein SPAC4F10.15c [Schizosaccharomyces pombe 972h-]                                                                                        | --- | 0.784 | 0.256 | 0.695 | 0.658 | 0.847 | 0.143 | 0.998 | 0.993 |
| 1382005_at   | BI280285 | Transcribed locus, weakly similar to NP_598738.1 transferrin [Mus musculus]                                                                                                                                 | --- | 1.205 | 0.314 | 0.876 | 0.077 | 1.448 | 0.006 | 1.089 | 0.020 |
| 1390905_at   | AW533482 | Transcribed locus, weakly similar to NP_608540.1 CG2839-PA [Drosophila melanogaster]                                                                                                                        | --- | 1.737 | 0.003 | 1.087 | 0.379 | 1.283 | 0.182 | 1.011 | 0.608 |
| 1377794_at   | BF288862 | Transcribed locus, weakly similar to NP_659075.1 RIKEN cDNA 4732497003 [Mus musculus]                                                                                                                       | --- | 0.609 | 0.148 | 0.900 | 0.205 | 0.569 | 0.011 | 0.867 | 0.604 |
| 1379471_at   | BI275767 | Transcribed locus, weakly similar to NP_671483.1 hippyragranin [Rattus norvegicus]                                                                                                                          | --- | 0.842 | 0.133 | 0.545 | 0.003 | 0.775 | 0.140 | 0.695 | 0.033 |
| 1394154_at   | AI008375 | Transcribed locus, weakly similar to NP_671483.1 hippyragranin [Rattus norvegicus]                                                                                                                          | --- | 1.020 | 0.245 | 0.914 | 0.717 | 1.022 | 0.811 | 0.974 | 0.672 |
| 1377633_a_at | AW918411 | Transcribed locus, weakly similar to NP_671483.1 hippyragranin [Rattus norvegicus]                                                                                                                          | --- | 0.970 | 0.887 | 0.726 | 0.997 | 1.710 | 0.025 | 0.910 | 0.543 |
| 1396984_at   | BM390248 | Transcribed locus, weakly similar to NP_703313.1 hypothetical protein [Plasmodium falciparum 3D7]                                                                                                           | --- | 1.426 | 0.045 | 0.649 | 0.027 | 1.675 | 0.090 | 0.641 | 0.018 |
| 1372471_at   | BI283728 | Transcribed locus, weakly similar to NP_703313.1 hypothetical protein [Plasmodium falciparum 3D7]                                                                                                           | --- | 0.989 | 0.973 | 1.231 | 0.102 | 0.959 | 0.813 | 0.977 | 0.764 |
| 1384702_at   | AI231062 | Transcribed locus, weakly similar to NP_704188.1 hypothetical protein [Plasmodium falciparum 3D7]                                                                                                           | --- | 1.509 | 0.199 | 0.742 | 0.110 | 1.614 | 0.202 | 0.901 | 0.021 |
| 1378494_at   | BF394109 | Transcribed locus, weakly similar to NP_731093.2 CG31483-PA [Drosophila melanogaster]                                                                                                                       | --- | 1.001 | 0.996 | 1.023 | 0.754 | 1.012 | 0.672 | 1.004 | 0.993 |
| 1397457_at   | BE106796 | Transcribed locus, weakly similar to NP_778159.1 hypothetical protein LOC211039 [Mus musculus]                                                                                                              | --- | 1.231 | 0.784 | 1.020 | 0.230 | 1.783 | 0.108 | 1.205 | 0.159 |
| 1384414_at   | AI044483 | Transcribed locus, weakly similar to NP_778159.1 hypothetical protein LOC211039 [Mus musculus]                                                                                                              | --- | 0.996 | 0.993 | 0.867 | 0.473 | 1.115 | 0.674 | 0.969 | 0.473 |
| 1378786_at   | AI228437 | Transcribed locus, weakly similar to NP_780607.2 hypothetical protein LOC109050 [Mus musculus]                                                                                                              | --- | 1.011 | 0.876 | 0.719 | 0.029 | 1.335 | 0.091 | 1.505 | 0.855 |
| 1385749_at   | BF392886 | Transcribed locus, weakly similar to NP_795944.1 hypothetical protein LOC319641 [Mus musculus]                                                                                                              | --- | 1.234 | 0.171 | 0.312 | 0.001 | 1.891 | 0.005 | 0.582 | 0.026 |
| 1390675_at   | BE119856 | Transcribed locus, weakly similar to NP_796192.1 hypothetical protein LOC320650 [Mus musculus]                                                                                                              | --- | 1.015 | 0.908 | 1.003 | 0.984 | 1.125 | 0.153 | 1.201 | 0.875 |
| 1373316_at   | BF409329 | Transcribed locus, weakly similar to NP_851783.1 zinc finger protein 120 isoform 1 [Mus musculus]                                                                                                           | --- | 0.679 | 0.198 | 0.938 | 0.862 | 1.137 | 0.465 | 1.063 | 0.806 |
| 1379731_at   | BG666613 | Transcribed locus, weakly similar to NP_862906.1 CD59b antigen [Mus musculus]                                                                                                                               | --- | 1.125 | 0.534 | 0.879 | 0.200 | 1.473 | 0.052 | 0.784 | 0.027 |
| 1373676_at   | AI712626 | Transcribed locus, weakly similar to NP_937890.1 SERTA domain containing 4 [Mus musculus]                                                                                                                   | --- | 0.504 | 0.042 | 0.477 | 0.024 | 0.442 | 0.053 | 0.404 | 0.013 |

|              |          |                                                                                                                                            |     |       |       |       |       |       |       |       |       |
|--------------|----------|--------------------------------------------------------------------------------------------------------------------------------------------|-----|-------|-------|-------|-------|-------|-------|-------|-------|
| 1383036_at   | AI137547 | Transcribed locus, weakly similar to XP_125510.6 PREDICTED: hypothetical protein LOC73112 [Mus musculus]                                   | --- | 1.541 | 0.067 | 1.202 | 0.224 | 2.052 | 0.027 | 1.662 | 0.167 |
| 1392007_at   | AI044568 | Transcribed locus, weakly similar to XP_214508.3 PREDICTED: similar to mKIAA0019 protein [Rattus norvegicus]                               | --- | 0.745 | 0.567 | 1.010 | 0.279 | 0.610 | 0.045 | 1.649 | 0.073 |
| 1398600_at   | AW524565 | Transcribed locus, weakly similar to XP_215059.1 PREDICTED: similar to erythroid differentiation-related factor [Rattus norvegicus]        | --- | 1.022 | 0.694 | 0.617 | 0.012 | 0.827 | 0.164 | 0.460 | 0.099 |
| 1388577_at   | BI274650 | Transcribed locus, weakly similar to XP_215184.3 PREDICTED: similar to inner centromere protein [Rattus norvegicus]                        | --- | 1.139 | 0.631 | 1.693 | 0.142 | 0.747 | 0.361 | 1.252 | 0.978 |
| 1381065_at   | BG379401 | Transcribed locus, weakly similar to XP_218469.3 PREDICTED: similar to zinc finger protein 383 [Rattus norvegicus]                         | --- | 1.146 | 0.584 | 1.119 | 0.634 | 1.305 | 0.882 | 1.146 | 0.171 |
| 1393746_at   | BE117730 | Transcribed locus, weakly similar to XP_219319.3 PREDICTED: similar to deleted in malignant brain tumors 1 [Rattus norvegicus]             | --- | 1.610 | 0.957 | 0.506 | 0.074 | 1.336 | 0.340 | 0.955 | 0.565 |
| 1395980_at   | BF393243 | Transcribed locus, weakly similar to XP_219541.3 PREDICTED: similar to RIKEN cDNA 5730596K20 [Rattus norvegicus]                           | --- | 0.879 | 0.451 | 0.610 | 0.616 | 1.593 | 0.183 | 0.916 | 0.608 |
| 1397579_x_at | BI294552 | Transcribed locus, weakly similar to XP_220408.3 PREDICTED: similar to m-D/Bsp120I 1-1 [Rattus norvegicus]                                 | --- | 0.912 | 0.906 | 0.318 | 0.017 | 1.002 | 0.997 | 0.265 | 0.011 |
| 1384468_at   | BI283314 | Transcribed locus, weakly similar to XP_224414.3 PREDICTED: similar to LRRGT00066 [Rattus norvegicus]                                      | --- | 0.346 | 0.044 | 0.419 | 0.026 | 0.387 | 0.003 | 0.296 | 0.061 |
| 1396991_at   | BF402387 | Transcribed locus, weakly similar to XP_228401.3 PREDICTED: similar to LRRGT00152 [Rattus norvegicus]                                      | --- | 1.143 | 0.798 | 1.070 | 0.306 | 0.940 | 0.560 | 0.982 | 0.139 |
| 1374318_at   | BE328978 | Transcribed locus, weakly similar to XP_229142.3 PREDICTED: similar to Ac1-163 [Rattus norvegicus]                                         | --- | 0.700 | 0.127 | 0.791 | 0.066 | 0.776 | 0.232 | 0.813 | 0.881 |
| 1374037_at   | BI288699 | Transcribed locus, weakly similar to XP_234171.3 PREDICTED: similar to 1110008L16Rik protein [Rattus norvegicus]                           | --- | 0.593 | 0.003 | 0.716 | 0.045 | 0.640 | 0.036 | 0.784 | 0.012 |
| 1383187_a_at | AA944136 | Transcribed locus, weakly similar to XP_234997.2 PREDICTED: similar to RIKEN cDNA E430026E19 [Rattus norvegicus]                           | --- | 1.993 | 0.036 | 1.142 | 0.683 | 1.752 | 0.036 | 0.939 | 0.512 |
| 1386855_at   | AA944136 | Transcribed locus, weakly similar to XP_234997.2 PREDICTED: similar to RIKEN cDNA E430026E19 [Rattus norvegicus]                           | --- | 1.369 | 0.130 | 0.896 | 0.786 | 1.330 | 0.019 | 1.124 | 0.258 |
| 1371878_at   | BI294787 | Transcribed locus, weakly similar to XP_315986.2 ENSANGP00000010844 [Anopheles gambiae str. PEST]                                          | --- | 1.343 | 0.363 | 0.838 | 0.822 | 1.184 | 0.566 | 0.847 | 0.716 |
| 1397738_at   | BF416112 | Transcribed locus, weakly similar to XP_341211.2 PREDICTED: similar to Ac1591 [Rattus norvegicus]                                          | --- | 0.686 | 0.344 | 0.504 | 0.118 | 0.990 | 0.965 | 0.609 | 0.192 |
| 1378811_at   | BF402978 | Transcribed locus, weakly similar to XP_341211.2 PREDICTED: similar to Ac1591 [Rattus norvegicus]                                          | --- | 1.368 | 0.731 | 0.988 | 0.871 | 1.086 | 0.748 | 1.152 | 0.973 |
| 1393371_at   | BG378781 | Transcribed locus, weakly similar to XP_341767.2 PREDICTED: similar to zinc finger protein 52 [Rattus norvegicus]                          | --- | 1.258 | 0.811 | 1.200 | 0.427 | 0.990 | 0.975 | 1.110 | 0.827 |
| 1373919_at   | AA943801 | Transcribed locus, weakly similar to XP_342574.1 PREDICTED: similar to Csr1 [Rattus norvegicus]                                            | --- | 1.016 | 0.271 | 0.502 | 0.012 | 0.882 | 0.332 | 0.513 | 0.010 |
| 1373079_at   | BI296427 | Transcribed locus, weakly similar to XP_342574.1 PREDICTED: similar to Csr1 [Rattus norvegicus]                                            | --- | 0.645 | 0.359 | 0.382 | 0.000 | 0.718 | 0.053 | 0.349 | 0.000 |
| 1385322_at   | AI602154 | Transcribed locus, weakly similar to XP_342574.1 PREDICTED: similar to Csr1 [Rattus norvegicus]                                            | --- | 1.135 | 0.574 | 0.899 | 0.560 | 1.084 | 0.371 | 1.008 | 0.952 |
| 1395277_at   | BF396535 | Transcribed locus, weakly similar to XP_342574.1 PREDICTED: similar to Csr1 [Rattus norvegicus]                                            | --- | 1.151 | 0.610 | 1.072 | 0.761 | 1.662 | 0.110 | 1.045 | 0.337 |
| 1391569_at   | BF406435 | Transcribed locus, weakly similar to XP_342574.1 PREDICTED: similar to Csr1 [Rattus norvegicus]                                            | --- | 0.889 | 0.630 | 0.987 | 0.986 | 1.263 | 0.058 | 0.971 | 0.868 |
| 1396095_at   | BG673600 | Transcribed locus, weakly similar to XP_342574.1 PREDICTED: similar to Csr1 [Rattus norvegicus]                                            | --- | 1.169 | 0.796 | 2.250 | 0.010 | 1.737 | 0.114 | 2.068 | 0.009 |
| 1375593_at   | BF401589 | Transcribed locus, weakly similar to XP_342574.1 PREDICTED: similar to Csr1 [Rattus norvegicus]                                            | --- | 0.983 | 0.960 | 1.007 | 0.792 | 0.900 | 0.519 | 1.056 | 0.734 |
| 1391952_at   | BE110628 | Transcribed locus, weakly similar to XP_342574.1 PREDICTED: similar to Csr1 [Rattus norvegicus]                                            | --- | 1.772 | 0.981 | 0.517 | 0.004 | 1.681 | 0.997 | 0.652 | 0.026 |
| 1390947_at   | AA891255 | Transcribed locus, weakly similar to XP_343062.2 PREDICTED: similar to RIKEN cDNA D930036F22 gene [Rattus norvegicus]                      | --- | 0.918 | 0.683 | 1.230 | 0.060 | 1.286 | 0.133 | 1.465 | 0.024 |
| 1392447_at   | AI073058 | Transcribed locus, weakly similar to XP_415605.1 PREDICTED: similar to hypothetical protein FLJ20531 [Gallus gallus]                       | --- | 1.085 | 0.911 | 1.261 | 0.513 | 1.630 | 0.103 | 1.384 | 0.999 |
| 1394576_at   | AA900572 | Transcribed locus, weakly similar to XP_417491.1 PREDICTED: similar to Serine/threonine phosphatase 4 regulatory subunit 1 [Gallus gallus] | --- | 0.500 | 0.003 | 0.619 | 0.018 | 0.508 | 0.017 | 0.606 | 0.033 |
| 1389083_at   | AI411510 | Transcribed locus, weakly similar to XP_421321.1 PREDICTED: similar to hypothetical protein FLJ20707 isoform 1 [Gallus gallus]             | --- | 1.072 | 0.459 | 0.775 | 0.144 | 1.305 | 0.378 | 0.914 | 0.303 |
| 1375856_at   | AI102258 | Transcribed locus, weakly similar to XP_426788.1 PREDICTED: similar to gene 11-1 protein precursor, partial [Gallus gallus]                | --- | 0.265 | 0.040 | 0.094 | 0.001 | 0.368 | 0.001 | 0.186 | 0.020 |
| 1376665_at   | BG670208 | Transcribed locus, weakly similar to XP_472448.1 OSJNBb0108J11.9 [Oryza sativa (japonica cultivar-group)]                                  | --- | 2.164 | 0.026 | 0.807 | 0.049 | 1.235 | 0.139 | 1.008 | 0.236 |
| 1380006_at   | AW921301 | Transcribed locus, weakly similar to XP_486128.1 PREDICTED: hypothetical protein isoform 1 [Mus musculus]                                  | --- | 0.920 | 0.729 | 1.065 | 0.362 | 1.105 | 0.270 | 1.129 | 0.757 |
| 1389650_at   | BI295153 | Transcribed locus, weakly similar to XP_512729.1 PREDICTED: hypothetical protein XP_512729 [Pan troglodytes]                               | --- | 0.311 | 0.017 | 0.415 | 0.096 | 0.441 | 0.143 | 0.597 | 0.057 |
| 1381061_at   | AI058949 | Transcribed locus, weakly similar to XP_514364.1 PREDICTED: similar to KIAA1448 protein [Pan troglodytes]                                  | --- | 1.398 | 0.052 | 2.069 | 0.249 | 1.090 | 0.496 | 0.730 | 0.310 |
| 1393501_at   | AI043579 | Transcribed locus, weakly similar to XP_517024.1 PREDICTED: similar to putative tumor suppressor [Pan troglodytes]                         | --- | 1.123 | 0.800 | 0.919 | 0.210 | 0.962 | 0.960 | 1.099 | 0.653 |
| 1379277_at   | AI575341 | Transcribed locus, weakly similar to XP_518782.1 PREDICTED: utrophin [Pan troglodytes]                                                     | --- | 0.884 | 0.654 | 0.420 | 0.000 | 0.742 | 0.025 | 0.377 | 0.000 |
| 1384621_at   | AA924327 | Transcribed locus, weakly similar to XP_519783.1 PREDICTED: similar to hypothetical protein MGC34646 [Pan troglodytes]                     | --- | 0.764 | 0.275 | 0.369 | 0.012 | 0.764 | 0.587 | 0.399 | 0.011 |
| 1384232_at   | AI709768 | Transcribed locus, weakly similar to XP_522550.1 PREDICTED: nuclear receptor co-repressor 2 [Pan troglodytes]                              | --- | 2.232 | 0.011 | 0.677 | 0.014 | 1.465 | 0.825 | 0.639 | 0.042 |
| 1384401_at   | AI059296 | Transcribed locus, weakly similar to XP_524118.1 PREDICTED: similar to zinc finger protein 433 [Pan troglodytes]                           | --- | 1.341 | 0.164 | 0.853 | 0.164 | 1.313 | 0.034 | 0.991 | 0.725 |

|              |          |                                                                                                                                                                                                      |     |       |       |       |       |       |       |       |       |
|--------------|----------|------------------------------------------------------------------------------------------------------------------------------------------------------------------------------------------------------|-----|-------|-------|-------|-------|-------|-------|-------|-------|
| 1386633_at   | BF549535 | Transcribed locus, weakly similar to XP_524118.1 PREDICTED: similar to zinc finger protein 433 [Pan troglodytes]                                                                                     | --- | 0.907 | 0.642 | 0.971 | 0.228 | 0.820 | 0.292 | 0.770 | 0.076 |
| 1374474_at   | BE099085 | Transcribed locus, weakly similar to XP_524153.1 PREDICTED: similar to ribosomal protein L18a; 60S ribosomal protein L18a [Pan troglodytes]                                                          | --- | 0.855 | 0.665 | 2.593 | 0.023 | 0.795 | 0.354 | 2.559 | 0.039 |
| 1379217_at   | AW141971 | Transcribed locus, weakly similar to XP_525946.1 PREDICTED: similar to activin A type I receptor precursor; hydroxyalkyl-protein kinase; activin A receptor, type II-like kinase 2 [Pan troglodytes] | --- | 1.199 | 0.133 | 0.839 | 0.102 | 1.051 | 0.104 | 0.940 | 0.144 |
| 1392339_at   | BF406130 | Transcribed locus, weakly similar to XP_526043.1 PREDICTED: phenylalanine-tRNA synthetase-like, beta subunit [Pan troglodytes]                                                                       | --- | 0.945 | 0.874 | 0.898 | 0.471 | 0.999 | 0.973 | 1.281 | 0.567 |
| 1383114_at   | BI296782 | Transcribed locus, weakly similar to XP_529413.1 PREDICTED: hypothetical protein XP_529413 [Pan troglodytes]                                                                                         | --- | 1.827 | 0.006 | 0.930 | 0.624 | 1.725 | 0.037 | 0.841 | 0.259 |
| 1388541_at   | BE116383 | Transcribed locus, weakly similar to XP_529532.1 PREDICTED: hypothetical protein XP_529532 [Pan troglodytes]                                                                                         | --- | 0.499 | 0.026 | 0.766 | 0.045 | 0.573 | 0.028 | 0.798 | 0.066 |
| 1376786_a_at | BF397709 | Transcribed locus, weakly similar to XP_529728.1 PREDICTED: hypothetical protein XP_529728 [Pan troglodytes]                                                                                         | --- | 0.748 | 0.140 | 0.734 | 0.008 | 0.680 | 0.099 | 0.626 | 0.011 |
| 1390468_at   | BF397709 | Transcribed locus, weakly similar to XP_529728.1 PREDICTED: hypothetical protein XP_529728 [Pan troglodytes]                                                                                         | --- | 0.930 | 0.674 | 0.509 | 0.084 | 0.769 | 0.346 | 0.471 | 0.040 |
| 1377492_at   | BM387395 | Transcribed locus, weakly similar to XP_529855.1 PREDICTED: hypothetical protein XP_529855 [Pan troglodytes]                                                                                         | --- | 0.285 | 0.037 | 0.211 | 0.002 | 0.254 | 0.034 | 0.402 | 0.023 |
| 1384287_at   | BI278552 | Transcribed locus, weakly similar to XP_529954.1 PREDICTED: hypothetical protein XP_529954 [Pan troglodytes]                                                                                         | --- | 1.989 | 0.021 | 1.329 | 0.097 | 2.238 | 0.001 | 1.289 | 0.311 |
| 1383744_at   | AI146250 | Transcribed locus, weakly similar to XP_537771.2 PREDICTED: similar to CG6734-PA [Canis familiaris]                                                                                                  | --- | 0.604 | 0.118 | 0.299 | 0.000 | 1.079 | 0.884 | 0.610 | 0.093 |
| 1389419_at   | BI296079 | Transcribed locus, weakly similar to XP_541379.2 PREDICTED: similar to zinc finger protein 91 (HPF7, HTF10) [Canis familiaris]                                                                       | --- | 1.940 | 0.048 | 2.378 | 0.014 | 1.852 | 0.050 | 1.999 | 0.034 |
| 1393543_at   | BF399884 | Transcribed locus, weakly similar to XP_541674.2 PREDICTED: similar to zinc finger protein 91 (HPF7, HTF10) isoform 1 [Canis familiaris]                                                             | --- | 0.539 | 0.025 | 0.406 | 0.041 | 0.565 | 0.044 | 0.589 | 0.010 |
| 1380026_at   | BF405898 | Transcribed locus, weakly similar to XP_573254.1 PREDICTED: similar to putative RNA binding protein 1 [Rattus norvegicus]                                                                            | --- | 1.019 | 0.495 | 1.060 | 0.078 | 1.061 | 0.857 | 1.038 | 0.155 |
| 1390270_at   | BF400616 | Transcribed locus, weakly similar to XP_573661.1 PREDICTED: similar to LRRGT00197 [Rattus norvegicus]                                                                                                | --- | 1.043 | 0.656 | 0.665 | 0.078 | 1.174 | 0.580 | 0.863 | 0.026 |
| 1396526_at   | BF410339 | Transcribed locus, weakly similar to XP_573899.1 PREDICTED: similar to Ab1-351 [Rattus norvegicus]                                                                                                   | --- | 1.456 | 0.430 | 1.364 | 0.910 | 1.175 | 0.671 | 1.598 | 0.904 |
| 1379986_at   | BM390668 | Transcribed locus, weakly similar to XP_574218.1 PREDICTED: similar to LRRGT00194 [Rattus norvegicus]                                                                                                | --- | 0.899 | 0.504 | 0.959 | 0.479 | 1.006 | 0.817 | 0.999 | 0.611 |
| 1379881_at   | BI304043 | Transcribed locus, weakly similar to XP_574512.1 PREDICTED: similar to LRRG00121 [Rattus norvegicus]                                                                                                 | --- | 0.647 | 0.026 | 0.689 | 0.011 | 0.821 | 0.413 | 0.846 | 0.444 |
| 1382911_at   | BE105150 | Transcribed locus, weakly similar to XP_574807.1 PREDICTED: similar to HORMA domain containing 1 [Rattus norvegicus]                                                                                 | --- | 1.202 | 0.694 | 1.254 | 0.207 | 1.509 | 0.039 | 1.246 | 0.271 |
| 1384496_at   | BI274749 | Transcribed locus, weakly similar to XP_574871.1 PREDICTED: similar to LRRGT00036 [Rattus norvegicus]                                                                                                | --- | 0.716 | 0.457 | 0.717 | 0.117 | 0.997 | 0.992 | 0.961 | 0.068 |
| 1393739_at   | BE108371 | Transcribed locus, weakly similar to XP_574902.1 PREDICTED: similar to LRRGT00194 [Rattus norvegicus]                                                                                                | --- | 1.144 | 0.371 | 0.794 | 0.029 | 0.829 | 0.379 | 0.706 | 0.045 |
| 1385135_at   | BE118923 | Transcribed locus, weakly similar to XP_574917.1 PREDICTED: similar to LRRGT00194 [Rattus norvegicus]                                                                                                | --- | 0.997 | 0.462 | 0.987 | 0.341 | 0.917 | 0.728 | 0.880 | 0.323 |
| 1378890_at   | BF408090 | Transcribed locus, weakly similar to XP_574992.1 PREDICTED: hypothetical protein XP_574992 [Rattus norvegicus]                                                                                       | --- | 1.030 | 0.715 | 1.362 | 0.035 | 1.025 | 0.905 | 0.975 | 0.413 |
| 1398183_at   | BE101139 | Transcribed locus, weakly similar to XP_575026.1 PREDICTED: similar to LRRGT00171 [Rattus norvegicus]                                                                                                | --- | 1.297 | 0.431 | 0.802 | 0.040 | 0.901 | 0.656 | 0.860 | 0.091 |
| 1378074_at   | AI175045 | Transcribed locus, weakly similar to XP_575132.1 PREDICTED: similar to LRRGT00012 [Rattus norvegicus]                                                                                                | --- | 0.995 | 0.895 | 1.094 | 0.182 | 0.814 | 0.465 | 1.817 | 0.141 |
| 1395500_at   | BE119104 | Transcribed locus, weakly similar to XP_575411.1 PREDICTED: similar to Ac1262 [Rattus norvegicus]                                                                                                    | --- | 0.824 | 0.099 | 0.856 | 0.519 | 0.759 | 0.172 | 1.051 | 0.799 |
| 1385303_at   | BI301855 | Transcribed locus, weakly similar to XP_575785.1 PREDICTED: similar to LRRGT00194 [Rattus norvegicus]                                                                                                | --- | 0.939 | 0.947 | 0.854 | 0.411 | 1.063 | 0.781 | 1.090 | 0.896 |
| 1379124_at   | BE103417 | Transcribed locus, weakly similar to XP_576175.1 PREDICTED: similar to Sfrs7 protein [Rattus norvegicus]                                                                                             | --- | 1.062 | 0.920 | 0.968 | 0.926 | 1.093 | 0.878 | 0.742 | 0.485 |
| 1394619_at   | AI598752 | Transcribed locus, weakly similar to XP_576199.1 PREDICTED: similar to envelope [Rattus norvegicus]                                                                                                  | --- | 1.194 | 0.692 | 0.685 | 0.015 | 1.151 | 0.491 | 0.627 | 0.040 |
| 1385172_at   | BF389065 | Transcribed locus, weakly similar to XP_576359.1 PREDICTED: similar to LRRGT00073 [Rattus norvegicus]                                                                                                | --- | 1.006 | 0.708 | 0.886 | 0.496 | 1.112 | 0.798 | 0.903 | 0.266 |
| 1394553_at   | AI007661 | Transcribed locus, weakly similar to XP_576460.1 PREDICTED: similar to hypothetical protein PB402898.00.0 [Rattus norvegicus]                                                                        | --- | 0.519 | 0.017 | 0.680 | 0.061 | 0.574 | 0.000 | 0.605 | 0.000 |
| 1395509_at   | BG666117 | Transcribed locus, weakly similar to XP_576460.1 PREDICTED: similar to hypothetical protein PB402898.00.0 [Rattus norvegicus]                                                                        | --- | 0.559 | 0.175 | 0.279 | 0.047 | 0.393 | 0.062 | 0.364 | 0.003 |
| 1394450_at   | AI228600 | Transcribed locus, weakly similar to XP_576460.1 PREDICTED: similar to hypothetical protein PB402898.00.0 [Rattus norvegicus]                                                                        | --- | 0.554 | 0.187 | 0.204 | 0.016 | 0.630 | 0.016 | 0.552 | 0.098 |
| 1378404_at   | AW435040 | Transcribed locus, weakly similar to XP_576460.1 PREDICTED: similar to hypothetical protein PB402898.00.0 [Rattus norvegicus]                                                                        | --- | 1.014 | 0.238 | 0.863 | 0.021 | 0.695 | 0.065 | 1.335 | 0.126 |
| 1389606_at   | BI303298 | Transcribed locus, weakly similar to XP_576460.1 PREDICTED: similar to hypothetical protein PB402898.00.0 [Rattus norvegicus]                                                                        | --- | 0.473 | 0.321 | 0.640 | 0.001 | 0.589 | 0.033 | 0.657 | 0.018 |
| 1397900_at   | BG375046 | Transcribed locus, weakly similar to XP_576460.1 PREDICTED: similar to hypothetical protein PB402898.00.0 [Rattus norvegicus]                                                                        | --- | 0.909 | 0.779 | 1.024 | 0.684 | 1.093 | 0.792 | 1.052 | 0.696 |
| 1372694_at   | AI407148 | Transcribed locus, weakly similar to XP_576460.1 PREDICTED: similar to hypothetical protein PB402898.00.0 [Rattus norvegicus]                                                                        | --- | 0.990 | 0.940 | 1.131 | 0.482 | 1.062 | 0.758 | 1.375 | 0.158 |
| 1390159_at   | AA819332 | Transcribed locus, weakly similar to XP_576460.1 PREDICTED: similar to hypothetical protein PB402898.00.0 [Rattus norvegicus]                                                                        | --- | 1.327 | 0.984 | 0.648 | 0.064 | 1.519 | 0.202 | 1.142 | 0.895 |

|            |          |                                                                                                                                                                                 |     |       |       |        |       |       |       |       |       |
|------------|----------|---------------------------------------------------------------------------------------------------------------------------------------------------------------------------------|-----|-------|-------|--------|-------|-------|-------|-------|-------|
| 1378473_at | BE107166 | Transcribed locus, weakly similar to XP_576460.1 PREDICTED: similar to hypothetical protein PB402898.00.0 [Rattus norvegicus]                                                   | --- | 0.907 | 0.989 | 0.698  | 0.203 | 0.908 | 0.755 | 0.969 | 0.656 |
| 1373053_at | AI169620 | Transcribed locus, weakly similar to XP_576559.1 PREDICTED: similar to Ormdl1 protein [Rattus norvegicus]                                                                       | --- | 0.470 | 0.010 | 0.924  | 0.800 | 0.464 | 0.014 | 0.744 | 0.735 |
| 1377774_at | AI029275 | Transcribed locus, weakly similar to XP_576559.1 PREDICTED: similar to Ormdl1 protein [Rattus norvegicus]                                                                       | --- | 1.070 | 0.250 | 0.884  | 0.289 | 0.724 | 0.217 | 0.884 | 0.182 |
| 1379512_at | BF396579 | Transcribed locus, weakly similar to XP_576934.1 PREDICTED: similar to ORF2 consensus sequence encoding endonuclease and reverse transcriptase minus RNaseH [Rattus norvegicus] | --- | 1.013 | 0.995 | 0.968  | 0.812 | 1.034 | 0.860 | 1.005 | 0.578 |
| 1397755_at | AI575649 | Transcribed locus, weakly similar to XP_577160.1 PREDICTED: similar to LRRGT00088 [Rattus norvegicus]                                                                           | --- | 1.243 | 0.811 | 0.649  | 0.260 | 0.959 | 0.623 | 1.044 | 0.774 |
| 1385454_at | AW526025 | Transcribed locus, weakly similar to XP_577160.1 PREDICTED: similar to LRRGT00088 [Rattus norvegicus]                                                                           | --- | 1.211 | 0.892 | 0.952  | 0.819 | 1.014 | 0.830 | 0.994 | 0.971 |
| 1384691_at | BE113194 | Transcribed locus, weakly similar to XP_577161.1 PREDICTED: similar to ORF2 consensus sequence encoding endonuclease and reverse transcriptase minus RNaseH [Rattus norvegicus] | --- | 1.138 | 0.839 | 1.139  | 0.072 | 1.197 | 0.545 | 0.899 | 0.186 |
| 1397570_at | BF410161 | Transcribed locus, weakly similar to XP_577194.1 PREDICTED: similar to CG13990-PA [Rattus norvegicus]                                                                           | --- | 2.002 | 0.930 | 1.597  | 0.533 | 1.324 | 0.456 | 4.656 | 0.111 |
| 1385267_at | AW433616 | Transcribed locus, weakly similar to XP_577796.1 PREDICTED: similar to LRRGT00049 [Rattus norvegicus]                                                                           | --- | 0.976 | 0.610 | 0.647  | 0.107 | 1.031 | 0.906 | 0.903 | 0.353 |
| 1395093_at | AI145025 | Transcribed locus, weakly similar to XP_578830.1 PREDICTED: similar to LRRGT00191 [Rattus norvegicus]                                                                           | --- | 0.649 | 0.330 | 1.128  | 0.109 | 1.354 | 0.906 | 1.324 | 0.038 |
| 1381115_at | AW536039 | Transcribed locus, weakly similar to XP_579465.1 PREDICTED: DNA binding protein N5 [Rattus norvegicus]                                                                          | --- | 1.011 | 0.835 | 0.951  | 0.375 | 1.164 | 0.398 | 0.951 | 0.651 |
| 1385347_at | BE103484 | Transcribed locus, weakly similar to XP_579981.1 PREDICTED: hypothetical protein XP_579981 [Rattus norvegicus]                                                                  | --- | 0.778 | 0.319 | 0.957  | 0.177 | 0.814 | 0.032 | 0.920 | 0.177 |
| 1389369_at | BF289017 | Transcribed locus, weakly similar to XP_579981.1 PREDICTED: hypothetical protein XP_579981 [Rattus norvegicus]                                                                  | --- | 1.049 | 0.563 | 0.804  | 0.024 | 1.108 | 0.185 | 0.939 | 0.061 |
| 1382278_at | BI278180 | Transcribed locus, weakly similar to XP_580018.1 PREDICTED: hypothetical protein XP_580018 [Rattus norvegicus]                                                                  | --- | 7.560 | 0.002 | 13.014 | 0.002 | 6.205 | 0.006 | 8.721 | 0.012 |
| 1372796_at | AA894188 | Transcribed locus, weakly similar to XP_580018.1 PREDICTED: hypothetical protein XP_580018 [Rattus norvegicus]                                                                  | --- | 1.742 | 0.006 | 1.629  | 0.013 | 1.265 | 0.954 | 1.478 | 0.023 |
| 1372121_at | BF284408 | Transcribed locus, weakly similar to XP_580018.1 PREDICTED: hypothetical protein XP_580018 [Rattus norvegicus]                                                                  | --- | 0.637 | 0.014 | 0.256  | 0.001 | 0.741 | 0.078 | 0.325 | 0.007 |
| 1381714_at | BE105488 | Transcribed locus, weakly similar to XP_580018.1 PREDICTED: hypothetical protein XP_580018 [Rattus norvegicus]                                                                  | --- | 0.973 | 0.035 | 1.190  | 0.522 | 1.367 | 0.115 | 1.321 | 0.811 |
| 1392903_at | BG665185 | Transcribed locus, weakly similar to XP_580018.1 PREDICTED: hypothetical protein XP_580018 [Rattus norvegicus]                                                                  | --- | 0.800 | 0.045 | 0.739  | 0.003 | 0.946 | 0.251 | 0.771 | 0.036 |
| 1377462_at | BE111349 | Transcribed locus, weakly similar to XP_580018.1 PREDICTED: hypothetical protein XP_580018 [Rattus norvegicus]                                                                  | --- | 0.657 | 0.073 | 1.122  | 0.478 | 0.543 | 0.028 | 1.126 | 0.991 |
| 1383423_at | BI295136 | Transcribed locus, weakly similar to XP_580018.1 PREDICTED: hypothetical protein XP_580018 [Rattus norvegicus]                                                                  | --- | 0.377 | 0.077 | 0.278  | 0.006 | 0.499 | 0.053 | 0.387 | 0.006 |
| 1397706_at | BF388794 | Transcribed locus, weakly similar to XP_580018.1 PREDICTED: hypothetical protein XP_580018 [Rattus norvegicus]                                                                  | --- | 3.445 | 0.085 | 0.553  | 0.089 | 4.491 | 0.001 | 1.633 | 0.997 |
| 1395240_at | BG665321 | Transcribed locus, weakly similar to XP_580018.1 PREDICTED: hypothetical protein XP_580018 [Rattus norvegicus]                                                                  | --- | 1.354 | 0.153 | 1.001  | 0.846 | 1.000 | 0.163 | 1.001 | 0.991 |
| 1390504_at | AW524470 | Transcribed locus, weakly similar to XP_580018.1 PREDICTED: hypothetical protein XP_580018 [Rattus norvegicus]                                                                  | --- | 0.849 | 0.190 | 0.984  | 0.949 | 0.731 | 0.095 | 1.069 | 0.790 |
| 1379996_at | AI411753 | Transcribed locus, weakly similar to XP_580018.1 PREDICTED: hypothetical protein XP_580018 [Rattus norvegicus]                                                                  | --- | 0.704 | 0.191 | 0.462  | 0.001 | 0.520 | 0.232 | 0.584 | 0.002 |
| 1382820_at | AI176342 | Transcribed locus, weakly similar to XP_580018.1 PREDICTED: hypothetical protein XP_580018 [Rattus norvegicus]                                                                  | --- | 0.632 | 0.279 | 1.559  | 0.267 | 0.957 | 0.864 | 1.444 | 0.223 |
| 1371595_at | BM384301 | Transcribed locus, weakly similar to XP_580018.1 PREDICTED: hypothetical protein XP_580018 [Rattus norvegicus]                                                                  | --- | 1.429 | 0.362 | 16.953 | 0.001 | 1.286 | 0.861 | 9.407 | 0.004 |
| 1392475_at | BE104169 | Transcribed locus, weakly similar to XP_580018.1 PREDICTED: hypothetical protein XP_580018 [Rattus norvegicus]                                                                  | --- | 1.230 | 0.368 | 1.715  | 0.006 | 1.127 | 0.916 | 1.376 | 0.004 |
| 1397164_at | AI175779 | Transcribed locus, weakly similar to XP_580018.1 PREDICTED: hypothetical protein XP_580018 [Rattus norvegicus]                                                                  | --- | 1.437 | 0.401 | 3.751  | 0.001 | 1.871 | 0.080 | 2.679 | 0.005 |
| 1382510_at | BE105050 | Transcribed locus, weakly similar to XP_580018.1 PREDICTED: hypothetical protein XP_580018 [Rattus norvegicus]                                                                  | --- | 0.873 | 0.424 | 0.752  | 0.066 | 0.670 | 0.016 | 0.648 | 0.121 |
| 1377237_at | AI137274 | Transcribed locus, weakly similar to XP_580018.1 PREDICTED: hypothetical protein XP_580018 [Rattus norvegicus]                                                                  | --- | 1.121 | 0.451 | 0.822  | 0.058 | 1.300 | 0.627 | 0.584 | 0.011 |
| 1395327_at | AW522341 | Transcribed locus, weakly similar to XP_580018.1 PREDICTED: hypothetical protein XP_580018 [Rattus norvegicus]                                                                  | --- | 0.641 | 0.521 | 1.758  | 0.105 | 1.159 | 0.161 | 1.448 | 0.059 |
| 1390276_at | BI296669 | Transcribed locus, weakly similar to XP_580018.1 PREDICTED: hypothetical protein XP_580018 [Rattus norvegicus]                                                                  | --- | 1.176 | 0.536 | 0.898  | 0.975 | 1.312 | 0.007 | 1.093 | 0.457 |
| 1391553_at | AA956757 | Transcribed locus, weakly similar to XP_580018.1 PREDICTED: hypothetical protein XP_580018 [Rattus norvegicus]                                                                  | --- | 0.753 | 0.553 | 0.611  | 0.102 | 1.001 | 0.995 | 0.681 | 0.021 |
| 1371506_at | AA891207 | Transcribed locus, weakly similar to XP_580018.1 PREDICTED: hypothetical protein XP_580018 [Rattus norvegicus]                                                                  | --- | 0.822 | 0.643 | 0.819  | 0.236 | 1.175 | 0.392 | 0.981 | 0.818 |

|              |           |                                                                                                                                                               |                     |       |       |       |       |       |       |       |       |
|--------------|-----------|---------------------------------------------------------------------------------------------------------------------------------------------------------------|---------------------|-------|-------|-------|-------|-------|-------|-------|-------|
| 1378591_at   | AI556452  | Transcribed locus, weakly similar to XP_580018.1 PREDICTED: hypothetical protein XP_580018 [Rattus norvegicus]                                                | ---                 | 0.996 | 0.951 | 2.983 | 0.001 | 0.599 | 0.051 | 2.274 | 0.003 |
| 1378508_at   | BE108221  | Transcribed locus, weakly similar to XP_580237.1 PREDICTED: hypothetical protein XP_580237 [Rattus norvegicus]                                                | ---                 | 2.454 | 0.048 | 2.375 | 0.023 | 2.503 | 0.004 | 1.436 | 0.018 |
| 1373984_at   | AA850715  | Transcribed locus, weakly similar to XP_849895.1 PREDICTED: similar to Argininosuccinate synthase (Citrulline--aspartate ligase) isoform 3 [Canis familiaris] | ---                 | 0.444 | 0.388 | 0.598 | 0.037 | 0.375 | 0.012 | 0.538 | 0.010 |
| 1372733_at   | BM391852  | Transcribed locus, weakly similar to XP_850062.1 PREDICTED: similar to conserved nuclear protein Nhn1 isoform 3 [Canis familiaris]                            | ---                 | 0.965 | 0.279 | 0.981 | 0.214 | 0.635 | 0.236 | 0.939 | 0.386 |
| 1390300_at   | BM383635  | Transcribed locus, weakly similar to XP_851979.1 PREDICTED: similar to LINE-1 reverse transcriptase homolog [Canis familiaris]                                | ---                 | 1.198 | 0.787 | 0.962 | 0.166 | 1.018 | 0.544 | 0.847 | 0.223 |
| 1375707_at   | AA817993  | Transcribed locus, weakly similar to XP_855499.1 PREDICTED: similar to Zinc finger X-linked protein ZXDB [Canis familiaris]                                   | ---                 | 1.063 | 0.890 | 1.009 | 0.255 | 1.360 | 0.107 | 1.223 | 0.128 |
| 1383255_at   | BE116202  | Transcribed locus, weakly similar to XP_862893.1 PREDICTED: similar to LINE-1 reverse transcriptase homolog isoform 2 [Canis familiaris]                      | ---                 | 2.392 | 0.002 | 1.129 | 0.053 | 4.268 | 0.002 | 1.454 | 0.027 |
| 1374845_at   | AI176367  | Transcribed locus, weakly similar to XP_864243.1 PREDICTED: similar to chaperonin containing TCP1, subunit 3 isoform c isoform 2 [Canis familiaris]           | ---                 | 0.942 | 0.639 | 3.746 | 0.001 | 1.357 | 0.300 | 1.326 | 0.180 |
| 1394724_at   | BE109084  | transcription elongation factor A (SII) 1                                                                                                                     | Tcea1               | 1.324 | 0.038 | 1.650 | 0.050 | 1.412 | 0.000 | 1.586 | 0.138 |
| 1367485_at   | BM388871  | transcription elongation factor A (SII) 1 /// similar to transcription elongation factor IIS - mouse                                                          | Tcea1 /// LOC498453 | 1.379 | 0.100 | 1.356 | 0.047 | 1.721 | 0.049 | 1.982 | 0.014 |
| 1388611_at   | AW252817  | transcription elongation factor A (SII), 3                                                                                                                    | Tcea3               | 0.996 | 0.864 | 0.753 | 0.127 | 1.064 | 0.047 | 0.983 | 0.190 |
| 1391212_at   | BF418812  | transcription elongation factor A (SII)-like 1                                                                                                                | Tceal1              | 0.284 | 0.006 | 0.181 | 0.015 | 0.465 | 0.004 | 0.364 | 0.002 |
| 1375521_at   | AI230334  | transcription elongation factor A (SII)-like 8                                                                                                                | Tceal8              | 0.401 | 0.394 | 0.489 | 0.039 | 0.539 | 0.134 | 0.552 | 0.013 |
| 1398794_at   | NM_022593 | transcription elongation factor B (SIII), polypeptide 1                                                                                                       | Tceb1               | 1.209 | 0.693 | 1.167 | 0.752 | 1.073 | 0.615 | 1.186 | 0.640 |
| 1398837_at   | NM_031129 | transcription elongation factor B (SIII), polypeptide 2                                                                                                       | Tceb2               | 1.026 | 0.586 | 1.426 | 0.045 | 1.033 | 0.152 | 1.288 | 0.052 |
| 1389778_a_at | AI233115  | transcription elongation factor B (SIII), polypeptide 3                                                                                                       | Tceb3               | 0.954 | 0.171 | 1.416 | 0.034 | 1.022 | 0.036 | 1.423 | 0.502 |
| 1368997_at   | NM_017103 | transcription elongation factor B (SIII), polypeptide 3                                                                                                       | Tceb3               | 0.830 | 0.270 | 0.786 | 0.427 | 0.641 | 0.067 | 0.789 | 0.023 |
| 1371787_at   | AI231686  | Transcription elongation factor B (SIII), polypeptide 3                                                                                                       | Tceb3               | 1.005 | 0.989 | 1.126 | 0.216 | 0.907 | 0.832 | 1.000 | 0.152 |
| 1372151_at   | AI317851  | transcription elongation regulator 1 (CA150) (predicted)                                                                                                      | Tcerg1_predicted    | 1.511 | 0.097 | 2.300 | 0.002 | 1.364 | 0.016 | 1.756 | 0.005 |
| 1390871_at   | BF286230  | transcription elongation regulator 1 (CA150) (predicted)                                                                                                      | Tcerg1_predicted    | 1.020 | 0.627 | 1.242 | 0.079 | 0.858 | 0.706 | 0.799 | 0.159 |
| 1369148_at   | NM_012669 | transcription factor 1                                                                                                                                        | Tcf1                | 1.275 | 0.372 | 2.168 | 0.008 | 1.589 | 0.124 | 2.116 | 0.072 |
| 1389555_at   | BM387190  | transcription factor 19                                                                                                                                       | Tcf19               | 0.617 | 0.040 | 0.163 | 0.039 | 0.756 | 0.022 | 0.609 | 0.063 |
| 1390817_at   | BF394639  | transcription factor 20 (mapped)                                                                                                                              | Tcf20_mapped        | 1.110 | 0.546 | 0.458 | 0.011 | 0.636 | 0.385 | 0.634 | 0.009 |
| 1390390_at   | BM386814  | transcription factor 20 (mapped)                                                                                                                              | Tcf20_mapped        | 1.209 | 0.829 | 1.431 | 0.014 | 0.458 | 0.143 | 1.255 | 0.037 |
| 1384640_at   | AA997287  | Transcription factor 20 (mapped)                                                                                                                              | Tcf20_mapped        | 1.127 | 0.929 | 1.370 | 0.111 | 1.236 | 0.998 | 1.540 | 0.171 |
| 1388782_at   | BE113336  | transcription factor 21                                                                                                                                       | Tcf21               | 0.990 | 0.949 | 0.999 | 0.994 | 0.994 | 0.951 | 0.999 | 0.987 |
| 1391992_at   | AI639517  | Transcription factor 4                                                                                                                                        | Tcf4                | 0.319 | 0.048 | 0.627 | 0.046 | 0.398 | 0.028 | 0.458 | 0.023 |
| 1396157_at   | BF548958  | Transcription factor 4                                                                                                                                        | Tcf4                | 0.798 | 0.175 | 0.973 | 0.813 | 0.717 | 0.177 | 0.991 | 0.934 |
| 1368842_at   | BG377130  | transcription factor 4                                                                                                                                        | Tcf4                | 0.909 | 0.391 | 0.316 | 0.000 | 0.555 | 0.024 | 0.466 | 0.005 |
| 1397286_at   | AW435211  | Transcription factor 4                                                                                                                                        | Tcf4                | 1.472 | 0.903 | 1.284 | 0.658 | 1.044 | 0.268 | 1.192 | 0.985 |
| 1368841_at   | NM_053369 | transcription factor 4                                                                                                                                        | Tcf4                | 1.000 | 0.999 | 0.620 | 0.027 | 1.352 | 0.085 | 0.495 | 0.028 |
| 1376197_at   | AW251860  | transcription factor 7, T-cell specific (predicted)                                                                                                           | Tcf7_predicted      | 1.021 | 0.048 | 0.683 | 0.960 | 1.435 | 0.005 | 0.664 | 0.341 |
| 1370965_at   | BG381660  | transcription factor 8                                                                                                                                        | Tcf8                | 3.660 | 0.017 | 6.815 | 0.000 | 6.696 | 0.015 | 6.057 | 0.000 |
| 1367941_at   | NM_031326 | transcription factor A, mitochondrial                                                                                                                         | Tfam                | 0.649 | 0.120 | 1.179 | 0.022 | 0.655 | 0.002 | 1.063 | 0.044 |
| 1392545_at   | AA999089  | transcription factor AP-2 beta (predicted)                                                                                                                    | Tcfap2b_predicted   | 0.938 | 0.510 | 2.409 | 0.162 | 0.737 | 0.830 | 1.647 | 0.061 |
| 1386435_at   | AI101186  | transcription factor AP4 (predicted)                                                                                                                          | Tcfap4_predicted    | 0.943 | 0.417 | 1.621 | 0.059 | 0.781 | 0.059 | 1.306 | 0.009 |
| 1379949_at   | AI010265  | transcription factor B1, mitochondrial                                                                                                                        | Tfb1m               | 0.766 | 0.295 | 1.510 | 0.699 | 0.653 | 0.148 | 1.085 | 0.413 |
| 1383171_at   | BG373674  | transcription factor B2, mitochondrial                                                                                                                        | Tfb2m               | 0.362 | 0.013 | 0.456 | 0.018 | 0.656 | 0.204 | 0.740 | 0.043 |
| 1378218_at   | AW527419  | transcription factor CP2 (predicted)                                                                                                                          | Tcfcp2_predicted    | 1.567 | 0.277 | 2.238 | 0.069 | 1.159 | 0.144 | 1.342 | 0.128 |
| 1379914_at   | AI716050  | transcription factor CP2-like 2                                                                                                                               | Tcfcp2l2            | 1.562 | 0.851 | 1.499 | 0.211 | 1.124 | 0.850 | 0.998 | 0.852 |
| 1393545_at   | AI043906  | transcription factor CP2-like 2                                                                                                                               | Tcfcp2l2            | 0.821 | 0.998 | 3.019 | 0.000 | 0.766 | 0.915 | 1.293 | 0.016 |
| 1388967_at   | AI012945  | transcription factor E3 (predicted)                                                                                                                           | Tcfe3_predicted     | 1.614 | 0.051 | 1.668 | 0.020 | 1.565 | 0.035 | 1.734 | 0.007 |
| 1373327_at   | BE112887  | transcription factor EB                                                                                                                                       | Tcfef               | 1.056 | 0.494 | 1.093 | 0.965 | 1.001 | 0.989 | 1.163 | 0.151 |
| 1385125_at   | BF397140  | transcription factor myocardin                                                                                                                                | Myocd               | 1.465 | 0.608 | 1.083 | 0.149 | 1.485 | 0.334 | 0.857 | 0.126 |
| 1374205_at   | BI284455  | transcription factor Pur-beta                                                                                                                                 | pur-beta            | 1.349 | 0.080 | 0.839 | 0.337 | 0.876 | 0.791 | 1.082 | 0.533 |
| 1393521_at   | AI232280  | Transcription termination factor, RNA polymerase II (predicted)                                                                                               | Ttf2_predicted      | 1.525 | 0.096 | 1.212 | 0.337 | 1.137 | 0.100 | 1.017 | 0.197 |
| 1373238_at   | AI234844  | transcriptional adaptor 1 (HFI1 homolog, yeast) like                                                                                                          | Tada1l              | 1.157 | 0.113 | 2.723 | 0.009 | 1.930 | 0.081 | 2.135 | 0.009 |
| 1397852_at   | H32108    | transcriptional adaptor 1 (HFI1 homolog, yeast) like                                                                                                          | Tada1l              | 1.022 | 0.898 | 1.503 | 0.237 | 1.006 | 0.995 | 0.999 | 0.996 |
| 1378617_at   | BM390846  | transcriptional regulating factor 1 (predicted)                                                                                                               | Trerf1_predicted    | 1.246 | 0.429 | 1.240 | 0.496 | 1.010 | 0.600 | 1.041 | 0.399 |
| 1379182_at   | BE105382  | Transcriptional regulating factor 1 (predicted)                                                                                                               | Trerf1_predicted    | 0.783 | 0.494 | 0.360 | 0.097 | 1.326 | 0.287 | 0.405 | 0.093 |
| 1391498_at   | AI072877  | transcriptional regulator, SIN3A (yeast) (predicted)                                                                                                          | Sin3a_predicted     | 0.582 | 0.062 | 1.049 | 0.084 | 0.665 | 0.061 | 1.036 | 0.221 |
| 1375677_at   | BI275222  | transducer of ERBB2, 2                                                                                                                                        | Tob2                | 0.888 | 0.968 | 0.771 | 0.090 | 0.919 | 0.422 | 1.057 | 0.911 |
| 1368132_at   | NM_133317 | transducer of ErbB-2.1                                                                                                                                        | Tob1                | 0.559 | 0.014 | 0.698 | 0.040 | 0.355 | 0.045 | 0.637 | 0.385 |

|              |           |                                                                                                                                                  |                                    |       |       |       |       |       |       |       |       |
|--------------|-----------|--------------------------------------------------------------------------------------------------------------------------------------------------|------------------------------------|-------|-------|-------|-------|-------|-------|-------|-------|
| 1379469_at   | AA955760  | transducin (beta)-like 1 X-linked (predicted)                                                                                                    | Tbl1x_predicted                    | 1.012 | 0.361 | 4.575 | 0.031 | 1.006 | 0.935 | 3.821 | 0.048 |
| 1393491_at   | BF398496  | transducin (beta)-like 1 X-linked (predicted)                                                                                                    | Tbl1x_predicted                    | 0.990 | 0.970 | 0.996 | 0.954 | 0.999 | 0.996 | 1.001 | 0.992 |
| 1379309_at   | AI030742  | Transducin (beta)-like 1X-linked receptor 1 (predicted)                                                                                          | Tbl1xr1_predicted                  | 3.265 | 0.041 | 1.813 | 0.068 | 1.001 | 0.038 | 1.655 | 0.058 |
| 1386070_at   | AA859701  | Transducin (beta)-like 1X-linked receptor 1 (predicted)                                                                                          | Tbl1xr1_predicted                  | 2.469 | 0.058 | 1.181 | 0.102 | 0.991 | 0.905 | 1.067 | 0.201 |
| 1372661_at   | AI406314  | transducin (beta)-like 3                                                                                                                         | Tbl3                               | 0.758 | 0.032 | 1.063 | 0.975 | 0.549 | 0.065 | 1.624 | 0.973 |
| 1374425_at   | BG380534  | transducin-like enhancer of split 1, homolog of Drosophila E(spl) (predicted)                                                                    | Tle1_predicted                     | 1.061 | 0.625 | 0.505 | 0.052 | 1.378 | 0.703 | 0.338 | 0.026 |
| 1387169_at   | NM_053400 | transducin-like enhancer of split 3, E(spl) homolog (Drosophila)                                                                                 | Tle3                               | 3.573 | 0.001 | 2.665 | 0.001 | 2.224 | 0.019 | 2.286 | 0.001 |
| 1388750_at   | BF417032  | transferrin receptor                                                                                                                             | Tfrc                               | 0.533 | 0.133 | 2.423 | 0.000 | 0.662 | 0.047 | 2.555 | 0.002 |
| 1371113_a_at | M58040    | transferrin receptor                                                                                                                             | Tfrc                               | 0.389 | 0.201 | 5.692 | 0.000 | 0.415 | 0.208 | 4.251 | 0.000 |
| 1374788_at   | AI235252  | transformation related protein 53 binding protein 1 (predicted)                                                                                  | Trp53bp1_predicted                 | 1.063 | 0.687 | 1.037 | 0.250 | 1.227 | 0.574 | 1.121 | 0.274 |
| 1384140_at   | BF288836  | Transformation related protein 53 binding protein 1 (predicted)                                                                                  | Trp53bp1_predicted                 | 0.945 | 0.739 | 1.005 | 0.976 | 0.906 | 0.729 | 0.877 | 0.938 |
| 1383981_at   | BE102377  | transformation related protein 53 binding protein 2 (predicted)                                                                                  | Trp53bp2_predicted                 | 1.477 | 0.055 | 1.260 | 0.454 | 1.487 | 0.451 | 0.763 | 0.747 |
| 1369108_at   | NM_019221 | transformation related protein 63                                                                                                                | Trp63                              | 1.008 | 0.672 | 0.796 | 0.138 | 1.226 | 0.452 | 0.858 | 0.857 |
| 1384427_at   | BI296301  | transformed mouse 3T3 cell double minute 2 homolog (mouse) (predicted)                                                                           | Mdm2_predicted                     | 2.589 | 0.033 | 8.044 | 0.002 | 1.480 | 0.036 | 5.358 | 0.006 |
| 1383485_at   | BF548539  | transformed mouse 3T3 cell double minute 2 homolog (mouse) (predicted)                                                                           | Mdm2_predicted                     | 1.007 | 0.884 | 1.658 | 0.389 | 1.022 | 0.917 | 2.137 | 0.107 |
| 1382417_at   | AI236886  | transformed mouse 3T3 cell double minute 4                                                                                                       | Mdm4                               | 1.501 | 0.002 | 2.552 | 0.021 | 1.053 | 0.978 | 1.538 | 0.146 |
| 1377973_at   | BF402062  | Transformed mouse 3T3 cell double minute 4                                                                                                       | Mdm4                               | 0.992 | 0.879 | 1.167 | 0.633 | 1.106 | 0.762 | 1.884 | 0.223 |
| 1381449_s_at | BG670310  | transforming growth factor alpha                                                                                                                 | Tgfa                               | 0.725 | 0.234 | 0.516 | 0.371 | 0.478 | 0.012 | 0.613 | 0.021 |
| 1378081_at   | BI285065  | Transforming growth factor beta 1 induced transcript 4                                                                                           | Tgfb1i4                            | 0.279 | 0.004 | 0.778 | 0.040 | 0.093 | 0.001 | 0.642 | 0.033 |
| 1398759_at   | NM_013043 | transforming growth factor beta 1 induced transcript 4                                                                                           | Tgfb1i4                            | 1.074 | 0.230 | 0.928 | 0.136 | 0.966 | 0.623 | 0.879 | 0.287 |
| 1371509_at   | BG666773  | transforming growth factor beta regulated gene 1                                                                                                 | Tbrg1                              | 1.207 | 0.350 | 1.690 | 0.007 | 1.232 | 0.125 | 2.081 | 0.007 |
| 1374577_at   | AW254561  | transforming growth factor beta regulated gene 4                                                                                                 | Tbrg4                              | 0.553 | 0.189 | 1.812 | 0.014 | 0.447 | 0.086 | 1.397 | 0.052 |
| 1387172_a_at | NM_031131 | transforming growth factor, beta 2                                                                                                               | Tgfb2                              | 0.721 | 0.004 | 0.251 | 0.009 | 0.667 | 0.005 | 0.450 | 0.016 |
| 1378963_at   | AA963004  | Transforming growth factor, beta 2                                                                                                               | Tgfb2                              | 0.597 | 0.027 | 0.329 | 0.002 | 0.607 | 0.160 | 0.296 | 0.011 |
| 1376425_at   | BF420705  | Transforming growth factor, beta 2                                                                                                               | Tgfb2                              | 0.924 | 0.128 | 0.164 | 0.000 | 0.759 | 0.126 | 0.161 | 0.006 |
| 1392382_at   | BE117736  | Transforming growth factor, beta 2                                                                                                               | Tgfb2                              | 0.498 | 0.409 | 0.366 | 0.016 | 1.093 | 0.765 | 0.496 | 0.024 |
| 1367859_at   | NM_013174 | transforming growth factor, beta 3                                                                                                               | Tgfb3                              | 0.955 | 0.728 | 0.994 | 0.929 | 0.882 | 0.387 | 0.999 | 0.923 |
| 1371913_at   | BG379319  | transforming growth factor, beta induced                                                                                                         | Tgfb1                              | 1.523 | 0.140 | 1.140 | 0.009 | 1.004 | 0.974 | 1.084 | 0.440 |
| 1376636_at   | BE111972  | transforming growth factor, beta receptor 1                                                                                                      | Tgfbr1                             | 0.903 | 0.196 | 1.060 | 0.199 | 0.688 | 0.147 | 1.016 | 0.073 |
| 1369504_at   | NM_012775 | transforming growth factor, beta receptor 1                                                                                                      | Tgfbr1                             | 1.001 | 0.861 | 1.093 | 0.131 | 1.001 | 0.955 | 1.008 | 0.970 |
| 1390149_at   | BI286164  | transforming, acidic coiled-coil containing protein 2                                                                                            | Tacc2                              | 1.201 | 0.117 | 2.162 | 0.013 | 1.305 | 0.026 | 2.854 | 0.009 |
| 1388335_at   | BI285865  | transgelin 2                                                                                                                                     | Tagln2                             | 1.152 | 0.245 | 1.217 | 0.027 | 1.153 | 0.087 | 1.138 | 0.020 |
| 1387529_a_at | NM_031676 | transgelin 3                                                                                                                                     | Tagln3                             | 0.258 | 0.043 | 0.051 | 0.000 | 0.253 | 0.034 | 0.170 | 0.000 |
| 1389965_at   | AA799818  | trans-golgi network protein 2                                                                                                                    | Tgoln2                             | 0.772 | 0.215 | 0.512 | 0.003 | 0.833 | 0.456 | 0.575 | 0.004 |
| 1371028_at   | AW917192  | trans-golgi network protein 2                                                                                                                    | Tgoln2                             | 1.026 | 0.894 | 0.273 | 0.006 | 0.990 | 0.978 | 0.340 | 0.008 |
| 1370411_at   | AF061266  | transient receptor potential cation channel, subfamily C, member 1                                                                               | Trpc1                              | 1.149 | 0.806 | 0.361 | 0.000 | 1.121 | 0.229 | 0.425 | 0.004 |
| 1371584_at   | BM390843  | transient receptor potential cation channel, subfamily C, member 4 associated protein                                                            | Trpc4ap                            | 1.028 | 0.877 | 1.276 | 0.028 | 1.061 | 0.532 | 1.588 | 0.074 |
| 1398279_at   | NM_053787 | transient receptor potential cation channel, subfamily V, member 5                                                                               | Trpv5                              | 1.475 | 0.519 | 1.021 | 0.210 | 1.407 | 0.352 | 0.728 | 0.031 |
| 1398355_at   | AI232142  | Transient receptor potential-related protein, ChaK                                                                                               | Trpm7                              | 1.135 | 0.419 | 1.346 | 0.088 | 1.182 | 0.216 | 1.119 | 0.070 |
| 1369059_at   | NM_053705 | transient receptor potential-related protein, ChaK                                                                                               | Trpm7                              | 0.998 | 0.990 | 0.930 | 0.269 | 0.950 | 0.498 | 0.572 | 0.332 |
| 1386859_at   | NM_022592 | transketolase                                                                                                                                    | Tkt                                | 0.557 | 0.251 | 1.555 | 0.005 | 0.438 | 0.002 | 1.271 | 0.055 |
| 1367728_at   | NM_021762 | translin                                                                                                                                         | Tsn                                | 1.220 | 0.570 | 1.061 | 0.966 | 1.982 | 0.805 | 0.998 | 0.656 |
| 1387653_at   | BI283853  | translin-associated factor X                                                                                                                     | Tsnax                              | 0.800 | 0.040 | 0.667 | 0.009 | 0.867 | 0.256 | 0.872 | 0.144 |
| 1398823_at   | AF262357  | translin-associated factor X                                                                                                                     | Tsnax                              | 0.843 | 0.522 | 0.526 | 0.123 | 0.801 | 0.434 | 0.595 | 0.130 |
| 1370366_at   | AF150091  | translocase of inner mitochondrial membrane 10 homolog (yeast)                                                                                   | Timm10                             | 0.720 | 0.722 | 2.940 | 0.006 | 0.572 | 0.170 | 3.141 | 0.002 |
| 1398868_at   | AI408157  | translocase of inner mitochondrial membrane 13 homolog (yeast)                                                                                   | Timm13                             | 0.824 | 0.836 | 2.320 | 0.018 | 0.582 | 0.017 | 1.969 | 0.012 |
| 1375565_at   | BF420723  | translocase of inner mitochondrial membrane 22 homolog (yeast)                                                                                   | Timm22                             | 0.539 | 0.014 | 0.873 | 0.351 | 0.564 | 0.012 | 0.882 | 0.364 |
| 1370353_at   | AF223951  | translocase of inner mitochondrial membrane 22 homolog (yeast)                                                                                   | Timm22                             | 0.585 | 0.042 | 1.089 | 0.771 | 0.449 | 0.003 | 0.827 | 0.173 |
| 1398763_at   | NM_019352 | translocase of inner mitochondrial membrane 23 homolog (yeast) /// similar to Translocase of inner mitochondrial membrane 23 homolog (predicted) | Timm23 ///<br>RGD1559672_predicted | 0.993 | 0.863 | 1.488 | 0.026 | 1.208 | 0.354 | 1.431 | 0.019 |
| 1368400_at   | NM_053370 | translocase of inner mitochondrial membrane 8 homolog a (yeast)                                                                                  | Timm8a                             | 1.229 | 0.041 | 1.700 | 0.125 | 0.885 | 0.982 | 1.342 | 0.027 |
| 1390237_at   | BF558361  | translocase of inner mitochondrial membrane 8 homolog a (yeast)                                                                                  | Timm8a                             | 0.681 | 0.277 | 1.973 | 0.001 | 0.921 | 0.174 | 2.584 | 0.005 |
| 1367808_at   | NM_022541 | translocase of inner mitochondrial membrane 8 homolog b (yeast)                                                                                  | Timm8b                             | 0.597 | 0.355 | 0.777 | 0.056 | 0.567 | 0.003 | 0.709 | 0.050 |
| 1388136_at   | BF282660  | translocase of inner mitochondrial membrane 9 homolog (yeast)                                                                                    | Timm9                              | 0.361 | 0.032 | 0.800 | 0.306 | 0.257 | 0.004 | 0.797 | 0.159 |
| 1398870_at   | AI177295  | translocase of outer mitochondrial membrane 20 homolog (yeast)                                                                                   | Tom20                              | 0.735 | 0.077 | 1.162 | 0.050 | 0.673 | 0.009 | 1.011 | 0.181 |
| 1370785_s_at | D63411    | translocase of outer mitochondrial membrane 20 homolog (yeast)                                                                                   | Tom20                              | 0.571 | 0.273 | 1.061 | 0.559 | 0.536 | 0.027 | 0.926 | 0.517 |
| 1367473_at   | BI284237  | translocase of outer mitochondrial membrane 22 homolog (yeast)                                                                                   | Tom22                              | 0.608 | 0.292 | 0.784 | 0.022 | 0.891 | 0.647 | 0.876 | 0.029 |
| 1389471_at   | AI412736  | Translocase of outer mitochondrial membrane 34 (predicted)                                                                                       | Tom34_predicted                    | 0.513 | 0.406 | 0.586 | 0.017 | 0.748 | 0.158 | 0.665 | 0.007 |
| 1379186_at   | BF414701  | translocase of outer mitochondrial membrane 70 homolog A (yeast)                                                                                 | Tom70a                             | 0.716 | 0.197 | 2.233 | 0.001 | 0.640 | 0.033 | 2.120 | 0.001 |
| 1371695_at   | AI230732  | translocated promoter region                                                                                                                     | Tpr                                | 0.899 | 0.559 | 1.044 | 0.323 | 1.137 | 0.880 | 1.078 | 0.573 |
| 1382939_at   | BE118639  | translocated promoter region                                                                                                                     | Tpr                                | 0.939 | 0.882 | 1.461 | 0.100 | 0.849 | 0.529 | 1.204 | 0.067 |



|              |           |                                                                                                                              |                                     |        |       |        |       |        |       |       |       |
|--------------|-----------|------------------------------------------------------------------------------------------------------------------------------|-------------------------------------|--------|-------|--------|-------|--------|-------|-------|-------|
| 1394814_at   | BF398127  | translocated promoter region                                                                                                 | Tpr                                 | 0.927  | 0.896 | 1.553  | 0.211 | 0.724  | 0.352 | 1.056 | 0.793 |
| 1371688_at   | AI178493  | translocation associated membrane protein 1                                                                                  | Tram1                               | 0.454  | 0.101 | 0.373  | 0.000 | 0.594  | 0.044 | 0.477 | 0.001 |
| 1390077_at   | AA956421  | Translocation associated membrane protein 1                                                                                  | Tram1                               | 0.412  | 0.242 | 0.839  | 0.107 | 0.466  | 0.088 | 0.634 | 0.075 |
| 1374188_at   | AI103194  | translocation protein 1                                                                                                      | Tloc1                               | 0.730  | 0.019 | 0.604  | 0.051 | 0.684  | 0.003 | 0.596 | 0.092 |
| 1398970_at   | BI303004  | translocation protein 1                                                                                                      | Tloc1                               | 0.840  | 0.151 | 0.725  | 0.001 | 0.749  | 0.138 | 0.776 | 0.002 |
| 1370304_at   | AB006450  | translocator of inner mitochondrial membrane 17a /// similar to translocator of inner mitochondrial membrane 17a (predicted) | Timm17a ///<br>RGD1560665_predicted | 0.404  | 0.082 | 0.838  | 0.166 | 0.291  | 0.006 | 0.782 | 0.137 |
| 1372455_at   | AI410264  | transmembrane 4 superfamily member 12                                                                                        | Tm4sf12                             | 0.518  | 0.076 | 0.568  | 0.002 | 0.683  | 0.116 | 0.332 | 0.008 |
| 1377630_at   | AI408602  | transmembrane 4 superfamily member 13 /// similar to transmembrane 4 superfamily member 13                                   | Tm4sf13 /// LOC500643               | 0.831  | 0.078 | 0.762  | 0.005 | 0.781  | 0.048 | 0.608 | 0.015 |
| 1371702_at   | AI234044  | transmembrane 4 superfamily member 2 (mapped)                                                                                | Tm4sf2_mapped                       | 1.121  | 0.138 | 0.668  | 0.004 | 1.406  | 0.039 | 0.808 | 0.048 |
| 1368706_at   | NM_053785 | transmembrane 4 superfamily member 4                                                                                         | Tm4sf4                              | 0.411  | 0.003 | 0.263  | 0.000 | 0.383  | 0.001 | 0.269 | 0.016 |
| 1374151_at   | BI289940  | Transmembrane 6 superfamily member 1 (predicted)                                                                             | Tm6sf1_predicted                    | 1.237  | 0.696 | 0.827  | 0.382 | 0.558  | 0.069 | 0.800 | 0.182 |
| 1379482_at   | BI283829  | transmembrane 6 superfamily member 1 (predicted)                                                                             | Tm6sf1_predicted                    | 0.996  | 0.977 | 0.582  | 0.187 | 1.061  | 0.719 | 0.588 | 0.183 |
| 1389725_at   | BM390364  | transmembrane 7 superfamily member 2                                                                                         | Tm7sf2                              | 0.919  | 0.952 | 0.344  | 0.017 | 0.532  | 0.105 | 0.253 | 0.020 |
| 1389609_at   | BG378884  | transmembrane 7 superfamily member 3                                                                                         | Tm7sf3                              | 0.796  | 0.278 | 0.812  | 0.050 | 0.847  | 0.045 | 0.913 | 0.029 |
| 1390125_at   | BE098998  | transmembrane 9 superfamily member 1                                                                                         | Tm9sf1                              | 0.769  | 0.501 | 0.996  | 0.949 | 0.921  | 0.315 | 1.043 | 0.759 |
| 1367496_at   | AI179901  | transmembrane 9 superfamily member 2                                                                                         | Tm9sf2                              | 0.675  | 0.094 | 0.601  | 0.002 | 0.711  | 0.074 | 0.733 | 0.139 |
| 1396531_at   | BF416287  | Transmembrane 9 superfamily protein member 4                                                                                 | Tm9sf4                              | 1.016  | 0.131 | 1.186  | 0.408 | 1.002  | 0.998 | 1.001 | 0.959 |
| 1378075_at   | BI275978  | transmembrane 9 superfamily protein member 4                                                                                 | Tm9sf4                              | 0.673  | 0.564 | 0.958  | 0.707 | 0.740  | 0.251 | 0.784 | 0.131 |
| 1378052_at   | AW253907  | Transmembrane 9 superfamily protein member 4                                                                                 | Tm9sf4                              | 1.090  | 0.831 | 0.492  | 0.011 | 0.905  | 0.831 | 0.422 | 0.025 |
| 1373391_at   | BM390343  | transmembrane and coiled-coil domains 1                                                                                      | Tmco1                               | 0.568  | 0.333 | 0.812  | 0.166 | 0.615  | 0.078 | 0.937 | 0.037 |
| 1391134_at   | BF404933  | transmembrane and coiled-coil domains 3 (predicted)                                                                          | Tmco3_predicted                     | 0.524  | 0.050 | 0.411  | 0.005 | 0.519  | 0.069 | 0.445 | 0.007 |
| 1396212_at   | BE114358  | Transmembrane and tetratricopeptide repeat containing 2 (predicted)                                                          | Tmtc2_predicted                     | 0.846  | 0.620 | 0.414  | 0.021 | 1.192  | 0.856 | 0.754 | 0.162 |
| 1394937_at   | BE112859  | Transmembrane and tetratricopeptide repeat containing 2 (predicted)                                                          | Tmtc2_predicted                     | 1.011  | 0.974 | 1.083  | 0.848 | 0.776  | 0.443 | 0.995 | 0.559 |
| 1376102_at   | BI292351  | transmembrane BAX inhibitor motif containing 1                                                                               | Tmbim1                              | 15.425 | 0.007 | 20.507 | 0.002 | 4.685  | 0.014 | 5.317 | 0.003 |
| 1371968_at   | AI013781  | transmembrane BAX inhibitor motif containing 4                                                                               | Tmbim4                              | 3.283  | 0.008 | 3.081  | 0.004 | 3.475  | 0.000 | 4.420 | 0.014 |
| 1393845_a_at | AI556940  | transmembrane channel-like gene family 4                                                                                     | Tmc4                                | 1.719  | 0.010 | 0.788  | 0.267 | 2.597  | 0.018 | 1.837 | 0.036 |
| 1385714_at   | BF545988  | transmembrane channel-like gene family 4                                                                                     | Tmc4                                | 1.968  | 0.224 | 0.981  | 0.466 | 4.825  | 0.006 | 1.619 | 0.011 |
| 1385436_at   | AI556940  | transmembrane channel-like gene family 4                                                                                     | Tmc4                                | 1.770  | 0.476 | 0.998  | 0.759 | 3.242  | 0.018 | 1.523 | 0.014 |
| 1388628_at   | BI284430  | transmembrane emp24 domain containing 3                                                                                      | Tmed3                               | 0.532  | 0.423 | 0.599  | 0.025 | 0.530  | 0.050 | 0.595 | 0.004 |
| 1389940_at   | AI178934  | transmembrane emp24 domain trafficking protein 2                                                                             | Tmed2                               | 0.719  | 0.256 | 0.832  | 0.136 | 0.725  | 0.284 | 0.859 | 0.200 |
| 1398824_at   | NM_031722 | transmembrane emp24 domain trafficking protein 2                                                                             | Tmed2                               | 1.058  | 0.744 | 1.262  | 0.820 | 1.052  | 0.385 | 1.151 | 0.930 |
| 1373056_at   | AI409861  | transmembrane emp24 protein transport domain containing 4 (predicted)                                                        | Tmed4_predicted                     | 0.794  | 0.255 | 0.558  | 0.008 | 1.174  | 0.251 | 0.799 | 0.020 |
| 1376161_at   | AI235294  | transmembrane emp24 protein transport domain containing 4 (predicted)                                                        | Tmed4_predicted                     | 0.926  | 0.735 | 1.002  | 0.993 | 0.857  | 0.931 | 1.184 | 0.161 |
| 1375904_at   | AI011285  | Transmembrane emp24 protein transport domain containing 5                                                                    | Tmed5                               | 0.962  | 0.458 | 1.596  | 0.024 | 1.502  | 0.019 | 1.743 | 0.009 |
| 1398553_at   | AI137113  | transmembrane emp24 protein transport domain containing 5                                                                    | Tmed5                               | 1.001  | 0.732 | 0.996  | 0.663 | 1.196  | 0.336 | 1.305 | 0.433 |
| 1379429_at   | AI045807  | Transmembrane emp24 protein transport domain containing 5                                                                    | Tmed5                               | 0.709  | 0.742 | 1.369  | 0.879 | 1.786  | 0.193 | 1.339 | 0.061 |
| 1388369_at   | BM385547  | transmembrane emp24 protein transport domain containing 9                                                                    | Tmed9                               | 0.905  | 0.165 | 1.556  | 0.004 | 0.834  | 0.967 | 1.371 | 0.030 |
| 1384388_at   | H34273    | transmembrane emp24 protein transport domain containing 9                                                                    | Tmed9                               | 0.695  | 0.823 | 1.479  | 0.018 | 0.672  | 0.604 | 1.223 | 0.131 |
| 1398796_at   | NM_053467 | transmembrane emp24-like trafficking protein 10 (yeast)                                                                      | Tmed10                              | 0.804  | 0.350 | 1.349  | 0.007 | 0.897  | 0.025 | 1.168 | 0.034 |
| 1373329_at   | AI412136  | transmembrane protease, serine 2                                                                                             | Tmprss2                             | 0.491  | 0.022 | 0.671  | 0.225 | 0.866  | 0.068 | 0.504 | 0.086 |
| 1378952_at   | H31535    | transmembrane protein 101                                                                                                    | Tmem101                             | 0.677  | 0.481 | 0.656  | 0.013 | 0.646  | 0.071 | 0.445 | 0.001 |
| 1372689_at   | BG381479  | transmembrane protein 103 (predicted)                                                                                        | Tmem103_predicted                   | 0.424  | 0.088 | 1.204  | 0.479 | 0.425  | 0.018 | 1.018 | 0.938 |
| 1374948_at   | BI275815  | transmembrane protein 106A                                                                                                   | Tmem106a                            | 8.079  | 0.010 | 6.024  | 0.001 | 14.117 | 0.000 | 6.508 | 0.000 |
| 1383731_at   | AA818065  | Transmembrane protein 106B                                                                                                   | Tmem106b                            | 0.274  | 0.036 | 0.382  | 0.007 | 0.493  | 0.121 | 0.504 | 0.037 |
| 1392486_at   | AW433977  | transmembrane protein 106B                                                                                                   | Tmem106b                            | 0.536  | 0.147 | 1.158  | 0.031 | 0.261  | 0.050 | 1.365 | 0.014 |
| 1395920_at   | AI547931  | transmembrane protein 106B                                                                                                   | Tmem106b                            | 0.993  | 0.956 | 1.021  | 0.485 | 0.929  | 0.971 | 1.066 | 0.982 |
| 1372657_at   | BM391494  | transmembrane protein 106C                                                                                                   | Tmem106c                            | 0.488  | 0.044 | 0.190  | 0.000 | 0.300  | 0.034 | 0.197 | 0.019 |
| 1372369_at   | AI172075  | transmembrane protein 109                                                                                                    | Tmem109                             | 0.737  | 0.860 | 1.711  | 0.030 | 0.745  | 0.465 | 1.682 | 0.123 |
| 1372591_at   | AI410700  | transmembrane protein 11 (predicted)                                                                                         | Tmem11_predicted                    | 0.768  | 0.474 | 1.649  | 0.043 | 0.635  | 0.035 | 1.328 | 0.001 |
| 1371865_at   | BI283821  | transmembrane protein 111                                                                                                    | Tmem111                             | 0.743  | 0.970 | 1.319  | 0.002 | 1.000  | 1.000 | 1.090 | 0.417 |
| 1372894_at   | BI284179  | transmembrane protein 115 (predicted)                                                                                        | Tmem115_predicted                   | 0.504  | 0.178 | 1.080  | 0.504 | 0.328  | 0.033 | 1.071 | 0.588 |
| 1388930_at   | AI171651  | transmembrane protein 123                                                                                                    | Tmem123                             | 0.477  | 0.014 | 0.351  | 0.000 | 1.100  | 0.525 | 0.529 | 0.003 |
| 1378243_at   | AA923937  | transmembrane protein 17                                                                                                     | Tmem17                              | 2.399  | 0.131 | 5.010  | 0.002 | 0.927  | 0.758 | 2.067 | 0.017 |
| 1382065_at   | BM388726  | Transmembrane protein 18                                                                                                     | Tmem18                              | 1.016  | 0.946 | 0.648  | 0.009 | 0.848  | 0.261 | 0.787 | 0.005 |
| 1394842_at   | BF289172  | transmembrane protein 19                                                                                                     | Tmem19                              | 2.700  | 0.005 | 1.427  | 0.003 | 3.442  | 0.001 | 2.119 | 0.001 |
| 1386346_at   | BI275715  | transmembrane protein 19                                                                                                     | Tmem19                              | 1.647  | 0.076 | 1.133  | 0.083 | 2.409  | 0.004 | 1.870 | 0.003 |
| 1383262_at   | BG378159  | Transmembrane protein 19                                                                                                     | Tmem19                              | 0.970  | 0.646 | 0.884  | 0.070 | 1.093  | 0.777 | 0.811 | 0.242 |
| 1392045_at   | BE110277  | transmembrane protein 22                                                                                                     | Tmem22                              | 0.596  | 0.136 | 0.435  | 0.002 | 0.463  | 0.045 | 0.458 | 0.018 |
| 1384106_at   | AW141276  | transmembrane protein 23                                                                                                     | Tmem23                              | 6.489  | 0.064 | 5.634  | 0.000 | 9.096  | 0.000 | 8.594 | 0.010 |
| 1380566_at   | BI279622  | transmembrane protein 24                                                                                                     | Tmem24                              | 0.838  | 0.037 | 0.742  | 0.195 | 0.951  | 0.036 | 0.940 | 0.995 |

|              |           |                                                                                                                                                                      |                    |         |       |         |       |         |       |         |       |
|--------------|-----------|----------------------------------------------------------------------------------------------------------------------------------------------------------------------|--------------------|---------|-------|---------|-------|---------|-------|---------|-------|
| 1390854_at   | BG378195  | transmembrane protein 24                                                                                                                                             | Tmem24             | 0.543   | 0.602 | 0.591   | 0.060 | 0.854   | 0.440 | 0.564   | 0.044 |
| 1377812_a_at | BG378195  | transmembrane protein 24                                                                                                                                             | Tmem24             | 0.861   | 0.621 | 0.662   | 0.009 | 0.999   | 0.196 | 0.842   | 0.036 |
| 1387013_at   | NM_020976 | transmembrane protein 27                                                                                                                                             | Tmem27             | 0.696   | 0.559 | 0.280   | 0.002 | 0.700   | 0.110 | 0.458   | 0.004 |
| 1373058_at   | AI409051  | transmembrane protein 30A                                                                                                                                            | Tmem30a            | 0.538   | 0.391 | 0.463   | 0.000 | 0.625   | 0.057 | 0.569   | 0.003 |
| 1394992_at   | BF389891  | Transmembrane protein 33                                                                                                                                             | Tmem33             | 1.055   | 0.773 | 1.001   | 0.960 | 1.083   | 0.600 | 1.015   | 0.811 |
| 1369076_at   | NM_021671 | transmembrane protein 33                                                                                                                                             | Tmem33             | 0.853   | 0.876 | 1.295   | 0.568 | 0.725   | 0.259 | 0.934   | 0.426 |
| 1380438_at   | BF390276  | Transmembrane protein 33                                                                                                                                             | Tmem33             | 0.855   | 0.934 | 0.620   | 0.050 | 0.999   | 0.976 | 0.523   | 0.039 |
| 1399082_at   | AI176581  | Transmembrane protein 33                                                                                                                                             | Tmem33             | 1.027   | 0.953 | 1.123   | 0.911 | 0.904   | 0.511 | 1.109   | 0.666 |
| 1379419_at   | AA962979  | transmembrane protein 34                                                                                                                                             | Tmem34             | 0.266   | 0.005 | 0.310   | 0.000 | 0.449   | 0.108 | 0.508   | 0.044 |
| 1397227_at   | BE120895  | transmembrane protein 35                                                                                                                                             | Tmem35             | 0.472   | 0.005 | 0.247   | 0.016 | 0.712   | 0.033 | 0.369   | 0.049 |
| 1389171_at   | AI104326  | transmembrane protein 38a (predicted)                                                                                                                                | Tmem38a_predicted  | 0.253   | 0.002 | 0.114   | 0.001 | 0.119   | 0.000 | 0.116   | 0.014 |
| 1374484_at   | AI230318  | transmembrane protein 39a                                                                                                                                            | Tmem39a            | 0.712   | 0.791 | 1.812   | 0.007 | 0.628   | 0.035 | 1.249   | 0.099 |
| 1399092_at   | BG378899  | transmembrane protein 39b                                                                                                                                            | Tmem39b            | 0.848   | 0.683 | 1.332   | 0.047 | 1.003   | 0.993 | 0.798   | 0.308 |
| 1376571_at   | BI285997  | transmembrane protein 42 (predicted)                                                                                                                                 | Tmem42_predicted   | 0.942   | 0.651 | 0.588   | 0.018 | 0.659   | 0.233 | 0.870   | 0.275 |
| 1373595_at   | BM385463  | transmembrane protein 43                                                                                                                                             | Tmem43             | 1.557   | 0.055 | 2.038   | 0.004 | 1.999   | 0.039 | 1.962   | 0.001 |
| 1370807_at   | AF411216  | transmembrane protein 49                                                                                                                                             | Tmem49             | 1.670   | 0.550 | 2.629   | 0.002 | 2.035   | 0.548 | 2.641   | 0.004 |
| 1395443_at   | BF396088  | Transmembrane protein 49                                                                                                                                             | Tmem49             | 0.984   | 0.944 | 0.966   | 0.053 | 1.003   | 0.947 | 1.586   | 0.139 |
| 1376450_at   | BG375242  | transmembrane protein 5                                                                                                                                              | Tmem5              | 0.574   | 0.034 | 1.315   | 0.371 | 0.337   | 0.039 | 0.832   | 0.994 |
| 1372100_at   | BI283746  | transmembrane protein 50A (predicted)                                                                                                                                | Tmem50a_predicted  | 1.586   | 0.157 | 1.197   | 0.148 | 1.552   | 0.017 | 1.734   | 0.011 |
| 1397345_at   | AI011553  | Transmembrane protein 50A (predicted)                                                                                                                                | Tmem50a_predicted  | 0.986   | 0.973 | 1.223   | 0.343 | 1.062   | 0.867 | 0.993   | 0.088 |
| 1371347_at   | BI279371  | transmembrane protein 50B                                                                                                                                            | Tmem50b            | 1.073   | 0.609 | 0.260   | 0.002 | 1.213   | 0.229 | 0.277   | 0.001 |
| 1372780_at   | BM391310  | transmembrane protein 53 (predicted)                                                                                                                                 | Tmem53_predicted   | 0.722   | 0.023 | 0.221   | 0.004 | 1.011   | 0.523 | 0.324   | 0.014 |
| 1383375_at   | BI293584  | transmembrane protein 55A                                                                                                                                            | Tmem55a            | 0.468   | 0.113 | 1.613   | 0.000 | 0.424   | 0.002 | 1.926   | 0.000 |
| 1386632_at   | BF547901  | transmembrane protein 55A                                                                                                                                            | Tmem55a            | 0.604   | 0.232 | 1.626   | 0.008 | 0.406   | 0.026 | 1.827   | 0.000 |
| 1392697_at   | AI230361  | Transmembrane protein 55A                                                                                                                                            | Tmem55a            | 1.128   | 0.754 | 2.635   | 0.070 | 0.785   | 0.542 | 2.813   | 0.019 |
| 1373486_at   | BG375421  | transmembrane protein 58 (predicted)                                                                                                                                 | Tmem58_predicted   | 1.000   | 0.994 | 1.504   | 0.141 | 1.963   | 0.098 | 1.257   | 0.311 |
| 1379595_at   | AI171745  | transmembrane protein 60 (predicted)                                                                                                                                 | Tmem60_predicted   | 0.692   | 0.424 | 0.688   | 0.040 | 0.256   | 0.034 | 0.752   | 0.069 |
| 1390330_at   | AI236259  | Transmembrane protein 60 (predicted)                                                                                                                                 | Tmem60_predicted   | 0.918   | 0.970 | 0.889   | 0.084 | 1.133   | 0.054 | 0.876   | 0.026 |
| 1377102_at   | BI288335  | transmembrane protein 63a (predicted)                                                                                                                                | Tmem63a_predicted  | 1.099   | 0.104 | 0.580   | 0.024 | 0.960   | 0.568 | 0.603   | 0.018 |
| 1398879_at   | BE329031  | transmembrane protein 66                                                                                                                                             | Tmem66             | 0.899   | 0.219 | 1.306   | 0.014 | 0.821   | 0.047 | 1.290   | 0.040 |
| 1390893_at   | BF284878  | transmembrane protein 69                                                                                                                                             | Tmem69             | 0.777   | 0.814 | 0.945   | 0.883 | 0.439   | 0.044 | 1.175   | 0.153 |
| 1382371_at   | AI172475  | transmembrane protein 77                                                                                                                                             | Tmem77             | 1.312   | 0.109 | 1.016   | 0.897 | 1.027   | 0.270 | 0.995   | 0.936 |
| 1374518_at   | AA818113  | transmembrane protein 77                                                                                                                                             | Tmem77             | 1.027   | 0.116 | 1.327   | 0.441 | 1.253   | 0.120 | 1.120   | 0.479 |
| 1390292_at   | AW527467  | transmembrane protein 8 (five membrane-spanning domains) (predicted)                                                                                                 | Tmem8_predicted    | 0.874   | 0.375 | 0.477   | 0.019 | 0.698   | 0.397 | 0.629   | 0.053 |
| 1372139_at   | BI289656  | transmembrane protein 80                                                                                                                                             | Tmem80             | 0.689   | 0.068 | 0.285   | 0.040 | 0.739   | 0.041 | 0.616   | 0.042 |
| 1371454_at   | BI285673  | transmembrane protein 93 (predicted)                                                                                                                                 | Tmem93_predicted   | 0.658   | 0.072 | 1.664   | 0.013 | 0.613   | 0.005 | 1.391   | 0.026 |
| 1372156_at   | BF414018  | transmembrane protein 97                                                                                                                                             | Tmem97             | 0.445   | 0.728 | 1.326   | 0.013 | 0.710   | 0.517 | 1.089   | 0.255 |
| 1396086_at   | H31931    | transmembrane protein 97                                                                                                                                             | Tmem97             | 0.646   | 0.802 | 0.890   | 0.916 | 0.418   | 0.127 | 0.792   | 0.277 |
| 1373161_at   | BM386009  | transmembrane protein 98                                                                                                                                             | Tmem98             | 0.329   | 0.084 | 0.236   | 0.002 | 0.470   | 0.009 | 0.279   | 0.004 |
| 1392534_at   | BI274101  | transmembrane, prostate androgen induced RNA (predicted)                                                                                                             | Tmepai_predicted   | 0.971   | 0.906 | 1.082   | 0.983 | 1.046   | 0.789 | 0.986   | 0.924 |
| 1388149_at   | X57523    | transporter 1, ATP-binding cassette, sub-family B (MDR/TAP)                                                                                                          | Tap1               | 201.494 | 0.001 | 130.820 | 0.000 | 217.327 | 0.000 | 158.146 | 0.000 |
| 1368732_at   | NM_032056 | transporter 2, ATP-binding cassette, sub-family B (MDR/TAP)                                                                                                          | Tap2               | 60.684  | 0.001 | 45.620  | 0.002 | 70.000  | 0.000 | 38.298  | 0.003 |
| 1381364_at   | BE116070  | transportin 1                                                                                                                                                        | Tnpo1              | 1.028   | 0.802 | 1.194   | 0.156 | 1.032   | 0.202 | 1.277   | 0.061 |
| 1394440_at   | BI293863  | transportin 1                                                                                                                                                        | Tnpo1              | 1.332   | 0.900 | 1.170   | 0.098 | 1.162   | 0.858 | 0.751   | 0.271 |
| 1389979_at   | BI274235  | transportin 3                                                                                                                                                        | Tnpo3              | 0.985   | 0.860 | 1.063   | 0.598 | 1.255   | 0.115 | 1.006   | 0.932 |
| 1380596_at   | BE098869  | Transthyretin                                                                                                                                                        | Ttr                | 0.824   | 0.304 | 0.994   | 0.489 | 0.967   | 0.208 | 1.291   | 0.262 |
| 1389537_at   | AI502399  | Treacher Collins Franceschetti syndrome 1, homolog (predicted)                                                                                                       | Tcof1_predicted    | 1.001   | 0.981 | 1.626   | 0.036 | 1.004   | 0.356 | 1.234   | 0.056 |
| 1387218_at   | NM_013042 | trefoil factor 3                                                                                                                                                     | Tff3               | 0.776   | 0.005 | 0.473   | 0.064 | 0.399   | 0.014 | 0.716   | 0.512 |
| 1372451_at   | AI598346  | Trf (TATA binding protein-related factor)-proximal protein homolog (Drosophila) /// similar to Ubiquitin specific protease homolog 49 (TRF-proximal protein homolog) | Trfp /// LOC501098 | 0.602   | 0.457 | 0.567   | 0.068 | 0.569   | 0.185 | 0.647   | 0.046 |
| 1371138_at   | AJ243303  | triadin                                                                                                                                                              | Trdn               | 1.340   | 0.231 | 0.978   | 0.979 | 0.791   | 0.998 | 1.043   | 0.999 |
| 1371019_at   | BM387324  | tribbles homolog 1 (Drosophila)                                                                                                                                      | Trib1              | 0.963   | 0.795 | 0.897   | 0.311 | 0.963   | 0.829 | 0.848   | 0.280 |
| 1386321_s_at | H31287    | tribbles homolog 3 (Drosophila)                                                                                                                                      | Trib3              | 2.123   | 0.053 | 14.661  | 0.000 | 1.301   | 0.140 | 10.473  | 0.001 |
| 1370694_at   | AB020967  | tribbles homolog 3 (Drosophila)                                                                                                                                      | Trib3              | 1.940   | 0.062 | 9.759   | 0.000 | 1.162   | 0.892 | 7.805   | 0.001 |
| 1370695_s_at | AB020967  | tribbles homolog 3 (Drosophila)                                                                                                                                      | Trib3              | 1.877   | 0.151 | 8.150   | 0.003 | 0.878   | 0.120 | 7.744   | 0.003 |
| 1376802_at   | AW915558  | Trichoplein, keratin filament binding (predicted)                                                                                                                    | Tchp_predicted     | 0.689   | 0.158 | 1.131   | 0.992 | 0.653   | 0.132 | 0.994   | 0.948 |
| 1377798_at   | AW915594  | trichoplein, keratin filament binding (predicted)                                                                                                                    | Tchp_predicted     | 0.981   | 0.299 | 1.022   | 0.966 | 0.821   | 0.537 | 0.992   | 0.896 |
| 1385227_at   | BF398245  | trichorhinophalangeal syndrome I (predicted)                                                                                                                         | Trps1_predicted    | 1.003   | 0.834 | 0.989   | 0.488 | 1.013   | 0.962 | 0.976   | 0.061 |
| 1375664_at   | BI294732  | Trinucleotide repeat containing 6 (predicted)                                                                                                                        | Tnrc6_predicted    | 1.392   | 0.031 | 1.109   | 0.807 | 1.582   | 0.007 | 1.028   | 0.204 |
| 1397608_at   | BE107197  | Trinucleotide repeat containing 6 (predicted)                                                                                                                        | Tnrc6_predicted    | 1.061   | 0.858 | 0.847   | 0.247 | 1.118   | 0.831 | 1.065   | 0.705 |
| 1382579_at   | BE107165  | trinucleotide repeat containing 9 (predicted)                                                                                                                        | Tnrc9_predicted    | 2.732   | 0.001 | 1.536   | 0.005 | 1.034   | 0.344 | 1.242   | 0.023 |

|              |           |                                                                   |                  |        |       |       |       |        |       |       |       |
|--------------|-----------|-------------------------------------------------------------------|------------------|--------|-------|-------|-------|--------|-------|-------|-------|
| 1379751_at   | BF554367  | trinucleotide repeat containing 9 (predicted)                     | Tnrc9_predicted  | 2.480  | 0.066 | 1.115 | 0.282 | 0.949  | 0.130 | 1.061 | 0.947 |
| 1377582_at   | BE095938  | Trinucleotide repeat containing 9 (predicted)                     | Tnrc9_predicted  | 2.749  | 0.149 | 1.615 | 0.054 | 0.758  | 0.492 | 1.358 | 0.087 |
| 1380650_at   | AA892317  | TRIO and F-actin binding protein                                  | Triobp           | 4.070  | 0.027 | 1.390 | 0.409 | 2.560  | 0.041 | 2.829 | 0.234 |
| 1367603_at   | NM_022922 | triosephosphate isomerase 1                                       | Tpi1             | 0.509  | 0.247 | 1.628 | 0.081 | 0.370  | 0.018 | 1.560 | 0.098 |
| 1373550_at   | BI280318  | Tripartite motif protein 11 (predicted)                           | Trim11_predicted | 0.699  | 0.008 | 0.678 | 0.177 | 0.531  | 0.001 | 0.990 | 0.140 |
| 1377726_at   | BI293740  | tripartite motif protein 25 (mapped)                              | Trim25_mapped    | 6.233  | 0.039 | 1.964 | 0.025 | 7.725  | 0.001 | 2.479 | 0.084 |
| 1383369_at   | AI028875  | tripartite motif protein 26                                       | Trim26           | 3.592  | 0.008 | 8.916 | 0.000 | 3.071  | 0.020 | 8.603 | 0.002 |
| 1378293_at   | AI556246  | tripartite motif protein 26                                       | Trim26           | 4.892  | 0.093 | 4.732 | 0.002 | 3.899  | 0.000 | 2.635 | 0.018 |
| 1377234_at   | BI294862  | Tripartite motif protein 27 (predicted)                           | Trim27_predicted | 0.684  | 0.054 | 1.746 | 0.156 | 0.593  | 0.028 | 1.846 | 0.163 |
| 1371737_at   | BI281720  | tripartite motif protein 27 (predicted)                           | Trim27_predicted | 0.798  | 0.121 | 1.531 | 0.030 | 0.692  | 0.005 | 1.323 | 0.021 |
| 1395822_at   | BE098563  | tripartite motif protein 28                                       | Trim28           | 0.920  | 0.118 | 1.212 | 0.044 | 1.067  | 0.708 | 0.844 | 0.243 |
| 1372155_at   | BI283697  | tripartite motif protein 28                                       | Trim28           | 0.790  | 0.194 | 1.541 | 0.020 | 0.739  | 0.027 | 1.241 | 0.037 |
| 1389163_at   | BG372673  | tripartite motif protein 32                                       | Trim32           | 0.670  | 0.840 | 0.339 | 0.001 | 0.449  | 0.019 | 0.619 | 0.014 |
| 1379927_at   | AI113197  | Tripartite motif protein 33 (predicted)                           | Trim33_predicted | 0.993  | 0.963 | 0.907 | 0.320 | 0.913  | 0.796 | 0.984 | 0.366 |
| 1385252_at   | BI280655  | Tripartite motif protein 34 (predicted)                           | Trim34_predicted | 13.794 | 0.005 | 3.656 | 0.012 | 26.340 | 0.000 | 7.853 | 0.002 |
| 1371786_at   | BE111791  | tripartite motif protein 35                                       | Trim35           | 0.470  | 0.003 | 0.314 | 0.002 | 0.462  | 0.000 | 0.363 | 0.002 |
| 1373398_at   | BI275184  | Tripartite motif protein 37 (predicted)                           | Trim37_predicted | 0.491  | 0.003 | 1.128 | 0.228 | 0.506  | 0.005 | 1.133 | 0.341 |
| 1385335_at   | BF415953  | tripartite motif protein 39                                       | Trim39           | 0.909  | 0.052 | 1.002 | 0.735 | 0.837  | 0.261 | 0.869 | 0.462 |
| 1397222_at   | AW528473  | Tripartite motif protein 39                                       | Trim39           | 1.316  | 0.123 | 2.000 | 0.113 | 1.109  | 0.553 | 0.922 | 0.592 |
| 1373395_at   | AI044721  | tripartite motif protein 41 (predicted)                           | Trim41_predicted | 0.692  | 0.017 | 0.764 | 0.013 | 0.883  | 0.150 | 0.804 | 0.161 |
| 1390973_at   | BI294747  | tripartite motif protein 45 (predicted)                           | Trim45_predicted | 3.127  | 0.289 | 0.695 | 0.808 | 3.074  | 0.027 | 1.313 | 0.193 |
| 1373031_at   | BI275757  | tripartite motif protein 8 (predicted)                            | Trim8_predicted  | 1.150  | 0.376 | 0.858 | 0.446 | 1.032  | 0.198 | 0.777 | 0.143 |
| 1368215_at   | NM_031357 | tripeptidyl peptidase I                                           | Tpp1             | 0.811  | 0.488 | 1.185 | 0.006 | 0.700  | 0.072 | 1.185 | 0.034 |
| 1367976_at   | NM_031137 | tripeptidyl peptidase II                                          | Tpp2             | 0.815  | 0.033 | 0.616 | 0.003 | 0.877  | 0.157 | 0.760 | 0.047 |
| 1374464_at   | BI287875  | Trk-fused gene                                                    | Tfg              | 0.851  | 0.411 | 1.131 | 0.179 | 0.798  | 0.039 | 1.075 | 0.361 |
| 1389056_at   | BF394168  | TRM1 tRNA methyltransferase 1 homolog (S. cerevisiae)             | Trmt1            | 0.914  | 0.482 | 1.911 | 0.001 | 0.828  | 0.783 | 1.557 | 0.045 |
| 1399120_at   | BF407592  | TRM5 tRNA methyltransferase 5 homolog (S. cerevisiae) (predicted) | Trmt5_predicted  | 0.680  | 0.144 | 0.534 | 0.010 | 0.719  | 0.129 | 0.594 | 0.034 |
| 1374133_at   | BG373110  | tRNA isopentenyltransferase 1 (predicted)                         | Trit1_predicted  | 1.487  | 0.273 | 2.144 | 0.001 | 1.317  | 0.976 | 2.233 | 0.003 |
| 1385296_at   | AA963783  | tRNA methyltransferase 12 homolog (S. cerevisiae)                 | Trmt12           | 0.418  | 0.037 | 0.914 | 0.497 | 0.400  | 0.044 | 0.785 | 0.217 |
| 1383144_at   | AI454550  | tRNA nucleotidyl transferase, CCA-adding, 1                       | Trnt1            | 0.639  | 0.024 | 0.840 | 0.105 | 0.676  | 0.014 | 0.866 | 0.150 |
| 1384879_at   | AI045958  | tRNA phosphotransferase 1 (predicted)                             | Trpt1_predicted  | 0.932  | 0.732 | 0.968 | 0.717 | 1.120  | 0.649 | 1.307 | 0.149 |
| 1369975_at   | NM_023027 | tRNA selenocysteine associated protein                            | Secp43           | 0.555  | 0.474 | 1.124 | 0.127 | 1.023  | 0.908 | 1.265 | 0.131 |
| 1383430_at   | BF414509  | tRNA splicing endonuclease 2 homolog (S. cerevisiae)              | Tsen2            | 0.487  | 0.002 | 0.760 | 0.306 | 0.362  | 0.013 | 0.706 | 0.134 |
| 1397270_at   | AI502769  | TRNA splicing endonuclease 2 homolog (S. cerevisiae)              | Tsen2            | 0.456  | 0.071 | 1.387 | 0.116 | 0.984  | 0.410 | 1.248 | 0.931 |
| 1371612_at   | AI177656  | tRNA splicing endonuclease 34 homolog                             | TSEN34           | 0.757  | 0.041 | 0.848 | 0.048 | 0.820  | 0.038 | 0.818 | 0.040 |
| 1395568_at   | BF398797  | TRNA splicing endonuclease 34 homolog                             | TSEN34           | 1.137  | 0.416 | 0.828 | 0.909 | 1.248  | 0.630 | 1.032 | 0.845 |
| 1368540_at   | NM_031807 | trophoblast glycoprotein                                          | Tpbg             | 14.726 | 0.005 | 3.571 | 0.004 | 1.776  | 0.592 | 2.076 | 0.020 |
| 1388718_at   | AI104913  | tropomodulin 1                                                    | Tmod1            | 0.770  | 0.175 | 1.585 | 0.062 | 0.564  | 0.002 | 1.513 | 0.059 |
| 1390482_at   | BF285511  | Tropomodulin 2                                                    | Tmod2            | 0.564  | 0.056 | 1.473 | 0.024 | 0.598  | 0.025 | 0.830 | 0.501 |
| 1393418_at   | BF567833  | tropomodulin 2                                                    | Tmod2            | 0.571  | 0.487 | 0.622 | 0.981 | 0.363  | 0.022 | 0.517 | 0.251 |
| 1396504_at   | BE120185  | Tropomodulin 2                                                    | Tmod2            | 2.604  | 0.898 | 0.921 | 0.736 | 1.485  | 0.995 | 0.651 | 0.095 |
| 1369541_at   | NM_031613 | tropomodulin 2                                                    | Tmod2            | 0.990  | 0.957 | 0.575 | 0.051 | 0.425  | 0.047 | 0.525 | 0.053 |
| 1372500_at   | BG378269  | tropomodulin 3                                                    | Tmod3            | 1.499  | 0.072 | 2.280 | 0.002 | 1.712  | 0.004 | 1.939 | 0.016 |
| 1370288_a_at | AF372216  | tropomyosin 1, alpha                                              | Tpm1             | 2.149  | 0.001 | 3.070 | 0.046 | 1.158  | 0.337 | 1.057 | 0.999 |
| 1395794_at   | BF395218  | tropomyosin 1, alpha                                              | Tpm1             | 2.041  | 0.016 | 4.394 | 0.004 | 1.931  | 0.082 | 1.718 | 0.127 |
| 1370287_a_at | M23764    | tropomyosin 1, alpha                                              | Tpm1             | 2.319  | 0.019 | 1.677 | 0.004 | 1.142  | 0.518 | 1.038 | 0.153 |
| 1390471_at   | BM383411  | Tropomyosin 1, alpha                                              | Tpm1             | 2.397  | 0.099 | 1.495 | 0.187 | 3.256  | 0.044 | 0.945 | 0.987 |
| 1370513_at   | M34135    | tropomyosin 1, alpha                                              | Tpm1             | 1.305  | 0.185 | 1.115 | 0.774 | 0.639  | 0.041 | 0.987 | 0.693 |
| 1368724_a_at | NM_019131 | tropomyosin 1, alpha                                              | Tpm1             | 1.507  | 0.218 | 1.567 | 0.123 | 0.884  | 0.167 | 0.883 | 0.527 |
| 1395350_at   | AW919190  | Tropomyosin 1, alpha                                              | Tpm1             | 1.005  | 0.621 | 2.068 | 0.187 | 1.006  | 0.878 | 0.992 | 0.671 |
| 1391841_at   | BE103537  | Tropomyosin 1, alpha                                              | Tpm1             | 1.048  | 0.820 | 1.111 | 0.777 | 1.645  | 0.126 | 0.796 | 0.797 |
| 1379936_at   | AA875132  | Tropomyosin 1, alpha                                              | Tpm1             | 1.000  | 0.994 | 1.111 | 0.599 | 1.443  | 0.094 | 1.015 | 0.882 |
| 1383986_at   | AI071098  | tropomyosin 3, gamma                                              | Tpm3             | 1.552  | 0.019 | 2.234 | 0.003 | 1.901  | 0.018 | 2.032 | 0.002 |
| 1371239_s_at | AF053361  | tropomyosin 3, gamma                                              | Tpm3             | 1.160  | 0.092 | 1.750 | 0.246 | 1.191  | 0.139 | 1.267 | 0.271 |
| 1370339_at   | L24775    | tropomyosin 3, gamma                                              | Tpm3             | 1.239  | 0.102 | 2.007 | 0.000 | 1.576  | 0.025 | 2.422 | 0.007 |
| 1370340_x_at | BI295970  | tropomyosin 3, gamma                                              | Tpm3             | 1.008  | 0.411 | 1.262 | 0.072 | 1.052  | 0.221 | 1.188 | 0.047 |
| 1388268_at   | AF053361  | tropomyosin 3, gamma                                              | Tpm3             | 0.723  | 0.443 | 1.033 | 0.763 | 0.771  | 0.071 | 0.844 | 0.776 |
| 1389846_at   | BE104273  | Tropomyosin 3, gamma                                              | Tpm3             | 1.247  | 0.529 | 1.631 | 0.011 | 1.261  | 0.055 | 2.087 | 0.011 |
| 1387617_at   | NM_057208 | tropomyosin 3, gamma                                              | Tpm3             | 0.967  | 0.705 | 0.811 | 0.287 | 0.977  | 0.343 | 0.784 | 0.478 |
| 1368838_at   | NM_012678 | tropomyosin 4                                                     | Tpm4             | 2.034  | 0.189 | 2.331 | 0.242 | 1.312  | 0.962 | 0.880 | 0.236 |
| 1371354_at   | AI710682  | troponin C type 1 (slow)                                          | Tnnc1            | 0.997  | 0.897 | 0.962 | 0.043 | 1.004  | 0.876 | 0.961 | 0.130 |

|              |           |                                                                                                          |                                             |         |       |        |       |         |       |        |       |
|--------------|-----------|----------------------------------------------------------------------------------------------------------|---------------------------------------------|---------|-------|--------|-------|---------|-------|--------|-------|
| 1392496_at   | AI178581  | Trypsin V-A                                                                                              | LOC312273                                   | 1.150   | 0.456 | 0.093  | 0.007 | 1.043   | 0.829 | 0.162  | 0.062 |
| 1392647_at   | BF282318  | Tryptophan hydroxylase 1                                                                                 | Tph1                                        | 4.904   | 0.010 | 5.874  | 0.003 | 2.533   | 0.079 | 2.801  | 0.009 |
| 1389222_at   | BI282847  | Tryptophan hydroxylase 1                                                                                 | Tph1                                        | 1.919   | 0.059 | 1.437  | 0.049 | 1.474   | 0.152 | 1.504  | 0.005 |
| 1373034_at   | AI177128  | tryptophan rich basic protein                                                                            | Wrb                                         | 0.464   | 0.040 | 0.727  | 0.063 | 0.398   | 0.001 | 0.582  | 0.087 |
| 1379959_at   | BI280216  | tryptophan rich basic protein                                                                            | Wrb                                         | 0.412   | 0.093 | 1.921  | 0.061 | 0.195   | 0.001 | 1.216  | 0.314 |
| 1388574_at   | BG670966  | tryptophanyl-tRNA synthetase                                                                             | Wars                                        | 4.076   | 0.002 | 4.106  | 0.000 | 4.750   | 0.001 | 6.148  | 0.008 |
| 1395124_at   | BE101688  | tryptophanyl-tRNA synthetase                                                                             | Wars                                        | 15.251  | 0.018 | 7.196  | 0.011 | 14.346  | 0.001 | 5.566  | 0.004 |
| 1367771_at   | NM_031345 | TSC22 domain family 3                                                                                    | Tsc22d3                                     | 0.715   | 0.210 | 0.585  | 0.085 | 0.626   | 0.265 | 0.455  | 0.047 |
| 1390097_at   | BI281738  | TSPY-like 4                                                                                              | Tspsy4                                      | 0.349   | 0.032 | 0.189  | 0.000 | 0.342   | 0.025 | 0.235  | 0.002 |
| 1371962_at   | AI412102  | Tu translation elongation factor, mitochondrial (predicted)                                              | Tufm_predicted                              | 0.564   | 0.247 | 1.001  | 0.994 | 0.352   | 0.003 | 1.149  | 0.431 |
| 1369362_at   | NM_021854 | tuberous sclerosis 1                                                                                     | Tsc1                                        | 1.002   | 0.958 | 2.512  | 0.043 | 0.995   | 0.810 | 1.125  | 0.169 |
| 1368056_at   | U24150    | tuberous sclerosis 2                                                                                     | Tsc2                                        | 0.763   | 0.300 | 1.211  | 0.105 | 1.011   | 0.710 | 1.180  | 0.232 |
| 1373408_at   | BI282062  | tubulin cofactor a                                                                                       | Tbca                                        | 0.911   | 0.530 | 1.471  | 0.539 | 0.973   | 0.908 | 1.537  | 0.111 |
| 1390311_at   | AW528602  | Tubulin tyrosine ligase                                                                                  | Ttl                                         | 0.498   | 0.044 | 0.723  | 0.105 | 0.469   | 0.023 | 0.750  | 0.064 |
| 1388959_at   | BI297049  | tubulin tyrosine ligase-like family, member 12 (predicted)                                               | Ttl12_predicted                             | 0.559   | 0.010 | 1.848  | 0.001 | 0.589   | 0.161 | 1.650  | 0.004 |
| 1367579_a_at | BI285434  | tubulin, alpha 1 /// tubulin, alpha 6 /// similar to Tubulin alpha-2 chain (Alpha-tubulin 2) (predicted) | Tuba1 /// Tuba6 ///<br>RGD1565476_predicted | 1.044   | 0.358 | 1.104  | 0.022 | 0.882   | 0.660 | 0.924  | 0.539 |
| 1371542_at   | BI284599  | tubulin, alpha 4                                                                                         | Tuba4                                       | 0.598   | 0.143 | 0.916  | 0.348 | 0.559   | 0.010 | 0.933  | 0.878 |
| 1388131_at   | X03369    | Tubulin, beta 2b                                                                                         | Tubb2b                                      | 6.680   | 0.002 | 14.434 | 0.006 | 2.020   | 0.094 | 2.845  | 0.058 |
| 1371390_at   | AA892044  | tubulin, beta 2c                                                                                         | Tubb2c                                      | 0.664   | 0.223 | 1.107  | 0.107 | 0.451   | 0.002 | 0.822  | 0.168 |
| 1371618_s_at | AI229029  | tubulin, beta 3                                                                                          | Tubb3                                       | 1.425   | 0.307 | 1.854  | 0.001 | 1.109   | 0.335 | 1.570  | 0.012 |
| 1387892_at   | BI285440  | tubulin, beta 5                                                                                          | Tubb5                                       | 1.296   | 0.109 | 2.806  | 0.001 | 0.883   | 0.590 | 1.695  | 0.012 |
| 1370290_at   | AB011679  | tubulin, beta 5                                                                                          | Tubb5                                       | 1.107   | 0.265 | 1.896  | 0.111 | 0.875   | 0.613 | 1.312  | 0.317 |
| 1376100_at   | BI274903  | tubulin, beta 6                                                                                          | Tubb6                                       | 0.814   | 0.158 | 15.134 | 0.011 | 0.664   | 0.442 | 11.748 | 0.010 |
| 1381855_at   | AA851436  | Tubulin, epsilon 1 (predicted)                                                                           | Tube1_predicted                             | 1.202   | 0.118 | 2.342  | 0.030 | 1.753   | 0.025 | 1.458  | 0.201 |
| 1383568_at   | BF523441  | tubulin, epsilon 1 (predicted)                                                                           | Tube1_predicted                             | 1.235   | 0.428 | 1.074  | 0.686 | 1.159   | 0.786 | 1.004  | 0.952 |
| 1372660_at   | AI180420  | tubulin, gamma complex associated protein 3                                                              | Tubgcp3                                     | 1.780   | 0.005 | 0.893  | 0.379 | 1.083   | 0.234 | 1.257  | 0.099 |
| 1384220_at   | BE120941  | tubulin-specific chaperone c (predicted)                                                                 | Tbcc_predicted                              | 0.745   | 0.455 | 1.418  | 0.016 | 0.378   | 0.021 | 1.098  | 0.146 |
| 1388869_at   | BF281319  | tubulin-specific chaperone e                                                                             | Tbce                                        | 1.051   | 0.902 | 1.320  | 0.007 | 0.842   | 0.432 | 1.503  | 0.004 |
| 1398401_at   | AI412183  | tudor domain containing 3                                                                                | Tdrd3                                       | 0.971   | 0.619 | 1.869  | 0.163 | 0.870   | 0.695 | 1.274  | 0.662 |
| 1370351_at   | AB030644  | tudor domain containing 7                                                                                | Tdrd7                                       | 1.552   | 0.150 | 1.909  | 0.002 | 2.549   | 0.007 | 2.618  | 0.001 |
| 1384143_at   | BE114778  | Tuftelin 1 (predicted)                                                                                   | Tuft1_predicted                             | 3.446   | 0.001 | 1.324  | 0.028 | 2.953   | 0.002 | 1.036  | 0.458 |
| 1378343_at   | BF405132  | tuftelin interacting protein 11                                                                          | Tfip11                                      | 0.655   | 0.162 | 3.735  | 0.039 | 0.353   | 0.009 | 1.275  | 0.412 |
| 1376335_at   | BI282368  | tuftelin interacting protein 11                                                                          | Tfip11                                      | 1.226   | 0.597 | 2.312  | 0.000 | 0.715   | 0.201 | 1.580  | 0.005 |
| 1377353_a_at | AA800814  | tumor necrosis factor (ligand) superfamily, member 13                                                    | Tnfsf13                                     | 1.026   | 0.700 | 1.179  | 0.755 | 1.000   | 0.998 | 1.739  | 0.110 |
| 1391384_at   | AA819227  | tumor necrosis factor (TNF superfamily, member 2)                                                        | Tnf                                         | 56.918  | 0.004 | 1.511  | 0.029 | 33.129  | 0.010 | 1.757  | 0.022 |
| 1372503_at   | BF283688  | tumor necrosis factor ligand superfamily member 12                                                       | Tnfsf12                                     | 1.030   | 0.893 | 0.752  | 0.062 | 1.099   | 0.560 | 0.614  | 0.047 |
| 1369407_at   | NM_012870 | tumor necrosis factor receptor superfamily, member 11b (osteoprotegerin)                                 | Tnfrsf11b                                   | 6.927   | 0.015 | 1.207  | 0.244 | 5.225   | 0.038 | 0.716  | 0.127 |
| 1371785_at   | BI303379  | tumor necrosis factor receptor superfamily, member 12a                                                   | Tnfrsf12a                                   | 4.303   | 0.004 | 7.708  | 0.031 | 5.009   | 0.014 | 4.125  | 0.045 |
| 1376327_at   | AI169601  | tumor necrosis factor receptor superfamily, member 14 (herpesvirus entry mediator)                       | Tnfrsf14                                    | 4.172   | 0.020 | 2.290  | 0.048 | 71.650  | 0.000 | 46.186 | 0.003 |
| 1367715_at   | NM_013091 | tumor necrosis factor receptor superfamily, member 1a                                                    | Tnfrsf1a                                    | 1.555   | 0.250 | 1.759  | 0.002 | 1.514   | 0.004 | 1.997  | 0.002 |
| 1377698_at   | AW433947  | tumor necrosis factor receptor superfamily, member 5                                                     | Tnfrsf5                                     | 625.638 | 0.004 | 98.062 | 0.002 | 947.693 | 0.003 | 47.619 | 0.000 |
| 1384842_s_at | AI231531  | Tumor necrosis factor receptor superfamily, member 6                                                     | Tnfrsf6                                     | 5.873   | 0.000 | 5.428  | 0.009 | 7.650   | 0.009 | 3.634  | 0.030 |
| 1368635_at   | NM_019135 | tumor necrosis factor receptor superfamily, member 8                                                     | Tnfrsf8                                     | 1.002   | 0.822 | 0.818  | 0.439 | 0.636   | 0.024 | 0.558  | 0.175 |
| 1371876_at   | BM387084  | tumor necrosis factor superfamily, member 5-induced protein 1 (predicted)                                | Tnfsf5ip1_predicted                         | 0.456   | 0.039 | 2.761  | 0.000 | 0.602   | 0.028 | 2.381  | 0.000 |
| 1372436_at   | BG668434  | tumor protein D52-like 2                                                                                 | Tpd52l2                                     | 1.240   | 0.199 | 3.814  | 0.002 | 1.555   | 0.457 | 2.862  | 0.002 |
| 1367831_at   | NM_030989 | tumor protein p53                                                                                        | Tp53                                        | 1.584   | 0.003 | 1.593  | 0.033 | 2.787   | 0.002 | 2.864  | 0.003 |
| 1367830_a_at | NM_030989 | tumor protein p53                                                                                        | Tp53                                        | 1.303   | 0.154 | 1.760  | 0.065 | 1.453   | 0.067 | 1.454  | 0.015 |
| 1370752_a_at | AY009504  | tumor protein p53                                                                                        | Tp53                                        | 1.005   | 0.562 | 1.152  | 0.725 | 1.289   | 0.142 | 1.193  | 0.465 |
| 1375420_at   | AI170535  | tumor protein p53 inducible protein 11 (predicted)                                                       | Tp53i11_predicted                           | 1.326   | 0.515 | 1.166  | 0.139 | 1.018   | 0.750 | 1.535  | 0.005 |
| 1388812_at   | AI230362  | tumor protein p53 inducible protein 13 (predicted)                                                       | Trp53i13_predicted                          | 0.789   | 0.005 | 0.480  | 0.019 | 0.763   | 0.015 | 0.476  | 0.011 |
| 1367583_at   | NM_053867 | tumor protein, translationally-controlled 1                                                              | Tpt1                                        | 0.891   | 0.865 | 0.985  | 0.536 | 0.884   | 0.892 | 0.990  | 0.813 |
| 1388331_at   | BG057543  | tumor rejection antigen gp96 (predicted)                                                                 | Tra1_predicted                              | 0.833   | 0.332 | 0.842  | 0.003 | 1.084   | 0.609 | 0.762  | 0.002 |
| 1379385_at   | AW534879  | tumor suppressing subtransferable candidate 1                                                            | Tssc1                                       | 0.544   | 0.045 | 0.943  | 0.576 | 0.510   | 0.007 | 0.941  | 0.746 |
| 1375858_at   | BI285715  | tumor suppressor candidate 4                                                                             | Tusc4                                       | 0.474   | 0.039 | 0.947  | 0.850 | 0.637   | 0.265 | 0.860  | 0.595 |
| 1372122_at   | AI234654  | tumor susceptibility gene 101                                                                            | Tsg101                                      | 0.946   | 0.898 | 1.284  | 0.013 | 0.776   | 0.186 | 1.098  | 0.059 |
| 1388199_at   | BG376410  | tumor-associated calcium signal transducer 1                                                             | Tacstd1                                     | 0.835   | 0.529 | 1.177  | 0.047 | 0.712   | 0.049 | 1.017  | 0.506 |
| 1390279_at   | BI282086  | tumor-suppressing subchromosomal transferable fragment 4                                                 | Tssc4                                       | 1.421   | 0.027 | 0.730  | 0.032 | 1.211   | 0.220 | 1.001  | 0.988 |
| 1376340_a_at | BI282086  | tumor-suppressing subchromosomal transferable fragment 4                                                 | Tssc4                                       | 0.845   | 0.558 | 0.521  | 0.046 | 1.437   | 0.191 | 0.871  | 0.043 |
| 1375905_at   | AI412746  | tweety homolog 1 (Drosophila) (predicted)                                                                | Ttyh1_predicted                             | 1.596   | 0.001 | 1.070  | 0.782 | 0.959   | 0.349 | 0.655  | 0.133 |
| 1377842_at   | AW533281  | TWIST neighbor (predicted)                                                                               | Twistnb_predicted                           | 0.841   | 0.080 | 1.289  | 0.101 | 0.696   | 0.020 | 1.354  | 0.057 |

|              |           |                                                                                                                           |                     |         |       |        |       |         |       |         |       |
|--------------|-----------|---------------------------------------------------------------------------------------------------------------------------|---------------------|---------|-------|--------|-------|---------|-------|---------|-------|
| 1370358_at   | AB018253  | two pore channel 1                                                                                                        | Tpcn1               | 1.842   | 0.005 | 0.775  | 0.110 | 1.109   | 0.544 | 0.563   | 0.021 |
| 1376313_at   | BI296463  | two pore segment channel 2 (predicted)                                                                                    | Tpcn2_predicted     | 2.210   | 0.001 | 1.519  | 0.008 | 1.291   | 0.472 | 1.194   | 0.320 |
| 1387149_at   | NM_030836 | type 1 tumor necrosis factor receptor shedding aminopeptidase regulator                                                   | Arts1               | 11.170  | 0.001 | 1.576  | 0.136 | 4.056   | 0.009 | 1.873   | 0.049 |
| 1368356_a_at | NM_030836 | type 1 tumor necrosis factor receptor shedding aminopeptidase regulator                                                   | Arts1               | 2.116   | 0.014 | 2.274  | 0.005 | 2.428   | 0.001 | 3.038   | 0.004 |
| 1399161_a_at | AF148323  | type 1 tumor necrosis factor receptor shedding aminopeptidase regulator                                                   | Arts1               | 1.814   | 0.039 | 2.054  | 0.002 | 2.133   | 0.013 | 2.777   | 0.005 |
| 1373842_at   | BM390718  | Type II keratin Kb1                                                                                                       | Kb1                 | 0.646   | 0.102 | 0.513  | 0.001 | 0.733   | 0.111 | 0.615   | 0.009 |
| 1386999_at   | BG380730  | tyrosine 3-monooxygenase/tryptophan 5-monooxygenase activation protein, beta polypeptide                                  | Ywhab               | 0.738   | 0.690 | 0.880  | 0.106 | 0.622   | 0.162 | 0.814   | 0.089 |
| 1398800_at   | NM_019377 | tyrosine 3-monooxygenase/tryptophan 5-monooxygenase activation protein, beta polypeptide                                  | Ywhab               | 1.020   | 0.982 | 0.591  | 0.007 | 1.081   | 0.092 | 0.651   | 0.008 |
| 1398504_at   | BF391867  | Tyrosine 3-monooxygenase/tryptophan 5-monooxygenase activation protein, epsilon polypeptide                               | Ywhae               | 3.190   | 0.411 | 1.418  | 0.405 | 1.099   | 0.902 | 1.108   | 0.420 |
| 1398851_at   | AA892351  | tyrosine 3-monooxygenase/tryptophan 5-monooxygenase activation protein, epsilon polypeptide                               | Ywhae               | 1.000   | 0.765 | 0.988  | 0.087 | 1.009   | 0.407 | 1.145   | 0.079 |
| 1367693_at   | NM_013052 | tyrosine 3-monooxygenase/tryptophan 5-monooxygenase activation protein, eta polypeptide                                   | Ywhah               | 1.684   | 0.001 | 1.496  | 0.001 | 1.909   | 0.002 | 1.428   | 0.005 |
| 1386866_at   | NM_019376 | tyrosine 3-monooxygenase/tryptophan 5-monooxygenase activation protein, gamma polypeptide                                 | Ywhag               | 0.842   | 0.320 | 1.012  | 0.939 | 0.876   | 0.012 | 1.000   | 0.996 |
| 1387862_at   | BF281342  | tyrosine 3-monooxygenase/tryptophan 5-monooxygenase activation protein, theta polypeptide                                 | Ywhaq               | 0.693   | 0.245 | 0.915  | 0.059 | 0.710   | 0.042 | 0.957   | 0.232 |
| 1370168_at   | BI277793  | tyrosine 3-monooxygenase/tryptophan 5-monooxygenase activation protein, theta polypeptide                                 | Ywhaq               | 0.596   | 0.582 | 0.830  | 0.427 | 0.451   | 0.167 | 0.882   | 0.561 |
| 1387774_at   | D17615    | tyrosine 3-monooxygenase/tryptophan 5-monooxygenase activation protein, zeta polypeptide                                  | Ywhaz               | 1.114   | 0.766 | 0.914  | 0.067 | 0.889   | 0.755 | 0.740   | 0.029 |
| 1373443_a_at | AI228292  | tyrosine hydroxylase                                                                                                      | Th                  | 0.981   | 0.769 | 0.834  | 0.252 | 1.096   | 0.558 | 1.384   | 0.684 |
| 1372692_at   | AI406490  | tyrosine kinase, non-receptor, 2                                                                                          | Tnk2                | 0.919   | 0.421 | 0.999  | 0.981 | 0.968   | 0.848 | 0.823   | 0.029 |
| 1382672_a_at | AW918207  | tyrosine protein kinase FLK                                                                                               | Flk                 | 0.620   | 0.027 | 1.448  | 0.036 | 0.564   | 0.036 | 1.765   | 0.188 |
| 1377137_at   | BG379860  | tyrosyl-DNA phosphodiesterase 1                                                                                           | Tdp1                | 0.889   | 0.797 | 1.494  | 0.178 | 0.845   | 0.279 | 0.869   | 0.623 |
| 1379007_at   | AI712659  | Tyrosylprotein sulfotransferase 1                                                                                         | Tpst1               | 1.003   | 0.998 | 0.762  | 0.119 | 1.006   | 0.962 | 0.651   | 0.126 |
| 1398994_at   | BI301193  | tyrosylprotein sulfotransferase 2                                                                                         | Tpst2               | 0.456   | 0.004 | 0.398  | 0.000 | 0.322   | 0.001 | 0.412   | 0.008 |
| 1372009_at   | AI407490  | tyrosyl-tRNA synthetase                                                                                                   | Yars                | 1.310   | 0.070 | 2.207  | 0.003 | 1.124   | 0.003 | 2.209   | 0.004 |
| 1393033_at   | BG669575  | tyrosyl-tRNA synthetase 2 (mitochondrial)                                                                                 | Yars2               | 0.574   | 0.322 | 1.102  | 0.581 | 0.568   | 0.032 | 1.447   | 0.071 |
| 1371486_at   | BG380657  | U1 small nuclear ribonucleoprotein 1C (predicted)                                                                         | Snrp1c_predicted    | 0.741   | 0.156 | 1.469  | 0.005 | 0.753   | 0.142 | 1.223   | 0.077 |
| 1384375_at   | BE100151  | U1 small nuclear ribonucleoprotein polypeptide A (predicted)                                                              | Snrp70_predicted    | 1.422   | 0.008 | 1.934  | 0.093 | 1.036   | 0.575 | 1.314   | 0.092 |
| 1371742_at   | BE102265  | U1 small nuclear ribonucleoprotein polypeptide A (predicted)                                                              | Snrp70_predicted    | 0.665   | 0.063 | 0.913  | 0.320 | 1.633   | 0.479 | 0.721   | 0.346 |
| 1388797_at   | AI232163  | U2 small nuclear ribonucleoprotein auxiliary factor (U2AF) 2                                                              | U2af2               | 0.830   | 0.003 | 1.566  | 0.010 | 0.860   | 0.354 | 1.232   | 0.066 |
| 1389576_at   | AA944322  | U2 small nuclear ribonucleoprotein B (predicted)                                                                          | Snrpb2_predicted    | 1.011   | 0.921 | 1.170  | 0.641 | 0.789   | 0.083 | 1.376   | 0.075 |
| 1373205_at   | BM391897  | U2 small nuclear RNA auxiliary factor 1-like 4                                                                            | U2af114             | 0.555   | 0.250 | 1.082  | 0.972 | 0.813   | 0.403 | 1.085   | 0.838 |
| 1395143_at   | BF389774  | U2AF homology motif (UHM) kinase 1                                                                                        | Uhmk1               | 1.163   | 0.173 | 0.926  | 0.998 | 2.379   | 0.014 | 1.087   | 0.638 |
| 1387406_at   | NM_017293 | U2AF homology motif (UHM) kinase 1                                                                                        | Uhmk1               | 0.986   | 0.790 | 1.545  | 0.062 | 1.509   | 0.134 | 1.640   | 0.026 |
| 1370525_at   | U13176    | ubc2e ubiquitin conjugating enzyme                                                                                        | Ubc2e               | 0.698   | 0.544 | 0.934  | 0.290 | 0.687   | 0.522 | 0.733   | 0.004 |
| 1370523_a_at | AW142720  | ubc2e ubiquitin conjugating enzyme                                                                                        | Ubc2e               | 1.048   | 0.759 | 1.360  | 0.058 | 0.800   | 0.773 | 1.097   | 0.530 |
| 1381238_at   | BE102046  | UbiA prenyltransferase domain containing 1 (predicted)                                                                    | Ubiad1_predicted    | 1.280   | 0.534 | 1.073  | 0.810 | 1.326   | 0.086 | 0.889   | 0.549 |
| 1373598_at   | BE116948  | ubiquitin 1 (predicted)                                                                                                   | Ubn1_predicted      | 1.431   | 0.204 | 1.087  | 0.120 | 0.989   | 0.579 | 0.910   | 0.720 |
| 1381878_at   | AI578566  | ubiquitin 1 (predicted)                                                                                                   | Ubn1_predicted      | 1.282   | 0.771 | 2.084  | 0.094 | 0.864   | 0.305 | 1.044   | 0.350 |
| 1388719_at   | BI279735  | Ubiquilin 1                                                                                                               | Ubqln1              | 0.662   | 0.106 | 0.577  | 0.003 | 0.637   | 0.049 | 0.686   | 0.004 |
| 1387041_at   | NM_053747 | ubiquilin 1                                                                                                               | Ubqln1              | 0.985   | 0.887 | 2.395  | 0.003 | 0.884   | 0.171 | 2.409   | 0.000 |
| 1372131_at   | BF398140  | ubiquilin 2 (predicted)                                                                                                   | Ubqln2_predicted    | 0.663   | 0.137 | 0.624  | 0.000 | 0.845   | 0.069 | 0.840   | 0.012 |
| 1388691_at   | AI177410  | ubiquilin 4 (predicted)                                                                                                   | Ubqln4_predicted    | 1.222   | 0.052 | 1.860  | 0.007 | 1.121   | 0.404 | 1.892   | 0.045 |
| 1373362_at   | BI296109  | ubiquinol cytochrome c reductase core protein 2                                                                           | Uqcrc2              | 0.542   | 0.035 | 0.754  | 0.101 | 0.614   | 0.183 | 0.719   | 0.005 |
| 1382280_at   | BF290998  | ubiquinol cytochrome c reductase core protein 2                                                                           | Uqcrc2              | 0.663   | 0.307 | 0.797  | 0.023 | 0.829   | 0.341 | 0.455   | 0.044 |
| 1374426_at   | BG670074  | ubiquinol-cytochrome c reductase binding protein (predicted)                                                              | Uqcrb_predicted     | 0.996   | 0.772 | 1.052  | 0.822 | 0.821   | 0.037 | 0.932   | 0.478 |
| 1388301_at   | BI287993  | ubiquinol-cytochrome c reductase core protein 1                                                                           | Uqcrc1              | 0.684   | 0.041 | 1.282  | 0.005 | 0.677   | 0.001 | 1.194   | 0.027 |
| 1371415_at   | BI279016  | ubiquinol-cytochrome c reductase hinge protein                                                                            | Uqcrh               | 0.763   | 0.369 | 0.956  | 0.516 | 0.670   | 0.053 | 0.916   | 0.466 |
| 1371254_at   | AI179382  | ubiquinol-cytochrome c reductase, Rieske iron-sulfur polypeptide 1                                                        | Uqcrfs1             | 0.638   | 0.481 | 0.794  | 0.082 | 0.552   | 0.149 | 0.712   | 0.045 |
| 1398754_at   | NM_031687 | ubiquitin A-52 residue ribosomal protein fusion product 1                                                                 | Uba52               | 0.881   | 0.945 | 1.254  | 0.032 | 0.831   | 0.104 | 1.119   | 0.087 |
| 1388387_at   | BI275880  | ubiquitin associated domain containing 1                                                                                  | Ubadc1              | 0.915   | 0.318 | 1.310  | 0.018 | 0.583   | 0.104 | 1.084   | 0.493 |
| 1398767_at   | NM_017314 | ubiquitin C                                                                                                               | Ubc                 | 1.242   | 0.048 | 1.922  | 0.002 | 1.223   | 0.102 | 1.567   | 0.003 |
| 1370554_at   | AB043959  | ubiquitin carboxyl-terminal esterase L3 (ubiquitin thiolesterase) /// similar to ubiquitin carboxyl-terminal hydrolase L3 | Uchl3 /// LOC498560 | 2.031   | 0.048 | 1.096  | 0.563 | 1.170   | 0.380 | 0.894   | 0.120 |
| 1391724_at   | AI102641  | Ubiquitin carboxyl-terminal hydrolase L5                                                                                  | Uchl5               | 0.788   | 0.015 | 0.984  | 0.874 | 0.872   | 0.045 | 0.956   | 0.278 |
| 1383477_at   | BG668115  | ubiquitin carboxyl-terminal hydrolase L5                                                                                  | Uchl5               | 0.960   | 0.918 | 1.036  | 0.827 | 0.791   | 0.084 | 0.719   | 0.133 |
| 1369977_at   | NM_017237 | ubiquitin carboxy-terminal hydrolase L1                                                                                   | Uchl1               | 0.762   | 0.758 | 0.997  | 0.418 | 0.826   | 0.081 | 0.913   | 0.949 |
| 1368762_at   | NM_053299 | ubiquitin D                                                                                                               | Ubd                 | 285.958 | 0.015 | 94.664 | 0.019 | 551.605 | 0.014 | 128.556 | 0.017 |
| 1388696_at   | BI291922  | ubiquitin fusion degradation 1-like                                                                                       | Ufd1l               | 0.769   | 0.093 | 1.227  | 0.449 | 0.669   | 0.019 | 1.148   | 0.988 |
| 1368665_at   | NM_053418 | ubiquitin fusion degradation 1-like                                                                                       | Ufd1l               | 0.559   | 0.577 | 1.159  | 0.619 | 0.400   | 0.019 | 1.113   | 0.947 |
| 1382741_at   | BI285961  | ubiquitin protein ligase E3A (predicted)                                                                                  | Ube3a_predicted     | 1.057   | 0.423 | 1.083  | 0.118 | 0.761   | 0.034 | 0.894   | 0.469 |
| 1391393_at   | BE117623  | ubiquitin protein ligase E3A (predicted)                                                                                  | Ube3a_predicted     | 1.074   | 0.955 | 1.369  | 0.190 | 1.100   | 0.941 | 1.012   | 0.917 |
| 1373538_at   | AW525342  | ubiquitin specific peptidase 1                                                                                            | Usp1                | 0.877   | 0.043 | 1.859  | 0.053 | 1.163   | 0.411 | 1.572   | 0.538 |
| 1376687_at   | AI010241  | ubiquitin specific peptidase 1                                                                                            | Usp1                | 0.438   | 0.255 | 2.125  | 0.010 | 0.376   | 0.035 | 1.398   | 0.054 |

|              |           |                                                                     |                  |       |       |       |       |        |       |        |       |
|--------------|-----------|---------------------------------------------------------------------|------------------|-------|-------|-------|-------|--------|-------|--------|-------|
| 1370460_at   | AF106657  | ubiquitin specific peptidase 15                                     | Usp15            | 1.351 | 0.102 | 2.171 | 0.002 | 1.406  | 0.130 | 2.156  | 0.010 |
| 1389034_at   | BI295179  | ubiquitin specific peptidase 18                                     | Usp18            | 9.255 | 0.000 | 8.298 | 0.001 | 18.394 | 0.000 | 22.054 | 0.004 |
| 1389091_at   | AI411205  | ubiquitin specific peptidase 3                                      | Usp3             | 3.778 | 0.002 | 3.509 | 0.005 | 2.045  | 0.008 | 2.013  | 0.018 |
| 1388896_at   | BF404603  | ubiquitin specific peptidase 33                                     | Usp33            | 0.810 | 0.007 | 0.858 | 0.039 | 0.660  | 0.006 | 0.843  | 0.092 |
| 1391770_at   | BE108244  | Ubiquitin specific peptidase 33                                     | Usp33            | 0.819 | 0.395 | 1.021 | 0.609 | 0.752  | 0.031 | 0.740  | 0.176 |
| 1389316_at   | AW914946  | Ubiquitin specific peptidase 9, X chromosome (predicted)            | Usp9x_predicted  | 0.814 | 0.225 | 0.404 | 0.001 | 0.924  | 0.235 | 0.468  | 0.000 |
| 1372150_at   | AI229488  | ubiquitin specific protease 10                                      | Usp10            | 0.647 | 0.071 | 1.683 | 0.022 | 0.623  | 0.002 | 1.186  | 0.093 |
| 1376171_at   | AA851303  | ubiquitin specific protease 11                                      | Usp11            | 0.720 | 0.589 | 1.303 | 0.119 | 1.104  | 0.417 | 1.227  | 0.166 |
| 1385035_at   | AI639241  | ubiquitin specific protease 12 (predicted)                          | Usp12_predicted  | 0.548 | 0.395 | 0.770 | 0.105 | 0.720  | 0.636 | 1.118  | 0.515 |
| 1381605_at   | AW521619  | ubiquitin specific protease 13 (isopeptidase T-3) (predicted)       | Usp13_predicted  | 0.417 | 0.000 | 0.608 | 0.008 | 0.351  | 0.022 | 0.506  | 0.017 |
| 1385663_at   | BF567505  | ubiquitin specific protease 13 (isopeptidase T-3) (predicted)       | Usp13_predicted  | 0.393 | 0.096 | 0.338 | 0.008 | 0.268  | 0.014 | 0.334  | 0.005 |
| 1383073_at   | BG666028  | ubiquitin specific protease 14                                      | Usp14            | 0.854 | 0.323 | 0.777 | 0.001 | 0.827  | 0.170 | 0.857  | 0.027 |
| 1399038_at   | AA893224  | ubiquitin specific protease 19                                      | Usp19            | 1.167 | 0.486 | 1.427 | 0.150 | 1.172  | 0.368 | 1.003  | 0.996 |
| 1371874_at   | AI175026  | ubiquitin specific protease 19                                      | Usp19            | 0.966 | 0.786 | 0.892 | 0.098 | 1.175  | 0.285 | 0.902  | 0.097 |
| 1378309_at   | AW434880  | ubiquitin specific protease 20 (predicted)                          | Usp20_predicted  | 0.682 | 0.034 | 1.127 | 0.887 | 0.758  | 0.236 | 0.812  | 0.999 |
| 1376656_at   | BI274796  | ubiquitin specific protease 20 (predicted)                          | Usp20_predicted  | 0.613 | 0.065 | 0.614 | 0.053 | 0.590  | 0.106 | 0.758  | 0.135 |
| 1386338_at   | AI704873  | Ubiquitin specific protease 22 (predicted)                          | Usp22_predicted  | 1.138 | 0.595 | 1.218 | 0.038 | 1.026  | 0.861 | 1.053  | 0.086 |
| 1394078_at   | AW921158  | ubiquitin specific protease 22 (predicted)                          | Usp22_predicted  | 1.145 | 0.608 | 0.982 | 0.183 | 1.176  | 0.705 | 1.008  | 0.441 |
| 1384456_at   | BE118916  | Ubiquitin specific protease 24 (predicted)                          | Usp24_predicted  | 1.367 | 0.080 | 3.495 | 0.013 | 1.709  | 0.146 | 2.017  | 0.020 |
| 1378679_at   | BG372484  | Ubiquitin specific protease 25 (predicted)                          | Usp25_predicted  | 8.431 | 0.000 | 2.612 | 0.009 | 12.593 | 0.000 | 4.419  | 0.000 |
| 1373163_at   | BI287702  | Ubiquitin specific protease 28 (predicted)                          | Usp28_predicted  | 1.241 | 0.434 | 1.003 | 0.979 | 1.475  | 0.678 | 1.271  | 0.056 |
| 1395054_at   | BF416262  | ubiquitin specific protease 29 (predicted)                          | Usp29_predicted  | 1.650 | 0.519 | 0.488 | 0.184 | 0.448  | 0.274 | 0.489  | 0.185 |
| 1372570_at   | AI145892  | ubiquitin specific protease 30 (predicted)                          | Usp30_predicted  | 0.726 | 0.081 | 1.051 | 0.912 | 0.796  | 0.110 | 1.045  | 0.592 |
| 1390486_at   | AI231505  | ubiquitin specific protease 32 (predicted)                          | Usp32_predicted  | 1.927 | 0.055 | 1.074 | 0.145 | 1.416  | 0.195 | 1.609  | 0.024 |
| 1395019_at   | AI101440  | ubiquitin specific protease 38 (predicted)                          | Usp38_predicted  | 0.672 | 0.113 | 0.772 | 0.208 | 0.793  | 0.178 | 0.650  | 0.147 |
| 1389344_at   | BE109258  | ubiquitin specific protease 39 (predicted)                          | Usp39_predicted  | 0.723 | 0.172 | 2.003 | 0.030 | 0.951  | 0.272 | 2.147  | 0.027 |
| 1394958_at   | BF402345  | Ubiquitin specific protease 40                                      | Usp40            | 0.914 | 0.249 | 1.189 | 0.080 | 0.476  | 0.061 | 1.162  | 0.922 |
| 1381420_at   | BF397624  | Ubiquitin specific protease 47 (predicted)                          | Usp47_predicted  | 1.211 | 0.066 | 1.724 | 0.075 | 1.480  | 0.059 | 1.536  | 0.127 |
| 1373157_at   | AI407830  | ubiquitin specific protease 47 (predicted)                          | Usp47_predicted  | 1.048 | 0.323 | 1.419 | 0.367 | 0.782  | 0.021 | 1.017  | 0.916 |
| 1399036_at   | AA964374  | ubiquitin specific protease 47 (predicted)                          | Usp47_predicted  | 0.898 | 0.683 | 1.694 | 0.014 | 0.954  | 0.560 | 1.816  | 0.029 |
| 1399029_at   | BI285965  | ubiquitin specific protease 48                                      | Usp48            | 0.518 | 0.042 | 0.360 | 0.002 | 0.604  | 0.021 | 0.463  | 0.052 |
| 1376849_at   | BM384872  | ubiquitin specific protease 48                                      | Usp48            | 0.717 | 0.456 | 2.400 | 0.001 | 1.050  | 0.998 | 2.284  | 0.003 |
| 1388938_at   | AI411387  | ubiquitin specific protease 5 (isopeptidase T) (predicted)          | Usp5_predicted   | 1.011 | 0.715 | 0.985 | 0.399 | 0.939  | 0.481 | 0.904  | 0.314 |
| 1394393_at   | BE114562  | ubiquitin specific protease 7 (herpes virus-associated)             | Usp7             | 1.262 | 0.367 | 2.196 | 0.004 | 0.753  | 0.189 | 1.972  | 0.031 |
| 1393042_at   | BI288780  | Ubiquitin specific protease 7 (herpes virus-associated)             | Usp7             | 0.861 | 0.497 | 0.865 | 0.046 | 0.958  | 0.487 | 0.937  | 0.929 |
| 1398351_at   | AI175593  | Ubiquitin specific protease 7 (herpes virus-associated)             | Usp7             | 0.783 | 0.948 | 0.728 | 0.052 | 1.024  | 0.566 | 0.815  | 0.407 |
| 1383609_at   | BI276086  | Ubiquitin specific protease 7 (herpes virus-associated)             | Usp7             | 0.953 | 0.972 | 0.629 | 0.055 | 1.001  | 0.327 | 0.602  | 0.048 |
| 1397621_at   | AI502942  | Ubiquitin specific protease 8 (predicted)                           | Usp8_predicted   | 1.053 | 0.853 | 0.518 | 0.018 | 0.985  | 0.639 | 1.167  | 0.487 |
| 1390027_at   | AI137190  | ubiquitin specific protease 8 (predicted)                           | Usp8_predicted   | 0.683 | 0.986 | 0.640 | 0.054 | 1.772  | 0.354 | 0.929  | 0.592 |
| 1398813_at   | NM_057205 | ubiquitin-activating enzyme E1C                                     | Ube1c            | 0.900 | 0.768 | 1.045 | 0.037 | 1.089  | 0.355 | 1.020  | 0.790 |
| 1372120_at   | AI408025  | ubiquitin-activating enzyme E1-domain containing 1                  | Ube1dc1          | 0.767 | 0.070 | 1.168 | 0.071 | 1.058  | 0.113 | 1.092  | 0.352 |
| 1372119_at   | BM389270  | ubiquitin-activating enzyme E1-domain containing 1                  | Ube1dc1          | 0.985 | 0.955 | 2.709 | 0.005 | 0.969  | 0.825 | 2.321  | 0.000 |
| 1379633_a_at | BE096453  | ubiquitin-activating enzyme E1-like (predicted)                     | Ube11_predicted  | 5.171 | 0.011 | 4.433 | 0.004 | 12.740 | 0.002 | 8.056  | 0.000 |
| 1386277_at   | AI177396  | ubiquitin-activating enzyme E1-like (predicted)                     | Ube11_predicted  | 3.048 | 0.036 | 1.302 | 0.139 | 10.641 | 0.000 | 3.163  | 0.033 |
| 1379634_at   | AW921187  | ubiquitin-activating enzyme E1-like (predicted)                     | Ube11_predicted  | 1.144 | 0.255 | 1.076 | 0.033 | 1.639  | 0.010 | 1.008  | 0.213 |
| 1388677_at   | BI275991  | ubiquitin-associated protein 1                                      | Uba1             | 2.180 | 0.122 | 3.794 | 0.011 | 1.465  | 0.402 | 2.934  | 0.072 |
| 1372127_at   | BI275824  | ubiquitin-associated protein 2 (predicted)                          | Uba2_predicted   | 0.939 | 0.072 | 1.417 | 0.046 | 1.449  | 0.227 | 1.476  | 0.071 |
| 1372888_at   | BI294856  | ubiquitination factor E4A, UFD2 homolog (S. cerevisiae)             | Ube4a            | 0.600 | 0.022 | 0.438 | 0.000 | 0.714  | 0.036 | 0.501  | 0.000 |
| 1385615_at   | BF550268  | ubiquitination factor E4A, UFD2 homolog (S. cerevisiae)             | Ube4a            | 0.722 | 0.159 | 1.545 | 0.094 | 0.999  | 0.569 | 0.999  | 0.989 |
| 1384053_at   | BF556415  | ubiquitination factor E4A, UFD2 homolog (S. cerevisiae)             | Ube4a            | 1.003 | 0.997 | 0.963 | 0.040 | 1.018  | 0.927 | 0.928  | 0.222 |
| 1376862_at   | BI296848  | ubiquitination factor E4B, UFD2 homolog (S. cerevisiae) (predicted) | Ube4b_predicted  | 0.463 | 0.003 | 0.364 | 0.000 | 0.680  | 0.064 | 0.543  | 0.006 |
| 1374507_at   | BE096671  | ubiquitination factor E4B, UFD2 homolog (S. cerevisiae) (predicted) | Ube4b_predicted  | 0.810 | 0.077 | 1.032 | 0.132 | 0.669  | 0.087 | 0.891  | 0.430 |
| 1398897_at   | AI411988  | ubiquitin-conjugating enzyme E2 variant 1 (predicted)               | Ube2v1_predicted | 1.560 | 0.002 | 1.346 | 0.072 | 1.503  | 0.003 | 1.238  | 0.103 |
| 1372143_at   | AA849958  | ubiquitin-conjugating enzyme E2 variant 2                           | Ube2v2           | 0.752 | 0.044 | 1.080 | 0.422 | 0.723  | 0.015 | 1.039  | 0.266 |
| 1373495_at   | AW915822  | ubiquitin-conjugating enzyme E2, J1 (predicted)                     | Ube2j1_predicted | 1.128 | 0.366 | 4.657 | 0.000 | 0.731  | 0.231 | 3.786  | 0.000 |
| 1392573_at   | BF284538  | ubiquitin-conjugating enzyme E2A, RAD6 homolog (S. cerevisiae)      | Ube2a            | 1.134 | 0.442 | 1.045 | 0.618 | 1.253  | 0.322 | 1.228  | 0.135 |
| 1388863_at   | BE111651  | ubiquitin-conjugating enzyme E2A, RAD6 homolog (S. cerevisiae)      | Ube2a            | 0.952 | 0.836 | 0.894 | 0.078 | 0.995  | 0.934 | 0.862  | 0.333 |
| 1380087_at   | BE119409  | Ubiquitin-conjugating enzyme E2B, RAD6 homolog (S. cerevisiae)      | Ube2b            | 2.289 | 0.094 | 0.958 | 0.146 | 1.172  | 0.495 | 0.817  | 0.241 |
| 1375642_at   | AA892795  | ubiquitin-conjugating enzyme E2B, RAD6 homolog (S. cerevisiae)      | Ube2b            | 0.809 | 0.466 | 0.638 | 0.006 | 0.761  | 0.169 | 0.627  | 0.002 |
| 1386923_at   | M62388    | ubiquitin-conjugating enzyme E2B, RAD6 homolog (S. cerevisiae)      | Ube2b            | 1.050 | 0.936 | 1.174 | 0.065 | 1.092  | 0.574 | 1.077  | 0.879 |
| 1374890_at   | AW533905  | Ubiquitin-conjugating enzyme E2D 2                                  | Ube2d2           | 0.711 | 0.439 | 0.530 | 0.066 | 0.524  | 0.134 | 0.653  | 0.001 |



|              |           |                                                                                                                                                                                                                                                                                                                                                                                                                                   |                                                                                               |        |       |        |       |        |       |        |       |
|--------------|-----------|-----------------------------------------------------------------------------------------------------------------------------------------------------------------------------------------------------------------------------------------------------------------------------------------------------------------------------------------------------------------------------------------------------------------------------------|-----------------------------------------------------------------------------------------------|--------|-------|--------|-------|--------|-------|--------|-------|
| 1399160_a_at | U13177    | ubiquitin-conjugating enzyme E2D 3 (UBC4/5 homolog, yeast)                                                                                                                                                                                                                                                                                                                                                                        | Ube2d3                                                                                        | 1.903  | 0.021 | 3.795  | 0.000 | 1.436  | 0.125 | 3.308  | 0.001 |
| 1372586_at   | AI411995  | Ubiquitin-conjugating enzyme E2D 3 (UBC4/5 homolog, yeast)                                                                                                                                                                                                                                                                                                                                                                        | Ube2d3                                                                                        | 1.289  | 0.224 | 0.943  | 0.268 | 1.302  | 0.083 | 1.094  | 0.516 |
| 1367456_at   | NM_031237 | ubiquitin-conjugating enzyme E2D 3 (UBC4/5 homolog, yeast)                                                                                                                                                                                                                                                                                                                                                                        | Ube2d3                                                                                        | 1.387  | 0.245 | 1.299  | 0.030 | 1.352  | 0.139 | 1.257  | 0.003 |
| 1398802_at   | AW435034  | Ubiquitin-conjugating enzyme E2D 3 (UBC4/5 homolog, yeast)                                                                                                                                                                                                                                                                                                                                                                        | Ube2d3                                                                                        | 1.266  | 0.281 | 1.214  | 0.037 | 1.160  | 0.190 | 1.182  | 0.032 |
| 1388798_at   | AW921519  | ubiquitin-conjugating enzyme E2E 2 (UBC4/5 homolog, yeast)                                                                                                                                                                                                                                                                                                                                                                        | Ube2e2                                                                                        | 1.149  | 0.137 | 2.176  | 0.010 | 1.334  | 0.037 | 4.743  | 0.019 |
| 1376438_at   | BF416513  | Ubiquitin-conjugating enzyme E2E 2 (UBC4/5 homolog, yeast)                                                                                                                                                                                                                                                                                                                                                                        | Ube2e2                                                                                        | 1.018  | 0.728 | 1.133  | 0.972 | 1.278  | 0.452 | 0.914  | 0.903 |
| 1384121_at   | AI058309  | Ubiquitin-conjugating enzyme E2E 2 (UBC4/5 homolog, yeast)                                                                                                                                                                                                                                                                                                                                                                        | Ube2e2                                                                                        | 0.833  | 0.756 | 0.970  | 0.277 | 0.833  | 0.554 | 0.928  | 0.651 |
| 1367484_at   | BM391175  | ubiquitin-conjugating enzyme E2E 2 (UBC4/5 homolog, yeast) /// similar to Ubiquitin-conjugating enzyme E2 E1 (Ubiquitin-protein ligase E1) (predicted)                                                                                                                                                                                                                                                                            | Ube2e2 ///<br>RGD1561054_predicted                                                            | 0.995  | 0.406 | 0.896  | 0.060 | 1.458  | 0.041 | 1.003  | 0.971 |
| 1389534_at   | BF282336  | ubiquitin-conjugating enzyme E2E 3, UBC4/5 homolog (yeast) (predicted)                                                                                                                                                                                                                                                                                                                                                            | Ube2e3_predicted                                                                              | 0.926  | 0.716 | 0.701  | 0.176 | 0.929  | 0.512 | 0.804  | 0.111 |
| 1375663_at   | AI232346  | ubiquitin-conjugating enzyme E2F (putative)                                                                                                                                                                                                                                                                                                                                                                                       | Ube2f                                                                                         | 1.114  | 0.741 | 2.150  | 0.001 | 0.871  | 0.264 | 1.686  | 0.014 |
| 1398864_at   | BM389287  | ubiquitin-conjugating enzyme E2G 1 (UBC7 homolog, C. elegans)                                                                                                                                                                                                                                                                                                                                                                     | Ube2g1                                                                                        | 0.750  | 0.364 | 1.437  | 0.049 | 0.843  | 0.030 | 1.553  | 0.067 |
| 1370501_at   | AF099093  | ubiquitin-conjugating enzyme E2G 1 (UBC7 homolog, C. elegans)                                                                                                                                                                                                                                                                                                                                                                     | Ube2g1                                                                                        | 0.998  | 0.965 | 1.258  | 0.360 | 1.002  | 0.970 | 1.112  | 0.578 |
| 1371814_at   | BI282191  | ubiquitin-conjugating enzyme E2G 2 (predicted)                                                                                                                                                                                                                                                                                                                                                                                    | Ube2g2_predicted                                                                              | 1.478  | 0.257 | 1.590  | 0.130 | 1.618  | 0.028 | 1.270  | 0.810 |
| 1370250_at   | AA799453  | ubiquitin-conjugating enzyme E2I /// similar to RIKEN cDNA A930001M12 gene (predicted)                                                                                                                                                                                                                                                                                                                                            | Ube2i ///<br>RGD1562567_predicted                                                             | 0.823  | 0.144 | 1.319  | 0.101 | 0.841  | 0.182 | 0.967  | 0.938 |
| 1371945_at   | AI407788  | ubiquitin-conjugating enzyme E2L 3 (predicted)                                                                                                                                                                                                                                                                                                                                                                                    | Ube2l3_predicted                                                                              | 0.777  | 0.718 | 0.642  | 0.017 | 0.648  | 0.869 | 0.751  | 0.025 |
| 1371944_at   | BF282658  | ubiquitin-conjugating enzyme E2L 3 (predicted)                                                                                                                                                                                                                                                                                                                                                                                    | Ube2l3_predicted                                                                              | 0.857  | 0.793 | 1.365  | 0.029 | 0.716  | 0.140 | 1.374  | 0.050 |
| 1373037_at   | BI279216  | ubiquitin-conjugating enzyme E2L 6                                                                                                                                                                                                                                                                                                                                                                                                | Ube2l6                                                                                        | 12.825 | 0.005 | 15.099 | 0.002 | 18.341 | 0.000 | 17.630 | 0.001 |
| 1388559_at   | BG378098  | ubiquitin-conjugating enzyme E2M (UBC12 homolog, yeast) (predicted)                                                                                                                                                                                                                                                                                                                                                               | Ube2m_predicted                                                                               | 0.585  | 0.306 | 1.187  | 0.413 | 0.412  | 0.224 | 0.864  | 0.048 |
| 1369617_at   | NM_053928 | ubiquitin-conjugating enzyme E2N                                                                                                                                                                                                                                                                                                                                                                                                  | Ube2n                                                                                         | 0.757  | 0.050 | 0.908  | 0.074 | 0.559  | 0.111 | 0.601  | 0.076 |
| 1376213_at   | AI007838  | Ubiquitin-conjugating enzyme E2N                                                                                                                                                                                                                                                                                                                                                                                                  | Ube2n                                                                                         | 0.554  | 0.136 | 0.602  | 0.583 | 0.444  | 0.305 | 0.694  | 0.196 |
| 1399143_at   | BI294702  | ubiquitin-conjugating enzyme E2N                                                                                                                                                                                                                                                                                                                                                                                                  | Ube2n                                                                                         | 0.814  | 0.470 | 1.093  | 0.457 | 0.730  | 0.171 | 0.984  | 0.903 |
| 1372788_at   | AI144725  | ubiquitin-conjugating enzyme E2Q (putative) (predicted)                                                                                                                                                                                                                                                                                                                                                                           | Ube2q_predicted                                                                               | 0.830  | 0.038 | 0.596  | 0.002 | 0.802  | 0.053 | 0.641  | 0.008 |
| 1375162_at   | AA800501  | ubiquitin-conjugating enzyme E2Q (putative) (predicted)                                                                                                                                                                                                                                                                                                                                                                           | Ube2q_predicted                                                                               | 0.771  | 0.410 | 1.143  | 0.182 | 0.736  | 0.030 | 1.046  | 0.618 |
| 1393072_at   | H32128    | ubiquitin-conjugating enzyme E2Q (putative) 2 (predicted)                                                                                                                                                                                                                                                                                                                                                                         | Ube2q2_predicted                                                                              | 0.822  | 0.322 | 1.234  | 0.194 | 0.507  | 0.023 | 0.847  | 0.123 |
| 1372703_at   | BG380680  | ubiquitin-conjugating enzyme E2R 2 (predicted)                                                                                                                                                                                                                                                                                                                                                                                    | Ube2r2_predicted                                                                              | 0.856  | 0.069 | 1.315  | 0.035 | 0.742  | 0.133 | 1.130  | 0.533 |
| 1377677_a_at | AA900692  | Ubiquitin-conjugating enzyme E2R 2 (predicted)                                                                                                                                                                                                                                                                                                                                                                                    | Ube2r2_predicted                                                                              | 1.391  | 0.522 | 1.031  | 0.858 | 1.416  | 0.229 | 1.041  | 0.783 |
| 1371365_at   | BI279788  | ubiquitin-conjugating enzyme E2S (predicted)                                                                                                                                                                                                                                                                                                                                                                                      | Ube2s_predicted                                                                               | 0.498  | 0.283 | 0.781  | 0.085 | 0.472  | 0.006 | 0.780  | 0.156 |
| 1388787_at   | BM383736  | ubiquitin-conjugating enzyme E2Z (putative)                                                                                                                                                                                                                                                                                                                                                                                       | Ube2z                                                                                         | 1.437  | 0.135 | 1.485  | 0.010 | 1.133  | 0.808 | 1.489  | 0.008 |
| 1371830_at   | BM986263  | ubiquitin-like 1 (sentrin) activating enzyme E1A                                                                                                                                                                                                                                                                                                                                                                                  | Uble1a                                                                                        | 0.678  | 0.320 | 1.007  | 0.366 | 0.673  | 0.034 | 1.121  | 0.424 |
| 1376212_at   | AI102437  | ubiquitin-like 1 (sentrin) activating enzyme E1B                                                                                                                                                                                                                                                                                                                                                                                  | Uble1b                                                                                        | 1.714  | 0.034 | 4.465  | 0.002 | 0.747  | 0.463 | 3.076  | 0.005 |
| 1371657_at   | AA799692  | ubiquitin-like 1 (sentrin) activating enzyme E1B                                                                                                                                                                                                                                                                                                                                                                                  | Uble1b                                                                                        | 0.752  | 0.255 | 0.910  | 0.121 | 0.750  | 0.080 | 0.870  | 0.083 |
| 1374413_at   | BM386522  | ubiquitin-like 3                                                                                                                                                                                                                                                                                                                                                                                                                  | Ubl3                                                                                          | 0.908  | 0.912 | 1.080  | 0.057 | 0.901  | 0.861 | 1.115  | 0.092 |
| 1383223_at   | BG672206  | ubiquitin-like 3                                                                                                                                                                                                                                                                                                                                                                                                                  | Ubl3                                                                                          | 1.374  | 0.921 | 0.956  | 0.662 | 1.113  | 0.577 | 0.676  | 0.746 |
| 1392906_at   | AW528860  | ubiquitin-like 4a (predicted)                                                                                                                                                                                                                                                                                                                                                                                                     | Ubl4a_predicted                                                                               | 0.596  | 0.224 | 3.173  | 0.012 | 0.319  | 0.011 | 2.311  | 0.097 |
| 1371590_s_at | BM386159  | Ubiquitin-Like 5 Protein                                                                                                                                                                                                                                                                                                                                                                                                          | LOC500954                                                                                     | 1.107  | 0.774 | 0.761  | 0.083 | 1.042  | 0.176 | 0.699  | 0.315 |
| 1371589_at   | BM386159  | Ubiquitin-Like 5 Protein                                                                                                                                                                                                                                                                                                                                                                                                          | LOC500954                                                                                     | 1.018  | 0.846 | 0.989  | 0.569 | 1.033  | 0.616 | 0.757  | 0.133 |
| 1372540_at   | BG671872  | ubiquitin-like domain containing CTD phosphatase 1                                                                                                                                                                                                                                                                                                                                                                                | Ublcp1                                                                                        | 0.850  | 0.051 | 0.507  | 0.002 | 1.134  | 0.485 | 0.734  | 0.057 |
| 1373117_at   | BI275765  | ubiquitin-like, containing PHD and RING finger domains 2 (predicted)                                                                                                                                                                                                                                                                                                                                                              | Uhrf2_predicted                                                                               | 1.054  | 0.796 | 0.974  | 0.779 | 0.839  | 0.198 | 1.142  | 0.102 |
| 1374465_at   | AI237098  | ubiquitously expressed transcript                                                                                                                                                                                                                                                                                                                                                                                                 | Uxt                                                                                           | 0.505  | 0.121 | 0.826  | 0.379 | 0.739  | 0.116 | 0.717  | 0.292 |
| 1388444_at   | BI291633  | UBX domain containing 2                                                                                                                                                                                                                                                                                                                                                                                                           | Ubx2                                                                                          | 0.778  | 0.023 | 1.738  | 0.000 | 0.754  | 0.014 | 1.355  | 0.001 |
| 1381542_at   | AI704885  | UBX domain containing 2                                                                                                                                                                                                                                                                                                                                                                                                           | Ubx2                                                                                          | 0.579  | 0.201 | 1.970  | 0.127 | 0.514  | 0.039 | 1.338  | 0.889 |
| 1396102_at   | BF406574  | UBX domain containing 2                                                                                                                                                                                                                                                                                                                                                                                                           | Ubx2                                                                                          | 1.543  | 0.355 | 1.755  | 0.034 | 1.390  | 0.819 | 1.383  | 0.096 |
| 1396059_at   | BF289251  | UBX domain containing 2                                                                                                                                                                                                                                                                                                                                                                                                           | Ubx2                                                                                          | 0.662  | 0.761 | 2.821  | 0.017 | 0.634  | 0.389 | 1.515  | 0.145 |
| 1382067_at   | AW434917  | UBX domain containing 4 (predicted)                                                                                                                                                                                                                                                                                                                                                                                               | Ubx4_predicted                                                                                | 1.300  | 0.353 | 1.875  | 0.025 | 0.878  | 0.773 | 1.620  | 0.038 |
| 1390785_at   | AI232339  | UBX domain containing 4 (predicted)                                                                                                                                                                                                                                                                                                                                                                                               | Ubx4_predicted                                                                                | 0.777  | 0.383 | 1.285  | 0.018 | 0.736  | 0.010 | 1.346  | 0.018 |
| 1397349_at   | BF394199  | UBX domain containing 6 (predicted)                                                                                                                                                                                                                                                                                                                                                                                               | Ubx6_predicted                                                                                | 1.342  | 0.462 | 2.581  | 0.077 | 0.874  | 0.696 | 2.146  | 0.007 |
| 1383070_at   | AA925934  | UBX domain containing 8                                                                                                                                                                                                                                                                                                                                                                                                           | Ubx8                                                                                          | 0.680  | 0.383 | 0.526  | 0.004 | 0.918  | 0.996 | 0.545  | 0.078 |
| 1380555_at   | BI293042  | UBX domain containing 8                                                                                                                                                                                                                                                                                                                                                                                                           | Ubx8                                                                                          | 0.455  | 0.429 | 0.461  | 0.004 | 1.074  | 0.744 | 0.494  | 0.074 |
| 1383267_at   | BF554347  | UBX domain containing 8                                                                                                                                                                                                                                                                                                                                                                                                           | Ubx8                                                                                          | 0.730  | 0.459 | 0.425  | 0.000 | 0.973  | 0.796 | 0.702  | 0.010 |
| 1368858_at   | L21698    | UDP galactosyltransferase 8                                                                                                                                                                                                                                                                                                                                                                                                       | Ugt8                                                                                          | 0.271  | 0.003 | 0.194  | 0.007 | 0.342  | 0.008 | 0.232  | 0.005 |
| 1369850_at   | NM_022228 | UDP glucuronosyltransferase 2 family, polypeptide A1                                                                                                                                                                                                                                                                                                                                                                              | Ugt2a1                                                                                        | 1.014  | 0.938 | 0.999  | 0.608 | 0.999  | 0.802 | 1.002  | 0.713 |
| 1387759_s_at | J02612    | UDP glycosyltransferase 1 family, polypeptide A1 /// UDP glycosyltransferase 1 family, polypeptide A6 /// UDP glycosyltransferase 1 family, polypeptide A7 /// UDP glycosyltransferase 1 family, polypeptide A8 /// UDP glycosyltransferase 1 family polypeptide A2 /// UDP glycosyltransferase 1 family polypeptide A3 /// UDP glycosyltransferase 1 family polypeptide A10 /// UDP glycosyltransferase 1 family, polypeptide A5 | Ugt1a1 /// Ugt1a6 /// Ugt1a7<br>/// Ugt1a8 /// Ugt1a2 ///<br>Ugt1a3 /// Ugt1a10 ///<br>Ugt1a5 | 0.725  | 0.008 | 1.067  | 0.274 | 0.594  | 0.021 | 0.998  | 0.928 |
| 1370613_s_at | AF461738  | UDP glycosyltransferase 1 family, polypeptide A1 /// UDP glycosyltransferase 1 family, polypeptide A6 /// UDP glycosyltransferase 1 family, polypeptide A7 /// UDP glycosyltransferase 1 family, polypeptide A8 /// UDP glycosyltransferase 1 family polypeptide A2 /// UDP glycosyltransferase 1 family polypeptide A3 /// UDP glycosyltransferase 1 family polypeptide A10 /// UDP glycosyltransferase 1 family, polypeptide A5 | Ugt1a1 /// Ugt1a6 /// Ugt1a7<br>/// Ugt1a8 /// Ugt1a2 ///<br>Ugt1a3 /// Ugt1a10 ///<br>Ugt1a5 | 0.723  | 0.014 | 1.366  | 0.077 | 0.516  | 0.001 | 0.913  | 0.288 |

|              |           |                                                                                                |                  |       |       |       |       |       |       |       |       |
|--------------|-----------|------------------------------------------------------------------------------------------------|------------------|-------|-------|-------|-------|-------|-------|-------|-------|
| 1398373_at   | AA799400  | UDP-Gal:betaGlcNAc beta 1,3-galactosyltransferase, polypeptide 3                               | B3galt3          | 2.339 | 0.001 | 3.444 | 0.002 | 1.295 | 0.074 | 2.030 | 0.023 |
| 1368346_at   | NM_133553 | UDP-Gal:betaGlcNAc beta 1,3-galactosyltransferase, polypeptide 4                               | B3galt4          | 0.407 | 0.058 | 0.559 | 0.033 | 0.744 | 0.363 | 0.476 | 0.014 |
| 1371073_at   | BI286141  | UDP-Gal:betaGlcNAc beta 1,4- galactosyltransferase, polypeptide 1 (mapped)                     | B4galt1_mapped   | 1.141 | 0.367 | 1.148 | 0.279 | 1.322 | 0.097 | 1.102 | 0.302 |
| 1367487_at   | BG378610  | UDP-Gal:betaGlcNAc beta 1,4-galactosyltransferase, polypeptide 3                               | B4galt3          | 0.796 | 0.771 | 0.933 | 0.110 | 1.017 | 0.936 | 0.847 | 0.235 |
| 1383689_at   | BM382871  | UDP-Gal:betaGlcNAc beta 1,4-galactosyltransferase, polypeptide 4                               | B4galt4          | 1.170 | 0.354 | 1.968 | 0.249 | 0.712 | 0.340 | 0.764 | 0.666 |
| 1387206_at   | NM_031740 | UDP-Gal:betaGlcNAc beta 1,4-galactosyltransferase, polypeptide 6                               | B4galt6          | 1.638 | 0.011 | 0.397 | 0.000 | 1.864 | 0.017 | 0.392 | 0.009 |
| 1381877_at   | AI113234  | UDP-Gal:betaGlcNAc beta 1,4-galactosyltransferase, polypeptide 6                               | B4galt6          | 0.908 | 0.158 | 1.000 | 0.987 | 1.953 | 0.196 | 1.048 | 0.756 |
| 1376202_at   | BF416236  | UDP-GlcNAc:betaGal beta-1,3-N-acetylglucosaminyltransferase 6 (predicted)                      | B3gnt6_predicted | 0.209 | 0.001 | 0.290 | 0.009 | 0.087 | 0.008 | 0.504 | 0.488 |
| 1384083_at   | AW532159  | UDP-GlcNAc:betaGal beta-1,3-N-acetylglucosaminyltransferase-like 1                             | B3gnt1           | 0.614 | 0.065 | 0.691 | 0.150 | 0.477 | 0.053 | 0.694 | 0.137 |
| 1387975_at   | AF047707  | UDP-glucose ceramide glucosyltransferase                                                       | Ugcg             | 1.068 | 0.311 | 0.764 | 0.064 | 1.107 | 0.481 | 0.796 | 0.094 |
| 1368953_at   | NM_133596 | UDP-glucose ceramide glucosyltransferase-like 1                                                | Ugcgl1           | 0.891 | 0.822 | 0.991 | 0.116 | 0.882 | 0.329 | 0.751 | 0.049 |
| 1367938_at   | NM_031325 | UDP-glucose dehydrogenase                                                                      | Ugdh             | 2.108 | 0.001 | 4.470 | 0.000 | 2.136 | 0.003 | 3.727 | 0.000 |
| 1388410_at   | AI170679  | UDP-glucose pyrophosphorylase 2                                                                | Ugp2             | 1.300 | 0.483 | 1.818 | 0.003 | 1.069 | 0.769 | 1.936 | 0.004 |
| 1376262_at   | BM385390  | UDP-glucuronate decarboxylase 1                                                                | Uxs1             | 0.945 | 0.483 | 0.877 | 0.067 | 0.690 | 0.063 | 0.902 | 0.433 |
| 1369269_at   | NM_024373 | UDP-N-acetyl-alpha-D-galactosamine:polypeptide N-acetylglucosaminyltransferase 1               | Galnt1           | 1.014 | 0.861 | 0.946 | 0.523 | 0.998 | 0.907 | 0.845 | 0.391 |
| 1383374_at   | BE111170  | UDP-N-acetyl-alpha-D-galactosamine:polypeptide N-acetylglucosaminyltransferase 1               | Galnt1           | 0.931 | 0.875 | 0.866 | 0.998 | 1.149 | 0.635 | 0.656 | 0.192 |
| 1399045_at   | AI236745  | UDP-N-acetyl-alpha-D-galactosamine:polypeptide N-acetylglucosaminyltransferase 1               | Galnt1           | 0.737 | 0.965 | 0.832 | 0.724 | 0.947 | 0.797 | 0.559 | 0.094 |
| 1374624_at   | AI179979  | UDP-N-acetyl-alpha-D-galactosamine:polypeptide N-acetylglucosaminyltransferase 11 (GalNAc-T11) | Galnt11          | 0.765 | 0.087 | 0.827 | 0.271 | 0.893 | 0.582 | 0.743 | 0.072 |
| 1383021_at   | AI103845  | UDP-N-acetyl-alpha-D-galactosamine:polypeptide N-acetylglucosaminyltransferase 13              | Galnt13          | 0.960 | 0.943 | 1.448 | 0.100 | 1.341 | 0.149 | 1.240 | 0.061 |
| 1382355_at   | BM386420  | UDP-N-acetyl-alpha-D-galactosamine:polypeptide N-acetylglucosaminyltransferase 4 (GalNAc-T4)   | Galnt4           | 0.990 | 0.879 | 0.378 | 0.240 | 0.972 | 0.726 | 0.930 | 0.825 |
| 1387554_at   | NM_031796 | UDP-N-acetyl-alpha-D-galactosamine:polypeptide N-acetylglucosaminyltransferase 5               | Galnt5           | 0.528 | 0.099 | 0.248 | 0.001 | 1.000 | 1.000 | 0.306 | 0.004 |
| 1397406_at   | BF411788  | UDP-N-actylglucosamine pyrophosphorylase 1-like 1 (predicted)                                  | Uap111_predicted | 0.701 | 0.392 | 1.929 | 0.045 | 0.627 | 0.007 | 0.953 | 0.968 |
| 1381982_at   | BF403568  | UDP-N-actylglucosamine pyrophosphorylase 1-like 1 (predicted)                                  | Uap111_predicted | 0.479 | 0.512 | 8.860 | 0.004 | 0.261 | 0.018 | 3.758 | 0.016 |
| 1371758_at   | BM986259  | Ufm1-conjugating enzyme 1                                                                      | Ufc1             | 0.718 | 0.103 | 1.061 | 0.768 | 0.769 | 0.070 | 1.007 | 0.922 |
| 1375572_at   | BE100602  | Ultraviolet B radiation-activated UV98 mRNA, partial sequence                                  | ---              | 0.853 | 0.352 | 0.888 | 0.582 | 0.854 | 0.330 | 0.974 | 0.579 |
| 1372679_at   | BI296209  | unc-45 homolog A (C. elegans)                                                                  | Unc45a           | 1.143 | 0.028 | 1.346 | 0.002 | 1.370 | 0.048 | 1.262 | 0.058 |
| 1393799_at   | BI303989  | Unc-5 homolog B (C. elegans)                                                                   | Unc5b            | 0.974 | 0.993 | 1.312 | 0.142 | 0.999 | 0.997 | 1.013 | 0.924 |
| 1384506_at   | H33706    | unc-5 homolog C (C. elegans)                                                                   | Unc5c            | 7.759 | 0.001 | 1.790 | 0.166 | 8.699 | 0.008 | 4.038 | 0.036 |
| 1382201_at   | AA926250  | unc-5 homolog C (C. elegans)                                                                   | Unc5c            | 1.489 | 0.416 | 0.330 | 0.003 | 2.824 | 0.049 | 0.738 | 0.368 |
| 1398865_at   | U96638    | unc-50 homolog (C. elegans)                                                                    | Unc50            | 0.504 | 0.288 | 0.483 | 0.014 | 0.554 | 0.051 | 0.546 | 0.014 |
| 1382671_at   | AW920165  | Unc-51 like kinase 2 (C. elegans) (predicted)                                                  | Ulk2_predicted   | 1.233 | 0.406 | 0.929 | 0.679 | 1.101 | 0.321 | 0.995 | 0.738 |
| 1375869_at   | AI603439  | unc-51-like kinase 1 (mapped)                                                                  | Ulk1_mapped      | 0.579 | 0.048 | 0.216 | 0.047 | 0.798 | 0.107 | 0.370 | 0.042 |
| 1375814_at   | BG380887  | Unc-84 homolog A (C. elegans)                                                                  | Unc84a           | 2.410 | 0.003 | 0.510 | 0.706 | 2.149 | 0.004 | 0.493 | 0.914 |
| 1382043_at   | AI234533  | unc-93 homolog B1 (C. elegans)                                                                 | Unc93b1          | 1.259 | 0.124 | 1.037 | 0.693 | 3.960 | 0.003 | 1.516 | 0.190 |
| 1398962_at   | BM388453  | uncharacterized protein family UPF0227 member RGD1359682                                       | RGD1359682       | 0.541 | 0.117 | 1.125 | 0.063 | 0.297 | 0.057 | 1.037 | 0.209 |
| 1368669_at   | NM_019354 | uncoupling protein 2 (mitochondrial, proton carrier)                                           | Ucp2             | 0.661 | 0.256 | 0.370 | 0.001 | 0.406 | 0.007 | 0.367 | 0.011 |
| 1387681_at   | U92069    | uncoupling protein 3 (mitochondrial, proton carrier)                                           | Ucp3             | 1.169 | 0.709 | 0.928 | 0.964 | 1.068 | 0.579 | 0.995 | 0.935 |
| 1388980_at   | BG381728  | Unknown (protein for MGC:72560)                                                                | MGC72560         | 0.997 | 0.978 | 2.657 | 0.013 | 0.732 | 0.242 | 2.169 | 0.006 |
| 1372961_at   | BE101165  | Unknown (protein for MGC:72996)                                                                | MGC72996         | 0.703 | 0.825 | 1.353 | 0.093 | 0.687 | 0.123 | 1.026 | 0.878 |
| 1372541_at   | BG374849  | Unknown (protein for MGC:73003)                                                                | MGC73003         | 0.962 | 0.229 | 0.997 | 0.983 | 0.967 | 0.275 | 0.828 | 0.092 |
| 1371652_at   | BF550566  | Unknown mRNA sequence                                                                          | ---              | 1.500 | 0.057 | 0.987 | 0.855 | 2.082 | 0.054 | 1.157 | 0.734 |
| 1371091_at   | BE118080  | unknown protein                                                                                | LOC207125        | 0.296 | 0.028 | 0.908 | 0.492 | 0.205 | 0.011 | 0.735 | 0.097 |
| 1378275_at   | BG377170  | UPF3 regulator of nonsense transcripts homolog A (yeast)                                       | Upf3a            | 0.910 | 0.464 | 0.971 | 0.931 | 0.741 | 0.205 | 0.722 | 0.060 |
| 1376298_at   | AW525099  | UPF3 regulator of nonsense transcripts homolog B (yeast) (predicted)                           | Upf3b_predicted  | 0.753 | 0.038 | 0.637 | 0.032 | 1.037 | 0.360 | 0.650 | 0.050 |
| 1371131_a_at | U30789    | upregulated by 1,25-dihydroxyvitamin D-3                                                       | Txnip            | 0.232 | 0.006 | 0.201 | 0.018 | 0.297 | 0.024 | 0.388 | 0.074 |
| 1370238_at   | AA891707  | upregulated during skeletal muscle growth 5                                                    | Usmg5            | 0.989 | 0.784 | 1.168 | 0.189 | 0.756 | 0.130 | 1.154 | 0.542 |
| 1395298_at   | AI070708  | upstream binding protein 1 (predicted)                                                         | Ubp1_predicted   | 0.955 | 0.687 | 0.905 | 0.734 | 1.004 | 0.410 | 0.660 | 0.204 |
| 1389098_at   | AI407261  | Upstream binding protein 1 (predicted)                                                         | Ubp1_predicted   | 1.028 | 0.918 | 0.971 | 0.528 | 1.676 | 0.193 | 1.088 | 0.066 |
| 1371187_a_at | M61726    | upstream binding transcription factor, RNA polymerase I                                        | Ubtf             | 1.151 | 0.618 | 1.216 | 0.074 | 0.724 | 0.094 | 0.951 | 0.991 |
| 1389830_at   | AI105117  | upstream binding transcription factor, RNA polymerase I                                        | Ubtf             | 1.001 | 0.983 | 1.151 | 0.977 | 0.999 | 0.985 | 1.054 | 0.986 |
| 1397961_x_at | AI010663  | upstream of NRAS                                                                               | Unr              | 1.383 | 0.259 | 0.945 | 0.034 | 1.012 | 0.820 | 0.707 | 0.006 |
| 1370169_at   | BI289608  | upstream of NRAS                                                                               | Unr              | 0.979 | 0.262 | 2.154 | 0.001 | 0.716 | 0.550 | 1.830 | 0.022 |
| 1387863_at   | BE099415  | upstream of NRAS                                                                               | Unr              | 0.990 | 0.910 | 1.098 | 0.166 | 0.996 | 0.346 | 1.000 | 0.997 |
| 1376954_at   | BF406210  | Upstream transcription factor 2                                                                | Usf2             | 1.000 | 0.139 | 1.478 | 0.114 | 1.001 | 0.994 | 1.006 | 0.752 |
| 1388088_a_at | AB035650  | upstream transcription factor 2                                                                | Usf2             | 0.992 | 0.850 | 1.999 | 0.096 | 0.995 | 0.959 | 1.403 | 0.368 |
| 1368591_at   | NM_031139 | upstream transcription factor 2                                                                | Usf2             | 0.982 | 0.873 | 1.282 | 0.126 | 1.129 | 0.486 | 1.320 | 0.036 |
| 1389738_at   | AA848420  | uracil-DNA glycosylase                                                                         | Ung              | 0.771 | 0.019 | 2.382 | 0.002 | 0.748 | 0.045 | 1.455 | 0.014 |
| 1368245_at   | NM_053845 | ureidopropionase, beta                                                                         | Upb1             | 0.703 | 0.015 | 0.115 | 0.001 | 0.907 | 0.143 | 0.229 | 0.009 |
| 1383945_at   | AA859827  | uridine monophosphate kinase (predicted)                                                       | Umpk_predicted   | 0.869 | 0.133 | 9.546 | 0.006 | 0.375 | 0.038 | 6.390 | 0.025 |
| 1389587_at   | BM384966  | uridine monophosphate synthetase                                                               | Umps             | 0.457 | 0.011 | 1.568 | 0.003 | 0.352 | 0.001 | 1.068 | 0.516 |
| 1391109_x_at | BE108349  | Urinary protein 2                                                                              | Rup2             | 1.228 | 0.987 | 0.795 | 0.138 | 1.310 | 0.322 | 1.052 | 0.171 |

|              |           |                                                                        |                  |       |       |        |       |        |       |        |       |
|--------------|-----------|------------------------------------------------------------------------|------------------|-------|-------|--------|-------|--------|-------|--------|-------|
| 1370878_at   | Y00350    | uroporphyrinogen decarboxylase                                         | Urod             | 0.458 | 0.191 | 0.524  | 0.011 | 0.417  | 0.012 | 0.473  | 0.088 |
| 1383214_at   | AI555989  | USP6 N-terminal like (predicted)                                       | Usp6nl_predicted | 1.278 | 0.588 | 3.182  | 0.014 | 1.817  | 0.663 | 1.050  | 0.440 |
| 1383250_at   | BE105819  | UTP14, U3 small nucleolar ribonucleoprotein, homolog A (yeast)         | Utp14a           | 0.970 | 0.618 | 2.024  | 0.067 | 0.763  | 0.248 | 1.726  | 0.163 |
| 1377377_at   | BF415808  | Utrophin                                                               | Utrn             | 0.886 | 0.380 | 0.565  | 0.036 | 0.647  | 0.052 | 0.525  | 0.017 |
| 1387716_at   | NM_013070 | utrophin                                                               | Utrn             | 1.012 | 0.528 | 0.999  | 0.980 | 0.745  | 0.100 | 0.975  | 0.789 |
| 1371713_at   | BF408884  | v-abl Abelson murine leukemia viral oncogene homolog 1 (mapped)        | Abl1_mapped      | 0.878 | 0.083 | 1.326  | 0.276 | 0.796  | 0.140 | 0.819  | 0.309 |
| 1389041_at   | BF408597  | Vac14 homolog (S. cerevisiae)                                          | Vac14            | 1.326 | 0.285 | 2.772  | 0.001 | 1.227  | 0.059 | 1.828  | 0.032 |
| 1372419_at   | BG380296  | vaccinia related kinase 3                                              | Vrk3             | 1.194 | 0.114 | 0.850  | 0.089 | 1.618  | 0.039 | 1.262  | 0.069 |
| 1379730_at   | AA942681  | vacuolar ATPase subunit H                                              | Atp6v1h          | 0.653 | 0.271 | 0.826  | 0.036 | 0.711  | 0.046 | 0.780  | 0.014 |
| 1373498_at   | BI295924  | vacuolar protein sorting 11 (yeast) (predicted)                        | Vps11_predicted  | 0.952 | 0.712 | 1.896  | 0.007 | 1.127  | 0.500 | 1.903  | 0.011 |
| 1388934_at   | BI285570  | vacuolar protein sorting 16 (yeast)                                    | Vps16            | 0.863 | 0.562 | 1.929  | 0.002 | 0.990  | 0.967 | 1.395  | 0.004 |
| 1371705_at   | BI285508  | Vacuolar protein sorting 26 (yeast)                                    | Vps26            | 1.120 | 0.135 | 1.741  | 0.007 | 1.256  | 0.126 | 1.241  | 0.007 |
| 1382099_at   | BI289595  | vacuolar protein sorting 26 (yeast)                                    | Vps26            | 1.317 | 0.441 | 1.796  | 0.005 | 1.967  | 0.008 | 1.717  | 0.014 |
| 1367481_at   | BI278301  | vacuolar protein sorting 28 (yeast) (predicted)                        | Vps28_predicted  | 0.809 | 0.788 | 1.066  | 0.716 | 0.926  | 0.597 | 0.816  | 0.423 |
| 1371639_at   | BF291006  | vacuolar protein sorting 29 (S. pombe) (predicted)                     | Vps29_predicted  | 0.715 | 0.025 | 0.739  | 0.095 | 0.717  | 0.005 | 0.812  | 0.338 |
| 1387557_s_at | NM_022961 | vacuolar protein sorting 33A (yeast)                                   | Vps33a           | 0.898 | 0.219 | 0.570  | 0.041 | 0.642  | 0.035 | 0.665  | 0.062 |
| 1370521_at   | U35245    | vacuolar protein sorting 33B (yeast)                                   | Vps33b           | 0.651 | 0.040 | 0.607  | 0.026 | 0.810  | 0.452 | 0.664  | 0.011 |
| 1372806_at   | AA955295  | vacuolar protein sorting 35 (mapped)                                   | Vps35_mapped     | 0.752 | 0.580 | 1.144  | 0.093 | 0.655  | 0.212 | 1.107  | 0.551 |
| 1389191_at   | AA858649  | vacuolar protein sorting 36 (yeast) (predicted)                        | Vps36_predicted  | 0.542 | 0.026 | 1.193  | 0.090 | 1.384  | 0.842 | 1.346  | 0.643 |
| 1374068_at   | BG673672  | vacuolar protein sorting 39 (yeast)                                    | Vps39            | 0.796 | 0.595 | 1.083  | 0.138 | 0.940  | 0.236 | 0.844  | 0.784 |
| 1370549_at   | U81160    | vacuolar protein sorting 45 (yeast)                                    | Vps45            | 0.807 | 0.153 | 0.824  | 0.160 | 0.787  | 0.095 | 0.742  | 0.101 |
| 1372834_at   | BI304063  | vacuolar protein sorting 4b (yeast)                                    | Vps4b            | 0.793 | 0.669 | 1.002  | 0.786 | 0.581  | 0.100 | 0.899  | 0.029 |
| 1374824_at   | BG373086  | vacuolar protein sorting 53 (yeast) (predicted)                        | Vps53_predicted  | 1.095 | 0.716 | 1.124  | 0.658 | 0.937  | 0.684 | 1.281  | 0.047 |
| 1370974_at   | AJ010392  | vacuolar protein sorting 54 (yeast)                                    | Vps54            | 2.347 | 0.006 | 0.919  | 0.472 | 4.345  | 0.001 | 1.353  | 0.082 |
| 1395193_at   | BM384656  | Vacuolar protein sorting 54 (yeast)                                    | Vps54            | 2.351 | 0.078 | 2.310  | 0.133 | 7.351  | 0.002 | 2.490  | 0.178 |
| 1371673_at   | AI413005  | vacuolar protein sorting 72 (yeast) (predicted)                        | Vps72_predicted  | 0.931 | 0.541 | 1.221  | 0.020 | 0.878  | 0.589 | 1.006  | 0.358 |
| 1377849_at   | BI284363  | valosin containing protein (p97)/p47 complex interacting protein 1     | Vcpip1           | 1.861 | 0.013 | 1.830  | 0.073 | 2.465  | 0.007 | 1.650  | 0.131 |
| 1390858_at   | BM383657  | valosin containing protein (p97)/p47 complex interacting protein 1     | Vcpip1           | 1.301 | 0.068 | 1.179  | 0.529 | 1.410  | 0.030 | 1.053  | 0.647 |
| 1367455_at   | NM_053864 | valosin-containing protein                                             | Vcp              | 0.608 | 0.280 | 0.779  | 0.011 | 0.890  | 0.386 | 0.880  | 0.057 |
| 1372578_at   | AI704469  | valyl-tRNA synthetase 2                                                | Vars2            | 1.829 | 0.025 | 2.923  | 0.000 | 1.887  | 0.019 | 2.381  | 0.001 |
| 1385661_at   | BG057536  | valyl-tRNA synthetase 2                                                | Vars2            | 0.897 | 0.050 | 1.040  | 0.439 | 0.698  | 0.054 | 1.094  | 0.122 |
| 1389689_at   | BI276974  | valyl-tRNA synthetase 2-like                                           | Vars2l           | 2.044 | 0.244 | 1.207  | 0.066 | 2.252  | 0.702 | 0.994  | 0.982 |
| 1394435_at   | AI703874  | vang, van gogh-like 1 (Drosophila) (predicted)                         | Vangl1_predicted | 1.277 | 0.180 | 10.610 | 0.001 | 0.792  | 0.750 | 10.233 | 0.001 |
| 1392667_at   | AI070793  | vang-like 2 (van gogh, Drosophila) (predicted)                         | Vangl2_predicted | 0.308 | 0.028 | 0.251  | 0.007 | 0.719  | 0.092 | 0.303  | 0.006 |
| 1375493_at   | BE104373  | vang-like 2 (van gogh, Drosophila) (predicted)                         | Vangl2_predicted | 0.967 | 0.969 | 0.188  | 0.041 | 0.925  | 0.993 | 0.227  | 0.042 |
| 1389253_at   | BI289085  | vanin 1                                                                | Vnn1             | 0.622 | 0.097 | 0.348  | 0.217 | 0.608  | 0.054 | 0.356  | 0.008 |
| 1368474_at   | NM_012889 | vascular cell adhesion molecule 1                                      | Vcam1            | 3.130 | 0.038 | 2.498  | 0.027 | 34.831 | 0.000 | 28.369 | 0.000 |
| 1370081_a_at | AF080594  | vascular endothelial growth factor A                                   | Vegfa            | 0.851 | 0.773 | 4.375  | 0.045 | 0.317  | 0.067 | 2.682  | 0.267 |
| 1396934_at   | AI410280  | Vascular endothelial growth factor B                                   | Vegfb            | 0.960 | 0.695 | 1.853  | 0.035 | 0.930  | 0.043 | 0.946  | 0.275 |
| 1371581_at   | BM388899  | Vascular endothelial zinc finger 1 (predicted)                         | VeZF1_predicted  | 0.615 | 0.003 | 1.040  | 0.244 | 0.694  | 0.016 | 1.025  | 0.410 |
| 1374072_at   | AI010272  | Vascular endothelial zinc finger 1 (predicted)                         | VeZF1_predicted  | 0.682 | 0.034 | 0.466  | 0.034 | 0.875  | 0.093 | 0.768  | 0.105 |
| 1377806_at   | BF556273  | vascular endothelial zinc finger 1 (predicted)                         | VeZF1_predicted  | 1.730 | 0.060 | 0.829  | 0.045 | 1.235  | 0.064 | 0.941  | 0.144 |
| 1393784_at   | BI284190  | vascular endothelial zinc finger 1 (predicted)                         | VeZF1_predicted  | 1.781 | 0.115 | 0.336  | 0.159 | 1.932  | 0.281 | 0.779  | 0.805 |
| 1376594_at   | AW524517  | vascular endothelial zinc finger 1 (predicted)                         | VeZF1_predicted  | 1.731 | 0.145 | 3.160  | 0.004 | 1.450  | 0.051 | 3.436  | 0.020 |
| 1383537_at   | BF522715  | Vascular endothelial zinc finger 1 (predicted)                         | VeZF1_predicted  | 1.840 | 0.235 | 1.675  | 0.006 | 1.787  | 0.031 | 1.796  | 0.009 |
| 1395103_at   | BF397372  | Vascular endothelial zinc finger 1 (predicted)                         | VeZF1_predicted  | 1.116 | 0.976 | 1.194  | 0.253 | 1.119  | 0.996 | 1.068  | 0.689 |
| 1387177_at   | NM_017238 | vasoactive intestinal peptide receptor 2                               | Vipr2            | 0.349 | 0.002 | 0.132  | 0.002 | 0.360  | 0.052 | 0.111  | 0.003 |
| 1372459_at   | AW520792  | vasodilator-stimulated phosphoprotein (predicted)                      | Vasp_predicted   | 1.396 | 0.019 | 1.268  | 0.006 | 1.090  | 0.020 | 1.200  | 0.010 |
| 1395605_at   | BM384452  | v-crK sarcoma virus CT10 oncogene homolog (avian)-like                 | Crkl             | 0.989 | 0.968 | 4.107  | 0.012 | 0.995  | 0.987 | 3.118  | 0.096 |
| 1394539_at   | BF413362  | Ventral anterior homeobox 2                                            | Vax2             | 1.092 | 0.976 | 0.495  | 0.060 | 1.064  | 0.956 | 0.669  | 0.081 |
| 1369098_at   | NM_013155 | very low density lipoprotein receptor                                  | Vldlr            | 1.074 | 0.337 | 2.097  | 0.010 | 0.657  | 0.093 | 1.699  | 0.038 |
| 1387455_a_at | NM_013155 | very low density lipoprotein receptor                                  | Vldlr            | 0.631 | 0.362 | 2.786  | 0.000 | 0.498  | 0.004 | 2.345  | 0.002 |
| 1371432_at   | BI284849  | vesicle amine transport protein 1 homolog (T. californica)             | Vat1             | 1.054 | 0.619 | 2.265  | 0.003 | 0.807  | 0.009 | 1.472  | 0.036 |
| 1367730_at   | NM_019379 | vesicle docking protein                                                | Vdp              | 0.579 | 0.038 | 0.899  | 0.083 | 0.750  | 0.027 | 0.931  | 0.079 |
| 1368889_at   | NM_023101 | vesicle transport through interaction with t-SNAREs homolog 1A (yeast) | Vti1a            | 1.061 | 0.645 | 3.068  | 0.092 | 0.840  | 0.054 | 1.679  | 0.127 |
| 1373510_at   | BF281373  | vesicle-associated membrane protein 1                                  | Vamp1            | 0.592 | 0.088 | 0.623  | 0.024 | 0.600  | 0.094 | 0.645  | 0.040 |
| 1369974_at   | NM_012663 | vesicle-associated membrane protein 2                                  | Vamp2            | 0.307 | 0.140 | 0.345  | 0.009 | 0.327  | 0.069 | 0.263  | 0.001 |
| 1399159_a_at | NM_057097 | vesicle-associated membrane protein 3                                  | Vamp3            | 1.261 | 0.234 | 0.767  | 0.028 | 1.581  | 0.032 | 1.014  | 0.526 |
| 1391494_at   | AW527503  | vesicle-associated membrane protein 4 (predicted)                      | Vamp4_predicted  | 0.486 | 0.237 | 0.745  | 0.023 | 0.571  | 0.093 | 0.828  | 0.116 |
| 1384034_at   | D86817    | vesicle-associated membrane protein 4 (predicted)                      | Vamp4_predicted  | 0.907 | 0.766 | 0.677  | 0.051 | 0.863  | 0.655 | 0.620  | 0.066 |
| 1398840_at   | NM_053555 | vesicle-associated membrane protein 5                                  | Vamp5            | 1.001 | 0.954 | 1.009  | 0.930 | 1.040  | 0.520 | 1.002  | 0.970 |

|              |           |                                                                          |                 |       |       |       |       |       |       |       |       |
|--------------|-----------|--------------------------------------------------------------------------|-----------------|-------|-------|-------|-------|-------|-------|-------|-------|
| 1369970_at   | NM_031827 | vesicle-associated membrane protein 8                                    | Vamp8           | 1.907 | 0.114 | 2.123 | 0.011 | 1.414 | 0.002 | 1.466 | 0.032 |
| 1398843_at   | AI411103  | vesicle-associated membrane protein, associated protein a                | Vapa            | 0.839 | 0.175 | 1.519 | 0.001 | 0.800 | 0.030 | 1.370 | 0.001 |
| 1397977_at   | AI548601  | Vesicle-associated membrane protein, associated protein a                | Vapa            | 0.953 | 0.458 | 1.215 | 0.407 | 1.038 | 0.989 | 1.122 | 0.174 |
| 1390257_at   | BG376956  | vesicle-associated membrane protein, associated protein B and C          | Vapb            | 0.392 | 0.033 | 0.775 | 0.116 | 0.468 | 0.030 | 0.632 | 0.029 |
| 1376893_at   | AI406821  | Vesicular membrane protein p24 (predicted)                               | Vmp_predicted   | 1.240 | 0.043 | 4.899 | 0.001 | 0.687 | 0.005 | 1.530 | 0.157 |
| 1375533_at   | BI289645  | vestigial like 4 (Drosophila)                                            | Vgll4           | 1.041 | 0.402 | 0.841 | 0.099 | 1.033 | 0.856 | 0.771 | 0.038 |
| 1374589_at   | AI235367  | vezatin, adherens junctions transmembrane protein                        | Vezt            | 2.258 | 0.016 | 1.889 | 0.102 | 1.565 | 0.889 | 1.299 | 0.167 |
| 1368359_a_at | NM_030997 | VGF nerve growth factor inducible                                        | Vgf             | 1.941 | 0.009 | 1.615 | 0.085 | 1.900 | 0.004 | 2.016 | 0.034 |
| 1379393_at   | AI231564  | villin 1 (predicted)                                                     | Vil1_predicted  | 1.134 | 0.478 | 0.447 | 0.001 | 0.658 | 0.094 | 0.367 | 0.034 |
| 1370875_at   | AA851304  | villin 2                                                                 | Vil2            | 5.759 | 0.006 | 7.296 | 0.001 | 9.216 | 0.000 | 9.800 | 0.000 |
| 1367574_at   | NM_031140 | vimentin                                                                 | Vim             | 3.782 | 0.002 | 1.759 | 0.025 | 2.506 | 0.043 | 1.676 | 0.038 |
| 1373338_at   | AI175767  | Vimentin-type intermediate filament associated coiled-coil protein       | Vmac            | 0.274 | 0.034 | 0.104 | 0.001 | 0.198 | 0.004 | 0.158 | 0.025 |
| 1368854_at   | AI227991  | visinin-like 1                                                           | Vsnl1           | 0.098 | 0.000 | 0.094 | 0.003 | 0.078 | 0.019 | 0.120 | 0.020 |
| 1368853_at   | NM_012686 | visinin-like 1                                                           | Vsnl1           | 0.506 | 0.286 | 0.039 | 0.001 | 0.684 | 0.385 | 0.059 | 0.001 |
| 1388330_at   | BM384958  | vitamin K epoxide reductase complex, subunit 1                           | Vkorc1          | 0.644 | 0.328 | 0.474 | 0.011 | 0.666 | 0.015 | 0.441 | 0.020 |
| 1393621_at   | AA956405  | vitamin K epoxide reductase complex, subunit 1-like 1                    | Vkorc1l1        | 0.800 | 0.755 | 1.684 | 0.111 | 0.528 | 0.036 | 1.954 | 0.117 |
| 1370035_at   | NM_031515 | v-Ki-ras2 Kirsten rat sarcoma viral oncogene homolog                     | Kras            | 0.935 | 0.806 | 1.146 | 0.400 | 1.013 | 0.921 | 1.058 | 0.468 |
| 1387947_at   | U56241    | v-maf musculoaponeurotic fibrosarcoma oncogene family, protein B (avian) | Mafb            | 1.043 | 0.868 | 1.628 | 0.056 | 0.883 | 0.985 | 0.991 | 0.949 |
| 1372211_at   | BI284461  | v-maf musculoaponeurotic fibrosarcoma oncogene family, protein K (avian) | Mafk            | 2.872 | 0.006 | 4.491 | 0.001 | 2.883 | 0.003 | 4.190 | 0.004 |
| 1385243_at   | AI180340  | V-maf musculoaponeurotic fibrosarcoma oncogene homolog (avian)           | Maf             | 1.495 | 0.364 | 0.998 | 0.554 | 2.057 | 0.034 | 1.365 | 0.282 |
| 1392566_at   | AA957811  | V-maf musculoaponeurotic fibrosarcoma oncogene homolog (avian)           | Maf             | 0.498 | 0.434 | 1.240 | 0.592 | 1.022 | 0.517 | 1.079 | 0.158 |
| 1367706_at   | NM_031353 | voltage-dependent anion channel 1                                        | Vdac1           | 0.763 | 0.013 | 0.860 | 0.013 | 0.668 | 0.000 | 0.890 | 0.116 |
| 1386909_a_at | AF268467  | voltage-dependent anion channel 1                                        | Vdac1           | 0.670 | 0.128 | 0.621 | 0.255 | 0.254 | 0.133 | 0.556 | 0.438 |
| 1380782_at   | AW528654  | Voltage-dependent anion channel 1                                        | Vdac1           | 1.022 | 0.813 | 1.163 | 0.167 | 1.051 | 0.680 | 1.075 | 0.810 |
| 1369933_at   | AF268468  | voltage-dependent anion channel 2                                        | Vdac2           | 0.962 | 0.879 | 1.252 | 0.027 | 0.800 | 0.049 | 0.986 | 0.774 |
| 1386902_at   | NM_031355 | voltage-dependent anion channel 3                                        | Vdac3           | 0.816 | 0.271 | 1.133 | 0.123 | 0.710 | 0.009 | 1.087 | 0.872 |
| 1368076_at   | NM_052801 | von Hippel-Lindau syndrome homolog                                       | Vhl             | 2.414 | 0.042 | 2.575 | 0.000 | 1.981 | 0.046 | 2.374 | 0.003 |
| 1379093_at   | BF404377  | V-raf murine sarcoma 3611 viral oncogene homolog                         | Araf            | 0.752 | 0.025 | 0.759 | 0.914 | 0.757 | 0.360 | 0.945 | 0.845 |
| 1368390_at   | NM_022532 | v-raf murine sarcoma 3611 viral oncogene homolog                         | Araf            | 0.803 | 0.255 | 0.847 | 0.124 | 1.164 | 0.923 | 1.032 | 0.405 |
| 1388305_at   | AI176666  | v-raf murine sarcoma 3611 viral oncogene homolog                         | Araf            | 0.799 | 0.368 | 0.761 | 0.016 | 0.835 | 0.279 | 0.854 | 0.007 |
| 1388818_at   | AA946074  | V-raf murine sarcoma 3611 viral oncogene homolog                         | Araf            | 0.890 | 0.468 | 1.220 | 0.674 | 1.164 | 0.548 | 0.822 | 0.167 |
| 1381099_at   | AI236843  | V-raf murine sarcoma 3611 viral oncogene homolog                         | Araf            | 1.090 | 0.994 | 1.027 | 0.858 | 1.368 | 0.220 | 1.029 | 0.857 |
| 1395554_at   | BF405684  | V-raf-1 murine leukemia viral oncogene homolog 1                         | Raf1            | 0.993 | 0.469 | 0.867 | 0.018 | 0.980 | 0.504 | 0.853 | 0.013 |
| 1369932_a_at | NM_012639 | v-raf-1 murine leukemia viral oncogene homolog 1                         | Raf1            | 0.951 | 0.999 | 1.464 | 0.003 | 0.885 | 0.696 | 1.109 | 0.168 |
| 1368405_at   | NM_031093 | v-ral simian leukemia viral oncogene homolog A (ras related)             | Rala            | 1.544 | 0.288 | 4.162 | 0.000 | 1.173 | 0.048 | 3.669 | 0.000 |
| 1374285_at   | AW531275  | V-ral simian leukemia viral oncogene homolog A (ras related)             | Rala            | 1.002 | 0.996 | 0.611 | 0.004 | 0.998 | 0.244 | 0.768 | 0.039 |
| 1387001_at   | NM_053821 | v-ral simian leukemia viral oncogene homolog B                           | Ralb            | 1.054 | 0.819 | 2.336 | 0.002 | 1.042 | 0.928 | 2.034 | 0.010 |
| 1372853_at   | BF283772  | v-rel reticuloendotheliosis viral oncogene homolog A (avian)             | Rela            | 2.322 | 0.016 | 2.407 | 0.000 | 3.094 | 0.010 | 2.531 | 0.006 |
| 1368432_a_at | NM_012874 | v-ros UR2 sarcoma virus oncogene homolog 1 (avian)                       | Ros1            | 1.068 | 0.825 | 0.499 | 0.193 | 0.811 | 0.866 | 0.852 | 0.710 |
| 1392974_at   | BI295427  | WAS protein family, member 1                                             | Wasf1           | 0.584 | 0.255 | 0.630 | 0.026 | 0.664 | 0.247 | 0.910 | 0.050 |
| 1394935_at   | AI175684  | WAS protein family, member 2                                             | Wasf2           | 1.003 | 0.328 | 5.107 | 0.051 | 1.007 | 0.713 | 1.878 | 0.066 |
| 1376256_at   | BE108131  | WD repeat and FYVE domain containing 1                                   | Wdfy1           | 3.432 | 0.068 | 4.272 | 0.009 | 2.122 | 0.516 | 2.411 | 0.090 |
| 1376448_at   | AI575081  | WD repeat and FYVE domain containing 1                                   | Wdfy1           | 1.270 | 0.258 | 3.906 | 0.012 | 1.407 | 0.872 | 3.022 | 0.018 |
| 1392710_at   | AI101727  | WD repeat and FYVE domain containing 1                                   | Wdfy1           | 0.984 | 0.371 | 2.251 | 0.000 | 1.022 | 0.593 | 1.853 | 0.007 |
| 1372837_at   | BI277033  | WD repeat and FYVE domain containing 2 (predicted)                       | Wdfy2_predicted | 0.823 | 0.044 | 0.850 | 0.399 | 0.385 | 0.178 | 0.811 | 0.274 |
| 1389128_at   | AI146179  | WD repeat and FYVE domain containing 3 (predicted)                       | Wdfy3_predicted | 1.207 | 0.495 | 0.713 | 0.013 | 0.941 | 0.302 | 0.671 | 0.003 |
| 1374204_at   | BM388946  | WD repeat and SOCS box-containing 1                                      | Wsb1            | 1.572 | 0.027 | 2.229 | 0.004 | 1.877 | 0.010 | 1.966 | 0.013 |
| 1372218_at   | BM384448  | WD repeat domain 12                                                      | Wdr12           | 0.594 | 0.042 | 1.399 | 0.021 | 0.567 | 0.016 | 1.199 | 0.046 |
| 1372373_at   | AI713206  | WD repeat domain 13 (predicted)                                          | Wdr13_predicted | 0.720 | 0.131 | 0.576 | 0.035 | 1.236 | 0.980 | 0.695 | 0.477 |
| 1375439_at   | BF417010  | WD repeat domain 18                                                      | Wdr18           | 0.966 | 0.979 | 1.216 | 0.978 | 1.072 | 0.788 | 1.213 | 0.987 |
| 1373084_at   | BI300912  | WD repeat domain 20                                                      | Wdr20           | 0.767 | 0.094 | 0.687 | 0.374 | 0.713 | 0.469 | 1.526 | 0.072 |
| 1390661_at   | BE115928  | WD repeat domain 20                                                      | Wdr20           | 1.211 | 0.507 | 1.961 | 0.076 | 0.701 | 0.635 | 1.560 | 0.051 |
| 1397061_at   | BF394045  | WD repeat domain 22                                                      | Wdr22           | 1.395 | 0.320 | 0.829 | 0.111 | 1.408 | 0.808 | 0.559 | 0.017 |
| 1379084_at   | AW533710  | WD repeat domain 22                                                      | Wdr22           | 1.161 | 0.362 | 2.155 | 0.046 | 0.834 | 0.109 | 1.400 | 0.486 |
| 1389335_at   | BM387479  | WD repeat domain 22                                                      | Wdr22           | 1.001 | 0.674 | 1.068 | 0.414 | 1.025 | 0.522 | 1.419 | 0.086 |
| 1371549_at   | AI228630  | WD repeat domain 23                                                      | Wdr23           | 0.785 | 0.248 | 1.326 | 0.041 | 1.112 | 0.608 | 1.165 | 0.020 |
| 1373938_at   | BF284753  | WD repeat domain 24                                                      | Wdr24           | 0.453 | 0.079 | 1.242 | 0.068 | 0.789 | 0.549 | 1.353 | 0.240 |
| 1374793_at   | BE113663  | WD repeat domain 3 (predicted)                                           | Wdr3_predicted  | 0.389 | 0.009 | 1.919 | 0.008 | 0.823 | 0.131 | 1.583 | 0.007 |
| 1389993_at   | BI299095  | WD repeat domain 33 (predicted)                                          | Wdr33_predicted | 1.183 | 0.174 | 1.150 | 0.330 | 0.897 | 0.771 | 1.251 | 0.048 |
| 1385240_at   | AW523099  | WD repeat domain 33 (predicted)                                          | Wdr33_predicted | 0.780 | 0.677 | 1.065 | 0.830 | 1.990 | 0.252 | 0.943 | 0.668 |
| 1377619_at   | AI407932  | WD repeat domain 36 (predicted)                                          | Wdr36_predicted | 0.674 | 0.104 | 0.775 | 0.209 | 0.339 | 0.040 | 0.951 | 0.188 |

|              |           |                                                                                                                  |                       |       |       |       |       |       |       |       |       |
|--------------|-----------|------------------------------------------------------------------------------------------------------------------|-----------------------|-------|-------|-------|-------|-------|-------|-------|-------|
| 1385804_x_at | AA956841  | WD repeat domain 36 (predicted)                                                                                  | Wdr36_predicted       | 0.788 | 0.628 | 1.567 | 0.053 | 0.594 | 0.011 | 1.186 | 0.200 |
| 1390788_a_at | AI407932  | WD repeat domain 36 (predicted)                                                                                  | Wdr36_predicted       | 0.978 | 0.933 | 1.440 | 0.056 | 0.708 | 0.018 | 1.289 | 0.043 |
| 1390784_at   | BG662814  | WD repeat domain 37 (predicted)                                                                                  | Wdr37_predicted       | 0.420 | 0.013 | 1.431 | 0.554 | 0.480 | 0.032 | 0.806 | 0.480 |
| 1380131_at   | BE116354  | WD repeat domain 37 (predicted)                                                                                  | Wdr37_predicted       | 0.907 | 0.276 | 0.930 | 0.390 | 0.821 | 0.068 | 1.135 | 0.344 |
| 1372245_at   | AA894272  | WD repeat domain 39                                                                                              | Wdr39                 | 0.563 | 0.102 | 0.555 | 0.001 | 0.462 | 0.053 | 0.657 | 0.002 |
| 1395065_at   | AW521367  | WD repeat domain 41 (predicted)                                                                                  | Wdr41_predicted       | 0.710 | 0.061 | 0.860 | 0.387 | 1.318 | 0.709 | 0.844 | 0.350 |
| 1390451_at   | BM390195  | WD repeat domain 41 (predicted)                                                                                  | Wdr41_predicted       | 1.523 | 0.113 | 1.030 | 0.370 | 1.544 | 0.334 | 0.938 | 0.229 |
| 1397843_at   | BG663841  | WD repeat domain 44                                                                                              | Wdr44                 | 0.887 | 0.054 | 0.994 | 0.523 | 0.862 | 0.047 | 0.980 | 0.844 |
| 1393955_at   | BI293101  | WD repeat domain 44                                                                                              | Wdr44                 | 1.376 | 0.103 | 0.603 | 0.023 | 0.962 | 0.075 | 0.748 | 0.026 |
| 1399030_at   | AA800682  | WD repeat domain 45                                                                                              | Wdr45                 | 0.932 | 0.655 | 1.138 | 0.121 | 0.796 | 0.411 | 1.147 | 0.160 |
| 1374152_at   | BF290018  | WD repeat domain 46                                                                                              | Wdr46                 | 0.744 | 0.304 | 0.989 | 0.938 | 1.131 | 0.719 | 1.006 | 0.950 |
| 1372781_at   | BG378912  | WD repeat domain 47                                                                                              | Wdr47                 | 0.876 | 0.447 | 0.305 | 0.004 | 0.859 | 0.548 | 0.546 | 0.018 |
| 1384152_at   | BE101118  | WD repeat domain 48 (predicted)                                                                                  | Wdr48_predicted       | 1.074 | 0.037 | 1.743 | 0.146 | 1.160 | 0.146 | 0.901 | 0.391 |
| 1372388_at   | AI227930  | WD repeat domain 48 (predicted)                                                                                  | Wdr48_predicted       | 1.142 | 0.126 | 0.745 | 0.008 | 0.923 | 0.622 | 0.769 | 0.086 |
| 1388897_at   | BI282734  | WD repeat domain 5                                                                                               | Wdr5                  | 1.045 | 0.540 | 1.369 | 0.140 | 0.674 | 0.127 | 1.108 | 0.495 |
| 1383297_at   | BI275422  | WD repeat domain 5                                                                                               | Wdr5                  | 1.062 | 0.994 | 1.890 | 0.020 | 0.772 | 0.026 | 1.443 | 0.038 |
| 1393043_at   | BM391844  | WD repeat domain 50 (predicted)                                                                                  | Wdr50_predicted       | 0.712 | 0.059 | 1.054 | 0.778 | 0.557 | 0.045 | 0.987 | 0.351 |
| 1397157_at   | BF411716  | WD repeat domain 59                                                                                              | Wdr59                 | 3.575 | 0.022 | 1.994 | 0.062 | 2.675 | 0.058 | 1.146 | 0.027 |
| 1389232_at   | BI296464  | WD repeat domain 5B                                                                                              | Wdr5b                 | 0.858 | 0.274 | 0.839 | 0.212 | 0.932 | 0.717 | 0.687 | 0.286 |
| 1373399_at   | BI291997  | WD repeat domain 6                                                                                               | Wdr6                  | 0.386 | 0.001 | 0.252 | 0.001 | 0.398 | 0.004 | 0.344 | 0.019 |
| 1389323_at   | BF282629  | WD repeat domain 61                                                                                              | Wdr61                 | 0.497 | 0.142 | 0.714 | 0.002 | 0.605 | 0.041 | 0.715 | 0.000 |
| 1373548_at   | BE107518  | WD repeat domain 68 (predicted)                                                                                  | Wdr68_predicted       | 0.687 | 0.324 | 0.677 | 0.039 | 0.794 | 0.042 | 0.752 | 0.646 |
| 1397017_at   | BF400853  | WD repeat domain 7                                                                                               | Wdr7                  | 0.887 | 0.833 | 1.137 | 0.644 | 0.745 | 0.702 | 0.840 | 0.652 |
| 1395058_at   | AI556441  | WD repeat domain 75                                                                                              | Wdr75                 | 0.709 | 0.048 | 0.851 | 0.865 | 0.845 | 0.068 | 0.660 | 0.188 |
| 1391432_at   | BM385275  | WD repeat domain 75                                                                                              | Wdr75                 | 0.692 | 0.074 | 1.078 | 0.765 | 0.961 | 0.135 | 1.063 | 0.688 |
| 1388560_at   | AI412580  | WD repeat domain 77                                                                                              | Wdr77                 | 0.683 | 0.080 | 1.832 | 0.002 | 0.604 | 0.007 | 1.742 | 0.002 |
| 1373694_at   | H33486    | WD repeat domain 79                                                                                              | Wdr79                 | 0.644 | 0.096 | 1.007 | 0.960 | 0.637 | 0.051 | 0.721 | 0.739 |
| 1373270_at   | AI233288  | WD repeat domain, phosphoinositide interacting 1 (predicted)                                                     | Wipi1_predicted       | 1.783 | 0.097 | 0.795 | 0.313 | 1.686 | 0.209 | 0.690 | 0.086 |
| 1389068_at   | BI288819  | WD repeat domain, phosphoinositide interacting 2                                                                 | Wipi2                 | 1.418 | 0.756 | 3.951 | 0.015 | 1.018 | 0.943 | 1.897 | 0.078 |
| 1389520_at   | BI285874  | WD repeat protein 1                                                                                              | Wdr1                  | 1.486 | 0.028 | 1.351 | 0.045 | 1.281 | 0.040 | 1.046 | 0.178 |
| 1392399_at   | BG377835  | WD repeats and SOF domain containing 1 (predicted)                                                               | Wdsof1_predicted      | 0.913 | 0.194 | 1.202 | 0.018 | 0.932 | 0.606 | 1.078 | 0.015 |
| 1383651_a_at | AA964509  | Wdr45 like (predicted)                                                                                           | Wdr45l_predicted      | 0.948 | 0.636 | 1.505 | 0.002 | 1.101 | 0.242 | 1.329 | 0.009 |
| 1397409_s_at | BE113999  | wee 1 homolog (S. pombe)                                                                                         | Wee1                  | 0.983 | 0.250 | 1.887 | 0.019 | 0.543 | 0.017 | 1.884 | 0.029 |
| 1370663_at   | D31838    | wee 1 homolog (S. pombe)                                                                                         | Wee1                  | 1.181 | 0.719 | 1.870 | 0.027 | 0.641 | 0.049 | 1.739 | 0.011 |
| 1389090_at   | BI284350  | Werner helicase interacting protein 1                                                                            | Wrnip1                | 0.929 | 0.675 | 1.441 | 0.010 | 1.007 | 0.700 | 1.620 | 0.110 |
| 1389643_at   | H31790    | widely-interspaced zinc finger motifs (predicted)                                                                | Wiz_predicted         | 1.170 | 0.464 | 1.913 | 0.025 | 1.219 | 0.651 | 1.829 | 0.002 |
| 1387021_at   | NM_022548 | wild-type p53-induced gene 1                                                                                     | Wig1                  | 0.933 | 0.233 | 0.782 | 0.270 | 1.369 | 0.426 | 0.960 | 0.626 |
| 1399083_at   | BF283000  | Williams Beuren syndrome chromosome region 21 /// similar to Williams-Beuren syndrome critical region protein 21 | Wbscr21 /// LOC368083 | 0.729 | 0.376 | 0.993 | 0.872 | 0.692 | 0.132 | 0.982 | 0.739 |
| 1367531_at   | BG666846  | Williams-Beuren syndrome chromosome region 1 homolog (human)                                                     | Wbscr1                | 1.108 | 0.668 | 1.283 | 0.049 | 1.016 | 0.872 | 1.370 | 0.146 |
| 1368614_at   | NM_133552 | Williams-Beuren syndrome chromosome region 14 homolog (human)                                                    | Wbscr14               | 1.233 | 0.155 | 0.447 | 0.000 | 1.679 | 0.128 | 0.410 | 0.082 |
| 1377223_at   | AI599621  | Wilms tumor 1                                                                                                    | Wt1                   | 0.954 | 0.591 | 1.000 | 0.986 | 1.000 | 0.612 | 0.989 | 0.961 |
| 1368641_at   | NM_053402 | wingless-related MMTV integration site 4                                                                         | Wnt4                  | 0.671 | 0.422 | 0.569 | 0.650 | 0.580 | 0.304 | 0.320 | 0.075 |
| 1376063_at   | AI599019  | wingless-related MMTV integration site 6 (predicted)                                                             | Wnt6_predicted        | 1.001 | 0.386 | 0.986 | 0.685 | 0.849 | 0.342 | 0.988 | 0.258 |
| 1369263_at   | NM_022631 | wingless-type MMTV integration site 5A                                                                           | Wnt5a                 | 1.375 | 0.674 | 1.046 | 0.980 | 0.778 | 0.377 | 0.677 | 0.294 |
| 1385385_at   | BE116745  | Wingless-type MMTV integration site 5A                                                                           | Wnt5a                 | 0.997 | 0.890 | 0.997 | 0.377 | 2.012 | 0.000 | 0.995 | 0.994 |
| 1387227_at   | NM_057192 | Wiskott-Aldrich syndrome protein interacting protein                                                             | Waspip                | 1.738 | 0.288 | 1.002 | 0.708 | 0.852 | 0.672 | 0.868 | 0.403 |
| 1376124_at   | BG375480  | Wiskott-Aldrich syndrome-like (human)                                                                            | Wasl                  | 2.402 | 0.038 | 1.526 | 0.051 | 2.394 | 0.049 | 1.373 | 0.004 |
| 1384549_at   | BI292428  | Within bgcn homolog (Drosophila) (predicted)                                                                     | Wibg_predicted        | 1.337 | 0.811 | 0.865 | 0.275 | 0.999 | 0.114 | 0.620 | 0.616 |
| 1369203_at   | NM_053738 | Wnt inhibitory factor 1                                                                                          | Wif1                  | 0.845 | 0.375 | 0.315 | 0.007 | 0.624 | 0.162 | 0.557 | 0.019 |
| 1392806_at   | AI234807  | Wolf-Hirschhorn syndrome candidate 1-like 1 (predicted)                                                          | Whsc1l1_predicted     | 1.917 | 0.089 | 2.082 | 0.000 | 1.084 | 0.812 | 1.747 | 0.010 |
| 1378114_at   | BF415965  | Wolf-Hirschhorn syndrome candidate 1-like 1 (predicted)                                                          | Whsc1l1_predicted     | 0.958 | 0.794 | 0.681 | 0.102 | 0.889 | 0.513 | 0.461 | 0.029 |
| 1385941_at   | BI295778  | Wolf-Hirschhorn syndrome candidate 1-like 1 (predicted)                                                          | Whsc1l1_predicted     | 1.002 | 0.981 | 0.979 | 0.940 | 1.420 | 0.007 | 1.013 | 0.904 |
| 1389175_at   | AA956953  | Wolf-Hirschhorn syndrome candidate 2 (human)                                                                     | Whsc2                 | 0.684 | 0.973 | 0.846 | 0.048 | 0.941 | 0.675 | 0.944 | 0.125 |
| 1368839_at   | AI407433  | Wolfram syndrome 1 homolog (human)                                                                               | Wfs1                  | 0.481 | 0.014 | 1.026 | 0.776 | 0.572 | 0.004 | 0.989 | 0.766 |
| 1387356_at   | NM_031823 | Wolfram syndrome 1 homolog (human)                                                                               | Wfs1                  | 0.996 | 0.918 | 0.937 | 0.291 | 0.998 | 0.926 | 0.935 | 0.276 |
| 1372232_at   | AI170808  | WW domain binding protein 1                                                                                      | Wbp1                  | 0.512 | 0.127 | 0.425 | 0.000 | 0.698 | 0.255 | 0.381 | 0.047 |
| 1380108_at   | BI289053  | WW domain binding protein 1                                                                                      | Wbp1                  | 0.997 | 0.817 | 1.035 | 0.588 | 1.000 | 0.997 | 1.037 | 0.739 |
| 1372575_at   | AA892364  | WW domain binding protein 11                                                                                     | Wbp11                 | 0.984 | 0.847 | 1.446 | 0.062 | 0.848 | 0.400 | 1.294 | 0.018 |
| 1384154_at   | BF554739  | WW domain binding protein 4                                                                                      | Wbp4                  | 1.208 | 0.181 | 0.946 | 0.342 | 1.534 | 0.033 | 0.926 | 0.310 |
| 1396170_at   | BG663444  | WW domain binding protein 4                                                                                      | Wbp4                  | 0.762 | 0.277 | 1.009 | 0.894 | 0.995 | 0.472 | 1.115 | 0.091 |

|              |           |                                                                                                                                   |                                                  |       |       |       |       |       |       |       |       |
|--------------|-----------|-----------------------------------------------------------------------------------------------------------------------------------|--------------------------------------------------|-------|-------|-------|-------|-------|-------|-------|-------|
| 1389857_at   | BG378874  | WW domain binding protein 5 (predicted)                                                                                           | Wbp5_predicted                                   | 0.567 | 0.326 | 0.578 | 0.023 | 0.561 | 0.055 | 0.620 | 0.006 |
| 1395268_at   | BM383223  | WW domain containing E3 ubiquitin protein ligase 1                                                                                | Wwp1                                             | 1.432 | 0.319 | 2.656 | 0.029 | 1.780 | 0.044 | 2.496 | 0.034 |
| 1374256_at   | BM384248  | WW domain containing E3 ubiquitin protein ligase 2 (predicted)                                                                    | Wwp2_predicted                                   | 1.189 | 0.385 | 2.744 | 0.034 | 0.998 | 0.757 | 1.266 | 0.931 |
| 1379922_at   | BM389053  | WW domain containing E3 ubiquitin protein ligase 2 (predicted)                                                                    | Wwp2_predicted                                   | 1.000 | 0.862 | 2.020 | 0.059 | 1.610 | 0.129 | 1.304 | 0.138 |
| 1379321_at   | AI180133  | X Kell blood group precursor related family member 6 homolog                                                                      | Xkr6                                             | 0.621 | 0.009 | 0.586 | 0.001 | 0.710 | 0.087 | 0.539 | 0.075 |
| 1371249_at   | BF417262  | X-box binding protein 1                                                                                                           | Xbp1                                             | 0.703 | 0.122 | 0.927 | 0.062 | 0.627 | 0.080 | 0.942 | 0.208 |
| 1375846_at   | BE113490  | Xenotropic and polytropic retrovirus receptor 1 (predicted)                                                                       | Xpr1_predicted                                   | 2.057 | 0.007 | 1.467 | 0.055 | 1.895 | 0.004 | 1.267 | 0.096 |
| 1384029_at   | BF554085  | xeroderma pigmentosum, complementation group A (predicted)                                                                        | Xpa_predicted                                    | 1.839 | 0.184 | 1.696 | 0.111 | 0.640 | 0.043 | 1.172 | 0.655 |
| 1390381_at   | BG379358  | xeroderma pigmentosum, complementation group C (predicted)                                                                        | Xpc_predicted                                    | 1.290 | 0.324 | 1.270 | 0.040 | 1.437 | 0.072 | 1.466 | 0.011 |
| 1394928_at   | BG669146  | XK-related protein 4                                                                                                              | XRG4                                             | 1.580 | 0.496 | 1.737 | 0.088 | 0.999 | 0.987 | 1.419 | 0.157 |
| 1382025_at   | BG668084  | X-linked myotubular myopathy gene 1                                                                                               | Mtm1                                             | 0.736 | 0.035 | 0.677 | 0.117 | 0.766 | 0.050 | 0.692 | 0.105 |
| 1370343_at   | AF277899  | XPA binding protein 2                                                                                                             | Xab2                                             | 1.009 | 0.418 | 1.666 | 0.126 | 0.999 | 0.256 | 1.606 | 0.032 |
| 1370160_at   | AI178742  | X-prolyl aminopeptidase (aminopeptidase P) 1, soluble                                                                             | Xpnpep1                                          | 0.845 | 0.158 | 0.915 | 0.068 | 0.808 | 0.373 | 0.985 | 0.574 |
| 1374304_at   | AW526081  | X-ray repair complementing defective repair in Chinese hamster cells 4                                                            | Xrcc4                                            | 1.476 | 0.168 | 0.864 | 0.750 | 1.025 | 0.516 | 1.055 | 0.053 |
| 1370931_at   | AA893188  | X-ray repair complementing defective repair in Chinese hamster cells 5                                                            | Xrcc5                                            | 0.984 | 0.978 | 0.465 | 0.071 | 1.342 | 0.981 | 0.753 | 0.175 |
| 1370537_at   | AB066102  | X-ray repair complementing defective repair in Chinese hamster cells 6                                                            | Xrcc6                                            | 0.481 | 0.045 | 1.019 | 0.692 | 0.282 | 0.053 | 1.498 | 0.404 |
| 1390857_at   | BI279844  | xylulokinase homolog (H. influenzae)                                                                                              | Xylb                                             | 0.676 | 0.025 | 1.234 | 0.113 | 0.694 | 0.045 | 0.958 | 0.998 |
| 1370213_at   | BI282111  | Y box protein 1 related, pseudogene 3 /// similar to nuclease sensitive element binding protein 1 (predicted) /// Y box protein 1 | Ybx1-ps3 ///<br>RGD1560265_predicted ///<br>Ybx1 | 0.891 | 0.515 | 1.039 | 0.259 | 0.914 | 0.360 | 0.960 | 0.582 |
| 1387277_at   | NM_030857 | Yamaguchi sarcoma viral (v-yes-1) oncogene homolog                                                                                | Lyn                                              | 1.170 | 0.281 | 0.980 | 0.927 | 1.425 | 0.894 | 0.737 | 0.103 |
| 1378100_at   | BG380660  | YEATS domain containing 4 (predicted)                                                                                             | Yeats4_predicted                                 | 1.469 | 0.366 | 0.944 | 0.948 | 1.213 | 0.352 | 1.050 | 0.208 |
| 1372893_at   | BI284198  | Yip1 domain family, member 1                                                                                                      | Yipf1                                            | 0.826 | 0.685 | 0.555 | 0.005 | 0.528 | 0.198 | 0.567 | 0.004 |
| 1376670_at   | AW434026  | Yip1 domain family, member 2                                                                                                      | Yipf2                                            | 0.657 | 0.468 | 0.680 | 0.029 | 0.725 | 0.162 | 0.689 | 0.098 |
| 1389035_at   | BF284830  | Yip1 domain family, member 3                                                                                                      | Yipf3                                            | 0.542 | 0.299 | 0.280 | 0.002 | 0.546 | 0.040 | 0.323 | 0.051 |
| 1394414_at   | BF386706  | Yip1 domain family, member 4                                                                                                      | Yipf4                                            | 0.688 | 0.073 | 0.555 | 0.001 | 0.892 | 0.048 | 0.610 | 0.031 |
| 1376727_at   | BF283348  | Yip1 domain family, member 4                                                                                                      | Yipf4                                            | 0.779 | 0.561 | 0.923 | 0.464 | 0.720 | 0.833 | 0.921 | 0.723 |
| 1371843_at   | AI234128  | Yip1 domain family, member 5                                                                                                      | Yipf5                                            | 0.641 | 0.038 | 1.113 | 0.094 | 0.579 | 0.012 | 1.029 | 0.153 |
| 1370305_at   | U96490    | Yip1 interacting factor homolog (S. cerevisiae)                                                                                   | Yif1                                             | 0.479 | 0.278 | 0.978 | 0.346 | 0.356 | 0.019 | 0.950 | 0.702 |
| 1389715_at   | BG381499  | yippee-like 4                                                                                                                     | Ypel4                                            | 1.364 | 0.535 | 0.443 | 0.005 | 2.008 | 0.028 | 0.598 | 0.224 |
| 1371729_at   | AI169150  | yippee-like 5 (Drosophila)                                                                                                        | Ypel5                                            | 0.919 | 0.383 | 1.649 | 0.015 | 0.892 | 0.231 | 1.574 | 0.049 |
| 1373826_at   | AI170754  | yippee-like 5 (Drosophila)                                                                                                        | Ypel5                                            | 1.195 | 0.402 | 2.125 | 0.001 | 1.010 | 0.953 | 1.765 | 0.002 |
| 1368843_at   | NM_053682 | YME1-like 1 (S. cerevisiae)                                                                                                       | Yme1l1                                           | 1.014 | 0.285 | 1.172 | 0.414 | 1.131 | 0.142 | 0.986 | 0.882 |
| 1385999_at   | AA849923  | YME1-like 1 (S. cerevisiae)                                                                                                       | Yme1l1                                           | 0.942 | 0.627 | 0.712 | 0.060 | 1.043 | 0.365 | 0.698 | 0.003 |
| 1394059_s_at | AA849923  | YME1-like 1 (S. cerevisiae)                                                                                                       | Yme1l1                                           | 0.904 | 0.862 | 0.648 | 0.012 | 0.909 | 0.715 | 0.783 | 0.089 |
| 1367498_at   | AI177873  | YTH domain family 1                                                                                                               | Ythdf1                                           | 0.770 | 0.004 | 0.675 | 0.003 | 1.122 | 0.153 | 0.782 | 0.009 |
| 1385699_at   | BI283897  | YTH domain family 1                                                                                                               | Ythdf1                                           | 1.003 | 0.966 | 1.498 | 0.019 | 1.232 | 0.812 | 1.442 | 0.044 |
| 1389524_at   | AA997881  | YTH domain family 3 (predicted)                                                                                                   | Ythdf3_predicted                                 | 0.806 | 0.695 | 0.699 | 0.068 | 0.827 | 0.294 | 0.695 | 0.024 |
| 1375122_at   | AI233235  | YY1 associated factor 2 (predicted)                                                                                               | Yaf2_predicted                                   | 1.674 | 0.086 | 1.832 | 0.076 | 1.504 | 0.011 | 1.408 | 0.100 |
| 1375903_a_at | AI012344  | YY1 associated factor 2 (predicted)                                                                                               | Yaf2_predicted                                   | 0.972 | 0.923 | 1.198 | 0.881 | 0.983 | 0.393 | 0.837 | 0.902 |
| 1392677_at   | AA924705  | Zic family member 4 (predicted)                                                                                                   | Zic4_predicted                                   | 1.131 | 0.688 | 0.943 | 0.829 | 2.560 | 0.025 | 0.705 | 0.217 |
| 1379264_at   | BE109004  | zinc and ring finger 1 (predicted)                                                                                                | Znrf1_predicted                                  | 1.077 | 0.611 | 0.596 | 0.027 | 0.869 | 0.342 | 0.694 | 0.069 |
| 1377844_at   | AI411520  | zinc binding alcohol dehydrogenase, domain containing 1                                                                           | Zadh1                                            | 0.819 | 0.548 | 0.864 | 0.411 | 0.966 | 0.293 | 1.356 | 0.895 |
| 1388731_at   | AA850919  | zinc binding alcohol dehydrogenase, domain containing 2 (predicted)                                                               | Zadh2_predicted                                  | 0.427 | 0.318 | 0.221 | 0.006 | 0.511 | 0.048 | 0.221 | 0.031 |
| 1393652_at   | BF398438  | zinc finger and BTB domain containing 1                                                                                           | Zbtb1                                            | 2.040 | 0.091 | 1.337 | 0.261 | 2.585 | 0.089 | 1.310 | 0.001 |
| 1385217_at   | BM385870  | Zinc finger and BTB domain containing 10                                                                                          | Zbtb10                                           | 2.790 | 0.006 | 6.073 | 0.019 | 2.060 | 0.022 | 3.315 | 0.002 |
| 1379578_at   | BF415114  | zinc finger and BTB domain containing 20 (predicted)                                                                              | Zbtb20_predicted                                 | 0.728 | 0.366 | 0.635 | 0.034 | 1.100 | 0.729 | 0.813 | 0.039 |
| 1375867_at   | AW524493  | zinc finger and BTB domain containing 4 (predicted)                                                                               | Zbtb4_predicted                                  | 0.645 | 0.012 | 0.472 | 0.003 | 0.533 | 0.014 | 0.530 | 0.006 |
| 1375302_at   | BM384146  | zinc finger and BTB domain containing 4 (predicted)                                                                               | Zbtb4_predicted                                  | 1.301 | 0.429 | 0.646 | 0.015 | 0.740 | 0.641 | 0.629 | 0.030 |
| 1394675_at   | AI178470  | Zinc finger and BTB domain containing 40 (predicted)                                                                              | Zbtb40_predicted                                 | 1.080 | 0.759 | 0.994 | 0.911 | 1.003 | 1.000 | 1.029 | 0.057 |
| 1387107_at   | NM_054002 | zinc finger and BTB domain containing 7a                                                                                          | Zbtb7a                                           | 1.355 | 0.338 | 2.105 | 0.011 | 1.619 | 0.983 | 1.857 | 0.012 |
| 1389907_at   | AI169317  | zinc finger and BTB domain containing 8 opposite strand (predicted)                                                               | Zbtb8os_predicted                                | 0.475 | 0.239 | 0.610 | 0.115 | 0.252 | 0.009 | 0.650 | 0.096 |
| 1377454_at   | AW524041  | zinc finger and BTB domain containing 9                                                                                           | Zbtb9                                            | 0.812 | 0.180 | 1.198 | 0.310 | 0.701 | 0.044 | 1.211 | 0.631 |
| 1379971_at   | BE102241  | zinc finger CCCH type containing 6 (predicted)                                                                                    | Zc3h6_predicted                                  | 1.315 | 0.393 | 0.796 | 0.243 | 0.916 | 0.522 | 0.748 | 0.162 |
| 1374208_at   | BE116569  | zinc finger CCCH type containing 7 A (predicted)                                                                                  | Zc3h7a_predicted                                 | 2.029 | 0.000 | 2.455 | 0.000 | 2.751 | 0.009 | 1.987 | 0.001 |
| 1378119_at   | BG381574  | zinc finger CCCH type containing 8                                                                                                | Zc3h8                                            | 1.250 | 0.401 | 1.672 | 0.005 | 0.854 | 0.180 | 1.447 | 0.114 |
| 1388409_at   | AW142595  | zinc finger CCCH-type containing 7B (predicted)                                                                                   | Zc3h7b_predicted                                 | 0.965 | 0.370 | 1.094 | 0.327 | 0.911 | 0.737 | 0.976 | 0.709 |
| 1371624_at   | BI279282  | zinc finger CCCH-type containing 7B (predicted)                                                                                   | Zc3h7b_predicted                                 | 0.811 | 0.861 | 0.684 | 0.097 | 1.373 | 0.321 | 0.805 | 0.305 |
| 1392629_a_at | BF386158  | zinc finger CCHC-type and RNA binding motif 1                                                                                     | Zcrb1                                            | 0.837 | 0.889 | 1.136 | 0.383 | 1.111 | 0.012 | 1.261 | 0.006 |
| 1375582_at   | AW531902  | zinc finger homeodomain 4 (predicted)                                                                                             | Zfhx4_predicted                                  | 1.122 | 0.955 | 1.165 | 0.166 | 1.892 | 0.223 | 0.737 | 0.309 |
| 1384282_at   | BG379149  | zinc finger proliferation 1                                                                                                       | Zipro1                                           | 1.440 | 0.332 | 2.122 | 0.026 | 1.026 | 0.921 | 1.839 | 0.049 |



|              |           |                                                           |                  |        |       |       |       |        |       |       |       |
|--------------|-----------|-----------------------------------------------------------|------------------|--------|-------|-------|-------|--------|-------|-------|-------|
| 1370984_at   | AF151710  | Zinc finger protein (pMLZ-4) mRNA, 3' untranslated region | ---              | 0.897  | 0.568 | 1.021 | 0.083 | 0.862  | 0.814 | 1.465 | 0.069 |
| 1399086_at   | AI179640  | zinc finger protein 105                                   | Zfp105           | 0.719  | 0.427 | 0.822 | 0.975 | 0.567  | 0.035 | 1.190 | 0.282 |
| 1372593_at   | AI137283  | zinc finger protein 110                                   | Zfp110           | 0.793  | 0.589 | 0.711 | 0.051 | 0.637  | 0.139 | 0.881 | 0.287 |
| 1395418_at   | BE110637  | zinc finger protein 131                                   | Zfp131           | 0.780  | 0.382 | 1.098 | 0.226 | 1.000  | 0.840 | 1.349 | 0.164 |
| 1393780_at   | AA924380  | zinc finger protein 131                                   | Zfp131           | 0.840  | 0.661 | 1.247 | 0.144 | 1.152  | 0.055 | 1.225 | 0.095 |
| 1395839_at   | BF561078  | Zinc finger protein 142 (clone pHZ-49) (predicted)        | Znf142_predicted | 1.299  | 0.258 | 0.799 | 0.168 | 1.265  | 0.372 | 0.874 | 0.032 |
| 1379164_at   | BE117672  | Zinc finger protein 142 (clone pHZ-49) (predicted)        | Znf142_predicted | 1.927  | 0.277 | 1.539 | 0.068 | 1.485  | 0.236 | 1.415 | 0.048 |
| 1379704_at   | BM383283  | zinc finger protein 143                                   | Zfp143           | 1.238  | 0.012 | 1.562 | 0.087 | 1.143  | 0.201 | 1.282 | 0.211 |
| 1378405_at   | AI170262  | zinc finger protein 143                                   | Zfp143           | 1.811  | 0.104 | 1.581 | 0.042 | 2.698  | 0.051 | 1.018 | 0.976 |
| 1381998_at   | AW519820  | Zinc finger protein 148                                   | Zfp148           | 0.930  | 0.071 | 0.842 | 0.009 | 0.632  | 0.006 | 0.913 | 0.041 |
| 1368067_at   | NM_031615 | zinc finger protein 148                                   | Zfp148           | 0.599  | 0.213 | 0.428 | 0.063 | 0.633  | 0.139 | 0.554 | 0.011 |
| 1384783_at   | BI289823  | zinc finger protein 161                                   | Zfp161           | 0.995  | 0.314 | 0.936 | 0.102 | 1.100  | 0.579 | 0.894 | 0.476 |
| 1380106_at   | BF283079  | zinc finger protein 162                                   | Zfp162           | 0.853  | 0.788 | 0.664 | 0.060 | 0.897  | 0.275 | 0.565 | 0.049 |
| 1398339_at   | BE109605  | zinc finger protein 162                                   | Zfp162           | 1.078  | 0.904 | 1.109 | 0.891 | 0.878  | 0.536 | 0.976 | 0.203 |
| 1387962_at   | U41164    | zinc finger protein 180                                   | Zfp180           | 0.816  | 0.370 | 1.907 | 0.102 | 0.842  | 0.685 | 0.947 | 0.527 |
| 1388779_at   | BG381516  | zinc finger protein 180                                   | Zfp180           | 0.878  | 0.931 | 1.237 | 0.016 | 0.633  | 0.020 | 1.488 | 0.038 |
| 1377837_at   | AI231532  | zinc finger protein 183 (RING finger, C3HC4 type)         | Znf183           | 0.446  | 0.026 | 0.483 | 0.010 | 0.596  | 0.005 | 0.772 | 0.025 |
| 1383445_at   | BG667490  | zinc finger protein 191                                   | Zfp191           | 1.005  | 0.957 | 0.830 | 0.168 | 0.803  | 0.106 | 0.713 | 0.157 |
| 1397132_at   | BF390612  | Zinc finger protein 207                                   | Zfp207           | 1.178  | 0.027 | 1.397 | 0.229 | 0.876  | 0.337 | 0.954 | 0.981 |
| 1394591_at   | AI411280  | zinc finger protein 207                                   | Zfp207           | 1.449  | 0.495 | 1.209 | 0.063 | 1.213  | 0.095 | 1.153 | 0.588 |
| 1385145_at   | BE119870  | Zinc finger protein 212                                   | Zfp212           | 1.115  | 0.156 | 1.269 | 0.338 | 1.212  | 0.342 | 0.879 | 0.102 |
| 1380094_a_at | AI178375  | Zinc finger protein 212                                   | Zfp212           | 1.186  | 0.204 | 1.099 | 0.885 | 0.643  | 0.078 | 0.996 | 0.469 |
| 1386424_at   | AI178375  | Zinc finger protein 212                                   | Zfp212           | 1.219  | 0.273 | 1.187 | 0.670 | 0.735  | 0.049 | 0.879 | 0.043 |
| 1383905_at   | BF401729  | Zinc finger protein 216 (predicted)                       | Zfp216_predicted | 1.169  | 0.157 | 0.343 | 0.032 | 0.968  | 0.375 | 0.531 | 0.008 |
| 1388868_at   | AI172425  | zinc finger protein 216 (predicted)                       | Zfp216_predicted | 1.474  | 0.659 | 0.970 | 0.760 | 1.072  | 0.826 | 1.174 | 0.047 |
| 1374189_at   | BG668883  | zinc finger protein 219                                   | Zfp219           | 2.344  | 0.025 | 2.080 | 0.005 | 2.903  | 0.041 | 2.043 | 0.005 |
| 1389252_at   | AI102190  | Zinc finger protein 238                                   | Zfp238           | 1.814  | 0.031 | 1.335 | 0.005 | 2.080  | 0.039 | 1.590 | 0.037 |
| 1393940_at   | AI070444  | Zinc finger protein 251 (predicted)                       | Znf251_predicted | 0.824  | 0.063 | 0.829 | 0.235 | 0.530  | 0.030 | 0.972 | 0.916 |
| 1372817_at   | BI291616  | zinc finger protein 260                                   | Zfp260           | 0.979  | 0.623 | 0.778 | 0.169 | 1.353  | 0.065 | 1.175 | 0.129 |
| 1368228_at   | NM_031616 | zinc finger protein 265                                   | Zfp265           | 0.543  | 0.003 | 0.819 | 0.031 | 0.717  | 0.016 | 0.769 | 0.011 |
| 1387117_at   | AF013965  | zinc finger protein 265                                   | Zfp265           | 0.581  | 0.190 | 1.250 | 0.754 | 0.760  | 0.163 | 0.987 | 0.685 |
| 1372205_at   | AI713121  | zinc finger protein 278                                   | Zfp278           | 0.892  | 0.124 | 0.436 | 0.006 | 0.975  | 0.449 | 0.581 | 0.221 |
| 1382642_at   | BI291753  | zinc finger protein 281                                   | Zfp281           | 0.961  | 0.109 | 1.088 | 0.376 | 1.089  | 0.982 | 0.972 | 0.128 |
| 1385869_at   | AI408878  | Zinc finger protein 281                                   | Zfp281           | 0.932  | 0.148 | 0.751 | 0.091 | 0.881  | 0.937 | 0.838 | 0.217 |
| 1385870_at   | AA997980  | Zinc finger protein 281                                   | Zfp281           | 0.883  | 0.768 | 1.005 | 0.538 | 0.825  | 0.394 | 1.005 | 0.980 |
| 1367486_at   | BM386412  | zinc finger protein 289                                   | Zfp289           | 0.651  | 0.113 | 0.713 | 0.119 | 0.307  | 0.105 | 0.577 | 0.057 |
| 1371520_at   | BI296732  | zinc finger protein 291                                   | Znf291           | 1.051  | 0.315 | 1.010 | 0.889 | 1.116  | 0.510 | 0.938 | 0.661 |
| 1390945_at   | BI294878  | zinc finger protein 292                                   | Znf292           | 1.360  | 0.018 | 3.399 | 0.005 | 1.680  | 0.064 | 2.737 | 0.004 |
| 1376917_at   | BF388585  | zinc finger protein 292                                   | Znf292           | 1.545  | 0.171 | 2.165 | 0.003 | 2.025  | 0.103 | 1.443 | 0.704 |
| 1379441_at   | AA965092  | zinc finger protein 294                                   | Zfp294           | 0.610  | 0.014 | 0.390 | 0.001 | 0.705  | 0.019 | 0.702 | 0.049 |
| 1383462_at   | BF566263  | zinc finger protein 294                                   | Zfp294           | 0.894  | 0.410 | 1.070 | 0.063 | 1.144  | 0.775 | 0.940 | 0.326 |
| 1399110_at   | AW921218  | zinc finger protein 297                                   | Zfp297           | 1.173  | 0.039 | 0.956 | 0.133 | 0.700  | 0.955 | 0.872 | 0.202 |
| 1373763_at   | AI013512  | zinc finger protein 297B                                  | Zfp297b          | 1.647  | 0.042 | 1.951 | 0.002 | 1.566  | 0.067 | 1.628 | 0.000 |
| 1398573_at   | BE098868  | zinc finger protein 307                                   | Zfp307           | 1.269  | 0.021 | 0.746 | 0.035 | 0.939  | 0.711 | 0.877 | 0.215 |
| 1382744_at   | H33694    | zinc finger protein 307                                   | Zfp307           | 1.073  | 0.533 | 0.894 | 0.475 | 0.907  | 0.550 | 0.800 | 0.990 |
| 1395198_at   | BE099956  | Zinc finger protein 313                                   | Zfp313           | 1.823  | 0.049 | 1.452 | 0.367 | 2.567  | 0.027 | 1.683 | 0.542 |
| 1375955_at   | BI289415  | zinc finger protein 313                                   | Zfp313           | 3.095  | 0.060 | 2.087 | 0.004 | 3.583  | 0.000 | 3.216 | 0.000 |
| 1386093_at   | BI274863  | zinc finger protein 324 (predicted)                       | Znf324_predicted | 0.458  | 0.043 | 0.989 | 0.786 | 0.459  | 0.041 | 1.005 | 0.999 |
| 1389531_at   | AW523471  | zinc finger protein 330 (predicted)                       | Zfp330_predicted | 0.782  | 0.454 | 2.123 | 0.002 | 0.824  | 0.007 | 1.506 | 0.024 |
| 1381609_at   | AI710364  | zinc finger protein 335                                   | Zfp335           | 1.379  | 0.196 | 2.096 | 0.031 | 0.956  | 0.437 | 1.520 | 0.042 |
| 1390641_at   | BE111799  | Zinc finger protein 346 (predicted)                       | Zfp346_predicted | 1.378  | 0.181 | 0.984 | 0.671 | 0.956  | 0.791 | 0.945 | 0.096 |
| 1381283_at   | BE105217  | Zinc finger protein 346 (predicted)                       | Zfp346_predicted | 0.950  | 0.875 | 0.800 | 0.361 | 1.053  | 0.178 | 0.824 | 0.351 |
| 1368726_a_at | AB047638  | zinc finger protein 347                                   | Zfp347           | 1.222  | 0.146 | 1.668 | 0.058 | 1.159  | 0.530 | 1.687 | 0.000 |
| 1368877_at   | NM_052798 | zinc finger protein 354A                                  | Zfp354a          | 1.951  | 0.466 | 1.715 | 0.032 | 1.682  | 0.593 | 2.388 | 0.018 |
| 1393127_at   | AI707002  | zinc finger protein 358 (predicted)                       | Zfp358_predicted | 1.052  | 0.510 | 1.075 | 0.333 | 0.789  | 0.115 | 1.274 | 0.052 |
| 1387870_at   | AB025017  | zinc finger protein 36                                    | Zfp36            | 11.336 | 0.031 | 4.636 | 0.001 | 19.573 | 0.016 | 9.877 | 0.001 |
| 1369959_at   | NM_017172 | zinc finger protein 36, C3H type-like 1                   | Zfp36l1          | 1.040  | 0.674 | 1.276 | 0.037 | 1.368  | 0.037 | 2.478 | 0.025 |
| 1373106_at   | AI178069  | zinc finger protein 36, C3H type-like 2                   | Zfp36l2          | 2.706  | 0.000 | 3.616 | 0.001 | 1.539  | 0.004 | 3.017 | 0.000 |
| 1375344_at   | BF418884  | Zinc finger protein 36, C3H type-like 2                   | Zfp36l2          | 1.001  | 0.490 | 1.123 | 0.457 | 1.001  | 0.911 | 0.999 | 0.260 |
| 1372865_at   | AI171206  | zinc finger protein 364 (predicted)                       | Zfp364_predicted | 2.907  | 0.044 | 3.390 | 0.000 | 4.105  | 0.001 | 4.374 | 0.001 |
| 1384272_at   | BG378837  | Zinc finger protein 365                                   | Zfp365           | 1.003  | 0.974 | 1.030 | 0.959 | 3.756  | 0.037 | 1.192 | 0.119 |

|              |           |                                                                 |                             |       |       |       |       |       |       |       |       |
|--------------|-----------|-----------------------------------------------------------------|-----------------------------|-------|-------|-------|-------|-------|-------|-------|-------|
| 1379967_at   | AI501039  | zinc finger protein 367                                         | Zfp367                      | 0.897 | 0.739 | 0.848 | 0.266 | 0.998 | 0.987 | 0.602 | 0.052 |
| 1381166_at   | AA944650  | Zinc finger protein 383 (predicted)                             | Znf383_predicted            | 1.109 | 0.088 | 1.373 | 0.002 | 1.004 | 0.300 | 0.997 | 0.061 |
| 1370175_a_at | AI177799  | zinc finger protein 384                                         | Zfp384                      | 1.262 | 0.082 | 1.562 | 0.004 | 1.110 | 0.258 | 1.484 | 0.014 |
| 1368712_at   | NM_019620 | zinc finger protein 386 (Kruppel-like)                          | Znf386                      | 1.192 | 0.339 | 1.091 | 0.857 | 1.324 | 0.521 | 0.916 | 0.833 |
| 1390148_a_at | BM388100  | Zinc finger protein 395 (predicted)                             | Zfp395_predicted            | 0.158 | 0.001 | 0.926 | 0.228 | 0.167 | 0.001 | 0.620 | 0.023 |
| 1372201_at   | AI233698  | zinc finger protein 403                                         | Zfp403                      | 1.299 | 0.020 | 2.212 | 0.018 | 1.368 | 0.013 | 2.002 | 0.010 |
| 1382721_at   | BI280928  | zinc finger protein 403                                         | Zfp403                      | 1.023 | 0.827 | 1.655 | 0.007 | 0.845 | 0.285 | 1.158 | 0.439 |
| 1392966_at   | BF396256  | zinc finger protein 410 (predicted)                             | Zfp410_predicted            | 1.378 | 0.179 | 1.967 | 0.014 | 1.368 | 0.174 | 1.296 | 0.142 |
| 1387105_at   | NM_133579 | zinc finger protein 422 /// zinc finger protein 422 (predicted) | Zfp422 /// Zfp422_predicted | 0.792 | 0.119 | 0.587 | 0.052 | 0.785 | 0.039 | 0.646 | 0.014 |
| 1372985_at   | BG378167  | zinc finger protein 444 (predicted)                             | Zfp444_predicted            | 0.776 | 0.010 | 1.258 | 0.024 | 0.669 | 0.020 | 1.014 | 0.862 |
| 1384901_at   | BF523017  | Zinc finger protein 451                                         | Zfp451                      | 0.463 | 0.060 | 0.742 | 0.075 | 0.468 | 0.049 | 0.873 | 0.611 |
| 1382242_at   | BE105280  | zinc finger protein 451                                         | Zfp451                      | 1.080 | 0.248 | 0.640 | 0.000 | 1.566 | 0.883 | 0.672 | 0.003 |
| 1372480_at   | BE117893  | zinc finger protein 462 (predicted)                             | Zfp462_predicted            | 1.086 | 0.152 | 0.672 | 0.040 | 0.770 | 0.132 | 0.605 | 0.012 |
| 1372483_at   | AI230979  | zinc finger protein 469 (predicted)                             | Zfp469_predicted            | 1.608 | 0.065 | 0.639 | 0.007 | 0.782 | 0.917 | 0.474 | 0.027 |
| 1393311_at   | AI044549  | Zinc finger protein 469 (predicted)                             | Zfp469_predicted            | 1.290 | 0.081 | 2.443 | 0.089 | 1.136 | 0.537 | 1.654 | 0.116 |
| 1378609_at   | AI113031  | Zinc finger protein 5 (AZF5)                                    | ---                         | 0.673 | 0.267 | 0.834 | 0.489 | 0.786 | 0.460 | 0.735 | 0.048 |
| 1386721_at   | BF560938  | zinc finger protein 503 (predicted)                             | Zfp503_predicted            | 0.965 | 0.811 | 1.767 | 0.038 | 1.470 | 0.103 | 1.082 | 0.555 |
| 1391216_at   | BE114482  | zinc finger protein 509 (predicted)                             | Zfp509_predicted            | 0.952 | 0.221 | 0.528 | 0.053 | 0.953 | 0.250 | 0.529 | 0.053 |
| 1379657_a_at | BM386837  | zinc finger protein 511 (predicted)                             | Znf511_predicted            | 1.967 | 0.045 | 1.135 | 0.550 | 0.642 | 0.416 | 1.918 | 0.470 |
| 1372346_at   | AI230729  | zinc finger protein 513                                         | Zfp513                      | 1.370 | 0.032 | 1.058 | 0.821 | 1.585 | 0.065 | 1.242 | 0.618 |
| 1381831_at   | AI112536  | Zinc finger protein 532 (predicted)                             | Znf532_predicted            | 1.139 | 0.967 | 1.131 | 0.179 | 1.157 | 0.892 | 0.928 | 0.462 |
| 1391478_at   | BI281649  | zinc finger protein 532 (predicted)                             | Znf532_predicted            | 1.004 | 0.992 | 0.981 | 0.880 | 1.024 | 0.127 | 1.038 | 0.862 |
| 1390554_at   | AA818377  | zinc finger protein 533 (predicted)                             | Zfp533_predicted            | 3.743 | 0.021 | 1.783 | 0.028 | 1.331 | 0.092 | 1.073 | 0.686 |
| 1374127_at   | BM392050  | zinc finger protein 535                                         | Zfp535                      | 0.989 | 0.976 | 1.137 | 0.585 | 0.589 | 0.116 | 0.971 | 0.572 |
| 1390003_at   | BE103960  | zinc finger protein 57                                          | Zfp57                       | 0.463 | 0.152 | 0.733 | 0.003 | 0.797 | 0.339 | 0.931 | 0.362 |
| 1390357_at   | AW525082  | zinc finger protein 574                                         | Zfp574                      | 0.864 | 0.217 | 0.987 | 0.127 | 0.956 | 0.641 | 1.159 | 0.062 |
| 1383196_at   | BI289677  | zinc finger protein 579 (predicted)                             | Znf579_predicted            | 0.919 | 0.406 | 0.769 | 0.896 | 1.342 | 0.255 | 0.936 | 0.261 |
| 1377433_at   | BG376195  | zinc finger protein 580 (predicted)                             | Zfp580_predicted            | 0.989 | 0.765 | 0.891 | 0.553 | 1.124 | 0.815 | 0.998 | 0.851 |
| 1367524_at   | AW533822  | zinc finger protein 592 (predicted)                             | Zfp592_predicted            | 2.009 | 0.040 | 2.368 | 0.000 | 1.796 | 0.083 | 1.473 | 0.000 |
| 1393292_at   | BE114251  | zinc finger protein 592 (predicted)                             | Zfp592_predicted            | 1.717 | 0.055 | 5.251 | 0.000 | 0.949 | 0.403 | 3.415 | 0.013 |
| 1393572_at   | AI229129  | Zinc finger protein 592 (predicted)                             | Zfp592_predicted            | 1.267 | 0.360 | 1.121 | 0.080 | 1.622 | 0.059 | 1.352 | 0.105 |
| 1389523_at   | BM386127  | zinc finger protein 598 (predicted)                             | Zfp598_predicted            | 2.443 | 0.005 | 3.240 | 0.002 | 3.248 | 0.000 | 1.837 | 0.012 |
| 1395007_at   | BE120572  | Zinc finger protein 612 (predicted)                             | Zfp612_predicted            | 0.616 | 0.037 | 0.310 | 0.003 | 0.658 | 0.036 | 0.399 | 0.006 |
| 1373647_at   | BM392399  | zinc finger protein 622                                         | Zfp622                      | 0.847 | 0.815 | 1.663 | 0.018 | 0.649 | 0.039 | 1.236 | 0.031 |
| 1380717_at   | BF397758  | Zinc finger protein 626 (predicted)                             | Znf626_predicted            | 0.954 | 0.504 | 0.590 | 0.010 | 1.052 | 0.757 | 0.747 | 0.084 |
| 1377571_at   | BI276518  | zinc finger protein 628 (predicted)                             | Zfp628_predicted            | 2.464 | 0.068 | 2.467 | 0.028 | 3.484 | 0.210 | 3.451 | 0.029 |
| 1372789_at   | BF397881  | zinc finger protein 637                                         | Zfp637                      | 0.446 | 0.043 | 0.264 | 0.021 | 0.463 | 0.017 | 0.549 | 0.146 |
| 1385977_at   | BF557320  | Zinc finger protein 644 (predicted)                             | Zfp644_predicted            | 1.503 | 0.028 | 0.936 | 0.030 | 1.444 | 0.533 | 0.879 | 0.056 |
| 1367505_at   | AW916491  | Zinc finger protein 644 (predicted)                             | Zfp644_predicted            | 1.249 | 0.462 | 0.769 | 0.057 | 1.049 | 0.196 | 0.833 | 0.009 |
| 1383634_at   | BI298546  | zinc finger protein 653 (predicted)                             | Zfp653_predicted            | 0.654 | 0.292 | 1.069 | 0.954 | 0.915 | 0.407 | 1.015 | 0.909 |
| 1376840_at   | AI103040  | Zinc finger protein 655                                         | Zfp655                      | 1.151 | 0.150 | 1.499 | 0.040 | 1.596 | 0.132 | 1.526 | 0.167 |
| 1389685_at   | AI009613  | zinc finger protein 655                                         | Zfp655                      | 0.922 | 0.884 | 0.725 | 0.001 | 0.748 | 0.096 | 0.689 | 0.047 |
| 1398377_at   | AI172116  | zinc finger protein 672                                         | Zfp672                      | 0.926 | 0.780 | 0.773 | 0.075 | 0.651 | 0.185 | 0.891 | 0.338 |
| 1392835_at   | AI705060  | zinc finger protein 68 (predicted)                              | Zfp68_predicted             | 0.882 | 0.125 | 1.002 | 0.593 | 0.693 | 0.031 | 0.872 | 0.088 |
| 1385153_at   | AI555743  | zinc finger protein 68 (predicted)                              | Zfp68_predicted             | 0.831 | 0.576 | 3.263 | 0.000 | 0.951 | 0.887 | 1.945 | 0.003 |
| 1385236_at   | AA875617  | zinc finger protein 687 (predicted)                             | Zfp687_predicted            | 1.083 | 0.546 | 1.421 | 0.314 | 1.218 | 0.533 | 1.233 | 0.091 |
| 1389445_at   | AI406571  | zinc finger protein 688 (predicted)                             | Zfp688_predicted            | 0.990 | 0.631 | 1.053 | 0.737 | 0.846 | 0.851 | 1.244 | 0.766 |
| 1374944_at   | BI275829  | zinc finger protein 691 (predicted)                             | Zfp691_predicted            | 0.999 | 0.991 | 1.155 | 0.989 | 0.970 | 0.975 | 1.153 | 0.787 |
| 1379342_at   | BI297113  | zinc finger protein 692 (predicted)                             | Zfp692_predicted            | 0.452 | 0.020 | 0.441 | 0.009 | 0.591 | 0.044 | 0.609 | 0.007 |
| 1392913_at   | AA964151  | zinc finger protein 710 (predicted)                             | Zfp710_predicted            | 1.679 | 0.048 | 1.085 | 0.524 | 1.694 | 0.017 | 1.102 | 0.915 |
| 1399044_at   | AA819804  | Zinc finger protein 91                                          | Zfp91                       | 1.439 | 0.165 | 1.809 | 0.002 | 1.413 | 0.128 | 1.748 | 0.000 |
| 1383463_at   | AW918514  | Zinc finger protein 91                                          | Zfp91                       | 1.622 | 0.527 | 1.936 | 0.066 | 0.545 | 0.483 | 2.005 | 0.166 |
| 1377244_at   | BM390979  | Zinc finger protein 95 (predicted)                              | Zfp95_predicted             | 0.563 | 0.062 | 0.558 | 0.013 | 0.492 | 0.315 | 0.592 | 0.226 |
| 1384432_at   | AW531684  | zinc finger protein 96                                          | Zfp96                       | 0.850 | 0.310 | 0.919 | 0.197 | 0.696 | 0.384 | 1.315 | 0.008 |
| 1385078_at   | AA957582  | Zinc finger protein of the cerebellum 5 (predicted)             | Zic5_predicted              | 1.466 | 0.278 | 1.096 | 0.781 | 0.834 | 0.799 | 1.476 | 0.204 |
| 1381633_at   | BE116563  | Zinc finger protein X-linked (predicted)                        | Zfx_predicted               | 2.732 | 0.105 | 0.980 | 0.493 | 1.000 | 0.999 | 0.747 | 0.305 |
| 1394218_s_at | AI175842  | zinc finger protein, multitype 2 (predicted)                    | Zfpm2_predicted             | 1.584 | 0.063 | 2.190 | 0.033 | 2.131 | 0.205 | 1.269 | 0.068 |
| 1386550_at   | BF563739  | Zinc finger protein, subfamily 1A, 5 (predicted)                | Zfpn1a5_predicted           | 1.626 | 0.513 | 1.536 | 0.031 | 0.656 | 0.076 | 1.464 | 0.349 |
| 1393080_at   | BF389264  | zinc finger RNA binding protein                                 | Zfr                         | 1.173 | 0.096 | 2.388 | 0.001 | 0.788 | 0.204 | 2.686 | 0.002 |
| 1372878_at   | BG668247  | zinc finger RNA binding protein                                 | Zfr                         | 0.753 | 0.181 | 0.823 | 0.026 | 0.702 | 0.017 | 0.960 | 0.418 |

|              |           |                                                                         |                     |        |       |       |       |        |       |        |       |
|--------------|-----------|-------------------------------------------------------------------------|---------------------|--------|-------|-------|-------|--------|-------|--------|-------|
| 1371464_at   | BI295799  | zinc finger, A20 domain containing 3                                    | Za20d3              | 0.850  | 0.099 | 0.984 | 0.948 | 1.056  | 0.355 | 1.225  | 0.053 |
| 1373606_at   | AI411964  | zinc finger, AN1 type domain 2B                                         | Zfand2b             | 0.911  | 0.960 | 1.439 | 0.179 | 1.000  | 0.996 | 1.257  | 0.375 |
| 1373767_at   | AI406908  | zinc finger, AN1-type domain 2A                                         | Zfand2a             | 1.793  | 0.010 | 6.701 | 0.000 | 1.162  | 0.701 | 4.938  | 0.000 |
| 1376432_at   | BM383785  | zinc finger, AN1-type domain 3                                          | Zfand3              | 1.661  | 0.101 | 4.083 | 0.003 | 1.305  | 0.131 | 3.802  | 0.010 |
| 1398918_at   | BG380742  | zinc finger, AN1-type domain 3                                          | Zfand3              | 0.742  | 0.703 | 1.700 | 0.078 | 0.988  | 0.093 | 1.924  | 0.003 |
| 1373264_at   | BE110658  | zinc finger, BED domain containing 3                                    | Zbed3               | 0.609  | 0.045 | 1.475 | 0.016 | 0.478  | 0.003 | 1.218  | 0.026 |
| 1389237_at   | BM383698  | zinc finger, C3HC-type 1 (predicted)                                    | Zc3hc1_predicted    | 0.983  | 0.958 | 1.334 | 0.232 | 0.949  | 0.715 | 1.169  | 0.128 |
| 1374147_at   | BF420306  | zinc finger, CCCH-type with G patch domain                              | Zgpat               | 1.001  | 0.990 | 2.632 | 0.008 | 0.916  | 0.639 | 0.998  | 0.994 |
| 1376597_at   | AI100951  | zinc finger, CCHC domain containing 10                                  | Zcchc10             | 0.800  | 0.037 | 1.269 | 0.043 | 0.934  | 0.222 | 1.243  | 0.013 |
| 1390820_at   | BE108198  | zinc finger, CCHC domain containing 11 (predicted)                      | Zcchc11_predicted   | 2.238  | 0.065 | 1.156 | 0.289 | 2.650  | 0.022 | 2.176  | 0.015 |
| 1373891_at   | AI101009  | zinc finger, CCHC domain containing 12                                  | Zcchc12             | 0.775  | 0.087 | 0.412 | 0.010 | 0.835  | 0.639 | 0.452  | 0.002 |
| 1383239_at   | BF406915  | zinc finger, CCHC domain containing 7 (predicted)                       | Zcchc7_predicted    | 1.040  | 0.247 | 1.843 | 0.000 | 1.086  | 0.513 | 1.697  | 0.015 |
| 1384452_at   | AA924571  | zinc finger, CCHC domain containing 7 (predicted)                       | Zcchc7_predicted    | 1.321  | 0.440 | 1.701 | 0.000 | 1.179  | 0.269 | 1.705  | 0.001 |
| 1384380_at   | AI535316  | Zinc finger, CCHC domain containing 7 (predicted)                       | Zcchc7_predicted    | 1.533  | 0.832 | 1.273 | 0.046 | 1.321  | 0.793 | 1.246  | 0.131 |
| 1385007_at   | BI303672  | zinc finger, CCHC domain containing 9                                   | Zcchc9              | 0.986  | 0.120 | 1.001 | 0.992 | 0.886  | 0.060 | 1.085  | 0.644 |
| 1394293_at   | BG664973  | Zinc finger, CSL-type containing 3 (predicted)                          | Zcsl3_predicted     | 0.601  | 0.008 | 0.863 | 0.040 | 0.516  | 0.001 | 0.614  | 0.008 |
| 1390168_a_at | BI289564  | zinc finger, CSL-type containing 3 (predicted)                          | Zcsl3_predicted     | 0.690  | 0.013 | 1.013 | 0.516 | 0.568  | 0.017 | 0.794  | 0.012 |
| 1389357_at   | AW532663  | zinc finger, CW-type with coiled-coil domain 1 (predicted)              | Zcwcc1_predicted    | 1.076  | 0.752 | 1.177 | 0.232 | 0.421  | 0.020 | 0.985  | 0.219 |
| 1398455_at   | BG379973  | zinc finger, DHHC domain containing 13                                  | Zdhhc13             | 0.900  | 0.634 | 1.388 | 0.211 | 1.724  | 0.050 | 1.468  | 0.079 |
| 1374306_at   | BF394933  | zinc finger, DHHC domain containing 18                                  | Zdhhc18             | 0.971  | 0.484 | 0.726 | 0.081 | 1.571  | 0.028 | 0.968  | 0.662 |
| 1370828_at   | AF228917  | zinc finger, DHHC domain containing 2                                   | Zdhhc2              | 0.898  | 0.777 | 0.575 | 0.130 | 0.779  | 0.769 | 0.479  | 0.018 |
| 1390607_at   | BG380706  | zinc finger, DHHC domain containing 23                                  | Zdhhc23             | 0.630  | 0.015 | 1.120 | 0.941 | 0.791  | 0.333 | 1.323  | 0.189 |
| 1393388_at   | BM387780  | Zinc finger, DHHC domain containing 3                                   | Zdhhc3              | 0.728  | 0.321 | 0.687 | 0.153 | 0.657  | 0.023 | 0.736  | 0.049 |
| 1390039_at   | AA800535  | zinc finger, DHHC domain containing 3                                   | Zdhhc3              | 1.046  | 0.463 | 1.128 | 0.207 | 1.044  | 0.533 | 0.893  | 0.504 |
| 1374461_at   | AA893686  | zinc finger, DHHC domain containing 4                                   | Zdhhc4              | 1.012  | 0.402 | 1.911 | 0.056 | 0.641  | 0.085 | 1.137  | 0.561 |
| 1383572_at   | BF414797  | zinc finger, DHHC domain containing 6                                   | Zdhhc6              | 0.827  | 0.134 | 0.607 | 0.026 | 0.820  | 0.111 | 1.031  | 0.932 |
| 1368152_at   | NM_133394 | zinc finger, DHHC domain containing 7                                   | Zdhhc7              | 0.607  | 0.710 | 1.109 | 0.429 | 0.429  | 0.023 | 1.417  | 0.005 |
| 1373335_at   | BE349808  | Zinc finger, DHHC domain containing 9                                   | Zdhhc9              | 0.705  | 0.884 | 0.659 | 0.306 | 1.045  | 0.566 | 0.451  | 0.008 |
| 1381708_at   | BE097099  | Zinc finger, FYVE domain containing 1 (predicted)                       | Zfyve1_predicted    | 1.841  | 0.419 | 1.137 | 0.575 | 1.284  | 0.173 | 1.004  | 0.732 |
| 1375622_at   | BF402692  | zinc finger, FYVE domain containing 20 (predicted)                      | Zfyve20_predicted   | 0.778  | 0.865 | 1.841 | 0.243 | 0.981  | 0.602 | 0.678  | 0.496 |
| 1389152_at   | AI412984  | zinc finger, FYVE domain containing 27                                  | Zfyve27             | 0.353  | 0.025 | 0.260 | 0.000 | 0.358  | 0.010 | 0.342  | 0.008 |
| 1381049_at   | BG375951  | zinc finger, FYVE domain containing 9 (predicted)                       | Zfyve9_predicted    | 0.885  | 0.648 | 1.173 | 0.389 | 0.928  | 0.636 | 0.901  | 0.981 |
| 1371660_at   | AA945153  | zinc finger, HIT domain containing 1 (predicted)                        | Znhit1_predicted    | 0.669  | 0.489 | 1.056 | 0.619 | 0.804  | 0.087 | 1.000  | 0.304 |
| 1378050_at   | AI058960  | zinc finger, matrin type 2 /// similar to Histidyl-tRNA synthetase-like | Zmat2 /// LOC498842 | 0.983  | 0.848 | 1.004 | 0.667 | 1.061  | 0.984 | 1.003  | 0.966 |
| 1384795_at   | BE116205  | zinc finger, matrin-like (predicted)                                    | Zfml_predicted      | 1.074  | 0.320 | 0.695 | 0.217 | 1.600  | 0.844 | 0.636  | 0.013 |
| 1394975_at   | BF396896  | zinc finger, matrin-like (predicted)                                    | Zfml_predicted      | 1.085  | 0.604 | 1.014 | 0.152 | 0.760  | 0.661 | 0.714  | 0.047 |
| 1373764_at   | AI235272  | zinc finger, matrin-like (predicted)                                    | Zfml_predicted      | 1.037  | 0.820 | 0.975 | 0.388 | 1.005  | 0.746 | 0.947  | 0.191 |
| 1376189_at   | AA849377  | zinc finger, MYM domain containing 1 (predicted)                        | Zmym1_predicted     | 0.879  | 0.121 | 0.691 | 0.061 | 0.902  | 0.277 | 0.960  | 0.923 |
| 1380517_at   | BI288315  | zinc finger, MYM-type 3                                                 | Zmym3               | 0.472  | 0.134 | 0.666 | 0.184 | 0.884  | 0.646 | 0.784  | 0.823 |
| 1392846_at   | AA944574  | Zinc finger, MYND domain containing 11                                  | Zmynd11             | 1.068  | 0.816 | 1.623 | 0.075 | 0.954  | 0.864 | 0.851  | 0.280 |
| 1372068_at   | BI289543  | zinc finger, MYND domain containing 11                                  | Zmynd11             | 1.065  | 0.873 | 0.797 | 0.048 | 1.054  | 0.624 | 0.902  | 0.018 |
| 1391255_at   | BE110035  | zinc finger, MYND domain containing 15 (predicted)                      | Zmynd15_predicted   | 25.486 | 0.000 | 6.618 | 0.000 | 70.103 | 0.001 | 11.635 | 0.002 |
| 1389436_at   | AI236615  | zinc finger, MYND domain containing 17 (predicted)                      | Zmynd17_predicted   | 2.655  | 0.045 | 0.934 | 0.271 | 2.706  | 0.046 | 1.416  | 0.150 |
| 1391014_at   | AW530427  | zinc finger, MYND domain containing 19                                  | Zmynd19             | 1.012  | 0.416 | 1.073 | 0.851 | 0.766  | 0.115 | 0.990  | 0.697 |
| 1382416_at   | AI112428  | zinc finger, RAN-binding domain containing 1 (predicted)                | Zranb1_predicted    | 1.886  | 0.038 | 0.956 | 0.579 | 2.182  | 0.021 | 1.101  | 0.636 |
| 1393430_at   | BG668387  | zinc finger, RAN-binding domain containing 1 (predicted)                | Zranb1_predicted    | 1.118  | 0.154 | 1.340 | 0.059 | 1.039  | 0.949 | 1.042  | 0.797 |
| 1377816_at   | BG374857  | Zinc finger, RAN-binding domain containing 1 (predicted)                | Zranb1_predicted    | 0.828  | 0.348 | 1.754 | 0.023 | 1.453  | 0.257 | 1.540  | 0.626 |
| 1394087_at   | BF561962  | Zinc finger, RAN-binding domain containing 1 (predicted)                | Zranb1_predicted    | 1.239  | 0.455 | 1.533 | 0.115 | 1.486  | 0.057 | 1.463  | 0.142 |
| 1380755_at   | AW533897  | Zinc finger, RAN-binding domain containing 1 (predicted)                | Zranb1_predicted    | 1.627  | 0.855 | 1.691 | 0.043 | 1.306  | 0.951 | 1.286  | 0.160 |
| 1376113_at   | BI279683  | zinc finger, SWIM domain containing 1 (predicted)                       | Zswim1_predicted    | 0.806  | 0.149 | 0.957 | 0.590 | 0.602  | 0.397 | 0.790  | 0.509 |
| 1391972_a_at | BE108410  | zinc finger, SWIM domain containing 4 (predicted)                       | Zswim4_predicted    | 11.987 | 0.001 | 6.875 | 0.003 | 13.228 | 0.000 | 5.345  | 0.001 |
| 1380453_at   | AW530611  | zinc finger, SWIM domain containing 5 (predicted)                       | Zswim5_predicted    | 1.393  | 0.052 | 1.759 | 0.089 | 1.413  | 0.017 | 1.163  | 0.190 |
| 1384571_at   | BF398835  | zinc finger, SWIM domain containing 5 (predicted)                       | Zswim5_predicted    | 1.048  | 0.776 | 2.450 | 0.058 | 0.374  | 0.045 | 1.115  | 0.645 |
| 1385903_at   | AA859627  | Zinc finger, SWIM domain containing 6                                   | Zswim6              | 1.129  | 0.319 | 1.120 | 0.711 | 1.184  | 0.873 | 1.284  | 0.015 |
| 1394012_at   | BI303933  | zinc finger, SWIM domain containing 6                                   | Zswim6              | 1.600  | 0.797 | 1.007 | 0.771 | 1.636  | 0.215 | 1.200  | 0.103 |
| 1390205_at   | BE108876  | zinc finger, SWIM domain containing 6                                   | Zswim6              | 1.064  | 0.968 | 1.307 | 0.247 | 1.774  | 0.030 | 0.809  | 0.164 |
| 1375571_at   | AW251798  | Zinc finger, ZZ-type with EF hand domain 1 (predicted)                  | Zzef1_predicted     | 0.989  | 0.052 | 1.254 | 0.107 | 0.991  | 0.424 | 1.002  | 0.963 |
| 1389703_at   | BI295225  | Zinc finger, ZZ-type with EF hand domain 1 (predicted)                  | Zzef1_predicted     | 1.336  | 0.650 | 1.112 | 0.566 | 0.885  | 0.922 | 0.967  | 0.958 |
| 1394508_at   | AW523707  | Zinc fingers and homeoboxes 3                                           | Zhx3                | 1.007  | 0.752 | 0.999 | 0.987 | 0.999  | 0.075 | 0.999  | 0.504 |
| 1389080_at   | AI233457  | zinc responsive protein ZD7                                             | LOC474154           | 0.684  | 0.069 | 0.873 | 0.451 | 0.851  | 0.146 | 1.147  | 0.615 |
| 1374549_at   | AI317860  | zinc responsive protein ZD7                                             | LOC474154           | 0.853  | 0.144 | 1.078 | 0.676 | 0.960  | 0.045 | 0.959  | 0.833 |

|              |           |                                                           |         |         |       |         |       |         |       |         |       |
|--------------|-----------|-----------------------------------------------------------|---------|---------|-------|---------|-------|---------|-------|---------|-------|
| 1388590_at   | AI010455  | zinc ribbon domain containing, 1                          | Znrd1   | 1.481   | 0.470 | 2.539   | 0.017 | 1.136   | 0.136 | 1.941   | 0.007 |
| 1368175_at   | NM_133620 | zinc-fingers and homeoboxes 1                             | Zhx1    | 0.842   | 0.891 | 0.412   | 0.002 | 1.138   | 0.330 | 0.718   | 0.010 |
| 1399063_at   | BE105565  | ZUBR1                                                     | Rbaf600 | 0.748   | 0.169 | 0.597   | 0.099 | 0.969   | 0.200 | 0.771   | 0.098 |
| 1379025_at   | BF392966  | ZUBR1                                                     | Rbaf600 | 0.716   | 0.285 | 0.709   | 0.018 | 0.624   | 0.049 | 0.446   | 0.018 |
| 1374938_at   | BI295067  | ZW10 homolog, centromere/kinetochore protein (Drosophila) | Zw10    | 1.156   | 0.164 | 1.948   | 0.002 | 1.113   | 0.177 | 1.229   | 0.055 |
| 1370803_at   | AF439397  | ZW10 interactor                                           | Zwint   | 0.807   | 0.010 | 1.072   | 0.065 | 0.789   | 0.034 | 1.142   | 0.037 |
| 1383389_at   | BM388790  | zyg-11 homolog B (C. elegans)-like                        | Zygl1bl | 0.788   | 0.886 | 0.371   | 0.012 | 1.463   | 0.289 | 0.495   | 0.002 |
| 1396137_at   | BF567873  | zyg-11 homolog B (C. elegans)-like                        | Zygl1bl | 0.998   | 0.920 | 0.735   | 0.074 | 0.987   | 0.633 | 0.737   | 0.087 |
| 1388130_at   | AA943537  | zyxin                                                     | Zyx     | 5.324   | 0.002 | 4.776   | 0.011 | 1.191   | 0.642 | 2.188   | 0.029 |
| 1397304_at   | AW525366  | ---                                                       | ---     | 171.646 | 0.000 | 60.305  | 0.000 | 217.642 | 0.000 | 98.658  | 0.000 |
| 1380110_at   | AI229643  | ---                                                       | ---     | 12.280  | 0.000 | 7.266   | 0.000 | 14.905  | 0.000 | 9.558   | 0.003 |
| 1383448_at   | AI029121  | ---                                                       | ---     | 12.176  | 0.000 | 10.219  | 0.000 | 11.565  | 0.000 | 13.755  | 0.000 |
| 1393140_at   | AI574699  | ---                                                       | ---     | 47.380  | 0.000 | 22.729  | 0.008 | 6.742   | 0.094 | 3.922   | 0.048 |
| 1376151_a_at | AI407953  | ---                                                       | ---     | 26.907  | 0.000 | 10.468  | 0.001 | 49.288  | 0.000 | 16.071  | 0.004 |
| 1396209_at   | BE117343  | ---                                                       | ---     | 0.214   | 0.000 | 0.146   | 0.000 | 0.495   | 0.111 | 0.289   | 0.032 |
| 1371951_at   | AA800031  | ---                                                       | ---     | 37.149  | 0.000 | 28.617  | 0.000 | 5.449   | 0.077 | 7.047   | 0.003 |
| 1385641_at   | AI070558  | ---                                                       | ---     | 55.437  | 0.000 | 14.615  | 0.001 | 124.365 | 0.000 | 15.875  | 0.000 |
| 1378032_at   | AI176265  | ---                                                       | ---     | 12.908  | 0.000 | 13.480  | 0.002 | 9.856   | 0.001 | 10.708  | 0.002 |
| 1373672_at   | BM384419  | ---                                                       | ---     | 6.647   | 0.000 | 2.197   | 0.019 | 11.533  | 0.008 | 5.957   | 0.001 |
| 1384765_at   | BI289371  | ---                                                       | ---     | 13.233  | 0.000 | 15.381  | 0.000 | 12.908  | 0.000 | 12.985  | 0.000 |
| 1392978_at   | BE117086  | ---                                                       | ---     | 4.192   | 0.000 | 4.264   | 0.000 | 5.511   | 0.000 | 4.388   | 0.009 |
| 1393957_at   | AI548358  | ---                                                       | ---     | 34.087  | 0.000 | 25.305  | 0.000 | 34.492  | 0.001 | 26.803  | 0.002 |
| 1380570_at   | AI145593  | ---                                                       | ---     | 0.285   | 0.000 | 0.308   | 0.001 | 0.200   | 0.004 | 0.352   | 0.008 |
| 1384391_at   | BE096510  | ---                                                       | ---     | 14.839  | 0.000 | 8.153   | 0.004 | 15.984  | 0.001 | 3.707   | 0.002 |
| 1374615_at   | AI175668  | ---                                                       | ---     | 0.476   | 0.000 | 0.559   | 0.000 | 0.439   | 0.050 | 0.647   | 0.018 |
| 1389412_at   | AA800693  | ---                                                       | ---     | 0.281   | 0.000 | 0.203   | 0.002 | 0.156   | 0.000 | 0.184   | 0.015 |
| 1383650_at   | BI291080  | ---                                                       | ---     | 0.219   | 0.000 | 0.195   | 0.001 | 0.321   | 0.010 | 0.205   | 0.005 |
| 1372229_at   | AI179119  | ---                                                       | ---     | 0.209   | 0.000 | 0.089   | 0.005 | 0.542   | 0.130 | 0.486   | 0.082 |
| 1377626_at   | AA924350  | ---                                                       | ---     | 389.403 | 0.000 | 319.964 | 0.000 | 512.073 | 0.000 | 489.690 | 0.000 |
| 1378867_at   | BG374639  | ---                                                       | ---     | 12.083  | 0.000 | 1.690   | 0.108 | 3.346   | 0.138 | 1.045   | 0.803 |
| 1393469_at   | BE102340  | ---                                                       | ---     | 16.154  | 0.001 | 5.250   | 0.002 | 7.356   | 0.002 | 1.600   | 0.340 |
| 1373519_at   | AI412601  | ---                                                       | ---     | 0.282   | 0.001 | 0.463   | 0.000 | 0.538   | 0.056 | 0.413   | 0.020 |
| 1378927_at   | BE329364  | ---                                                       | ---     | 1.368   | 0.001 | 0.645   | 0.000 | 1.078   | 0.073 | 0.659   | 0.034 |
| 1384439_at   | BM385726  | ---                                                       | ---     | 0.799   | 0.001 | 2.145   | 0.028 | 0.411   | 0.013 | 1.670   | 0.002 |
| 1391280_at   | AW529333  | ---                                                       | ---     | 0.391   | 0.001 | 0.696   | 0.041 | 0.277   | 0.001 | 0.943   | 0.190 |
| 1380297_at   | AW915533  | ---                                                       | ---     | 2.358   | 0.001 | 1.001   | 0.174 | 4.838   | 0.002 | 1.364   | 0.182 |
| 1382143_at   | AA964898  | ---                                                       | ---     | 3.709   | 0.001 | 1.388   | 0.020 | 4.716   | 0.001 | 2.104   | 0.002 |
| 1373403_at   | AI230625  | ---                                                       | ---     | 13.423  | 0.001 | 21.660  | 0.007 | 56.055  | 0.002 | 78.351  | 0.005 |
| 1378980_at   | AI044779  | ---                                                       | ---     | 3.549   | 0.001 | 2.614   | 0.005 | 3.546   | 0.011 | 3.534   | 0.003 |
| 1396327_at   | BG374493  | ---                                                       | ---     | 43.482  | 0.001 | 12.579  | 0.003 | 38.832  | 0.005 | 25.192  | 0.004 |
| 1379541_at   | BE329099  | ---                                                       | ---     | 0.276   | 0.001 | 0.193   | 0.000 | 0.228   | 0.007 | 0.271   | 0.007 |
| 1390181_at   | BE115041  | ---                                                       | ---     | 0.426   | 0.001 | 0.483   | 0.149 | 0.417   | 0.058 | 0.790   | 0.461 |
| 1373864_at   | BM388810  | ---                                                       | ---     | 1.613   | 0.001 | 1.392   | 0.053 | 1.496   | 0.006 | 1.177   | 0.350 |
| 1382426_at   | AA997406  | ---                                                       | ---     | 0.587   | 0.002 | 1.088   | 0.396 | 0.710   | 0.082 | 0.861   | 0.329 |
| 1388464_at   | AI598527  | ---                                                       | ---     | 0.284   | 0.002 | 0.586   | 0.059 | 0.352   | 0.025 | 0.540   | 0.040 |
| 1393431_at   | AI500737  | ---                                                       | ---     | 0.753   | 0.002 | 1.124   | 0.185 | 0.709   | 0.141 | 0.993   | 0.409 |
| 1371871_at   | AI409731  | ---                                                       | ---     | 1.994   | 0.002 | 1.389   | 0.005 | 2.115   | 0.000 | 1.916   | 0.004 |
| 1373740_at   | AA851385  | ---                                                       | ---     | 0.070   | 0.002 | 0.172   | 0.004 | 0.084   | 0.000 | 0.107   | 0.003 |
| 1390432_at   | AA997338  | ---                                                       | ---     | 0.323   | 0.002 | 0.158   | 0.000 | 0.414   | 0.008 | 0.171   | 0.008 |
| 1390932_at   | AA875255  | ---                                                       | ---     | 0.759   | 0.002 | 0.988   | 0.853 | 0.767   | 0.004 | 0.998   | 0.958 |
| 1397375_at   | BM384537  | ---                                                       | ---     | 0.381   | 0.002 | 0.525   | 0.064 | 0.417   | 0.021 | 0.471   | 0.067 |
| 1372826_at   | BI285718  | ---                                                       | ---     | 6.837   | 0.002 | 4.913   | 0.000 | 5.067   | 0.000 | 3.238   | 0.020 |
| 1376880_at   | AI639447  | ---                                                       | ---     | 2.222   | 0.002 | 1.858   | 0.016 | 2.657   | 0.000 | 1.753   | 0.014 |
| 1374157_at   | AA858930  | ---                                                       | ---     | 4.851   | 0.002 | 1.849   | 0.042 | 3.515   | 0.059 | 1.449   | 0.022 |
| 1371736_at   | AI411283  | ---                                                       | ---     | 0.353   | 0.002 | 0.349   | 0.001 | 0.486   | 0.000 | 0.349   | 0.005 |
| 1383254_at   | BF403169  | ---                                                       | ---     | 0.232   | 0.002 | 0.205   | 0.000 | 0.546   | 0.005 | 0.182   | 0.005 |
| 1377117_at   | BF387780  | ---                                                       | ---     | 3.157   | 0.003 | 2.032   | 0.003 | 3.045   | 0.001 | 2.018   | 0.003 |
| 1389155_at   | AA943139  | ---                                                       | ---     | 0.422   | 0.003 | 0.668   | 0.005 | 0.627   | 0.028 | 0.751   | 0.051 |
| 1374592_at   | BI282671  | ---                                                       | ---     | 0.295   | 0.003 | 0.479   | 0.004 | 0.347   | 0.050 | 0.626   | 0.081 |
| 1379724_at   | BE103244  | ---                                                       | ---     | 0.260   | 0.003 | 0.255   | 0.001 | 0.329   | 0.011 | 0.244   | 0.005 |
| 1372812_at   | H33148    | ---                                                       | ---     | 1.826   | 0.003 | 1.693   | 0.022 | 1.421   | 0.028 | 1.374   | 0.023 |

|              |          |     |     |       |       |        |       |        |       |        |       |
|--------------|----------|-----|-----|-------|-------|--------|-------|--------|-------|--------|-------|
| 1377380_at   | AI060045 | --- | --- | 2.610 | 0.003 | 0.950  | 0.405 | 3.690  | 0.000 | 1.898  | 0.239 |
| 1386114_at   | BF550033 | --- | --- | 0.216 | 0.003 | 0.085  | 0.001 | 0.385  | 0.108 | 0.121  | 0.035 |
| 1374432_at   | BE118251 | --- | --- | 1.565 | 0.004 | 0.574  | 0.014 | 1.734  | 0.001 | 0.564  | 0.000 |
| 1398625_at   | BG673169 | --- | --- | 0.561 | 0.004 | 0.572  | 0.000 | 0.477  | 0.025 | 0.887  | 0.195 |
| 1391560_at   | AI237082 | --- | --- | 1.801 | 0.004 | 1.807  | 0.016 | 1.970  | 0.003 | 1.579  | 0.015 |
| 1396252_at   | BE117174 | --- | --- | 0.591 | 0.004 | 0.340  | 0.004 | 0.447  | 0.005 | 0.232  | 0.045 |
| 1374526_at   | BF396420 | --- | --- | 2.426 | 0.004 | 1.332  | 0.004 | 2.769  | 0.003 | 1.833  | 0.001 |
| 1390851_at   | AA799676 | --- | --- | 0.685 | 0.004 | 0.609  | 0.001 | 0.796  | 0.007 | 0.914  | 0.132 |
| 1382277_at   | AA894336 | --- | --- | 5.708 | 0.004 | 4.674  | 0.000 | 4.848  | 0.010 | 4.541  | 0.016 |
| 1383150_at   | BE114751 | --- | --- | 0.531 | 0.004 | 0.618  | 0.027 | 0.475  | 0.008 | 0.739  | 0.086 |
| 1374522_at   | BG670847 | --- | --- | 0.547 | 0.004 | 0.591  | 0.004 | 0.658  | 0.029 | 0.688  | 0.021 |
| 1386695_at   | BF565756 | --- | --- | 6.290 | 0.004 | 3.953  | 0.178 | 19.899 | 0.003 | 16.401 | 0.020 |
| 1376618_at   | AI236218 | --- | --- | 1.553 | 0.004 | 2.188  | 0.020 | 2.199  | 0.001 | 1.944  | 0.011 |
| 1393365_at   | AW433625 | --- | --- | 2.382 | 0.005 | 1.238  | 0.069 | 6.193  | 0.007 | 1.484  | 0.014 |
| 1389913_at   | BI276990 | --- | --- | 3.239 | 0.005 | 2.172  | 0.091 | 3.658  | 0.003 | 2.316  | 0.068 |
| 1397703_at   | BF288942 | --- | --- | 2.755 | 0.005 | 0.822  | 0.271 | 4.037  | 0.000 | 1.325  | 0.190 |
| 1383642_at   | BG374114 | --- | --- | 0.435 | 0.005 | 0.411  | 0.029 | 0.408  | 0.008 | 0.600  | 0.065 |
| 1378501_at   | BE113386 | --- | --- | 1.459 | 0.005 | 1.140  | 0.084 | 1.193  | 0.138 | 1.271  | 0.943 |
| 1385210_at   | BF389450 | --- | --- | 4.714 | 0.005 | 11.737 | 0.000 | 2.500  | 0.007 | 9.680  | 0.005 |
| 1399140_at   | AA965202 | --- | --- | 1.582 | 0.005 | 2.453  | 0.017 | 1.359  | 0.032 | 2.975  | 0.000 |
| 1389053_at   | AI171280 | --- | --- | 1.684 | 0.005 | 2.733  | 0.009 | 3.686  | 0.002 | 3.773  | 0.001 |
| 1389022_at   | AI102760 | --- | --- | 2.672 | 0.006 | 2.513  | 0.016 | 3.088  | 0.001 | 2.755  | 0.010 |
| 1385577_at   | AW531898 | --- | --- | 0.363 | 0.006 | 0.431  | 0.005 | 0.368  | 0.027 | 0.423  | 0.032 |
| 1371972_at   | BM388888 | --- | --- | 3.288 | 0.006 | 4.356  | 0.001 | 2.949  | 0.008 | 3.006  | 0.001 |
| 1383533_at   | AI715743 | --- | --- | 2.107 | 0.006 | 1.102  | 0.167 | 1.843  | 0.045 | 0.795  | 0.573 |
| 1381190_at   | AI598833 | --- | --- | 0.373 | 0.006 | 0.758  | 0.030 | 0.523  | 0.132 | 0.777  | 0.022 |
| 1373638_at   | BG380827 | --- | --- | 0.417 | 0.006 | 0.360  | 0.009 | 0.398  | 0.018 | 0.380  | 0.021 |
| 1389261_at   | BI290739 | --- | --- | 3.246 | 0.006 | 1.085  | 0.406 | 1.212  | 0.993 | 1.365  | 0.282 |
| 1374300_at   | AA997139 | --- | --- | 0.498 | 0.006 | 0.756  | 0.129 | 0.507  | 0.026 | 0.561  | 0.030 |
| 1371990_at   | AI012242 | --- | --- | 0.184 | 0.007 | 0.060  | 0.021 | 0.466  | 0.117 | 0.305  | 0.066 |
| 1391574_at   | AW253369 | --- | --- | 2.512 | 0.007 | 1.024  | 0.352 | 3.133  | 0.001 | 1.322  | 0.084 |
| 1386669_at   | BF565188 | --- | --- | 0.474 | 0.007 | 1.546  | 0.030 | 0.456  | 0.004 | 1.356  | 0.069 |
| 1374940_at   | BM388945 | --- | --- | 0.530 | 0.007 | 0.636  | 0.006 | 0.518  | 0.008 | 0.658  | 0.008 |
| 1374002_at   | AI045904 | --- | --- | 0.769 | 0.007 | 0.368  | 0.094 | 0.623  | 0.022 | 0.439  | 0.157 |
| 1389306_at   | BM387419 | --- | --- | 0.320 | 0.007 | 0.103  | 0.001 | 0.472  | 0.098 | 0.156  | 0.001 |
| 1376136_at   | BI296118 | --- | --- | 0.390 | 0.007 | 0.513  | 0.003 | 0.464  | 0.071 | 0.957  | 0.732 |
| 1372456_at   | AI171229 | --- | --- | 0.796 | 0.008 | 0.957  | 0.835 | 0.996  | 0.119 | 1.027  | 0.242 |
| 1377856_at   | BE113045 | --- | --- | 0.488 | 0.008 | 0.246  | 0.001 | 0.332  | 0.001 | 0.310  | 0.003 |
| 1393952_at   | BI278833 | --- | --- | 0.145 | 0.008 | 0.044  | 0.000 | 0.241  | 0.003 | 0.055  | 0.006 |
| 1386140_at   | AI235950 | --- | --- | 0.463 | 0.008 | 0.548  | 0.055 | 0.565  | 0.037 | 0.428  | 0.037 |
| 1388509_at   | BI274303 | --- | --- | 2.068 | 0.008 | 4.189  | 0.008 | 1.163  | 0.335 | 3.158  | 0.004 |
| 1378302_at   | BF403965 | --- | --- | 8.078 | 0.009 | 1.820  | 0.004 | 18.099 | 0.005 | 3.291  | 0.005 |
| 1376108_at   | AI030915 | --- | --- | 0.551 | 0.009 | 1.019  | 0.667 | 0.841  | 0.052 | 1.419  | 0.149 |
| 1385107_at   | AI137961 | --- | --- | 7.155 | 0.009 | 1.402  | 0.048 | 1.413  | 0.526 | 1.075  | 0.684 |
| 1383649_a_at | BI291080 | --- | --- | 0.085 | 0.009 | 0.132  | 0.012 | 0.450  | 0.105 | 0.246  | 0.002 |
| 1382094_at   | BI285519 | --- | --- | 1.757 | 0.009 | 0.751  | 0.022 | 1.829  | 0.001 | 0.947  | 0.813 |
| 1371333_at   | AI180251 | --- | --- | 0.765 | 0.009 | 0.541  | 0.005 | 0.765  | 0.163 | 0.496  | 0.016 |
| 1396755_at   | BF399394 | --- | --- | 9.697 | 0.009 | 2.749  | 0.004 | 13.653 | 0.012 | 3.851  | 0.005 |
| 1395544_at   | BG666601 | --- | --- | 0.469 | 0.009 | 0.924  | 0.211 | 0.696  | 0.043 | 0.769  | 0.129 |
| 1376625_at   | BI296015 | --- | --- | 1.905 | 0.009 | 2.219  | 0.143 | 1.760  | 0.032 | 1.466  | 0.199 |
| 1374740_at   | BF408740 | --- | --- | 1.240 | 0.010 | 0.929  | 0.543 | 1.780  | 0.027 | 1.018  | 0.939 |
| 1388781_at   | AW434329 | --- | --- | 1.503 | 0.010 | 0.699  | 0.106 | 1.535  | 0.013 | 0.913  | 0.576 |
| 1372104_at   | BF289002 | --- | --- | 0.397 | 0.010 | 0.426  | 0.019 | 0.444  | 0.014 | 0.421  | 0.010 |
| 1389015_at   | AI171982 | --- | --- | 0.348 | 0.010 | 0.919  | 0.363 | 0.436  | 0.029 | 0.663  | 0.152 |
| 1391305_at   | AI576233 | --- | --- | 0.345 | 0.010 | 0.543  | 0.033 | 0.303  | 0.011 | 0.434  | 0.014 |
| 1373494_at   | BE120831 | --- | --- | 2.633 | 0.011 | 3.090  | 0.004 | 2.407  | 0.000 | 3.445  | 0.000 |
| 1389500_at   | BM383122 | --- | --- | 4.414 | 0.011 | 7.338  | 0.000 | 2.515  | 0.010 | 3.624  | 0.002 |
| 1378203_at   | BE102273 | --- | --- | 1.258 | 0.011 | 1.454  | 0.032 | 1.062  | 0.229 | 1.129  | 0.116 |
| 1372719_at   | BF283702 | --- | --- | 3.400 | 0.011 | 1.707  | 0.005 | 3.085  | 0.004 | 1.469  | 0.025 |
| 1385218_at   | AI044551 | --- | --- | 2.773 | 0.011 | 2.247  | 0.506 | 2.143  | 0.009 | 1.223  | 0.484 |
| 1391546_at   | AI412209 | --- | --- | 0.224 | 0.011 | 0.142  | 0.001 | 0.311  | 0.021 | 0.221  | 0.011 |

|              |          |     |     |        |       |        |       |       |       |        |       |
|--------------|----------|-----|-----|--------|-------|--------|-------|-------|-------|--------|-------|
| 1372955_at   | BI282720 | --- | --- | 1.250  | 0.011 | 1.777  | 0.064 | 1.086 | 0.204 | 1.120  | 0.391 |
| 1383675_at   | BG371620 | --- | --- | 0.442  | 0.011 | 1.977  | 0.274 | 0.493 | 0.009 | 1.185  | 0.528 |
| 1383285_at   | BG671375 | --- | --- | 5.581  | 0.012 | 12.434 | 0.001 | 1.680 | 0.275 | 1.833  | 0.031 |
| 1397828_at   | BF387796 | --- | --- | 1.575  | 0.012 | 0.501  | 0.044 | 2.772 | 0.011 | 0.796  | 0.629 |
| 1393234_at   | BI285850 | --- | --- | 10.758 | 0.012 | 7.973  | 0.000 | 7.271 | 0.002 | 6.700  | 0.006 |
| 1373921_at   | AI169007 | --- | --- | 0.284  | 0.012 | 0.664  | 0.120 | 0.892 | 0.127 | 1.101  | 0.237 |
| 1389511_s_at | BF403383 | --- | --- | 0.417  | 0.012 | 0.549  | 0.040 | 0.482 | 0.042 | 0.731  | 0.048 |
| 1390465_at   | AW534554 | --- | --- | 0.660  | 0.013 | 0.861  | 0.101 | 0.801 | 0.025 | 0.755  | 0.037 |
| 1370899_at   | AI599699 | --- | --- | 0.418  | 0.013 | 0.403  | 0.009 | 0.477 | 0.004 | 0.302  | 0.066 |
| 1374100_at   | AI102771 | --- | --- | 0.711  | 0.013 | 0.513  | 0.002 | 1.250 | 0.378 | 0.884  | 0.192 |
| 1372141_at   | BI289500 | --- | --- | 0.814  | 0.013 | 1.391  | 0.084 | 0.863 | 0.481 | 1.291  | 0.152 |
| 1373300_at   | BI296249 | --- | --- | 0.536  | 0.013 | 0.356  | 0.001 | 0.479 | 0.007 | 0.348  | 0.003 |
| 1375672_at   | BG380279 | --- | --- | 0.324  | 0.013 | 0.482  | 0.008 | 0.865 | 0.249 | 0.747  | 0.061 |
| 1383025_at   | BE097791 | --- | --- | 2.691  | 0.013 | 11.017 | 0.000 | 0.850 | 0.195 | 9.593  | 0.000 |
| 1388204_at   | M60616   | --- | --- | 14.992 | 0.013 | 22.555 | 0.016 | 4.363 | 0.014 | 7.489  | 0.058 |
| 1372905_at   | AW433888 | --- | --- | 1.521  | 0.013 | 1.652  | 0.002 | 0.851 | 0.779 | 1.371  | 0.025 |
| 1373936_at   | AI407107 | --- | --- | 1.419  | 0.013 | 1.220  | 0.358 | 1.391 | 0.043 | 1.312  | 0.153 |
| 1384116_at   | AA924216 | --- | --- | 10.630 | 0.014 | 3.654  | 0.010 | 7.753 | 0.000 | 3.370  | 0.001 |
| 1373788_at   | BE097533 | --- | --- | 0.572  | 0.014 | 1.345  | 0.184 | 0.405 | 0.076 | 1.371  | 0.356 |
| 1383173_at   | BI281630 | --- | --- | 0.391  | 0.014 | 0.143  | 0.000 | 0.617 | 0.037 | 0.306  | 0.001 |
| 1371963_at   | BF395042 | --- | --- | 0.662  | 0.015 | 0.609  | 0.040 | 0.704 | 0.096 | 0.648  | 0.008 |
| 1373506_at   | AA944568 | --- | --- | 1.682  | 0.015 | 0.339  | 0.000 | 1.677 | 0.012 | 0.357  | 0.014 |
| 1393000_at   | AI045970 | --- | --- | 0.251  | 0.015 | 0.357  | 0.000 | 0.382 | 0.034 | 0.498  | 0.028 |
| 1390070_at   | BI296990 | --- | --- | 0.492  | 0.015 | 1.156  | 0.190 | 0.553 | 0.123 | 0.862  | 0.459 |
| 1389596_at   | BM389642 | --- | --- | 0.605  | 0.015 | 1.428  | 0.019 | 0.587 | 0.120 | 1.290  | 0.049 |
| 1374811_at   | AA858705 | --- | --- | 0.455  | 0.015 | 1.371  | 0.015 | 0.703 | 0.012 | 1.106  | 0.024 |
| 1384288_at   | BI292470 | --- | --- | 1.362  | 0.015 | 0.820  | 0.174 | 1.994 | 0.038 | 1.144  | 0.060 |
| 1392347_at   | AW527765 | --- | --- | 0.679  | 0.016 | 0.995  | 0.956 | 0.743 | 0.118 | 1.001  | 0.973 |
| 1396386_at   | BF408665 | --- | --- | 3.881  | 0.016 | 9.502  | 0.007 | 3.541 | 0.006 | 4.885  | 0.004 |
| 1377124_at   | AA964824 | --- | --- | 2.067  | 0.017 | 1.323  | 0.010 | 1.896 | 0.003 | 1.425  | 0.001 |
| 1388271_at   | BM383531 | --- | --- | 5.782  | 0.017 | 58.245 | 0.005 | 8.619 | 0.029 | 65.868 | 0.006 |
| 1379854_at   | AA996933 | --- | --- | 2.948  | 0.017 | 10.954 | 0.001 | 1.402 | 0.028 | 5.296  | 0.016 |
| 1389003_at   | BI282008 | --- | --- | 0.208  | 0.018 | 0.244  | 0.032 | 0.457 | 0.164 | 0.230  | 0.031 |
| 1379546_at   | AA875623 | --- | --- | 1.884  | 0.018 | 2.210  | 0.454 | 1.188 | 0.095 | 1.398  | 0.473 |
| 1390204_at   | AI227856 | --- | --- | 2.186  | 0.018 | 1.001  | 0.292 | 3.630 | 0.002 | 0.965  | 0.913 |
| 1383215_at   | BF557467 | --- | --- | 0.335  | 0.018 | 0.114  | 0.000 | 0.336 | 0.027 | 0.098  | 0.001 |
| 1390103_at   | BE095970 | --- | --- | 1.497  | 0.018 | 1.502  | 0.091 | 1.914 | 0.010 | 1.159  | 0.146 |
| 1391454_at   | BF286105 | --- | --- | 0.702  | 0.018 | 0.613  | 0.015 | 1.118 | 0.521 | 0.751  | 0.014 |
| 1384634_at   | AI235340 | --- | --- | 0.867  | 0.019 | 0.937  | 0.963 | 0.941 | 0.390 | 0.978  | 0.887 |
| 1395623_at   | AW521959 | --- | --- | 0.366  | 0.019 | 0.788  | 0.112 | 0.846 | 0.480 | 0.751  | 0.776 |
| 1378582_at   | BM383666 | --- | --- | 0.489  | 0.019 | 0.371  | 0.000 | 0.772 | 0.099 | 0.418  | 0.008 |
| 1374696_at   | AI170182 | --- | --- | 2.130  | 0.019 | 2.340  | 0.004 | 3.655 | 0.011 | 3.743  | 0.008 |
| 1373379_at   | BF396350 | --- | --- | 0.655  | 0.019 | 1.034  | 0.214 | 0.607 | 0.029 | 0.997  | 0.746 |
| 1379316_at   | BG373832 | --- | --- | 1.845  | 0.019 | 1.041  | 0.995 | 2.843 | 0.006 | 1.587  | 0.086 |
| 1373422_at   | BE108280 | --- | --- | 1.513  | 0.019 | 1.846  | 0.005 | 1.485 | 0.039 | 2.038  | 0.008 |
| 1383326_a_at | AI576297 | --- | --- | 0.552  | 0.020 | 0.444  | 0.000 | 0.603 | 0.030 | 0.457  | 0.046 |
| 1383011_at   | AI501182 | --- | --- | 1.623  | 0.020 | 1.865  | 0.013 | 1.618 | 0.037 | 1.697  | 0.000 |
| 1375417_at   | BM391419 | --- | --- | 1.618  | 0.020 | 0.699  | 0.169 | 1.225 | 0.099 | 0.778  | 0.879 |
| 1393048_at   | BF561277 | --- | --- | 0.261  | 0.020 | 0.071  | 0.000 | 0.166 | 0.005 | 0.094  | 0.060 |
| 1381525_at   | BF419130 | --- | --- | 2.983  | 0.020 | 1.577  | 0.005 | 2.734 | 0.010 | 1.658  | 0.011 |
| 1385940_at   | AI102967 | --- | --- | 0.657  | 0.020 | 0.959  | 0.939 | 0.795 | 0.118 | 0.971  | 0.851 |
| 1379453_a_at | AI072423 | --- | --- | 1.774  | 0.020 | 0.846  | 0.300 | 1.113 | 0.337 | 0.750  | 0.468 |
| 1376680_at   | BG379765 | --- | --- | 2.767  | 0.021 | 7.866  | 0.003 | 3.737 | 0.007 | 4.886  | 0.001 |
| 1381234_at   | BF398454 | --- | --- | 5.080  | 0.021 | 1.396  | 0.128 | 3.265 | 0.015 | 1.491  | 0.207 |
| 1380796_at   | AW521390 | --- | --- | 1.480  | 0.021 | 1.010  | 0.110 | 2.047 | 0.024 | 1.145  | 0.155 |
| 1373610_at   | AI232694 | --- | --- | 0.453  | 0.021 | 0.525  | 0.011 | 0.591 | 0.092 | 0.634  | 0.004 |
| 1373216_at   | AI236521 | --- | --- | 0.522  | 0.021 | 0.292  | 0.008 | 0.332 | 0.005 | 0.677  | 0.065 |
| 1372322_at   | BF398016 | --- | --- | 0.552  | 0.021 | 0.533  | 0.014 | 0.572 | 0.025 | 0.665  | 0.014 |
| 1383753_at   | BF401106 | --- | --- | 0.607  | 0.021 | 0.656  | 0.074 | 0.722 | 0.179 | 0.556  | 0.028 |
| 1397953_at   | AI113261 | --- | --- | 1.881  | 0.021 | 1.995  | 0.022 | 2.894 | 0.015 | 2.517  | 0.008 |
| 1374690_at   | AI599770 | --- | --- | 3.595  | 0.021 | 1.643  | 0.007 | 4.958 | 0.009 | 1.991  | 0.003 |



|              |           |     |     |       |       |       |       |       |       |       |       |
|--------------|-----------|-----|-----|-------|-------|-------|-------|-------|-------|-------|-------|
| 1373254_at   | BI282479  | --- | --- | 0.313 | 0.022 | 0.920 | 0.542 | 1.114 | 0.833 | 0.992 | 0.929 |
| 1385800_at   | AW531915  | --- | --- | 2.443 | 0.022 | 2.093 | 0.013 | 1.853 | 0.148 | 1.374 | 0.400 |
| 1393095_at   | BI276113  | --- | --- | 2.722 | 0.022 | 1.165 | 0.352 | 3.685 | 0.001 | 1.375 | 0.060 |
| 1389427_at   | BM386487  | --- | --- | 3.811 | 0.022 | 2.243 | 0.081 | 2.288 | 0.015 | 1.537 | 0.036 |
| 1374044_at   | AA850698  | --- | --- | 0.718 | 0.022 | 0.809 | 0.027 | 0.760 | 0.009 | 0.992 | 0.095 |
| 1376825_at   | BF557258  | --- | --- | 0.479 | 0.022 | 0.377 | 0.001 | 0.873 | 0.349 | 0.391 | 0.002 |
| 1379763_at   | BE111542  | --- | --- | 1.968 | 0.022 | 1.413 | 0.029 | 2.311 | 0.029 | 1.439 | 0.028 |
| 1394047_at   | BE107848  | --- | --- | 4.373 | 0.022 | 1.618 | 0.029 | 3.486 | 0.035 | 1.295 | 0.019 |
| 1382022_at   | BF285121  | --- | --- | 2.968 | 0.023 | 1.059 | 0.274 | 3.142 | 0.023 | 1.344 | 0.065 |
| 1393905_at   | AI145446  | --- | --- | 2.181 | 0.023 | 0.901 | 0.615 | 1.022 | 0.836 | 0.998 | 0.840 |
| 1373193_at   | BE108670  | --- | --- | 0.694 | 0.024 | 0.492 | 0.011 | 0.604 | 0.024 | 0.569 | 0.033 |
| 1388401_at   | BI296155  | --- | --- | 2.009 | 0.024 | 1.706 | 0.102 | 1.801 | 0.372 | 1.507 | 0.033 |
| 1371731_at   | AI408151  | --- | --- | 0.097 | 0.024 | 0.414 | 0.012 | 0.049 | 0.001 | 0.468 | 0.027 |
| 1377249_at   | AW526060  | --- | --- | 0.263 | 0.024 | 0.265 | 0.002 | 0.260 | 0.016 | 0.471 | 0.018 |
| 1369094_a_at | NM_019140 | --- | --- | 0.792 | 0.024 | 0.403 | 0.001 | 0.823 | 0.004 | 0.411 | 0.005 |
| 1391682_at   | AI169812  | --- | --- | 1.970 | 0.025 | 1.224 | 0.559 | 1.004 | 0.471 | 1.713 | 0.484 |
| 1374390_at   | AI716420  | --- | --- | 0.579 | 0.026 | 0.967 | 0.792 | 0.441 | 0.088 | 0.638 | 0.561 |
| 1389418_at   | AI410452  | --- | --- | 2.573 | 0.026 | 0.602 | 0.007 | 2.932 | 0.002 | 1.402 | 0.014 |
| 1389429_at   | AA925367  | --- | --- | 0.784 | 0.026 | 0.273 | 0.015 | 1.122 | 0.170 | 0.621 | 0.055 |
| 1374499_at   | BM383402  | --- | --- | 2.989 | 0.027 | 1.680 | 0.006 | 4.914 | 0.001 | 2.610 | 0.004 |
| 1372770_at   | BF281357  | --- | --- | 1.743 | 0.028 | 1.749 | 0.085 | 4.127 | 0.033 | 3.141 | 0.007 |
| 1382020_at   | BE105500  | --- | --- | 1.795 | 0.028 | 1.349 | 0.233 | 1.501 | 0.015 | 0.899 | 0.914 |
| 1392368_at   | BE117273  | --- | --- | 1.869 | 0.028 | 1.669 | 0.298 | 1.515 | 0.061 | 1.705 | 0.434 |
| 1392584_at   | BF415201  | --- | --- | 0.679 | 0.028 | 0.982 | 0.241 | 0.665 | 0.044 | 1.000 | 0.987 |
| 1371806_at   | BI283794  | --- | --- | 0.584 | 0.029 | 0.465 | 0.024 | 0.772 | 0.113 | 0.536 | 0.195 |
| 1370176_at   | BG378620  | --- | --- | 0.506 | 0.029 | 0.470 | 0.006 | 0.423 | 0.029 | 0.458 | 0.012 |
| 1377980_at   | AI549077  | --- | --- | 0.308 | 0.029 | 0.186 | 0.004 | 0.549 | 0.023 | 0.309 | 0.009 |
| 1390154_at   | BI299824  | --- | --- | 3.199 | 0.029 | 1.606 | 0.130 | 1.651 | 0.149 | 1.421 | 0.974 |
| 1371842_at   | AI227747  | --- | --- | 0.898 | 0.029 | 0.891 | 0.092 | 0.627 | 0.002 | 0.880 | 0.734 |
| 1399037_at   | AI227962  | --- | --- | 0.586 | 0.030 | 0.930 | 0.651 | 0.518 | 0.001 | 0.567 | 0.243 |
| 1384227_at   | AI044031  | --- | --- | 0.598 | 0.030 | 0.681 | 0.000 | 0.855 | 0.248 | 0.681 | 0.048 |
| 1394793_at   | AI715674  | --- | --- | 0.601 | 0.030 | 0.262 | 0.001 | 0.872 | 0.424 | 0.318 | 0.004 |
| 1371717_at   | AA943135  | --- | --- | 1.367 | 0.030 | 2.062 | 0.003 | 1.543 | 0.002 | 2.224 | 0.003 |
| 1371911_at   | BM390023  | --- | --- | 1.854 | 0.031 | 1.316 | 0.003 | 1.606 | 0.002 | 1.327 | 0.050 |
| 1382989_at   | BE116242  | --- | --- | 0.737 | 0.031 | 0.302 | 0.000 | 0.810 | 0.062 | 0.286 | 0.004 |
| 1390151_at   | BM392146  | --- | --- | 0.447 | 0.031 | 0.274 | 0.001 | 0.617 | 0.014 | 0.497 | 0.002 |
| 1383384_at   | BG381725  | --- | --- | 0.803 | 0.031 | 0.453 | 0.002 | 1.022 | 0.200 | 0.572 | 0.037 |
| 1373419_at   | AI556884  | --- | --- | 2.493 | 0.032 | 0.703 | 0.633 | 2.090 | 0.017 | 1.212 | 0.554 |
| 1373755_at   | AI717543  | --- | --- | 1.390 | 0.032 | 1.087 | 0.469 | 1.006 | 0.394 | 0.562 | 0.033 |
| 1388982_at   | BM389066  | --- | --- | 0.623 | 0.033 | 0.474 | 0.000 | 0.540 | 0.010 | 0.461 | 0.005 |
| 1385219_a_at | AI071110  | --- | --- | 0.960 | 0.033 | 0.977 | 0.924 | 0.750 | 0.037 | 1.549 | 0.065 |
| 1394909_at   | BF387551  | --- | --- | 2.146 | 0.033 | 1.091 | 0.814 | 1.040 | 0.909 | 0.867 | 0.549 |
| 1389439_at   | AI172618  | --- | --- | 1.499 | 0.034 | 3.264 | 0.000 | 1.318 | 0.036 | 2.020 | 0.023 |
| 1391643_at   | BI290758  | --- | --- | 1.469 | 0.034 | 0.704 | 0.017 | 1.004 | 0.986 | 0.549 | 0.050 |
| 1384659_at   | AI058540  | --- | --- | 1.537 | 0.034 | 0.849 | 0.914 | 0.985 | 0.601 | 1.196 | 0.183 |
| 1383382_at   | BI294931  | --- | --- | 0.803 | 0.034 | 0.330 | 0.001 | 0.914 | 0.083 | 0.436 | 0.029 |
| 1391333_at   | AI602218  | --- | --- | 0.986 | 0.034 | 1.596 | 0.032 | 0.746 | 0.024 | 1.094 | 0.109 |
| 1395287_at   | BE119914  | --- | --- | 0.774 | 0.034 | 1.002 | 0.987 | 0.797 | 0.057 | 0.992 | 0.416 |
| 1377283_at   | BI274486  | --- | --- | 0.552 | 0.034 | 0.299 | 0.004 | 0.531 | 0.062 | 0.316 | 0.007 |
| 1379651_at   | BE109884  | --- | --- | 2.596 | 0.034 | 0.967 | 0.574 | 1.881 | 0.121 | 0.749 | 0.290 |
| 1384169_a_at | AA900477  | --- | --- | 1.243 | 0.035 | 0.512 | 0.005 | 1.066 | 0.576 | 0.462 | 0.005 |
| 1382255_at   | BE110785  | --- | --- | 3.725 | 0.035 | 2.333 | 0.006 | 5.422 | 0.000 | 2.214 | 0.002 |
| 1372345_at   | AA894210  | --- | --- | 0.247 | 0.035 | 0.221 | 0.013 | 0.169 | 0.003 | 0.184 | 0.002 |
| 1383879_at   | BG377332  | --- | --- | 0.696 | 0.035 | 0.809 | 0.979 | 0.633 | 0.113 | 0.811 | 0.543 |
| 1388254_a_at | AJ243338  | --- | --- | 1.841 | 0.035 | 1.367 | 0.989 | 1.822 | 0.035 | 1.884 | 0.107 |
| 1378663_at   | BF401737  | --- | --- | 2.502 | 0.035 | 1.363 | 0.043 | 1.021 | 0.847 | 1.283 | 0.054 |
| 1388540_at   | BM390828  | --- | --- | 0.694 | 0.036 | 0.849 | 0.442 | 0.656 | 0.007 | 0.733 | 0.132 |
| 1371793_at   | AI008697  | --- | --- | 0.408 | 0.036 | 0.464 | 0.016 | 0.281 | 0.028 | 0.553 | 0.019 |
| 1373450_at   | AI409857  | --- | --- | 0.486 | 0.036 | 0.535 | 0.013 | 0.577 | 0.143 | 0.623 | 0.042 |
| 1381918_at   | AI144776  | --- | --- | 1.002 | 0.037 | 0.999 | 0.984 | 1.016 | 0.539 | 0.999 | 0.986 |
| 1375453_at   | BM392052  | --- | --- | 0.639 | 0.037 | 0.887 | 0.194 | 0.732 | 0.382 | 0.867 | 0.666 |

|              |          |     |     |       |       |       |       |       |       |        |       |
|--------------|----------|-----|-----|-------|-------|-------|-------|-------|-------|--------|-------|
| 1378191_at   | AI549102 | --- | --- | 0.404 | 0.037 | 0.545 | 0.031 | 0.354 | 0.047 | 0.498  | 0.132 |
| 1399131_at   | AI703580 | --- | --- | 0.450 | 0.037 | 0.634 | 0.056 | 0.539 | 0.001 | 0.666  | 0.025 |
| 1392312_at   | BG375255 | --- | --- | 1.330 | 0.038 | 1.050 | 0.609 | 2.490 | 0.157 | 1.131  | 0.644 |
| 1390592_at   | BM389412 | --- | --- | 0.747 | 0.038 | 1.825 | 0.084 | 0.702 | 0.094 | 0.962  | 0.646 |
| 1384183_at   | AA996869 | --- | --- | 0.394 | 0.038 | 0.766 | 0.715 | 0.425 | 0.071 | 0.751  | 0.045 |
| 1373491_at   | BI276464 | --- | --- | 0.684 | 0.038 | 0.766 | 0.044 | 0.812 | 0.161 | 0.524  | 0.014 |
| 1382374_at   | AA875017 | --- | --- | 0.588 | 0.038 | 0.494 | 0.109 | 0.552 | 0.026 | 0.687  | 0.311 |
| 1381224_at   | AI502861 | --- | --- | 0.735 | 0.038 | 1.024 | 0.506 | 0.746 | 0.031 | 0.942  | 0.798 |
| 1384275_at   | BI300393 | --- | --- | 0.472 | 0.038 | 0.292 | 0.000 | 0.474 | 0.048 | 0.293  | 0.002 |
| 1391632_at   | AA964568 | --- | --- | 0.744 | 0.038 | 2.208 | 0.002 | 0.598 | 0.003 | 1.742  | 0.035 |
| 1388501_at   | AW916335 | --- | --- | 2.453 | 0.039 | 1.751 | 0.004 | 3.045 | 0.014 | 2.571  | 0.000 |
| 1393330_at   | AI137898 | --- | --- | 0.486 | 0.039 | 0.479 | 0.047 | 0.697 | 0.043 | 1.000  | 0.157 |
| 1384455_at   | AA817831 | --- | --- | 0.620 | 0.039 | 1.277 | 0.055 | 0.792 | 0.247 | 1.365  | 0.037 |
| 1391532_at   | AI535169 | --- | --- | 1.719 | 0.039 | 1.417 | 0.161 | 0.980 | 0.698 | 0.903  | 0.735 |
| 1396239_at   | AI502035 | --- | --- | 2.158 | 0.039 | 2.694 | 0.000 | 1.452 | 0.015 | 1.881  | 0.003 |
| 1388668_at   | BM384972 | --- | --- | 0.702 | 0.040 | 2.399 | 0.007 | 0.648 | 0.041 | 1.887  | 0.035 |
| 1382038_at   | BE113064 | --- | --- | 0.542 | 0.040 | 1.118 | 0.752 | 0.640 | 0.050 | 0.870  | 0.471 |
| 1378037_at   | BM390078 | --- | --- | 0.473 | 0.040 | 0.757 | 0.743 | 1.060 | 0.093 | 0.550  | 0.101 |
| 1388895_at   | AI175791 | --- | --- | 1.608 | 0.040 | 3.248 | 0.004 | 1.282 | 0.152 | 2.635  | 0.004 |
| 1386507_at   | AA799858 | --- | --- | 0.355 | 0.041 | 0.944 | 0.634 | 0.315 | 0.047 | 0.710  | 0.123 |
| 1389217_at   | AI599568 | --- | --- | 0.389 | 0.041 | 0.777 | 0.198 | 0.426 | 0.000 | 0.506  | 0.002 |
| 1392756_at   | AI237628 | --- | --- | 0.519 | 0.041 | 0.841 | 0.812 | 0.938 | 0.144 | 1.135  | 0.582 |
| 1391202_at   | AW252232 | --- | --- | 0.541 | 0.043 | 0.213 | 0.007 | 0.603 | 0.062 | 0.385  | 0.060 |
| 1383988_at   | AI028887 | --- | --- | 0.694 | 0.043 | 0.331 | 0.021 | 0.665 | 0.079 | 0.581  | 0.384 |
| 1383066_at   | BG379237 | --- | --- | 0.504 | 0.043 | 0.334 | 0.037 | 0.380 | 0.029 | 0.341  | 0.012 |
| 1395966_at   | BI282914 | --- | --- | 0.372 | 0.043 | 0.988 | 0.033 | 0.304 | 0.038 | 1.016  | 0.962 |
| 1383531_at   | AA901061 | --- | --- | 1.855 | 0.044 | 4.364 | 0.006 | 1.621 | 0.048 | 4.531  | 0.026 |
| 1398408_at   | AI948410 | --- | --- | 4.256 | 0.044 | 3.586 | 0.036 | 9.915 | 0.011 | 19.371 | 0.007 |
| 1373770_at   | AI105345 | --- | --- | 0.501 | 0.044 | 1.218 | 0.004 | 0.488 | 0.028 | 1.195  | 0.025 |
| 1372167_at   | AW525656 | --- | --- | 0.800 | 0.044 | 1.784 | 0.000 | 0.596 | 0.013 | 1.211  | 0.047 |
| 1373557_at   | AI145081 | --- | --- | 0.659 | 0.045 | 1.177 | 0.199 | 0.613 | 0.048 | 0.997  | 0.916 |
| 1377733_at   | AA944531 | --- | --- | 0.491 | 0.045 | 0.824 | 0.749 | 0.366 | 0.005 | 0.640  | 0.004 |
| 1391205_at   | AA818139 | --- | --- | 0.503 | 0.045 | 1.195 | 0.139 | 0.531 | 0.027 | 1.171  | 0.256 |
| 1372664_at   | BM384229 | --- | --- | 2.037 | 0.046 | 1.579 | 0.076 | 2.269 | 0.026 | 1.094  | 0.213 |
| 1392829_at   | BI289495 | --- | --- | 0.862 | 0.046 | 1.658 | 0.679 | 0.857 | 0.264 | 1.168  | 0.877 |
| 1391211_at   | AI144936 | --- | --- | 2.536 | 0.046 | 0.633 | 0.146 | 6.757 | 0.021 | 0.948  | 0.800 |
| 1392277_at   | BI303053 | --- | --- | 1.767 | 0.046 | 4.100 | 0.022 | 1.499 | 0.009 | 5.045  | 0.032 |
| 1390389_at   | BM385936 | --- | --- | 0.663 | 0.046 | 0.431 | 0.022 | 0.634 | 0.048 | 0.474  | 0.023 |
| 1383295_at   | AA901194 | --- | --- | 1.731 | 0.046 | 2.401 | 0.023 | 2.322 | 0.002 | 2.252  | 0.014 |
| 1390369_at   | BI293026 | --- | --- | 0.789 | 0.046 | 0.949 | 0.834 | 0.822 | 0.036 | 0.964  | 0.976 |
| 1374030_at   | BE100868 | --- | --- | 0.556 | 0.046 | 0.281 | 0.000 | 0.637 | 0.198 | 0.402  | 0.012 |
| 1373576_at   | BE107337 | --- | --- | 0.558 | 0.046 | 0.271 | 0.005 | 0.637 | 0.019 | 0.643  | 0.009 |
| 1378925_at   | AW529408 | --- | --- | 0.346 | 0.047 | 0.679 | 0.337 | 0.557 | 0.005 | 0.788  | 0.091 |
| 1398624_x_at | AA957044 | --- | --- | 0.883 | 0.047 | 0.429 | 0.040 | 0.944 | 0.739 | 0.578  | 0.061 |
| 1388490_at   | AI104451 | --- | --- | 0.698 | 0.047 | 0.990 | 0.650 | 0.793 | 0.023 | 0.832  | 0.238 |
| 1373559_at   | AI228623 | --- | --- | 5.969 | 0.047 | 0.771 | 0.801 | 1.007 | 0.979 | 0.968  | 0.790 |
| 1377668_at   | BI276788 | --- | --- | 1.310 | 0.048 | 3.148 | 0.000 | 1.349 | 0.239 | 2.817  | 0.001 |
| 1377297_at   | BE118384 | --- | --- | 1.184 | 0.048 | 0.992 | 0.579 | 1.023 | 0.030 | 0.995  | 0.641 |
| 1392650_at   | AI059349 | --- | --- | 1.106 | 0.048 | 2.118 | 0.018 | 1.641 | 0.024 | 0.915  | 0.867 |
| 1390711_at   | AW535406 | --- | --- | 2.407 | 0.048 | 0.738 | 0.167 | 1.066 | 0.822 | 0.575  | 0.227 |
| 1392289_at   | BI276179 | --- | --- | 1.136 | 0.049 | 1.393 | 0.072 | 1.948 | 0.036 | 1.536  | 0.081 |
| 1389617_at   | BM392135 | --- | --- | 0.484 | 0.049 | 0.701 | 0.067 | 0.466 | 0.031 | 0.977  | 0.520 |
| 1388956_at   | BI285945 | --- | --- | 0.741 | 0.050 | 0.927 | 0.276 | 0.879 | 0.449 | 0.928  | 0.605 |
| 1396315_at   | BF408941 | --- | --- | 1.363 | 0.050 | 2.961 | 0.002 | 1.149 | 0.417 | 3.111  | 0.003 |
| 1391564_at   | AW526015 | --- | --- | 0.637 | 0.051 | 0.488 | 0.128 | 1.012 | 0.121 | 0.568  | 0.151 |
| 1380475_at   | BE096160 | --- | --- | 0.651 | 0.051 | 1.262 | 0.292 | 0.737 | 0.067 | 1.071  | 0.125 |
| 1383328_x_at | AI576297 | --- | --- | 0.544 | 0.051 | 0.218 | 0.006 | 0.578 | 0.037 | 0.224  | 0.005 |
| 1391418_at   | AI072641 | --- | --- | 2.371 | 0.052 | 0.489 | 0.023 | 1.043 | 0.783 | 0.671  | 0.098 |
| 1393114_at   | AI136684 | --- | --- | 2.156 | 0.052 | 1.391 | 0.034 | 2.269 | 0.005 | 1.727  | 0.029 |
| 1393349_x_at | BI288992 | --- | --- | 1.265 | 0.052 | 0.503 | 0.005 | 0.913 | 0.554 | 0.477  | 0.002 |
| 1398598_at   | BF549679 | --- | --- | 1.410 | 0.053 | 0.725 | 0.012 | 1.317 | 0.067 | 0.748  | 0.011 |

|              |          |     |     |       |       |       |       |       |       |       |       |
|--------------|----------|-----|-----|-------|-------|-------|-------|-------|-------|-------|-------|
| 1381750_at   | AW251098 | --- | --- | 1.850 | 0.053 | 1.105 | 0.614 | 3.316 | 0.037 | 1.049 | 0.053 |
| 1392473_at   | AW525353 | --- | --- | 0.357 | 0.054 | 0.187 | 0.002 | 0.416 | 0.000 | 0.234 | 0.000 |
| 1372754_at   | BG666424 | --- | --- | 0.756 | 0.054 | 0.836 | 0.132 | 0.764 | 0.332 | 0.762 | 0.134 |
| 1373109_at   | BI294813 | --- | --- | 1.342 | 0.054 | 1.251 | 0.008 | 1.173 | 0.670 | 1.245 | 0.174 |
| 1396344_at   | AI548117 | --- | --- | 0.514 | 0.055 | 0.521 | 0.003 | 0.538 | 0.033 | 0.425 | 0.004 |
| 1370194_at   | AA945699 | --- | --- | 1.376 | 0.055 | 2.160 | 0.014 | 0.878 | 0.568 | 1.659 | 0.015 |
| 1376640_at   | BF285466 | --- | --- | 0.631 | 0.055 | 0.667 | 0.021 | 0.765 | 0.018 | 0.769 | 0.034 |
| 1389185_at   | BI281183 | --- | --- | 0.440 | 0.056 | 0.429 | 0.052 | 0.317 | 0.077 | 0.244 | 0.059 |
| 1382009_at   | AA955721 | --- | --- | 2.501 | 0.056 | 1.804 | 0.005 | 3.142 | 0.040 | 1.222 | 0.428 |
| 1396323_at   | AI709444 | --- | --- | 0.748 | 0.057 | 1.473 | 0.227 | 0.821 | 0.347 | 1.770 | 0.088 |
| 1389890_at   | BI288731 | --- | --- | 1.500 | 0.057 | 3.422 | 0.006 | 1.379 | 0.134 | 1.951 | 0.032 |
| 1374637_at   | BE109510 | --- | --- | 0.524 | 0.057 | 0.664 | 0.066 | 0.740 | 0.405 | 0.680 | 0.058 |
| 1390805_at   | BM390762 | --- | --- | 0.232 | 0.057 | 0.458 | 0.007 | 0.236 | 0.024 | 0.279 | 0.025 |
| 1392880_at   | BG665051 | --- | --- | 0.476 | 0.058 | 0.262 | 0.054 | 0.511 | 0.060 | 0.319 | 0.195 |
| 1389560_at   | BF284702 | --- | --- | 0.735 | 0.058 | 0.676 | 0.092 | 0.720 | 0.092 | 0.721 | 0.067 |
| 1373298_at   | BI288011 | --- | --- | 0.570 | 0.058 | 0.549 | 0.024 | 0.704 | 0.004 | 0.641 | 0.129 |
| 1393130_at   | BI288617 | --- | --- | 1.331 | 0.058 | 1.243 | 0.183 | 1.450 | 0.088 | 1.424 | 0.066 |
| 1376416_at   | BI296287 | --- | --- | 0.630 | 0.058 | 0.723 | 0.075 | 0.741 | 0.096 | 0.713 | 0.129 |
| 1390111_at   | BI285224 | --- | --- | 0.606 | 0.059 | 1.043 | 0.535 | 0.644 | 0.027 | 1.114 | 0.124 |
| 1383915_at   | AI059630 | --- | --- | 1.698 | 0.059 | 1.044 | 0.055 | 3.235 | 0.103 | 1.140 | 0.621 |
| 1373893_at   | BI291309 | --- | --- | 0.696 | 0.060 | 0.714 | 0.007 | 0.902 | 0.545 | 0.677 | 0.037 |
| 1374751_at   | BM383668 | --- | --- | 2.000 | 0.060 | 0.997 | 0.983 | 3.318 | 0.000 | 1.617 | 0.003 |
| 1392499_at   | H32997   | --- | --- | 0.820 | 0.060 | 1.181 | 0.018 | 0.639 | 0.011 | 0.926 | 0.379 |
| 1391190_at   | BE117521 | --- | --- | 1.692 | 0.060 | 1.083 | 0.084 | 2.021 | 0.061 | 1.398 | 0.035 |
| 1378068_at   | AW529368 | --- | --- | 0.279 | 0.060 | 0.228 | 0.018 | 0.450 | 0.006 | 0.313 | 0.012 |
| 1380723_at   | AI179188 | --- | --- | 0.736 | 0.061 | 0.810 | 0.004 | 0.598 | 0.035 | 0.805 | 0.000 |
| 1383625_a_at | BF288164 | --- | --- | 0.298 | 0.061 | 1.089 | 0.954 | 0.405 | 0.131 | 1.178 | 0.628 |
| 1380708_at   | BF396522 | --- | --- | 1.396 | 0.062 | 0.964 | 0.867 | 0.996 | 0.331 | 1.103 | 0.410 |
| 1395858_at   | AI548127 | --- | --- | 3.458 | 0.062 | 1.360 | 0.298 | 4.563 | 0.050 | 1.721 | 0.542 |
| 1388762_at   | BF284125 | --- | --- | 1.995 | 0.062 | 2.759 | 0.002 | 1.426 | 0.158 | 2.352 | 0.036 |
| 1392145_at   | BI281801 | --- | --- | 1.968 | 0.063 | 2.680 | 0.005 | 1.158 | 0.760 | 2.166 | 0.015 |
| 1371855_at   | BM390254 | --- | --- | 0.705 | 0.064 | 0.802 | 0.029 | 0.742 | 0.057 | 0.923 | 0.043 |
| 1389443_at   | AI236463 | --- | --- | 0.882 | 0.064 | 0.670 | 0.000 | 0.937 | 0.722 | 0.856 | 0.172 |
| 1398946_at   | AI230278 | --- | --- | 0.430 | 0.065 | 1.379 | 0.016 | 0.469 | 0.011 | 1.313 | 0.014 |
| 1377707_at   | BF417096 | --- | --- | 0.761 | 0.066 | 0.822 | 0.177 | 1.291 | 0.487 | 0.749 | 0.004 |
| 1377755_at   | AI179403 | --- | --- | 1.445 | 0.066 | 1.896 | 0.018 | 1.346 | 0.390 | 2.222 | 0.005 |
| 1388998_at   | AW522835 | --- | --- | 0.840 | 0.066 | 1.121 | 0.124 | 0.786 | 0.062 | 0.896 | 0.808 |
| 1373779_at   | AI011878 | --- | --- | 0.610 | 0.066 | 0.399 | 0.005 | 0.713 | 0.020 | 0.496 | 0.003 |
| 1378472_at   | BE108158 | --- | --- | 0.999 | 0.067 | 0.928 | 0.693 | 1.544 | 0.597 | 0.994 | 0.993 |
| 1393110_at   | BI281552 | --- | --- | 0.842 | 0.067 | 1.081 | 0.289 | 0.987 | 0.903 | 1.144 | 0.091 |
| 1372919_at   | AA851904 | --- | --- | 1.461 | 0.067 | 1.725 | 0.062 | 1.800 | 0.015 | 1.680 | 0.079 |
| 1379602_at   | AI010055 | --- | --- | 1.047 | 0.068 | 0.997 | 0.990 | 1.309 | 0.064 | 1.000 | 0.942 |
| 1384494_at   | BI303215 | --- | --- | 0.838 | 0.069 | 1.350 | 0.017 | 0.843 | 0.073 | 1.217 | 0.251 |
| 1391671_at   | AA997871 | --- | --- | 2.505 | 0.070 | 1.372 | 0.078 | 1.862 | 0.163 | 1.166 | 0.082 |
| 1375048_at   | AA799566 | --- | --- | 0.669 | 0.070 | 1.239 | 0.034 | 1.015 | 0.082 | 1.315 | 0.046 |
| 1376346_at   | BM392156 | --- | --- | 0.817 | 0.072 | 0.956 | 0.398 | 1.003 | 0.071 | 0.962 | 0.438 |
| 1394020_at   | AI412164 | --- | --- | 1.454 | 0.072 | 0.715 | 0.465 | 0.924 | 0.585 | 0.923 | 0.730 |
| 1375995_at   | AI180370 | --- | --- | 0.718 | 0.072 | 0.695 | 0.019 | 0.601 | 0.045 | 0.803 | 0.068 |
| 1398931_at   | BI282246 | --- | --- | 0.332 | 0.073 | 0.238 | 0.004 | 0.338 | 0.029 | 0.419 | 0.026 |
| 1376760_at   | BF402128 | --- | --- | 1.848 | 0.073 | 3.677 | 0.000 | 1.882 | 0.094 | 4.052 | 0.001 |
| 1373533_at   | AI412460 | --- | --- | 0.929 | 0.073 | 0.937 | 0.568 | 0.899 | 0.044 | 0.745 | 0.042 |
| 1386242_at   | AI179722 | --- | --- | 1.395 | 0.073 | 1.645 | 0.073 | 1.368 | 0.224 | 1.451 | 0.236 |
| 1397326_at   | BE119158 | --- | --- | 1.633 | 0.074 | 0.803 | 0.513 | 0.998 | 0.237 | 0.975 | 0.605 |
| 1367480_at   | AI230248 | --- | --- | 0.689 | 0.074 | 0.963 | 0.288 | 0.693 | 0.022 | 0.936 | 0.420 |
| 1388754_at   | AI176839 | --- | --- | 1.291 | 0.075 | 5.093 | 0.002 | 1.614 | 0.021 | 3.796 | 0.009 |
| 1397477_at   | AA998512 | --- | --- | 0.755 | 0.075 | 0.943 | 0.351 | 0.599 | 0.078 | 0.846 | 0.331 |
| 1372627_at   | BI299197 | --- | --- | 0.738 | 0.075 | 1.751 | 0.000 | 0.690 | 0.009 | 1.381 | 0.004 |
| 1390115_at   | BM384667 | --- | --- | 0.491 | 0.076 | 0.531 | 0.000 | 0.703 | 0.039 | 0.581 | 0.003 |
| 1373659_at   | AI639350 | --- | --- | 0.821 | 0.076 | 0.152 | 0.013 | 0.380 | 0.019 | 0.244 | 0.032 |
| 1392919_at   | BI297513 | --- | --- | 0.825 | 0.076 | 0.998 | 0.327 | 0.783 | 0.125 | 0.856 | 0.318 |
| 1394065_at   | AI179423 | --- | --- | 0.729 | 0.076 | 0.351 | 0.001 | 0.486 | 0.060 | 0.364 | 0.008 |

|              |          |     |     |       |       |       |       |       |       |       |       |
|--------------|----------|-----|-----|-------|-------|-------|-------|-------|-------|-------|-------|
| 1390109_at   | BI303073 | --- | --- | 1.531 | 0.076 | 4.470 | 0.006 | 1.152 | 0.173 | 3.423 | 0.016 |
| 1395896_at   | AI233009 | --- | --- | 1.488 | 0.077 | 1.404 | 0.084 | 1.246 | 0.193 | 1.197 | 0.589 |
| 1382680_at   | BG673602 | --- | --- | 1.640 | 0.077 | 0.823 | 0.016 | 1.555 | 0.774 | 0.767 | 0.206 |
| 1393152_at   | AI007821 | --- | --- | 0.507 | 0.077 | 0.430 | 0.009 | 0.613 | 0.050 | 0.571 | 0.007 |
| 1395526_at   | BE111618 | --- | --- | 0.699 | 0.078 | 0.543 | 0.956 | 0.551 | 0.058 | 0.719 | 0.437 |
| 1375535_at   | AI103917 | --- | --- | 0.612 | 0.078 | 0.828 | 0.493 | 1.128 | 0.083 | 0.832 | 0.589 |
| 1373906_at   | AI104594 | --- | --- | 0.490 | 0.078 | 0.432 | 0.007 | 0.832 | 0.283 | 0.623 | 0.070 |
| 1383388_at   | BI303582 | --- | --- | 0.645 | 0.078 | 0.733 | 0.046 | 0.747 | 0.147 | 0.788 | 0.045 |
| 1392527_at   | AI137840 | --- | --- | 0.536 | 0.078 | 0.572 | 0.003 | 0.717 | 0.015 | 0.553 | 0.002 |
| 1393097_at   | AI709802 | --- | --- | 1.573 | 0.079 | 3.224 | 0.001 | 1.139 | 0.657 | 2.414 | 0.005 |
| 1384319_at   | BE098518 | --- | --- | 1.958 | 0.079 | 3.022 | 0.013 | 1.287 | 0.334 | 1.591 | 0.029 |
| 1384022_at   | BI288173 | --- | --- | 0.843 | 0.079 | 0.784 | 0.138 | 0.738 | 0.028 | 0.724 | 0.086 |
| 1390637_at   | BF406280 | --- | --- | 0.994 | 0.079 | 1.113 | 0.907 | 0.898 | 0.994 | 0.750 | 0.960 |
| 1388653_at   | AA849552 | --- | --- | 0.896 | 0.079 | 0.559 | 0.007 | 1.061 | 0.599 | 0.695 | 0.031 |
| 1382016_at   | AI716661 | --- | --- | 0.738 | 0.080 | 1.917 | 0.189 | 0.692 | 0.122 | 1.704 | 0.241 |
| 1397600_at   | AI717400 | --- | --- | 1.996 | 0.081 | 1.158 | 0.116 | 1.077 | 0.800 | 0.852 | 0.511 |
| 1375506_at   | BG376675 | --- | --- | 0.519 | 0.082 | 0.554 | 0.018 | 0.648 | 0.378 | 0.756 | 0.071 |
| 1391168_at   | BF407466 | --- | --- | 1.547 | 0.082 | 0.998 | 0.899 | 1.152 | 0.078 | 0.993 | 0.982 |
| 1395034_at   | AI408816 | --- | --- | 2.389 | 0.082 | 1.279 | 0.351 | 4.015 | 0.026 | 2.782 | 0.410 |
| 1380268_at   | AA956352 | --- | --- | 0.740 | 0.083 | 0.709 | 0.048 | 0.934 | 0.396 | 0.816 | 0.151 |
| 1392992_at   | BF395999 | --- | --- | 0.528 | 0.083 | 0.935 | 0.990 | 0.256 | 0.053 | 1.319 | 0.226 |
| 1378061_at   | AI043888 | --- | --- | 2.283 | 0.083 | 1.062 | 0.286 | 4.348 | 0.019 | 2.690 | 0.003 |
| 1394895_at   | AI548194 | --- | --- | 0.610 | 0.084 | 1.631 | 0.013 | 0.662 | 0.014 | 1.322 | 0.109 |
| 1375998_at   | BI279840 | --- | --- | 0.851 | 0.085 | 1.059 | 0.985 | 0.961 | 0.387 | 0.863 | 0.688 |
| 1394461_at   | BF409715 | --- | --- | 2.375 | 0.085 | 3.277 | 0.004 | 2.224 | 0.020 | 1.233 | 0.016 |
| 1395636_at   | AI576368 | --- | --- | 0.708 | 0.086 | 0.643 | 0.153 | 0.838 | 0.114 | 0.642 | 0.183 |
| 1390836_at   | AI031048 | --- | --- | 1.373 | 0.086 | 0.998 | 0.368 | 1.850 | 0.012 | 1.840 | 0.256 |
| 1372411_at   | BE110638 | --- | --- | 0.646 | 0.087 | 1.023 | 0.131 | 0.548 | 0.022 | 0.974 | 0.956 |
| 1379671_at   | BE095923 | --- | --- | 2.296 | 0.088 | 1.956 | 0.037 | 2.175 | 0.056 | 2.519 | 0.030 |
| 1372944_at   | BI275710 | --- | --- | 0.674 | 0.088 | 0.788 | 0.990 | 0.954 | 0.608 | 1.017 | 0.045 |
| 1394457_at   | AW530304 | --- | --- | 1.341 | 0.089 | 0.877 | 0.232 | 1.668 | 0.241 | 1.302 | 0.197 |
| 1374789_at   | BF550398 | --- | --- | 0.398 | 0.089 | 0.556 | 0.009 | 0.384 | 0.028 | 0.461 | 0.003 |
| 1378691_at   | AA893871 | --- | --- | 0.629 | 0.089 | 0.697 | 0.144 | 0.824 | 0.431 | 1.186 | 0.883 |
| 1377069_at   | BG379055 | --- | --- | 0.782 | 0.089 | 0.240 | 0.007 | 0.698 | 0.306 | 0.545 | 0.074 |
| 1388742_at   | AA945877 | --- | --- | 1.290 | 0.090 | 1.616 | 0.016 | 1.602 | 0.075 | 2.122 | 0.035 |
| 1393142_at   | BF562621 | --- | --- | 0.560 | 0.090 | 0.594 | 0.019 | 1.664 | 0.077 | 1.060 | 0.665 |
| 1383737_at   | BM383406 | --- | --- | 0.927 | 0.090 | 1.943 | 0.009 | 0.657 | 0.131 | 1.996 | 0.014 |
| 1380474_at   | AI013470 | --- | --- | 1.845 | 0.090 | 0.983 | 0.279 | 1.577 | 0.382 | 0.498 | 0.003 |
| 1389582_at   | AI407405 | --- | --- | 0.582 | 0.090 | 3.403 | 0.012 | 0.233 | 0.043 | 3.102 | 0.034 |
| 1381256_at   | BI276190 | --- | --- | 0.908 | 0.090 | 0.999 | 0.879 | 1.053 | 0.315 | 1.102 | 0.575 |
| 1389333_at   | AI407074 | --- | --- | 1.445 | 0.091 | 0.838 | 0.050 | 1.219 | 0.127 | 0.845 | 0.860 |
| 1390831_at   | BF407157 | --- | --- | 0.896 | 0.092 | 0.676 | 0.010 | 0.855 | 0.679 | 0.810 | 0.048 |
| 1382128_at   | BI289196 | --- | --- | 1.554 | 0.092 | 0.794 | 0.056 | 1.224 | 0.534 | 0.835 | 0.101 |
| 1379673_at   | AI230747 | --- | --- | 1.195 | 0.092 | 2.166 | 0.002 | 0.627 | 0.846 | 1.291 | 0.046 |
| 1381424_at   | AI535231 | --- | --- | 0.627 | 0.093 | 0.639 | 0.158 | 0.803 | 0.533 | 1.174 | 0.934 |
| 1395128_at   | AA899996 | --- | --- | 3.320 | 0.093 | 1.753 | 0.514 | 5.736 | 0.058 | 0.977 | 0.060 |
| 1373621_at   | BI285949 | --- | --- | 0.406 | 0.095 | 1.188 | 0.495 | 0.339 | 0.001 | 1.374 | 0.110 |
| 1371190_at   | BG153272 | --- | --- | 0.727 | 0.096 | 1.246 | 0.069 | 0.734 | 0.006 | 0.980 | 0.524 |
| 1397798_at   | BE120611 | --- | --- | 1.189 | 0.096 | 1.516 | 0.259 | 1.055 | 0.008 | 1.301 | 0.682 |
| 1393151_at   | BG668816 | --- | --- | 0.631 | 0.096 | 0.205 | 0.010 | 1.105 | 0.511 | 0.257 | 0.019 |
| 1384166_a_at | AW522260 | --- | --- | 1.691 | 0.097 | 0.996 | 0.897 | 1.232 | 0.072 | 0.867 | 0.393 |
| 1373758_at   | AI171855 | --- | --- | 0.625 | 0.097 | 1.353 | 0.049 | 0.859 | 0.280 | 1.361 | 0.242 |
| 1393584_at   | AI045201 | --- | --- | 0.285 | 0.097 | 0.756 | 0.030 | 0.174 | 0.045 | 0.671 | 0.036 |
| 1380780_at   | BI300306 | --- | --- | 2.386 | 0.098 | 1.181 | 0.190 | 1.352 | 0.274 | 0.733 | 0.159 |
| 1381421_at   | AA899688 | --- | --- | 0.803 | 0.098 | 0.917 | 0.024 | 0.743 | 0.112 | 0.875 | 0.357 |
| 1373895_at   | BE118440 | --- | --- | 0.315 | 0.098 | 0.724 | 0.034 | 0.418 | 0.146 | 0.632 | 0.176 |
| 1376913_at   | AA925375 | --- | --- | 0.396 | 0.098 | 0.809 | 0.078 | 0.668 | 0.065 | 0.818 | 0.122 |
| 1379853_at   | AI058985 | --- | --- | 0.889 | 0.098 | 0.703 | 0.284 | 0.628 | 0.444 | 0.720 | 0.005 |
| 1381859_at   | BE097018 | --- | --- | 2.182 | 0.101 | 2.096 | 0.189 | 1.633 | 0.100 | 1.659 | 0.033 |
| 1386660_at   | BF565021 | --- | --- | 0.363 | 0.101 | 0.239 | 0.002 | 0.579 | 0.056 | 0.269 | 0.008 |
| 1388667_at   | AI178793 | --- | --- | 0.457 | 0.101 | 0.421 | 0.003 | 0.458 | 0.008 | 0.358 | 0.003 |

|              |          |     |     |       |       |       |       |       |       |       |       |
|--------------|----------|-----|-----|-------|-------|-------|-------|-------|-------|-------|-------|
| 1395714_at   | AT005664 | --- | --- | 0.334 | 0.101 | 0.349 | 0.012 | 0.319 | 0.091 | 0.289 | 0.001 |
| 1393463_at   | BM390801 | --- | --- | 1.496 | 0.101 | 0.776 | 0.093 | 1.158 | 0.191 | 0.762 | 0.093 |
| 1391374_at   | BE106930 | --- | --- | 1.165 | 0.102 | 1.123 | 0.095 | 1.628 | 0.048 | 1.371 | 0.189 |
| 1379938_at   | BE109444 | --- | --- | 0.551 | 0.104 | 0.544 | 0.035 | 0.476 | 0.113 | 0.476 | 0.038 |
| 1383052_a_at | BE112093 | --- | --- | 1.067 | 0.104 | 2.823 | 0.052 | 1.178 | 0.595 | 1.060 | 0.880 |
| 1393481_at   | BM390812 | --- | --- | 0.721 | 0.104 | 0.567 | 0.018 | 0.540 | 0.067 | 0.485 | 0.015 |
| 1382951_at   | AA957549 | --- | --- | 3.258 | 0.104 | 3.935 | 0.021 | 1.502 | 0.070 | 2.619 | 0.008 |
| 1395766_at   | BM391518 | --- | --- | 1.804 | 0.104 | 1.195 | 0.310 | 1.597 | 0.139 | 1.140 | 0.262 |
| 1396941_at   | AA997470 | --- | --- | 0.867 | 0.105 | 1.573 | 0.081 | 6.875 | 0.048 | 2.559 | 0.020 |
| 1392452_at   | AI169548 | --- | --- | 0.608 | 0.105 | 0.704 | 0.039 | 0.586 | 0.079 | 0.752 | 0.232 |
| 1374194_at   | AI170007 | --- | --- | 0.688 | 0.105 | 0.641 | 0.017 | 0.766 | 0.007 | 0.579 | 0.006 |
| 1377976_at   | AI137539 | --- | --- | 1.065 | 0.106 | 0.745 | 0.084 | 1.472 | 0.126 | 0.806 | 0.783 |
| 1372463_at   | AI010084 | --- | --- | 1.331 | 0.106 | 0.731 | 0.040 | 1.078 | 0.116 | 0.997 | 0.185 |
| 1375912_a_at | BI285430 | --- | --- | 0.834 | 0.106 | 0.246 | 0.002 | 1.454 | 0.381 | 0.587 | 0.099 |
| 1383665_at   | BE096055 | --- | --- | 2.483 | 0.108 | 2.590 | 0.005 | 4.326 | 0.058 | 2.038 | 0.015 |
| 1397547_at   | BF407913 | --- | --- | 1.621 | 0.108 | 0.933 | 0.750 | 1.507 | 0.974 | 1.831 | 0.186 |
| 1377955_at   | AI137602 | --- | --- | 1.630 | 0.109 | 1.622 | 0.025 | 1.000 | 0.999 | 1.302 | 0.064 |
| 1399071_at   | BI281808 | --- | --- | 3.047 | 0.109 | 2.607 | 0.092 | 5.595 | 0.021 | 2.337 | 0.045 |
| 1373470_at   | BM388896 | --- | --- | 1.128 | 0.110 | 0.942 | 0.403 | 0.969 | 0.932 | 0.966 | 0.560 |
| 1371362_at   | BI285402 | --- | --- | 0.728 | 0.111 | 0.515 | 0.001 | 0.794 | 0.007 | 0.549 | 0.015 |
| 1393318_at   | BG379074 | --- | --- | 0.869 | 0.111 | 1.433 | 0.424 | 1.004 | 0.337 | 1.253 | 0.997 |
| 1381975_at   | BG371767 | --- | --- | 0.633 | 0.111 | 0.349 | 0.001 | 0.427 | 0.006 | 0.452 | 0.012 |
| 1375362_at   | BI304125 | --- | --- | 1.855 | 0.111 | 1.541 | 0.053 | 2.016 | 0.086 | 2.304 | 0.010 |
| 1394127_at   | AA943800 | --- | --- | 0.825 | 0.111 | 0.812 | 0.377 | 0.959 | 0.104 | 0.651 | 0.377 |
| 1398981_at   | AI171951 | --- | --- | 0.381 | 0.112 | 0.687 | 0.136 | 0.415 | 0.049 | 0.769 | 0.002 |
| 1397398_at   | BG376725 | --- | --- | 0.723 | 0.112 | 0.906 | 0.153 | 0.785 | 0.315 | 0.627 | 0.041 |
| 1392062_a_at | BE097702 | --- | --- | 0.816 | 0.112 | 0.376 | 0.001 | 0.492 | 0.056 | 0.444 | 0.021 |
| 1399146_at   | AI576776 | --- | --- | 0.335 | 0.113 | 0.388 | 0.000 | 0.141 | 0.001 | 0.263 | 0.035 |
| 1372098_at   | AI172092 | --- | --- | 0.901 | 0.113 | 1.510 | 0.074 | 0.768 | 0.160 | 1.215 | 0.450 |
| 1372567_at   | BI274544 | --- | --- | 0.384 | 0.113 | 0.730 | 0.913 | 0.276 | 0.025 | 0.432 | 0.048 |
| 1378916_at   | AI029234 | --- | --- | 0.586 | 0.113 | 0.419 | 0.008 | 0.568 | 0.007 | 0.442 | 0.019 |
| 1396852_at   | AW532366 | --- | --- | 2.402 | 0.114 | 0.733 | 0.157 | 1.163 | 0.331 | 0.946 | 0.752 |
| 1374501_at   | BF550209 | --- | --- | 1.634 | 0.114 | 1.082 | 0.867 | 1.610 | 0.001 | 0.942 | 0.138 |
| 1376998_a_at | BI276006 | --- | --- | 1.983 | 0.114 | 0.869 | 0.962 | 2.446 | 0.011 | 0.564 | 0.113 |
| 1398669_at   | AA893160 | --- | --- | 0.758 | 0.115 | 2.547 | 0.002 | 0.922 | 0.608 | 1.539 | 0.002 |
| 1371046_at   | AW920849 | --- | --- | 1.158 | 0.115 | 1.315 | 0.121 | 0.945 | 0.975 | 1.207 | 0.970 |
| 1371648_at   | BF284000 | --- | --- | 0.322 | 0.116 | 0.500 | 0.000 | 0.588 | 0.002 | 0.732 | 0.177 |
| 1383327_at   | AI576297 | --- | --- | 0.497 | 0.116 | 0.293 | 0.005 | 0.619 | 0.032 | 0.263 | 0.009 |
| 1390163_at   | BF282174 | --- | --- | 0.557 | 0.117 | 0.334 | 0.001 | 0.555 | 0.084 | 0.360 | 0.008 |
| 1376591_a_at | AA800172 | --- | --- | 0.773 | 0.117 | 0.780 | 0.007 | 0.700 | 0.054 | 0.867 | 0.092 |
| 1379438_at   | AA944576 | --- | --- | 0.973 | 0.118 | 0.426 | 0.001 | 1.015 | 0.122 | 0.878 | 0.062 |
| 1397220_at   | AW534601 | --- | --- | 0.632 | 0.119 | 0.945 | 0.663 | 0.633 | 0.085 | 0.858 | 0.043 |
| 1370217_at   | L26525   | --- | --- | 0.473 | 0.119 | 0.872 | 0.039 | 0.466 | 0.003 | 0.706 | 0.116 |
| 1373384_at   | BM391893 | --- | --- | 0.608 | 0.119 | 0.256 | 0.021 | 0.603 | 0.103 | 0.640 | 0.010 |
| 1382748_at   | AI145481 | --- | --- | 0.612 | 0.121 | 0.678 | 0.015 | 0.468 | 0.072 | 0.655 | 0.021 |
| 1398403_at   | BG381546 | --- | --- | 0.954 | 0.121 | 0.627 | 0.024 | 2.107 | 0.065 | 0.719 | 0.026 |
| 1390126_at   | BE112913 | --- | --- | 0.838 | 0.121 | 0.820 | 0.159 | 0.901 | 0.170 | 0.815 | 0.236 |
| 1373566_at   | AI103026 | --- | --- | 1.362 | 0.122 | 3.574 | 0.002 | 0.474 | 0.052 | 2.117 | 0.011 |
| 1373182_at   | BF281899 | --- | --- | 0.584 | 0.122 | 1.347 | 0.001 | 0.711 | 0.056 | 1.181 | 0.002 |
| 1397867_at   | BG379733 | --- | --- | 2.057 | 0.122 | 0.996 | 0.950 | 1.110 | 0.606 | 0.998 | 0.971 |
| 1393045_at   | BF556405 | --- | --- | 1.236 | 0.123 | 1.377 | 0.134 | 0.641 | 0.261 | 1.163 | 0.247 |
| 1379094_at   | BF386909 | --- | --- | 1.248 | 0.123 | 2.042 | 0.985 | 3.127 | 0.038 | 1.251 | 0.786 |
| 1378347_at   | AW252020 | --- | --- | 1.661 | 0.124 | 1.887 | 0.115 | 0.981 | 0.663 | 1.583 | 0.510 |
| 1374407_at   | AI227970 | --- | --- | 1.417 | 0.125 | 0.986 | 0.539 | 6.545 | 0.047 | 1.012 | 0.950 |
| 1396442_at   | BE111933 | --- | --- | 1.457 | 0.126 | 0.833 | 0.055 | 2.108 | 0.074 | 0.810 | 0.080 |
| 1388774_at   | BM389032 | --- | --- | 0.903 | 0.126 | 1.671 | 0.014 | 0.860 | 0.885 | 1.678 | 0.025 |
| 1390406_at   | AI232065 | --- | --- | 0.552 | 0.126 | 0.908 | 0.706 | 0.352 | 0.073 | 0.784 | 0.021 |
| 1382487_at   | AI500925 | --- | --- | 1.040 | 0.127 | 1.260 | 0.082 | 3.429 | 0.005 | 1.344 | 0.059 |
| 1377000_at   | BI297041 | --- | --- | 1.844 | 0.127 | 3.259 | 0.006 | 2.357 | 0.010 | 2.462 | 0.021 |
| 1383619_at   | BE105983 | --- | --- | 2.024 | 0.127 | 3.418 | 0.001 | 1.603 | 0.002 | 3.540 | 0.005 |
| 1381793_at   | BE098864 | --- | --- | 1.268 | 0.129 | 0.852 | 0.321 | 0.862 | 0.098 | 0.844 | 0.960 |

|              |          |     |     |       |       |       |       |       |       |       |       |
|--------------|----------|-----|-----|-------|-------|-------|-------|-------|-------|-------|-------|
| 1383040_a_at | AI044098 | --- | --- | 0.588 | 0.129 | 0.804 | 0.207 | 0.561 | 0.108 | 0.539 | 0.100 |
| 1373035_at   | AI031032 | --- | --- | 0.551 | 0.129 | 1.017 | 0.907 | 0.381 | 0.009 | 0.892 | 0.294 |
| 1373341_at   | AI231183 | --- | --- | 1.538 | 0.129 | 1.795 | 0.027 | 1.664 | 0.344 | 1.497 | 0.003 |
| 1393166_at   | AA998749 | --- | --- | 0.737 | 0.129 | 2.801 | 0.004 | 0.654 | 0.019 | 2.150 | 0.001 |
| 1375863_a_at | AI411621 | --- | --- | 0.886 | 0.129 | 0.561 | 0.011 | 0.597 | 0.206 | 0.564 | 0.080 |
| 1384040_at   | BE121108 | --- | --- | 1.199 | 0.130 | 0.975 | 0.861 | 1.042 | 0.920 | 0.738 | 0.215 |
| 1376077_at   | BG374774 | --- | --- | 2.928 | 0.130 | 2.496 | 0.028 | 3.109 | 0.097 | 1.468 | 0.049 |
| 1392830_at   | BF396625 | --- | --- | 2.027 | 0.131 | 2.008 | 0.053 | 1.701 | 0.070 | 1.691 | 0.136 |
| 1373695_at   | AI176675 | --- | --- | 0.596 | 0.132 | 0.436 | 0.000 | 0.496 | 0.094 | 0.426 | 0.018 |
| 1391414_at   | AI409142 | --- | --- | 0.759 | 0.133 | 0.901 | 0.091 | 0.893 | 0.367 | 1.061 | 0.696 |
| 1395856_at   | BF289112 | --- | --- | 0.334 | 0.134 | 0.219 | 0.034 | 0.751 | 0.460 | 0.516 | 0.134 |
| 1372360_at   | AA817862 | --- | --- | 1.609 | 0.135 | 1.043 | 0.176 | 1.390 | 0.060 | 1.146 | 0.400 |
| 1384649_at   | AI170778 | --- | --- | 1.297 | 0.136 | 0.632 | 0.109 | 1.687 | 0.054 | 0.475 | 0.200 |
| 1394019_at   | BI283971 | --- | --- | 1.513 | 0.137 | 1.230 | 0.108 | 1.778 | 0.063 | 1.325 | 0.013 |
| 1396403_at   | BE107859 | --- | --- | 0.750 | 0.137 | 1.482 | 0.016 | 0.882 | 0.577 | 0.993 | 0.939 |
| 1376960_at   | AA892240 | --- | --- | 0.892 | 0.138 | 1.034 | 0.785 | 1.031 | 0.928 | 1.047 | 0.695 |
| 1371345_at   | AI008699 | --- | --- | 0.723 | 0.139 | 1.078 | 0.416 | 0.820 | 0.243 | 1.091 | 0.763 |
| 1373834_at   | AI233983 | --- | --- | 0.679 | 0.141 | 0.998 | 0.517 | 0.614 | 0.117 | 1.000 | 0.997 |
| 1371438_at   | BE113144 | --- | --- | 0.778 | 0.141 | 0.724 | 0.086 | 0.717 | 0.066 | 0.635 | 0.019 |
| 1374749_at   | BM392169 | --- | --- | 1.659 | 0.142 | 0.630 | 0.038 | 0.833 | 0.256 | 0.674 | 0.046 |
| 1372450_at   | AW916609 | --- | --- | 0.910 | 0.143 | 1.283 | 0.043 | 0.769 | 0.017 | 0.931 | 0.153 |
| 1383386_a_at | AI177465 | --- | --- | 0.677 | 0.143 | 0.788 | 0.223 | 1.119 | 0.159 | 0.890 | 0.080 |
| 1380203_at   | BI285498 | --- | --- | 0.751 | 0.144 | 0.453 | 0.018 | 0.533 | 0.120 | 0.603 | 0.227 |
| 1392188_at   | AI713162 | --- | --- | 1.877 | 0.144 | 1.340 | 0.076 | 1.678 | 0.999 | 1.632 | 0.071 |
| 1391578_at   | BF397936 | --- | --- | 1.241 | 0.145 | 1.737 | 0.028 | 1.141 | 0.519 | 1.637 | 0.675 |
| 1372534_at   | AW434092 | --- | --- | 0.720 | 0.145 | 1.359 | 0.123 | 0.598 | 0.032 | 1.268 | 0.024 |
| 1397918_at   | BF411420 | --- | --- | 0.589 | 0.145 | 1.149 | 0.099 | 0.569 | 0.000 | 0.999 | 0.991 |
| 1386668_a_at | BF565188 | --- | --- | 0.693 | 0.145 | 1.725 | 0.132 | 0.736 | 0.043 | 1.328 | 0.025 |
| 1378221_at   | BE117032 | --- | --- | 1.045 | 0.146 | 1.386 | 0.809 | 0.977 | 0.781 | 1.143 | 0.509 |
| 1397030_at   | AI406451 | --- | --- | 1.519 | 0.146 | 1.786 | 0.002 | 1.677 | 0.031 | 1.346 | 0.194 |
| 1382515_at   | AI059408 | --- | --- | 0.771 | 0.147 | 1.654 | 0.001 | 1.012 | 0.889 | 1.041 | 0.646 |
| 1381989_at   | BI280114 | --- | --- | 0.703 | 0.148 | 0.854 | 0.500 | 0.604 | 0.343 | 0.586 | 0.053 |
| 1374905_at   | AA925303 | --- | --- | 1.052 | 0.150 | 1.006 | 0.805 | 0.664 | 0.792 | 1.006 | 0.494 |
| 1386817_at   | H32518   | --- | --- | 0.556 | 0.151 | 1.001 | 0.993 | 0.650 | 0.158 | 0.744 | 0.999 |
| 1390320_at   | BF415486 | --- | --- | 1.672 | 0.151 | 1.006 | 0.933 | 1.381 | 0.533 | 0.870 | 0.175 |
| 1389084_at   | AI177159 | --- | --- | 0.535 | 0.152 | 0.352 | 0.023 | 0.835 | 0.402 | 0.581 | 0.078 |
| 1383094_at   | BI304048 | --- | --- | 1.407 | 0.153 | 0.808 | 0.118 | 2.092 | 0.012 | 1.515 | 0.020 |
| 1384215_at   | AI144991 | --- | --- | 0.286 | 0.154 | 0.183 | 0.005 | 0.634 | 0.369 | 0.593 | 0.015 |
| 1390458_at   | BG666849 | --- | --- | 0.840 | 0.154 | 0.793 | 0.737 | 0.855 | 0.549 | 0.788 | 0.442 |
| 1371398_at   | BF281400 | --- | --- | 0.731 | 0.154 | 0.652 | 0.012 | 0.622 | 0.023 | 0.648 | 0.077 |
| 1373630_at   | BG378832 | --- | --- | 0.784 | 0.154 | 0.299 | 0.047 | 0.759 | 0.428 | 0.519 | 0.017 |
| 1373027_at   | AA944375 | --- | --- | 1.407 | 0.154 | 1.753 | 0.006 | 1.740 | 0.055 | 1.638 | 0.009 |
| 1391009_a_at | AA851338 | --- | --- | 1.516 | 0.154 | 2.025 | 0.080 | 1.530 | 0.011 | 1.036 | 0.741 |
| 1377105_at   | BM385715 | --- | --- | 1.412 | 0.155 | 2.595 | 0.001 | 1.133 | 0.250 | 1.398 | 0.002 |
| 1378949_at   | BF412698 | --- | --- | 0.464 | 0.155 | 0.433 | 0.042 | 0.600 | 0.160 | 0.497 | 0.002 |
| 1383074_at   | H32368   | --- | --- | 0.507 | 0.157 | 1.296 | 0.990 | 0.426 | 0.112 | 1.168 | 0.816 |
| 1383599_at   | BE101133 | --- | --- | 0.832 | 0.158 | 0.934 | 0.128 | 0.786 | 0.009 | 0.843 | 0.110 |
| 1378322_at   | BM385592 | --- | --- | 0.757 | 0.158 | 0.680 | 0.020 | 0.669 | 0.060 | 0.635 | 0.074 |
| 1373536_at   | AW525196 | --- | --- | 1.774 | 0.158 | 2.125 | 0.118 | 1.283 | 0.289 | 1.255 | 0.409 |
| 1374519_at   | AI231782 | --- | --- | 0.815 | 0.159 | 0.263 | 0.011 | 5.835 | 0.013 | 0.902 | 0.419 |
| 1376582_at   | BE108373 | --- | --- | 1.857 | 0.159 | 1.223 | 0.144 | 2.031 | 0.293 | 1.133 | 0.047 |
| 1399164_a_at | BE112193 | --- | --- | 0.439 | 0.160 | 0.634 | 0.052 | 0.312 | 0.003 | 0.504 | 0.155 |
| 1384475_at   | AW918576 | --- | --- | 2.369 | 0.162 | 1.067 | 0.734 | 5.350 | 0.055 | 0.435 | 0.448 |
| 1370953_at   | BE113639 | --- | --- | 0.628 | 0.163 | 1.848 | 0.007 | 0.479 | 0.026 | 1.664 | 0.024 |
| 1379975_at   | AW529144 | --- | --- | 1.107 | 0.163 | 1.000 | 0.992 | 1.067 | 0.512 | 0.995 | 0.976 |
| 1389278_at   | BI282934 | --- | --- | 0.603 | 0.165 | 0.913 | 0.144 | 0.603 | 0.168 | 0.792 | 0.401 |
| 1376630_at   | AI599509 | --- | --- | 0.547 | 0.166 | 0.701 | 0.042 | 0.615 | 0.139 | 0.724 | 0.025 |
| 1372637_at   | AI169241 | --- | --- | 0.795 | 0.167 | 0.880 | 0.953 | 0.817 | 0.168 | 1.041 | 0.491 |
| 1379325_at   | BI274837 | --- | --- | 1.458 | 0.167 | 2.530 | 0.001 | 1.015 | 0.730 | 2.499 | 0.002 |
| 1384709_at   | AA800711 | --- | --- | 0.762 | 0.167 | 0.829 | 0.355 | 0.554 | 0.128 | 0.798 | 0.047 |
| 1392161_at   | AI030731 | --- | --- | 1.027 | 0.167 | 2.386 | 0.007 | 0.645 | 0.385 | 1.787 | 0.121 |



|              |           |     |     |       |       |       |       |       |       |       |       |
|--------------|-----------|-----|-----|-------|-------|-------|-------|-------|-------|-------|-------|
| 1383403_at   | AW523626  | --- | --- | 0.597 | 0.168 | 0.379 | 0.005 | 0.781 | 0.466 | 0.419 | 0.036 |
| 1371484_at   | BM390252  | --- | --- | 0.897 | 0.168 | 1.468 | 0.112 | 0.928 | 0.066 | 1.429 | 0.519 |
| 1375246_at   | BG371965  | --- | --- | 1.080 | 0.169 | 1.217 | 0.191 | 0.871 | 0.194 | 1.246 | 0.014 |
| 1374611_at   | AW535065  | --- | --- | 1.364 | 0.170 | 0.484 | 0.007 | 1.261 | 0.270 | 0.608 | 0.007 |
| 1383502_at   | BE113753  | --- | --- | 0.743 | 0.170 | 1.148 | 0.232 | 1.292 | 0.339 | 1.761 | 0.559 |
| 1371792_at   | AI102045  | --- | --- | 1.070 | 0.170 | 1.039 | 0.886 | 1.018 | 0.719 | 0.905 | 0.298 |
| 1398906_at   | BM391354  | --- | --- | 0.372 | 0.170 | 0.401 | 0.015 | 0.390 | 0.075 | 0.558 | 0.000 |
| 1383093_at   | AI029437  | --- | --- | 1.133 | 0.170 | 1.149 | 0.183 | 1.085 | 0.143 | 1.115 | 0.208 |
| 1390108_at   | AI233162  | --- | --- | 0.490 | 0.170 | 0.460 | 0.048 | 0.395 | 0.003 | 0.357 | 0.035 |
| 1398603_at   | AA957514  | --- | --- | 0.793 | 0.170 | 1.083 | 0.478 | 0.700 | 0.733 | 1.135 | 0.468 |
| 1373301_at   | BE113133  | --- | --- | 0.927 | 0.171 | 1.073 | 0.068 | 0.629 | 0.021 | 0.807 | 0.581 |
| 1394563_at   | AI230657  | --- | --- | 0.420 | 0.171 | 0.244 | 0.000 | 0.414 | 0.092 | 0.170 | 0.025 |
| 1372060_at   | AI010668  | --- | --- | 1.408 | 0.172 | 0.413 | 0.007 | 2.100 | 0.128 | 0.841 | 0.161 |
| 1367521_at   | BI281185  | --- | --- | 0.758 | 0.173 | 2.326 | 0.011 | 0.661 | 0.670 | 1.342 | 0.026 |
| 1382658_at   | AI070638  | --- | --- | 0.710 | 0.173 | 1.288 | 0.727 | 1.268 | 0.438 | 0.826 | 0.505 |
| 1371523_at   | AI104261  | --- | --- | 0.792 | 0.173 | 0.817 | 0.438 | 0.684 | 0.061 | 1.019 | 0.915 |
| 1389042_at   | AI030916  | --- | --- | 1.119 | 0.174 | 0.901 | 0.975 | 0.844 | 0.475 | 0.790 | 0.520 |
| 1384188_at   | AW142766  | --- | --- | 1.640 | 0.174 | 0.253 | 0.007 | 2.547 | 0.007 | 0.487 | 0.001 |
| 1371728_at   | BF281133  | --- | --- | 0.864 | 0.177 | 0.746 | 0.905 | 0.820 | 0.110 | 0.853 | 0.623 |
| 1382707_at   | BM386762  | --- | --- | 2.275 | 0.177 | 1.964 | 0.021 | 1.235 | 0.062 | 1.861 | 0.025 |
| 1379432_at   | AW918404  | --- | --- | 0.891 | 0.177 | 1.185 | 0.336 | 1.120 | 0.325 | 1.126 | 0.303 |
| 1367479_at   | AI599994  | --- | --- | 0.834 | 0.177 | 1.070 | 0.873 | 0.785 | 0.152 | 0.962 | 0.850 |
| 1387784_at   | NM_053925 | --- | --- | 2.080 | 0.179 | 2.780 | 0.000 | 1.804 | 0.015 | 2.647 | 0.008 |
| 1383081_at   | BM388245  | --- | --- | 0.582 | 0.181 | 0.445 | 0.000 | 0.675 | 0.009 | 0.538 | 0.001 |
| 1395211_s_at | BE118557  | --- | --- | 1.318 | 0.181 | 0.509 | 0.036 | 2.099 | 0.173 | 0.411 | 0.055 |
| 1381996_at   | BG666712  | --- | --- | 1.135 | 0.181 | 0.470 | 0.001 | 1.188 | 0.248 | 0.641 | 0.027 |
| 1371651_at   | BI295882  | --- | --- | 0.574 | 0.182 | 0.422 | 0.004 | 0.639 | 0.003 | 0.522 | 0.006 |
| 1390263_at   | AI179936  | --- | --- | 0.643 | 0.182 | 0.234 | 0.002 | 0.303 | 0.019 | 0.154 | 0.006 |
| 1384043_at   | BG667918  | --- | --- | 0.767 | 0.182 | 0.619 | 0.005 | 0.736 | 0.060 | 0.520 | 0.003 |
| 1393685_at   | BF404962  | --- | --- | 1.091 | 0.183 | 0.809 | 0.075 | 1.183 | 0.873 | 0.727 | 0.113 |
| 1374909_at   | BI296626  | --- | --- | 0.861 | 0.184 | 1.369 | 0.154 | 1.522 | 0.950 | 0.972 | 0.725 |
| 1385265_a_at | AW528215  | --- | --- | 0.919 | 0.184 | 0.991 | 0.510 | 1.131 | 0.971 | 1.325 | 0.011 |
| 1383728_at   | BM387529  | --- | --- | 1.768 | 0.184 | 3.765 | 0.005 | 1.482 | 0.226 | 4.072 | 0.018 |
| 1385231_at   | AI044528  | --- | --- | 1.461 | 0.185 | 1.411 | 0.174 | 2.186 | 0.026 | 1.691 | 0.133 |
| 1380294_at   | AA859714  | --- | --- | 0.531 | 0.185 | 1.666 | 0.363 | 1.089 | 0.159 | 1.722 | 0.208 |
| 1373551_at   | AA817753  | --- | --- | 1.572 | 0.185 | 0.725 | 0.112 | 1.818 | 0.004 | 0.637 | 0.048 |
| 1373250_at   | AI229404  | --- | --- | 1.822 | 0.187 | 1.174 | 0.913 | 2.580 | 0.021 | 1.044 | 0.473 |
| 1392460_at   | BF283685  | --- | --- | 0.826 | 0.187 | 0.866 | 0.263 | 0.758 | 0.158 | 0.869 | 0.970 |
| 1375223_at   | BI294737  | --- | --- | 0.824 | 0.187 | 0.446 | 0.012 | 1.068 | 0.210 | 0.714 | 0.038 |
| 1372334_at   | AW144821  | --- | --- | 0.868 | 0.189 | 0.524 | 0.009 | 0.719 | 0.005 | 0.678 | 0.038 |
| 1377157_at   | BI273815  | --- | --- | 1.322 | 0.189 | 0.491 | 0.002 | 1.050 | 0.968 | 0.489 | 0.012 |
| 1395510_at   | AW916573  | --- | --- | 0.826 | 0.190 | 0.998 | 0.710 | 1.188 | 0.890 | 1.002 | 0.882 |
| 1397492_at   | BF410962  | --- | --- | 0.785 | 0.191 | 0.989 | 0.931 | 0.659 | 0.169 | 1.023 | 0.936 |
| 1371934_at   | AI406487  | --- | --- | 0.787 | 0.192 | 0.994 | 0.962 | 1.192 | 0.927 | 0.999 | 0.991 |
| 1389902_at   | BI285090  | --- | --- | 0.875 | 0.193 | 0.956 | 0.252 | 0.992 | 0.444 | 0.962 | 0.438 |
| 1379210_at   | AI500867  | --- | --- | 0.999 | 0.193 | 0.543 | 0.030 | 0.522 | 0.057 | 0.565 | 0.036 |
| 1374924_at   | BE098025  | --- | --- | 0.491 | 0.193 | 0.420 | 0.101 | 0.651 | 0.487 | 0.419 | 0.102 |
| 1382779_at   | BF285833  | --- | --- | 0.680 | 0.195 | 0.828 | 0.200 | 0.557 | 0.047 | 1.015 | 0.345 |
| 1372721_at   | AI175447  | --- | --- | 0.761 | 0.195 | 1.100 | 0.245 | 1.211 | 0.022 | 1.357 | 0.063 |
| 1388338_at   | BI278637  | --- | --- | 0.722 | 0.195 | 0.799 | 0.181 | 0.725 | 0.002 | 0.764 | 0.726 |
| 1385076_at   | BE120749  | --- | --- | 0.952 | 0.195 | 1.019 | 0.921 | 0.971 | 0.950 | 1.032 | 0.661 |
| 1377949_s_at | AA899043  | --- | --- | 1.334 | 0.199 | 1.596 | 0.214 | 1.447 | 0.114 | 1.397 | 0.147 |
| 1379601_at   | AI030982  | --- | --- | 0.827 | 0.202 | 1.629 | 0.189 | 1.134 | 0.272 | 1.079 | 0.661 |
| 1373540_at   | AA848306  | --- | --- | 1.263 | 0.202 | 0.990 | 0.720 | 1.346 | 0.108 | 1.031 | 0.431 |
| 1397267_at   | BF410275  | --- | --- | 0.722 | 0.202 | 0.287 | 0.001 | 0.785 | 0.202 | 0.272 | 0.012 |
| 1393058_at   | BE101947  | --- | --- | 0.548 | 0.203 | 0.667 | 0.200 | 0.353 | 0.019 | 0.655 | 0.112 |
| 1371653_at   | BI281955  | --- | --- | 1.402 | 0.203 | 2.318 | 0.000 | 1.146 | 0.028 | 1.670 | 0.025 |
| 1382457_at   | AI029816  | --- | --- | 0.923 | 0.206 | 0.846 | 0.332 | 1.500 | 0.036 | 0.915 | 0.573 |
| 1394857_at   | AI535136  | --- | --- | 0.800 | 0.207 | 1.005 | 0.793 | 0.936 | 0.301 | 0.861 | 0.155 |
| 1398977_at   | BF558116  | --- | --- | 0.707 | 0.207 | 1.195 | 0.156 | 0.589 | 0.201 | 1.506 | 0.039 |
| 1376363_at   | AI233337  | --- | --- | 0.477 | 0.207 | 0.410 | 0.073 | 0.481 | 0.132 | 0.379 | 0.011 |

|              |          |     |     |       |       |       |       |       |       |       |       |
|--------------|----------|-----|-----|-------|-------|-------|-------|-------|-------|-------|-------|
| 1385346_at   | BE103347 | --- | --- | 1.767 | 0.208 | 1.625 | 0.021 | 1.646 | 0.929 | 1.557 | 0.066 |
| 1390623_at   | BI279799 | --- | --- | 0.870 | 0.209 | 3.115 | 0.014 | 0.871 | 0.173 | 2.189 | 0.003 |
| 1385639_at   | AI058950 | --- | --- | 1.058 | 0.209 | 1.243 | 0.072 | 1.123 | 0.273 | 1.323 | 0.033 |
| 1375579_at   | BG377374 | --- | --- | 0.786 | 0.210 | 1.412 | 0.012 | 0.783 | 0.196 | 1.251 | 0.165 |
| 1372319_at   | BF282811 | --- | --- | 1.087 | 0.210 | 0.700 | 0.042 | 0.716 | 0.014 | 0.530 | 0.041 |
| 1380763_at   | AI101194 | --- | --- | 1.504 | 0.211 | 0.571 | 0.137 | 1.633 | 0.075 | 0.903 | 0.256 |
| 1392530_at   | AI409545 | --- | --- | 0.524 | 0.212 | 0.562 | 0.094 | 0.404 | 0.039 | 0.868 | 0.009 |
| 1398486_at   | BF400868 | --- | --- | 0.572 | 0.213 | 0.495 | 0.007 | 0.501 | 0.137 | 0.404 | 0.018 |
| 1390266_at   | BF397998 | --- | --- | 0.791 | 0.213 | 0.954 | 0.464 | 0.748 | 0.132 | 0.820 | 0.137 |
| 1399014_at   | AA894099 | --- | --- | 1.529 | 0.213 | 1.235 | 0.077 | 1.142 | 0.322 | 1.150 | 0.122 |
| 1388421_at   | BI295895 | --- | --- | 0.791 | 0.214 | 1.676 | 0.218 | 1.182 | 0.871 | 1.173 | 0.778 |
| 1380404_at   | H31722   | --- | --- | 0.667 | 0.214 | 0.956 | 0.724 | 0.956 | 0.883 | 0.998 | 0.994 |
| 1375179_at   | AI231282 | --- | --- | 0.787 | 0.214 | 2.548 | 0.010 | 0.965 | 0.532 | 1.858 | 0.040 |
| 1373241_at   | AW252569 | --- | --- | 0.528 | 0.214 | 0.449 | 0.004 | 0.409 | 0.026 | 0.529 | 0.012 |
| 1391607_at   | BE109653 | --- | --- | 1.281 | 0.215 | 1.658 | 0.005 | 1.174 | 0.392 | 1.566 | 0.011 |
| 1382840_at   | AI232423 | --- | --- | 1.343 | 0.215 | 0.950 | 0.115 | 0.975 | 0.948 | 0.900 | 0.067 |
| 1374049_at   | AI230220 | --- | --- | 0.580 | 0.216 | 0.852 | 0.139 | 0.508 | 0.201 | 0.937 | 0.508 |
| 1385487_at   | AW530957 | --- | --- | 1.128 | 0.216 | 2.431 | 0.004 | 1.040 | 0.591 | 2.415 | 0.001 |
| 1391583_at   | BI280377 | --- | --- | 0.811 | 0.218 | 0.991 | 0.997 | 0.820 | 0.168 | 1.160 | 0.223 |
| 1384394_at   | BF548081 | --- | --- | 0.833 | 0.218 | 0.749 | 0.193 | 0.526 | 0.008 | 0.646 | 0.084 |
| 1394721_at   | BF412697 | --- | --- | 1.095 | 0.218 | 1.400 | 0.162 | 1.108 | 0.124 | 1.415 | 0.051 |
| 1376868_at   | BM389293 | --- | --- | 0.537 | 0.218 | 0.806 | 0.014 | 0.209 | 0.053 | 0.551 | 0.001 |
| 1375790_at   | BI300458 | --- | --- | 0.756 | 0.219 | 0.560 | 0.049 | 2.127 | 0.019 | 0.501 | 0.195 |
| 1372472_at   | AA859614 | --- | --- | 0.440 | 0.219 | 0.429 | 0.003 | 0.437 | 0.013 | 0.440 | 0.009 |
| 1390576_at   | BE116370 | --- | --- | 1.261 | 0.219 | 1.527 | 0.004 | 0.737 | 0.221 | 1.316 | 0.064 |
| 1383041_x_at | AI044098 | --- | --- | 0.729 | 0.219 | 0.807 | 0.016 | 0.662 | 0.021 | 0.913 | 0.060 |
| 1382944_at   | AA891161 | --- | --- | 1.088 | 0.220 | 0.424 | 0.000 | 1.530 | 0.021 | 0.844 | 0.098 |
| 1397622_at   | AI578003 | --- | --- | 0.999 | 0.220 | 0.899 | 0.070 | 0.797 | 0.171 | 0.778 | 0.054 |
| 1395146_at   | BI290608 | --- | --- | 0.853 | 0.220 | 1.737 | 0.007 | 0.313 | 0.043 | 0.931 | 0.794 |
| 1389198_at   | AI179893 | --- | --- | 0.459 | 0.220 | 0.745 | 0.008 | 0.394 | 0.139 | 0.732 | 0.001 |
| 1383666_at   | BG378435 | --- | --- | 1.219 | 0.222 | 2.967 | 0.002 | 0.995 | 0.987 | 2.130 | 0.018 |
| 1374315_at   | AI228079 | --- | --- | 0.466 | 0.222 | 0.228 | 0.002 | 0.278 | 0.035 | 0.237 | 0.007 |
| 1367527_at   | AI600258 | --- | --- | 0.761 | 0.224 | 0.607 | 0.005 | 0.908 | 0.637 | 0.779 | 0.166 |
| 1381786_at   | BE114356 | --- | --- | 1.277 | 0.225 | 3.718 | 0.077 | 0.819 | 0.384 | 1.453 | 0.514 |
| 1376629_at   | AA946327 | --- | --- | 0.884 | 0.225 | 1.007 | 0.350 | 0.899 | 0.478 | 1.164 | 0.133 |
| 1376158_at   | BG373073 | --- | --- | 0.570 | 0.226 | 0.912 | 0.119 | 0.525 | 0.052 | 0.840 | 0.188 |
| 1389667_at   | AA944552 | --- | --- | 0.777 | 0.226 | 1.565 | 0.033 | 1.050 | 0.842 | 1.276 | 0.032 |
| 1395319_at   | BM383557 | --- | --- | 0.849 | 0.226 | 1.219 | 0.136 | 0.868 | 0.223 | 1.794 | 0.050 |
| 1397088_at   | BE110222 | --- | --- | 1.168 | 0.227 | 1.185 | 0.767 | 1.104 | 0.481 | 0.998 | 0.506 |
| 1398905_at   | BI285183 | --- | --- | 1.486 | 0.227 | 2.485 | 0.012 | 1.415 | 0.069 | 2.126 | 0.017 |
| 1379181_at   | BF405290 | --- | --- | 1.064 | 0.230 | 1.197 | 0.854 | 0.992 | 0.660 | 1.168 | 0.948 |
| 1382189_at   | AI574779 | --- | --- | 0.522 | 0.231 | 0.424 | 0.000 | 0.184 | 0.023 | 0.358 | 0.012 |
| 1389093_at   | BI281735 | --- | --- | 1.543 | 0.232 | 0.674 | 0.071 | 1.439 | 0.081 | 0.678 | 0.072 |
| 1381522_at   | BI280528 | --- | --- | 0.866 | 0.233 | 1.409 | 0.995 | 1.293 | 0.142 | 1.935 | 1.000 |
| 1389923_at   | BE104474 | --- | --- | 1.587 | 0.233 | 1.420 | 0.063 | 1.048 | 0.508 | 1.434 | 0.034 |
| 1386483_at   | AI639028 | --- | --- | 0.563 | 0.234 | 0.590 | 0.375 | 0.417 | 0.080 | 1.002 | 0.999 |
| 1384224_at   | BE120549 | --- | --- | 1.098 | 0.234 | 0.806 | 0.028 | 1.009 | 0.899 | 0.879 | 0.257 |
| 1392897_at   | AA924586 | --- | --- | 0.511 | 0.235 | 0.787 | 0.199 | 0.493 | 0.005 | 0.897 | 0.288 |
| 1389556_at   | BI286000 | --- | --- | 0.743 | 0.236 | 0.534 | 0.008 | 0.582 | 0.004 | 0.539 | 0.017 |
| 1379918_at   | BE115821 | --- | --- | 0.889 | 0.236 | 0.988 | 0.895 | 1.031 | 0.984 | 0.994 | 0.972 |
| 1392393_at   | AI501356 | --- | --- | 1.124 | 0.239 | 1.018 | 0.580 | 1.203 | 0.755 | 0.974 | 0.755 |
| 1385919_at   | AA957343 | --- | --- | 1.358 | 0.241 | 1.013 | 0.176 | 1.595 | 0.192 | 1.266 | 0.058 |
| 1383154_at   | H34497   | --- | --- | 1.149 | 0.242 | 0.766 | 0.086 | 1.579 | 0.046 | 0.958 | 0.238 |
| 1382539_at   | AI171022 | --- | --- | 0.799 | 0.243 | 0.478 | 0.187 | 0.756 | 0.410 | 0.415 | 0.078 |
| 1372862_at   | BM390237 | --- | --- | 0.820 | 0.244 | 1.305 | 0.159 | 0.614 | 0.001 | 1.062 | 0.917 |
| 1386148_at   | AI409284 | --- | --- | 0.753 | 0.245 | 0.684 | 0.192 | 1.455 | 0.021 | 0.789 | 0.759 |
| 1393333_at   | BF561617 | --- | --- | 1.320 | 0.247 | 1.857 | 0.090 | 1.190 | 0.472 | 1.537 | 0.627 |
| 1394459_at   | AI715738 | --- | --- | 0.834 | 0.247 | 0.529 | 0.061 | 1.294 | 0.433 | 0.472 | 0.042 |
| 1371870_at   | AI169493 | --- | --- | 0.980 | 0.248 | 1.047 | 0.486 | 1.038 | 0.525 | 0.893 | 0.024 |
| 1367500_at   | AI169461 | --- | --- | 1.169 | 0.248 | 1.236 | 0.313 | 0.671 | 0.054 | 1.136 | 0.112 |
| 1390367_at   | BF406195 | --- | --- | 0.695 | 0.248 | 1.137 | 0.979 | 0.294 | 0.007 | 0.881 | 0.440 |

|              |          |     |     |       |       |       |       |       |       |       |       |
|--------------|----------|-----|-----|-------|-------|-------|-------|-------|-------|-------|-------|
| 1384122_at   | AA996697 | --- | --- | 0.590 | 0.248 | 0.768 | 0.812 | 0.381 | 0.034 | 0.899 | 0.491 |
| 1396401_at   | AW433899 | --- | --- | 0.760 | 0.252 | 1.221 | 0.977 | 0.729 | 0.209 | 0.804 | 0.367 |
| 1378568_a_at | BM389379 | --- | --- | 1.580 | 0.253 | 2.364 | 0.002 | 0.774 | 0.009 | 1.500 | 0.012 |
| 1371795_at   | AA848795 | --- | --- | 0.658 | 0.256 | 0.422 | 0.018 | 0.768 | 0.002 | 0.423 | 0.017 |
| 1374106_at   | AI412389 | --- | --- | 0.979 | 0.257 | 1.033 | 0.408 | 2.131 | 0.036 | 3.414 | 0.025 |
| 1394943_at   | AA893197 | --- | --- | 0.746 | 0.257 | 0.409 | 0.012 | 1.049 | 0.739 | 0.717 | 0.025 |
| 1397230_at   | BE096562 | --- | --- | 0.777 | 0.258 | 1.506 | 0.284 | 1.564 | 0.501 | 1.326 | 0.412 |
| 1376608_at   | AI236535 | --- | --- | 1.067 | 0.258 | 1.095 | 0.233 | 1.434 | 0.047 | 1.698 | 0.026 |
| 1382538_at   | AI555902 | --- | --- | 0.832 | 0.258 | 0.710 | 0.191 | 1.110 | 0.441 | 0.771 | 0.118 |
| 1380530_at   | BF568014 | --- | --- | 0.993 | 0.259 | 0.999 | 0.998 | 1.018 | 0.733 | 0.993 | 0.988 |
| 1379591_at   | AI228518 | --- | --- | 0.618 | 0.259 | 0.307 | 0.000 | 0.660 | 0.318 | 0.474 | 0.105 |
| 1382010_at   | AI711537 | --- | --- | 0.517 | 0.260 | 2.126 | 0.041 | 0.307 | 0.024 | 1.783 | 0.057 |
| 1377114_at   | AI410861 | --- | --- | 0.710 | 0.260 | 0.602 | 0.048 | 0.897 | 0.515 | 0.750 | 0.222 |
| 1371727_at   | AA893350 | --- | --- | 0.495 | 0.261 | 0.264 | 0.000 | 0.695 | 0.312 | 0.513 | 0.028 |
| 1383735_at   | BI274202 | --- | --- | 0.998 | 0.261 | 1.001 | 0.642 | 1.080 | 0.760 | 1.341 | 0.025 |
| 1390770_at   | BF396139 | --- | --- | 0.999 | 0.262 | 1.426 | 0.468 | 1.080 | 0.697 | 0.737 | 0.215 |
| 1383860_at   | BI296947 | --- | --- | 1.096 | 0.263 | 3.247 | 0.019 | 1.068 | 0.161 | 1.912 | 0.045 |
| 1390020_at   | BI277513 | --- | --- | 0.694 | 0.263 | 0.444 | 0.000 | 0.751 | 0.027 | 0.551 | 0.029 |
| 1372655_at   | BG380323 | --- | --- | 0.437 | 0.263 | 0.580 | 0.004 | 0.379 | 0.014 | 0.517 | 0.027 |
| 1388854_at   | AI233309 | --- | --- | 0.674 | 0.264 | 1.350 | 0.012 | 0.807 | 0.172 | 1.233 | 0.015 |
| 1374351_at   | AI044117 | --- | --- | 0.859 | 0.264 | 0.737 | 0.003 | 0.846 | 0.167 | 0.812 | 0.158 |
| 1393500_at   | AI029289 | --- | --- | 1.253 | 0.265 | 0.996 | 0.493 | 1.013 | 0.914 | 1.002 | 0.522 |
| 1375423_at   | BE098181 | --- | --- | 0.410 | 0.266 | 0.518 | 0.102 | 0.164 | 0.002 | 0.432 | 0.125 |
| 1372730_at   | BF282327 | --- | --- | 0.590 | 0.266 | 1.105 | 0.620 | 0.522 | 0.042 | 0.684 | 0.435 |
| 1372742_at   | AI410058 | --- | --- | 0.595 | 0.267 | 1.210 | 0.214 | 0.552 | 0.260 | 1.157 | 0.438 |
| 1376180_at   | AW915012 | --- | --- | 0.615 | 0.269 | 0.912 | 0.653 | 0.975 | 0.511 | 1.114 | 0.226 |
| 1377886_at   | BI274321 | --- | --- | 2.738 | 0.270 | 0.835 | 0.732 | 2.310 | 0.174 | 0.637 | 0.197 |
| 1369631_at   | AI012566 | --- | --- | 0.734 | 0.272 | 1.146 | 0.154 | 0.537 | 0.014 | 1.033 | 0.182 |
| 1375422_at   | AI710284 | --- | --- | 1.127 | 0.272 | 0.818 | 0.670 | 0.915 | 0.335 | 1.167 | 0.990 |
| 1374316_at   | AI229612 | --- | --- | 0.993 | 0.274 | 1.270 | 0.118 | 1.623 | 0.398 | 1.303 | 0.004 |
| 1397586_at   | BI300588 | --- | --- | 0.757 | 0.274 | 0.781 | 0.049 | 0.837 | 0.444 | 0.938 | 0.045 |
| 1379247_at   | BI275237 | --- | --- | 0.874 | 0.274 | 0.521 | 0.018 | 0.832 | 0.064 | 0.696 | 0.030 |
| 1389866_at   | AI599296 | --- | --- | 0.733 | 0.274 | 0.856 | 0.249 | 0.638 | 0.055 | 0.771 | 0.077 |
| 1388386_at   | AA799822 | --- | --- | 0.724 | 0.275 | 0.655 | 0.007 | 0.814 | 0.087 | 0.710 | 0.027 |
| 1371531_at   | AI012962 | --- | --- | 0.702 | 0.276 | 0.427 | 0.000 | 0.768 | 0.572 | 0.495 | 0.023 |
| 1395413_at   | BE116600 | --- | --- | 1.151 | 0.276 | 0.773 | 0.126 | 1.751 | 0.159 | 0.700 | 0.128 |
| 1367543_at   | BG377443 | --- | --- | 1.147 | 0.276 | 2.505 | 0.048 | 0.999 | 0.576 | 1.477 | 0.319 |
| 1371938_at   | BM390336 | --- | --- | 0.785 | 0.277 | 1.325 | 0.029 | 0.692 | 0.113 | 1.163 | 0.106 |
| 1372608_at   | BM388814 | --- | --- | 0.765 | 0.277 | 1.018 | 0.493 | 0.988 | 0.952 | 1.198 | 0.540 |
| 1372032_at   | AA851914 | --- | --- | 1.448 | 0.277 | 1.016 | 0.550 | 1.932 | 0.018 | 1.045 | 0.612 |
| 1394042_at   | AI011673 | --- | --- | 1.187 | 0.277 | 0.970 | 0.028 | 1.023 | 0.733 | 0.999 | 0.978 |
| 1396291_at   | BI290733 | --- | --- | 0.890 | 0.277 | 0.677 | 0.154 | 0.959 | 0.448 | 1.460 | 0.323 |
| 1385916_at   | AI639015 | --- | --- | 1.311 | 0.278 | 0.946 | 0.649 | 1.386 | 0.012 | 0.896 | 0.415 |
| 1385133_at   | BF388651 | --- | --- | 0.724 | 0.278 | 1.160 | 0.115 | 0.839 | 0.964 | 0.978 | 0.678 |
| 1374380_at   | BF403474 | --- | --- | 0.414 | 0.278 | 0.417 | 0.004 | 0.649 | 0.259 | 0.386 | 0.001 |
| 1389546_at   | BF418582 | --- | --- | 0.999 | 0.279 | 1.439 | 0.825 | 1.780 | 0.064 | 0.787 | 0.040 |
| 1371399_at   | AA818196 | --- | --- | 0.655 | 0.279 | 1.531 | 0.043 | 0.655 | 0.001 | 1.330 | 0.038 |
| 1381773_at   | BM383335 | --- | --- | 0.794 | 0.280 | 1.000 | 0.530 | 0.690 | 0.029 | 0.604 | 0.021 |
| 1386185_at   | H31802   | --- | --- | 1.466 | 0.282 | 1.231 | 0.459 | 1.490 | 0.294 | 0.615 | 0.043 |
| 1389186_at   | AA944175 | --- | --- | 1.375 | 0.282 | 0.333 | 0.069 | 1.092 | 0.966 | 0.922 | 0.622 |
| 1384887_at   | AI070185 | --- | --- | 0.783 | 0.282 | 0.475 | 0.059 | 0.781 | 0.296 | 0.532 | 0.400 |
| 1382104_at   | AI113277 | --- | --- | 0.810 | 0.283 | 1.738 | 0.068 | 0.591 | 0.054 | 1.689 | 0.006 |
| 1396244_at   | AA964859 | --- | --- | 0.884 | 0.283 | 0.973 | 0.520 | 1.008 | 0.934 | 0.966 | 0.974 |
| 1372477_at   | BG373744 | --- | --- | 1.315 | 0.285 | 0.920 | 0.042 | 1.255 | 0.691 | 0.855 | 0.014 |
| 1374185_at   | AI232819 | --- | --- | 0.452 | 0.287 | 0.824 | 0.997 | 0.488 | 0.029 | 0.797 | 0.267 |
| 1379222_at   | BE120167 | --- | --- | 1.897 | 0.287 | 1.736 | 0.137 | 2.792 | 0.024 | 2.495 | 0.103 |
| 1394524_at   | AW921279 | --- | --- | 0.744 | 0.287 | 0.217 | 0.017 | 0.442 | 0.065 | 0.201 | 0.003 |
| 1372537_at   | BI289642 | --- | --- | 1.192 | 0.288 | 0.751 | 0.124 | 4.545 | 0.028 | 0.846 | 0.949 |
| 1397155_at   | BF393137 | --- | --- | 0.936 | 0.289 | 0.817 | 0.315 | 0.715 | 0.064 | 0.933 | 0.670 |
| 1381864_at   | AI059122 | --- | --- | 0.618 | 0.290 | 4.028 | 0.040 | 0.608 | 0.345 | 2.022 | 0.049 |
| 1367504_at   | AI411286 | --- | --- | 0.764 | 0.291 | 1.266 | 0.048 | 0.586 | 0.048 | 1.104 | 0.998 |

|              |          |     |     |       |       |       |       |       |       |       |       |
|--------------|----------|-----|-----|-------|-------|-------|-------|-------|-------|-------|-------|
| 1385780_at   | BF416348 | --- | --- | 1.780 | 0.291 | 0.984 | 0.723 | 1.180 | 0.135 | 0.999 | 0.952 |
| 1372465_at   | AI409184 | --- | --- | 0.734 | 0.291 | 1.166 | 0.244 | 0.970 | 0.795 | 1.223 | 0.924 |
| 1398966_at   | AI169154 | --- | --- | 0.526 | 0.292 | 1.021 | 0.867 | 0.419 | 0.001 | 0.908 | 0.840 |
| 1383004_at   | BF397074 | --- | --- | 0.530 | 0.294 | 0.515 | 0.030 | 0.545 | 0.100 | 0.294 | 0.003 |
| 1390345_at   | BG375523 | --- | --- | 0.579 | 0.294 | 0.501 | 0.007 | 0.885 | 0.847 | 0.367 | 0.058 |
| 1386439_at   | H31323   | --- | --- | 1.098 | 0.294 | 0.436 | 0.142 | 0.463 | 0.135 | 0.528 | 0.676 |
| 1381682_at   | BE106750 | --- | --- | 2.570 | 0.295 | 1.860 | 0.035 | 2.511 | 0.153 | 1.075 | 0.213 |
| 1382092_at   | AA965250 | --- | --- | 1.151 | 0.301 | 0.392 | 0.070 | 1.548 | 0.046 | 0.760 | 0.333 |
| 1388954_at   | BI295749 | --- | --- | 0.960 | 0.302 | 0.780 | 0.978 | 0.616 | 0.056 | 1.008 | 0.894 |
| 1383129_at   | AI072254 | --- | --- | 0.584 | 0.302 | 0.511 | 0.033 | 0.692 | 0.014 | 0.583 | 0.111 |
| 1376634_a_at | BE109067 | --- | --- | 0.999 | 0.302 | 1.006 | 0.500 | 1.067 | 0.283 | 1.316 | 0.023 |
| 1386029_at   | BF284035 | --- | --- | 1.463 | 0.303 | 0.479 | 0.005 | 1.067 | 0.435 | 0.817 | 0.062 |
| 1392837_at   | AA859108 | --- | --- | 0.711 | 0.305 | 1.031 | 0.196 | 1.095 | 0.540 | 1.020 | 0.735 |
| 1373173_at   | BM390182 | --- | --- | 1.580 | 0.305 | 0.981 | 0.843 | 1.438 | 0.032 | 1.175 | 0.946 |
| 1382318_at   | AA964856 | --- | --- | 0.906 | 0.308 | 0.715 | 0.029 | 0.695 | 0.151 | 0.746 | 0.044 |
| 1371543_at   | AI170047 | --- | --- | 0.768 | 0.309 | 1.324 | 0.002 | 0.822 | 0.024 | 1.297 | 0.013 |
| 1388647_at   | AI233753 | --- | --- | 0.536 | 0.309 | 0.803 | 0.092 | 0.651 | 0.016 | 1.008 | 0.312 |
| 1373394_at   | BM391986 | --- | --- | 0.533 | 0.309 | 0.757 | 0.956 | 0.757 | 0.104 | 0.969 | 0.674 |
| 1380890_at   | BE118102 | --- | --- | 1.241 | 0.310 | 0.597 | 0.064 | 1.302 | 0.320 | 0.737 | 0.269 |
| 1374438_at   | AI103962 | --- | --- | 1.117 | 0.310 | 1.885 | 0.003 | 1.063 | 0.767 | 1.847 | 0.035 |
| 1396671_at   | BF400889 | --- | --- | 1.848 | 0.311 | 2.200 | 0.301 | 2.727 | 0.033 | 2.139 | 0.316 |
| 1377445_at   | BF388223 | --- | --- | 0.975 | 0.312 | 0.176 | 0.022 | 2.915 | 0.070 | 0.186 | 0.015 |
| 1385211_at   | BE116091 | --- | --- | 0.712 | 0.312 | 0.901 | 0.542 | 0.763 | 0.629 | 0.978 | 0.429 |
| 1375906_at   | BM389920 | --- | --- | 0.782 | 0.313 | 0.942 | 0.553 | 0.786 | 0.230 | 0.964 | 0.620 |
| 1397644_at   | BI278369 | --- | --- | 1.418 | 0.314 | 2.940 | 0.005 | 1.422 | 0.073 | 2.655 | 0.011 |
| 1392895_at   | BE101114 | --- | --- | 0.669 | 0.315 | 0.679 | 0.003 | 0.557 | 0.020 | 0.638 | 0.005 |
| 1383520_at   | AA859127 | --- | --- | 1.052 | 0.315 | 0.626 | 0.060 | 0.947 | 0.620 | 0.732 | 0.614 |
| 1376310_at   | BI285686 | --- | --- | 0.410 | 0.316 | 0.442 | 0.003 | 0.560 | 0.018 | 0.443 | 0.072 |
| 1384963_at   | BI277632 | --- | --- | 1.309 | 0.316 | 1.011 | 0.945 | 1.011 | 0.506 | 1.040 | 0.782 |
| 1399115_at   | AI411999 | --- | --- | 1.096 | 0.317 | 1.082 | 0.286 | 1.086 | 0.563 | 1.359 | 0.085 |
| 1385220_at   | BG377563 | --- | --- | 1.224 | 0.317 | 0.996 | 0.939 | 0.966 | 0.488 | 0.999 | 0.588 |
| 1374504_at   | BF415402 | --- | --- | 0.847 | 0.317 | 0.840 | 0.193 | 1.189 | 0.416 | 1.002 | 0.984 |
| 1375629_at   | AI230371 | --- | --- | 0.523 | 0.318 | 0.876 | 0.964 | 0.510 | 0.341 | 0.781 | 0.437 |
| 1372447_at   | BI275155 | --- | --- | 1.095 | 0.319 | 0.989 | 0.955 | 1.007 | 0.774 | 0.995 | 0.704 |
| 1376621_at   | BM390561 | --- | --- | 0.578 | 0.321 | 0.760 | 0.213 | 1.001 | 0.341 | 0.756 | 0.060 |
| 1384101_at   | BM388523 | --- | --- | 1.567 | 0.323 | 3.117 | 0.000 | 1.509 | 0.739 | 1.244 | 0.319 |
| 1377885_at   | BI281851 | --- | --- | 0.876 | 0.324 | 1.605 | 0.010 | 0.907 | 0.052 | 1.058 | 0.562 |
| 1372659_at   | BE113269 | --- | --- | 1.446 | 0.327 | 1.919 | 0.002 | 1.432 | 0.142 | 1.793 | 0.004 |
| 1379576_at   | AA848479 | --- | --- | 0.599 | 0.327 | 1.011 | 0.246 | 0.935 | 0.824 | 1.058 | 0.845 |
| 1376068_at   | BF283674 | --- | --- | 0.922 | 0.327 | 0.801 | 0.979 | 0.752 | 0.608 | 0.999 | 0.996 |
| 1391161_at   | BE107322 | --- | --- | 1.563 | 0.328 | 2.687 | 0.008 | 1.632 | 0.027 | 1.789 | 0.044 |
| 1381977_at   | BI299008 | --- | --- | 0.827 | 0.328 | 0.573 | 0.009 | 0.810 | 0.612 | 0.941 | 0.199 |
| 1394476_at   | AW535213 | --- | --- | 0.795 | 0.328 | 0.521 | 0.002 | 0.504 | 0.023 | 0.647 | 0.008 |
| 1382691_at   | AI234943 | --- | --- | 0.843 | 0.332 | 1.487 | 0.140 | 1.198 | 0.392 | 1.313 | 0.416 |
| 1385964_at   | AI237569 | --- | --- | 0.626 | 0.333 | 0.449 | 0.062 | 0.480 | 0.008 | 0.509 | 0.055 |
| 1385503_at   | BM387442 | --- | --- | 0.592 | 0.333 | 0.305 | 0.014 | 0.401 | 0.376 | 0.328 | 0.007 |
| 1375186_at   | AI169144 | --- | --- | 0.678 | 0.333 | 1.681 | 0.132 | 0.604 | 0.007 | 1.217 | 0.485 |
| 1393813_at   | BF388771 | --- | --- | 1.168 | 0.335 | 1.187 | 0.403 | 1.093 | 0.142 | 0.880 | 0.230 |
| 1376875_at   | AI454691 | --- | --- | 1.208 | 0.336 | 1.148 | 0.651 | 0.755 | 0.055 | 0.982 | 0.870 |
| 1373260_at   | AI412606 | --- | --- | 1.487 | 0.336 | 0.772 | 0.006 | 1.994 | 0.352 | 0.910 | 0.598 |
| 1379242_at   | BI275646 | --- | --- | 0.793 | 0.338 | 0.620 | 0.031 | 0.843 | 0.438 | 0.825 | 0.200 |
| 1388707_at   | BF284919 | --- | --- | 1.010 | 0.339 | 1.138 | 0.085 | 0.594 | 0.747 | 1.032 | 0.291 |
| 1375029_at   | AI235912 | --- | --- | 1.113 | 0.339 | 2.953 | 0.000 | 1.790 | 0.157 | 1.811 | 0.005 |
| 1397813_at   | AW915896 | --- | --- | 1.020 | 0.340 | 0.962 | 0.313 | 1.007 | 0.973 | 0.954 | 0.498 |
| 1383305_at   | AW530081 | --- | --- | 1.052 | 0.340 | 1.124 | 0.645 | 1.275 | 0.192 | 0.761 | 0.286 |
| 1389196_at   | AI180051 | --- | --- | 0.527 | 0.341 | 0.780 | 0.290 | 0.413 | 0.022 | 0.843 | 0.489 |
| 1372996_at   | AI411245 | --- | --- | 0.535 | 0.341 | 0.684 | 0.110 | 0.795 | 0.077 | 0.609 | 0.162 |
| 1388357_at   | BI282972 | --- | --- | 1.103 | 0.343 | 0.566 | 0.064 | 1.141 | 0.495 | 0.463 | 0.025 |
| 1377149_at   | BM386122 | --- | --- | 0.859 | 0.343 | 0.567 | 0.040 | 0.866 | 0.069 | 0.566 | 0.006 |
| 1388119_at   | BM392140 | --- | --- | 0.970 | 0.346 | 1.194 | 0.140 | 0.873 | 0.707 | 0.986 | 0.429 |
| 1371694_at   | AI317805 | --- | --- | 0.941 | 0.348 | 0.733 | 0.001 | 0.981 | 0.596 | 0.768 | 0.026 |

|              |          |     |     |       |       |       |       |       |       |       |       |
|--------------|----------|-----|-----|-------|-------|-------|-------|-------|-------|-------|-------|
| 1383931_at   | AA901043 | --- | --- | 0.803 | 0.350 | 0.178 | 0.003 | 1.279 | 0.347 | 0.176 | 0.006 |
| 1372385_at   | AA957292 | --- | --- | 1.387 | 0.350 | 1.886 | 0.008 | 1.586 | 0.718 | 1.296 | 0.016 |
| 1383799_at   | BF567886 | --- | --- | 1.308 | 0.350 | 1.142 | 0.293 | 1.081 | 0.385 | 1.482 | 0.956 |
| 1374687_at   | BF283386 | --- | --- | 1.054 | 0.351 | 0.645 | 0.013 | 0.687 | 0.127 | 0.664 | 0.000 |
| 1378099_at   | AI412479 | --- | --- | 0.769 | 0.353 | 0.528 | 0.023 | 0.775 | 0.107 | 0.597 | 0.129 |
| 1376517_at   | AW530281 | --- | --- | 1.001 | 0.353 | 0.999 | 0.963 | 1.001 | 0.260 | 1.002 | 0.982 |
| 1389957_at   | BG378149 | --- | --- | 0.782 | 0.353 | 1.293 | 0.634 | 1.355 | 0.867 | 0.705 | 0.209 |
| 1383092_a_at | BE115060 | --- | --- | 0.839 | 0.354 | 1.766 | 0.002 | 0.544 | 0.355 | 1.574 | 0.001 |
| 1375944_at   | AA849497 | --- | --- | 0.618 | 0.356 | 1.433 | 0.209 | 0.781 | 0.351 | 1.107 | 0.234 |
| 1381111_at   | BI275744 | --- | --- | 1.113 | 0.357 | 1.124 | 0.480 | 0.993 | 0.952 | 1.002 | 0.694 |
| 1389835_at   | AI598405 | --- | --- | 0.574 | 0.359 | 1.010 | 0.557 | 0.350 | 0.020 | 0.763 | 0.905 |
| 1385538_at   | AI059209 | --- | --- | 1.002 | 0.359 | 1.203 | 0.178 | 1.441 | 0.225 | 1.161 | 0.632 |
| 1375077_at   | BE099881 | --- | --- | 1.014 | 0.361 | 0.759 | 0.401 | 1.195 | 0.579 | 1.288 | 0.093 |
| 1391302_at   | BE098463 | --- | --- | 0.763 | 0.362 | 0.248 | 0.001 | 0.907 | 0.712 | 0.144 | 0.002 |
| 1383359_at   | BI389176 | --- | --- | 0.427 | 0.363 | 1.346 | 0.135 | 0.433 | 0.009 | 0.955 | 0.199 |
| 1378263_at   | BF403483 | --- | --- | 0.629 | 0.363 | 0.432 | 0.008 | 0.954 | 0.752 | 0.609 | 0.026 |
| 1375988_at   | AW914928 | --- | --- | 0.949 | 0.364 | 0.773 | 0.018 | 1.180 | 0.969 | 0.645 | 0.380 |
| 1377042_at   | BI288196 | --- | --- | 1.021 | 0.365 | 2.251 | 0.002 | 1.693 | 0.125 | 2.357 | 0.001 |
| 1389005_at   | BI282843 | --- | --- | 0.736 | 0.365 | 0.631 | 0.093 | 0.864 | 0.074 | 0.578 | 0.099 |
| 1391867_at   | BI293159 | --- | --- | 0.997 | 0.367 | 1.167 | 0.386 | 1.003 | 0.669 | 0.858 | 0.437 |
| 1380090_at   | BF407443 | --- | --- | 0.787 | 0.368 | 0.994 | 0.359 | 0.777 | 0.136 | 1.005 | 0.492 |
| 1390023_at   | AI171686 | --- | --- | 1.046 | 0.369 | 0.946 | 0.162 | 1.749 | 0.019 | 0.849 | 0.088 |
| 1399116_at   | AI171781 | --- | --- | 1.046 | 0.372 | 1.182 | 0.036 | 0.823 | 0.083 | 1.148 | 0.080 |
| 1373974_at   | BE110545 | --- | --- | 0.764 | 0.377 | 1.209 | 0.075 | 0.772 | 0.129 | 0.802 | 0.145 |
| 1396479_at   | BF420007 | --- | --- | 1.072 | 0.378 | 1.063 | 0.282 | 1.068 | 0.738 | 1.007 | 0.946 |
| 1375062_at   | BM392237 | --- | --- | 0.711 | 0.380 | 0.338 | 0.010 | 0.720 | 0.429 | 0.487 | 0.015 |
| 1385836_at   | AI454586 | --- | --- | 0.891 | 0.381 | 0.597 | 0.001 | 0.827 | 0.667 | 0.716 | 0.003 |
| 1374201_at   | AI712727 | --- | --- | 0.813 | 0.381 | 0.649 | 0.014 | 0.986 | 0.603 | 0.713 | 0.021 |
| 1394946_at   | BI289481 | --- | --- | 1.524 | 0.383 | 0.430 | 0.781 | 1.126 | 0.048 | 0.568 | 0.189 |
| 1382126_at   | AW528959 | --- | --- | 0.536 | 0.383 | 0.489 | 0.013 | 0.936 | 0.762 | 0.679 | 0.016 |
| 1375289_at   | BM387047 | --- | --- | 0.573 | 0.384 | 1.522 | 0.164 | 0.955 | 0.780 | 1.165 | 0.977 |
| 1371844_at   | AW144530 | --- | --- | 0.623 | 0.384 | 0.550 | 0.000 | 0.746 | 0.053 | 0.554 | 0.001 |
| 1371393_at   | AA851222 | --- | --- | 0.371 | 0.384 | 0.265 | 0.023 | 0.565 | 0.079 | 0.236 | 0.004 |
| 1388571_at   | BF285314 | --- | --- | 0.662 | 0.384 | 1.389 | 0.018 | 1.215 | 0.856 | 1.906 | 0.002 |
| 1399113_at   | AI111683 | --- | --- | 0.897 | 0.384 | 0.808 | 0.013 | 1.127 | 0.591 | 0.680 | 0.001 |
| 1383633_at   | BI289884 | --- | --- | 0.599 | 0.385 | 0.496 | 0.001 | 1.063 | 0.586 | 0.651 | 0.061 |
| 1376089_at   | BI294974 | --- | --- | 0.847 | 0.386 | 0.970 | 0.646 | 0.885 | 0.859 | 0.739 | 0.019 |
| 1383941_at   | BF411395 | --- | --- | 0.798 | 0.386 | 3.160 | 0.008 | 0.834 | 0.281 | 1.878 | 0.033 |
| 1382014_at   | AW521951 | --- | --- | 0.893 | 0.388 | 0.629 | 0.006 | 0.769 | 0.038 | 0.768 | 0.003 |
| 1393470_at   | BE097303 | --- | --- | 0.959 | 0.388 | 0.941 | 0.087 | 1.214 | 0.530 | 1.022 | 0.089 |
| 1384046_at   | BF543195 | --- | --- | 1.516 | 0.389 | 0.960 | 0.219 | 1.022 | 0.819 | 0.843 | 0.242 |
| 1381906_at   | AA944304 | --- | --- | 0.931 | 0.390 | 1.059 | 0.468 | 1.339 | 0.478 | 0.934 | 0.889 |
| 1396489_at   | BF404442 | --- | --- | 0.954 | 0.391 | 0.119 | 0.001 | 0.936 | 0.508 | 0.154 | 0.000 |
| 1374662_at   | AA891848 | --- | --- | 1.030 | 0.392 | 0.274 | 0.004 | 1.056 | 0.257 | 0.709 | 0.084 |
| 1372948_at   | BG376761 | --- | --- | 0.476 | 0.394 | 0.669 | 0.133 | 0.466 | 0.020 | 0.888 | 0.678 |
| 1377595_at   | AI044347 | --- | --- | 1.387 | 0.395 | 2.146 | 0.066 | 1.466 | 0.809 | 1.664 | 0.053 |
| 1384810_at   | BF393740 | --- | --- | 0.832 | 0.395 | 1.169 | 0.094 | 0.835 | 0.727 | 1.253 | 0.081 |
| 1389661_at   | AI599413 | --- | --- | 0.850 | 0.398 | 0.935 | 0.045 | 0.933 | 0.750 | 0.982 | 0.051 |
| 1394834_at   | BF393831 | --- | --- | 1.126 | 0.400 | 1.721 | 0.100 | 1.000 | 0.917 | 0.999 | 0.990 |
| 1390178_at   | BM387756 | --- | --- | 0.568 | 0.400 | 1.130 | 0.111 | 0.645 | 0.035 | 1.014 | 0.822 |
| 1376737_at   | BE110674 | --- | --- | 1.005 | 0.404 | 3.269 | 0.005 | 0.854 | 0.402 | 2.432 | 0.004 |
| 1384171_x_at | AA900477 | --- | --- | 1.064 | 0.405 | 0.733 | 0.015 | 0.998 | 0.948 | 0.666 | 0.018 |
| 1386006_at   | AA866456 | --- | --- | 0.804 | 0.406 | 0.893 | 0.500 | 1.059 | 0.809 | 0.880 | 0.285 |
| 1397962_at   | BF405788 | --- | --- | 0.879 | 0.407 | 0.557 | 0.094 | 0.943 | 0.377 | 0.532 | 0.151 |
| 1379256_at   | BF397911 | --- | --- | 1.139 | 0.410 | 0.854 | 0.217 | 1.395 | 0.045 | 0.960 | 0.345 |
| 1389544_at   | BG669998 | --- | --- | 0.814 | 0.412 | 1.038 | 0.382 | 0.743 | 0.002 | 1.046 | 0.339 |
| 1380392_at   | BF406259 | --- | --- | 1.734 | 0.413 | 1.058 | 0.943 | 1.367 | 0.405 | 1.471 | 0.231 |
| 1390447_at   | BI295918 | --- | --- | 1.265 | 0.415 | 1.798 | 0.006 | 1.006 | 0.273 | 1.291 | 0.122 |
| 1397604_at   | BE128641 | --- | --- | 1.368 | 0.415 | 1.943 | 0.100 | 1.056 | 0.471 | 1.186 | 0.197 |
| 1372678_at   | AA800044 | --- | --- | 1.111 | 0.417 | 1.244 | 0.071 | 0.605 | 0.038 | 1.297 | 0.037 |
| 1392162_at   | BF391447 | --- | --- | 0.561 | 0.417 | 3.145 | 0.050 | 0.779 | 0.115 | 1.489 | 0.037 |

|              |           |     |     |       |       |        |       |       |       |       |       |
|--------------|-----------|-----|-----|-------|-------|--------|-------|-------|-------|-------|-------|
| 1372336_at   | BE115454  | --- | --- | 1.016 | 0.418 | 0.806  | 0.034 | 0.849 | 0.137 | 0.873 | 0.020 |
| 1371323_at   | BG666002  | --- | --- | 0.756 | 0.419 | 0.332  | 0.007 | 0.755 | 0.279 | 0.482 | 0.015 |
| 1385401_at   | BI290381  | --- | --- | 0.716 | 0.420 | 0.744  | 0.011 | 0.730 | 0.092 | 1.066 | 0.536 |
| 1382172_at   | AI228660  | --- | --- | 1.013 | 0.420 | 0.958  | 0.713 | 0.998 | 0.910 | 0.968 | 0.727 |
| 1393951_at   | BI302706  | --- | --- | 0.913 | 0.420 | 1.845  | 0.030 | 0.795 | 0.801 | 1.847 | 0.001 |
| 1380080_at   | AW535933  | --- | --- | 0.807 | 0.423 | 0.999  | 0.995 | 0.819 | 0.415 | 1.000 | 0.986 |
| 1373043_at   | BI275923  | --- | --- | 0.590 | 0.425 | 1.494  | 0.008 | 0.741 | 0.106 | 1.083 | 0.470 |
| 1377176_at   | BG381076  | --- | --- | 0.826 | 0.425 | 1.027  | 0.072 | 0.759 | 0.139 | 1.096 | 0.512 |
| 1389406_at   | BI296349  | --- | --- | 0.748 | 0.425 | 0.647  | 0.203 | 0.797 | 0.026 | 0.704 | 0.331 |
| 1389110_at   | AI639387  | --- | --- | 1.283 | 0.427 | 1.846  | 0.041 | 1.481 | 0.042 | 1.952 | 0.037 |
| 1397575_at   | BF415880  | --- | --- | 0.857 | 0.427 | 0.119  | 0.004 | 0.969 | 0.925 | 0.257 | 0.007 |
| 1397913_at   | AW526277  | --- | --- | 1.165 | 0.428 | 0.678  | 0.144 | 0.729 | 0.667 | 1.204 | 0.291 |
| 1371848_at   | AA799526  | --- | --- | 0.622 | 0.429 | 1.734  | 0.014 | 0.612 | 0.014 | 1.653 | 0.010 |
| 1396477_at   | AI010663  | --- | --- | 1.245 | 0.429 | 1.034  | 0.837 | 1.207 | 0.192 | 1.074 | 0.843 |
| 1378308_at   | AI231054  | --- | --- | 0.904 | 0.430 | 1.660  | 0.094 | 0.990 | 0.153 | 1.082 | 0.678 |
| 1392707_at   | AA946455  | --- | --- | 1.792 | 0.430 | 1.045  | 0.170 | 1.195 | 0.834 | 1.228 | 0.409 |
| 1389220_at   | BE112918  | --- | --- | 0.634 | 0.432 | 0.851  | 0.187 | 0.355 | 0.001 | 0.934 | 0.029 |
| 1388663_at   | AI100783  | --- | --- | 1.350 | 0.432 | 12.406 | 0.000 | 1.161 | 0.171 | 7.655 | 0.002 |
| 1375049_at   | AI711132  | --- | --- | 0.865 | 0.432 | 0.999  | 0.995 | 0.849 | 0.161 | 0.999 | 0.979 |
| 1377719_a_at | AA892765  | --- | --- | 0.789 | 0.433 | 0.910  | 0.227 | 0.943 | 0.575 | 0.912 | 0.750 |
| 1383669_at   | AI556424  | --- | --- | 0.822 | 0.435 | 0.684  | 0.245 | 0.822 | 0.999 | 0.602 | 0.163 |
| 1384290_at   | BG373809  | --- | --- | 0.664 | 0.436 | 0.431  | 0.031 | 0.629 | 0.004 | 0.626 | 0.378 |
| 1384357_at   | BG665592  | --- | --- | 1.188 | 0.436 | 0.500  | 0.073 | 1.382 | 0.422 | 0.506 | 0.020 |
| 1395857_at   | AI717309  | --- | --- | 0.857 | 0.436 | 1.002  | 0.991 | 0.678 | 0.023 | 1.121 | 0.917 |
| 1392156_at   | BF388086  | --- | --- | 1.411 | 0.437 | 1.172  | 0.375 | 0.858 | 0.357 | 0.993 | 0.978 |
| 1367513_at   | BI284935  | --- | --- | 0.804 | 0.437 | 0.581  | 0.005 | 0.832 | 0.282 | 0.452 | 0.002 |
| 1392883_at   | AI013730  | --- | --- | 1.309 | 0.437 | 2.429  | 0.014 | 0.698 | 0.346 | 1.140 | 0.412 |
| 1382222_at   | BI293607  | --- | --- | 0.814 | 0.438 | 1.425  | 0.053 | 0.926 | 0.582 | 0.925 | 0.407 |
| 1380445_at   | BI294409  | --- | --- | 2.074 | 0.440 | 1.680  | 0.052 | 1.400 | 0.785 | 1.474 | 0.133 |
| 1368852_at   | BG668811  | --- | --- | 0.669 | 0.442 | 0.652  | 0.009 | 0.973 | 0.897 | 0.793 | 0.002 |
| 1380504_at   | BI282488  | --- | --- | 0.963 | 0.444 | 0.386  | 0.087 | 1.161 | 0.456 | 0.698 | 0.199 |
| 1396223_at   | AW252930  | --- | --- | 0.684 | 0.444 | 0.944  | 0.809 | 0.569 | 0.055 | 0.835 | 0.745 |
| 1376851_at   | AW520324  | --- | --- | 0.996 | 0.448 | 0.998  | 0.963 | 0.891 | 0.972 | 0.998 | 0.960 |
| 1388546_at   | AI013328  | --- | --- | 0.850 | 0.453 | 0.694  | 0.056 | 0.654 | 0.044 | 0.509 | 0.042 |
| 1388489_at   | AA875107  | --- | --- | 0.843 | 0.453 | 1.070  | 0.913 | 0.879 | 0.895 | 1.013 | 0.567 |
| 1383586_at   | BI295793  | --- | --- | 1.117 | 0.455 | 2.851  | 0.067 | 1.040 | 0.853 | 1.795 | 0.361 |
| 1398706_at   | BI294633  | --- | --- | 1.107 | 0.456 | 3.655  | 0.026 | 1.131 | 0.653 | 1.914 | 0.054 |
| 1382233_a_at | AI030449  | --- | --- | 0.827 | 0.456 | 0.632  | 0.045 | 0.812 | 0.449 | 1.082 | 0.425 |
| 1391349_at   | BG375114  | --- | --- | 0.892 | 0.457 | 1.050  | 0.963 | 1.005 | 0.627 | 0.996 | 0.969 |
| 1395432_at   | AI716103  | --- | --- | 1.443 | 0.458 | 0.999  | 0.892 | 1.142 | 0.978 | 0.938 | 0.418 |
| 1385351_at   | AW528754  | --- | --- | 0.767 | 0.459 | 1.034  | 0.762 | 1.296 | 0.404 | 1.000 | 0.313 |
| 1374513_at   | BM389104  | --- | --- | 0.894 | 0.459 | 0.820  | 0.028 | 0.934 | 0.759 | 0.822 | 0.062 |
| 1378493_at   | BE117901  | --- | --- | 0.860 | 0.460 | 1.404  | 0.278 | 0.661 | 0.245 | 1.020 | 0.510 |
| 1377891_at   | AI407265  | --- | --- | 0.498 | 0.461 | 1.342  | 0.221 | 0.913 | 0.790 | 0.789 | 0.337 |
| 1388404_at   | AA799724  | --- | --- | 0.806 | 0.461 | 1.522  | 0.029 | 0.433 | 0.004 | 1.125 | 0.288 |
| 1376076_at   | BI282296  | --- | --- | 1.153 | 0.462 | 7.785  | 0.000 | 1.393 | 0.078 | 6.822 | 0.000 |
| 1374297_at   | BE100843  | --- | --- | 0.623 | 0.464 | 0.882  | 0.044 | 0.453 | 0.008 | 0.728 | 0.004 |
| 1381826_at   | AI070839  | --- | --- | 0.593 | 0.468 | 0.392  | 0.011 | 0.794 | 0.494 | 0.872 | 0.450 |
| 1390419_a_at | AI454905  | --- | --- | 0.771 | 0.468 | 0.560  | 0.002 | 0.843 | 0.439 | 0.584 | 0.032 |
| 1399080_at   | BI292036  | --- | --- | 0.591 | 0.468 | 0.511  | 0.005 | 0.460 | 0.081 | 0.410 | 0.011 |
| 1395632_at   | AI715532  | --- | --- | 0.895 | 0.469 | 0.661  | 0.892 | 1.008 | 0.213 | 0.800 | 0.185 |
| 1377243_at   | AI172211  | --- | --- | 1.073 | 0.470 | 0.660  | 0.135 | 0.884 | 0.562 | 1.071 | 0.318 |
| 1384213_at   | AA955944  | --- | --- | 1.058 | 0.471 | 0.889  | 0.322 | 1.106 | 0.191 | 0.777 | 0.089 |
| 1376787_at   | BE097267  | --- | --- | 0.609 | 0.471 | 0.224  | 0.043 | 0.742 | 0.046 | 0.559 | 0.378 |
| 1369410_at   | NM_053584 | --- | --- | 0.974 | 0.471 | 0.856  | 0.073 | 0.957 | 0.262 | 0.934 | 0.056 |
| 1393125_a_at | AA955445  | --- | --- | 1.266 | 0.472 | 1.338  | 0.103 | 0.700 | 0.796 | 0.992 | 0.550 |
| 1392872_at   | BF397413  | --- | --- | 0.960 | 0.473 | 1.545  | 0.012 | 0.969 | 0.556 | 1.369 | 0.014 |
| 1381844_at   | BM389974  | --- | --- | 0.705 | 0.474 | 0.347  | 0.018 | 1.001 | 0.540 | 0.484 | 0.017 |
| 1389428_at   | AI104431  | --- | --- | 0.716 | 0.474 | 0.776  | 0.012 | 0.700 | 0.029 | 0.820 | 0.054 |
| 1385326_at   | BI275550  | --- | --- | 1.192 | 0.475 | 1.328  | 0.287 | 0.921 | 0.368 | 0.914 | 0.049 |
| 1376272_s_at | AI178914  | --- | --- | 0.959 | 0.475 | 0.924  | 0.079 | 1.375 | 0.127 | 1.088 | 0.355 |



|              |          |     |     |       |       |       |       |       |       |       |       |
|--------------|----------|-----|-----|-------|-------|-------|-------|-------|-------|-------|-------|
| 1373883_at   | BE102485 | --- | --- | 1.141 | 0.475 | 0.810 | 0.219 | 2.420 | 0.085 | 0.958 | 0.866 |
| 1381661_at   | BF394303 | --- | --- | 1.284 | 0.476 | 0.937 | 0.505 | 1.036 | 0.837 | 0.894 | 0.271 |
| 1378936_at   | AW533986 | --- | --- | 0.693 | 0.476 | 1.535 | 0.003 | 1.309 | 0.599 | 1.767 | 0.156 |
| 1379855_at   | BF413298 | --- | --- | 0.856 | 0.476 | 1.274 | 0.568 | 1.045 | 0.936 | 0.992 | 0.958 |
| 1383626_at   | BI274049 | --- | --- | 0.537 | 0.476 | 1.278 | 0.250 | 0.702 | 0.163 | 1.376 | 0.241 |
| 1376057_at   | BG377379 | --- | --- | 0.610 | 0.480 | 0.344 | 0.000 | 0.628 | 0.027 | 0.557 | 0.034 |
| 1391195_at   | BF401728 | --- | --- | 1.114 | 0.480 | 2.912 | 0.011 | 1.139 | 0.618 | 1.840 | 0.032 |
| 1394866_at   | AI511410 | --- | --- | 0.764 | 0.482 | 0.512 | 0.080 | 0.787 | 0.539 | 0.635 | 0.195 |
| 1378938_at   | AI175561 | --- | --- | 1.126 | 0.482 | 1.307 | 0.584 | 0.908 | 0.688 | 1.608 | 0.620 |
| 1382971_at   | BF389407 | --- | --- | 1.086 | 0.483 | 0.741 | 0.151 | 1.055 | 0.108 | 0.638 | 0.016 |
| 1394759_at   | BF289157 | --- | --- | 0.920 | 0.484 | 0.934 | 0.057 | 0.738 | 0.291 | 0.881 | 0.043 |
| 1377262_at   | BI291600 | --- | --- | 1.274 | 0.484 | 0.597 | 0.409 | 0.842 | 0.442 | 0.790 | 0.199 |
| 1370988_at   | BE349751 | --- | --- | 1.360 | 0.485 | 1.474 | 0.226 | 1.369 | 0.093 | 1.138 | 0.222 |
| 1389564_at   | AA892159 | --- | --- | 1.227 | 0.485 | 1.447 | 0.004 | 1.360 | 0.395 | 1.208 | 0.012 |
| 1397466_at   | BI292573 | --- | --- | 1.020 | 0.485 | 1.145 | 0.727 | 0.409 | 0.343 | 0.984 | 0.922 |
| 1395630_at   | BF413510 | --- | --- | 1.193 | 0.486 | 0.970 | 0.824 | 1.082 | 0.697 | 1.061 | 0.897 |
| 1390258_at   | AA893505 | --- | --- | 1.019 | 0.487 | 0.763 | 0.653 | 1.223 | 0.048 | 0.632 | 0.449 |
| 1384237_at   | BF420822 | --- | --- | 0.871 | 0.488 | 1.265 | 0.149 | 0.573 | 0.617 | 1.565 | 0.010 |
| 1389082_at   | BF398612 | --- | --- | 1.001 | 0.491 | 0.447 | 0.017 | 0.703 | 0.285 | 0.588 | 0.083 |
| 1376748_at   | AI406684 | --- | --- | 0.755 | 0.492 | 0.453 | 0.043 | 0.892 | 0.486 | 0.731 | 0.027 |
| 1374272_at   | BI280268 | --- | --- | 0.775 | 0.493 | 0.662 | 0.178 | 0.822 | 0.901 | 0.808 | 0.213 |
| 1374657_at   | AA848437 | --- | --- | 0.765 | 0.493 | 1.659 | 0.110 | 1.139 | 0.220 | 1.586 | 0.059 |
| 1393238_at   | AA900649 | --- | --- | 0.924 | 0.498 | 0.605 | 0.485 | 0.637 | 0.007 | 0.718 | 0.241 |
| 1398979_at   | BF405079 | --- | --- | 1.121 | 0.499 | 1.728 | 0.079 | 0.737 | 0.038 | 1.349 | 0.967 |
| 1392505_at   | AI232232 | --- | --- | 1.293 | 0.500 | 2.457 | 0.075 | 0.921 | 0.256 | 1.901 | 0.040 |
| 1393037_at   | BG373089 | --- | --- | 1.234 | 0.502 | 0.601 | 0.036 | 1.033 | 0.864 | 0.449 | 0.060 |
| 1383592_at   | AA925988 | --- | --- | 1.142 | 0.504 | 3.861 | 0.001 | 0.983 | 0.669 | 2.847 | 0.000 |
| 1373738_at   | BG379494 | --- | --- | 0.509 | 0.504 | 1.541 | 0.050 | 0.550 | 0.048 | 0.962 | 0.220 |
| 1384176_at   | BF419876 | --- | --- | 1.080 | 0.506 | 0.892 | 0.450 | 1.111 | 0.038 | 0.865 | 0.951 |
| 1374040_at   | BI286772 | --- | --- | 0.899 | 0.506 | 0.999 | 0.431 | 0.966 | 0.854 | 1.122 | 0.855 |
| 1383942_at   | BI275795 | --- | --- | 0.599 | 0.506 | 1.868 | 0.011 | 0.986 | 0.219 | 1.728 | 0.005 |
| 1377720_x_at | AA892765 | --- | --- | 0.824 | 0.508 | 0.663 | 0.019 | 0.953 | 0.806 | 0.788 | 0.323 |
| 1376339_at   | BM385270 | --- | --- | 0.822 | 0.509 | 0.800 | 0.841 | 0.583 | 0.018 | 0.735 | 0.113 |
| 1385556_at   | AW521143 | --- | --- | 0.874 | 0.511 | 0.799 | 0.060 | 0.910 | 0.581 | 0.677 | 0.085 |
| 1392736_at   | AW532939 | --- | --- | 1.313 | 0.512 | 1.503 | 0.901 | 1.227 | 0.276 | 1.143 | 0.179 |
| 1372925_at   | AI233135 | --- | --- | 0.756 | 0.513 | 1.034 | 0.806 | 1.204 | 0.466 | 1.187 | 0.340 |
| 1378905_at   | BF557456 | --- | --- | 0.939 | 0.514 | 0.857 | 0.294 | 1.070 | 0.529 | 0.743 | 0.208 |
| 1384200_at   | BE107328 | --- | --- | 0.950 | 0.515 | 2.897 | 0.000 | 0.675 | 0.009 | 2.434 | 0.004 |
| 1383161_a_at | AI008646 | --- | --- | 0.856 | 0.515 | 0.889 | 0.220 | 0.989 | 0.950 | 0.990 | 0.331 |
| 1372508_at   | BE113266 | --- | --- | 1.179 | 0.521 | 0.487 | 0.006 | 1.284 | 0.980 | 0.655 | 0.009 |
| 1389695_at   | AI410976 | --- | --- | 1.176 | 0.524 | 0.919 | 0.547 | 0.748 | 0.043 | 0.599 | 0.039 |
| 1392905_at   | BF552733 | --- | --- | 0.662 | 0.529 | 0.718 | 0.050 | 0.561 | 0.028 | 0.405 | 0.017 |
| 1376649_at   | AI111965 | --- | --- | 0.787 | 0.529 | 0.968 | 0.942 | 0.762 | 0.035 | 0.944 | 0.984 |
| 1376563_at   | BG375165 | --- | --- | 0.629 | 0.529 | 1.939 | 0.347 | 0.908 | 0.201 | 1.587 | 0.578 |
| 1375360_at   | BE099437 | --- | --- | 0.751 | 0.530 | 1.379 | 0.207 | 0.600 | 0.199 | 1.022 | 0.634 |
| 1374293_at   | AI137495 | --- | --- | 0.802 | 0.532 | 1.745 | 0.192 | 0.896 | 0.101 | 1.891 | 0.081 |
| 1392865_at   | BG371594 | --- | --- | 0.797 | 0.532 | 0.998 | 0.800 | 1.306 | 0.190 | 0.799 | 0.991 |
| 1388441_at   | BG379987 | --- | --- | 0.697 | 0.533 | 0.783 | 0.081 | 0.636 | 0.022 | 0.790 | 0.599 |
| 1379745_at   | AI102041 | --- | --- | 0.857 | 0.533 | 1.496 | 0.169 | 1.023 | 0.729 | 1.540 | 0.108 |
| 1375045_at   | BM387520 | --- | --- | 1.607 | 0.534 | 1.839 | 0.005 | 1.561 | 0.016 | 1.333 | 0.024 |
| 1392753_at   | AA875468 | --- | --- | 0.921 | 0.534 | 0.669 | 0.019 | 0.873 | 0.272 | 1.253 | 0.348 |
| 1394304_at   | BF556357 | --- | --- | 1.136 | 0.535 | 0.476 | 0.002 | 1.139 | 0.731 | 0.559 | 0.012 |
| 1380486_at   | BM383047 | --- | --- | 0.875 | 0.536 | 0.460 | 0.031 | 1.070 | 0.930 | 0.622 | 0.032 |
| 1383994_at   | BI289342 | --- | --- | 0.922 | 0.537 | 0.752 | 0.372 | 1.118 | 0.861 | 0.985 | 0.696 |
| 1373876_at   | BI295945 | --- | --- | 0.440 | 0.538 | 1.293 | 0.099 | 0.791 | 0.331 | 1.318 | 0.085 |
| 1393307_at   | AI136599 | --- | --- | 1.013 | 0.539 | 1.155 | 0.734 | 1.014 | 0.767 | 1.112 | 0.416 |
| 1394268_at   | BF564783 | --- | --- | 1.079 | 0.543 | 0.999 | 0.080 | 1.055 | 0.523 | 1.219 | 0.006 |
| 1378033_at   | AI029178 | --- | --- | 1.853 | 0.547 | 1.380 | 0.138 | 2.650 | 0.049 | 0.570 | 0.009 |
| 1375339_at   | BI296679 | --- | --- | 1.249 | 0.548 | 1.068 | 0.098 | 0.973 | 0.488 | 0.713 | 0.070 |
| 1380219_at   | BE117902 | --- | --- | 1.049 | 0.548 | 1.700 | 0.014 | 1.061 | 0.116 | 1.840 | 0.045 |
| 1396436_at   | BF406417 | --- | --- | 1.120 | 0.549 | 0.809 | 0.308 | 2.870 | 0.060 | 0.970 | 0.312 |

|              |          |     |     |       |       |       |       |       |       |       |       |
|--------------|----------|-----|-----|-------|-------|-------|-------|-------|-------|-------|-------|
| 1376723_at   | AW142765 | --- | --- | 0.886 | 0.550 | 2.683 | 0.009 | 0.918 | 0.503 | 1.549 | 0.070 |
| 1397788_at   | AW521711 | --- | --- | 0.819 | 0.550 | 0.389 | 0.001 | 0.693 | 0.233 | 0.559 | 0.064 |
| 1392767_at   | AI502349 | --- | --- | 1.517 | 0.551 | 1.144 | 0.206 | 1.119 | 0.412 | 0.934 | 0.187 |
| 1372474_at   | AI172184 | --- | --- | 0.943 | 0.552 | 1.048 | 0.959 | 0.740 | 0.011 | 1.035 | 0.461 |
| 1385595_at   | BE114414 | --- | --- | 0.762 | 0.553 | 1.029 | 0.521 | 0.371 | 0.008 | 1.064 | 0.738 |
| 1393283_at   | AA924915 | --- | --- | 1.215 | 0.553 | 1.044 | 0.999 | 1.180 | 0.095 | 1.020 | 0.600 |
| 1382547_at   | AA859744 | --- | --- | 1.089 | 0.553 | 1.244 | 1.000 | 1.684 | 0.129 | 1.241 | 0.983 |
| 1375345_at   | AW919569 | --- | --- | 0.528 | 0.555 | 0.604 | 0.076 | 0.500 | 0.005 | 0.736 | 0.061 |
| 1372623_at   | BE101435 | --- | --- | 0.655 | 0.562 | 1.391 | 0.230 | 0.679 | 0.038 | 1.066 | 0.285 |
| 1381448_at   | AW535305 | --- | --- | 0.930 | 0.565 | 1.470 | 0.818 | 1.570 | 0.292 | 1.559 | 0.840 |
| 1372718_at   | AA799572 | --- | --- | 0.753 | 0.566 | 0.992 | 0.950 | 0.611 | 0.033 | 0.848 | 0.092 |
| 1372445_at   | AI171783 | --- | --- | 0.714 | 0.568 | 1.000 | 0.600 | 0.759 | 0.631 | 0.797 | 0.313 |
| 1380202_at   | AI070003 | --- | --- | 0.634 | 0.569 | 0.485 | 0.042 | 1.000 | 0.317 | 1.072 | 0.156 |
| 1384724_at   | AA850766 | --- | --- | 1.195 | 0.569 | 0.981 | 0.794 | 1.005 | 0.374 | 0.983 | 0.857 |
| 1382500_at   | BF408533 | --- | --- | 0.980 | 0.570 | 1.430 | 0.066 | 0.855 | 0.182 | 1.289 | 0.021 |
| 1397917_at   | BF412498 | --- | --- | 0.879 | 0.571 | 0.773 | 0.359 | 0.885 | 0.598 | 1.787 | 0.017 |
| 1373402_at   | AA848980 | --- | --- | 1.105 | 0.573 | 1.114 | 0.577 | 0.987 | 0.056 | 0.953 | 0.640 |
| 1395962_at   | BI278960 | --- | --- | 0.908 | 0.574 | 0.576 | 0.288 | 0.624 | 0.060 | 0.547 | 0.108 |
| 1378249_x_at | BE110241 | --- | --- | 0.961 | 0.575 | 1.021 | 0.275 | 1.243 | 0.060 | 1.198 | 0.292 |
| 1386662_at   | BF553981 | --- | --- | 1.233 | 0.575 | 2.175 | 0.081 | 1.013 | 0.411 | 1.193 | 0.272 |
| 1397097_x_at | BI285806 | --- | --- | 0.918 | 0.578 | 0.761 | 0.048 | 1.036 | 0.834 | 0.749 | 0.132 |
| 1395721_at   | AW917486 | --- | --- | 0.435 | 0.579 | 0.161 | 0.004 | 0.421 | 0.404 | 0.192 | 0.000 |
| 1367538_at   | BF284303 | --- | --- | 0.955 | 0.579 | 0.655 | 0.003 | 1.257 | 0.169 | 0.642 | 0.000 |
| 1389242_at   | BG377726 | --- | --- | 1.051 | 0.580 | 0.386 | 0.003 | 0.813 | 0.095 | 0.510 | 0.007 |
| 1381175_at   | BE114469 | --- | --- | 1.130 | 0.582 | 1.577 | 0.024 | 1.115 | 0.300 | 0.920 | 0.403 |
| 1391625_at   | AI706673 | --- | --- | 0.878 | 0.582 | 0.989 | 0.980 | 0.659 | 0.233 | 0.572 | 0.051 |
| 1397845_at   | BE106909 | --- | --- | 1.230 | 0.584 | 0.976 | 0.465 | 0.933 | 0.317 | 1.472 | 0.070 |
| 1375651_at   | AI230164 | --- | --- | 1.011 | 0.586 | 0.836 | 0.090 | 1.077 | 0.205 | 0.874 | 0.149 |
| 1388361_at   | BI303856 | --- | --- | 0.499 | 0.588 | 0.892 | 0.449 | 0.338 | 0.104 | 0.656 | 0.342 |
| 1374014_at   | AI410079 | --- | --- | 1.099 | 0.589 | 0.750 | 0.636 | 1.159 | 0.343 | 1.685 | 0.016 |
| 1378849_at   | BF414619 | --- | --- | 0.803 | 0.590 | 0.605 | 0.034 | 0.722 | 0.241 | 0.524 | 0.128 |
| 1375940_a_at | BF396656 | --- | --- | 1.226 | 0.590 | 0.432 | 0.001 | 1.286 | 0.245 | 0.582 | 0.003 |
| 1375238_at   | BM385814 | --- | --- | 1.069 | 0.594 | 1.022 | 0.885 | 0.796 | 0.024 | 0.932 | 0.718 |
| 1391709_at   | BE108699 | --- | --- | 1.009 | 0.595 | 0.337 | 0.075 | 0.981 | 0.759 | 0.334 | 0.060 |
| 1396136_at   | BF386241 | --- | --- | 1.118 | 0.597 | 1.149 | 0.996 | 0.843 | 0.963 | 1.001 | 0.033 |
| 1391376_at   | BF405737 | --- | --- | 1.024 | 0.598 | 0.914 | 0.581 | 1.014 | 0.976 | 0.836 | 0.414 |
| 1371933_at   | AI228039 | --- | --- | 1.071 | 0.598 | 0.494 | 0.026 | 1.248 | 0.116 | 0.371 | 0.015 |
| 1378846_at   | BF387240 | --- | --- | 1.178 | 0.602 | 0.994 | 0.282 | 1.001 | 0.998 | 1.000 | 0.923 |
| 1377833_at   | BF396950 | --- | --- | 0.804 | 0.603 | 1.076 | 0.228 | 0.832 | 0.980 | 1.556 | 0.015 |
| 1367489_at   | BE114147 | --- | --- | 0.912 | 0.603 | 0.857 | 0.350 | 0.745 | 0.511 | 1.026 | 0.755 |
| 1389101_at   | BE120340 | --- | --- | 0.899 | 0.604 | 1.331 | 0.007 | 0.806 | 0.337 | 1.617 | 0.008 |
| 1374447_at   | BG672082 | --- | --- | 1.034 | 0.604 | 1.235 | 0.030 | 0.936 | 0.355 | 1.133 | 0.424 |
| 1395456_at   | AW919228 | --- | --- | 0.882 | 0.607 | 0.363 | 0.002 | 1.278 | 0.146 | 0.561 | 0.207 |
| 1399004_at   | BM986309 | --- | --- | 0.887 | 0.607 | 1.027 | 0.464 | 0.911 | 0.601 | 0.952 | 0.667 |
| 1379338_at   | AI044115 | --- | --- | 0.959 | 0.608 | 2.362 | 0.001 | 1.574 | 0.206 | 1.508 | 0.123 |
| 1376935_at   | BE113667 | --- | --- | 1.023 | 0.610 | 4.712 | 0.003 | 0.942 | 0.227 | 3.346 | 0.001 |
| 1389238_at   | BG376577 | --- | --- | 1.128 | 0.610 | 3.269 | 0.011 | 1.392 | 0.311 | 1.922 | 0.030 |
| 1394837_at   | BF405797 | --- | --- | 1.680 | 0.611 | 0.663 | 0.211 | 2.021 | 0.143 | 0.663 | 0.117 |
| 1373692_at   | BM391907 | --- | --- | 1.064 | 0.611 | 1.218 | 0.034 | 0.972 | 0.817 | 1.077 | 0.306 |
| 1383401_at   | BI288769 | --- | --- | 0.827 | 0.613 | 1.016 | 0.931 | 0.933 | 0.701 | 0.943 | 0.851 |
| 1372545_at   | AI411021 | --- | --- | 0.955 | 0.618 | 0.679 | 0.038 | 0.842 | 0.197 | 0.776 | 0.075 |
| 1385343_at   | AW523620 | --- | --- | 1.944 | 0.618 | 2.084 | 0.600 | 1.042 | 0.746 | 1.091 | 0.894 |
| 1375821_at   | BF390754 | --- | --- | 1.007 | 0.618 | 2.431 | 0.064 | 1.765 | 0.793 | 1.162 | 0.675 |
| 1395914_at   | AA684862 | --- | --- | 1.207 | 0.622 | 0.473 | 0.175 | 0.925 | 0.367 | 0.352 | 0.008 |
| 1372173_at   | AI407945 | --- | --- | 0.870 | 0.623 | 0.996 | 0.843 | 0.916 | 0.863 | 1.060 | 0.484 |
| 1377861_at   | AI011151 | --- | --- | 0.704 | 0.623 | 0.386 | 0.002 | 1.181 | 0.036 | 0.473 | 0.009 |
| 1396301_x_at | BI277442 | --- | --- | 0.994 | 0.626 | 0.740 | 0.352 | 2.095 | 0.191 | 0.678 | 0.482 |
| 1371512_at   | AA818692 | --- | --- | 0.806 | 0.627 | 0.907 | 0.098 | 0.700 | 0.041 | 0.837 | 0.502 |
| 1379141_at   | BF402028 | --- | --- | 1.455 | 0.627 | 1.453 | 0.032 | 1.298 | 0.380 | 1.158 | 0.932 |
| 1373355_at   | BI299014 | --- | --- | 1.058 | 0.628 | 1.708 | 0.072 | 1.079 | 0.410 | 1.403 | 0.064 |
| 1376240_at   | BG378240 | --- | --- | 1.235 | 0.628 | 2.024 | 0.014 | 1.121 | 0.555 | 1.846 | 0.006 |

|              |           |     |     |       |       |       |       |       |       |       |       |
|--------------|-----------|-----|-----|-------|-------|-------|-------|-------|-------|-------|-------|
| 1398950_at   | BI275914  | --- | --- | 0.888 | 0.631 | 0.607 | 0.029 | 0.697 | 0.119 | 0.770 | 0.143 |
| 1376489_at   | BF397919  | --- | --- | 1.078 | 0.631 | 1.332 | 0.033 | 0.911 | 0.442 | 1.044 | 0.611 |
| 1392702_at   | BM387858  | --- | --- | 1.038 | 0.631 | 1.059 | 0.585 | 1.020 | 0.038 | 1.081 | 0.369 |
| 1372550_at   | AI169278  | --- | --- | 1.086 | 0.633 | 2.227 | 0.000 | 0.840 | 0.073 | 1.724 | 0.019 |
| 1395869_at   | BI296231  | --- | --- | 1.019 | 0.633 | 1.006 | 0.176 | 1.283 | 0.151 | 1.100 | 0.688 |
| 1399010_at   | BG381740  | --- | --- | 0.926 | 0.633 | 1.488 | 0.016 | 0.806 | 0.019 | 1.659 | 0.005 |
| 1394815_at   | BE107436  | --- | --- | 1.058 | 0.634 | 0.866 | 0.141 | 1.462 | 0.087 | 0.958 | 0.301 |
| 1387345_at   | NM_023986 | --- | --- | 0.569 | 0.634 | 0.526 | 0.016 | 0.592 | 0.045 | 0.549 | 0.002 |
| 1379705_at   | AI511060  | --- | --- | 1.173 | 0.635 | 0.806 | 0.247 | 1.464 | 0.273 | 0.723 | 0.238 |
| 1381905_at   | AI230826  | --- | --- | 0.521 | 0.638 | 0.285 | 0.024 | 0.494 | 0.047 | 0.217 | 0.014 |
| 1391286_at   | AA818116  | --- | --- | 0.934 | 0.638 | 1.938 | 0.011 | 1.065 | 0.979 | 1.484 | 0.073 |
| 1399106_at   | AI176121  | --- | --- | 0.804 | 0.642 | 0.950 | 0.281 | 0.749 | 0.018 | 0.785 | 0.388 |
| 1398690_at   | BF284365  | --- | --- | 1.772 | 0.646 | 0.420 | 0.022 | 0.853 | 0.624 | 0.514 | 0.012 |
| 1374456_at   | AI179562  | --- | --- | 0.893 | 0.646 | 1.032 | 0.544 | 1.142 | 0.298 | 0.940 | 0.644 |
| 1378930_a_at | BG371548  | --- | --- | 1.180 | 0.647 | 0.831 | 0.744 | 1.247 | 0.678 | 0.508 | 0.202 |
| 1373930_at   | BM388963  | --- | --- | 1.222 | 0.652 | 0.986 | 0.492 | 1.247 | 0.602 | 1.105 | 0.273 |
| 1371680_at   | BI303631  | --- | --- | 0.829 | 0.653 | 1.187 | 0.092 | 0.606 | 0.004 | 1.031 | 0.620 |
| 1396213_at   | BF547413  | --- | --- | 0.637 | 0.656 | 0.900 | 0.289 | 0.625 | 0.558 | 0.370 | 0.023 |
| 1382220_at   | AI180454  | --- | --- | 1.400 | 0.657 | 1.184 | 0.989 | 1.815 | 0.025 | 0.922 | 0.249 |
| 1389978_at   | BF396079  | --- | --- | 1.011 | 0.657 | 0.466 | 0.044 | 1.715 | 0.164 | 0.438 | 0.059 |
| 1383162_at   | AI008646  | --- | --- | 0.932 | 0.658 | 1.178 | 0.677 | 1.078 | 0.506 | 1.212 | 0.293 |
| 1391663_at   | AI511259  | --- | --- | 0.682 | 0.660 | 1.098 | 0.293 | 0.523 | 0.407 | 0.946 | 0.608 |
| 1384222_at   | BG669046  | --- | --- | 0.924 | 0.661 | 0.694 | 0.003 | 1.106 | 0.786 | 0.647 | 0.021 |
| 1371428_at   | AI170002  | --- | --- | 0.916 | 0.661 | 0.992 | 0.914 | 0.938 | 0.179 | 0.985 | 0.732 |
| 1372397_at   | BE349744  | --- | --- | 1.160 | 0.664 | 1.438 | 0.011 | 0.978 | 0.452 | 1.265 | 0.025 |
| 1395208_at   | AW526049  | --- | --- | 0.999 | 0.664 | 1.130 | 0.489 | 0.968 | 0.749 | 1.058 | 0.729 |
| 1382853_at   | AW915066  | --- | --- | 1.131 | 0.665 | 1.247 | 0.079 | 0.613 | 0.047 | 1.020 | 0.931 |
| 1396300_at   | BI277442  | --- | --- | 0.818 | 0.666 | 1.613 | 0.572 | 1.384 | 0.329 | 0.998 | 0.750 |
| 1379335_at   | AI639045  | --- | --- | 0.780 | 0.666 | 0.533 | 0.007 | 1.184 | 0.419 | 0.810 | 0.120 |
| 1392877_at   | AA859524  | --- | --- | 1.158 | 0.668 | 0.154 | 0.010 | 1.482 | 0.244 | 0.549 | 0.001 |
| 1384585_at   | BI279337  | --- | --- | 1.009 | 0.668 | 0.614 | 0.020 | 1.291 | 0.133 | 0.640 | 0.035 |
| 1395132_at   | BE115432  | --- | --- | 1.240 | 0.668 | 0.820 | 0.215 | 1.016 | 0.283 | 0.321 | 0.007 |
| 1367475_at   | AI227695  | --- | --- | 0.955 | 0.669 | 1.108 | 0.422 | 0.968 | 0.527 | 1.095 | 0.138 |
| 1378573_at   | BE109768  | --- | --- | 1.406 | 0.669 | 1.039 | 0.965 | 1.536 | 0.307 | 0.800 | 0.729 |
| 1376488_at   | AI101689  | --- | --- | 0.881 | 0.670 | 0.611 | 0.025 | 0.849 | 0.451 | 0.666 | 0.019 |
| 1389184_at   | AA818914  | --- | --- | 1.006 | 0.670 | 1.351 | 0.271 | 0.945 | 0.600 | 1.284 | 0.991 |
| 1397534_at   | AW918914  | --- | --- | 1.308 | 0.671 | 1.155 | 0.333 | 0.949 | 0.540 | 1.867 | 0.826 |
| 1375595_at   | AI231433  | --- | --- | 1.300 | 0.675 | 4.556 | 0.004 | 1.188 | 0.763 | 3.550 | 0.013 |
| 1377910_at   | BF407333  | --- | --- | 0.905 | 0.676 | 1.474 | 0.018 | 0.872 | 0.470 | 1.010 | 0.097 |
| 1377013_at   | AI639108  | --- | --- | 0.772 | 0.678 | 0.070 | 0.007 | 1.078 | 0.026 | 0.125 | 0.044 |
| 1394477_at   | BG380672  | --- | --- | 1.044 | 0.679 | 0.945 | 0.060 | 0.969 | 0.693 | 0.968 | 0.756 |
| 1382429_at   | AI059574  | --- | --- | 1.088 | 0.679 | 0.850 | 0.191 | 1.011 | 0.699 | 0.717 | 0.043 |
| 1393715_s_at | BG376382  | --- | --- | 0.479 | 0.679 | 1.157 | 0.133 | 0.554 | 0.275 | 1.242 | 0.578 |
| 1372291_at   | BI274517  | --- | --- | 0.668 | 0.685 | 0.944 | 0.993 | 0.419 | 0.008 | 0.946 | 0.611 |
| 1378954_at   | AI711116  | --- | --- | 0.892 | 0.686 | 0.974 | 0.973 | 0.838 | 0.428 | 0.885 | 0.553 |
| 1389046_at   | AA860015  | --- | --- | 1.021 | 0.686 | 1.035 | 0.482 | 1.022 | 0.911 | 1.015 | 0.030 |
| 1375952_at   | AI178495  | --- | --- | 0.987 | 0.686 | 0.993 | 0.974 | 1.056 | 0.579 | 0.690 | 0.124 |
| 1375107_at   | AI170758  | --- | --- | 0.959 | 0.688 | 0.814 | 0.049 | 1.002 | 0.704 | 0.856 | 0.035 |
| 1395945_at   | AW535178  | --- | --- | 1.123 | 0.688 | 1.012 | 0.784 | 1.187 | 0.494 | 0.943 | 0.328 |
| 1394623_at   | AA851041  | --- | --- | 1.043 | 0.690 | 1.123 | 0.718 | 0.973 | 0.935 | 0.937 | 0.931 |
| 1379574_at   | AI575248  | --- | --- | 1.330 | 0.690 | 0.930 | 0.856 | 0.681 | 0.544 | 0.892 | 0.440 |
| 1380301_at   | BM385833  | --- | --- | 0.935 | 0.692 | 0.852 | 0.632 | 0.981 | 0.950 | 1.115 | 0.778 |
| 1385634_at   | AA817959  | --- | --- | 0.968 | 0.692 | 1.823 | 0.080 | 0.831 | 0.297 | 1.972 | 0.018 |
| 1371693_at   | AA849757  | --- | --- | 0.918 | 0.694 | 1.642 | 0.051 | 1.025 | 0.909 | 1.793 | 0.053 |
| 1396123_at   | BG377335  | --- | --- | 1.057 | 0.695 | 0.675 | 0.015 | 1.039 | 0.768 | 1.000 | 0.301 |
| 1395303_at   | BF397734  | --- | --- | 1.254 | 0.696 | 1.128 | 0.352 | 1.397 | 0.064 | 0.903 | 0.205 |
| 1383195_at   | AW521311  | --- | --- | 1.135 | 0.698 | 1.286 | 0.483 | 0.713 | 0.960 | 1.617 | 0.831 |
| 1397337_at   | BE119980  | --- | --- | 0.904 | 0.698 | 0.991 | 0.859 | 0.907 | 0.676 | 1.000 | 0.888 |
| 1389173_at   | AI411575  | --- | --- | 0.668 | 0.698 | 0.496 | 0.062 | 1.465 | 0.082 | 1.122 | 0.570 |
| 1376983_at   | BF417687  | --- | --- | 2.663 | 0.699 | 1.687 | 0.088 | 2.391 | 0.179 | 3.304 | 0.010 |
| 1390563_at   | BE096678  | --- | --- | 1.156 | 0.703 | 0.868 | 0.026 | 1.052 | 0.536 | 0.762 | 0.031 |

|              |          |     |     |       |       |       |       |       |       |       |       |
|--------------|----------|-----|-----|-------|-------|-------|-------|-------|-------|-------|-------|
| 1372998_at   | BG381555 | --- | --- | 0.960 | 0.705 | 0.889 | 0.970 | 1.096 | 0.527 | 0.851 | 0.596 |
| 1397870_at   | BF390925 | --- | --- | 0.992 | 0.706 | 0.577 | 0.039 | 0.988 | 0.886 | 1.365 | 0.714 |
| 1392546_at   | AI145332 | --- | --- | 0.834 | 0.706 | 0.724 | 0.059 | 0.953 | 0.745 | 0.852 | 0.102 |
| 1382624_at   | AA858768 | --- | --- | 1.152 | 0.711 | 1.103 | 0.274 | 1.135 | 0.475 | 0.744 | 0.297 |
| 1392283_at   | BI288834 | --- | --- | 0.887 | 0.712 | 1.939 | 0.669 | 1.054 | 0.876 | 1.926 | 0.792 |
| 1374608_at   | BF415553 | --- | --- | 1.342 | 0.712 | 2.101 | 0.009 | 0.846 | 0.156 | 1.534 | 0.064 |
| 1391751_at   | BE107919 | --- | --- | 1.142 | 0.713 | 1.186 | 0.456 | 1.366 | 0.140 | 1.053 | 0.461 |
| 1391466_at   | AI170347 | --- | --- | 0.654 | 0.714 | 1.714 | 0.091 | 0.662 | 0.427 | 1.254 | 0.127 |
| 1389611_at   | AA849857 | --- | --- | 0.754 | 0.715 | 2.393 | 0.001 | 0.339 | 0.053 | 2.283 | 0.001 |
| 1379749_at   | AI230509 | --- | --- | 1.191 | 0.717 | 1.103 | 0.957 | 0.995 | 0.964 | 1.093 | 0.452 |
| 1372311_at   | BG380795 | --- | --- | 0.578 | 0.719 | 1.305 | 0.673 | 0.452 | 0.273 | 1.115 | 0.550 |
| 1388308_at   | AA800576 | --- | --- | 0.758 | 0.720 | 1.091 | 0.978 | 0.651 | 0.041 | 0.900 | 0.282 |
| 1389956_a_at | AI180257 | --- | --- | 1.120 | 0.720 | 0.922 | 0.221 | 1.054 | 0.375 | 0.906 | 0.389 |
| 1398527_at   | BE108292 | --- | --- | 1.084 | 0.720 | 0.933 | 0.312 | 1.295 | 0.076 | 1.079 | 0.402 |
| 1395662_at   | AW531934 | --- | --- | 1.025 | 0.720 | 1.135 | 0.047 | 1.019 | 0.877 | 1.136 | 0.353 |
| 1381341_at   | BE111796 | --- | --- | 1.482 | 0.720 | 2.215 | 0.081 | 1.143 | 0.408 | 1.406 | 0.357 |
| 1395772_at   | BF290181 | --- | --- | 0.871 | 0.720 | 1.217 | 0.287 | 0.856 | 0.622 | 1.269 | 0.639 |
| 1397343_at   | BE113258 | --- | --- | 1.411 | 0.721 | 1.160 | 0.031 | 1.125 | 0.594 | 1.257 | 0.041 |
| 1384100_at   | AI043947 | --- | --- | 0.980 | 0.722 | 1.081 | 0.887 | 1.020 | 0.981 | 0.928 | 0.547 |
| 1373667_at   | BF400674 | --- | --- | 0.938 | 0.722 | 0.563 | 0.001 | 0.709 | 0.160 | 0.672 | 0.215 |
| 1379405_at   | AI235642 | --- | --- | 0.892 | 0.723 | 0.514 | 0.065 | 0.797 | 0.728 | 0.647 | 0.034 |
| 1381898_at   | AI576907 | --- | --- | 1.001 | 0.724 | 1.197 | 0.334 | 0.999 | 0.989 | 1.241 | 0.360 |
| 1396192_at   | H31517   | --- | --- | 1.044 | 0.725 | 2.081 | 0.116 | 0.979 | 0.928 | 1.773 | 0.457 |
| 1395044_at   | AI179766 | --- | --- | 0.853 | 0.727 | 0.981 | 0.618 | 0.933 | 0.676 | 0.760 | 0.158 |
| 1377716_at   | BE116101 | --- | --- | 1.259 | 0.728 | 1.130 | 0.728 | 1.454 | 0.028 | 1.132 | 0.761 |
| 1396228_at   | BG380184 | --- | --- | 1.034 | 0.733 | 3.078 | 0.001 | 0.884 | 0.036 | 2.327 | 0.004 |
| 1398997_at   | AI102252 | --- | --- | 0.932 | 0.734 | 1.383 | 0.352 | 0.651 | 0.140 | 1.553 | 0.039 |
| 1372078_at   | AA891681 | --- | --- | 0.832 | 0.735 | 1.076 | 0.387 | 1.060 | 0.158 | 1.005 | 0.548 |
| 1391315_at   | BM386843 | --- | --- | 0.917 | 0.735 | 4.468 | 0.025 | 0.805 | 0.449 | 2.977 | 0.050 |
| 1395446_at   | AW916813 | --- | --- | 2.527 | 0.735 | 2.404 | 0.261 | 2.101 | 0.059 | 1.970 | 0.976 |
| 1383589_at   | BE103947 | --- | --- | 1.302 | 0.735 | 1.452 | 0.158 | 2.222 | 0.005 | 1.759 | 0.002 |
| 1372046_at   | BG378725 | --- | --- | 0.848 | 0.735 | 0.610 | 0.045 | 0.692 | 0.038 | 0.727 | 0.085 |
| 1372181_at   | BM392229 | --- | --- | 0.869 | 0.736 | 0.837 | 0.332 | 0.649 | 0.984 | 0.941 | 0.757 |
| 1388345_at   | AI599882 | --- | --- | 1.116 | 0.736 | 1.459 | 0.006 | 1.045 | 0.803 | 1.334 | 0.010 |
| 1384087_at   | AA925049 | --- | --- | 0.701 | 0.737 | 3.696 | 0.000 | 1.224 | 0.738 | 3.638 | 0.001 |
| 1381969_at   | AA998296 | --- | --- | 1.308 | 0.737 | 1.605 | 0.004 | 0.931 | 0.117 | 1.265 | 0.194 |
| 1389031_at   | AI179537 | --- | --- | 0.904 | 0.737 | 1.298 | 0.370 | 0.944 | 0.870 | 1.226 | 0.356 |
| 1378019_at   | AI104278 | --- | --- | 0.662 | 0.738 | 0.648 | 0.094 | 1.045 | 0.903 | 1.003 | 0.999 |
| 1398730_at   | BF401468 | --- | --- | 1.004 | 0.739 | 1.046 | 0.988 | 1.003 | 0.897 | 1.086 | 0.722 |
| 1393587_a_at | AI578061 | --- | --- | 0.953 | 0.740 | 1.071 | 0.149 | 1.064 | 0.482 | 0.819 | 0.296 |
| 1380689_at   | BM389555 | --- | --- | 1.200 | 0.742 | 1.544 | 0.803 | 1.412 | 0.259 | 1.077 | 0.455 |
| 1392134_x_at | BE099652 | --- | --- | 1.062 | 0.744 | 1.609 | 0.136 | 1.003 | 0.999 | 1.628 | 0.212 |
| 1395728_at   | BF290109 | --- | --- | 1.096 | 0.744 | 1.554 | 0.139 | 2.039 | 0.292 | 1.378 | 0.564 |
| 1393796_at   | BG375986 | --- | --- | 1.020 | 0.745 | 3.509 | 0.042 | 0.865 | 0.653 | 1.452 | 0.884 |
| 1392519_at   | AA998248 | --- | --- | 1.015 | 0.745 | 1.631 | 0.039 | 1.449 | 0.108 | 1.153 | 0.418 |
| 1395542_at   | BF549929 | --- | --- | 0.899 | 0.746 | 2.821 | 0.005 | 1.021 | 0.908 | 2.025 | 0.005 |
| 1389375_at   | AI232407 | --- | --- | 1.016 | 0.748 | 1.540 | 0.004 | 1.145 | 0.327 | 1.393 | 0.035 |
| 1374347_at   | BF412225 | --- | --- | 0.745 | 0.753 | 1.123 | 0.666 | 0.976 | 0.830 | 1.133 | 0.227 |
| 1395280_at   | AA899303 | --- | --- | 1.210 | 0.754 | 1.050 | 0.844 | 1.137 | 0.681 | 0.964 | 0.713 |
| 1386794_at   | BF544968 | --- | --- | 1.393 | 0.755 | 1.080 | 0.611 | 1.006 | 0.802 | 0.911 | 0.751 |
| 1392735_at   | AI229265 | --- | --- | 1.390 | 0.755 | 1.079 | 0.712 | 1.283 | 0.508 | 1.402 | 0.117 |
| 1395802_at   | BF419095 | --- | --- | 0.862 | 0.757 | 0.933 | 0.792 | 0.508 | 0.206 | 0.942 | 0.643 |
| 1391926_at   | BM385008 | --- | --- | 1.146 | 0.757 | 1.263 | 0.499 | 2.721 | 0.054 | 1.326 | 0.175 |
| 1397634_at   | BE098186 | --- | --- | 0.961 | 0.757 | 0.982 | 0.866 | 1.421 | 0.873 | 0.944 | 0.177 |
| 1370524_at   | AW142720 | --- | --- | 1.031 | 0.757 | 1.031 | 0.534 | 0.906 | 0.496 | 0.956 | 0.498 |
| 1378990_at   | BI274964 | --- | --- | 0.947 | 0.757 | 0.877 | 0.052 | 0.573 | 0.220 | 1.011 | 0.482 |
| 1384151_at   | AI578392 | --- | --- | 1.204 | 0.759 | 0.997 | 0.602 | 1.111 | 0.942 | 1.433 | 0.090 |
| 1384802_at   | AI715326 | --- | --- | 0.921 | 0.759 | 0.749 | 0.353 | 1.409 | 0.064 | 0.844 | 0.052 |
| 1378283_at   | AI411185 | --- | --- | 1.244 | 0.759 | 1.116 | 0.956 | 1.119 | 0.171 | 1.053 | 0.836 |
| 1377343_at   | BF405097 | --- | --- | 0.970 | 0.759 | 0.766 | 0.246 | 1.010 | 0.896 | 0.987 | 0.926 |
| 1384938_at   | AI535143 | --- | --- | 0.999 | 0.759 | 0.924 | 0.551 | 0.986 | 0.721 | 0.700 | 0.166 |

|              |          |     |     |       |       |       |       |       |       |       |       |
|--------------|----------|-----|-----|-------|-------|-------|-------|-------|-------|-------|-------|
| 1378583_at   | BI278145 | --- | --- | 0.862 | 0.759 | 1.035 | 0.809 | 0.732 | 0.733 | 1.095 | 0.146 |
| 1377007_at   | AI409696 | --- | --- | 1.016 | 0.760 | 0.841 | 0.022 | 1.106 | 0.702 | 0.813 | 0.007 |
| 1382214_at   | AI029201 | --- | --- | 0.838 | 0.760 | 1.190 | 0.187 | 0.829 | 0.096 | 1.097 | 0.511 |
| 1385834_at   | AW532906 | --- | --- | 1.018 | 0.760 | 0.953 | 0.470 | 1.023 | 0.520 | 0.948 | 0.509 |
| 1372249_at   | BE108148 | --- | --- | 0.644 | 0.763 | 0.638 | 0.075 | 0.615 | 0.229 | 0.580 | 0.006 |
| 1376059_at   | AI716607 | --- | --- | 1.003 | 0.764 | 1.625 | 0.059 | 1.004 | 0.642 | 1.131 | 0.557 |
| 1395256_at   | BI301996 | --- | --- | 1.211 | 0.766 | 1.065 | 0.773 | 1.826 | 0.049 | 1.084 | 0.737 |
| 1383228_at   | AA875288 | --- | --- | 0.949 | 0.766 | 1.035 | 0.826 | 1.054 | 0.943 | 1.125 | 0.655 |
| 1383076_at   | AA901203 | --- | --- | 1.075 | 0.766 | 0.935 | 0.740 | 1.077 | 0.072 | 1.061 | 0.413 |
| 1379136_at   | BF410566 | --- | --- | 1.001 | 0.767 | 0.956 | 0.488 | 0.893 | 0.530 | 0.965 | 0.541 |
| 1374808_at   | BG375471 | --- | --- | 1.106 | 0.767 | 0.640 | 0.026 | 0.825 | 0.028 | 0.651 | 0.062 |
| 1378747_x_at | AI013683 | --- | --- | 1.144 | 0.768 | 0.818 | 0.113 | 1.624 | 0.067 | 1.003 | 0.156 |
| 1381640_at   | BM389537 | --- | --- | 0.881 | 0.769 | 0.536 | 0.025 | 0.924 | 0.607 | 0.589 | 0.001 |
| 1390157_at   | BI295124 | --- | --- | 1.095 | 0.769 | 1.446 | 0.018 | 1.301 | 0.846 | 1.189 | 0.159 |
| 1382763_at   | AW921300 | --- | --- | 0.906 | 0.770 | 0.898 | 0.067 | 0.578 | 0.207 | 0.884 | 0.168 |
| 1384230_at   | AI576177 | --- | --- | 0.705 | 0.770 | 0.966 | 0.424 | 0.914 | 0.690 | 0.971 | 0.355 |
| 1388498_at   | BF284014 | --- | --- | 0.889 | 0.771 | 1.319 | 0.060 | 0.823 | 0.109 | 1.148 | 0.002 |
| 1379815_at   | AI713959 | --- | --- | 1.219 | 0.772 | 1.677 | 0.972 | 2.040 | 0.101 | 1.735 | 0.322 |
| 1386511_x_at | AI231356 | --- | --- | 0.989 | 0.773 | 0.927 | 0.563 | 1.296 | 0.429 | 1.274 | 0.227 |
| 1389910_at   | BM390101 | --- | --- | 0.718 | 0.773 | 1.514 | 0.057 | 0.623 | 0.141 | 1.357 | 0.073 |
| 1388348_at   | BI278590 | --- | --- | 0.829 | 0.775 | 0.846 | 0.038 | 0.805 | 0.172 | 0.848 | 0.016 |
| 1383325_at   | AI712781 | --- | --- | 0.666 | 0.775 | 2.575 | 0.100 | 0.598 | 0.162 | 1.156 | 0.167 |
| 1392418_at   | BE105603 | --- | --- | 1.399 | 0.776 | 1.488 | 0.035 | 2.192 | 0.286 | 0.838 | 0.622 |
| 1376836_at   | BF419655 | --- | --- | 0.993 | 0.776 | 0.857 | 0.566 | 1.058 | 0.696 | 1.018 | 0.466 |
| 1374024_at   | AA893640 | --- | --- | 0.976 | 0.778 | 1.338 | 0.159 | 0.948 | 0.385 | 1.460 | 0.003 |
| 1390484_at   | AI176750 | --- | --- | 1.171 | 0.780 | 1.064 | 0.470 | 1.324 | 0.031 | 1.005 | 0.101 |
| 1378842_at   | AI102520 | --- | --- | 0.903 | 0.780 | 2.951 | 0.009 | 0.674 | 0.055 | 2.178 | 0.006 |
| 1386766_at   | BF522861 | --- | --- | 0.738 | 0.782 | 0.712 | 0.163 | 0.676 | 0.286 | 0.613 | 0.021 |
| 1391719_at   | BE098936 | --- | --- | 1.072 | 0.782 | 0.661 | 0.035 | 1.555 | 0.285 | 1.229 | 0.205 |
| 1396612_at   | BF413266 | --- | --- | 1.036 | 0.783 | 0.965 | 0.691 | 1.224 | 0.238 | 1.003 | 0.922 |
| 1396750_at   | AW528700 | --- | --- | 1.279 | 0.784 | 0.914 | 0.773 | 1.818 | 0.153 | 0.891 | 0.970 |
| 1393380_at   | AW917818 | --- | --- | 1.089 | 0.784 | 0.914 | 0.647 | 0.873 | 0.369 | 0.991 | 0.851 |
| 1397722_at   | BF419387 | --- | --- | 0.923 | 0.785 | 0.867 | 0.158 | 0.998 | 0.988 | 0.966 | 0.340 |
| 1377470_at   | AI007863 | --- | --- | 0.712 | 0.785 | 0.425 | 0.022 | 1.738 | 0.053 | 0.990 | 0.883 |
| 1377877_at   | BF397870 | --- | --- | 1.008 | 0.786 | 1.000 | 0.616 | 2.105 | 0.051 | 1.000 | 0.821 |
| 1393635_x_at | AI230430 | --- | --- | 0.765 | 0.788 | 0.983 | 0.982 | 0.999 | 0.968 | 1.437 | 0.160 |
| 1372171_at   | BE111559 | --- | --- | 0.947 | 0.790 | 1.270 | 0.467 | 0.994 | 0.982 | 1.074 | 0.634 |
| 1377342_s_at | BE105446 | --- | --- | 1.550 | 0.791 | 1.127 | 0.480 | 1.471 | 0.632 | 3.944 | 0.087 |
| 1380854_at   | BF396482 | --- | --- | 1.054 | 0.791 | 1.176 | 0.087 | 0.957 | 0.818 | 1.088 | 0.074 |
| 1396490_at   | BI296616 | --- | --- | 0.989 | 0.792 | 1.019 | 0.951 | 0.852 | 0.561 | 1.000 | 0.997 |
| 1390992_at   | BI297479 | --- | --- | 0.881 | 0.796 | 1.083 | 0.135 | 1.009 | 0.965 | 0.665 | 0.046 |
| 1398535_at   | AA998579 | --- | --- | 1.022 | 0.797 | 3.666 | 0.002 | 0.995 | 0.974 | 1.690 | 0.053 |
| 1379573_at   | AA818730 | --- | --- | 1.055 | 0.799 | 0.607 | 0.931 | 1.377 | 0.304 | 0.992 | 0.714 |
| 1388746_at   | BI297836 | --- | --- | 1.039 | 0.799 | 1.004 | 0.981 | 0.964 | 0.741 | 0.998 | 0.123 |
| 1389223_at   | AI177186 | --- | --- | 0.811 | 0.802 | 1.269 | 0.313 | 0.777 | 0.043 | 0.877 | 0.612 |
| 1383124_at   | BG672201 | --- | --- | 1.031 | 0.803 | 0.751 | 0.603 | 1.375 | 0.262 | 0.692 | 0.505 |
| 1386186_s_at | H31802   | --- | --- | 0.845 | 0.803 | 1.301 | 0.246 | 1.156 | 0.472 | 1.576 | 0.044 |
| 1373118_at   | BM387460 | --- | --- | 0.812 | 0.804 | 0.462 | 0.065 | 1.001 | 0.928 | 0.462 | 0.065 |
| 1374771_at   | BM388859 | --- | --- | 0.887 | 0.805 | 0.682 | 0.039 | 0.965 | 0.815 | 0.513 | 0.004 |
| 1380490_at   | AW434884 | --- | --- | 0.950 | 0.805 | 1.045 | 0.033 | 1.119 | 0.593 | 1.309 | 0.049 |
| 1377126_at   | BM386954 | --- | --- | 0.945 | 0.806 | 1.777 | 0.003 | 0.772 | 0.442 | 1.327 | 0.035 |
| 1377809_at   | BE111879 | --- | --- | 0.974 | 0.807 | 0.956 | 0.869 | 1.455 | 0.047 | 1.094 | 0.611 |
| 1398082_at   | BF404767 | --- | --- | 1.331 | 0.807 | 1.353 | 0.398 | 1.652 | 0.967 | 1.005 | 0.986 |
| 1398015_at   | BF404613 | --- | --- | 1.070 | 0.808 | 0.988 | 0.605 | 1.003 | 1.000 | 0.986 | 0.629 |
| 1395164_at   | AI549495 | --- | --- | 1.034 | 0.810 | 0.931 | 0.339 | 1.076 | 0.211 | 1.016 | 0.281 |
| 1389875_at   | AI227951 | --- | --- | 0.959 | 0.810 | 0.995 | 0.873 | 1.297 | 0.424 | 1.058 | 0.999 |
| 1396267_at   | N55607   | --- | --- | 1.036 | 0.810 | 1.505 | 0.247 | 0.755 | 0.992 | 1.004 | 0.037 |
| 1376606_a_at | BM387118 | --- | --- | 1.034 | 0.812 | 1.202 | 0.037 | 1.315 | 0.059 | 1.238 | 0.017 |
| 1394767_at   | BF396817 | --- | --- | 1.154 | 0.812 | 1.365 | 0.304 | 1.150 | 0.179 | 0.943 | 0.109 |
| 1370195_at   | AI408945 | --- | --- | 1.029 | 0.812 | 1.387 | 0.075 | 1.059 | 0.551 | 1.288 | 0.006 |
| 1394109_at   | BF558056 | --- | --- | 0.830 | 0.813 | 0.433 | 0.002 | 0.472 | 0.150 | 0.453 | 0.173 |

|              |          |     |     |       |       |       |       |       |       |       |       |
|--------------|----------|-----|-----|-------|-------|-------|-------|-------|-------|-------|-------|
| 1398549_at   | AI412463 | --- | --- | 1.121 | 0.813 | 1.176 | 0.324 | 1.257 | 0.829 | 0.798 | 0.775 |
| 1378697_at   | BI300550 | --- | --- | 0.914 | 0.817 | 0.999 | 0.992 | 1.398 | 0.531 | 1.037 | 0.588 |
| 1380598_at   | AI101569 | --- | --- | 1.163 | 0.818 | 2.043 | 0.019 | 0.605 | 0.046 | 1.556 | 0.061 |
| 1371396_at   | AI600035 | --- | --- | 0.700 | 0.818 | 0.776 | 0.172 | 0.626 | 0.363 | 1.029 | 0.821 |
| 1394965_at   | BE099701 | --- | --- | 1.003 | 0.819 | 3.161 | 0.060 | 1.005 | 0.884 | 0.999 | 1.000 |
| 1389340_at   | BI294227 | --- | --- | 1.096 | 0.820 | 0.929 | 0.464 | 1.486 | 0.026 | 0.687 | 0.001 |
| 1372772_at   | BM385098 | --- | --- | 0.938 | 0.822 | 1.170 | 0.458 | 1.092 | 0.444 | 0.815 | 0.098 |
| 1390587_x_at | AW525862 | --- | --- | 0.923 | 0.825 | 1.408 | 0.444 | 0.661 | 0.026 | 1.167 | 0.225 |
| 1371971_at   | AI599676 | --- | --- | 0.771 | 0.826 | 1.485 | 0.211 | 0.975 | 0.744 | 1.376 | 0.039 |
| 1377951_at   | AA964993 | --- | --- | 1.008 | 0.827 | 1.136 | 0.174 | 1.002 | 0.988 | 1.026 | 0.076 |
| 1391369_at   | BE095798 | --- | --- | 0.938 | 0.829 | 0.998 | 0.237 | 0.935 | 0.686 | 0.999 | 0.523 |
| 1375197_at   | BG665384 | --- | --- | 0.893 | 0.830 | 0.819 | 0.231 | 0.797 | 0.018 | 0.568 | 0.146 |
| 1398128_at   | AI548626 | --- | --- | 1.084 | 0.831 | 0.869 | 0.953 | 1.005 | 0.794 | 0.813 | 0.939 |
| 1389096_at   | BI274243 | --- | --- | 1.098 | 0.833 | 0.617 | 0.179 | 0.720 | 0.984 | 0.816 | 0.113 |
| 1389995_at   | BF546042 | --- | --- | 0.973 | 0.835 | 1.465 | 0.048 | 0.987 | 0.880 | 1.051 | 0.750 |
| 1393237_at   | AI577833 | --- | --- | 0.927 | 0.835 | 1.004 | 0.188 | 0.948 | 0.328 | 1.118 | 0.170 |
| 1388879_at   | BG669292 | --- | --- | 0.731 | 0.836 | 0.846 | 0.527 | 0.705 | 0.163 | 0.608 | 0.304 |
| 1394656_at   | AW528815 | --- | --- | 0.926 | 0.836 | 0.851 | 0.312 | 1.374 | 0.018 | 0.685 | 0.298 |
| 1388678_at   | AI176695 | --- | --- | 1.008 | 0.838 | 0.641 | 0.063 | 1.400 | 0.112 | 0.790 | 0.065 |
| 1383580_at   | AA859643 | --- | --- | 1.713 | 0.838 | 1.746 | 0.687 | 1.068 | 0.791 | 0.611 | 0.035 |
| 1379702_at   | AI410993 | --- | --- | 1.005 | 0.839 | 0.996 | 0.845 | 1.010 | 0.746 | 0.999 | 0.979 |
| 1388481_at   | AI407731 | --- | --- | 0.960 | 0.839 | 1.710 | 0.000 | 0.708 | 0.041 | 1.472 | 0.001 |
| 1390141_at   | BF281848 | --- | --- | 1.533 | 0.842 | 1.057 | 0.774 | 0.916 | 0.801 | 1.182 | 0.434 |
| 1385306_at   | BI288042 | --- | --- | 0.780 | 0.842 | 1.234 | 0.106 | 1.173 | 0.514 | 1.001 | 0.409 |
| 1384643_at   | AI071465 | --- | --- | 0.829 | 0.844 | 0.954 | 0.836 | 1.511 | 0.011 | 0.942 | 0.830 |
| 1372224_at   | BE119694 | --- | --- | 1.044 | 0.849 | 1.035 | 0.693 | 1.077 | 0.802 | 1.081 | 0.977 |
| 1373444_at   | BF285926 | --- | --- | 0.851 | 0.850 | 0.907 | 0.758 | 1.061 | 0.722 | 0.882 | 0.228 |
| 1394500_at   | BI288738 | --- | --- | 0.998 | 0.851 | 0.934 | 0.972 | 1.000 | 0.963 | 0.998 | 0.980 |
| 1383975_at   | AW435364 | --- | --- | 1.297 | 0.854 | 0.943 | 0.064 | 0.971 | 0.172 | 0.891 | 0.044 |
| 1374402_at   | BM391160 | --- | --- | 1.043 | 0.855 | 0.852 | 0.723 | 1.018 | 0.766 | 1.156 | 0.460 |
| 1371884_at   | AI009909 | --- | --- | 0.924 | 0.855 | 0.959 | 0.309 | 1.065 | 0.810 | 1.049 | 0.405 |
| 1394540_at   | BF387197 | --- | --- | 1.763 | 0.856 | 1.046 | 0.603 | 1.311 | 0.259 | 0.881 | 0.611 |
| 1379135_at   | BE112728 | --- | --- | 0.932 | 0.857 | 1.402 | 0.565 | 0.682 | 0.567 | 0.576 | 0.148 |
| 1379786_at   | AI029721 | --- | --- | 0.956 | 0.858 | 1.169 | 0.698 | 1.329 | 0.088 | 1.349 | 0.579 |
| 1373579_at   | AA945758 | --- | --- | 1.010 | 0.860 | 1.059 | 0.273 | 0.962 | 0.966 | 1.030 | 0.875 |
| 1394434_at   | BF414439 | --- | --- | 0.575 | 0.861 | 2.377 | 0.005 | 0.588 | 0.245 | 2.062 | 0.072 |
| 1374179_at   | BF285334 | --- | --- | 0.698 | 0.862 | 2.615 | 0.020 | 0.798 | 0.303 | 1.569 | 0.056 |
| 1373901_at   | BI278570 | --- | --- | 0.907 | 0.862 | 2.480 | 0.013 | 1.005 | 0.978 | 2.252 | 0.024 |
| 1380733_at   | BI286088 | --- | --- | 1.011 | 0.864 | 1.478 | 0.025 | 0.896 | 0.040 | 1.176 | 0.252 |
| 1397268_at   | BI295515 | --- | --- | 1.859 | 0.864 | 0.875 | 0.431 | 1.104 | 0.652 | 0.909 | 0.495 |
| 1396773_at   | BF391930 | --- | --- | 1.062 | 0.865 | 1.001 | 0.380 | 1.413 | 0.011 | 1.125 | 0.801 |
| 1379314_at   | BF283985 | --- | --- | 0.884 | 0.865 | 0.824 | 0.049 | 0.745 | 0.462 | 0.910 | 0.203 |
| 1381003_at   | BE096129 | --- | --- | 1.178 | 0.866 | 0.798 | 0.209 | 1.296 | 0.943 | 0.671 | 0.398 |
| 1397012_at   | AI411908 | --- | --- | 0.972 | 0.866 | 0.956 | 0.460 | 1.612 | 0.117 | 1.001 | 0.954 |
| 1381129_at   | BF392367 | --- | --- | 1.022 | 0.867 | 1.392 | 0.708 | 1.341 | 0.208 | 1.357 | 0.120 |
| 1388374_at   | AI412011 | --- | --- | 0.929 | 0.867 | 0.713 | 0.094 | 0.738 | 0.983 | 1.000 | 0.335 |
| 1380027_at   | AW523502 | --- | --- | 0.987 | 0.868 | 0.997 | 0.979 | 0.992 | 0.999 | 0.992 | 0.977 |
| 1395935_at   | BF282716 | --- | --- | 1.098 | 0.869 | 0.969 | 0.277 | 1.144 | 0.950 | 0.901 | 0.674 |
| 1388159_at   | AA849795 | --- | --- | 1.157 | 0.870 | 0.759 | 0.041 | 0.987 | 0.232 | 0.780 | 0.065 |
| 1379862_at   | BF400663 | --- | --- | 1.056 | 0.870 | 1.092 | 0.312 | 0.984 | 0.870 | 1.095 | 0.205 |
| 1389683_at   | AI170768 | --- | --- | 1.207 | 0.871 | 1.182 | 0.193 | 1.504 | 0.009 | 1.142 | 0.336 |
| 1382574_at   | AI176776 | --- | --- | 0.995 | 0.871 | 1.636 | 0.064 | 1.219 | 0.074 | 1.566 | 0.146 |
| 1372058_at   | AI177914 | --- | --- | 0.963 | 0.872 | 1.213 | 0.009 | 0.953 | 0.540 | 1.470 | 0.005 |
| 1373517_at   | BG671501 | --- | --- | 1.185 | 0.873 | 1.497 | 0.001 | 1.007 | 0.805 | 1.482 | 0.010 |
| 1377328_at   | BI290012 | --- | --- | 1.459 | 0.873 | 1.299 | 0.361 | 1.789 | 0.633 | 1.084 | 0.961 |
| 1386039_x_at | BF288392 | --- | --- | 0.929 | 0.874 | 1.440 | 0.389 | 1.243 | 0.110 | 1.624 | 0.688 |
| 1375266_at   | BG380633 | --- | --- | 0.805 | 0.874 | 0.416 | 0.040 | 0.742 | 0.225 | 0.354 | 0.007 |
| 1392713_a_at | AA892541 | --- | --- | 0.741 | 0.875 | 0.999 | 0.684 | 0.641 | 0.515 | 0.802 | 0.171 |
| 1376822_at   | BI297481 | --- | --- | 1.000 | 0.877 | 1.002 | 0.975 | 1.006 | 0.985 | 0.995 | 0.932 |
| 1375602_at   | BG378103 | --- | --- | 1.070 | 0.879 | 0.796 | 0.544 | 1.696 | 0.037 | 0.786 | 0.455 |
| 1372743_at   | AI409727 | --- | --- | 1.058 | 0.879 | 1.065 | 0.495 | 0.939 | 0.680 | 1.398 | 0.025 |

|              |          |     |     |       |       |       |       |       |       |       |       |
|--------------|----------|-----|-----|-------|-------|-------|-------|-------|-------|-------|-------|
| 1392709_at   | BF286936 | --- | --- | 1.089 | 0.881 | 1.467 | 0.347 | 1.284 | 0.171 | 1.322 | 0.572 |
| 1397949_at   | BE117532 | --- | --- | 1.024 | 0.881 | 1.087 | 0.963 | 1.148 | 0.043 | 1.099 | 0.166 |
| 1396493_at   | BF403409 | --- | --- | 1.099 | 0.882 | 0.650 | 0.370 | 1.396 | 0.559 | 1.145 | 0.674 |
| 1395314_at   | AA924452 | --- | --- | 1.062 | 0.883 | 1.072 | 0.747 | 1.220 | 0.199 | 0.975 | 0.805 |
| 1394000_at   | BM391003 | --- | --- | 1.001 | 0.883 | 1.123 | 0.674 | 0.796 | 0.733 | 0.999 | 0.996 |
| 1397355_at   | AW916626 | --- | --- | 1.061 | 0.885 | 0.824 | 0.907 | 1.187 | 0.405 | 0.995 | 0.981 |
| 1394886_at   | AI235545 | --- | --- | 0.883 | 0.886 | 1.218 | 0.422 | 1.046 | 0.078 | 1.023 | 0.816 |
| 1392356_at   | AW528693 | --- | --- | 1.005 | 0.886 | 1.310 | 0.994 | 1.330 | 0.245 | 0.999 | 0.993 |
| 1394471_at   | BF291036 | --- | --- | 0.934 | 0.886 | 1.026 | 0.558 | 1.046 | 0.745 | 0.452 | 0.089 |
| 1395566_at   | AW524204 | --- | --- | 1.002 | 0.887 | 0.990 | 0.990 | 1.348 | 0.097 | 1.068 | 0.837 |
| 1378123_x_at | BI285319 | --- | --- | 1.064 | 0.888 | 0.825 | 0.370 | 1.124 | 0.291 | 1.169 | 0.903 |
| 1373426_at   | BI282894 | --- | --- | 0.942 | 0.889 | 1.117 | 0.438 | 0.774 | 0.006 | 1.223 | 0.982 |
| 1389904_at   | AI171529 | --- | --- | 0.963 | 0.889 | 0.789 | 0.001 | 1.019 | 0.445 | 0.800 | 0.021 |
| 1372337_at   | AA800242 | --- | --- | 0.845 | 0.889 | 1.234 | 0.599 | 0.618 | 0.140 | 1.290 | 0.094 |
| 1396571_at   | BF418055 | --- | --- | 0.968 | 0.890 | 0.914 | 0.169 | 0.966 | 0.861 | 0.897 | 0.553 |
| 1392828_at   | BI283139 | --- | --- | 0.683 | 0.890 | 0.626 | 0.023 | 1.359 | 0.352 | 0.930 | 0.652 |
| 1383054_at   | BE111631 | --- | --- | 1.174 | 0.890 | 3.084 | 0.004 | 1.443 | 0.553 | 2.002 | 0.007 |
| 1384260_at   | BE095699 | --- | --- | 1.057 | 0.891 | 1.107 | 0.487 | 1.176 | 0.349 | 1.315 | 0.911 |
| 1389424_at   | BI289475 | --- | --- | 0.921 | 0.891 | 0.510 | 0.014 | 1.566 | 0.316 | 1.027 | 0.234 |
| 1376882_at   | BF398580 | --- | --- | 1.018 | 0.892 | 0.560 | 0.083 | 0.841 | 0.666 | 0.936 | 0.259 |
| 1371508_at   | AI412098 | --- | --- | 0.922 | 0.893 | 0.859 | 0.287 | 1.011 | 0.415 | 0.690 | 0.064 |
| 1386102_at   | AA851046 | --- | --- | 1.004 | 0.894 | 0.956 | 0.929 | 1.035 | 0.767 | 1.010 | 0.946 |
| 1392953_at   | BI296250 | --- | --- | 0.951 | 0.897 | 1.340 | 0.020 | 0.807 | 0.211 | 1.307 | 0.088 |
| 1376342_at   | BI295185 | --- | --- | 1.004 | 0.899 | 1.000 | 0.998 | 1.382 | 0.108 | 0.950 | 0.962 |
| 1393053_at   | AI179443 | --- | --- | 0.725 | 0.900 | 0.789 | 0.031 | 0.737 | 0.816 | 0.787 | 0.014 |
| 1397834_at   | BI294052 | --- | --- | 1.035 | 0.901 | 0.875 | 0.964 | 1.245 | 0.070 | 0.932 | 0.946 |
| 1390808_at   | AW534721 | --- | --- | 1.550 | 0.903 | 1.000 | 0.671 | 1.047 | 0.205 | 1.154 | 0.438 |
| 1374926_at   | AI102985 | --- | --- | 1.026 | 0.904 | 2.391 | 0.039 | 0.938 | 0.812 | 1.895 | 0.035 |
| 1383168_at   | BE102209 | --- | --- | 0.751 | 0.904 | 1.268 | 0.090 | 0.770 | 0.371 | 1.427 | 0.040 |
| 1376472_at   | AI714119 | --- | --- | 1.019 | 0.906 | 1.092 | 0.947 | 1.118 | 0.498 | 1.147 | 0.993 |
| 1389820_at   | BF289041 | --- | --- | 0.994 | 0.906 | 0.857 | 0.252 | 0.755 | 0.168 | 0.932 | 0.974 |
| 1377652_at   | BE103109 | --- | --- | 0.951 | 0.906 | 1.065 | 0.740 | 1.518 | 0.095 | 0.716 | 0.740 |
| 1394701_at   | BF290084 | --- | --- | 1.001 | 0.907 | 1.001 | 0.923 | 1.002 | 0.930 | 1.001 | 0.961 |
| 1379366_a_at | AW529938 | --- | --- | 0.945 | 0.907 | 4.113 | 0.030 | 0.964 | 0.739 | 1.867 | 0.301 |
| 1378122_a_at | BI285319 | --- | --- | 0.789 | 0.916 | 0.773 | 0.756 | 1.170 | 0.695 | 0.833 | 0.850 |
| 1396160_at   | BF419307 | --- | --- | 0.702 | 0.916 | 0.658 | 0.102 | 0.958 | 0.859 | 0.755 | 0.200 |
| 1379008_at   | BE104149 | --- | --- | 0.539 | 0.916 | 1.299 | 0.632 | 0.649 | 0.727 | 1.030 | 0.635 |
| 1394629_at   | AA944369 | --- | --- | 0.958 | 0.916 | 1.001 | 0.958 | 0.960 | 0.151 | 1.138 | 0.843 |
| 1390430_at   | BF284190 | --- | --- | 0.955 | 0.916 | 1.474 | 0.242 | 0.954 | 0.634 | 1.548 | 0.183 |
| 1398376_at   | AI104587 | --- | --- | 0.904 | 0.918 | 2.518 | 0.001 | 0.757 | 0.122 | 1.668 | 0.009 |
| 1385056_at   | BG372572 | --- | --- | 1.169 | 0.918 | 1.645 | 0.083 | 0.965 | 0.261 | 0.933 | 0.978 |
| 1394694_at   | AI454646 | --- | --- | 0.967 | 0.919 | 1.000 | 0.979 | 0.988 | 0.435 | 1.001 | 0.989 |
| 1383947_at   | AI556074 | --- | --- | 0.987 | 0.919 | 0.999 | 0.992 | 0.974 | 0.872 | 1.102 | 0.585 |
| 1372367_at   | BF414035 | --- | --- | 1.040 | 0.919 | 1.019 | 0.051 | 0.933 | 0.765 | 1.078 | 0.325 |
| 1390722_at   | AW531272 | --- | --- | 1.021 | 0.921 | 0.582 | 0.104 | 0.450 | 0.237 | 0.620 | 0.162 |
| 1375127_at   | BI395849 | --- | --- | 0.864 | 0.922 | 1.431 | 0.144 | 0.734 | 0.495 | 1.425 | 0.013 |
| 1373776_at   | AI406341 | --- | --- | 1.017 | 0.924 | 0.595 | 0.273 | 1.085 | 0.538 | 0.854 | 0.015 |
| 1373897_at   | AI103106 | --- | --- | 0.969 | 0.925 | 0.603 | 0.030 | 0.993 | 0.968 | 0.475 | 0.024 |
| 1372405_at   | BE107128 | --- | --- | 0.981 | 0.928 | 0.764 | 0.050 | 0.844 | 0.435 | 0.498 | 0.018 |
| 1386071_at   | AI070564 | --- | --- | 0.966 | 0.929 | 0.924 | 0.155 | 1.028 | 0.784 | 0.853 | 0.023 |
| 1389359_at   | BE120823 | --- | --- | 1.007 | 0.929 | 1.725 | 0.004 | 1.039 | 0.483 | 1.598 | 0.018 |
| 1383017_at   | AI639001 | --- | --- | 1.038 | 0.930 | 0.592 | 0.096 | 0.785 | 0.340 | 0.615 | 0.119 |
| 1394413_at   | AA819514 | --- | --- | 0.983 | 0.932 | 0.696 | 0.068 | 1.034 | 0.748 | 0.957 | 0.876 |
| 1382650_at   | AA850953 | --- | --- | 1.154 | 0.932 | 1.191 | 0.987 | 1.519 | 0.326 | 1.131 | 0.676 |
| 1390728_at   | AI501517 | --- | --- | 0.950 | 0.932 | 0.740 | 0.498 | 0.567 | 0.029 | 0.688 | 0.147 |
| 1386467_at   | H33140   | --- | --- | 0.970 | 0.933 | 0.998 | 0.432 | 1.001 | 0.116 | 0.974 | 0.310 |
| 1375340_at   | AI104151 | --- | --- | 1.038 | 0.933 | 0.829 | 0.054 | 0.999 | 0.064 | 0.842 | 0.087 |
| 1388726_a_at | AA800242 | --- | --- | 1.015 | 0.934 | 1.229 | 0.540 | 0.840 | 0.159 | 1.118 | 0.070 |
| 1390378_at   | BE107173 | --- | --- | 0.979 | 0.934 | 0.791 | 0.652 | 1.023 | 0.246 | 0.669 | 0.033 |
| 1375108_at   | AI008105 | --- | --- | 1.010 | 0.934 | 0.629 | 0.033 | 0.962 | 0.274 | 0.777 | 0.165 |
| 1398410_at   | AW535349 | --- | --- | 1.761 | 0.935 | 1.184 | 0.670 | 1.810 | 0.944 | 1.080 | 0.808 |



|              |          |     |     |       |       |       |       |       |       |       |       |
|--------------|----------|-----|-----|-------|-------|-------|-------|-------|-------|-------|-------|
| 1394447_at   | BF419701 | --- | --- | 1.014 | 0.936 | 1.040 | 0.920 | 1.149 | 0.165 | 1.013 | 0.758 |
| 1398726_at   | AI502051 | --- | --- | 1.034 | 0.936 | 1.330 | 0.303 | 1.643 | 0.089 | 0.435 | 0.515 |
| 1397323_x_at | AW141996 | --- | --- | 1.150 | 0.937 | 0.566 | 0.063 | 1.107 | 0.802 | 0.609 | 0.142 |
| 1391551_at   | BM391857 | --- | --- | 1.300 | 0.938 | 0.994 | 0.206 | 1.309 | 0.209 | 1.257 | 0.304 |
| 1372600_at   | BI289613 | --- | --- | 1.007 | 0.938 | 1.048 | 0.977 | 1.271 | 0.072 | 1.046 | 0.986 |
| 1383712_at   | BF524281 | --- | --- | 0.826 | 0.939 | 1.528 | 0.039 | 0.860 | 0.086 | 1.234 | 0.023 |
| 1385959_at   | AI176851 | --- | --- | 0.884 | 0.940 | 1.577 | 0.079 | 0.954 | 0.401 | 1.031 | 0.963 |
| 1393285_at   | BF561264 | --- | --- | 1.191 | 0.940 | 1.195 | 0.524 | 1.349 | 0.990 | 1.003 | 0.824 |
| 1372997_at   | AI105243 | --- | --- | 1.090 | 0.943 | 0.968 | 0.595 | 1.250 | 0.667 | 1.313 | 0.191 |
| 1395848_at   | AA998703 | --- | --- | 0.974 | 0.943 | 0.988 | 0.105 | 1.292 | 0.933 | 1.036 | 0.914 |
| 1394318_at   | AW918228 | --- | --- | 0.997 | 0.943 | 1.480 | 0.059 | 1.000 | 0.988 | 1.312 | 0.063 |
| 1394798_at   | AA859580 | --- | --- | 1.390 | 0.943 | 0.963 | 0.095 | 1.275 | 0.192 | 1.112 | 0.630 |
| 1386037_at   | BF288392 | --- | --- | 0.969 | 0.944 | 1.185 | 0.469 | 1.377 | 0.054 | 1.301 | 0.484 |
| 1371854_at   | BG374451 | --- | --- | 0.980 | 0.944 | 5.675 | 0.014 | 0.856 | 0.020 | 1.820 | 0.074 |
| 1378746_at   | AI013683 | --- | --- | 0.970 | 0.946 | 1.001 | 0.180 | 1.420 | 0.102 | 1.287 | 0.436 |
| 1392884_at   | AI172267 | --- | --- | 0.993 | 0.946 | 0.742 | 0.016 | 0.965 | 0.614 | 0.852 | 0.109 |
| 1379391_at   | AI103389 | --- | --- | 1.128 | 0.947 | 1.337 | 0.990 | 1.486 | 0.059 | 0.998 | 0.994 |
| 1396769_at   | AW527250 | --- | --- | 1.002 | 0.947 | 2.678 | 0.040 | 1.332 | 0.500 | 1.277 | 0.986 |
| 1397869_at   | AI453907 | --- | --- | 1.001 | 0.949 | 0.913 | 0.160 | 1.000 | 0.290 | 0.911 | 0.165 |
| 1375418_at   | BI275823 | --- | --- | 0.992 | 0.950 | 0.944 | 0.671 | 0.993 | 0.968 | 0.697 | 0.752 |
| 1373387_at   | BF558946 | --- | --- | 0.973 | 0.951 | 1.035 | 0.871 | 0.724 | 0.351 | 1.106 | 0.835 |
| 1376085_at   | AA849731 | --- | --- | 1.013 | 0.952 | 1.123 | 0.854 | 0.980 | 0.873 | 1.036 | 0.777 |
| 1373291_at   | AI176713 | --- | --- | 0.961 | 0.953 | 0.311 | 0.002 | 0.998 | 0.969 | 0.387 | 0.002 |
| 1391525_at   | AW141615 | --- | --- | 1.472 | 0.954 | 2.262 | 0.345 | 1.289 | 0.691 | 1.098 | 0.762 |
| 1375708_at   | BF392901 | --- | --- | 1.047 | 0.954 | 0.539 | 0.002 | 1.870 | 0.157 | 0.747 | 0.189 |
| 1378360_at   | BF397301 | --- | --- | 1.172 | 0.956 | 1.068 | 0.098 | 0.901 | 0.055 | 1.297 | 0.440 |
| 1382838_at   | AA799942 | --- | --- | 1.067 | 0.956 | 0.813 | 0.119 | 1.021 | 0.640 | 0.967 | 0.091 |
| 1373088_at   | BI295811 | --- | --- | 0.992 | 0.957 | 1.519 | 0.001 | 0.810 | 0.368 | 1.350 | 0.000 |
| 1384390_at   | BI278808 | --- | --- | 1.002 | 0.957 | 1.297 | 0.039 | 0.998 | 0.713 | 1.119 | 0.209 |
| 1374705_at   | AA891834 | --- | --- | 1.025 | 0.958 | 0.369 | 0.014 | 1.664 | 0.808 | 0.509 | 0.079 |
| 1386038_x_at | BF288392 | --- | --- | 1.063 | 0.958 | 1.341 | 0.230 | 1.295 | 0.119 | 1.056 | 0.140 |
| 1397577_at   | BF397749 | --- | --- | 1.395 | 0.959 | 0.815 | 0.759 | 1.248 | 0.425 | 1.119 | 0.794 |
| 1391710_at   | AW251144 | --- | --- | 1.001 | 0.959 | 1.221 | 0.079 | 1.012 | 0.857 | 1.010 | 0.176 |
| 1385264_at   | AA892746 | --- | --- | 1.002 | 0.959 | 1.006 | 0.959 | 1.003 | 0.999 | 1.008 | 0.998 |
| 1374897_at   | AI406842 | --- | --- | 0.838 | 0.960 | 1.290 | 0.086 | 0.904 | 0.200 | 1.054 | 0.465 |
| 1393517_at   | BE097991 | --- | --- | 0.988 | 0.960 | 0.891 | 0.660 | 1.000 | 0.967 | 0.953 | 0.394 |
| 1371521_at   | BI284797 | --- | --- | 0.874 | 0.961 | 1.717 | 0.013 | 0.784 | 0.101 | 1.775 | 0.025 |
| 1382897_at   | BF393872 | --- | --- | 1.005 | 0.962 | 0.610 | 0.001 | 0.949 | 0.994 | 0.532 | 0.026 |
| 1397408_at   | AI407913 | --- | --- | 1.001 | 0.963 | 1.040 | 0.949 | 1.010 | 0.765 | 0.997 | 0.613 |
| 1397606_at   | D85807   | --- | --- | 0.960 | 0.963 | 1.464 | 0.381 | 1.538 | 0.075 | 1.730 | 0.210 |
| 1372686_at   | BE113476 | --- | --- | 0.978 | 0.964 | 1.575 | 0.175 | 1.388 | 0.716 | 1.610 | 0.238 |
| 1373353_at   | BE097309 | --- | --- | 0.911 | 0.966 | 1.156 | 0.324 | 1.002 | 0.980 | 0.875 | 0.828 |
| 1392227_at   | BI288917 | --- | --- | 0.554 | 0.967 | 1.109 | 0.997 | 0.998 | 0.995 | 1.035 | 0.649 |
| 1376352_at   | BF394095 | --- | --- | 1.010 | 0.967 | 0.998 | 0.462 | 1.048 | 0.745 | 0.997 | 0.015 |
| 1383517_at   | AA998001 | --- | --- | 1.010 | 0.969 | 0.884 | 0.123 | 1.216 | 0.173 | 0.966 | 0.080 |
| 1384692_at   | AI172110 | --- | --- | 1.013 | 0.969 | 0.953 | 0.666 | 1.469 | 0.147 | 1.716 | 0.142 |
| 1378595_at   | BE113427 | --- | --- | 1.154 | 0.970 | 1.166 | 0.842 | 1.111 | 0.639 | 1.154 | 0.467 |
| 1378031_at   | AI230161 | --- | --- | 1.093 | 0.971 | 1.553 | 0.069 | 0.738 | 0.060 | 1.066 | 0.122 |
| 1395259_at   | BI295572 | --- | --- | 1.001 | 0.971 | 0.995 | 0.958 | 1.016 | 0.926 | 0.998 | 0.576 |
| 1374482_at   | AW142993 | --- | --- | 0.937 | 0.972 | 0.533 | 0.036 | 1.076 | 0.603 | 0.629 | 0.103 |
| 1374932_at   | BI282731 | --- | --- | 0.843 | 0.972 | 2.097 | 0.095 | 0.533 | 0.003 | 1.613 | 0.661 |
| 1399103_at   | BF414041 | --- | --- | 0.824 | 0.973 | 0.488 | 0.062 | 1.025 | 0.855 | 0.815 | 0.155 |
| 1375860_at   | AI011063 | --- | --- | 0.947 | 0.973 | 1.251 | 0.131 | 0.679 | 0.072 | 0.899 | 0.109 |
| 1374529_at   | AI406660 | --- | --- | 1.220 | 0.973 | 0.149 | 0.000 | 1.032 | 0.758 | 0.154 | 0.001 |
| 1390128_at   | BF557618 | --- | --- | 1.003 | 0.973 | 1.090 | 0.936 | 1.003 | 0.905 | 0.988 | 0.929 |
| 1383361_at   | BM383741 | --- | --- | 1.151 | 0.973 | 1.054 | 0.259 | 0.826 | 0.255 | 1.122 | 0.039 |
| 1389434_at   | BE110675 | --- | --- | 1.011 | 0.974 | 0.995 | 0.153 | 1.064 | 0.947 | 1.378 | 0.047 |
| 1383053_x_at | BE112093 | --- | --- | 1.000 | 0.974 | 2.939 | 0.066 | 1.027 | 0.923 | 0.967 | 0.817 |
| 1393305_at   | BF399398 | --- | --- | 0.914 | 0.975 | 0.334 | 0.005 | 0.945 | 0.994 | 0.477 | 0.113 |
| 1394491_at   | BI301512 | --- | --- | 1.016 | 0.975 | 0.958 | 0.579 | 1.227 | 0.004 | 0.971 | 0.718 |
| 1395069_at   | BF400622 | --- | --- | 0.567 | 0.975 | 2.831 | 0.015 | 1.268 | 0.882 | 2.352 | 0.525 |

|              |          |     |     |       |       |       |       |       |       |       |       |
|--------------|----------|-----|-----|-------|-------|-------|-------|-------|-------|-------|-------|
| 1373010_at   | BG372059 | --- | --- | 1.049 | 0.976 | 0.995 | 0.960 | 1.003 | 0.808 | 0.974 | 0.573 |
| 1396079_at   | BF558358 | --- | --- | 1.003 | 0.977 | 1.002 | 0.253 | 0.727 | 0.016 | 0.828 | 0.627 |
| 1379098_at   | AI071602 | --- | --- | 0.999 | 0.977 | 1.150 | 0.511 | 1.580 | 0.616 | 1.232 | 0.384 |
| 1383433_at   | BI281874 | --- | --- | 0.997 | 0.979 | 0.246 | 0.018 | 1.004 | 0.984 | 0.254 | 0.020 |
| 1372943_at   | AI072985 | --- | --- | 0.885 | 0.979 | 1.398 | 0.187 | 0.737 | 0.043 | 1.283 | 0.013 |
| 1378928_at   | BF387639 | --- | --- | 0.998 | 0.979 | 0.999 | 0.992 | 1.003 | 0.998 | 1.000 | 0.995 |
| 1397538_at   | BF407593 | --- | --- | 0.995 | 0.980 | 1.442 | 0.018 | 0.820 | 0.375 | 1.935 | 0.027 |
| 1395047_at   | BF397243 | --- | --- | 1.375 | 0.980 | 0.837 | 0.083 | 0.997 | 0.988 | 0.793 | 0.053 |
| 1393662_at   | BF396974 | --- | --- | 0.750 | 0.980 | 0.883 | 0.950 | 1.486 | 0.112 | 0.713 | 0.552 |
| 1380138_at   | AI385182 | --- | --- | 1.006 | 0.980 | 1.089 | 0.412 | 1.184 | 0.208 | 1.454 | 0.212 |
| 1386302_at   | AI179140 | --- | --- | 0.999 | 0.980 | 2.376 | 0.103 | 1.246 | 0.742 | 1.660 | 0.259 |
| 1384010_at   | AW920178 | --- | --- | 1.045 | 0.980 | 0.541 | 0.175 | 1.280 | 0.229 | 0.612 | 0.194 |
| 1390603_at   | AA956317 | --- | --- | 0.996 | 0.980 | 1.444 | 0.053 | 0.918 | 0.629 | 1.220 | 0.238 |
| 1395501_at   | BE120578 | --- | --- | 1.006 | 0.981 | 0.457 | 0.059 | 1.002 | 0.989 | 0.444 | 0.045 |
| 1391518_at   | AI579823 | --- | --- | 0.775 | 0.982 | 0.885 | 0.135 | 1.002 | 0.993 | 0.596 | 0.147 |
| 1397338_at   | AI137999 | --- | --- | 1.027 | 0.982 | 0.853 | 0.067 | 0.758 | 0.433 | 1.054 | 0.297 |
| 1394633_at   | BF288321 | --- | --- | 1.655 | 0.983 | 1.387 | 0.133 | 1.012 | 0.864 | 1.537 | 0.196 |
| 1378743_at   | BE106252 | --- | --- | 1.006 | 0.983 | 0.735 | 0.019 | 1.010 | 0.784 | 0.984 | 0.914 |
| 1378121_at   | AI600165 | --- | --- | 0.954 | 0.983 | 0.692 | 0.151 | 0.929 | 0.725 | 0.617 | 0.817 |
| 1381734_at   | BF400855 | --- | --- | 0.979 | 0.983 | 0.671 | 0.064 | 1.739 | 0.056 | 1.117 | 0.479 |
| 1397895_at   | BI290793 | --- | --- | 0.825 | 0.985 | 0.558 | 0.000 | 0.818 | 0.993 | 0.878 | 0.559 |
| 1396371_at   | BF412674 | --- | --- | 0.990 | 0.986 | 1.005 | 0.917 | 1.158 | 0.369 | 1.611 | 0.069 |
| 1371994_at   | AI412316 | --- | --- | 1.143 | 0.986 | 0.780 | 0.046 | 1.084 | 0.737 | 0.767 | 0.026 |
| 1396498_at   | BF393477 | --- | --- | 0.998 | 0.987 | 0.987 | 0.806 | 1.001 | 0.711 | 0.998 | 0.072 |
| 1392239_at   | BF386993 | --- | --- | 1.000 | 0.987 | 1.269 | 0.050 | 1.001 | 0.989 | 1.032 | 0.609 |
| 1390975_at   | BE111775 | --- | --- | 1.000 | 0.988 | 0.987 | 0.966 | 1.250 | 0.063 | 1.001 | 0.996 |
| 1389603_at   | AA964544 | --- | --- | 0.903 | 0.989 | 0.984 | 0.869 | 1.031 | 0.574 | 0.995 | 0.829 |
| 1383329_at   | BI303892 | --- | --- | 0.999 | 0.990 | 0.915 | 0.439 | 1.004 | 0.996 | 0.771 | 0.751 |
| 1372589_at   | AI177689 | --- | --- | 0.417 | 0.990 | 1.469 | 0.249 | 0.894 | 0.665 | 1.388 | 0.874 |
| 1396973_at   | BF404479 | --- | --- | 0.995 | 0.990 | 0.997 | 0.550 | 1.000 | 0.981 | 1.002 | 0.903 |
| 1395048_at   | BM384985 | --- | --- | 0.996 | 0.991 | 1.026 | 0.897 | 1.302 | 0.022 | 0.871 | 0.681 |
| 1395660_at   | BE114185 | --- | --- | 1.004 | 0.991 | 0.139 | 0.000 | 0.869 | 0.996 | 0.201 | 0.024 |
| 1377839_at   | BG378776 | --- | --- | 0.889 | 0.991 | 1.044 | 0.509 | 0.998 | 0.425 | 1.029 | 0.838 |
| 1382597_at   | BF288069 | --- | --- | 1.004 | 0.991 | 1.073 | 0.296 | 1.013 | 0.957 | 0.993 | 0.202 |
| 1389000_at   | AA964998 | --- | --- | 1.001 | 0.992 | 0.646 | 0.013 | 1.406 | 0.149 | 0.813 | 0.495 |
| 1384936_at   | AI136316 | --- | --- | 1.089 | 0.992 | 0.256 | 0.008 | 1.146 | 0.923 | 0.278 | 0.019 |
| 1396179_at   | BF406314 | --- | --- | 1.003 | 0.992 | 0.998 | 0.978 | 1.341 | 0.317 | 0.999 | 0.998 |
| 1386850_x_at | AW921365 | --- | --- | 1.002 | 0.993 | 1.001 | 0.554 | 0.999 | 0.825 | 0.924 | 0.933 |
| 1375913_at   | BI285430 | --- | --- | 0.999 | 0.993 | 0.260 | 0.022 | 1.265 | 0.328 | 0.274 | 0.024 |
| 1397974_at   | BE110207 | --- | --- | 1.001 | 0.993 | 1.095 | 0.843 | 0.933 | 0.077 | 0.878 | 0.300 |
| 1393551_at   | AI044529 | --- | --- | 0.907 | 0.993 | 1.395 | 0.038 | 2.457 | 0.257 | 2.432 | 0.053 |
| 1377199_at   | BI274530 | --- | --- | 0.998 | 0.994 | 0.325 | 0.005 | 0.556 | 0.146 | 0.468 | 0.239 |
| 1373154_at   | BI278842 | --- | --- | 0.998 | 0.994 | 0.786 | 0.240 | 0.819 | 0.991 | 0.740 | 0.994 |
| 1394444_at   | BF286450 | --- | --- | 0.998 | 0.994 | 0.999 | 0.983 | 0.966 | 0.990 | 0.999 | 0.888 |
| 1384538_at   | BE115544 | --- | --- | 0.998 | 0.994 | 0.937 | 0.992 | 0.985 | 0.955 | 0.940 | 0.335 |
| 1393455_at   | AA998007 | --- | --- | 1.002 | 0.994 | 0.549 | 0.002 | 0.752 | 0.980 | 0.676 | 0.005 |
| 1383379_at   | AI059153 | --- | --- | 0.999 | 0.994 | 1.446 | 0.007 | 1.001 | 0.997 | 1.096 | 0.821 |
| 1376948_at   | BI281216 | --- | --- | 0.984 | 0.994 | 0.593 | 0.691 | 1.009 | 0.183 | 0.793 | 0.576 |
| 1374986_x_at | BI281143 | --- | --- | 1.069 | 0.995 | 0.980 | 0.462 | 1.240 | 0.485 | 1.307 | 0.299 |
| 1388419_at   | AW915005 | --- | --- | 1.002 | 0.995 | 0.843 | 0.033 | 0.998 | 0.980 | 0.942 | 0.436 |
| 1392377_at   | BF409415 | --- | --- | 1.007 | 0.995 | 0.782 | 0.371 | 1.125 | 0.067 | 0.897 | 0.859 |
| 1381284_at   | BF386160 | --- | --- | 1.002 | 0.996 | 1.727 | 0.004 | 0.742 | 0.506 | 1.579 | 0.045 |
| 1391097_at   | BF418831 | --- | --- | 0.999 | 0.996 | 0.645 | 0.065 | 0.717 | 0.080 | 0.464 | 0.036 |
| 1383845_at   | AI059929 | --- | --- | 1.027 | 0.996 | 0.987 | 0.178 | 0.999 | 0.993 | 1.034 | 0.232 |
| 1395645_at   | BF408105 | --- | --- | 1.002 | 0.996 | 1.941 | 0.024 | 1.404 | 0.537 | 1.505 | 0.052 |
| 1384449_at   | AA964588 | --- | --- | 1.000 | 0.996 | 1.709 | 0.016 | 0.574 | 0.112 | 1.814 | 0.011 |
| 1396440_at   | BF419659 | --- | --- | 1.044 | 0.996 | 0.986 | 0.767 | 1.049 | 0.826 | 1.077 | 0.333 |
| 1375971_at   | BM386028 | --- | --- | 0.798 | 0.997 | 1.072 | 0.386 | 0.744 | 0.213 | 0.999 | 0.982 |
| 1396598_at   | BF405060 | --- | --- | 0.999 | 0.997 | 1.093 | 0.371 | 1.005 | 0.971 | 1.097 | 0.400 |
| 1384195_at   | BM388427 | --- | --- | 1.853 | 0.997 | 1.142 | 0.212 | 1.612 | 0.890 | 1.219 | 0.642 |
| 1381103_a_at | AA996485 | --- | --- | 0.954 | 0.997 | 3.358 | 0.000 | 0.978 | 0.693 | 2.724 | 0.003 |

|            |          |     |     |       |       |       |       |       |       |       |       |
|------------|----------|-----|-----|-------|-------|-------|-------|-------|-------|-------|-------|
| 1396792_at | BF392277 | --- | --- | 1.023 | 0.997 | 0.994 | 0.963 | 0.860 | 0.456 | 1.061 | 0.471 |
| 1377802_at | BE098769 | --- | --- | 0.911 | 0.998 | 1.716 | 0.153 | 0.755 | 0.999 | 1.599 | 0.180 |
| 1383233_at | BI289032 | --- | --- | 0.999 | 0.998 | 1.355 | 0.145 | 0.574 | 0.997 | 1.075 | 0.217 |
| 1384533_at | AW527248 | --- | --- | 1.000 | 0.998 | 0.955 | 0.976 | 1.046 | 0.821 | 0.959 | 0.144 |
| 1380622_at | BI289578 | --- | --- | 1.001 | 0.998 | 0.999 | 0.997 | 1.003 | 0.963 | 1.189 | 0.445 |
| 1397910_at | BF411180 | --- | --- | 1.005 | 0.999 | 1.001 | 0.609 | 1.015 | 0.686 | 0.998 | 0.393 |
| 1398076_at | BF399749 | --- | --- | 1.012 | 1.000 | 1.006 | 0.978 | 1.234 | 0.473 | 0.993 | 0.699 |
| 1385560_at | AI716213 | --- | --- | 0.773 | 1.000 | 0.510 | 0.002 | 1.310 | 0.119 | 0.619 | 0.041 |

Primary rat  $\beta$ -cells were left untreated or exposed to IL1 $\beta$ +IFN- $\gamma$  (IL+IFN) or TNF- $\alpha$ +IFN- $\gamma$  (TNF+IFN) for 6 and 24h. Data are means of three independent experiments and are expressed as fold change versus control cells, studied at the same time points. Pval = p value of Student t-test against control condition at the same time point. Some genes are represented by more than one probe.
