# Supplementary material for: Cytokines Interleukin-1β and Tumor Necrosis Factor-α Regulate Different Transcriptional and Alternative Splicing Networks in Primary β-Cells
Source: PubMed Central journal article supplement — Diabetes. 2009 Nov 23;59(2):358–74. doi: 10.2337/db09-1159 (PMC2809955; doi:10.2337/db09-1159), 2009-11-23
Supplement: supp_db09-1159_suppl_Table_IV.pdf [file supp_db09-1159_suppl_Table_IV.pdf]

**Suppl. Table IV: Up and down regulated genes after exposure to IL-1 $\beta$  + IFN- $\gamma$  for 6h detected by array analysis**

| probe        | GenBank   | gene names/functional groups                                                                           | Symbol   | FC     | localization        |
|--------------|-----------|--------------------------------------------------------------------------------------------------------|----------|--------|---------------------|
|              |           | <b>Cytokine</b>                                                                                        |          |        |                     |
| 1367973_at   | NM_031530 | chemokine (C-C motif) ligand 13                                                                        | CCL13    | 962,72 | Extracellular Space |
| 1369814_at   | AF053312  | chemokine (C-C motif) ligand 20                                                                        | CCL20    | 168,86 | Extracellular Space |
| 1379935_at   | BF419899  | chemokine (C-C motif) ligand 7                                                                         | CCL7     | 131,27 | Extracellular Space |
| 1368200_at   | NM_134455 | chemokine (C-X3-C motif) ligand 1                                                                      | CX3CL1   | 13,04  | Extracellular Space |
| 1388032_a_at | D87927    | chemokine (C-X-C motif) ligand 1 (melanoma growth stimulating activity, alpha)                         | CXCL1    | 3,31   | Extracellular Space |
| 1387969_at   | U22520    | chemokine (C-X-C motif) ligand 10                                                                      | CXCL10   | 262,95 | Extracellular Space |
| 1379365_at   | BF281987  | chemokine (C-X-C motif) ligand 11                                                                      | CXCL11   | 79,73  | Extracellular Space |
| 1372064_at   | BI296385  | chemokine (C-X-C motif) ligand 16                                                                      | CXCL16   | 15,71  | Extracellular Space |
| 1387316_at   | NM_030845 | chemokine (C-X-C motif) ligand 2                                                                       | CXCL2    | 392,45 | Extracellular Space |
| 1368760_at   | NM_053647 | chemokine (C-X-C motif) ligand 3                                                                       | CXCL3    | 282,14 | Extracellular Space |
| 1373544_at   | AI170387  | chemokine (C-X-C motif) ligand 9                                                                       | CXCL9    | 238,15 | Extracellular Space |
| 1382454_at   | AI044222  | chemokine (C-X-C motif) ligand 9                                                                       | CXCL9    | 290,48 | Extracellular Space |
| 1372056_at   | AI406687  | CKLF-like MARVEL transmembrane domain containing 6                                                     | CMTM6    | 2,35   | Extracellular Space |
| 1379631_at   | AI071665  | colony stimulating factor 1 (macrophage)                                                               | CSF1     | 12,69  | Extracellular Space |
| 1368375_a_at | AF015718  | interleukin 15                                                                                         | IL15     | 10,36  | Extracellular Space |
| 1389014_at   | BI297612  | nicotinamide phosphoribosyltransferase                                                                 | NAMPT    | 3,44   | Extracellular Space |
| 1391384_at   | AA819227  | tumor necrosis factor (TNF superfamily, member 2)                                                      | TNF      | 56,92  | Extracellular Space |
|              |           | <b>Enzyme</b>                                                                                          |          |        |                     |
| 1367777_at   | NM_057197 | 2,4-dienoyl CoA reductase 1, mitochondrial                                                             | DECR1    | -2,22  | Cytoplasm           |
| 1370818_at   | AF044574  | 2,4-dienoyl CoA reductase 2, peroxisomal                                                               | DECR2    | -1,53  | Cytoplasm           |
| 1388056_at   | AF068268  | 2'-5' oligoadenylate synthetase 1B                                                                     | OAS1B    | 7,33   | Unknown             |
| 1388118_at   | AI176586  | 3-hydroxyisobutyrate dehydrogenase                                                                     | HIBADH   | -1,82  | Cytoplasm           |
| 1369799_at   | U29701    | 4-aminobutyrate aminotransferase                                                                       | ABAT     | -1,86  | Cytoplasm           |
| 1391107_at   | BI275784  | 5'-3' exoribonuclease 1                                                                                | XRN1     | 4,02   | Cytoplasm           |
| 1379854_at   | AA996933  | abhydrolase domain containing 5                                                                        | ABHD5    | 2,95   | Cytoplasm           |
| 1383416_at   | AA899304  | acetyl-Coenzyme A acetyltransferase 1                                                                  | ACAT1    | -3,11  | Cytoplasm           |
| 1367763_at   | D13921    | acetyl-Coenzyme A acetyltransferase 1                                                                  | ACAT1    | -2,13  | Cytoplasm           |
| 1386916_at   | NM_017321 | aconitase 1, soluble                                                                                   | ACO1     | -4,39  | Cytoplasm           |
| 1397375_at   | BM384537  | acyl-CoA synthetase long-chain family member 5                                                         | ACSL5    | -2,62  | Cytoplasm           |
| 1386926_at   | NM_053607 | acyl-CoA synthetase long-chain family member 5                                                         | ACSL5    | 1,67   | Cytoplasm           |
| 1373389_at   | BM391807  | acyl-Coenzyme A dehydrogenase family, member 9                                                         | ACAD9    | -1,94  | Cytoplasm           |
| 1367702_at   | NM_016986 | acyl-Coenzyme A dehydrogenase, C-4 to C-12 straight chain                                              | ACADM    | -3,26  | Cytoplasm           |
| 1368342_at   | NM_031544 | adenosine monophosphate deaminase (isoform E)                                                          | AMPD3    | 13,27  | Unknown             |
| 1377498_at   | BE100752  | adenosine monophosphate deaminase 2 (isoform L)                                                        | AMPD2    | -5,78  | Unknown             |
| 1367933_at   | NM_031011 | adenosylmethionine decarboxylase 1                                                                     | AMD1     | -1,93  | Unknown             |
| 1367960_at   | NM_019186 | ADP-ribosylation factor-like 4A                                                                        | ARL4A    | 3,24   | Nucleus             |
| 1387867_at   | BG672075  | aldehyde dehydrogenase 9 family, member A1                                                             | ALDH9A1  | -2,18  | Cytoplasm           |
| 1367843_at   | NM_134407 | aldo-keto reductase family 7, member A2 (aflatoxin aldehyde reductase)                                 | AKR7A2   | -2,23  | Cytoplasm           |
| 1367720_at   | NM_012899 | aminolevulinate, delta-, dehydratase                                                                   | ALAD     | -4,35  | Cytoplasm           |
| 1392689_at   | AI105029  | arachidonate lipoxygenase 3                                                                            | ALOXE3   | 7,44   | Unknown             |
| 1368266_at   | NM_017134 | arginase, liver                                                                                        | ARG1     | -1,55  | Cytoplasm           |
| 1370964_at   | BF283456  | argininosuccinate synthetase 1                                                                         | ASS1     | 5,93   | Cytoplasm           |
| 1374823_at   | BI291651  | ariadne homolog, ubiquitin-conjugating enzyme E2 binding protein, 1 (Drosophila)                       | ARIH1    | -1,88  | Cytoplasm           |
| 1389339_at   | BF284062  | arylsulfatase A                                                                                        | ARSA     | -1,57  | Cytoplasm           |
| 1382019_at   | AA998062  | asparagine-linked glycosylation 5, dolichyl-phosphate beta-glucosyltransferase homolog (S. cerevisiae) | ALG5     | -2,19  | Cytoplasm           |
| 1367854_at   | NM_016987 | ATP citrate lyase                                                                                      | ACLY     | -1,64  | Cytoplasm           |
| 1370113_at   | NM_023987 | baculoviral IAP repeat-containing 3                                                                    | BIRC3    | 75,09  | Cytoplasm           |
| 1398373_at   | AA799400  | beta-1,3-N-acetylgalactosaminyltransferase 1 (globoside blood group)                                   | B3GALNT1 | 2,34   | Cytoplasm           |
| 1388617_at   | AW914746  | biphenyl hydrolase-like (serine hydrolase)                                                             | BPHL     | -2,55  | Cytoplasm           |
| 1371886_at   | AI411979  | carnitine acetyltransferase                                                                            | CRAT     | -2,51  | Cytoplasm           |
| 1368426_at   | NM_031987 | carnitine O-octanoyltransferase                                                                        | CROT     | 4,31   | Cytoplasm           |
| 1368418_a_at | AF202115  | ceruloplasmin (ferroxidase)                                                                            | CP       | 38,32  | Extracellular Space |
| 1368420_at   | NM_012532 | ceruloplasmin (ferroxidase)                                                                            | CP       | 57,87  | Extracellular Space |
| 1368419_at   | AF202115  | ceruloplasmin (ferroxidase)                                                                            | CP       | 65,88  | Extracellular Space |

|              |           |                                                                                |                            |        |                 |
|--------------|-----------|--------------------------------------------------------------------------------|----------------------------|--------|-----------------|
| 1393365_at   | AW433625  | chromodomain helicase DNA binding protein 1                                    | CHD1 (includes EG:308215)  | 2,38   | Unknown         |
| 1374945_at   | BI281827  | chromosome 14 open reading frame 172                                           | C14ORF172                  | -2,16  | Unknown         |
| 1367633_at   | BI296610  | coiled-coil domain containing 92                                               | CCDC92 (includes EG:80212) | 2,45   | Cytoplasm       |
| 1392506_at   | AI575645  | crystallin, zeta (quinone reductase)-like 1                                    | CRYZL1                     | -1,83  | Cytoplasm       |
| 1393343_at   | BE115856  | cullin 3                                                                       | CUL3                       | -2,00  | Nucleus         |
| 1367755_at   | NM_052809 | cysteine dioxygenase, type I                                                   | CDO1                       | -7,94  | Cytoplasm       |
| 1370808_at   | J03867    | cytochrome b5 reductase 3                                                      | CYB5R3                     | -4,38  | Cytoplasm       |
| 1371837_at   | AA851926  | DEAD (Asp-Glu-Ala-Asp) box polypeptide 5                                       | DDX5                       | -1,74  | Nucleus         |
| 1391463_at   | AI575264  | DEAD (Asp-Glu-Ala-Asp) box polypeptide 58                                      | DDX58                      | 8,93   | Cytoplasm       |
| 1383635_at   | BM385099  | DEAD (Asp-Glu-Ala-Asp) box polypeptide 59                                      | DDX59                      | -2,12  | Unknown         |
| 1381556_at   | BI303853  | DEAD (Asp-Glu-Ala-Asp) box polypeptide 60                                      | DDX60                      | 79,30  | Unknown         |
| 1389407_at   | BE099453  | dehydrogenase/reductase (SDR family) member 1                                  | DHRS1                      | -3,40  | Cytoplasm       |
| 1370814_at   | AB062758  | dehydrogenase/reductase (SDR family) member 4                                  | DHRS4                      | -3,28  | Cytoplasm       |
| 1387865_at   | AI411157  | deoxyuridine triphosphatase                                                    | DUT (includes EG:497778)   | -3,58  | Unknown         |
| 1385481_at   | AW526551  | dermatan sulfate epimerase-like                                                | DSEL                       | -2,94  | Unknown         |
| 1385277_x_at | AA818849  | DEXH (Asp-Glu-X-His) box polypeptide 58                                        | DHX58                      | 6,50   | Cytoplasm       |
| 1385439_x_at | BF417541  | DEXH (Asp-Glu-X-His) box polypeptide 58                                        | DHX58                      | 15,52  | Cytoplasm       |
| 1385276_a_at | AA818849  | DEXH (Asp-Glu-X-His) box polypeptide 58                                        | DHX58                      | 18,55  | Cytoplasm       |
| 1382440_at   | AI410813  | diacylglycerol lipase, beta                                                    | DAGLB                      | -2,21  | Unknown         |
| 1384788_at   | BF393298  | diacylglycerol lipase, beta                                                    | DAGLB                      | -2,02  | Unknown         |
| 1367909_at   | NM_134387 | dicarbonyl/L-xylulose reductase                                                | DCXR                       | -4,16  | Cytoplasm       |
| 1382348_at   | AI230216  | dihydroorotate dehydrogenase                                                   | DHODH                      | -1,88  | Cytoplasm       |
| 1392678_a_at | AA956455  | DNA (cytosine-5-)-methyltransferase 3 alpha                                    | DNMT3A                     | 2,82   | Nucleus         |
| 1374300_at   | AA997139  | ectonucleoside triphosphate diphosphohydrolase 4                               | ENTPD4                     | -2,01  | Cytoplasm       |
| 1382434_at   | AI059015  | ectonucleoside triphosphate diphosphohydrolase 5                               | ENTPD5                     | -1,50  | Cytoplasm       |
| 1373912_at   | AI170859  | ectonucleotide pyrophosphatase/phosphodiesterase 4 (putative function)         | ENPP4                      | 3,34   | Unknown         |
| 1374399_at   | AA801107  | EH-domain containing 4                                                         | EHD4                       | 4,56   | Plasma Membrane |
| 1372106_at   | BI284307  | EH-domain containing 4                                                         | EHD4                       | 7,20   | Plasma Membrane |
| 1391534_at   | BG666735  | elongation of very long chain fatty acids (FEN1/Elo2, SUR4/Elo3, yeast)-like 2 | ELOVL2                     | -2,63  | Cytoplasm       |
| 1391462_at   | AI179635  | emopamil binding protein-like                                                  | EBPL                       | -2,03  | Cytoplasm       |
| 1372592_at   | AI411391  | ES cell expressed Ras                                                          | ERAS                       | -2,17  | Plasma Membrane |
| 1368717_at   | NM_024132 | fatty acid amide hydrolase                                                     | FAAH                       | -1,84  | Plasma Membrane |
| 1367857_at   | NM_053445 | fatty acid desaturase 1                                                        | FADS1                      | -4,71  | Plasma Membrane |
| 1389320_at   | BF419881  | F-box protein 25                                                               | FBXO25                     | -2,25  | Unknown         |
| 1388470_at   | AA892772  | F-box protein 9                                                                | FBXO9                      | -1,97  | Cytoplasm       |
| 1384344_at   | AI060231  | FK506 binding protein 7                                                        | FKBP7                      | -2,65  | Cytoplasm       |
| 1367670_at   | NM_017005 | fumarate hydratase                                                             | FH                         | -2,93  | Cytoplasm       |
| 1372676_at   | BI275774  | fumarylacetoacetate hydrolase domain containing 1                              | FAHD1                      | -2,84  | Cytoplasm       |
| 1379556_a_at | AI105210  | geranylgeranyl diphosphate synthase 1                                          | GGPS1                      | 1,54   | Cytoplasm       |
| 1373669_at   | BG374650  | glucosamine-6-phosphate deaminase 2                                            | GNPDA2                     | 3,53   | Unknown         |
| 1374903_at   | AI234819  | glucosaminyl (N-acetyl) transferase 2, I-branching enzyme (I blood group)      | GCNT2                      | 6,63   | Cytoplasm       |
| 1367856_at   | NM_017006 | glucose-6-phosphate dehydrogenase                                              | G6PD                       | -1,57  | Cytoplasm       |
| 1367901_at   | NM_017015 | glucuronidase, beta                                                            | GUSB                       | -2,71  | Cytoplasm       |
| 1368344_at   | NM_017007 | glutamate decarboxylase 1 (brain, 67kDa)                                       | GAD1                       | -2,14  | Cytoplasm       |
| 1377761_at   | BI296057  | glutamine-fructose-6-phosphate transaminase 2                                  | GFPT2                      | 6,51   | Unknown         |
| 1367705_at   | AF319950  | glutaredoxin (thioltransferase)                                                | GLRX                       | -4,29  | Cytoplasm       |
| 1367774_at   | NM_031509 | glutathione S-transferase alpha 1                                              | GSTA1                      | -1,72  | Cytoplasm       |
| 1387023_at   | NM_031154 | glutathione S-transferase mu 2 (muscle)                                        | GSTM2                      | -2,66  | Cytoplasm       |
| 1370365_at   | L38615    | glutathione synthetase                                                         | GSS                        | -2,18  | Cytoplasm       |
| 1368890_at   | NM_053410 | glyceronephosphate O-acyltransferase                                           | GNPAT                      | -1,73  | Cytoplasm       |
| 1388715_at   | AA818089  | glycyl-tRNA synthetase                                                         | GARS                       | -2,23  | Cytoplasm       |
| 1373337_at   | AI412065  | glyoxylate reductase/hydroxypyruvate reductase                                 | GRHPR                      | -3,58  | Cytoplasm       |
| 1387906_a_at | AF107845  | GNAS complex locus                                                             | GNAS                       | -2,03  | Plasma Membrane |
| 1374489_at   | BF282573  | GTP binding protein 2                                                          | GTPBP2                     | 2,71   | Unknown         |
| 1382351_at   | AI069972  | GTP binding protein overexpressed in skeletal muscle                           | GEM                        | -2,74  | Plasma Membrane |
| 1368332_at   | NM_133624 | guanylate binding protein 2, interferon-inducible                              | GBP2                       | 504,10 | Cytoplasm       |
| 1385051_at   | BE108569  | guanylate binding protein 4                                                    | GBP4 (includes EG:115361)  | 127,69 | Cytoplasm       |
| 1382902_at   | AA943147  | hect domain and RLD 6                                                          | HERC6                      | 19,63  | Unknown         |

|              |           |                                                                                                                                          |          |        |                     |
|--------------|-----------|------------------------------------------------------------------------------------------------------------------------------------------|----------|--------|---------------------|
| 1370237_at   | AA799574  | hydroxyacyl-Coenzyme A dehydrogenase                                                                                                     | HADH     | -4,88  | Cytoplasm           |
| 1373924_at   | AI712686  | hypothetical protein FLJ11151                                                                                                            | FLJ11151 | -2,57  | Unknown             |
| 1371817_at   | BI285489  | inositol-3-phosphate synthase 1                                                                                                          | ISYNA1   | -1,71  | Unknown             |
| 1396163_at   | BF563316  | interferon gamma induced GTPase                                                                                                          | IGTP     | 4,54   | Cytoplasm           |
| 1376151_a_at | AI407953  | interferon gamma induced GTPase                                                                                                          | IGTP     | 26,91  | Cytoplasm           |
| 1375796_at   | BI300770  | interferon gamma induced GTPase                                                                                                          | IGTP     | 32,18  | Cytoplasm           |
| 1397304_at   | AW525366  | interferon gamma induced GTPase                                                                                                          | IGTP     | 171,65 | Cytoplasm           |
| 1377950_at   | AA955213  | interferon inducible GTPase 1                                                                                                            | IIGP1    | 63,41  | Unknown             |
| 1373992_at   | AI408440  | interferon inducible GTPase 1                                                                                                            | IIGP1    | 140,49 | Unknown             |
| 1390507_at   | BI296097  | interferon stimulated exonuclease gene 20kDa                                                                                             | ISG20    | 2,40   | Nucleus             |
| 1370865_at   | BI277627  | isocitrate dehydrogenase 3 (NAD+) gamma                                                                                                  | IDH3G    | -1,64  | Cytoplasm           |
| 1382462_at   | BF290937  | L-2-hydroxyglutarate dehydrogenase                                                                                                       | L2HGDH   | -2,87  | Cytoplasm           |
| 1370218_at   | AA848319  | lactate dehydrogenase B                                                                                                                  | LDHB     | -3,35  | Cytoplasm           |
| 1383743_at   | BI275464  | leucine rich repeat containing 16A                                                                                                       | LRRC16A  | 1,67   | Unknown             |
| 1381190_at   | AI598833  | LIM domain 7                                                                                                                             | LMO7     | -2,68  | Cytoplasm           |
| 1371662_at   | AA892250  | lysyl-tRNA synthetase                                                                                                                    | KARS     | 2,75   | Cytoplasm           |
| 1374696_at   | AI170182  | mannosidase, alpha, class 1A, member 2                                                                                                   | MAN1A2   | 2,13   | Cytoplasm           |
| 1377463_at   | BE099244  | mannosidase, alpha, class 2A, member 2                                                                                                   | MAN2A2   | 1,93   | Cytoplasm           |
| 1371875_at   | BM388852  | mannosidase, beta A, lysosomal                                                                                                           | MANBA    | 2,46   | Cytoplasm           |
| 1367796_at   | NM_030861 | mannosyl (alpha-1,3-)-glycoprotein beta-1,2-N-acetylglucosaminyltransferase                                                              | MGAT1    | -2,01  | Cytoplasm           |
| 1383025_at   | BE097791  | meningioma expressed antigen 5 (hyaluronidase)                                                                                           | MGEA5    | 2,69   | Unknown             |
| 1370129_at   | NM_131904 | meningioma expressed antigen 5 (hyaluronidase)                                                                                           | MGEA5    | 3,23   | Unknown             |
| 1371031_at   | AI454484  | methionine adenosyltransferase I, alpha                                                                                                  | MAT1A    | 2,34   | Cytoplasm           |
| 1371350_at   | AI412159  | methionine adenosyltransferase II, alpha                                                                                                 | MAT2A    | -1,59  | Cytoplasm           |
| 1377060_at   | AI410674  | methylcrotonoyl-Coenzyme A carboxylase 2 (beta)                                                                                          | MCCC2    | -2,14  | Cytoplasm           |
| 1368181_at   | NM_022508 | methylenetetrahydrofolate dehydrogenase (NADP+ dependent) 1, methylenetetrahydrofolate cyclohydrolase, formyltetrahydrofolate synthetase | MTHFD1   | 3,34   | Cytoplasm           |
| 1367541_at   | BE113965  | methyltransferase like 5                                                                                                                 | METTL5   | -1,59  | Unknown             |
| 1377041_at   | AA891664  | MFNG O-fucosylpeptide 3-beta-N-acetylglucosaminyltransferase                                                                             | MFNG     | -4,16  | Cytoplasm           |
| 1374062_x_at | AA946204  | microtubule-associated protein, RP/EB family, member 3                                                                                   | MAPRE3   | -2,73  | Cytoplasm           |
| 1388744_at   | AI599678  | minichromosome maintenance complex component 7                                                                                           | MCM7     | -2,96  | Nucleus             |
| 1393287_at   | AW915147  | Mov10, Moloney leukemia virus 10, homolog (mouse)                                                                                        | MOV10    | 1,92   | Nucleus             |
| 1374725_at   | AW252811  | Mov10, Moloney leukemia virus 10, homolog (mouse)                                                                                        | MOV10    | 32,94  | Nucleus             |
| 1372863_at   | BF409872  | MYC binding protein 2                                                                                                                    | MYCBP2   | 1,79   | Nucleus             |
| 1390423_at   | BE104245  | MYC binding protein 2                                                                                                                    | MYCBP2   | 1,90   | Nucleus             |
| 1387866_at   | AI178160  | myosin IXB                                                                                                                               | MYO9B    | 6,12   | Cytoplasm           |
| 1389474_at   | AA818380  | myosin regulatory light chain interacting protein                                                                                        | MYLIP    | -1,68  | Cytoplasm           |
| 1371725_at   | BM392410  | myosin, heavy chain 9, non-muscle                                                                                                        | MYH9     | 2,57   | Cytoplasm           |
| 1387283_at   | NM_134350 | myxovirus (influenza virus) resistance 1, interferon-inducible protein p78 (mouse)                                                       | MX1      | 2,68   | Nucleus             |
| 1369202_at   | NM_017028 | myxovirus (influenza virus) resistance 1, interferon-inducible protein p78 (mouse)                                                       | MX1      | 21,17  | Nucleus             |
| 1371015_at   | X52711    | myxovirus (influenza virus) resistance 2 (mouse)                                                                                         | MX2      | 7,25   | Nucleus             |
| 1368208_at   | NM_133558 | N-acetyltransferase 8B (GCN5-related, putative, gene/pseudogene)                                                                         | NAT8B    | -2,28  | Unknown             |
| 1374959_at   | AA945624  | NAD(P)H dehydrogenase, quinone 2                                                                                                         | NQO2     | 6,20   | Cytoplasm           |
| 1391126_at   | BG379351  | NADH dehydrogenase (ubiquinone) 1 alpha subcomplex, 12                                                                                   | NDUFA12  | -3,59  | Cytoplasm           |
| 1387859_at   | AI410876  | NFS1 nitrogen fixation 1 homolog (S. cerevisiae)                                                                                         | NFS1     | -1,65  | Cytoplasm           |
| 1387667_at   | L12562    | nitric oxide synthase 2, inducible                                                                                                       | NOS2     | 374,97 | Cytoplasm           |
| 1368410_at   | NM_012601 | N-methylpurine-DNA glycosylase                                                                                                           | MPG      | -2,77  | Nucleus             |
| 1372295_at   | BF551356  | nuclear prelamin A recognition factor                                                                                                    | NARF     | -2,02  | Nucleus             |
| 1376118_at   | BE109604  | OTU domain, ubiquitin aldehyde binding 2                                                                                                 | OTUB2    | -2,80  | Unknown             |
| 1375848_at   | BG668051  | paraoxonase 2                                                                                                                            | PON2     | -2,77  | Extracellular Space |
| 1371863_at   | BM387059  | phosphatidylglycerophosphate synthase 1                                                                                                  | PGS1     | 3,42   | Cytoplasm           |
| 1398309_at   | D88364    | phosphatidylinositol glycan anchor biosynthesis, class L                                                                                 | PIGL     | -2,01  | Cytoplasm           |
| 1372900_at   | BI274156  | phosphatidylinositol glycan anchor biosynthesis, class T                                                                                 | PIGT     | -2,37  | Cytoplasm           |
| 1368438_at   | NM_022236 | phosphodiesterase 10A                                                                                                                    | PDE10A   | -2,38  | Cytoplasm           |
| 1374157_at   | AA858930  | phosphodiesterase 4B, cAMP-specific (phosphodiesterase E4 dunce homolog, Drosophila)                                                     | PDE4B    | 4,85   | Cytoplasm           |
| 1370569_at   | BF565001  | phosphodiesterase 4D, cAMP-specific (phosphodiesterase E3 dunce homolog, Drosophila)                                                     | PDE4D    | -1,78  | Cytoplasm           |
| 1371044_at   | BF410284  | phosphodiesterase 7A                                                                                                                     | PDE7A    | 1,64   | Cytoplasm           |
| 1368128_at   | NM_031598 | phospholipase A2, group IIA (platelets, synovial fluid)                                                                                  | PLA2G2A  | 4,05   | Extracellular Space |
| 1370385_at   | U51898    | phospholipase A2, group VI (cytosolic, calcium-independent)                                                                              | PLA2G6   | 2,18   | Cytoplasm           |

|              |           |                                                                                                                            |         |         |                 |
|--------------|-----------|----------------------------------------------------------------------------------------------------------------------------|---------|---------|-----------------|
| 1392099_at   | AI549022  | phospholipase C, eta 1                                                                                                     | PLCH1   | 7,88    | Cytoplasm       |
| 1370531_a_at | U69550    | phospholipase D1, phosphatidylcholine-specific                                                                             | PLD1    | 2,43    | Cytoplasm       |
| 1369029_at   | NM_057194 | phospholipid scramblase 1                                                                                                  | PLSCR1  | 6,28    | Plasma Membrane |
| 1388641_at   | AI410319  | phosphoribosylglycinamide formyltransferase, phosphoribosylglycinamide synthetase, phosphoribosylaminoimidazole synthetase | GART    | -2,80   | Cytoplasm       |
| 1376001_at   | BG380440  | polymerase (RNA) I polypeptide E, 53kDa                                                                                    | POLR1E  | -1,59   | Nucleus         |
| 1382604_at   | BE117925  | polymerase (RNA) III (DNA directed) polypeptide G (32kD)                                                                   | POLR3G  | -2,47   | Nucleus         |
| 1370407_at   | AF332142  | prenylcysteine oxidase 1                                                                                                   | PCYOX1  | -2,46   | Cytoplasm       |
| 1389336_at   | BM390893  | processing of precursor 5, ribonuclease P/MRP subunit (S. cerevisiae)                                                      | POP5    | -2,53   | Nucleus         |
| 1371963_at   | BF395042  | propionyl Coenzyme A carboxylase, alpha polypeptide                                                                        | PCCA    | -1,51   | Cytoplasm       |
| 1368259_at   | NM_017043 | prostaglandin-endoperoxide synthase 1 (prostaglandin G/H synthase and cyclooxygenase)                                      | PTGS1   | 4,58    | Cytoplasm       |
| 1368527_at   | U03389    | prostaglandin-endoperoxide synthase 2 (prostaglandin G/H synthase and cyclooxygenase)                                      | PTGS2   | 6,36    | Cytoplasm       |
| 1374424_at   | BE112720  | protein arginine methyltransferase 5                                                                                       | PRMT5   | -1,71   | Cytoplasm       |
| 1388717_at   | BM384163  | protein O-fucosyltransferase 2                                                                                             | POFUT2  | -3,87   | Cytoplasm       |
| 1375916_at   | AA955163  | protein-L-isoaspartate (D-aspartate) O-methyltransferase domain containing 2                                               | PCMTD2  | -1,87   | Cytoplasm       |
| 1374454_at   | BM388557  | protein-L-isoaspartate (D-aspartate) O-methyltransferase domain containing 2                                               | PCMTD2  | -1,68   | Cytoplasm       |
| 1371871_at   | AI409731  | RAB12, member RAS oncogene family                                                                                          | RAB12   | 1,99    | Cytoplasm       |
| 1383089_at   | BM386264  | RAB21, member RAS oncogene family                                                                                          | RAB21   | 1,59    | Cytoplasm       |
| 1370181_at   | BF281403  | RAB4A, member RAS oncogene family                                                                                          | RAB4A   | -2,30   | Cytoplasm       |
| 1391347_at   | BF398743  | RAB8B, member RAS oncogene family                                                                                          | RAB8B   | 7,18    | Cytoplasm       |
| 1370913_at   | AI409634  | radical S-adenosyl methionine domain containing 2                                                                          | RSAD2   | 1019,52 | Unknown         |
| 1368217_at   | NM_032067 | ralA binding protein 1                                                                                                     | RALBP1  | 1,54    | Cytoplasm       |
| 1392922_at   | BE116619  | RAP2B, member of RAS oncogene family                                                                                       | RAP2B   | 1,65    | Plasma Membrane |
| 1371659_at   | AA891940  | ras homolog gene family, member C                                                                                          | RHOC    | 2,85    | Plasma Membrane |
| 1387908_at   | AF239157  | RAS, dexamethasone-induced 1                                                                                               | RASD1   | 8,69    | Cytoplasm       |
| 1376881_at   | AW528057  | Ras-related GTP binding B                                                                                                  | RRAGB   | -4,92   | Nucleus         |
| 1369696_at   | NM_053972 | Ras-related GTP binding B                                                                                                  | RRAGB   | -2,94   | Nucleus         |
| 1368373_at   | NM_019343 | regulator of G-protein signaling 7                                                                                         | RGS7    | -1,65   | Cytoplasm       |
| 1368500_a_at | NM_019224 | regulator of G-protein signaling 9                                                                                         | RGS9    | 2,04    | Cytoplasm       |
| 1374921_at   | BI274548  | regulator of telomere elongation helicase 1                                                                                | RTEL1   | -2,68   | Nucleus         |
| 1393351_at   | BE109501  | retinol dehydrogenase 10 (all-trans)                                                                                       | RDH10   | 10,54   | Unknown         |
| 1373923_at   | BF283756  | retinol dehydrogenase 10 (all-trans)                                                                                       | RDH10   | 10,56   | Unknown         |
| 1384391_at   | BE096510  | retinol dehydrogenase 10 (all-trans)                                                                                       | RDH10   | 14,84   | Unknown         |
| 1398494_at   | BF404279  | REV1 homolog (S. cerevisiae)                                                                                               | REV1    | 1,91    | Nucleus         |
| 1376066_at   | AI103572  | Rho family GTPase 3                                                                                                        | RND3    | 6,49    | Cytoplasm       |
| 1386062_at   | AI060227  | Rho family GTPase 3                                                                                                        | RND3    | 7,60    | Cytoplasm       |
| 1389632_at   | AA799294  | Rho-related BTB domain containing 1                                                                                        | RHOBTB1 | -2,09   | Unknown         |
| 1389003_at   | BI282008  | Rho-related BTB domain containing 3                                                                                        | RHOBTB3 | -4,81   | Unknown         |
| 1376440_at   | BF391522  | ring finger protein 139                                                                                                    | RNF139  | 2,63    | Cytoplasm       |
| 1393193_at   | BF522381  | RNA pseudouridylate synthase domain containing 2                                                                           | RPUSD2  | -2,59   | Unknown         |
| 1379957_at   | BE107457  | schlafen family member 13                                                                                                  | SLFN13  | 22,60   | Nucleus         |
| 1374524_at   | BM384384  | selenocysteine lyase                                                                                                       | SCLY    | 4,52    | Cytoplasm       |
| 1393134_at   | BG375377  | selenophosphate synthetase 1                                                                                               | SEPHS1  | -2,31   | Unknown         |
| 1393256_at   | AI137711  | selenophosphate synthetase 1                                                                                               | SEPHS1  | -2,23   | Unknown         |
| 1374457_at   | AI180194  | serine palmitoyltransferase, long chain base subunit 2                                                                     | SPTLC2  | 1,82    | Cytoplasm       |
| 1390096_at   | BF284481  | SH3-domain GRB2-like endophilin B1                                                                                         | SH3GLB1 | 1,68    | Cytoplasm       |
| 1381203_at   | AA819246  | SH3-domain GRB2-like endophilin B1                                                                                         | SH3GLB1 | 2,59    | Cytoplasm       |
| 1374007_at   | AI178499  | SLU7 splicing factor homolog (S. cerevisiae)                                                                               | SLU7    | -1,89   | Nucleus         |
| 1398420_at   | BF393807  | SMAD specific E3 ubiquitin protein ligase 2                                                                                | SMURF2  | 1,64    | Cytoplasm       |
| 1371774_at   | AA893220  | spermidine/spermine N1-acetyltransferase 1                                                                                 | SAT1    | 2,23    | Cytoplasm       |
| 1374442_at   | AI227831  | splicing factor, arginine/serine-rich 9                                                                                    | SFRS9   | -1,52   | Nucleus         |
| 1370420_at   | J05035    | steroid-5-alpha-reductase, alpha polypeptide 1 (3-oxo-5 alpha-steroid delta 4-dehydrogenase alpha 1)                       | SRD5A1  | -1,56   | Cytoplasm       |
| 1384331_at   | H31896    | sulfiredoxin 1 homolog (S. cerevisiae)                                                                                     | SRXN1   | -2,70   | Cytoplasm       |
| 1370173_at   | BG671549  | superoxide dismutase 2, mitochondrial                                                                                      | SOD2    | 6,74    | Cytoplasm       |
| 1370172_at   | AA892254  | superoxide dismutase 2, mitochondrial                                                                                      | SOD2    | 8,69    | Cytoplasm       |
| 1375981_a_at | AA997899  | suppressor of variegation 3-9 homolog 1 (Drosophila)                                                                       | SUV39H1 | 1,95    | Nucleus         |
| 1372008_at   | BM385175  | tafazzin                                                                                                                   | TAZ     | -2,41   | Nucleus         |
| 1398953_at   | BM386183  | tissue specific transplantation antigen P35B                                                                               | TSTA3   | -1,62   | Plasma Membrane |
| 1374467_at   | BM389034  | TNF receptor-associated protein 1                                                                                          | TRAP1   | -3,44   | Cytoplasm       |

|                                   |           |                                                                     |                             |       |                     |
|-----------------------------------|-----------|---------------------------------------------------------------------|-----------------------------|-------|---------------------|
| 1372868_at                        | BF284295  | torsin family 3, member A                                           | TOR3A                       | 1,74  | Unknown             |
| 1383171_at                        | BG373674  | transcription factor B2, mitochondrial                              | TFB2M                       | -2,76 | Cytoplasm           |
| 1383430_at                        | BF414509  | tRNA splicing endonuclease 2 homolog (S. cerevisiae)                | TSEN2                       | -2,05 | Cytoplasm           |
| 1388574_at                        | BG670966  | tryptophanyl-tRNA synthetase                                        | WARS                        | 4,08  | Cytoplasm           |
| 1395124_at                        | BE101688  | tryptophanyl-tRNA synthetase                                        | WARS                        | 15,25 | Cytoplasm           |
| 1398994_at                        | BI301193  | tyrosylprotein sulfotransferase 2                                   | TPST2                       | -2,19 | Cytoplasm           |
| 1376862_at                        | BI296848  | ubiquitination factor E4B (UFD2 homolog, yeast)                     | UBE4B                       | -2,16 | Cytoplasm           |
| 1373037_at                        | BI279216  | ubiquitin-conjugating enzyme E2L 6                                  | UBE2L6                      | 12,83 | Cytoplasm           |
| 1373438_at                        | BE329352  | ubiquitin-conjugating enzyme E2O                                    | UBE2O                       | -1,58 | Unknown             |
| 1379633_a_at                      | BE096453  | ubiquitin-like modifier activating enzyme 7                         | UBA7                        | 5,17  | Cytoplasm           |
| 1368858_at                        | L21698    | UDP glycosyltransferase 8                                           | UGT8                        | -3,69 | Cytoplasm           |
| 1389246_at                        | BF282414  | UDP-Gal:betaGlcNAc beta 1,4- galactosyltransferase, polypeptide 1   | B4GALT1                     | 1,85  | Cytoplasm           |
| 1387206_at                        | NM_031740 | UDP-Gal:betaGlcNAc beta 1,4- galactosyltransferase, polypeptide 6   | B4GALT6                     | 1,64  | Cytoplasm           |
| 1376202_at                        | BF416236  | UDP-GlcNAc:betaGal beta-1,3-N-acetylglucosaminyltransferase 1       | B3GNT1                      | -4,78 | Cytoplasm           |
| 1367938_at                        | NM_031325 | UDP-glucose dehydrogenase                                           | UGDH                        | 2,11  | Nucleus             |
| 1389587_at                        | BM384966  | uridine monophosphate synthetase                                    | UMPS                        | -2,19 | Cytoplasm           |
| 1372905_at                        | AW433888  | vinculin                                                            | VCL                         | 1,52  | Plasma Membrane     |
| 1368839_at                        | AI407433  | Wolfram syndrome 1 (wolframin)                                      | WFS1                        | -2,08 | Cytoplasm           |
| <b>G-protein coupled receptor</b> |           |                                                                     |                             |       |                     |
| 1369787_at                        | NM_012688 | cholecystokinin A receptor                                          | CCKAR                       | -4,37 | Plasma Membrane     |
| 1382739_at                        | AI045718  | G protein-coupled receptor 19                                       | GPR19                       | 4,26  | Plasma Membrane     |
| 1369792_at                        | U12006    | G protein-coupled receptor 6                                        | GPR6                        | -7,38 | Plasma Membrane     |
| 1387702_at                        | U30290    | galanin receptor 1                                                  | GALR1                       | -2,42 | Plasma Membrane     |
| 1368481_at                        | NM_012714 | gastric inhibitory polypeptide receptor                             | GIPR                        | -1,80 | Plasma Membrane     |
| 1370522_at                        | L04796    | glucagon receptor                                                   | GCGR                        | 2,69  | Plasma Membrane     |
| 1374196_at                        | AI710389  | LanC lantibiotic synthetase component C-like 1 (bacterial)          | LANCL1                      | -2,12 | Plasma Membrane     |
| 1373431_at                        | AI101427  | leucine rich repeat containing 8 family, member D                   | LRRC8D                      | 1,68  | Plasma Membrane     |
| 1387177_at                        | NM_017238 | vasoactive intestinal peptide receptor 2                            | VIPR2                       | -2,87 | Plasma Membrane     |
| 1375846_at                        | BE113490  | xenotropic and polytropic retrovirus receptor                       | XPR1                        | 2,06  | Plasma Membrane     |
| <b>Growth factor</b>              |           |                                                                     |                             |       |                     |
| 1368325_at                        | NM_012842 | epidermal growth factor (beta-urogastrone)                          | EGF                         | 1,73  | Extracellular Space |
| 1386893_at                        | NM_017113 | granulin                                                            | GRN                         | 2,41  | Extracellular Space |
| 1383047_at                        | AA957335  | growth arrest-specific 6                                            | GAS6                        | -2,28 | Extracellular Space |
| 1374706_at                        | BF407916  | growth differentiation factor 11                                    | GDF11                       | -1,77 | Extracellular Space |
| 1370427_at                        | L06238    | platelet-derived growth factor alpha polypeptide                    | PDGFA                       | 6,64  | Extracellular Space |
| 1379375_at                        | BE100812  | platelet-derived growth factor alpha polypeptide                    | PDGFA                       | 8,60  | Extracellular Space |
| 1368359_a_at                      | NM_030997 | VGF nerve growth factor inducible                                   | VGF                         | 1,94  | Extracellular Space |
| <b>Ion channel</b>                |           |                                                                     |                             |       |                     |
| 1387171_at                        | NM_017261 | glutamate receptor, ionotropic, AMPA 2                              | GRIA2                       | -2,72 | Plasma Membrane     |
| 1370408_at                        | AF313411  | MSTP150                                                             | MST150                      | 4,23  | Unknown             |
| 1391546_at                        | AI412209  | potassium voltage-gated channel, KQT-like subfamily, member 2       | KCNQ2                       | -4,46 | Plasma Membrane     |
| 1369043_at                        | NM_012971 | potassium voltage-gated channel, shaker-related subfamily, member 4 | KCNA4                       | 1,84  | Plasma Membrane     |
| 1375905_at                        | AI412746  | tweety homolog 1 (Drosophila)                                       | TTYH1                       | 1,60  | Unknown             |
| 1398578_at                        | AI102019  | tweety homolog 1 (Drosophila)                                       | TTYH1                       | 1,96  | Unknown             |
| 1370358_at                        | AB018253  | two pore segment channel 1                                          | TPCN1                       | 1,84  | Plasma Membrane     |
| 1376313_at                        | BI296463  | two pore segment channel 2                                          | TPCN2                       | 2,21  | Unknown             |
| <b>Kinase</b>                     |           |                                                                     |                             |       |                     |
| 1371850_at                        | AA892829  | 3'-phosphoadenosine 5'-phosphosulfate synthase 1                    | PAPSS1 (includes EG:295443) | -2,15 | Unknown             |
| 1374958_at                        | AA819640  | ADP-dependent glucokinase                                           | ADPGK                       | -2,50 | Unknown             |
| 1373494_at                        | BE120831  | breakpoint cluster region                                           | BCR                         | 2,63  | Cytoplasm           |
| 1372351_at                        | AI229448  | bromodomain containing 4                                            | BRD4                        | 1,67  | Nucleus             |
| 1367889_at                        | NM_134468 | calcium/calmodulin-dependent protein kinase I                       | CAMK1                       | -2,22 | Cytoplasm           |
| 1391229_at                        | BG381458  | calcium/calmodulin-dependent protein kinase IG                      | CAMK1G                      | -2,61 | Cytoplasm           |
| 1375575_at                        | BF403410  | calcium/calmodulin-dependent protein kinase II beta                 | CAMK2B                      | -1,53 | Cytoplasm           |
| 1368834_at                        | AA894330  | calcium/calmodulin-dependent protein kinase II delta                | CAMK2D                      | 2,11  | Cytoplasm           |
| 1373823_at                        | AA944180  | CDC28 protein kinase regulatory subunit 2                           | CKS2 (includes EG:1164)     | 15,39 | Unknown             |
| 1372536_at                        | AI105042  | chaperone, ABC1 activity of bc1 complex homolog (S. pombe)          | CABC1                       | -3,19 | Cytoplasm           |
| 1390566_a_at                      | BI301453  | creatine kinase, mitochondrial 1B                                   | CKMT1B                      | 6,60  | Cytoplasm           |

|              |           |                                                                                                    |
|--------------|-----------|----------------------------------------------------------------------------------------------------|
| 1398622_at   | AI703807  | cysteine rich transmembrane BMP regulator 1 (chordin-like)                                         |
| 1383424_at   | BI276216  | cytidine monophosphate (UMP-CMP) kinase 2, mitochondrial                                           |
| 1393044_at   | BF282370  | cytidine monophosphate (UMP-CMP) kinase 2, mitochondrial                                           |
| 1397439_at   | AI101639  | diacylglycerol kinase, epsilon 64kDa                                                               |
| 1369686_at   | U78857    | doublecortin-like kinase 1                                                                         |
| 1374143_at   | AI602491  | EPH receptor A2                                                                                    |
| 1370699_a_at | AF187818  | epidermal growth factor receptor (erythroblastic leukemia viral (v-erb-b) oncogene homolog, avian) |
| 1387242_at   | NM_019335 | eukaryotic translation initiation factor 2-alpha kinase 2                                          |
| 1368326_at   | NM_031599 | eukaryotic translation initiation factor 2-alpha kinase 3                                          |
| 1383654_a_at | BE112523  | fructosamine 3 kinase                                                                              |
| 1387312_a_at | NM_012565 | glucokinase (hexokinase 4)                                                                         |
| 1369162_at   | NM_013170 | guanylate cyclase 2C (heat stable enterotoxin receptor)                                            |
| 1388721_at   | BG380282  | heat shock 22kDa protein 8                                                                         |
| 1383519_at   | BI294137  | hexokinase 2                                                                                       |
| 1373379_at   | BF396350  | interleukin-1 receptor-associated kinase 1                                                         |
| 1368856_at   | NM_031514 | Janus kinase 2 (a protein tyrosine kinase)                                                         |
| 1380110_at   | AI229643  | Janus kinase 2 (a protein tyrosine kinase)                                                         |
| 1390207_at   | BM390283  | LATS, large tumor suppressor, homolog 2 (Drosophila)                                               |
| 1368710_at   | NM_021699 | MAP/microtubule affinity-regulating kinase 2                                                       |
| 1376176_at   | AI145586  | microtubule associated serine/threonine kinase 3                                                   |
| 1390905_at   | AW533482  | microtubule associated serine/threonine kinase family member 4                                     |
| 1398834_at   | D14592    | mitogen-activated protein kinase kinase 2                                                          |
| 1369393_at   | NM_053847 | mitogen-activated protein kinase kinase kinase 8                                                   |
| 1373864_at   | BM388810  | mitogen-activated protein kinase kinase kinase kinase 4                                            |
| 1369000_at   | NM_021589 | neurotrophic tyrosine kinase, receptor, type 1                                                     |
| 1370446_at   | AF202049  | non-metastatic cells 7, protein expressed in (nucleoside-diphosphate kinase)                       |
| 1383614_at   | BI295051  | NUAK family, SNF1-like kinase, 2                                                                   |
| 1375213_at   | BM384604  | phosphoenolpyruvate carboxykinase 2 (mitochondrial)                                                |
| 1372182_at   | BM389769  | phosphofructokinase, platelet                                                                      |
| 1369050_at   | NM_053923 | phosphoinositide-3-kinase, class 2, gamma polypeptide                                              |
| 1389723_at   | AI172265  | phosphoinositide-3-kinase, regulatory subunit 4                                                    |
| 1389431_at   | BF400782  | protein kinase, DNA-activated, catalytic polypeptide                                               |
| 1377053_at   | BE117757  | protein kinase-like protein SgK196                                                                 |
| 1372316_at   | BM384131  | protein kinase-like protein SgK493                                                                 |
| 1382646_at   | AI145475  | PRP4 pre-mRNA processing factor 4 homolog B (yeast)                                                |
| 1369688_s_at | U69109    | PTK2B protein tyrosine kinase 2 beta                                                               |
| 1372229_at   | AI179119  | pyruvate dehydrogenase kinase, isozyme 3                                                           |
| 1368651_at   | M17685    | pyruvate kinase, liver and RBC                                                                     |
| 1381279_at   | BF412519  | receptor-interacting serine-threonine kinase 2                                                     |
| 1368596_at   | NM_021693 | salt-inducible kinase 1                                                                            |
| 1367802_at   | NM_019232 | serum/glucocorticoid regulated kinase 1                                                            |
| 1388462_at   | AI407506  | SH3-binding domain kinase 1                                                                        |
| 1376880_at   | AI639447  | TANK-binding kinase 1                                                                              |
| 1380164_at   | AI411787  | thymidine kinase 2, mitochondrial                                                                  |
| 1370940_at   | BG378746  | tight junction protein 2 (zona occludens 2)                                                        |
| 1382114_at   | BG379991  | tousled-like kinase 1                                                                              |
| 1383827_at   | AI059119  | tousled-like kinase 1                                                                              |
| 1390709_at   | AI102364  | triple functional domain (PTPRF interacting)                                                       |
| 1377651_at   | AI577848  | triple functional domain (PTPRF interacting)                                                       |

**Ligand-dependent nuclear receptor**

|            |          |                                                 |
|------------|----------|-------------------------------------------------|
| 1370816_at | M25804   | nuclear receptor subfamily 1, group D, member 1 |
| 1379397_at | BE106199 | RAR-related orphan receptor A                   |

**Peptidase**

|            |           |                                 |
|------------|-----------|---------------------------------|
| 1367922_at | NM_020306 | ADAM metallopeptidase domain 17 |
| 1373570_at | AI411240  | aminopeptidase-like 1           |
| 1396386_at | BF408665  | beta-site APP-cleaving enzyme 2 |
| 1387009_at | NM_019152 | calpain 1, (mu/I) large subunit |
| 1373466_at | AA946474  | calpastatin                     |

|         |        |                     |
|---------|--------|---------------------|
| CRIM1   | 2,64   | Extracellular Space |
| CMPK2   | 93,30  | Cytoplasm           |
| CMPK2   | 110,97 | Cytoplasm           |
| DGKE    | -2,23  | Cytoplasm           |
| DCLK1   | -3,23  | Cytoplasm           |
| EPHA2   | 2,53   | Plasma Membrane     |
| EGFR    | -1,96  | Plasma Membrane     |
| EIF2AK2 | 4,06   | Cytoplasm           |
| EIF2AK3 | 2,21   | Cytoplasm           |
| FN3K    | -6,16  | Unknown             |
| GCK     | -5,10  | Cytoplasm           |
| GUCY2C  | -3,26  | Plasma Membrane     |
| HSPB8   | 35,81  | Cytoplasm           |
| HK2     | 4,99   | Cytoplasm           |
| IRAK1   | -1,53  | Plasma Membrane     |
| JAK2    | 9,74   | Cytoplasm           |
| JAK2    | 12,28  | Cytoplasm           |
| LATS2   | -1,92  | Nucleus             |
| MARK2   | 1,61   | Cytoplasm           |
| MAST3   | -2,88  | Unknown             |
| MAST4   | 1,77   | Unknown             |
| MAP2K2  | -1,59  | Cytoplasm           |
| MAP3K8  | 7,73   | Cytoplasm           |
| MAP4K4  | 1,61   | Cytoplasm           |
| NTRK1   | -4,86  | Plasma Membrane     |
| NME7    | -1,80  | Unknown             |
| NUAK2   | 3,37   | Unknown             |
| PCK2    | -2,66  | Cytoplasm           |
| PFKP    | 4,98   | Cytoplasm           |
| PIK3C2G | 3,00   | Cytoplasm           |
| PIK3R4  | -3,44  | Cytoplasm           |
| PRKDC   | -1,66  | Nucleus             |
| SGK196  | -2,89  | Unknown             |
| SGK493  | 3,24   | Unknown             |
| PRPF4B  | -2,81  | Nucleus             |
| PTK2B   | 2,11   | Cytoplasm           |
| PDK3    | -4,78  | Cytoplasm           |
| PKLR    | -1,97  | Cytoplasm           |
| RIPK2   | 48,63  | Plasma Membrane     |
| SNF1LK  | -1,73  | Cytoplasm           |
| SGK1    | 2,88   | Cytoplasm           |
| SBK1    | 2,04   | Unknown             |
| TBK1    | 2,22   | Cytoplasm           |
| TK2     | 2,53   | Cytoplasm           |
| TJP2    | 3,92   | Plasma Membrane     |
| TLK1    | 1,51   | Cytoplasm           |
| TLK1    | 1,60   | Cytoplasm           |
| TRIO    | 2,39   | Plasma Membrane     |
| TRIO    | 3,01   | Plasma Membrane     |

|       |      |         |
|-------|------|---------|
| NR1D1 | 3,12 | Nucleus |
| RORA  | 3,48 | Nucleus |

|        |       |                 |
|--------|-------|-----------------|
| ADAM17 | 3,59  | Plasma Membrane |
| NPEPL1 | -3,38 | Unknown         |
| BACE2  | 3,88  | Cytoplasm       |
| CAPN1  | -2,17 | Cytoplasm       |
| CAST   | -2,07 | Cytoplasm       |

|              |           |                                                                                           |                            |        |                     |
|--------------|-----------|-------------------------------------------------------------------------------------------|----------------------------|--------|---------------------|
| 1387503_at   | NM_053526 | carboxypeptidase N, polypeptide 1                                                         | CPN1                       | -3,76  | Extracellular Space |
| 1387818_at   | NM_053736 | caspace 4, apoptosis-related cysteine peptidase                                           | CASP4                      | 18,89  | Cytoplasm           |
| 1373961_at   | AI170410  | chromosome 3 open reading frame 38                                                        | C3ORF38                    | 5,13   | Unknown             |
| 1383241_at   | BI292425  | complement component 1, r subcomponent                                                    | C1R                        | 126,90 | Extracellular Space |
| 1387893_at   | D88250    | complement component 1, s subcomponent                                                    | C1S                        | 35,79  | Extracellular Space |
| 1368000_at   | NM_016994 | complement component 3                                                                    | C3                         | 46,87  | Extracellular Space |
| 1382710_at   | AA997271  | ectodermal-neural cortex (with BTB-like domain)                                           | ENC1                       | 2,57   | Nucleus             |
| 1388666_at   | AI179988  | ectodermal-neural cortex (with BTB-like domain)                                           | ENC1                       | 5,16   | Nucleus             |
| 1368356_a_at | NM_030836 | endoplasmic reticulum aminopeptidase 1                                                    | ERAP1                      | 2,12   | Extracellular Space |
| 1387149_at   | NM_030836 | endoplasmic reticulum aminopeptidase 1                                                    | ERAP1                      | 11,17  | Extracellular Space |
| 1388204_at   | M60616    | matrix metallopeptidase 13 (collagenase 3)                                                | MMP13                      | 14,99  | Extracellular Space |
| 1368657_at   | NM_133523 | matrix metallopeptidase 3 (stromelysin 1, progelatinase)                                  | MMP3                       | 6,71   | Extracellular Space |
| 1369669_at   | NM_053970 | neurolysin (metallopeptidase M3 family)                                                   | NLN                        | 4,48   | Cytoplasm           |
| 1382181_at   | AI555069  | pigeon homolog (Drosophila)                                                               | PION                       | 4,75   | Unknown             |
| 1367800_at   | NM_013151 | plasminogen activator, tissue                                                             | PLAT                       | 3,31   | Extracellular Space |
| 1367710_at   | NM_017257 | proteasome (prosome, macropain) activator subunit 2 (PA28 beta)                           | PSME2                      | 4,77   | Cytoplasm           |
| 1382426_at   | AA997406  | proteasome (prosome, macropain) subunit, alpha type, 7                                    | PSMA7                      | -1,71  | Cytoplasm           |
| 1374033_at   | BG373505  | proteasome (prosome, macropain) subunit, beta type, 10                                    | PSMB10                     | 8,20   | Cytoplasm           |
| 1367786_at   | NM_080767 | proteasome (prosome, macropain) subunit, beta type, 8 (large multifunctional peptidase 7) | PSMB8                      | 115,61 | Cytoplasm           |
| 1370186_at   | AI599350  | proteasome (prosome, macropain) subunit, beta type, 9 (large multifunctional peptidase 2) | PSMB9                      | 158,45 | Cytoplasm           |
| 1394086_at   | AI069981  | SUMO1/sentrin specific peptidase 7                                                        | SENP7                      | 1,74   | Nucleus             |
| 1387195_at   | AB049189  | suppression of tumorigenicity 14 (colon carcinoma)                                        | ST14                       | 16,18  | Plasma Membrane     |
| 1389034_at   | BI295179  | ubiquitin specific peptidase 18                                                           | USP18                      | 9,26   | Cytoplasm           |
| 1378679_at   | BG372484  | ubiquitin specific peptidase 25                                                           | USP25                      | 8,43   | Unknown             |
| 1389091_at   | AI411205  | ubiquitin specific peptidase 3                                                            | USP3                       | 3,78   | Cytoplasm           |
| 1374940_at   | BM388945  | ubiquitin specific peptidase 36                                                           | USP36                      | -1,89  | Nucleus             |
| 1372121_at   | BF284408  | ubiquitin specific peptidase 9, X-linked                                                  | USP9X                      | -1,57  | Plasma Membrane     |
| 1381605_at   | AW521619  | ubiquitin specific protease 13 (isopeptidase T-3)                                         | USP13 (includes EG:310306) | -2,40  | Unknown             |
| 1390339_at   | BE099435  | ubiquitin specific protease 13 (isopeptidase T-3)                                         | USP13 (includes EG:310306) | -2,29  | Unknown             |
| 1377849_at   | BI284363  | valosin containing protein (p97)/p47 complex interacting protein 1                        | VCPIP1                     | 1,86   | Cytoplasm           |
|              |           | <b>Phosphatase</b>                                                                        |                            |        |                     |
| 1388544_at   | BI294941  | 2,3-bisphosphoglycerate mutase                                                            | BPGM                       | 2,39   | Unknown             |
| 1368146_at   | U02553    | dual specificity phosphatase 1                                                            | DUSP1                      | 4,54   | Nucleus             |
| 1386396_at   | AW528387  | dual specificity phosphatase 8                                                            | DUSP8                      | 1,58   | Nucleus             |
| 1394340_at   | BF523172  | inositol polyphosphate-1-phosphatase                                                      | INPP1                      | 4,26   | Cytoplasm           |
| 1399125_at   | BI275516  | inositol polyphosphate-1-phosphatase                                                      | INPP1                      | 9,33   | Cytoplasm           |
| 1372101_at   | AI177031  | phosphatidic acid phosphatase type 2B                                                     | PPAP2B                     | 3,71   | Plasma Membrane     |
| 1386968_at   | NM_022676 | protein phosphatase 1, regulatory (inhibitor) subunit 1A                                  | PPP1R1A                    | -3,50  | Cytoplasm           |
| 1383191_at   | BE097583  | protein phosphatase 1, regulatory (inhibitor) subunit 1A                                  | PPP1R1A                    | -3,45  | Cytoplasm           |
| 1373656_at   | AI713313  | protein phosphatase 1, regulatory (inhibitor) subunit 3D                                  | PPP1R3D                    | -3,30  | Unknown             |
| 1399005_at   | BG673380  | protein phosphatase 2, regulatory subunit B', alpha isoform                               | PPP2R5A                    | -1,60  | Cytoplasm           |
| 1382154_at   | BI289625  | protein tyrosine phosphatase, non-receptor type 12                                        | PTPN12                     | 2,46   | Cytoplasm           |
| 1368087_a_at | NM_133545 | protein tyrosine phosphatase, non-receptor type 21                                        | PTPN21                     | 4,22   | Cytoplasm           |
| 1389362_at   | AI317821  | protein tyrosine phosphatase, non-receptor type 3                                         | PTPN3                      | 3,62   | Cytoplasm           |
|              |           | <b>Transcription regulator</b>                                                            |                            |        |                     |
| 1369268_at   | NM_012912 | activating transcription factor 3                                                         | ATF3                       | 15,73  | Nucleus             |
| 1382070_at   | AA819758  | activating transcription factor 7 interacting protein                                     | ATF7IP                     | 2,04   | Nucleus             |
| 1388601_at   | AI598410  | activator of basal transcription 1                                                        | ABT1                       | -2,74  | Nucleus             |
| 1371996_at   | AI232384  | AE binding protein 2                                                                      | AEBP2                      | -1,72  | Nucleus             |
| 1374526_at   | BF396420  | ankyrin repeat and FYVE domain containing 1                                               | ANKFY1                     | 2,43   | Nucleus             |
| 1379113_at   | BE119226  | ankyrin repeat and SOCS box-containing 3                                                  | ASB3                       | -1,82  | Nucleus             |
| 1371805_at   | AI406508  | ankyrin repeat domain 46                                                                  | ANKRD46                    | -2,37  | Nucleus             |
| 1369049_at   | NM_053885 | arginine-glutamic acid dipeptide (RE) repeats                                             | RERE                       | 1,68   | Nucleus             |
| 1372964_at   | BI294751  | AT rich interactive domain 5B (MRF1-like)                                                 | ARID5B                     | 3,34   | Nucleus             |
| 1387212_at   | NM_012863 | basic helix-loop-helix domain containing, class B, 8                                      | BHLHB8                     | -2,74  | Nucleus             |
| 1398482_at   | AI411774  | B-cell CLL/lymphoma 3                                                                     | BCL3                       | 26,38  | Nucleus             |
| 1373868_at   | AI717547  | BCL2-associated transcription factor 1                                                    | BCLAF1                     | 1,58   | Nucleus             |
| 1393550_at   | BF564195  | cAMP responsive element modulator                                                         | CREM                       | -4,26  | Nucleus             |

|              |           |                                                                                                |
|--------------|-----------|------------------------------------------------------------------------------------------------|
| 1387343_at   | NM_013154 | CCAAT/enhancer binding protein (C/EBP), delta                                                  |
| 1367515_at   | BE111850  | CCR4-NOT transcription complex, subunit 7                                                      |
| 1379538_at   | BE104961  | centromere protein J                                                                           |
| 1387113_at   | NM_053335 | C-terminal binding protein 2                                                                   |
| 1370421_a_at | AB029342  | cullin-associated and neddylation-dissociated 2 (putative)                                     |
| 1392958_at   | AI547426  | cyldromatosis (turban tumor syndrome)                                                          |
| 1386988_at   | NM_031801 | deformed epidermal autoregulatory factor 1 (Drosophila)                                        |
| 1372453_at   | AI012637  | down-regulator of transcription 1, TBP-binding (negative cofactor 2)                           |
| 1374119_at   | BI279615  | E74-like factor 3 (ets domain transcription factor, epithelial-specific)                       |
| 1368321_at   | NM_012551 | early growth response 1                                                                        |
| 1373420_at   | AI175479  | ECSIT homolog (Drosophila)                                                                     |
| 1376292_at   | BM383423  | ets homologous factor                                                                          |
| 1373097_at   | BF282125  | excision repair cross-complementing rodent repair deficiency, complementation group 6          |
| 1393843_at   | AI071911  | fem-1 homolog b (C. elegans)                                                                   |
| 1368550_at   | NM_022858 | forkhead box Q1                                                                                |
| 1385464_at   | AI070944  | forkhead box Q1                                                                                |
| 1368489_at   | NM_012953 | FOS-like antigen 1                                                                             |
| 1372415_at   | BM385649  | general transcription factor IIIH, polypeptide 3, 34kDa                                        |
| 1374625_at   | AI176616  | hairy and enhancer of split 6 (Drosophila)                                                     |
| 1374846_at   | AI230884  | hexamethylene bis-acetamide inducible 1                                                        |
| 1388761_at   | AI180339  | histone deacetylase 1                                                                          |
| 1370908_at   | AA892297  | histone deacetylase 2                                                                          |
| 1391560_at   | AI237082  | human immunodeficiency virus type I enhancer binding protein 1                                 |
| 1368073_at   | NM_012591 | interferon regulatory factor 1                                                                 |
| 1398561_at   | BI302791  | interferon regulatory factor 2                                                                 |
| 1383564_at   | BF411036  | interferon regulatory factor 7                                                                 |
| 1372097_at   | BF284262  | interferon regulatory factor 8                                                                 |
| 1383448_at   | AI029121  | interferon regulatory factor 9                                                                 |
| 1389528_s_at | BI288619  | jun oncogene                                                                                   |
| 1369788_s_at | NM_021835 | jun oncogene                                                                                   |
| 1375205_at   | Z83046    | K(lysine) acetyltransferase 2B                                                                 |
| 1385961_at   | BF561079  | Kruppel-like factor 5 (intestinal)                                                             |
| 1394039_at   | BM382886  | Kruppel-like factor 5 (intestinal)                                                             |
| 1387060_at   | NM_031642 | Kruppel-like factor 6                                                                          |
| 1389913_at   | BI276990  | leucine rich repeat (in FLII) interacting protein 1                                            |
| 1389351_at   | BM387864  | leucine rich repeat (in FLII) interacting protein 1                                            |
| 1386156_at   | AI639451  | mediator complex subunit 13                                                                    |
| 1398344_at   | BI287962  | mediator complex subunit 17                                                                    |
| 1386895_at   | NM_053409 | melanoma antigen family D, 1                                                                   |
| 1377124_at   | AA964824  | metal-regulatory transcription factor 1                                                        |
| 1376810_at   | AI103325  | M-phase phosphoprotein 8                                                                       |
| 1381069_at   | BF413433  | myeloid/lymphoid or mixed-lineage leukemia (trithorax homolog, Drosophila)                     |
| 1378210_at   | BE114473  | myeloid/lymphoid or mixed-lineage leukemia (trithorax homolog, Drosophila)                     |
| 1378211_s_at | BE114473  | myeloid/lymphoid or mixed-lineage leukemia (trithorax homolog, Drosophila)                     |
| 1375793_at   | BI295700  | myeloid/lymphoid or mixed-lineage leukemia (trithorax homolog, Drosophila)                     |
| 1388701_at   | AI555336  | myeloid/lymphoid or mixed-lineage leukemia (trithorax homolog, Drosophila); translocated to, 6 |
| 1392770_at   | BF415817  | neogenin homolog 1 (chicken)                                                                   |
| 1378359_at   | AI072632  | NFKB repressing factor                                                                         |
| 1369409_at   | NM_022856 | NGFI-A binding protein 1 (EGR1 binding protein 1)                                              |
| 1393172_at   | AA848648  | NGFI-A binding protein 1 (EGR1 binding protein 1)                                              |
| 1393144_at   | BM388202  | N-myc (and STAT) interactor                                                                    |
| 1381875_at   | BM386847  | N-myc (and STAT) interactor                                                                    |
| 1390426_at   | BF389398  | Notch homolog 1, translocation-associated (Drosophila)                                         |
| 1398362_at   | AI011448  | Notch homolog 2 (Drosophila)                                                                   |
| 1371202_a_at | AB012232  | nuclear factor I/B                                                                             |
| 1370968_at   | AA858801  | nuclear factor of kappa light polypeptide gene enhancer in B-cells 1                           |
| 1375989_a_at | AI170362  | nuclear factor of kappa light polypeptide gene enhancer in B-cells 2 (p49/p100)                |
| 1378032_at   | AI176265  | nuclear factor of kappa light polypeptide gene enhancer in B-cells inhibitor, zeta             |

|          |       |                 |
|----------|-------|-----------------|
| CEBPD    | 2,34  | Nucleus         |
| CNOT7    | 2,45  | Nucleus         |
| CENPJ    | 5,32  | Nucleus         |
| CTBP2    | 2,37  | Nucleus         |
| CAND2    | -1,82 | Nucleus         |
| CYLD     | 2,82  | Nucleus         |
| DEAF1    | -1,55 | Nucleus         |
| DR1      | -1,53 | Nucleus         |
| ELF3     | 2,82  | Nucleus         |
| EGR1     | 5,96  | Nucleus         |
| ECSIT    | -2,23 | Nucleus         |
| EHF      | 6,33  | Nucleus         |
| ERCC6    | -1,51 | Nucleus         |
| FEM1B    | -3,13 | Nucleus         |
| FOXQ1    | 2,05  | Nucleus         |
| FOXQ1    | 2,99  | Nucleus         |
| FOSL1    | 2,17  | Nucleus         |
| GTF2H3   | -1,53 | Nucleus         |
| HES6     | -2,58 | Nucleus         |
| HEXIM1   | -1,82 | Nucleus         |
| HDAC1    | -1,70 | Nucleus         |
| HDAC2    | -1,64 | Nucleus         |
| HIVEP1   | 1,80  | Nucleus         |
| IRF1     | 66,39 | Nucleus         |
| IRF2     | 6,57  | Nucleus         |
| IRF7     | 90,31 | Nucleus         |
| IRF8     | 81,26 | Nucleus         |
| IRF9     | 12,18 | Nucleus         |
| JUN      | 4,00  | Nucleus         |
| JUN      | 4,71  | Nucleus         |
| KAT2B    | 3,52  | Nucleus         |
| KLF5     | 13,91 | Nucleus         |
| KLF5     | 14,60 | Nucleus         |
| KLF6     | 8,13  | Nucleus         |
| LRRFIP1  | 3,24  | Nucleus         |
| LRRFIP1  | 4,55  | Nucleus         |
| MED13    | 2,11  | Nucleus         |
| MED17    | 3,00  | Nucleus         |
| MAGED1   | -1,60 | Plasma Membrane |
| MTF1     | 2,07  | Nucleus         |
| MPHOSPH8 | 5,01  | Nucleus         |
| MLL      | 2,00  | Nucleus         |
| MLL      | 2,05  | Nucleus         |
| MLL      | 3,19  | Nucleus         |
| MLL      | 3,87  | Nucleus         |
| MLLT6    | 7,23  | Nucleus         |
| NEO1     | -1,89 | Plasma Membrane |
| NKRF     | -1,61 | Nucleus         |
| NAB1     | 1,89  | Nucleus         |
| NAB1     | 2,83  | Nucleus         |
| NMI      | 4,71  | Cytoplasm       |
| NMI      | 19,10 | Cytoplasm       |
| NOTCH1   | 2,34  | Plasma Membrane |
| NOTCH2   | 1,96  | Plasma Membrane |
| NFIB     | 4,14  | Nucleus         |
| NFKB1    | 19,06 | Nucleus         |
| NFKB2    | 12,32 | Nucleus         |
| NFKBIZ   | 12,91 | Nucleus         |



|                               |           |                                                                                                   |                             |        |                 |
|-------------------------------|-----------|---------------------------------------------------------------------------------------------------|-----------------------------|--------|-----------------|
| 1372196_at                    | BI284203  | nuclear receptor co-repressor 2                                                                   | NCOR2                       | 1,69   | Nucleus         |
| 1373433_at                    | BE108745  | nucleosomal binding protein 1                                                                     | NSBP1                       | -1,65  | Nucleus         |
| 1369242_at                    | NM_013001 | paired box 6                                                                                      | PAX6                        | -2,01  | Nucleus         |
| 1390531_at                    | BE098021  | peroxisomal proliferator-activated receptor A interacting complex 285                             | PRIC285 (includes EG:85441) | 7,20   | Nucleus         |
| 1370089_at                    | NM_031347 | peroxisome proliferator-activated receptor gamma, coactivator 1 alpha                             | PPARGC1A                    | -3,48  | Nucleus         |
| 1370995_at                    | AW528459  | POU class 2 homeobox 1                                                                            | POU2F1                      | 3,39   | Nucleus         |
| 1398926_at                    | AI410456  | prefoldin subunit 1                                                                               | PFDN1                       | -1,81  | Cytoplasm       |
| 1368702_at                    | U05989    | PRKC, apoptosis, WT1, regulator                                                                   | PAWR                        | 3,07   | Nucleus         |
| 1370300_at                    | AF061817  | prolactin regulatory element binding                                                              | PREB                        | -2,51  | Nucleus         |
| 1382191_at                    | AI228848  | protein inhibitor of activated STAT, 1                                                            | PIAS1                       | 1,78   | Nucleus         |
| 1391550_at                    | BE108780  | RAD54-like 2 (S. cerevisiae)                                                                      | RAD54L2                     | 1,66   | Nucleus         |
| 1383349_at                    | BE115594  | regulatory factor X, 5 (influences HLA class II expression)                                       | RFX5                        | 2,72   | Nucleus         |
| 1389381_at                    | AI411586  | sequestosome 1                                                                                    | SQSTM1                      | 6,96   | Cytoplasm       |
| 1388842_at                    | BG380385  | serum response factor (c-fos serum response element-binding transcription factor)                 | SRF                         | 3,62   | Nucleus         |
| 1372757_at                    | BM386875  | signal transducer and activator of transcription 1, 91kDa                                         | STAT1                       | 7,38   | Nucleus         |
| 1368835_at                    | AW434718  | signal transducer and activator of transcription 1, 91kDa                                         | STAT1                       | 14,50  | Nucleus         |
| 1387354_at                    | NM_032612 | signal transducer and activator of transcription 1, 91kDa                                         | STAT1                       | 28,13  | Nucleus         |
| 1373670_at                    | AA799569  | signal transducer and activator of transcription 2, 113kDa                                        | STAT2                       | 10,31  | Nucleus         |
| 1389571_at                    | BG666368  | signal transducer and activator of transcription 2, 113kDa                                        | STAT2                       | 17,98  | Nucleus         |
| 1371781_at                    | BI285863  | signal transducer and activator of transcription 3 (acute-phase response factor)                  | STAT3                       | 2,02   | Nucleus         |
| 1370224_at                    | BE113920  | signal transducer and activator of transcription 3 (acute-phase response factor)                  | STAT3                       | 2,66   | Nucleus         |
| 1368517_at                    | NM_053358 | single stranded DNA binding protein 3                                                             | SSBP3                       | 1,86   | Nucleus         |
| 1392957_at                    | BF565151  | single-stranded DNA binding protein 2                                                             | SSBP2                       | -1,52  | Nucleus         |
| 1373993_at                    | AA799470  | small nuclear RNA activating complex, polypeptide 5, 19kDa                                        | SNAPC5                      | -1,52  | Nucleus         |
| 1374838_at                    | BI293504  | SP140 nuclear body protein                                                                        | SP140                       | 13,23  | Nucleus         |
| 1387275_at                    | NM_053349 | SRY (sex determining region Y)-box 11                                                             | SOX11                       | 5,29   | Nucleus         |
| 1374682_at                    | BM383170  | SRY (sex determining region Y)-box 13                                                             | SOX13                       | 2,36   | Nucleus         |
| 1370159_at                    | AB003505  | SWI/SNF related, matrix associated, actin dependent regulator of chromatin, subfamily d, member 2 | SMARCD2                     | 1,86   | Nucleus         |
| 1376050_at                    | AI177663  | TAF5 RNA polymerase II, TATA box binding protein (TBP)-associated factor, 100kDa                  | TAF5                        | 2,39   | Nucleus         |
| 1380283_at                    | BF411100  | teashirt zinc finger homeobox 1                                                                   | TSHZ1                       | -2,33  | Nucleus         |
| 1383573_at                    | BE117444  | teashirt zinc finger homeobox 1                                                                   | TSHZ1                       | -2,07  | Nucleus         |
| 1373421_at                    | BM392224  | TGFB-induced factor homeobox 1                                                                    | TGIF1                       | 4,92   | Nucleus         |
| 1391212_at                    | BF418812  | transcription elongation factor A (SII)-like 1                                                    | TCEAL1                      | -3,52  | Nucleus         |
| 1392592_at                    | AI137045  | transcription factor 7-like 2 (T-cell specific, HMG-box)                                          | TCF7L2 (includes EG:6934)   | 4,35   | Nucleus         |
| 1368132_at                    | NM_133317 | transducer of ERBB2, 1                                                                            | TOB1                        | -1,79  | Nucleus         |
| 1390662_at                    | AW435169  | tripartite motif-containing 24                                                                    | TRIM24                      | 2,38   | Nucleus         |
| 1367831_at                    | NM_030989 | tumor protein p53                                                                                 | TP53                        | 1,58   | Nucleus         |
| 1367693_at                    | NM_013052 | tyrosine 3-monooxygenase/tryptophan 5-monooxygenase activation protein, eta polypeptide           | YWHAH                       | 1,68   | Cytoplasm       |
| 1398897_at                    | AI411988  | ubiquitin-conjugating enzyme E2 variant 1                                                         | UBE2V1                      | 1,56   | Nucleus         |
| 1380229_at                    | AW530004  | v-maf musculoaponeurotic fibrosarcoma oncogene homolog F (avian)                                  | MAFF                        | 14,17  | Nucleus         |
| 1372211_at                    | BI284461  | v-maf musculoaponeurotic fibrosarcoma oncogene homolog K (avian)                                  | MAFK                        | 2,87   | Nucleus         |
| 1372853_at                    | BF283772  | v-rel reticuloendotheliosis viral oncogene homolog A (avian)                                      | RELA                        | 2,32   | Nucleus         |
| 1370965_at                    | BG381660  | zinc finger E-box binding homeobox 1                                                              | ZEB1                        | 3,66   | Nucleus         |
| 1373106_at                    | AI178069  | zinc finger protein 36, C3H type-like 2                                                           | ZFP36L2                     | 2,71   | Nucleus         |
| 1368228_at                    | NM_031616 | zinc finger, RAN-binding domain containing 2                                                      | ZRANB2                      | -1,84  | Nucleus         |
| <b>Translation regulator</b>  |           |                                                                                                   |                             |        |                 |
| 1385118_at                    | BI292531  | eukaryotic translation initiation factor 2, subunit 1 alpha, 35kDa                                | EIF2S1                      | -2,01  | Cytoplasm       |
| 1383011_at                    | AI501182  | eukaryotic translation initiation factor 2A, 65kDa                                                | EIF2A                       | 1,62   | Cytoplasm       |
| 1374968_at                    | AI599930  | eukaryotic translation initiation factor 2C, 1                                                    | EIF2C1                      | -1,77  | Cytoplasm       |
| 1368867_at                    | BF281131  | eukaryotic translation initiation factor 2C, 2                                                    | EIF2C2                      | 1,97   | Cytoplasm       |
| 1367537_at                    | AI012479  | eukaryotic translation initiation factor 4E nuclear import factor 1                               | EIF4ENIF1                   | 1,69   | Cytoplasm       |
| 1398620_at                    | BF397903  | sterile alpha motif domain containing 4A                                                          | SAMD4A                      | 7,05   | Cytoplasm       |
| <b>Transmembrane receptor</b> |           |                                                                                                   |                             |        |                 |
| 1367595_s_at                  | NM_012512 | beta-2-microglobulin                                                                              | B2M                         | 1,85   | Plasma Membrane |
| 1371440_at                    | AW916647  | beta-2-microglobulin                                                                              | B2M                         | 7,04   | Plasma Membrane |
| 1377698_at                    | AW433947  | CD40 molecule, TNF receptor superfamily member 5                                                  | CD40                        | 625,64 | Plasma Membrane |
| 1384837_at                    | AI137672  | CD69 molecule                                                                                     | CD69                        | 191,71 | Plasma Membrane |
| 1367679_at                    | NM_013069 | CD74 molecule, major histocompatibility complex, class II invariant chain                         | CD74                        | 13,21  | Plasma Membrane |

|              |           |                                                                                    |
|--------------|-----------|------------------------------------------------------------------------------------|
| 1388547_at   | BE328951  | claudin 4                                                                          |
| 1369182_at   | NM_013057 | coagulation factor III (thromboplastin, tissue factor)                             |
| 1368179_at   | NM_134465 | cytokine receptor-like factor 2                                                    |
| 1384842_s_at | AI231531  | Fas (TNF receptor superfamily, member 6)                                           |
| 1387039_at   | NM_030828 | glypican 1                                                                         |
| 1387202_at   | NM_012967 | intercellular adhesion molecule 1                                                  |
| 1374601_at   | BI274482  | interferon gamma receptor 2 (interferon gamma transducer 1)                        |
| 1383616_at   | AA997562  | interleukin 10 receptor, beta                                                      |
| 1387946_at   | AF065438  | lectin, galactoside-binding, soluble, 3 binding protein                            |
| 1370972_x_at | BI300597  | major histocompatibility complex, class I, C                                       |
| 1388071_x_at | M24024    | major histocompatibility complex, class I, C                                       |
| 1370428_x_at | AJ249701  | major histocompatibility complex, class I, C                                       |
| 1369110_x_at | NM_012645 | major histocompatibility complex, class I, C                                       |
| 1371171_at   | M10094    | major histocompatibility complex, class I, C                                       |
| 1371078_at   | AI500830  | major histocompatibility complex, class I, C                                       |
| 1397859_x_at | BI291927  | major histocompatibility complex, class I, C                                       |
| 1388212_a_at | AJ243974  | major histocompatibility complex, class I, E                                       |
| 1371123_x_at | AJ243973  | major histocompatibility complex, class I, E                                       |
| 1388164_at   | AF029241  | major histocompatibility complex, class I, E                                       |
| 1388213_a_at | AJ243973  | major histocompatibility complex, class I, E                                       |
| 1387205_at   | NM_022921 | major histocompatibility complex, class I, G                                       |
| 1376362_at   | BG380575  | neuronal pentraxin receptor                                                        |
| 1373577_at   | BE116566  | neuropilin 1                                                                       |
| 1370177_at   | AI548856  | poliovirus receptor                                                                |
| 1389804_at   | BF392605  | REL1 tumor necrosis factor receptor                                                |
| 1368901_at   | BG666306  | thrombomodulin                                                                     |
| 1369407_at   | NM_012870 | tumor necrosis factor receptor superfamily, member 11b                             |
| 1376327_at   | AI169601  | tumor necrosis factor receptor superfamily, member 14 (herpesvirus entry mediator) |
| 1384506_at   | H33706    | unc-5 homolog C (C. elegans)                                                       |

#### Transporter

|              |           |                                                             |
|--------------|-----------|-------------------------------------------------------------|
| 1368868_at   | NM_057103 | A kinase (PRKA) anchor protein 12                           |
| 1368869_at   | BG663107  | A kinase (PRKA) anchor protein 12                           |
| 1371858_at   | BM385719  | adaptor-related protein complex 1, sigma 1 subunit          |
| 1368246_at   | NM_133305 | adaptor-related protein complex 3, mu 2 subunit             |
| 1389492_at   | AA818820  | ADP-ribosylation factor GTPase activating protein 1         |
| 1385709_x_at | AW529028  | ankylosis, progressive homolog (mouse)                      |
| 1393439_a_at | AI045767  | ankylosis, progressive homolog (mouse)                      |
| 1394202_x_at | AI176117  | ankylosis, progressive homolog (mouse)                      |
| 1372604_at   | BI289459  | apolipoprotein L, 3                                         |
| 1371925_at   | AA893621  | ATPase type 13A1                                            |
| 1397224_at   | AW534277  | ATPase, Ca <sup>++</sup> transporting, plasma membrane 1    |
| 1368698_at   | J03754    | ATPase, Ca <sup>++</sup> transporting, plasma membrane 2    |
| 1368057_at   | NM_012804 | ATP-binding cassette, sub-family D (ALD), member 3          |
| 1379717_at   | BM385804  | ATP-binding cassette, sub-family G (WHITE), member 3        |
| 1374045_at   | AI598851  | component of oligomeric golgi complex 8                     |
| 1389596_at   | BM389642  | COX18 cytochrome c oxidase assembly homolog (S. cerevisiae) |
| 1387369_at   | NM_019277 | exocyst complex component 6                                 |
| 1387237_at   | BM388722  | exocyst complex component 7                                 |
| 1393734_at   | AA997025  | fracture callus 1 homolog (rat)                             |
| 1368977_a_at | AF061242  | fracture callus 1 homolog (rat)                             |
| 1370065_at   | NM_053318 | hemopexin                                                   |
| 1388566_at   | AI102215  | LIM and SH3 protein 1                                       |
| 1387011_at   | NM_130741 | lipocalin 2                                                 |
| 1372520_at   | AI172056  | myeloid cell leukemia sequence 1 (BCL2-related)             |
| 1374075_at   | AI175533  | N-ethylmaleimide-sensitive factor attachment protein, gamma |
| 1371908_at   | AA891920  | NTF2-like export factor 1                                   |
| 1374638_at   | AI012951  | peroxisomal biogenesis factor 13                            |
| 1387399_at   | NM_020098 | piccolo (presynaptic cytomatrix protein)                    |

|                           |        |                     |
|---------------------------|--------|---------------------|
| CLDN4                     | 9,74   | Plasma Membrane     |
| F3                        | 8,66   | Plasma Membrane     |
| CRLF2                     | 1,80   | Plasma Membrane     |
| FAS                       | 5,87   | Plasma Membrane     |
| GPC1                      | -2,20  | Plasma Membrane     |
| ICAM1                     | 192,89 | Plasma Membrane     |
| IFNGR2                    | 1,72   | Plasma Membrane     |
| IL10RB                    | 4,75   | Plasma Membrane     |
| LGALS3BP                  | 8,54   | Plasma Membrane     |
| HLA-C                     | 3,71   | Plasma Membrane     |
| HLA-C                     | 3,92   | Plasma Membrane     |
| HLA-C                     | 5,06   | Plasma Membrane     |
| HLA-C                     | 5,37   | Plasma Membrane     |
| HLA-C                     | 5,95   | Plasma Membrane     |
| HLA-C                     | 15,49  | Plasma Membrane     |
| HLA-C                     | 15,99  | Plasma Membrane     |
| HLA-E                     | 25,70  | Plasma Membrane     |
| HLA-E                     | 28,97  | Plasma Membrane     |
| HLA-E                     | 47,08  | Plasma Membrane     |
| HLA-E                     | 65,12  | Plasma Membrane     |
| HLA-G                     | 6,08   | Plasma Membrane     |
| NPTXR                     | -2,17  | Plasma Membrane     |
| NRP1                      | 3,88   | Plasma Membrane     |
| PVR                       | 14,72  | Plasma Membrane     |
| REL1                      | 4,66   | Plasma Membrane     |
| THBD                      | -5,53  | Plasma Membrane     |
| TNFRSF11B                 | 6,93   | Plasma Membrane     |
| TNFRSF14                  | 4,17   | Plasma Membrane     |
| UNC5C                     | 7,76   | Plasma Membrane     |
| AKAP12                    | 1,98   | Cytoplasm           |
| AKAP12                    | 13,73  | Cytoplasm           |
| AP1S1                     | -1,75  | Cytoplasm           |
| AP3M2                     | 2,19   | Cytoplasm           |
| ARFGAP1                   | -1,91  | Cytoplasm           |
| ANKH                      | -4,24  | Plasma Membrane     |
| ANKH                      | -3,60  | Plasma Membrane     |
| ANKH                      | -1,76  | Plasma Membrane     |
| APOL3 (includes EG:80833) | 34,24  | Cytoplasm           |
| ATP13A1                   | 1,75   | Extracellular Space |
| ATP2B1                    | -1,63  | Plasma Membrane     |
| ATP2B2                    | -6,08  | Plasma Membrane     |
| ABCD3                     | -2,62  | Cytoplasm           |
| ABCG3                     | 13,56  | Plasma Membrane     |
| COG8                      | -2,25  | Cytoplasm           |
| COX18                     | -1,65  | Cytoplasm           |
| EXOC6                     | 5,54   | Unknown             |
| EXOC7                     | -1,53  | Plasma Membrane     |
| FXC1                      | -2,42  | Cytoplasm           |
| FXC1                      | -1,51  | Cytoplasm           |
| HPX                       | 5,00   | Extracellular Space |
| LASP1                     | 1,95   | Cytoplasm           |
| LCN2                      | 134,50 | Extracellular Space |
| MCL1                      | 2,68   | Cytoplasm           |
| NAPG                      | -1,67  | Cytoplasm           |
| NXT1                      | -2,03  | Nucleus             |
| PEX13                     | -1,83  | Cytoplasm           |
| PCLO                      | -3,55  | Cytoplasm           |

|              |           |                                                                                                         |                              |        |                     |
|--------------|-----------|---------------------------------------------------------------------------------------------------------|------------------------------|--------|---------------------|
| 1374835_at   | AA944485  | RAB interacting factor                                                                                  | RABIF                        | -2,06  | Unknown             |
| 1372715_at   | AA819349  | sideroflexin 1                                                                                          | SFXN1                        | -2,54  | Cytoplasm           |
| 1379307_at   | BF283256  | sodium channel and clathrin linker 1                                                                    | SCLT1                        | -1,52  | Plasma Membrane     |
| 1370367_at   | D63772    | solute carrier family 1 (neuronal/epithelial high affinity glutamate transporter, system Xag), member 1 | SLC1A1                       | 7,19   | Plasma Membrane     |
| 1367877_at   | NM_013173 | solute carrier family 11 (proton-coupled divalent metal ion transporters), member 2                     | SLC11A2                      | 9,33   | Plasma Membrane     |
| 1374885_at   | AI172278  | solute carrier family 12 (potassium/chloride transporters), member 6                                    | SLC12A6                      | -3,38  | Plasma Membrane     |
| 1367853_at   | NM_031798 | solute carrier family 12 (sodium/potassium/chloride transporters), member 2                             | SLC12A2                      | -2,90  | Plasma Membrane     |
| 1390036_at   | BI289867  | solute carrier family 16, member 6 (monocarboxylic acid transporter 7)                                  | SLC16A6                      | 4,25   | Plasma Membrane     |
| 1390591_at   | AI169163  | solute carrier family 17 (sodium phosphate), member 3                                                   | SLC17A3                      | 2,05   | Plasma Membrane     |
| 1370848_at   | BI284218  | solute carrier family 2 (facilitated glucose transporter), member 1                                     | SLC2A1                       | 4,25   | Plasma Membrane     |
| 1387228_at   | NM_012879 | solute carrier family 2 (facilitated glucose transporter), member 2                                     | SLC2A2                       | -2,68  | Plasma Membrane     |
| 1370314_at   | AB000489  | solute carrier family 20 (phosphate transporter), member 1                                              | SLC20A1                      | 2,25   | Plasma Membrane     |
| 1383444_at   | AA964069  | solute carrier family 24 (sodium/potassium/calcium exchanger), member 2                                 | SLC24A2                      | -2,58  | Plasma Membrane     |
| 1379073_at   | AA859663  | solute carrier family 25 (mitochondrial carrier; phosphate carrier), member 23                          | SLC25A23                     | -2,89  | Unknown             |
| 1372341_at   | AI233213  | solute carrier family 25, member 36                                                                     | SLC25A36                     | -1,60  | Unknown             |
| 1367789_at   | NM_053580 | solute carrier family 27 (fatty acid transporter), member 1                                             | SLC27A1                      | -2,36  | Plasma Membrane     |
| 1384413_at   | AA900068  | solute carrier family 35, member A5                                                                     | SLC35A5                      | 2,67   | Unknown             |
| 1386960_at   | NM_031589 | solute carrier family 37 (glucose-6-phosphate transporter), member 4                                    | SLC37A4                      | -8,68  | Cytoplasm           |
| 1372778_at   | AA799420  | solute carrier family 39 (zinc transporter), member 1                                                   | SLC39A1                      | 2,60   | Plasma Membrane     |
| 1372482_at   | AI600216  | solute carrier family 39 (zinc transporter), member 13                                                  | SLC39A13                     | -1,52  | Unknown             |
| 1383319_at   | BI293444  | solute carrier family 4, sodium borate transporter, member 11                                           | SLC4A11                      | 3,30   | Unknown             |
| 1376972_at   | AI407028  | solute carrier family 40 (iron-regulated transporter), member 1                                         | SLC40A1                      | -3,70  | Plasma Membrane     |
| 1368480_at   | NM_053492 | solute carrier family 44, member 1                                                                      | SLC44A1                      | 2,75   | Plasma Membrane     |
| 1385107_at   | AI137961  | solute carrier family 6 (amino acid transporter), member 14                                             | SLC6A14                      | 7,16   | Plasma Membrane     |
| 1378133_at   | AW532618  | solute carrier family 7, (cationic amino acid transporter, y+ system) member 11                         | SLC7A11                      | 2,93   | Plasma Membrane     |
| 1394786_at   | AW526631  | sortilin-related receptor, L(DLR class) A repeats-containing                                            | SORL1                        | -2,06  | Plasma Membrane     |
| 1390710_x_at | AA850618  | sortilin-related receptor, L(DLR class) A repeats-containing                                            | SORL1                        | -1,63  | Plasma Membrane     |
| 1372656_at   | BI282899  | sorting nexin 15                                                                                        | SNX15                        | 1,96   | Cytoplasm           |
| 1388556_at   | BG381589  | syntaxin 6                                                                                              | STX6                         | 2,56   | Cytoplasm           |
| 1375565_at   | BF420723  | translocase of inner mitochondrial membrane 22 homolog (yeast)                                          | TIMM22                       | -1,86  | Cytoplasm           |
| 1390432_at   | AA997338  | transmembrane and coiled-coil domains 3                                                                 | TMCO3                        | -3,10  | Unknown             |
| 1388149_at   | X57523    | transporter 1, ATP-binding cassette, sub-family B (MDR/TAP)                                             | TAP1                         | 201,49 | Cytoplasm           |
| 1368732_at   | NM_032056 | transporter 2, ATP-binding cassette, sub-family B (MDR/TAP)                                             | TAP2                         | 60,68  | Cytoplasm           |
|              |           | <b>Other</b>                                                                                            |                              |        |                     |
| 1391754_at   | BM391818  | 2'-5' oligoadenylate synthetase II                                                                      | OASII                        | 5,64   | Unknown             |
| 1390022_at   | AA946538  | actin related protein 2/3 complex, subunit 5, 16kDa                                                     | ARPC5                        | 1,71   | Cytoplasm           |
| 1371327_a_at | BG666668  | actin, gamma 1                                                                                          | ACTG1                        | 1,73   | Cytoplasm           |
| 1389189_at   | BF555956  | actinin, alpha 1                                                                                        | ACTN1                        | 2,57   | Cytoplasm           |
| 1370043_at   | NM_031753 | activated leukocyte cell adhesion molecule                                                              | ALCAM                        | 2,03   | Plasma Membrane     |
| 1383499_at   | BG371995  | adhesion molecule with Ig-like domain 1                                                                 | AMIGO1                       | -1,68  | Unknown             |
| 1373591_at   | BG375435  | ADP-ribosylation factor interacting protein 2                                                           | ARFIP2                       | -1,65  | Cytoplasm           |
| 1392038_at   | BF387389  | ADP-ribosylation factor-like 6 interacting protein 1                                                    | ARL6IP1                      | 2,17   | Cytoplasm           |
| 1372429_at   | BF419113  | adrenocortical dysplasia homolog (mouse)                                                                | ACD                          | -2,28  | Nucleus             |
| 1387219_at   | NM_012715 | adrenomedullin                                                                                          | ADM                          | 33,76  | Extracellular Space |
| 1370307_at   | M64780    | agrin                                                                                                   | AGRN                         | 13,96  | Plasma Membrane     |
| 1371703_at   | AI407114  | AHNAK nucleoprotein                                                                                     | AHNAK                        | 42,94  | Nucleus             |
| 1372879_at   | BI283873  | AKT1 substrate 1 (proline-rich)                                                                         | AKT1S1                       | -1,61  | Unknown             |
| 1398612_at   | BM383010  | aldo-keto reductase family 1, member C12                                                                | AKR1C12 (includes EG:361266) | -1,70  | Unknown             |
| 1388573_at   | BF288140  | alkB, alkylation repair homolog 1 (E. coli)                                                             | ALKBH1                       | 1,79   | Unknown             |
| 1378726_at   | AI556485  | alkB, alkylation repair homolog 4 (E. coli)                                                             | ALKBH4                       | 1,52   | Unknown             |
| 1371627_at   | BI277433  | angiomin like 1                                                                                         | AMOTL1                       | -2,84  | Plasma Membrane     |
| 1383018_at   | BF420082  | angiopoietin-like 6                                                                                     | ANGPTL6                      | 3,81   | Extracellular Space |
| 1373351_at   | BI286775  | ankyrin 2, neuronal                                                                                     | ANK2                         | 2,24   | Plasma Membrane     |
| 1377811_at   | AI577496  | ankyrin repeat domain 12                                                                                | ANKRD12                      | 1,76   | Nucleus             |
| 1378433_at   | BI296242  | ankyrin repeat domain 33B                                                                               | ANKRD33B                     | 4,03   | Unknown             |
| 1373685_at   | BI291430  | ankyrin repeat domain 37                                                                                | ANKRD37                      | -2,46  | Unknown             |
| 1388445_at   | BF287964  | annexin A11                                                                                             | ANXA11                       | 2,10   | Nucleus             |
| 1367584_at   | NM_019905 | annexin A2                                                                                              | ANXA2                        | 8,64   | Plasma Membrane     |

|              |           |                                                             |                             |       |                     |
|--------------|-----------|-------------------------------------------------------------|-----------------------------|-------|---------------------|
| 1376496_at   | AI717736  | apolipoprotein L 9a                                         | APOL9A (includes EG:503164) | 14,86 | Unknown             |
| 1388511_at   | AI412079  | ArfGAP with RhoGAP domain, ankyrin repeat and PH domain 1   | ARAP1                       | 1,89  | Cytoplasm           |
| 1392815_at   | BE114489  | ArfGAP with RhoGAP domain, ankyrin repeat and PH domain 2   | ARAP2                       | 3,37  | Cytoplasm           |
| 1380545_at   | BF419027  | ArfGAP with SH3 domain, ankyrin repeat and PH domain 1      | ASAP1                       | -2,34 | Plasma Membrane     |
| 1382330_at   | BE116838  | ArfGAP with SH3 domain, ankyrin repeat and PH domain 2      | ASAP2                       | -1,82 | Nucleus             |
| 1376297_at   | BE112202  | arrestin domain containing 1                                | ARRDC1                      | 1,85  | Unknown             |
| 1377665_at   | AA998979  | ATG2 autophagy related 2 homolog A (S. cerevisiae)          | ATG2A                       | 1,54  | Unknown             |
| 1379561_at   | AW433567  | ATPase family, AAA domain containing 1                      | ATAD1                       | 3,05  | Unknown             |
| 1393217_at   | BF282804  | ATP-binding cassette, sub-family G (WHITE), member 3-like 1 | ABCG3L1                     | 8,23  | Unknown             |
| 1368509_at   | NM_053618 | Bardet-Biedl syndrome 2                                     | BBS2                        | -2,01 | Unknown             |
| 1393641_at   | AA925583  | B-cell linker                                               | BLNK                        | 23,77 | Cytoplasm           |
| 1382993_at   | AI236152  | BCL2 binding component 3                                    | BBC3                        | 2,40  | Cytoplasm           |
| 1377634_at   | AI715220  | BCL2/adenovirus E1B 19kDa interacting protein 2             | BNIP2                       | 2,45  | Cytoplasm           |
| 1374886_at   | BF402630  | BCS1-like (yeast)                                           | BCS1L                       | -3,14 | Cytoplasm           |
| 1377759_at   | BG666928  | BH3 interacting domain death agonist                        | BID                         | 6,29  | Cytoplasm           |
| 1388733_at   | AI177631  | bifunctional apoptosis regulator                            | BFAR                        | 1,69  | Cytoplasm           |
| 1373768_at   | AI406390  | BMS1 homolog, ribosome assembly protein (yeast)             | BMS1                        | -1,88 | Nucleus             |
| 1383829_at   | BF392234  | bobby sox homolog (Drosophila)                              | BBX                         | 1,59  | Nucleus             |
| 1390738_at   | BM385476  | bone marrow stromal cell antigen 2                          | BST2                        | 4,60  | Plasma Membrane     |
| 1398350_at   | BG380454  | brain abundant, membrane attached signal protein 1          | BASP1                       | 1,71  | Plasma Membrane     |
| 1382467_at   | C07140    | brain expressed gene 1                                      | BEX1 (includes EG:19716)    | -2,02 | Unknown             |
| 1376533_at   | BF398368  | bromodomain adjacent to zinc finger domain, 2B              | BAZ2B                       | -1,79 | Unknown             |
| 1374592_at   | BI282671  | BTB (POZ) domain containing 6                               | BTBD6                       | -3,39 | Unknown             |
| 1373179_at   | BI300727  | BTB (POZ) domain containing 8                               | BTBD8 (includes EG:284697)  | -6,96 | Unknown             |
| 1383083_at   | AI575458  | BTG3 associated nuclear protein                             | BANP                        | 1,96  | Nucleus             |
| 1390754_at   | BF412921  | Ca <sup>++</sup> -dependent secretion activator             | CADPS                       | 3,35  | Plasma Membrane     |
| 1386947_at   | NM_031334 | cadherin 1, type 1, E-cadherin (epithelial)                 | CDH1                        | 2,91  | Plasma Membrane     |
| 1370562_at   | M11596    | calcitonin-related polypeptide, beta                        | CALCB (includes EG:116903)  | 13,02 | Extracellular Space |
| 1396749_at   | BF390144  | calcium binding protein 1                                   | CABP1                       | -4,55 | Cytoplasm           |
| 1388659_at   | BI295783  | calcium regulated heat stable protein 1, 24kDa              | CARHSP1                     | 2,11  | Cytoplasm           |
| 1389598_at   | BI280367  | calmodulin-like 4                                           | CALML4                      | -2,80 | Unknown             |
| 1372584_at   | BG672517  | cannabinoid receptor interacting protein 1                  | CNRIP1                      | -1,98 | Unknown             |
| 1368545_at   | NM_057138 | CASP8 and FADD-like apoptosis regulator                     | CFLAR                       | 7,50  | Cytoplasm           |
| 1398354_at   | AI555457  | catenin (cadherin-associated protein), alpha-like 1         | CTNNAL1                     | -2,22 | Plasma Membrane     |
| 1388415_at   | BE109560  | catenin (cadherin-associated protein), delta 1              | CTNND1                      | 1,52  | Nucleus             |
| 1382603_at   | AW521319  | CD274 molecule                                              | CD274                       | 17,59 | Plasma Membrane     |
| 1379269_at   | BM385296  | CD2-associated protein                                      | CD2AP                       | 1,95  | Cytoplasm           |
| 1387952_a_at | AF065147  | CD44 molecule (Indian blood group)                          | CD44                        | 9,39  | Plasma Membrane     |
| 1368921_a_at | NM_012924 | CD44 molecule (Indian blood group)                          | CD44                        | 13,45 | Plasma Membrane     |
| 1386976_at   | NM_031797 | CD82 molecule                                               | CD82                        | 3,40  | Plasma Membrane     |
| 1390529_at   | AI412355  | CD83 molecule                                               | CD83                        | 4,69  | Plasma Membrane     |
| 1378739_at   | AA818135  | cell death-inducing DFFA-like effector c                    | CIDEC                       | 8,64  | Cytoplasm           |
| 1388771_at   | BG668182  | CGG triplet repeat binding protein 1                        | CGGBP1                      | 1,57  | Nucleus             |
| 1374695_at   | BF564593  | chromobox homolog 1 (HP1 beta homolog Drosophila)           | CBX1                        | 1,61  | Nucleus             |
| 1371395_at   | AA851329  | chromobox homolog 3 (HP1 gamma homolog, Drosophila)         | CBX3                        | -1,54 | Nucleus             |
| 1371672_at   | AI406275  | chromobox homolog 7                                         | CBX7                        | -3,90 | Nucleus             |
| 1391206_at   | AW533313  | chromosome 1 open reading frame 106                         | C1ORF106                    | 2,00  | Unknown             |
| 1371443_at   | AI409584  | chromosome 1 open reading frame 174                         | C1ORF174                    | -3,05 | Unknown             |
| 1398446_at   | BG376030  | chromosome 1 open reading frame 2                           | C1ORF2                      | -1,87 | Unknown             |
| 1398364_at   | BF555972  | chromosome 1 open reading frame 63                          | C1ORF63                     | -1,67 | Unknown             |
| 1377830_a_at | BF281728  | chromosome 10 open reading frame 125                        | C10ORF125                   | -3,06 | Unknown             |
| 1382100_at   | AA997169  | chromosome 10 open reading frame 97                         | C10ORF97                    | -1,74 | Unknown             |
| 1390232_at   | BM388441  | chromosome 11 open reading frame 24                         | C11ORF24                    | -2,72 | Extracellular Space |
| 1381118_at   | AW526652  | chromosome 11 open reading frame 46                         | C11ORF46                    | -2,86 | Unknown             |
| 1372843_at   | BG377188  | chromosome 11 open reading frame 75                         | C11ORF75                    | -1,54 | Unknown             |
| 1378980_at   | AI044779  | chromosome 12 open reading frame 30                         | C12ORF30                    | 3,55  | Unknown             |
| 1395297_at   | AI556097  | chromosome 12 open reading frame 35                         | C12ORF35                    | 3,20  | Unknown             |
| 1373143_at   | BM390131  | chromosome 12 open reading frame 35                         | C12ORF35                    | 3,96  | Unknown             |

|              |           |                                                        |                            |        |                     |
|--------------|-----------|--------------------------------------------------------|----------------------------|--------|---------------------|
| 1392547_at   | AI716211  | chromosome 15 open reading frame 48                    | C15ORF48                   | 85,71  | Nucleus             |
| 1391069_at   | AI231713  | chromosome 16 open reading frame 72                    | C16ORF72                   | 1,51   | Unknown             |
| 1398998_at   | AI407273  | chromosome 16 open reading frame 72                    | C16ORF72                   | 2,23   | Unknown             |
| 1373831_at   | AW920524  | chromosome 17 open reading frame 62                    | C17ORF62                   | 3,62   | Unknown             |
| 1373665_at   | AI598689  | chromosome 17 open reading frame 68                    | C17ORF68                   | -2,25  | Unknown             |
| 1388532_at   | AI599496  | chromosome 18 open reading frame 10                    | C18ORF10                   | -2,60  | Nucleus             |
| 1388465_at   | AA891733  | chromosome 18 open reading frame 19                    | C18ORF19                   | -2,04  | Unknown             |
| 1379740_at   | AW521797  | chromosome 18 open reading frame 54                    | C18ORF54                   | -1,87  | Extracellular Space |
| 1389365_at   | AI228291  | chromosome 19 open reading frame 12                    | C19ORF12                   | 4,06   | Unknown             |
| 1389155_at   | AA943139  | chromosome 19 open reading frame 26                    | C19ORF26                   | -2,37  | Unknown             |
| 1383662_at   | AI043759  | chromosome 19 open reading frame 66                    | C19ORF66                   | 3,19   | Unknown             |
| 1371507_at   | BM384151  | chromosome 20 open reading frame 152                   | C20ORF152                  | -1,85  | Unknown             |
| 1398949_at   | BM392094  | chromosome 20 open reading frame 43                    | C20ORF43                   | -1,89  | Unknown             |
| 1372044_at   | AI410321  | chromosome 22 open reading frame 25                    | C22ORF25                   | -1,94  | Unknown             |
| 1373137_at   | BI284360  | chromosome 3 open reading frame 21                     | C3ORF21                    | -1,65  | Unknown             |
| 1376156_at   | BM391273  | chromosome 3 open reading frame 39                     | C3ORF39                    | -2,92  | Unknown             |
| 1372329_at   | BM389011  | chromosome 4 open reading frame 16                     | C4ORF16                    | 2,48   | Unknown             |
| 1377268_at   | BM390418  | chromosome 5 open reading frame 37                     | C5ORF37                    | -1,57  | Unknown             |
| 1377439_at   | BF408617  | chromosome 5 open reading frame 42                     | C5ORF42                    | 4,63   | Unknown             |
| 1391282_at   | AI029285  | chromosome 6 open reading frame 192                    | C6ORF192                   | -1,67  | Unknown             |
| 1397703_at   | BF288942  | chromosome 7 open reading frame 23                     | C7ORF23                    | 2,76   | Unknown             |
| 1384143_at   | BE114778  | cingulin                                               | CGN                        | 3,45   | Plasma Membrane     |
| 1389577_at   | AI101160  | cirrhosis, autosomal recessive 1A (cirhin)             | CIRH1A                     | -2,75  | Nucleus             |
| 1398842_at   | BM386513  | clathrin, heavy chain (Hc)                             | CLTC                       | -1,66  | Plasma Membrane     |
| 1376711_at   | BG673439  | claudin 11                                             | CLDN11                     | -1,53  | Plasma Membrane     |
| 1389361_at   | AI012506  | clusterin associated protein 1                         | CLUAP1                     | -3,66  | Unknown             |
| 1389368_at   | AW253242  | CNKSR family member 3                                  | CNKSR3                     | 21,85  | Plasma Membrane     |
| 1372305_at   | AA893634  | coatamer protein complex, subunit zeta 2               | COPZ2 (includes EG:360611) | -1,81  | Unknown             |
| 1373866_at   | AI228596  | coenzyme Q10 homolog B (S. cerevisiae)                 | COQ10B                     | -1,51  | Unknown             |
| 1388570_at   | AI232494  | coenzyme Q9 homolog (S. cerevisiae)                    | COQ9                       | -1,81  | Cytoplasm           |
| 1384378_at   | BI293046  | coiled-coil alpha-helical rod protein 1                | CCHCR1                     | 4,24   | Cytoplasm           |
| 1390101_at   | AI170609  | coiled-coil domain containing 107                      | CCDC107                    | -1,96  | Unknown             |
| 1398371_at   | AI409075  | coiled-coil domain containing 132                      | CCDC132                    | 1,71   | Unknown             |
| 1390875_a_at | BF290046  | coiled-coil domain containing 41                       | CCDC41                     | 1,64   | Unknown             |
| 1393952_at   | BI278833  | coiled-coil domain containing 68                       | CCDC68                     | -6,89  | Unknown             |
| 1399165_a_at | AA943500  | coiled-coil domain containing 97                       | CCDC97                     | -5,04  | Unknown             |
| 1385904_at   | BG153342  | cold inducible RNA binding protein                     | CIRBP                      | -2,64  | Nucleus             |
| 1391812_at   | AI145876  | collagen type VI alpha 6                               | COL6A6                     | -2,55  | Unknown             |
| 1388973_at   | BM388861  | collagen, type IX, alpha 1                             | COL9A1                     | -2,68  | Extracellular Space |
| 1388459_at   | AI101782  | collagen, type XVIII, alpha 1                          | COL18A1                    | -2,54  | Extracellular Space |
| 1369764_at   | NM_012516 | complement component 4 binding protein, alpha          | C4BPA                      | 9,63   | Extracellular Space |
| 1368695_at   | NM_016995 | complement component 4 binding protein, beta           | C4BPB                      | 17,72  | Extracellular Space |
| 1393740_at   | BI294230  | connector enhancer of kinase suppressor of Ras 1       | CNKSR1                     | 3,10   | Cytoplasm           |
| 1383648_x_at | BI283883  | crumbs homolog 3 (Drosophila)                          | CRB3                       | 2,25   | Plasma Membrane     |
| 1388385_at   | BG371710  | crystallin, beta A2                                    | CRYBA2                     | -2,79  | Unknown             |
| 1379450_at   | BM383195  | CTTNBP2 N-terminal like                                | CTTNBP2NL                  | 7,38   | Cytoplasm           |
| 1376877_at   | AA893164  | CUB domain containing protein 1                        | CDCP1                      | 9,52   | Plasma Membrane     |
| 1397247_at   | BI276505  | CUB domain containing protein 1                        | CDCP1                      | 10,34  | Plasma Membrane     |
| 1388464_at   | AI598527  | cullin 7                                               | CUL7 (includes EG:9820)    | -3,53  | Cytoplasm           |
| 1385024_at   | AW535558  | cutC copper transporter homolog (E. coli)              | CUTC                       | -2,53  | Unknown             |
| 1368801_at   | NM_053342 | CXXC finger 4                                          | CXXC4                      | -2,41  | Cytoplasm           |
| 1371953_at   | AI408309  | cyclin G2                                              | CCNG2                      | 4,59   | Nucleus             |
| 1382269_at   | BM388183  | cyclin M2                                              | CNNM2                      | -1,93  | Unknown             |
| 1391270_at   | BE112177  | cyclin M3                                              | CNNM3                      | -2,69  | Unknown             |
| 1384268_at   | AW435305  | cyclin Y-like 1                                        | CCNYL1                     | -12,54 | Unknown             |
| 1372062_at   | BF394161  | cyclin-dependent kinase 2-interacting protein          | CINP                       | -2,01  | Unknown             |
| 1388594_at   | BG371453  | cysteine-rich with EGF-like domains 1                  | CRELD1                     | -2,32  | Unknown             |
| 1396327_at   | BG374493  | cytochrome P450, family 2, subfamily j, polypeptide 12 | CYP2J12                    | 43,48  | Unknown             |

|              |           |                                                                             |                             |       |                     |
|--------------|-----------|-----------------------------------------------------------------------------|-----------------------------|-------|---------------------|
| 1375685_at   | BI282257  | cytoplasmic linker associated protein 1                                     | CLASP1                      | 2,75  | Cytoplasm           |
| 1385369_at   | BI290883  | DAZ interacting protein 1-like                                              | DZIP1L                      | 3,52  | Unknown             |
| 1372434_at   | BE098114  | deafness, autosomal recessive 31                                            | DFNB31                      | 1,80  | Plasma Membrane     |
| 1383432_at   | AI176676  | death associated protein-like 1                                             | DAPL1                       | -3,55 | Unknown             |
| 1385210_at   | BF389450  | dedicator of cytokinesis 5                                                  | DOCK5                       | 4,71  | Unknown             |
| 1374718_at   | AA945915  | deltex 3-like (Drosophila)                                                  | DTX3L                       | 12,22 | Cytoplasm           |
| 1380021_at   | AI059486  | DENN/MADD domain containing 2D                                              | DENND2D                     | 8,54  | Cytoplasm           |
| 1388506_at   | AW144509  | desmoplakin                                                                 | DSP                         | 1,52  | Plasma Membrane     |
| 1371877_at   | BM391502  | dexamethasone-induced transcript                                            | DEXI                        | -1,80 | Unknown             |
| 1372017_at   | BE110572  | diablo homolog (Drosophila)                                                 | DIABLO                      | -1,71 | Cytoplasm           |
| 1374480_at   | BE107255  | dishevelled associated activator of morphogenesis 1                         | DAAM1                       | 1,93  | Cytoplasm           |
| 1387817_at   | NM_024128 | DNA segment on chromosome 4 (unique) 234 expressed sequence                 | D4S234E                     | -2,36 | Cytoplasm           |
| 1399039_at   | BM383865  | DnaJ (Hsp40) homolog, subfamily B, member 2                                 | DNAJB2 (includes EG:3300)   | -2,43 | Nucleus             |
| 1377125_at   | AW523481  | DnaJ (Hsp40) homolog, subfamily C, member 6                                 | DNAJC6                      | -1,70 | Cytoplasm           |
| 1386648_at   | AW914996  | DnaJ (Hsp40) homolog, subfamily C, member 6                                 | DNAJC6                      | -1,60 | Cytoplasm           |
| 1383181_at   | AI704947  | DnaJ (Hsp40) homolog, subfamily C, member 9                                 | DNAJC9                      | -2,18 | Unknown             |
| 1371981_at   | BI294700  | Down syndrome critical region gene 3                                        | DSCR3                       | 1,87  | Nucleus             |
| 1391648_at   | BF545697  | Down syndrome critical region gene 6                                        | DSCR6                       | -5,76 | Unknown             |
| 1376026_at   | AI178243  | downstream neighbor of SON                                                  | DONSON                      | 8,00  | Unknown             |
| 1389483_at   | AI408686  | dpy-19-like 1 (C. elegans)                                                  | DPY19L1                     | -1,93 | Unknown             |
| 1368274_at   | NM_031352 | drebrin-like                                                                | DBNL                        | 3,25  | Cytoplasm           |
| 1387236_at   | NM_053404 | dynactin 4 (p62)                                                            | DCTN4                       | 2,11  | Nucleus             |
| 1373196_at   | BF404514  | EF-hand domain family, member A2                                            | EFHA2                       | -1,84 | Unknown             |
| 1395739_at   | BG672302  | EFR3 homolog A (S. cerevisiae)                                              | EFR3A                       | 2,24  | Plasma Membrane     |
| 1378346_at   | AI385237  | elastin microfibril interfacier 2                                           | EMILIN2                     | 3,07  | Extracellular Space |
| 1370017_at   | NM_012948 | emerin                                                                      | EMD                         | -2,02 | Nucleus             |
| 1367861_at   | NM_024147 | Enah/Vasp-like                                                              | EVL                         | -3,79 | Cytoplasm           |
| 1389319_at   | AA800719  | endoplasmic reticulum-golgi intermediate compartment (ERGIC) 1              | ERGIC1                      | -1,83 | Cytoplasm           |
| 1374585_at   | AW915152  | enoyl Coenzyme A hydratase domain containing 1                              | ECHDC1                      | -1,81 | Unknown             |
| 1372654_at   | BI285918  | EPS8-like 2                                                                 | EPS8L2                      | 1,96  | Unknown             |
| 1392223_at   | AW521110  | epsin 2                                                                     | EPN2                        | 1,54  | Cytoplasm           |
| 1370875_at   | AA851304  | ezrin                                                                       | EZR                         | 5,76  | Plasma Membrane     |
| 1387279_at   | NM_053796 | F11 receptor                                                                | F11R                        | 2,27  | Plasma Membrane     |
| 1376708_at   | BM385170  | family with sequence similarity 115, member C                               | FAM115C                     | 11,63 | Unknown             |
| 1385950_at   | AI454926  | family with sequence similarity 131, member B                               | FAM131B                     | 3,78  | Unknown             |
| 1373011_at   | BE109520  | family with sequence similarity 134, member B                               | FAM134B                     | 1,86  | Unknown             |
| 1376155_at   | BE113295  | family with sequence similarity 151, member B                               | FAM151B                     | 2,28  | Unknown             |
| 1393443_a_at | AW434918  | family with sequence similarity 158, member A                               | FAM158A                     | -5,64 | Plasma Membrane     |
| 1377848_at   | AW535219  | family with sequence similarity 175, member A                               | FAM175A                     | -2,83 | Unknown             |
| 1380102_at   | BM386836  | family with sequence similarity 50, member A                                | FAM50A                      | -2,07 | Nucleus             |
| 1372302_at   | BF284897  | family with sequence similarity 82, member A2                               | FAM82A2                     | 4,11  | Unknown             |
| 1384457_at   | AI030755  | F-box and WD-40 domain protein 17                                           | FBXW17                      | 7,01  | Unknown             |
| 1373588_at   | H33457    | FERM domain containing 8                                                    | FRMD8                       | 2,89  | Unknown             |
| 1382143_at   | AA964898  | FERM, RhoGEF (ARHGEF) and pleckstrin domain protein 1 (chondrocyte-derived) | FARP1                       | 3,71  | Unknown             |
| 1398327_at   | BM386598  | fermitin family homolog 2 (Drosophila)                                      | FERMT2                      | 2,34  | Cytoplasm           |
| 1379463_at   | AW525176  | filamin A interacting protein 1                                             | FILIP1                      | -4,48 | Cytoplasm           |
| 1373286_at   | AA875261  | filamin binding LIM protein 1                                               | FBLIM1                      | 3,16  | Plasma Membrane     |
| 1388684_at   | BI274480  | formin binding protein 4                                                    | FNBP4                       | 2,29  | Nucleus             |
| 1391411_at   | AI179941  | formin-like 2                                                               | FMNL2 (includes EG:114793)  | 7,66  | Cytoplasm           |
| 1371951_at   | AA800031  | four and a half LIM domains 2                                               | FHL2                        | 37,15 | Nucleus             |
| 1375961_at   | AI072892  | frizzled-related protein                                                    | FRZB                        | -2,24 | Extracellular Space |
| 1389015_at   | AI171982  | FUN14 domain containing 2                                                   | FUNDC2 (includes EG:67391)  | -2,87 | Unknown             |
| 1381882_at   | AI072357  | FYVE, RhoGEF and PH domain containing 6                                     | FGD6                        | 17,94 | Cytoplasm           |
| 1383255_at   | BE116202  | G patch domain and KOW motifs                                               | GPKOW                       | 2,39  | Unknown             |
| 1382186_a_at | AI136314  | G patch domain containing 4                                                 | GPATCH4                     | -4,66 | Unknown             |
| 1388395_at   | AI406939  | G0/G1switch 2                                                               | G0S2                        | 6,74  | Unknown             |
| 1374533_at   | AI234190  | GA repeat binding protein, beta 1                                           | GABPB1 (includes EG:499883) | 2,69  | Unknown             |
| 1373515_at   | BI275737  | galectin-related protein                                                    | HSPC159                     | -1,87 | Unknown             |

|              |           |                                                                  |                          |        |                     |
|--------------|-----------|------------------------------------------------------------------|--------------------------|--------|---------------------|
| 1374848_at   | AI599867  | general transcription factor IIIC, polypeptide 6, alpha 35kDa    | GTF3C6                   | -1,91  | Unknown             |
| 1375960_at   | BF281879  | germ cell-less homolog 1 (Drosophila)                            | GMCL1                    | -2,17  | Nucleus             |
| 1380410_at   | AI043958  | GLI pathogenesis-related 2                                       | GLIPR2                   | 25,60  | Cytoplasm           |
| 1392320_s_at | AI763657  | glomulin, FKBP associated protein                                | GLMN                     | -2,69  | Cytoplasm           |
| 1395623_at   | AW521959  | glutaminy-peptide cyclotransferase-like                          | QPCTL                    | -2,73  | Unknown             |
| 1388526_at   | AI169075  | glutathione transferase zeta 1                                   | LOC681913                | -3,64  | Unknown             |
| 1372383_at   | AW435429  | G-protein signaling modulator 1 (AGS3-like, C. elegans)          | GPSM1                    | -9,18  | Cytoplasm           |
| 1399167_a_at | BI278183  | GRB2-associated binding protein 1                                | GAB1                     | 3,29   | Cytoplasm           |
| 1368909_a_at | NM_053807 | GRIP1 associated protein 1                                       | GRIPAP1                  | 1,77   | Plasma Membrane     |
| 1372016_at   | BI287978  | growth arrest and DNA-damage-inducible, beta                     | GADD45B                  | 44,52  | Cytoplasm           |
| 1388792_at   | AI599423  | growth arrest and DNA-damage-inducible, gamma                    | GADD45G                  | 3,85   | Nucleus             |
| 1392482_at   | BF409567  | GrpE-like 2, mitochondrial (E. coli)                             | GRPEL2                   | 3,75   | Cytoplasm           |
| 1373572_at   | BF282247  | GTP binding protein 5 (putative)                                 | GTPBP5                   | -3,18  | Unknown             |
| 1398615_at   | BG379594  | GTPase activating Rap/RanGAP domain-like 4                       | GARNL4                   | 2,09   | Unknown             |
| 1376285_at   | BM390519  | GULP, engulfment adaptor PTB domain containing 1                 | GULP1                    | -3,93  | Cytoplasm           |
| 1374957_at   | AI408197  | hCG21078                                                         | HCG 21078                | -2,41  | Unknown             |
| 1386894_at   | NM_022229 | heat shock 60kDa protein 1 (chaperonin)                          | HSPD1                    | -1,91  | Cytoplasm           |
| 1387898_at   | D29960    | heat shock protein, alpha-crystallin-related, B6                 | HSPB6                    | -2,38  | Cytoplasm           |
| 1384882_at   | AI229056  | HECT domain containing 2                                         | HECTD2                   | 3,18   | Unknown             |
| 1386795_at   | BF291091  | HEPACAM family member 2                                          | HEPACAM2                 | -1,53  | Unknown             |
| 1373228_at   | BI288760  | heparan-alpha-glucosaminide N-acetyltransferase                  | HGSNAT                   | -3,36  | Unknown             |
| 1372693_at   | AI408833  | heterogeneous nuclear ribonucleoprotein A1 pseudogene            | HCG 2023776              | 1,58   | Cytoplasm           |
| 1372810_at   | BF281256  | heterogeneous nuclear ribonucleoprotein D-like                   | HNRPDL                   | 1,50   | Nucleus             |
| 1375019_at   | AI101886  | heterogeneous nuclear ribonucleoprotein H3 (2H9)                 | HNRNPH3                  | 1,96   | Nucleus             |
| 1371887_at   | BF398549  | high-mobility group box 3                                        | HMGB3                    | -2,32  | Nucleus             |
| 1371765_at   | AA850895  | histone cluster 3, H2a                                           | HIST3H2A                 | -1,97  | Unknown             |
| 1389132_at   | AW253339  | huntingtin interacting protein 1                                 | HIP1                     | -1,56  | Cytoplasm           |
| 1389665_at   | BG375619  | hyaluronan binding protein 4                                     | HABP4                    | -3,37  | Cytoplasm           |
| 1371736_at   | AI411283  | hypothetical gene supported by BC032431                          | LOC389203                | -2,83  | Unknown             |
| 1372850_at   | AA799464  | hypothetical LOC100151767                                        | LOC100151767             | 1,81   | Unknown             |
| 1393050_at   | BG664069  | hypothetical LOC302495                                           | LOC302495                | 2,91   | Unknown             |
| 1390895_at   | AA957047  | hypothetical LOC302495                                           | LOC302495                | 3,27   | Unknown             |
| 1390146_at   | BF414998  | hypothetical LOC441027                                           | FLJ12993                 | -2,09  | Unknown             |
| 1381757_at   | AA965058  | hypothetical protein LOC51057                                    | LOC51057                 | -1,81  | Unknown             |
| 1377626_at   | AA924350  | hypothetical protein LOC686634                                   | LOC686634                | 389,40 | Unknown             |
| 1393234_at   | BI285850  | hypothetical protein LOC687105                                   | LOC687105                | 10,76  | Unknown             |
| 1376625_at   | BI296015  | hypothetical protein LOC691862                                   | LOC691862                | 1,91   | Unknown             |
| 1373688_at   | AA849532  | hypothetical protein LOC84792                                    | MGC12966                 | -1,51  | Unknown             |
| 1372420_at   | AI408084  | hypothetical protein MGC12972                                    | FKSG24                   | -1,69  | Unknown             |
| 1389355_at   | BF285187  | immediate early response 5                                       | IER5                     | 9,03   | Unknown             |
| 1391489_at   | AI407339  | immunity-related GTPase family, M                                | IRGM                     | 234,10 | Cytoplasm           |
| 1394293_at   | BG664973  | IMP1 inner mitochondrial membrane peptidase-like (S. cerevisiae) | IMMP1L                   | -1,66  | Unknown             |
| 1388321_at   | BG378108  | IMP3, U3 small nucleolar ribonucleoprotein, homolog (yeast)      | IMP3                     | -2,53  | Cytoplasm           |
| 1385423_at   | AW521399  | inner membrane protein, mitochondrial (mitofilin)                | IMMT                     | -1,89  | Cytoplasm           |
| 1389176_at   | BF282674  | inositol polyphosphate-5-phosphatase F                           | INPP5F                   | -2,00  | Unknown             |
| 1381014_at   | BI274623  | interferon-induced protein 44                                    | IFI44                    | 9,80   | Cytoplasm           |
| 1379748_at   | AA819629  | interferon-induced protein 44-like                               | IFI44L                   | 19,81  | Unknown             |
| 1384180_at   | BE118697  | interferon-induced protein with tetratricopeptide repeats 2      | IFIT2                    | 13,50  | Unknown             |
| 1369031_at   | NM_053374 | interleukin 18 binding protein                                   | IL18BP                   | 15,74  | Extracellular Space |
| 1375915_at   | AI073247  | interleukin-1 receptor-associated kinase 1 binding protein 1     | IRAK1BP1                 | -3,00  | Unknown             |
| 1394234_x_at | AA848540  | IQ motif and WD repeats 1                                        | IQWD1                    | -2,04  | Nucleus             |
| 1388613_at   | BE113034  | iron-sulfur cluster assembly 1 homolog (S. cerevisiae)-like      | ISCA1L                   | -1,92  | Cytoplasm           |
| 1382314_at   | BE096523  | ISG15 ubiquitin-like modifier                                    | ISG15 (includes EG:9636) | 179,79 | Extracellular Space |
| 1367787_at   | NM_030844 | islet cell autoantigen 1, 69kDa                                  | ICA1                     | -2,17  | Cytoplasm           |
| 1389478_at   | BM392031  | kelch-like 22 (Drosophila)                                       | KLHL22                   | -2,34  | Unknown             |
| 1377209_at   | BI283664  | kelch-like 25 (Drosophila)                                       | KLHL25                   | -1,55  | Cytoplasm           |
| 1391805_at   | BE096676  | kelch-like 32 (Drosophila)                                       | KLHL32                   | 1,85   | Unknown             |
| 1372812_at   | H33148    | KIAA0256 gene product                                            | KIAA0256                 | 1,83   | Unknown             |

|              |           |                                                                                       |                            |        |                     |
|--------------|-----------|---------------------------------------------------------------------------------------|----------------------------|--------|---------------------|
| 1374037_at   | BI288699  | KIAA0391                                                                              | KIAA0391                   | -1,69  | Unknown             |
| 1384128_at   | BF393261  | KIAA0562                                                                              | KIAA0562                   | -2,12  | Unknown             |
| 1375853_at   | BF284358  | KIAA1033                                                                              | KIAA1033                   | 2,36   | Unknown             |
| 1392838_at   | BF398054  | KIAA1033                                                                              | KIAA1033                   | 2,77   | Unknown             |
| 1393352_at   | BI293882  | KIAA1370                                                                              | KIAA1370                   | -1,56  | Unknown             |
| 1373300_at   | BI296249  | KIAA1467                                                                              | KIAA1467                   | -1,86  | Unknown             |
| 1397714_at   | BF565706  | KIAA1468                                                                              | KIAA1468                   | 1,91   | Unknown             |
| 1375873_at   | AI231506  | KIAA1522                                                                              | KIAA1522                   | 2,03   | Unknown             |
| 1384133_at   | BF522755  | kinesin family member 1A                                                              | KIF1A                      | -1,64  | Cytoplasm           |
| 1372516_at   | AI317842  | kinesin family member 22                                                              | KIF22                      | -2,50  | Nucleus             |
| 1376451_at   | BG377849  | KRIT1, ankyrin repeat containing                                                      | KRIT1                      | 1,56   | Plasma Membrane     |
| 1374006_at   | BI295878  | kynurenine aminotransferase III                                                       | KAT3                       | 2,39   | Unknown             |
| 1392746_x_at | BF394189  | La ribonucleoprotein domain family, member 1                                          | LARP1                      | 1,50   | Unknown             |
| 1373422_at   | BE108280  | La ribonucleoprotein domain family, member 1                                          | LARP1                      | 1,51   | Unknown             |
| 1379340_at   | BM385282  | laminin, gamma 2                                                                      | LAMC2                      | 14,21  | Extracellular Space |
| 1391565_at   | AA899663  | large subunit GTPase 1 homolog (S. cerevisiae)                                        | LSG1                       | -3,83  | Cytoplasm           |
| 1369716_s_at | NM_012976 | lectin, galactose binding, soluble 5                                                  | LGALS5                     | 6,37   | Unknown             |
| 1386879_at   | NM_031832 | lectin, galactoside-binding, soluble, 3                                               | LGALS3                     | 3,43   | Extracellular Space |
| 1392901_at   | BM385213  | leucine rich repeat containing 1                                                      | LRRC1                      | 2,59   | Cytoplasm           |
| 1391601_at   | AA964579  | leucine rich repeat neuronal 2                                                        | LRRN2                      | -3,02  | Plasma Membrane     |
| 1390667_at   | BF408543  | leucine rich transmembrane and 0-methyltransferase domain containing                  | LRTOMT                     | -1,88  | Unknown             |
| 1373500_at   | BI294727  | leucine-rich PPR-motif containing                                                     | LRPPRC                     | -2,27  | Cytoplasm           |
| 1378633_at   | BE106297  | leupaxin                                                                              | LPXN                       | 1,55   | Cytoplasm           |
| 1383906_at   | BF416847  | likely ortholog of mouse lung-inducible Neutralized-related C3HC4 RING domain protein | LINCR                      | 178,20 | Unknown             |
| 1383863_at   | BF288303  | LIM domain only 2 (rhombotin-like 1)                                                  | LMO2                       | 9,16   | Nucleus             |
| 1372443_at   | AI409038  | low density lipoprotein receptor-related protein 11                                   | LRP11                      | 2,60   | Unknown             |
| 1382277_at   | AA894336  | lymphocyte antigen 96                                                                 | LY96                       | 5,71   | Plasma Membrane     |
| 1376436_at   | AI071181  | LysM, putative peptidoglycan-binding, domain containing 3                             | LYSMD3                     | 1,67   | Unknown             |
| 1372966_at   | AI178784  | major facilitator superfamily domain containing 2                                     | MFSD2                      | -2,68  | Unknown             |
| 1367925_at   | NM_022715 | major vault protein                                                                   | MVP                        | 2,51   | Nucleus             |
| 1383484_at   | AW920193  | male-specific lethal 2 homolog (Drosophila)                                           | MSL2                       | 1,50   | Unknown             |
| 1391280_at   | AW529333  | malignant T cell amplified sequence 2                                                 | MCTS2                      | -2,56  | Unknown             |
| 1389306_at   | BM387419  | matrilin 2                                                                            | MATN2                      | -3,12  | Extracellular Space |
| 1382522_at   | AI169689  | matrin 3                                                                              | MATR3                      | 3,55   | Nucleus             |
| 1382417_at   | AI236886  | Mdm4 p53 binding protein homolog (mouse)                                              | MDM4                       | 1,50   | Nucleus             |
| 1395316_at   | H32543    | melanoma antigen family H, 1                                                          | MAGEH1                     | -2,49  | Cytoplasm           |
| 1375430_at   | BM389077  | membrane magnesium transporter 2                                                      | MMGT2                      | -12,70 | Unknown             |
| 1388491_at   | AI234849  | membrane-associated ring finger (C3HC4) 5                                             | MARCH5                     | 1,65   | Unknown             |
| 1385790_at   | BF560024  | membrane-associated ring finger (C3HC4) 5                                             | MARCH5                     | 1,92   | Unknown             |
| 1368441_at   | NM_031658 | mesothelin                                                                            | MSLN                       | -1,53  | Extracellular Space |
| 1391857_at   | AI044397  | mesothelin-like                                                                       | MSLNL                      | -2,06  | Unknown             |
| 1388271_at   | BM383531  | metallothionein 1E                                                                    | MT1E                       | 5,78   | Cytoplasm           |
| 1379059_at   | BG373522  | MICAL-like 2                                                                          | MICALL2                    | 35,07  | Cytoplasm           |
| 1367882_at   | NM_030995 | microtubule-associated protein 1A                                                     | MAP1A                      | -2,20  | Cytoplasm           |
| 1377103_at   | AW525765  | midnolin                                                                              | MIDN                       | -1,73  | Nucleus             |
| 1382289_at   | BI291954  | mindbomb homolog 1 (Drosophila)                                                       | MIB1                       | -1,76  | Cytoplasm           |
| 1393085_at   | BI290341  | MIT, microtubule interacting and transport, domain containing 1                       | MITD1                      | 3,14   | Unknown             |
| 1371474_at   | BG665132  | mitochondrial carrier homolog 1 (C. elegans)                                          | MTCH1                      | -1,62  | Cytoplasm           |
| 1396209_at   | BE117343  | mitochondrial carrier triple repeat 1-like                                            | MCART1L                    | -4,68  | Unknown             |
| 1373705_at   | AI235502  | mitochondrial ribosomal protein L28                                                   | MRPL28                     | -1,92  | Cytoplasm           |
| 1371553_at   | BF288120  | mitochondrial ribosomal protein L36                                                   | MRPL36                     | -5,29  | Cytoplasm           |
| 1371853_at   | AI176602  | mitochondrial ribosomal protein L42                                                   | MRPL42 (includes EG:28977) | -2,32  | Cytoplasm           |
| 1372116_at   | AI008955  | mitochondrial ribosomal protein S2                                                    | MRPS2                      | -2,01  | Cytoplasm           |
| 1367526_at   | AI180224  | mitochondrial ribosomal protein S26                                                   | MRPS26                     | -2,38  | Cytoplasm           |
| 1371576_at   | AW142276  | mitochondrial ribosomal protein S36                                                   | MRPS36                     | -2,24  | Cytoplasm           |
| 1397748_at   | AW521583  | mitochondrial rRNA methyltransferase 1 homolog (S. cerevisiae)                        | MRM1                       | -1,95  | Unknown             |
| 1392133_at   | AI502069  | mitogen-activated protein kinase 1 interacting protein 1-like                         | MAPK1IP1L                  | 3,09   | Nucleus             |
| 1369915_at   | NM_139186 | MKI67 (FHA domain) interacting nucleolar phosphoprotein                               | MKI67IP                    | -1,97  | Nucleus             |



|              |           |                                                                                                 |                            |        |                     |
|--------------|-----------|-------------------------------------------------------------------------------------------------|----------------------------|--------|---------------------|
| 1372904_at   | BI285628  | MOB1, Mps One Binder kinase activator-like 2A (yeast)                                           | MOBK2A                     | 5,09   | Unknown             |
| 1390142_at   | BE111888  | MORC family CW-type zinc finger 3                                                               | MORC3                      | 2,46   | Nucleus             |
| 1371990_at   | AI012242  | MPN domain containing                                                                           | MPND (includes EG:681944)  | -5,44  | Unknown             |
| 1385427_at   | BE118330  | musashi homolog 2 (Drosophila)                                                                  | MSI2                       | 1,52   | Cytoplasm           |
| 1380541_at   | AA957801  | musashi homolog 2 (Drosophila)                                                                  | MSI2                       | 1,71   | Cytoplasm           |
| 1375908_at   | BI282616  | myelin protein zero-like 2                                                                      | MPZL2                      | 3,57   | Plasma Membrane     |
| 1371692_at   | AI009661  | myeloid/lymphoid or mixed-lineage leukemia (trithorax homolog, Drosophila); translocated to, 11 | MLLT11                     | -3,13  | Unknown             |
| 1374752_at   | AI408734  | MyoD family inhibitor domain containing                                                         | MDFIC                      | 3,21   | Nucleus             |
| 1388114_at   | X05566    | myosin regulatory light chain MRLC2                                                             | MRLC2                      | 1,66   | Cytoplasm           |
| 1370478_at   | AY004215  | myosin XVI                                                                                      | MYO16                      | -8,09  | Cytoplasm           |
| 1370158_at   | AA946388  | myosin, heavy chain 10, non-muscle                                                              | MYH10                      | -2,45  | Cytoplasm           |
| 1370229_at   | BG666709  | NDRG family member 4                                                                            | NDRG4                      | -1,88  | Unknown             |
| 1394181_at   | AI176506  | necdin-like 2                                                                                   | NDNL2                      | -1,55  | Nucleus             |
| 1390514_at   | BI295160  | NEDD4 binding protein 2-like 2                                                                  | N4BP2L2                    | 1,57   | Unknown             |
| 1373775_at   | AI232313  | negative regulator of ubiquitin-like proteins 1                                                 | NUB1                       | 3,99   | Nucleus             |
| 1372953_at   | AI101330  | neurocalcin delta                                                                               | NCALD                      | -4,20  | Cytoplasm           |
| 1370815_at   | AF031879  | neurofilament, heavy polypeptide                                                                | NEFH                       | -3,66  | Cytoplasm           |
| 1367845_at   | NM_017029 | neurofilament, medium polypeptide                                                               | NEFM                       | 2,31   | Cytoplasm           |
| 1370517_at   | U18772    | neuronal pentraxin I                                                                            | NPTX1                      | -10,49 | Extracellular Space |
| 1395083_at   | AA926313  | neuro-oncological ventral antigen 1                                                             | NOVA1                      | -2,93  | Nucleus             |
| 1368255_at   | NM_017354 | neurotrimin                                                                                     | HNT                        | -6,01  | Plasma Membrane     |
| 1398610_at   | BG375744  | nicolin 1                                                                                       | NICN1 (includes EG:619581) | -1,83  | Unknown             |
| 1384801_at   | AA963592  | Nipped-B homolog (Drosophila)                                                                   | NIPBL                      | 1,86   | Nucleus             |
| 1373509_at   | BE113288  | NOL1/NOP2/Sun domain family, member 4                                                           | NSUN4                      | -1,76  | Unknown             |
| 1383774_at   | BG376677  | non-protein coding RNA 117                                                                      | NCRNA00117                 | -2,82  | Unknown             |
| 1383752_at   | BG375714  | NOP2 nucleolar protein homolog (yeast)                                                          | NOP2                       | -1,57  | Nucleus             |
| 1389538_at   | AW672589  | nuclear factor of kappa light polypeptide gene enhancer in B-cells inhibitor, alpha             | NFKBIA                     | 55,16  | Cytoplasm           |
| 1395081_at   | BI290843  | nuclear receptor coactivator 7                                                                  | NCOA7                      | 2,69   | Nucleus             |
| 1383938_at   | BI286738  | nuclear receptor coactivator 7                                                                  | NCOA7                      | 2,81   | Nucleus             |
| 1383673_at   | BI288925  | nucleosome assembly protein 1-like 2                                                            | NAP1L2                     | -3,52  | Nucleus             |
| 1375861_at   | BE111332  | nucleosome assembly protein 1-like 5                                                            | NAP1L5                     | -6,22  | Unknown             |
| 1379743_at   | BF397271  | nucleotide binding protein 2 (MinD homolog, E. coli)                                            | NUBP2                      | 1,69   | Nucleus             |
| 1370618_at   | AB069907  | optineurin                                                                                      | OPTN                       | 2,61   | Cytoplasm           |
| 1388432_at   | BI294994  | optineurin                                                                                      | OPTN                       | 3,13   | Cytoplasm           |
| 1384254_at   | AI717553  | OTU domain containing 1                                                                         | OTUD1                      | 5,44   | Unknown             |
| 1367869_at   | NM_057153 | oxidation resistance 1                                                                          | OXR1                       | -2,56  | Cytoplasm           |
| 1393368_at   | BG372522  | oxysterol binding protein-like 5                                                                | OSBPL5                     | 2,44   | Cytoplasm           |
| 1384465_at   | AI136693  | paraspeckle component 1                                                                         | PSPC1                      | -2,89  | Nucleus             |
| 1373748_at   | AW532566  | PDZ domain containing ring finger 3                                                             | PDZRN3                     | -7,74  | Extracellular Space |
| 1368303_at   | NM_031678 | period homolog 2 (Drosophila)                                                                   | PER2                       | 3,14   | Nucleus             |
| 1379536_at   | BF547014  | pleckstrin homology domain containing, family A member 6                                        | PLEKHA6                    | 1,80   | Unknown             |
| 1375767_at   | BI287681  | pleckstrin homology domain containing, family G (with RhoGef domain) member 3                   | PLEKHG3                    | 3,66   | Unknown             |
| 1380867_a_at | BM383086  | pleckstrin homology domain containing, family M (with RUN domain) member 1                      | PLEKHM1                    | 3,01   | Cytoplasm           |
| 1378106_at   | AI029402  | pleckstrin homology-like domain, family A, member 2                                             | PHLDA2                     | 3,78   | Cytoplasm           |
| 1379724_at   | BE103244  | pleckstrin homology-like domain, family B, member 2                                             | PHLDB2                     | -3,85  | Cytoplasm           |
| 1380071_at   | BI285978  | poly (ADP-ribose) polymerase family, member 12                                                  | PARP12                     | 7,04   | Nucleus             |
| 1379613_at   | BM390301  | poly (ADP-ribose) polymerase family, member 14                                                  | PARP14                     | 22,99  | Cytoplasm           |
| 1372034_at   | BF284106  | poly (ADP-ribose) polymerase family, member 14                                                  | PARP14                     | 23,41  | Cytoplasm           |
| 1377970_at   | BE105494  | poly (ADP-ribose) polymerase family, member 8                                                   | PARP8                      | 6,91   | Unknown             |
| 1376144_at   | AA819679  | poly (ADP-ribose) polymerase family, member 9                                                   | PARP9                      | 27,68  | Nucleus             |
| 1382922_at   | BG375109  | poly(A) binding protein, nuclear 1                                                              | PABPN1                     | -2,05  | Nucleus             |
| 1374326_at   | AI178019  | PPAN-P2RY11 readthrough transcript                                                              | PPAN-P2RY11                | -1,70  | Nucleus             |
| 1383326_a_at | AI576297  | programmed cell death 4 (neoplastic transformation inhibitor)                                   | PDCD4                      | -1,81  | Nucleus             |
| 1370381_at   | U61729    | proline-rich nuclear receptor coactivator 1                                                     | PNRC1                      | 1,91   | Nucleus             |
| 1377744_at   | BF392982  | proline-serine-threonine phosphatase interacting protein 2                                      | PSTPIP2                    | 2,56   | Cytoplasm           |
| 1367663_at   | NM_017264 | proteasome (prosome, macropain) activator subunit 1 (PA28 alpha)                                | PSME1                      | 2,98   | Cytoplasm           |
| 1399051_at   | BE104409  | protein associated with topoisomerase II homolog 1 (yeast)                                      | PATL1                      | 1,67   | Unknown             |
| 1387398_at   | AA996685  | protein kinase (cAMP-dependent, catalytic) inhibitor alpha                                      | PKIA                       | 2,53   | Unknown             |

|              |           |                                                                                                                  |                            |        |                     |
|--------------|-----------|------------------------------------------------------------------------------------------------------------------|----------------------------|--------|---------------------|
| 1386971_at   | NM_022951 | protein phosphatase 1, regulatory (inhibitor) subunit 10                                                         | PPP1R10                    | -1,69  | Nucleus             |
| 1393082_at   | AI0444747 | protein phosphatase 1, regulatory (inhibitor) subunit 14C                                                        | PPP1R14C                   | 3,03   | Cytoplasm           |
| 1372088_at   | AI012434  | PTPRF interacting protein, binding protein 1 (liprin beta 1)                                                     | PPFIBP1                    | 2,78   | Plasma Membrane     |
| 1390647_at   | AI410924  | putative homeodomain transcription factor 2                                                                      | PHTF2                      | -2,88  | Cytoplasm           |
| 1383786_at   | AW915417  | RAB32, member RAS oncogene family                                                                                | RAB32                      | 3,15   | Cytoplasm           |
| 1392762_at   | BF559727  | RAD18 homolog (S. cerevisiae)                                                                                    | RAD18                      | -1,56  | Nucleus             |
| 1383825_at   | AW527313  | radixin                                                                                                          | RDX                        | -2,12  | Cytoplasm           |
| 1396207_at   | BF565167  | radixin                                                                                                          | RDX                        | -1,65  | Cytoplasm           |
| 1376029_at   | BI295991  | ral guanine nucleotide dissociation stimulator-like 2                                                            | RGL2                       | 10,94  | Cytoplasm           |
| 1374750_at   | AII172313 | Rap guanine nucleotide exchange factor (GEF) 6                                                                   | RAPGEF6                    | 2,26   | Plasma Membrane     |
| 1374525_at   | BF284017  | Ras association (RalGDS/AF-6) and pleckstrin homology domains 1                                                  | RAPH1                      | 5,61   | Plasma Membrane     |
| 1376658_at   | BF391087  | Ras association (RalGDS/AF-6) and pleckstrin homology domains 1                                                  | RAPH1                      | 10,03  | Plasma Membrane     |
| 1374165_at   | AA818264  | RAS p21 protein activator 4                                                                                      | RASA4 (includes EG:10156)  | 5,07   | Cytoplasm           |
| 1379285_at   | AA819788  | receptor (chemosensory) transporter protein 4                                                                    | RTP4                       | 17,23  | Plasma Membrane     |
| 1389066_at   | BI274408  | regulator of calcineurin 2                                                                                       | RCAN2                      | -11,89 | Unknown             |
| 1373777_at   | BF391820  | regulator of G-protein signaling 16                                                                              | RGS16                      | -3,31  | Cytoplasm           |
| 1370910_at   | BF283113  | replication factor C (activator 1) 2, 40kDa                                                                      | RFC2                       | -3,02  | Nucleus             |
| 1389053_at   | AII171280 | required for meiotic nuclear division 1 homolog (S. cerevisiae)                                                  | RMND1                      | 1,68   | Unknown             |
| 1383533_at   | AI715743  | REST corepressor 3                                                                                               | RCOR3 (includes EG:684192) | 2,11   | Unknown             |
| 1387081_at   | NM_017132 | reticulocalbin 2, EF-hand calcium binding domain                                                                 | RCN2                       | 2,08   | Cytoplasm           |
| 1368097_a_at | NM_053865 | reticulum 1                                                                                                      | RTN1                       | -2,38  | Cytoplasm           |
| 1372690_at   | AII137471 | reticulum 4 receptor-like 1                                                                                      | RTN4RL1                    | -2,76  | Plasma Membrane     |
| 1393404_at   | BF554746  | reticulum 4 receptor-like 1                                                                                      | RTN4RL1                    | -2,38  | Plasma Membrane     |
| 1368403_at   | NM_031094 | retinoblastoma-like 2 (p130)                                                                                     | RBL2                       | -2,80  | Nucleus             |
| 1374852_at   | AI407613  | RGD1559909                                                                                                       | RGD1559909                 | -1,96  | Unknown             |
| 1395249_at   | BF400750  | RGD1563912                                                                                                       | RGD1563912                 | -3,20  | Unknown             |
| 1375305_at   | BI282028  | RGD1563912                                                                                                       | RGD1563912                 | -2,35  | Unknown             |
| 1388900_at   | BG381414  | RGD1566118                                                                                                       | RGD1566118                 | 1,76   | Unknown             |
| 1372585_at   | BM388445  | RGD1566254                                                                                                       | RGD1566254                 | 975,78 | Unknown             |
| 1387035_a_at | NM_022244 | Rho GTPase activating protein 17                                                                                 | ARHGAP17                   | 2,86   | Cytoplasm           |
| 1396575_at   | AI576265  | Rho GTPase activating protein 20                                                                                 | ARHGAP20                   | -1,78  | Unknown             |
| 1376501_at   | AA945062  | Rho GTPase activating protein 8                                                                                  | ARHGAP8                    | 6,84   | Cytoplasm           |
| 1381297_at   | BI292668  | Rho guanine nucleotide exchange factor (GEF) 5                                                                   | ARHGEF5                    | 12,95  | Cytoplasm           |
| 1384765_at   | BI289371  | rhomboid 5 homolog 2 (Drosophila)                                                                                | RHBDF2                     | 13,23  | Unknown             |
| 1384483_at   | BI274216  | RIKEN cDNA 9530082P21 gene                                                                                       | 9530082P21RIK              | 11,40  | Unknown             |
| 1385016_at   | AI136882  | RIKEN cDNA B630019K06 gene                                                                                       | B630019K06RIK              | -4,92  | Unknown             |
| 1383951_at   | BE108661  | ring finger protein 145                                                                                          | RNF145                     | -2,26  | Unknown             |
| 1379441_at   | AA965092  | ring finger protein 160                                                                                          | ZNF294                     | -1,64  | Nucleus             |
| 1393547_at   | BE101549  | ring finger protein 182                                                                                          | RNF182                     | -4,49  | Unknown             |
| 1382074_at   | AII13237  | ring finger protein 19B                                                                                          | RNF19B                     | 6,73   | Unknown             |
| 1377746_at   | AI010418  | RNA binding motif protein 12                                                                                     | RBM12                      | -2,24  | Nucleus             |
| 1393832_at   | AII136337 | RNA binding motif protein 43                                                                                     | RBM43                      | 11,88  | Unknown             |
| 1376307_a_at | BI289591  | RNA binding motif protein 45                                                                                     | RBM45                      | -1,71  | Cytoplasm           |
| 1380334_at   | AI555044  | RNA binding motif protein 47                                                                                     | RBM47                      | 1,98   | Unknown             |
| 1394155_at   | AI010943  | RNA binding motif protein 7                                                                                      | RBM7                       | 2,86   | Unknown             |
| 1374181_at   | BF290678  | RNA binding motif protein, X-linked                                                                              | RBMX                       | -2,71  | Nucleus             |
| 1375870_a_at | BF420140  | RNA binding motif, single stranded interacting protein 1                                                         | RBMS1                      | 6,17   | Nucleus             |
| 1374647_at   | BI299718  | round spermatid basic protein 1                                                                                  | RSBN1                      | 1,74   | Unknown             |
| 1376065_at   | AI058889  | RRS1 ribosome biogenesis regulator homolog (S. cerevisiae)                                                       | RRS1                       | -1,83  | Nucleus             |
| 1376879_at   | AI716916  | RWD domain containing 4A                                                                                         | RWDD4A                     | -2,16  | Unknown             |
| 1386890_at   | NM_031114 | S100 calcium binding protein A10                                                                                 | S100A10                    | 3,08   | Cytoplasm           |
| 1375170_at   | BG378926  | S100 calcium binding protein A11                                                                                 | S100A11                    | 6,11   | Cytoplasm           |
| 1372741_at   | AI412013  | saccharopine dehydrogenase (putative)                                                                            | SCCPDH                     | -1,98  | Cytoplasm           |
| 1368129_at   | NM_031647 | Scm-like with four mbt domains 1                                                                                 | SFMBT1                     | 8,84   | Nucleus             |
| 1368806_at   | AA799627  | selenoprotein P, plasma, 1                                                                                       | SEPP1                      | -2,12  | Extracellular Space |
| 1376319_at   | BM390322  | sema domain, immunoglobulin domain (Ig), short basic domain, secreted, (semaphorin) 3C                           | SEMA3C                     | 2,03   | Extracellular Space |
| 1388745_at   | AI228417  | sema domain, immunoglobulin domain (Ig), transmembrane domain (TM) and short cytoplasmic domain, (semaphorin) 4A | SEMA4A                     | 20,56  | Plasma Membrane     |
| 1383290_at   | BI280343  | serine peptidase inhibitor, Kunitz type 1                                                                        | SPINT1                     | 2,20   | Extracellular Space |

|              |           |                                                                                                                                     |                              |       |                     |
|--------------|-----------|-------------------------------------------------------------------------------------------------------------------------------------|------------------------------|-------|---------------------|
| 1377914_at   | AI059437  | serine/arginine repetitive matrix 1                                                                                                 | SRRM1                        | 2,01  | Nucleus             |
| 1368224_at   | NM_031531 | serpin peptidase inhibitor, clade A (alpha-1 antiproteinase, antitrypsin), member 3                                                 | SERPINA3                     | 3,30  | Extracellular Space |
| 1373672_at   | BM384419  | serpin peptidase inhibitor, clade B (ovalbumin), member 9                                                                           | SERPINB9                     | 6,65  | Cytoplasm           |
| 1372254_at   | AW915763  | serpin peptidase inhibitor, clade G (C1 inhibitor), member 1                                                                        | SERPING1                     | 19,18 | Extracellular Space |
| 1378705_at   | AW254450  | SET domain containing 5                                                                                                             | SETD5                        | 1,69  | Unknown             |
| 1382117_at   | BF417345  | SET domain containing 6                                                                                                             | SETD6                        | -2,43 | Unknown             |
| 1376486_at   | BG381092  | SH3-domain GRB2-like endophilin B2                                                                                                  | SH3GLB2 (includes EG:311848) | -1,89 | Unknown             |
| 1383587_at   | BF283779  | similar to Butyrate-induced transcript 1                                                                                            | RGD1565496                   | -3,88 | Unknown             |
| 1388763_at   | AI230762  | similar to Calponin-2 (Calponin H2, smooth muscle) (Neutral calponin)                                                               | LOC690976                    | 1,98  | Unknown             |
| 1390435_at   | AA996717  | similar to CG32736-PA                                                                                                               | LOC440957                    | -2,71 | Unknown             |
| 1373514_at   | AA899109  | similar to chromosome 17 open reading frame 27                                                                                      | LOC688296                    | 70,58 | Unknown             |
| 1372563_at   | AA799488  | similar to D330021B20 protein                                                                                                       | RGD1308143                   | -1,73 | Unknown             |
| 1383846_at   | AI576094  | similar to Docking protein 5 (Downstream of tyrosine kinase 5) (Protein dok-5)                                                      | RGD1562846                   | 1,93  | Unknown             |
| 1373506_at   | AA944568  | similar to early estrogen-induced gene 1 protein                                                                                    | LOC687750                    | 1,68  | Unknown             |
| 1391062_at   | AA875129  | similar to elongation protein 4 homolog                                                                                             | LOC687694                    | -2,30 | Unknown             |
| 1373921_at   | AI169007  | similar to enoyl Coenzyme A hydratase domain containing 3                                                                           | LOC684538                    | -3,52 | Unknown             |
| 1389783_s_at | BI280865  | similar to Fc fragment of IgG binding protein; IgG Fc binding protein                                                               | RGD1311906                   | -4,24 | Unknown             |
| 1393841_at   | AA859317  | similar to hypothetical protein FLJ31810                                                                                            | RGD1310773                   | -5,25 | Unknown             |
| 1390226_at   | AI408343  | similar to hypothetical protein LOC340061                                                                                           | RGD1562552                   | 3,05  | Unknown             |
| 1374670_at   | BM384543  | similar to hypothetical protein MGC20700                                                                                            | RGD1307722                   | 3,43  | Unknown             |
| 1382248_at   | BI292769  | similar to leucine rich repeat containing 45                                                                                        | LOC688318                    | -2,18 | Unknown             |
| 1388447_at   | AA800701  | similar to limb-bud and heart                                                                                                       | LOC683626                    | -3,00 | Unknown             |
| 1374522_at   | BG670847  | similar to melanoma inhibitory activity 3                                                                                           | LOC683007                    | -1,83 | Unknown             |
| 1380079_at   | AW533923  | similar to mKIAA2005 protein                                                                                                        | RGD1561472                   | 5,84  | Unknown             |
| 1373330_at   | AI406704  | similar to Myosin-15 (Myosin XV) (Unconventional myosin-15)                                                                         | LOC690323                    | -2,10 | Unknown             |
| 1375523_at   | BE108178  | similar to Myristoylated alanine-rich C-kinase substrate (MARCKS) (ACAMP-81)                                                        | LOC294446                    | -1,77 | Unknown             |
| 1385571_at   | AA923865  | similar to Nuclear autoantigen Sp-100 (Speckled 100 kDa) (Nuclear dot-associated Sp100 protein)                                     | LOC679623                    | 5,70  | Unknown             |
| 1392975_at   | AI058938  | similar to Protease-associated domain-containing protein of 21 kDa precursor                                                        | LOC686393                    | -2,12 | Unknown             |
| 1373403_at   | AI230625  | similar to Protein C8orf4 (Thyroid cancer protein 1) (TC-1)                                                                         | LOC684871                    | 13,42 | Unknown             |
| 1386669_at   | BF565188  | similar to Protein KIAA0690                                                                                                         | LOC679127                    | -2,11 | Unknown             |
| 1373197_at   | AI578263  | similar to Protein KIAA1404                                                                                                         | LOC686701                    | 4,03  | Unknown             |
| 1398625_at   | BG673169  | similar to SMAD-interacting zinc finger protein 2                                                                                   | LOC679126                    | -1,78 | Unknown             |
| 1377156_at   | BI273936  | similar to Transcription factor 7-like 2 (HMG box transcription factor 4) (T-cell-specific transcription factor 4) (TCF-4) (hTCF-4) | LOC683733                    | 12,09 | Unknown             |
| 1384116_at   | AA924216  | similar to vacuolar protein sorting 37D                                                                                             | RCG 21373                    | 10,63 | Unknown             |
| 1372793_at   | BE108903  | single-stranded DNA binding protein 1                                                                                               | SSBP1                        | -2,13 | Cytoplasm           |
| 1377920_at   | AI413026  | small glutamine-rich tetratricopeptide repeat (TPR)-containing, beta                                                                | SGTB                         | 1,53  | Unknown             |
| 1371248_at   | BI286387  | small proline-rich protein 1A                                                                                                       | SPRR1A                       | 11,67 | Cytoplasm           |
| 1380909_at   | BM385894  | solute carrier family 25 (mitochondrial carrier; phosphate carrier), member 24                                                      | SLC25A24                     | 2,09  | Cytoplasm           |
| 1392978_at   | BE117086  | solute carrier family 25, member 28                                                                                                 | SLC25A28                     | 4,19  | Unknown             |
| 1373788_at   | BE097533  | solute carrier family 41, member 1                                                                                                  | SLC41A1 (includes EG:363985) | -1,75 | Unknown             |
| 1367762_at   | NM_012659 | somatostatin                                                                                                                        | SST                          | -2,10 | Extracellular Space |
| 1387018_at   | NM_053770 | sorbin and SH3 domain containing 2                                                                                                  | SORBS2                       | -4,57 | Nucleus             |
| 1372930_at   | AI411381  | SP110 nuclear body protein                                                                                                          | SP110                        | 10,74 | Nucleus             |
| 1394819_at   | AI177957  | SP110 nuclear body protein                                                                                                          | SP110                        | 14,52 | Nucleus             |
| 1372633_at   | AI178531  | spastic paraplegia 20 (Troyer syndrome)                                                                                             | SPG20                        | -2,15 | Cytoplasm           |
| 1398367_at   | BF283504  | speckle-type POZ protein                                                                                                            | SPOP                         | 1,83  | Extracellular Space |
| 1397828_at   | BF387796  | SPHK1 interactor, AKAP domain containing                                                                                            | SPHKAP                       | 1,58  | Unknown             |
| 1398601_at   | AW143872  | spire homolog 1 (Drosophila)                                                                                                        | SPIRE1                       | 2,32  | Cytoplasm           |
| 1370899_at   | AI599699  | splicing factor proline/glutamine-rich (polypyrimidine tract binding protein associated)                                            | SFPQ                         | -2,39 | Nucleus             |
| 1371581_at   | BM388899  | splicing factor, arginine/serine-rich 1                                                                                             | SFRS1                        | -1,63 | Nucleus             |
| 1376160_at   | BF408850  | splicing factor, arginine/serine-rich 16                                                                                            | SFRS16                       | 5,47  | Nucleus             |
| 1398440_at   | BI292166  | splicing factor, arginine/serine-rich 18                                                                                            | SFRS18                       | -2,62 | Nucleus             |
| 1368992_a_at | AI104005  | splicing factor, arginine/serine-rich 5                                                                                             | SFRS5                        | -1,78 | Nucleus             |
| 1389639_at   | BF283302  | Src homology 2 domain containing adaptor protein B                                                                                  | SHB                          | 3,28  | Unknown             |
| 1370680_at   | AF483620  | staufer, RNA binding protein, homolog 2 (Drosophila)                                                                                | STAU2                        | 6,28  | Cytoplasm           |
| 1379754_at   | AI070598  | staufer, RNA binding protein, homolog 2 (Drosophila)                                                                                | STAU2                        | 7,72  | Cytoplasm           |
| 1385397_at   | AA859085  | STEAP family member 4                                                                                                               | STEAP4                       | 17,42 | Plasma Membrane     |
| 1378043_at   | AW532890  | sterile alpha motif domain containing 9                                                                                             | SAMD9                        | 16,69 | Unknown             |

|              |           |                                                                  |                              |        |                     |
|--------------|-----------|------------------------------------------------------------------|------------------------------|--------|---------------------|
| 1376693_at   | AA998964  | sterile alpha motif domain containing 9                          | SAMD9                        | 148,18 | Unknown             |
| 1376024_at   | AW914992  | stromal interaction molecule 1                                   | STIM1                        | -2,13  | Plasma Membrane     |
| 1379279_at   | AI234719  | stromal interaction molecule 2                                   | STIM2                        | 1,81   | Plasma Membrane     |
| 1388658_at   | AA942704  | surfeit 2                                                        | SURF2                        | -2,32  | Unknown             |
| 1389973_a_at | BE112262  | surfeit 4                                                        | SURF4                        | -1,52  | Cytoplasm           |
| 1379635_at   | BF399325  | synapse associated protein 1, SAP47 homolog (Drosophila)         | SYAP1                        | 1,59   | Nucleus             |
| 1367721_at   | NM_012649 | syndecan 4                                                       | SDC4                         | 8,34   | Plasma Membrane     |
| 1373146_at   | AI716240  | synovial sarcoma, X breakpoint 2 interacting protein             | SSX2IP                       | -1,60  | Plasma Membrane     |
| 1371568_at   | AI145381  | synuclein, beta                                                  | SNCB                         | -3,51  | Cytoplasm           |
| 1375074_at   | BE113756  | TBK1 binding protein 1                                           | TBKBP1                       | 2,61   | Unknown             |
| 1392980_at   | AI716456  | T-cell lymphoma invasion and metastasis 1                        | TIAM1                        | 2,69   | Cytoplasm           |
| 1374257_at   | BM389265  | T-cell lymphoma invasion and metastasis 1                        | TIAM1                        | 2,82   | Cytoplasm           |
| 1381167_at   | BF390767  | T-cell lymphoma invasion and metastasis 1                        | TIAM1                        | 3,12   | Cytoplasm           |
| 1372980_at   | AA819250  | tetraspanin 33                                                   | TSPAN33                      | -1,69  | Unknown             |
| 1389139_at   | BG665007  | tetratricopeptide repeat domain 15                               | TTC15                        | -1,92  | Unknown             |
| 1383948_at   | AA998083  | tetratricopeptide repeat domain 28                               | TTC28                        | -3,84  | Unknown             |
| 1383215_at   | BF557467  | tetratricopeptide repeat domain 28                               | TTC28                        | -2,99  | Unknown             |
| 1377860_at   | BM392227  | tetratricopeptide repeat domain 39B                              | TTC39B                       | 5,11   | Unknown             |
| 1378416_at   | AA892565  | tetratricopeptide repeat domain 8                                | TTC8                         | -2,10  | Cytoplasm           |
| 1371131_a_at | U30789    | thioredoxin interacting protein                                  | TXNIP                        | -4,31  | Cytoplasm           |
| 1369946_at   | NM_024384 | THO complex 6 homolog (Drosophila)                               | THOC6                        | 1,87   | Nucleus             |
| 1367655_at   | NM_021261 | thymosin beta 10                                                 | TMSB10                       | 1,92   | Cytoplasm           |
| 1372473_at   | AW434048  | tight junction protein 1 (zona occludens 1)                      | TJP1                         | 2,42   | Plasma Membrane     |
| 1367712_at   | NM_053819 | TIMP metalloproteinase inhibitor 1                               | TIMP1                        | 15,29  | Extracellular Space |
| 1388492_at   | AW919111  | TNFAIP3 interacting protein 1                                    | TNIP1                        | 28,23  | Nucleus             |
| 1383655_at   | BF545192  | TNFAIP3 interacting protein 2                                    | TNIP2                        | 3,22   | Cytoplasm           |
| 1375969_at   | BI296555  | torsin A interacting protein 2                                   | TOR1AIP2                     | 1,93   | Cytoplasm           |
| 1382579_at   | BE107165  | TOX high mobility group box family member 3                      | TOX3                         | 2,73   | Unknown             |
| 1378582_at   | BM383666  | TraB domain containing                                           | TRABD                        | -2,05  | Unknown             |
| 1372252_at   | BE112892  | trafficking protein particle complex 1                           | TRAPPC1                      | -1,93  | Cytoplasm           |
| 1382311_at   | BM384466  | TRAF-interacting protein with forkhead-associated domain         | TIFA                         | 39,75  | Unknown             |
| 1373757_at   | AW529298  | TRAF-type zinc finger domain containing 1                        | TRAFD1                       | 3,13   | Unknown             |
| 1387169_at   | NM_053400 | transducin-like enhancer of split 3 (E(sp1) homolog, Drosophila) | TLE3                         | 3,57   | Nucleus             |
| 1368706_at   | NM_053785 | transmembrane 4 L six family member 4                            | TM4SF4                       | -2,43  | Plasma Membrane     |
| 1374160_at   | BE111296  | transmembrane and coiled-coil domain family 2                    | TMCC2                        | -7,84  | Unknown             |
| 1390832_at   | BI294696  | transmembrane and coiled-coil domain family 3                    | TMCC3                        | 7,91   | Unknown             |
| 1379541_at   | BE329099  | transmembrane and tetratricopeptide repeat containing 4          | TMTC4                        | -3,62  | Unknown             |
| 1376102_at   | BI292351  | transmembrane BAX inhibitor motif containing 1                   | TMBIM1                       | 15,43  | Unknown             |
| 1371968_at   | AI013781  | transmembrane BAX inhibitor motif containing 4                   | TMBIM4                       | 3,28   | Nucleus             |
| 1393845_a_at | AI556940  | transmembrane channel-like 4                                     | TMC4                         | 1,72   | Unknown             |
| 1389467_at   | BM391248  | transmembrane protein 100                                        | TMEM100                      | -3,03  | Unknown             |
| 1374948_at   | BI275815  | transmembrane protein 106A                                       | TMEM106A                     | 8,08   | Unknown             |
| 1388930_at   | AI171651  | transmembrane protein 123                                        | TMEM123                      | -2,10  | Plasma Membrane     |
| 1390042_at   | AI071166  | transmembrane protein 140                                        | TMEM140                      | 24,90  | Unknown             |
| 1376904_at   | AI716115  | transmembrane protein 151A                                       | TMEM151A                     | 19,25  | Unknown             |
| 1382321_at   | AI071312  | transmembrane protein 161A                                       | TMEM161A                     | -2,44  | Unknown             |
| 1372848_at   | BI296915  | transmembrane protein 179                                        | TMEM179                      | -5,22  | Unknown             |
| 1392518_at   | AI577870  | transmembrane protein 184B                                       | TMEM184B                     | 1,88   | Unknown             |
| 1379419_at   | AA962979  | transmembrane protein 184C                                       | TMEM184C                     | -3,75  | Unknown             |
| 1390392_at   | BI301527  | transmembrane protein 185A                                       | TMEM185A                     | -1,73  | Unknown             |
| 1394842_at   | BF289172  | transmembrane protein 19                                         | TMEM19                       | 2,70   | Unknown             |
| 1383118_at   | BI288120  | transmembrane protein 209                                        | TMEM209                      | -3,07  | Unknown             |
| 1382596_a_at | AI230388  | transmembrane protein 214                                        | TMEM214                      | -1,58  | Extracellular Space |
| 1398219_at   | BE109914  | transmembrane protein 215                                        | TMEM215 (includes EG:401498) | -2,27  | Unknown             |
| 1389561_at   | BE110624  | transmembrane protein 218                                        | TMEM218                      | -3,64  | Extracellular Space |
| 1397227_at   | BE120895  | transmembrane protein 35                                         | TMEM35                       | -2,12  | Unknown             |
| 1389171_at   | AI104326  | transmembrane protein 38A                                        | TMEM38A                      | -3,96  | Unknown             |
| 1383369_at   | AI028875  | tripartite motif-containing 26                                   | TRIM26                       | 3,59   | Cytoplasm           |

|                              |           |                                                                       |
|------------------------------|-----------|-----------------------------------------------------------------------|
| 1371786_at                   | BE111791  | tripartite motif-containing 35                                        |
| 1373398_at                   | BI275184  | tripartite motif-containing 37                                        |
| 1372112_at                   | AA945761  | tripartite motif-containing 5                                         |
| 1385252_at                   | BI280655  | tripartite motif-containing 6                                         |
| 1374017_at                   | BI289517  | tripartite motif-containing 72                                        |
| 1368540_at                   | NM_031807 | trophoblast glycoprotein                                              |
| 1395794_at                   | BF395218  | tropomyosin 1 (alpha)                                                 |
| 1370288_a_at                 | AF372216  | tropomyosin 1 (alpha)                                                 |
| 1370287_a_at                 | M23764    | tropomyosin 1 (alpha)                                                 |
| 1383986_at                   | AI071098  | tropomyosin 3                                                         |
| 1388959_at                   | BI297049  | tubulin tyrosine ligase-like family, member 12                        |
| 1373718_at                   | BM384071  | tubulin, beta 2A                                                      |
| 1388131_at                   | X03369    | tubulin, beta 2B                                                      |
| 1372660_at                   | AI180420  | tubulin, gamma complex associated protein 3                           |
| 1371785_at                   | BI303379  | tumor necrosis factor receptor superfamily, member 12A                |
| 1381376_at                   | AI103284  | tumor necrosis factor, alpha-induced protein 2                        |
| 1388773_at                   | BI278479  | tumor necrosis factor, alpha-induced protein 2                        |
| 1368762_at                   | NM_053299 | ubiquitin D                                                           |
| 1371972_at                   | BM388888  | unc-84 homolog B (C. elegans)                                         |
| 1370974_at                   | AJ010392  | vacuolar protein sorting 54 homolog (S. cerevisiae)                   |
| 1389213_at                   | AI408955  | vasohibin 1                                                           |
| 1374589_at                   | AI235367  | vezatin, adherens junctions transmembrane protein                     |
| 1367574_at                   | NM_031140 | vimentin                                                              |
| 1368854_at                   | AI227991  | visinin-like 1                                                        |
| 1391037_at                   | BF412161  | von Willebrand factor A domain containing 5B2                         |
| 1398424_at                   | AA799515  | WD repeat and SOCS box-containing 2                                   |
| 1374793_at                   | BE113663  | WD repeat domain 3                                                    |
| 1390784_at                   | BG662814  | WD repeat domain 37                                                   |
| 1373399_at                   | BI291997  | WD repeat domain 6                                                    |
| 1389644_at                   | BI289857  | WD repeat domain 67                                                   |
| 1376136_at                   | BI296118  | WD repeat domain 90                                                   |
| 1379027_at                   | BM390702  | WW and C2 domain containing 1                                         |
| 1379321_at                   | AI180133  | XK, Kell blood group complex subunit-related family, member 6         |
| 1375058_at                   | BF396164  | zinc finger (CCCH type), RNA-binding motif and serine/arginine rich 2 |
| 1376916_at                   | AW529183  | zinc finger and BTB domain containing 2                               |
| 1375867_at                   | AW524493  | zinc finger and BTB domain containing 4                               |
| 1378049_at                   | AI603565  | zinc finger and SCAN domain containing 20                             |
| 1393140_at                   | AI574699  | zinc finger CCCH-type containing 12A                                  |
| 1387921_at                   | AB032932  | zinc finger CCCH-type containing 14                                   |
| 1374208_at                   | BE116569  | zinc finger CCCH-type containing 7A                                   |
| 1390148_a_at                 | BM388100  | zinc finger protein 395                                               |
| 1380810_at                   | BE102637  | zinc finger protein 40                                                |
| 1389523_at                   | BM386127  | zinc finger protein 598                                               |
| 1368775_at                   | NM_133563 | zinc finger protein 808                                               |
| 1373767_at                   | AI406908  | zinc finger, AN1-type domain 2A                                       |
| 1390607_at                   | BG380706  | zinc finger, DHHC-type containing 23                                  |
| 1367540_at                   | AI044872  | zinc finger, FYVE domain containing 26                                |
| 1373369_at                   | AI406500  | zinc finger, MIZ-type containing 1                                    |
| 1391255_at                   | BE110035  | zinc finger, MYND-type containing 15                                  |
| 1391972_a_at                 | BE108410  | zinc finger, SWIM-type containing 4                                   |
| 1388130_at                   | AA943537  | zyxin                                                                 |
| <b>Not classified by IPA</b> |           |                                                                       |
| 1378759_at                   | BE102644  | 5'-3' exoribonuclease 1 (predicted)                                   |
| 1391548_at                   | AA955786  | A kinase (PRKA) anchor protein 5                                      |
| 1396539_at                   | BE119221  | actinin, alpha 1                                                      |
| 1374432_at                   | BE118251  | activated leukocyte cell adhesion molecule                            |
| 1382294_at                   | AI576111  | activated leukocyte cell adhesion molecule                            |
| 1390465_at                   | AW534554  | amphoterin induced gene and ORF 3                                     |

|                           |        |                     |
|---------------------------|--------|---------------------|
| TRIM35                    | -2,13  | Cytoplasm           |
| TRIM37                    | -2,04  | Cytoplasm           |
| TRIM5                     | 4,98   | Cytoplasm           |
| TRIM6                     | 13,79  | Unknown             |
| TRIM72                    | 3,06   | Unknown             |
| TPBG                      | 14,73  | Plasma Membrane     |
| TPM1                      | 2,04   | Cytoplasm           |
| TPM1                      | 2,15   | Cytoplasm           |
| TPM1                      | 2,32   | Cytoplasm           |
| TPM3                      | 1,55   | Cytoplasm           |
| TTL12                     | -1,79  | Unknown             |
| TUBB2A                    | 3,38   | Cytoplasm           |
| TUBB2B                    | 6,68   | Cytoplasm           |
| TUBGCP3                   | 1,78   | Cytoplasm           |
| TNFRSF12A                 | 4,30   | Plasma Membrane     |
| TNFAIP2                   | 6,88   | Extracellular Space |
| TNFAIP2                   | 201,55 | Extracellular Space |
| UBD                       | 285,96 | Nucleus             |
| UNC84B                    | 3,29   | Nucleus             |
| VPS54                     | 2,35   | Unknown             |
| VASH1                     | 2,08   | Extracellular Space |
| VEZT                      | 2,26   | Plasma Membrane     |
| VIM                       | 3,78   | Cytoplasm           |
| VSNL1                     | -10,16 | Cytoplasm           |
| VWA5B2                    | -2,51  | Unknown             |
| WSB2                      | -3,08  | Unknown             |
| WDR3                      | -2,57  | Cytoplasm           |
| WDR37                     | -2,38  | Unknown             |
| WDR6 (includes EG:301007) | -2,59  | Unknown             |
| WDR67                     | -3,03  | Unknown             |
| WDR90                     | -2,57  | Unknown             |
| WWC1                      | 2,35   | Cytoplasm           |
| XKR6                      | -1,61  | Unknown             |
| ZRSR2                     | -2,12  | Nucleus             |
| ZBTB2                     | 4,45   | Nucleus             |
| ZBTB4                     | -1,55  | Nucleus             |
| ZSCAN20                   | -3,26  | Nucleus             |
| ZC3H12A                   | 47,38  | Unknown             |
| ZC3H14                    | 1,61   | Nucleus             |
| ZC3H7A                    | 2,03   | Unknown             |
| ZNF395                    | -6,34  | Cytoplasm           |
| ZFP40                     | -2,51  | Unknown             |
| ZNF598                    | 2,44   | Unknown             |
| ZNF808                    | -3,13  | Unknown             |
| ZFAND2A                   | 1,79   | Unknown             |
| ZDHHC23                   | -1,59  | Unknown             |
| ZFYVE26                   | 5,41   | Unknown             |
| ZMIZ1                     | 2,00   | Nucleus             |
| ZMYND15                   | 25,49  | Unknown             |
| ZSWIM4                    | 11,99  | Unknown             |
| ZYX                       | 5,32   | Plasma Membrane     |
| Xrn1_predicted            | 2,01   |                     |
| Akap5                     | 2,09   |                     |
| Actn1                     | 1,59   |                     |
| Alcam                     | 1,57   |                     |
| Alcam                     | 3,02   |                     |
| Amigo3                    | -1,52  |                     |

|              |          |                                                                                |
|--------------|----------|--------------------------------------------------------------------------------|
| 1380858_at   | BE120316 | AT hook, DNA binding motif, containing 1 (predicted)                           |
| 1377195_at   | BF406252 | ATPase, Na <sup>+</sup> /K <sup>+</sup> transporting, beta 3 polypeptide       |
| 1370583_s_at | AY082609 | ATP-binding cassette, sub-family B (MDR/TAP), member 1                         |
| 1381121_at   | AW533010 | basic helix-loop-helix domain containing, class B2                             |
| 1392397_at   | BF389365 | BMP-2 inducible kinase                                                         |
| 1377345_at   | AI502211 | bobby sox homolog (Drosophila) (predicted)                                     |
| 1379663_at   | AI010254 | cache domain containing 1 (predicted)                                          |
| 1393066_at   | AI070787 | cadherin 1                                                                     |
| 1375636_at   | AI600042 | casein kinase II, alpha 1 polypeptide                                          |
| 1392184_at   | BI298049 | CASP8 and FADD-like apoptosis regulator                                        |
| 1392386_at   | AI578435 | CASP8 and FADD-like apoptosis regulator                                        |
| 1381173_at   | BG375010 | caspase 4, apoptosis-related cysteine peptidase                                |
| 1377236_at   | BF405622 | cell division cycle 2-like 5 (cholinesterase-related cell division controller) |
| 1396754_at   | BF403379 | coatamer protein complex, subunit zeta 1 (predicted)                           |
| 1374731_at   | BI275929 | coilin                                                                         |
| 1374273_at   | BG665433 | coxsackie virus and adenovirus receptor                                        |
| 1384718_at   | AI030198 | craniofacial development protein 1                                             |
| 1385334_at   | AA818166 | cytochrome P450-like protein                                                   |
| 1391259_at   | BE104618 | dehydrogenase/reductase (SDR family) member 1                                  |
| 1388479_at   | BI294841 | dihydropyrimidinase-like 3                                                     |
| 1375866_at   | BF396191 | dynein-like protein 2                                                          |
| 1398000_at   | BF394082 | dystonin (predicted)                                                           |
| 1393735_at   | AI712582 | glutamine and serine rich 1 (predicted)                                        |
| 1378543_at   | BE108222 | heterogeneous nuclear ribonucleoprotein A2/B1 (predicted)                      |
| 1375927_at   | BE100774 | hypothetical protein LOC499120                                                 |
| 1376618_at   | AI236218 | hypothetical protein LOC691931                                                 |
| 1383476_at   | AW528065 | inter-alpha trypsin inhibitor, heavy chain 3                                   |
| 1390070_at   | BI296990 | karyopherin (importin) alpha 2                                                 |
| 1374065_at   | BG378920 | met proto-oncogene                                                             |
| 1396292_at   | BG379069 | N-glycanase 1 (predicted)                                                      |
| 1397114_at   | BF388191 | nuclear fragile X mental retardation protein interacting protein 1             |
| 1397004_at   | BF394158 | nuclear receptor subfamily 3, group C, member 1                                |
| 1395613_at   | BF408015 | par-3 (partitioning defective 3) homolog (C. elegans)                          |
| 1391295_at   | AI136393 | phosphodiesterase 10A                                                          |
| 1390181_at   | BE115041 | phytanoyl-CoA dioxygenase domain containing 1                                  |
| 1380570_at   | AI145593 | piccolo (presynaptic cytomatrix protein)                                       |
| 1378038_at   | BF393884 | polypyrimidine tract binding protein 2                                         |
| 1378665_at   | BF415436 | protocadherin 9 (predicted)                                                    |
| 1389022_at   | AI102760 | putative aminopeptidase Fxna                                                   |
| 1399140_at   | AA965202 | Rap guanine nucleotide exchange factor (GEF) 1                                 |
| 1383894_at   | BI289486 | Rap guanine nucleotide exchange factor (GEF) 6 (predicted)                     |
| 1382090_at   | AI070376 | regulator of G-protein signaling 9                                             |
| 1393263_at   | AW522530 | RGD1563912 (predicted)                                                         |
| 1382389_at   | AI179755 | Rho guanine nucleotide exchange factor (GEF) 5                                 |
| 1374844_at   | BF284573 | RNA binding motif protein 14                                                   |
| 1396310_at   | BF545380 | RNA binding motif protein 9 (predicted)                                        |
| 1377036_at   | BE102350 | RT1 class Ib, locus Aw2                                                        |
| 1396304_at   | BI292055 | RT1 class Ib, locus Aw2                                                        |
| 1379357_at   | AI408767 | RT1 class Ib, locus Aw2                                                        |
| 1379496_at   | AI029460 | RT1 class Ib, locus Aw2                                                        |
| 1380415_at   | AI233027 | RT1 class Ib, locus Aw2                                                        |
| 1390562_s_at | BE102350 | RT1 class Ib, locus Aw2                                                        |
| 1392954_at   | AI029637 | RT1 class Ib, locus Aw2                                                        |
| 1393108_at   | BM387813 | RT1 class Ib, locus Aw2                                                        |
| 1380129_at   | AA818937 | RT1 class Ib, locus Aw2                                                        |
| 1379818_at   | BF288109 | RT1 class Ib, locus Aw2                                                        |
| 1375374_at   | BF400606 | sequestosome 1                                                                 |
| 1392017_at   | BF397766 | signal transducing adaptor molecule (SH3 domain and ITAM motif) 2              |

|                      |       |
|----------------------|-------|
| Ahdcl_predicted      | -2,37 |
| Atp1b3               | -1,88 |
| Abcb1                | 10,50 |
| Bhlhb2               | 2,53  |
| Bmp2k                | -3,09 |
| Bbx_predicted        | 1,84  |
| Cachd1_predicted     | 2,50  |
| Cdh1                 | -3,61 |
| Csnk2a1              | -1,76 |
| Cflar                | 2,20  |
| Cflar                | 2,27  |
| Casp4                | 17,97 |
| Cdc2l5               | 1,68  |
| Copz1_predicted      | 1,53  |
| Coil                 | 3,70  |
| Cxadr                | -2,12 |
| Cfdp1                | 1,72  |
| LOC266761            | -1,54 |
| Dhrs1                | -2,94 |
| Dpysl3               | 4,09  |
| DLP2                 | 3,30  |
| Dst_predicted        | 1,92  |
| Qser1_predicted      | 1,72  |
| Hnrpa2b1_predicted   | -1,74 |
| LOC499120            | -2,20 |
| LOC691931            | 1,55  |
| Itih3                | 5,97  |
| Kpna2                | -2,03 |
| Met                  | 4,28  |
| Ngly1_predicted      | -2,27 |
| Nufip1               | 1,86  |
| Nr3c1                | 2,56  |
| Pard3                | 2,50  |
| Pde10a               | -4,21 |
| Phyhd1               | -2,35 |
| Pclo                 | -3,51 |
| Ptbp2                | 1,58  |
| Pcdh9_predicted      | -4,24 |
| Fxna                 | 2,67  |
| Rapgef1              | 1,58  |
| Rapgef6_predicted    | 5,54  |
| Rgs9                 | 2,48  |
| RGD1563912_predicted | -2,15 |
| Arhgef5              | 3,52  |
| Rbm14                | -2,43 |
| Rbm9_predicted       | 1,72  |
| RT1-Aw2              | 3,09  |
| RT1-Aw2              | 4,65  |
| RT1-Aw2              | 5,61  |
| RT1-Aw2              | 6,45  |
| RT1-Aw2              | 6,50  |
| RT1-Aw2              | 6,53  |
| RT1-Aw2              | 7,21  |
| RT1-Aw2              | 7,38  |
| RT1-Aw2              | 8,76  |
| RT1-Aw2              | 35,19 |
| Sqstm1               | 2,40  |
| Stam2                | 2,32  |

|            |          |                                                                                                                         |
|------------|----------|-------------------------------------------------------------------------------------------------------------------------|
| 1385218_at | AI044551 | similar to AD24 (predicted)                                                                                             |
| 1389918_at | BM391364 | similar to AL023001 protein (predicted)                                                                                 |
| 1378867_at | BG374639 | similar to CG32425-PA (predicted)                                                                                       |
| 1380042_at | AA964012 | similar to D3Mm3e (predicted)                                                                                           |
| 1375672_at | BG380279 | similar to expressed sequence AA408877                                                                                  |
| 1374766_at | BE103616 | similar to F33H2.2                                                                                                      |
| 1385926_at | BF550565 | similar to GLI pathogenesis-related 2                                                                                   |
| 1398206_at | BE109223 | similar to GrpE protein homolog 2, mitochondrial precursor (Mt-GrpE#2)                                                  |
| 1392148_at | BF391605 | similar to H43E16.1                                                                                                     |
| 1376990_at | BE118704 | similar to HCDI protein (predicted)                                                                                     |
| 1392109_at | BG671422 | similar to hypothetical protein FLJ21439 (predicted)                                                                    |
| 1389261_at | BI290739 | similar to hypothetical protein MGC23280 (predicted)                                                                    |
| 1392637_at | AA923988 | similar to interferon-inducible GTPase                                                                                  |
| 1394405_at | AI232356 | similar to KIAA0303 (predicted)                                                                                         |
| 1379114_at | BF412325 | similar to KIAA0303 (predicted)                                                                                         |
| 1378783_at | AI144739 | similar to KIAA0303 (predicted)                                                                                         |
| 1383173_at | BI281630 | similar to Microtubule-associated protein RP/EB family member 2 (APC-binding protein EB2) (End-binding protein 2) (EB2) |
| 1398393_at | BF414412 | similar to mitogen-activated protein kinase 11                                                                          |
| 1390804_at | AI176434 | similar to mKIAA0518 protein (predicted)                                                                                |
| 1390987_at | AI406858 | similar to novel protein (predicted)                                                                                    |
| 1397676_at | BF290784 | similar to osteoclast inhibitory lectin (predicted)                                                                     |
| 1378094_at | BM389654 | similar to pleckstrin homology-like domain, family B, member 2                                                          |
| 1379477_at | AI555261 | similar to Programmed cell death 6 interacting protein (ALG-2 interacting protein X) (predicted)                        |
| 1389500_at | BM383122 | similar to ras homolog gene family, member U                                                                            |
| 1379347_at | BM389290 | similar to RIKEN cDNA 1700023M03                                                                                        |
| 1374811_at | AA858705 | similar to RIKEN cDNA 1810033M07 (predicted)                                                                            |
| 1393369_at | BI300502 | similar to RIKEN cDNA 4921511I16                                                                                        |
| 1383204_at | BE099804 | similar to RIKEN cDNA A530089I17 (predicted)                                                                            |
| 1372826_at | BI285718 | similar to RIKEN cDNA A530089I17 (predicted)                                                                            |
| 1375678_at | AI412430 | similar to RIKEN cDNA D030012E24 gene (predicted)                                                                       |
| 1392647_at | BF282318 | similar to Serum amyloid A-3 protein precursor                                                                          |
| 1376920_at | BF408536 | similar to sterile alpha motif domain containing 9-like                                                                 |
| 1380925_at | BF420093 | similar to talin 2 (predicted)                                                                                          |
| 1393561_at | BF396511 | similar to vacuolar protein sorting 13C protein (predicted)                                                             |
| 1377273_at | BF389637 | similar to Wolf-Hirschhorn syndrome candidate 1 protein isoform 1                                                       |
| 1379873_at | BI276971 | similar to zinc finger protein 59                                                                                       |
| 1389744_at | AW527194 | sodium channel, voltage-gated, type XI, alpha                                                                           |
| 1395039_at | BI289224 | solute carrier organic anion transporter family, member 3a1                                                             |
| 1383871_at | BE120348 | syntaxin binding protein 2                                                                                              |
| 1376673_at | BM391853 | transcription factor 8                                                                                                  |
| 1378081_at | BI285065 | transforming growth factor beta 1 induced transcript 4                                                                  |
| 1372104_at | BF289002 | transmembrane BAX inhibitor motif containing 1                                                                          |
| 1375814_at | BG380887 | unc-84 homolog A (C. elegans)                                                                                           |
| 1385217_at | BM385870 | zinc finger and BTB domain containing 10                                                                                |
| 1378302_at | BF403965 | zinc finger, CSL-type containing 3 (predicted)                                                                          |
| 1393000_at | AI045970 | zinc finger, DHHC domain containing 6                                                                                   |

**Not classified**

|              |          |  |
|--------------|----------|--|
| 1382950_at   | AA901350 |  |
| 1373740_at   | AA851385 |  |
| 1372318_at   | AI235528 |  |
| 1383649_a_at | BI291080 |  |
| 1390324_at   | BE101809 |  |
| 1377424_at   | AI712672 |  |
| 1393528_at   | AI059227 |  |
| 1378496_at   | BM384963 |  |
| 1398412_at   | BF402250 |  |
| 1376398_at   | BF417784 |  |
| 1384460_at   | AI072669 |  |

|                      |       |
|----------------------|-------|
| RGD1560656_predicted | 2,77  |
| RGD1305001_predicted | 4,32  |
| RGD1307366_predicted | 12,08 |
| RGD1561494_predicted | -3,15 |
| RGD1308513           | -3,08 |
| LOC689997            | -2,27 |
| LOC679819            | 14,36 |
| LOC688777            | 2,21  |
| LOC689994            | -5,53 |
| RGD1309307_predicted | 2,56  |
| RGD1562529_predicted | -1,63 |
| RGD1305508_predicted | 3,25  |
| MGC108823            | 33,35 |
| RGD1310139_predicted | 2,52  |
| RGD1310139_predicted | 3,58  |
| RGD1310139_predicted | 11,30 |
| LOC679221            | -2,56 |
| LOC689314            | 4,59  |
| RGD1561597_predicted | 1,72  |
| RGD1565283_predicted | 5,36  |
| RGD1563148_predicted | 2,84  |
| LOC685611            | -2,53 |
| RGD1561176_predicted | 4,21  |
| LOC678766            | 4,41  |
| RGD1305457           | -2,61 |
| RGD1565381_predicted | -2,20 |
| RGD1305302           | 1,86  |
| RGD1311375_predicted | 4,60  |
| RGD1311375_predicted | 6,84  |
| RGD1311298_predicted | 2,92  |
| LOC691143            | 4,90  |
| LOC500013            | 58,33 |
| RGD1565416_predicted | 1,81  |
| RGD1560364_predicted | 1,77  |
| LOC680537            | -2,96 |
| LOC685610            | -1,57 |
| Scn11a               | -2,00 |
| Slco3a1              | 1,91  |
| Stxbp2               | -1,77 |
| Tcf8                 | 4,41  |
| Tgfb14               | -3,58 |
| Tmbim1               | -2,52 |
| Unc84a               | 2,41  |
| Zbtb10               | 2,79  |
| Zcs13_predicted      | 8,08  |
| Zdhc6                | -3,98 |

|        |
|--------|
| 355,19 |
| -14,32 |
| -13,02 |
| -11,75 |
| -10,85 |
| -9,20  |
| -9,02  |
| -8,25  |
| -7,96  |
| -7,64  |
| -7,11  |

|            |          |       |
|------------|----------|-------|
| 1398497_at | BF391243 | -6,01 |
| 1377442_at | BF409997 | -5,92 |
| 1372381_at | BM383457 | -5,13 |
| 1389706_at | AI007639 | -4,98 |
| 1379400_at | AI044556 | -4,83 |
| 1386114_at | BF550033 | -4,62 |
| 1379373_at | AI556457 | -4,61 |
| 1383650_at | BI291080 | -4,57 |
| 1383967_at | BI275739 | -4,53 |
| 1385381_at | AA996491 | -4,50 |
| 1381043_at | AI639256 | -4,48 |
| 1385138_at | BF401469 | -4,33 |
| 1383254_at | BF403169 | -4,32 |
| 1379647_at | BI295140 | -4,30 |
| 1392125_at | BF390331 | -4,15 |
| 1398707_at | BE108582 | -4,07 |
| 1389687_at | BI273981 | -4,00 |
| 1384922_at | AW527642 | -3,93 |
| 1389584_at | AI101266 | -3,83 |
| 1382438_at | BF393639 | -3,78 |
| 1392869_at | AI111868 | -3,77 |
| 1393273_at | AW533027 | -3,72 |
| 1372831_at | BE349838 | -3,71 |
| 1384096_at | BI279347 | -3,68 |
| 1392982_at | AA818059 | -3,65 |
| 1389412_at | AA800693 | -3,55 |
| 1373519_at | AI412601 | -3,54 |
| 1379607_at | AW527767 | -3,54 |
| 1396621_at | BF408910 | -3,41 |
| 1390543_at | BF396416 | -3,33 |
| 1380712_at | AI406475 | -3,26 |
| 1389650_at | BI295153 | -3,21 |
| 1376966_at | BE108930 | -3,21 |
| 1381459_at | BE099644 | -3,20 |
| 1374542_at | AI409904 | -3,18 |
| 1378672_at | BG381207 | -3,17 |
| 1373055_at | AI407547 | -3,11 |
| 1374060_at | AI411374 | -3,04 |
| 1394475_at | BE096857 | -3,01 |
| 1391672_at | BF399539 | -2,96 |
| 1391305_at | AI576233 | -2,90 |
| 1378603_at | BM387125 | -2,84 |
| 1378457_at | AI179450 | -2,83 |
| 1379597_at | AI011037 | -2,79 |
| 1383511_at | BF409024 | -2,77 |
| 1384470_at | BE114218 | -2,76 |
| 1376637_at | AI102401 | -2,76 |
| 1385577_at | AW531898 | -2,76 |
| 1392716_at | BF282115 | -2,72 |
| 1389206_at | BE116867 | -2,72 |
| 1376395_at | AI145359 | -2,71 |
| 1397928_at | BF389357 | -2,66 |
| 1390393_at | BF388422 | -2,61 |
| 1390203_at | AI411149 | -2,58 |
| 1373269_at | AI407751 | -2,50 |
| 1384699_at | BM384930 | -2,47 |
| 1378070_at | BE099891 | -2,45 |
| 1372515_at | BI281177 | -2,45 |



|              |          |       |
|--------------|----------|-------|
| 1372911_at   | BI281950 | -2,45 |
| 1391825_at   | BE120422 | -2,45 |
| 1390457_at   | BM385762 | -2,45 |
| 1392026_at   | BF391823 | -2,44 |
| 1391459_at   | BI296636 | -2,42 |
| 1373638_at   | BG380827 | -2,40 |
| 1389511_s_at | BF403383 | -2,40 |
| 1377456_at   | BE116775 | -2,39 |
| 1397871_at   | AI144643 | -2,37 |
| 1396119_at   | AW534209 | -2,37 |
| 1389774_at   | AI008371 | -2,37 |
| 1388561_at   | AI412886 | -2,34 |
| 1392969_at   | BI282309 | -2,32 |
| 1383642_at   | BG374114 | -2,30 |
| 1398531_at   | AI058947 | -2,29 |
| 1389395_at   | BI275654 | -2,27 |
| 1383675_at   | BG371620 | -2,26 |
| 1395536_at   | BG673248 | -2,23 |
| 1379719_at   | AI408386 | -2,22 |
| 1395705_at   | BF412848 | -2,20 |
| 1378861_at   | BE105498 | -2,20 |
| 1396328_at   | BF390586 | -2,17 |
| 1386140_at   | AI235950 | -2,16 |
| 1391251_at   | BI290666 | -2,16 |
| 1379283_at   | BE117687 | -2,14 |
| 1378860_at   | AW525986 | -2,14 |
| 1395544_at   | BG666601 | -2,13 |
| 1373053_at   | AI169620 | -2,13 |
| 1393478_at   | AI029492 | -2,11 |
| 1374615_at   | AI175668 | -2,10 |
| 1378391_at   | AI511069 | -2,10 |
| 1377045_at   | BG372832 | -2,07 |
| 1377856_at   | BE113045 | -2,05 |
| 1374896_at   | AI101385 | -2,02 |
| 1394576_at   | AA900572 | -2,00 |
| 1379267_a_at | AA924312 | -1,98 |
| 1389589_at   | BE105898 | -1,96 |
| 1380137_at   | BF406176 | -1,95 |
| 1391802_at   | BE107950 | -1,95 |
| 1382362_at   | AA997890 | -1,95 |
| 1394456_at   | AW525722 | -1,94 |
| 1392131_at   | AI012870 | -1,94 |
| 1391670_at   | BI295819 | -1,94 |
| 1381400_at   | AI137973 | -1,94 |
| 1394553_at   | AI007661 | -1,93 |
| 1393699_at   | BF391905 | -1,91 |
| 1396441_at   | BE108895 | -1,91 |
| 1391979_at   | AA851345 | -1,91 |
| 1376590_at   | AA818732 | -1,91 |
| 1383150_at   | BE114751 | -1,88 |
| 1389794_at   | AI044984 | -1,88 |
| 1383929_at   | AI230265 | -1,88 |
| 1374685_at   | BE117446 | -1,85 |
| 1395233_at   | BE107671 | -1,85 |
| 1374809_at   | BG672598 | -1,84 |
| 1398368_at   | AI406502 | -1,82 |
| 1376108_at   | AI030915 | -1,82 |
| 1382886_at   | BE100329 | -1,81 |

|              |          |       |
|--------------|----------|-------|
| 1397765_at   | BF406754 | -1,81 |
| 1383194_a_at | AI030349 | -1,79 |
| 1382497_at   | AA875457 | -1,79 |
| 1381084_at   | AA964619 | -1,78 |
| 1374509_at   | BI275722 | -1,76 |
| 1382705_at   | BE116909 | -1,73 |
| 1390145_at   | AW524532 | -1,71 |
| 1391445_at   | AI009603 | -1,70 |
| 1396252_at   | BE117174 | -1,69 |
| 1389602_at   | BF396759 | -1,68 |
| 1379431_at   | AW918368 | -1,66 |
| 1394620_at   | BI288579 | -1,63 |
| 1383503_at   | AI102821 | -1,62 |
| 1374243_at   | AI102744 | -1,61 |
| 1380449_at   | AI112513 | -1,61 |
| 1373736_at   | AI178446 | -1,60 |
| 1390444_at   | AI044433 | -1,59 |
| 1379410_at   | AA925019 | -1,57 |
| 1372258_at   | AI102935 | -1,57 |
| 1372642_at   | BE113397 | -1,56 |
| 1397888_at   | BM389787 | -1,56 |
| 1397572_at   | BE109994 | -1,56 |
| 1375723_at   | AI385171 | -1,53 |
| 1398978_at   | AA850525 | -1,53 |
| 1383660_at   | AI713166 | -1,52 |
| 1391822_at   | AW253356 | -1,52 |
| 1386022_at   | AW921706 | -1,51 |
| 1383458_at   | BF403759 | -1,50 |
| 1388781_at   | AW434329 | 1,50  |
| 1376520_at   | BE117616 | 1,52  |
| 1375899_at   | BF283736 | 1,52  |
| 1384041_at   | BG671630 | 1,54  |
| 1374531_at   | AA926305 | 1,54  |
| 1377322_at   | BE117290 | 1,55  |
| 1384019_a_at | BM383449 | 1,59  |
| 1390685_at   | BF395810 | 1,60  |
| 1377999_at   | BE103242 | 1,63  |
| 1389640_at   | BM391811 | 1,64  |
| 1381237_at   | AW534521 | 1,67  |
| 1392761_at   | BM389886 | 1,68  |
| 1376996_at   | AI556018 | 1,70  |
| 1383910_at   | BF398220 | 1,71  |
| 1378112_at   | BI304019 | 1,73  |
| 1372796_at   | AA894188 | 1,74  |
| 1382094_at   | BI285519 | 1,76  |
| 1378668_at   | BG672426 | 1,76  |
| 1378373_at   | BF522207 | 1,79  |
| 1382381_at   | AA818480 | 1,81  |
| 1393052_at   | BM392406 | 1,82  |
| 1383114_at   | BI296782 | 1,83  |
| 1375191_at   | AI230379 | 1,83  |
| 1379316_at   | BG373832 | 1,85  |
| 1372347_at   | BI289462 | 1,85  |
| 1377996_at   | BE103975 | 1,85  |
| 1379546_at   | AA875623 | 1,88  |
| 1391828_at   | AI030836 | 1,89  |
| 1379982_at   | BE117278 | 1,91  |
| 1385648_at   | AA956840 | 1,92  |

|              |          |      |
|--------------|----------|------|
| 1372937_at   | AI012601 | 1,92 |
| 1384163_at   | BE103875 | 1,92 |
| 1371575_at   | BF281185 | 1,93 |
| 1390856_at   | BF289100 | 1,96 |
| 1378292_at   | BE096367 | 1,98 |
| 1386195_x_at | AI176775 | 1,98 |
| 1371699_at   | BI295739 | 1,99 |
| 1379382_at   | AI144865 | 2,02 |
| 1380186_at   | AI101272 | 2,02 |
| 1398319_at   | AI071000 | 2,04 |
| 1388509_at   | BI274303 | 2,07 |
| 1390698_at   | BF395822 | 2,07 |
| 1399121_at   | BE111600 | 2,09 |
| 1379232_at   | AA955771 | 2,11 |
| 1375962_at   | BE102925 | 2,11 |
| 1381275_at   | AI179171 | 2,13 |
| 1375006_at   | BE121050 | 2,14 |
| 1390122_at   | BI275740 | 2,15 |
| 1383527_at   | BF418522 | 2,16 |
| 1390400_a_at | BM390922 | 2,17 |
| 1377925_at   | BE105762 | 2,18 |
| 1384892_at   | AI029798 | 2,18 |
| 1390204_at   | AI227856 | 2,19 |
| 1379487_at   | BF287099 | 2,20 |
| 1380400_at   | BF402498 | 2,20 |
| 1376869_at   | BE108193 | 2,21 |
| 1376205_at   | BI286851 | 2,21 |
| 1385379_at   | AA998187 | 2,21 |
| 1394797_at   | BI276075 | 2,22 |
| 1371821_at   | BM391330 | 2,22 |
| 1372178_at   | BM385981 | 2,23 |
| 1382610_at   | AA957105 | 2,23 |
| 1384232_at   | AI709768 | 2,23 |
| 1385033_at   | AI548918 | 2,24 |
| 1378578_at   | BE117291 | 2,25 |
| 1396307_at   | BF522907 | 2,25 |
| 1374736_at   | AI172004 | 2,31 |
| 1397558_at   | AW527159 | 2,31 |
| 1377411_at   | BF404135 | 2,33 |
| 1391031_at   | BF389889 | 2,33 |
| 1381081_at   | AW523873 | 2,33 |
| 1379092_at   | AI712997 | 2,34 |
| 1377879_at   | BE102375 | 2,34 |
| 1380297_at   | AW915533 | 2,36 |
| 1389465_at   | AI231286 | 2,36 |
| 1373082_at   | AA893743 | 2,37 |
| 1390841_at   | BI290420 | 2,38 |
| 1392683_at   | AW142773 | 2,39 |
| 1389287_at   | BI279573 | 2,48 |
| 1384110_at   | AI045668 | 2,48 |
| 1373679_at   | AA946467 | 2,48 |
| 1391574_at   | AW253369 | 2,51 |
| 1374433_at   | BI301532 | 2,58 |
| 1383999_at   | AW527651 | 2,61 |
| 1377380_at   | AI060045 | 2,61 |
| 1395744_at   | BF291140 | 2,63 |
| 1386252_at   | BE349825 | 2,64 |
| 1378421_at   | BG671734 | 2,65 |

|            |          |      |
|------------|----------|------|
| 1376848_at | AI137988 | 2,67 |
| 1389586_at | BE107169 | 2,68 |
| 1383348_at | BF545309 | 2,72 |
| 1376672_at | AW533083 | 2,72 |
| 1397904_at | BI292042 | 2,73 |
| 1377180_at | BF394102 | 2,77 |
| 1381579_at | BF386959 | 2,88 |
| 1379310_at | AI101880 | 2,90 |
| 1382931_at | AA924607 | 2,90 |
| 1381534_at | BI278449 | 2,92 |
| 1392876_at | BG375098 | 2,94 |
| 1383486_at | AA926109 | 2,97 |
| 1373164_at | AI012590 | 3,01 |
| 1374578_at | AI409501 | 3,03 |
| 1391125_at | AI639331 | 3,05 |
| 1394399_at | AW523958 | 3,12 |
| 1377117_at | BF387780 | 3,16 |
| 1390708_at | AI012518 | 3,17 |
| 1389150_at | AW524559 | 3,26 |
| 1373678_at | BE098848 | 3,29 |
| 1390809_at | AI599392 | 3,29 |
| 1389613_at | AI234712 | 3,30 |
| 1390134_at | AI411274 | 3,33 |
| 1372719_at | BF283702 | 3,40 |
| 1396770_at | BE099410 | 3,43 |
| 1379089_at | BM382838 | 3,49 |
| 1391269_at | BG372987 | 3,59 |
| 1391808_at | AI535140 | 3,74 |
| 1388759_at | BM389875 | 3,83 |
| 1376700_at | AI179472 | 3,92 |
| 1372466_at | AI408571 | 3,94 |
| 1382736_at | AI407047 | 4,01 |
| 1381145_at | BE112469 | 4,08 |
| 1373488_at | BF289154 | 4,09 |
| 1395557_at | BF565718 | 4,43 |
| 1383770_at | BE117323 | 4,44 |
| 1379788_at | AI231019 | 4,46 |
| 1390391_at | BF283381 | 4,47 |
| 1382777_at | BE108796 | 4,49 |
| 1374137_at | AA818055 | 4,71 |
| 1384242_at | BI303239 | 4,78 |
| 1389718_at | AA956417 | 4,92 |
| 1376006_at | BG373799 | 4,94 |
| 1380200_at | AI102906 | 4,97 |
| 1384184_at | BE117485 | 5,06 |
| 1388915_at | BI295753 | 5,13 |
| 1380119_at | AA996432 | 5,33 |
| 1391958_at | BE119699 | 5,50 |
| 1383285_at | BG671375 | 5,58 |
| 1391497_at | AA997515 | 5,65 |
| 1386566_at | BF558962 | 6,04 |
| 1390364_at | AI044316 | 6,07 |
| 1377994_at | AI501237 | 6,14 |
| 1386695_at | BF565756 | 6,29 |
| 1382884_at | AI009813 | 6,74 |
| 1374429_at | AI598401 | 7,48 |
| 1382278_at | BI278180 | 7,56 |
| 1381228_at | AI073001 | 8,03 |

|              |          |  |        |
|--------------|----------|--|--------|
| 1392655_at   | AA997266 |  | 8,45   |
| 1379696_at   | BI291833 |  | 8,57   |
| 1379371_at   | BF284791 |  | 9,10   |
| 1388986_at   | AI598339 |  | 9,36   |
| 1396755_at   | BF399394 |  | 9,70   |
| 1374627_at   | BF283727 |  | 10,63  |
| 1393494_at   | AA866419 |  | 10,65  |
| 1382933_at   | BE102157 |  | 10,84  |
| 1374622_at   | BE107309 |  | 11,96  |
| 1392600_a_at | AI176989 |  | 13,17  |
| 1392012_at   | BE100353 |  | 13,31  |
| 1383189_at   | AA818143 |  | 13,90  |
| 1375979_at   | AA945734 |  | 14,52  |
| 1373843_at   | BE107419 |  | 14,55  |
| 1392777_at   | BF287676 |  | 14,63  |
| 1383939_at   | BG378849 |  | 15,31  |
| 1393469_at   | BE102340 |  | 16,15  |
| 1390659_at   | BI302830 |  | 16,86  |
| 1377826_at   | AI176721 |  | 17,84  |
| 1372479_at   | AI175666 |  | 22,00  |
| 1385925_at   | AA963975 |  | 22,34  |
| 1393957_at   | AI548358 |  | 34,09  |
| 1374337_at   | AI408954 |  | 43,54  |
| 1383757_at   | AI044802 |  | 53,43  |
| 1385641_at   | AI070558 |  | 55,44  |
| 1391106_at   | BM385061 |  | 57,04  |
| 1393728_at   | AA964541 |  | 71,44  |
| 1397611_at   | AW525619 |  | 111,13 |
| 1385380_at   | AI044983 |  | 126,47 |

Primary rat  $\beta$ -cells were left untreated or exposed to IL1 $\beta$ +IFN- $\gamma$  (IL+IFN) for 6h. Data are mean of three independent experiments and are expressed as fold change versus control cells, studied at the same time point

Gene expression was considered modified by treatment when  $P \leq 0.02$  (paired *t-test*) and expression level  $\geq 1.5$  fold higher or lower as compared to control conditions.

Pval = p value of Student t-test against control condition at the same time point. Some genes are represented by more than one probe. Classification was done using the IPA software
